# Supplementary material
Source: PubMed Central journal article supplement (PMC4801692)
Supplement: NIHMS755890-supplement.pdf [file NIHMS755890-supplement.pdf]

## Supplementary Figure Legends

**Supplementary Figure 1.** WT and cDKO representative splenic T cell gating used to identify subpopulations within peripheral T cells. **(A)** Total T cells were identified as CD3 $\epsilon$ <sup>+</sup> GFP<sup>+/-</sup> and then were further identified as **(B)** CD8 $\alpha$ <sup>+</sup> and **(C)** CD4<sup>+</sup> T cells. **(D)** CD4<sup>+</sup> T cells were further subdivided into CD4<sup>+</sup> CD25<sup>-</sup> T<sub>Conv</sub> and CD4<sup>+</sup> CD25<sup>+</sup> T<sub>Reg</sub> cells.

**Supplementary Figure 2.** WT and cDKO representative gating used to identify thymocyte subpopulations. **(A)** Using CD8 $\alpha$  and CD4 staining, thymocytes were subdivided into double negative (CD8 $\alpha$ <sup>-</sup> CD4<sup>-</sup>), double positive (CD8 $\alpha$ <sup>+</sup> CD4<sup>+</sup>) and single positive (CD8 $\alpha$ <sup>+</sup> CD4<sup>-</sup> and CD8 $\alpha$ <sup>-</sup> CD4<sup>+</sup>) populations. **(B)** T<sub>Regs</sub> and their precursors were identified within the CD4 single positive population as CD4<sup>+</sup> CD25<sup>+</sup>. **(C-E)** Representative gating of GFP<sup>+/-</sup> cells within the **(C)** CD8 $\alpha$ <sup>+</sup> CD4<sup>-</sup>, **(D)** CD8 $\alpha$ <sup>-</sup> CD4<sup>+</sup> CD25<sup>-</sup> and **(E)** CD8 $\alpha$ <sup>-</sup> CD4<sup>+</sup> CD25<sup>+</sup> populations. Quantification of the **(F)** percentage of GFP<sup>+</sup>, **(G)** total numbers of GFP<sup>+</sup> and **(H)** and total numbers of GFP<sup>-</sup> cells within the above-mentioned T cell subsets. **(F-H)** Number of animals per group: WT = 4, cDKO = 4. Student's t-Test: \* p ≤ 0.05

**Supplementary Figure 3.** Representative *Cd8a*, *Cd4* and *Foxp3* UCSC genome browser tracks from WT and cDKO T cell subsets. **(A)** *Cd8a*, **(B)** *Cd4* and **(C)** *Foxp3* UCSC genome browser tracks for WT and cDKO CD8 $\alpha$ <sup>+</sup>, T<sub>Conv</sub> and T<sub>Reg</sub> cells.

# Supplementary Figure 1

**A**

Gated on DAPI<sup>-</sup> Live Cells:

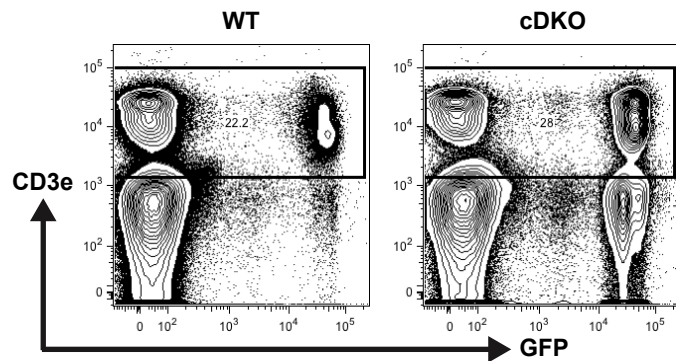

**B**

Gated on CD3e<sup>+</sup> GFP<sup>+/-</sup>:

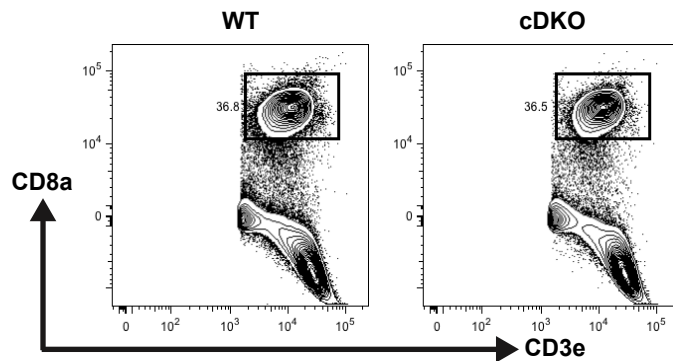

**C**

Gated on CD3e<sup>+</sup> GFP<sup>+/-</sup>:

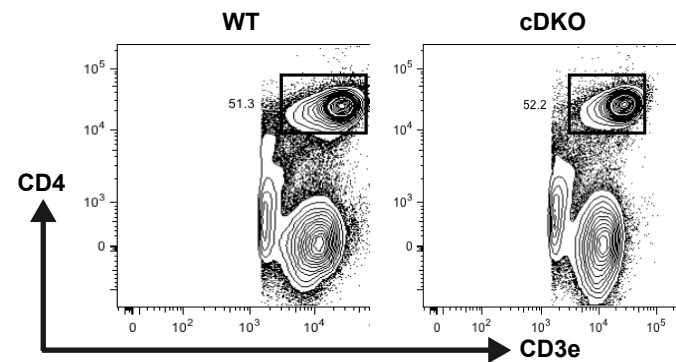

**D**

Gated on CD3e<sup>+</sup> CD4<sup>+</sup>:

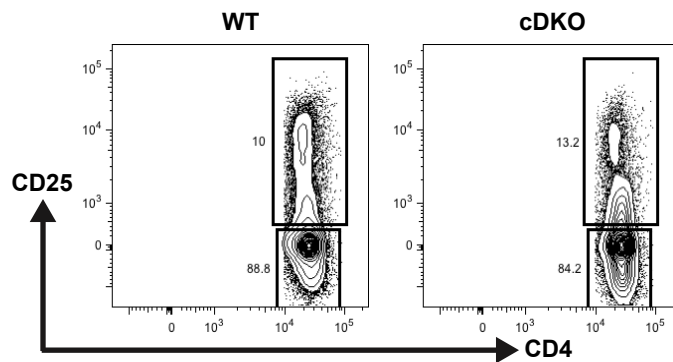

## Supplementary Figure 2

**A**

Gated on DAPI<sup>-</sup> Live Cells:

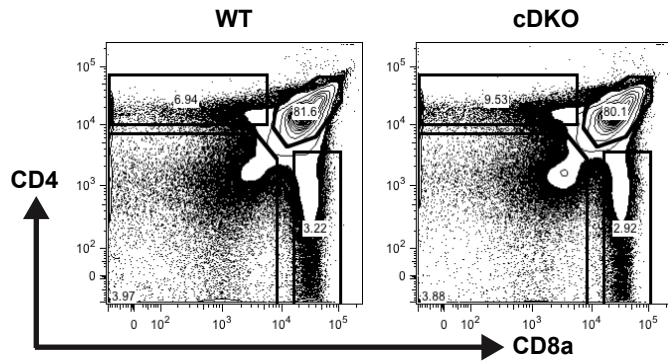

**B**

Gated on CD8a<sup>-</sup> CD4<sup>+</sup>:

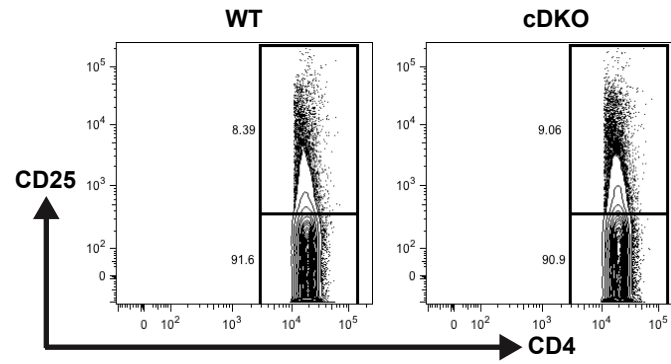

**C**

Gated on CD8a<sup>+</sup> CD4<sup>-</sup>:

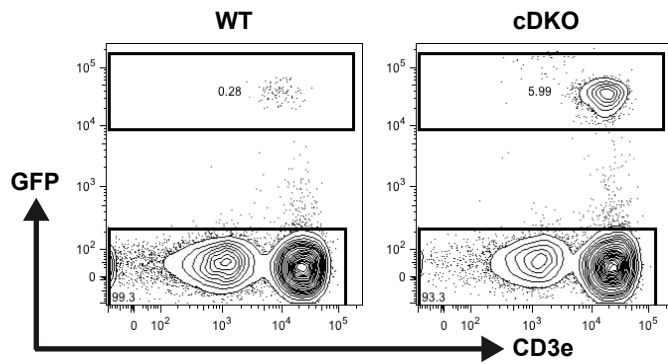

**D**

Gated on CD8a<sup>-</sup> CD4<sup>+</sup> CD25<sup>-</sup> (T<sub>Conv</sub>):

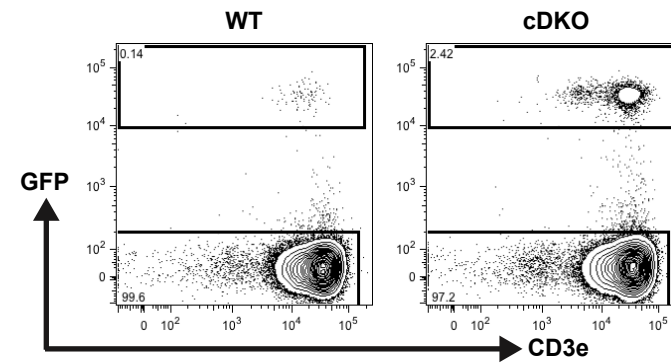

**E**

Gated on CD8a<sup>-</sup> CD4<sup>+</sup> CD25<sup>+</sup> (T<sub>Reg</sub> and Precursors):

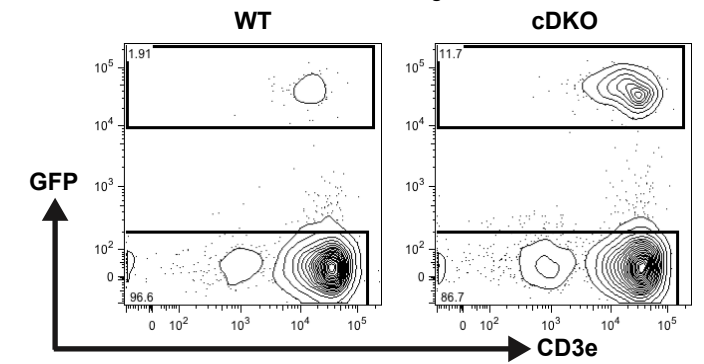

**F**

Percentage of GFP<sup>+</sup>

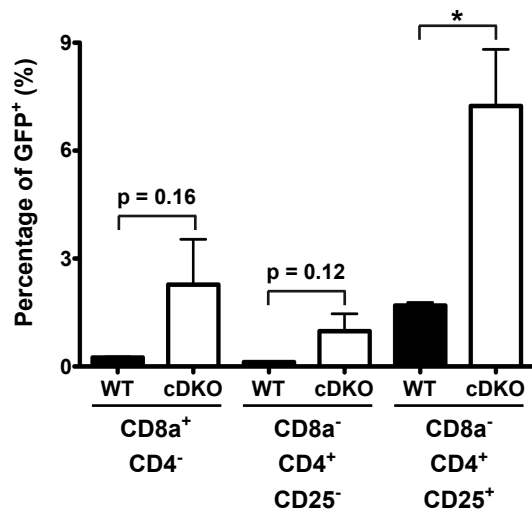

**G**

GFP<sup>+</sup> Cells

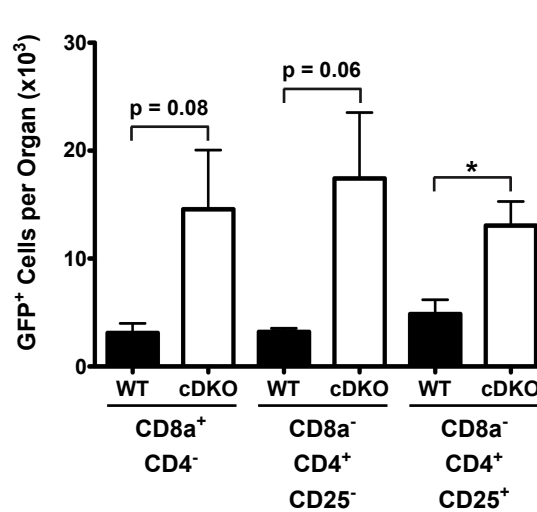

**H**

GFP<sup>-</sup> Cells

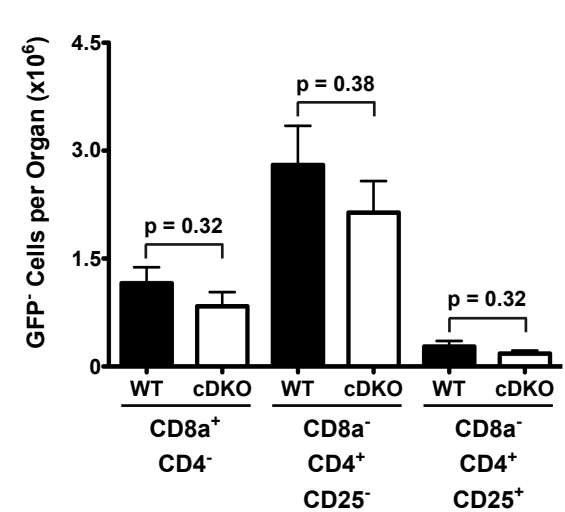

**Supplementary Figure 3**

**A**

***Cd8a* UCSC Genome Browser**

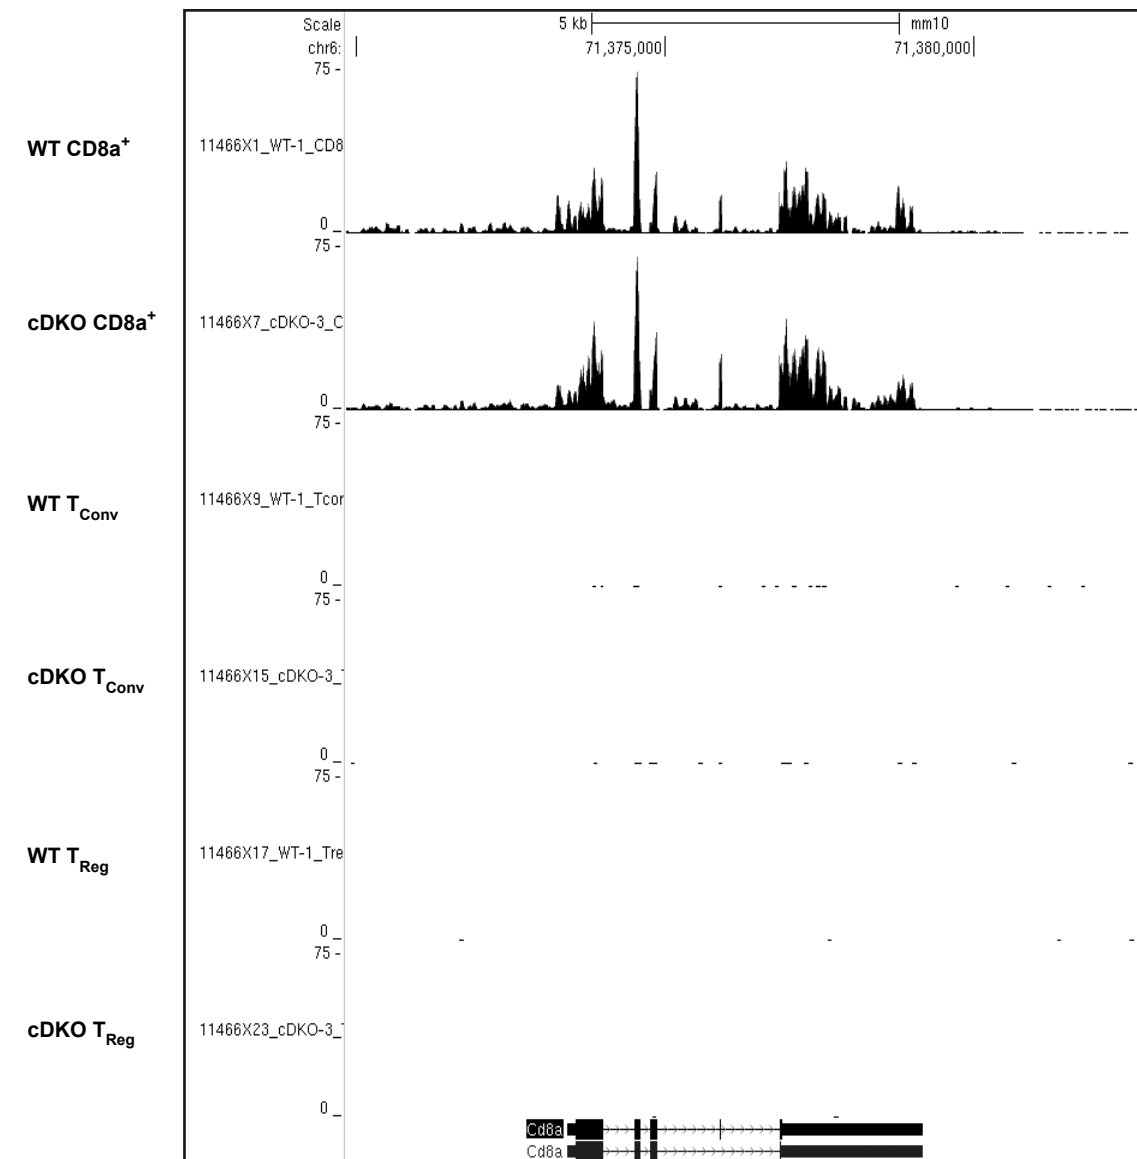

**B**

***Cd4* UCSC Genome Browser**

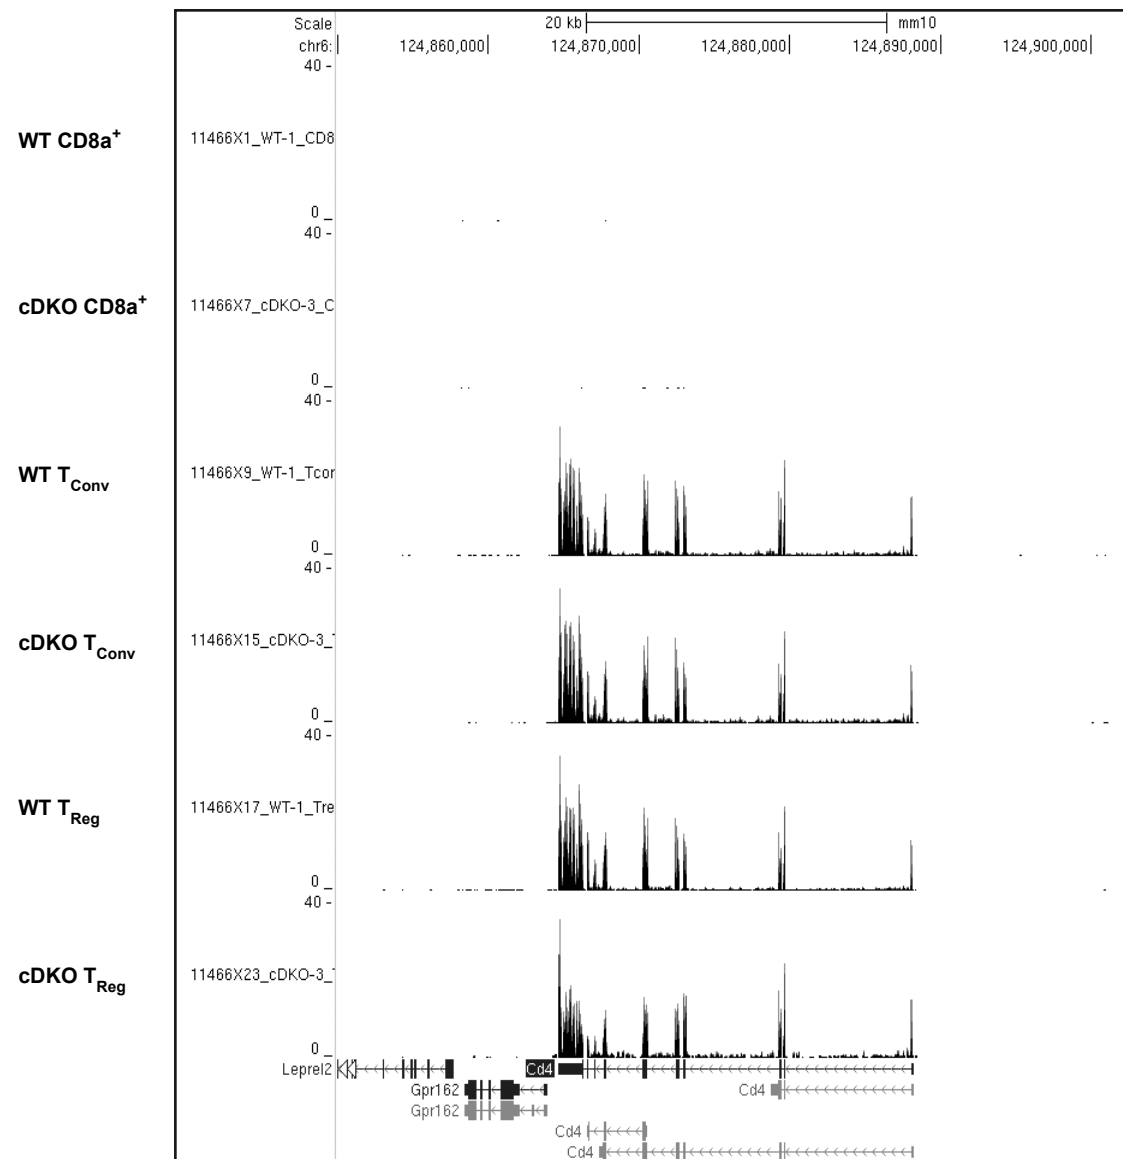

**C**

***Foxp3* UCSC Genome Browser**

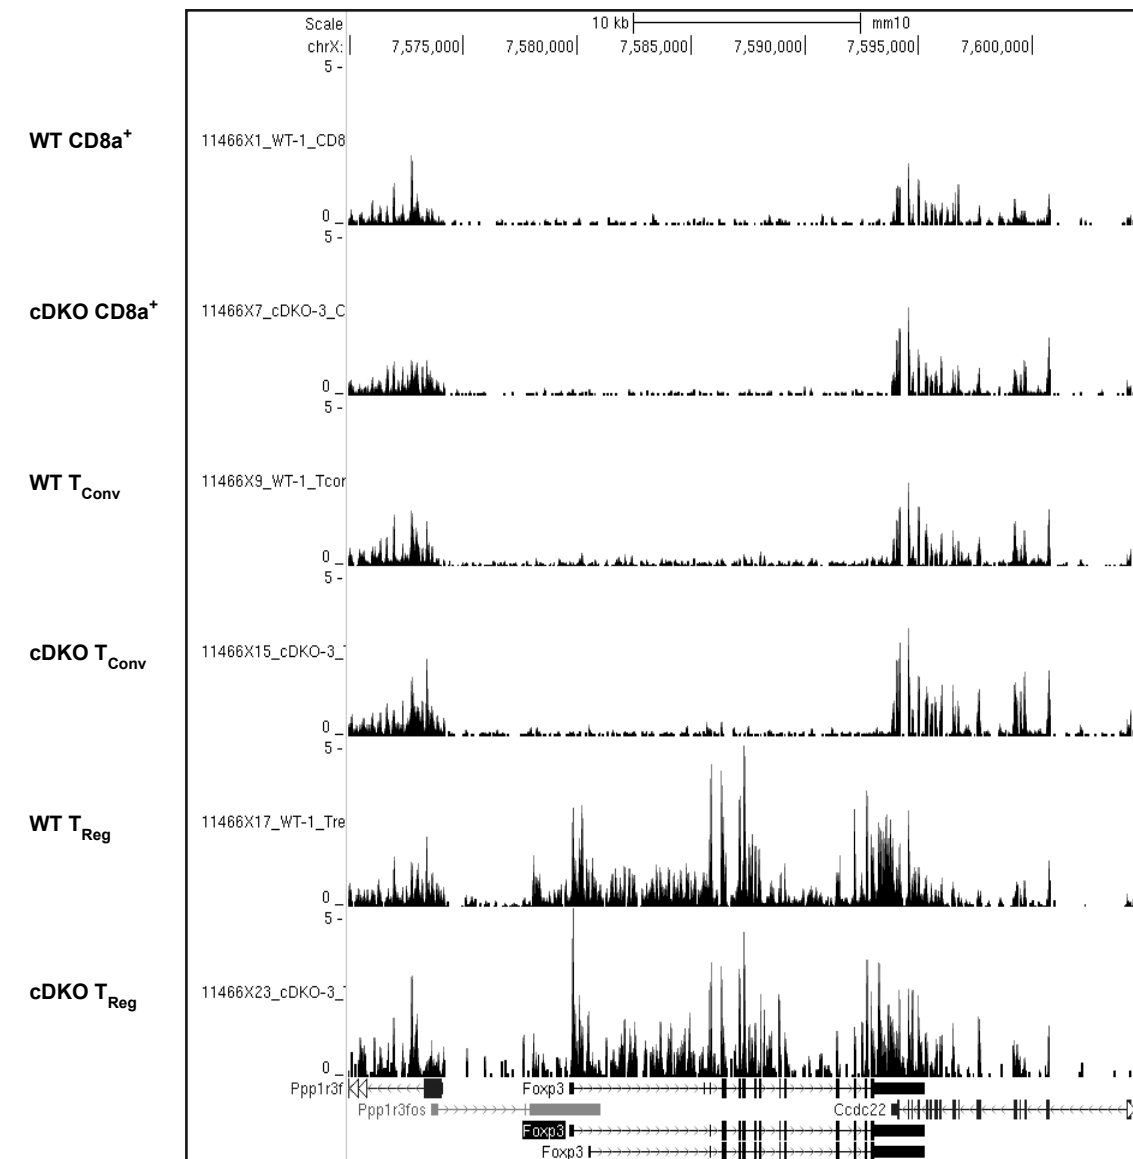

| <b>Gene Target</b>             | <b>Forward Primer (5' =&gt; 3')</b> | <b>Reverse Primer (5' =&gt; 3')</b> | <b>Amplicon (basepairs)</b> |
|--------------------------------|-------------------------------------|-------------------------------------|-----------------------------|
| <i>Snai2</i> WT<br>(4861/4712) | CATCCTTGGGGCGTGAAGTCC               | CACATATTCCTTGTCACAGTACTTGC          | ~250                        |
| <i>Snai2</i> KO<br>(4709/4707) | CTCTTGGCTGTGATTGGTTACTTC            | TGGCGCCTACCGGTGGATGTGGAATG          | ~200                        |
| <i>Snai3</i> KN<br>(3080/3079) | CCTTGCCAGCACTTGTCTCTTC              | GAAATCTGCCAGCCTCTGCCTATCC           | WT ~180<br>KN ~210          |
| <i>Vav-Cre</i><br>(5055/5056)  | AGATGCCAGGACATCAGGAACCTG            | ATCAGCCACACCAGACACAGAGATC           | ~230                        |

**Supplementary Table 1:** Primer sequences utilized for genotyping. Numbers in parentheses reference identification number in the Weis lab primer database.

*Abbreviations:* WT = wildtype, KO = knockout, KN = knockin

| <b>Antibody</b>  | <b>Clone #</b> | <b>Dilution</b> | <b>Manufacturer</b> |
|------------------|----------------|-----------------|---------------------|
| αCD16+32         | 93             | 1:1000          | BioLegend           |
| αCD4-PerCP/Cy5.5 | GK1.5          | 1:400           | BioLegend           |
| αCD8α-AF700      | 53-6.7         | 1:400           | BioLegend           |
| αCD44-PE/Cy7     | IM7            | 1:200           | BioLegend           |
| αCD25-PE         | PC61           | 1:400           | BioLegend           |
| αCD3ε-APC        | 145-2C11       | 1:100           | BioLegend           |

**Supplementary Table 2:** Antibodies utilized for FACS analysis. Listed for each antibody is the clone number, working dilution and manufacturer.

Supplementary Table 3: Significantly altered genes in CD8a+ cells. Red highlights Y-linked and X-chromosome-associated genes.

| Associated Gene Name | Description                                                                                                         | WT / cDKO Log2 Fold Change | p-value  |
|----------------------|---------------------------------------------------------------------------------------------------------------------|----------------------------|----------|
| <i>Eif2s3y</i>       | eukaryotic translation initiation factor 2, subunit 3, structural gene Y-linked [Source:MGI Symbol;Acc:MGI:1349430] | -18.35                     | 3.51E-03 |
| <i>Sva</i>           | seminal vesicle antigen [Source:MGI Symbol;Acc:MGI:102785]                                                          | -15.76                     | 1.17E-04 |
| <i>Uty</i>           | ubiquitously transcribed tetratricopeptide repeat gene, Y chromosome [Source:MGI Symbol;Acc:MGI:894810]             | -12.44                     | 1.48E-06 |
| <i>Ddx3y</i>         | DEAD (Asp-Glu-Ala-Asp) box polypeptide 3, Y-linked [Source:MGI Symbol;Acc:MGI:1349406]                              | -10.58                     | 7.65E-06 |
| <i>Kdm5d</i>         | lysine (K)-specific demethylase 5D [Source:MGI Symbol;Acc:MGI:99780]                                                | -10.09                     | 3.24E-05 |
| <i>Wscd1</i>         | WSC domain containing 1 [Source:MGI Symbol;Acc:MGI:2448493]                                                         | -2.68                      | 1.28E-02 |
| <i>Gm15494</i>       | predicted gene 15494 [Source:MGI Symbol;Acc:MGI:3782940]                                                            | -2.46                      | 4.26E-02 |
| <i>Gm26316</i>       | predicted gene, 26316 [Source:MGI Symbol;Acc:MGI:5456093]                                                           | -2.38                      | 1.13E-02 |
| <i>Gm11209</i>       | predicted gene 11209 [Source:MGI Symbol;Acc:MGI:3650632]                                                            | -2.28                      | 1.79E-02 |
| <i>Ak8</i>           | adenylate kinase 8 [Source:MGI Symbol;Acc:MGI:1916120]                                                              | -2.10                      | 1.80E-02 |
| <i>Klb</i>           | klotho beta [Source:MGI Symbol;Acc:MGI:1932466]                                                                     | -2.07                      | 3.16E-02 |
| <i>Gm11628</i>       | predicted gene 11628 [Source:MGI Symbol;Acc:MGI:3651276]                                                            | -1.89                      | 2.65E-02 |
| <i>Gm26895</i>       | predicted gene, 26895 [Source:MGI Symbol;Acc:MGI:5477389]                                                           | -1.79                      | 3.80E-02 |
| <i>Gm17545</i>       | predicted gene, 17545 [Source:MGI Symbol;Acc:MGI:4937179]                                                           | -1.75                      | 3.70E-02 |
| <i>Gm9522</i>        | predicted gene 9522 [Source:MGI Symbol;Acc:MGI:3779931]                                                             | -1.72                      | 1.88E-02 |
| <i>Pde6g</i>         | phosphodiesterase 6G, cGMP-specific, rod, gamma [Source:MGI Symbol;Acc:MGI:97526]                                   | -1.72                      | 1.11E-02 |
| <i>Nxpe4</i>         | neurexophilin and PC-esterase domain family, member 4 [Source:MGI Symbol;Acc:MGI:1924792]                           | -1.67                      | 2.95E-02 |
| <i>Mir17</i>         | microRNA 17 [Source:MGI Symbol;Acc:MGI:3619065]                                                                     | -1.67                      | 3.19E-03 |
| <i>Fhdc1</i>         | FH2 domain containing 1 [Source:MGI Symbol;Acc:MGI:2684972]                                                         | -1.64                      | 1.22E-02 |
| <i>Gm22051</i>       | predicted gene, 22051 [Source:MGI Symbol;Acc:MGI:5451828]                                                           | -1.63                      | 3.39E-03 |
| <i>Mir23a</i>        | microRNA 23a [Source:MGI Symbol;Acc:MGI:2676897]                                                                    | -1.61                      | 3.69E-02 |
| <i>Dnm3</i>          | dynamin 3 [Source:MGI Symbol;Acc:MGI:1341299]                                                                       | -1.55                      | 2.60E-02 |
| <i>Spaca1</i>        | sperm acrosome associated 1 [Source:MGI Symbol;Acc:MGI:1914902]                                                     | -1.54                      | 5.00E-02 |
| <i>Gm22486</i>       | predicted gene, 22486 [Source:MGI Symbol;Acc:MGI:5452263]                                                           | -1.52                      | 3.72E-02 |
| <i>Gm6910</i>        | predicted gene 6910 [Source:MGI Symbol;Acc:MGI:3648043]                                                             | -1.52                      | 2.11E-02 |
| <i>Gm15921</i>       | predicted gene 15921 [Source:MGI Symbol;Acc:MGI:3801933]                                                            | -1.51                      | 1.24E-02 |
| <i>Ptpn3</i>         | protein tyrosine phosphatase, non-receptor type 3 [Source:MGI Symbol;Acc:MGI:105307]                                | -1.50                      | 3.17E-03 |
| <i>Gm12176</i>       | predicted gene 12176 [Source:MGI Symbol;Acc:MGI:3651497]                                                            | -1.47                      | 4.48E-02 |
| <i>1810019D21Rik</i> | RIKEN cDNA 1810019D21 gene [Source:MGI Symbol;Acc:MGI:1917021]                                                      | -1.43                      | 4.98E-02 |
| <i>Rps19-ps9</i>     | ribosomal protein S19, pseudogene 9 [Source:MGI Symbol;Acc:MGI:3641929]                                             | -1.42                      | 2.61E-02 |
| <i>Gm22154</i>       | predicted gene, 22154 [Source:MGI Symbol;Acc:MGI:5451931]                                                           | -1.40                      | 2.62E-02 |
| <i>Tdrd5</i>         | tudor domain containing 5 [Source:MGI Symbol;Acc:MGI:2684949]                                                       | -1.39                      | 2.78E-02 |
| <i>Trdv5</i>         | T cell receptor delta variable 5 [Source:MGI Symbol;Acc:MGI:3704133]                                                | -1.33                      | 3.03E-02 |
| <i>Ighj2</i>         | immunoglobulin heavy joining 2 [Source:MGI Symbol;Acc:MGI:4439803]                                                  | -1.33                      | 4.15E-03 |
| <i>Gm24724</i>       | predicted gene, 24724 [Source:MGI Symbol;Acc:MGI:5454501]                                                           | -1.32                      | 3.95E-02 |
| <i>Gm15994</i>       | predicted gene 15994 [Source:MGI Symbol;Acc:MGI:3801929]                                                            | -1.32                      | 2.10E-02 |
| <i>Wnt5b</i>         | wingless-type MMTV integration site family, member 5B [Source:MGI Symbol;Acc:MGI:98959]                             | -1.31                      | 1.02E-02 |
| <i>Rpl19-ps11</i>    | ribosomal protein L19, pseudogene 11 [Source:MGI Symbol;Acc:MGI:3642193]                                            | -1.28                      | 4.23E-02 |
| <i>Gm4462</i>        | predicted gene 4462 [Source:MGI Symbol;Acc:MGI:3782646]                                                             | -1.25                      | 9.28E-03 |
| <i>Mir219a-1</i>     | microRNA 219a-1 [Source:MGI Symbol;Acc:MGI:3618753]                                                                 | -1.20                      | 4.20E-02 |
| <i>Gm26003</i>       | predicted gene, 26003 [Source:MGI Symbol;Acc:MGI:5455780]                                                           | -1.20                      | 1.50E-02 |
| <i>n-R5s183</i>      | nuclear encoded rRNA 5S 183 [Source:MGI Symbol;Acc:MGI:4422048]                                                     | -1.19                      | 3.44E-02 |
| <i>Gm3235</i>        | predicted gene 3235 [Source:MGI Symbol;Acc:MGI:3781413]                                                             | -1.16                      | 1.48E-02 |
| <i>Gm26493</i>       | predicted gene, 26493 [Source:MGI Symbol;Acc:MGI:5456270]                                                           | -1.16                      | 4.36E-02 |
| <i>Sox5</i>          | SRY (sex determining region Y)-box 5 [Source:MGI Symbol;Acc:MGI:98367]                                              | -1.16                      | 8.09E-04 |
| <i>Srp54b</i>        | signal recognition particle 54B [Source:MGI Symbol;Acc:MGI:3714357]                                                 | -1.15                      | 2.54E-03 |
| <i>Gm15738</i>       | predicted gene 15738 [Source:MGI Symbol;Acc:MGI:3783180]                                                            | -1.12                      | 3.76E-04 |
| <i>Gm24191</i>       | predicted gene, 24191 [Source:MGI Symbol;Acc:MGI:5453968]                                                           | -1.12                      | 1.70E-02 |
| <i>Gm6345</i>        | predicted gene 6345 [Source:MGI Symbol;Acc:MGI:3647370]                                                             | -1.10                      | 4.03E-02 |
| <i>Bmf</i>           | BCL2 modifying factor [Source:MGI Symbol;Acc:MGI:2176433]                                                           | -1.09                      | 1.55E-03 |
| <i>Tmtc2</i>         | transmembrane and tetratricopeptide repeat containing 2 [Source:MGI Symbol;Acc:MGI:1914057]                         | -1.08                      | 3.61E-02 |
| <i>Gm16201</i>       | predicted gene 16201 [Source:MGI Symbol;Acc:MGI:3802153]                                                            | -1.08                      | 1.71E-02 |
| <i>Gm24134</i>       | predicted gene, 24134 [Source:MGI Symbol;Acc:MGI:5453911]                                                           | -1.07                      | 3.11E-02 |

|                      |                                                                                                                  |       |          |
|----------------------|------------------------------------------------------------------------------------------------------------------|-------|----------|
| <i>Gm5963</i>        | predicted pseudogene 5963 [Source:MGI Symbol;Acc:MGI:3648418]                                                    | -1.07 | 3.17E-02 |
| <i>Gm7808</i>        | predicted pseudogene 7808 [Source:MGI Symbol;Acc:MGI:3643360]                                                    | -1.06 | 2.27E-03 |
| <i>Mir677</i>        | microRNA 677 [Source:MGI Symbol;Acc:MGI:3629885]                                                                 | -1.06 | 9.60E-03 |
| <i>Myom1</i>         | myomesin 1 [Source:MGI Symbol;Acc:MGI:1341430]                                                                   | -1.06 | 1.18E-03 |
| <i>Gm12279</i>       | predicted gene 12279 [Source:MGI Symbol;Acc:MGI:3649630]                                                         | -1.05 | 2.74E-03 |
| <i>Gm12254</i>       | predicted gene 12254 [Source:MGI Symbol;Acc:MGI:3650324]                                                         | -1.05 | 4.27E-02 |
| <i>Gm16334</i>       | predicted gene 16334 [Source:MGI Symbol;Acc:MGI:3840149]                                                         | -1.04 | 7.56E-04 |
| <i>Gm15429</i>       | predicted pseudogene 15429 [Source:MGI Symbol;Acc:MGI:3642423]                                                   | -1.01 | 2.85E-03 |
| <i>Phlda3</i>        | pleckstrin homology-like domain, family A, member 3 [Source:MGI Symbol;Acc:MGI:1351485]                          | -1.01 | 4.15E-02 |
| <i>Rnaset2a</i>      | ribonuclease T2A [Source:MGI Symbol;Acc:MGI:1915445]                                                             | -1.00 | 1.25E-02 |
| <i>Cables1</i>       | CDK5 and Abl enzyme substrate 1 [Source:MGI Symbol;Acc:MGI:1927065]                                              | 1.02  | 8.43E-03 |
| <i>Wnt8b</i>         | wingless-type MMTV integration site family, member 8B [Source:MGI Symbol;Acc:MGI:109485]                         | 1.02  | 5.54E-03 |
| <i>Iffl3</i>         | interferon-induced protein with tetratricopeptide repeats 3 [Source:MGI Symbol;Acc:MGI:1101055]                  | 1.03  | 4.04E-02 |
| <i>Ube2l6</i>        | ubiquitin-conjugating enzyme E2L 6 [Source:MGI Symbol;Acc:MGI:1914500]                                           | 1.04  | 3.14E-02 |
| <i>Rel1</i>          | REL1-like 1 [Source:MGI Symbol;Acc:MGI:2140767]                                                                  | 1.05  | 1.00E-03 |
| <i>A430018G15Rik</i> | RIKEN cDNA A430018G15 gene [Source:MGI Symbol;Acc:MGI:3040796]                                                   | 1.08  | 7.88E-04 |
| <i>Gm12596</i>       | predicted gene 12596 [Source:MGI Symbol;Acc:MGI:3649247]                                                         | 1.08  | 1.12E-02 |
| <i>Gm10232</i>       | predicted pseudogene 10232 [Source:MGI Symbol;Acc:MGI:3641637]                                                   | 1.09  | 2.65E-02 |
| <i>Dmrt1</i>         | doublesex and mab-3 related transcription factor like family A1 [Source:MGI Symbol;Acc:MGI:2653627]              | 1.11  | 1.02E-02 |
| <i>I830012O16Rik</i> | RIKEN cDNA I830012O16 gene [Source:MGI Symbol;Acc:MGI:3698419]                                                   | 1.12  | 3.76E-02 |
| <i>Gm5620</i>        | predicted gene 5620 [Source:MGI Symbol;Acc:MGI:3647798]                                                          | 1.13  | 4.10E-02 |
| <i>Entpd1</i>        | ectonucleoside triphosphate diphosphohydrolase 1 [Source:MGI Symbol;Acc:MGI:102805]                              | 1.15  | 2.87E-02 |
| <i>Ly6i</i>          | lymphocyte antigen 6 complex, locus I [Source:MGI Symbol;Acc:MGI:1888480]                                        | 1.15  | 2.40E-02 |
| <i>Gm24840</i>       | predicted gene, 24840 [Source:MGI Symbol;Acc:MGI:5454617]                                                        | 1.16  | 1.74E-03 |
| <i>Zfp69</i>         | zinc finger protein 69 [Source:MGI Symbol;Acc:MGI:107794]                                                        | 1.19  | 2.94E-02 |
| <i>Henmt1</i>        | HEN1 methyltransferase homolog 1 (Arabidopsis) [Source:MGI Symbol;Acc:MGI:1913965]                               | 1.20  | 2.42E-02 |
| <i>Abcb11</i>        | ATP-binding cassette, sub-family B (MDR/TAP), member 11 [Source:MGI Symbol;Acc:MGI:1351619]                      | 1.23  | 1.32E-02 |
| <i>Pde4a</i>         | phosphodiesterase 4A, cAMP specific [Source:MGI Symbol;Acc:MGI:99558]                                            | 1.26  | 1.78E-02 |
| <i>Pros1</i>         | protein S (alpha) [Source:MGI Symbol;Acc:MGI:1095733]                                                            | 1.28  | 4.95E-03 |
| <i>Gm7117</i>        | predicted pseudogene 7117 [Source:MGI Symbol;Acc:MGI:3649027]                                                    | 1.31  | 2.28E-02 |
| <i>Gp49a</i>         | glycoprotein 49 A [Source:MGI Symbol;Acc:MGI:102702]                                                             | 1.31  | 3.50E-02 |
| <i>Col27a1</i>       | collagen, type XXVII, alpha 1 [Source:MGI Symbol;Acc:MGI:2672118]                                                | 1.32  | 2.26E-02 |
| <i>Gm11212</i>       | predicted gene 11212 [Source:MGI Symbol;Acc:MGI:3651243]                                                         | 1.32  | 5.21E-04 |
| <i>Rbpsuh-rs3</i>    | recombining binding protein suppressor of hairless (Drosophila), related sequence 3 [Source:MGI Symbol;Acc:MGI:9 | 1.36  | 1.09E-02 |
| <i>Pik3ap1</i>       | phosphoinositide-3-kinase adaptor protein 1 [Source:MGI Symbol;Acc:MGI:1933177]                                  | 1.37  | 2.74E-02 |
| <i>Oit3</i>          | oncoprotein induced transcript 3 [Source:MGI Symbol;Acc:MGI:1201782]                                             | 1.39  | 1.51E-02 |
| <i>Cybb</i>          | cytochrome b-245, beta polypeptide [Source:MGI Symbol;Acc:MGI:88574]                                             | 1.40  | 4.20E-03 |
| <i>Ccdc122</i>       | coiled-coil domain containing 122 [Source:MGI Symbol;Acc:MGI:1918358]                                            | 1.40  | 2.51E-02 |
| <i>Gm23138</i>       | predicted gene, 23138 [Source:MGI Symbol;Acc:MGI:5452915]                                                        | 1.42  | 3.61E-02 |
| <i>Gm16558</i>       | predicted gene 16558 [Source:MGI Symbol;Acc:MGI:4414978]                                                         | 1.45  | 2.63E-02 |
| <i>Ccl3</i>          | chemokine (C-C motif) ligand 3 [Source:MGI Symbol;Acc:MGI:98260]                                                 | 1.46  | 4.45E-02 |
| <i>Gm25436</i>       | predicted gene, 25436 [Source:MGI Symbol;Acc:MGI:5455213]                                                        | 1.48  | 3.87E-02 |
| <i>Gm25109</i>       | predicted gene, 25109 [Source:MGI Symbol;Acc:MGI:5454886]                                                        | 1.50  | 2.72E-02 |
| <i>Gm22300</i>       | predicted gene, 22300 [Source:MGI Symbol;Acc:MGI:5452077]                                                        | 1.51  | 2.19E-02 |
| <i>Gm15819</i>       | predicted gene 15819 [Source:MGI Symbol;Acc:MGI:3802175]                                                         | 1.52  | 3.45E-05 |
| <i>BC049352</i>      | cDNA sequence BC049352 [Source:MGI Symbol;Acc:MGI:3040681]                                                       | 1.55  | 2.08E-02 |
| <i>Map2</i>          | microtubule-associated protein 2 [Source:MGI Symbol;Acc:MGI:97175]                                               | 1.56  | 2.96E-02 |
| <i>Ctnnd2</i>        | catenin (cadherin associated protein), delta 2 [Source:MGI Symbol;Acc:MGI:1195966]                               | 1.56  | 3.39E-02 |
| <i>Kcnj8</i>         | potassium inwardly-rectifying channel, subfamily J, member 8 [Source:MGI Symbol;Acc:MGI:1100508]                 | 1.62  | 2.38E-02 |
| <i>Gm13991</i>       | predicted gene 13991 [Source:MGI Symbol;Acc:MGI:3651689]                                                         | 1.63  | 2.96E-02 |
| <i>1810059H22Rik</i> | RIKEN cDNA 1810059H22 gene [Source:MGI Symbol;Acc:MGI:1917070]                                                   | 1.64  | 3.46E-02 |
| <i>Gm16701</i>       | predicted gene, 16701 [Source:MGI Symbol;Acc:MGI:4439625]                                                        | 1.68  | 9.05E-03 |
| <i>Ryk</i>           | receptor-like tyrosine kinase [Source:MGI Symbol;Acc:MGI:101766]                                                 | 1.69  | 3.64E-02 |
| <i>Gm7367</i>        | predicted pseudogene 7367 [Source:MGI Symbol;Acc:MGI:3646404]                                                    | 1.71  | 4.98E-02 |
| <i>Rpl5-ps1</i>      | ribosomal protein L5, pseudogene 1 [Source:MGI Symbol;Acc:MGI:3647110]                                           | 1.72  | 2.72E-02 |
| <i>C1qtnf3</i>       | C1q and tumor necrosis factor related protein 3 [Source:MGI Symbol;Acc:MGI:1932136]                              | 2.01  | 4.29E-02 |



|                |                                                                                         |      |          |
|----------------|-----------------------------------------------------------------------------------------|------|----------|
| <i>Gm12460</i> | predicted gene 12460 [Source:MGI Symbol;Acc:MGI:3650440]                                | 2.03 | 1.39E-02 |
| <i>Plch2</i>   | phospholipase C, eta 2 [Source:MGI Symbol;Acc:MGI:2443078]                              | 2.10 | 2.94E-02 |
| <i>Gm15460</i> | predicted gene 15460 [Source:MGI Symbol;Acc:MGI:3707338]                                | 2.51 | 4.56E-02 |
| <i>Gm23479</i> | predicted gene, 23479 [Source:MGI Symbol;Acc:MGI:5453256]                               | 2.64 | 2.68E-02 |
| <i>Gm8338</i>  | predicted gene 8338 [Source:MGI Symbol;Acc:MGI:3647186]                                 | 2.73 | 3.06E-02 |
| <i>Rapgef1</i> | Rap guanine nucleotide exchange factor (GEF)-like 1 [Source:MGI Symbol;Acc:MGI:3611446] | 2.92 | 3.11E-02 |
| <i>Stc2</i>    | stanniocalcin 2 [Source:MGI Symbol;Acc:MGI:1316731]                                     | 2.97 | 8.05E-03 |
| <i>Gm26992</i> | predicted gene, 26992 [Source:MGI Symbol;Acc:MGI:5504107]                               | 6.63 | 1.68E-04 |
| <i>Tsix</i>    | X (inactive)-specific transcript, opposite strand [Source:MGI Symbol;Acc:MGI:1336196]   | 7.58 | 1.81E-04 |
| <i>Snai3</i>   | snail family zinc finger 3 [Source:MGI Symbol;Acc:MGI:1353563]                          | 7.91 | 1.44E-06 |
| <i>Xist</i>    | inactive X specific transcripts [Source:MGI Symbol;Acc:MGI:98974]                       | 9.34 | 3.85E-04 |

Supplementary Table 4: Significantly altered genes in Tconv cells. Red highlights Y-linked and X-chromosome-associated genes.

| Associated Gene Name | Description                                                                                                         | WT / cDKO Log2 Fold Change | p-value  |
|----------------------|---------------------------------------------------------------------------------------------------------------------|----------------------------|----------|
| <i>Eif2s3y</i>       | eukaryotic translation initiation factor 2, subunit 3, structural gene Y-linked [Source:MGI Symbol;Acc:MGI:1349430] | -11.28                     | 2.81E-03 |
| <i>Ddx3y</i>         | DEAD (Asp-Glu-Ala-Asp) box polypeptide 3, Y-linked [Source:MGI Symbol;Acc:MGI:1349406]                              | -10.77                     | 5.84E-07 |
| <i>Kdm5d</i>         | lysine (K)-specific demethylase 5D [Source:MGI Symbol;Acc:MGI:99780]                                                | -10.75                     | 5.49E-05 |
| <i>Uty</i>           | ubiquitously transcribed tetratricopeptide repeat gene, Y chromosome [Source:MGI Symbol;Acc:MGI:894810]             | -10.04                     | 3.14E-08 |
| <i>Sva</i>           | seminal vesicle antigen [Source:MGI Symbol;Acc:MGI:102785]                                                          | -7.55                      | 5.46E-05 |
| <i>Zfp618</i>        | zinc finger protein 618 [Source:MGI Symbol;Acc:MGI:1919950]                                                         | -4.01                      | 1.76E-04 |
| <i>Gm9522</i>        | predicted gene 9522 [Source:MGI Symbol;Acc:MGI:3779931]                                                             | -1.69                      | 6.44E-03 |
| <i>Mir2861</i>       | microRNA 2861 [Source:MGI Symbol;Acc:MGI:4441431]                                                                   | -1.62                      | 4.41E-02 |
| <i>Tusc1</i>         | tumor suppressor candidate 1 [Source:MGI Symbol;Acc:MGI:2684283]                                                    | -1.60                      | 3.92E-04 |
| <i>Prr18</i>         | proline rich 18 [Source:MGI Symbol;Acc:MGI:2443403]                                                                 | -1.50                      | 1.56E-02 |
| <i>Gm9387</i>        | predicted pseudogene 9387 [Source:MGI Symbol;Acc:MGI:3643269]                                                       | -1.48                      | 3.60E-02 |
| <i>Spaca1</i>        | sperm acrosome associated 1 [Source:MGI Symbol;Acc:MGI:1914902]                                                     | -1.39                      | 1.99E-02 |
| <i>Rpl28-ps3</i>     | ribosomal protein L28, pseudogene 3 [Source:MGI Symbol;Acc:MGI:3650282]                                             | -1.33                      | 1.61E-02 |
| <i>Tle2</i>          | transducin-like enhancer of split 2, homolog of Drosophila E(spl) [Source:MGI Symbol;Acc:MGI:104635]                | -1.30                      | 2.30E-02 |
| <i>Sec1</i>          | secretory blood group 1 [Source:MGI Symbol;Acc:MGI:1928893]                                                         | -1.17                      | 2.40E-02 |
| <i>Srp54b</i>        | signal recognition particle 54B [Source:MGI Symbol;Acc:MGI:3714357]                                                 | -1.09                      | 1.76E-02 |
| <i>1700040D17Rik</i> | RIKEN cDNA 1700040D17 gene [Source:MGI Symbol;Acc:MGI:1923852]                                                      | -1.08                      | 3.85E-02 |
| <i>1700069B07Rik</i> | RIKEN cDNA 1700069B07 gene [Source:MGI Symbol;Acc:MGI:1923863]                                                      | -1.05                      | 3.45E-02 |
| <i>Rasgef1b</i>      | RasGEF domain family, member 1B [Source:MGI Symbol;Acc:MGI:2443755]                                                 | 1.01                       | 3.83E-04 |
| <i>Rassf4</i>        | Ras association (RalGDS/AF-6) domain family member 4 [Source:MGI Symbol;Acc:MGI:2386853]                            | 1.01                       | 8.05E-03 |
| <i>Cc2d2a</i>        | coiled-coil and C2 domain containing 2A [Source:MGI Symbol;Acc:MGI:1924487]                                         | 1.01                       | 4.11E-02 |
| <i>H2-DMb1</i>       | histocompatibility 2, class II, locus Mb1 [Source:MGI Symbol;Acc:MGI:95922]                                         | 1.01                       | 2.02E-02 |
| <i>Gm13684</i>       | predicted gene 13684 [Source:MGI Symbol;Acc:MGI:3649340]                                                            | 1.01                       | 4.47E-02 |
| <i>Ticrr</i>         | TOPBP1-interacting checkpoint and replication regulator [Source:MGI Symbol;Acc:MGI:1924261]                         | 1.02                       | 1.78E-02 |
| <i>Mir5107</i>       | microRNA 5107 [Source:MGI Symbol;Acc:MGI:4950427]                                                                   | 1.02                       | 2.28E-02 |
| <i>Rel1</i>          | RELT-like 1 [Source:MGI Symbol;Acc:MGI:2140767]                                                                     | 1.03                       | 1.56E-03 |
| <i>Nei3</i>          | nei like 3 (E. coli) [Source:MGI Symbol;Acc:MGI:2384588]                                                            | 1.03                       | 4.21E-02 |
| <i>Kcnab3</i>        | potassium voltage-gated channel, shaker-related subfamily, beta member 3 [Source:MGI Symbol;Acc:MGI:1336208]        | 1.04                       | 4.89E-02 |
| <i>Slc6a9</i>        | solute carrier family 6 (neurotransmitter transporter, glycine), member 9 [Source:MGI Symbol;Acc:MGI:95760]         | 1.05                       | 3.69E-02 |
| <i>Atg4c</i>         | autophagy related 4C, cysteine peptidase [Source:MGI Symbol;Acc:MGI:2651854]                                        | 1.06                       | 7.42E-03 |
| <i>A930019D19Rik</i> | RIKEN cDNA A930019D19 gene [Source:MGI Symbol;Acc:MGI:1925056]                                                      | 1.06                       | 4.58E-03 |
| <i>Siglecg</i>       | sialic acid binding Ig-like lectin G [Source:MGI Symbol;Acc:MGI:2443630]                                            | 1.06                       | 3.80E-02 |
| <i>Adam23</i>        | a disintegrin and metallopeptidase domain 23 [Source:MGI Symbol;Acc:MGI:1345162]                                    | 1.06                       | 4.87E-02 |
| <i>Slc4a5</i>        | solute carrier family 4, sodium bicarbonate cotransporter, member 5 [Source:MGI Symbol;Acc:MGI:2443220]             | 1.06                       | 1.01E-02 |
| <i>Prss30</i>        | protease, serine 30 [Source:MGI Symbol;Acc:MGI:1353645]                                                             | 1.07                       | 3.03E-02 |
| <i>Pou2f2</i>        | POU domain, class 2, transcription factor 2 [Source:MGI Symbol;Acc:MGI:101897]                                      | 1.07                       | 3.38E-02 |
| <i>Hspa2</i>         | heat shock protein 2 [Source:MGI Symbol;Acc:MGI:96243]                                                              | 1.07                       | 4.13E-02 |
| <i>Serpinc1</i>      | serine (or cysteine) peptidase inhibitor, clade C (antithrombin), member 1 [Source:MGI Symbol;Acc:MGI:88095]        | 1.08                       | 1.18E-02 |
| <i>Kmo</i>           | kynurenine 3-monooxygenase (kynurenine 3-hydroxylase) [Source:MGI Symbol;Acc:MGI:2138151]                           | 1.08                       | 5.77E-03 |
| <i>Cd83</i>          | CD83 antigen [Source:MGI Symbol;Acc:MGI:1328316]                                                                    | 1.09                       | 3.62E-02 |
| <i>Lrrk2</i>         | leucine-rich repeat kinase 2 [Source:MGI Symbol;Acc:MGI:1913975]                                                    | 1.09                       | 3.00E-02 |
| <i>Cbfa2t3</i>       | core-binding factor, runt domain, alpha subunit 2, translocated to, 3 (human) [Source:MGI Symbol;Acc:MGI:1338013]   | 1.10                       | 3.20E-02 |
| <i>Cd244</i>         | CD244 natural killer cell receptor 2B4 [Source:MGI Symbol;Acc:MGI:109294]                                           | 1.10                       | 2.59E-02 |
| <i>mt-Nd2</i>        | mitochondrially encoded NADH dehydrogenase 2 [Source:MGI Symbol;Acc:MGI:102500]                                     | 1.10                       | 5.83E-03 |
| <i>Gm13185</i>       | predicted gene 13185 [Source:MGI Symbol;Acc:MGI:3651411]                                                            | 1.11                       | 2.46E-02 |
| <i>Dnase1l3</i>      | deoxyribonuclease 1-like 3 [Source:MGI Symbol;Acc:MGI:1314633]                                                      | 1.11                       | 1.25E-02 |
| <i>Gm26293</i>       | predicted gene, 26293 [Source:MGI Symbol;Acc:MGI:5456070]                                                           | 1.11                       | 1.13E-02 |
| <i>Slc39a5</i>       | solute carrier family 39 (metal ion transporter), member 5 [Source:MGI Symbol;Acc:MGI:1919336]                      | 1.12                       | 4.07E-02 |
| <i>Scarna3b</i>      | small Cajal body-specific RNA 3B [Source:MGI Symbol;Acc:MGI:3819486]                                                | 1.12                       | 3.57E-02 |
| <i>Fit3</i>          | FMS-like tyrosine kinase 3 [Source:MGI Symbol;Acc:MGI:95559]                                                        | 1.13                       | 3.65E-02 |
| <i>Gm22200</i>       | predicted gene, 22200 [Source:MGI Symbol;Acc:MGI:5451977]                                                           | 1.13                       | 1.09E-02 |
| <i>Klri2</i>         | killer cell lectin-like receptor family I member 2 [Source:MGI Symbol;Acc:MGI:2443965]                              | 1.13                       | 3.55E-02 |
| <i>Fndc5</i>         | fibronectin type III domain containing 5 [Source:MGI Symbol;Acc:MGI:1917614]                                        | 1.13                       | 9.56E-03 |

|                      |                                                                                                 |      |          |
|----------------------|-------------------------------------------------------------------------------------------------|------|----------|
| <i>Lyn</i>           | Yamaguchi sarcoma viral (v-yes-1) oncogene homolog [Source:MGI Symbol;Acc:MGI:96892]            | 1.13 | 1.64E-02 |
| <i>Btk</i>           | BRUTON agammaglobulinemia tyrosine kinase [Source:MGI Symbol;Acc:MGI:88216]                     | 1.13 | 1.58E-02 |
| <i>A230005M16Rik</i> | RIKEN cDNA A230005M16 gene [Source:MGI Symbol;Acc:MGI:3603401]                                  | 1.13 | 2.26E-02 |
| <i>Vipr2</i>         | vasoactive intestinal peptide receptor 2 [Source:MGI Symbol;Acc:MGI:107166]                     | 1.14 | 2.28E-02 |
| <i>Selp</i>          | selectin, platelet [Source:MGI Symbol;Acc:MGI:98280]                                            | 1.14 | 4.20E-02 |
| <i>Gm13166</i>       | predicted gene 13166 [Source:MGI Symbol;Acc:MGI:3705130]                                        | 1.14 | 3.06E-02 |
| <i>Cspg5</i>         | chondroitin sulfate proteoglycan 5 [Source:MGI Symbol;Acc:MGI:1352747]                          | 1.14 | 2.26E-02 |
| <i>H2-Aa</i>         | histocompatibility 2, class II antigen A, alpha [Source:MGI Symbol;Acc:MGI:95895]               | 1.15 | 4.91E-02 |
| <i>Hmox1</i>         | heme oxygenase (decycling) 1 [Source:MGI Symbol;Acc:MGI:96163]                                  | 1.15 | 2.09E-02 |
| <i>Spats1</i>        | spermatogenesis associated, serine-rich 1 [Source:MGI Symbol;Acc:MGI:1918270]                   | 1.16 | 1.30E-02 |
| <i>Rnf208</i>        | ring finger protein 208 [Source:MGI Symbol;Acc:MGI:1916096]                                     | 1.17 | 3.69E-02 |
| <i>Gm9857</i>        | predicted gene 9857 [Source:MGI Symbol;Acc:MGI:3704224]                                         | 1.17 | 4.61E-02 |
| <i>Ebi3</i>          | Epstein-Barr virus induced gene 3 [Source:MGI Symbol;Acc:MGI:1354171]                           | 1.18 | 3.06E-02 |
| <i>Ak4</i>           | adenylate kinase 4 [Source:MGI Symbol;Acc:MGI:87979]                                            | 1.18 | 6.02E-03 |
| <i>Gm24875</i>       | predicted gene, 24875 [Source:MGI Symbol;Acc:MGI:5454652]                                       | 1.18 | 1.02E-03 |
| <i>Zfp939</i>        | zinc finger protein 939 [Source:MGI Symbol;Acc:MGI:3036240]                                     | 1.18 | 2.60E-02 |
| <i>Themis2</i>       | thymocyte selection associated family member 2 [Source:MGI Symbol;Acc:MGI:2446213]              | 1.18 | 3.41E-04 |
| <i>Arhgap20os</i>    | Rho GTPase activating protein 20, opposite strand [Source:MGI Symbol;Acc:MGI:3027124]           | 1.19 | 2.86E-02 |
| <i>Gpr35</i>         | G protein-coupled receptor 35 [Source:MGI Symbol;Acc:MGI:1929509]                               | 1.19 | 6.09E-03 |
| <i>Pip5k1</i>        | phosphatidylinositol-4-phosphate 5-kinase-like 1 [Source:MGI Symbol;Acc:MGI:2448520]            | 1.19 | 2.01E-02 |
| <i>Myo1b</i>         | myosin IB [Source:MGI Symbol;Acc:MGI:107752]                                                    | 1.19 | 4.40E-02 |
| <i>Kit</i>           | kit oncogene [Source:MGI Symbol;Acc:MGI:96677]                                                  | 1.19 | 2.34E-02 |
| <i>Pla2g4a</i>       | phospholipase A2, group IVA (cytosolic, calcium-dependent) [Source:MGI Symbol;Acc:MGI:1195256]  | 1.20 | 2.14E-02 |
| <i>Plac8</i>         | placenta-specific 8 [Source:MGI Symbol;Acc:MGI:2445289]                                         | 1.20 | 1.13E-02 |
| <i>Gm8813</i>        | predicted gene 8813 [Source:MGI Symbol;Acc:MGI:3645282]                                         | 1.21 | 4.27E-02 |
| <i>Mctp1</i>         | multiple C2 domains, transmembrane 1 [Source:MGI Symbol;Acc:MGI:1926021]                        | 1.21 | 5.31E-03 |
| <i>Cacna1e</i>       | calcium channel, voltage-dependent, R type, alpha 1E subunit [Source:MGI Symbol;Acc:MGI:106217] | 1.23 | 1.07E-02 |
| <i>Zfp612</i>        | zinc finger protein 612 [Source:MGI Symbol;Acc:MGI:2443465]                                     | 1.23 | 1.55E-02 |
| <i>Gm13054</i>       | predicted gene 13054 [Source:MGI Symbol;Acc:MGI:3702728]                                        | 1.24 | 4.34E-02 |
| <i>n-R5s215</i>      | nuclear encoded rRNA 5S 215 [Source:MGI Symbol;Acc:MGI:4422080]                                 | 1.24 | 1.68E-02 |
| <i>Cdk14</i>         | cyclin-dependent kinase 14 [Source:MGI Symbol;Acc:MGI:894318]                                   | 1.25 | 5.68E-03 |
| <i>Gm25447</i>       | predicted gene, 25447 [Source:MGI Symbol;Acc:MGI:5455224]                                       | 1.26 | 2.93E-03 |
| <i>Plvap</i>         | plasmalemma vesicle associated protein [Source:MGI Symbol;Acc:MGI:1890497]                      | 1.26 | 3.34E-03 |
| <i>Gm15819</i>       | predicted gene 15819 [Source:MGI Symbol;Acc:MGI:3802175]                                        | 1.26 | 1.02E-03 |
| <i>Ago4</i>          | argonaute RISC catalytic subunit 4 [Source:MGI Symbol;Acc:MGI:1924100]                          | 1.27 | 3.96E-02 |
| <i>Bcl2l15</i>       | BCL2-like 15 [Source:MGI Symbol;Acc:MGI:2685412]                                                | 1.28 | 4.50E-02 |
| <i>Gm9311</i>        | predicted gene 9311 [Source:MGI Symbol;Acc:MGI:3644818]                                         | 1.28 | 2.94E-03 |
| <i>Lifr</i>          | leukemia inhibitory factor receptor [Source:MGI Symbol;Acc:MGI:96788]                           | 1.31 | 2.41E-02 |
| <i>Adrbk2</i>        | adrenergic receptor kinase, beta 2 [Source:MGI Symbol;Acc:MGI:87941]                            | 1.31 | 2.20E-02 |
| <i>Phox2a</i>        | paired-like homeobox 2a [Source:MGI Symbol;Acc:MGI:106633]                                      | 1.31 | 3.71E-02 |
| <i>Ston1</i>         | stonin 1 [Source:MGI Symbol;Acc:MGI:1924307]                                                    | 1.31 | 1.49E-02 |
| <i>Col27a1</i>       | collagen, type XXVII, alpha 1 [Source:MGI Symbol;Acc:MGI:2672118]                               | 1.31 | 9.70E-03 |
| <i>Fgl2</i>          | fibrinogen-like protein 2 [Source:MGI Symbol;Acc:MGI:103266]                                    | 1.32 | 3.95E-02 |
| <i>Wdfy4</i>         | WD repeat and FYVE domain containing 4 [Source:MGI Symbol;Acc:MGI:3584510]                      | 1.32 | 1.80E-02 |
| <i>H2-Eb1</i>        | histocompatibility 2, class II antigen E beta [Source:MGI Symbol;Acc:MGI:95901]                 | 1.33 | 1.90E-02 |
| <i>Kynu</i>          | kynureninase (L-kynurenine hydrolase) [Source:MGI Symbol;Acc:MGI:1918039]                       | 1.34 | 3.97E-02 |
| <i>Havcr2</i>        | hepatitis A virus cellular receptor 2 [Source:MGI Symbol;Acc:MGI:2159682]                       | 1.34 | 8.48E-04 |
| <i>Cd300lf</i>       | CD300 antigen like family member F [Source:MGI Symbol;Acc:MGI:2442359]                          | 1.34 | 4.51E-03 |
| <i>Napsa</i>         | napsin A aspartic peptidase [Source:MGI Symbol;Acc:MGI:109365]                                  | 1.36 | 1.36E-02 |
| <i>Gm16386</i>       | predicted gene 16386 [Source:MGI Symbol;Acc:MGI:3646848]                                        | 1.37 | 4.69E-02 |
| <i>Trim7</i>         | tripartite motif-containing 7 [Source:MGI Symbol;Acc:MGI:2137353]                               | 1.38 | 5.29E-03 |
| <i>Ctsh</i>          | cathepsin H [Source:MGI Symbol;Acc:MGI:107285]                                                  | 1.38 | 6.42E-03 |
| <i>mt-Rnr1</i>       | mitochondrially encoded 12S rRNA [Source:MGI Symbol;Acc:MGI:102493]                             | 1.39 | 1.72E-02 |
| <i>Mefv</i>          | Mediterranean fever [Source:MGI Symbol;Acc:MGI:1859396]                                         | 1.40 | 3.10E-02 |
| <i>Gm12186</i>       | predicted gene 12186 [Source:MGI Symbol;Acc:MGI:3649200]                                        | 1.40 | 1.33E-02 |
| <i>Tnn</i>           | tenascin N [Source:MGI Symbol;Acc:MGI:2665790]                                                  | 1.41 | 2.68E-02 |

|                      |                                                                                                                                       |      |          |
|----------------------|---------------------------------------------------------------------------------------------------------------------------------------|------|----------|
| <i>Mikl</i>          | mixed lineage kinase domain-like [Source:MGI Symbol;Acc:MGI:1921818]                                                                  | 1.41 | 2.73E-02 |
| <i>Klf4</i>          | Kruppel-like factor 4 (gut) [Source:MGI Symbol;Acc:MGI:1342287]                                                                       | 1.41 | 1.15E-02 |
| <i>Rapgef1l1</i>     | Rap guanine nucleotide exchange factor (GEF)-like 1 [Source:MGI Symbol;Acc:MGI:3611446]                                               | 1.41 | 3.71E-02 |
| <i>Gpr153</i>        | G protein-coupled receptor 153 [Source:MGI Symbol;Acc:MGI:1916157]                                                                    | 1.41 | 1.82E-02 |
| <i>Rin2</i>          | Ras and Rab interactor 2 [Source:MGI Symbol;Acc:MGI:1921280]                                                                          | 1.41 | 5.51E-03 |
| <i>1700029H14Rik</i> | RIKEN cDNA 1700029H14 gene [Source:MGI Symbol;Acc:MGI:1913751]                                                                        | 1.42 | 2.99E-02 |
| <i>Mreg</i>          | melanoregulin [Source:MGI Symbol;Acc:MGI:2151839]                                                                                     | 1.43 | 1.61E-02 |
| <i>Gm15738</i>       | predicted gene 15738 [Source:MGI Symbol;Acc:MGI:3783180]                                                                              | 1.43 | 3.68E-03 |
| <i>Serpina9</i>      | serine (or cysteine) peptidase inhibitor, clade A (alpha-1 antiproteinase, antitrypsin), member 9 [Source:MGI Symbol;Acc:MGI:1920175] | 1.44 | 3.07E-02 |
| <i>March1</i>        | membrane-associated ring finger (C3HC4) 1 [Source:MGI Symbol;Acc:MGI:1920175]                                                         | 1.45 | 1.02E-02 |
| <i>Obscn</i>         | obscurin, cytoskeletal calmodulin and titin-interacting RhoGEF [Source:MGI Symbol;Acc:MGI:2681862]                                    | 1.45 | 4.18E-03 |
| <i>Gm9670</i>        | predicted gene 9670 [Source:MGI Symbol;Acc:MGI:3780078]                                                                               | 1.46 | 1.44E-02 |
| <i>Bcl11a</i>        | B cell CLL/lymphoma 11A (zinc finger protein) [Source:MGI Symbol;Acc:MGI:106190]                                                      | 1.47 | 1.19E-03 |
| <i>mt-Tt</i>         | mitochondrially encoded tRNA threonine [Source:MGI Symbol;Acc:MGI:102473]                                                             | 1.47 | 1.11E-02 |
| <i>Nostrin</i>       | nitric oxide synthase trafficker [Source:MGI Symbol;Acc:MGI:3606242]                                                                  | 1.50 | 1.22E-02 |
| <i>Ier3</i>          | immediate early response 3 [Source:MGI Symbol;Acc:MGI:104814]                                                                         | 1.52 | 1.91E-02 |
| <i>Tlr4</i>          | toll-like receptor 4 [Source:MGI Symbol;Acc:MGI:96824]                                                                                | 1.53 | 4.20E-02 |
| <i>Orm3</i>          | orosomucoid 3 [Source:MGI Symbol;Acc:MGI:97445]                                                                                       | 1.53 | 1.15E-02 |
| <i>Gm22849</i>       | predicted gene, 22849 [Source:MGI Symbol;Acc:MGI:5452626]                                                                             | 1.53 | 2.81E-02 |
| <i>Rasa12</i>        | RAS protein activator like 2 [Source:MGI Symbol;Acc:MGI:2443881]                                                                      | 1.54 | 4.76E-03 |
| <i>Myadm</i>         | myeloid-associated differentiation marker [Source:MGI Symbol;Acc:MGI:1355332]                                                         | 1.55 | 7.65E-05 |
| <i>Sirpb1a</i>       | signal-regulatory protein beta 1A [Source:MGI Symbol;Acc:MGI:2444824]                                                                 | 1.55 | 2.44E-03 |
| <i>Haao</i>          | 3-hydroxyanthranilate 3,4-dioxygenase [Source:MGI Symbol;Acc:MGI:1349444]                                                             | 1.56 | 1.85E-02 |
| <i>Mpeg1</i>         | macrophage expressed gene 1 [Source:MGI Symbol;Acc:MGI:1333743]                                                                       | 1.56 | 3.58E-04 |
| <i>Ly86</i>          | lymphocyte antigen 86 [Source:MGI Symbol;Acc:MGI:1321404]                                                                             | 1.56 | 5.92E-03 |
| <i>Trpm2</i>         | transient receptor potential cation channel, subfamily M, member 2 [Source:MGI Symbol;Acc:MGI:1351901]                                | 1.57 | 3.96E-02 |
| <i>Eqtn</i>          | equatorin, sperm acrosome associated [Source:MGI Symbol;Acc:MGI:1915003]                                                              | 1.65 | 2.27E-03 |
| <i>Gm11212</i>       | predicted gene 11212 [Source:MGI Symbol;Acc:MGI:3651243]                                                                              | 1.67 | 4.94E-02 |
| <i>Rtn1</i>          | reticulon 1 [Source:MGI Symbol;Acc:MGI:1933947]                                                                                       | 1.67 | 1.65E-02 |
| <i>Lrrc16a</i>       | leucine rich repeat containing 16A [Source:MGI Symbol;Acc:MGI:1915982]                                                                | 1.71 | 2.31E-02 |
| <i>Eps8</i>          | epidermal growth factor receptor pathway substrate 8 [Source:MGI Symbol;Acc:MGI:104684]                                               | 1.74 | 3.45E-03 |
| <i>Pvrl1</i>         | poliovirus receptor-related 1 [Source:MGI Symbol;Acc:MGI:1926483]                                                                     | 1.77 | 6.56E-03 |
| <i>Gm4535</i>        | predicted gene 4535 [Source:MGI Symbol;Acc:MGI:3782719]                                                                               | 1.80 | 1.65E-02 |
| <i>Gm24457</i>       | predicted gene, 24457 [Source:MGI Symbol;Acc:MGI:5454234]                                                                             | 1.80 | 1.32E-02 |
| <i>2900089D17Rik</i> | RIKEN cDNA 2900089D17 gene [Source:MGI Symbol;Acc:MGI:1914527]                                                                        | 1.86 | 3.17E-03 |
| <i>9130208D14Rik</i> | RIKEN cDNA 9130208D14 gene [Source:MGI Symbol;Acc:MGI:1924950]                                                                        | 1.88 | 1.92E-02 |
| <i>Spire1</i>        | spire homolog 1 (Drosophila) [Source:MGI Symbol;Acc:MGI:1915416]                                                                      | 1.90 | 5.91E-06 |
| <i>C330013J21Rik</i> | RIKEN cDNA C330013J21 gene [Source:MGI Symbol;Acc:MGI:1925953]                                                                        | 1.91 | 2.66E-02 |
| <i>Cyp17a1</i>       | cytochrome P450, family 17, subfamily a, polypeptide 1 [Source:MGI Symbol;Acc:MGI:88586]                                              | 1.92 | 2.53E-02 |
| <i>mt-Tw</i>         | mitochondrially encoded tRNA tryptophan [Source:MGI Symbol;Acc:MGI:102471]                                                            | 1.95 | 2.34E-03 |
| <i>Arl13a</i>        | ADP-ribosylation factor-like 13A [Source:MGI Symbol;Acc:MGI:1921698]                                                                  | 1.96 | 4.94E-02 |
| <i>Tns3</i>          | tensin 3 [Source:MGI Symbol;Acc:MGI:2443012]                                                                                          | 1.97 | 7.47E-03 |
| <i>Ankrd35</i>       | ankyrin repeat domain 35 [Source:MGI Symbol;Acc:MGI:2442590]                                                                          | 1.97 | 2.21E-02 |
| <i>Gm15379</i>       | predicted gene 15379 [Source:MGI Symbol;Acc:MGI:3705643]                                                                              | 2.01 | 3.08E-02 |
| <i>Cacna1s</i>       | calcium channel, voltage-dependent, L type, alpha 1S subunit [Source:MGI Symbol;Acc:MGI:88294]                                        | 2.05 | 8.42E-03 |
| <i>Myc1</i>          | v-myc myelocytomatosis viral oncogene homolog, lung carcinoma derived (avian) [Source:MGI Symbol;Acc:MGI:96799]                       | 2.06 | 1.65E-02 |
| <i>M1ap</i>          | meiosis 1 associated protein [Source:MGI Symbol;Acc:MGI:1315200]                                                                      | 2.07 | 1.18E-02 |
| <i>Plscr4</i>        | phospholipid scramblase 4 [Source:MGI Symbol;Acc:MGI:2143267]                                                                         | 2.09 | 2.03E-02 |
| <i>Gm13388</i>       | predicted gene 13388 [Source:MGI Symbol;Acc:MGI:3649903]                                                                              | 2.11 | 1.75E-03 |
| <i>Tlr9</i>          | toll-like receptor 9 [Source:MGI Symbol;Acc:MGI:1932389]                                                                              | 2.15 | 7.49E-03 |
| <i>Gm17586</i>       | predicted gene, 17586 [Source:MGI Symbol;Acc:MGI:4937220]                                                                             | 2.23 | 6.21E-04 |
| <i>Syng3</i>         | synaptogyrin 3 [Source:MGI Symbol;Acc:MGI:1341881]                                                                                    | 2.27 | 3.77E-02 |
| <i>9630013D21Rik</i> | RIKEN cDNA 9630013D21 gene [Source:MGI Symbol;Acc:MGI:2442649]                                                                        | 2.28 | 3.54E-02 |
| <i>Gm16299</i>       | predicted gene 16299 [Source:MGI Symbol;Acc:MGI:3826539]                                                                              | 2.29 | 3.45E-02 |
| <i>Penk</i>          | preproenkephalin [Source:MGI Symbol;Acc:MGI:104629]                                                                                   | 2.31 | 3.28E-02 |
| <i>AI607873</i>      | expressed sequence AI607873 [Source:MGI Symbol;Acc:MGI:2138302]                                                                       | 2.36 | 8.41E-03 |

|                  |                                                                                                                         |      |          |
|------------------|-------------------------------------------------------------------------------------------------------------------------|------|----------|
| <i>Gm14429</i>   | predicted gene 14429 [Source:MGI Symbol;Acc:MGI:3649510]                                                                | 2.42 | 1.43E-02 |
| <i>Gpr82</i>     | G protein-coupled receptor 82 [Source:MGI Symbol;Acc:MGI:2441734]                                                       | 2.45 | 1.75E-03 |
| <i>Csf2rb2</i>   | colony stimulating factor 2 receptor, beta 2, low-affinity (granulocyte-macrophage) [Source:MGI Symbol;Acc:MGI:1339760] | 2.72 | 2.46E-02 |
| <i>Cxcl10</i>    | chemokine (C-X-C motif) ligand 10 [Source:MGI Symbol;Acc:MGI:1352450]                                                   | 2.74 | 1.07E-02 |
| <i>Gm15354</i>   | predicted gene 15354 [Source:MGI Symbol;Acc:MGI:3705093]                                                                | 2.81 | 2.08E-02 |
| <i>Ighj3</i>     | immunoglobulin heavy joining 3 [Source:MGI Symbol;Acc:MGI:4439767]                                                      | 3.37 | 3.73E-02 |
| <i>Epha3</i>     | Eph receptor A3 [Source:MGI Symbol;Acc:MGI:99612]                                                                       | 3.66 | 2.52E-02 |
| <i>Nlrp1c-ps</i> | NLR family, pyrin domain containing 1C, pseudogene [Source:MGI Symbol;Acc:MGI:3582962]                                  | 3.82 | 8.47E-03 |
| <i>Snai3</i>     | snail family zinc finger 3 [Source:MGI Symbol;Acc:MGI:1353563]                                                          | 4.59 | 2.47E-04 |
| <i>Tsix</i>      | X (inactive)-specific transcript, opposite strand [Source:MGI Symbol;Acc:MGI:1336196]                                   | 7.85 | 1.05E-04 |
| <i>Gm26992</i>   | predicted gene, 26992 [Source:MGI Symbol;Acc:MGI:5504107]                                                               | 8.12 | 1.43E-04 |
| <i>Xist</i>      | inactive X specific transcripts [Source:MGI Symbol;Acc:MGI:98974]                                                       | 9.80 | 1.35E-05 |

Supplementary Table 5: Significantly altered genes in Treg cells. Red highlights Y-linked and X-chromosome-associated genes.

| Associated Gene Name | Description                                                                                                                                   | WT / cDKO Log2 Fold Change | p-value  |
|----------------------|-----------------------------------------------------------------------------------------------------------------------------------------------|----------------------------|----------|
| <i>Gm22072</i>       | predicted gene, 22072 [Source:MGI Symbol;Acc:MGI:5451849]                                                                                     | -15.63                     | 3.22E-02 |
| <i>Ddx3y</i>         | DEAD (Asp-Glu-Ala-Asp) box polypeptide 3, Y-linked [Source:MGI Symbol;Acc:MGI:1349406]                                                        | -11.24                     | 6.01E-05 |
| <i>Eif2s3y</i>       | eukaryotic translation initiation factor 2, subunit 3, structural gene Y-linked [Source:MGI Symbol;Acc:MGI:1349430]                           | -10.71                     | 1.13E-04 |
| <i>Kdm5d</i>         | lysine (K)-specific demethylase 5D [Source:MGI Symbol;Acc:MGI:99780]                                                                          | -10.52                     | 1.91E-04 |
| <i>Uty</i>           | ubiquitously transcribed tetratricopeptide repeat gene, Y chromosome [Source:MGI Symbol;Acc:MGI:894810]                                       | -8.47                      | 2.06E-04 |
| <i>Gm22677</i>       | predicted gene, 22677 [Source:MGI Symbol;Acc:MGI:5452454]                                                                                     | -5.79                      | 3.74E-02 |
| <i>Gm20407</i>       | predicted gene 20407 [Source:MGI Symbol;Acc:MGI:5141872]                                                                                      | -3.79                      | 6.57E-04 |
| <i>Aldh3a1</i>       | aldehyde dehydrogenase family 3, subfamily A1 [Source:MGI Symbol;Acc:MGI:1353451]                                                             | -3.19                      | 4.07E-02 |
| <i>Cd8a</i>          | CD8 antigen, alpha chain [Source:MGI Symbol;Acc:MGI:88346]                                                                                    | -3.12                      | 3.47E-02 |
| <i>Gm20732</i>       | predicted gene 20732 [Source:MGI Symbol;Acc:MGI:5318559]                                                                                      | -3.02                      | 4.39E-02 |
| <i>Gm22345</i>       | predicted gene, 22345 [Source:MGI Symbol;Acc:MGI:5452122]                                                                                     | -3.00                      | 4.34E-02 |
| <i>Gm22343</i>       | predicted gene, 22343 [Source:MGI Symbol;Acc:MGI:5452120]                                                                                     | -2.99                      | 3.13E-02 |
| <i>Olf1r172</i>      | olfactory receptor 172 [Source:MGI Symbol;Acc:MGI:3030006]                                                                                    | -2.93                      | 2.73E-02 |
| <i>Gm23692</i>       | predicted gene, 23692 [Source:MGI Symbol;Acc:MGI:5453469]                                                                                     | -2.88                      | 1.36E-02 |
| <i>Gm26064</i>       | predicted gene, 26064 [Source:MGI Symbol;Acc:MGI:5455841]                                                                                     | -2.82                      | 3.70E-05 |
| <i>Wnt10a</i>        | wingless-type MMTV integration site family, member 10A [Source:MGI Symbol;Acc:MGI:108071]                                                     | -2.68                      | 1.49E-02 |
| <i>Gm16998</i>       | predicted gene, 16998 [Source:MGI Symbol;Acc:MGI:4439922]                                                                                     | -2.65                      | 4.00E-03 |
| <i>2500002B13Rik</i> | RIKEN cDNA 2500002B13 gene [Source:MGI Symbol;Acc:MGI:1925603]                                                                                | -2.59                      | 6.46E-03 |
| <i>Gm12867</i>       | predicted gene 12867 [Source:MGI Symbol;Acc:MGI:3651003]                                                                                      | -2.58                      | 3.94E-03 |
| <i>Rapgef4os3</i>    | Rap guanine nucleotide exchange factor (GEF) 4, opposite strand 3 [Source:MGI Symbol;Acc:MGI:2442080]                                         | -2.56                      | 3.28E-03 |
| <i>Gm17025</i>       | predicted gene 17025 [Source:MGI Symbol;Acc:MGI:4937852]                                                                                      | -2.47                      | 1.66E-02 |
| <i>Gm16337</i>       | predicted gene 16337 [Source:MGI Symbol;Acc:MGI:3840131]                                                                                      | -2.39                      | 4.13E-02 |
| <i>Ppfa4</i>         | protein tyrosine phosphatase, receptor type, f polypeptide (PTPRF), interacting protein (liprin), alpha 4 [Source:MGI Symbol;Acc:MGI:1915757] | -2.37                      | 2.31E-02 |
| <i>Gm26606</i>       | predicted gene, 26606 [Source:MGI Symbol;Acc:MGI:5477100]                                                                                     | -2.31                      | 6.72E-03 |
| <i>Sox10</i>         | SRY (sex determining region Y)-box 10 [Source:MGI Symbol;Acc:MGI:98358]                                                                       | -2.29                      | 2.73E-02 |
| <i>Dusp18</i>        | dual specificity phosphatase 18 [Source:MGI Symbol;Acc:MGI:1922469]                                                                           | -2.28                      | 3.21E-02 |
| <i>Gm14097</i>       | predicted gene 14097 [Source:MGI Symbol;Acc:MGI:3651729]                                                                                      | -2.25                      | 3.84E-02 |
| <i>Ak5</i>           | adenylate kinase 5 [Source:MGI Symbol;Acc:MGI:2677491]                                                                                        | -2.21                      | 1.78E-02 |
| <i>Gm13703</i>       | predicted gene 13703 [Source:MGI Symbol;Acc:MGI:3651307]                                                                                      | -2.15                      | 4.38E-02 |
| <i>Gm14584</i>       | predicted gene 14584 [Source:MGI Symbol;Acc:MGI:3705780]                                                                                      | -2.14                      | 8.99E-03 |
| <i>Ecm2</i>          | extracellular matrix protein 2, female organ and adipocyte specific [Source:MGI Symbol;Acc:MGI:3039578]                                       | -2.13                      | 2.55E-02 |
| <i>Plaur</i>         | plasminogen activator, urokinase receptor [Source:MGI Symbol;Acc:MGI:97612]                                                                   | -2.10                      | 3.25E-02 |
| <i>Gm24299</i>       | predicted gene, 24299 [Source:MGI Symbol;Acc:MGI:5454076]                                                                                     | -2.01                      | 3.05E-02 |
| <i>Gm27022</i>       | predicted gene, 27022 [Source:MGI Symbol;Acc:MGI:5504137]                                                                                     | -1.99                      | 4.12E-02 |
| <i>Gm17364</i>       | predicted gene, 17364 [Source:MGI Symbol;Acc:MGI:4936998]                                                                                     | -1.97                      | 2.39E-02 |
| <i>Opn1sw</i>        | opsin 1 (cone pigments), short-wave-sensitive (color blindness, tritan) [Source:MGI Symbol;Acc:MGI:99438]                                     | -1.95                      | 2.05E-02 |
| <i>Lipf2</i>         | lipoyl(octanoyl) transferase 2 (putative) [Source:MGI Symbol;Acc:MGI:1914414]                                                                 | -1.93                      | 1.96E-02 |
| <i>Gm14124</i>       | predicted gene 14124 [Source:MGI Symbol;Acc:MGI:3652002]                                                                                      | -1.89                      | 1.73E-02 |
| <i>Gm22571</i>       | predicted gene, 22571 [Source:MGI Symbol;Acc:MGI:5452348]                                                                                     | -1.86                      | 8.33E-03 |
| <i>Hemgn</i>         | hemogen [Source:MGI Symbol;Acc:MGI:2136910]                                                                                                   | -1.81                      | 2.59E-02 |
| <i>Gm27006</i>       | predicted gene, 27006 [Source:MGI Symbol;Acc:MGI:5504121]                                                                                     | -1.80                      | 3.51E-02 |
| <i>Neurl2</i>        | neuronalized-like 2 (Drosophila) [Source:MGI Symbol;Acc:MGI:3043305]                                                                          | -1.79                      | 4.04E-02 |
| <i>Gm26830</i>       | predicted gene, 26830 [Source:MGI Symbol;Acc:MGI:5477324]                                                                                     | -1.76                      | 3.86E-02 |
| <i>Tmem44</i>        | transmembrane protein 44 [Source:MGI Symbol;Acc:MGI:1924489]                                                                                  | -1.74                      | 7.23E-03 |
| <i>Gm9776</i>        | predicted gene 9776 [Source:MGI Symbol;Acc:MGI:3641792]                                                                                       | -1.72                      | 1.30E-03 |
| <i>Gm23458</i>       | predicted gene, 23458 [Source:MGI Symbol;Acc:MGI:5453235]                                                                                     | -1.69                      | 3.79E-02 |
| <i>Npas1</i>         | neuronal PAS domain protein 1 [Source:MGI Symbol;Acc:MGI:109205]                                                                              | -1.63                      | 3.71E-02 |
| <i>Ppl</i>           | periplakin [Source:MGI Symbol;Acc:MGI:1194898]                                                                                                | -1.60                      | 4.01E-02 |
| <i>Gm26809</i>       | predicted gene, 26809 [Source:MGI Symbol;Acc:MGI:5477303]                                                                                     | -1.60                      | 3.32E-02 |
| <i>9130208D14Rik</i> | RIKEN cDNA 9130208D14 gene [Source:MGI Symbol;Acc:MGI:1924950]                                                                                | -1.54                      | 2.30E-02 |
| <i>Gm9522</i>        | predicted gene 9522 [Source:MGI Symbol;Acc:MGI:3779931]                                                                                       | -1.52                      | 7.78E-03 |
| <i>Zmynd10</i>       | zinc finger, MYND domain containing 10 [Source:MGI Symbol;Acc:MGI:2387863]                                                                    | -1.50                      | 1.99E-02 |
| <i>Cldn10</i>        | claudin 10 [Source:MGI Symbol;Acc:MGI:1913101]                                                                                                | -1.49                      | 3.98E-02 |

|                      |                                                                                                                                 |       |          |
|----------------------|---------------------------------------------------------------------------------------------------------------------------------|-------|----------|
| <i>Gm11946</i>       | predicted gene 11946 [Source:MGI Symbol;Acc:MGI:3650071]                                                                        | -1.49 | 4.57E-03 |
| <i>mt-Tq</i>         | mitochondrially encoded tRNA glutamine [Source:MGI Symbol;Acc:MGI:102477]                                                       | -1.48 | 1.32E-02 |
| <i>Srsf12</i>        | serine/arginine-rich splicing factor 12 [Source:MGI Symbol;Acc:MGI:2661424]                                                     | -1.46 | 1.51E-02 |
| <i>Dapk1</i>         | death associated protein kinase 1 [Source:MGI Symbol;Acc:MGI:1916885]                                                           | -1.46 | 3.87E-02 |
| <i>Gm7120</i>        | predicted gene 7120 [Source:MGI Symbol;Acc:MGI:3648543]                                                                         | -1.44 | 3.84E-02 |
| <i>Adhfe1</i>        | alcohol dehydrogenase, iron containing, 1 [Source:MGI Symbol;Acc:MGI:1923437]                                                   | -1.41 | 4.43E-03 |
| <i>Yam1</i>          | YY1 associated myogenesis RNA 1 [Source:MGI Symbol;Acc:MGI:5504039]                                                             | -1.36 | 1.45E-02 |
| <i>Trav16n</i>       | T cell receptor alpha variable 16n [Source:MGI Symbol;Acc:MGI:4439761]                                                          | -1.36 | 4.40E-03 |
| <i>Gm22275</i>       | predicted gene, 22275 [Source:MGI Symbol;Acc:MGI:5452052]                                                                       | -1.31 | 2.40E-02 |
| <i>Dnase1l2</i>      | deoxyribonuclease 1-like 2 [Source:MGI Symbol;Acc:MGI:1913955]                                                                  | -1.30 | 2.60E-02 |
| <i>Npff</i>          | neuropeptide FF-amide peptide precursor [Source:MGI Symbol;Acc:MGI:1891708]                                                     | -1.28 | 3.63E-02 |
| <i>Selp</i>          | selectin, platelet [Source:MGI Symbol;Acc:MGI:98280]                                                                            | -1.27 | 1.50E-03 |
| <i>Gm16066</i>       | predicted gene 16066 [Source:MGI Symbol;Acc:MGI:3801953]                                                                        | -1.26 | 1.60E-02 |
| <i>Gm12898</i>       | predicted gene 12898 [Source:MGI Symbol;Acc:MGI:3650325]                                                                        | -1.24 | 4.18E-02 |
| <i>Drc1</i>          | dynein regulatory complex subunit 1 [Source:MGI Symbol;Acc:MGI:2685906]                                                         | -1.24 | 9.00E-03 |
| <i>Slc25a29</i>      | solute carrier family 25 (mitochondrial carrier, palmitoylcarnitine transporter), member 29 [Source:MGI Symbol;Acc:MGI:2444911] | -1.23 | 1.89E-04 |
| <i>Snord68</i>       | small nucleolar RNA, C/D box 68 [Source:MGI Symbol;Acc:MGI:3819550]                                                             | -1.20 | 4.60E-02 |
| <i>Gstk1</i>         | glutathione S-transferase kappa 1 [Source:MGI Symbol;Acc:MGI:1923513]                                                           | -1.20 | 1.57E-02 |
| <i>Utp14b</i>        | UTP14, U3 small nucleolar ribonucleoprotein, homolog B (yeast) [Source:MGI Symbol;Acc:MGI:2445092]                              | -1.18 | 9.56E-03 |
| <i>Gdpd3</i>         | glycerophosphodiester phosphodiesterase domain containing 3 [Source:MGI Symbol;Acc:MGI:1915866]                                 | -1.17 | 4.11E-02 |
| <i>Ovgp1</i>         | oviductal glycoprotein 1 [Source:MGI Symbol;Acc:MGI:106661]                                                                     | -1.15 | 3.60E-03 |
| <i>Nlgn2</i>         | neuroligin 2 [Source:MGI Symbol;Acc:MGI:2681835]                                                                                | -1.14 | 4.59E-02 |
| <i>4930481B07Rik</i> | RIKEN cDNA 4930481B07 gene [Source:MGI Symbol;Acc:MGI:1922187]                                                                  | -1.14 | 1.58E-02 |
| <i>Gm7799</i>        | predicted gene 7799 [Source:MGI Symbol;Acc:MGI:3643378]                                                                         | -1.13 | 4.86E-02 |
| <i>Plxna1</i>        | plexin A1 [Source:MGI Symbol;Acc:MGI:107685]                                                                                    | -1.13 | 2.30E-02 |
| <i>Igfbp4</i>        | insulin-like growth factor binding protein 4 [Source:MGI Symbol;Acc:MGI:96439]                                                  | -1.11 | 1.00E-02 |
| <i>Trav8-2</i>       | T-cell receptor alpha variable 8-2 [Source:MGI Symbol;Acc:MGI:3650859]                                                          | -1.10 | 9.15E-03 |
| <i>Fbxo17</i>        | F-box protein 17 [Source:MGI Symbol;Acc:MGI:1354707]                                                                            | -1.08 | 4.07E-02 |
| <i>Cttna1</i>        | catenin (cadherin associated protein), alpha-like 1 [Source:MGI Symbol;Acc:MGI:1859649]                                         | -1.07 | 8.04E-03 |
| <i>Zfp608</i>        | zinc finger protein 608 [Source:MGI Symbol;Acc:MGI:2442338]                                                                     | -1.07 | 1.46E-02 |
| <i>Nexn</i>          | nexilin [Source:MGI Symbol;Acc:MGI:1916060]                                                                                     | -1.06 | 1.56E-02 |
| <i>Gm26931</i>       | predicted gene, 26931 [Source:MGI Symbol;Acc:MGI:5504046]                                                                       | -1.06 | 3.73E-02 |
| <i>Jam2</i>          | junction adhesion molecule 2 [Source:MGI Symbol;Acc:MGI:1933820]                                                                | -1.06 | 3.74E-04 |
| <i>Myh7b</i>         | myosin, heavy chain 7B, cardiac muscle, beta [Source:MGI Symbol;Acc:MGI:3710243]                                                | -1.05 | 3.88E-04 |
| <i>Gm6297</i>        | predicted gene 6297 [Source:MGI Symbol;Acc:MGI:3779584]                                                                         | -1.03 | 3.40E-02 |
| <i>Exog</i>          | endo/exonuclease (5'-3'), endonuclease G-like [Source:MGI Symbol;Acc:MGI:2143333]                                               | -1.03 | 4.63E-02 |
| <i>Npb</i>           | neuropeptide B [Source:MGI Symbol;Acc:MGI:2387153]                                                                              | -1.02 | 5.00E-02 |
| <i>Tmem91</i>        | transmembrane protein 91 [Source:MGI Symbol;Acc:MGI:2443589]                                                                    | -1.01 | 3.09E-02 |
| <i>Plekhh1</i>       | pleckstrin homology domain containing, family B (evectins) member 1 [Source:MGI Symbol;Acc:MGI:1351469]                         | -1.01 | 2.74E-03 |
| <i>Atp6v0d2</i>      | ATPase, H <sup>+</sup> transporting, lysosomal V0 subunit D2 [Source:MGI Symbol;Acc:MGI:1924415]                                | 1.00  | 7.43E-03 |
| <i>Pnk1</i>          | paroxysmal nonkinesigenic dyskinesia [Source:MGI Symbol;Acc:MGI:1930773]                                                        | 1.01  | 1.16E-02 |
| <i>Egr3</i>          | early growth response 3 [Source:MGI Symbol;Acc:MGI:1306780]                                                                     | 1.01  | 3.14E-02 |
| <i>Aurka</i>         | aurora kinase A [Source:MGI Symbol;Acc:MGI:894678]                                                                              | 1.01  | 6.05E-03 |
| <i>Lmtk3</i>         | lemur tyrosine kinase 3 [Source:MGI Symbol;Acc:MGI:3039582]                                                                     | 1.02  | 1.29E-02 |
| <i>Dkk1</i>          | dickkopf-like 1 [Source:MGI Symbol;Acc:MGI:1354963]                                                                             | 1.02  | 2.16E-02 |
| <i>Serpina3f</i>     | serine (or cysteine) peptidase inhibitor, clade A, member 3F [Source:MGI Symbol;Acc:MGI:2182838]                                | 1.06  | 9.85E-03 |
| <i>A630091E08Rik</i> | RIKEN cDNA A630091E08 gene [Source:MGI Symbol;Acc:MGI:2442837]                                                                  | 1.06  | 1.50E-02 |
| <i>Il3ra</i>         | interleukin 3 receptor, alpha chain [Source:MGI Symbol;Acc:MGI:96553]                                                           | 1.07  | 3.90E-02 |
| <i>Tstd3</i>         | thiosulfate sulfurtransferase (rhodanese)-like domain containing 3 [Source:MGI Symbol;Acc:MGI:1924282]                          | 1.07  | 9.38E-04 |
| <i>Nrbf2</i>         | nuclear receptor binding factor 2 [Source:MGI Symbol;Acc:MGI:1354950]                                                           | 1.08  | 1.80E-02 |
| <i>Serpinc1</i>      | serine (or cysteine) peptidase inhibitor, clade C (antithrombin), member 1 [Source:MGI Symbol;Acc:MGI:88095]                    | 1.09  | 3.65E-02 |
| <i>Lgals3</i>        | lectin, galactose binding, soluble 3 [Source:MGI Symbol;Acc:MGI:96778]                                                          | 1.10  | 1.04E-02 |
| <i>Gpr15</i>         | G protein-coupled receptor 15 [Source:MGI Symbol;Acc:MGI:1918473]                                                               | 1.10  | 8.37E-03 |
| <i>Gm24757</i>       | predicted gene, 24757 [Source:MGI Symbol;Acc:MGI:5454534]                                                                       | 1.11  | 1.96E-02 |
| <i>Lmntd2</i>        | lamin tail domain containing 2 [Source:MGI Symbol;Acc:MGI:1919250]                                                              | 1.11  | 4.26E-02 |
| <i>1810034E14Rik</i> | RIKEN cDNA 1810034E14 gene [Source:MGI Symbol;Acc:MGI:1913753]                                                                  | 1.11  | 4.92E-02 |

|                      |                                                                                                                     |      |          |
|----------------------|---------------------------------------------------------------------------------------------------------------------|------|----------|
| <i>Hist1h4k</i>      | histone cluster 1, H4k [Source:MGI Symbol;Acc:MGI:2448439]                                                          | 1.11 | 3.67E-02 |
| <i>Gm26035</i>       | predicted gene, 26035 [Source:MGI Symbol;Acc:MGI:5455812]                                                           | 1.11 | 5.29E-03 |
| <i>Pqlc1</i>         | PQ loop repeat containing 1 [Source:MGI Symbol;Acc:MGI:1914193]                                                     | 1.11 | 3.96E-02 |
| <i>Cpne5</i>         | copine V [Source:MGI Symbol;Acc:MGI:2385908]                                                                        | 1.11 | 2.16E-02 |
| <i>Rhob</i>          | ras homolog gene family, member B [Source:MGI Symbol;Acc:MGI:107949]                                                | 1.12 | 1.89E-02 |
| <i>Tg</i>            | thyroglobulin [Source:MGI Symbol;Acc:MGI:98733]                                                                     | 1.12 | 7.43E-03 |
| <i>Gm15444</i>       | predicted gene 15444 [Source:MGI Symbol;Acc:MGI:3705796]                                                            | 1.13 | 3.23E-02 |
| <i>Gm26592</i>       | predicted gene, 26592 [Source:MGI Symbol;Acc:MGI:5477086]                                                           | 1.14 | 3.51E-02 |
| <i>Mkl</i>           | mixed lineage kinase domain-like [Source:MGI Symbol;Acc:MGI:1921818]                                                | 1.15 | 4.33E-02 |
| <i>Mroh2a</i>        | maestro heat-like repeat family member 2A [Source:MGI Symbol;Acc:MGI:3705228]                                       | 1.16 | 2.36E-02 |
| <i>Gm17206</i>       | predicted gene 17206 [Source:MGI Symbol;Acc:MGI:4938033]                                                            | 1.16 | 2.28E-02 |
| <i>Gm16174</i>       | predicted gene 16174 [Source:MGI Symbol;Acc:MGI:3801857]                                                            | 1.16 | 1.05E-02 |
| <i>Sccpdh</i>        | saccharopine dehydrogenase (putative) [Source:MGI Symbol;Acc:MGI:1924486]                                           | 1.17 | 1.84E-02 |
| <i>Hist1h4f</i>      | histone cluster 1, H4f [Source:MGI Symbol;Acc:MGI:2448425]                                                          | 1.17 | 3.87E-02 |
| <i>Plekhg3</i>       | pleckstrin homology domain containing, family G (with RhoGef domain) member 3 [Source:MGI Symbol;Acc:MGI:2388284]   | 1.17 | 3.48E-02 |
| <i>Gm11491</i>       | predicted gene 11491 [Source:MGI Symbol;Acc:MGI:3651138]                                                            | 1.17 | 3.97E-02 |
| <i>Ube26</i>         | ubiquitin-conjugating enzyme E2L 6 [Source:MGI Symbol;Acc:MGI:1914500]                                              | 1.19 | 9.12E-03 |
| <i>Ms4a6d</i>        | membrane-spanning 4-domains, subfamily A, member 6D [Source:MGI Symbol;Acc:MGI:1916024]                             | 1.19 | 2.03E-02 |
| <i>Igf2bp3</i>       | insulin-like growth factor 2 mRNA binding protein 3 [Source:MGI Symbol;Acc:MGI:1890359]                             | 1.20 | 2.63E-02 |
| <i>Gm20507</i>       | predicted gene 20507 [Source:MGI Symbol;Acc:MGI:5141972]                                                            | 1.21 | 2.55E-02 |
| <i>Hist1h4c</i>      | histone cluster 1, H4c [Source:MGI Symbol;Acc:MGI:2448421]                                                          | 1.21 | 3.55E-02 |
| <i>Slc7a10</i>       | solute carrier family 7 (cationic amino acid transporter, y+ system), member 10 [Source:MGI Symbol;Acc:MGI:1858261] | 1.21 | 3.51E-03 |
| <i>Rel1</i>          | RELT-like 1 [Source:MGI Symbol;Acc:MGI:2140767]                                                                     | 1.21 | 3.00E-03 |
| <i>Egl-3</i>         | egl-9 family hypoxia-inducible factor 3 [Source:MGI Symbol;Acc:MGI:1932288]                                         | 1.21 | 3.57E-02 |
| <i>Nid2</i>          | nidogen 2 [Source:MGI Symbol;Acc:MGI:1298229]                                                                       | 1.22 | 2.43E-02 |
| <i>Sirpa</i>         | signal-regulatory protein alpha [Source:MGI Symbol;Acc:MGI:108563]                                                  | 1.22 | 4.94E-02 |
| <i>Il10</i>          | interleukin 10 [Source:MGI Symbol;Acc:MGI:96537]                                                                    | 1.22 | 1.64E-02 |
| <i>Ttc16</i>         | tetratricopeptide repeat domain 16 [Source:MGI Symbol;Acc:MGI:2443048]                                              | 1.23 | 5.85E-04 |
| <i>Gadd45a</i>       | growth arrest and DNA-damage-inducible 45 alpha [Source:MGI Symbol;Acc:MGI:107799]                                  | 1.23 | 1.99E-02 |
| <i>Lilrb4</i>        | leukocyte immunoglobulin-like receptor, subfamily B, member 4 [Source:MGI Symbol;Acc:MGI:102701]                    | 1.24 | 4.44E-03 |
| <i>Zfp300</i>        | zinc finger protein 300 [Source:MGI Symbol;Acc:MGI:3045326]                                                         | 1.24 | 3.66E-02 |
| <i>Penk</i>          | preproenkephalin [Source:MGI Symbol;Acc:MGI:104629]                                                                 | 1.26 | 2.00E-03 |
| <i>Artdc4</i>        | arrestin domain containing 4 [Source:MGI Symbol;Acc:MGI:1913662]                                                    | 1.28 | 3.72E-02 |
| <i>4930558J18Rik</i> | RIKEN cDNA 4930558J18 gene [Source:MGI Symbol;Acc:MGI:1922573]                                                      | 1.28 | 3.92E-02 |
| <i>Brf2</i>          | BRF2, subunit of RNA polymerase III transcription initiation factor, BRF1-like [Source:MGI Symbol;Acc:MGI:1913903]  | 1.28 | 8.00E-03 |
| <i>Trav4-4-dv10</i>  | T cell receptor alpha variable 4-4-DV10 [Source:MGI Symbol;Acc:MGI:3702138]                                         | 1.30 | 3.69E-02 |
| <i>Fam212b</i>       | family with sequence similarity 212, member B [Source:MGI Symbol;Acc:MGI:1923497]                                   | 1.30 | 2.35E-02 |
| <i>9230104M06Rik</i> | RIKEN cDNA 9230104M06 gene [Source:MGI Symbol;Acc:MGI:3642845]                                                      | 1.31 | 2.17E-03 |
| <i>1700066B19Rik</i> | RIKEN cDNA 1700066B19 gene [Source:MGI Symbol;Acc:MGI:1920699]                                                      | 1.31 | 4.33E-02 |
| <i>Ly6g5b</i>        | lymphocyte antigen 6 complex, locus G5B [Source:MGI Symbol;Acc:MGI:2385809]                                         | 1.31 | 4.42E-02 |
| <i>Fam160a1</i>      | family with sequence similarity 160, member A1 [Source:MGI Symbol;Acc:MGI:2444746]                                  | 1.32 | 1.18E-02 |
| <i>A530040E14Rik</i> | RIKEN cDNA A530040E14 gene [Source:MGI Symbol;Acc:MGI:3612703]                                                      | 1.32 | 1.02E-02 |
| <i>Coq7</i>          | demethyl-Q 7 [Source:MGI Symbol;Acc:MGI:107207]                                                                     | 1.32 | 1.99E-02 |
| <i>Prkra</i>         | protein kinase, interferon inducible double stranded RNA dependent activator [Source:MGI Symbol;Acc:MGI:1344375]    | 1.32 | 8.40E-03 |
| <i>Cd302</i>         | CD302 antigen [Source:MGI Symbol;Acc:MGI:1913455]                                                                   | 1.33 | 4.63E-02 |
| <i>Soat2</i>         | sterol O-acyltransferase 2 [Source:MGI Symbol;Acc:MGI:1332226]                                                      | 1.33 | 5.15E-03 |
| <i>Gm5812</i>        | predicted gene 5812 [Source:MGI Symbol;Acc:MGI:3644887]                                                             | 1.35 | 3.08E-02 |
| <i>Repin1</i>        | replication initiator 1 [Source:MGI Symbol;Acc:MGI:1889817]                                                         | 1.36 | 2.54E-03 |
| <i>Cnr1p1</i>        | cannabinoid receptor interacting protein 1 [Source:MGI Symbol;Acc:MGI:1917505]                                      | 1.37 | 4.28E-02 |
| <i>9130019P16Rik</i> | RIKEN cDNA 9130019P16 gene [Source:MGI Symbol;Acc:MGI:1918824]                                                      | 1.37 | 2.70E-02 |
| <i>Pparg</i>         | peroxisome proliferator activated receptor gamma [Source:MGI Symbol;Acc:MGI:97747]                                  | 1.37 | 2.84E-02 |
| <i>Marvel2</i>       | MARVEL (membrane-associating) domain containing 2 [Source:MGI Symbol;Acc:MGI:2446166]                               | 1.38 | 2.94E-03 |
| <i>Txlnb</i>         | taxilin beta [Source:MGI Symbol;Acc:MGI:2671945]                                                                    | 1.38 | 4.97E-02 |
| <i>Gm22973</i>       | predicted gene, 22973 [Source:MGI Symbol;Acc:MGI:5452750]                                                           | 1.40 | 3.73E-02 |
| <i>Gm16125</i>       | predicted gene 16125 [Source:MGI Symbol;Acc:MGI:3802000]                                                            | 1.40 | 4.74E-02 |
| <i>Ccl5</i>          | chemokine (C-C motif) ligand 5 [Source:MGI Symbol;Acc:MGI:98262]                                                    | 1.42 | 3.27E-02 |



|               |                                                                                                       |  |      |          |
|---------------|-------------------------------------------------------------------------------------------------------|--|------|----------|
| AA414768      | expressed sequence AA414768 [Source:MGI Symbol;Acc:MGI:3035137]                                       |  | 1.42 | 3.58E-02 |
| E130102H24Rik | RIKEN cDNA E130102H24 gene [Source:MGI Symbol;Acc:MGI:1925116]                                        |  | 1.43 | 3.40E-02 |
| Phox2a        | paired-like homeobox 2a [Source:MGI Symbol;Acc:MGI:106633]                                            |  | 1.43 | 2.83E-02 |
| Cutc          | cutC copper transporter homolog (E.coli) [Source:MGI Symbol;Acc:MGI:1913638]                          |  | 1.43 | 3.67E-02 |
| Extl1         | exostosins (multiple)-like 1 [Source:MGI Symbol;Acc:MGI:1888742]                                      |  | 1.43 | 8.88E-03 |
| Themis2       | thymocyte selection associated family member 2 [Source:MGI Symbol;Acc:MGI:2446213]                    |  | 1.43 | 3.03E-02 |
| Gm13032       | predicted gene 13032 [Source:MGI Symbol;Acc:MGI:3702685]                                              |  | 1.45 | 3.04E-02 |
| Gm12504       | predicted pseudogene 12504 [Source:MGI Symbol;Acc:MGI:3651567]                                        |  | 1.46 | 2.06E-02 |
| Kcna2         | potassium voltage-gated channel, shaker-related subfamily, member 2 [Source:MGI Symbol;Acc:MGI:96659] |  | 1.46 | 8.24E-03 |
| Fam221a       | family with sequence similarity 221, member A [Source:MGI Symbol;Acc:MGI:2442161]                     |  | 1.47 | 1.59E-02 |
| Gm26702       | predicted gene, 26702 [Source:MGI Symbol;Acc:MGI:5477196]                                             |  | 1.48 | 3.76E-02 |
| Pkn3          | protein kinase N3 [Source:MGI Symbol;Acc:MGI:2388285]                                                 |  | 1.48 | 1.53E-03 |
| Fam174b       | family with sequence similarity 174, member B [Source:MGI Symbol;Acc:MGI:3698178]                     |  | 1.48 | 4.64E-02 |
| Gm996         | predicted gene 996 [Source:MGI Symbol;Acc:MGI:2685842]                                                |  | 1.49 | 3.64E-02 |
| Hint2         | histidine triad nucleotide binding protein 2 [Source:MGI Symbol;Acc:MGI:1916167]                      |  | 1.50 | 2.04E-03 |
| Apbb1         | amyloid beta (A4) precursor protein-binding, family B, member 1 [Source:MGI Symbol;Acc:MGI:107765]    |  | 1.50 | 6.19E-03 |
| Fam81a        | family with sequence similarity 81, member A [Source:MGI Symbol;Acc:MGI:1924136]                      |  | 1.51 | 2.65E-02 |
| Gab3          | growth factor receptor bound protein 2-associated protein 3 [Source:MGI Symbol;Acc:MGI:2387324]       |  | 1.52 | 8.83E-03 |
| Noxo1         | NADPH oxidase organizer 1 [Source:MGI Symbol;Acc:MGI:1919143]                                         |  | 1.54 | 6.35E-03 |
| Emilin2       | elastin microfibril interfacier 2 [Source:MGI Symbol;Acc:MGI:2389136]                                 |  | 1.54 | 3.06E-02 |
| Oasl2         | 2'-5' oligoadenylate synthetase-like 2 [Source:MGI Symbol;Acc:MGI:1344390]                            |  | 1.54 | 1.30E-02 |
| Cnih2         | cornichon homolog 2 (Drosophila) [Source:MGI Symbol;Acc:MGI:1277225]                                  |  | 1.55 | 3.24E-02 |
| Pglyrp1       | peptidoglycan recognition protein 1 [Source:MGI Symbol;Acc:MGI:1345092]                               |  | 1.56 | 3.87E-02 |
| Pad1          | peptidyl arginine deiminase, type I [Source:MGI Symbol;Acc:MGI:1338893]                               |  | 1.57 | 4.72E-02 |
| Ajuba         | ajuba LIM protein [Source:MGI Symbol;Acc:MGI:1341886]                                                 |  | 1.58 | 4.37E-02 |
| Igfbp7        | insulin-like growth factor binding protein 7 [Source:MGI Symbol;Acc:MGI:1352480]                      |  | 1.58 | 3.73E-02 |
| Gm12743       | predicted gene 12743 [Source:MGI Symbol;Acc:MGI:3651449]                                              |  | 1.60 | 2.72E-03 |
| Traj48        | T cell receptor alpha joining 48 [Source:MGI Symbol;Acc:MGI:4439847]                                  |  | 1.61 | 1.19E-02 |
| Mrpl23        | mitochondrial ribosomal protein L23 [Source:MGI Symbol;Acc:MGI:1196612]                               |  | 1.61 | 9.06E-03 |
| Gm12517       | predicted gene 12517 [Source:MGI Symbol;Acc:MGI:3649535]                                              |  | 1.62 | 1.63E-02 |
| Tkt1          | transketolase-like 1 [Source:MGI Symbol;Acc:MGI:1933244]                                              |  | 1.65 | 5.17E-03 |
| Gm14455       | predicted gene 14455 [Source:MGI Symbol;Acc:MGI:3711286]                                              |  | 1.65 | 2.57E-02 |
| Map2          | microtubule-associated protein 2 [Source:MGI Symbol;Acc:MGI:97175]                                    |  | 1.65 | 4.22E-02 |
| Cxcl16        | chemokine (C-X-C motif) ligand 16 [Source:MGI Symbol;Acc:MGI:1932682]                                 |  | 1.68 | 4.42E-02 |
| Lipo1         | lipase, member O1 [Source:MGI Symbol;Acc:MGI:2147592]                                                 |  | 1.68 | 2.04E-02 |
| Scn11a        | sodium channel, voltage-gated, type XI, alpha [Source:MGI Symbol;Acc:MGI:1345149]                     |  | 1.68 | 3.64E-02 |
| Smpd13b       | sphingomyelin phosphodiesterase, acid-like 3B [Source:MGI Symbol;Acc:MGI:1916022]                     |  | 1.69 | 1.56E-02 |
| Lrrd1         | leucine rich repeats and death domain containing 1 [Source:MGI Symbol;Acc:MGI:3045299]                |  | 1.71 | 3.31E-02 |
| Gm15455       | predicted gene 15455 [Source:MGI Symbol;Acc:MGI:3705563]                                              |  | 1.77 | 4.19E-02 |
| 1700048O20Rik | RIKEN cDNA 1700048O20 gene [Source:MGI Symbol;Acc:MGI:1920637]                                        |  | 1.79 | 4.79E-02 |
| Serpinf1      | serine (or cysteine) peptidase inhibitor, clade F, member 1 [Source:MGI Symbol;Acc:MGI:108080]        |  | 1.79 | 4.55E-02 |
| Cxx1c         | CAAX box 1C [Source:MGI Symbol;Acc:MGI:1920115]                                                       |  | 1.81 | 2.91E-02 |
| 2310010J17Rik | RIKEN cDNA 2310010J17 gene [Source:MGI Symbol;Acc:MGI:1925579]                                        |  | 1.83 | 2.10E-02 |
| Faddos        | Fas (TNFRSF6)-associated via death domain, opposite strand [Source:MGI Symbol;Acc:MGI:3642460]        |  | 1.83 | 4.89E-03 |
| Sord          | sorbitol dehydrogenase [Source:MGI Symbol;Acc:MGI:98266]                                              |  | 1.84 | 2.58E-03 |
| Stxbp1        | syntaxin binding protein 1 [Source:MGI Symbol;Acc:MGI:107363]                                         |  | 1.84 | 4.71E-02 |
| Rad51c        | RAD51 homolog C [Source:MGI Symbol;Acc:MGI:2150020]                                                   |  | 1.85 | 3.76E-02 |
| Gm22748       | predicted gene, 22748 [Source:MGI Symbol;Acc:MGI:5452525]                                             |  | 1.89 | 1.84E-02 |
| Rps23         | ribosomal protein S23 [Source:MGI Symbol;Acc:MGI:1913725]                                             |  | 1.91 | 2.11E-02 |
| Gm14176       | predicted gene 14176 [Source:MGI Symbol;Acc:MGI:3650021]                                              |  | 1.93 | 3.21E-02 |
| Ptafr         | platelet-activating factor receptor [Source:MGI Symbol;Acc:MGI:106066]                                |  | 1.94 | 1.07E-02 |
| Pgpep1        | pyroglutamyl-peptidase I [Source:MGI Symbol;Acc:MGI:1913772]                                          |  | 1.94 | 2.86E-02 |
| Gm13776       | predicted gene 13776 [Source:MGI Symbol;Acc:MGI:3650154]                                              |  | 1.97 | 9.80E-03 |
| Gm11223       | predicted gene 11223 [Source:MGI Symbol;Acc:MGI:3651631]                                              |  | 1.97 | 5.56E-05 |
| Gm13216       | predicted gene 13216 [Source:MGI Symbol;Acc:MGI:3651709]                                              |  | 1.98 | 3.77E-02 |
| A830005F24Rik | RIKEN cDNA A830005F24 gene [Source:MGI Symbol;Acc:MGI:3045249]                                        |  | 1.98 | 1.34E-02 |

|                      |                                                                                              |      |          |
|----------------------|----------------------------------------------------------------------------------------------|------|----------|
| <i>Gm13680</i>       | predicted gene 13680 [Source:MGI Symbol;Acc:MGI:3652285]                                     | 1.98 | 3.61E-02 |
| <i>Mcc</i>           | mutated in colorectal cancers [Source:MGI Symbol;Acc:MGI:96930]                              | 2.00 | 2.29E-02 |
| <i>H2-DMb2</i>       | histocompatibility 2, class II, locus Mb2 [Source:MGI Symbol;Acc:MGI:95923]                  | 2.01 | 1.86E-02 |
| <i>Gm16702</i>       | predicted gene, 16702 [Source:MGI Symbol;Acc:MGI:4439626]                                    | 2.01 | 9.54E-03 |
| <i>Nqo1</i>          | NAD(P)H dehydrogenase, quinone 1 [Source:MGI Symbol;Acc:MGI:103187]                          | 2.01 | 3.79E-02 |
| <i>Gm13561</i>       | predicted gene 13561 [Source:MGI Symbol;Acc:MGI:3651674]                                     | 2.03 | 2.00E-02 |
| <i>2210011C24Rik</i> | RIKEN cDNA 2210011C24 gene [Source:MGI Symbol;Acc:MGI:1917384]                               | 2.04 | 2.99E-02 |
| <i>Zfp69</i>         | zinc finger protein 69 [Source:MGI Symbol;Acc:MGI:107794]                                    | 2.06 | 1.31E-02 |
| <i>Thns12</i>        | threonine synthase-like 2 (bacterial) [Source:MGI Symbol;Acc:MGI:3041254]                    | 2.06 | 2.26E-02 |
| <i>Clip3</i>         | CAP-GLY domain containing linker protein 3 [Source:MGI Symbol;Acc:MGI:1923936]               | 2.06 | 4.68E-02 |
| <i>Pdzd7</i>         | PDZ domain containing 7 [Source:MGI Symbol;Acc:MGI:3608325]                                  | 2.07 | 8.51E-03 |
| <i>Gm9958</i>        | predicted gene 9958 [Source:MGI Symbol;Acc:MGI:3641866]                                      | 2.08 | 3.50E-02 |
| <i>Gm11531</i>       | predicted gene 11531 [Source:MGI Symbol;Acc:MGI:3650260]                                     | 2.08 | 7.93E-04 |
| <i>Gm24134</i>       | predicted gene, 24134 [Source:MGI Symbol;Acc:MGI:5453911]                                    | 2.13 | 2.17E-02 |
| <i>Gm6158</i>        | predicted gene 6158 [Source:MGI Symbol;Acc:MGI:3779562]                                      | 2.13 | 3.41E-02 |
| <i>Ankmy1</i>        | ankyrin repeat and MYND domain containing 1 [Source:MGI Symbol;Acc:MGI:3045261]              | 2.15 | 4.99E-02 |
| <i>Rab11fip5</i>     | RAB11 family interacting protein 5 (class I) [Source:MGI Symbol;Acc:MGI:1098586]             | 2.16 | 1.44E-03 |
| <i>A830012C17Rik</i> | RIKEN cDNA A830012C17 gene [Source:MGI Symbol;Acc:MGI:2441830]                               | 2.16 | 2.49E-02 |
| <i>Gp49a</i>         | glycoprotein 49 A [Source:MGI Symbol;Acc:MGI:102702]                                         | 2.18 | 1.28E-02 |
| <i>Tbc1d9</i>        | TBC1 domain family, member 9 [Source:MGI Symbol;Acc:MGI:1918560]                             | 2.21 | 3.77E-02 |
| <i>Gm25744</i>       | predicted gene, 25744 [Source:MGI Symbol;Acc:MGI:5455521]                                    | 2.21 | 1.89E-03 |
| <i>Tuba8</i>         | tubulin, alpha 8 [Source:MGI Symbol;Acc:MGI:1858225]                                         | 2.22 | 2.46E-02 |
| <i>C3</i>            | complement component 3 [Source:MGI Symbol;Acc:MGI:88227]                                     | 2.23 | 2.94E-02 |
| <i>Ttl11</i>         | tubulin tyrosine ligase-like family, member 11 [Source:MGI Symbol;Acc:MGI:1921660]           | 2.24 | 3.57E-02 |
| <i>Firre</i>         | functional intergenic repeating RNA element [Source:MGI Symbol;Acc:MGI:2147989]              | 2.29 | 1.81E-02 |
| <i>Hyal3</i>         | hyaluronoglucosaminidase 3 [Source:MGI Symbol;Acc:MGI:1330288]                               | 2.31 | 1.06E-02 |
| <i>Cfap53</i>        | cilia and flagella associated protein 53 [Source:MGI Symbol;Acc:MGI:1921703]                 | 2.32 | 3.77E-02 |
| <i>Dnah9</i>         | dynein, axonemal, heavy chain 9 [Source:MGI Symbol;Acc:MGI:1289279]                          | 2.34 | 4.85E-02 |
| <i>Ifftm3</i>        | interferon induced transmembrane protein 3 [Source:MGI Symbol;Acc:MGI:1913391]               | 2.35 | 1.98E-02 |
| <i>B9d1</i>          | B9 protein domain 1 [Source:MGI Symbol;Acc:MGI:1351471]                                      | 2.35 | 5.75E-03 |
| <i>Fibcd1</i>        | fibrinogen C domain containing 1 [Source:MGI Symbol;Acc:MGI:2138953]                         | 2.36 | 2.17E-02 |
| <i>Zfp112</i>        | zinc finger protein 112 [Source:MGI Symbol;Acc:MGI:1929115]                                  | 2.36 | 4.78E-03 |
| <i>Col27a1</i>       | collagen, type XXVII, alpha 1 [Source:MGI Symbol;Acc:MGI:2672118]                            | 2.37 | 4.63E-03 |
| <i>Pycr1</i>         | pyrroline-5-carboxylate reductase 1 [Source:MGI Symbol;Acc:MGI:2384795]                      | 2.37 | 1.62E-02 |
| <i>Mnda</i>          | myeloid cell nuclear differentiation antigen [Source:MGI Symbol;Acc:MGI:3041120]             | 2.38 | 2.60E-02 |
| <i>1700007J10Rik</i> | RIKEN cDNA 1700007J10 gene [Source:MGI Symbol;Acc:MGI:1916570]                               | 2.40 | 3.60E-02 |
| <i>Dnajc12</i>       | DnaJ (Hsp40) homolog, subfamily C, member 12 [Source:MGI Symbol;Acc:MGI:1353428]             | 2.42 | 1.79E-02 |
| <i>Ccr1</i>          | chemokine (C-C motif) receptor 1 [Source:MGI Symbol;Acc:MGI:104618]                          | 2.44 | 9.25E-03 |
| <i>Rdh1</i>          | retinol dehydrogenase 1 (all trans) [Source:MGI Symbol;Acc:MGI:1195275]                      | 2.46 | 3.46E-02 |
| <i>Ltbp4</i>         | latent transforming growth factor beta binding protein 4 [Source:MGI Symbol;Acc:MGI:1321395] | 2.46 | 2.74E-02 |
| <i>5430427O19Rik</i> | RIKEN cDNA 5430427O19 gene [Source:MGI Symbol;Acc:MGI:1918648]                               | 2.47 | 2.80E-02 |
| <i>Gm26534</i>       | predicted gene, 26534 [Source:MGI Symbol;Acc:MGI:5477028]                                    | 2.53 | 3.61E-02 |
| <i>Syce1l</i>        | synaptonemal complex central element protein 1 like [Source:MGI Symbol;Acc:MGI:1922247]      | 2.53 | 1.31E-02 |
| <i>Ninl</i>          | ninein-like [Source:MGI Symbol;Acc:MGI:1925427]                                              | 2.53 | 2.12E-02 |
| <i>Nlrp1a</i>        | NLR family, pyrin domain containing 1A [Source:MGI Symbol;Acc:MGI:2684861]                   | 2.53 | 3.53E-02 |
| <i>Grin2d</i>        | glutamate receptor, ionotropic, NMDA2D (epsilon 4) [Source:MGI Symbol;Acc:MGI:95823]         | 2.64 | 6.35E-03 |
| <i>Zscan18</i>       | zinc finger and SCAN domain containing 18 [Source:MGI Symbol;Acc:MGI:3643810]                | 2.76 | 3.84E-02 |
| <i>A630081J09Rik</i> | RIKEN cDNA A630081J09 gene [Source:MGI Symbol;Acc:MGI:3588263]                               | 2.82 | 1.71E-02 |
| <i>4932702P03Rik</i> | RIKEN cDNA 4932702P03 gene [Source:MGI Symbol;Acc:MGI:1921673]                               | 2.83 | 7.49E-03 |
| <i>Snord49b</i>      | small nucleolar RNA, C/D box 49B [Source:MGI Symbol;Acc:MGI:3819539]                         | 2.85 | 9.87E-05 |
| <i>Ramp3</i>         | receptor (calcitonin) activity modifying protein 3 [Source:MGI Symbol;Acc:MGI:1860292]       | 2.88 | 1.19E-02 |
| <i>D630029K05Rik</i> | RIKEN cDNA D630029K05 gene [Source:MGI Symbol;Acc:MGI:2143561]                               | 2.88 | 8.55E-03 |
| <i>Nmrk2</i>         | nicotinamide riboside kinase 2 [Source:MGI Symbol;Acc:MGI:1916814]                           | 2.93 | 4.68E-02 |
| <i>Gm17207</i>       | predicted gene 17207 [Source:MGI Symbol;Acc:MGI:4938034]                                     | 2.93 | 1.15E-02 |
| <i>Gm5533</i>        | predicted gene 5533 [Source:MGI Symbol;Acc:MGI:3647595]                                      | 2.94 | 4.82E-03 |
| <i>Fam213b</i>       | family with sequence similarity 213, member B [Source:MGI Symbol;Acc:MGI:1913719]            | 2.95 | 6.79E-03 |

|                      |                                                                                                                                   |      |          |
|----------------------|-----------------------------------------------------------------------------------------------------------------------------------|------|----------|
| <i>Tmem51</i>        | transmembrane protein 51 [Source:MGI Symbol;Acc:MGI:2384874]                                                                      | 2.97 | 3.63E-02 |
| <i>2210408121Rik</i> | RIKEN cDNA 2210408121 gene [Source:MGI Symbol;Acc:MGI:1919621]                                                                    | 2.97 | 8.34E-03 |
| <i>Cdh15</i>         | cadherin 15 [Source:MGI Symbol;Acc:MGI:106672]                                                                                    | 3.00 | 4.74E-02 |
| <i>Fgfbp3</i>        | fibroblast growth factor binding protein 3 [Source:MGI Symbol;Acc:MGI:1919764]                                                    | 3.01 | 8.42E-03 |
| <i>Apol9a</i>        | apolipoprotein L 9a [Source:MGI Symbol;Acc:MGI:3606001]                                                                           | 3.03 | 2.58E-02 |
| <i>Tmem17</i>        | transmembrane protein 17 [Source:MGI Symbol;Acc:MGI:2144205]                                                                      | 3.04 | 1.91E-02 |
| <i>Fam3b</i>         | family with sequence similarity 3, member B [Source:MGI Symbol;Acc:MGI:1270150]                                                   | 3.07 | 3.68E-02 |
| <i>Chn1os3</i>       | chimerin 1, opposite strand 3 [Source:MGI Symbol;Acc:MGI:3705094]                                                                 | 3.19 | 4.60E-02 |
| <i>BC100451</i>      | cDNA sequence BC100451 [Source:MGI Symbol;Acc:MGI:1929713]                                                                        | 3.21 | 3.74E-02 |
| <i>Trav7d-4</i>      | T cell receptor alpha variable 7D-4 [Source:MGI Symbol;Acc:MGI:3651273]                                                           | 3.31 | 2.01E-02 |
| <i>Gm14320</i>       | predicted gene 14320 [Source:MGI Symbol;Acc:MGI:3649455]                                                                          | 3.32 | 2.59E-02 |
| <i>Gm25767</i>       | predicted gene, 25767 [Source:MGI Symbol;Acc:MGI:5455544]                                                                         | 3.32 | 2.72E-02 |
| <i>Gm11839</i>       | predicted gene 11839 [Source:MGI Symbol;Acc:MGI:3651162]                                                                          | 3.37 | 3.24E-02 |
| <i>Tmprss11e</i>     | transmembrane protease, serine 11e [Source:MGI Symbol;Acc:MGI:3513175]                                                            | 3.39 | 1.01E-02 |
| <i>Kcnj10</i>        | potassium inwardly-rectifying channel, subfamily J, member 10 [Source:MGI Symbol;Acc:MGI:1194504]                                 | 3.39 | 4.42E-02 |
| <i>Lctf</i>          | lactase-like [Source:MGI Symbol;Acc:MGI:2183549]                                                                                  | 3.44 | 3.52E-03 |
| <i>Srp54b</i>        | signal recognition particle 54B [Source:MGI Symbol;Acc:MGI:3714357]                                                               | 3.45 | 9.58E-03 |
| <i>Mrv1</i>          | MRV integration site 1 [Source:MGI Symbol;Acc:MGI:1338023]                                                                        | 3.45 | 7.78E-03 |
| <i>1700055D18Rik</i> | RIKEN cDNA 1700055D18 gene [Source:MGI Symbol;Acc:MGI:1920655]                                                                    | 3.48 | 5.63E-03 |
| <i>Ugt1a6a</i>       | UDP glucuronosyltransferase 1 family, polypeptide A6A [Source:MGI Symbol;Acc:MGI:2137698]                                         | 3.49 | 2.40E-02 |
| <i>Gm22504</i>       | predicted gene, 22504 [Source:MGI Symbol;Acc:MGI:5452281]                                                                         | 3.59 | 4.05E-02 |
| <i>2900041M22Rik</i> | RIKEN cDNA 2900041M22 gene [Source:MGI Symbol;Acc:MGI:1925653]                                                                    | 3.63 | 8.76E-03 |
| <i>Gm26347</i>       | predicted gene, 26347 [Source:MGI Symbol;Acc:MGI:5456124]                                                                         | 3.64 | 2.87E-03 |
| <i>Gm22516</i>       | predicted gene, 22516 [Source:MGI Symbol;Acc:MGI:5452293]                                                                         | 3.67 | 3.14E-02 |
| <i>Chn1</i>          | chimerin 1 [Source:MGI Symbol;Acc:MGI:1915674]                                                                                    | 3.68 | 4.02E-02 |
| <i>Cntn2</i>         | contactin 2 [Source:MGI Symbol;Acc:MGI:104518]                                                                                    | 3.69 | 7.75E-03 |
| <i>Rcn3</i>          | reticulocalbin 3, EF-hand calcium binding domain [Source:MGI Symbol;Acc:MGI:1277122]                                              | 3.69 | 2.29E-03 |
| <i>Gm26521</i>       | predicted gene, 26521 [Source:MGI Symbol;Acc:MGI:5477015]                                                                         | 3.72 | 2.05E-02 |
| <i>Trav13-4-dv7</i>  | T cell receptor alpha variable 13-4-DV7 [Source:MGI Symbol;Acc:MGI:3702151]                                                       | 3.78 | 4.13E-03 |
| <i>Gm5939</i>        | predicted pseudogene 5939 [Source:MGI Symbol;Acc:MGI:3648845]                                                                     | 3.78 | 1.08E-02 |
| <i>Traj54</i>        | T cell receptor alpha joining 54 [Source:MGI Symbol;Acc:MGI:4937113]                                                              | 3.83 | 2.75E-02 |
| <i>March1</i>        | membrane-associated ring finger (C3HC4) 1 [Source:MGI Symbol;Acc:MGI:1920175]                                                     | 3.88 | 2.14E-02 |
| <i>Slc46a1</i>       | solute carrier family 46, member 1 [Source:MGI Symbol;Acc:MGI:1098733]                                                            | 3.91 | 1.20E-02 |
| <i>Arhgap33</i>      | Rho GTPase activating protein 33 [Source:MGI Symbol;Acc:MGI:2673998]                                                              | 3.97 | 3.63E-04 |
| <i>Lpin3</i>         | lipin 3 [Source:MGI Symbol;Acc:MGI:1891342]                                                                                       | 3.97 | 6.40E-04 |
| <i>Adamts17</i>      | a disintegrin-like and metallopeptidase (repolysin type) with thrombospondin type 1 motif, 17 [Source:MGI Symbol;Acc:MGI:3588195] | 4.04 | 2.24E-02 |
| <i>Rgs8</i>          | regulator of G-protein signaling 8 [Source:MGI Symbol;Acc:MGI:108408]                                                             | 4.06 | 1.44E-02 |
| <i>Stab2</i>         | stabilin 2 [Source:MGI Symbol;Acc:MGI:2178743]                                                                                    | 4.09 | 2.45E-02 |
| <i>Gm13940</i>       | predicted gene 13940 [Source:MGI Symbol;Acc:MGI:3650117]                                                                          | 4.16 | 4.20E-02 |
| <i>Mir5107</i>       | microRNA 5107 [Source:MGI Symbol;Acc:MGI:4950427]                                                                                 | 4.16 | 1.69E-03 |
| <i>Snai3</i>         | snail family zinc finger 3 [Source:MGI Symbol;Acc:MGI:1353563]                                                                    | 4.18 | 4.80E-03 |
| <i>Gzma</i>          | granzyme A [Source:MGI Symbol;Acc:MGI:109266]                                                                                     | 4.24 | 1.81E-02 |
| <i>Dnal1</i>         | dynein, axonemal, light chain 1 [Source:MGI Symbol;Acc:MGI:1921462]                                                               | 4.26 | 2.18E-03 |
| <i>Snord52</i>       | small nucleolar RNA, C/D box 52 [Source:MGI Symbol;Acc:MGI:3819541]                                                               | 4.35 | 1.68E-02 |
| <i>Zmynd15</i>       | zinc finger, MYND-type containing 15 [Source:MGI Symbol;Acc:MGI:3603821]                                                          | 4.36 | 4.85E-02 |
| <i>Gm17538</i>       | predicted gene, 17538 [Source:MGI Symbol;Acc:MGI:4937172]                                                                         | 4.51 | 4.66E-02 |
| <i>Gm15466</i>       | predicted gene 15466 [Source:MGI Symbol;Acc:MGI:3705491]                                                                          | 4.57 | 4.79E-02 |
| <i>Vwa1</i>          | von Willebrand factor A domain containing 1 [Source:MGI Symbol;Acc:MGI:2179729]                                                   | 4.59 | 3.46E-02 |
| <i>Gm22596</i>       | predicted gene, 22596 [Source:MGI Symbol;Acc:MGI:5452373]                                                                         | 4.68 | 5.71E-03 |
| <i>Nbea</i>          | neurobeachin [Source:MGI Symbol;Acc:MGI:1347075]                                                                                  | 4.70 | 1.08E-03 |
| <i>Slc24a1</i>       | solute carrier family 24 (sodium/potassium/calcium exchanger), member 1 [Source:MGI Symbol;Acc:MGI:2384871]                       | 4.75 | 3.64E-03 |
| <i>A930016O22Rik</i> | RIKEN cDNA A930016O22 gene [Source:MGI Symbol;Acc:MGI:3605623]                                                                    | 4.87 | 4.65E-02 |
| <i>1700041G16Rik</i> | RIKEN cDNA 1700041G16 gene [Source:MGI Symbol;Acc:MGI:1920549]                                                                    | 4.98 | 3.05E-02 |
| <i>Wsb2-ps</i>       | WD repeat and SOCS box-containing 2, pseudogene [Source:MGI Symbol;Acc:MGI:3649891]                                               | 5.03 | 7.66E-03 |
| <i>Cables1</i>       | CDK5 and Abl enzyme substrate 1 [Source:MGI Symbol;Acc:MGI:1927065]                                                               | 5.06 | 1.78E-02 |
| <i>Mdm4-ps</i>       | transformed mouse 3T3 cell double minute 4, pseudogene [Source:MGI Symbol;Acc:MGI:2136991]                                        | 5.11 | 1.82E-02 |

|                      |                                                                                                                                             |             |                 |
|----------------------|---------------------------------------------------------------------------------------------------------------------------------------------|-------------|-----------------|
| <i>Tspear</i>        | thrombospondin type laminin G domain and EAR repeats [Source:MGI Symbol;Acc:MGI:2671932]                                                    | 5.39        | 4.20E-02        |
| <i>Catsperd</i>      | catsper channel auxiliary subunit delta [Source:MGI Symbol;Acc:MGI:2147030]                                                                 | 5.95        | 1.17E-02        |
| <i>Gm5127</i>        | predicted gene 5127 [Source:MGI Symbol;Acc:MGI:3648285]                                                                                     | 6.40        | 8.18E-04        |
| <i>Tsix</i>          | <b>X (inactive)-specific transcript, opposite strand [Source:MGI Symbol;Acc:MGI:1336196]</b>                                                | <b>7.15</b> | <b>3.05E-04</b> |
| <i>Xist</i>          | <b>inactive X specific transcripts [Source:MGI Symbol;Acc:MGI:98974]</b>                                                                    | <b>8.08</b> | <b>2.42E-03</b> |
| <i>Cecr2</i>         | cat eye syndrome chromosome region, candidate 2 [Source:MGI Symbol;Acc:MGI:1923799]                                                         | 9.02        | 3.40E-02        |
| <i>Dmd</i>           | dystrophin, muscular dystrophy [Source:MGI Symbol;Acc:MGI:94909]                                                                            | 9.14        | 2.38E-02        |
| <i>Agap1</i>         | ArfGAP with GTPase domain, ankyrin repeat and PH domain 1 [Source:MGI Symbol;Acc:MGI:2653690]                                               | 9.27        | 4.96E-02        |
| <i>Lhfp12</i>        | lipoma HMGIC fusion partner-like 2 [Source:MGI Symbol;Acc:MGI:2145236]                                                                      | 9.38        | 2.83E-02        |
| <i>Samd4</i>         | sterile alpha motif domain containing 4 [Source:MGI Symbol;Acc:MGI:1921730]                                                                 | 9.46        | 2.22E-03        |
| <i>Glis3</i>         | GLIS family zinc finger 3 [Source:MGI Symbol;Acc:MGI:2444289]                                                                               | 9.60        | 3.03E-02        |
| <i>Myh11</i>         | myosin, heavy polypeptide 11, smooth muscle [Source:MGI Symbol;Acc:MGI:102643]                                                              | 9.92        | 1.28E-02        |
| <i>Cbln3</i>         | cerebellin 3 precursor protein [Source:MGI Symbol;Acc:MGI:1889286]                                                                          | 9.93        | 3.71E-02        |
| <i>Klhl29</i>        | kelch-like 29 [Source:MGI Symbol;Acc:MGI:2683857]                                                                                           | 10.14       | 2.25E-02        |
| <i>Al838599</i>      | expressed sequence Al838599 [Source:MGI Symbol;Acc:MGI:3510989]                                                                             | 10.17       | 1.29E-03        |
| <i>Cdh17</i>         | cadherin 17 [Source:MGI Symbol;Acc:MGI:1095414]                                                                                             | 10.17       | 2.29E-02        |
| <i>Hsf5</i>          | heat shock transcription factor family member 5 [Source:MGI Symbol;Acc:MGI:2685585]                                                         | 10.25       | 1.86E-02        |
| <i>Asap3</i>         | ArfGAP with SH3 domain, ankyrin repeat and PH domain 3 [Source:MGI Symbol;Acc:MGI:2684986]                                                  | 10.33       | 4.56E-02        |
| <i>Myom1</i>         | myomesin 1 [Source:MGI Symbol;Acc:MGI:1341430]                                                                                              | 10.37       | 4.77E-02        |
| <i>Bcar1</i>         | breast cancer anti-estrogen resistance 1 [Source:MGI Symbol;Acc:MGI:108091]                                                                 | 10.41       | 4.90E-02        |
| <i>Gm16425</i>       | predicted gene 16425 [Source:MGI Symbol;Acc:MGI:3643338]                                                                                    | 10.53       | 3.87E-02        |
| <i>Dact3</i>         | dapper homolog 3, antagonist of beta-catenin (xenopus) [Source:MGI Symbol;Acc:MGI:3654828]                                                  | 10.84       | 3.97E-02        |
| <i>Samd13</i>        | sterile alpha motif domain containing 13 [Source:MGI Symbol;Acc:MGI:2686498]                                                                | 10.96       | 2.87E-02        |
| <i>Entpd3</i>        | ectonucleoside triphosphate diphosphohydrolase 3 [Source:MGI Symbol;Acc:MGI:1321386]                                                        | 11.05       | 3.35E-02        |
| <i>Cpt1c</i>         | carnitine palmitoyltransferase 1c [Source:MGI Symbol;Acc:MGI:2446526]                                                                       | 11.14       | 2.41E-02        |
| <i>Serpine1</i>      | serine (or cysteine) peptidase inhibitor, clade E, member 1 [Source:MGI Symbol;Acc:MGI:97608]                                               | 11.18       | 1.20E-02        |
| <i>Scd4</i>          | stearoyl-coenzyme A desaturase 4 [Source:MGI Symbol;Acc:MGI:2670997]                                                                        | 11.43       | 8.45E-03        |
| <i>Adcy4</i>         | adenylate cyclase 4 [Source:MGI Symbol;Acc:MGI:99674]                                                                                       | 11.53       | 1.72E-02        |
| <i>Gm10575</i>       | predicted gene 10575 [Source:MGI Symbol;Acc:MGI:3708765]                                                                                    | 11.53       | 2.14E-02        |
| <i>Hck</i>           | hemopoietic cell kinase [Source:MGI Symbol;Acc:MGI:96052]                                                                                   | 11.63       | 1.27E-03        |
| <i>Gm15614</i>       | predicted gene 15614 [Source:MGI Symbol;Acc:MGI:3783059]                                                                                    | 11.70       | 4.15E-02        |
| <i>Chrg</i>          | cholinergic receptor, nicotinic, gamma polypeptide [Source:MGI Symbol;Acc:MGI:87895]                                                        | 11.80       | 2.40E-02        |
| <i>AK157302</i>      | cDNA sequence AK157302 [Source:MGI Symbol;Acc:MGI:3574096]                                                                                  | 11.82       | 3.71E-02        |
| <i>Gm18737</i>       | predicted gene, 18737 [Source:MGI Symbol;Acc:MGI:5010922]                                                                                   | 11.88       | 1.69E-02        |
| <i>Erbb2</i>         | v-erb-b2 erythroblastic leukemia viral oncogene homolog 2, neuro/glioblastoma derived oncogene homolog (avian) [Source:MGI Symbol;Acc:MGI:9 | 11.91       | 4.67E-03        |
| <i>Disc1</i>         | disrupted in schizophrenia 1 [Source:MGI Symbol;Acc:MGI:2447658]                                                                            | 11.99       | 3.80E-02        |
| <i>Gm6793</i>        | predicted gene 6793 [Source:MGI Symbol;Acc:MGI:3643578]                                                                                     | 12.12       | 1.51E-02        |
| <i>1500035N22Rik</i> | RIKEN cDNA 1500035N22 gene [Source:MGI Symbol;Acc:MGI:1917508]                                                                              | 12.14       | 2.44E-02        |
| <i>Gnmt</i>          | glycine N-methyltransferase [Source:MGI Symbol;Acc:MGI:1202304]                                                                             | 12.16       | 4.21E-02        |
| <i>Gm26598</i>       | predicted gene, 26598 [Source:MGI Symbol;Acc:MGI:5477092]                                                                                   | 12.16       | 1.43E-02        |
| <i>Magee2</i>        | melanoma antigen, family E, 2 [Source:MGI Symbol;Acc:MGI:2148316]                                                                           | 12.18       | 3.27E-03        |
| <i>2610042L04Rik</i> | RIKEN cDNA 2610042L04 gene [Source:MGI Symbol;Acc:MGI:1914305]                                                                              | 12.21       | 1.73E-02        |
| <i>Gm5134</i>        | predicted gene 5134 [Source:MGI Symbol;Acc:MGI:3646667]                                                                                     | 12.38       | 6.39E-03        |
| <i>Gm5446</i>        | predicted gene 5446 [Source:MGI Symbol;Acc:MGI:3644854]                                                                                     | 12.39       | 9.92E-03        |
| <i>Cabp4</i>         | calcium binding protein 4 [Source:MGI Symbol;Acc:MGI:1920910]                                                                               | 12.46       | 2.15E-02        |
| <i>Pld4</i>          | phospholipase D family, member 4 [Source:MGI Symbol;Acc:MGI:2144765]                                                                        | 12.56       | 1.48E-02        |
| <i>Gm11212</i>       | predicted gene 11212 [Source:MGI Symbol;Acc:MGI:3651243]                                                                                    | 12.74       | 3.29E-02        |
| <i>Rpl21-ps9</i>     | ribosomal protein L21, pseudogene 9 [Source:MGI Symbol;Acc:MGI:3650934]                                                                     | 13.17       | 3.85E-02        |
| <i>Gm3436</i>        | predicted pseudogene 3436 [Source:MGI Symbol;Acc:MGI:3781613]                                                                               | 13.32       | 6.17E-03        |
| <i>D630036H23Rik</i> | RIKEN cDNA D630036H23 gene [Source:MGI Symbol;Acc:MGI:3704386]                                                                              | 13.43       | 3.57E-02        |
| <i>Gm11592</i>       | predicted gene 11592 [Source:MGI Symbol;Acc:MGI:3650504]                                                                                    | 13.49       | 1.94E-02        |
| <i>Zscan30</i>       | zinc finger and SCAN domain containing 30 [Source:MGI Symbol;Acc:MGI:2685600]                                                               | 13.63       | 3.99E-02        |
| <i>S100a3</i>        | S100 calcium binding protein A3 [Source:MGI Symbol;Acc:MGI:1338849]                                                                         | 13.78       | 1.60E-02        |
| <i>Gm25178</i>       | predicted gene, 25178 [Source:MGI Symbol;Acc:MGI:5454955]                                                                                   | 13.95       | 2.21E-02        |
| <i>AK157302</i>      | cDNA sequence AK157302 [Source:MGI Symbol;Acc:MGI:3574096]                                                                                  | 14.09       | 3.71E-02        |
| <i>Tmem205</i>       | transmembrane protein 205 [Source:MGI Symbol;Acc:MGI:3045495]                                                                               | 14.09       | 4.75E-02        |

|                |                                                           |       |          |
|----------------|-----------------------------------------------------------|-------|----------|
| <i>Gm8738</i>  | predicted gene 8738 [Source:MGI Symbol;Acc:MGI:3644778]   | 14.26 | 1.73E-02 |
| <i>Gm24224</i> | predicted gene, 24224 [Source:MGI Symbol;Acc:MGI:5454001] | 14.30 | 8.75E-03 |
| <i>Gm14088</i> | predicted gene 14088 [Source:MGI Symbol;Acc:MGI:3650492]  | 14.34 | 4.47E-02 |
| <i>Gm22136</i> | predicted gene, 22136 [Source:MGI Symbol;Acc:MGI:5451913] | 14.50 | 3.47E-02 |
| <i>Gm15523</i> | predicted gene 15523 [Source:MGI Symbol;Acc:MGI:3782970]  | 14.83 | 3.69E-02 |
| <i>Gm14068</i> | predicted gene 14068 [Source:MGI Symbol;Acc:MGI:3651670]  | 14.97 | 3.75E-02 |
| <i>Gm24596</i> | predicted gene, 24596 [Source:MGI Symbol;Acc:MGI:5454373] | 15.42 | 4.31E-02 |
| <i>Mir3547</i> | microRNA 3547 [Source:MGI Symbol;Acc:MGI:5452187]         | 15.89 | 2.30E-02 |
| <i>Mir207</i>  | microRNA 207 [Source:MGI Symbol;Acc:MGI:2676882]          | 16.11 | 2.99E-02 |
| <i>Gm26992</i> | predicted gene, 26992 [Source:MGI Symbol;Acc:MGI:5504107] | 18.30 | 8.09E-03 |

Supplementary Table 6: Analysis of RNA-seq data from WT and cDKO CD8a+ cells.

| Associated Gene Name | Coordinates Mus musculus Dec 2011 | cDKO Average FPKM | WT Average FPKM | WT / cDKO Log2 Fold Change | p-value  |
|----------------------|-----------------------------------|-------------------|-----------------|----------------------------|----------|
| <i>Ddx3y</i>         | chrY:1260714-1286613              | 67.8242           | 0.0442          | -10.5820                   | 0.000008 |
| <i>Kdm5d</i>         | chrY:897787-943811                | 29.4274           | 0.0270          | -10.0879                   | 0.000032 |
| <i>Uty</i>           | chrY:1096860-1245759              | 13.6516           | 0.0024          | -12.4442                   | 0.000001 |
| <i>Tsix</i>          | chrX:103431516-103484957          | 0.0869            | 16.6412         | 7.5806                     | 0.000181 |
| <i>Xist</i>          | chrX:103460374-103483217          | 0.0776            | 50.1220         | 9.3353                     | 0.000385 |
| <i>Snai3</i>         | chr8:122454205-122460692          | 0.0291            | 7.0043          | 7.9101                     | 0.000001 |
| <i>Gm26992</i>       | chrX:103422009-103481705          | 0.2878            | 28.5367         | 6.6317                     | 0.000168 |
| <i>Eif2s3y</i>       | chrY:1010542-1028847              | 33.5225           | 0.0001          | -18.3548                   | 0.003513 |
| <i>Sva</i>           | chr6:42038393-42042851            | 5.5669            | 0.0001          | -15.7646                   | 0.000117 |
| <i>Kdm6a</i>         | chrX:18162574-18279936            | 18.2417           | 29.7526         | 0.7058                     | 0.000230 |
| <i>Rgs3</i>          | chr4:62559846-62703018            | 14.9687           | 9.3007          | -0.6865                    | 0.000199 |
| <i>Cxcr4</i>         | chr1:128588198-128592293          | 77.1552           | 46.6624         | -0.7255                    | 0.000656 |
| <i>Kdm5c</i>         | chrX:152233019-152274535          | 22.9650           | 30.7651         | 0.4219                     | 0.000063 |
| <i>Commd10</i>       | chr18:46958861-47087992           | 13.7403           | 7.7583          | -0.8246                    | 0.000030 |
| <i>Rell1</i>         | chr5:63908895-63968905            | 1.7958            | 3.7296          | 1.0544                     | 0.001005 |
| <i>Fyb</i>           | chr15:6579870-6663313             | 64.8246           | 45.7073         | -0.5041                    | 0.002207 |
| <i>Ddit4</i>         | chr10:59949674-59951770           | 44.2231           | 26.8762         | -0.7185                    | 0.001247 |
| <i>Pisd-ps1</i>      | chr11:3125903-3131004             | 70.2668           | 103.9718        | 0.5653                     | 0.002869 |
| <i>Bmf</i>           | chr2:118528756-118549687          | 3.4035            | 1.6003          | -1.0887                    | 0.001550 |
| <i>Tbxa2r</i>        | chr10:81328731-81335171           | 32.5200           | 21.3994         | -0.6038                    | 0.002013 |
| <i>Zfp69</i>         | chr4:120930136-120951699          | 1.7500            | 3.9871          | 1.1880                     | 0.029423 |
| <i>Hmgcs1</i>        | chr13:119690461-119708086         | 42.7256           | 26.0944         | -0.7114                    | 0.004369 |
| <i>Pgm1</i>          | chr5:64092935-64128355            | 7.2398            | 10.5985         | 0.5498                     | 0.001218 |
| <i>Dnajc6</i>        | chr4:101496647-101642799          | 1.8263            | 0.9425          | -0.9543                    | 0.002593 |
| <i>Aim2</i>          | chr1:173350878-173466040          | 22.1608           | 27.3681         | 0.3045                     | 0.000014 |
| <i>Tle1</i>          | chr4:72117141-72200919            | 1.3121            | 2.2228          | 0.7605                     | 0.003907 |
| <i>Ugcg</i>          | chr4:59189256-59222833            | 77.6763           | 93.4504         | 0.2667                     | 0.000675 |
| <i>mt-Co1</i>        | chrM:5327-6872                    | 3329.9074         | 4413.7409       | 0.4065                     | 0.005435 |
| <i>Pptc7</i>         | chr5:122284364-122324281          | 28.3311           | 22.7143         | -0.3188                    | 0.000045 |
| <i>Klra13-ps</i>     | chr6:130291160-130306432          | 22.7292           | 41.8832         | 0.8818                     | 0.013279 |
| <i>Kcnj8</i>         | chr6:142564938-142571356          | 0.7627            | 2.3442          | 1.6199                     | 0.023791 |
| <i>Gm9522</i>        | chr15:39180510-39181441           | 6.0316            | 1.8250          | -1.7247                    | 0.018798 |
| <i>Emc9</i>          | chr14:55581515-55585302           | 38.2266           | 55.7436         | 0.5442                     | 0.008245 |
| <i>Gucy1a3</i>       | chr3:82092427-82145877            | 0.4831            | 0.9453          | 0.9686                     | 0.000040 |
| <i>Eif2s3x</i>       | chrX:94188706-94212862            | 2.8668            | 4.2364          | 0.5634                     | 0.001159 |
| <i>Mndal</i>         | chr1:173857220-173942491          | 196.9588          | 244.9110        | 0.3144                     | 0.003329 |
| <i>Igflr1</i>        | chr7:30565426-30567962            | 39.5896           | 28.4227         | -0.4781                    | 0.005127 |
| <i>Bbs9</i>          | chr9:22475714-22888280            | 9.0567            | 11.6997         | 0.3694                     | 0.001963 |
| <i>Cybb</i>          | chrX:9435251-9487771              | 0.2060            | 0.5419          | 1.3957                     | 0.004196 |
| <i>Scarna9</i>       | chr9:15326263-15326333            | 127.9479          | 71.9093         | -0.8313                    | 0.005740 |
| <i>Ptbp2</i>         | chr3:119718741-119783388          | 13.8236           | 17.6782         | 0.3548                     | 0.001714 |
| <i>Abhd15</i>        | chr11:77515120-77538607           | 9.2927            | 6.7020          | -0.4715                    | 0.001122 |
| <i>Pik3ap1</i>       | chr19:41274217-41385070           | 0.8439            | 2.1741          | 1.3653                     | 0.027431 |
| <i>Nampt</i>         | chr12:32820334-32853369           | 16.1425           | 20.6395         | 0.3545                     | 0.006360 |
| <i>Arrdc3</i>        | chr13:80883383-80896035           | 8.3133            | 13.0841         | 0.6543                     | 0.046142 |
| <i>Sox5</i>          | chr6:143828424-144781977          | 0.2858            | 0.1283          | -1.1552                    | 0.000809 |
| <i>Gm15819</i>       | chr5:63923900-63924969            | 1.3006            | 3.7363          | 1.5224                     | 0.000034 |
| <i>Zbp1</i>          | chr2:173206611-173218923          | 26.7301           | 36.5691         | 0.4522                     | 0.010973 |
| <i>Neu1</i>          | chr17:34931252-34935953           | 19.5394           | 25.0390         | 0.3578                     | 0.006865 |
| <i>Cnr2</i>          | chr4:135895393-135920207          | 20.6782           | 16.4749         | -0.3278                    | 0.001034 |
| <i>Hgh1</i>          | chr15:76368897-76371403           | 9.4775            | 6.4765          | -0.5493                    | 0.003407 |
| <i>Phf11b</i>        | chr14:59320963-59341335           | 28.7043           | 39.5826         | 0.4636                     | 0.013881 |
| <i>Gp49a</i>         | chr10:51480631-51486316           | 1.1373            | 2.8278          | 1.3141                     | 0.034975 |
| <i>Mir3064</i>       | chr11:106782692-106782759         | 440.7227          | 306.1467        | -0.5256                    | 0.006779 |
| <i>Pcbp2</i>         | chr15:102470631-102500059         | 36.4024           | 44.0608         | 0.2755                     | 0.001819 |
| <i>Trp53i11</i>      | chr2:93187547-93201759            | 14.7738           | 11.3223         | -0.3839                    | 0.002996 |
| <i>Cyth3</i>         | chr5:143622446-143710250          | 4.9968            | 7.1235          | 0.5116                     | 0.012804 |
| <i>Ncbp2</i>         | chr16:31948512-31961781           | 19.0526           | 13.7699         | -0.4685                    | 0.005961 |
| <i>Gm24105</i>       | chr5:149247953-149248244          | 12.5654           | 3.2640          | -1.9448                    | 0.070028 |
| <i>Gm15725</i>       | chr16:37882541-37883631           | 35.0323           | 25.1014         | -0.4809                    | 0.003900 |
| <i>Pycd3</i>         | chr1:173673674-173698392          | 39.0026           | 49.7208         | 0.3503                     | 0.013759 |
| <i>Gm20628</i>       | chr3:96267074-96270289            | 29.7204           | 37.2775         | 0.3268                     | 0.009580 |
| <i>Gm16229</i>       | chr10:127663838-127665484         | 16.9679           | 12.0559         | -0.4931                    | 0.002706 |
| <i>Gpr83</i>         | chr9:14860209-14870789            | 6.2936            | 3.6337          | -0.7925                    | 0.012703 |
| <i>Prss12</i>        | chr3:123446912-123506602          | 3.0498            | 4.7218          | 0.6306                     | 0.004999 |
| <i>Prf1</i>          | chr10:61297835-61304263           | 34.5950           | 44.1311         | 0.3512                     | 0.012643 |
| <i>Gm23436</i>       | chr1:161036983-161037049          | 325.0582          | 447.0052        | 0.4596                     | 0.010545 |
| <i>Gm11508</i>       | chr11:88011990-88048006           | 44.2785           | 30.2196         | -0.5511                    | 0.004350 |
| <i>Gapdh</i>         | chr6:125161714-125166467          | 4.8816            | 6.5755          | 0.4297                     | 0.009908 |

|                      |                           |           |           |         |          |
|----------------------|---------------------------|-----------|-----------|---------|----------|
| <i>Entpd1</i>        | chr19:40612365-40741602   | 0.5959    | 1.3204    | 1.1478  | 0.028686 |
| <i>Gm22154</i>       | chr4:123293151-123293282  | 26.4436   | 10.0472   | -1.3961 | 0.026246 |
| <i>Srgn</i>          | chr10:62493832-62527451   | 109.8480  | 144.9236  | 0.3998  | 0.026748 |
| <i>mt-Nd5</i>        | chrM:11741-13565          | 74.8594   | 114.6915  | 0.6155  | 0.047733 |
| <i>Gm12592</i>       | chr11:3305425-3331178     | 11.3390   | 8.6140    | -0.3965 | 0.001525 |
| <i>3110056K07Rik</i> | chr12:70991614-71015832   | 24.2618   | 18.0486   | -0.4268 | 0.004755 |
| <i>Gramd1a</i>       | chr7:31130126-31151050    | 248.6759  | 204.1882  | -0.2844 | 0.003256 |
| <i>Rsrp1</i>         | chr4:134923591-134927671  | 280.0792  | 220.4752  | -0.3452 | 0.010537 |
| <i>Rnaset2a</i>      | chr17:8128609-8148097     | 3.8617    | 1.9245    | -1.0048 | 0.012485 |
| <i>Ptpn3</i>         | chr4:57190840-57301837    | 0.2717    | 0.0963    | -1.4967 | 0.003168 |
| <i>lfi203</i>        | chr1:173920406-173942672  | 39.5794   | 49.4854   | 0.3223  | 0.020314 |
| <i>Sjfn1</i>         | chr11:83116848-83122670   | 182.7854  | 216.2962  | 0.2429  | 0.006245 |
| <i>Rpl5-ps1</i>      | chr1:14865071-14865965    | 0.6330    | 2.0881    | 1.7220  | 0.027185 |
| <i>Gadd45g</i>       | chr13:51846677-51848468   | 3.4113    | 5.8965    | 0.7896  | 0.014647 |
| <i>Adcy6</i>         | chr15:98589993-98607633   | 6.0849    | 4.5913    | -0.4063 | 0.004077 |
| <i>Wnt5b</i>         | chr6:119432530-119544347  | 0.9209    | 0.3724    | -1.3060 | 0.010245 |
| <i>B2m</i>           | chr2:122147685-122153083  | 3377.4231 | 4531.5800 | 0.4241  | 0.044149 |
| <i>Lgals1</i>        | chr15:78926724-78930465   | 161.5328  | 206.2223  | 0.3524  | 0.026750 |
| <i>Ccl3</i>          | chr1:83647843-83649355    | 1.7478    | 4.8125    | 1.4612  | 0.044497 |
| <i>St3gal6</i>       | chr16:58468124-58524243   | 7.4925    | 10.1150   | 0.4330  | 0.028293 |
| <i>Klf10</i>         | chr15:38294412-38300707   | 8.4473    | 11.3909   | 0.4313  | 0.027828 |
| <i>Atp2b1</i>        | chr10:98915151-99026143   | 27.9168   | 35.3636   | 0.3411  | 0.018073 |
| <i>Pmel</i>          | chr10:128706257-128720238 | 54.7747   | 69.5659   | 0.3449  | 0.017263 |
| <i>Agbl5</i>         | chr5:30888693-30906965    | 9.1349    | 11.8473   | 0.3751  | 0.013711 |
| <i>Gm24339</i>       | chr9:15326463-15326539    | 152.0676  | 73.6974   | -1.0450 | 0.060640 |
| <i>Gm4462</i>        | chr16:20664115-20664607   | 4.9630    | 2.0883    | -1.2489 | 0.009281 |
| <i>Naa20</i>         | chr2:145902098-145916425  | 10.8823   | 13.3657   | 0.2965  | 0.004440 |
| <i>Hist1h2ak</i>     | chr13:21753394-21753907   | 40.0981   | 62.4280   | 0.6387  | 0.023578 |
| <i>Fbxo45</i>        | chr16:32230111-32247158   | 8.1526    | 6.4002    | -0.3491 | 0.000391 |
| <i>NA</i>            | chr19:47894597-47919299   | 28.6343   | 23.5157   | -0.2841 | 0.003613 |
| <i>Hist1h4k</i>      | chr13:21750193-21750505   | 57.3712   | 77.7903   | 0.4393  | 0.018264 |
| <i>Oaz1</i>          | chr10:80826655-80829290   | 11.4719   | 8.6030    | -0.4152 | 0.004720 |
| <i>Dmrta1</i>        | chr4:89679435-89694772    | 0.6942    | 1.4942    | 1.1060  | 0.010243 |
| <i>Fln</i>           | chr11:59791407-59810016   | 14.4024   | 11.8320   | -0.2836 | 0.000148 |
| <i>G730046D07Rik</i> | chr7:126565918-126566380  | 20.0412   | 12.6163   | -0.6677 | 0.011972 |
| <i>Tcf4</i>          | chr18:69344145-69687967   | 0.2054    | 0.3750    | 0.8685  | 0.006551 |
| <i>mt-Nd6</i>        | chrM:13551-14070          | 46.9303   | 70.5761   | 0.5887  | 0.036077 |
| <i>Klrc1</i>         | chr6:129666014-129678973  | 6.2196    | 10.8986   | 0.8092  | 0.066798 |
| <i>St8sia6</i>       | chr2:13651019-13793808    | 0.1829    | 0.3644    | 0.9942  | 0.001737 |
| <i>Hist2h3b</i>      | chr3:96268653-96269141    | 36.0191   | 59.1371   | 0.7153  | 0.030189 |
| <i>5530601H04Rik</i> | chrX:105037196-105079609  | 2.1755    | 2.9020    | 0.4157  | 0.017906 |
| <i>Map3k12</i>       | chr15:102497648-102517064 | 6.3798    | 8.3045    | 0.3804  | 0.041980 |
| <i>Ost4</i>          | chr5:30905884-30907788    | 36.3396   | 48.7614   | 0.4242  | 0.022345 |
| <i>Gm9974</i>        | chr16:17081998-17082691   | 4.4949    | 7.3162    | 0.7028  | 0.001380 |
| <i>Gm12254</i>       | chr11:58508790-58509261   | 12.1809   | 5.8935    | -1.0474 | 0.042735 |
| <i>mt-Te</i>         | chrM:14070-14139          | 55.6679   | 94.7460   | 0.7672  | 0.020700 |
| <i>Sdf2</i>          | chr11:78245745-78255496   | 26.9219   | 20.7066   | -0.3787 | 0.006350 |
| <i>1700017B05Rik</i> | chr9:57252321-57262599    | 6.5631    | 5.0813    | -0.3692 | 0.004045 |
| <i>Pbdc1</i>         | chrX:105079755-105117090  | 4.9989    | 6.7351    | 0.4301  | 0.042449 |
| <i>Klhl21</i>        | chr4:152008802-152017680  | 12.5555   | 9.7194    | -0.3694 | 0.012995 |
| <i>Taf1c</i>         | chr8:119597974-119605222  | 14.7153   | 11.6948   | -0.3314 | 0.003076 |
| <i>Prss30</i>        | chr17:23972125-23975230   | 1.9236    | 1.0118    | -0.9269 | 0.007759 |
| <i>Gm25894</i>       | chr19:8724250-8724325     | 84.5585   | 139.5905  | 0.7232  | 0.033113 |
| <i>Cst7</i>          | chr2:150570414-150578944  | 71.8431   | 88.0508   | 0.2935  | 0.012141 |
| <i>1810022K09Rik</i> | chr3:14606319-14611221    | 50.4235   | 69.7506   | 0.4681  | 0.021987 |
| <i>Rbm12b1</i>       | chr4:12140263-12146731    | 8.0752    | 6.1075    | -0.4029 | 0.005276 |
| <i>Gm25099</i>       | chr4:117189941-117190057  | 45.5710   | 16.4894   | -1.4666 | 0.105588 |
| <i>Gm12596</i>       | chr4:59260050-59263269    | 1.6769    | 3.5476    | 1.0811  | 0.011156 |
| <i>Gm2245</i>        | chr15:6604340-6654303     | 15.0299   | 11.4128   | -0.3972 | 0.010654 |
| <i>F2r</i>           | chr13:95601803-95618459   | 31.8970   | 44.3632   | 0.4759  | 0.051859 |
| <i>Gpr183</i>        | chr14:121952330-121965193 | 36.6671   | 45.2039   | 0.3020  | 0.022789 |
| <i>1700023H06Rik</i> | chr13:80884223-80885524   | 4.7860    | 8.3922    | 0.8102  | 0.086490 |
| <i>Rgs1</i>          | chr1:144243971-144249242  | 3.0223    | 5.1066    | 0.7567  | 0.076060 |
| <i>S1pr1</i>         | chr3:115710432-115715055  | 287.1358  | 333.3592  | 0.2153  | 0.009324 |
| <i>Srp54b</i>        | chr12:55155103-55189213   | 0.6572    | 0.2963    | -1.1493 | 0.002539 |
| <i>Golga7</i>        | chr8:23241352-23257074    | 13.0197   | 9.7275    | -0.4205 | 0.009916 |
| <i>Nsun3</i>         | chr16:62732443-62786818   | 3.6013    | 4.7099    | 0.3872  | 0.007911 |
| <i>Gm14446</i>       | chr19:34592887-34601968   | 99.4548   | 135.2151  | 0.4431  | 0.038787 |
| <i>Hist3h2a</i>      | chr11:58954684-58956674   | 17.6747   | 22.8170   | 0.3684  | 0.019663 |
| <i>Gm4955</i>        | chr1:173468508-173491041  | 34.8574   | 44.8828   | 0.3647  | 0.036370 |
| <i>Rad23b</i>        | chr4:55350042-55392237    | 27.6654   | 34.3421   | 0.3119  | 0.022344 |

|                |                           |          |          |         |          |
|----------------|---------------------------|----------|----------|---------|----------|
| NA             | chr13:23535421-23535951   | 12.9676  | 21.9392  | 0.7586  | 0.037159 |
| Xdh            | chr17:73883907-73950182   | 25.6113  | 20.8675  | -0.2955 | 0.007731 |
| Ctla2a         | chr13:60934154-60936625   | 39.2106  | 58.6214  | 0.5802  | 0.062542 |
| Gga2           | chr7:121986721-122021222  | 1.2587   | 0.8867   | -0.5054 | 0.004601 |
| Nab2           | chr10:127660917-127668568 | 20.0843  | 16.1833  | -0.3116 | 0.003360 |
| Ryk            | chr9:102834916-102908305  | 0.1054   | 0.3402   | 1.6909  | 0.036406 |
| Ncald          | chr15:37366174-37792570   | 0.4949   | 0.9037   | 0.8686  | 0.041053 |
| Ccna2          | chr3:36564865-36572150    | 8.5367   | 12.2945  | 0.5263  | 0.076997 |
| Tlr12          | chr4:128615445-128618619  | 13.4585  | 9.9899   | -0.4300 | 0.015940 |
| Prosl          | chr16:62854306-62929346   | 0.1644   | 0.3999   | 1.2827  | 0.004950 |
| Abcb11         | chr2:69238281-69342616    | 0.1491   | 0.3494   | 1.2282  | 0.013153 |
| 9930111J21Rik2 | chr11:49015873-49051242   | 11.5223  | 13.9909  | 0.2801  | 0.012235 |
| Fam49a         | chr12:12262138-12376359   | 25.1507  | 29.6994  | 0.2398  | 0.009327 |
| Pdzd11         | chrX:100622882-100626568  | 8.5846   | 10.6944  | 0.3170  | 0.001274 |
| Scnm1          | chr3:95129535-95134012    | 22.2215  | 26.6395  | 0.2616  | 0.003428 |
| She            | chr3:89831369-89858834    | 0.9717   | 1.4578   | 0.5853  | 0.006834 |
| Tmem59         | chr4:107178398-107200996  | 51.3605  | 41.1188  | -0.3209 | 0.012362 |
| Hist1h1a       | chr13:23763667-23764414   | 41.3024  | 60.2671  | 0.5451  | 0.076673 |
| Ppp1r15a       | chr7:45522915-45526268    | 7.7183   | 11.4358  | 0.5672  | 0.087999 |
| Fbxo48         | chr11:16951374-16954772   | 0.9222   | 1.5993   | 0.7943  | 0.005133 |
| Zfp827         | chr8:79028436-79193766    | 4.3701   | 5.2748   | 0.2714  | 0.003680 |
| Nrp2           | chr1:62703284-62818695    | 1.9221   | 2.4959   | 0.3769  | 0.012499 |
| Fam129a        | chr1:151571185-151721939  | 3.2108   | 4.3374   | 0.4339  | 0.049985 |
| C92009B18Rik   | chr10:22306701-22321765   | 3.2945   | 4.4527   | 0.4346  | 0.056694 |
| Capn10         | chr1:92934375-92947941    | 4.4829   | 3.4391   | -0.3824 | 0.001261 |
| Pkp4           | chr2:59160849-59355208    | 11.5788  | 14.1002  | 0.2842  | 0.020551 |
| Etv3           | chr3:87525406-87540156    | 14.5698  | 12.2782  | -0.2469 | 0.001354 |
| A730015C16Rik  | chr4:108847398-108848619  | 11.7218  | 8.6006   | -0.4467 | 0.002785 |
| Map2           | chr1:66175272-66442583    | 0.0281   | 0.0826   | 1.5560  | 0.029636 |
| Maf            | chr8:115682941-115707794  | 0.1431   | 0.3216   | 1.1681  | 0.058535 |
| Zfp759         | chr13:67128227-67141787   | 6.0574   | 7.5965   | 0.3266  | 0.007524 |
| Slc25a27       | chr17:43641899-43667015   | 5.6670   | 4.1436   | -0.4517 | 0.005638 |
| Rtp4           | chr16:23609918-23614222   | 32.2371  | 45.9165  | 0.5103  | 0.070520 |
| Atxn7l3        | chr11:102289299-102296631 | 33.6388  | 28.5272  | -0.2378 | 0.001637 |
| Snx4           | chr16:33251455-33299562   | 79.8647  | 92.0608  | 0.2050  | 0.008331 |
| Klhl7          | chr5:24100589-24161223    | 4.6458   | 5.9551   | 0.3582  | 0.010985 |
| Lta4h          | chr10:93453395-93484896   | 74.7921  | 63.7144  | -0.2313 | 0.000707 |
| Exog           | chr9:119444922-119465517  | 3.8007   | 2.7872   | -0.4475 | 0.004499 |
| 2610524H06Rik  | chr5:114821934-114823468  | 11.6805  | 15.6016  | 0.4176  | 0.006578 |
| Gm9725         | chr8:81013575-81038584    | 15.6797  | 12.5898  | -0.3166 | 0.003899 |
| Them4          | chr3:94310088-94332540    | 1.3439   | 1.9757   | 0.5559  | 0.013634 |
| Lgalsl         | chr11:20823575-20831056   | 0.8703   | 1.5627   | 0.8445  | 0.070463 |
| Eea1           | chr10:95940662-96045518   | 3.0683   | 3.8727   | 0.3359  | 0.022552 |
| Gm25994        | chr11:106783170-106783271 | 962.0485 | 740.9862 | -0.3767 | 0.032996 |
| Prdm1          | chr10:44437176-44528501   | 0.3476   | 0.7829   | 1.1714  | 0.112868 |
| Gm22486        | chr6:71882556-71882693    | 67.5696  | 23.5296  | -1.5219 | 0.037249 |
| Gm16334        | chr4:152418282-152421834  | 3.0379   | 1.4763   | -1.0411 | 0.000756 |
| Med22          | chr2:26905261-26910677    | 17.5678  | 14.0887  | -0.3184 | 0.009080 |
| Ccne2          | chr4:11191350-11204779    | 4.1076   | 5.4619   | 0.4111  | 0.028724 |
| Spaca1         | chr4:34024873-34050191    | 1.8922   | 0.6516   | -1.5380 | 0.049996 |
| Ighj2          | chr12:113429513-113429567 | 28.9862  | 11.5607  | -1.3261 | 0.004150 |
| Mycbp2         | chr14:103113410-103346814 | 57.1068  | 46.1647  | -0.3069 | 0.023001 |
| Dnah8          | chr17:30624353-30875264   | 31.2812  | 22.1760  | -0.4963 | 0.076658 |
| Snn            | chr16:11066297-11074983   | 2.1127   | 3.2502   | 0.6214  | 0.038327 |
| 2700081O15Rik  | chr19:7417624-7425904     | 1.9539   | 1.3638   | -0.5187 | 0.006246 |
| Acvr2a         | chr2:48814108-48903269    | 3.5053   | 4.4926   | 0.3580  | 0.025835 |
| Snord15a       | chr7:99482784-99482932    | 73.8982  | 42.3378  | -0.8036 | 0.061545 |
| Scd2           | chr19:44293675-44306864   | 16.6235  | 13.5532  | -0.2946 | 0.012040 |
| Cacnb4         | chr2:52428319-52676831    | 0.2567   | 0.4294   | 0.7420  | 0.003964 |
| Sipa1l2        | chr8:125418062-125492710  | 6.2796   | 4.9789   | -0.3349 | 0.014423 |
| Ranbp1         | chr16:18239783-18248732   | 58.5557  | 73.7645  | 0.3331  | 0.043359 |
| Dhx58os        | chr11:100687416-100697520 | 1.7852   | 2.8494   | 0.6746  | 0.009973 |
| Rpl19-ps11     | chr8:19492905-19493623    | 18.9754  | 7.8173   | -1.2794 | 0.042280 |
| Ankrd39        | chr1:36538172-36547201    | 9.0999   | 6.7989   | -0.4205 | 0.007144 |
| Ccnl2          | chr4:155812488-155824543  | 77.7373  | 63.3039  | -0.2963 | 0.023725 |
| Gm17021        | chr9:123772184-123790939  | 17.8825  | 12.0618  | -0.5681 | 0.011847 |
| Ctss           | chr3:95526785-95556403    | 159.8916 | 182.6801 | 0.1922  | 0.009993 |
| Trbv20         | chr6:41188272-41188977    | 33.9621  | 46.4019  | 0.4503  | 0.030586 |
| Prr13          | chr15:102459027-102462806 | 19.6871  | 25.4038  | 0.3678  | 0.028145 |
| Zfp708         | chr13:67069399-67097976   | 4.8504   | 6.4239   | 0.4054  | 0.021472 |
| H2-Ab1         | chr17:34263208-34269418   | 2.2870   | 3.9244   | 0.7790  | 0.023535 |



|                      |                           |           |           |         |          |
|----------------------|---------------------------|-----------|-----------|---------|----------|
| <i>Edrf1</i>         | chr7:133637542-133672971  | 17.6377   | 14.3193   | -0.3007 | 0.018508 |
| <i>Rnf157</i>        | chr11:116336352-116413032 | 1.0868    | 0.6127    | -0.8269 | 0.078036 |
| <i>Id2</i>           | chr12:25093800-25096092   | 56.4841   | 66.6034   | 0.2378  | 0.023043 |
| <i>Serpinb6b</i>     | chr13:32965208-32979067   | 19.8266   | 15.1794   | -0.3853 | 0.026969 |
| <i>Tmem243</i>       | chr5:9100736-9118983      | 50.5566   | 60.0183   | 0.2475  | 0.010260 |
| <i>Pisd</i>          | chr5:32736300-32785646    | 16.7120   | 20.1091   | 0.2670  | 0.019383 |
| <i>Rbm3</i>          | chrX:8138974-8145880      | 34.7769   | 27.9793   | -0.3138 | 0.025467 |
| <i>Tspo</i>          | chr15:83563572-83574201   | 54.9079   | 41.5759   | -0.4013 | 0.027306 |
| <i>Akap2</i>         | chr4:57717656-57896984    | 6.3263    | 5.1622    | -0.2934 | 0.005460 |
| <i>Evi2a</i>         | chr11:79526559-79530609   | 8.1292    | 10.6798   | 0.3937  | 0.046035 |
| <i>Casp4</i>         | chr9:5308827-5336783      | 1.7986    | 3.0534    | 0.7636  | 0.085926 |
| <i>Gm12176</i>       | chr11:47541431-47542306   | 1.7396    | 0.6288    | -1.4681 | 0.044773 |
| <i>Aqp9</i>          | chr9:71110658-71168682    | 1.6325    | 2.7990    | 0.7779  | 0.085427 |
| <i>Myom1</i>         | chr17:71019520-71126856   | 0.3557    | 0.1708    | -1.0579 | 0.001182 |
| <i>Palm2Akap2</i>    | chr4:57568178-57896982    | 6.0765    | 4.9416    | -0.2983 | 0.006449 |
| <i>1600014C10Rik</i> | chr7:38183216-38197568    | 23.7105   | 26.9773   | 0.1862  | 0.002569 |
| <i>Gm11399</i>       | chr11:3142047-3143363     | 17.0920   | 24.7766   | 0.5357  | 0.013763 |
| <i>Actn4</i>         | chr7:28893247-28962340    | 18.1907   | 21.6143   | 0.2488  | 0.031633 |
| <i>Afp</i>           | chr5:90490713-90508907    | 7.4690    | 5.3178    | -0.4901 | 0.032429 |
| <i>Ccdc117</i>       | chr11:5528886-5542187     | 25.7034   | 19.9393   | -0.3663 | 0.039803 |
| <i>Ccdc171</i>       | chr4:83525544-83864670    | 4.7002    | 5.8155    | 0.3072  | 0.009263 |
| <i>Slfm8</i>         | chr11:83002157-83020810   | 52.5006   | 65.7497   | 0.3247  | 0.057177 |
| <i>Ptma</i>          | chr1:86526735-86530698    | 104.7585  | 141.8687  | 0.4375  | 0.078074 |
| <i>Hist1h2ai</i>     | chr13:21716411-21717452   | 7.5240    | 10.3932   | 0.4661  | 0.027217 |
| <i>Casp1</i>         | chr9:5298516-5307265      | 7.9164    | 12.0964   | 0.6117  | 0.092462 |
| <i>Kremen1</i>       | chr11:5191551-5261558     | 7.7892    | 6.4419    | -0.2740 | 0.006740 |
| <i>Pddc1</i>         | chr7:141408134-141414136  | 16.9355   | 13.1392   | -0.3662 | 0.027006 |
| <i>Dnajb1</i>        | chr8:83608174-83611902    | 47.9515   | 35.0910   | -0.4505 | 0.074152 |
| <i>Gm14453</i>       | chr2:173025684-173034580  | 24.2301   | 17.2725   | -0.4883 | 0.019827 |
| <i>NA</i>            | chr5:146261002-146261084  | 3438.2230 | 1939.7630 | -0.8258 | 0.022907 |
| <i>Trim30c</i>       | chr7:104382064-104390586  | 7.7240    | 11.2882   | 0.5474  | 0.076995 |
| <i>Abcb1a</i>        | chr5:8660076-8748575      | 8.2190    | 10.4759   | 0.3500  | 0.054594 |
| <i>Ccr2</i>          | chr9:124101949-124113557  | 4.6655    | 8.9528    | 0.9403  | 0.062100 |
| <i>Gm5931</i>        | chrX:10660521-10660998    | 4.3987    | 8.0914    | 0.8793  | 0.027649 |
| <i>Lilrb4</i>        | chr10:51480639-51496613   | 1.2343    | 2.5197    | 1.0296  | 0.073359 |
| <i>Chpt1</i>         | chr10:88452744-88504073   | 0.9630    | 1.3316    | 0.4676  | 0.023610 |
| <i>Kcnn4</i>         | chr7:24370262-24385209    | 92.9924   | 80.3454   | -0.2109 | 0.003577 |
| <i>Gm26631</i>       | chr9:57531286-57537629    | 8.7184    | 6.1342    | -0.5072 | 0.054079 |
| <i>Dusp1</i>         | chr17:26505589-26508519   | 1.6175    | 2.9263    | 0.8553  | 0.170617 |
| <i>Mbnl1</i>         | chr3:60501251-60629748    | 373.4339  | 425.4495  | 0.1881  | 0.008547 |
| <i>NA</i>            | chr3:90062795-90068347    | 8.6394    | 6.7678    | -0.3522 | 0.009929 |
| <i>Rps13-ps2</i>     | chr7:88530404-88530925    | 69.3878   | 46.8323   | -0.5672 | 0.073352 |
| <i>Qser1</i>         | chr2:104754794-104816696  | 1.1756    | 1.5901    | 0.4356  | 0.033770 |
| <i>Fitm2</i>         | chr2:163466378-163472629  | 4.3786    | 3.4087    | -0.3612 | 0.000790 |
| <i>Npm3</i>          | chr19:45747733-45749591   | 25.9975   | 19.9610   | -0.3812 | 0.017845 |
| <i>Ust</i>           | chr10:8204752-8518825     | 2.3092    | 3.2499    | 0.4930  | 0.038800 |
| <i>Ubal2</i>         | chr11:116434093-116439077 | 5.7681    | 4.0141    | -0.5230 | 0.012891 |
| <i>Gm20531</i>       | chr6:124732167-124738040  | 36.0464   | 46.2206   | 0.3587  | 0.065284 |
| <i>Ftx</i>           | chrX:103560906-103623754  | 3.4174    | 4.3640    | 0.3527  | 0.069636 |
| <i>Zgpat</i>         | chr2:181364927-181383628  | 65.1523   | 54.7352   | -0.2513 | 0.017255 |
| <i>Gm16534</i>       | chr2:32050085-32064911    | 23.3318   | 18.0715   | -0.3686 | 0.040375 |
| <i>Hist2h2bb</i>     | chr3:96269720-96279001    | 45.1392   | 52.9294   | 0.2297  | 0.026288 |
| <i>Gm11670</i>       | chr11:108939309-108942015 | 7.7370    | 4.5447    | -0.7676 | 0.018385 |
| <i>Gm10232</i>       | chr17:3043883-3044750     | 1.1148    | 2.3731    | 1.0900  | 0.026537 |
| <i>Slc39a7</i>       | chr17:34028266-34031690   | 42.2240   | 36.2414   | -0.2204 | 0.001165 |
| <i>Slc35a1</i>       | chr4:34663256-34687438    | 8.4388    | 6.3710    | -0.4055 | 0.018068 |
| <i>Gm26856</i>       | chr7:49856161-49857600    | 7.6123    | 5.4813    | -0.4738 | 0.008069 |
| <i>Pofut1</i>        | chr2:153241532-153270247  | 8.0568    | 6.6851    | -0.2693 | 0.019465 |
| <i>Fam204a</i>       | chr19:60198585-60226697   | 16.8969   | 20.1445   | 0.2536  | 0.012772 |
| <i>Sestd1</i>        | chr2:77180339-77280592    | 0.1391    | 0.2705    | 0.9598  | 0.046116 |
| <i>Mrpl17</i>        | chr7:105806657-105811099  | 6.6036    | 7.8330    | 0.2463  | 0.002203 |
| <i>Gm5620</i>        | chr9:91097147-91098500    | 0.7675    | 1.6763    | 1.1270  | 0.040994 |
| <i>Vps37b</i>        | chr5:124004640-124032260  | 45.6631   | 57.2596   | 0.3265  | 0.071337 |
| <i>Dcaf15</i>        | chr8:84097074-84104773    | 37.8416   | 31.9235   | -0.2454 | 0.011629 |
| <i>Ccnd3</i>         | chr17:47505050-47599691   | 23.2158   | 20.0206   | -0.2136 | 0.007845 |
| <i>Lman2l</i>        | chr1:36422064-36445271    | 2.0119    | 1.5336    | -0.3917 | 0.000210 |
| <i>Ankrd10</i>       | chr8:11611582-11635754    | 40.6620   | 34.3131   | -0.2449 | 0.013239 |
| <i>Plin2</i>         | chr4:86648385-86670060    | 2.2912    | 1.5339    | -0.5788 | 0.026874 |
| <i>Hsph1</i>         | chr5:149614286-149636376  | 12.5526   | 9.0840    | -0.4666 | 0.107333 |
| <i>Eaf1</i>          | chr14:31495078-31509858   | 15.6975   | 13.0054   | -0.2714 | 0.009762 |
| <i>Tmem260</i>       | chr14:48446127-48515135   | 6.2826    | 5.2062    | -0.2711 | 0.005767 |

|                      |                           |          |          |         |          |
|----------------------|---------------------------|----------|----------|---------|----------|
| <i>Sik1</i>          | chr17:31844247-31855792   | 6.1716   | 4.8170   | -0.3575 | 0.014677 |
| <i>Pygo2</i>         | chr3:89430213-89435128    | 14.8040  | 12.0608  | -0.2957 | 0.017387 |
| <i>Ctps</i>          | chr4:120539867-120570276  | 14.4072  | 12.0803  | -0.2541 | 0.001643 |
| <i>Fam134c</i>       | chr11:101096321-101119893 | 43.8060  | 37.6228  | -0.2195 | 0.006924 |
| <i>Gm22357</i>       | chr1:161036056-161036139  | 448.5621 | 586.9089 | 0.3878  | 0.067963 |
| <i>Gm6030</i>        | chr16:45205099-45205501   | 42.3274  | 26.3581  | -0.6833 | 0.110721 |
| <i>Tmem229b</i>      | chr12:78961794-79007627   | 27.5889  | 23.9270  | -0.2055 | 0.001181 |
| <i>Zc3h14</i>        | chr12:98746967-98787774   | 33.1164  | 37.2275  | 0.1688  | 0.003495 |
| <i>Zfp85</i>         | chr13:67747799-67755228   | 8.2343   | 10.2991  | 0.3228  | 0.021979 |
| <i>Kbtbd2</i>        | chr6:56777523-56797813    | 39.8017  | 33.7536  | -0.2378 | 0.010269 |
| <i>Snx14</i>         | chr9:88376746-88438958    | 11.9900  | 13.8930  | 0.2125  | 0.014304 |
| <i>A730085K08Rik</i> | chr9:122380574-122398801  | 1.1647   | 1.8330   | 0.6542  | 0.006234 |
| <i>Fgf13</i>         | chrX:59062144-59568071    | 3.7704   | 4.8131   | 0.3523  | 0.030354 |
| <i>Amigo2</i>        | chr15:97244073-97247287   | 11.4798  | 8.6664   | -0.4056 | 0.044065 |
| <i>Creg1</i>         | chr1:165763745-165775308  | 8.0379   | 9.6526   | 0.2641  | 0.000342 |
| <i>1700022111Rik</i> | chr4:42969945-42983639    | 5.6149   | 4.1492   | -0.4364 | 0.040806 |
| <i>F2rl3</i>         | chr8:72761879-72763874    | 5.8329   | 4.2154   | -0.4685 | 0.015458 |
| <i>Eno1</i>          | chr4:150236720-150248879  | 13.0216  | 10.8642  | -0.2613 | 0.012256 |
| <i>Fam71b</i>        | chr1:46396558-46407982    | 3.7574   | 4.9188   | 0.3886  | 0.017580 |
| <i>A430018G15Rik</i> | chr2:52425011-52434885    | 0.4050   | 0.8557   | 1.0790  | 0.000788 |
| <i>Gm14269</i>       | chr2:170463513-170463819  | 4.7682   | 8.7189   | 0.8707  | 0.008692 |
| <i>Trbj2-7</i>       | chr6:41543809-41543856    | 180.3461 | 115.5600 | -0.6421 | 0.044998 |
| <i>Ccne1</i>         | chr7:38097983-38107534    | 18.2954  | 15.3292  | -0.2552 | 0.004075 |
| <i>Gm27010</i>       | chr14:61625925-61627337   | 5.5525   | 3.4148   | -0.7013 | 0.027162 |
| <i>Crkl</i>          | chr16:17451986-17486255   | 23.7996  | 20.4889  | -0.2161 | 0.001502 |
| <i>1700064H15Rik</i> | chr3:19610367-19628677    | 25.2391  | 34.3757  | 0.4457  | 0.038765 |
| <i>Arhgef2</i>       | chr3:88607453-88648052    | 21.3891  | 18.3723  | -0.2193 | 0.014335 |
| <i>Psrc1</i>         | chr3:108383838-108388231  | 0.8374   | 0.4417   | -0.9229 | 0.014711 |
| <i>H6pd</i>          | chr4:149979474-150009023  | 10.4693  | 8.4424   | -0.3104 | 0.028721 |
| <i>Ube2l6</i>        | chr2:84798827-84810335    | 0.5079   | 1.0408   | 1.0351  | 0.031383 |
| <i>Adcy7</i>         | chr8:88272402-88329962    | 134.1400 | 114.0101 | -0.2346 | 0.022973 |
| <i>Gm5391</i>        | chrX:68319637-68320250    | 2.2927   | 4.1001   | 0.8386  | 0.026822 |
| <i>I830012O16Rik</i> | chr19:34607969-34613401   | 2.9077   | 6.2981   | 1.1150  | 0.037649 |
| <i>Snx10</i>         | chr6:51523900-51590679    | 4.3804   | 5.4052   | 0.3033  | 0.041962 |
| <i>Arpc2</i>         | chr1:74236496-74268209    | 195.0271 | 226.3977 | 0.2152  | 0.030932 |
| <i>Gimap3</i>        | chr6:48765088-48766519    | 291.9418 | 242.4975 | -0.2677 | 0.027036 |
| <i>Mfsd11</i>        | chr11:116852439-116875635 | 7.2607   | 5.8736   | -0.3059 | 0.025892 |
| <i>NA</i>            | chr1:171419032-171420352  | 5.1829   | 2.9916   | -0.7928 | 0.003142 |
| <i>Slc22a23</i>      | chr13:34179157-34345182   | 0.8311   | 0.5182   | -0.6815 | 0.036697 |
| <i>Ttll3</i>         | chr6:113389259-113414583  | 11.5934  | 9.5086   | -0.2860 | 0.021310 |
| <i>Gm26493</i>       | chr8:95746059-95746195    | 16.7911  | 7.5317   | -1.1567 | 0.043599 |
| <i>6330409D20Rik</i> | chr2:32732619-32741016    | 8.1617   | 5.9786   | -0.4491 | 0.015237 |
| <i>Ttc39b</i>        | chr4:83220299-83324255    | 21.4086  | 15.9723  | -0.4226 | 0.097197 |
| <i>Gm23138</i>       | chr4:108498043-108498146  | 4.2764   | 11.4177  | 1.4168  | 0.036070 |
| <i>Slc4a2</i>        | chr5:24423836-24440950    | 10.0445  | 8.4608   | -0.2475 | 0.005737 |
| <i>Slc1a5</i>        | chr7:16781345-16798274    | 63.0272  | 52.8111  | -0.2551 | 0.029550 |
| <i>Ctu2</i>          | chr8:122476142-122484138  | 17.5313  | 14.5766  | -0.2663 | 0.030283 |
| <i>Fau</i>           | chr19:6057887-6059524     | 14.7407  | 19.6333  | 0.4135  | 0.046542 |
| <i>Mir677</i>        | chr10:128085288-128085360 | 23.3733  | 11.2072  | -1.0604 | 0.009598 |
| <i>Cd79b</i>         | chr11:106311340-106314762 | 11.2694  | 14.3677  | 0.3504  | 0.047636 |
| <i>Hist1h1d</i>      | chr13:23555031-23558852   | 17.1909  | 21.9835  | 0.3548  | 0.083961 |
| <i>Cnot6l</i>        | chr5:96070332-96164171    | 30.8912  | 35.8311  | 0.2140  | 0.047989 |
| <i>Zfp773</i>        | chr7:7130677-7136755      | 3.4219   | 2.5130   | -0.4454 | 0.011437 |
| <i>Zfp658</i>        | chr7:43562255-43575461    | 6.2716   | 5.1063   | -0.2966 | 0.000295 |
| <i>Cdr2</i>          | chr7:120957035-120982312  | 5.1488   | 3.8066   | -0.4357 | 0.032380 |
| <i>Dennd4a</i>       | chr9:64811339-64919667    | 14.8434  | 18.1676  | 0.2915  | 0.067026 |
| <i>Xkrx</i>          | chrX:134149042-134162076  | 2.3861   | 3.5558   | 0.5755  | 0.119513 |
| <i>Gm15726</i>       | chrX:169979046-169985232  | 3.7982   | 6.2747   | 0.7242  | 0.028929 |
| <i>A930029G22Rik</i> | chr17:69416659-69439304   | 4.4088   | 3.0889   | -0.5133 | 0.011909 |
| <i>G0s2</i>          | chr1:193272160-193273188  | 3.9644   | 6.7528   | 0.7684  | 0.110776 |
| <i>Ppp2r4</i>        | chr2:30416038-30447806    | 19.9214  | 17.1742  | -0.2141 | 0.004082 |
| <i>Lime1</i>         | chr2:181380077-181383628  | 105.8635 | 88.2731  | -0.2622 | 0.029037 |
| <i>Manea</i>         | chr4:26324505-26346891    | 7.6446   | 9.0921   | 0.2502  | 0.037180 |
| <i>Ret</i>           | chr6:118151747-118197744  | 0.0539   | 0.1914   | 1.8269  | 0.201269 |
| <i>Zfp36l1</i>       | chr12:80107759-80113013   | 20.0232  | 23.9115  | 0.2560  | 0.055727 |
| <i>Capza1</i>        | chr3:104822778-104864505  | 22.9977  | 26.6576  | 0.2131  | 0.018952 |
| <i>Itgae</i>         | chr11:73090582-73147446   | 69.4035  | 56.8345  | -0.2882 | 0.029352 |
| <i>Evi2b</i>         | chr11:79513384-79530589   | 26.5302  | 30.7256  | 0.2118  | 0.034781 |
| <i>Rad9b</i>         | chr5:122323222-122354233  | 14.5070  | 12.1247  | -0.2588 | 0.002130 |
| <i>Dynlrb1</i>       | chr2:155236532-155250277  | 51.4425  | 66.1256  | 0.3622  | 0.071838 |
| <i>Luzp1</i>         | chr4:136469760-136554780  | 1.8912   | 2.4267   | 0.3597  | 0.044257 |

|                      |                           |         |         |         |          |
|----------------------|---------------------------|---------|---------|---------|----------|
| <i>Vamp1</i>         | chr6:125215550-125244543  | 10.5222 | 8.9353  | -0.2359 | 0.007494 |
| <i>Gm21975</i>       | chr11:79513384-79530559   | 26.9128 | 31.1591 | 0.2114  | 0.034863 |
| <i>Hnrnpa0</i>       | chr13:58125878-58128556   | 51.3475 | 40.8399 | -0.3303 | 0.054262 |
| <i>Acrbp</i>         | chr6:125049688-125063267  | 4.6555  | 3.6558  | -0.3488 | 0.002511 |
| <i>Tex15</i>         | chr8:33516737-33585582    | 0.0812  | 0.2031  | 1.3221  | 0.177050 |
| <i>Gm24134</i>       | chr2:26912529-26912600    | 36.1822 | 17.2311 | -1.0703 | 0.031084 |
| <i>Kdm5b</i>         | chr1:134560170-134632877  | 17.1985 | 14.3443 | -0.2618 | 0.026976 |
| <i>Hist1h3b</i>      | chr13:23752266-23752886   | 17.6239 | 25.5535 | 0.5360  | 0.100879 |
| <i>Trbv1</i>         | chr6:40891295-40891885    | 62.5894 | 45.1053 | -0.4726 | 0.053396 |
| <i>Ip6k1</i>         | chr9:108002500-108048780  | 42.6544 | 36.5667 | -0.2222 | 0.020211 |
| <i>Uggt2</i>         | chr14:118985038-119099430 | 0.2084  | 0.3449  | 0.7271  | 0.077583 |
| <i>Rab10os</i>       | chr12:3235503-3250377     | 10.7030 | 12.9072 | 0.2702  | 0.033589 |
| <i>Klf9</i>          | chr19:23141225-23166911   | 1.3137  | 1.8224  | 0.4722  | 0.002527 |
| <i>Cr1l</i>          | chr1:195103788-195131570  | 50.4770 | 56.7344 | 0.1686  | 0.009975 |
| <i>Xpa</i>           | chr4:46155346-46196311    | 18.1301 | 21.4424 | 0.2421  | 0.014006 |
| <i>Ccl25</i>         | chr8:4325209-4360020      | 1.9060  | 1.2063  | -0.6600 | 0.019093 |
| <i>Tbc1d31</i>       | chr15:57912198-57970067   | 2.1694  | 2.6900  | 0.3103  | 0.020417 |
| <i>Oas3</i>          | chr5:120753097-120777661  | 13.8592 | 18.8329 | 0.4424  | 0.114294 |
| <i>Ppm1f</i>         | chr16:16896468-16927364   | 17.5515 | 14.8175 | -0.2443 | 0.013060 |
| <i>Plxna1</i>        | chr6:89316315-89362613    | 0.4497  | 0.2880  | -0.6432 | 0.007697 |
| <i>Fam46a</i>        | chr9:85320438-85327124    | 22.9849 | 25.9923 | 0.1774  | 0.037393 |
| <i>Cd28</i>          | chr1:60716799-60773359    | 31.8509 | 37.9745 | 0.2537  | 0.099497 |
| <i>Zeb2</i>          | chr2:44983633-45117395    | 0.1766  | 0.3302  | 0.9033  | 0.104178 |
| <i>Gm23925</i>       | chr2:158359797-158359929  | 38.2960 | 25.4367 | -0.5903 | 0.005638 |
| <i>Gm10548</i>       | chr18:34207774-34221772   | 2.5993  | 1.8548  | -0.4868 | 0.002994 |
| <i>Cep85l</i>        | chr10:53278080-53379851   | 2.6078  | 3.4927  | 0.4215  | 0.028658 |
| <i>Gm15135</i>       | chr7:104261464-104262174  | 52.9127 | 64.4522 | 0.2846  | 0.060654 |
| <i>Gm17296</i>       | chr8:126426651-126475065  | 8.6361  | 7.2542  | -0.2516 | 0.005154 |
| <i>Gm22571</i>       | chr9:64175870-64175941    | 36.4984 | 19.2883 | -0.9201 | 0.038069 |
| <i>Gm6712</i>        | chr17:17316077-17319511   | 12.6991 | 18.8366 | 0.5688  | 0.043267 |
| <i>NA</i>            | chr1:151344368-151344736  | 27.1147 | 19.3565 | -0.4863 | 0.020571 |
| <i>Gm12696</i>       | chr4:97521427-97522332    | 11.2193 | 15.5094 | 0.4672  | 0.079672 |
| <i>6430590A07Rik</i> | chr3:40885896-40894123    | 7.5259  | 10.6184 | 0.4966  | 0.079813 |
| <i>Sac3d1</i>        | chr19:6116003-6118586     | 7.6530  | 5.7228  | -0.4193 | 0.007201 |
| <i>Ccdc88a</i>       | chr11:29373657-29510808   | 0.2867  | 0.4266  | 0.5735  | 0.019151 |
| <i>Gcn1l1</i>        | chr5:115565253-115622656  | 11.9078 | 10.3118 | -0.2076 | 0.016829 |
| <i>Cers4</i>         | chr8:4493025-4525757      | 3.3384  | 4.0885  | 0.2924  | 0.032548 |
| <i>Gm16091</i>       | chr8:72147600-72160855    | 27.7013 | 21.0328 | -0.3973 | 0.053714 |
| <i>Gng2</i>          | chr14:19872558-19977627   | 17.1932 | 20.4315 | 0.2490  | 0.064619 |
| <i>Col11a2</i>       | chr17:34039436-34066685   | 2.7999  | 1.9332  | -0.5344 | 0.100975 |
| <i>Nudt16l1</i>      | chr16:4939110-4941020     | 24.0999 | 19.5920 | -0.2988 | 0.013372 |
| <i>Snopc3</i>        | chr4:83417723-83467676    | 25.1156 | 28.7773 | 0.1964  | 0.024228 |
| <i>Upf2</i>          | chr2:5951468-6056703      | 17.2094 | 19.5450 | 0.1836  | 0.009627 |
| <i>Cbx8</i>          | chr11:119036304-119040969 | 7.5630  | 5.8888  | -0.3610 | 0.034168 |
| <i>Col27a1</i>       | chr4:63214003-63334991    | 0.0337  | 0.0839  | 1.3156  | 0.022585 |
| <i>Bfar</i>          | chr16:13671857-13703612   | 22.1484 | 18.3968 | -0.2677 | 0.033850 |
| <i>Ppp1cc</i>        | chr5:122158277-122175273  | 6.1232  | 4.8885  | -0.3249 | 0.007262 |
| <i>4933421O10Rik</i> | chr4:33027141-33031323    | 1.8981  | 2.5483  | 0.4250  | 0.043862 |
| <i>Cdkn2c</i>        | chr4:109660875-109667189  | 3.6169  | 4.7260  | 0.3859  | 0.024121 |
| <i>Hbp1</i>          | chr12:31926253-31950535   | 37.1199 | 41.0757 | 0.1461  | 0.008715 |
| <i>Hist1h2an</i>     | chr13:21786825-21787218   | 8.9541  | 14.7406 | 0.7192  | 0.086819 |
| <i>Zfp329</i>        | chr7:12804976-12818858    | 20.9282 | 17.5217 | -0.2563 | 0.029922 |
| <i>Fer15</i>         | chr1:36372290-36422110    | 0.6356  | 0.3985  | -0.6736 | 0.017590 |
| <i>Exosc9</i>        | chr3:36552605-36565729    | 10.4910 | 12.1838 | 0.2158  | 0.017849 |
| <i>Eif1</i>          | chr11:100319884-100322096 | 18.0190 | 23.5458 | 0.3860  | 0.138935 |
| <i>Wibg</i>          | chr10:128747878-128766568 | 58.0729 | 72.1006 | 0.3121  | 0.074405 |
| <i>Ier3</i>          | chr17:35821683-35822923   | 4.4235  | 6.0437  | 0.4502  | 0.007755 |
| <i>Sfi1</i>          | chr11:3131849-3193463     | 26.8753 | 31.5399 | 0.2309  | 0.091820 |
| <i>Dcp2</i>          | chr18:44380499-44424969   | 18.2724 | 14.9985 | -0.2848 | 0.046255 |
| <i>Psmb4</i>         | chr3:94884092-94886961    | 79.6384 | 62.8339 | -0.3419 | 0.063245 |
| <i>Ogfrl1</i>        | chr1:23366423-23383175    | 0.5562  | 0.8348  | 0.5857  | 0.015577 |
| <i>Sgol2</i>         | chr1:57995970-58025899    | 1.1446  | 1.8335  | 0.6798  | 0.118390 |
| <i>Dynll1</i>        | chr5:115297109-115300999  | 15.7417 | 11.4681 | -0.4570 | 0.102800 |
| <i>Tnpo2</i>         | chr8:85036914-85057583    | 23.3310 | 20.3489 | -0.1973 | 0.003804 |
| <i>Rnf138</i>        | chr18:21001340-21028223   | 23.2808 | 26.9247 | 0.2098  | 0.046737 |
| <i>Mxd3</i>          | chr13:55325167-55329758   | 7.1145  | 8.8894  | 0.3213  | 0.031009 |
| <i>Habp4</i>         | chr13:64161865-64186536   | 8.7926  | 7.1471  | -0.2989 | 0.009035 |
| <i>Nono</i>          | chrX:101429317-101448591  | 52.1091 | 60.5989 | 0.2178  | 0.048298 |
| <i>Mid1</i>          | chrX:169685198-170005736  | 0.9175  | 1.3330  | 0.5389  | 0.098942 |
| <i>Pinx1</i>         | chr14:63860311-63919859   | 10.1912 | 12.6687 | 0.3139  | 0.020997 |
| <i>Gm20463</i>       | chr17:34601150-34601576   | 12.9470 | 19.0397 | 0.5564  | 0.037939 |

|                      |                           |          |          |         |          |
|----------------------|---------------------------|----------|----------|---------|----------|
| <i>Dcbld2</i>        | chr16:58408442-58469727   | 1.3260   | 1.7966   | 0.4381  | 0.115038 |
| <i>Fam78a</i>        | chr2:32050054-32084857    | 79.2368  | 69.4542  | -0.1901 | 0.012151 |
| <i>Ptpn12</i>        | chr5:20986644-21055911    | 11.5231  | 13.4213  | 0.2200  | 0.018686 |
| <i>Galnt6os</i>      | chr15:100695779-100704896 | 19.9603  | 15.8000  | -0.3372 | 0.031893 |
| <i>Psme1</i>         | chr14:55578122-55581529   | 157.3530 | 182.2715 | 0.2121  | 0.054485 |
| <i>Pgm2</i>          | chr4:99929413-99987294    | 12.9334  | 15.1385  | 0.2271  | 0.024996 |
| <i>Tspan31</i>       | chr10:127067316-127070261 | 14.4985  | 17.3633  | 0.2601  | 0.022405 |
| <i>Klf11</i>         | chr12:24651370-24662774   | 4.6775   | 6.3706   | 0.4457  | 0.083560 |
| <i>Klf6</i>          | chr13:5861488-5870393     | 59.5700  | 70.8247  | 0.2497  | 0.070782 |
| <i>Spns1</i>         | chr7:126370059-126377450  | 14.8765  | 12.2386  | -0.2816 | 0.029379 |
| <i>Tmem209</i>       | chr6:30479052-30509783    | 11.2622  | 12.5833  | 0.1600  | 0.009993 |
| <i>Acpp</i>          | chr9:104288250-104337728  | 3.3467   | 2.4995   | -0.4211 | 0.058061 |
| <i>Letm2</i>         | chr8:25578491-25597487    | 8.1992   | 9.8301   | 0.2617  | 0.003342 |
| <i>Hist1h4f</i>      | chr13:23551257-23551648   | 23.1377  | 30.8262  | 0.4139  | 0.072505 |
| <i>A930038B10Rik</i> | chr14:34759401-34770553   | 0.9317   | 0.6098   | -0.6116 | 0.053707 |
| <i>Ube4bos1</i>      | chr4:149347884-149365277  | 3.3855   | 2.5504   | -0.4086 | 0.004795 |
| <i>Kcnh3</i>         | chr15:99224975-99242817   | 1.4143   | 0.8968   | -0.6573 | 0.021263 |
| <i>Xcl1</i>          | chr1:164931643-164935527  | 37.3514  | 51.3279  | 0.4586  | 0.103832 |
| <i>Trav9-2</i>       | chr14:53591079-53591514   | 6.0422   | 3.1815   | -0.9254 | 0.031875 |
| <i>Ap1s3</i>         | chr1:79606875-79671972    | 1.3431   | 1.9174   | 0.5136  | 0.027811 |
| <i>lfng</i>          | chr10:118441046-118445892 | 0.8557   | 1.7971   | 1.0704  | 0.071032 |
| <i>Odc1</i>          | chr12:17544872-17551502   | 12.4662  | 14.9142  | 0.2587  | 0.043775 |
| <i>Hist1h2bc</i>     | chr13:23684198-23692488   | 17.8226  | 23.6172  | 0.4061  | 0.096916 |
| <i>Adam22</i>        | chr5:8072351-8368160      | 0.4242   | 0.6323   | 0.5760  | 0.110186 |
| <i>Acacb</i>         | chr5:114146534-114250761  | 0.2751   | 0.1597   | -0.7842 | 0.014607 |
| <i>Ube2h</i>         | chr6:30211288-30304539    | 24.0017  | 20.9500  | -0.1962 | 0.001481 |
| <i>S1pr5</i>         | chr9:21242911-21248443    | 0.6711   | 1.3574   | 1.0163  | 0.125919 |
| <i>Zc3h3</i>         | chr15:75754431-75841915   | 0.7272   | 0.4031   | -0.8511 | 0.027149 |
| <i>H2-Q10</i>        | chr17:35470088-35474563   | 1.0731   | 1.6518   | 0.6222  | 0.094899 |
| <i>Tlk1</i>          | chr2:70712406-70825728    | 25.1164  | 28.4678  | 0.1807  | 0.026614 |
| <i>Tdo2</i>          | chr3:81957089-81975750    | 1.4266   | 2.0111   | 0.4954  | 0.041405 |
| <i>Pigv</i>          | chr4:133660386-133672647  | 8.3584   | 6.9043   | -0.2757 | 0.018436 |
| <i>Kctd18</i>        | chr1:57955100-58018956    | 5.9317   | 6.7559   | 0.1877  | 0.041100 |
| <i>4933427G23Rik</i> | chr5:23815617-23831897    | 1.0973   | 0.6196   | -0.8246 | 0.032625 |
| <i>Plk1</i>          | chr7:122159436-122169875  | 1.3701   | 2.1440   | 0.6460  | 0.080277 |
| <i>Mphosph6</i>      | chr8:117791644-117801929  | 11.6715  | 15.0672  | 0.3684  | 0.060139 |
| <i>Spin2c</i>        | chrX:153832224-153834243  | 6.4663   | 8.3741   | 0.3730  | 0.027558 |
| <i>Sh3pxd2a</i>      | chr19:47260173-47464411   | 6.6753   | 5.6279   | -0.2462 | 0.021450 |
| <i>Rabgap1l</i>      | chr1:160219173-160792938  | 18.4180  | 20.9673  | 0.1870  | 0.047875 |
| <i>Henmt1</i>        | chr3:108940083-108960773  | 0.3184   | 0.7309   | 1.1989  | 0.024186 |
| <i>Dnajc8</i>        | chr4:132535549-132553742  | 56.5672  | 68.3739  | 0.2735  | 0.079700 |
| <i>Klra10</i>        | chr6:130269193-130281928  | 1.2191   | 2.2265   | 0.8690  | 0.009019 |
| <i>Snord22</i>       | chr19:8725865-8725991     | 178.1292 | 90.6938  | -0.9738 | 0.080250 |
| <i>Nfe2l2</i>        | chr2:75675512-75704641    | 23.3039  | 25.8621  | 0.1503  | 0.003803 |
| <i>Ggt1</i>          | chr10:75561603-75586200   | 35.6646  | 29.2890  | -0.2841 | 0.048674 |
| <i>Txnrd1</i>        | chr10:82859205-82897724   | 26.1849  | 22.8684  | -0.1954 | 0.002553 |
| <i>Trim17</i>        | chr11:58954684-58973098   | 11.2902  | 13.2431  | 0.2302  | 0.038664 |
| <i>Slc16a10</i>      | chr10:40033534-40142254   | 2.2915   | 1.7261   | -0.4088 | 0.020861 |
| <i>Mpr1p</i>         | chr11:59661304-59780860   | 6.4671   | 5.5730   | -0.2147 | 0.009012 |
| <i>Hist1h2bb</i>     | chr13:23746733-23747202   | 53.3761  | 65.3977  | 0.2930  | 0.069781 |
| <i>Anapc7</i>        | chr5:122421692-122444912  | 9.2324   | 7.8252   | -0.2386 | 0.007374 |
| <i>Zw10</i>          | chr9:49055580-49078772    | 21.6226  | 18.0954  | -0.2569 | 0.028600 |
| <i>Als2cl</i>        | chr9:110879869-110900530  | 91.4006  | 77.0813  | -0.2458 | 0.030800 |
| <i>Actr1b</i>        | chr1:36699201-36714422    | 26.4440  | 22.9842  | -0.2023 | 0.001641 |
| <i>Dtwd1</i>         | chr2:126152140-126165279  | 5.7146   | 7.6349   | 0.4180  | 0.036394 |
| <i>Tspan1</i>        | chr4:116161868-116167601  | 0.5252   | 0.9458   | 0.8488  | 0.056120 |
| <i>Rps15a-ps3</i>    | chr4:150847112-150847507  | 9.0418   | 4.7456   | -0.9300 | 0.050654 |
| <i>Gm15777</i>       | chr5:100670858-100678105  | 5.4813   | 7.5858   | 0.4688  | 0.031313 |
| <i>Rnf135</i>        | chr11:80183850-80199757   | 4.2305   | 3.1355   | -0.4321 | 0.017308 |
| <i>Zfp455</i>        | chr13:67194505-67209298   | 2.8984   | 3.7631   | 0.3767  | 0.035264 |
| <i>Rasgrf2</i>       | chr13:91880399-92131656   | 0.7607   | 1.2266   | 0.6893  | 0.125208 |
| <i>Enc1</i>          | chr13:97241104-97253039   | 11.4922  | 9.9216   | -0.2120 | 0.001570 |
| <i>Junb</i>          | chr8:84976908-84978748    | 74.5619  | 94.1545  | 0.3366  | 0.112764 |
| <i>Enpp4</i>         | chr17:44096307-44105809   | 12.7195  | 10.3879  | -0.2921 | 0.045765 |
| <i>Gm10505</i>       | chr17:27342459-27344825   | 1.4675   | 2.1785   | 0.5700  | 0.000769 |
| <i>Mdfic</i>         | chr6:15720660-15802165    | 1.0517   | 1.4891   | 0.5017  | 0.127414 |
| <i>Tpm3-rs7</i>      | chr14:113314607-113316713 | 4.7155   | 6.9282   | 0.5551  | 0.099434 |
| <i>Med20</i>         | chr17:47611581-47624418   | 15.4217  | 12.9500  | -0.2520 | 0.029925 |
| <i>Tnk2</i>          | chr16:32643873-32683493   | 11.3804  | 9.1536   | -0.3141 | 0.059336 |
| <i>Cxadr</i>         | chr16:78301495-78359785   | 0.8708   | 1.2216   | 0.4883  | 0.076497 |
| <i>lfit3</i>         | chr19:34583530-34588731   | 19.5948  | 39.9280  | 1.0269  | 0.040431 |

|                      |                           |          |          |         |          |
|----------------------|---------------------------|----------|----------|---------|----------|
| <i>Ttpal</i>         | chr2:163602313-163619013  | 18.3585  | 15.6658  | -0.2288 | 0.021542 |
| <i>Otud6b</i>        | chr4:14809497-14826587    | 9.2195   | 11.3048  | 0.2942  | 0.044022 |
| <i>Ptbp3</i>         | chr4:59471867-59549364    | 90.1409  | 103.3829 | 0.1977  | 0.037784 |
| <i>Traj21</i>        | chr14:54198789-54198846   | 224.2993 | 294.1778 | 0.3913  | 0.072112 |
| <i>FrmD8</i>         | chr19:5849701-5875274     | 41.9311  | 36.2132  | -0.2115 | 0.015201 |
| <i>Mmps36</i>        | chr13:100735954-100744659 | 2.8045   | 4.2032   | 0.5837  | 0.046245 |
| <i>Ccdc34</i>        | chr2:110017816-110173360  | 1.0773   | 1.4274   | 0.4060  | 0.037169 |
| <i>Zfp39</i>         | chr11:58888152-58904225   | 10.8100  | 13.0642  | 0.2733  | 0.057620 |
| <i>Polg</i>          | chr7:79448790-79466362    | 18.6150  | 16.2240  | -0.1983 | 0.010713 |
| <i>Tenn1</i>         | chrX:42527865-43429126    | 0.2224   | 0.3391   | 0.6088  | 0.145766 |
| <i>Gm7008</i>        | chr12:40222757-40229184   | 5.4224   | 7.4229   | 0.4531  | 0.048949 |
| <i>Ly6c2</i>         | chr15:75108159-75111684   | 296.2021 | 445.4554 | 0.5887  | 0.053334 |
| <i>B3gnt5</i>        | chr16:19760207-19772753   | 14.3960  | 16.6640  | 0.2111  | 0.069634 |
| <i>Gm10814</i>       | chr19:6012619-6018426     | 10.6477  | 8.3941   | -0.3431 | 0.027994 |
| <i>Lactb2</i>        | chr1:13624844-13660546    | 10.9753  | 12.6398  | 0.2037  | 0.007518 |
| <i>Rsrc1</i>         | chr3:66981389-67358396    | 3.3286   | 3.9876   | 0.2606  | 0.048615 |
| <i>Ccr9</i>          | chr9:123678438-123783457  | 54.9219  | 40.6154  | -0.4354 | 0.130088 |
| <i>Nelfb</i>         | chr2:25199711-25211489    | 30.5064  | 26.6080  | -0.1973 | 0.006267 |
| <i>Gm16372</i>       | chr12:24493206-24493656   | 3.1580   | 5.7479   | 0.8640  | 0.076937 |
| <i>Gm9887</i>        | chr12:69371834-69372458   | 18.0082  | 13.5986  | -0.4052 | 0.018636 |
| <i>H3f3a</i>         | chr1:180800831-180813943  | 12.8015  | 20.3794  | 0.6708  | 0.063961 |
| <i>Pwp2</i>          | chr10:78170909-78185149   | 23.4306  | 20.0368  | -0.2257 | 0.014432 |
| <i>1700110K17Rik</i> | chr9:40323425-40343564    | 6.0725   | 8.2453   | 0.4413  | 0.048675 |
| <i>Gemin2</i>        | chr12:59013392-59028470   | 6.1592   | 4.8001   | -0.3597 | 0.014310 |
| <i>Bre</i>           | chr5:31697683-32084962    | 8.4418   | 9.8429   | 0.2215  | 0.040553 |
| <i>Cecr6</i>         | chr6:120488938-120493807  | 0.2261   | 0.3880   | 0.7790  | 0.000795 |
| <i>Ap1m2</i>         | chr9:21295456-21312333    | 2.7887   | 1.6153   | -0.7878 | 0.056836 |
| <i>Traj23</i>        | chr14:54196080-54196140   | 113.7525 | 153.1247 | 0.4288  | 0.048882 |
| <i>Pydc4</i>         | chr1:173566283-173599274  | 60.5025  | 74.4638  | 0.2995  | 0.132668 |
| <i>Gm6225</i>        | chr18:3336415-3366863     | 1.5746   | 2.3462   | 0.5753  | 0.018715 |
| <i>Lrrcc1</i>        | chr3:14533787-14572658    | 7.2680   | 8.3754   | 0.2046  | 0.036283 |
| <i>Ascl4</i>         | chr10:85928490-85946206   | 7.5866   | 9.7295   | 0.3589  | 0.041854 |
| <i>H3f3b</i>         | chr11:116021911-116027962 | 53.8585  | 67.0889  | 0.3169  | 0.144320 |
| <i>Engase</i>        | chr11:118476828-118489209 | 2.4656   | 1.9121   | -0.3668 | 0.013611 |
| <i>Ppwd1</i>         | chr13:104205120-104228844 | 11.6555  | 13.5690  | 0.2193  | 0.018542 |
| <i>1600020E01Rik</i> | chr6:86526270-86564442    | 21.0369  | 16.8197  | -0.3228 | 0.054495 |
| <i>Gm20650</i>       | chr7:126891621-126897236  | 15.7588  | 10.0730  | -0.6457 | 0.001880 |
| <i>Gm28047</i>       | chr15:102536653-102625421 | 4.4557   | 5.6837   | 0.3512  | 0.092628 |
| <i>2810408M09Rik</i> | chr2:165490109-165493324  | 9.4968   | 7.4538   | -0.3495 | 0.029033 |
| <i>Trim59</i>        | chr3:69035287-69044755    | 15.7889  | 20.1028  | 0.3485  | 0.169822 |
| <i>Wrap73</i>        | chr4:154142371-154167420  | 8.6830   | 7.3068   | -0.2490 | 0.005732 |
| <i>Gm15738</i>       | chr16:13384173-13404686   | 1.9124   | 0.8776   | -1.1238 | 0.000376 |
| <i>Gm9985</i>        | chr10:75590141-75590653   | 4.7177   | 7.0389   | 0.5773  | 0.006591 |
| <i>Zfp386</i>        | chr12:116047723-116063360 | 25.6412  | 28.6742  | 0.1613  | 0.024492 |
| <i>Nt5e</i>          | chr9:88327608-88372089    | 32.4330  | 39.0798  | 0.2690  | 0.107602 |
| <i>Slc39a2</i>       | chr14:51892888-51896745   | 1.0651   | 0.6867   | -0.6333 | 0.013054 |
| <i>Myb</i>           | chr10:21124929-21160984   | 25.1026  | 30.1542  | 0.2645  | 0.094231 |
| <i>Tsen54</i>        | chr11:115814723-115823094 | 8.5077   | 6.8473   | -0.3132 | 0.011343 |
| <i>Gm14636</i>       | chrX:19156980-19167241    | 0.3863   | 0.6221   | 0.6876  | 0.122981 |
| <i>Gm15821</i>       | chr17:34211311-34214459   | 46.7571  | 39.3156  | -0.2501 | 0.035120 |
| <i>Itgb7</i>         | chr15:102215994-102231935 | 289.9482 | 247.3298 | -0.2294 | 0.053105 |
| <i>Gm19557</i>       | chr19:47512981-47516578   | 4.9590   | 6.2584   | 0.3357  | 0.059690 |
| <i>Tjrc</i>          | chr16:32608919-32632794   | 27.9693  | 23.2178  | -0.2686 | 0.057349 |
| <i>Ganab</i>         | chr19:8898089-8916663     | 56.2945  | 48.3021  | -0.2209 | 0.038636 |
| <i>Spata5l1</i>      | chr2:122630624-122632930  | 10.5917  | 7.9882   | -0.4070 | 0.062280 |
| <i>Gm16033</i>       | chr11:46143782-46147116   | 20.4285  | 14.5516  | -0.4894 | 0.094959 |
| <i>Ikzf3</i>         | chr11:98464901-98546031   | 19.4252  | 23.2807  | 0.2612  | 0.126531 |
| <i>Brf1</i>          | chr12:112959861-113000621 | 40.2057  | 34.6361  | -0.2151 | 0.017335 |
| <i>TcrG-C2</i>       | chr13:19305059-19307551   | 7.8856   | 12.2398  | 0.6343  | 0.090335 |
| <i>Sh3bp2</i>        | chr5:34525837-34563638    | 2.9008   | 3.7792   | 0.3816  | 0.070261 |
| <i>Fbxo21</i>        | chr5:117976769-118010191  | 9.9162   | 8.3737   | -0.2439 | 0.008476 |
| <i>Iqcd</i>          | chr5:120589015-120607114  | 1.8338   | 1.1544   | -0.6677 | 0.005696 |
| <i>Klra8</i>         | chr6:130115225-130129898  | 1.0848   | 2.3943   | 1.1422  | 0.106457 |
| <i>Podnl1</i>        | chr8:84125988-84132527    | 6.0656   | 4.9184   | -0.3025 | 0.015101 |
| <i>Zfp706</i>        | chr15:36997030-37007402   | 12.3246  | 10.3321  | -0.2544 | 0.025962 |
| <i>A930015D03Rik</i> | chr17:35994452-36038435   | 14.3312  | 10.3617  | -0.4679 | 0.084574 |
| <i>B230216N24Rik</i> | chr1:98031115-98057680    | 0.4688   | 0.8302   | 0.8244  | 0.137242 |
| <i>Tsn</i>           | chr1:118298516-118311132  | 43.5720  | 36.4040  | -0.2593 | 0.041257 |
| <i>Rpl30-ps3</i>     | chr2:90747615-90747963    | 8.5774   | 12.4191  | 0.5340  | 0.028018 |
| <i>Gm26165</i>       | chr2:144261588-144261726  | 18.1592  | 9.9626   | -0.8661 | 0.047329 |
| <i>Nfs1</i>          | chr2:156078928-156144186  | 16.1498  | 13.7440  | -0.2327 | 0.020542 |

|               |                           |          |          |         |          |
|---------------|---------------------------|----------|----------|---------|----------|
| Gm17275       | chr1:180802567-180809483  | 22.0718  | 33.4304  | 0.5990  | 0.062944 |
| Prr11         | chr11:87089152-87108708   | 0.2146   | 0.4883   | 1.1862  | 0.215825 |
| Gm20319       | chr16:26714445-26755502   | 1.7410   | 2.7801   | 0.6753  | 0.048993 |
| Tg            | chr15:66670752-66850721   | 0.1922   | 0.3040   | 0.6611  | 0.019195 |
| Prkce         | chr17:86167784-86657919   | 0.7709   | 1.0493   | 0.4449  | 0.049714 |
| March3        | chr18:56761715-56925548   | 0.3629   | 0.5798   | 0.6759  | 0.070592 |
| B230398E01Rik | chr3:94959033-94962048    | 8.2790   | 9.8147   | 0.2455  | 0.008485 |
| Herc6         | chr6:57580991-57665136    | 18.6090  | 22.4652  | 0.2717  | 0.106833 |
| Sp25          | chr2:69193894-69206194    | 1.2048   | 1.7543   | 0.5421  | 0.071970 |
| Pld2          | chr11:70540063-70558110   | 0.7108   | 0.9815   | 0.4655  | 0.025548 |
| Coro1a        | chr7:126699772-126707787  | 561.0481 | 475.4475 | -0.2388 | 0.042968 |
| Fam219b       | chr9:57537527-57543187    | 14.8849  | 12.5196  | -0.2497 | 0.010363 |
| Phf11a        | chr14:59276912-59297522   | 2.1432   | 3.2701   | 0.6096  | 0.073893 |
| Gm16464       | chr7:104501054-104502149  | 1.9416   | 3.0926   | 0.6716  | 0.053783 |
| Tmem123       | chr9:7764040-7794333      | 68.9175  | 80.1693  | 0.2182  | 0.062268 |
| Ilvbl         | chr10:78574499-78584498   | 23.3966  | 19.9266  | -0.2316 | 0.010946 |
| Gn11          | chr17:35979850-35989462   | 19.8570  | 16.8963  | -0.2329 | 0.016613 |
| 5430427019Rik | chrX:85870353-85891499    | 2.5501   | 3.6560   | 0.5197  | 0.114973 |
| Cbx6          | chr15:79823895-79834688   | 6.3410   | 5.2957   | -0.2599 | 0.032874 |
| Daxx          | chr17:33909413-33915589   | 36.5027  | 41.4663  | 0.1839  | 0.064772 |
| Cep57         | chr9:13807791-13827107    | 16.5037  | 18.4944  | 0.1643  | 0.011902 |
| March9        | chr10:127055010-127060184 | 1.7063   | 1.1394   | -0.5825 | 0.047701 |
| Erlc1         | chr11:30930773-30954335   | 5.6470   | 7.0270   | 0.3154  | 0.106840 |
| Tmed8         | chr12:87166241-87200229   | 11.1252  | 9.4962   | -0.2284 | 0.033693 |
| Ankdd1b       | chr13:96416133-96471198   | 0.6699   | 1.0395   | 0.6339  | 0.046356 |
| Vps9d1        | chr8:123242355-123254348  | 5.2185   | 4.3567   | -0.2604 | 0.008215 |
| Sun2          | chr15:79724069-79742536   | 135.5991 | 117.3110 | -0.2090 | 0.047281 |
| Srsf11        | chr3:158010472-158036639  | 30.3481  | 33.2320  | 0.1310  | 0.007002 |
| Anapc10       | chr8:79711819-79777321    | 4.2617   | 5.3536   | 0.3291  | 0.051549 |
| Ndufs5        | chr4:123712709-123718202  | 3.5518   | 2.2278   | -0.6729 | 0.007060 |
| Trp53i13      | chr11:77508098-77515980   | 6.0872   | 4.7329   | -0.3630 | 0.024275 |
| Sirt3         | chr7:140863669-140882309  | 6.7969   | 5.3387   | -0.3484 | 0.000640 |
| Traj33        | chr14:54185357-54185414   | 47.5120  | 27.9275  | -0.7666 | 0.034163 |
| Mapre2        | chr18:23752332-23893861   | 1.7766   | 2.2914   | 0.3671  | 0.134204 |
| Ctnnb1        | chr9:120929215-120960507  | 84.4383  | 73.4158  | -0.2018 | 0.027789 |
| AU041133      | chr10:82138252-82152011   | 9.0831   | 6.9715   | -0.3817 | 0.039368 |
| B3galnt2      | chr13:13954673-13999068   | 29.6406  | 24.4172  | -0.2797 | 0.067822 |
| Polk          | chr13:96480688-96542485   | 7.3979   | 8.6133   | 0.2194  | 0.038027 |
| Gm5963        | chr16:35573316-35573556   | 6.2332   | 2.9687   | -1.0701 | 0.031691 |
| Cables1       | chr18:11839219-11945627   | 0.1708   | 0.3460   | 1.0184  | 0.008430 |
| mt-Tm         | chrM:3844-3913            | 8.8078   | 18.6744  | 1.0842  | 0.078331 |
| mt-Tc         | chrM:5191-5257            | 542.6304 | 671.0401 | 0.3064  | 0.125508 |
| Mettl21c      | chr1:44009407-44020034    | 1.3136   | 1.7584   | 0.4208  | 0.058800 |
| Cd84          | chr1:171839696-171890718  | 33.9127  | 37.9873  | 0.1637  | 0.051740 |
| Cyfp1         | chr7:55841744-55930700    | 0.7436   | 0.9429   | 0.3425  | 0.002236 |
| Klh25         | chr7:75848337-75874130    | 14.9332  | 12.3322  | -0.2761 | 0.038492 |
| Ptp4a1        | chr1:30940302-30949770    | 1.1560   | 1.6156   | 0.4830  | 0.114407 |
| Cstad         | chr2:30595039-30608943    | 0.7579   | 1.4360   | 0.9220  | 0.045506 |
| Mir15b        | chr3:69009755-69009853    | 39.7152  | 21.9932  | -0.8526 | 0.086661 |
| Gm16740       | chr3:95217456-95226658    | 12.5342  | 9.7560   | -0.3615 | 0.012078 |
| Snrb          | chr2:130171413-130179403  | 68.9310  | 58.6884  | -0.2321 | 0.029408 |
| Nfkbid        | chr7:30421731-30428746    | 31.0383  | 26.8300  | -0.2102 | 0.012478 |
| Sytl2         | chr7:90348698-90410438    | 3.0657   | 3.8187   | 0.3168  | 0.105816 |
| Cd3e          | chr9:44998742-45009590    | 66.6217  | 80.6414  | 0.2755  | 0.148559 |
| Gm19684       | chr17:36121677-36129692   | 2.8219   | 1.8596   | -0.6017 | 0.051688 |
| NA            | chr1:143605161-143606608  | 4.0422   | 5.7458   | 0.5074  | 0.142148 |
| Gm1826        | chr2:87393482-87394644    | 1.2236   | 2.0685   | 0.7574  | 0.050640 |
| A830005F24Rik | chr13:48513569-48514859   | 1.0290   | 2.0108   | 0.9664  | 0.052844 |
| Vamp8         | chr6:72385222-72390703    | 19.6739  | 22.6941  | 0.2060  | 0.036085 |
| Laptm4a       | chr12:8921663-8938742     | 43.0058  | 48.1074  | 0.1617  | 0.023797 |
| Slc36a4       | chr9:15709737-15742384    | 0.9470   | 1.3602   | 0.5224  | 0.114205 |
| Pim3          | chr15:88862185-88865718   | 10.3397  | 8.5497   | -0.2743 | 0.009201 |
| Drc1          | chr5:30281387-30366708    | 9.4168   | 6.7977   | -0.4702 | 0.107794 |
| Hmgcl         | chr4:135946447-135962617  | 7.4828   | 6.0621   | -0.3037 | 0.015203 |
| Ormdl3        | chr11:98581255-98587368   | 15.3313  | 13.0333  | -0.2343 | 0.001448 |
| O610009L18Rik | chr11:120348677-120351190 | 8.8390   | 6.1800   | -0.5163 | 0.025657 |
| Gm22513       | chr12:54696781-54696945   | 24.7899  | 13.5617  | -0.8702 | 0.129575 |
| Hist1h2bf     | chr13:23573735-23574196   | 4.6240   | 7.2650   | 0.6518  | 0.052513 |
| Hist1h3a      | chr13:23761852-23762386   | 9.9065   | 13.1820  | 0.4121  | 0.045173 |
| Abcb9         | chr5:124061529-124095798  | 8.4344   | 6.8704   | -0.2959 | 0.076458 |
| Trbj1-5       | chr6:41535083-41535133    | 143.4375 | 97.8930  | -0.5511 | 0.078760 |

|                      |                           |          |          |         |          |
|----------------------|---------------------------|----------|----------|---------|----------|
| <i>Lag3</i>          | chr6:124904360-124911705  | 1.0826   | 2.1333   | 0.9786  | 0.203005 |
| <i>Uevld</i>         | chr7:46923538-46958527    | 0.8799   | 1.1716   | 0.4131  | 0.068984 |
| <i>Cyp4v3</i>        | chr8:45269670-45333216    | 2.9867   | 3.5336   | 0.2426  | 0.027219 |
| <i>Gm24357</i>       | chr9:15315521-15315595    | 63.0892  | 38.8606  | -0.6991 | 0.120380 |
| <i>Cd3d</i>          | chr9:44981792-44987052    | 232.7761 | 194.9592 | -0.2558 | 0.047137 |
| <i>U2surp</i>        | chr9:95456893-95511996    | 32.0277  | 36.1495  | 0.1747  | 0.040655 |
| <i>Il7r</i>          | chr15:9506160-9529876     | 195.2619 | 218.2785 | 0.1608  | 0.085673 |
| <i>Amacr</i>         | chr15:10981755-10996624   | 2.2386   | 1.5501   | -0.5302 | 0.023173 |
| <i>Atf4</i>          | chr15:80255183-80257540   | 95.5091  | 108.2011 | 0.1800  | 0.055420 |
| <i>Tob2</i>          | chr15:81848269-81858326   | 12.3101  | 9.9340   | -0.3094 | 0.092199 |
| <i>Kpna3</i>         | chr14:61365185-61439947   | 13.4998  | 15.2890  | 0.1796  | 0.017257 |
| <i>Tbc1d10c</i>      | chr19:4184357-4191047     | 239.5217 | 211.0951 | -0.1823 | 0.016988 |
| <i>Traf2</i>         | chr2:25517981-25546940    | 12.1199  | 10.5864  | -0.1952 | 0.000736 |
| <i>Klf5c</i>         | chr2:49619297-49774778    | 1.1090   | 1.5462   | 0.4795  | 0.142841 |
| <i>Elp4</i>          | chr2:105697319-105904564  | 2.5316   | 3.0579   | 0.2725  | 0.070448 |
| <i>Rnu73b</i>        | chr3:86140617-86140688    | 40.9492  | 24.7735  | -0.7250 | 0.040110 |
| <i>Dnaja1</i>        | chr4:40722149-40737149    | 16.7774  | 12.7760  | -0.3931 | 0.163577 |
| <i>Gtpbp6</i>        | chr5:110103974-110108197  | 14.0689  | 11.9426  | -0.2364 | 0.012709 |
| <i>Ccdc142</i>       | chr6:83101616-83109939    | 10.5882  | 9.0726   | -0.2229 | 0.006312 |
| <i>Gm11974</i>       | chr11:6525590-6528760     | 22.3768  | 18.1511  | -0.3019 | 0.034956 |
| <i>Cd38</i>          | chr5:43868808-43912375    | 1.9859   | 3.1181   | 0.6508  | 0.136951 |
| <i>Gm15739</i>       | chr5:146248550-146249422  | 0.9457   | 1.7652   | 0.9004  | 0.018097 |
| <i>Gnpat</i>         | chr8:124863032-124890057  | 28.3030  | 24.3044  | -0.2197 | 0.042168 |
| <i>Taf9b</i>         | chrX:106206882-106221158  | 7.9968   | 9.4950   | 0.2478  | 0.042374 |
| <i>4632404H12Rik</i> | chr3:89767510-89773240    | 8.7703   | 7.0809   | -0.3087 | 0.040274 |
| <i>Gm18856</i>       | chr13:13964486-13965860   | 0.4748   | 0.9492   | 0.9995  | 0.006552 |
| <i>Myd88</i>         | chr9:119335933-119341411  | 26.2995  | 22.4784  | -0.2265 | 0.029817 |
| <i>Rufy1</i>         | chr11:50389285-50431125   | 11.2767  | 9.2401   | -0.2874 | 0.025235 |
| <i>Zfp335</i>        | chr2:164891881-164911757  | 20.8627  | 18.0578  | -0.2083 | 0.034097 |
| <i>Gabpb1</i>        | chr2:126627441-126676337  | 7.6019   | 8.5157   | 0.1638  | 0.018952 |
| <i>Rpf2</i>          | chr10:40223245-40247036   | 20.7367  | 24.1375  | 0.2191  | 0.058620 |
| <i>Art2b</i>         | chr7:101578859-101581161  | 85.4629  | 68.3595  | -0.3222 | 0.080099 |
| <i>Rassf5</i>        | chr1:131176409-131245258  | 88.3565  | 78.0960  | -0.1781 | 0.016417 |
| <i>Fgd3</i>          | chr13:49261553-49320311   | 26.2310  | 23.1464  | -0.1805 | 0.015625 |
| <i>Gm24060</i>       | chr11:118180940-118181035 | 29.0432  | 18.1190  | -0.6807 | 0.021587 |
| <i>Traf4</i>         | chr11:78158498-78165589   | 12.3939  | 10.2889  | -0.2685 | 0.028786 |
| <i>Plek</i>          | chr11:16971205-17052381   | 11.0154  | 20.8784  | 0.9225  | 0.065607 |
| <i>Wdr95</i>         | chr5:149528678-149611894  | 1.0977   | 1.7163   | 0.6448  | 0.087303 |
| <i>2900076A07Rik</i> | chr7:81523549-81531498    | 18.4783  | 15.0435  | -0.2967 | 0.060898 |
| <i>Vma21</i>         | chrX:71815923-71839757    | 1.4353   | 1.8478   | 0.3644  | 0.087362 |
| <i>C130026I21Rik</i> | chr1:84992689-85270566    | 1.4914   | 2.1870   | 0.5523  | 0.114602 |
| <i>1700001O22Rik</i> | chr2:30794768-30803661    | 0.3375   | 0.7106   | 1.0743  | 0.114719 |
| <i>Trav10n</i>       | chr14:53122113-53122610   | 1.8785   | 3.7414   | 0.9940  | 0.038066 |
| <i>Acadl</i>         | chr1:66830838-66863277    | 14.0954  | 16.0730  | 0.1894  | 0.005586 |
| <i>Fam120aas</i>     | chr13:48968286-48972031   | 10.4882  | 12.5946  | 0.2640  | 0.036747 |
| <i>D030056L22Rik</i> | chr19:18713192-18718428   | 12.4326  | 9.9355   | -0.3235 | 0.035773 |
| <i>Nrarp</i>         | chr2:25180757-25183330    | 3.5116   | 5.1376   | 0.5490  | 0.122908 |
| <i>Zbtb46</i>        | chr2:181387761-181459426  | 2.1648   | 2.6350   | 0.2836  | 0.077324 |
| <i>Gm23130</i>       | chr10:23786469-23786543   | 76.6401  | 98.5611  | 0.3629  | 0.010078 |
| <i>Tmtc2</i>         | chr10:105187662-105574451 | 0.1781   | 0.0841   | -1.0825 | 0.036143 |
| <i>Gm27019</i>       | chr6:31063091-31063495    | 2.9776   | 5.7753   | 0.9557  | 0.096327 |
| <i>Cpne2</i>         | chr8:94532989-94570529    | 0.2268   | 0.4380   | 0.9497  | 0.044213 |
| <i>Gm5637</i>        | chrX:60045110-60046229    | 2.4957   | 1.5475   | -0.6894 | 0.015043 |
| <i>Slc10a3</i>       | chrX:74369216-74373349    | 15.3404  | 17.9908  | 0.2299  | 0.060646 |
| <i>Ttc5</i>          | chr14:50765414-50785518   | 27.1259  | 22.6912  | -0.2575 | 0.032877 |
| <i>Ifit2</i>         | chr19:34550693-34576419   | 19.7209  | 23.3204  | 0.2419  | 0.103296 |
| <i>Usp8</i>          | chr2:126707327-126759297  | 30.1004  | 33.3272  | 0.1469  | 0.023543 |
| <i>Rpf1</i>          | chr3:146506347-146521423  | 70.5850  | 79.8599  | 0.1781  | 0.035033 |
| <i>Rps6</i>          | chr4:86854659-86857412    | 8.5971   | 10.4252  | 0.2781  | 0.038011 |
| <i>Tusc1</i>         | chr4:93334147-93335511    | 2.1139   | 1.2905   | -0.7120 | 0.042071 |
| <i>Dhdds</i>         | chr4:133969027-134000918  | 7.6751   | 6.4900   | -0.2420 | 0.002598 |
| <i>Obscn</i>         | chr11:58994255-59136402   | 0.0182   | 0.0409   | 1.1697  | 0.131355 |
| <i>Tpi1</i>          | chr6:124810585-124814296  | 19.9478  | 24.6980  | 0.3082  | 0.139048 |
| <i>Lrrc42</i>        | chr4:107233513-107253532  | 8.0486   | 6.5186   | -0.3042 | 0.015270 |
| <i>B3galt6</i>       | chr4:155989465-155992678  | 7.1494   | 5.9044   | -0.2760 | 0.010695 |
| <i>4930481A15Rik</i> | chr19:5406739-5422847     | 4.5620   | 5.7527   | 0.3346  | 0.057123 |
| <i>Klf1b</i>         | chr4:149176318-149307693  | 12.9356  | 15.5213  | 0.2629  | 0.150563 |
| <i>Smim7</i>         | chr8:72565187-72571088    | 16.6725  | 14.0277  | -0.2492 | 0.028523 |
| <i>Gm15585</i>       | chr16:17092814-17096350   | 6.1470   | 3.9949   | -0.6217 | 0.059563 |
| <i>Gm12000</i>       | chr11:11695132-11696439   | 34.7109  | 27.5628  | -0.3327 | 0.049178 |
| <i>Gm16201</i>       | chr7:139950395-139978977  | 0.3961   | 0.1878   | -1.0767 | 0.017070 |

|                      |                           |          |          |         |          |
|----------------------|---------------------------|----------|----------|---------|----------|
| <i>Tecpr1</i>        | chr5:144194441-144223615  | 36.2197  | 31.6508  | -0.1945 | 0.039677 |
| <i>Coa6</i>          | chr8:126422500-126425434  | 16.6664  | 12.9368  | -0.3655 | 0.029423 |
| <i>Gm6969</i>        | chr12:24638668-24639010   | 4.5157   | 2.1759   | -1.0534 | 0.052101 |
| <i>Hist1h1e</i>      | chr13:23621754-23622502   | 147.2909 | 171.2414 | 0.2174  | 0.100641 |
| <i>Tmed9</i>         | chr13:55593134-55597663   | 49.4053  | 42.3476  | -0.2224 | 0.031824 |
| <i>Ube2k</i>         | chr5:65537232-65598988    | 10.3111  | 13.5512  | 0.3942  | 0.131095 |
| <i>Atp5sl</i>        | chr7:25619413-25625551    | 18.9700  | 21.2930  | 0.1667  | 0.026922 |
| <i>Fxyd5</i>         | chr7:31032721-31042481    | 114.7648 | 136.1294 | 0.2463  | 0.119653 |
| <i>G630030J09Rik</i> | chr7:31149527-31152707    | 9.6547   | 8.0888   | -0.2553 | 0.000572 |
| <i>Sult1a1</i>       | chr7:126672864-126676432  | 3.1698   | 2.1504   | -0.5597 | 0.036110 |
| <i>Cask</i>          | chrX:13517079-13851367    | 0.2292   | 0.3878   | 0.7584  | 0.070137 |
| <i>Tuba1c</i>        | chr15:99029890-99038105   | 8.8302   | 7.1907   | -0.2963 | 0.011732 |
| <i>Gm26908</i>       | chr14:70205323-70217659   | 1.7178   | 1.0589   | -0.6979 | 0.036106 |
| <i>Gpr18</i>         | chr14:121911434-121915774 | 81.6685  | 88.9609  | 0.1234  | 0.005150 |
| <i>Snx9</i>          | chr17:5841327-5931033     | 5.1599   | 6.5912   | 0.5352  | 0.083410 |
| <i>Dnase1l2</i>      | chr17:24440080-24443105   | 3.4564   | 2.6372   | -0.3903 | 0.006782 |
| <i>Fam173a</i>       | chr17:25790507-25792284   | 50.0258  | 41.1824  | -0.2806 | 0.048371 |
| <i>Znrd1as</i>       | chr17:36958591-36965622   | 2.9017   | 4.4958   | 0.6317  | 0.171019 |
| <i>Wrb</i>           | chr16:96145406-96157852   | 3.5683   | 2.9118   | -0.2933 | 0.002211 |
| <i>Cdc42bpg</i>      | chr19:6306455-6325652     | 2.3980   | 1.8180   | -0.3994 | 0.093053 |
| <i>Ms4a4b</i>        | chr19:11443552-11463549   | 164.2609 | 188.2658 | 0.1968  | 0.128537 |
| <i>Dnajb2</i>        | chr1:75236464-75244804    | 5.8687   | 7.6034   | 0.3736  | 0.041844 |
| <i>Atp1b1</i>        | chr1:164437266-164458355  | 24.7771  | 21.0266  | -0.2368 | 0.021560 |
| <i>Irf6</i>          | chr1:193153111-193172042  | 4.8378   | 5.7503   | 0.2493  | 0.092959 |
| <i>Cd74</i>          | chr18:60803847-60812646   | 8.1182   | 11.1577  | 0.4588  | 0.119632 |
| <i>9430097D07Rik</i> | chr2:32574183-32575684    | 0.6071   | 1.0505   | 0.7910  | 0.002009 |
| <i>Cerkl</i>         | chr2:79330542-79456785    | 8.1596   | 9.4879   | 0.2176  | 0.089575 |
| <i>E130215H24Rik</i> | chr2:150667493-150668935  | 11.4996  | 9.0904   | -0.3392 | 0.003230 |
| <i>Gm26841</i>       | chr2:152694732-152696692  | 16.9358  | 20.5086  | 0.2761  | 0.094791 |
| <i>Gm11427</i>       | chr11:83254195-83260534   | 4.2156   | 5.6067   | 0.4114  | 0.104186 |
| <i>Rps4x</i>         | chrX:102184904-102189394  | 186.9000 | 142.4046 | -0.3923 | 0.153884 |
| <i>Snora64</i>       | chr17:24720771-24720905   | 27.5365  | 15.8522  | -0.7967 | 0.112556 |
| <i>Cecr5</i>         | chr6:120509493-120531319  | 38.9551  | 33.5546  | -0.2153 | 0.052786 |
| <i>Ms4a4c</i>        | chr19:11404769-11427246   | 85.7534  | 105.6564 | 0.3011  | 0.178834 |
| <i>Gm10704</i>       | chr3:88576244-88577208    | 7.3996   | 10.3014  | 0.4773  | 0.106920 |
| <i>Hexb</i>          | chr13:97176331-97198357   | 49.6361  | 41.8846  | -0.2450 | 0.055537 |
| <i>Ijih1</i>         | chr2:62595797-62646255    | 6.9136   | 8.8847   | 0.3619  | 0.181541 |
| <i>Ppp1r12c</i>      | chr7:4481519-4501680      | 31.9994  | 28.4761  | -0.1683 | 0.012430 |
| <i>Chsy1</i>         | chr7:66109514-66173789    | 30.9444  | 38.2237  | 0.3048  | 0.169380 |
| <i>Nedd4</i>         | chr9:72662556-72749842    | 19.3133  | 16.3289  | -0.2422 | 0.042746 |
| <i>Fam19a3</i>       | chr3:104767405-104781840  | 0.2625   | 0.5214   | 0.9902  | 0.189839 |
| <i>Gm11632</i>       | chr11:98084456-98085424   | 14.2866  | 10.8872  | -0.3920 | 0.036960 |
| <i>Mfng</i>          | chr15:78755881-78773475   | 36.2411  | 31.4253  | -0.2057 | 0.024286 |
| <i>Rpsa</i>          | chr9:120127765-120132369  | 22.0758  | 17.5019  | -0.3350 | 0.079840 |
| <i>Cmpk2</i>         | chr12:26469203-26479835   | 8.5107   | 11.2892  | 0.4076  | 0.172887 |
| <i>B3gnt4</i>        | chr5:123510459-123511882  | 2.7252   | 1.7232   | -0.6613 | 0.062687 |
| <i>Gimap6</i>        | chr6:48701581-48708225    | 331.6268 | 374.4744 | 0.1753  | 0.081448 |
| <i>Zfp82</i>         | chr7:30054488-30072900    | 4.6834   | 3.9829   | -0.2337 | 0.002474 |
| <i>Cacna1a</i>       | chr8:84388439-84640246    | 0.3865   | 0.5500   | 0.5089  | 0.080111 |
| <i>Taf1d</i>         | chr9:15306213-15312104    | 77.1608  | 89.2671  | 0.2103  | 0.071699 |
| <i>Chmp7</i>         | chr14:69716978-69732570   | 20.2050  | 17.5434  | -0.2038 | 0.003564 |
| <i>Gm17552</i>       | chr19:4169565-4174284     | 4.8500   | 5.7827   | 0.2537  | 0.077781 |
| <i>Sp100</i>         | chr1:85649987-85709998    | 61.4762  | 68.4332  | 0.1547  | 0.100307 |
| <i>Ppic</i>          | chr18:53406340-53418007   | 16.1729  | 20.4844  | 0.3409  | 0.081741 |
| <i>Orm3</i>          | chr4:63356161-63359511    | 1.1613   | 2.1125   | 0.8631  | 0.053297 |
| <i>Pfas</i>          | chr11:68985696-69008460   | 8.4751   | 7.3436   | -0.2067 | 0.022464 |
| <i>Gm17083</i>       | chr13:34006965-34008331   | 3.8735   | 5.1299   | 0.4053  | 0.036523 |
| <i>Serinc5</i>       | chr13:92611137-92711944   | 5.3887   | 4.4933   | -0.2622 | 0.026463 |
| <i>Chpf2</i>         | chr5:24586740-24594395    | 16.7194  | 14.3466  | -0.2208 | 0.048410 |
| <i>Zbtb49</i>        | chr5:38189734-38220457    | 2.7557   | 2.2644   | -0.2833 | 0.029110 |
| <i>Fam175a</i>       | chr5:100805191-100820965  | 9.8605   | 11.3092  | 0.1978  | 0.034697 |
| <i>Pop5</i>          | chr5:115235835-115245351  | 17.7925  | 14.4044  | -0.3048 | 0.056505 |
| <i>Sema4f</i>        | chr6:82911884-82939769    | 5.4417   | 4.4832   | -0.2795 | 0.051886 |
| <i>Sqle</i>          | chr15:59315076-59331192   | 4.5124   | 3.3875   | -0.4137 | 0.109032 |
| <i>Hspbap1</i>       | chr16:35770385-35828446   | 3.5897   | 2.9223   | -0.2967 | 0.013225 |
| <i>Zfyve27</i>       | chr19:42163950-42194590   | 9.4703   | 8.2957   | -0.1911 | 0.019145 |
| <i>Hif1an</i>        | chr19:44562849-44576274   | 10.8877  | 9.5720   | -0.1858 | 0.007091 |
| <i>Gm26224</i>       | chr1:161035393-161035473  | 154.3210 | 218.7766 | 0.5035  | 0.174627 |
| <i>Ptpn2</i>         | chr18:67665510-67724595   | 30.9461  | 34.8549  | 0.1716  | 0.061693 |
| <i>Cdnf</i>          | chr2:3513029-3526376      | 0.8634   | 1.2655   | 0.5516  | 0.034686 |
| <i>Slc25a25</i>      | chr2:32414486-32451445    | 7.0103   | 5.9539   | -0.2356 | 0.008238 |



|                      |                           |          |           |         |          |
|----------------------|---------------------------|----------|-----------|---------|----------|
| <i>Xrn2</i>          | chr2:147012995-147078000  | 173.3013 | 189.4962  | 0.1289  | 0.027511 |
| <i>Eif2a</i>         | chr3:58525820-58557501    | 15.6320  | 17.7864   | 0.1863  | 0.060918 |
| <i>Rpa2</i>          | chr4:132768331-132778752  | 16.5226  | 18.5034   | 0.1633  | 0.030411 |
| <i>9130020K20Rik</i> | chr4:136347285-136350334  | 4.4763   | 3.5046    | -0.3531 | 0.043981 |
| <i>Slc25a33</i>      | chr4:149744035-149774277  | 3.2821   | 2.3756    | -0.4663 | 0.038249 |
| <i>Trbv12-2</i>      | chr6:41118863-41119364    | 89.8809  | 68.8148   | -0.3853 | 0.112699 |
| <i>Cdkn2aipnl</i>    | chr11:51967660-51977334   | 50.0660  | 58.7176   | 0.2300  | 0.100835 |
| <i>Slc36a1</i>       | chr11:55204349-55236330   | 4.5850   | 3.6761    | -0.3187 | 0.057795 |
| <i>Myo18a</i>        | chr11:77763245-77865980   | 4.3299   | 3.6884    | -0.2313 | 0.027182 |
| <i>Timm9</i>         | chr12:71123172-71136675   | 19.3262  | 15.6975   | -0.3000 | 0.027375 |
| <i>Rnf10</i>         | chr5:115241411-115272898  | 16.0833  | 13.4878   | -0.2539 | 0.059132 |
| <i>Ddx28</i>         | chr8:106009615-106011486  | 8.4434   | 10.1178   | 0.2610  | 0.058789 |
| <i>Ywhaz</i>         | chr15:36770769-36794547   | 30.7883  | 35.5629   | 0.2080  | 0.096025 |
| <i>Zfp740</i>        | chr15:102203647-102215606 | 43.8163  | 39.1398   | -0.1628 | 0.003292 |
| <i>Ppig</i>          | chr2:69722544-69754012    | 9.8345   | 11.1697   | 0.1837  | 0.060496 |
| <i>Tpm3</i>          | chr3:90072648-90100902    | 44.6907  | 51.0584   | 0.1922  | 0.100875 |
| <i>Pdcd1</i>         | chr1:94038306-94052553    | 2.6327   | 4.2389    | 0.6871  | 0.171090 |
| <i>Abhd8</i>         | chr8:71456699-71463657    | 46.3599  | 39.0506   | -0.2475 | 0.046686 |
| <i>Ece2</i>          | chr16:20611592-20646485   | 1.6053   | 1.2377    | -0.3752 | 0.033267 |
| <i>Snord2</i>        | chr16:23108952-23109021   | 98.2057  | 126.4130  | 0.3643  | 0.038848 |
| <i>Ms4a6c</i>        | chr19:11469367-11482197   | 52.4690  | 44.2761   | -0.2449 | 0.059940 |
| <i>Tardbp</i>        | chr4:148612381-148627019  | 49.0426  | 43.6862   | -0.1669 | 0.010558 |
| <i>Gm12279</i>       | chr11:62550046-62551041   | 3.4801   | 1.6793    | -1.0513 | 0.002743 |
| <i>C330007P06Rik</i> | chrX:36823736-36874111    | 5.2955   | 6.1425    | 0.2140  | 0.059305 |
| <i>C330027C09Rik</i> | chr16:48994184-49019709   | 2.1361   | 2.6917    | 0.3335  | 0.129909 |
| <i>Fxn</i>           | chr19:24261452-24280605   | 3.6450   | 4.6156    | 0.3406  | 0.051997 |
| <i>Fbxo5</i>         | chr10:5799159-5805600     | 9.0757   | 10.9737   | 0.2740  | 0.086448 |
| <i>Zmynd10</i>       | chr9:107547309-107551319  | 1.5992   | 1.0144    | -0.6568 | 0.030506 |
| <i>Rgs16</i>         | chr1:153740348-153745468  | 1.2515   | 1.9768    | 0.6595  | 0.167721 |
| <i>Arhgap15os</i>    | chr2:44059237-44065324    | 7.6144   | 5.9893    | -0.3464 | 0.035957 |
| <i>Rnf114</i>        | chr2:167492644-167516173  | 60.7459  | 67.4678   | 0.1514  | 0.064749 |
| <i>Tuba1b</i>        | chr15:98931424-98934565   | 5.3319   | 3.9538    | -0.4314 | 0.074109 |
| <i>Plcb3</i>         | chr19:6953713-6969759     | 2.0783   | 2.6344    | 0.3421  | 0.050497 |
| <i>Tnfrsf1a</i>      | chr6:125349361-125362484  | 8.8970   | 7.4816    | -0.2500 | 0.004721 |
| <i>Gemin8</i>        | chrX:166170453-166190512  | 1.0508   | 1.4750    | 0.4892  | 0.006659 |
| <i>Ijft1</i>         | chr19:34640870-34650009   | 21.1332  | 36.3575   | 0.7827  | 0.077362 |
| <i>Cntln</i>         | chr4:84884308-85131921    | 0.4539   | 0.6588    | 0.5373  | 0.082134 |
| <i>Arhgef12</i>      | chr9:42963841-43105718    | 3.8981   | 3.2878    | -0.2456 | 0.027829 |
| <i>D630008O14Rik</i> | chr1:106541942-106575045  | 26.5412  | 22.4107   | -0.2440 | 0.056298 |
| <i>Psmc11</i>        | chr11:80428614-80473248   | 6.9417   | 7.8628    | 0.1798  | 0.041605 |
| <i>mt-Nd1</i>        | chrM:2750-3707            | 830.5343 | 1046.8263 | 0.3339  | 0.204002 |
| <i>Hist1h2af</i>     | chr13:23533905-23534304   | 5.7448   | 9.0575    | 0.6569  | 0.068498 |
| <i>Gm16234</i>       | chr10:14664219-14668318   | 13.7713  | 16.8215   | 0.2886  | 0.052432 |
| <i>Tbc1d15</i>       | chr10:115197876-115251493 | 7.9139   | 9.6391    | 0.2845  | 0.172904 |
| <i>Irf7</i>          | chr7:141262705-141266481  | 35.9717  | 45.6205   | 0.3428  | 0.192260 |
| <i>Taf11</i>         | chr17:27901121-27909242   | 7.6975   | 6.0834    | -0.3395 | 0.048919 |
| <i>Ivd</i>           | chr2:118861953-118882909  | 10.5144  | 9.0896    | -0.2101 | 0.019959 |
| <i>Unc13d</i>        | chr11:116062094-116077961 | 43.3378  | 38.9555   | -0.1538 | 0.009179 |
| <i>Hist1h4d</i>      | chr13:23581597-23581990   | 226.9976 | 347.8537  | 0.6158  | 0.070128 |
| <i>Ctbp1</i>         | chr5:33247723-33275004    | 72.9113  | 64.4378   | -0.1782 | 0.023410 |
| <i>Gm22270</i>       | chr5:107905176-107905308  | 42.7808  | 30.3259   | -0.4964 | 0.044151 |
| <i>Bola3</i>         | chr6:83349146-83360136    | 5.1488   | 6.3726    | 0.3076  | 0.132883 |
| <i>Cmas</i>          | chr6:142756685-142775714  | 27.3356  | 30.0792   | 0.1380  | 0.010068 |
| <i>Ubfd1</i>         | chr7:122067174-122082194  | 8.5766   | 7.3771    | -0.2174 | 0.029164 |
| <i>Cog4</i>          | chr8:110846599-110882227  | 16.4211  | 14.0795   | -0.2219 | 0.046647 |
| <i>Zfp276</i>        | chr8:123254194-123269745  | 9.9692   | 8.6324    | -0.2077 | 0.016095 |
| <i>Rad1</i>          | chr15:10486017-10499063   | 4.7905   | 3.9956    | -0.2618 | 0.037749 |
| <i>Nckap5los</i>     | chr15:99427700-99435313   | 3.0205   | 2.1002    | -0.5242 | 0.046883 |
| <i>Gm8909</i>        | chr17:36164442-36168537   | 1.2738   | 1.8805    | 0.5620  | 0.014511 |
| <i>Gm23246</i>       | chr19:8725593-8725660     | 25.8719  | 39.5550   | 0.6125  | 0.033961 |
| <i>Gm8369</i>        | chr19:11492037-11512577   | 13.9384  | 17.5428   | 0.3318  | 0.148082 |
| <i>2010002M12Rik</i> | chr19:34617048-34640743   | 1.1154   | 1.5414    | 0.4667  | 0.061263 |
| <i>Phlda3</i>        | chr1:135766118-135769136  | 0.7786   | 0.3866    | -1.0099 | 0.041455 |
| <i>Fasl</i>          | chr1:161780690-161788495  | 2.3033   | 5.2553    | 1.1900  | 0.083930 |
| <i>Malt1</i>         | chr18:65430962-65478823   | 54.6892  | 60.2337   | 0.1393  | 0.043791 |
| <i>Bmyc</i>          | chr2:25706878-25707717    | 1.0365   | 2.1737    | 1.0684  | 0.100902 |
| <i>Pdrg1</i>         | chr2:153008889-153015427  | 23.8924  | 20.2116   | -0.2414 | 0.036868 |
| <i>Zswim1</i>        | chr2:164822685-164826871  | 4.2774   | 5.1670    | 0.2726  | 0.029303 |
| <i>Spg20</i>         | chr3:55112107-55137322    | 6.9731   | 8.0298    | 0.2036  | 0.043285 |
| <i>Smpd13b</i>       | chr4:132732965-132757252  | 2.5930   | 4.9973    | 0.9465  | 0.105411 |
| <i>Gm9625</i>        | chr13:67810245-67811200   | 28.7486  | 20.7701   | -0.4690 | 0.178015 |

|                      |                           |          |          |         |          |
|----------------------|---------------------------|----------|----------|---------|----------|
| <i>Gab3</i>          | chrX:74966842-75085458    | 8.1414   | 9.7146   | 0.2549  | 0.121430 |
| <i>Wdr90</i>         | chr17:25844770-25861501   | 3.7193   | 3.1356   | -0.2463 | 0.025778 |
| <i>Gm9581</i>        | chr16:59558012-59600886   | 0.2176   | 0.4220   | 0.9555  | 0.041518 |
| <i>Hs1bp3</i>        | chr12:8313432-8343824     | 1.6321   | 2.1303   | 0.3843  | 0.030679 |
| <i>Zfp672</i>        | chr11:58315113-58323346   | 16.0587  | 13.9874  | -0.1992 | 0.008316 |
| <i>E330009J07Rik</i> | chr6:40401374-40436135    | 12.1991  | 10.4206  | -0.2273 | 0.038625 |
| <i>Ldlr</i>          | chr9:21723575-21749916    | 7.8933   | 6.2882   | -0.3280 | 0.068367 |
| <i>Samm50</i>        | chr15:84192232-84214303   | 49.4581  | 42.3406  | -0.2242 | 0.033344 |
| <i>Gm15367</i>       | chrX:75010589-75011605    | 0.9046   | 1.6220   | 0.8424  | 0.037998 |
| <i>Pcgf5</i>         | chr19:36379066-36456192   | 18.8808  | 15.8232  | -0.2549 | 0.028787 |
| <i>Srsf12</i>        | chr4:33208990-33233340    | 2.7287   | 2.0755   | -0.3948 | 0.032272 |
| <i>4930507D05Rik</i> | chr10:62449488-62451322   | 1.4035   | 0.8872   | -0.6618 | 0.015739 |
| <i>Snord91a</i>      | chr11:74905423-74905516   | 15.8910  | 7.6926   | -1.0467 | 0.123494 |
| <i>Trim27</i>        | chr13:21179444-21194724   | 26.3985  | 23.5871  | -0.1625 | 0.005001 |
| <i>Trav14n-3</i>     | chr14:53370295-53370575   | 5.9403   | 8.9976   | 0.5990  | 0.021758 |
| <i>Setdb2</i>        | chr14:59402008-59440884   | 17.4496  | 19.6182  | 0.1690  | 0.077398 |
| <i>Shisa5</i>        | chr9:109038564-109057724  | 653.8773 | 750.1194 | 0.1981  | 0.121230 |
| <i>Srp3</i>          | chrX:73774404-73778925    | 1.6091   | 2.1195   | 0.3975  | 0.016904 |
| <i>Camsap3</i>       | chr8:3587449-3609074      | 0.4630   | 0.2820   | -0.7152 | 0.002267 |
| <i>Apbb1</i>         | chr7:105558485-105574402  | 0.9764   | 1.5147   | 0.6335  | 0.121131 |
| <i>Tor1b</i>         | chr2:30952958-30959015    | 23.1423  | 19.9275  | -0.2158 | 0.050903 |
| <i>Atp5e</i>         | chr2:174461071-174464105  | 39.4575  | 30.4420  | -0.3742 | 0.141512 |
| <i>NA</i>            | chr19:8770995-8772475     | 22.6943  | 17.6610  | -0.3618 | 0.063926 |
| <i>Kctd15</i>        | chr7:34639013-34655509    | 0.3985   | 0.1723   | -1.2095 | 0.105896 |
| <i>Cxcr5</i>         | chr9:44511787-44556391    | 8.7685   | 11.8260  | 0.4316  | 0.132281 |
| <i>Gm10392</i>       | chr11:77516659-77519198   | 7.4438   | 5.8391   | -0.3503 | 0.044977 |
| <i>4933440N22Rik</i> | chr6:117907109-117907760  | 24.5210  | 19.5472  | -0.3271 | 0.040722 |
| <i>Samhd1</i>        | chr2:157097532-157135265  | 42.6731  | 48.7677  | 0.1926  | 0.161206 |
| <i>Tra2a</i>         | chr6:49243920-49264052    | 33.6226  | 28.6437  | -0.2312 | 0.041200 |
| <i>Fam49b</i>        | chr15:63929096-64060448   | 56.6603  | 62.4740  | 0.1409  | 0.046928 |
| <i>Phospho1</i>      | chr11:95824498-95832140   | 2.9613   | 2.2025   | -0.4271 | 0.010634 |
| <i>Gpr132</i>        | chr12:112850875-112860916 | 42.9702  | 37.2315  | -0.2068 | 0.050853 |
| <i>Ccni</i>          | chr5:93181932-93206495    | 32.8627  | 37.5270  | 0.1915  | 0.077139 |
| <i>Fam109b</i>       | chr15:82338941-82345743   | 0.4171   | 0.6531   | 0.6467  | 0.022744 |
| <i>Stat2</i>         | chr10:128270575-128292849 | 13.1596  | 14.8220  | 0.1716  | 0.083676 |
| <i>Smim14</i>        | chr5:65446843-65537184    | 10.1043  | 11.2961  | 0.1608  | 0.058986 |
| <i>Slc2a4rg-ps</i>   | chr2:181384249-181387586  | 42.3914  | 35.7414  | -0.2462 | 0.081030 |
| <i>Slc31a1</i>       | chr4:62360726-62391769    | 3.0403   | 3.6505   | 0.2639  | 0.049280 |
| <i>Krba1</i>         | chr6:48395585-48419855    | 4.6908   | 4.0438   | -0.2141 | 0.016541 |
| <i>Man2a2</i>        | chr7:80349097-80371375    | 29.5813  | 26.6048  | -0.1530 | 0.009704 |
| <i>Cep55</i>         | chr19:38055024-38074425   | 1.9623   | 2.8667   | 0.5468  | 0.187441 |
| <i>Tmem19</i>        | chr10:115340738-115362262 | 12.5046  | 10.7313  | -0.2206 | 0.009762 |
| <i>Hid1</i>          | chr11:115347706-115367756 | 17.2381  | 14.7072  | -0.2291 | 0.041530 |
| <i>Gpr68</i>         | chr12:100876681-100908198 | 49.7581  | 43.6505  | -0.1889 | 0.026318 |
| <i>Rpsud2</i>        | chr2:119034789-119039769  | 4.1966   | 5.1759   | 0.3026  | 0.071372 |
| <i>Errfi1</i>        | chr4:150853918-150868892  | 3.8056   | 4.6927   | 0.3023  | 0.096464 |
| <i>Mbd3</i>          | chr10:80392538-80399550   | 19.6323  | 16.8498  | -0.2205 | 0.014358 |
| <i>Gm11724</i>       | chr11:117789896-117791313 | 20.1882  | 15.3433  | -0.3959 | 0.078162 |
| <i>Itgb1bp2</i>      | chrX:101449087-101453541  | 1.4499   | 2.1520   | 0.5697  | 0.099387 |
| <i>1700025G04Rik</i> | chr1:151884523-152090320  | 3.0859   | 3.9142   | 0.3430  | 0.168849 |
| <i>Gm17251</i>       | chr17:33759991-33761870   | 8.1889   | 10.0806  | 0.2998  | 0.007153 |
| <i>4930404I05Rik</i> | chr16:91011248-91016743   | 9.0268   | 7.2592   | -0.3144 | 0.084054 |
| <i>Chd3os</i>        | chr11:69340460-69342641   | 1.4229   | 1.9872   | 0.4819  | 0.046673 |
| <i>Hopx</i>          | chr5:77086442-77115161    | 17.2604  | 19.9623  | 0.2098  | 0.077752 |
| <i>Irf8</i>          | chr8:120736357-120756694  | 2.0070   | 2.5613   | 0.3519  | 0.136564 |
| <i>Slc35g1</i>       | chr19:38395979-38405607   | 24.2469  | 20.7980  | -0.2214 | 0.038301 |
| <i>Ctdsp1</i>        | chr1:74391508-74397285    | 12.9616  | 11.1917  | -0.2118 | 0.017990 |
| <i>Coq4</i>          | chr2:29787492-29797935    | 1.2424   | 1.6614   | 0.4192  | 0.065321 |
| <i>Ptpn22</i>        | chr3:103859794-103912247  | 88.7410  | 97.6922  | 0.1386  | 0.090270 |
| <i>Whrn</i>          | chr4:63414909-63495991    | 0.3370   | 0.5524   | 0.7130  | 0.128613 |
| <i>Saysd1</i>        | chr14:20075645-20083172   | 8.0522   | 6.5374   | -0.3007 | 0.026380 |
| <i>Setbp1</i>        | chr18:78750379-79109391   | 1.0002   | 1.3770   | 0.4613  | 0.170066 |
| <i>2310031A07Rik</i> | chr11:46440361-46447248   | 8.0513   | 10.0287  | 0.3168  | 0.053621 |
| <i>BC068281</i>      | chr12:4843302-4856925     | 3.8297   | 3.0196   | -0.3429 | 0.037934 |
| <i>2610020H08Rik</i> | chr7:119794005-119848943  | 8.7238   | 7.4360   | -0.2304 | 0.037341 |
| <i>Gm21811</i>       | chr8:20136454-20150494    | 1.0707   | 1.4368   | 0.4243  | 0.027407 |
| <i>Cdhr4</i>         | chr9:107983286-107999684  | 1.0975   | 0.6803   | -0.6900 | 0.128719 |
| <i>Zfp300</i>        | chrX:21079173-21089527    | 1.7901   | 2.3013   | 0.3624  | 0.138201 |
| <i>Zbtb33</i>        | chrX:38189792-38197046    | 5.5943   | 6.8350   | 0.2890  | 0.155376 |
| <i>Knstrn</i>        | chr2:118814002-118853957  | 2.9059   | 3.4428   | 0.2446  | 0.065883 |
| <i>Arsb</i>          | chr13:93771678-93943016   | 2.7289   | 3.8156   | 0.4836  | 0.190730 |

|               |                           |           |           |         |          |
|---------------|---------------------------|-----------|-----------|---------|----------|
| Zc3hc1        | chr6:30366379-30391028    | 6.3950    | 5.3742    | -0.2509 | 0.031660 |
| Aatf          | chr11:84422854-84513522   | 26.4024   | 29.3754   | 0.1539  | 0.040723 |
| Gm16283       | chr18:49755793-49757189   | 3.1150    | 4.8133    | 0.6278  | 0.027876 |
| 1110046J04Rik | chr13:33935566-33960181   | 0.1837    | 0.3804    | 1.0504  | 0.147035 |
| Gsap          | chr5:21186266-21291701    | 8.8697    | 10.4218   | 0.2326  | 0.137241 |
| Sun1          | chr5:139200636-139249840  | 16.1369   | 14.0690   | -0.1978 | 0.051178 |
| Polr2i        | chr7:30231947-30233390    | 11.9634   | 15.2058   | 0.3460  | 0.134807 |
| Zfp473        | chr7:44731480-44751050    | 0.1780    | 0.2948    | 0.7278  | 0.134543 |
| 9330175E14Rik | chr8:94422898-94435105    | 9.9349    | 8.3579    | -0.2494 | 0.061934 |
| Brcc3         | chrX:75416627-75454001    | 6.8554    | 7.7077    | 0.1690  | 0.050254 |
| A630033H20Rik | chrX:107148926-107173661  | 9.0319    | 10.8525   | 0.2649  | 0.158010 |
| Ap1s2         | chrX:163909016-163933666  | 5.2954    | 6.3703    | 0.2666  | 0.108519 |
| Hmgn1         | chr16:96120617-96127729   | 15.5795   | 12.6505   | -0.3005 | 0.088082 |
| Mfsd7b        | chr1:191005831-191026190  | 14.1149   | 12.2715   | -0.2019 | 0.012920 |
| Snord17       | chr2:144265978-144266216  | 1246.7172 | 1420.2252 | 0.1880  | 0.137179 |
| Dcaf12        | chr4:41291299-41314889    | 22.8602   | 20.0780   | -0.1872 | 0.026370 |
| Slc35d2       | chr13:64096309-64129330   | 7.8273    | 9.2272    | 0.2374  | 0.075893 |
| Gm24407       | chr5:115490253-115490394  | 312.3330  | 157.0108  | -0.9922 | 0.129686 |
| Rsu1          | chr2:13076966-13271431    | 3.6133    | 4.2872    | 0.2467  | 0.088528 |
| Sgpp1         | chr12:75714247-75735729   | 38.5943   | 42.8355   | 0.1504  | 0.043865 |
| Pradc1        | chr6:85446809-85451970    | 7.4727    | 5.7018    | -0.3902 | 0.048590 |
| Mettl17       | chr14:51884841-51893039   | 17.8173   | 15.6539   | -0.1868 | 0.020486 |
| Lrrc58        | chr16:37868388-37888858   | 12.3373   | 11.0504   | -0.1589 | 0.000787 |
| Limk2         | chr11:3344255-3409189     | 25.1348   | 22.5205   | -0.1584 | 0.013272 |
| Tmem29        | chrX:150397772-150459154  | 1.0859    | 1.3360    | 0.2990  | 0.033064 |
| C730034F03Rik | chr15:89429588-89430868   | 7.7356    | 6.1295    | -0.3358 | 0.008949 |
| Trim12a       | chr7:104299893-104315466  | 41.1478   | 45.2550   | 0.1373  | 0.096296 |
| Ahcy11        | chr3:107663117-107696560  | 13.6865   | 12.0035   | -0.1893 | 0.026863 |
| Psemb6        | chr11:70525366-70527858   | 52.8658   | 61.8327   | 0.2260  | 0.130248 |
| Ak3           | chr19:29020832-29047961   | 34.1436   | 29.9841   | -0.1874 | 0.020304 |
| Srrm1         | chr4:135320483-135353321  | 12.7843   | 14.3665   | 0.1683  | 0.116606 |
| Gnptab        | chr10:88379131-88447329   | 12.0625   | 14.7527   | 0.2905  | 0.224200 |
| Fcho2         | chr13:98723406-98815449   | 5.7366    | 7.3293    | 0.3535  | 0.231165 |
| St7           | chr6:17692932-17943025    | 1.7993    | 2.0886    | 0.2151  | 0.021504 |
| Ezh2          | chr6:47530273-47595341    | 6.1872    | 6.8807    | 0.1533  | 0.009473 |
| Hmgb2         | chr8:57511842-57515999    | 3.4034    | 4.3611    | 0.3577  | 0.129921 |
| NA            | chr17:32403005-32404698   | 54.1472   | 47.6631   | -0.1840 | 0.020513 |
| Kiz           | chr2:146855863-146970097  | 15.0276   | 17.3726   | 0.2092  | 0.064269 |
| B4galt7       | chr13:55599895-55610443   | 25.3476   | 22.1734   | -0.1930 | 0.020188 |
| Mfsd6         | chr1:52656285-52727462    | 7.6721    | 9.2148    | 0.2643  | 0.176885 |
| Akap12        | chr10:4266328-4359468     | 3.3549    | 2.7436    | -0.2902 | 0.042867 |
| Gm20470       | chr10:7743519-7761099     | 46.9638   | 55.2122   | 0.2334  | 0.030011 |
| Gm15200       | chr10:42698035-42698518   | 20.5219   | 26.0433   | 0.3437  | 0.087576 |
| Rpl23a        | chr11:78180931-78183584   | 8.6288    | 10.8608   | 0.3319  | 0.079071 |
| Ly86          | chr13:37345344-37419036   | 0.7385    | 1.7988    | 1.2845  | 0.227445 |
| Irga1         | chr13:114958078-115101964 | 0.1882    | 0.3223    | 0.7762  | 0.096900 |
| Slc2a9        | chr5:38349272-38503143    | 4.3432    | 3.6152    | -0.2647 | 0.023662 |
| Gimap4        | chr6:48684548-48692060    | 771.4342  | 854.0759  | 0.1468  | 0.077212 |
| Cd22          | chr7:30865401-30880342    | 0.8447    | 2.0500    | 1.2791  | 0.122416 |
| Slc25a15      | chr8:22375553-22398621    | 4.3203    | 3.5498    | -0.2834 | 0.007021 |
| Tmem115       | chr9:107533944-107538656  | 18.5186   | 15.6537   | -0.2425 | 0.048606 |
| Eomes         | chr9:118478211-118486132  | 27.7204   | 34.2140   | 0.3036  | 0.167088 |
| Selk          | chr14:29968307-29975074   | 16.1610   | 12.8265   | -0.3334 | 0.054722 |
| Rps10         | chr17:27630421-27636629   | 61.7607   | 47.9115   | -0.3663 | 0.139482 |
| Ydjc          | chr16:17144620-17160701   | 3.3033    | 2.7247    | -0.2778 | 0.026516 |
| Tmem163       | chr1:127486545-127678096  | 0.7016    | 1.0636    | 0.6001  | 0.079729 |
| mt-Tl1        | chrM:2675-2750            | 12.6892   | 21.7549   | 0.7777  | 0.039754 |
| Rnf13         | chr3:57736065-57835233    | 22.5067   | 24.8506   | 0.1429  | 0.015522 |
| Hist2h4       | chr3:96261703-96263311    | 29.0230   | 44.0850   | 0.6031  | 0.081807 |
| Celsr2        | chr3:108390850-108415552  | 0.5433    | 0.4014    | -0.4365 | 0.041539 |
| Nfia          | chr4:97772733-98118874    | 0.3889    | 0.5602    | 0.5264  | 0.125675 |
| NA            | chr2:13557847-13560324    | 0.1847    | 0.4309    | 1.2225  | 0.109517 |
| Nphp4         | chr4:152476705-152563183  | 0.0915    | 0.2082    | 1.1861  | 0.197972 |
| Gm26522       | chr7:88278786-88283529    | 4.4772    | 5.7179    | 0.3529  | 0.102575 |
| Gsto1         | chr19:47854969-47864790   | 5.2417    | 6.8016    | 0.3758  | 0.118459 |
| Nrd1          | chr4:109000654-109061777  | 20.4849   | 18.2097   | -0.1699 | 0.011487 |
| Ppp1r12a      | chr10:108162399-108277575 | 113.9354  | 126.1792  | 0.1473  | 0.088881 |
| Trbc2         | chr6:41546729-41548181    | 718.7331  | 843.8414  | 0.2315  | 0.160123 |
| Oasl2         | chr5:114896935-114912234  | 2.9516    | 5.5605    | 0.9137  | 0.070945 |
| Dcp1a         | chr14:30479564-30527056   | 13.9493   | 12.4237   | -0.1671 | 0.005034 |
| BC002059      | chr17:16972909-16973770   | 25.5752   | 29.4750   | 0.2047  | 0.033826 |

|                      |                           |          |          |         |          |
|----------------------|---------------------------|----------|----------|---------|----------|
| <i>Med7</i>          | chr11:46436924-46442721   | 4.4892   | 5.6109   | 0.3218  | 0.158515 |
| <i>Zfp808</i>        | chr13:62129915-62173419   | 1.2769   | 1.7570   | 0.4604  | 0.079977 |
| <i>Ak6</i>           | chr13:100651342-100666413 | 19.8997  | 15.9826  | -0.3162 | 0.073288 |
| <i>Plcg1</i>         | chr2:160731299-160775760  | 62.2917  | 55.6047  | -0.1638 | 0.029777 |
| <i>Trappc3</i>       | chr4:126262324-126275883  | 21.3635  | 18.0055  | -0.2467 | 0.033702 |
| <i>Pnrc2</i>         | chr4:135870917-135873850  | 100.4509 | 113.0300 | 0.1702  | 0.078908 |
| <i>Adat3</i>         | chr10:80602879-80615783   | 9.9304   | 8.3775   | -0.2453 | 0.074529 |
| <i>Tsfn</i>          | chr10:127011571-127030840 | 6.6401   | 5.5379   | -0.2619 | 0.021312 |
| <i>Rpl41</i>         | chr10:128548113-128549305 | 148.1654 | 227.0676 | 0.6159  | 0.084027 |
| <i>Snora5c</i>       | chr11:6620318-6620454     | 15.7497  | 9.3796   | -0.7477 | 0.039776 |
| <i>Pttg1</i>         | chr11:43420249-43426251   | 15.0951  | 17.1105  | 0.1808  | 0.042412 |
| <i>Slu7</i>          | chr11:43433743-43447981   | 36.5475  | 41.1786  | 0.1721  | 0.093825 |
| <i>Gm12256</i>       | chr11:58889709-58891548   | 20.5357  | 26.4773  | 0.3666  | 0.133782 |
| <i>1700001P01Rik</i> | chr11:97771480-97775918   | 1.6953   | 0.7385   | -1.1988 | 0.128483 |
| <i>Zfp410</i>        | chr12:84316858-84343830   | 19.1748  | 16.2490  | -0.2389 | 0.056874 |
| <i>Gm17139</i>       | chr12:84918147-84919238   | 34.5807  | 28.3823  | -0.2850 | 0.052632 |
| <i>Clptm1l</i>       | chr13:73604001-73620639   | 59.0930  | 51.9416  | -0.1861 | 0.031603 |
| <i>Art3</i>          | chr5:92331826-92414628    | 0.1866   | 0.3267   | 0.8084  | 0.008493 |
| <i>Hsd17b11</i>      | chr5:103989761-104021919  | 5.6927   | 7.1271   | 0.3242  | 0.170844 |
| <i>Gtf2ird1</i>      | chr5:134357668-134456716  | 2.4933   | 1.9043   | -0.3888 | 0.057891 |
| <i>lqce</i>          | chr5:140661826-140702378  | 5.0745   | 4.4743   | -0.1816 | 0.010466 |
| <i>Atp5j2</i>        | chr5:145183697-145192062  | 25.8756  | 20.0211  | -0.3701 | 0.109572 |
| <i>Gm26625</i>       | chr6:47546665-47551704    | 1.3678   | 1.8736   | 0.4539  | 0.084460 |
| <i>Paip2b</i>        | chr6:83805400-83831741    | 10.1344  | 8.8072   | -0.2025 | 0.021197 |
| <i>Gm17104</i>       | chr7:30564736-30565356    | 46.6036  | 55.9771  | 0.2644  | 0.079657 |
| <i>Cebpg</i>         | chr7:35046421-35056503    | 16.0205  | 13.9797  | -0.1966 | 0.027223 |
| <i>Cd97</i>          | chr8:83723250-83741326    | 175.0702 | 201.6318 | 0.2038  | 0.155124 |
| <i>A230103J11Rik</i> | chr8:85053159-85060460    | 8.3158   | 6.9731   | -0.2541 | 0.004024 |
| <i>Cog2</i>          | chr8:124520766-124520008  | 13.6366  | 12.0047  | -0.1839 | 0.010245 |
| <i>Kdm4d</i>         | chr9:14462547-14500482    | 0.4114   | 0.7226   | 0.8127  | 0.143615 |
| <i>Zfp609</i>        | chr9:65692390-65827564    | 1.8402   | 2.2364   | 0.2813  | 0.091431 |
| <i>Sept6</i>         | chrX:36911325-36991794    | 43.3531  | 48.9860  | 0.1762  | 0.110273 |
| <i>Cpsf1</i>         | chr15:76595808-76607591   | 27.1812  | 23.8578  | -0.1882 | 0.054068 |
| <i>Dph3</i>          | chr14:32080565-32085692   | 9.3181   | 10.5730  | 0.1823  | 0.045796 |
| <i>Rabgga</i>        | chr14:55715872-55722257   | 23.8803  | 20.0104  | -0.2551 | 0.105467 |
| <i>Gm15764</i>       | chr16:18416681-18421997   | 2.0177   | 3.2770   | 0.6996  | 0.119069 |
| <i>Slc15a2</i>       | chr16:36750177-36784962   | 14.4404  | 9.6774   | -0.5774 | 0.098856 |
| <i>Cep97</i>         | chr16:55899887-55934855   | 22.0719  | 19.7698  | -0.1589 | 0.011394 |
| <i>Minpp1</i>        | chr19:32485768-32515370   | 13.9586  | 11.9036  | -0.2298 | 0.031595 |
| <i>Psd</i>           | chr19:46312086-46327156   | 1.3555   | 0.9793   | -0.4690 | 0.048898 |
| <i>Zdhhc6</i>        | chr19:55298300-55316032   | 18.3302  | 20.3503  | 0.1508  | 0.026707 |
| <i>Klf7</i>          | chr1:64029446-64122282    | 8.2189   | 9.4188   | 0.1966  | 0.145952 |
| <i>Dgkd</i>          | chr1:87853286-87944489    | 59.3408  | 53.6443  | -0.1456 | 0.011663 |
| <i>Ints7</i>         | chr1:191575762-191622672  | 23.5604  | 20.8586  | -0.1757 | 0.026945 |
| <i>Cr2</i>           | chr1:195136810-195176715  | 0.7052   | 0.9322   | 0.4027  | 0.064510 |
| <i>Rbms1</i>         | chr2:60750192-60963192    | 18.0884  | 20.2556  | 0.1633  | 0.089592 |
| <i>Scrn3</i>         | chr2:73312600-73337818    | 1.2161   | 1.5940   | 0.3904  | 0.108729 |
| <i>Ptprj</i>         | chr2:90429753-90580647    | 0.5424   | 0.8338   | 0.6205  | 0.278872 |
| <i>Stard7</i>        | chr2:127270217-127298932  | 22.8458  | 19.5359  | -0.2258 | 0.072103 |
| <i>lft80</i>         | chr3:68892498-69004570    | 27.6786  | 30.2000  | 0.1258  | 0.055099 |
| <i>Dennd2c</i>       | chr3:103102603-103169769  | 0.8703   | 0.6001   | -0.5364 | 0.100284 |
| <i>Kcna3</i>         | chr3:107036161-107038129  | 37.0074  | 32.5377  | -0.1857 | 0.019119 |
| <i>Mettl14</i>       | chr3:123364644-123385990  | 7.2913   | 8.2179   | 0.1726  | 0.030389 |
| <i>Pdp1</i>          | chr4:11958183-11966452    | 6.5947   | 7.6263   | 0.2097  | 0.064512 |
| <i>Rcan3</i>         | chr4:135412307-135433853  | 9.2235   | 7.7606   | -0.2491 | 0.061521 |
| <i>Rpl11</i>         | chr4:136028264-136053428  | 10.4014  | 8.3037   | -0.3249 | 0.085273 |
| <i>Klrc3</i>         | chr6:129639063-129643337  | 0.6661   | 1.2938   | 0.9578  | 0.002562 |
| <i>Bcl2a1b</i>       | chr9:89199208-89207827    | 4.1741   | 5.6059   | 0.4255  | 0.024732 |
| <i>4831440E17Rik</i> | chr5:25499066-25501541    | 2.8162   | 3.8157   | 0.4382  | 0.002241 |
| <i>Traj19</i>        | chr14:54200385-54200446   | 109.6898 | 81.1006  | -0.4356 | 0.047878 |
| <i>As3mt</i>         | chr19:46707442-46741095   | 10.9734  | 12.9856  | 0.2429  | 0.090386 |
| <i>Tab2</i>          | chr10:7905652-7956230     | 19.2646  | 21.4720  | 0.1565  | 0.095685 |
| <i>Edaradd</i>       | chr13:12471208-12520450   | 0.8101   | 1.0537   | 0.3793  | 0.090525 |
| <i>Slc11a2</i>       | chr15:100387897-100425072 | 14.0682  | 12.1170  | -0.2154 | 0.072466 |
| <i>Reep3</i>         | chr10:67009188-67096988   | 5.5523   | 6.2219   | 0.1643  | 0.024381 |
| <i>Pabpc1</i>        | chr15:36595660-36608973   | 53.5051  | 63.8698  | 0.2555  | 0.233232 |
| <i>Pi4k2a</i>        | chr19:42090434-42122218   | 8.9287   | 7.6203   | -0.2286 | 0.027418 |
| <i>H1f0</i>          | chr15:79028211-79030498   | 1.4263   | 2.0579   | 0.5289  | 0.112842 |
| <i>Atp1a1</i>        | chr3:101576218-101604603  | 150.0382 | 132.0367 | -0.1844 | 0.057245 |
| <i>AA414768</i>      | chrX:12936871-12938128    | 1.0174   | 0.5361   | -0.9243 | 0.035223 |
| <i>Pim1</i>          | chr17:29490811-29495445   | 55.6296  | 69.3554  | 0.3182  | 0.201629 |

|                      |                           |          |          |         |          |
|----------------------|---------------------------|----------|----------|---------|----------|
| <i>Cenpf</i>         | chr1:189640598-189688086  | 1.2833   | 1.7661   | 0.4607  | 0.219099 |
| <i>D730045B01Rik</i> | chr5:151368863-151369172  | 5.6455   | 2.9647   | -0.9292 | 0.089722 |
| <i>Acaa2</i>         | chr18:74779196-74806207   | 53.9924  | 45.3671  | -0.2511 | 0.065123 |
| <i>2700094K13Rik</i> | chr2:84669217-84670770    | 27.5130  | 22.5059  | -0.2898 | 0.074291 |
| <i>Gm26699</i>       | chr6:38551530-38554007    | 11.9017  | 13.9297  | 0.2270  | 0.099644 |
| <i>Ccdc173</i>       | chr2:69758032-69789575    | 1.3937   | 1.9033   | 0.4495  | 0.055288 |
| <i>Gna13</i>         | chr11:109362830-109401369 | 41.6379  | 36.5332  | -0.1887 | 0.058155 |
| <i>Rps26-ps1</i>     | chr8:107439175-107439585  | 12.0252  | 17.6067  | 0.5501  | 0.155121 |
| <i>Ddx10</i>         | chr9:53098453-53248112    | 37.9084  | 41.9722  | 0.1469  | 0.053430 |
| <i>Asph</i>          | chr4:9448068-9669344      | 0.0984   | 0.1481   | 0.5894  | 0.011214 |
| <i>S1pr4</i>         | chr10:81497744-81500132   | 90.9486  | 80.6246  | -0.1738 | 0.051921 |
| <i>Klhdc10</i>       | chr6:30401867-30455179    | 5.5101   | 4.7842   | -0.2038 | 0.037679 |
| <i>4930523C07Rik</i> | chr1:160044383-160078428  | 44.2983  | 48.1046  | 0.1189  | 0.048094 |
| <i>Otud1</i>         | chr2:19658061-19660590    | 9.4911   | 11.4661  | 0.2727  | 0.124569 |
| <i>Fasn</i>          | chr11:120805939-120824178 | 29.3642  | 25.3327  | -0.2131 | 0.105474 |
| <i>Zfp677</i>        | chr17:21383747-21399265   | 10.9236  | 8.9663   | -0.2849 | 0.086425 |
| <i>Snap29</i>        | chr16:17406002-17430826   | 13.8237  | 15.7100  | 0.1845  | 0.077413 |
| <i>Clp1</i>          | chr2:84722103-84727350    | 17.6394  | 15.0743  | -0.2267 | 0.037710 |
| <i>Bai2</i>          | chr4:129984869-130022633  | 2.8470   | 2.2297   | -0.3526 | 0.096107 |
| <i>Dido1</i>         | chr2:180657963-180709999  | 30.0326  | 27.3237  | -0.1364 | 0.005448 |
| <i>Rfng</i>          | chr11:120780745-120784207 | 3.7089   | 2.9410   | -0.3347 | 0.017395 |
| <i>Serpina3g</i>     | chr12:104236244-104241939 | 2.5349   | 5.1619   | 1.0260  | 0.148607 |
| <i>Ncoa7</i>         | chr10:3064583-30803107    | 8.6888   | 9.9232   | 0.1917  | 0.112356 |
| <i>Cisd1</i>         | chr10:71330479-71344954   | 8.1569   | 6.4762   | -0.3329 | 0.008274 |
| <i>Suox</i>          | chr10:128669886-128673918 | 15.9149  | 17.9476  | 0.1734  | 0.047605 |
| <i>Ccl4</i>          | chr11:83662583-83664683   | 4.7401   | 7.0312   | 0.5689  | 0.119095 |
| <i>Gm15561</i>       | chr12:69267770-69273432   | 9.8875   | 12.5004  | 0.3383  | 0.022216 |
| <i>Tgfb3</i>         | chr12:86056743-86079041   | 0.1734   | 0.3366   | 0.9568  | 0.049755 |
| <i>Gm5665</i>        | chr13:62699405-62726689   | 0.5117   | 0.8240   | 0.6872  | 0.031925 |
| <i>Hmgb1</i>         | chr5:149046701-149053513  | 7.6683   | 8.8807   | 0.2118  | 0.132023 |
| <i>Trbj1-1</i>       | chr6:41533863-41533911    | 92.5413  | 65.2709  | -0.5037 | 0.048401 |
| <i>Fam174b</i>       | chr7:73740306-73776919    | 3.1569   | 4.5440   | 0.5255  | 0.171514 |
| <i>Gm7964</i>        | chr7:83755903-83757356    | 7.2403   | 5.2209   | -0.4718 | 0.138110 |
| <i>Pdf</i>           | chr8:107044697-107048614  | 20.7767  | 17.6480  | -0.2355 | 0.032191 |
| <i>Cox5a</i>         | chr9:57521231-57532424    | 65.7124  | 55.0405  | -0.2557 | 0.073037 |
| <i>Ccr5</i>          | chr9:124121542-124147699  | 4.8720   | 8.7000   | 0.8365  | 0.111086 |
| <i>Sntb1</i>         | chr15:55638842-55906949   | 13.8276  | 16.3472  | 0.2415  | 0.150735 |
| <i>Rangap1</i>       | chr15:81704247-81729919   | 43.7553  | 38.8972  | -0.1698 | 0.014594 |
| <i>Cerk</i>          | chr15:86139127-86186141   | 18.9750  | 16.2315  | -0.2253 | 0.077951 |
| <i>Dzip1</i>         | chr14:118875519-118925314 | 19.0377  | 16.7077  | -0.1883 | 0.031123 |
| <i>Glo1</i>          | chr17:30592865-30612659   | 15.5532  | 12.3904  | -0.3280 | 0.131699 |
| <i>Rpl7l1</i>        | chr17:46773906-46782656   | 36.8458  | 31.4333  | -0.2292 | 0.072033 |
| <i>Gm9938</i>        | chr19:23723278-23725034   | 13.1841  | 11.0451  | -0.2554 | 0.032075 |
| <i>Kif14</i>         | chr1:136467957-136531511  | 0.4381   | 0.6966   | 0.6690  | 0.251016 |
| <i>Ncoa6</i>         | chr2:155390655-155473894  | 3.7843   | 4.4222   | 0.2247  | 0.163305 |
| <i>Fdps</i>          | chr3:89093591-89101967    | 14.3164  | 10.5747  | -0.4371 | 0.124047 |
| <i>Fam92a</i>        | chr4:12153408-12172015    | 4.5406   | 5.3357   | 0.2328  | 0.117640 |
| <i>Mad2l2</i>        | chr4:148130383-148145699  | 3.2483   | 3.9828   | 0.2941  | 0.066674 |
| <i>Agrn</i>          | chr4:156165289-156197488  | 1.2619   | 1.5959   | 0.3387  | 0.170905 |
| <i>Frs2</i>          | chr10:117070128-117148474 | 5.2093   | 6.2465   | 0.2620  | 0.202917 |
| <i>Lair1</i>         | chr7:4007072-4063204      | 5.3920   | 6.1966   | 0.2007  | 0.048249 |
| <i>Acp5</i>          | chr9:22126730-22135746    | 140.3896 | 123.6386 | -0.1833 | 0.035118 |
| <i>Mis12</i>         | chr11:71019610-71027371   | 13.4122  | 11.4244  | -0.2314 | 0.036547 |
| <i>Exoc8</i>         | chr8:124890299-124897705  | 13.2280  | 11.7243  | -0.1741 | 0.017970 |
| <i>Acadvl</i>        | chr11:70010182-70015411   | 34.8260  | 30.3083  | -0.2005 | 0.040998 |
| <i>Rnf32</i>         | chr5:29195991-29225524    | 0.7663   | 1.0923   | 0.5113  | 0.025686 |
| <i>Trbv14</i>        | chr6:41135166-41135609    | 56.4107  | 47.8673  | -0.2369 | 0.001434 |
| <i>Gm1123</i>        | chr9:99006964-99035690    | 1.4081   | 0.8597   | -0.7119 | 0.011522 |
| <i>Gm5805</i>        | chr15:81972389-81972845   | 10.3527  | 6.7716   | -0.6124 | 0.142450 |
| <i>Syt3</i>          | chr17:6673457-6738042     | 7.3595   | 6.2336   | -0.2395 | 0.039233 |
| <i>Slc24a5</i>       | chr2:125068123-125088677  | 6.9034   | 8.1307   | 0.2361  | 0.076010 |
| <i>NA</i>            | chr10:63024314-63058813   | 0.6741   | 0.3679   | -0.8738 | 0.065829 |
| <i>Gm21885</i>       | chr11:94284651-94285985   | 8.3020   | 5.5698   | -0.5758 | 0.011106 |
| <i>Traf3</i>         | chr12:111166369-111267153 | 14.3478  | 12.8812  | -0.1556 | 0.003539 |
| <i>Smardc3</i>       | chr5:24590817-24602012    | 9.5382   | 8.1606   | -0.2250 | 0.047006 |
| <i>3110082I17Rik</i> | chr5:139359738-139460502  | 1.7447   | 2.5346   | 0.5388  | 0.129821 |
| <i>Copg1</i>         | chr6:87887813-87913595    | 23.2412  | 21.0956  | -0.1397 | 0.005806 |
| <i>C77080</i>        | chr4:129219577-129261404  | 0.2646   | 0.4143   | 0.6472  | 0.103881 |
| <i>1500002C15Rik</i> | chr4:155732547-155734627  | 11.0332  | 9.1973   | -0.2626 | 0.041998 |
| <i>Mum1</i>          | chr10:80226433-80243903   | 10.8591  | 9.5371   | -0.1873 | 0.043563 |
| <i>Tmem5</i>         | chr10:122078113-122097371 | 3.4212   | 4.0427   | 0.2408  | 0.075076 |

|                      |                           |          |          |         |          |
|----------------------|---------------------------|----------|----------|---------|----------|
| <i>Ccdc50</i>        | chr16:27388868-27452218   | 4.8643   | 5.7529   | 0.2420  | 0.170184 |
| <i>Zcchc11</i>       | chr4:108459425-108559421  | 24.1746  | 27.4244  | 0.1820  | 0.175904 |
| <i>Xrcc5</i>         | chr1:72307420-72394952    | 28.5818  | 31.1823  | 0.1256  | 0.004853 |
| <i>Pde4d</i>         | chr13:108449947-109953461 | 3.8145   | 3.3193   | -0.2006 | 0.029040 |
| <i>6430562O15Rik</i> | chr13:99396923-99412864   | 0.9144   | 0.6909   | -0.4043 | 0.000932 |
| <i>Tppp</i>          | chr13:74009406-74035753   | 1.0151   | 1.3804   | 0.4435  | 0.106276 |
| <i>Mxd4</i>          | chr5:34173886-34187720    | 29.0037  | 24.7697  | -0.2277 | 0.068135 |
| <i>Snord21</i>       | chr5:107904554-107904648  | 110.4802 | 151.9834 | 0.4601  | 0.173408 |
| <i>Lysmd2</i>        | chr9:75625731-75637773    | 6.1134   | 7.6235   | 0.3185  | 0.085432 |
| <i>Rgl2</i>          | chr17:33929542-33937687   | 28.1727  | 25.3061  | -0.1548 | 0.010772 |
| <i>Rnf5</i>          | chr17:34601090-34603690   | 5.8267   | 7.4701   | 0.3584  | 0.111805 |
| <i>Gm16299</i>       | chr19:53819353-53825128   | 0.4010   | 1.7296   | 2.1086  | 0.124552 |
| <i>Scarna6</i>       | chr1:87784555-87784820    | 135.3059 | 104.3292 | -0.3751 | 0.148803 |
| <i>Gtf3c4</i>        | chr2:28822298-28840360    | 9.5941   | 8.3060   | -0.2080 | 0.045756 |
| <i>Gm12868</i>       | chr4:119133748-119138801  | 5.8113   | 3.8524   | -0.5931 | 0.003120 |
| <i>2700062C07Rik</i> | chr18:24470860-24477765   | 9.2239   | 11.1927  | 0.2791  | 0.064021 |
| <i>Isca2</i>         | chr12:84773269-84775089   | 29.4504  | 33.8102  | 0.1992  | 0.061909 |
| <i>Naip2</i>         | chr13:100144062-100202092 | 2.9752   | 3.8548   | 0.3736  | 0.190276 |
| <i>Pde3b</i>         | chr7:114415280-114539251  | 52.3924  | 58.4919  | 0.1589  | 0.109018 |
| <i>Rpl5-ps2</i>      | chr2:154703808-154704699  | 2.9382   | 1.7663   | -0.7342 | 0.114092 |
| <i>Gm12905</i>       | chr4:123905061-123917269  | 3.0097   | 1.8590   | -0.6951 | 0.031156 |
| <i>Fbxw7</i>         | chr3:84815267-84979198    | 14.8500  | 16.2377  | 0.1289  | 0.058435 |
| <i>Rnaset2b</i>      | chr17:6978859-7011299     | 0.9865   | 0.6164   | -0.6783 | 0.079852 |
| <i>AI854703</i>      | chr6:48626763-48633689    | 0.6319   | 0.8788   | 0.4758  | 0.025249 |
| <i>NA</i>            | chr1:138977656-138979240  | 4.8479   | 3.1079   | -0.6414 | 0.016942 |
| <i>Themis2</i>       | chr4:132781842-132796387  | 3.1451   | 4.4550   | 0.5023  | 0.172654 |
| <i>Tank</i>          | chr2:61578584-61654171    | 20.4103  | 22.9912  | 0.1718  | 0.098268 |
| <i>Trbj1-2</i>       | chr6:41534000-41534048    | 177.7213 | 129.6865 | -0.4546 | 0.107193 |
| <i>Pnkp</i>          | chr7:44857138-44862925    | 20.5952  | 17.9508  | -0.1983 | 0.027748 |
| <i>NA</i>            | chr7:127524696-127524965  | 3.6441   | 1.6849   | -1.1129 | 0.032798 |
| <i>Sbf1</i>          | chr15:89288235-89315311   | 58.1312  | 50.5060  | -0.2029 | 0.095015 |
| <i>Rgs2</i>          | chr1:143999337-144004161  | 4.9796   | 5.9958   | 0.2679  | 0.158775 |
| <i>Tet2</i>          | chr3:133463678-133544390  | 12.4476  | 13.7054  | 0.1389  | 0.112978 |
| <i>Ptov1</i>         | chr7:44863067-44869788    | 3.2327   | 2.6546   | -0.2842 | 0.020290 |
| <i>Mbip</i>          | chr12:56328305-56345894   | 15.1833  | 17.2376  | 0.1831  | 0.017535 |
| <i>Mvd</i>           | chr8:122433595-122443422  | 13.8242  | 11.4540  | -0.2713 | 0.058010 |
| <i>9630013D21Rik</i> | chr4:109651528-109657853  | 0.2222   | 0.4591   | 1.0472  | 0.268558 |
| <i>Cdc42bpa</i>      | chr1:179960471-180165603  | 0.0569   | 0.0995   | 0.8059  | 0.162940 |
| <i>Gm26768</i>       | chr8:34094547-34096149    | 10.0526  | 8.1132   | -0.3092 | 0.003039 |
| <i>Gm23119</i>       | chr18:74778560-74778700   | 91.5761  | 125.4104 | 0.4536  | 0.184432 |
| <i>Hcst</i>          | chr7:30417716-30419854    | 143.8855 | 122.5382 | -0.2317 | 0.061358 |
| <i>Gm11723</i>       | chr11:117783325-117785055 | 14.8852  | 11.3007  | -0.3975 | 0.039949 |
| <i>1110001J03Rik</i> | chr6:38533501-38539449    | 12.9451  | 9.7104   | -0.4148 | 0.062402 |
| <i>Tpra1</i>         | chr6:88902250-88912238    | 16.3761  | 14.0373  | -0.2223 | 0.069513 |
| <i>Magee1</i>        | chrX:105120395-105123909  | 1.5175   | 1.9692   | 0.3759  | 0.092133 |
| <i>Frdm5</i>         | chr2:121545528-121807087  | 0.0723   | 0.1464   | 1.0184  | 0.103553 |
| <i>Rnf144a</i>       | chr12:26306796-26415256   | 15.4527  | 13.5892  | -0.1854 | 0.044747 |
| <i>Gm13050</i>       | chr4:143242023-143243368  | 21.3269  | 27.8359  | 0.3843  | 0.196519 |
| <i>4933406P04Rik</i> | chr10:20310505-20312294   | 2.1287   | 2.8509   | 0.4214  | 0.101670 |
| <i>Impdh1</i>        | chr6:29200433-29216364    | 26.4835  | 23.0815  | -0.1984 | 0.057019 |
| <i>Bmi1</i>          | chr2:18677017-18686629    | 18.8738  | 20.7960  | 0.1399  | 0.030215 |
| <i>Kbtbd11</i>       | chr8:15011024-15033330    | 90.4454  | 80.9379  | -0.1602 | 0.041607 |
| <i>1700065D16Rik</i> | chr9:95855551-95858320    | 1.0850   | 0.7482   | -0.5362 | 0.011254 |
| <i>Plekhh1</i>       | chr12:79029162-79081648   | 2.2517   | 1.7616   | -0.3542 | 0.101383 |
| <i>Epb4.114a</i>     | chr18:33796326-34007206   | 1.1682   | 1.5318   | 0.3910  | 0.059845 |
| <i>Crat</i>          | chr2:30400470-30415813    | 0.8784   | 1.1418   | 0.3783  | 0.080483 |
| <i>Ginm1</i>         | chr10:7767946-7792800     | 15.6230  | 17.7229  | 0.1819  | 0.035015 |
| <i>Heatr9</i>        | chr11:83511735-83522175   | 2.0310   | 2.8745   | 0.5011  | 0.189443 |
| <i>Lgals3bp</i>      | chr11:118392750-118402092 | 35.3926  | 42.3297  | 0.2582  | 0.209823 |
| <i>Ijf12712a</i>     | chr12:103442166-103443680 | 162.8578 | 231.4200 | 0.5069  | 0.147591 |
| <i>Chic1</i>         | chrX:103356475-103396092  | 0.0997   | 0.1862   | 0.9014  | 0.138122 |
| <i>Gm26675</i>       | chr16:3862383-3884505     | 14.0658  | 11.4741  | -0.2938 | 0.083301 |
| <i>Rabif</i>         | chr1:134494659-134507882  | 25.5084  | 22.0766  | -0.2085 | 0.030912 |
| <i>Epg5</i>          | chr18:77938466-78035027   | 13.1513  | 11.5205  | -0.1910 | 0.065680 |
| <i>Ttn</i>           | chr2:76703979-76982547    | 0.1000   | 0.1682   | 0.7509  | 0.232707 |
| <i>Acot11</i>        | chr4:106744554-106804998  | 1.1739   | 1.5791   | 0.4278  | 0.163889 |
| <i>Fbxo42</i>        | chr4:141147912-141204062  | 6.5461   | 5.5345   | -0.2422 | 0.084393 |
| <i>1700001L05Rik</i> | chr15:83357525-83367282   | 0.2418   | 0.4696   | 0.9578  | 0.151962 |
| <i>Psap</i>          | chr10:60277626-60302597   | 151.3292 | 133.1025 | -0.1852 | 0.085607 |
| <i>Tcrg-V4</i>       | chr13:19184980-19185501   | 7.3264   | 4.6956   | -0.6418 | 0.095168 |
| <i>Tmed2</i>         | chr5:124540694-124550506  | 9.6231   | 7.7510   | -0.3121 | 0.089342 |

|                      |                           |          |          |         |          |
|----------------------|---------------------------|----------|----------|---------|----------|
| <i>Tmtc1</i>         | chr6:148232429-148444389  | 0.0842   | 0.1513   | 0.8460  | 0.035928 |
| <i>Rps25</i>         | chr9:44407713-44410405    | 41.9994  | 33.4880  | -0.3267 | 0.146811 |
| <i>Ddx6</i>          | chr9:44604891-44640731    | 47.0562  | 53.2794  | 0.1792  | 0.204259 |
| <i>lft46</i>         | chr9:44767907-44792714    | 4.8923   | 5.6632   | 0.2111  | 0.105386 |
| <i>Khnyh</i>         | chr14:55884968-55896781   | 33.8718  | 30.2253  | -0.1643 | 0.036227 |
| <i>Cyp4f17</i>       | chr17:32506461-32528894   | 3.7320   | 2.7216   | -0.4555 | 0.124830 |
| <i>C030034I22Rik</i> | chr17:69417460-69418931   | 10.7622  | 8.9632   | -0.2639 | 0.011448 |
| <i>Nus1</i>          | chr10:52417546-52440192   | 13.1291  | 11.5207  | -0.1885 | 0.024071 |
| <i>Itgb3</i>         | chr11:104607999-104670476 | 9.6175   | 8.2281   | -0.2251 | 0.088416 |
| <i>Mef2a</i>         | chr7:67231162-67372858    | 17.6849  | 19.7395  | 0.1586  | 0.120334 |
| <i>U2af1</i>         | chr17:31647081-31658754   | 25.4238  | 29.6771  | 0.2232  | 0.125203 |
| <i>Ints3</i>         | chr3:90391379-90433636    | 14.8875  | 13.1734  | -0.1765 | 0.028480 |
| <i>Trpt1</i>         | chr19:6996130-6999044     | 5.5867   | 4.1392   | -0.4327 | 0.068564 |
| <i>Nckap5l</i>       | chr15:99422034-99457748   | 6.3997   | 5.2499   | -0.2857 | 0.126748 |
| <i>Als2</i>          | chr1:59162925-59237231    | 4.7492   | 4.1185   | -0.2056 | 0.019832 |
| <i>mt-Nd2</i>        | chrM:3913-4951            | 79.1040  | 114.9980 | 0.5398  | 0.131875 |
| <i>Lmln</i>          | chr16:33062520-33127695   | 0.5522   | 0.3902   | -0.5010 | 0.024194 |
| <i>Mdm2</i>          | chr10:117688887-117710758 | 26.8179  | 23.5752  | -0.1859 | 0.052571 |
| <i>Chchd5</i>        | chr2:129129699-129134134  | 7.7392   | 9.3660   | 0.2752  | 0.126971 |
| <i>Abca7</i>         | chr10:79996493-80015572   | 31.2306  | 27.9260  | -0.1614 | 0.041265 |
| <i>Trim28</i>        | chr7:13024151-13031035    | 65.5433  | 58.8470  | -0.1555 | 0.035809 |
| <i>Cenpm</i>         | chr15:82233778-82244747   | 0.7137   | 1.2084   | 0.7596  | 0.058612 |
| <i>Rit1</i>          | chr3:88716837-88731049    | 9.1674   | 10.2546  | 0.1617  | 0.023322 |
| <i>Spef1</i>         | chr2:131170260-131187282  | 2.5757   | 2.0067   | -0.3601 | 0.016332 |
| <i>Trim32</i>        | chr4:65604985-65616238    | 5.0467   | 4.1650   | -0.2770 | 0.029004 |
| <i>Trim11</i>        | chr11:58978092-58991458   | 26.9097  | 23.8931  | -0.1715 | 0.032910 |
| <i>Atp6v1d</i>       | chr12:78842988-78861638   | 73.6543  | 83.1608  | 0.1751  | 0.110697 |
| <i>Gm25789</i>       | chr1:161038307-161038383  | 49.3993  | 32.3372  | -0.6113 | 0.095397 |
| <i>Adamts10</i>      | chr17:33524203-33553782   | 37.5126  | 33.7856  | -0.1510 | 0.017341 |
| <i>Adat2</i>         | chr10:13552893-13563376   | 3.2850   | 4.1958   | 0.3530  | 0.039259 |
| <i>Gm11695</i>       | chr11:115462044-115463454 | 11.9702  | 8.7211   | -0.4569 | 0.048529 |
| <i>Pds5b</i>         | chr5:150673738-150810690  | 11.6043  | 13.2486  | 0.1912  | 0.182453 |
| <i>Sigirr</i>        | chr7:141091174-141100546  | 39.5537  | 34.6830  | -0.1896 | 0.053260 |
| <i>Arhgef3</i>       | chr14:27238038-27403904   | 116.6948 | 124.8913 | 0.0979  | 0.036845 |
| <i>App</i>           | chr16:84954439-85173707   | 1.6905   | 2.3927   | 0.5012  | 0.192120 |
| <i>Mob4</i>          | chr1:55131230-55154899    | 17.2428  | 14.5514  | -0.2448 | 0.102336 |
| <i>Usp50</i>         | chr2:126709095-126783458  | 0.5105   | 0.7879   | 0.6261  | 0.085988 |
| <i>BC017643</i>      | chr11:121222587-121229322 | 22.5042  | 19.1675  | -0.2315 | 0.095285 |
| <i>Ap2a1</i>         | chr7:44900372-44929496    | 13.9473  | 12.1176  | -0.2029 | 0.059486 |
| <i>Pxn</i>           | chr5:115506675-115555987  | 9.0972   | 10.2810  | 0.1765  | 0.135579 |
| <i>Tex22</i>         | chr12:113074501-113088917 | 1.6958   | 2.4123   | 0.5084  | 0.057111 |
| <i>Gm23991</i>       | chr7:44250449-44250542    | 39.3262  | 25.8274  | -0.6066 | 0.133009 |
| <i>Ndufs6</i>        | chr13:73319837-73328542   | 20.7092  | 26.7056  | 0.3669  | 0.174341 |
| <i>Asb14</i>         | chr14:26894556-26915258   | 0.3319   | 0.5559   | 0.7442  | 0.039749 |
| <i>H2-Q4</i>         | chr17:35379616-35385290   | 133.3208 | 119.0958 | -0.1628 | 0.052374 |
| <i>Smim24</i>        | chr10:81393050-81395392   | 2.0830   | 2.9767   | 0.5150  | 0.071108 |
| <i>Gm16235</i>       | chr10:88444235-88449887   | 4.0292   | 6.2532   | 0.6341  | 0.209300 |
| <i>Mis18bp1</i>      | chr12:65132733-65172604   | 1.1376   | 1.5314   | 0.4289  | 0.219754 |
| <i>Hist1h2bh</i>     | chr13:23542923-23543359   | 11.8410  | 15.9710  | 0.4317  | 0.177242 |
| <i>Chn2</i>          | chr6:54039553-54301810    | 0.5706   | 0.8166   | 0.5173  | 0.129560 |
| <i>Spef2</i>         | chr15:9578192-9748868     | 1.1784   | 1.4423   | 0.2916  | 0.098177 |
| <i>Gm16565</i>       | chr1:165781074-165789367  | 12.6869  | 10.2195  | -0.3120 | 0.146764 |
| <i>Pltp</i>          | chr2:164839517-164857711  | 8.6251   | 7.1654   | -0.2675 | 0.081622 |
| <i>Atox1</i>         | chr11:55446640-55461239   | 42.9111  | 34.2908  | -0.3235 | 0.117770 |
| <i>4921522P10Rik</i> | chr8:8661800-8664728      | 1.1926   | 0.7452   | -0.6784 | 0.088035 |
| <i>Cfl1</i>          | chr19:5490484-5494029     | 463.0021 | 544.7787 | 0.2347  | 0.198907 |
| <i>Pcgf6</i>         | chr19:47033618-47050845   | 20.0422  | 17.1080  | -0.2284 | 0.068908 |
| <i>Rad54b</i>        | chr4:11558919-11615805    | 0.3750   | 0.5220   | 0.4771  | 0.143860 |
| <i>Gli1</i>          | chr10:127329888-127341589 | 4.0761   | 3.3236   | -0.2944 | 0.062019 |
| <i>Mgat1</i>         | chr11:49244190-49263030   | 16.1848  | 14.0421  | -0.2049 | 0.086281 |
| <i>Preli1</i>        | chr13:55322054-55325271   | 70.6312  | 82.7452  | 0.2284  | 0.168517 |
| <i>Yes1</i>          | chr5:32611170-32687066    | 0.2060   | 0.3731   | 0.8568  | 0.098364 |
| <i>Gm23245</i>       | chr5:129789538-129789673  | 17.1547  | 10.4871  | -0.7100 | 0.088952 |
| <i>4933404O12Rik</i> | chr5:136919145-136937112  | 0.4826   | 0.2900   | -0.7346 | 0.065365 |
| <i>Isoc2a</i>        | chr7:4877052-4895717      | 13.7611  | 10.9563  | -0.3288 | 0.109272 |
| <i>U2af114</i>       | chr7:30563300-30567960    | 29.4762  | 26.0849  | -0.1763 | 0.035329 |
| <i>Gm26733</i>       | chr9:20432759-20563282    | 16.2555  | 18.6511  | 0.1983  | 0.088477 |
| <i>Rnf26</i>         | chr9:44066326-44113517    | 1.3438   | 1.0122   | -0.4088 | 0.057735 |
| <i>Trav21-dv12</i>   | chr14:53875983-53876751   | 5.9618   | 3.6641   | -0.7023 | 0.050311 |
| <i>Sorbs3</i>        | chr14:70180467-70207637   | 0.5023   | 0.2947   | -0.7693 | 0.021616 |
| <i>Alcam</i>         | chr16:52248995-52454074   | 0.8378   | 1.2054   | 0.5247  | 0.228043 |

|                      |                           |          |          |         |          |
|----------------------|---------------------------|----------|----------|---------|----------|
| <i>Slco4a1</i>       | chr2:180456244-180474867  | 0.5593   | 0.3781   | -0.5648 | 0.022333 |
| <i>H2afz</i>         | chr3:137864486-137866922  | 8.8284   | 10.5189  | 0.2528  | 0.094628 |
| <i>Gbp7</i>          | chr3:142530337-142550083  | 52.2618  | 58.1800  | 0.1548  | 0.129961 |
| <i>Gppp1l1</i>       | chr4:116557657-116593882  | 49.2591  | 53.3361  | 0.1147  | 0.056684 |
| <i>Clic4</i>         | chr4:135213968-135272814  | 3.9582   | 4.5120   | 0.1889  | 0.084971 |
| <i>Cd68</i>          | chr11:69664212-69666153   | 5.4736   | 6.7890   | 0.3107  | 0.078258 |
| <i>Fbxl6</i>         | chr15:76535729-76538746   | 25.4117  | 22.2004  | -0.1949 | 0.026410 |
| <i>Bhlhe40</i>       | chr6:108660628-108666925  | 0.6434   | 1.4492   | 1.1716  | 0.121051 |
| <i>Inafm1</i>        | chr7:16272013-16273692    | 6.4966   | 5.1769   | -0.3276 | 0.071118 |
| <i>Sft2d1</i>        | chr17:8311101-8396852     | 7.7677   | 6.3902   | -0.2816 | 0.121524 |
| <i>Ms4a6b</i>        | chr19:11516511-11531256   | 388.0363 | 427.9769 | 0.1413  | 0.153281 |
| <i>Gmcl1</i>         | chr6:86691767-86733378    | 8.5254   | 7.3972   | -0.2048 | 0.017394 |
| <i>Pdcd11</i>        | chr19:47090765-47131143   | 22.2663  | 20.1400  | -0.1448 | 0.009394 |
| <i>Kctd12b</i>       | chrX:153685153-153696391  | 0.1719   | 0.2952   | 0.7797  | 0.034760 |
| <i>Syk</i>           | chr13:52583172-52648792   | 0.1649   | 0.2723   | 0.7238  | 0.166484 |
| <i>Slc28a2</i>       | chr2:122426476-122461137  | 52.8243  | 46.2237  | -0.1926 | 0.064173 |
| <i>Eps15</i>         | chr4:109280267-109387817  | 16.3724  | 18.1161  | 0.1460  | 0.102736 |
| <i>Tcrg-V1</i>       | chr13:19340015-19340454   | 2.3071   | 4.3765   | 0.9237  | 0.084865 |
| <i>Sirt7</i>         | chr11:120618371-120625240 | 37.8802  | 34.3462  | -0.1413 | 0.005494 |
| <i>Eif3f</i>         | chr7:108934416-108942951  | 80.4189  | 68.3359  | -0.2349 | 0.131733 |
| <i>Gm23262</i>       | chr7:111076059-111076227  | 773.0312 | 494.4328 | -0.6448 | 0.150627 |
| <i>Gm26532</i>       | chr8:84208919-84209609    | 13.7628  | 10.4717  | -0.3943 | 0.103741 |
| <i>Trim30b</i>       | chr7:104355381-104369884  | 0.3798   | 0.6099   | 0.6833  | 0.188614 |
| <i>Atp2b4</i>        | chr1:133702673-133801041  | 1.3027   | 2.0624   | 0.6628  | 0.165502 |
| <i>Cmklr1</i>        | chr5:113612353-113650426  | 0.1549   | 0.3474   | 1.1657  | 0.159646 |
| <i>Gm12183</i>       | chr11:48751759-48753770   | 6.8240   | 7.8376   | 0.1998  | 0.003078 |
| <i>Camkk1</i>        | chr11:73019007-73042073   | 2.5282   | 2.0559   | -0.2983 | 0.005580 |
| <i>AA465934</i>      | chr11:83291698-83294632   | 6.5310   | 4.5197   | -0.5311 | 0.109379 |
| <i>NA</i>            | chr12:55239325-55263020   | 6.3223   | 7.3908   | 0.2253  | 0.048221 |
| <i>At1l</i>          | chr12:69893104-69964085   | 0.2689   | 0.5081   | 0.9178  | 0.147069 |
| <i>Dapk1</i>         | chr13:60601946-60763185   | 0.9506   | 0.7054   | -0.4304 | 0.065437 |
| <i>Snx17</i>         | chr5:31193226-31198900    | 30.0893  | 26.9506  | -0.1589 | 0.012445 |
| <i>Aacs</i>          | chr5:125475813-125517412  | 9.4940   | 7.9610   | -0.2541 | 0.085418 |
| <i>E230016M11Rik</i> | chr6:67036598-67080654    | 0.8854   | 0.6177   | -0.5194 | 0.012222 |
| <i>Eps8l1</i>        | chr7:4460673-4479404      | 10.1036  | 5.2414   | -0.9468 | 0.138842 |
| <i>Rpl28</i>         | chr7:4792873-4794562      | 4.0122   | 5.1634   | 0.3639  | 0.082384 |
| <i>Zfp36</i>         | chr7:28376783-28379255    | 31.0614  | 35.8886  | 0.2084  | 0.156693 |
| <i>Pdcd5</i>         | chr7:35641981-35647521    | 6.1993   | 7.2651   | 0.2289  | 0.109706 |
| <i>Gm26827</i>       | chr7:66109514-66173121    | 32.2226  | 38.4686  | 0.2556  | 0.234561 |
| <i>Relt</i>          | chr7:100845847-100863446  | 18.7620  | 16.3520  | -0.1983 | 0.065966 |
| <i>Gm1966</i>        | chr7:106601242-106604035  | 146.6748 | 162.0314 | 0.1437  | 0.148873 |
| <i>Ndufab1</i>       | chr7:122085402-122101886  | 3.9451   | 3.2908   | -0.2616 | 0.083221 |
| <i>B130055M24Rik</i> | chr7:127448635-127460360  | 20.7870  | 18.1601  | -0.1949 | 0.022107 |
| <i>Fuom</i>          | chr7:140096769-140102441  | 0.4916   | 0.3021   | -0.7028 | 0.007186 |
| <i>Hsh2d</i>         | chr8:72189667-72200995    | 24.1101  | 27.4403  | 0.1867  | 0.113602 |
| <i>Gm5909</i>        | chr8:80110805-80112086    | 0.8446   | 0.4277   | -0.9815 | 0.029528 |
| <i>Gm24629</i>       | chr8:105203992-105204081  | 13.7900  | 7.7920   | -0.8235 | 0.011198 |
| <i>Atp6v0d1</i>      | chr8:105524464-105566047  | 25.2979  | 22.0207  | -0.2002 | 0.038936 |
| <i>Il10ra</i>        | chr9:45253836-45269149    | 18.0630  | 21.8475  | 0.2744  | 0.221256 |
| <i>Gm10642</i>       | chr9:70656250-70657860    | 10.5095  | 8.6984   | -0.2729 | 0.054919 |
| <i>Pcbp4</i>         | chr9:106453837-106464007  | 1.7675   | 2.3300   | 0.3986  | 0.052941 |
| <i>Gm9208</i>        | chrX:107279014-107279962  | 1.5831   | 2.6287   | 0.7316  | 0.272854 |
| <i>Hsd17b10</i>      | chrX:152001844-152004442  | 31.3026  | 36.1799  | 0.2089  | 0.120959 |
| <i>Txlng</i>         | chrX:162778918-162829454  | 6.1166   | 6.7872   | 0.1501  | 0.043182 |
| <i>Wdyh1</i>         | chr15:58141435-58158652   | 22.5137  | 19.4928  | -0.2079 | 0.018945 |
| <i>Parp10</i>        | chr15:76231173-76243441   | 23.8419  | 20.6847  | -0.2049 | 0.076819 |
| <i>Sp1</i>           | chr15:102406142-102436404 | 33.0827  | 35.9520  | 0.1200  | 0.088364 |
| <i>Traj26</i>        | chr14:54194489-54194549   | 55.2501  | 38.0663  | -0.5375 | 0.049502 |
| <i>Rfx2</i>          | chr17:56775896-56831008   | 1.4277   | 1.8291   | 0.3574  | 0.066062 |
| <i>Rmi2</i>          | chr16:10835058-10892966   | 4.0181   | 3.3473   | -0.2635 | 0.057828 |
| <i>lqcg</i>          | chr16:33015384-33056218   | 1.4507   | 1.9147   | 0.4003  | 0.103229 |
| <i>C130036L24Rik</i> | chr1:86359573-86373791    | 3.6465   | 2.9636   | -0.2992 | 0.058966 |
| <i>Pax6</i>          | chr2:105668895-105698410  | 0.0844   | 0.1434   | 0.7643  | 0.208183 |
| <i>Rpl22l1</i>       | chr3:28805435-28807352    | 121.1776 | 79.7814  | -0.6030 | 0.151562 |
| <i>Gbp3</i>          | chr3:142560051-142573209  | 16.7448  | 18.8821  | 0.1733  | 0.124569 |
| <i>Gm12917</i>       | chr4:124718998-124719637  | 3.8913   | 2.5364   | -0.6174 | 0.042199 |
| <i>Kdm1a</i>         | chr4:136550539-136602723  | 24.0830  | 21.4905  | -0.1643 | 0.033991 |
| <i>Gm13068</i>       | chr4:149748517-149749607  | 2.0275   | 1.2110   | -0.7436 | 0.054171 |
| <i>Traj8</i>         | chr14:54209917-54209954   | 28.5867  | 14.8734  | -0.9426 | 0.045888 |
| <i>Rab3gap2</i>      | chr1:185204167-185286743  | 12.2893  | 10.8837  | -0.1752 | 0.041734 |
| <i>Slc37a1</i>       | chr17:31295482-31350696   | 20.3435  | 17.7931  | -0.1932 | 0.071675 |



|                      |                           |          |          |         |          |
|----------------------|---------------------------|----------|----------|---------|----------|
| <i>Pank3</i>         | chr11:35769483-35791285   | 22.3774  | 19.1719  | -0.2230 | 0.121709 |
| <i>Rbbp4</i>         | chr4:129307099-129335370  | 25.3331  | 22.1032  | -0.1968 | 0.074025 |
| <i>Gm13854</i>       | chr6:33375110-33377446    | 0.4653   | 1.0489   | 1.1726  | 0.295060 |
| <i>O610007P14Rik</i> | chr12:85815447-85824550   | 6.7030   | 7.7472   | 0.2089  | 0.132637 |
| <i>Vkorc1l1</i>      | chr5:129942108-129984745  | 4.2911   | 3.4545   | -0.3129 | 0.073199 |
| <i>Brat1</i>         | chr5:140705010-140719379  | 8.9014   | 7.7707   | -0.1960 | 0.050926 |
| <i>Umps</i>          | chr16:33954781-33967038   | 15.8338  | 13.7698  | -0.2015 | 0.039363 |
| <i>Btg2</i>          | chr1:134075169-134079120  | 101.6959 | 91.7461  | -0.1485 | 0.008964 |
| <i>NA</i>            | chr3:40950630-40977793    | 14.9388  | 17.1356  | 0.1979  | 0.109922 |
| <i>Rad18</i>         | chr6:112619849-112696686  | 5.7888   | 6.5389   | 0.1758  | 0.103675 |
| <i>Fbxl12os</i>      | chr9:20607480-20617271    | 1.0476   | 0.7493   | -0.4835 | 0.093278 |
| <i>Commd3</i>        | chr2:18672383-18676231    | 29.5512  | 33.2432  | 0.1698  | 0.140230 |
| <i>Pole3</i>         | chr4:62522648-62525068    | 10.5054  | 12.3093  | 0.2286  | 0.115548 |
| <i>Pml</i>           | chr9:58218075-58249786    | 11.4588  | 13.5676  | 0.2437  | 0.236095 |
| <i>Gm9843</i>        | chr16:76403208-76403712   | 21.5655  | 14.9649  | -0.5271 | 0.164568 |
| <i>Klf16</i>         | chr10:80567123-80577321   | 8.7124   | 7.2650   | -0.2621 | 0.095649 |
| <i>Arhgap9</i>       | chr10:127323726-127329943 | 129.1496 | 115.1482 | -0.1656 | 0.068916 |
| <i>Ccl5</i>          | chr11:83525777-83530518   | 47.8584  | 71.8389  | 0.5860  | 0.148493 |
| <i>Gm11775</i>       | chr11:121029401-121052357 | 31.5240  | 26.5139  | -0.2497 | 0.069960 |
| <i>Gt(ROSA)26Sor</i> | chr6:113067427-113077333  | 22.2032  | 18.6384  | -0.2525 | 0.111667 |
| <i>Gm16161</i>       | chr6:113275836-113276930  | 4.2560   | 2.3599   | -0.8508 | 0.029734 |
| <i>Myopos</i>        | chr7:18993552-19001222    | 13.5941  | 10.6499  | -0.3521 | 0.049408 |
| <i>Gm9905</i>        | chr7:121033251-121035096  | 3.9734   | 2.9439   | -0.4327 | 0.118765 |
| <i>Ufsp2</i>         | chr8:45975527-45996958    | 11.2274  | 12.6130  | 0.1679  | 0.062597 |
| <i>Ocel1</i>         | chr8:71371297-71379361    | 7.7423   | 6.8028   | -0.1866 | 0.031093 |
| <i>Nr2f6</i>         | chr8:71374122-71381960    | 5.2776   | 4.3838   | -0.2677 | 0.051171 |
| <i>Kars</i>          | chr8:111993439-112011323  | 66.4057  | 72.5888  | 0.1284  | 0.078390 |
| <i>Tbcel</i>         | chr9:42412315-42507809    | 20.9747  | 19.0207  | -0.1411 | 0.004061 |
| <i>March6</i>        | chr15:31455898-31531037   | 22.3791  | 19.3798  | -0.2076 | 0.108490 |
| <i>Pou6f1</i>        | chr15:100575317-100599984 | 5.3648   | 6.8489   | 0.3524  | 0.230963 |
| <i>Pde1b</i>         | chr15:103503297-103530052 | 9.3423   | 7.8174   | -0.2571 | 0.089981 |
| <i>Trav12-1</i>      | chr14:53538259-53538738   | 7.2342   | 4.5474   | -0.6698 | 0.073076 |
| <i>Gm6776</i>        | chr19:43280797-43281697   | 1.8934   | 2.7765   | 0.5523  | 0.072415 |
| <i>Eij2d</i>         | chr1:131153180-131187658  | 13.5267  | 11.8833  | -0.1869 | 0.067354 |
| <i>Rae1</i>          | chr2:173000116-173015739  | 36.6321  | 32.7126  | -0.1633 | 0.016016 |
| <i>Klk8</i>          | chr7:43797576-43803822    | 29.3261  | 41.6243  | 0.5052  | 0.099652 |
| <i>Sult2b1</i>       | chr7:45729982-45759612    | 2.7998   | 3.5647   | 0.3484  | 0.064646 |
| <i>Rec8</i>          | chr14:55618036-55625395   | 0.3883   | 0.1986   | -0.9672 | 0.038841 |
| <i>1600002K03Rik</i> | chr10:80172943-80175146   | 11.9452  | 8.9990   | -0.4086 | 0.107638 |
| <i>Amh</i>           | chr10:80805247-80807648   | 0.6252   | 0.3320   | -0.9131 | 0.030690 |
| <i>Rbms2</i>         | chr10:128129469-128180297 | 2.1933   | 2.6403   | 0.2676  | 0.157065 |
| <i>Rad17</i>         | chr13:100617164-100651059 | 19.1170  | 21.1045  | 0.1427  | 0.039306 |
| <i>Cnga1</i>         | chr5:72603695-72642752    | 5.9826   | 4.6583   | -0.3610 | 0.207928 |
| <i>Yipf4</i>         | chr17:74489492-74500277   | 28.2700  | 24.0145  | -0.2354 | 0.082156 |
| <i>Uxs1</i>          | chr1:43746965-43827800    | 2.9974   | 3.4985   | 0.2230  | 0.088214 |
| <i>NA</i>            | chr1:133131179-133131782  | 19.7209  | 15.5528  | -0.3425 | 0.104388 |
| <i>Fam78b</i>        | chr1:167001416-167091302  | 0.1341   | 0.2570   | 0.9383  | 0.080736 |
| <i>Gm13625</i>       | chr2:69871411-69872202    | 27.6036  | 32.8397  | 0.2506  | 0.123477 |
| <i>Zc3h6</i>         | chr2:128967401-129018563  | 8.0065   | 9.3817   | 0.2287  | 0.185534 |
| <i>Gm20689</i>       | chr3:68900170-68900449    | 4.9154   | 7.2248   | 0.5556  | 0.002427 |
| <i>Tlr2</i>          | chr3:83836272-83841767    | 4.0242   | 3.2007   | -0.3303 | 0.077858 |
| <i>Usp1</i>          | chr4:98923809-98935543    | 20.4089  | 22.3926  | 0.1338  | 0.040676 |
| <i>Tbk1</i>          | chr10:121546454-121586794 | 35.6757  | 38.4138  | 0.1067  | 0.009473 |
| <i>Gm12912</i>       | chr4:75147608-75148989    | 0.7214   | 0.3850   | -0.9060 | 0.014566 |
| <i>Gm10615</i>       | chr9:110117702-110119916  | 5.3940   | 4.3841   | -0.2991 | 0.047451 |
| <i>Vgll4</i>         | chr6:114860627-114969994  | 28.9490  | 25.6635  | -0.1738 | 0.039728 |
| <i>Art2a-ps</i>      | chr7:101552452-101560865  | 11.1698  | 9.2483   | -0.2724 | 0.034723 |
| <i>Zfp866</i>        | chr8:69761325-69791178    | 20.6371  | 18.4973  | -0.1579 | 0.019734 |
| <i>Klf15</i>         | chr9:122951080-123018725  | 3.6576   | 4.6577   | 0.3487  | 0.258629 |
| <i>Ggt7</i>          | chr2:155490378-155518237  | 2.1824   | 1.5950   | -0.4524 | 0.178030 |
| <i>Acads</i>         | chr5:115110298-115119346  | 11.7814  | 10.1121  | -0.2204 | 0.032495 |
| <i>Gm17477</i>       | chr9:80118894-80121937    | 8.3978   | 6.6767   | -0.3309 | 0.157717 |
| <i>NA</i>            | chr15:76622087-76626027   | 174.4692 | 193.9255 | 0.1525  | 0.131990 |
| <i>Nudt8</i>         | chr19:4000579-4005816     | 4.2645   | 5.0713   | 0.2500  | 0.138945 |
| <i>Ccdc59</i>        | chr10:105841066-105847833 | 15.1223  | 16.6338  | 0.1374  | 0.078604 |
| <i>Gm24029</i>       | chr11:69667833-69667976   | 26.9325  | 17.6561  | -0.6092 | 0.139814 |
| <i>Gm21092</i>       | chr8:20550330-20581999    | 1.4365   | 1.8407   | 0.3577  | 0.141431 |
| <i>Pomgnt2</i>       | chr9:121981605-121996026  | 0.4762   | 0.2466   | -0.9494 | 0.101517 |
| <i>Gm7331</i>        | chrX:162566815-162567309  | 2.2267   | 3.5118   | 0.6573  | 0.049100 |
| <i>Slc39a14</i>      | chr14:70303468-70351425   | 4.7855   | 4.1851   | -0.1934 | 0.046031 |
| <i>Tsr1</i>          | chr11:74898070-74909342   | 41.7632  | 37.2781  | -0.1639 | 0.026133 |

|               |                           |          |          |         |          |
|---------------|---------------------------|----------|----------|---------|----------|
| Gm11706       | chr11:106814669-106816008 | 12.7129  | 8.9126   | -0.5124 | 0.089375 |
| Twistnb       | chr12:33429623-33439380   | 21.2125  | 23.8636  | 0.1699  | 0.099471 |
| Hspa8         | chr9:40800983-40805200    | 126.8601 | 147.9297 | 0.2217  | 0.210196 |
| Gm16262       | chr9:94695703-94702319    | 0.7795   | 1.1848   | 0.6039  | 0.107822 |
| Atp11c        | chrX:60223289-60592698    | 16.1925  | 17.8366  | 0.1395  | 0.115514 |
| Calm2         | chr17:87433411-87446935   | 77.1740  | 87.3184  | 0.1782  | 0.168851 |
| Usp25         | chr16:77014068-77116779   | 67.8200  | 72.5234  | 0.0967  | 0.045624 |
| Gm15965       | chr16:90983906-90987237   | 1.4843   | 0.9532   | -0.6389 | 0.066228 |
| Pyhin1        | chr1:173630858-173647928  | 119.1835 | 134.0461 | 0.1695  | 0.175444 |
| A230005M16Rik | chr2:25705849-25709716    | 0.2792   | 0.5680   | 1.0246  | 0.109227 |
| Tmbim4        | chr10:120201589-120224917 | 3.8772   | 4.5997   | 0.2466  | 0.033283 |
| Plekha5       | chr6:140424098-140594906  | 7.9343   | 8.9432   | 0.1727  | 0.117163 |
| Gm13341       | chr2:22587290-22587962    | 1.9282   | 2.8947   | 0.5861  | 0.035713 |
| Gm12504       | chr4:44121892-44124123    | 0.6417   | 0.9820   | 0.6138  | 0.075570 |
| Thbs1         | chr2:118111875-118127133  | 0.1012   | 0.1992   | 0.9768  | 0.127581 |
| Kif18b        | chr11:102905528-102925124 | 1.0229   | 1.5990   | 0.6445  | 0.258175 |
| Gbp4          | chr5:105115766-105139586  | 78.1793  | 88.2430  | 0.1747  | 0.179169 |
| Fam63b        | chr9:70599013-70657174    | 26.3853  | 23.6437  | -0.1583 | 0.041135 |
| Gm9770        | chr10:130412498-130413312 | 0.9725   | 1.6329   | 0.7476  | 0.043899 |
| Acap1         | chr11:69881566-69895539   | 92.7605  | 81.7649  | -0.1820 | 0.080915 |
| 4930427A07Rik | chr12:113156420-113165456 | 2.2463   | 1.7254   | -0.3806 | 0.086445 |
| Pcalce        | chr5:137605102-137613784  | 2.9607   | 2.4084   | -0.2979 | 0.047070 |
| Gm14820       | chrX:8049171-8074619      | 4.8496   | 3.8491   | -0.3334 | 0.045121 |
| Atp8b4        | chr2:126320972-126500674  | 46.2387  | 52.2552  | 0.1765  | 0.228501 |
| Tgfbr1        | chr4:47353221-47414931    | 14.5584  | 12.9698  | -0.1667 | 0.029768 |
| Sjfn5         | chr11:82951348-82962941   | 21.9056  | 26.6847  | 0.2847  | 0.248181 |
| Rab10         | chr12:3247429-3309969     | 56.3714  | 61.5495  | 0.1268  | 0.077343 |
| Hps5          | chr7:46760465-46796064    | 12.7821  | 11.4264  | -0.1618 | 0.018070 |
| 4933440M02Rik | chr7:125329642-125349772  | 4.4626   | 3.4764   | -0.3603 | 0.156859 |
| Rps6ka3       | chrX:159210306-159368244  | 20.1522  | 23.4066  | 0.2160  | 0.258504 |
| Ddx17         | chr15:79527706-79546741   | 113.9467 | 102.0434 | -0.1592 | 0.050214 |
| Nme7          | chr1:164312878-164348181  | 13.5823  | 15.7068  | 0.2097  | 0.006191 |
| Ube2d2a       | chr18:35771558-35807172   | 22.5168  | 24.9669  | 0.1490  | 0.085912 |
| Mrpl48-ps     | chr4:88599174-88599810    | 2.7338   | 4.3987   | 0.6862  | 0.186733 |
| Pigh          | chr12:79080672-79089670   | 13.0387  | 11.1927  | -0.2202 | 0.040751 |
| Gm13833       | chr6:31102845-31104646    | 4.0756   | 5.8308   | 0.5167  | 0.212575 |
| Vps29         | chr5:122354368-122364984  | 13.2478  | 15.1266  | 0.1913  | 0.144612 |
| Zfp605        | chr5:110110091-110129794  | 5.7234   | 6.7847   | 0.2454  | 0.140158 |
| Act2          | chr17:12942889-12960747   | 6.6949   | 5.5832   | -0.2620 | 0.056085 |
| 4930502E09Rik | chr11:84829177-84830868   | 2.5478   | 1.6020   | -0.6694 | 0.046385 |
| Nemf          | chr12:69311543-69357176   | 44.7770  | 48.8426  | 0.1254  | 0.067106 |
| 2810474O19Rik | chr6:149309413-149335658  | 54.9793  | 60.6383  | 0.1413  | 0.133058 |
| Rhoa          | chr9:108306204-108337939  | 50.6457  | 57.3153  | 0.1785  | 0.161457 |
| Dennd3        | chr15:73512559-73572242   | 4.3681   | 3.6835   | -0.2459 | 0.089444 |
| Mllt1         | chr17:56892611-56935388   | 16.7589  | 14.3406  | -0.2248 | 0.126566 |
| Actr3         | chr1:125392904-125435727  | 155.0362 | 133.7392 | -0.2132 | 0.124855 |
| Cenph         | chr13:100759673-100775899 | 1.1545   | 1.6226   | 0.4910  | 0.080998 |
| Klre1         | chr6:129577892-129585824  | 5.3085   | 8.9573   | 0.7548  | 0.136017 |
| Cldnd2        | chr7:43440781-43443328    | 11.1052  | 8.7731   | -0.3401 | 0.031319 |
| A430078G23Rik | chr8:3353414-3390295      | 61.0616  | 53.9429  | -0.1788 | 0.076498 |
| Rpsud4        | chr9:35267864-35277731    | 12.5961  | 10.8396  | -0.2167 | 0.055691 |
| Gm20537       | chr9:88407431-88456616    | 45.9541  | 50.9896  | 0.1500  | 0.076304 |
| Ano10         | chr9:122175878-122294374  | 15.2548  | 12.9055  | -0.2413 | 0.132596 |
| Gm24523       | chr15:34440790-34440922   | 35.9766  | 25.6874  | -0.4860 | 0.111896 |
| Cd86          | chr16:36603868-36666081   | 3.0565   | 3.9836   | 0.3822  | 0.209278 |
| Pmpcb         | chr5:21737140-21757152    | 14.3070  | 15.6532  | 0.1297  | 0.057846 |
| Spred1        | chr2:117121373-117182279  | 3.8792   | 3.2667   | -0.2479 | 0.082841 |
| lcmt          | chr4:152297226-152307121  | 11.0382  | 9.6571   | -0.1928 | 0.056831 |
| Sepn1         | chr4:134537891-134552166  | 0.7771   | 1.0337   | 0.4117  | 0.029030 |
| Gm11346       | chr13:24597612-24604925   | 63.2567  | 69.4714  | 0.1352  | 0.105421 |
| Ubxn1         | chr19:8871558-8875663     | 108.1632 | 130.5570 | 0.2715  | 0.237936 |
| Rab29         | chr1:131867223-131872887  | 23.2492  | 20.0757  | -0.2117 | 0.046286 |
| Gng10         | chr4:59035087-59041903    | 28.5258  | 23.7765  | -0.2627 | 0.103284 |
| Depdc1a       | chr3:159495432-159529955  | 0.2603   | 0.4709   | 0.8549  | 0.224008 |
| Sytl1         | chr4:133253089-133263113  | 11.8499  | 10.1141  | -0.2285 | 0.077916 |
| Kiss1r        | chr10:79916970-79922273   | 0.5310   | 0.3364   | -0.6586 | 0.020294 |
| Gm25835       | chr11:69668851-69668995   | 161.1996 | 96.1248  | -0.7459 | 0.173013 |
| Gm26669       | chr12:80108033-80113000   | 17.4899  | 19.7741  | 0.1771  | 0.139132 |
| Gm26587       | chr13:67660456-67661445   | 3.8764   | 2.8677   | -0.4348 | 0.007220 |
| Nop14         | chr5:34638531-34660148    | 25.0910  | 27.3689  | 0.1254  | 0.033458 |
| Grk4          | chr5:34660378-34755305    | 1.3810   | 1.0860   | -0.3467 | 0.025021 |

|                      |                           |          |          |         |          |
|----------------------|---------------------------|----------|----------|---------|----------|
| <i>Gm10135</i>       | chr5:72965807-72974702    | 50.6952  | 61.7632  | 0.2849  | 0.150105 |
| <i>Rps15a-ps5</i>    | chr5:105797286-105797743  | 76.2196  | 51.4467  | -0.5671 | 0.151116 |
| <i>Selplg</i>        | chr5:113817797-113830501  | 256.4532 | 292.9194 | 0.1918  | 0.212400 |
| <i>Gm15497</i>       | chr5:138610738-138611289  | 3.1184   | 4.4268   | 0.5055  | 0.013050 |
| <i>Adipor2</i>       | chr6:119353149-119417483  | 34.1423  | 31.0107  | -0.1388 | 0.005157 |
| <i>Zik1</i>          | chr7:10487228-10495394    | 1.5756   | 1.1764   | -0.4215 | 0.102154 |
| <i>Cyp2s1</i>        | chr7:25802474-25816913    | 1.8280   | 1.3435   | -0.4443 | 0.162483 |
| <i>Med29</i>         | chr7:28386145-28392708    | 4.7253   | 3.6683   | -0.3653 | 0.020194 |
| <i>Capn12</i>        | chr7:28881655-28893585    | 3.0288   | 3.7481   | 0.3074  | 0.136369 |
| <i>Gm166</i>         | chr7:127582383-127588595  | 13.1048  | 14.8067  | 0.1762  | 0.116192 |
| <i>D830025C05Rik</i> | chr8:25597011-25597989    | 3.5634   | 4.6926   | 0.3971  | 0.089462 |
| <i>Dock3</i>         | chr9:106892833-107231909  | 0.1301   | 0.1852   | 0.5094  | 0.077374 |
| <i>Cxx1c</i>         | chrX:53607921-53609132    | 1.1519   | 1.6899   | 0.5529  | 0.009198 |
| <i>Phf20l1</i>       | chr15:66577571-66645255   | 62.7588  | 68.6623  | 0.1297  | 0.141742 |
| <i>Apobec3</i>       | chr15:79891658-79915906   | 30.0262  | 33.0744  | 0.1395  | 0.190292 |
| <i>NA</i>            | chr15:102528635-102529025 | 3.9385   | 5.9765   | 0.6017  | 0.139042 |
| <i>Kcnk5</i>         | chr14:20140057-20181782   | 1.4103   | 2.5541   | 0.8568  | 0.180291 |
| <i>Gch1</i>          | chr14:47153894-47189413   | 5.3265   | 4.4434   | -0.2615 | 0.028554 |
| <i>Travn-2</i>       | chr14:53345960-53346420   | 5.8246   | 3.8469   | -0.5985 | 0.003752 |
| <i>Traj27</i>        | chr14:54192302-54192361   | 62.3623  | 42.9296  | -0.5387 | 0.106666 |
| <i>Airn</i>          | chr17:12741310-12860122   | 2.9994   | 3.6861   | 0.2974  | 0.207886 |
| <i>Rasal3</i>        | chr17:32390658-32403583   | 108.6010 | 98.4807  | -0.1411 | 0.040021 |
| <i>Pgif</i>          | chr17:86997255-87025406   | 15.8460  | 13.2213  | -0.2613 | 0.052643 |
| <i>Ppil2</i>         | chr16:17086554-17111257   | 30.0447  | 32.0704  | 0.0941  | 0.031824 |
| <i>Ccdc186</i>       | chr19:56787480-56822190   | 8.0659   | 7.0989   | -0.1842 | 0.039986 |
| <i>Ccdc115</i>       | chr1:34436670-34439672    | 17.0946  | 20.1625  | 0.2381  | 0.170546 |
| <i>Ejfb5b</i>        | chr1:37998009-38055579    | 10.5688  | 11.6819  | 0.1445  | 0.113298 |
| <i>Ctla4</i>         | chr1:60886999-60915832    | 5.4699   | 6.7230   | 0.2976  | 0.238914 |
| <i>Blzf1</i>         | chr1:164289799-164307489  | 5.1255   | 5.8673   | 0.1950  | 0.119167 |
| <i>Pycr2</i>         | chr1:180904273-180908087  | 28.8050  | 24.3701  | -0.2412 | 0.106010 |
| <i>Tmco6</i>         | chr18:36735067-36742391   | 17.7264  | 15.5418  | -0.1897 | 0.012970 |
| <i>1700086O06Rik</i> | chr18:38238404-38250565   | 1.7244   | 1.2256   | -0.4926 | 0.045809 |
| <i>Csnk1g3</i>       | chr18:53862112-53955684   | 11.7522  | 13.2985  | 0.1783  | 0.174374 |
| <i>Itga4</i>         | chr2:79255425-79333123    | 46.9913  | 54.1243  | 0.2039  | 0.270043 |
| <i>Zcchc3</i>        | chr2:152411955-152415044  | 0.3187   | 0.1657   | -0.9437 | 0.087385 |
| <i>Gnb4</i>          | chr3:32580331-32616585    | 1.6995   | 1.3374   | -0.3457 | 0.191239 |
| <i>Rd3</i>           | chr1:191977372-191988282  | 0.1206   | 0.2185   | 0.8577  | 0.012048 |
| <i>Aim1</i>          | chr10:43950306-44004846   | 21.3046  | 23.3825  | 0.1343  | 0.146372 |
| <i>Rhob</i>          | chr12:8497762-8499985     | 2.3969   | 4.1684   | 0.7983  | 0.092454 |
| <i>Corin</i>         | chr5:72300024-72504473    | 0.3528   | 0.5209   | 0.5621  | 0.136909 |
| <i>Ppp2r1b</i>       | chr9:50845300-50894229    | 12.4527  | 11.1748  | -0.1562 | 0.025625 |
| <i>Ubac2</i>         | chr14:121878605-122021034 | 50.9388  | 45.1497  | -0.1740 | 0.068936 |
| <i>Lztr1</i>         | chr16:17508687-17526333   | 17.6359  | 15.8810  | -0.1512 | 0.018959 |
| <i>Chka</i>          | chr19:3851772-3894369     | 1.6109   | 1.3610   | -0.2432 | 0.054559 |
| <i>Smarca11</i>      | chr1:72583250-72633134    | 8.2363   | 7.2969   | -0.1747 | 0.022517 |
| <i>Lax1</i>          | chr1:133679028-133690108  | 64.0961  | 73.0272  | 0.1882  | 0.243083 |
| <i>Lrrtm2</i>        | chr18:35209010-35215024   | 0.2067   | 0.3203   | 0.6318  | 0.100482 |
| <i>Rbm27</i>         | chr18:42275352-42341542   | 19.4352  | 20.9984  | 0.1116  | 0.061866 |
| <i>Arl5a</i>         | chr2:52397950-52424901    | 13.0719  | 14.2071  | 0.1201  | 0.039129 |
| <i>Srsf6</i>         | chr2:162931527-162937121  | 109.9340 | 96.6060  | -0.1865 | 0.102831 |
| <i>Qsox1</i>         | chr1:155778154-155812883  | 7.4772   | 6.5076   | -0.2004 | 0.070326 |
| <i>Mir142hg</i>      | chr11:87755576-87757270   | 469.0886 | 399.8588 | -0.2304 | 0.127772 |
| <i>Gm8995</i>        | chr7:106510538-106511671  | 424.2907 | 475.9209 | 0.1657  | 0.209959 |
| <i>Socs7</i>         | chr11:97362550-97398542   | 7.2274   | 6.4075   | -0.1737 | 0.024233 |
| <i>Gm26753</i>       | chr17:21485176-21488875   | 1.0473   | 0.7099   | -0.5610 | 0.074161 |
| <i>Nabp2</i>         | chr10:128401394-128411492 | 8.9751   | 10.8508  | 0.2738  | 0.198957 |
| <i>Cox6c</i>         | chr15:35925885-35938246   | 24.7387  | 28.6029  | 0.2094  | 0.218274 |
| <i>B330016D10Rik</i> | chr4:141546188-141547892  | 7.2326   | 5.9724   | -0.2762 | 0.031178 |
| <i>Mtcp1</i>         | chrX:75404845-75416584    | 10.8590  | 9.0548   | -0.2621 | 0.032283 |
| <i>Gga1</i>          | chr15:78877189-78894585   | 15.1458  | 12.8670  | -0.2352 | 0.139808 |
| <i>Gm15638</i>       | chr16:45945605-45971370   | 2.6326   | 3.1796   | 0.2724  | 0.185951 |
| <i>Gpx4</i>          | chr10:80047165-80056439   | 7.8536   | 9.5193   | 0.2775  | 0.162746 |
| <i>Clint1</i>        | chr11:45852050-45910625   | 36.4240  | 39.4149  | 0.1139  | 0.092871 |
| <i>2810001G20Rik</i> | chr11:64079483-64083259   | 45.5098  | 38.4712  | -0.2424 | 0.124440 |
| <i>Ube2g1</i>        | chr11:72607282-72686481   | 13.0253  | 14.4878  | 0.1535  | 0.085176 |
| <i>Tlcd1</i>         | chr11:78176710-78181909   | 3.7260   | 4.2857   | 0.2019  | 0.100788 |
| <i>Msi2</i>          | chr11:88339381-88718513   | 12.2198  | 13.2831  | 0.1204  | 0.095760 |
| <i>Rpl19</i>         | chr11:98026709-98030492   | 15.8632  | 12.7417  | -0.3161 | 0.132213 |
| <i>Dhx58</i>         | chr11:100694883-100704271 | 8.3384   | 10.4777  | 0.3295  | 0.266469 |
| <i>Kpna2</i>         | chr11:106988628-106999541 | 2.5339   | 3.0980   | 0.2900  | 0.099998 |
| <i>Pgs1</i>          | chr11:117986291-118024011 | 12.6354  | 11.2388  | -0.1690 | 0.045078 |

|                      |                           |          |          |         |          |
|----------------------|---------------------------|----------|----------|---------|----------|
| <i>Slc25a29</i>      | chr12:108825872-108835883 | 2.1288   | 1.6537   | -0.3643 | 0.026103 |
| <i>Hist1h2bg</i>     | chr13:23571395-23572013   | 18.5892  | 22.0323  | 0.2452  | 0.127680 |
| <i>Ccnb1</i>         | chr13:100778649-100786570 | 0.3939   | 0.6084   | 0.6271  | 0.189490 |
| <i>Snx18</i>         | chr13:113592179-113618564 | 12.4103  | 11.0784  | -0.1638 | 0.005527 |
| <i>Ndufs4</i>        | chr13:114287794-114388094 | 28.9600  | 24.2985  | -0.2532 | 0.132988 |
| <i>Abcb1b</i>        | chr5:8798146-8866314      | 8.4247   | 9.6381   | 0.1941  | 0.184093 |
| <i>Stim2</i>         | chr5:53998416-54121057    | 18.0658  | 19.8969  | 0.1393  | 0.179149 |
| <i>Rhoh</i>          | chr5:65863568-65896700    | 42.8766  | 36.6831  | -0.2251 | 0.138269 |
| <i>Hopxos</i>        | chr5:77094531-77102303    | 8.2060   | 9.9408   | 0.2767  | 0.140638 |
| <i>Pitpnb</i>        | chr5:111330762-111388359  | 11.2786  | 9.9184   | -0.1854 | 0.007331 |
| <i>Srsf9</i>         | chr5:115327176-115333080  | 25.6876  | 21.3883  | -0.2643 | 0.101315 |
| <i>Slc12a9</i>       | chr5:137314557-137333597  | 3.6216   | 3.0407   | -0.2522 | 0.073935 |
| <i>Mir704</i>        | chr6:47803575-47803652    | 36.9855  | 22.2119  | -0.7356 | 0.176204 |
| <i>Mad2l1</i>        | chr6:66535389-66541033    | 7.2159   | 8.2820   | 0.1988  | 0.092698 |
| <i>Hnrnp1</i>        | chr7:28808540-28822266    | 65.4243  | 59.4653  | -0.1378 | 0.034792 |
| <i>Uri1</i>          | chr7:37960001-38019542    | 21.5509  | 23.5052  | 0.1252  | 0.076582 |
| <i>Isg20</i>         | chr7:78913423-78920362    | 3.5876   | 4.7202   | 0.3958  | 0.212287 |
| <i>Ticrr</i>         | chr7:79660195-79698134    | 0.4534   | 0.6388   | 0.4944  | 0.207266 |
| <i>Sema4b</i>        | chr7:80186840-80226394    | 9.2145   | 8.1007   | -0.1859 | 0.055425 |
| <i>BC030336</i>      | chr7:120677619-120734854  | 9.4179   | 8.2549   | -0.1901 | 0.039132 |
| <i>Prkcb</i>         | chr7:122288750-122634402  | 46.8412  | 42.3420  | -0.1457 | 0.028298 |
| <i>Arhgap17</i>      | chr7:123279149-123369915  | 3.2946   | 4.0789   | 0.3081  | 0.227833 |
| <i>Saraf</i>         | chr8:34154562-34170845    | 370.5884 | 323.2627 | -0.1971 | 0.102971 |
| <i>Zfp617</i>        | chr8:71908634-71934629    | 6.2678   | 7.2402   | 0.2081  | 0.085014 |
| <i>Slc10a7</i>       | chr8:78509334-78734005    | 10.1138  | 11.3794  | 0.1701  | 0.163180 |
| <i>Ulk3</i>          | chr9:57589451-57596233    | 7.8852   | 6.5458   | -0.2686 | 0.114025 |
| <i>Gm8093</i>        | chr9:78427506-78430805    | 0.3269   | 0.5467   | 0.7420  | 0.044069 |
| <i>Cx3cr1</i>        | chr9:119901615-120068283  | 1.1472   | 2.4372   | 1.0871  | 0.147970 |
| <i>Alas2</i>         | chrX:150547374-150570638  | 0.8787   | 1.3144   | 0.5809  | 0.193735 |
| <i>Fam105a</i>       | chr15:27655070-27681542   | 71.4705  | 63.8054  | -0.1637 | 0.066546 |
| <i>Arhgap39</i>      | chr15:76723984-76818170   | 3.7187   | 4.2630   | 0.1971  | 0.161282 |
| <i>Traj6</i>         | chr14:54212687-54212749   | 113.1638 | 134.9708 | 0.2542  | 0.008641 |
| <i>Trim13</i>        | chr14:61598225-61605946   | 4.7986   | 6.0700   | 0.3391  | 0.215722 |
| <i>Kif13b</i>        | chr14:64652530-64806296   | 11.8331  | 10.5865  | -0.1606 | 0.029996 |
| <i>Mbnl2</i>         | chr14:120275668-120431697 | 26.0825  | 27.9974  | 0.1022  | 0.065548 |
| <i>Vmn2r97</i>       | chr17:18914321-18948071   | 2.4273   | 1.7416   | -0.4789 | 0.154433 |
| <i>Abca3</i>         | chr17:24351949-24410201   | 12.1918  | 10.6209  | -0.1990 | 0.096904 |
| <i>D330041H03Rik</i> | chr17:24404648-24414542   | 14.5136  | 12.5244  | -0.2127 | 0.095495 |
| <i>Mrpl28</i>        | chr17:26123519-26126613   | 24.8327  | 20.6695  | -0.2647 | 0.117864 |
| <i>Axin1</i>         | chr17:26138687-26195811   | 34.4845  | 31.3111  | -0.1393 | 0.009755 |
| <i>Prr3</i>          | chr17:35972540-35980236   | 5.5988   | 4.7450   | -0.2387 | 0.076886 |
| <i>Polh</i>          | chr17:46172003-46202625   | 17.9749  | 15.6838  | -0.1967 | 0.067363 |
| <i>Wdr43</i>         | chr17:71616214-71659031   | 80.3636  | 86.2569  | 0.1021  | 0.046523 |
| <i>Srsf7</i>         | chr17:80200088-80207305   | 84.7549  | 73.9922  | -0.1959 | 0.116811 |
| <i>1810013L24Rik</i> | chr16:8830099-8858916     | 25.6519  | 23.0411  | -0.1549 | 0.035756 |
| <i>Yars2</i>         | chr16:16302964-16309640   | 10.0976  | 8.4657   | -0.2543 | 0.119426 |
| <i>1700056N10Rik</i> | chr16:17047519-17049111   | 6.7051   | 5.0906   | -0.3974 | 0.135558 |
| <i>Rabl3</i>         | chr16:37539884-37572385   | 1.3448   | 1.6070   | 0.2570  | 0.090416 |
| <i>BC021614</i>      | chr19:4057477-4059295     | 47.1571  | 57.3639  | 0.2827  | 0.257349 |
| <i>Snx32</i>         | chr19:5495277-5510489     | 10.2910  | 8.5607   | -0.2656 | 0.075544 |
| <i>Ap5b1</i>         | chr19:5568073-5571261     | 12.6130  | 10.8460  | -0.2177 | 0.090159 |
| <i>Kcnk7</i>         | chr19:5704366-5707101     | 1.1708   | 1.6878   | 0.5276  | 0.009049 |
| <i>Map4k2</i>        | chr19:6341134-6355615     | 74.8128  | 68.5431  | -0.1263 | 0.021480 |
| <i>Sfxn3</i>         | chr19:45047575-45056383   | 13.8839  | 16.0676  | 0.2107  | 0.220908 |
| <i>Sfr1</i>          | chr19:47731755-47735588   | 53.5805  | 62.6990  | 0.2267  | 0.219963 |
| <i>Mrps14</i>        | chr1:160195214-160202170  | 9.7382   | 8.0530   | -0.2741 | 0.142376 |
| <i>Pogk</i>          | chr1:166384621-166409863  | 7.3112   | 9.0004   | 0.2999  | 0.264736 |
| <i>Ptpn14</i>        | chr1:189728267-189876695  | 0.3452   | 0.2536   | -0.4450 | 0.066370 |
| <i>Elac1</i>         | chr18:73735037-73754479   | 3.5016   | 4.0819   | 0.2212  | 0.112307 |
| <i>Ubac1</i>         | chr2:25998542-26021747    | 14.5045  | 12.5787  | -0.2055 | 0.036935 |
| <i>Lnp</i>           | chr2:74520290-74579435    | 4.1473   | 4.6453   | 0.1636  | 0.130308 |
| <i>Gm13999</i>       | chr2:120024806-120027453  | 1.4557   | 0.8859   | -0.7166 | 0.025640 |
| <i>Bub1</i>          | chr2:127801121-127831865  | 1.2624   | 1.7292   | 0.4539  | 0.214728 |
| <i>Rassf2</i>        | chr2:131989414-132030258  | 31.6102  | 28.6717  | -0.1408 | 0.013374 |
| <i>E2f5</i>          | chr3:14578670-14606308    | 13.6803  | 11.6139  | -0.2363 | 0.070114 |
| <i>Ect2</i>          | chr3:27097221-27153878    | 2.0803   | 2.5579   | 0.2981  | 0.218304 |
| <i>Golim4</i>        | chr3:75876182-75956949    | 4.0256   | 4.5781   | 0.1856  | 0.161142 |
| <i>Gm25820</i>       | chr3:88693930-88694057    | 18.4687  | 12.3299  | -0.5829 | 0.046687 |
| <i>Sike1</i>         | chr3:102995727-103003914  | 29.5734  | 26.7914  | -0.1425 | 0.008430 |
| <i>Ppp3ca</i>        | chr3:136670123-136937727  | 17.7434  | 19.6372  | 0.1463  | 0.113904 |
| <i>Ripk2</i>         | chr4:16122732-16163647    | 10.1405  | 11.4485  | 0.1750  | 0.141668 |

|                      |                           |         |         |         |          |
|----------------------|---------------------------|---------|---------|---------|----------|
| <i>Ddx58</i>         | chr4:40203772-40239828    | 38.4689 | 42.5318 | 0.1448  | 0.177948 |
| <i>Pigo</i>          | chr4:43017634-43025819    | 8.4757  | 7.3015  | -0.2151 | 0.096436 |
| <i>Inadl</i>         | chr4:98395784-98719603    | 10.7982 | 9.6379  | -0.1640 | 0.057329 |
| <i>Sfpq</i>          | chr4:127021323-127037013  | 92.7458 | 82.9783 | -0.1605 | 0.064399 |
| <i>Gm12966</i>       | chr4:129899092-129899902  | 17.0679 | 21.3403 | 0.3223  | 0.206987 |
| <i>Atp1f1</i>        | chr4:132530554-132533659  | 15.6017 | 19.1727 | 0.2974  | 0.209077 |
| <i>Sfn</i>           | chr4:133600555-133602168  | 12.4878 | 10.5726 | -0.2402 | 0.071683 |
| <i>Zbtb40</i>        | chr4:136979731-137048801  | 5.3275  | 4.7216  | -0.1742 | 0.031640 |
| <i>Ddi2</i>          | chr4:141677548-141723419  | 17.6152 | 15.7730 | -0.1594 | 0.061588 |
| <i>Lzic</i>          | chr4:149485228-149496668  | 11.6111 | 9.6680  | -0.2642 | 0.083249 |
| <i>Klrg1</i>         | chr6:122270595-122282882  | 0.6861  | 1.2877  | 0.9083  | 0.168262 |
| <i>Gm21814</i>       | chr6:149582011-149583656  | 3.3951  | 1.5060  | -1.1728 | 0.095797 |
| <i>Zfp607</i>        | chr7:27862556-27879567    | 17.4257 | 15.3372 | -0.1842 | 0.013529 |
| <i>Dnajc18</i>       | chr18:35671102-35703144   | 7.9201  | 7.0311  | -0.1718 | 0.004746 |
| <i>Slc25a11</i>      | chr11:70644195-70647479   | 45.1487 | 39.3909 | -0.1968 | 0.099520 |
| <i>Aars</i>          | chr8:111033143-111057664  | 12.5162 | 13.5697 | 0.1166  | 0.071840 |
| <i>Pcbp3</i>         | chr10:76761856-76961887   | 0.4497  | 0.6722  | 0.5800  | 0.108725 |
| <i>Ublcp1</i>        | chr11:44454570-44470498   | 6.0514  | 6.9208  | 0.1937  | 0.058573 |
| <i>Arl4a</i>         | chr12:40005446-40038025   | 4.4422  | 5.0784  | 0.1931  | 0.176796 |
| <i>Gm15326</i>       | chr13:111867935-111874730 | 1.4623  | 2.0909  | 0.5159  | 0.132228 |
| <i>Nfu1</i>          | chr6:87009235-87028461    | 13.8679 | 15.7195 | 0.1808  | 0.148594 |
| <i>Gm26909</i>       | chr8:22644860-22646286    | 3.6012  | 2.4640  | -0.5475 | 0.009592 |
| <i>Gm22988</i>       | chr11:69669634-69669778   | 45.7945 | 32.4919 | -0.4951 | 0.160118 |
| <i>Mttr7</i>         | chr8:40551094-40634797    | 3.1496  | 2.5203  | -0.3216 | 0.128789 |
| <i>Ube2n</i>         | chr10:95515161-95545658   | 4.3788  | 3.7424  | -0.2265 | 0.014060 |
| <i>Gm12178</i>       | chr11:48289983-48290313   | 1.7861  | 3.1687  | 0.8271  | 0.062458 |
| <i>Mrpl22</i>        | chr11:58171660-58179565   | 10.7398 | 12.6141 | 0.2321  | 0.055392 |
| <i>Gm12258</i>       | chr11:58847157-58861956   | 12.1131 | 9.9958  | -0.2772 | 0.167573 |
| <i>Stra13</i>        | chr11:120710941-120713738 | 13.5162 | 16.2987 | 0.2701  | 0.185640 |
| <i>4933426M11Rik</i> | chr12:80790531-80880832   | 27.8305 | 24.9256 | -0.1590 | 0.055396 |
| <i>Entpd5</i>        | chr12:84373856-84409029   | 28.1942 | 25.6593 | -0.1359 | 0.008177 |
| <i>Zscan12</i>       | chr13:21362826-21369824   | 10.6830 | 11.8156 | 0.1454  | 0.002427 |
| <i>Gm6517</i>        | chr5:66890363-66890884    | 7.9090  | 11.1263 | 0.4924  | 0.213498 |
| <i>Clec2i</i>        | chr6:128887587-128898167  | 44.0577 | 37.0704 | -0.2491 | 0.173650 |
| <i>Amn1</i>          | chr6:149157146-149188712  | 4.6774  | 3.9411  | -0.2471 | 0.063390 |
| <i>Chst15</i>        | chr7:132235779-132317228  | 8.2604  | 7.2116  | -0.1959 | 0.048573 |
| <i>Irf2</i>          | chr8:46739744-46847458    | 10.4089 | 11.9235 | 0.1960  | 0.183997 |
| <i>Arhgap10</i>      | chr8:77250365-77517907    | 6.6435  | 7.5848  | 0.1912  | 0.106373 |
| <i>Bace1</i>         | chr9:45838579-45864399    | 10.4654 | 9.3060  | -0.1694 | 0.047266 |
| <i>Zfp445</i>        | chr9:122851913-122862128  | 46.1077 | 40.6194 | -0.1828 | 0.090895 |
| <i>Trio</i>          | chr15:27730651-28025848   | 2.9241  | 3.4707  | 0.2472  | 0.240078 |
| <i>Ccser2</i>        | chr14:36874935-36968777   | 15.1705 | 16.5523 | 0.1258  | 0.130680 |
| <i>Gzmb</i>          | chr14:56258855-56262260   | 9.2158  | 19.1322 | 1.0538  | 0.137483 |
| <i>N6amt2</i>        | chr14:57549597-57571569   | 25.1825 | 20.9959 | -0.2623 | 0.098188 |
| <i>Nme3</i>          | chr17:24896499-24897522   | 19.6858 | 16.5498 | -0.2503 | 0.053921 |
| <i>Mkl2</i>          | chr16:13256480-13417529   | 3.1102  | 3.6964  | 0.2491  | 0.260944 |
| <i>Gabpa</i>         | chr16:84834924-84863779   | 24.1560 | 25.9629 | 0.1041  | 0.038047 |
| <i>Ndufs8</i>        | chr19:3908869-3912717     | 43.4421 | 50.2756 | 0.2108  | 0.205701 |
| <i>Csrp1</i>         | chr1:135720060-135752232  | 38.7192 | 44.1068 | 0.1880  | 0.200869 |
| <i>Hcn3</i>          | chr3:89146073-89160196    | 2.3896  | 1.8762  | -0.3490 | 0.128792 |
| <i>Gm12655</i>       | chr4:94460930-94477180    | 3.5155  | 2.0302  | -0.7921 | 0.269105 |
| <i>Gm12657</i>       | chr4:94593649-94600310    | 2.1377  | 1.2391  | -0.7867 | 0.160316 |
| <i>Rcc1</i>          | chr4:132331918-132353605  | 7.3005  | 6.4235  | -0.1846 | 0.004079 |
| <i>Cd247</i>         | chr1:165788680-165877276  | 87.9741 | 96.3758 | 0.1316  | 0.157030 |
| <i>Terf2ip</i>       | chr8:112011358-112020528  | 10.6827 | 9.3464  | -0.1928 | 0.046473 |
| <i>Mapk14</i>        | chr17:28691341-28748404   | 28.6108 | 26.0291 | -0.1364 | 0.015329 |
| <i>Max</i>           | chr12:76937268-76962248   | 44.9892 | 49.9652 | 0.1513  | 0.134347 |
| <i>Rsbn1l</i>        | chr5:20893027-20951822    | 20.3312 | 22.1241 | 0.1219  | 0.113299 |
| <i>B3gnt8</i>        | chr7:25627623-25629490    | 0.3540  | 0.6448  | 0.8652  | 0.047100 |
| <i>Gm16793</i>       | chr8:35582571-35588972    | 2.0270  | 2.6361  | 0.3791  | 0.058463 |
| <i>Gm8822</i>        | chrX:81820383-81822730    | 3.7353  | 4.4463  | 0.2514  | 0.100705 |
| <i>Chm</i>           | chrX:113040594-113185517  | 15.5405 | 17.4484 | 0.1671  | 0.155346 |
| <i>Lrp12</i>         | chr15:39870602-39943994   | 3.2410  | 2.7016  | -0.2626 | 0.065970 |
| <i>Mcat</i>          | chr15:83546796-83555711   | 9.3036  | 7.8909  | -0.2376 | 0.033555 |
| <i>Zfp54</i>         | chr17:21423226-21435640   | 6.8968  | 5.7343  | -0.2663 | 0.095690 |
| <i>Lipt1</i>         | chr1:37871737-37877387    | 4.2973  | 5.0053  | 0.2200  | 0.122156 |
| <i>E230008N13Rik</i> | chr4:45890302-45950774    | 0.2905  | 0.4221  | 0.5392  | 0.079782 |
| <i>Hist1h2bn</i>     | chr13:21754122-21754503   | 2.4746  | 3.8572  | 0.6403  | 0.031130 |
| <i>Gm26920</i>       | chr7:30056033-30090410    | 10.4794 | 9.0943  | -0.2045 | 0.021529 |
| <i>Zfp709</i>        | chr8:71887263-71890912    | 10.0066 | 8.4392  | -0.2458 | 0.082995 |
| <i>Cyc1</i>          | chr15:76343522-76345934   | 42.2852 | 37.2750 | -0.1819 | 0.057002 |

|                      |                           |           |           |         |          |
|----------------------|---------------------------|-----------|-----------|---------|----------|
| <i>Dad1</i>          | chr14:54235478-54254104   | 18.0801   | 20.5332   | 0.1836  | 0.204734 |
| <i>Kpna2-ps</i>      | chr17:47620770-47622339   | 14.1146   | 11.2931   | -0.3217 | 0.180961 |
| <i>Cd200</i>         | chr16:45382134-45409053   | 2.4534    | 3.0027    | 0.2915  | 0.164380 |
| <i>Ltbp3</i>         | chr19:5740903-5758532     | 0.9963    | 1.2271    | 0.3005  | 0.041660 |
| <i>4930505N22Rik</i> | chr19:45998136-46013386   | 0.7008    | 1.2398    | 0.8231  | 0.073249 |
| <i>Prpf18</i>        | chr2:4622057-4652113      | 21.3658   | 19.0676   | -0.1642 | 0.049547 |
| <i>Sfmbt2</i>        | chr2:10370509-10595253    | 3.0998    | 2.5348    | -0.2903 | 0.212550 |
| <i>Vps16</i>         | chr2:130424338-130444269  | 42.5283   | 38.7419   | -0.1345 | 0.018131 |
| <i>Nxt1</i>          | chr2:148672600-148676027  | 14.8656   | 12.4041   | -0.2612 | 0.071170 |
| <i>Gm23686</i>       | chr3:18177461-18177625    | 9.2106    | 13.9935   | 0.6034  | 0.178472 |
| <i>Dap3</i>          | chr3:88920802-88951181    | 10.9440   | 9.7213    | -0.1709 | 0.038119 |
| <i>Cks1b</i>         | chr3:89415471-89418383    | 3.5659    | 4.6181    | 0.3730  | 0.122717 |
| <i>Gm20503</i>       | chr4:59003209-59041888    | 28.7706   | 24.0266   | -0.2600 | 0.119078 |
| <i>Sept10</i>        | chr10:59164112-59221847   | 0.1833    | 0.3779    | 1.0442  | 0.179690 |
| <i>Pmvk</i>          | chr3:89459117-89469013    | 11.8908   | 9.9510    | -0.2569 | 0.047355 |
| <i>Gm26648</i>       | chr5:24696901-24704690    | 16.0085   | 17.2087   | 0.1043  | 0.022898 |
| <i>Cfdp1</i>         | chr8:111768472-111854310  | 52.7087   | 61.9834   | 0.2338  | 0.214951 |
| <i>Msrb1</i>         | chr17:24736641-24742778   | 17.2967   | 19.9526   | 0.2061  | 0.143988 |
| <i>Cdyl</i>          | chr13:35659861-35874064   | 7.5534    | 8.3957    | 0.1525  | 0.056975 |
| <i>Pold2</i>         | chr11:5872179-5878292     | 19.7192   | 22.4026   | 0.1841  | 0.161298 |
| <i>Gm12230</i>       | chr11:54947434-54947888   | 3.9396    | 2.5898    | -0.6052 | 0.013496 |
| <i>Slc39a11</i>      | chr11:113244852-113650079 | 7.2860    | 6.0839    | -0.2601 | 0.108961 |
| <i>2310002F09Rik</i> | chr7:43695208-43797945    | 0.4621    | 0.7909    | 0.7752  | 0.129291 |
| <i>4931415C17Rik</i> | chr8:12672185-12679229    | 0.6922    | 0.4699    | -0.5588 | 0.004695 |
| <i>Ddx3x</i>         | chrX:13280969-13294052    | 100.3917  | 109.4969  | 0.1253  | 0.120888 |
| <i>Homez</i>         | chr14:54852735-54870961   | 2.6815    | 3.0675    | 0.1940  | 0.064168 |
| <i>Tnfrsf10b</i>     | chr14:69767471-69784403   | 1.2422    | 1.5793    | 0.3464  | 0.078878 |
| <i>Fam45a</i>        | chr19:60811584-60836227   | 5.4918    | 6.1667    | 0.1672  | 0.117423 |
| <i>1110058L19Rik</i> | chr1:23995938-24005656    | 7.1559    | 5.1717    | -0.4685 | 0.187631 |
| <i>Gm13708</i>       | chr2:73459704-73477602    | 8.0923    | 5.4353    | -0.5742 | 0.150454 |
| <i>Cwc22</i>         | chr2:77881158-77946375    | 8.8412    | 9.8150    | 0.1508  | 0.153573 |
| <i>Snapi1</i>        | chr3:90488025-90491033    | 29.1757   | 31.7153   | 0.1204  | 0.073908 |
| <i>Cpsf4l</i>        | chr11:113698171-113710017 | 1.1015    | 0.7525    | -0.5496 | 0.046114 |
| <i>Jag2</i>          | chr12:112908589-112929495 | 0.8898    | 0.6500    | -0.4531 | 0.064945 |
| <i>A1987944</i>      | chr7:41373771-41393260    | 18.8477   | 21.2832   | 0.1753  | 0.120235 |
| <i>Itgad</i>         | chr7:128154375-128223816  | 0.7610    | 1.1406    | 0.5839  | 0.302434 |
| <i>Itgb1</i>         | chr8:128685653-128733200  | 52.1659   | 59.9018   | 0.1995  | 0.283909 |
| <i>Emd</i>           | chrX:74254686-74261548    | 16.7657   | 19.1401   | 0.1911  | 0.188949 |
| <i>Fam110a</i>       | chr2:151969397-151980219  | 1.9840    | 1.5172    | -0.3870 | 0.011534 |
| <i>Plaa</i>          | chr4:94567513-94603244    | 22.9978   | 24.8442   | 0.1114  | 0.061305 |
| <i>Gnb1</i>          | chr4:155491360-155559269  | 30.3479   | 27.4322   | -0.1457 | 0.024232 |
| <i>Zfp418</i>        | chr7:7171329-7183562      | 3.1642    | 2.5767    | -0.2963 | 0.029557 |
| <i>Dazap2</i>        | chr15:100615627-100620731 | 71.4058   | 81.3099   | 0.1874  | 0.192828 |
| <i>Klra1</i>         | chr6:130363917-130386874  | 0.5607    | 0.9369    | 0.7405  | 0.125448 |
| <i>A630052C17Rik</i> | chr11:29170908-29173558   | 11.4157   | 9.7306    | -0.2304 | 0.073777 |
| <i>Gimap5</i>        | chr6:48746196-48754210    | 47.2679   | 41.6138   | -0.1838 | 0.090750 |
| <i>Ppm1k</i>         | chr6:57506501-57535426    | 13.6577   | 11.9114   | -0.1974 | 0.095777 |
| <i>BC024978</i>      | chr7:27195780-27205386    | 2.0114    | 2.4725    | 0.2978  | 0.075000 |
| <i>4933406J10Rik</i> | chr7:82743367-82755644    | 0.8008    | 1.3590    | 0.7630  | 0.136605 |
| <i>Urb2</i>          | chr8:124021507-124048505  | 11.0077   | 9.8215    | -0.1645 | 0.050594 |
| <i>Gmfb</i>          | chr14:46808148-46822242   | 57.8160   | 51.0477   | -0.1796 | 0.104193 |
| <i>Gm16305</i>       | chr1:138991549-138992021  | 2.2077    | 1.2476    | -0.8234 | 0.022364 |
| <i>Fam129b</i>       | chr2:32876113-32925254    | 0.2727    | 0.4300    | 0.6569  | 0.171884 |
| <i>Kif18a</i>        | chr2:109280737-109341747  | 1.3792    | 1.6522    | 0.2606  | 0.227968 |
| <i>Gnl2</i>          | chr4:125016584-125055380  | 26.5590   | 29.1732   | 0.1354  | 0.130819 |
| <i>Trnp1</i>         | chr4:133491099-133498550  | 0.8534    | 0.4568    | -0.9015 | 0.226896 |
| <i>Phactr2</i>       | chr10:13207716-13474396   | 0.3596    | 0.4844    | 0.4299  | 0.181326 |
| <i>Gm15892</i>       | chr11:88059065-88067476   | 0.3412    | 0.7205    | 1.0782  | 0.177671 |
| <i>Dnajc7</i>        | chr11:100582817-100620168 | 54.7229   | 49.4568   | -0.1460 | 0.024630 |
| <i>Gm15492</i>       | chr6:113308665-113326747  | 7.4150    | 5.5083    | -0.4288 | 0.084481 |
| <i>Rplp1</i>         | chr9:61913283-61914538    | 2963.5895 | 3576.6920 | 0.2713  | 0.255623 |
| <i>Smug1</i>         | chr15:103153306-103158002 | 8.0250    | 6.8065    | -0.2376 | 0.103680 |
| <i>Myo3b</i>         | chr2:70039125-70429198    | 0.7272    | 0.9728    | 0.4198  | 0.195596 |
| <i>Ampd2</i>         | chr3:108074061-108086651  | 8.8157    | 7.6531    | -0.2040 | 0.104764 |
| <i>Gm21781</i>       | chr10:4391586-4396424     | 11.5930   | 9.7417    | -0.2510 | 0.149037 |
| <i>Txnrd2</i>        | chr16:18426416-18479073   | 2.8693    | 2.3411    | -0.2935 | 0.055043 |
| <i>H2-T24</i>        | chr17:36005694-36020560   | 42.2331   | 50.4510   | 0.2565  | 0.281971 |
| <i>Mkrr1</i>         | chr6:39397803-39420462    | 22.9533   | 20.7441   | -0.1460 | 0.019857 |
| <i>Cxcr3</i>         | chrX:101731534-101734269  | 38.5362   | 47.0465   | 0.2879  | 0.273050 |
| <i>Ezr</i>           | chr17:6738040-6782784     | 182.7745  | 203.0779  | 0.1520  | 0.205780 |
| <i>Ndufb2</i>        | chr6:39592573-39603382    | 6.0528    | 5.1905    | -0.2217 | 0.082243 |

|                      |                           |          |          |         |          |
|----------------------|---------------------------|----------|----------|---------|----------|
| <i>Ngly1</i>         | chr14:16249279-16311926   | 21.2717  | 22.6654  | 0.0916  | 0.013950 |
| <i>Gtpbp2</i>        | chr17:46161031-46169370   | 29.0131  | 26.0735  | -0.1541 | 0.052935 |
| <i>Spred2</i>        | chr11:19924374-20024026   | 3.0165   | 3.5902   | 0.2512  | 0.155421 |
| <i>Chtop</i>         | chr3:90498955-90509498    | 67.2344  | 60.2377  | -0.1585 | 0.049312 |
| <i>Ube2d3</i>        | chr3:135438296-135467178  | 102.5777 | 117.0208 | 0.1900  | 0.204431 |
| <i>Acpt</i>          | chr7:44252147-44257378    | 4.4588   | 3.5219   | -0.3403 | 0.094798 |
| <i>Gm22247</i>       | chr4:46495154-46495285    | 5.0467   | 8.6780   | 0.7820  | 0.131340 |
| <i>Ttc28</i>         | chr5:110879802-111289780  | 0.8231   | 1.0205   | 0.3102  | 0.225984 |
| <i>Snord34</i>       | chr7:45126600-45126670    | 68.7698  | 84.1207  | 0.2907  | 0.021964 |
| <i>Gm17227</i>       | chr19:7297657-7304528     | 1.1225   | 0.6316   | -0.8295 | 0.053257 |
| <i>Sv2a</i>          | chr3:96181150-96195521    | 2.4289   | 2.0240   | -0.2631 | 0.018272 |
| <i>Mir5114</i>       | chr19:44303170-44303231   | 22.3952  | 13.3022  | -0.7515 | 0.060052 |
| <i>Pigw</i>          | chr11:84876314-84880285   | 5.0584   | 4.2407   | -0.2544 | 0.051735 |
| <i>Ptprcap</i>       | chr19:4154605-4156751     | 307.1032 | 344.9426 | 0.1676  | 0.213081 |
| <i>Mpp7</i>          | chr18:7347961-7626863     | 3.2726   | 3.8000   | 0.2156  | 0.162224 |
| <i>Atp13a1</i>       | chr8:69791162-69807749    | 42.9275  | 38.8945  | -0.1423 | 0.057063 |
| <i>Ly6e</i>          | chr15:74955050-74959905   | 130.4929 | 144.8188 | 0.1503  | 0.197229 |
| <i>Mat2a</i>         | chr6:72432798-72439558    | 78.1738  | 69.2524  | -0.1748 | 0.093863 |
| <i>Tlr7</i>          | chrX:167304928-167330558  | 5.3134   | 5.1434   | 0.6344  | 0.156426 |
| <i>Epc2</i>          | chr2:49451485-49551948    | 28.6168  | 31.0394  | 0.1172  | 0.076734 |
| <i>Vash2</i>         | chr1:190947647-190979296  | 0.4552   | 0.6423   | 0.4969  | 0.139157 |
| <i>Fam169a</i>       | chr13:97067286-97129521   | 1.1675   | 1.4695   | 0.3320  | 0.118102 |
| <i>Gm5901</i>        | chr7:105375097-105378287  | 2.1748   | 1.4495   | -0.5853 | 0.072023 |
| <i>Dpy19l1</i>       | chr9:24411775-24503140    | 22.8734  | 20.3114  | -0.1714 | 0.088707 |
| <i>Gucy1b3</i>       | chr3:82032003-82074711    | 0.2442   | 0.4859   | 0.9923  | 0.291237 |
| <i>A330017A19Rik</i> | chr17:46889215-46890405   | 0.9409   | 1.4579   | 0.6319  | 0.080703 |
| <i>Grk6</i>          | chr13:55445333-55460925   | 193.7173 | 175.7788 | -0.1402 | 0.066283 |
| <i>Vdac3</i>         | chr8:22577074-22593813    | 11.0734  | 9.1055   | -0.2823 | 0.115123 |
| <i>Gm24888</i>       | chr7:109521279-109521409  | 16.5764  | 10.1701  | -0.7048 | 0.182660 |
| <i>Srbd1</i>         | chr17:85984664-86145175   | 13.1616  | 14.3849  | 0.1282  | 0.084573 |
| <i>Ccndbp1</i>       | chr2:121008402-121016904  | 21.0239  | 22.7955  | 0.1167  | 0.071564 |
| <i>Ktn1</i>          | chr14:47663755-47736563   | 21.4653  | 23.4184  | 0.1256  | 0.175585 |
| <i>Klf20b</i>        | chr19:34922357-34975731   | 8.4029   | 9.2828   | 0.1437  | 0.129334 |
| <i>Snord45b</i>      | chr3:153910562-153910633  | 15.6634  | 8.5365   | -0.8757 | 0.124419 |
| <i>Slc39a3</i>       | chr10:81028537-81037426   | 6.5280   | 6.5980   | -0.1962 | 0.027370 |
| <i>Dhrs7b</i>        | chr11:60830630-60860195   | 5.7067   | 4.8927   | -0.2220 | 0.034210 |
| <i>Gpr19</i>         | chr6:134869092-134897925  | 2.6612   | 3.1830   | 0.2583  | 0.068048 |
| <i>Prc1</i>          | chr7:80294449-80316259    | 2.2501   | 2.8750   | 0.3536  | 0.319667 |
| <i>Fanca</i>         | chr8:123268299-123318576  | 1.7935   | 1.5087   | -0.2496 | 0.079314 |
| <i>Ttc9c</i>         | chr19:8809074-8819333     | 16.1060  | 14.0175  | -0.2004 | 0.098060 |
| <i>Gzmm</i>          | chr10:79689019-79695261   | 5.6635   | 7.3704   | 0.3801  | 0.237300 |
| <i>Gm16239</i>       | chr10:99179183-99184610   | 0.3938   | 0.6474   | 0.7172  | 0.208523 |
| <i>Gm12195</i>       | chr11:50134081-50135004   | 3.6988   | 5.4078   | 0.5480  | 0.108659 |
| <i>Cyb5d1</i>        | chr11:69391924-69395631   | 4.8032   | 5.9237   | 0.3025  | 0.126165 |
| <i>Ywhae</i>         | chr11:75732868-75765845   | 33.5922  | 37.7495  | 0.1683  | 0.197297 |
| <i>Map3k3</i>        | chr11:106084612-106155446 | 56.3552  | 51.2590  | -0.1367 | 0.025687 |
| <i>Polr1d</i>        | chr5:147077049-147111361  | 30.3524  | 25.3642  | -0.2590 | 0.174870 |
| <i>Gm26811</i>       | chr6:89304629-89327621    | 0.1980   | 0.1170   | -0.7591 | 0.010054 |
| <i>Kras</i>          | chr6:145216698-145250239  | 23.1956  | 25.3002  | 0.1253  | 0.148608 |
| <i>Gm15673</i>       | chr7:101238340-101239278  | 2.5381   | 1.6978   | -0.5801 | 0.117554 |
| <i>Trim3</i>         | chr7:105604462-105633571  | 0.9938   | 1.3028   | 0.3906  | 0.181719 |
| <i>Dbnnd1</i>        | chr8:123504717-123515463  | 1.1762   | 0.8307   | -0.5018 | 0.119397 |
| <i>Rprd1a</i>        | chr18:24484961-24530204   | 3.8701   | 3.2840   | -0.2369 | 0.050260 |
| <i>Lrif1</i>         | chr3:106684986-106736577  | 12.3516  | 14.0530  | 0.1862  | 0.252384 |
| <i>Zfp459</i>        | chr13:67405721-67421418   | 3.8554   | 3.2574   | -0.2431 | 0.009783 |
| <i>Ogfod2</i>        | chr5:124112296-124115483  | 8.4147   | 7.1333   | -0.2384 | 0.068374 |
| <i>Zfp949</i>        | chr9:88548019-88571086    | 9.0272   | 7.9092   | -0.1908 | 0.046282 |
| <i>Ahnak</i>         | chr19:8989283-9076919     | 78.7209  | 89.5708  | 0.1863  | 0.291999 |
| <i>Tstd3</i>         | chr4:21757381-21767212    | 7.2663   | 8.8963   | 0.2920  | 0.229438 |
| <i>Gm11478</i>       | chr11:86630427-86631026   | 25.3766  | 19.8491  | -0.3544 | 0.172935 |
| <i>Gm26887</i>       | chr8:84192773-84197667    | 0.9263   | 1.6788   | 0.8578  | 0.033562 |
| <i>Cdon</i>          | chr9:35421127-35507651    | 9.2680   | 8.1698   | -0.1820 | 0.089757 |
| <i>Nlrp1b</i>        | chr11:71153101-71230733   | 0.5994   | 0.7561   | 0.3351  | 0.063884 |
| <i>Dcun1d4</i>       | chr5:73481001-73560794    | 1.5762   | 1.8324   | 0.2173  | 0.021312 |
| <i>Cnih4</i>         | chr1:181150930-181168994  | 4.3065   | 4.9387   | 0.1976  | 0.119645 |
| <i>Gsn</i>           | chr2:35279662-35307892    | 17.1865  | 14.4504  | -0.2502 | 0.171006 |
| <i>Vps11</i>         | chr9:44348105-44361670    | 25.6672  | 23.1060  | -0.1517 | 0.037876 |
| <i>Utp18</i>         | chr11:93859242-93885766   | 28.4043  | 25.6097  | -0.1494 | 0.020163 |
| <i>Serbp1</i>        | chr6:67266978-67289302    | 104.9254 | 118.8850 | 0.1802  | 0.228187 |
| <i>Zfp868</i>        | chr8:69610856-69625548    | 8.2910   | 9.3382   | 0.1716  | 0.111172 |
| <i>Mdh1</i>          | chr11:21556786-21572367   | 61.1789  | 53.0339  | -0.2061 | 0.132877 |

|               |                           |          |          |         |          |
|---------------|---------------------------|----------|----------|---------|----------|
| Zbtb2         | chr10:4367073-4388108     | 13.3992  | 15.4233  | 0.2030  | 0.209471 |
| Tap2          | chr17:34203526-34216321   | 58.1502  | 51.5334  | -0.1743 | 0.123926 |
| Efcab8        | chr2:153780878-153844752  | 0.1726   | 0.2770   | 0.6820  | 0.027294 |
| Dynlt1c       | chr17:6601670-6609774     | 0.4171   | 0.2583   | -0.6909 | 0.093673 |
| Gm15956       | chr18:12193767-12198675   | 6.7595   | 8.9762   | 0.4092  | 0.118883 |
| Arhgap26      | chr18:38601533-39376284   | 3.2829   | 3.7251   | 0.1823  | 0.249975 |
| Hivep1        | chr13:42052020-42185026   | 6.2900   | 7.2150   | 0.1979  | 0.276509 |
| Tomm20        | chr8:126930663-126945921  | 11.4994  | 12.5505  | 0.1262  | 0.103631 |
| Slc22a17      | chr14:54906726-54913132   | 0.3940   | 0.6424   | 0.7055  | 0.117656 |
| Phgdh         | chr3:98313169-98339990    | 7.6312   | 6.5030   | -0.2308 | 0.067742 |
| Ndufb6        | chr4:40270590-40279421    | 31.1846  | 25.6426  | -0.2823 | 0.138078 |
| Gdf1          | chr8:70315774-70331592    | 0.9338   | 0.6294   | -0.5691 | 0.104721 |
| Gtdc1         | chr2:44564411-44927657    | 2.8268   | 3.2240   | 0.1897  | 0.196106 |
| B230219D22Rik | chr13:55693123-55703499   | 39.1849  | 35.3676  | -0.1479 | 0.063115 |
| Vopp1         | chr6:57727806-57825154    | 5.8475   | 6.3061   | 0.1089  | 0.016812 |
| NA            | chr1:160044583-160071509  | 89.1891  | 100.3963 | 0.1708  | 0.147128 |
| Cited2        | chr10:17723227-17725673   | 5.4042   | 6.9469   | 0.3623  | 0.288333 |
| Eif2ak3       | chr6:70844514-70905245    | 10.2875  | 9.2315   | -0.1563 | 0.015261 |
| Zfp667        | chr7:6286578-6307883      | 2.6077   | 2.1165   | -0.3010 | 0.103666 |
| L1cam         | chrX:73853777-73896105    | 3.5151   | 3.0370   | -0.2109 | 0.076910 |
| Zfp597        | chr16:3858320-3884561     | 11.2666  | 9.8005   | -0.2011 | 0.126023 |
| Tns1          | chr1:73910230-74124447    | 1.6079   | 1.3397   | -0.2633 | 0.113644 |
| Fubp3         | chr2:31572650-31617526    | 7.3405   | 8.1893   | 0.1579  | 0.115444 |
| Caprin1       | chr2:103762940-103797649  | 44.9795  | 48.2907  | 0.1025  | 0.074392 |
| Atp10a        | chr7:58658201-58829426    | 15.6257  | 17.2658  | 0.1440  | 0.195076 |
| Dpf2          | chr19:5896515-5913010     | 9.3986   | 8.4348   | -0.1561 | 0.038774 |
| Slc12a2       | chr18:57878677-57946821   | 2.4706   | 2.8911   | 0.2268  | 0.200761 |
| Akirin2       | chr4:34550936-34566908    | 30.2989  | 26.6153  | -0.1870 | 0.079133 |
| Gm14026       | chr2:129168699-129170488  | 1.3215   | 1.9010   | 0.5246  | 0.204789 |
| Lpin1         | chr12:16535668-16589770   | 14.3514  | 16.1318  | 0.1687  | 0.254113 |
| Gm24265       | chr5:115489458-115489599  | 454.5324 | 269.7317 | -0.7529 | 0.170578 |
| Apobr         | chr7:126584941-126589112  | 4.6743   | 5.6814   | 0.2815  | 0.196040 |
| Nod2          | chr8:88647314-88688474    | 0.6220   | 0.8483   | 0.4476  | 0.231498 |
| 1810049J17Rik | chr15:12321437-12321899   | 49.5321  | 62.4889  | 0.3352  | 0.293130 |
| Rab11fip3     | chr17:25989035-26069409   | 2.5286   | 2.1471   | -0.2360 | 0.076601 |
| Cspp1         | chr1:10038217-10136768    | 6.8234   | 7.5817   | 0.1520  | 0.148507 |
| Pik3c2b       | chr1:133045666-133108687  | 0.3946   | 0.2994   | -0.3981 | 0.000925 |
| Bbs12         | chr3:37312553-37321453    | 3.7686   | 3.0757   | -0.2931 | 0.043981 |
| NA            | chr3:84965055-84965580    | 7.1204   | 5.3068   | -0.4241 | 0.043468 |
| Mylip         | chr13:45389741-45412019   | 36.2667  | 39.2961  | 0.1157  | 0.143918 |
| Hmgxb3        | chr18:61131278-61177050   | 19.0753  | 17.1537  | -0.1532 | 0.067286 |
| Dgcr2         | chr16:17839481-17894145   | 18.1894  | 16.0820  | -0.1777 | 0.118364 |
| B630005N14Rik | chr6:13625676-13677966    | 19.8491  | 16.8062  | -0.2401 | 0.209897 |
| Scarf1        | chr11:75513539-75526582   | 1.0697   | 0.7556   | -0.5015 | 0.085198 |
| Gclc          | chr9:77754534-77794485    | 23.6138  | 25.8397  | 0.1300  | 0.150124 |
| Herc2         | chr7:56050154-56231794    | 41.2341  | 37.3209  | -0.1439 | 0.071506 |
| Gm26566       | chr4:88721804-88722842    | 19.6847  | 16.1330  | -0.2871 | 0.136167 |
| Pdlim7        | chr13:55495794-55513676   | 0.8567   | 1.0875   | 0.3440  | 0.092910 |
| Fam96a        | chr9:66126610-66138955    | 34.8259  | 40.5522  | 0.2196  | 0.214397 |
| Naa16         | chr14:79334203-79390778   | 6.7580   | 7.5324   | 0.1565  | 0.140862 |
| Ddb1          | chr19:10605624-10629813   | 88.3651  | 80.2664  | -0.1387 | 0.029708 |
| Chrn2         | chr3:89753447-89764632    | 1.9646   | 2.2970   | 0.2256  | 0.111432 |
| Mir1902       | chr2:104428860-104428940  | 16.7558  | 10.5613  | -0.6659 | 0.006850 |
| Gm26602       | chr10:79910855-79911140   | 41.0843  | 50.5147  | 0.2981  | 0.216427 |
| Rest          | chr5:77265490-77286432    | 19.1220  | 17.4284  | -0.1338 | 0.009523 |
| Slc41a3       | chr6:90604724-90646412    | 0.8995   | 1.2138   | 0.4323  | 0.117217 |
| Skiv2l        | chr17:34839227-34850210   | 29.3952  | 26.4428  | -0.1527 | 0.074182 |
| Klhdc3        | chr17:46674549-46680930   | 18.4007  | 15.4491  | -0.2522 | 0.186256 |
| Setd4         | chr16:93583456-93604063   | 5.2610   | 4.4980   | -0.2260 | 0.102239 |
| Polr2a        | chr19:5940542-5964206     | 18.1101  | 19.7836  | 0.1275  | 0.102481 |
| Bbs7          | chr3:36573141-36613477    | 0.3600   | 0.5265   | 0.5487  | 0.115975 |
| Manba         | chr3:135485610-135571404  | 6.0457   | 5.2795   | -0.1955 | 0.087220 |
| Nol9          | chr4:152039320-152061494  | 18.9361  | 16.9501  | -0.1598 | 0.059323 |
| Noc2l         | chr4:156236009-156247616  | 58.9588  | 64.2394  | 0.1237  | 0.171447 |
| Esyt1         | chr10:128510247-128525859 | 197.9292 | 178.9684 | -0.1453 | 0.105831 |
| Mfsd2b        | chr12:4862439-4874359     | 0.6280   | 0.4484   | -0.4860 | 0.103388 |
| Gm23553       | chr13:9109304-9109599     | 4.1904   | 2.4253   | -0.7889 | 0.065243 |
| Sorcs2        | chr5:36017179-36398139    | 1.9757   | 1.5723   | -0.3295 | 0.201049 |
| Parp12        | chr6:39086409-39118349    | 7.9904   | 9.5443   | 0.2564  | 0.296437 |
| Cdca3         | chr6:124829546-124833701  | 3.4209   | 4.1610   | 0.2825  | 0.202110 |
| Npas1         | chr7:16455720-16476780    | 0.5433   | 0.3150   | -0.7865 | 0.087434 |



|                      |                           |          |          |         |          |
|----------------------|---------------------------|----------|----------|---------|----------|
| <i>Proser3</i>       | chr7:30539133-30552296    | 1.6577   | 1.3088   | -0.3410 | 0.037368 |
| <i>Zfp143</i>        | chr7:110061701-110095392  | 23.0562  | 25.2742  | 0.1325  | 0.097842 |
| <i>Fcer2a</i>        | chr8:3681736-3694174      | 0.6351   | 0.9010   | 0.5046  | 0.037492 |
| <i>Setd6</i>         | chr8:95715914-95719010    | 23.1343  | 25.3449  | 0.1317  | 0.075075 |
| <i>Dnaaf1</i>        | chr8:119575234-119598454  | 4.2737   | 3.5185   | -0.2805 | 0.095011 |
| <i>PsmA4</i>         | chr9:54950789-54958030    | 34.1570  | 38.8250  | 0.1848  | 0.218467 |
| <i>Cdkl5</i>         | chrX:160784307-160994702  | 0.5839   | 0.7846   | 0.4262  | 0.028637 |
| <i>Cpped1</i>        | chr16:11803720-11909445   | 0.9088   | 1.1321   | 0.3170  | 0.097703 |
| <i>3110001122Rik</i> | chr16:13671928-13678405   | 12.7799  | 10.6911  | -0.2575 | 0.141158 |
| <i>Dtymk</i>         | chr1:93792575-93801934    | 21.8301  | 19.2044  | -0.1849 | 0.084574 |
| <i>Zeb1</i>          | chr18:5591859-5775467     | 14.0770  | 15.1666  | 0.1076  | 0.091182 |
| <i>Mppe1</i>         | chr18:67225529-67245830   | 60.2369  | 54.3918  | -0.1473 | 0.047282 |
| <i>Gm14227</i>       | chr2:155198631-155199260  | 1.7459   | 0.9958   | -0.8101 | 0.109903 |
| <i>Ptprf</i>         | chr4:118208212-118291405  | 0.1583   | 0.0903   | -0.8108 | 0.174077 |
| <i>A430005L14Rik</i> | chr4:153957236-153961925  | 10.0938  | 11.4068  | 0.1764  | 0.039817 |
| <i>Plekhn1</i>       | chr4:156221455-156228542  | 5.4012   | 4.4280   | -0.2866 | 0.098662 |
| <i>Aqp11</i>         | chr7:97726378-97738247    | 0.9728   | 0.5817   | -0.7418 | 0.068303 |
| <i>Dock2</i>         | chr11:34226814-34783892   | 126.3417 | 136.7945 | 0.1147  | 0.213151 |
| <i>Syncrip</i>       | chr9:88449728-88482574    | 35.7881  | 38.5540  | 0.1074  | 0.101553 |
| <i>Dbndd2</i>        | chr2:164486105-164493319  | 1.1347   | 0.8576   | -0.4039 | 0.101506 |
| <i>Smpdl3a</i>       | chr10:57794334-57811830   | 52.8483  | 58.8765  | 0.1558  | 0.206682 |
| <i>Sos2</i>          | chr12:69583761-69681852   | 5.1219   | 5.8365   | 0.1884  | 0.248183 |
| <i>Vps41</i>         | chr13:18717291-18866809   | 33.6348  | 36.2109  | 0.1065  | 0.079599 |
| <i>4931431C16Rik</i> | chr5:35581226-35588763    | 3.0102   | 3.5818   | 0.2508  | 0.146173 |
| <i>1700049G17Rik</i> | chr7:27907391-27929460    | 2.0806   | 2.3688   | 0.1872  | 0.114272 |
| <i>0610043K17Rik</i> | chr4:101353782-101399181  | 2.5031   | 3.4405   | 0.4589  | 0.109746 |
| <i>2310022B05Rik</i> | chr8:124635765-124663369  | 0.9660   | 1.2822   | 0.4085  | 0.222520 |
| <i>Myo1e</i>         | chr9:70207349-70400067    | 0.3761   | 0.5948   | 0.6611  | 0.268017 |
| <i>Tor3a</i>         | chr1:156653616-156674356  | 6.1824   | 7.0899   | 0.1976  | 0.208201 |
| <i>Fam98b</i>        | chr2:117249738-117271540  | 2.2692   | 2.6964   | 0.2488  | 0.112537 |
| <i>Gm14494</i>       | chr2:153826052-153826834  | 3.0572   | 2.0796   | -0.5559 | 0.092299 |
| <i>Traj50</i>        | chr14:54167589-54167652   | 16.2698  | 9.0177   | -0.8514 | 0.073188 |
| <i>Lsr</i>           | chr7:30957408-30983169    | 3.5454   | 3.9528   | 0.1569  | 0.017648 |
| <i>Arg1</i>          | chr10:24915207-24927470   | 0.9573   | 0.5955   | -0.6850 | 0.055405 |
| <i>Gm20645</i>       | chr11:23736846-23740357   | 4.8886   | 5.7562   | 0.2357  | 0.260395 |
| <i>Slc16a5</i>       | chr11:115462473-115474398 | 18.2483  | 15.5391  | -0.2319 | 0.162462 |
| <i>Gm17194</i>       | chr12:79168485-79168833   | 6.0315   | 8.5161   | 0.4977  | 0.122426 |
| <i>Arid4b</i>        | chr13:14063231-14199603   | 16.0882  | 17.0820  | 0.0865  | 0.053446 |
| <i>Gm2420</i>        | chr5:32724351-32736194    | 1.9455   | 2.5410   | 0.3852  | 0.071446 |
| <i>Rchy1</i>         | chr5:91948903-91963068    | 17.9759  | 16.0202  | -0.1662 | 0.031812 |
| <i>Gm14335</i>       | chr6:115638249-115639059  | 2.5048   | 3.5925   | 0.5203  | 0.235642 |
| <i>Acer3</i>         | chr7:98213657-98321208    | 3.4120   | 3.9621   | 0.2157  | 0.160749 |
| <i>Casp3</i>         | chr8:46617448-46638706    | 13.2138  | 15.5851  | 0.2381  | 0.252794 |
| <i>Cers1</i>         | chr8:70315786-70331587    | 0.6490   | 0.4351   | -0.5767 | 0.067942 |
| <i>Calr</i>          | chr8:84841849-84846934    | 168.3593 | 184.6139 | 0.1330  | 0.233329 |
| <i>Sh3kbp1</i>       | chrX:159627271-159978069  | 51.9461  | 56.2966  | 0.1160  | 0.124659 |
| <i>Nfam1</i>         | chr15:82997720-83033306   | 1.4315   | 1.8223   | 0.3483  | 0.158868 |
| <i>Trav5-1</i>       | chr14:52622565-52623082   | 2.6993   | 4.2147   | 0.6428  | 0.043877 |
| <i>Irf9</i>          | chr14:55603570-55610030   | 42.2987  | 45.8720  | 0.1170  | 0.180107 |
| <i>Diap3</i>         | chr14:86655366-87141224   | 2.0144   | 2.5375   | 0.3331  | 0.296914 |
| <i>Mtpap</i>         | chr18:4375591-4397330     | 21.7977  | 23.5020  | 0.1086  | 0.053254 |
| <i>Snx2</i>          | chr18:53176364-53220860   | 34.3071  | 37.7384  | 0.1375  | 0.153679 |
| <i>Pcyox1l</i>       | chr18:61696836-61707635   | 0.5479   | 0.8007   | 0.5475  | 0.176506 |
| <i>Mbd2</i>          | chr18:70568188-70626131   | 72.0687  | 78.7613  | 0.1281  | 0.147844 |
| <i>Gm13349</i>       | chr2:18338578-18338989    | 2.5064   | 1.3690   | -0.8725 | 0.110034 |
| <i>Zmat3</i>         | chr3:32334795-32365678    | 1.4874   | 1.1765   | -0.3383 | 0.183520 |
| <i>Spag17</i>        | chr3:99885405-100143322   | 1.3992   | 1.6192   | 0.2107  | 0.066768 |
| <i>Abcd3</i>         | chr3:121758908-121815302  | 9.0623   | 8.0239   | -0.1756 | 0.035157 |
| <i>Fam213b</i>       | chr4:154895503-154899135  | 0.7454   | 1.2501   | 0.7459  | 0.078980 |
| <i>Prss36</i>        | chr7:127932637-127946725  | 0.5497   | 0.3534   | -0.6375 | 0.092628 |
| <i>A930012O16Rik</i> | chr2:57236226-57238508    | 0.8150   | 1.1667   | 0.5176  | 0.021943 |
| <i>Gm12739</i>       | chr4:108484170-108484552  | 3.5179   | 5.0663   | 0.5262  | 0.056030 |
| <i>Hspa2</i>         | chr12:76404175-76406934   | 0.2571   | 0.4595   | 0.8378  | 0.177126 |
| <i>Pald1</i>         | chr10:61319656-61383523   | 0.1782   | 0.3193   | 0.8416  | 0.184014 |
| <i>Mrpl34</i>        | chr8:71464925-71465752    | 37.8332  | 45.0151  | 0.2508  | 0.237729 |
| <i>Tmem88</i>        | chr11:69396518-69398234   | 7.2157   | 8.5233   | 0.2403  | 0.155784 |
| <i>Grk5</i>          | chr19:60889748-61092553   | 1.4567   | 1.1030   | -0.4012 | 0.098929 |
| <i>Sept7</i>         | chr9:25252438-25308571    | 156.6068 | 175.9539 | 0.1681  | 0.223390 |
| <i>BC094916</i>      | chr1:173519716-173535957  | 39.6170  | 45.3383  | 0.1946  | 0.287454 |
| <i>Aida</i>          | chr1:183297059-183324501  | 9.5814   | 10.6511  | 0.1527  | 0.147225 |
| <i>Armc10</i>        | chr5:21645812-21662694    | 26.9816  | 29.7595  | 0.1414  | 0.146322 |

|                      |                           |          |          |         |          |
|----------------------|---------------------------|----------|----------|---------|----------|
| <i>Oas1c</i>         | chr5:120800193-120812514  | 9.6917   | 10.9120  | 0.1711  | 0.133607 |
| <i>Ciita</i>         | chr16:10488177-10527564   | 0.4321   | 0.5728   | 0.4065  | 0.046223 |
| <i>B930094E09Rik</i> | chr18:31609511-31610751   | 4.9429   | 3.8901   | -0.3455 | 0.077392 |
| <i>Vmp1</i>          | chr11:86583864-86683836   | 35.2584  | 46.2234  | 0.3907  | 0.197624 |
| <i>Pkn1</i>          | chr8:83669761-83699179    | 32.7709  | 29.8746  | -0.1335 | 0.063284 |
| <i>Ncor1</i>         | chr11:62316425-62458541   | 51.6837  | 54.7945  | 0.0843  | 0.075384 |
| <i>Gm11725</i>       | chr11:117871249-117887416 | 3.4478   | 2.7133   | -0.3456 | 0.066324 |
| <i>Igf2bp3</i>       | chr6:49085220-49214954    | 2.1512   | 2.5810   | 0.2628  | 0.217859 |
| <i>Nup133</i>        | chr8:123897122-123949265  | 7.5718   | 6.7574   | -0.1642 | 0.020057 |
| <i>Gm26527</i>       | chr13:93940989-93943015   | 1.7274   | 2.3689   | 0.4556  | 0.247154 |
| <i>Rrad</i>          | chr8:104628065-104631321  | 14.9792  | 12.6960  | -0.2386 | 0.104142 |
| <i>Zfp442</i>        | chr2:150407140-150451486  | 0.7340   | 1.0664   | 0.5389  | 0.219234 |
| <i>Gnb2</i>          | chr5:137528126-137533510  | 50.5069  | 44.4719  | -0.1836 | 0.124554 |
| <i>Atg4d</i>         | chr9:21265298-21274368    | 36.0360  | 32.4072  | -0.1531 | 0.068152 |
| <i>Zfp850s</i>       | chr13:67729261-67756838   | 0.8295   | 1.0447   | 0.3329  | 0.076627 |
| <i>Pdss2</i>         | chr10:43221485-43464882   | 2.5176   | 2.1316   | -0.2401 | 0.065390 |
| <i>Map2k2</i>        | chr10:81105914-81124697   | 22.3841  | 19.8253  | -0.1751 | 0.099011 |
| <i>Lsm11</i>         | chr11:45928268-45944935   | 5.7882   | 5.1404   | -0.1712 | 0.040766 |
| <i>Ncapg2</i>        | chr12:116405401-116463531 | 2.5942   | 3.1720   | 0.2901  | 0.300608 |
| <i>Cad</i>           | chr5:31054779-31078479    | 14.7747  | 12.8668  | -0.1995 | 0.185024 |
| <i>Mfge8</i>         | chr7:79133768-79149060    | 7.8191   | 6.6594   | -0.2316 | 0.083336 |
| <i>Ccdc130</i>       | chr8:84257794-84270380    | 5.2080   | 5.9652   | 0.1959  | 0.114204 |
| <i>Ifngr2</i>        | chr16:91547071-91565169   | 10.9286  | 9.4131   | -0.2154 | 0.108273 |
| <i>Gm22697</i>       | chr18:42301889-42301952   | 15.8450  | 8.9835   | -0.8187 | 0.069815 |
| <i>Iffo2</i>         | chr4:139530547-139620382  | 5.6075   | 4.8481   | -0.2099 | 0.104187 |
| <i>A230020J21Rik</i> | chr1:191025349-191026186  | 6.5857   | 4.9914   | -0.3999 | 0.144020 |
| <i>Crebrf</i>        | chr17:26715649-26776635   | 34.0202  | 36.3459  | 0.0954  | 0.076738 |
| <i>Clk1</i>          | chr1:58410188-58424066    | 124.2937 | 113.0138 | -0.1373 | 0.060516 |
| <i>Shhg5</i>         | chr9:88521051-88522929    | 38.9749  | 43.3561  | 0.1537  | 0.179049 |
| <i>Sulf2</i>         | chr2:166073088-166155663  | 0.6292   | 0.4689   | -0.4243 | 0.072709 |
| <i>Gm15472</i>       | chr3:103863165-103864423  | 10.8679  | 8.9137   | -0.2860 | 0.077848 |
| <i>Cd5</i>           | chr19:10718142-10738974   | 114.6245 | 122.1331 | 0.0915  | 0.144661 |
| <i>Snapc4</i>        | chr2:26362764-26380653    | 11.7358  | 10.6766  | -0.1365 | 0.016158 |
| <i>Prdm11</i>        | chr2:92965150-93046167    | 2.0249   | 1.7393   | -0.2194 | 0.154269 |
| <i>Gm13346</i>       | chr2:19676710-19686157    | 0.2113   | 0.3517   | 0.7346  | 0.144231 |
| <i>Diablo</i>        | chr5:123509764-123524176  | 12.4301  | 11.1422  | -0.1578 | 0.038323 |
| <i>Snora30</i>       | chr7:127527873-127528003  | 9.5888   | 6.0515   | -0.6641 | 0.001945 |
| <i>Eij2s1</i>        | chr12:78861818-78887010   | 32.5340  | 36.2339  | 0.1554  | 0.193115 |
| <i>Vmn1r-ps145</i>   | chr17:20969060-20969484   | 1.2970   | 2.2553   | 0.7981  | 0.123392 |
| <i>Gm16549</i>       | chr14:72589751-72603367   | 3.7381   | 2.4197   | -0.6275 | 0.071902 |
| <i>Gmfg</i>          | chr7:28437446-28448233    | 29.6286  | 33.6968  | 0.1856  | 0.220355 |
| <i>Tmem55a</i>       | chr4:14864075-14915176    | 7.4558   | 8.5870   | 0.2038  | 0.183049 |
| <i>Fbxo30</i>        | chr10:11281329-11298052   | 1.8453   | 2.1401   | 0.2138  | 0.062294 |
| <i>NA</i>            | chr10:59221952-59226431   | 0.2749   | 0.3923   | 0.5128  | 0.014352 |
| <i>Sowahc</i>        | chr10:59221952-59226434   | 0.2746   | 0.3918   | 0.5128  | 0.014352 |
| <i>Ipmk</i>          | chr10:71347762-71433327   | 4.1167   | 4.5204   | 0.1349  | 0.063443 |
| <i>Gm11491</i>       | chr11:87121566-87126958   | 3.5816   | 4.4006   | 0.2971  | 0.038242 |
| <i>Cdk5rap3</i>      | chr11:96907425-96916496   | 14.5409  | 16.0570  | 0.1431  | 0.171887 |
| <i>Rsad2</i>         | chr12:26442752-26456452   | 2.9846   | 5.3957   | 0.8542  | 0.147129 |
| <i>Atxn71l</i>       | chr12:33147692-33375659   | 3.8937   | 4.5398   | 0.2215  | 0.307060 |
| <i>1110008L16Rik</i> | chr12:55302636-55382491   | 6.5711   | 7.3824   | 0.1680  | 0.123847 |
| <i>Rpl36al</i>       | chr12:69182730-69184083   | 16.8674  | 13.8224  | -0.2872 | 0.207604 |
| <i>Exd2</i>          | chr12:80463094-80498135   | 13.0360  | 11.5874  | -0.1699 | 0.045645 |
| <i>2410016O06Rik</i> | chr12:83950607-83952953   | 17.1029  | 14.8905  | -0.1998 | 0.095638 |
| <i>Tnip2</i>         | chr5:34496086-34513997    | 6.1070   | 7.0076   | 0.1984  | 0.165022 |
| <i>Prkab1</i>        | chr5:116013585-116024508  | 17.8834  | 19.2476  | 0.1061  | 0.041809 |
| <i>Erdr1</i>         | chrY:90784737-90816464    | 4.6320   | 6.2221   | 0.4258  | 0.238592 |
| <i>Ube2s</i>         | chr7:4808154-4812351      | 7.4388   | 6.0033   | -0.3093 | 0.021437 |
| <i>Polr3e</i>        | chr7:120917743-120947432  | 20.4383  | 18.4779  | -0.1455 | 0.040349 |
| <i>2310057M21Rik</i> | chr7:131342717-131362698  | 6.0085   | 5.1197   | -0.2309 | 0.019913 |
| <i>Mau2</i>          | chr8:70016122-70042734    | 44.7763  | 40.9445  | -0.1291 | 0.054054 |
| <i>N4bp1</i>         | chr8:86841138-86885258    | 8.2523   | 9.5744   | 0.2144  | 0.288124 |
| <i>Rasl12</i>        | chr9:65398487-65414853    | 0.1277   | 0.2792   | 1.1284  | 0.171297 |
| <i>Gm15008</i>       | chrX:36910833-36911985    | 3.4432   | 2.2744   | -0.5983 | 0.019262 |
| <i>Slc9a6</i>        | chrX:56609756-56664230    | 5.5615   | 4.7831   | -0.2175 | 0.123695 |
| <i>Snord8</i>        | chr14:52209784-52209894   | 10.2567  | 6.1632   | -0.7348 | 0.035612 |
| <i>D630044L22Rik</i> | chr17:25951471-25963610   | 1.3528   | 1.0017   | -0.4334 | 0.143529 |
| <i>Hspa1l</i>        | chr17:34972702-34979284   | 1.9819   | 1.5522   | -0.3526 | 0.028408 |
| <i>Flot1</i>         | chr17:35823229-35832791   | 16.9742  | 19.6546  | 0.2115  | 0.283496 |
| <i>Fez2</i>          | chr17:78377884-78418131   | 10.5785  | 11.9098  | 0.1710  | 0.140414 |
| <i>Sult6b1</i>       | chr17:78883937-78906992   | 1.8102   | 2.3348   | 0.3671  | 0.187804 |

|                      |                           |          |          |         |          |
|----------------------|---------------------------|----------|----------|---------|----------|
| <i>Senp2</i>         | chr16:22009483-22049269   | 24.1294  | 21.6086  | -0.1592 | 0.077809 |
| <i>Lpp</i>           | chr16:24393349-24992576   | 3.9601   | 4.4487   | 0.1678  | 0.274256 |
| <i>Esrra</i>         | chr19:6910976-6921813     | 11.9513  | 10.5059  | -0.1860 | 0.057351 |
| <i>Rftn2</i>         | chr1:55170158-55226782    | 1.7080   | 1.9926   | 0.2223  | 0.113060 |
| <i>Ramp1</i>         | chr1:91179821-91225196    | 13.3270  | 10.5271  | -0.3402 | 0.219805 |
| <i>Brox</i>          | chr1:183276341-183297256  | 16.6643  | 14.6743  | -0.1835 | 0.089121 |
| <i>Psmd5</i>         | chr2:34852087-34870939    | 18.0525  | 15.7926  | -0.1930 | 0.111094 |
| <i>Med19</i>         | chr2:84678401-84688215    | 14.8305  | 16.5192  | 0.1556  | 0.117883 |
| <i>Apoa1bp</i>       | chr3:88056522-88058495    | 27.4384  | 30.5130  | 0.1532  | 0.118909 |
| <i>Cep85</i>         | chr4:134129857-134187112  | 14.7823  | 13.2941  | -0.1531 | 0.032584 |
| <i>Gm25951</i>       | chr4:140717042-140717106  | 86.2781  | 67.9613  | -0.3443 | 0.046445 |
| <i>Rps15-ps2</i>     | chr6:58017489-58017975    | 2.9710   | 1.6068   | -0.8868 | 0.169828 |
| <i>Ccdc157</i>       | chr11:4141122-4160293     | 2.5679   | 2.1895   | -0.2300 | 0.048121 |
| <i>Orc3</i>          | chr4:34570795-34614944    | 25.3360  | 27.2314  | 0.1041  | 0.112369 |
| <i>Sesn3</i>         | chr9:14276300-14326138    | 52.8915  | 47.6735  | -0.1498 | 0.077383 |
| <i>Tagap1</i>        | chr17:6954964-6961156     | 8.2553   | 7.0969   | -0.2181 | 0.080582 |
| <i>Pik3r2</i>        | chr8:70768175-70776713    | 3.2930   | 3.8441   | 0.2232  | 0.188466 |
| <i>Dpp4</i>          | chr2:62330072-62412231    | 75.0242  | 80.8002  | 0.1070  | 0.190802 |
| <i>4930513N10Rik</i> | chr8:95806829-95821728    | 1.5669   | 1.2389   | -0.3389 | 0.081366 |
| <i>Gm22711</i>       | chr11:106501242-106501377 | 11.4156  | 6.8204   | -0.7431 | 0.138415 |
| <i>Nat9</i>          | chr11:115182831-115187859 | 2.7187   | 3.2862   | 0.2735  | 0.072250 |
| <i>Ybx3</i>          | chr6:131364857-131388450  | 14.3571  | 16.7731  | 0.2244  | 0.291112 |
| <i>Klhl42</i>        | chr6:147091378-147112778  | 22.1418  | 19.6082  | -0.1753 | 0.119986 |
| <i>C1qbp</i>         | chr11:70977835-70983026   | 19.3221  | 17.1974  | -0.1681 | 0.059952 |
| <i>Cep170b</i>       | chr12:112722173-112746591 | 1.3391   | 1.0842   | -0.3046 | 0.127525 |
| <i>Sirt5</i>         | chr13:43370709-43395202   | 9.2798   | 7.8305   | -0.2450 | 0.055923 |
| <i>Unc5a</i>         | chr13:54949410-55006018   | 0.8727   | 1.2452   | 0.5128  | 0.233729 |
| <i>Lpcat1</i>        | chr13:73467196-73516422   | 7.2385   | 6.1718   | -0.2300 | 0.132328 |
| <i>Chchd2</i>        | chr5:129881155-129887470  | 23.6613  | 19.4790  | -0.2806 | 0.237875 |
| <i>Etv6</i>          | chr6:134035699-134270158  | 3.7216   | 4.3062   | 0.2105  | 0.251458 |
| <i>Ube2m</i>         | chr7:13035119-13038275    | 34.4010  | 37.6887  | 0.1317  | 0.184081 |
| <i>Gm23094</i>       | chr8:25678949-25679271    | 2.6938   | 4.2808   | 0.6682  | 0.162900 |
| <i>Zmat1</i>         | chrX:134971371-135009209  | 1.0230   | 1.2445   | 0.2828  | 0.089710 |
| <i>Top1mt</i>        | chr15:75657034-75678800   | 6.5126   | 7.5013   | 0.2039  | 0.104619 |
| <i>Tm9sf2</i>        | chr14:122107037-122159604 | 64.9405  | 57.4656  | -0.1764 | 0.137891 |
| <i>Rftn1</i>         | chr17:49992256-50190674   | 26.5446  | 24.0916  | -0.1399 | 0.034379 |
| <i>Hecw2</i>         | chr1:53806881-54195168    | 0.0496   | 0.0936   | 0.9152  | 0.297316 |
| <i>Pqlc1</i>         | chr18:80253291-80292725   | 1.6679   | 1.3854   | -0.2678 | 0.065712 |
| <i>Zbtb10</i>        | chr3:9250601-9285333      | 0.7328   | 0.9060   | 0.3062  | 0.134350 |
| <i>Mmadhc</i>        | chr2:50279880-50296801    | 19.2629  | 16.8638  | -0.1919 | 0.083751 |
| <i>Tet1</i>          | chr10:62804569-62899118   | 3.3327   | 2.9607   | -0.1707 | 0.062175 |
| <i>Gm12167</i>       | chr11:46342286-46345020   | 109.5245 | 121.3622 | 0.1481  | 0.167761 |
| <i>Slc36a3</i>       | chr11:55124814-55151708   | 0.9333   | 0.6450   | -0.5332 | 0.065229 |
| <i>Lgals9</i>        | chr11:78962973-78984946   | 22.3642  | 24.5949  | 0.1372  | 0.187485 |
| <i>Snf8</i>          | chr11:96034884-96047430   | 12.0557  | 10.5985  | -0.1859 | 0.044002 |
| <i>Cant1</i>         | chr11:118406288-118419086 | 13.7886  | 12.3834  | -0.1551 | 0.058996 |
| <i>Clns1a</i>        | chr7:97696633-97718879    | 44.6009  | 39.3868  | -0.1794 | 0.108261 |
| <i>Pgk1</i>          | chrX:106187099-106203699  | 3.2716   | 2.5906   | -0.3367 | 0.128999 |
| <i>Rab9</i>          | chrX:166457252-166479867  | 10.6673  | 12.3445  | 0.2107  | 0.196519 |
| <i>Npff</i>          | chr15:102523842-102524621 | 3.8739   | 5.3118   | 0.4554  | 0.078155 |
| <i>Esco2</i>         | chr14:65819037-65833994   | 1.4874   | 2.0057   | 0.4313  | 0.304253 |
| <i>Rnf2</i>          | chr1:151469405-151500823  | 28.9373  | 31.4019  | 0.1179  | 0.109142 |
| <i>Fcer1g</i>        | chr1:171229571-171234365  | 1.2551   | 2.0260   | 0.6908  | 0.252443 |
| <i>Mtx2</i>          | chr2:74825802-74878431    | 6.3685   | 5.5526   | -0.1978 | 0.032942 |
| <i>Rere</i>          | chr4:150281645-150621966  | 6.1606   | 7.0053   | 0.1854  | 0.266662 |
| <i>Epb4.2</i>        | chr2:121017890-121037072  | 0.0967   | 0.1758   | 0.8622  | 0.158465 |
| <i>Snora34</i>       | chr15:98519715-98519853   | 8.8145   | 4.9432   | -0.8344 | 0.171476 |
| <i>Gm16158</i>       | chr7:68338667-68353201    | 9.6768   | 11.8283  | 0.2896  | 0.256913 |
| <i>Trim30d</i>       | chr7:104470013-104507849  | 9.9047   | 12.1259  | 0.2919  | 0.352686 |
| <i>Slamf7</i>        | chr1:171634924-171649007  | 14.3884  | 18.2314  | 0.3415  | 0.328572 |
| <i>Ntmt1</i>         | chr2:30807825-30823033    | 5.6335   | 4.8640   | -0.2119 | 0.013711 |
| <i>Gm23833</i>       | chr17:12770630-12770882   | 4.5432   | 7.0148   | 0.6267  | 0.180103 |
| <i>Parp9</i>         | chr16:35938469-35972605   | 51.9024  | 57.9263  | 0.1584  | 0.247469 |
| <i>Ppp1r16b</i>      | chr2:158665397-158766334  | 10.7110  | 9.6675   | -0.1479 | 0.057531 |
| <i>Gm15471</i>       | chr3:103803128-103808439  | 5.4545   | 4.3462   | -0.3277 | 0.080572 |
| <i>Mtor</i>          | chr4:148448610-148557683  | 10.6808  | 9.6063   | -0.1530 | 0.102078 |
| <i>Ttc7b</i>         | chr12:100300770-100520822 | 10.4099  | 11.3854  | 0.1292  | 0.127042 |
| <i>Mcm3ap</i>        | chr10:76468970-76515856   | 19.7802  | 17.8846  | -0.1453 | 0.065707 |
| <i>Dazap1</i>        | chr10:80261485-80288408   | 27.6420  | 31.1857  | 0.1740  | 0.255991 |
| <i>Zbtb39</i>        | chr10:127739537-127747335 | 2.0495   | 2.3593   | 0.2031  | 0.147861 |
| <i>Nacad</i>         | chr11:6597822-6606053     | 3.0796   | 2.4550   | -0.3270 | 0.204153 |

|                      |                           |          |          |         |          |
|----------------------|---------------------------|----------|----------|---------|----------|
| <i>Sarm1</i>         | chr11:78472329-78497754   | 0.2297   | 0.1365   | -0.7509 | 0.155308 |
| <i>Pcgf2</i>         | chr11:97688822-97700497   | 0.2529   | 0.4025   | 0.6703  | 0.154640 |
| <i>Z310003H01Rik</i> | chr11:120369054-120378764 | 4.2569   | 3.6634   | -0.2166 | 0.110036 |
| <i>Fntb</i>          | chr12:76765588-76921412   | 10.5543  | 9.3031   | -0.1820 | 0.080602 |
| <i>Cd83</i>          | chr13:43785106-43803130   | 2.3389   | 2.9358   | 0.3280  | 0.192184 |
| <i>Kmt2e</i>         | chr5:23434440-23504235    | 26.4614  | 29.9420  | 0.1783  | 0.314507 |
| <i>Klf3</i>          | chr5:64803522-64830129    | 82.6691  | 95.0650  | 0.2016  | 0.297455 |
| <i>Wdr19</i>         | chr5:65199695-65260415    | 3.5520   | 4.0357   | 0.1842  | 0.147944 |
| <i>Hnrnpdl</i>       | chr5:100033576-100039664  | 78.3882  | 84.0305  | 0.1003  | 0.124290 |
| <i>Lamtor4</i>       | chr5:138255607-138259398  | 26.4731  | 22.5321  | -0.2325 | 0.149853 |
| <i>Gm6288</i>        | chr6:147442801-147476046  | 0.6071   | 0.9284   | 0.6127  | 0.087216 |
| <i>Zfp128</i>        | chr7:12881176-12893422    | 2.6402   | 3.0427   | 0.2047  | 0.088773 |
| <i>Timm50</i>        | chr7:28305515-28312072    | 9.3367   | 8.1003   | -0.2049 | 0.065740 |
| <i>Iftm10</i>        | chr7:142325836-142373753  | 2.8589   | 3.5486   | 0.3118  | 0.239595 |
| <i>Cars2</i>         | chr8:11514020-11550771    | 14.2488  | 12.3319  | -0.2085 | 0.093419 |
| <i>Polb</i>          | chr8:22628118-22653437    | 20.2300  | 22.4702  | 0.1515  | 0.081891 |
| <i>Gins3</i>         | chr8:95633558-95645059    | 5.6440   | 4.8252   | -0.2261 | 0.026243 |
| <i>Fbxo22</i>        | chr9:55208924-55224433    | 24.9891  | 22.6311  | -0.1430 | 0.011215 |
| <i>Pias1</i>         | chr9:62880076-62980879    | 21.3499  | 23.1908  | 0.1193  | 0.150800 |
| <i>Rab8b</i>         | chr9:66843671-66919705    | 36.9426  | 39.5966  | 0.1001  | 0.093657 |
| <i>Rfx7</i>          | chr9:72532239-72622937    | 9.2170   | 10.3805  | 0.1715  | 0.301040 |
| <i>Lrrc1</i>         | chr9:77430822-77544059    | 9.6206   | 8.1443   | -0.2403 | 0.136755 |
| <i>Cep70</i>         | chr9:99243441-99300401    | 5.3769   | 6.1794   | 0.2007  | 0.170956 |
| <i>Gm20662</i>       | chr9:107996348-108045270  | 36.7013  | 32.4810  | -0.1762 | 0.091385 |
| <i>Tmppe</i>         | chr9:114401094-114411200  | 8.3298   | 7.4179   | -0.1673 | 0.094130 |
| <i>Armxc4</i>        | chrX:134686518-134696757  | 1.2929   | 1.0854   | -0.2523 | 0.038264 |
| <i>Spag1</i>         | chr15:36179367-36235610   | 2.4376   | 2.0047   | -0.2821 | 0.087969 |
| <i>Dock9</i>         | chr14:121542038-121797734 | 8.1262   | 9.1156   | 0.1658  | 0.270226 |
| <i>Ccdc78</i>        | chr17:25786579-25790513   | 4.1895   | 3.2759   | -0.3549 | 0.150971 |
| <i>Gm15598</i>       | chr17:27988027-28008432   | 4.5677   | 3.3409   | -0.4512 | 0.120666 |
| <i>Epas1</i>         | chr17:86753906-86833410   | 0.2968   | 0.1926   | -0.6240 | 0.054907 |
| <i>Cd274</i>         | chr19:29367454-29388095   | 13.4642  | 15.1134  | 0.1667  | 0.249333 |
| <i>Nit1</i>          | chr1:171338007-171345646  | 13.7763  | 12.4120  | -0.1505 | 0.030790 |
| <i>Zmat2</i>         | chr18:36793922-36799660   | 30.8177  | 35.1798  | 0.1910  | 0.262926 |
| <i>Grpel2</i>        | chr18:61712439-61726331   | 9.6141   | 8.5202   | -0.1743 | 0.042200 |
| <i>Gm9823</i>        | chr2:29738334-29738665    | 31.3113  | 26.3695  | -0.2478 | 0.019780 |
| <i>Fahd2a</i>        | chr2:127436214-127444565  | 7.7685   | 6.4599   | -0.2661 | 0.094745 |
| <i>Top1</i>          | chr2:160645887-160722764  | 13.2801  | 14.4491  | 0.1217  | 0.155112 |
| <i>Mex3a</i>         | chr3:88532394-88541396    | 1.5408   | 1.2482   | -0.3038 | 0.105570 |
| <i>Mllt11</i>        | chr3:95219134-95228677    | 17.7781  | 15.7260  | -0.1769 | 0.044556 |
| <i>Fmo5</i>          | chr3:97628803-97655282    | 1.0454   | 1.2517   | 0.2598  | 0.090646 |
| <i>Slc39a8</i>       | chr3:135825278-135888572  | 0.5793   | 0.7184   | 0.3104  | 0.168050 |
| <i>Smim8</i>         | chr4:34768663-34778423    | 10.7185  | 12.8142  | 0.2576  | 0.253585 |
| <i>Inpp5k</i>        | chr11:75630987-75648871   | 17.9326  | 19.2180  | 0.0999  | 0.116109 |
| <i>Rps17</i>         | chr7:81342731-81345254    | 8.0540   | 6.5395   | -0.3005 | 0.128663 |
| <i>Prss53</i>        | chr7:127885840-127890970  | 4.2186   | 3.4734   | -0.2804 | 0.066965 |
| <i>Sgol1</i>         | chr17:53674785-53689333   | 1.5739   | 1.9535   | 0.3118  | 0.173826 |
| <i>Dhx9</i>          | chr1:153455757-153487660  | 37.0140  | 41.7744  | 0.1745  | 0.330063 |
| <i>Lrrc8a</i>        | chr2:30237714-30282148    | 19.9563  | 18.0537  | -0.1445 | 0.071978 |
| <i>Gpd2</i>          | chr2:57237634-57370719    | 7.0642   | 6.1686   | -0.1956 | 0.120964 |
| <i>Zc3h12d</i>       | chr10:7832469-7870397     | 21.3288  | 23.6095  | 0.1466  | 0.251388 |
| <i>Pik3ip1</i>       | chr11:3330400-3342971     | 55.1988  | 50.8910  | -0.1172 | 0.020885 |
| <i>Morc2a</i>        | chr11:3649493-3690477     | 15.9781  | 14.5456  | -0.1355 | 0.040426 |
| <i>Rnf215</i>        | chr11:4135201-4141172     | 11.9725  | 13.2261  | 0.1437  | 0.134019 |
| <i>Ccm2</i>          | chr11:6546886-6596744     | 56.7639  | 51.3723  | -0.1440 | 0.064675 |
| <i>Nhp2</i>          | chr11:51619734-51623714   | 52.0073  | 59.6964  | 0.1989  | 0.261509 |
| <i>Srebfl1</i>       | chr11:60199088-60222581   | 24.5563  | 21.8501  | -0.1685 | 0.152417 |
| <i>Trpv2</i>         | chr11:62574485-62600515   | 22.7731  | 20.4337  | -0.1564 | 0.096599 |
| <i>Prkca</i>         | chr11:107933386-108343928 | 9.2959   | 10.4607  | 0.1703  | 0.303995 |
| <i>Gm11739</i>       | chr11:116466318-116474274 | 4.5532   | 3.3178   | -0.4567 | 0.093860 |
| <i>Oas2</i>          | chr5:120730332-120749853  | 2.3932   | 4.2604   | 0.8320  | 0.185448 |
| <i>Trbj2-5</i>       | chr6:41543452-41543501    | 158.5016 | 131.0814 | -0.2740 | 0.018004 |
| <i>Usp5</i>          | chr6:124815018-124829484  | 26.6195  | 24.3745  | -0.1271 | 0.029667 |
| <i>Klra6</i>         | chr6:130013032-130026954  | 3.8172   | 4.8577   | 0.3478  | 0.213025 |
| <i>Snord32a</i>      | chr7:45127381-45127464    | 101.0251 | 129.6553 | 0.3600  | 0.313172 |
| <i>Usp35</i>         | chr7:97309379-97332020    | 1.4742   | 1.2118   | -0.2828 | 0.053722 |
| <i>Cyp2r1</i>        | chr7:114550165-114562972  | 2.2366   | 1.6141   | -0.4705 | 0.182668 |
| <i>Zfp646</i>        | chr7:127876795-127885996  | 40.2273  | 36.6529  | -0.1342 | 0.072099 |
| <i>Gm15542</i>       | chr7:140890886-140892080  | 2.3553   | 3.0437   | 0.3699  | 0.104112 |
| <i>Eps15l1</i>       | chr8:72341000-72421474    | 22.4981  | 24.1744  | 0.1037  | 0.085443 |
| <i>Nol3</i>          | chr8:105276446-105281939  | 0.3674   | 0.2170   | -0.7597 | 0.059321 |

|                      |                           |          |          |         |          |
|----------------------|---------------------------|----------|----------|---------|----------|
| <i>Fam65a</i>        | chr8:105605228-105622194  | 2.3938   | 1.9625   | -0.2866 | 0.119887 |
| <i>Cdyl2</i>         | chr8:116568723-116732991  | 5.2537   | 4.6730   | -0.1690 | 0.071378 |
| <i>Cwc15</i>         | chr9:14500616-14510577    | 88.6768  | 100.2282 | 0.1767  | 0.250784 |
| <i>Fli1</i>          | chr9:32422207-32541389    | 77.2864  | 86.2699  | 0.1586  | 0.246164 |
| <i>Slc9a9</i>        | chr9:94669908-95230445    | 15.3442  | 16.9936  | 0.1473  | 0.282058 |
| <i>Pik3r4</i>        | chr9:105642994-105687655  | 12.8892  | 11.3846  | -0.1791 | 0.122885 |
| <i>Poc1a</i>         | chr9:106281060-106349891  | 2.5851   | 2.0271   | -0.3508 | 0.009935 |
| <i>Acy1</i>          | chr9:106432995-106438236  | 6.5198   | 7.4722   | 0.1967  | 0.011547 |
| <i>Tmem42</i>        | chr9:123021325-123023490  | 15.7846  | 13.5999  | -0.2149 | 0.053676 |
| <i>Nkrf</i>          | chrX:36887539-36902899    | 6.4776   | 7.3522   | 0.1827  | 0.182570 |
| <i>Smc1a</i>         | chrX:152016427-152062694  | 56.7430  | 61.6020  | 0.1185  | 0.180408 |
| <i>Lmbr1l</i>        | chr15:98903920-98918231   | 23.1842  | 20.9877  | -0.1436 | 0.069500 |
| <i>Hnrnpa1</i>       | chr15:103240431-103244955 | 13.2758  | 14.9223  | 0.1687  | 0.172179 |
| <i>Wdfy4</i>         | chr14:32959546-33185508   | 0.2462   | 0.3618   | 0.5553  | 0.285207 |
| <i>Traj40</i>        | chr14:54177920-54177981   | 41.5328  | 29.0501  | -0.5157 | 0.119658 |
| <i>Rps2</i>          | chr17:24718115-24721929   | 127.0467 | 146.9396 | 0.2099  | 0.302324 |
| <i>Ccdc167</i>       | chr17:29689377-29717012   | 13.6181  | 12.0222  | -0.1798 | 0.129353 |
| <i>H2-Q2</i>         | chr17:35342241-35346762   | 0.8552   | 0.5546   | -0.6249 | 0.137948 |
| <i>Tmem191c</i>      | chr16:172762997-17283229  | 5.9990   | 5.0587   | -0.2459 | 0.113115 |
| <i>Serpind1</i>      | chr16:17331370-17343575   | 0.9814   | 0.6703   | -0.5500 | 0.089719 |
| <i>Dscr3</i>         | chr16:94497782-94526830   | 18.7390  | 16.6064  | -0.1743 | 0.086505 |
| <i>Ppp1r32</i>       | chr19:10474256-10482897   | 0.8027   | 0.4935   | -0.7017 | 0.051564 |
| <i>Ivns1abp</i>      | chr1:151344497-151364445  | 77.7273  | 69.2794  | -0.1660 | 0.132541 |
| <i>AW554918</i>      | chr18:25168998-25467321   | 3.6190   | 4.0177   | 0.1508  | 0.120104 |
| <i>Yipf5</i>         | chr18:40204864-40219399   | 12.2815  | 13.5731  | 0.1443  | 0.116043 |
| <i>Ldlrad4</i>       | chr18:67933256-68255549   | 12.8538  | 14.3144  | 0.1553  | 0.177380 |
| <i>Cacnb2</i>        | chr2:14604305-14987908    | 0.0553   | 0.1056   | 0.9336  | 0.213898 |
| <i>Alkbh3</i>        | chr2:93980549-94010807    | 10.0833  | 11.1850  | 0.1496  | 0.170387 |
| <i>Eif3j1</i>        | chr2:122028545-122056598  | 3.3629   | 3.7508   | 0.1575  | 0.099719 |
| <i>Eid1</i>          | chr2:125673099-125675638  | 25.1516  | 28.2174  | 0.1659  | 0.198282 |
| <i>9830144P21Rik</i> | chr2:129205957-129230579  | 9.9401   | 8.8791   | -0.1629 | 0.058388 |
| <i>Cenpb</i>         | chr2:131177290-131180012  | 25.9284  | 29.1956  | 0.1712  | 0.251784 |
| <i>Arfrp1</i>        | chr2:181357689-181365404  | 18.6066  | 16.8222  | -0.1455 | 0.046517 |
| <i>Fam189b</i>       | chr3:89183142-89189295    | 37.7402  | 33.5529  | -0.1697 | 0.117999 |
| <i>S100a4</i>        | chr3:90603769-90606045    | 14.6224  | 19.5530  | 0.4192  | 0.306908 |
| <i>Gem</i>           | chr4:11704456-11714752    | 2.3940   | 3.0918   | 0.3690  | 0.228637 |
| <i>Smc21</i>         | chr4:52439242-52488260    | 15.0159  | 16.5311  | 0.1387  | 0.205339 |
| <i>Ubxn11</i>        | chr4:134102569-134127593  | 26.4939  | 29.4501  | 0.1526  | 0.245937 |
| <i>Gm21969</i>       | chr4:139603185-139662691  | 5.6774   | 4.8991   | -0.2127 | 0.106671 |
| <i>Havcr2</i>        | chr11:46454934-46481255   | 0.4787   | 0.8782   | 0.8755  | 0.300565 |
| <i>Ccrl2</i>         | chr9:111054834-111057270  | 0.2304   | 0.4693   | 1.0264  | 0.243818 |
| <i>Tcrg-C4</i>       | chr13:19342185-19352343   | 4.4791   | 5.8360   | 0.3818  | 0.162186 |
| <i>Lsm1</i>          | chr8:25785590-25803975    | 14.5578  | 12.7330  | -0.1932 | 0.086886 |
| <i>Nxn</i>           | chr11:76257197-76399140   | 5.0954   | 4.4020   | -0.2110 | 0.046282 |
| <i>AF357399</i>      | chr7:28351507-28351632    | 5.7474   | 9.0322   | 0.6522  | 0.095799 |
| <i>Otulin</i>        | chr15:27605918-27630693   | 44.8455  | 48.7248  | 0.1197  | 0.190130 |
| <i>Gpr15</i>         | chr16:58717434-58718724   | 11.4922  | 9.6181   | -0.2568 | 0.143606 |
| <i>Cdca2</i>         | chr14:67676330-67715841   | 1.6096   | 2.0037   | 0.3160  | 0.325957 |
| <i>Polr2d</i>        | chr18:31789158-31796642   | 19.5624  | 16.5415  | -0.2420 | 0.121352 |
| <i>Dtx2</i>          | chr5:135994799-136032872  | 3.3369   | 2.8668   | -0.2191 | 0.141035 |
| <i>Gm16272</i>       | chr6:39584091-39592784    | 5.3046   | 3.7352   | -0.5060 | 0.016635 |
| <i>Atg7</i>          | chr6:114643096-114860614  | 8.4401   | 7.5656   | -0.1578 | 0.044788 |
| <i>Athl1</i>         | chr7:140941390-140947664  | 9.0631   | 8.0267   | -0.1752 | 0.029109 |
| <i>Birc5</i>         | chr11:117849250-117855743 | 2.2019   | 2.8861   | 0.3904  | 0.332184 |
| <i>Tax1bp3</i>       | chr11:73177082-73183162   | 0.3715   | 0.2163   | -0.7804 | 0.126550 |
| <i>Cpsf3</i>         | chr12:21286296-21315056   | 62.7434  | 66.3084  | 0.0797  | 0.055273 |
| <i>Tspan9</i>        | chr6:127961395-128143594  | 5.0797   | 5.8912   | 0.2138  | 0.261650 |
| <i>2510046G10Rik</i> | chr7:126649222-126649570  | 14.3656  | 10.9830  | -0.3874 | 0.118794 |
| <i>Ccdc66</i>        | chr14:27482411-27508460   | 14.8770  | 16.1542  | 0.1188  | 0.064526 |
| <i>Ube2c</i>         | chr2:164769897-164778822  | 0.9383   | 1.4371   | 0.6150  | 0.290163 |
| <i>Edem1</i>         | chr6:108828640-108859356  | 54.3087  | 48.8730  | -0.1521 | 0.107225 |
| <i>Il18r1</i>        | chr1:40465551-40500854    | 26.3626  | 30.1246  | 0.1924  | 0.357029 |
| <i>Gm13347</i>       | chr2:19677250-19678603    | 0.5675   | 0.9310   | 0.7142  | 0.169554 |
| <i>Aldh4a1</i>       | chr4:139622865-139649690  | 6.1434   | 5.3394   | -0.2024 | 0.098613 |
| <i>Pard6b</i>        | chr2:168081003-168101203  | 1.0018   | 0.7313   | -0.4542 | 0.118272 |
| <i>Ghrl</i>          | chr6:113716118-113719880  | 5.3155   | 3.9343   | -0.4341 | 0.032367 |
| <i>Traj30</i>        | chr14:54189865-54189924   | 31.7168  | 18.9504  | -0.7430 | 0.292289 |
| <i>Ltv1</i>          | chr10:13178639-13193137   | 35.9668  | 39.6688  | 0.1413  | 0.189384 |
| <i>Ccdc28a</i>       | chr10:18213675-18234998   | 7.8071   | 8.6565   | 0.1490  | 0.159789 |
| <i>Adarb1</i>        | chr10:77290725-77418270   | 0.0546   | 0.0897   | 0.7165  | 0.058241 |
| <i>Ube2g2</i>        | chr10:77622274-77645993   | 18.9305  | 20.5901  | 0.1212  | 0.124295 |

|                      |                           |          |          |         |          |
|----------------------|---------------------------|----------|----------|---------|----------|
| <i>Cpm</i>           | chr10:117629499-117687352 | 12.5209  | 11.1662  | -0.1652 | 0.116260 |
| <i>Gm26847</i>       | chr10:128230589-128232790 | 1.2373   | 1.6015   | 0.3722  | 0.073776 |
| <i>3010026O09Rik</i> | chr11:50174443-50200115   | 3.0030   | 3.5809   | 0.2539  | 0.084129 |
| <i>Zfp2</i>          | chr11:50898711-50916165   | 0.3517   | 0.4936   | 0.4888  | 0.147045 |
| <i>1700016P03Rik</i> | chr11:75172559-75177633   | 12.1745  | 14.0651  | 0.2083  | 0.137629 |
| <i>NA</i>            | chr11:86317265-86317487   | 4.9825   | 3.0573   | -0.7046 | 0.043871 |
| <i>Bzrap1</i>        | chr11:87760540-87785928   | 0.5400   | 0.7607   | 0.4945  | 0.420683 |
| <i>Armc7</i>         | chr11:115475666-115490467 | 37.4350  | 40.8190  | 0.1249  | 0.192971 |
| <i>Recql5</i>        | chr11:115892594-115933477 | 5.5064   | 4.8735   | -0.1762 | 0.091588 |
| <i>Tmc6</i>          | chr11:117765987-117782198 | 37.8350  | 33.8621  | -0.1600 | 0.142567 |
| <i>Endov</i>         | chr11:119491346-119511437 | 5.2933   | 4.6109   | -0.1991 | 0.122291 |
| <i>Rptoros</i>       | chr11:119820811-119834365 | 1.0450   | 1.5360   | 0.5556  | 0.150022 |
| <i>lah1</i>          | chr12:21316391-21323605   | 20.8425  | 17.8888  | -0.2205 | 0.090325 |
| <i>Gm22058</i>       | chr12:69930903-69931213   | 7.5227   | 9.7946   | 0.3807  | 0.080756 |
| <i>Akap5</i>         | chr12:76324890-76334153   | 0.6101   | 0.7869   | 0.3672  | 0.281535 |
| <i>Ptpn21</i>        | chr12:98676740-98737405   | 0.7592   | 0.9784   | 0.3659  | 0.214363 |
| <i>Setd3</i>         | chr12:108106430-108179314 | 15.5818  | 17.0668  | 0.1313  | 0.215003 |
| <i>Trgv2</i>         | chr13:19336572-19337026   | 7.0764   | 10.4049  | 0.5562  | 0.272946 |
| <i>NA</i>            | chr13:23544051-23545055   | 38.6378  | 42.5259  | 0.1383  | 0.218496 |
| <i>Nkd2</i>          | chr13:73818533-73847631   | 2.1706   | 2.6213   | 0.2722  | 0.278845 |
| <i>Sdha</i>          | chr13:74322253-74350280   | 65.8374  | 60.7017  | -0.1172 | 0.030511 |
| <i>Hmgcr</i>         | chr13:96648966-96670936   | 18.5580  | 16.3184  | -0.1855 | 0.145325 |
| <i>Fgl2</i>          | chr5:21372641-21378374    | 1.6126   | 2.7095   | 0.7486  | 0.228585 |
| <i>Gm9970</i>        | chr5:31240674-31241232    | 4.4745   | 5.8055   | 0.3757  | 0.049976 |
| <i>Fosl2</i>         | chr5:32136471-32157831    | 3.6070   | 3.0670   | -0.2340 | 0.164495 |
| <i>Lyar</i>          | chr5:38220469-38234306    | 15.4647  | 17.3299  | 0.1643  | 0.208604 |
| <i>Klh5</i>          | chr5:65107567-65168188    | 2.4076   | 2.8571   | 0.2470  | 0.272586 |
| <i>Abcg3</i>         | chr5:104935056-104982718  | 19.5206  | 17.4199  | -0.1643 | 0.090413 |
| <i>NA</i>            | chr5:105215698-105239533  | 4.6278   | 6.6022   | 0.5126  | 0.187439 |
| <i>Pgam5</i>         | chr5:110259129-110269913  | 25.7911  | 23.0379  | -0.1629 | 0.066917 |
| <i>Tpcn1</i>         | chr5:120534159-120588613  | 8.6638   | 7.4215   | -0.2233 | 0.192627 |
| <i>Chchd3</i>        | chr6:32790975-33060260    | 35.1869  | 40.0861  | 0.1881  | 0.255773 |
| <i>Gprin3</i>        | chr6:59352460-59426290    | 16.0411  | 17.6574  | 0.1385  | 0.209733 |
| <i>Mogs</i>          | chr6:83115495-83118898    | 48.6228  | 44.3365  | -0.1331 | 0.042552 |
| <i>1700019G17Rik</i> | chr6:85899050-85904884    | 2.9988   | 2.3448   | -0.3550 | 0.213022 |
| <i>Rpn1</i>          | chr6:88084472-88105304    | 45.9740  | 41.6512  | -0.1425 | 0.049253 |
| <i>Tpt1-ps3</i>      | chr6:99877746-99878433    | 2.8453   | 1.6783   | -0.7615 | 0.236015 |
| <i>Itpr1</i>         | chr6:108213117-108551109  | 25.1359  | 22.4731  | -0.1615 | 0.166659 |
| <i>Irak2</i>         | chr6:113638466-113695009  | 3.0891   | 3.4711   | 0.1682  | 0.032805 |
| <i>8430419L09Rik</i> | chr6:135197976-135244955  | 4.3865   | 3.8658   | -0.1823 | 0.045290 |
| <i>BC049715</i>      | chr6:136828842-136840536  | 6.3535   | 5.2378   | -0.2786 | 0.012826 |
| <i>St8sia1</i>       | chr6:142821544-142964452  | 7.0232   | 7.7576   | 0.1435  | 0.266158 |
| <i>Tmem86b</i>       | chr7:4628041-4630482      | 11.4435  | 9.5877   | -0.2553 | 0.134232 |
| <i>9330104G04Rik</i> | chr7:16871353-16874886    | 2.2887   | 1.7387   | -0.3965 | 0.160779 |
| <i>Pou2f2</i>        | chr7:25091908-25159922    | 1.3589   | 1.7319   | 0.3499  | 0.242613 |
| <i>NA</i>            | chr7:29155679-29156918    | 2.3152   | 3.0235   | 0.3851  | 0.146944 |
| <i>E130304I02Rik</i> | chr7:35802592-35803027    | 3.2945   | 2.1466   | -0.6180 | 0.038625 |
| <i>Bcat2</i>         | chr7:45570152-45589710    | 6.0447   | 5.2898   | -0.1925 | 0.061043 |
| <i>Tmem86a</i>       | chr7:47050639-47054776    | 0.7270   | 1.0570   | 0.5400  | 0.151779 |
| <i>Tspan4</i>        | chr7:141475239-141493427  | 3.0179   | 2.4434   | -0.3047 | 0.080079 |
| <i>Gm17491</i>       | chr8:22480290-22483330    | 15.9928  | 13.9336  | -0.1989 | 0.123779 |
| <i>Mast3</i>         | chr8:70778116-70792433    | 21.2774  | 18.9726  | -0.1654 | 0.147672 |
| <i>Ciapin1</i>       | chr8:94819817-94838358    | 6.3718   | 5.6820   | -0.1653 | 0.054575 |
| <i>Gm5913</i>        | chr8:97427711-97429110    | 0.9218   | 0.5273   | -0.8057 | 0.160886 |
| <i>Slc7a6os</i>      | chr8:106200437-106210933  | 35.9082  | 32.0027  | -0.1661 | 0.082570 |
| <i>Aprt</i>          | chr8:122574636-122576907  | 52.3901  | 58.7087  | 0.1643  | 0.198912 |
| <i>Scn2b</i>         | chr9:45117875-45130070    | 0.1280   | 0.2086   | 0.7044  | 0.047247 |
| <i>Etfa</i>          | chr9:55454507-55512243    | 11.9718  | 10.4405  | -0.1974 | 0.052281 |
| <i>Scaper</i>        | chr9:55549882-55919605    | 16.5031  | 18.4556  | 0.1613  | 0.238632 |
| <i>Tspan3</i>        | chr9:56135884-56161070    | 9.9278   | 11.1523  | 0.1678  | 0.123181 |
| <i>Mapk6</i>         | chr9:75369061-75410005    | 8.5359   | 9.3479   | 0.1311  | 0.216515 |
| <i>Slc17a5</i>       | chr9:78536487-78588041    | 4.2137   | 3.5698   | -0.2392 | 0.102839 |
| <i>Cspg5</i>         | chr9:110243782-110262575  | 0.2723   | 0.4143   | 0.6058  | 0.181025 |
| <i>Armcx1</i>        | chrX:134717962-134721917  | 0.9141   | 0.6545   | -0.4820 | 0.155378 |
| <i>Gm24447</i>       | chr15:93234362-93234700   | 5.1413   | 3.2891   | -0.6444 | 0.088406 |
| <i>Trac</i>          | chr14:54220520-54223097   | 616.7117 | 668.3274 | 0.1160  | 0.201553 |
| <i>Gm5801</i>        | chr14:56010535-56011351   | 0.6494   | 1.1333   | 0.8035  | 0.190928 |
| <i>Ppp2r2a</i>       | chr14:67014056-67072471   | 9.4923   | 10.9921  | 0.2116  | 0.335554 |
| <i>3300005D01Rik</i> | chr17:5798656-5803240     | 1.1167   | 1.7191   | 0.6223  | 0.213506 |
| <i>Prdm9</i>         | chr17:15543078-15564354   | 2.1785   | 2.5516   | 0.2281  | 0.211923 |
| <i>Rhbdl1</i>        | chr17:25834468-25837157   | 5.2933   | 4.3635   | -0.2787 | 0.073324 |

|                      |                           |          |          |         |          |
|----------------------|---------------------------|----------|----------|---------|----------|
| <i>Ndufa11</i>       | chr17:56717761-56724248   | 7.6417   | 6.6222   | -0.2066 | 0.055753 |
| <i>Prepl</i>         | chr17:85063476-85090267   | 5.8367   | 5.0680   | -0.2037 | 0.087038 |
| <i>Dnm1l</i>         | chr16:16312234-16359030   | 34.6284  | 37.2993  | 0.1072  | 0.193465 |
| <i>Eij2b5</i>        | chr16:20498816-20509955   | 32.0909  | 28.8928  | -0.1515 | 0.061031 |
| <i>Z610015P09Rik</i> | chr16:43889799-43964314   | 3.7985   | 4.2201   | 0.1518  | 0.048644 |
| <i>Fkbp2</i>         | chr19:6977740-6980461     | 13.1488  | 16.2226  | 0.3031  | 0.266135 |
| <i>Sgms1</i>         | chr19:32122726-32389714   | 3.9890   | 4.3262   | 0.1171  | 0.069549 |
| <i>Col17a1</i>       | chr19:47646343-47692094   | 0.1870   | 0.2703   | 0.5320  | 0.036103 |
| <i>Unc50</i>         | chr1:37430169-37439124    | 26.0959  | 23.4806  | -0.1524 | 0.006359 |
| <i>Cd55</i>          | chr1:130439026-130462744  | 20.6975  | 22.8526  | 0.1429  | 0.265866 |
| <i>Aspm</i>          | chr1:139454772-139494090  | 1.3886   | 1.9797   | 0.5117  | 0.242730 |
| <i>Ccdc181</i>       | chr1:164275584-164287847  | 5.6163   | 6.4743   | 0.2051  | 0.132566 |
| <i>Mgst3</i>         | chr1:167371965-167393841  | 2.2063   | 1.5166   | -0.5408 | 0.159884 |
| <i>Cdc23</i>         | chr18:34630950-34651735   | 10.6441  | 9.6822   | -0.1366 | 0.033300 |
| <i>Cxc5</i>          | chr18:35829817-35861687   | 12.0459  | 10.3921  | -0.2130 | 0.121114 |
| <i>Gm26672</i>       | chr18:37746558-37768242   | 0.2699   | 0.3651   | 0.4355  | 0.046657 |
| <i>Aldh7a1</i>       | chr18:56509686-56572951   | 1.0383   | 0.8286   | -0.3254 | 0.028005 |
| <i>Dctn4</i>         | chr18:60526220-60558762   | 23.7480  | 25.2281  | 0.0872  | 0.019465 |
| <i>Abtb2</i>         | chr2:103566309-103718423  | 27.2963  | 24.6322  | -0.1482 | 0.127444 |
| <i>Pak6</i>          | chr2:118663302-118698020  | 0.2037   | 0.3071   | 0.5922  | 0.115336 |
| <i>AV039307</i>      | chr2:120850704-120866689  | 6.3677   | 5.3131   | -0.2612 | 0.021960 |
| <i>Duox1</i>         | chr2:122315671-122347972  | 0.1702   | 0.2717   | 0.6750  | 0.232485 |
| <i>Polr1b</i>        | chr2:129100994-129126594  | 13.9571  | 12.5943  | -0.1482 | 0.084412 |
| <i>A730017L22Rik</i> | chr2:130873058-130906396  | 2.4940   | 2.8211   | 0.1778  | 0.147678 |
| <i>Rbm12</i>         | chr2:156091957-156111978  | 19.8007  | 17.7683  | -0.1562 | 0.108327 |
| <i>Bicap</i>         | chr2:157556361-157571274  | 4.3031   | 4.9726   | 0.2086  | 0.189770 |
| <i>Pdcd10</i>        | chr3:75516489-75556856    | 17.4954  | 19.4934  | 0.1560  | 0.209118 |
| <i>S100a1</i>        | chr3:90511033-90514392    | 2.0247   | 2.9911   | 0.5630  | 0.169125 |
| <i>Sec22b</i>        | chr3:97901189-97923276    | 10.2330  | 11.0814  | 0.1149  | 0.084616 |
| <i>Dram2</i>         | chr3:106547692-106574845  | 9.7849   | 10.8070  | 0.1433  | 0.128134 |
| <i>Gm27008</i>       | chr3:106934381-107093894  | 3.9483   | 3.1759   | -0.3141 | 0.096229 |
| <i>Pde5a</i>         | chr3:122729157-122859374  | 0.3543   | 0.4794   | 0.4362  | 0.188254 |
| <i>Ccbl2</i>         | chr3:142701050-142744910  | 0.7223   | 0.9960   | 0.4636  | 0.127122 |
| <i>9530052C20Rik</i> | chr3:142882494-142894644  | 1.0435   | 0.7712   | -0.4363 | 0.090425 |
| <i>Odf2l</i>         | chr3:145118588-145153915  | 3.9668   | 3.3132   | -0.2597 | 0.081067 |
| <i>Polr1e</i>        | chr4:45018582-45036565    | 9.5719   | 8.4992   | -0.1715 | 0.038572 |
| <i>Slc25a51</i>      | chr4:45395922-45408766    | 19.3686  | 17.5977  | -0.1383 | 0.054335 |
| <i>9530080O11Rik</i> | chr4:95959714-95967655    | 0.6369   | 0.9222   | 0.5342  | 0.079018 |
| <i>Dhcr24</i>        | chr4:106561037-106589113  | 5.5197   | 4.7656   | -0.2119 | 0.104013 |
| <i>Ndc1</i>          | chr4:107367783-107416346  | 4.8680   | 5.4100   | 0.1523  | 0.151714 |
| <i>Zfp362</i>        | chr4:128773087-128806045  | 3.3116   | 4.0984   | 0.3075  | 0.280449 |
| <i>Txlna</i>         | chr4:129626077-129641065  | 21.3217  | 19.4593  | -0.1319 | 0.023169 |
| <i>Ube2j2</i>        | chr4:155943830-155959604  | 7.9240   | 7.0630   | -0.1660 | 0.043214 |
| <i>Sdf4</i>          | chr4:155992871-156013610  | 45.5602  | 48.7036  | 0.0963  | 0.124244 |
| <i>Sgip1</i>         | chr4:102741296-102973628  | 0.0672   | 0.1080   | 0.6836  | 0.047972 |
| <i>H60b</i>          | chr10:22158585-22288849   | 4.8789   | 6.7906   | 0.4770  | 0.387889 |
| <i>Gm22716</i>       | chr5:110677123-110677230  | 9.8835   | 5.4068   | -0.8702 | 0.154082 |
| <i>Mustn1</i>        | chr14:30879256-30881608   | 1.3846   | 1.9316   | 0.4803  | 0.099409 |
| <i>Arf2</i>          | chr11:103966738-103985337 | 6.9444   | 7.6899   | 0.1471  | 0.072856 |
| <i>Mapt</i>          | chr11:104231389-104332090 | 0.2351   | 0.3325   | 0.5005  | 0.177767 |
| <i>Sap30bp</i>       | chr11:115933281-115966725 | 16.9279  | 18.2051  | 0.1049  | 0.121039 |
| <i>Cdk13</i>         | chr13:17715961-17805097   | 44.7676  | 47.5187  | 0.0860  | 0.138212 |
| <i>Gm15911</i>       | chr13:55602181-55604783   | 10.4203  | 8.6813   | -0.2634 | 0.039024 |
| <i>Fam172a</i>       | chr13:77708689-78166238   | 20.4289  | 18.3945  | -0.1513 | 0.062330 |
| <i>Rps23</i>         | chr13:90923130-90924942   | 6.8097   | 5.4275   | -0.3273 | 0.029508 |
| <i>Elovl7</i>        | chr13:108214403-108287105 | 3.8861   | 3.2876   | -0.2413 | 0.200202 |
| <i>Gnpda2</i>        | chr5:69573107-69592337    | 8.6576   | 9.4200   | 0.1218  | 0.138603 |
| <i>Gm9754</i>        | chr5:118065359-118069710  | 1.6165   | 1.2601   | -0.3594 | 0.117745 |
| <i>Chchd4</i>        | chr6:91464275-91473423    | 9.2499   | 7.8238   | -0.2416 | 0.046760 |
| <i>Isoc2b</i>        | chr7:4844958-4866193      | 5.2754   | 6.3680   | 0.2716  | 0.200029 |
| <i>Lrrk1</i>         | chr7:66226911-66388350    | 1.0244   | 1.7999   | 0.8131  | 0.160790 |
| <i>Trim34a</i>       | chr7:104244456-104340693  | 21.3382  | 23.9828  | 0.1686  | 0.311604 |
| <i>1700029J07Rik</i> | chr8:45953605-45975252    | 1.9914   | 2.3615   | 0.2459  | 0.030236 |
| <i>Nudt7</i>         | chr8:114133556-114152312  | 5.0660   | 4.3441   | -0.2218 | 0.072605 |
| <i>Slc35a2</i>       | chrX:7884040-7894492      | 6.7371   | 5.9136   | -0.1881 | 0.041955 |
| <i>Nup155</i>        | chr15:8109312-8159857     | 14.6632  | 13.3325  | -0.1373 | 0.047548 |
| <i>Epsti1</i>        | chr14:77904238-78002656   | 259.9543 | 293.6504 | 0.1758  | 0.304352 |
| <i>9330136K24Rik</i> | chr17:21528193-21535878   | 1.0913   | 0.7526   | -0.5361 | 0.178208 |
| <i>Gtf2f1</i>        | chr17:57003404-57011288   | 52.7833  | 58.2431  | 0.1420  | 0.250046 |
| <i>B230307C23Rik</i> | chr16:97997322-98010000   | 12.3300  | 10.0659  | -0.2927 | 0.206208 |
| <i>Rusc1</i>         | chr3:89083980-89093363    | 11.6384  | 12.8641  | 0.1445  | 0.221707 |

|                      |                           |          |          |         |          |
|----------------------|---------------------------|----------|----------|---------|----------|
| <i>Tstd2</i>         | chr4:46114745-46138694    | 11.2577  | 10.1180  | -0.1540 | 0.056547 |
| <i>Foxd2</i>         | chr4:114906279-114908898  | 0.5938   | 0.3921   | -0.5989 | 0.086463 |
| <i>Gm26461</i>       | chr9:88553235-88553534    | 4.1505   | 2.3990   | -0.7909 | 0.176198 |
| <i>Nrros</i>         | chr16:32142784-32165594   | 34.8841  | 31.0315  | -0.1688 | 0.151701 |
| <i>Rap1a</i>         | chr3:105727266-105801330  | 31.0457  | 33.4803  | 0.1089  | 0.151676 |
| <i>1700047K16Rik</i> | chr11:58322987-58324439   | 8.8180   | 7.0253   | -0.3279 | 0.181159 |
| <i>Tanc2</i>         | chr11:105589985-105929304 | 0.0602   | 0.0893   | 0.5700  | 0.073991 |
| <i>Gm20900</i>       | chr13:120304193-120304655 | 4.3472   | 2.9323   | -0.5681 | 0.117730 |
| <i>Rfc2</i>          | chr5:134582689-134598328  | 32.6979  | 29.0352  | -0.1714 | 0.090716 |
| <i>Mob1a</i>         | chr6:83326015-83343776    | 102.9495 | 92.1427  | -0.1600 | 0.131004 |
| <i>Klhdc4</i>        | chr8:121796312-121829569  | 7.2363   | 6.4627   | -0.1631 | 0.002932 |
| <i>Tnf</i>           | chr17:35199380-35202007   | 13.1480  | 15.0140  | 0.1915  | 0.237626 |
| <i>Gpr155</i>        | chr2:73341505-73386572    | 2.1063   | 2.4851   | 0.2386  | 0.265568 |
| <i>Gm10964</i>       | chr3:103739365-103746376  | 11.4869  | 17.1656  | 0.5795  | 0.235957 |
| <i>Gm26542</i>       | chr11:50237008-50288839   | 2.6795   | 2.0131   | -0.4125 | 0.089658 |
| <i>Galnt10</i>       | chr11:57645441-57787514   | 23.7470  | 21.7500  | -0.1267 | 0.048255 |
| <i>Ssh1</i>          | chr5:113937093-113993894  | 2.3312   | 2.8202   | 0.2748  | 0.346163 |
| <i>Fbxo28</i>        | chr1:182313101-182341606  | 26.0663  | 23.8709  | -0.1269 | 0.021013 |
| <i>Zfp661</i>        | chr2:127574661-127587094  | 2.6141   | 2.9788   | 0.1884  | 0.145840 |
| <i>Hmha1</i>         | chr10:80016652-80031472   | 358.5009 | 328.5451 | -0.1259 | 0.068566 |
| <i>Ahsa2</i>         | chr11:23487881-23498030   | 20.5385  | 18.0580  | -0.1857 | 0.170049 |
| <i>A530017D24Rik</i> | chr11:61864567-61868058   | 6.0409   | 6.8941   | 0.1906  | 0.221979 |
| <i>Zfp652</i>        | chr11:95712672-95835115   | 16.2934  | 14.9065  | -0.1284 | 0.072490 |
| <i>Fbxo33</i>        | chr12:59200654-59219725   | 17.2579  | 15.2946  | -0.1742 | 0.143959 |
| <i>Mgat2</i>         | chr12:69184157-69186772   | 48.8107  | 52.2568  | 0.0984  | 0.094668 |
| <i>Jdp2</i>          | chr12:85599104-85639878   | 0.7863   | 1.1809   | 0.5868  | 0.297041 |
| <i>Batf</i>          | chr12:85686668-85709087   | 34.1978  | 38.0535  | 0.1541  | 0.201702 |
| <i>Rslcan18</i>      | chr13:67096612-67114028   | 1.2902   | 0.9862   | -0.3877 | 0.073386 |
| <i>Zfp458</i>        | chr13:67254917-67269068   | 1.5582   | 1.8948   | 0.2822  | 0.186948 |
| <i>Sae1</i>          | chr7:16327052-16387797    | 35.9147  | 32.0221  | -0.1655 | 0.094670 |
| <i>Plekkg2</i>       | chr7:28359603-28372599    | 13.5621  | 12.2008  | -0.1526 | 0.119466 |
| <i>Gm6939</i>        | chr7:126687458-126690034  | 2.2169   | 1.5480   | -0.5181 | 0.043573 |
| <i>Rnf40</i>         | chr7:127588697-127603605  | 40.8326  | 37.5956  | -0.1192 | 0.029577 |
| <i>Gm22579</i>       | chr9:15316675-15316808    | 54.5214  | 43.7821  | -0.3165 | 0.116859 |
| <i>Nptn</i>          | chr9:58582239-58657955    | 20.8626  | 22.4978  | 0.1089  | 0.221814 |
| <i>Nop9</i>          | chr14:55745692-55755500   | 13.3475  | 11.9925  | -0.1544 | 0.051303 |
| <i>Lrch1</i>         | chr14:74754673-74947877   | 17.3065  | 18.7541  | 0.1159  | 0.199507 |
| <i>Dirc2</i>         | chr16:35694061-35769356   | 10.0023  | 9.0144   | -0.1500 | 0.042298 |
| <i>Gsk3b</i>         | chr16:38089000-38246084   | 9.1627   | 9.9681   | 0.1216  | 0.232961 |
| <i>Rbm20</i>         | chr19:53677305-53867080   | 0.1647   | 0.2439   | 0.5671  | 0.180140 |
| <i>Tagln2</i>        | chr1:172500046-172507380  | 79.2008  | 87.9881  | 0.1518  | 0.267800 |
| <i>1110008P14Rik</i> | chr2:32377096-32381938    | 7.9135   | 8.7936   | 0.1521  | 0.121404 |
| <i>Prr5l</i>         | chr2:101714284-101883027  | 0.1891   | 0.3152   | 0.7375  | 0.294423 |
| <i>Gm14341</i>       | chr2:180954463-180966812  | 1.5209   | 2.2598   | 0.5712  | 0.093109 |
| <i>Fabp5</i>         | chr3:10012547-10016607    | 0.7285   | 0.9296   | 0.3517  | 0.030984 |
| <i>Car14</i>         | chr3:95897767-95904691    | 1.2968   | 1.6424   | 0.3408  | 0.116284 |
| <i>Padi2</i>         | chr4:140906343-140952586  | 17.3968  | 15.6662  | -0.1512 | 0.074454 |
| <i>Thnsl2</i>        | chr6:71128165-71144346    | 0.6869   | 0.4604   | -0.5771 | 0.028426 |
| <i>Snord14c</i>      | chr9:40803582-40803668    | 51.4607  | 32.5185  | -0.6622 | 0.342948 |
| <i>Ccr7</i>          | chr11:99144195-99155077   | 205.2432 | 186.2700 | -0.1399 | 0.121091 |
| <i>Gm11696</i>       | chr11:109354777-109363654 | 7.1259   | 6.2054   | -0.1996 | 0.065336 |
| <i>Socs3</i>         | chr11:117966078-117970047 | 62.2264  | 68.6571  | 0.1419  | 0.300891 |
| <i>Lrrn3</i>         | chr12:41451672-41485751   | 1.0927   | 1.4864   | 0.4438  | 0.261767 |
| <i>2410131K14Rik</i> | chr5:118245226-118266093  | 4.8422   | 4.3278   | -0.1620 | 0.002629 |
| <i>Cox19</i>         | chr5:139336188-139345233  | 3.1992   | 2.6281   | -0.2837 | 0.164499 |
| <i>Ccdc77</i>        | chr6:120324322-120364374  | 4.3229   | 3.7593   | -0.2015 | 0.099008 |
| <i>Flt3l</i>         | chr7:45131187-45136432    | 23.5389  | 25.0634  | 0.0905  | 0.088217 |
| <i>Trav16n</i>       | chr14:53351089-53351621   | 11.0198  | 13.6030  | 0.3038  | 0.069275 |
| <i>Runx2</i>         | chr17:44495986-44814797   | 1.0278   | 1.6521   | 0.6847  | 0.265000 |
| <i>Dak</i>           | chr19:10592199-10604258   | 3.9171   | 3.2695   | -0.2607 | 0.063393 |
| <i>Dnajc5</i>        | chr2:181520484-181555133  | 37.1968  | 34.1738  | -0.1223 | 0.036906 |
| <i>Stxbp3a</i>       | chr3:108793175-108840526  | 13.0330  | 14.0205  | 0.1054  | 0.125169 |
| <i>Ipo13</i>         | chr4:117894485-117914999  | 3.9507   | 3.3690   | -0.2298 | 0.148993 |
| <i>Elmsan1</i>       | chr12:84149175-84218881   | 17.2851  | 15.3675  | -0.1697 | 0.180838 |
| <i>Dnajc25</i>       | chr4:58995061-59025573    | 1.3012   | 1.5454   | 0.2482  | 0.092659 |
| <i>Mir7-1</i>        | chr13:58392778-58392886   | 15.0773  | 9.8166   | -0.6191 | 0.124959 |
| <i>Slc27a6</i>       | chr18:58556256-58612773   | 0.9285   | 1.2111   | 0.3834  | 0.118329 |
| <i>Il2ra</i>         | chr2:11642791-11693191    | 0.2210   | 0.3123   | 0.4987  | 0.036538 |
| <i>Tsnax</i>         | chr8:125012996-125034192  | 33.7723  | 29.6287  | -0.1888 | 0.148334 |
| <i>Snora69</i>       | chrX:37082911-37083042    | 8.3322   | 4.5790   | -0.8637 | 0.192993 |
| <i>Snora61</i>       | chr4:132310239-132310369  | 57.6570  | 44.7045  | -0.3671 | 0.191250 |



|                      |                           |          |           |         |          |
|----------------------|---------------------------|----------|-----------|---------|----------|
| <i>Dus1l</i>         | chr11:120789200-120796403 | 18.5759  | 16.8130   | -0.1438 | 0.050664 |
| <i>Tmem177</i>       | chr1:119907889-119913208  | 3.5626   | 4.0475    | 0.1841  | 0.130917 |
| <i>Urgcp</i>         | chr11:5713416-5762376     | 8.6595   | 7.7241    | -0.1649 | 0.101288 |
| <i>BC065397</i>      | chrX:136741823-136803364  | 3.7571   | 4.2197    | 0.1675  | 0.043176 |
| <i>Cox14</i>         | chr15:99725617-99728136   | 28.1396  | 22.4889   | -0.3234 | 0.227447 |
| <i>Rbm14</i>         | chr19:4800568-4811634     | 17.1821  | 15.2481   | -0.1723 | 0.142751 |
| <i>Ddx50</i>         | chr10:62616022-62651218   | 34.8664  | 38.1542   | 0.1300  | 0.199186 |
| <i>Mlh1</i>          | chr9:111228227-111271608  | 13.3568  | 14.5243   | 0.1209  | 0.188357 |
| <i>Atp6v1b2</i>      | chr8:69088645-69113711    | 12.3835  | 11.0214   | -0.1681 | 0.118532 |
| <i>Klh15</i>         | chrX:94234598-94277724    | 3.0873   | 2.7640    | -0.1596 | 0.008565 |
| <i>Pfkm</i>          | chr15:98092588-98132447   | 4.9455   | 4.2797    | -0.2086 | 0.046363 |
| <i>Cd48</i>          | chr1:171682008-171705258  | 200.5771 | 177.4591  | -0.1767 | 0.185638 |
| <i>Grin3b</i>        | chr10:79970714-79977190   | 1.1932   | 0.9290    | -0.3611 | 0.050811 |
| <i>Tcp11l2</i>       | chr10:84576625-84614359   | 40.6579  | 36.9389   | -0.1384 | 0.085786 |
| <i>Fam228b</i>       | chr12:4746215-4769267     | 0.6640   | 0.4688    | -0.5023 | 0.046426 |
| <i>Agk</i>           | chr6:40325477-40396762    | 6.2822   | 5.4158    | -0.2141 | 0.042178 |
| <i>Zfp850</i>        | chr7:27988711-28008416    | 16.1035  | 13.9580   | -0.2063 | 0.165236 |
| <i>E530011L2Rik</i>  | chr9:121757206-121759788  | 1.1891   | 0.8759    | -0.4411 | 0.012420 |
| <i>Fcrl1</i>         | chr3:87376386-87392133    | 0.2695   | 0.4906    | 0.8643  | 0.286042 |
| <i>Rfesd</i>         | chr13:76001534-76018712   | 7.0295   | 8.0399    | 0.1938  | 0.258400 |
| <i>Crcp</i>          | chr5:130029289-130060789  | 18.8196  | 21.0787   | 0.1636  | 0.218598 |
| <i>2810417H13Rik</i> | chr9:65890236-65903266    | 2.9127   | 3.6799    | 0.3373  | 0.362986 |
| <i>Cdo1</i>          | chr18:46713204-46728342   | 2.0802   | 1.5720    | -0.4041 | 0.074502 |
| <i>Rfx5</i>          | chr3:94954074-94961561    | 9.3425   | 10.0899   | 0.1110  | 0.168866 |
| <i>Sumf2</i>         | chr5:129846989-129864050  | 6.4499   | 5.4911    | -0.2322 | 0.113075 |
| <i>Nphp3</i>         | chr9:104002543-104043730  | 0.2517   | 0.3650    | 0.5360  | 0.303200 |
| <i>5730405O15Rik</i> | chrX:13042014-13045297    | 4.1135   | 3.3529    | -0.2949 | 0.121722 |
| <i>Pbk</i>           | chr14:65805836-65817822   | 0.9879   | 1.4662    | 0.5696  | 0.272225 |
| <i>Lgl2</i>          | chr11:115824048-115855780 | 7.8068   | 6.8188    | -0.1952 | 0.176851 |
| <i>Epb4.1l2</i>      | chr10:25359797-25523519   | 15.3263  | 16.5961   | 0.1148  | 0.160946 |
| <i>Mip</i>           | chr10:128225837-128231812 | 0.3933   | 0.6328    | 0.6860  | 0.158116 |
| <i>Brd9</i>          | chr13:73937837-73960894   | 38.4356  | 41.2781   | 0.1029  | 0.154383 |
| <i>Phf14</i>         | chr6:11907808-12081197    | 24.1476  | 25.9269   | 0.1026  | 0.135893 |
| <i>Cmtr2</i>         | chr8:110217959-110224489  | 7.8465   | 6.7374    | -0.2199 | 0.139584 |
| <i>Tagln</i>         | chr9:45929627-45936058    | 3.9194   | 4.8069    | 0.2945  | 0.241599 |
| <i>Scn11a</i>        | chr9:119753762-119825456  | 0.4645   | 0.3365    | -0.4648 | 0.109724 |
| <i>Atg101</i>        | chr15:101284300-101290934 | 18.0182  | 15.4376   | -0.2230 | 0.121512 |
| <i>Gm26447</i>       | chr16:23111300-23111429   | 209.6404 | 133.0843  | -0.6556 | 0.208073 |
| <i>2210411M09Rik</i> | chr1:180952063-180958149  | 7.4661   | 5.9690    | -0.3229 | 0.037477 |
| <i>Mocos</i>         | chr18:24653690-24701556   | 0.5856   | 0.8087    | 0.4657  | 0.163028 |
| <i>Cd44</i>          | chr2:102811140-102901665  | 8.7136   | 11.4846   | 0.3984  | 0.216257 |
| <i>Sec24b</i>        | chr3:129982758-130061553  | 8.5770   | 10.0303   | 0.2258  | 0.383649 |
| <i>Ccdc86</i>        | chr19:10941480-10949266   | 5.3048   | 4.5493    | -0.2216 | 0.120910 |
| <i>Col10a1</i>       | chr10:34389980-34397085   | 1.9359   | 2.5428    | 0.3934  | 0.369190 |
| <i>Tuba3a</i>        | chr6:125278273-125286042  | 1.1265   | 1.5696    | 0.4785  | 0.160344 |
| <i>Eef1d</i>         | chr15:75894795-75909556   | 35.0656  | 40.3803   | 0.2036  | 0.317047 |
| <i>Klc3</i>          | chr7:19394436-19404104    | 5.5939   | 4.6937    | -0.2531 | 0.166139 |
| <i>Mpc2</i>          | chr1:165461036-165481214  | 7.3057   | 6.2916    | -0.2156 | 0.144772 |
| <i>Clock</i>         | chr5:76212176-76304548    | 10.9667  | 11.9979   | 0.1297  | 0.260715 |
| <i>Rimbp3</i>        | chr16:17208134-17213971   | 0.1849   | 0.2704    | 0.5481  | 0.119269 |
| <i>Ltn1</i>          | chr16:87376650-87432606   | 20.8009  | 18.4528   | -0.1728 | 0.174722 |
| <i>2010012O05Rik</i> | chr19:46689905-46703382   | 2.0977   | 2.5377    | 0.2747  | 0.071332 |
| <i>Gm26869</i>       | chr2:178023807-178028736  | 0.3592   | 0.5163    | 0.5236  | 0.207203 |
| <i>Ttc21b</i>        | chr2:66184326-66256617    | 3.3627   | 2.9854    | -0.1717 | 0.054664 |
| <i>Tsyp13</i>        | chr2:153222379-153225441  | 9.8382   | 8.7676    | -0.1662 | 0.027795 |
| <i>Syne3</i>         | chr12:104929948-105009809 | 4.2660   | 3.7346    | -0.1919 | 0.083368 |
| <i>Cfp</i>           | chrX:20925453-20931555    | 2.4178   | 1.8755    | -0.3664 | 0.098262 |
| <i>Mrpl32</i>        | chr13:14610300-14613037   | 41.9219  | 47.6313   | 0.1842  | 0.258796 |
| <i>Qk</i>            | chr17:10206470-10319361   | 7.9063   | 8.6142    | 0.1237  | 0.172405 |
| <i>Smarca5-ps</i>    | chr4:145464203-145467420  | 0.3780   | 0.2326    | -0.7006 | 0.103411 |
| <i>1700020I14Rik</i> | chr2:119594296-119607502  | 38.4006  | 34.8076   | -0.1417 | 0.108253 |
| <i>Thg1l</i>         | chr11:45946842-45955494   | 7.2137   | 8.0424    | 0.1569  | 0.148015 |
| <i>Tex14</i>         | chr11:87405064-87555823   | 0.3263   | 0.4455    | 0.4491  | 0.125890 |
| <i>Clasp2</i>        | chr9:113812585-113919697  | 18.9296  | 16.7774   | -0.1741 | 0.169019 |
| <i>Rcbtb1</i>        | chr14:59201208-59237265   | 27.3411  | 24.8608   | -0.1372 | 0.085974 |
| <i>Gm20460</i>       | chr17:34614483-34627349   | 5.7831   | 4.8274    | -0.2606 | 0.078459 |
| <i>Gm23973</i>       | chr7:103271549-103271870  | 18.4377  | 14.4838   | -0.3482 | 0.114849 |
| <i>Map2k3</i>        | chr11:60932032-60952811   | 4.5157   | 3.7716    | -0.2598 | 0.177021 |
| <i>Scarna13</i>      | chr12:105031074-105031349 | 916.9365 | 1002.7551 | 0.1291  | 0.275744 |
| <i>9130221H12Rik</i> | chr7:252228686-25230257   | 34.3983  | 37.8850   | 0.1393  | 0.238168 |
| <i>Heatr3</i>        | chr8:88137854-88172027    | 14.9667  | 13.2894   | -0.1715 | 0.135656 |

|                      |                           |           |           |         |          |
|----------------------|---------------------------|-----------|-----------|---------|----------|
| <i>Il2rg</i>         | chrX:101264377-101268255  | 180.1720  | 191.1527  | 0.0854  | 0.197086 |
| <i>Nxt2</i>          | chrX:142226769-142239692  | 2.0754    | 2.4576    | 0.2439  | 0.150820 |
| <i>Gm26590</i>       | chr14:52197501-52213852   | 20.0424   | 17.6397   | -0.1842 | 0.093758 |
| <i>Gm9574</i>        | chr17:36137187-36139105   | 2.4420    | 1.7139    | -0.5108 | 0.124754 |
| <i>Cpa3</i>          | chr3:20215616-20242181    | 1.7410    | 1.2722    | -0.4526 | 0.044834 |
| <i>Yars</i>          | chr4:129189759-129219607  | 8.9274    | 8.1286    | -0.1352 | 0.004023 |
| <i>Ptp4a2</i>        | chr4:129811218-129850003  | 85.2301   | 93.0774   | 0.1271  | 0.241282 |
| <i>Zbtb48</i>        | chr4:152019773-152027671  | 7.2115    | 6.2348    | -0.2100 | 0.118947 |
| <i>Pusl1</i>         | chr4:155887878-155891781  | 19.9408   | 17.7599   | -0.1671 | 0.117371 |
| <i>Hace1</i>         | chr10:45577828-45712345   | 3.7269    | 4.0688    | 0.1266  | 0.152966 |
| <i>Gm14798</i>       | chrX:94028853-94099304    | 12.1467   | 10.3828   | -0.2264 | 0.091463 |
| <i>Gm20522</i>       | chr17:35122737-35126440   | 4.6386    | 5.7174    | 0.3016  | 0.085425 |
| <i>Cox7a2l</i>       | chr17:83501918-83514333   | 168.1915  | 215.7347  | 0.3592  | 0.184166 |
| <i>Sell</i>          | chr1:164062075-164080785  | 728.5112  | 767.5929  | 0.0754  | 0.164100 |
| <i>Emc4</i>          | chr2:112363010-112368027  | 16.6341   | 14.3675   | -0.2113 | 0.104503 |
| <i>Prex1</i>         | chr2:166566341-166713832  | 40.3680   | 35.1547   | -0.1995 | 0.251178 |
| <i>Zkscan5</i>       | chr5:145204561-145221750  | 4.9771    | 5.6622    | 0.1861  | 0.264530 |
| <i>Ndufb3</i>        | chr1:58586383-58595964    | 32.1041   | 37.1951   | 0.2124  | 0.278669 |
| <i>Siah2</i>         | chr3:58674937-58692400    | 4.5822    | 3.9151    | -0.2270 | 0.094659 |
| <i>Gm26397</i>       | chr8:126944846-126944980  | 128.7247  | 189.5769  | 0.5585  | 0.230271 |
| <i>Ngfrap1</i>       | chrX:136270252-136271978  | 13.5308   | 16.2131   | 0.2609  | 0.284394 |
| <i>Dclre1a</i>       | chr19:56529160-56548222   | 1.1284    | 1.2994    | 0.2036  | 0.024442 |
| <i>9930021J03Rik</i> | chr19:29714401-29806009   | 8.2824    | 9.1256    | 0.1399  | 0.267520 |
| <i>Mir1949</i>       | chr18:35554491-35554632   | 22.1610   | 14.6463   | -0.5975 | 0.243844 |
| <i>Ssb</i>           | chr2:69861561-69871846    | 136.1685  | 149.5767  | 0.1355  | 0.273163 |
| <i>Nudt16</i>        | chr9:105129337-105131805  | 22.3712   | 19.6928   | -0.1840 | 0.139456 |
| <i>Slc26a6</i>       | chr9:108854036-108912558  | 4.2305    | 3.4698    | -0.2860 | 0.202510 |
| <i>Dusp2</i>         | chr2:127336158-127338376  | 54.2386   | 47.1878   | -0.2009 | 0.180542 |
| <i>Ect2l</i>         | chr10:18129021-18210890   | 0.4726    | 0.3072    | -0.6215 | 0.059527 |
| <i>Cdk19</i>         | chr10:40349307-40483818   | 19.0025   | 20.2881   | 0.0944  | 0.154848 |
| <i>Lrrc75a</i>       | chr11:62604883-62648523   | 4.0417    | 4.6511    | 0.2026  | 0.123071 |
| <i>Taf15</i>         | chr11:83473085-83506743   | 11.4550   | 12.5006   | 0.1260  | 0.168075 |
| <i>Galr2</i>         | chr11:116280938-116283938 | 0.4446    | 0.2737    | -0.6999 | 0.067606 |
| <i>Ctsl</i>          | chr13:64363213-64370306   | 6.2155    | 5.2845    | -0.2341 | 0.078507 |
| <i>Phkg1</i>         | chr5:129863420-129898549  | 0.4258    | 0.2893    | -0.5575 | 0.000186 |
| <i>2610001J05Rik</i> | chr6:13867734-13871518    | 5.3811    | 4.5418    | -0.2447 | 0.142236 |
| <i>Trbv12-1</i>      | chr6:41113566-41114067    | 88.4241   | 74.7638   | -0.2421 | 0.212301 |
| <i>Suclg2</i>        | chr6:95474133-95718837    | 13.2019   | 14.4898   | 0.1343  | 0.133675 |
| <i>Casc1</i>         | chr6:145174833-145210970  | 1.7675    | 1.4962    | -0.2404 | 0.076555 |
| <i>4632433K11Rik</i> | chr7:5034117-5035246      | 3.8141    | 4.8180    | 0.3371  | 0.246815 |
| <i>Strn4</i>         | chr7:16815888-16840931    | 15.1482   | 13.7246   | -0.1424 | 0.111965 |
| <i>Akt2</i>          | chr7:27591551-27640826    | 9.1144    | 9.8329    | 0.1095  | 0.194062 |
| <i>Gm26762</i>       | chr7:34224754-34230236    | 8.6506    | 7.8077    | -0.1479 | 0.033203 |
| <i>Gm15880</i>       | chr7:80636016-80644384    | 0.7073    | 0.9786    | 0.4684  | 0.298885 |
| <i>Rplp2</i>         | chr7:141447369-141451585  | 151.0640  | 117.5820  | -0.3615 | 0.180970 |
| <i>Pet100</i>        | chr8:3621550-3624231      | 25.2882   | 29.6248   | 0.2283  | 0.313372 |
| <i>Neto2</i>         | chr8:85636587-85690973    | 1.1457    | 1.3416    | 0.2277  | 0.086266 |
| <i>Fuk</i>           | chr8:110882462-110902459  | 3.7511    | 3.2757    | -0.1955 | 0.008472 |
| <i>Tyk2</i>          | chr9:21104068-21127346    | 24.0894   | 21.8664   | -0.1397 | 0.088836 |
| <i>Rpl4</i>          | chr9:64173386-64178562    | 1693.1453 | 1918.6426 | 0.1804  | 0.309145 |
| <i>Tmed3</i>         | chr9:89699202-89705043    | 18.0242   | 20.0181   | 0.1514  | 0.171391 |
| <i>Chst2</i>         | chr9:95400928-95407270    | 0.4449    | 0.6337    | 0.5104  | 0.309547 |
| <i>Gm20661</i>       | chr9:107983057-107995007  | 4.4608    | 3.5227    | -0.3406 | 0.230633 |
| <i>Gm8806</i>        | chrX:80533744-80535151    | 1.2872    | 1.7821    | 0.4693  | 0.187833 |
| <i>Gm26617</i>       | chrX:94793102-94798237    | 1.7127    | 2.0315    | 0.2463  | 0.227832 |
| <i>Zfr</i>           | chr15:12117830-12185683   | 30.7612   | 32.8952   | 0.0968  | 0.140206 |
| <i>Matn2</i>         | chr15:34306679-34436242   | 1.2569    | 0.9972    | -0.3338 | 0.045237 |
| <i>Slurp1</i>        | chr15:74726643-74728026   | 3.3328    | 4.5832    | 0.4596  | 0.156641 |
| <i>Ints9</i>         | chr14:64950044-65039835   | 8.0477    | 9.0137    | 0.1635  | 0.226567 |
| <i>Gm16278</i>       | chr17:25919088-25935745   | 3.1522    | 2.5855    | -0.2859 | 0.056718 |
| <i>Ppp1r10</i>       | chr17:35916433-35932281   | 20.7625   | 22.1561   | 0.0937  | 0.132459 |
| <i>Parl</i>          | chr16:20279819-20302387   | 9.6887    | 8.6563    | -0.1625 | 0.051106 |
| <i>Cbr1</i>          | chr16:93607836-93610505   | 21.4444   | 18.1877   | -0.2376 | 0.187035 |
| <i>Pygm</i>          | chr19:6384398-6398459     | 1.8946    | 2.2558    | 0.2517  | 0.124219 |
| <i>Gnaq</i>          | chr19:16132830-16387463   | 0.4971    | 0.6449    | 0.3756  | 0.253552 |
| <i>Gm340</i>         | chr19:41582369-41586536   | 11.3402   | 12.7333   | 0.1672  | 0.325429 |
| <i>Mir26b</i>        | chr1:74394309-74394394    | 21.5405   | 28.5437   | 0.4061  | 0.064971 |
| <i>Ctse</i>          | chr1:131638305-131675503  | 6.2572    | 7.1540    | 0.1932  | 0.302106 |
| <i>Nr1i3</i>         | chr1:171213969-171220701  | 6.6374    | 5.8396    | -0.1848 | 0.095004 |
| <i>Cobll1</i>        | chr2:65088338-65239403    | 0.6708    | 0.8966    | 0.4187  | 0.299980 |
| <i>Chmp4b</i>        | chr2:154651704-154694785  | 88.4841   | 97.4290   | 0.1389  | 0.278978 |

|                  |                           |          |          |         |          |
|------------------|---------------------------|----------|----------|---------|----------|
| <i>Sla2</i>      | chr2:156872456-156887192  | 55.1691  | 50.3781  | -0.1311 | 0.047453 |
| <i>Rps3a1</i>    | chr3:86137939-86142702    | 140.0333 | 116.7025 | -0.2629 | 0.307929 |
| <i>Slc16a4</i>   | chr3:107291229-107312115  | 2.4634   | 1.9957   | -0.3038 | 0.191613 |
| <i>Sh3bgrl3</i>  | chr4:134127405-134128789  | 235.6206 | 271.5924 | 0.2050  | 0.337170 |
| <i>Ddost</i>     | chr4:138304729-138312628  | 56.1654  | 60.2609  | 0.1015  | 0.212323 |
| <i>Znf41-ps</i>  | chr4:145825236-145829942  | 2.1908   | 2.6231   | 0.2598  | 0.158134 |
| <i>Gm26983</i>   | chr1:7136198-7136586      | 1.7875   | 2.8446   | 0.6703  | 0.200794 |
| <i>Gk5</i>       | chr9:96119361-96184627    | 1.9282   | 1.6368   | -0.2364 | 0.107557 |
| <i>Slc38a2</i>   | chr15:96687393-96699698   | 55.5772  | 49.9269  | -0.1547 | 0.149375 |
| <i>Pcnx13</i>    | chr19:5664634-5688908     | 12.6236  | 10.9434  | -0.2061 | 0.242327 |
| <i>R3hdm1</i>    | chr1:128103305-128237735  | 11.1826  | 12.3857  | 0.1474  | 0.303979 |
| <i>Polr2a</i>    | chr11:69733996-69758637   | 11.8014  | 13.5365  | 0.1979  | 0.407136 |
| <i>Txndc17</i>   | chr11:72207546-72210015   | 32.1066  | 36.0071  | 0.1654  | 0.264877 |
| <i>Ict1</i>      | chr11:115403751-115412674 | 19.0608  | 21.1849  | 0.1524  | 0.267345 |
| <i>Tdrp</i>      | chr8:13952008-13975032    | 47.2871  | 42.2854  | -0.1613 | 0.141295 |
| <i>H2-Oa</i>     | chr17:34092339-34095234   | 18.9757  | 16.3337  | -0.2163 | 0.169098 |
| <i>Lrrfip1</i>   | chr1:90998726-91128944    | 67.9591  | 72.0528  | 0.0844  | 0.141265 |
| <i>Srfbp1</i>    | chr18:52465692-52490738   | 28.8016  | 31.6989  | 0.1383  | 0.191146 |
| <i>Gm20544</i>   | chr18:75365331-75367088   | 2.2145   | 3.1464   | 0.5067  | 0.241994 |
| <i>Ralgps1</i>   | chr2:33133420-33371486    | 1.7728   | 1.5083   | -0.2331 | 0.136818 |
| <i>Gm23201</i>   | chr2:167064997-167065086  | 42.1637  | 53.6022  | 0.3463  | 0.226861 |
| <i>Tcea2</i>     | chr2:181680309-181688071  | 12.7440  | 13.8779  | 0.1230  | 0.180813 |
| <i>Bcl9</i>      | chr3:97203661-97228846    | 0.8370   | 0.9715   | 0.2149  | 0.056822 |
| <i>Gabbr2</i>    | chr4:33062998-33095865    | 3.9056   | 4.5261   | 0.2127  | 0.168732 |
| <i>Snora44</i>   | chr4:132309940-132310069  | 42.3075  | 51.8242  | 0.2927  | 0.214438 |
| <i>Psme3</i>     | chr11:101316212-101323537 | 35.7212  | 38.4397  | 0.1058  | 0.193383 |
| <i>Gm10390</i>   | chr5:120121102-120139263  | 3.0831   | 3.3999   | 0.1411  | 0.157405 |
| <i>Gcdh</i>      | chr8:84886392-84893921    | 12.1746  | 10.5957  | -0.2004 | 0.140367 |
| <i>Ssr4</i>      | chrX:73787027-73790830    | 23.9101  | 25.8968  | 0.1152  | 0.199884 |
| <i>Eml3</i>      | chr19:8929693-8941563     | 42.4636  | 38.3920  | -0.1454 | 0.139794 |
| <i>Ccdc17</i>    | chr4:116596653-116600266  | 3.6280   | 4.1988   | 0.2108  | 0.189425 |
| <i>Gm13251</i>   | chr4:146449022-146470292  | 1.0154   | 1.3229   | 0.3816  | 0.331904 |
| <i>Gm20648</i>   | chr9:80073428-80073756    | 3.4643   | 5.0827   | 0.5530  | 0.143705 |
| <i>Adk</i>       | chr14:21052573-21448568   | 15.8443  | 17.5343  | 0.1462  | 0.198454 |
| <i>Senp5</i>     | chr16:31962505-32003287   | 9.9054   | 8.7942   | -0.1717 | 0.105523 |
| <i>Pdcl</i>      | chr2:37350073-37359332    | 14.6796  | 15.8728  | 0.1128  | 0.122362 |
| <i>Txnip</i>     | chr3:96557956-96561883    | 291.2447 | 312.4151 | 0.1012  | 0.233308 |
| <i>Lin54</i>     | chr5:100441917-100500639  | 7.1535   | 7.9456   | 0.1515  | 0.239644 |
| <i>Gm15446</i>   | chr5:109923399-109943936  | 5.7637   | 5.0157   | -0.2005 | 0.101232 |
| <i>Nkiras1</i>   | chr14:18271135-18283942   | 5.9913   | 5.2657   | -0.1863 | 0.118243 |
| <i>S100a6</i>    | chr3:90612893-90614414    | 30.8484  | 36.2079  | 0.2311  | 0.355014 |
| <i>Myeov2</i>    | chr1:92637144-92641985    | 18.8881  | 15.6906  | -0.2676 | 0.253876 |
| <i>Alpk1</i>     | chr3:127670398-127780527  | 0.1708   | 0.1011   | -0.7560 | 0.214501 |
| <i>Samd3</i>     | chr10:26229706-26272172   | 9.8222   | 13.3292  | 0.4405  | 0.202342 |
| <i>Abhd11</i>    | chr5:135009151-135012175  | 16.7197  | 17.9914  | 0.1058  | 0.066443 |
| <i>Tbx21</i>     | chr11:97098070-97115331   | 12.5662  | 15.2305  | 0.2774  | 0.351597 |
| <i>Mmp24</i>     | chr2:155775341-155818366  | 2.6691   | 3.0453   | 0.1902  | 0.158131 |
| <i>Abcg2</i>     | chr6:58584522-58692869    | 1.5535   | 1.9004   | 0.2908  | 0.248131 |
| <i>Myc</i>       | chr15:61985390-61990374   | 29.8654  | 34.1389  | 0.1929  | 0.327612 |
| <i>Nit2</i>      | chr16:57156670-57167332   | 16.9491  | 14.7813  | -0.1974 | 0.096167 |
| <i>Asah2</i>     | chr19:31984653-32061469   | 1.0696   | 1.2780   | 0.2569  | 0.118764 |
| <i>Zrsr1</i>     | chr11:22972004-22976496   | 10.1937  | 11.3492  | 0.1549  | 0.264258 |
| <i>Mgmt2</i>     | chr11:62648663-62666354   | 3.7762   | 3.2727   | -0.2065 | 0.084093 |
| <i>Mettl23</i>   | chr11:116843277-116854263 | 47.2568  | 49.9322  | 0.0794  | 0.086035 |
| <i>Gzmk</i>      | chr13:113171607-113225908 | 2.9358   | 7.1455   | 1.2833  | 0.182559 |
| <i>Med21</i>     | chr6:146642546-146650602  | 12.2588  | 13.6608  | 0.1562  | 0.185192 |
| <i>Gm17077</i>   | chr7:30955824-30958004    | 16.1630  | 12.5894  | -0.3605 | 0.127938 |
| <i>NA</i>        | chr7:104355397-104358646  | 0.3596   | 0.5646   | 0.6509  | 0.256705 |
| <i>Rps13</i>     | chr7:116331506-116334190  | 9.0557   | 7.0987   | -0.3513 | 0.157842 |
| <i>Fbxl12</i>    | chr9:20618117-20644767    | 9.2955   | 10.0255  | 0.1091  | 0.124234 |
| <i>Efnb1</i>     | chrX:99136129-99148991    | 0.2665   | 0.4034   | 0.5982  | 0.149333 |
| <i>Tmtc4</i>     | chr14:122918970-122984035 | 2.9836   | 3.3032   | 0.1468  | 0.157211 |
| <i>Ndufv2</i>    | chr17:66078794-66101559   | 34.4999  | 38.3637  | 0.1531  | 0.267784 |
| <i>Gm15537</i>   | chr16:3927788-3929357     | 5.9302   | 4.2669   | -0.4749 | 0.145854 |
| <i>Gm15530</i>   | chr16:38685314-38685869   | 1.2495   | 2.0203   | 0.6932  | 0.112357 |
| <i>Gm14097</i>   | chr2:132694431-132698523  | 2.4387   | 1.5622   | -0.6426 | 0.044260 |
| <i>Bcl10</i>     | chr3:145924377-145934283  | 30.9539  | 27.8933  | -0.1502 | 0.055658 |
| <i>Ppp1r3f</i>   | chrX:7557295-7605381      | 6.3240   | 5.3837   | -0.2322 | 0.225053 |
| <i>Rgcc</i>      | chr14:79288755-79301645   | 52.6306  | 43.0041  | -0.2914 | 0.270656 |
| <i>Mrps35</i>    | chr6:147042763-147070903  | 6.7020   | 7.2942   | 0.1221  | 0.187547 |
| <i>Rpl31-ps8</i> | chr15:90764245-90764679   | 36.8902  | 29.6653  | -0.3145 | 0.263090 |

|                      |                           |          |          |         |          |
|----------------------|---------------------------|----------|----------|---------|----------|
| <i>Tmem62</i>        | chr2:120977016-121007852  | 8.5782   | 7.6467   | -0.1658 | 0.036953 |
| <i>Orm2</i>          | chr4:63362448-63365878    | 8.6050   | 6.9473   | -0.3087 | 0.126869 |
| <i>Psip1</i>         | chr4:83455679-83486459    | 55.2160  | 60.0469  | 0.1210  | 0.242771 |
| <i>Nsun5</i>         | chr5:135369952-135376805  | 10.1556  | 9.0127   | -0.1722 | 0.074006 |
| <i>Ppp4c</i>         | chr7:126785906-126792471  | 103.7335 | 93.3233  | -0.1526 | 0.108892 |
| <i>Hsd12</i>         | chr4:59581562-59618689    | 19.2059  | 20.5082  | 0.0947  | 0.046592 |
| <i>Pknox1</i>        | chr17:31564748-31607680   | 18.8937  | 17.0100  | -0.1515 | 0.106330 |
| <i>Ncl</i>           | chr1:86344718-86359455    | 34.1289  | 37.5223  | 0.1368  | 0.289506 |
| <i>Slc25a16</i>      | chr10:62920632-62946498   | 6.1108   | 5.3583   | -0.1896 | 0.107854 |
| <i>Gm22771</i>       | chr11:74906108-74906199   | 14.0462  | 8.6844   | -0.6937 | 0.178336 |
| <i>Hspe1-ps3</i>     | chr5:25391607-25391884    | 2.9245   | 4.5732   | 0.6450  | 0.259885 |
| <i>Sub1</i>          | chr15:11981338-11996983   | 47.5157  | 53.9137  | 0.1823  | 0.355028 |
| <i>1700021F05Rik</i> | chr10:43525120-43540994   | 6.5520   | 8.0397   | 0.2952  | 0.308329 |
| <i>Ubap2l</i>        | chr3:89999588-90052475    | 34.2995  | 37.0695  | 0.1120  | 0.238688 |
| <i>Gm26581</i>       | chr10:22212652-22217241   | 0.6250   | 0.8130   | 0.3795  | 0.180966 |
| <i>Gm2a</i>          | chr11:55098114-55113029   | 28.9304  | 31.4510  | 0.1205  | 0.264108 |
| <i>Gphn</i>          | chr12:78226654-78684767   | 7.1166   | 7.8777   | 0.1466  | 0.181082 |
| <i>Zfp58</i>         | chr13:67490166-67500555   | 14.9209  | 13.0893  | -0.1889 | 0.137239 |
| <i>Gm6404</i>        | chr13:116153780-116154134 | 16.4775  | 12.4478  | -0.4046 | 0.253814 |
| <i>Gpx1</i>          | chr9:108339079-108340338  | 94.7258  | 108.2935 | 0.1931  | 0.323472 |
| <i>Hmgb3</i>         | chrX:71555917-71560676    | 1.0049   | 1.3812   | 0.4590  | 0.232451 |
| <i>Xlr4b</i>         | chrX:73214332-73222453    | 5.6539   | 4.9182   | -0.2011 | 0.034123 |
| <i>Spcs1</i>         | chr14:30999825-31001672   | 30.8106  | 26.4992  | -0.2175 | 0.197081 |
| <i>Rnf39</i>         | chr17:36942917-36947986   | 1.3829   | 1.7524   | 0.3416  | 0.063510 |
| <i>Chmp2b</i>        | chr16:65539132-65562697   | 17.0785  | 15.2128  | -0.1669 | 0.063566 |
| <i>Pcif1</i>         | chr2:164879303-164894454  | 27.5906  | 25.2359  | -0.1287 | 0.112580 |
| <i>Tubb2a</i>        | chr13:34074300-34078008   | 4.9452   | 3.9076   | -0.3398 | 0.207868 |
| <i>Gcc2</i>          | chr10:58255496-58305599   | 11.5134  | 12.3656  | 0.1030  | 0.187386 |
| <i>BC037034</i>      | chr5:138259657-138264046  | 27.9740  | 25.6545  | -0.1249 | 0.043052 |
| <i>6820431F20Rik</i> | chr8:20262612-20297546    | 0.7389   | 0.6053   | -0.2878 | 0.066502 |
| <i>Commd6</i>        | chr14:101633765-101640686 | 16.8366  | 14.5794  | -0.2077 | 0.132179 |
| <i>Sp2</i>           | chr11:96953339-96982959   | 3.3110   | 3.9735   | 0.2631  | 0.331185 |
| <i>Nars2</i>         | chr7:96951504-97064761    | 5.8890   | 5.2002   | -0.1795 | 0.085373 |
| <i>Utp23</i>         | chr15:51877428-51884614   | 7.0108   | 5.9986   | -0.2250 | 0.143746 |
| <i>Atg14</i>         | chr14:47540893-47568434   | 5.5166   | 4.8192   | -0.1950 | 0.059809 |
| <i>Sap30</i>         | chr8:57482706-57487860    | 5.3789   | 6.3893   | 0.2484  | 0.150811 |
| <i>Pmaip1</i>        | chr18:66458603-66465550   | 7.6016   | 8.4539   | 0.1533  | 0.165015 |
| <i>Lrrc45</i>        | chr11:120713924-120721128 | 12.1910  | 10.9029  | -0.1611 | 0.102019 |
| <i>Slc30a5</i>       | chr13:100802648-100833427 | 33.4239  | 30.5522  | -0.1296 | 0.053376 |
| <i>Gnao1</i>         | chr8:93809965-93969388    | 0.1734   | 0.2479   | 0.5155  | 0.121881 |
| <i>Orai3</i>         | chr7:127769814-127775150  | 13.2574  | 14.5082  | 0.1301  | 0.153625 |
| <i>Gm15599</i>       | chr17:5110780-5112119     | 1.2934   | 2.0463   | 0.6618  | 0.285986 |
| <i>Rbbp7</i>         | chrX:162760401-162779092  | 51.3948  | 46.9699  | -0.1299 | 0.043125 |
| <i>Anks3</i>         | chr16:4941414-4964237     | 20.7193  | 18.9019  | -0.1324 | 0.004944 |
| <i>Serac1</i>        | chr17:6042195-6079741     | 2.1979   | 1.8283   | -0.2657 | 0.161191 |
| <i>Mmp23</i>         | chr4:155650654-155653384  | 0.5019   | 0.3218   | -0.6409 | 0.117802 |
| <i>Med13l</i>        | chr5:118560718-118765435  | 13.4325  | 12.1426  | -0.1457 | 0.135079 |
| <i>Dynlt3</i>        | chrX:9654266-9663003      | 7.0408   | 8.2652   | 0.2313  | 0.304880 |
| <i>Nup153</i>        | chr13:46679904-46727940   | 79.0429  | 83.1301  | 0.0727  | 0.176709 |
| <i>Samd9l</i>        | chr6:3372259-3399571      | 204.7181 | 227.6847 | 0.1534  | 0.311425 |
| <i>Itpr1p1</i>       | chr2:127138771-127143442  | 9.0370   | 8.0545   | -0.1661 | 0.094738 |
| <i>Ppp2r5e</i>       | chr12:75450882-75596200   | 6.8767   | 7.6786   | 0.1591  | 0.323489 |
| <i>Rras2</i>         | chr7:114046784-114117781  | 129.7650 | 137.8379 | 0.0871  | 0.190091 |
| <i>Igfbp1</i>        | chrX:100494290-100516125  | 23.2447  | 25.0968  | 0.1106  | 0.202865 |
| <i>Pfkfb2</i>        | chr1:130689042-130729253  | 6.7756   | 6.0968   | -0.1523 | 0.099688 |
| <i>Psd4</i>          | chr2:24367579-24409182    | 65.9373  | 60.5764  | -0.1223 | 0.076556 |
| <i>Al662270</i>      | chr11:83223575-83226604   | 73.8529  | 80.7643  | 0.1291  | 0.241076 |
| <i>Gm17259</i>       | chr13:81778772-81783749   | 2.2905   | 2.6252   | 0.1968  | 0.209541 |
| <i>Ccdc109b</i>      | chr3:129914959-129970206  | 3.2405   | 3.8751   | 0.2580  | 0.028720 |
| <i>Gm16210</i>       | chr10:39752258-39752868   | 3.1310   | 2.2195   | -0.4964 | 0.089386 |
| <i>Zbtb32</i>        | chr7:30589680-30598909    | 3.4065   | 4.1501   | 0.2849  | 0.351825 |
| <i>Gm12867</i>       | chr4:119130291-119131001  | 1.7270   | 2.7021   | 0.6458  | 0.221619 |
| <i>Srsf10</i>        | chr4:135855746-135869908  | 18.9061  | 20.2273  | 0.0975  | 0.165945 |
| <i>Tulp2</i>         | chr7:45486261-45523632    | 0.2904   | 0.4781   | 0.7192  | 0.296524 |
| <i>Myo7a</i>         | chr7:98051059-98119524    | 1.5063   | 1.7687   | 0.2317  | 0.320570 |
| <i>Aco1</i>          | chr4:40143080-40198338    | 8.1315   | 7.3016   | -0.1553 | 0.040239 |
| <i>Nbn</i>           | chr4:15957924-15992589    | 16.9875  | 18.6020  | 0.1310  | 0.185383 |
| <i>Pcgf1</i>         | chr6:83077868-83080855    | 5.5564   | 6.3967   | 0.2032  | 0.133386 |
| <i>Arhgap25</i>      | chr6:87458544-87533259    | 35.5939  | 37.8905  | 0.0902  | 0.224115 |
| <i>Gstp1</i>         | chr19:4035410-4037912     | 14.4962  | 12.0203  | -0.2702 | 0.165437 |
| <i>Tspyl4</i>        | chr10:34297420-34301308   | 23.5987  | 21.3993  | -0.1411 | 0.083806 |

|                      |                           |          |          |         |          |
|----------------------|---------------------------|----------|----------|---------|----------|
| <i>Ppp3r1</i>        | chr11:17159262-17200375   | 30.5193  | 27.6125  | -0.1444 | 0.085944 |
| <i>Fancm</i>         | chr12:65075605-65132058   | 5.2332   | 4.5728   | -0.1946 | 0.193373 |
| <i>Riok1</i>         | chr13:38036988-38061433   | 31.9199  | 34.5835  | 0.1156  | 0.235948 |
| <i>Atp5k</i>         | chr5:108433243-108434448  | 56.3823  | 46.7235  | -0.2711 | 0.258710 |
| <i>Dgkq</i>          | chr5:108646692-108669672  | 10.3107  | 9.2179   | -0.1616 | 0.178302 |
| <i>Slc15a4</i>       | chr5:127595663-127632897  | 6.4993   | 5.8294   | -0.1569 | 0.057549 |
| <i>Slc2a3</i>        | chr6:122727808-122801640  | 12.6695  | 11.4207  | -0.1497 | 0.092662 |
| <i>Klk9</i>          | chr7:43791890-43796756    | 1.4936   | 1.0368   | -0.5266 | 0.183311 |
| <i>Gm24366</i>       | chr8:122471626-122471712  | 35.2287  | 25.6974  | -0.4551 | 0.200335 |
| <i>Pccb</i>          | chr9:100982031-101034898  | 10.0669  | 8.7253   | -0.2063 | 0.176771 |
| <i>6230400D17Rik</i> | chr14:20687235-20703012   | 15.1637  | 17.3271  | 0.1924  | 0.308469 |
| <i>Tbc1d12</i>       | chr19:38836578-38919923   | 1.4464   | 1.6960   | 0.2297  | 0.063967 |
| <i>Cdc73</i>         | chr1:143598796-143702893  | 4.2135   | 4.8621   | 0.2065  | 0.411925 |
| <i>Rbfa</i>          | chr18:80192264-80200658   | 34.3289  | 37.8119  | 0.1394  | 0.273578 |
| <i>Gm12971</i>       | chr4:130758562-130762379  | 4.2197   | 3.1157   | -0.4376 | 0.003690 |
| <i>Gm17084</i>       | chr13:34033062-34037147   | 9.8791   | 8.7283   | -0.1787 | 0.132866 |
| <i>Trbd1</i>         | chr6:41533200-41533212    | 597.4315 | 745.5618 | 0.3196  | 0.322838 |
| <i>Ndufa2</i>        | chr18:36742331-36744557   | 63.3522  | 52.8702  | -0.2609 | 0.256939 |
| <i>P2rx7</i>         | chr5:122643910-122691432  | 2.1522   | 1.7856   | -0.2694 | 0.188559 |
| <i>Afmid</i>         | chr11:117825923-117839908 | 7.0357   | 7.8373   | 0.1557  | 0.251278 |
| <i>Rpp40</i>         | chr13:35893471-35906359   | 2.3735   | 2.6884   | 0.1797  | 0.245728 |
| <i>Fem1b</i>         | chr9:62791831-62811648    | 19.6255  | 17.9818  | -0.1262 | 0.052279 |
| <i>Safb2</i>         | chr17:56560964-56584585   | 13.4327  | 12.0626  | -0.1552 | 0.171237 |
| <i>D2hgdh</i>        | chr1:93825239-93852348    | 6.1049   | 6.7382   | 0.1424  | 0.191691 |
| <i>Tor1a</i>         | chr2:30960626-30967933    | 20.2879  | 21.8992  | 0.1103  | 0.131662 |
| <i>Ccl27a</i>        | chr4:41769466-41774247    | 0.4760   | 0.6703   | 0.4939  | 0.070089 |
| <i>Grwd1</i>         | chr7:45825226-45830944    | 17.8039  | 15.8590  | -0.1669 | 0.083399 |
| <i>Pagr1b</i>        | chr7:127001479-127016484  | 34.0343  | 37.5704  | 0.1426  | 0.151553 |
| <i>Gm15824</i>       | chr5:64190031-64190989    | 2.1228   | 3.1648   | 0.5761  | 0.366626 |
| <i>Bclaf1</i>        | chr10:20312468-20342501   | 105.9557 | 112.6257 | 0.0881  | 0.157427 |
| <i>Smyd4</i>         | chr11:75348432-75405705   | 4.1534   | 3.6252   | -0.1963 | 0.089095 |
| <i>Rpl14</i>         | chr9:120571516-120574653  | 366.7356 | 470.2880 | 0.3588  | 0.195060 |
| <i>Gm26765</i>       | chr10:91149514-91150594   | 26.3765  | 22.7360  | -0.2143 | 0.131385 |
| <i>E4f1</i>          | chr17:24443791-24455311   | 19.2858  | 17.1770  | -0.1671 | 0.135284 |
| <i>Gm21960</i>       | chr3:96412909-96413361    | 4.7021   | 3.3133   | -0.5050 | 0.137758 |
| <i>B3gnt3</i>        | chr8:71691718-71701800    | 2.2027   | 2.7151   | 0.3017  | 0.255916 |
| <i>Rps15a-ps7</i>    | chr2:152185290-152185682  | 2.8895   | 1.8633   | -0.6330 | 0.071579 |
| <i>Katnbl1</i>       | chr2:112379210-112414240  | 5.1778   | 5.8286   | 0.1708  | 0.226395 |
| <i>Tacc3</i>         | chr5:33658127-33678995    | 5.1207   | 6.0745   | 0.2464  | 0.371133 |
| <i>Degs1</i>         | chr1:182275771-182282804  | 39.1724  | 35.9414  | -0.1242 | 0.034132 |
| <i>Smap2</i>         | chr4:120968316-121017247  | 38.4563  | 40.9654  | 0.0912  | 0.201694 |
| <i>Inpp1</i>         | chr7:101822632-101838226  | 0.5395   | 0.7383   | 0.4527  | 0.318690 |
| <i>Der1</i>          | chr15:57869501-57892418   | 32.4144  | 29.2479  | -0.1483 | 0.128870 |
| <i>Lamc1</i>         | chr1:153218921-15332786   | 0.2024   | 0.2796   | 0.4663  | 0.244397 |
| <i>Lman1</i>         | chr18:65980753-66022580   | 7.0569   | 7.6287   | 0.1124  | 0.201927 |
| <i>Fut7</i>          | chr2:25423266-25426374    | 1.6916   | 1.2659   | -0.4182 | 0.184351 |
| <i>Gm8034</i>        | chr19:6044690-6044822     | 5.4829   | 8.1743   | 0.5762  | 0.050063 |
| <i>Cldn12</i>        | chr5:5505014-5514958      | 0.4515   | 0.5887   | 0.3827  | 0.069636 |
| <i>Morc3</i>         | chr16:93832120-93876072   | 60.5637  | 65.7862  | 0.1193  | 0.261723 |
| <i>Acot8</i>         | chr2:164792767-164804882  | 12.8441  | 11.2695  | -0.1887 | 0.116722 |
| <i>Cd6</i>           | chr19:10789340-10830058   | 98.0280  | 104.8638 | 0.0973  | 0.287738 |
| <i>1700120B22Rik</i> | chr10:63243073-63244148   | 21.1141  | 17.7284  | -0.2521 | 0.099044 |
| <i>Cltb</i>          | chr13:54592400-54611344   | 6.5810   | 7.3260   | 0.1547  | 0.266030 |
| <i>Naip5</i>         | chr13:100211738-100246323 | 0.3626   | 0.5180   | 0.5148  | 0.345573 |
| <i>Ly6a</i>          | chr15:74994877-74997634   | 35.8333  | 57.6860  | 0.6869  | 0.215479 |
| <i>Flnb</i>          | chr14:7817956-7951588     | 14.4534  | 13.2078  | -0.1300 | 0.063645 |
| <i>Atp5g3</i>        | chr2:73908446-73911326    | 36.4827  | 32.6103  | -0.1619 | 0.127337 |
| <i>Toporsos</i>      | chr4:40269568-40270940    | 18.4464  | 15.6292  | -0.2391 | 0.202051 |
| <i>Zc3h12a</i>       | chr4:125118422-125127840  | 10.8171  | 9.5393   | -0.1814 | 0.168455 |
| <i>Gga3</i>          | chr11:115584254-115604051 | 8.4308   | 7.5498   | -0.1592 | 0.138166 |
| <i>Ssc4d</i>         | chr5:135960210-135974531  | 0.5684   | 0.7859   | 0.4676  | 0.214853 |
| <i>Fdxacb1</i>       | chr9:50768235-50773348    | 3.9794   | 4.4550   | 0.1629  | 0.116344 |
| <i>Mx1</i>           | chr16:97447034-97462907   | 8.7856   | 15.2526  | 0.7958  | 0.219208 |
| <i>Smad4</i>         | chr18:73639008-73703780   | 47.4408  | 50.2794  | 0.0838  | 0.140569 |
| <i>Ncoa5</i>         | chr2:165000356-165034867  | 13.0820  | 11.8662  | -0.1407 | 0.067473 |
| <i>Osbpl3</i>        | chr6:50293329-50456201    | 1.4108   | 2.1624   | 0.6162  | 0.267867 |
| <i>Sirt6</i>         | chr10:81621784-81627797   | 5.9767   | 5.2290   | -0.1928 | 0.080404 |
| <i>Atad3aos</i>      | chr4:155761177-155769264  | 2.8680   | 2.2514   | -0.3493 | 0.131742 |
| <i>Vbp1</i>          | chrX:75514298-75534942    | 37.4200  | 32.5125  | -0.2028 | 0.250109 |
| <i>Gm4895</i>        | chr10:22153279-22154416   | 0.6112   | 1.0119   | 0.7274  | 0.197225 |
| <i>Anp32-ps</i>      | chr11:33394878-33395266   | 2.7205   | 3.8110   | 0.4863  | 0.067191 |

|                      |                           |         |         |         |          |
|----------------------|---------------------------|---------|---------|---------|----------|
| <i>Ccnj1</i>         | chr11:43528783-43586997   | 0.4324  | 0.2835  | -0.6088 | 0.050307 |
| <i>Gm26888</i>       | chr11:119151650-119156994 | 1.8582  | 1.4970  | -0.3118 | 0.181155 |
| <i>Ddx24</i>         | chr12:103407975-103425867 | 60.3824 | 64.4925 | 0.0950  | 0.259254 |
| <i>Plcxd1</i>        | chr5:110099968-110105953  | 6.6659  | 5.8292  | -0.1935 | 0.157343 |
| <i>Rny3</i>          | chr6:47781623-47781725    | 48.2802 | 26.1074 | -0.8870 | 0.247115 |
| <i>Klra3</i>         | chr6:130323288-130337574  | 5.1397  | 6.2162  | 0.2744  | 0.250775 |
| <i>6330408A02Rik</i> | chr7:13258966-13278721    | 1.6608  | 1.8259  | 0.1367  | 0.115334 |
| <i>Calm3</i>         | chr7:16915378-16924114    | 82.6202 | 93.0201 | 0.1710  | 0.337735 |
| <i>Arrdc4</i>        | chr7:68737044-68749241    | 1.1613  | 1.4188  | 0.2889  | 0.206247 |
| <i>Thap11</i>        | chr8:105855102-105856950  | 19.5302 | 17.0403 | -0.1968 | 0.157370 |
| <i>Mthfs</i>         | chr9:89199378-89240226    | 1.5301  | 1.8217  | 0.2517  | 0.047105 |
| <i>Yaf2</i>          | chr15:93284277-93336935   | 10.7605 | 11.9271 | 0.1485  | 0.188895 |
| <i>Gm11100</i>       | chr14:13918443-13949558   | 7.3919  | 6.2881  | -0.2333 | 0.158437 |
| <i>Serpine3</i>      | chr14:62663666-62692243   | 1.0986  | 0.7486  | -0.5534 | 0.127395 |
| <i>Alg1</i>          | chr16:5233620-5244912     | 14.7303 | 13.2535 | -0.1524 | 0.069016 |
| <i>Gm26667</i>       | chr16:84713022-84715242   | 5.5933  | 6.7620  | 0.2738  | 0.316769 |
| <i>Jam2</i>          | chr16:84774122-84825928   | 0.9930  | 0.8065  | -0.3001 | 0.131294 |
| <i>Ms4a1</i>         | chr19:11250602-11266151   | 0.3365  | 0.5917  | 0.8141  | 0.246700 |
| <i>Snrpe</i>         | chr1:133603870-133610291  | 29.6824 | 25.1791 | -0.2374 | 0.280083 |
| <i>Wdr33</i>         | chr18:31804056-31908987   | 25.1377 | 23.2585 | -0.1121 | 0.035960 |
| <i>Gm8731</i>        | chr18:60778982-60779394   | 4.1883  | 2.9705  | -0.4957 | 0.043120 |
| <i>Tnfrsf4</i>       | chr4:156013842-156016612  | 3.8554  | 4.5447  | 0.2373  | 0.129801 |
| <i>Ap2b1</i>         | chr11:83299023-83405035   | 24.8930 | 23.1027 | -0.1077 | 0.015931 |
| <i>Lincpint</i>      | chr6:31165522-31218433    | 14.9641 | 17.1029 | 0.1927  | 0.339152 |
| <i>Srcap</i>         | chr7:127512026-127536376  | 12.3094 | 14.2815 | 0.2144  | 0.426987 |
| <i>Spata13</i>       | chr14:60634000-60764556   | 53.9654 | 56.5324 | 0.0670  | 0.183881 |
| <i>Tubb4a</i>        | chr17:57080065-57087782   | 3.0097  | 2.4257  | -0.3112 | 0.151345 |
| <i>Diexf</i>         | chr1:193104402-193130251  | 10.4113 | 9.4709  | -0.1366 | 0.065557 |
| <i>Ttc17</i>         | chr2:94300766-94406689    | 10.1060 | 10.8785 | 0.1063  | 0.286840 |
| <i>Ahcy</i>          | chr2:155059309-155074497  | 2.1452  | 1.7440  | -0.2987 | 0.106826 |
| <i>Kti12</i>         | chr4:108847856-108849412  | 28.3352 | 24.6931 | -0.1985 | 0.200447 |
| <i>Gm5134</i>        | chr10:75954513-76009591   | 0.7251  | 0.9430  | 0.3790  | 0.132306 |
| <i>Gm9968</i>        | chr16:43345886-43363666   | 1.7716  | 2.1633  | 0.2881  | 0.273050 |
| <i>Zfp446</i>        | chr7:12977847-12984340    | 1.8227  | 2.0640  | 0.1794  | 0.171077 |
| <i>Gm17709</i>       | chr8:121972726-121973822  | 1.4086  | 0.9517  | -0.5657 | 0.139766 |
| <i>Phxr4</i>         | chr9:13431360-13432736    | 6.4935  | 7.8879  | 0.2806  | 0.370365 |
| <i>Ptplad1</i>       | chr9:64986984-65021717    | 41.6370 | 36.9876 | -0.1708 | 0.197917 |
| <i>Gm20680</i>       | chr15:100586095-100592037 | 4.5508  | 6.0236  | 0.4045  | 0.269052 |
| <i>Traj32</i>        | chr14:54186100-54186166   | 40.1260 | 28.9234 | -0.4723 | 0.205318 |
| <i>Eij2ak2</i>       | chr17:78852563-78882573   | 15.0317 | 16.9217 | 0.1709  | 0.383552 |
| <i>Atp8b2</i>        | chr3:89939480-89963508    | 27.0979 | 24.8162 | -0.1269 | 0.143538 |
| <i>Urod</i>          | chr4:116989964-116994413  | 14.6843 | 13.1876 | -0.1551 | 0.058539 |
| <i>Cep162</i>        | chr9:87189572-87255536    | 5.6207  | 6.0350  | 0.1026  | 0.132420 |
| <i>311009E18Rik</i>  | chr1:120121186-120188189  | 2.8990  | 2.3793  | -0.2850 | 0.072976 |
| <i>Nup43</i>         | chr10:7667502-7678881     | 10.0012 | 8.8226  | -0.1809 | 0.102663 |
| <i>Mical1</i>        | chr10:41476313-41487032   | 45.0257 | 47.8890 | 0.0889  | 0.266297 |
| <i>Chst3</i>         | chr10:60181531-60219260   | 0.2207  | 0.3121  | 0.4998  | 0.266466 |
| <i>Eij4ebp2</i>      | chr10:61432496-61452669   | 12.5776 | 14.4854 | 0.2037  | 0.359028 |
| <i>Lss</i>           | chr10:76531587-76557138   | 4.2103  | 3.7754  | -0.1573 | 0.114188 |
| <i>Gadd45b</i>       | chr10:80930090-80932204   | 5.2602  | 6.3543  | 0.2726  | 0.291701 |
| <i>Gatsl3</i>        | chr11:4218224-4222409     | 4.4921  | 5.4688  | 0.2838  | 0.291826 |
| <i>D930048N14Rik</i> | chr11:51650953-51657681   | 1.9242  | 1.5483  | -0.3135 | 0.219598 |
| <i>Ksr1</i>          | chr11:79013439-79146407   | 2.4736  | 2.8597  | 0.2093  | 0.350918 |
| <i>Brip1</i>         | chr11:86058137-86201193   | 1.7251  | 1.9292  | 0.1613  | 0.181041 |
| <i>Slc16a6</i>       | chr11:109450854-109473598 | 10.2810 | 11.2457 | 0.1294  | 0.314044 |
| <i>Gm26520</i>       | chr12:3343815-3357153     | 1.5238  | 0.9734  | -0.6465 | 0.278611 |
| <i>Adck1</i>         | chr12:88360553-88461719   | 10.5811 | 9.4169  | -0.1682 | 0.068136 |
| <i>Pacs2</i>         | chr12:113014507-113074401 | 17.9038 | 16.2431 | -0.1404 | 0.130683 |
| <i>Zkscan8</i>       | chr13:21513221-21531120   | 9.7000  | 10.5289 | 0.1183  | 0.291700 |
| <i>Iars</i>          | chr13:49682099-49734267   | 14.0476 | 15.3873 | 0.1314  | 0.325884 |
| <i>Scfd2</i>         | chr5:74204815-74531747    | 5.9081  | 5.2526  | -0.1697 | 0.198156 |
| <i>Vps33a</i>        | chr5:123528763-123573015  | 16.3505 | 17.3404 | 0.0848  | 0.123049 |
| <i>Rasa4</i>         | chr5:136083915-136111860  | 0.8250  | 1.0406  | 0.3349  | 0.326422 |
| <i>Zfp783</i>        | chr6:47943170-47955913    | 3.7015  | 2.4521  | -0.5941 | 0.144857 |
| <i>Mkrr2</i>         | chr6:115601937-115618670  | 22.2873 | 23.7548 | 0.0920  | 0.091976 |
| <i>Ndufa9</i>        | chr6:126821862-126849144  | 51.8836 | 45.5138 | -0.1890 | 0.186330 |
| <i>Gm26770</i>       | chr6:128356003-128358839  | 6.6887  | 5.7601  | -0.2156 | 0.147089 |
| <i>Golt1b</i>        | chr6:142387220-142403858  | 14.2739 | 12.8968 | -0.1464 | 0.039852 |
| <i>Eml2</i>          | chr7:19176420-19206482    | 3.0651  | 2.5739  | -0.2520 | 0.165867 |
| <i>Gpr4</i>          | chr7:19212537-19224176    | 1.2915  | 1.5641  | 0.2762  | 0.136397 |
| <i>Zfp235</i>        | chr7:24134173-24142266    | 5.0427  | 4.2851  | -0.2349 | 0.150748 |

|                      |                           |          |          |         |          |
|----------------------|---------------------------|----------|----------|---------|----------|
| <i>Paf1</i>          | chr7:28392950-28399388    | 31.7099  | 34.0903  | 0.1044  | 0.236099 |
| <i>Zfp568</i>        | chr7:29983954-30028282    | 5.6298   | 5.0325   | -0.1618 | 0.138234 |
| <i>Tomt</i>          | chr7:101898372-101906359  | 5.5849   | 4.7036   | -0.2478 | 0.172474 |
| <i>NA</i>            | chr7:127559385-127565266  | 9.3238   | 10.6415  | 0.1907  | 0.366862 |
| <i>Ppp2r2d</i>       | chr7:138846078-138883057  | 7.6963   | 8.2674   | 0.1033  | 0.139109 |
| <i>Cd163l1</i>       | chr7:140218266-140231145  | 0.9202   | 1.6895   | 0.8767  | 0.303668 |
| <i>Gm1840</i>        | chr8:5639583-5640996      | 2.3061   | 3.0076   | 0.3831  | 0.288356 |
| <i>Arhgef10</i>      | chr8:14911662-15001085    | 0.6526   | 0.5128   | -0.3479 | 0.243839 |
| <i>Gm6483</i>        | chr8:19682267-19698275    | 1.1194   | 1.3034   | 0.2195  | 0.166628 |
| <i>Ank1</i>          | chr8:22974843-23150497    | 0.0432   | 0.0736   | 0.7708  | 0.166931 |
| <i>Gm16675</i>       | chr8:46730971-46739515    | 6.2987   | 5.1783   | -0.2826 | 0.206033 |
| <i>Gatad2a</i>       | chr8:69907068-69996379    | 28.2838  | 31.2620  | 0.1444  | 0.350002 |
| <i>Gpr97</i>         | chr8:95017691-95045247    | 3.6952   | 3.0242   | -0.2891 | 0.219960 |
| <i>Mthfsd</i>        | chr8:121095011-121108392  | 7.8391   | 7.0159   | -0.1601 | 0.120177 |
| <i>1810008B01Rik</i> | chr8:124305131-124306507  | 12.6498  | 10.8871  | -0.2165 | 0.035401 |
| <i>Alkbh8</i>        | chr9:3335477-3387050      | 8.4823   | 7.6481   | -0.1493 | 0.007368 |
| <i>Aplp2</i>         | chr9:31149556-31211815    | 9.4884   | 10.2906  | 0.1171  | 0.201307 |
| <i>Rcn2</i>          | chr9:56041844-56061882    | 8.0052   | 8.6526   | 0.1122  | 0.193800 |
| <i>Zfp280d</i>       | chr9:72274898-72363770    | 22.2383  | 23.8270  | 0.0995  | 0.186658 |
| <i>Morf4l1</i>       | chr9:90091670-90114820    | 9.0824   | 7.8060   | -0.2185 | 0.182722 |
| <i>Abhd14b</i>       | chr9:106448639-106452915  | 4.6217   | 5.3354   | 0.2072  | 0.102317 |
| <i>Qrich1</i>        | chr9:108517086-108560167  | 81.6659  | 86.5972  | 0.0846  | 0.186076 |
| <i>Wdr6</i>          | chr9:108572312-108578670  | 19.8156  | 17.9590  | -0.1419 | 0.119353 |
| <i>Ccdc51</i>        | chr9:109082495-109093363  | 5.1073   | 4.3511   | -0.2312 | 0.118443 |
| <i>Gm14853</i>       | chrX:105844464-105845013  | 1.0785   | 1.6701   | 0.6309  | 0.056594 |
| <i>Kantr</i>         | chrX:152298499-152327495  | 0.6781   | 0.9902   | 0.5464  | 0.147897 |
| <i>Ankr46</i>        | chr15:36477667-36496791   | 14.4088  | 12.9277  | -0.1565 | 0.067833 |
| <i>Gm26518</i>       | chr15:102455525-102483722 | 5.2907   | 5.8192   | 0.1374  | 0.104884 |
| <i>Traj43</i>        | chr14:54174741-54174798   | 36.8680  | 26.4373  | -0.4798 | 0.131448 |
| <i>Traj24</i>        | chr14:54195637-54195700   | 64.9410  | 50.6795  | -0.3577 | 0.155322 |
| <i>Traj9</i>         | chr14:54209392-54209450   | 98.0705  | 77.5945  | -0.3379 | 0.195446 |
| <i>Mrpl57</i>        | chr14:57826238-57828745   | 16.1827  | 18.1245  | 0.1635  | 0.322077 |
| <i>Rhobtb2</i>       | chr14:69784989-69805530   | 20.2920  | 18.4408  | -0.1380 | 0.128145 |
| <i>Polr3d</i>        | chr14:70438747-70443471   | 15.6975  | 16.9902  | 0.1142  | 0.170944 |
| <i>1600012H06Rik</i> | chr17:14943183-14959570   | 17.5549  | 18.5976  | 0.0832  | 0.021953 |
| <i>Snora78</i>       | chr17:24719675-24719803   | 113.6645 | 94.1128  | -0.2723 | 0.208805 |
| <i>Lmf1</i>          | chr17:25579173-25662826   | 1.6108   | 1.8156   | 0.1727  | 0.300161 |
| <i>Trim39</i>        | chr17:36258872-36272247   | 20.5870  | 18.8527  | -0.1270 | 0.124966 |
| <i>Sh3gl1</i>        | chr17:56016752-56036637   | 53.7552  | 48.8960  | -0.1367 | 0.093221 |
| <i>Trip10</i>        | chr17:57249450-57263697   | 1.1969   | 0.8936   | -0.4215 | 0.144741 |
| <i>Haao</i>          | chr17:83831355-83846790   | 24.7628  | 26.6354  | 0.1052  | 0.025139 |
| <i>Glis2</i>         | chr16:4594712-4624924     | 1.1058   | 0.8819   | -0.3264 | 0.145775 |
| <i>Gm16861</i>       | chr16:4935047-4939585     | 3.1808   | 2.5824   | -0.3007 | 0.080132 |
| <i>Abcc5</i>         | chr16:20331302-20426394   | 10.3621  | 9.4155   | -0.1382 | 0.110472 |
| <i>Urb1</i>          | chr16:90751526-90810413   | 12.4850  | 11.3892  | -0.1325 | 0.101280 |
| <i>Anxa1</i>         | chr19:20373427-20390944   | 0.3670   | 0.5931   | 0.6925  | 0.347557 |
| <i>Rpp30</i>         | chr19:36083715-36104772   | 12.7474  | 14.6801  | 0.2037  | 0.262629 |
| <i>Shoc2</i>         | chr19:53944305-54033268   | 25.4961  | 27.4868  | 0.1085  | 0.205095 |
| <i>Gm26293</i>       | chr1:59692508-59692592    | 17.0864  | 11.7726  | -0.5374 | 0.039703 |
| <i>Ino80dos</i>      | chr1:63114470-63158290    | 8.4204   | 6.8749   | -0.2925 | 0.264727 |
| <i>Pnk1</i>          | chr1:74284929-74353694    | 1.3123   | 1.0741   | -0.2890 | 0.082171 |
| <i>Cab39</i>         | chr1:85793440-85851576    | 99.8815  | 105.7957 | 0.0830  | 0.178715 |
| <i>Hes6</i>          | chr1:91411482-91414038    | 25.2648  | 22.8886  | -0.1425 | 0.046168 |
| <i>Per2</i>          | chr1:91415983-91459330    | 1.0601   | 1.2505   | 0.2383  | 0.202069 |
| <i>Srgap2</i>        | chr1:131285250-131527361  | 6.0703   | 6.6189   | 0.1248  | 0.270118 |
| <i>Ddx59</i>         | chr1:136415270-136440158  | 6.7907   | 7.6246   | 0.1671  | 0.277866 |
| <i>BC003331</i>      | chr1:150361304-150393080  | 10.9815  | 11.9285  | 0.1193  | 0.246255 |
| <i>Prdx6</i>         | chr1:161240111-161251219  | 38.2427  | 33.9767  | -0.1706 | 0.188846 |
| <i>Rrp15</i>         | chr1:186720977-186749358  | 14.7211  | 16.3376  | 0.1503  | 0.274921 |
| <i>Wac</i>           | chr18:7868831-7973547     | 20.4972  | 22.1317  | 0.1107  | 0.237903 |
| <i>Ttc39c</i>        | chr18:12599925-12737050   | 0.1963   | 0.3249   | 0.7267  | 0.341324 |
| <i>Gm23639</i>       | chr18:33795163-33795295   | 15.3910  | 10.8314  | -0.5069 | 0.158807 |
| <i>Sra1</i>          | chr18:36666680-36671196   | 21.3695  | 19.1774  | -0.1561 | 0.121326 |
| <i>Hars2</i>         | chr18:36783007-36792562   | 14.1174  | 12.7556  | -0.1463 | 0.090150 |
| <i>Pcdhgc4</i>       | chr18:37674334-37841873   | 0.3257   | 0.3950   | 0.2783  | 0.308384 |
| <i>Sec11c</i>        | chr18:65800548-65817665   | 38.8884  | 35.0742  | -0.1489 | 0.132968 |
| <i>Il15ra</i>        | chr2:11705286-11733986    | 2.9826   | 3.5226   | 0.2401  | 0.359556 |
| <i>Ankrd16</i>       | chr2:11777875-11790325    | 15.1482  | 13.5493  | -0.1609 | 0.215550 |
| <i>Abi1</i>          | chr2:22940072-23040241    | 48.8368  | 52.7079  | 0.1100  | 0.240210 |
| <i>Gm13427</i>       | chr2:31676363-31688469    | 4.7527   | 3.6504   | -0.3807 | 0.180272 |
| <i>March7</i>        | chr2:60209886-60250676    | 37.2474  | 39.2563  | 0.0758  | 0.133602 |

|                      |                           |          |           |         |          |
|----------------------|---------------------------|----------|-----------|---------|----------|
| <i>Tnks1bp1</i>      | chr2:85048021-85073048    | 4.3693   | 3.8363    | -0.1877 | 0.173090 |
| <i>Ndufs3</i>        | chr2:90894633-90904827    | 19.5877  | 17.5797   | -0.1560 | 0.097227 |
| <i>Gm13785</i>       | chr2:92312153-92312843    | 1.5342   | 2.4139    | 0.6538  | 0.279553 |
| <i>Nusap1</i>        | chr2:119618297-119651244  | 3.6725   | 5.1528    | 0.4886  | 0.266513 |
| <i>Aurka</i>         | chr2:172356189-172370535  | 2.5707   | 3.0315    | 0.2379  | 0.206124 |
| <i>mt-Nd4</i>        | chrM:10166-11544          | 69.2628  | 90.6045   | 0.3875  | 0.279177 |
| <i>E130311K13Rik</i> | chr3:63914683-63929472    | 2.9034   | 3.4583    | 0.2523  | 0.327383 |
| <i>Chil5</i>         | chr3:106016918-106024916  | 17.9520  | 11.0449   | -0.7008 | 0.274127 |
| <i>Ufl1</i>          | chr4:25248599-25281821    | 8.1793   | 8.7825    | 0.1027  | 0.138087 |
| <i>3110043O21Rik</i> | chr4:35191284-35226175    | 2.3961   | 2.0440    | -0.2293 | 0.077858 |
| <i>Gm26643</i>       | chr4:43030998-43032482    | 3.5449   | 2.8052    | -0.3376 | 0.102610 |
| <i>Rnf38</i>         | chr4:44126209-44233789    | 17.5743  | 19.1758   | 0.1258  | 0.347062 |
| <i>Zcchc7</i>        | chr4:44755876-44932215    | 20.0917  | 21.4996   | 0.0977  | 0.281818 |
| <i>Gm11223</i>       | chr4:69925200-69926171    | 1.2699   | 1.7136    | 0.4323  | 0.008012 |
| <i>Ybx1</i>          | chr4:119277980-119294604  | 71.4072  | 78.6760   | 0.1399  | 0.315735 |
| <i>Bmp8b</i>         | chr4:123105164-123132099  | 1.6189   | 1.8834    | 0.2183  | 0.096771 |
| <i>Xkr8</i>          | chr4:132724896-132732546  | 1.7393   | 2.0221    | 0.2173  | 0.209477 |
| <i>NA</i>            | chr4:144972622-144974683  | 6.1746   | 5.3410    | -0.2092 | 0.074365 |
| <i>Gm4540</i>        | chr3:106034661-106035056  | 2.3905   | 1.2855    | -0.8950 | 0.266108 |
| <i>Car5b</i>         | chrX:163976821-164027997  | 0.1744   | 0.2738    | 0.6507  | 0.300643 |
| <i>Palm3</i>         | chr8:84021470-84030295    | 10.6428  | 11.9755   | 0.1702  | 0.337265 |
| <i>4930519F09Rik</i> | chr10:28880920-28923507   | 14.0229  | 11.7754   | -0.2520 | 0.250190 |
| <i>Hist1h2ah</i>     | chr13:22035112-22035643   | 2.2616   | 3.2277    | 0.5132  | 0.281952 |
| <i>Slc6a6</i>        | chr6:91684066-91759063    | 20.3398  | 18.7049   | -0.1209 | 0.090047 |
| <i>Rrm1</i>          | chr7:102441694-102469771  | 15.6543  | 17.2124   | 0.1369  | 0.350752 |
| <i>Gvin1</i>         | chr7:106156534-106215340  | 1.5056   | 1.7352    | 0.2048  | 0.318241 |
| <i>NA</i>            | chr17:35994515-35999749   | 4.0912   | 3.5599    | -0.2007 | 0.078403 |
| <i>Exosc1</i>        | chr19:41922979-41933314   | 20.0670  | 22.3192   | 0.1535  | 0.274469 |
| <i>Usp20</i>         | chr2:30982278-31023586    | 5.4889   | 4.8584    | -0.1761 | 0.192197 |
| <i>Tox</i>           | chr4:6686352-6991557      | 4.6970   | 5.2739    | 0.1671  | 0.367617 |
| <i>Mknk1</i>         | chr4:115839197-115879250  | 9.3462   | 8.4377    | -0.1475 | 0.099817 |
| <i>Gm20708</i>       | chr11:117809667-117839904 | 10.8330  | 12.1185   | 0.1618  | 0.262649 |
| <i>Ncapg</i>         | chr5:45669921-45700544    | 2.3458   | 2.7373    | 0.2227  | 0.374518 |
| <i>Rpl30</i>         | chr15:34440504-34443640   | 54.3632  | 47.3899   | -0.1981 | 0.267793 |
| <i>B230325K18Rik</i> | chr7:127983078-127985701  | 2.9548   | 3.5499    | 0.2647  | 0.371015 |
| <i>D10Jhu81e</i>     | chr10:78162066-78169768   | 35.2980  | 31.4742   | -0.1654 | 0.124981 |
| <i>Ccdc53</i>        | chr10:88201092-88246158   | 14.5537  | 15.4076   | 0.0822  | 0.049218 |
| <i>Tmem194</i>       | chr10:127666900-127701049 | 5.8420   | 5.2101    | -0.1651 | 0.168405 |
| <i>Xaf1</i>          | chr11:72301628-72313733   | 9.7140   | 11.2317   | 0.2094  | 0.404022 |
| <i>1810032O08Rik</i> | chr11:116671659-116675799 | 7.2949   | 6.3750    | -0.1945 | 0.118336 |
| <i>Gm11738</i>       | chr11:118114854-118118279 | 0.5155   | 0.7419    | 0.5253  | 0.220128 |
| <i>AU020206</i>      | chr7:75769761-75782099    | 21.7678  | 25.3377   | 0.2191  | 0.372952 |
| <i>Mtmr2</i>         | chr9:13748409-13806481    | 17.3667  | 18.3970   | 0.0831  | 0.138640 |
| <i>Ibtk</i>          | chr9:85687360-85749334    | 21.2646  | 19.5166   | -0.1238 | 0.065262 |
| <i>Gm8817</i>        | chrX:167063193-167070380  | 2.2806   | 2.9911    | 0.3913  | 0.179067 |
| <i>Gm14441</i>       | chr2:22913292-22913832    | 1.1639   | 1.9299    | 0.7296  | 0.221161 |
| <i>Ciz1</i>          | chr2:32352326-32380226    | 8.7414   | 9.5957    | 0.1345  | 0.308746 |
| <i>Gm22953</i>       | chr2:121450669-121450770  | 36.5346  | 44.0926   | 0.2713  | 0.056863 |
| <i>Cpne1</i>         | chr2:156071844-156111959  | 45.8138  | 42.5339   | -0.1072 | 0.033424 |
| <i>Eij5a2</i>        | chr3:28781310-28798846    | 3.6475   | 4.1007    | 0.1690  | 0.300874 |
| <i>Fgf2</i>          | chr3:37312518-37405377    | 2.6815   | 3.2152    | 0.2619  | 0.199818 |
| <i>Rps26</i>         | chr10:128624529-128626506 | 888.9165 | 1237.3679 | 0.4772  | 0.229942 |
| <i>Trbv26</i>        | chr6:41227524-41227993    | 25.6511  | 20.1544   | -0.3479 | 0.309241 |
| <i>Pcyox1</i>        | chr6:86386005-86397150    | 4.7040   | 4.1808    | -0.1701 | 0.078517 |
| <i>Gm21984</i>       | chr7:126942094-126952873  | 2.7209   | 1.9244    | -0.4997 | 0.194846 |
| <i>Gm25500</i>       | chr9:15312551-15312674    | 16.7836  | 11.2182   | -0.5812 | 0.289759 |
| <i>Gm20507</i>       | chr17:33630758-33645705   | 3.5341   | 4.0207    | 0.1861  | 0.175146 |
| <i>Gm24452</i>       | chr19:8724530-8724602     | 93.5190  | 110.2759  | 0.2378  | 0.280579 |
| <i>Mastl</i>         | chr2:23115605-23156024    | 1.2148   | 1.4300    | 0.2353  | 0.279163 |
| <i>Fyn</i>           | chr10:39368854-39565381   | 77.0013  | 80.9137   | 0.0715  | 0.243530 |
| <i>Snrnp48</i>       | chr13:38204938-38227663   | 40.7248  | 43.4316   | 0.0928  | 0.152377 |
| <i>Gm24727</i>       | chr8:33691800-33691944    | 18.8876  | 26.4854   | 0.4878  | 0.342528 |
| <i>Kbtbd7</i>        | chr14:79426510-79431039   | 3.0551   | 2.6547    | -0.2027 | 0.066272 |
| <i>Paqr4</i>         | chr17:23736185-23740330   | 5.3078   | 6.1462    | 0.2116  | 0.317937 |
| <i>Mis18a</i>        | chr16:90719311-90727404   | 12.4184  | 13.4781   | 0.1181  | 0.144729 |
| <i>Zbtb8a</i>        | chr4:129353627-129378116  | 5.9885   | 6.6527    | 0.1517  | 0.117585 |
| <i>Spast</i>         | chr17:74338986-74391113   | 19.7685  | 17.8572   | -0.1467 | 0.152672 |
| <i>Heatr6</i>        | chr11:83753695-83783754   | 9.7253   | 8.8623    | -0.1341 | 0.095866 |
| <i>Lsm12</i>         | chr11:102162496-102185296 | 12.5896  | 14.2692   | 0.1807  | 0.316256 |
| <i>Bcl3</i>          | chr7:19808461-19822770    | 6.9935   | 8.4055    | 0.2653  | 0.407425 |
| <i>BC023829</i>      | chrX:70459752-70477180    | 8.0176   | 6.9861    | -0.1987 | 0.120479 |



|               |                           |          |          |         |          |
|---------------|---------------------------|----------|----------|---------|----------|
| Gm21769       | chr8:20122364-20126624    | 0.6454   | 0.8250   | 0.3542  | 0.273973 |
| Rcor3         | chr1:192098655-192138010  | 3.3636   | 3.7953   | 0.1742  | 0.164652 |
| Bola1         | chr3:96196587-96219709    | 7.5252   | 9.0054   | 0.2591  | 0.339002 |
| Taf3          | chr2:9914551-10048596     | 3.6397   | 4.0666   | 0.1600  | 0.284882 |
| Gm16577       | chr10:11212279-11212979   | 4.5911   | 3.3571   | -0.4516 | 0.086641 |
| Gm14303       | chr2:172509431-172509697  | 21.4742  | 15.8237  | -0.4405 | 0.253597 |
| Hus1          | chr11:8993136-9011191     | 4.3224   | 3.8662   | -0.1609 | 0.061002 |
| Fibcd1        | chr2:31813289-31846005    | 0.1354   | 0.2276   | 0.7493  | 0.247760 |
| Hn1           | chr11:115497352-115514387 | 60.6441  | 54.0136  | -0.1670 | 0.205083 |
| Hist1h3e      | chr13:23561533-23562369   | 33.5941  | 37.6040  | 0.1627  | 0.301472 |
| E2f3          | chr13:29906574-29985668   | 2.2969   | 2.6143   | 0.1867  | 0.254947 |
| Gm16578       | chr13:54219452-54223023   | 1.1586   | 1.6570   | 0.5163  | 0.065057 |
| Zfp12         | chr5:143235162-143248834  | 11.4561  | 10.4455  | -0.1332 | 0.055900 |
| Slc37a2       | chr9:37229148-37255738    | 1.7787   | 1.5189   | -0.2278 | 0.041803 |
| Mir5113       | chr15:80940038-80940120   | 26.7134  | 19.0738  | -0.4860 | 0.144607 |
| Vps39         | chr2:120316460-120353137  | 12.5376  | 13.2415  | 0.0788  | 0.193196 |
| Rtfcd1        | chr2:172440555-172469908  | 36.5078  | 33.1356  | -0.1398 | 0.106342 |
| Mrp153        | chr6:83109094-83109939    | 18.9825  | 16.4394  | -0.2075 | 0.110149 |
| Hmces         | chr6:87913934-87936629    | 8.1629   | 7.0987   | -0.2015 | 0.131128 |
| Ccnd1         | chr7:144929930-144939869  | 1.0327   | 1.2673   | 0.2953  | 0.174324 |
| Abhd13        | chr8:9977706-9992155      | 17.6687  | 15.9402  | -0.1485 | 0.141217 |
| Prim2         | chr1:33453810-33669786    | 11.0656  | 12.0922  | 0.1280  | 0.090493 |
| Slc35c2       | chr2:165276553-165287869  | 7.0890   | 6.3344   | -0.1624 | 0.077175 |
| Arfgap1       | chr2:180967224-180982526  | 16.2383  | 14.9346  | -0.1207 | 0.065734 |
| Cp            | chr3:19957053-20009145    | 0.8245   | 0.6719   | -0.2952 | 0.196643 |
| Rgs19         | chr2:181688418-181693977  | 47.9510  | 44.1714  | -0.1184 | 0.074709 |
| Gm26836       | chr11:75745071-75761195   | 6.4619   | 5.5362   | -0.2231 | 0.082521 |
| Lrwd1         | chr5:136122771-136136074  | 13.5593  | 12.3996  | -0.1290 | 0.073656 |
| Klrc2         | chr6:129647495-129660689  | 1.1618   | 1.7087   | 0.5565  | 0.262291 |
| Gm6419        | chr10:74862987-74863419   | 2.5814   | 3.6893   | 0.5152  | 0.206162 |
| Txndc5        | chr13:38500272-38528824   | 20.4751  | 22.4289  | 0.1315  | 0.336316 |
| Riok3         | chr18:12128849-12157367   | 45.0825  | 41.1934  | -0.1302 | 0.101621 |
| Cltc          | chr4:44004451-44032846    | 93.3557  | 102.8054 | 0.1391  | 0.330939 |
| Myo5c         | chr9:75232013-75305451    | 0.1321   | 0.2120   | 0.6820  | 0.286949 |
| Smim11        | chr16:92301285-92313041   | 16.1126  | 18.4701  | 0.1970  | 0.307253 |
| Dock8         | chr19:24999528-25202432   | 67.0053  | 61.7342  | -0.1182 | 0.136684 |
| Peak1         | chr9:56201130-56418050    | 6.7035   | 7.7528   | 0.2098  | 0.449450 |
| Sema6c        | chr3:95160456-95174024    | 0.1611   | 0.2260   | 0.4886  | 0.045797 |
| Gls2          | chr10:128194456-128210004 | 0.6691   | 0.5066   | -0.4016 | 0.009502 |
| Gas8          | chr8:123518834-123536649  | 2.9136   | 3.4695   | 0.2519  | 0.187313 |
| I7Rn6         | chr7:89917528-89941199    | 7.0929   | 5.7820   | -0.2948 | 0.271582 |
| Fuca1         | chr4:135920734-135940311  | 14.0705  | 12.5939  | -0.1600 | 0.144294 |
| Atxn713b      | chr10:112925437-112929026 | 35.6652  | 32.0073  | -0.1561 | 0.188467 |
| Ssr3          | chr3:65379654-65392623    | 36.0514  | 38.3196  | 0.0880  | 0.157777 |
| Mir719        | chr14:60228805-60228915   | 99.0625  | 111.3938 | 0.1693  | 0.098099 |
| Coq10a        | chr10:128363096-128370032 | 7.4308   | 6.4779   | -0.1980 | 0.175303 |
| Tmem101       | chr11:102152545-102156404 | 4.4349   | 3.7979   | -0.2237 | 0.040583 |
| Hivep3        | chr4:119733783-120138045  | 0.2902   | 0.3562   | 0.2957  | 0.215272 |
| Uqcrb         | chr13:66900616-66905378   | 17.2284  | 14.4131  | -0.2574 | 0.228470 |
| Pold3         | chr7:100082110-100121565  | 14.4347  | 15.3324  | 0.0870  | 0.153100 |
| Casp7         | chr19:56397128-56442344   | 7.3145   | 8.0752   | 0.1428  | 0.193997 |
| Bard1         | chr1:71027497-71103146    | 1.4231   | 1.6536   | 0.2166  | 0.282578 |
| Gm23548       | chr4:123490230-123490336  | 12.6731  | 8.6388   | -0.5529 | 0.054211 |
| Trbv13-1      | chr6:41116035-41116468    | 126.6319 | 109.2814 | -0.2126 | 0.245562 |
| Gm20431       | chr2:167607849-167661496  | 7.6840   | 6.7978   | -0.1768 | 0.056138 |
| Gm26528       | chr10:22281453-22281736   | 5.2742   | 7.1437   | 0.4377  | 0.187146 |
| C920006O11Rik | chr9:78175913-78178879    | 4.2513   | 4.9996   | 0.2339  | 0.212944 |
| O610012D04Rik | chr17:87362238-87364462   | 1.2454   | 1.8693   | 0.5859  | 0.051208 |
| Dnaja3        | chr16:4639988-4707695     | 18.0178  | 16.4769  | -0.1290 | 0.068767 |
| Adhfe1        | chr1:9547947-9577970      | 0.3503   | 0.4926   | 0.4918  | 0.263930 |
| Nup188        | chr2:30286396-30344266    | 12.6959  | 11.6258  | -0.1270 | 0.101121 |
| Gyg           | chr3:20122083-20155317    | 12.3489  | 13.2733  | 0.1041  | 0.063316 |
| Sar1a         | chr10:61680309-61693295   | 57.2069  | 52.0219  | -0.1371 | 0.127522 |
| Pthrhd1       | chr12:4234026-4240123     | 1.7316   | 2.0080   | 0.2136  | 0.184953 |
| Dmtf1         | chr5:9118800-9161749      | 47.6221  | 50.5591  | 0.0863  | 0.235995 |
| Med28         | chr5:45520220-45529276    | 10.6816  | 9.3698   | -0.1890 | 0.216431 |
| Polr2l        | chr7:141471859-141475132  | 4.4358   | 3.6801   | -0.2695 | 0.153954 |
| 2610005L07Rik | chr8:20267773-20424814    | 0.2349   | 0.3295   | 0.4886  | 0.090028 |
| Snord14e      | chr9:40804747-40804837    | 98.6012  | 73.3771  | -0.4263 | 0.340521 |
| B230359F08Rik | chr14:53795359-53797832   | 1.1532   | 0.7961   | -0.5345 | 0.075805 |
| Gm15539       | chr16:3927605-3928171     | 2.9427   | 2.1049   | -0.4834 | 0.045664 |

|                      |                           |          |          |         |          |
|----------------------|---------------------------|----------|----------|---------|----------|
| <i>Gigyf2</i>        | chr1:87326997-87450796    | 14.2100  | 15.1742  | 0.0947  | 0.236181 |
| <i>Rc3h1</i>         | chr1:160906417-160974978  | 22.6166  | 20.5648  | -0.1372 | 0.162461 |
| <i>Gm14253</i>       | chr2:156346803-156347997  | 2.2755   | 3.0285   | 0.4124  | 0.275561 |
| <i>Scarna2</i>       | chr3:108554337-108554751  | 968.9435 | 851.2627 | -0.1868 | 0.224126 |
| <i>Camk2b</i>        | chr11:5969643-6066362     | 1.5711   | 1.8194   | 0.2117  | 0.327671 |
| <i>Tbrg4</i>         | chr11:6615597-6626067     | 14.4476  | 13.2314  | -0.1269 | 0.046777 |
| <i>Cdk6</i>          | chr5:3343892-3523218      | 11.7852  | 10.2568  | -0.2004 | 0.289614 |
| <i>Bcl7b</i>         | chr5:135168282-135181855  | 18.7215  | 21.1313  | 0.1747  | 0.330358 |
| <i>Tipin</i>         | chr9:64281606-64304792    | 20.9871  | 23.3364  | 0.1531  | 0.279080 |
| <i>Plcd4</i>         | chr1:74542887-74567794    | 1.1035   | 0.9081   | -0.2811 | 0.132352 |
| <i>Mrto4</i>         | chr4:139347434-139352576  | 9.8079   | 8.6821   | -0.1759 | 0.096217 |
| <i>Gm13031</i>       | chr4:140947665-140957902  | 5.7526   | 4.7444   | -0.2780 | 0.041325 |
| <i>C78339</i>        | chr13:46669521-46678056   | 20.2000  | 18.3587  | -0.1379 | 0.123523 |
| <i>Parp8</i>         | chr13:116854823-117025516 | 27.4691  | 29.1110  | 0.0838  | 0.121449 |
| <i>Tbc1d1</i>        | chr5:64159450-64351486    | 22.9608  | 24.2410  | 0.0783  | 0.272283 |
| <i>Sh3rf1</i>        | chr8:61224170-61396072    | 1.3059   | 1.5127   | 0.2122  | 0.142223 |
| <i>Brd2</i>          | chr17:34112022-34122634   | 45.9419  | 48.5933  | 0.0809  | 0.252536 |
| <i>Gm20540</i>       | chr17:49427937-49429240   | 1.1835   | 1.7346   | 0.5515  | 0.221815 |
| <i>Zhx3</i>          | chr2:160743926-160872998  | 10.1394  | 9.1731   | -0.1445 | 0.184313 |
| <i>Gm6485</i>        | chr3:104752726-104753165  | 2.8254   | 1.8463   | -0.6138 | 0.132017 |
| <i>Trit1</i>         | chr4:123016596-123054949  | 17.3640  | 15.5579  | -0.1585 | 0.121729 |
| <i>Cpsf3l</i>        | chr4:155869545-155889103  | 27.8441  | 25.4854  | -0.1277 | 0.077387 |
| <i>Gstt2</i>         | chr10:75831844-75834881   | 23.0121  | 20.3476  | -0.1775 | 0.175385 |
| <i>Gm21989</i>       | chr12:20990458-21200919   | 0.4742   | 0.7318   | 0.6260  | 0.261504 |
| <i>Gm15753</i>       | chr5:137720353-137721740  | 1.3655   | 0.8930   | -0.6127 | 0.240236 |
| <i>Cmb1</i>          | chr15:31568790-31590119   | 3.2915   | 2.5412   | -0.3732 | 0.220889 |
| <i>Trim26</i>        | chr17:36837133-36859398   | 15.1614  | 15.9219  | 0.0706  | 0.100012 |
| <i>Bank1</i>         | chr3:136053362-136326046  | 1.1952   | 1.4659   | 0.2946  | 0.243828 |
| <i>Gm26596</i>       | chr10:112928500-112931155 | 4.2441   | 3.6554   | -0.2154 | 0.085576 |
| <i>Ddit3</i>         | chr10:127290773-127296288 | 14.8765  | 16.1048  | 0.1145  | 0.142334 |
| <i>Ap1b1</i>         | chr11:4986823-5042791     | 25.4361  | 23.3024  | -0.1264 | 0.125268 |
| <i>Cnrip1</i>        | chr11:17051585-17079371   | 0.2150   | 0.3272   | 0.6058  | 0.301893 |
| <i>Appbp2</i>        | chr11:85187261-85235130   | 14.1008  | 12.9533  | -0.1225 | 0.066808 |
| <i>2010015M23Rik</i> | chr11:88039577-88047360   | 2.3303   | 1.7609   | -0.4042 | 0.142718 |
| <i>Gm11531</i>       | chr11:96392111-96392666   | 3.4798   | 4.6069   | 0.4048  | 0.198068 |
| <i>Rbm25</i>         | chr12:83631235-83683123   | 28.3834  | 29.9810  | 0.0790  | 0.235786 |
| <i>A630072L19Rik</i> | chr12:100941741-100949875 | 11.3933  | 10.2975  | -0.1459 | 0.090909 |
| <i>NA</i>            | chr13:23575762-23577011   | 3.5401   | 4.4865   | 0.3418  | 0.320135 |
| <i>Mblac2</i>        | chr13:81711416-81753275   | 3.8295   | 4.3323   | 0.1779  | 0.264505 |
| <i>Fam151b</i>       | chr13:92449621-92484031   | 0.7198   | 1.0267   | 0.5123  | 0.230021 |
| <i>Taf9</i>          | chr13:100651342-100656059 | 19.4667  | 21.5203  | 0.1447  | 0.260476 |
| <i>Mier3</i>         | chr13:111686177-111718596 | 10.5202  | 11.4481  | 0.1220  | 0.268332 |
| <i>Ankrd17</i>       | chr5:90227189-90366185    | 21.9716  | 23.5089  | 0.0976  | 0.303073 |
| <i>Tgfbr3</i>        | chr5:107106569-107289629  | 8.1497   | 8.7595   | 0.1041  | 0.234969 |
| <i>4921507P07Rik</i> | chr6:50573301-50596632    | 1.4370   | 1.1382   | -0.3363 | 0.047358 |
| <i>Hnrnpul1</i>      | chr7:25721497-25754730    | 70.7499  | 77.3966  | 0.1295  | 0.356647 |
| <i>Nipa1</i>         | chr7:55977566-56019954    | 0.2687   | 0.3916   | 0.5433  | 0.189046 |
| <i>Ppme1</i>         | chr7:100326736-100371896  | 16.4984  | 14.7925  | -0.1575 | 0.105511 |
| <i>Oraov1</i>        | chr7:144915099-144930748  | 6.1996   | 5.4545   | -0.1847 | 0.158216 |
| <i>NA</i>            | chr8:4325226-4348790      | 1.9812   | 1.4395   | -0.4608 | 0.130287 |
| <i>Terf2</i>         | chr8:107069399-107096547  | 11.4968  | 12.2141  | 0.0873  | 0.127875 |
| <i>Gm14703</i>       | chrX:7651105-7657258      | 0.5850   | 0.3522   | -0.7320 | 0.170592 |
| <i>Gpr174</i>        | chrX:107255877-107296769  | 30.3525  | 33.6300  | 0.1479  | 0.368150 |
| <i>Bop1</i>          | chr15:76452995-76477269   | 39.0476  | 35.9362  | -0.1198 | 0.056465 |
| <i>Dynlt1f</i>       | chr17:6648940-6655939     | 3.9058   | 4.8354   | 0.3080  | 0.169596 |
| <i>BC051226</i>      | chr17:33908181-33909317   | 10.6031  | 11.9937  | 0.1778  | 0.184763 |
| <i>H2-Aa</i>         | chr17:34282743-34287827   | 2.7911   | 3.5050   | 0.3286  | 0.358384 |
| <i>NA</i>            | chr17:34996735-35000958   | 22.9722  | 25.7559  | 0.1650  | 0.404478 |
| <i>Olfr756-ps1</i>   | chr17:37285141-37286069   | 1.5416   | 2.1422   | 0.4747  | 0.235845 |
| <i>Runx2os2</i>      | chr17:44710221-44713925   | 1.0401   | 1.7157   | 0.7221  | 0.406704 |
| <i>Cluap1</i>        | chr16:3908800-3941147     | 20.7363  | 18.9006  | -0.1337 | 0.047560 |
| <i>Camk2n2</i>       | chr16:20619214-20621287   | 0.7286   | 0.4665   | -0.6432 | 0.061771 |
| <i>Tceb1</i>         | chr1:16642765-16656865    | 29.7083  | 25.4065  | -0.2257 | 0.268930 |
| <i>Soat1</i>         | chr1:156428107-156474328  | 17.8815  | 16.3229  | -0.1316 | 0.088681 |
| <i>NA</i>            | chr18:36671159-36679366   | 20.9970  | 18.7133  | -0.1661 | 0.161219 |
| <i>Msrb2</i>         | chr2:19371439-19394976    | 7.0032   | 6.0407   | -0.2133 | 0.030977 |
| <i>1700029I15Rik</i> | chr2:92382917-92385708    | 2.3161   | 1.5939   | -0.5392 | 0.162012 |
| <i>Dnajc24</i>       | chr2:105966708-106003549  | 7.9965   | 6.6873   | -0.2579 | 0.180203 |
| <i>Gm14085</i>       | chr2:122484940-122528040  | 41.6566  | 37.1404  | -0.1656 | 0.216022 |
| <i>Mfsd8</i>         | chr3:40818069-40846885    | 5.5788   | 6.2220   | 0.1574  | 0.293849 |
| <i>Gm20402</i>       | chr3:52268434-52269435    | 29.8695  | 25.5578  | -0.2249 | 0.249163 |

|                      |                           |          |          |         |          |
|----------------------|---------------------------|----------|----------|---------|----------|
| <i>Rtca</i>          | chr3:116488962-116508208  | 12.3295  | 10.9344  | -0.1732 | 0.088325 |
| <i>Lrp8</i>          | chr4:107802260-107876840  | 0.6301   | 0.5197   | -0.2778 | 0.151100 |
| <i>Gm26330</i>       | chr4:117155185-117155289  | 18.0024  | 23.6999  | 0.3967  | 0.224870 |
| <i>Rsc1a1</i>        | chr4:141683562-141723419  | 25.2050  | 22.9009  | -0.1383 | 0.162808 |
| <i>Ndufa4</i>        | chr6:11900372-11907446    | 159.4205 | 137.3781 | -0.2147 | 0.287915 |
| <i>Cntd1</i>         | chr11:101279011-101296317 | 19.1415  | 20.1762  | 0.0760  | 0.079891 |
| <i>Arl4d</i>         | chr11:101665540-101667832 | 5.2802   | 6.5499   | 0.3109  | 0.365965 |
| <i>Ifrd1</i>         | chr12:40201566-40248504   | 11.9009  | 12.7916  | 0.1041  | 0.206557 |
| <i>Kdm2b</i>         | chr5:122870667-123015080  | 4.1856   | 3.8204   | -0.1317 | 0.041991 |
| <i>Polr2f</i>        | chr15:79141350-79151774   | 38.1440  | 33.1593  | -0.2020 | 0.154907 |
| <i>Creld2</i>        | chr15:88819645-88826681   | 15.0745  | 13.3098  | -0.1796 | 0.109766 |
| <i>Ndufa8</i>        | chr2:36036325-36049406    | 40.6509  | 45.1025  | 0.1499  | 0.315910 |
| <i>Ap4e1</i>         | chr2:127008716-127067909  | 6.6438   | 5.9719   | -0.1538 | 0.162865 |
| <i>mt-Tq</i>         | chrM:3771-3842            | 8.7110   | 12.9031  | 0.5668  | 0.002188 |
| <i>Chrnbl</i>        | chr11:69784035-69795943   | 3.5987   | 3.1119   | -0.2097 | 0.004391 |
| <i>Aup1</i>          | chr6:83054652-83057680    | 78.8860  | 85.7255  | 0.1200  | 0.318423 |
| <i>Stx3</i>          | chr19:11775118-11819403   | 1.5590   | 1.8092   | 0.2147  | 0.210754 |
| <i>Bcl11b</i>        | chr12:107910402-108003602 | 48.5795  | 52.4855  | 0.1116  | 0.336369 |
| <i>Gm614</i>         | chrX:101261375-101263992  | 11.7315  | 13.2795  | 0.1788  | 0.188947 |
| <i>Pold4</i>         | chr19:4231898-4233631     | 34.3311  | 37.5880  | 0.1308  | 0.270473 |
| <i>Llph</i>          | chr10:120227069-120232071 | 6.9023   | 5.9332   | -0.2183 | 0.075802 |
| <i>Cbx2</i>          | chr11:119022961-119031270 | 3.1654   | 2.7183   | -0.2196 | 0.177610 |
| <i>Mtrr</i>          | chr13:68560779-68582121   | 12.3180  | 11.1312  | -0.1462 | 0.077676 |
| <i>Zfp518b</i>       | chr5:38668483-38684826    | 0.7104   | 0.8510   | 0.2606  | 0.254512 |
| <i>Gm15708</i>       | chr5:144277060-144280513  | 2.1131   | 2.5606   | 0.2771  | 0.146152 |
| <i>Epn1</i>          | chr7:5080234-5098178      | 24.8547  | 22.2214  | -0.1616 | 0.223685 |
| <i>Got2</i>          | chr8:95864133-95888547    | 13.7106  | 14.9041  | 0.1204  | 0.266268 |
| <i>Cenpi</i>         | chrX:134308083-134362639  | 0.7815   | 0.9495   | 0.2808  | 0.300549 |
| <i>Gm15937</i>       | chr15:5208912-5210147     | 1.5011   | 1.9971   | 0.4118  | 0.175062 |
| <i>Chkb</i>          | chr15:89416404-89429908   | 10.6554  | 9.7898   | -0.1222 | 0.033682 |
| <i>Gbp5</i>          | chr3:142496933-142522344  | 10.9371  | 12.1933  | 0.1569  | 0.336933 |
| <i>Aim1l</i>         | chr4:134065911-134092504  | 2.3660   | 2.0328   | -0.2190 | 0.200144 |
| <i>Twf2</i>          | chr9:106203107-106215387  | 84.3918  | 75.1051  | -0.1682 | 0.192989 |
| <i>Amd1</i>          | chr10:40287457-40302188   | 4.5607   | 5.1187   | 0.1665  | 0.220908 |
| <i>Gm16144</i>       | chr9:69477028-69479598    | 1.0985   | 0.7065   | -0.6369 | 0.022334 |
| <i>Gm12107</i>       | chr11:31832659-31838214   | 1.9224   | 1.3847   | -0.4734 | 0.111500 |
| <i>Dtx3l</i>         | chr16:35926510-35939151   | 52.8686  | 56.1822  | 0.0877  | 0.280508 |
| <i>Mllt4</i>         | chr17:13760538-13906150   | 1.2320   | 1.0280   | -0.2611 | 0.254308 |
| <i>Sh3bp5l</i>       | chr11:58330723-58347728   | 5.2008   | 4.6453   | -0.1629 | 0.134196 |
| <i>Xbp1</i>          | chr11:5520658-5525893     | 15.2527  | 13.7074  | -0.1541 | 0.148552 |
| <i>Zbtb22</i>        | chr17:33915903-33919324   | 15.3471  | 16.9449  | 0.1429  | 0.327798 |
| <i>Rnasel</i>        | chr1:153749425-153764221  | 16.0546  | 17.0169  | 0.0840  | 0.280386 |
| <i>Proscos</i>       | chr8:27042376-27043042    | 0.8963   | 1.3813   | 0.6239  | 0.132058 |
| <i>Ppcdc</i>         | chr9:57412667-57440114    | 28.9975  | 26.0329  | -0.1556 | 0.206153 |
| <i>Akap7</i>         | chr10:25169089-25307870   | 0.7867   | 0.9444   | 0.2635  | 0.053372 |
| <i>Scamp4</i>        | chr10:80602881-80615783   | 19.3273  | 17.2593  | -0.1633 | 0.174976 |
| <i>Gna15</i>         | chr10:81502305-81524225   | 5.4729   | 6.2177   | 0.1841  | 0.220367 |
| <i>Nefh</i>          | chr11:4938753-4948064     | 5.0293   | 5.6015   | 0.1555  | 0.258277 |
| <i>Zfp3</i>          | chr11:70764208-70772928   | 5.5583   | 4.7624   | -0.2230 | 0.128543 |
| <i>Srr</i>           | chr11:74906358-74925948   | 16.4402  | 15.1026  | -0.1224 | 0.032308 |
| <i>Zfp346</i>        | chr13:55105310-55134825   | 7.2917   | 6.4857   | -0.1690 | 0.130500 |
| <i>Nnt</i>           | chr13:119335447-119408997 | 3.9020   | 3.4573   | -0.1746 | 0.153243 |
| <i>Ccdc18</i>        | chr5:108132913-108232947  | 0.6932   | 0.8477   | 0.2904  | 0.194342 |
| <i>Gusb</i>          | chr5:129989010-130003049  | 12.6089  | 11.5592  | -0.1254 | 0.040501 |
| <i>BC037034</i>      | chr5:138259655-138264046  | 26.1884  | 24.1614  | -0.1162 | 0.063779 |
| <i>Gm26712</i>       | chr6:57689432-57689649    | 27.4702  | 33.0057  | 0.2649  | 0.286824 |
| <i>Loh12cr1</i>      | chr6:134639626-134711184  | 7.3229   | 6.2618   | -0.2258 | 0.172675 |
| <i>Lrmp</i>          | chr6:145115652-145174934  | 42.5666  | 39.3456  | -0.1135 | 0.090275 |
| <i>Zfp954</i>        | chr7:7114689-7121445      | 17.2746  | 15.3629  | -0.1692 | 0.149058 |
| <i>2310014L17Rik</i> | chr7:12927415-12931072    | 0.8149   | 0.9946   | 0.2876  | 0.035021 |
| <i>Vasp</i>          | chr7:19256928-19271817    | 153.9951 | 142.7391 | -0.1095 | 0.087567 |
| <i>Sdhof1</i>        | chr7:30321410-30322375    | 18.6996  | 21.1412  | 0.1771  | 0.314570 |
| <i>Psenen</i>        | chr7:30561867-30563184    | 2.9528   | 2.1805   | -0.4374 | 0.087539 |
| <i>AA474408</i>      | chr7:110057986-110061325  | 3.2441   | 2.8233   | -0.2004 | 0.028834 |
| <i>9030624J02Rik</i> | chr7:118740225-118842966  | 11.2504  | 10.2666  | -0.1320 | 0.086382 |
| <i>Ric8</i>          | chr7:140856956-140863730  | 27.0674  | 24.8612  | -0.1227 | 0.097152 |
| <i>Unc13a</i>        | chr8:71624416-71671757    | 1.8423   | 1.6035   | -0.2003 | 0.243756 |
| <i>Ireb2</i>         | chr9:54863754-54912534    | 11.4029  | 13.0070  | 0.1899  | 0.442147 |
| <i>Snord16a</i>      | chr9:64175422-64175521    | 10.8265  | 5.8939   | -0.8773 | 0.265998 |
| <i>Trip4</i>         | chr9:65828929-65908794    | 5.8203   | 6.1881   | 0.0884  | 0.126097 |
| <i>BC043934</i>      | chr9:96435783-96437434    | 27.8840  | 24.5600  | -0.1831 | 0.218703 |

|                      |                           |          |          |         |          |
|----------------------|---------------------------|----------|----------|---------|----------|
| <i>Cish</i>          | chr9:107296025-107302784  | 1.6261   | 1.3601   | -0.2577 | 0.231141 |
| <i>Gm5124</i>        | chrX:21360864-21364622    | 0.7314   | 0.9593   | 0.3913  | 0.209404 |
| <i>Armcx2</i>        | chrX:134804144-134809221  | 9.8362   | 10.5547  | 0.1017  | 0.146167 |
| <i>Tmem164</i>       | chrX:142681405-142843494  | 15.3976  | 14.2363  | -0.1131 | 0.035889 |
| <i>Vmn2r96</i>       | chr17:18581726-18598157   | 5.5526   | 4.5232   | -0.2958 | 0.322974 |
| <i>Lemd2</i>         | chr17:27189600-27204438   | 19.6661  | 17.7320  | -0.1494 | 0.150790 |
| <i>Brd4</i>          | chr17:32196273-32284722   | 6.1782   | 7.0669   | 0.1939  | 0.433850 |
| <i>Zfp952</i>        | chr17:32993128-33005457   | 10.3995  | 9.2520   | -0.1687 | 0.176911 |
| <i>Cdc45</i>         | chr16:18780446-18811987   | 3.4585   | 4.0627   | 0.2323  | 0.329152 |
| <i>Psmc2</i>         | chr16:20651651-20663414   | 35.6386  | 32.5908  | -0.1290 | 0.099121 |
| <i>Ets2</i>          | chr16:95702074-95721051   | 10.1910  | 9.2421   | -0.1410 | 0.098237 |
| <i>Stx5a</i>         | chr19:8741412-8756069     | 23.1602  | 21.5196  | -0.1060 | 0.029904 |
| <i>Gm5822</i>        | chr19:28862329-28863707   | 3.3475   | 4.1152   | 0.2979  | 0.271802 |
| <i>Gm15491</i>       | chr19:45749507-45752310   | 69.4739  | 63.2817  | -0.1347 | 0.059075 |
| <i>Exo1</i>          | chr1:175880777-175911396  | 0.7783   | 0.9632   | 0.3075  | 0.336230 |
| <i>Gm23301</i>       | chr18:75001454-75001519   | 45.5844  | 35.5527  | -0.3586 | 0.071104 |
| <i>Mrpl41</i>        | chr2:24974116-24975098    | 35.6517  | 40.1678  | 0.1721  | 0.329593 |
| <i>Slc2a8</i>        | chr2:32972989-32982083    | 1.9015   | 1.5147   | -0.3281 | 0.167217 |
| <i>Nr6a1</i>         | chr2:38723369-38927688    | 0.4498   | 0.5404   | 0.2647  | 0.032233 |
| <i>1110034G24Rik</i> | chr2:132686930-132751055  | 9.6550   | 8.3843   | -0.2036 | 0.193641 |
| <i>Pigu</i>          | chr2:155278242-155357430  | 3.1507   | 3.3903   | 0.1057  | 0.165746 |
| <i>Gatad2b</i>       | chr3:90341653-90358120    | 10.0505  | 11.3572  | 0.1763  | 0.339070 |
| <i>Zzz3</i>          | chr3:152395472-152462826  | 21.4910  | 19.7564  | -0.1214 | 0.096526 |
| <i>Tln1</i>          | chr4:43531518-43562691    | 108.9532 | 100.5694 | -0.1155 | 0.151208 |
| <i>NA</i>            | chr4:91805348-91806561    | 2.8866   | 3.5554   | 0.3006  | 0.236226 |
| <i>AU022252</i>      | chr4:119203569-119232712  | 4.1639   | 3.7850   | -0.1376 | 0.077812 |
| <i>S100pbb</i>       | chr4:129148004-129189727  | 11.9254  | 11.0165  | -0.1144 | 0.033906 |
| <i>Ski</i>           | chr4:155154074-155222592  | 17.9203  | 19.5421  | 0.1250  | 0.361663 |
| <i>Mex3d</i>         | chr10:80380354-80387659   | 2.7977   | 2.3571   | -0.2472 | 0.181739 |
| <i>Vezt</i>          | chr10:93939164-94035817   | 2.0324   | 1.8384   | -0.1447 | 0.095454 |
| <i>Gm11973</i>       | chr11:6475424-6493535     | 6.7855   | 5.6950   | -0.2528 | 0.068615 |
| <i>Gm12734</i>       | chr11:77542132-77543080   | 3.0606   | 3.9098   | 0.3533  | 0.252915 |
| <i>Gm527</i>         | chr12:64917910-64924591   | 1.4771   | 1.9162   | 0.3755  | 0.183680 |
| <i>Zc3hav1l</i>      | chr6:38287395-38299259    | 0.9848   | 0.8156   | -0.2719 | 0.152355 |
| <i>Usp38</i>         | chr8:80980733-81014906    | 43.8877  | 40.8549  | -0.1033 | 0.038226 |
| <i>Med17</i>         | chr9:15260351-15279867    | 20.2630  | 18.6918  | -0.1164 | 0.012876 |
| <i>Mrpl4</i>         | chr9:21002736-21008835    | 21.0737  | 18.6590  | -0.1756 | 0.138999 |
| <i>Adpgk</i>         | chr9:59291571-59316199    | 33.6105  | 29.9509  | -0.1663 | 0.251466 |
| <i>Traj45</i>        | chr14:54172827-54172890   | 20.2047  | 12.7951  | -0.6591 | 0.156782 |
| <i>Pkd1</i>          | chr17:24549949-24596514   | 13.7621  | 12.3930  | -0.1512 | 0.244511 |
| <i>Ap2m1</i>         | chr16:20535477-20544909   | 8.6543   | 9.2722   | 0.0995  | 0.119564 |
| <i>Fam174a</i>       | chr1:95313627-95335284    | 7.2347   | 8.1700   | 0.1754  | 0.257270 |
| <i>H3f3aos</i>       | chr1:180813775-180816859  | 4.3951   | 4.8961   | 0.1557  | 0.224107 |
| <i>Pygb</i>          | chr2:150786734-150831758  | 29.2138  | 26.6605  | -0.1319 | 0.119412 |
| <i>Larp7</i>         | chr3:127536953-127553348  | 28.7358  | 31.4736  | 0.1313  | 0.289179 |
| <i>Casp9</i>         | chr4:141793611-141815976  | 2.9853   | 3.3185   | 0.1526  | 0.186256 |
| <i>Gm22591</i>       | chr6:113060697-113060803  | 6.2216   | 10.1001  | 0.6990  | 0.338217 |
| <i>AI429214</i>      | chr8:36993574-36995531    | 0.3148   | 0.5344   | 0.7634  | 0.316783 |
| <i>Snx13</i>         | chr12:35047188-35147469   | 8.9798   | 8.2236   | -0.1269 | 0.048154 |
| <i>Lyrm7</i>         | chr11:54826865-54860916   | 4.1009   | 4.5503   | 0.1500  | 0.212118 |
| <i>2310058D17Rik</i> | chr11:58965747-58978050   | 4.4076   | 3.8395   | -0.1991 | 0.133462 |
| <i>Crk</i>           | chr11:75679258-75706908   | 23.9454  | 22.1172  | -0.1146 | 0.037694 |
| <i>Narf</i>          | chr11:121237252-121255856 | 16.8257  | 15.0301  | -0.1628 | 0.214092 |
| <i>Acad12</i>        | chr5:121598283-121618938  | 0.3808   | 0.2810   | -0.4385 | 0.059660 |
| <i>Tnpo3</i>         | chr6:29540826-29609887    | 20.5942  | 19.0372  | -0.1134 | 0.060428 |
| <i>Rwdd4a</i>        | chr8:47533663-47552955    | 11.7120  | 12.7425  | 0.1217  | 0.249325 |
| <i>Tspyl2</i>        | chrX:152336851-152342425  | 15.7271  | 17.1163  | 0.1221  | 0.290133 |
| <i>Nudt22</i>        | chr19:6993017-6996117     | 5.9090   | 4.8999   | -0.2702 | 0.154998 |
| <i>Vps18</i>         | chr2:119288739-119298453  | 5.8497   | 5.2863   | -0.1461 | 0.035861 |
| <i>Lsm14b</i>        | chr2:180024986-180035465  | 18.3950  | 16.9348  | -0.1193 | 0.013073 |
| <i>Fv1</i>           | chr4:147868978-147870358  | 12.7073  | 11.2158  | -0.1801 | 0.083530 |
| <i>Ighg2b</i>        | chr12:113306388-113307933 | 0.3520   | 1.8796   | 2.4166  | 0.082473 |
| <i>Gm20652</i>       | chr3:88616456-88621061    | 6.2593   | 4.5304   | -0.4664 | 0.231605 |
| <i>Snord100</i>      | chr10:23785749-23785823   | 81.8927  | 65.2852  | -0.3270 | 0.251440 |
| <i>Cirbp</i>         | chr10:80165984-80172786   | 30.1596  | 33.1572  | 0.1367  | 0.354541 |
| <i>Tmem198b</i>      | chr10:128800035-128804370 | 1.4407   | 1.7232   | 0.2583  | 0.244752 |
| <i>Actr2</i>         | chr11:20062303-20112913   | 65.1034  | 59.9649  | -0.1186 | 0.099371 |
| <i>Snord96a</i>      | chr11:48802031-48802112   | 74.2947  | 59.9715  | -0.3090 | 0.212679 |
| <i>C030037D09Rik</i> | chr11:88718644-88728893   | 0.2840   | 0.3786   | 0.4148  | 0.014874 |
| <i>Pnpo</i>          | chr11:96937824-96943986   | 14.5225  | 15.7198  | 0.1143  | 0.268835 |
| <i>Map2k6</i>        | chr11:110399121-110525522 | 2.8533   | 2.4019   | -0.2485 | 0.187104 |

|                      |                           |          |          |         |          |
|----------------------|---------------------------|----------|----------|---------|----------|
| <i>Dtd2</i>          | chr12:51988311-52006501   | 3.0852   | 3.4863   | 0.1763  | 0.235318 |
| <i>Dync1h1</i>       | chr12:110601451-110666945 | 66.9128  | 62.2578  | -0.1040 | 0.120402 |
| <i>Gpr137b-ps</i>    | chr13:12619083-12650297   | 1.5728   | 1.2794   | -0.2978 | 0.092404 |
| <i>Eij2b1</i>        | chr5:124570212-124579131  | 14.9607  | 13.4709  | -0.1513 | 0.120604 |
| <i>Wbscr16</i>       | chr5:134148053-134176774  | 5.7599   | 5.0029   | -0.2033 | 0.165716 |
| <i>Trbj1-4</i>       | chr6:41534810-41534861    | 188.3500 | 224.0248 | 0.2502  | 0.358753 |
| <i>Tax1bp1</i>       | chr6:52713728-52766780    | 51.5399  | 54.0079  | 0.0675  | 0.139738 |
| <i>Cecr2</i>         | chr6:120666368-120771190  | 0.0504   | 0.0746   | 0.5657  | 0.122894 |
| <i>Gm15720</i>       | chr6:146463325-146463607  | 5.7219   | 7.5215   | 0.3945  | 0.115711 |
| <i>Zfp784</i>        | chr7:5034438-5038446      | 4.0065   | 4.6005   | 0.1994  | 0.260552 |
| <i>Gm26529</i>       | chr7:89980748-89981848    | 4.3189   | 3.5021   | -0.3024 | 0.127517 |
| <i>Star</i>          | chr8:25808473-25814723    | 4.3707   | 3.8069   | -0.1992 | 0.100921 |
| <i>Zdhhc2</i>        | chr8:40423814-40510268    | 1.7485   | 2.0205   | 0.2085  | 0.317943 |
| <i>Isyna1</i>        | chr8:70594480-70597288    | 33.5235  | 29.9072  | -0.1647 | 0.195543 |
| <i>Rab8a</i>         | chr8:72161199-72183904    | 68.5128  | 74.5826  | 0.1225  | 0.338100 |
| <i>Edc3</i>          | chr9:57708539-57752499    | 13.5308  | 14.3290  | 0.0827  | 0.217386 |
| <i>Klf23</i>         | chr9:61917279-61946799    | 7.5584   | 8.1526   | 0.1092  | 0.116412 |
| <i>Foxo4</i>         | chrX:101254527-101260873  | 11.0173  | 11.9205  | 0.1137  | 0.263918 |
| <i>Prps2</i>         | chrX:167346321-167382749  | 43.5983  | 38.1373  | -0.1931 | 0.279175 |
| <i>Dscc1</i>         | chr15:55076098-55090491   | 0.9605   | 1.1551   | 0.2662  | 0.239585 |
| <i>Gm20405</i>       | chr15:65857868-65858356   | 6.8617   | 4.7503   | -0.5305 | 0.193010 |
| <i>NA</i>            | chr15:73095843-73096684   | 4.3378   | 5.2811   | 0.2839  | 0.260016 |
| <i>Plec</i>          | chr15:76170973-76232574   | 52.7679  | 47.4613  | -0.1529 | 0.264863 |
| <i>Phf11c</i>        | chr14:59380832-59395381   | 17.9019  | 19.8402  | 0.1483  | 0.375937 |
| <i>Gpr180</i>        | chr14:118137126-118164232 | 8.9804   | 7.9731   | -0.1716 | 0.134278 |
| <i>Ndufv3</i>        | chr17:31520114-31531321   | 38.1970  | 43.0214  | 0.1716  | 0.377074 |
| <i>Nfkbie</i>        | chr17:45555715-45563169   | 18.8293  | 17.1648  | -0.1335 | 0.047883 |
| <i>Zfp318</i>        | chr17:46383730-46420920   | 13.0277  | 13.9256  | 0.0961  | 0.322316 |
| <i>Pex6</i>          | chr17:46711462-46725541   | 10.4427  | 9.4123   | -0.1499 | 0.137570 |
| <i>Tnfsf9</i>        | chr17:57105384-57107757   | 1.1544   | 0.7875   | -0.5518 | 0.167271 |
| <i>Cript</i>         | chr17:87025549-87035810   | 21.0391  | 18.5898  | -0.1786 | 0.177527 |
| <i>Impg2</i>         | chr16:56204312-56273756   | 0.5174   | 0.4227   | -0.2917 | 0.065946 |
| <i>Fam168b</i>       | chr1:34813218-34843065    | 67.8856  | 63.4476  | -0.0975 | 0.034936 |
| <i>Gm17017</i>       | chr1:85641221-85650585    | 2.9420   | 2.4239   | -0.2795 | 0.208765 |
| <i>Gramd3</i>        | chr18:56432131-56503792   | 105.6053 | 112.3101 | 0.0888  | 0.332012 |
| <i>Ndor1</i>         | chr2:25244820-25256022    | 17.4708  | 16.0114  | -0.1258 | 0.144594 |
| <i>NA</i>            | chr2:73012853-73012927    | 11.5561  | 29.0321  | 1.3290  | 0.318838 |
| <i>Cry2</i>          | chr2:92403645-92434043    | 2.8169   | 2.5066   | -0.1684 | 0.055195 |
| <i>Ppm1j</i>         | chr3:104781055-104786018  | 9.5719   | 11.1235  | 0.2167  | 0.343125 |
| <i>Syde2</i>         | chr3:145987869-146021720  | 1.2480   | 1.0587   | -0.2373 | 0.033615 |
| <i>Zmym4</i>         | chr4:126861938-126968135  | 10.2481  | 10.8824  | 0.0866  | 0.226024 |
| <i>Gm12631</i>       | chr4:88033500-88034998    | 1.2094   | 1.7850   | 0.5616  | 0.173306 |
| <i>Clhc1</i>         | chr11:29547949-29578367   | 0.7239   | 0.9912   | 0.4534  | 0.326584 |
| <i>Agtrap</i>        | chr4:148077060-148088031  | 8.9083   | 8.0550   | -0.1453 | 0.075634 |
| <i>Mterf1a</i>       | chr5:3890580-3893933      | 6.0643   | 6.7503   | 0.1546  | 0.229334 |
| <i>4930469K13Rik</i> | chr11:33973960-34098554   | 13.5957  | 11.7500  | -0.2105 | 0.037982 |
| <i>Pcmt1</i>         | chr10:7629372-7681136     | 12.6514  | 11.5133  | -0.1360 | 0.099758 |
| <i>Prdm4</i>         | chr10:85891969-85916945   | 13.8752  | 14.9353  | 0.1062  | 0.328364 |
| <i>Gm11998</i>       | chr11:11557420-11579460   | 8.8795   | 7.4611   | -0.2511 | 0.157858 |
| <i>Gm17334</i>       | chr11:53772280-53773187   | 44.4234  | 48.2493  | 0.1192  | 0.245249 |
| <i>Pdlim4</i>        | chr11:54054927-54069014   | 1.5437   | 1.1683   | -0.4020 | 0.318442 |
| <i>Senp3</i>         | chr11:69673114-69682084   | 21.6166  | 19.7760  | -0.1284 | 0.096124 |
| <i>Gm15642</i>       | chr11:109437171-109438145 | 4.9687   | 3.5485   | -0.4857 | 0.082974 |
| <i>Usp36</i>         | chr11:118259650-118290244 | 10.6757  | 9.5333   | -0.1633 | 0.255602 |
| <i>Rps7</i>          | chr12:28630846-28635953   | 12.1774  | 13.4773  | 0.1463  | 0.104900 |
| <i>Xrcc3</i>         | chr12:111803191-111813873 | 2.2621   | 1.8581   | -0.2839 | 0.211556 |
| <i>C530050E15Rik</i> | chr13:24631917-24638567   | 16.4844  | 19.0258  | 0.2069  | 0.473542 |
| <i>Nudt9</i>         | chr5:104046305-104065379  | 15.2109  | 16.7292  | 0.1373  | 0.286552 |
| <i>Oasl1</i>         | chr5:114923239-114937915  | 5.0697   | 7.1234   | 0.4906  | 0.259831 |
| <i>Kntc1</i>         | chr5:123749725-123821593  | 1.3883   | 1.7194   | 0.3086  | 0.451118 |
| <i>Rbak</i>          | chr5:143172185-143180775  | 7.2363   | 6.4921   | -0.1566 | 0.086565 |
| <i>Aimp2</i>         | chr5:143902703-143909847  | 17.8254  | 19.3798  | 0.1206  | 0.225940 |
| <i>Zfp655</i>        | chr5:145231722-145247302  | 19.1860  | 17.2804  | -0.1509 | 0.188337 |
| <i>Clec2d</i>        | chr6:129180614-129186534  | 426.6359 | 451.5927 | 0.0820  | 0.247485 |
| <i>Tmem160</i>       | chr7:16452778-16455489    | 27.9858  | 24.4218  | -0.1965 | 0.207965 |
| <i>Zfp780b</i>       | chr7:27962707-27975368    | 6.4504   | 5.6665   | -0.1869 | 0.159043 |
| <i>Mrpl46</i>        | chr7:78775235-78783531    | 18.5454  | 20.4489  | 0.1410  | 0.285681 |
| <i>Btbd1</i>         | chr7:81792074-81829431    | 19.1666  | 20.7264  | 0.1129  | 0.257952 |
| <i>lqck</i>          | chr7:118855759-118972652  | 0.4440   | 0.6063   | 0.4494  | 0.245452 |
| <i>ltgax</i>         | chr7:128129546-128150656  | 3.1271   | 4.6901   | 0.5848  | 0.271534 |
| <i>Gm21182</i>       | chr8:20556694-20557333    | 0.8564   | 1.3721   | 0.6800  | 0.173660 |

|                      |                           |          |         |         |          |
|----------------------|---------------------------|----------|---------|---------|----------|
| <i>Large</i>         | chr8:72814598-73353540    | 0.1401   | 0.2058  | 0.5547  | 0.336129 |
| <i>Nlrc5</i>         | chr8:94472762-94527272    | 102.2291 | 93.4532 | -0.1295 | 0.201223 |
| <i>Spg7</i>          | chr8:123062941-123097760  | 17.9945  | 16.4360 | -0.1307 | 0.122266 |
| <i>Fam214a</i>       | chr9:74953052-75032468    | 14.3856  | 15.3173 | 0.0905  | 0.262302 |
| <i>Xrn1</i>          | chr9:95954759-96053027    | 25.6835  | 27.5741 | 0.1025  | 0.368579 |
| <i>Tfdp2</i>         | chr9:96196274-96323646    | 5.1371   | 4.5930  | -0.1615 | 0.152898 |
| <i>A530083I20Rik</i> | chr9:122885079-122903184  | 1.9195   | 1.5590  | -0.3001 | 0.192779 |
| <i>Apool</i>         | chrX:112311333-112372755  | 5.3365   | 5.8757  | 0.1389  | 0.199517 |
| <i>Tmem184b</i>      | chr15:79360683-79403303   | 4.0652   | 4.8093  | 0.2425  | 0.377886 |
| <i>Polr3a</i>        | chr14:24448693-24487046   | 18.5078  | 17.0885 | -0.1151 | 0.074069 |
| <i>Zmiz1os1</i>      | chr14:25455736-25461128   | 0.6660   | 0.8367  | 0.3293  | 0.136798 |
| <i>Mettl6</i>        | chr14:31478319-31495030   | 17.2463  | 15.6547 | -0.1397 | 0.072973 |
| <i>Lgals3</i>        | chr14:47367750-47386160   | 2.0930   | 3.3091  | 0.6609  | 0.301623 |
| <i>Traj48</i>        | chr14:54169808-54169868   | 34.4396  | 24.3870 | -0.4980 | 0.247986 |
| <i>Mir686</i>        | chr14:54616676-54616785   | 75.8778  | 63.1642 | -0.2646 | 0.168934 |
| <i>Zfp945</i>        | chr17:22846696-22867134   | 13.8634  | 14.6922 | 0.0838  | 0.286357 |
| <i>Igfals</i>        | chr17:24878769-24882008   | 0.4550   | 0.6319  | 0.4738  | 0.116514 |
| <i>Atf6b</i>         | chr17:34647145-34655074   | 14.6924  | 13.2939 | -0.1443 | 0.113017 |
| <i>Unc5cl</i>        | chr17:48454900-48539714   | 6.2050   | 7.2420  | 0.2229  | 0.402253 |
| <i>Gm4707</i>        | chr17:71458326-71460395   | 6.2177   | 5.1124  | -0.2824 | 0.311463 |
| <i>Fam98a</i>        | chr17:75537085-75551946   | 8.8393   | 7.9749  | -0.1485 | 0.063582 |
| <i>Prkd3</i>         | chr17:78949404-79020816   | 20.8760  | 21.9163 | 0.0702  | 0.179611 |
| <i>Gm24201</i>       | chr16:23110382-23110507   | 65.0827  | 76.3739 | 0.2308  | 0.308549 |
| <i>Taf5</i>          | chr19:47067747-47083479   | 10.7650  | 9.6912  | -0.1516 | 0.119181 |
| <i>Gm13684</i>       | chr2:83737781-83759865    | 0.8769   | 0.6407  | -0.4529 | 0.164438 |
| <i>Phf21a</i>        | chr2:92093116-92364666    | 12.0697  | 12.7862 | 0.0832  | 0.207946 |
| <i>Cds2</i>          | chr2:132263147-132312050  | 34.4075  | 31.5563 | -0.1248 | 0.185806 |
| <i>4921531C22Rik</i> | chr2:179975992-179979013  | 3.7938   | 4.5484  | 0.2617  | 0.406103 |
| <i>1810062G17Rik</i> | chr3:36475936-36482299    | 1.3222   | 1.8128  | 0.4553  | 0.181856 |
| <i>Zfp189</i>        | chr4:49521175-49531517    | 4.3029   | 4.7904  | 0.1548  | 0.149185 |
| <i>Fbxl18</i>        | chr5:142866945-142895421  | 1.2718   | 1.1026  | -0.2060 | 0.219142 |
| <i>Wasl</i>          | chr6:24613804-24665009    | 6.3986   | 7.1954  | 0.1693  | 0.421425 |
| <i>Rpsud3</i>        | chr6:113415318-113419348  | 5.2776   | 4.5842  | -0.2032 | 0.095365 |
| <i>Wnk1</i>          | chr6:119923968-120038672  | 24.0465  | 26.8077 | 0.1568  | 0.463611 |
| <i>Josd2</i>         | chr7:44467979-44471652    | 11.2377  | 12.0956 | 0.1061  | 0.181707 |
| <i>Gm22701</i>       | chr8:110498851-110499127  | 31.3043  | 53.9515 | 0.7853  | 0.240710 |
| <i>Slc25a14</i>      | chrX:48623412-48662294    | 3.3511   | 2.8611  | -0.2281 | 0.052784 |
| <i>Msl3</i>          | chrX:168654116-168673898  | 24.8991  | 26.4742 | 0.0885  | 0.158495 |
| <i>Cenpj</i>         | chr14:56526760-56571846   | 11.2789  | 12.0723 | 0.0981  | 0.189597 |
| <i>Tsc22d1</i>       | chr14:76414960-76507765   | 1.6614   | 1.4192  | -0.2273 | 0.262399 |
| <i>Rab40c</i>        | chr17:25882113-25919727   | 5.4951   | 4.7625  | -0.2064 | 0.212151 |
| <i>Tfpi</i>          | chr2:84432854-84476775    | 0.5394   | 0.7312  | 0.4389  | 0.316303 |
| <i>A1847159</i>      | chr2:129158665-129180667  | 4.7984   | 3.9269  | -0.2892 | 0.219495 |
| <i>Pgrmc2</i>        | chr3:41066325-41083046    | 7.9566   | 7.1657  | -0.1510 | 0.065541 |
| <i>Zgrf1</i>         | chr3:127553488-127618021  | 3.5811   | 3.9183  | 0.1298  | 0.316330 |
| <i>Sept8</i>         | chr11:53519256-53549565   | 0.4246   | 0.5838  | 0.4596  | 0.362588 |
| <i>Lman2</i>         | chr13:55343832-55362783   | 35.7655  | 33.0628 | -0.1134 | 0.112762 |
| <i>Fbxo24</i>        | chr5:137612502-137629002  | 1.9832   | 1.6337  | -0.2797 | 0.108726 |
| <i>Dbp</i>           | chr7:45705087-45710155    | 6.8664   | 7.5077  | 0.1288  | 0.185103 |
| <i>Deptor</i>        | chr15:55112316-55259271   | 0.1003   | 0.0638  | -0.6542 | 0.120845 |
| <i>Pigc</i>          | chr1:161969185-162027106  | 5.6934   | 6.1503  | 0.1114  | 0.066384 |
| <i>Cndp2</i>         | chr18:84667469-84685633   | 24.7629  | 22.1047 | -0.1638 | 0.231132 |
| <i>Cep128</i>        | chr12:90998491-91384409   | 1.5708   | 1.7143  | 0.1261  | 0.160642 |
| <i>NA</i>            | chr9:110037288-110040467  | 3.1492   | 3.6226  | 0.2020  | 0.329505 |
| <i>Gm16259</i>       | chr14:105292431-105292984 | 1.6256   | 2.2899  | 0.4943  | 0.100396 |
| <i>Prdm15</i>        | chr16:97791466-97851850   | 5.3536   | 4.8358  | -0.1468 | 0.146185 |
| <i>Ttbk2</i>         | chr2:120732815-120850604  | 1.4214   | 1.6116  | 0.1812  | 0.310299 |
| <i>Crb2</i>          | chr2:37776248-37799103    | 0.0854   | 0.1355  | 0.6656  | 0.252321 |
| <i>Abl2</i>          | chr1:156558785-156649568  | 10.5653  | 9.5840  | -0.1406 | 0.220590 |
| <i>Samd1</i>         | chr8:83997671-84000386    | 14.8034  | 16.2020 | 0.1302  | 0.288761 |
| <i>Zc3h8</i>         | chr2:128926267-128944077  | 10.3306  | 11.3195 | 0.1319  | 0.146734 |
| <i>Myl6b</i>         | chr10:128494156-128498685 | 3.9197   | 4.7009  | 0.2622  | 0.228921 |
| <i>Tgds</i>          | chr14:11811910-118132765  | 8.9651   | 7.9979  | -0.1647 | 0.055868 |
| <i>Gm26722</i>       | chr4:129309080-129318443  | 25.4184  | 22.1596 | -0.1979 | 0.230760 |
| <i>Pfkl</i>          | chr10:77986946-78010083   | 14.6535  | 13.2362 | -0.1467 | 0.159796 |
| <i>Gm4673</i>        | chr7:30957408-30961619    | 4.0803   | 4.4734  | 0.1327  | 0.111279 |
| <i>Hdgfrp3</i>       | chr7:81881250-81934473    | 18.7048  | 20.3545 | 0.1219  | 0.356569 |
| <i>Tmem80</i>        | chr7:141327738-141337156  | 9.5008   | 8.5707  | -0.1486 | 0.099780 |
| <i>Dgkh</i>          | chr14:78569608-78725089   | 1.2136   | 1.4808  | 0.2870  | 0.362459 |
| <i>Gabpb2</i>        | chr3:95181765-95217916    | 28.4091  | 26.3464 | -0.1088 | 0.109453 |
| <i>Emp1</i>          | chr6:135362930-135383173  | 0.4173   | 0.6018  | 0.5281  | 0.322175 |

|                      |                           |          |          |         |          |
|----------------------|---------------------------|----------|----------|---------|----------|
| <i>Chaf1b</i>        | chr16:93883900-93906115   | 5.1779   | 5.6362   | 0.1224  | 0.270352 |
| <i>Cdc3711</i>       | chr19:28990493-29017569   | 38.8224  | 35.4027  | -0.1330 | 0.145070 |
| <i>Mfn1</i>          | chr3:32529464-32579239    | 4.7771   | 4.2999   | -0.1518 | 0.090375 |
| <i>Zfr2</i>          | chr10:81233154-81252123   | 0.4842   | 0.3739   | -0.3732 | 0.221729 |
| <i>Iba57</i>         | chr11:59155368-59163739   | 2.9852   | 2.5793   | -0.2109 | 0.188159 |
| <i>Nudc</i>          | chr4:133532541-133545996  | 34.8530  | 39.1179  | 0.1665  | 0.371419 |
| <i>Fam120c</i>       | chrX:151344174-151471842  | 3.8553   | 3.4860   | -0.1453 | 0.001340 |
| <i>Chst11</i>        | chr10:82985497-83195900   | 3.4886   | 5.0367   | 0.5298  | 0.284106 |
| <i>Spag5</i>         | chr11:78301528-78322457   | 1.2587   | 1.5582   | 0.3080  | 0.421718 |
| <i>Cdc25a</i>        | chr9:109875578-109893888  | 8.1953   | 7.3846   | -0.1503 | 0.080490 |
| <i>Kifc2</i>         | chr15:76660640-76668196   | 4.7839   | 4.1860   | -0.1926 | 0.160023 |
| <i>Psmb5</i>         | chr14:54614119-54617995   | 22.7406  | 19.6680  | -0.2094 | 0.200451 |
| <i>Dst</i>           | chr1:33908224-34308652    | 0.1513   | 0.1202   | -0.3325 | 0.270615 |
| <i>Gm10822</i>       | chr2:73892995-73900850    | 0.4447   | 0.2821   | -0.6564 | 0.194628 |
| <i>Zmynd8</i>        | chr2:165784151-165899016  | 7.8308   | 8.5032   | 0.1188  | 0.377437 |
| <i>Marcks1</i>       | chr4:129513580-129515985  | 1.8612   | 2.3067   | 0.3096  | 0.258393 |
| <i>Sin3b</i>         | chr8:72723287-72758203    | 25.7353  | 23.5780  | -0.1263 | 0.089370 |
| <i>Anxa11</i>        | chr14:25842182-25886804   | 7.7421   | 6.9472   | -0.1563 | 0.151877 |
| <i>Traj18</i>        | chr14:54200776-54200842   | 47.3114  | 36.7214  | -0.3656 | 0.180723 |
| <i>Psmc5</i>         | chr11:106256153-106263120 | 44.7795  | 40.4982  | -0.1450 | 0.132867 |
| <i>Pdcd2l</i>        | chr7:34184498-34196661    | 11.6198  | 10.2657  | -0.1788 | 0.073078 |
| <i>Tjdp1</i>         | chr8:13339673-13377702    | 16.3477  | 17.5518  | 0.1025  | 0.149954 |
| <i>Gm26586</i>       | chr8:72137388-72140820    | 22.3488  | 24.3391  | 0.1231  | 0.280778 |
| <i>Fhod1</i>         | chr8:105329162-105347953  | 5.8557   | 5.2219   | -0.1653 | 0.180935 |
| <i>Chmp1a</i>        | chr8:123204263-123212763  | 25.1506  | 22.9791  | -0.1303 | 0.137396 |
| <i>Ccdc22</i>        | chrX:7593808-7605517      | 10.9856  | 9.4039   | -0.2243 | 0.298991 |
| <i>Lage3</i>         | chrX:74351275-74353618    | 7.2459   | 8.0878   | 0.1586  | 0.276864 |
| <i>Jpx</i>           | chrX:103493557-103506425  | 1.4033   | 1.6163   | 0.2038  | 0.231300 |
| <i>Rictor</i>        | chr15:6708380-6800398     | 53.9123  | 49.5665  | -0.1212 | 0.144966 |
| <i>Gm6034</i>        | chr17:36042960-36058645   | 0.6397   | 0.4239   | -0.5937 | 0.073179 |
| <i>Dus3l</i>         | chr17:56764750-56770092   | 25.2889  | 23.1071  | -0.1302 | 0.095929 |
| <i>Il1rap</i>        | chr16:26581703-26730117   | 2.4980   | 2.7555   | 0.1415  | 0.334431 |
| <i>Cpt1a</i>         | chr19:3323300-3385732     | 19.9182  | 22.5945  | 0.1819  | 0.433791 |
| <i>Tpx2</i>          | chr2:152847963-152895321  | 2.8223   | 3.8107   | 0.4332  | 0.313928 |
| <i>NA</i>            | chr2:26912847-26912915    | 16.3303  | 10.5579  | -0.6292 | 0.183038 |
| <i>Ptpdc1</i>        | chr13:48577872-48625573   | 0.4155   | 0.5727   | 0.4629  | 0.319955 |
| <i>Letm1</i>         | chr5:33739672-33782817    | 8.5340   | 7.7840   | -0.1327 | 0.169754 |
| <i>Nxn1</i>          | chr8:71560555-71566649    | 1.6050   | 1.3008   | -0.3032 | 0.130299 |
| <i>Wdr48</i>         | chr9:119894894-119926579  | 27.5174  | 28.8583  | 0.0686  | 0.144318 |
| <i>Gpank1</i>        | chr17:35121454-35124814   | 14.5695  | 16.1161  | 0.1456  | 0.320462 |
| <i>Kat2b</i>         | chr17:53566860-53672720   | 22.8355  | 20.8390  | -0.1320 | 0.165949 |
| <i>Ssh2</i>          | chr11:77216286-77460220   | 33.7227  | 35.9609  | 0.0927  | 0.388857 |
| <i>Gde1</i>          | chr7:118688544-118705778  | 19.9803  | 17.9205  | -0.1570 | 0.127635 |
| <i>Rab1</i>          | chr11:20201431-20226856   | 21.6766  | 19.6281  | -0.1432 | 0.177026 |
| <i>Cdc42se2</i>      | chr11:54717455-54787675   | 82.4319  | 76.2006  | -0.1134 | 0.090989 |
| <i>P2rx5</i>         | chr11:73160420-73172685   | 0.6613   | 0.4659   | -0.5054 | 0.189583 |
| <i>Mrps23</i>        | chr11:88204387-88211507   | 33.6496  | 36.5714  | 0.1201  | 0.300061 |
| <i>Rpl23</i>         | chr11:9777526-97782437    | 205.9481 | 266.7982 | 0.3735  | 0.275677 |
| <i>Crip1</i>         | chr12:113152011-113153877 | 343.8998 | 304.0681 | -0.1776 | 0.249771 |
| <i>Galnt11</i>       | chr5:25222881-25265918    | 14.9913  | 16.0949  | 0.1025  | 0.260684 |
| <i>Myo18b</i>        | chr5:112688875-112896362  | 0.1113   | 0.1716   | 0.6248  | 0.423614 |
| <i>Setd1b</i>        | chr5:123142192-123167435  | 1.8038   | 2.1769   | 0.2712  | 0.451317 |
| <i>Ap1f</i>          | chr6:87628428-87672168    | 2.9715   | 2.5497   | -0.2208 | 0.104903 |
| <i>Mapk3</i>         | chr7:126759600-126765819  | 6.9747   | 7.8070   | 0.1627  | 0.270376 |
| <i>Zfp771</i>        | chr7:127244525-127254803  | 5.0823   | 4.1673   | -0.2864 | 0.232113 |
| <i>Irs2</i>          | chr8:10986979-11008458    | 5.5779   | 6.4247   | 0.2039  | 0.397953 |
| <i>Hp</i>            | chr8:109575129-109579172  | 0.4867   | 0.7558   | 0.6351  | 0.338475 |
| <i>Def8</i>          | chr8:123442985-123463270  | 3.9130   | 3.4643   | -0.1757 | 0.050243 |
| <i>PrkcsH</i>        | chr9:22003034-22014219    | 41.1215  | 37.6395  | -0.1276 | 0.149135 |
| <i>Dag1</i>          | chr9:108205954-108263924  | 4.7160   | 5.3352   | 0.1780  | 0.364778 |
| <i>9530027J09Rik</i> | chrX:48276791-48285426    | 17.4041  | 19.0395  | 0.1296  | 0.269833 |
| <i>Tmsb15b1</i>      | chrX:136974021-136976874  | 5.6024   | 4.0230   | -0.4778 | 0.252066 |
| <i>Drosha</i>        | chr15:12824814-12935290   | 6.2139   | 6.6596   | 0.0999  | 0.190615 |
| <i>Gm26884</i>       | chr15:79689139-79692385   | 2.6138   | 2.1993   | -0.2491 | 0.164736 |
| <i>Fhit</i>          | chr14:9550091-11162035    | 1.5029   | 1.1223   | -0.4214 | 0.133232 |
| <i>Gm25328</i>       | chr14:20701522-20701629   | 8.7579   | 11.9571  | 0.4492  | 0.018951 |
| <i>NA</i>            | chr17:15010265-15022448   | 0.5534   | 0.3429   | -0.6904 | 0.133123 |
| <i>Gm20683</i>       | chr17:25834464-25841763   | 15.2299  | 13.7721  | -0.1452 | 0.153658 |
| <i>Stk25</i>         | chr1:93621901-93635722    | 26.4310  | 24.2183  | -0.1261 | 0.080122 |
| <i>Kifap3</i>        | chr1:163779582-163917109  | 2.4910   | 2.1469   | -0.2145 | 0.113300 |
| <i>Ctnna1</i>        | chr18:35118887-35254773   | 8.0273   | 8.7621   | 0.1264  | 0.305728 |

|                       |                           |          |          |         |          |
|-----------------------|---------------------------|----------|----------|---------|----------|
| <i>Mex3c</i>          | chr18:73573043-73592575   | 24.6279  | 22.4405  | -0.1342 | 0.130475 |
| <i>Spo11</i>          | chr2:172977699-172993576  | 5.3091   | 4.5949   | -0.2084 | 0.250139 |
| <i>Ss18l1</i>         | chr2:180042508-180070201  | 4.1158   | 3.6756   | -0.1632 | 0.050800 |
| <i>Cd1d2</i>          | chr3:86986585-86989533    | 0.4951   | 0.7658   | 0.6294  | 0.186813 |
| <i>Hdgf</i>           | chr3:87906320-87916132    | 41.3050  | 44.4502  | 0.1059  | 0.325422 |
| <i>Tm2d1</i>          | chr4:98355369-98383306    | 8.2588   | 9.1895   | 0.1541  | 0.034640 |
| <i>Dph2</i>           | chr4:117888642-117892032  | 11.4885  | 10.1878  | -0.1734 | 0.212215 |
| <i>Epb4.1</i>         | chr4:131923412-132075321  | 21.7751  | 22.9475  | 0.0757  | 0.241037 |
| <i>Trav1</i>          | chr14:52427927-52428874   | 1.4535   | 2.4786   | 0.7700  | 0.182168 |
| <i>Hcfc1r1</i>        | chr17:23673595-23675227   | 10.3643  | 12.2832  | 0.2451  | 0.362696 |
| <i>Hdac1</i>          | chr4:129516103-129542713  | 6.2959   | 5.6495   | -0.1563 | 0.072236 |
| <i>AW209491</i>       | chr13:14630244-14638202   | 6.0955   | 5.2948   | -0.2032 | 0.130166 |
| <i>Anxa7</i>          | chr14:20455260-20480133   | 29.6521  | 31.5194  | 0.0881  | 0.189502 |
| <i>Slc25a30</i>       | chr14:75761998-75787037   | 24.6912  | 22.4328  | -0.1384 | 0.078528 |
| <i>Trappc10</i>       | chr10:78186724-78244642   | 27.8725  | 25.7004  | -0.1171 | 0.138929 |
| <i>VeZF1</i>          | chr11:88068278-88084729   | 22.3336  | 23.6315  | 0.0815  | 0.211560 |
| <i>Coil</i>           | chr11:88970251-88991613   | 6.3653   | 5.6836   | -0.1634 | 0.106161 |
| <i>F2rl2</i>          | chr13:95696852-95702739   | 1.8519   | 2.2501   | 0.2810  | 0.351110 |
| <i>Tmem120a</i>       | chr5:135735484-135744271  | 8.0518   | 8.9672   | 0.1553  | 0.222971 |
| <i>Dnaja4</i>         | chr9:54698872-54716315    | 3.5779   | 3.9519   | 0.1434  | 0.150407 |
| <i>Trav15-1-dv6-1</i> | chr14:53559675-53560247   | 7.9169   | 9.5621   | 0.2724  | 0.022431 |
| <i>Traj25</i>         | chr14:54194814-54194871   | 47.0326  | 35.3983  | -0.4100 | 0.229083 |
| <i>Atg3</i>           | chr16:45158784-45188538   | 21.9450  | 23.8503  | 0.1201  | 0.329229 |
| <i>Gbe1</i>           | chr16:70313948-70569716   | 6.2090   | 6.6896   | 0.1076  | 0.201817 |
| <i>Hdlbp</i>          | chr1:93405939-93478808    | 30.2102  | 31.7009  | 0.0695  | 0.190261 |
| <i>Invs</i>           | chr4:48279759-48431954    | 3.9638   | 3.6235   | -0.1295 | 0.062803 |
| <i>Atp2a3</i>         | chr11:72961168-72993044   | 71.5502  | 65.3037  | -0.1318 | 0.231185 |
| <i>Stambp</i>         | chr6:83543205-83572504    | 2.6137   | 3.0913   | 0.2421  | 0.275141 |
| <i>Notch4</i>         | chr17:34564267-34588503   | 1.3989   | 1.2040   | -0.2165 | 0.178627 |
| <i>Jmjd6</i>          | chr11:116837431-116843449 | 21.7388  | 20.0692  | -0.1153 | 0.057931 |
| <i>Naa30</i>          | chr14:49172225-49191031   | 18.4097  | 16.9046  | -0.1231 | 0.135462 |
| <i>Tmem50b</i>        | chr16:91574502-91597800   | 10.8972  | 11.8633  | 0.1225  | 0.212675 |
| <i>6030442K20Rik</i>  | chr1:132466432-132477045  | 1.1513   | 1.4858   | 0.3680  | 0.223818 |
| <i>Rpl12</i>          | chr2:32961558-32964496    | 36.4503  | 32.8613  | -0.1495 | 0.184325 |
| <i>Ube2r2</i>         | chr4:41135742-41193380    | 17.7585  | 19.1447  | 0.1084  | 0.296002 |
| <i>Traj39</i>         | chr14:54179961-54180024   | 50.3638  | 40.4289  | -0.3170 | 0.025763 |
| <i>Mx2</i>            | chr16:97536082-97560899   | 3.2220   | 4.8523   | 0.5907  | 0.254911 |
| <i>Pik3cd</i>         | chr4:149649167-149702571  | 176.8182 | 163.9761 | -0.1088 | 0.129000 |
| <i>R74862</i>         | chr7:143021783-143053686  | 0.6372   | 0.8258   | 0.3739  | 0.342573 |
| <i>Comm4</i>          | chr9:57155040-57158299    | 44.9815  | 40.0926  | -0.1660 | 0.186577 |
| <i>Vcp-rs</i>         | chrX:104345828-104348234  | 1.8385   | 2.2225   | 0.2737  | 0.265130 |
| <i>Adcy3</i>          | chr12:4133102-4213525     | 12.4228  | 11.4515  | -0.1175 | 0.098490 |
| <i>Atm</i>            | chr9:53439148-53536740    | 45.8382  | 41.7847  | -0.1336 | 0.205137 |
| <i>Limd1</i>          | chr9:123478700-123521548  | 41.4541  | 38.4280  | -0.1094 | 0.076451 |
| <i>Utp14b</i>         | chr1:78658037-78667588    | 2.0148   | 1.7111   | -0.2357 | 0.110207 |
| <i>2410006H16Rik</i>  | chr11:62602876-62604807   | 130.9621 | 142.9405 | 0.1263  | 0.346705 |
| <i>Kcnk6</i>          | chr7:29221927-29232522    | 0.5097   | 0.6828   | 0.4219  | 0.294015 |
| <i>Gm15790</i>        | chr1:129796607-129797858  | 0.4834   | 0.7155   | 0.5657  | 0.067960 |
| <i>Psmg3</i>          | chr5:139823591-139826885  | 4.4661   | 3.8202   | -0.2254 | 0.221215 |
| <i>Trav4-3</i>        | chr14:53598907-53599410   | 5.0858   | 3.7143   | -0.4534 | 0.119170 |
| <i>Myrf</i>           | chr19:10208271-10240748   | 0.6298   | 0.5082   | -0.3095 | 0.041814 |
| <i>Praf2</i>          | chrX:7728438-7731064      | 5.5130   | 6.4234   | 0.2205  | 0.308574 |
| <i>Npepl1</i>         | chr2:174110348-174123070  | 31.4306  | 33.5654  | 0.0948  | 0.334395 |
| <i>Rsph9</i>          | chr17:46122034-46144216   | 0.3862   | 0.5973   | 0.6289  | 0.337401 |
| <i>Tbrg1</i>          | chr9:37649181-37657312    | 42.7925  | 45.3164  | 0.0827  | 0.259827 |
| <i>Arhgap30</i>       | chr1:171388953-171410298  | 134.0023 | 124.2583 | -0.1089 | 0.072315 |
| <i>Gm561</i>          | chr2:144594053-144595366  | 10.8038  | 8.4512   | -0.3543 | 0.268532 |
| <i>Eij5a</i>          | chr11:69916713-69921958   | 73.0164  | 78.4282  | 0.1032  | 0.342963 |
| <i>Pitpna</i>         | chr11:75588096-75628804   | 46.3258  | 49.8928  | 0.1070  | 0.352937 |
| <i>Appbp2os</i>       | chr11:85235170-85238304   | 3.8340   | 4.8282   | 0.3326  | 0.269010 |
| <i>Rnaseh1</i>        | chr12:28649601-28659591   | 21.0071  | 22.7694  | 0.1162  | 0.272083 |
| <i>Sav1</i>           | chr12:69965011-69987002   | 8.4490   | 9.2768   | 0.1348  | 0.267013 |
| <i>Prox2os</i>        | chr12:85086373-85088228   | 1.9021   | 2.3586   | 0.3103  | 0.057044 |
| <i>Crmp1</i>          | chr5:37242079-37292132    | 0.3891   | 0.5116   | 0.3948  | 0.152893 |
| <i>Zcchc4</i>         | chr5:52775408-52824665    | 3.8039   | 3.4661   | -0.1341 | 0.069925 |
| <i>Ythdc1</i>         | chr5:86804220-86836659    | 35.5995  | 32.5043  | -0.1312 | 0.183330 |
| <i>Utp3</i>           | chr5:88554482-88556083    | 44.7330  | 49.9390  | 0.1588  | 0.379089 |
| <i>Gm15846</i>        | chr5:122438595-122438915  | 2.6320   | 3.7236   | 0.5005  | 0.076284 |
| <i>Zfp664</i>         | chr5:124862690-124902693  | 9.3532   | 8.4470   | -0.1470 | 0.186441 |
| <i>Mrpl51</i>         | chr6:125191800-125195583  | 8.4849   | 9.3255   | 0.1363  | 0.303552 |
| <i>Coa4</i>           | chr7:100537099-100540369  | 5.7775   | 6.6565   | 0.2043  | 0.275392 |



|          |                           |          |          |         |          |
|----------|---------------------------|----------|----------|---------|----------|
| Gm10073  | chr8:106572965-106573461  | 5.9058   | 7.3661   | 0.3188  | 0.232400 |
| Adamts7  | chr9:90162977-90208071    | 0.5794   | 0.7134   | 0.3003  | 0.365368 |
| Crtap    | chr9:114375133-114390675  | 4.8354   | 4.1813   | -0.2097 | 0.041108 |
| Mid1ip1  | chrX:10715012-10719690    | 8.8507   | 9.5998   | 0.1172  | 0.120629 |
| Gm14584  | chrX:53418330-53418967    | 1.9234   | 2.6168   | 0.4441  | 0.246532 |
| Cxx1b    | chrX:53669177-53670408    | 2.0164   | 1.5283   | -0.3999 | 0.149651 |
| Gpm6b    | chrX:166238910-166388988  | 1.0237   | 1.1912   | 0.2187  | 0.287009 |
| Rpl15    | chr14:18267822-18271391   | 15.9267  | 17.4108  | 0.1285  | 0.307335 |
| BC051537 | chr17:34083842-34095309   | 4.2214   | 3.5931   | -0.2325 | 0.053390 |
| Mad2l1bp | chr17:46147389-46153553   | 16.0162  | 14.2416  | -0.1694 | 0.123616 |
| Pank1    | chr19:34810893-34879455   | 0.9742   | 0.7590   | -0.3600 | 0.221229 |
| Nuf2     | chr1:169497933-169531464  | 1.8038   | 2.2803   | 0.3382  | 0.425766 |
| Gm26850  | chr3:63963632-63968659    | 5.7072   | 4.9897   | -0.1938 | 0.174948 |
| Zranb3   | chr1:127954183-128103047  | 1.8082   | 2.0709   | 0.1957  | 0.377482 |
| Cd302    | chr2:60251992-60284488    | 3.1457   | 2.5507   | -0.3025 | 0.151523 |
| Pkig     | chr2:163658385-163726158  | 0.5713   | 0.4282   | -0.4162 | 0.175229 |
| Gm25296  | chr11:48800865-48800932   | 32.6502  | 40.5140  | 0.3113  | 0.088792 |
| Rims3    | chr4:120854815-120896579  | 0.4432   | 0.5338   | 0.2683  | 0.162646 |
| Pts      | chr9:50521617-50528641    | 49.9554  | 44.9391  | -0.1527 | 0.170188 |
| Dnajc16  | chr4:141760188-141790931  | 5.2458   | 4.7247   | -0.1509 | 0.170877 |
| Gm11870  | chr4:16011004-16012326    | 3.9379   | 4.6299   | 0.2335  | 0.251191 |
| Nfat5    | chr8:107293469-107379517  | 3.4022   | 3.8252   | 0.1690  | 0.463156 |
| Itm2c    | chr1:85894280-85908675    | 32.2497  | 34.5361  | 0.0988  | 0.303761 |
| Zcchc2   | chr1:105990405-106034074  | 16.0920  | 17.3699  | 0.1102  | 0.398710 |
| Oscp1    | chr4:126058564-126092195  | 0.1784   | 0.1111   | -0.6831 | 0.173298 |
| Mapre1   | chr2:153741273-153773310  | 21.3366  | 22.4672  | 0.0745  | 0.193123 |
| Fancg    | chr4:43002342-43010506    | 4.6276   | 4.0874   | -0.1791 | 0.150701 |
| Bphl     | chr13:34037640-34074074   | 7.6363   | 6.6054   | -0.2092 | 0.078220 |
| Mttr12   | chr15:12205027-12272240   | 21.1290  | 22.0111  | 0.0590  | 0.090981 |
| Suv39h2  | chr2:3455814-3475031      | 2.3912   | 2.6502   | 0.1484  | 0.171209 |
| Gm17090  | chr1:91305091-91321101    | 8.0610   | 6.4565   | -0.3202 | 0.155166 |
| Atp1b3   | chr9:96332679-96364299    | 360.0637 | 373.0381 | 0.0511  | 0.175830 |
| Mapk1ip1 | chr7:138835822-138846273  | 9.8768   | 10.8556  | 0.1363  | 0.277911 |
| Gm26610  | chr7:30650384-30652711    | 1.1703   | 1.6512   | 0.4966  | 0.293533 |
| Gm16044  | chr7:128692688-128693138  | 3.9761   | 5.0992   | 0.3589  | 0.183459 |
| Fam199x  | chrX:137049593-137082503  | 5.4801   | 4.9677   | -0.1416 | 0.137499 |
| Zfp451   | chr1:33760471-33814595    | 6.9118   | 6.2975   | -0.1343 | 0.203543 |
| Rps20    | chr4:3831333-3835665      | 85.3618  | 73.7350  | -0.2112 | 0.340677 |
| Usp24    | chr4:106316212-106441322  | 33.9947  | 31.2583  | -0.1211 | 0.164823 |
| Pdcd1g2  | chr19:29410918-29471157   | 0.7089   | 0.9611   | 0.4391  | 0.210943 |
| Mylpf    | chr7:127211607-127214298  | 9.7158   | 8.3106   | -0.2254 | 0.145215 |
| Cmtm6    | chr9:114731202-114749343  | 57.1903  | 53.4325  | -0.0981 | 0.037295 |
| ldh3g    | chrX:73778962-73786897    | 42.4956  | 44.8863  | 0.0790  | 0.250690 |
| Gm371    | chrX:94997438-94998683    | 1.1614   | 1.5202   | 0.3884  | 0.154345 |
| Wipi2    | chr5:142629541-142670588  | 12.2620  | 11.2335  | -0.1264 | 0.150617 |
| Nudt15   | chr14:73519863-73548242   | 0.5177   | 0.6905   | 0.4153  | 0.195924 |
| Slc18a2  | chr19:59260877-59296012   | 3.4487   | 4.0282   | 0.2241  | 0.445378 |
| Apbb1ip  | chr2:22774093-22875653    | 12.1156  | 13.3429  | 0.1392  | 0.454678 |
| Vav2     | chr2:27262103-27427033    | 1.6099   | 1.3862   | -0.2158 | 0.189095 |
| Lrrc41   | chr4:116075268-116097043  | 9.5838   | 8.6858   | -0.1419 | 0.117321 |
| Ctp      | chr4:155864722-155869440  | 5.2437   | 5.8073   | 0.1473  | 0.268547 |
| Gpr107   | chr2:31152315-31219548    | 6.1527   | 5.5534   | -0.1479 | 0.221844 |
| Crb3     | chr17:57059104-57065918   | 0.7672   | 0.5280   | -0.5392 | 0.138305 |
| Pld4     | chr12:112760654-112768986 | 0.6521   | 0.8652   | 0.4079  | 0.146258 |
| Cradd    | chr10:95174745-95324097   | 2.6939   | 2.2419   | -0.2650 | 0.010784 |
| Spats2l  | chr1:57774161-57948394    | 0.2302   | 0.1499   | -0.6186 | 0.426948 |
| NA       | chr11:85234774-85235223   | 5.0638   | 3.8910   | -0.3801 | 0.056743 |
| Poldip3  | chr15:83125977-83149384   | 28.5283  | 26.6279  | -0.0995 | 0.027148 |
| Hibadh   | chr6:52546227-52640389    | 19.3865  | 17.6605  | -0.1345 | 0.078244 |
| Ift88os  | chr14:57506743-57510835   | 0.3215   | 0.4824   | 0.5853  | 0.170948 |
| Mon2     | chr10:122992060-123076505 | 17.0772  | 15.8253  | -0.1098 | 0.099926 |
| Chid1    | chr7:141493135-141539857  | 3.5685   | 3.2277   | -0.1448 | 0.157661 |
| Olfm2    | chr9:20667985-20728219    | 1.1756   | 0.8347   | -0.4941 | 0.218241 |
| Laptm4b  | chr15:34238025-34284295   | 0.8213   | 0.5706   | -0.5255 | 0.233367 |
| Traj31   | chr14:54187894-54187951   | 107.6031 | 91.5094  | -0.2337 | 0.033063 |
| Mettl5   | chr2:69871197-69885615    | 15.7380  | 14.0272  | -0.1660 | 0.209424 |
| Triap1   | chr5:115341224-115343569  | 13.2245  | 11.3414  | -0.2216 | 0.229005 |
| Gm12737  | chr4:108513780-108516817  | 3.9955   | 4.9234   | 0.3013  | 0.212906 |
| Rnd2     | chr11:101464998-101471853 | 0.6730   | 0.9031   | 0.4243  | 0.186557 |
| Vcpkmt   | chr12:69577627-69583028   | 9.3302   | 10.5801  | 0.1814  | 0.310864 |
| Atxn1    | chr13:45549757-45964991   | 5.0857   | 5.7648   | 0.1808  | 0.462747 |

|                      |                           |           |           |         |          |
|----------------------|---------------------------|-----------|-----------|---------|----------|
| <i>Secisbp2</i>      | chr13:51651696-51684044   | 19.8583   | 18.4348   | -0.1073 | 0.056856 |
| <i>4833439L19Rik</i> | chr13:54551217-54565435   | 11.9159   | 10.8769   | -0.1316 | 0.089823 |
| <i>Helq</i>          | chr5:100762144-100798598  | 4.7325    | 4.2776    | -0.1458 | 0.064553 |
| <i>Snrnp35</i>       | chr5:124483133-124491124  | 3.0388    | 3.5989    | 0.2441  | 0.185389 |
| <i>Ints1</i>         | chr5:139751281-139775678  | 17.2258   | 15.5223   | -0.1502 | 0.272839 |
| <i>4930599N23Rik</i> | chr6:39118407-39148312    | 8.3002    | 7.3692    | -0.1716 | 0.119008 |
| <i>Tgfb1i1</i>       | chr7:128246811-128253712  | 0.6319    | 0.4828    | -0.3882 | 0.116842 |
| <i>Gtpbp3</i>        | chr8:71488102-71499583    | 6.9914    | 6.3726    | -0.1337 | 0.015487 |
| <i>Tmem184c</i>      | chr8:77595981-77610698    | 13.5044   | 14.6534   | 0.1178  | 0.280880 |
| <i>Pla2g15</i>       | chr8:106150398-106164713  | 3.7150    | 3.2122    | -0.2098 | 0.138541 |
| <i>Tmod3</i>         | chr9:75497795-75559657    | 73.3306   | 79.1940   | 0.1110  | 0.349214 |
| <i>Basp1</i>         | chr15:25363284-25413764   | 3.8138    | 4.7381    | 0.3131  | 0.390755 |
| <i>Ptk2</i>          | chr15:73205104-73423191   | 0.6987    | 0.5506    | -0.3437 | 0.221673 |
| <i>Slc48a1</i>       | chr15:97784354-97792692   | 8.5869    | 9.3379    | 0.1210  | 0.258237 |
| <i>9930012K11Rik</i> | chr14:70154404-70159502   | 3.4846    | 2.9577    | -0.2365 | 0.172799 |
| <i>Ppp3cc</i>        | chr14:70217897-70289449   | 62.3567   | 66.5399   | 0.0937  | 0.346580 |
| <i>Cnm2</i>          | chr19:46761595-46878795   | 2.7130    | 2.3339    | -0.2172 | 0.167606 |
| <i>Rnf25</i>         | chr1:74593747-74601397    | 14.4260   | 15.3835   | 0.0927  | 0.087789 |
| <i>Ppp2r5a</i>       | chr1:191351980-191397041  | 156.6873  | 144.5254  | -0.1166 | 0.129706 |
| <i>Nek2</i>          | chr1:191821443-191833050  | 1.1230    | 1.4668    | 0.3852  | 0.438263 |
| <i>Mamdc4</i>        | chr2:25563114-25574845    | 6.5773    | 5.9191    | -0.1521 | 0.114727 |
| <i>Gm13588</i>       | chr2:38490103-38490238    | 8.4472    | 18.4329   | 1.1257  | 0.215290 |
| <i>Gm9889</i>        | chr3:115715149-115716727  | 5.4619    | 6.2167    | 0.1867  | 0.287331 |
| <i>Alg14</i>         | chr3:121291816-121362011  | 6.5865    | 7.4686    | 0.1813  | 0.022609 |
| <i>Ndufaf6</i>       | chr4:11051044-11076205    | 4.6198    | 5.2878    | 0.1948  | 0.163460 |
| <i>Ptch2</i>         | chr4:117096074-117116101  | 0.1790    | 0.1226    | -0.5465 | 0.048969 |
| <i>Zfp683</i>        | chr4:134053837-134058996  | 3.0491    | 3.5565    | 0.2221  | 0.185556 |
| <i>Rsg1</i>          | chr4:141213955-141226756  | 0.9901    | 0.7497    | -0.4013 | 0.011823 |
| <i>Igfbp7</i>        | chr5:77349239-77408045    | 0.8033    | 0.5102    | -0.6547 | 0.185675 |
| <i>Akip1</i>         | chr7:109703689-109712189  | 8.2711    | 9.1700    | 0.1489  | 0.126360 |
| <i>Gm22009</i>       | chr3:69085104-69085447    | 5037.4057 | 6359.6424 | 0.3363  | 0.297869 |
| <i>Zfp629</i>        | chr7:127607030-127615797  | 1.4386    | 1.2368    | -0.2181 | 0.159036 |
| <i>Gm11579</i>       | chr1:60776664-60781834    | 3.5044    | 4.2813    | 0.2889  | 0.279833 |
| <i>Zfp703</i>        | chr8:26977335-26981461    | 0.5556    | 0.7184    | 0.3706  | 0.226589 |
| <i>Cops5</i>         | chr1:10024601-10038127    | 19.0105   | 17.2375   | -0.1412 | 0.170948 |
| <i>Gm26771</i>       | chr3:83773852-83789956    | 3.5946    | 2.9176    | -0.3010 | 0.091860 |
| <i>Sesn1</i>         | chr10:41810573-41908424   | 50.8956   | 46.6795   | -0.1248 | 0.145908 |
| <i>Helb</i>          | chr10:120083607-120112987 | 17.5423   | 16.3110   | -0.1050 | 0.032051 |
| <i>Top3a</i>         | chr11:60740057-60777365   | 9.3447    | 8.5947    | -0.1207 | 0.010614 |
| <i>Cyp51</i>         | chr5:4081144-4104746      | 13.5595   | 11.9573   | -0.1814 | 0.301086 |
| <i>Galnt2</i>        | chr8:124231390-124345724  | 36.7055   | 33.7706   | -0.1202 | 0.162127 |
| <i>Ilf3</i>          | chr9:21368018-21405361    | 24.6714   | 25.8402   | 0.0668  | 0.196914 |
| <i>Zkscan7</i>       | chr9:12288470-122896124   | 7.4965    | 6.5685    | -0.1906 | 0.206392 |
| <i>Utp14a</i>        | chrX:48256861-48282453    | 29.0811   | 31.1760   | 0.1004  | 0.315406 |
| <i>Phf8</i>          | chrX:151520671-151633859  | 8.7346    | 9.2144    | 0.0772  | 0.279819 |
| <i>Zfp946</i>        | chr17:22424221-22456689   | 1.4648    | 1.7205    | 0.2321  | 0.195715 |
| <i>Lin9</i>          | chr1:180641149-180690518  | 8.9171    | 9.7316    | 0.1261  | 0.289450 |
| <i>Phyhd1</i>        | chr2:30266202-30301080    | 5.9872    | 5.3368    | -0.1659 | 0.089589 |
| <i>E2f2</i>          | chr4:136172393-136196057  | 6.8558    | 6.0759    | -0.1742 | 0.261921 |
| <i>Rpl3</i>          | chr15:80077780-80083406   | 86.3021   | 96.8524   | 0.1664  | 0.434729 |
| <i>Mlec</i>          | chr5:115142980-115158179  | 54.0944   | 50.7699   | -0.0915 | 0.051202 |
| <i>Hivep2</i>        | chr10:13966378-14151376   | 21.0156   | 22.3566   | 0.0892  | 0.407591 |
| <i>Gm26740</i>       | chr10:22187012-22302835   | 52.5105   | 48.0780   | -0.1272 | 0.184651 |
| <i>Ascc3</i>         | chr10:50592668-50851202   | 34.1506   | 36.1108   | 0.0805  | 0.317388 |
| <i>Tysnd1</i>        | chr10:61695513-61702773   | 13.4827   | 12.2479   | -0.1386 | 0.097437 |
| <i>Gucd1</i>         | chr10:75351110-75517972   | 13.0272   | 11.8818   | -0.1328 | 0.153672 |
| <i>Appl2</i>         | chr10:83600032-83648738   | 20.0946   | 18.3446   | -0.1315 | 0.165285 |
| <i>Gm25745</i>       | chr10:86705315-86705448   | 16.2544   | 12.2630   | -0.4065 | 0.169066 |
| <i>Gm11969</i>       | chr11:6182678-6183034     | 2.3752    | 3.3552    | 0.4983  | 0.181731 |
| <i>Mpg</i>           | chr11:32226504-32232700   | 8.1299    | 8.7582    | 0.1074  | 0.295204 |
| <i>Vdac1</i>         | chr11:52360859-52389397   | 20.7988   | 22.2321   | 0.0961  | 0.285293 |
| <i>Map2k3os</i>      | chr11:60920916-60931867   | 0.9795    | 0.6978    | -0.4893 | 0.049696 |
| <i>Ulk2</i>          | chr11:61775648-61855073   | 14.3951   | 15.2174   | 0.0801  | 0.309112 |
| <i>Akap10</i>        | chr11:61871306-61930252   | 13.7204   | 12.4004   | -0.1459 | 0.232827 |
| <i>Ttc19</i>         | chr11:62281472-62328451   | 6.7139    | 7.3043    | 0.1216  | 0.357233 |
| <i>Per1</i>          | chr11:69095216-69109960   | 3.1098    | 3.4258    | 0.1396  | 0.313029 |
| <i>Gp1ba</i>         | chr11:70639121-70642036   | 3.2232    | 2.8079    | -0.1990 | 0.019626 |
| <i>Wdr81</i>         | chr11:75440943-75454717   | 7.9787    | 7.1861    | -0.1510 | 0.250176 |
| <i>Msl1</i>          | chr11:98795515-98807859   | 22.0659   | 20.3417   | -0.1174 | 0.151267 |
| <i>Jup</i>           | chr11:100368957-100397763 | 0.4403    | 0.3496    | -0.3330 | 0.073009 |
| <i>Caskin2</i>       | chr11:115799182-115813639 | 0.3468    | 0.4365    | 0.3318  | 0.180750 |

|                      |                           |          |          |         |          |
|----------------------|---------------------------|----------|----------|---------|----------|
| <i>Sept9</i>         | chr11:117199660-117362325 | 45.7055  | 42.0081  | -0.1217 | 0.177748 |
| <i>Gm11767</i>       | chr11:119935802-119942698 | 3.2735   | 2.3360   | -0.4868 | 0.205570 |
| <i>Strn3</i>         | chr12:51608540-51691914   | 27.4473  | 28.9753  | 0.0782  | 0.215470 |
| <i>Arhgap5</i>       | chr12:52516076-52567852   | 10.0705  | 10.8853  | 0.1123  | 0.299737 |
| <i>Psm3</i>          | chr12:70974620-70996347   | 10.0119  | 8.9649   | -0.1594 | 0.216552 |
| <i>Gskip</i>         | chr12:105685351-105703047 | 8.8325   | 7.8874   | -0.1633 | 0.144167 |
| <i>Cdca4</i>         | chr12:112820236-112829389 | 33.5916  | 31.0604  | -0.1130 | 0.065223 |
| <i>Crip2</i>         | chr12:113140235-113145504 | 0.8613   | 1.1631   | 0.4335  | 0.192613 |
| <i>Cdca7l</i>        | chr12:117804288-117878706 | 16.4392  | 17.5592  | 0.0951  | 0.306513 |
| <i>Pfkip</i>         | chr13:6579767-6648777     | 28.8035  | 30.0211  | 0.0597  | 0.327008 |
| <i>Hist1h4b</i>      | chr13:23756936-23757427   | 18.3797  | 15.7639  | -0.2215 | 0.186887 |
| <i>Uqcrfs1</i>       | chr13:30540307-30545362   | 48.8653  | 43.4787  | -0.1685 | 0.245705 |
| <i>Lym4</i>          | chr13:35978796-36117357   | 8.7771   | 9.6841   | 0.1419  | 0.208064 |
| <i>Ssr1</i>          | chr13:37971400-37994190   | 14.2408  | 14.8092  | 0.0565  | 0.132388 |
| <i>Slc35b3</i>       | chr13:38932139-38960875   | 24.2827  | 22.0094  | -0.1418 | 0.195041 |
| <i>Ninj1</i>         | chr13:49187484-49196244   | 3.7439   | 4.3873   | 0.2288  | 0.329868 |
| <i>Gm25394</i>       | chr13:49684300-49684433   | 37.0254  | 21.7778  | -0.7657 | 0.272577 |
| <i>Ctla2b</i>        | chr13:60895350-60897447   | 11.8388  | 13.9372  | 0.2354  | 0.420154 |
| <i>9430065F17Rik</i> | chr13:67553233-67564009   | 0.6414   | 0.9141   | 0.5112  | 0.279148 |
| <i>Pde8b</i>         | chr13:95024453-95250336   | 0.4583   | 0.5661   | 0.3046  | 0.316966 |
| <i>Pik3r1</i>        | chr13:101680760-101768217 | 49.4950  | 46.0191  | -0.1051 | 0.092011 |
| <i>Gzma</i>          | chr13:113093824-113100979 | 22.7512  | 36.0233  | 0.6630  | 0.271975 |
| <i>Paip1</i>         | chr13:119428600-119458218 | 22.0617  | 20.0494  | -0.1380 | 0.191473 |
| <i>Crygn</i>         | chr5:24751002-24758008    | 1.8058   | 2.3561   | 0.3837  | 0.207723 |
| <i>Xrcc2</i>         | chr5:25689811-25705825    | 1.9664   | 1.6687   | -0.2368 | 0.276502 |
| <i>Gm15820</i>       | chr5:54094000-54095041    | 2.2956   | 2.9442   | 0.3590  | 0.146769 |
| <i>Cops4</i>         | chr5:100518308-100547803  | 14.0534  | 15.0912  | 0.1028  | 0.316391 |
| <i>Pcgf3</i>         | chr5:108461231-108506976  | 5.7184   | 6.0805   | 0.0886  | 0.278903 |
| <i>Gm26718</i>       | chr5:110259162-110269847  | 27.7072  | 25.1294  | -0.1409 | 0.109066 |
| <i>Tesc</i>          | chr5:118027742-118061878  | 4.7585   | 3.9045   | -0.2854 | 0.294341 |
| <i>Rnft2</i>         | chr5:118190735-118245116  | 0.1163   | 0.1779   | 0.6131  | 0.283475 |
| <i>Ptpn11</i>        | chr5:121130532-121191397  | 15.1970  | 14.2227  | -0.0956 | 0.004804 |
| <i>Pitpnm2</i>       | chr5:124118689-124249760  | 3.9197   | 4.3126   | 0.1378  | 0.439527 |
| <i>Kctd7</i>         | chr5:130144860-130155806  | 1.2496   | 1.0556   | -0.2434 | 0.038910 |
| <i>Zkscan1</i>       | chr5:138085083-138107822  | 16.2819  | 17.0633  | 0.0676  | 0.157662 |
| <i>Cnpy4</i>         | chr5:138187484-138193918  | 11.4284  | 10.2234  | -0.1608 | 0.156047 |
| <i>Akr1b3</i>        | chr6:34303933-34317497    | 7.6300   | 6.8419   | -0.1573 | 0.143859 |
| <i>Trbj1-6</i>       | chr6:41535553-41535606    | 301.5388 | 328.7165 | 0.1245  | 0.238197 |
| <i>Repin1</i>        | chr6:48593882-48599082    | 0.8063   | 1.0181   | 0.3366  | 0.322427 |
| <i>Fbxo41</i>        | chr6:85469573-85502994    | 0.3084   | 0.4076   | 0.4024  | 0.357356 |
| <i>Fancd2</i>        | chr6:113531681-113597017  | 0.6838   | 0.8115   | 0.2470  | 0.377467 |
| <i>Tmcc1</i>         | chr6:116018617-116193486  | 3.6381   | 3.3040   | -0.1390 | 0.044723 |
| <i>Ncapd2</i>        | chr6:125168008-125191595  | 12.1396  | 13.2652  | 0.1279  | 0.432989 |
| <i>Asun</i>          | chr6:146549631-146577835  | 30.1269  | 27.5892  | -0.1269 | 0.159200 |
| <i>Zfp579</i>        | chr7:4983482-4996158      | 1.3280   | 1.5631   | 0.2351  | 0.283731 |
| <i>Igfbp3</i>        | chr7:19937304-19950743    | 1.4481   | 1.1213   | -0.3690 | 0.185480 |
| <i>Phldb3</i>        | chr7:24611327-24629288    | 3.4149   | 2.8308   | -0.2706 | 0.318135 |
| <i>NA</i>            | chr7:27988274-28014115    | 14.9140  | 13.3396  | -0.1610 | 0.227391 |
| <i>Fan1</i>          | chr7:64346757-64374095    | 3.7573   | 4.1168   | 0.1318  | 0.312886 |
| <i>Kctd21</i>        | chr7:97332326-97350213    | 1.1679   | 0.9362   | -0.3191 | 0.126138 |
| <i>2210018M11Rik</i> | chr7:98590614-98656569    | 17.3941  | 18.5190  | 0.0904  | 0.313894 |
| <i>Pgm2l1</i>        | chr7:100227393-100278868  | 7.9060   | 7.1500   | -0.1450 | 0.202354 |
| <i>Gm25683</i>       | chr7:118153479-118153610  | 7.4406   | 10.5757  | 0.5073  | 0.256358 |
| <i>Lcmt1</i>         | chr7:123377981-123430358  | 11.5955  | 9.8863   | -0.2301 | 0.298396 |
| <i>Tnfrsf26</i>      | chr7:143607684-143627845  | 41.8154  | 44.9136  | 0.1031  | 0.377596 |
| <i>Shcbp1</i>        | chr8:4735979-4779534      | 1.6411   | 2.0959   | 0.3529  | 0.402838 |
| <i>Cln8</i>          | chr8:14881334-14901720    | 1.4005   | 1.2028   | -0.2197 | 0.232642 |
| <i>Thap1</i>         | chr8:26158211-26162940    | 5.7177   | 6.4574   | 0.1755  | 0.182902 |
| <i>Mfhas1</i>        | chr8:35587797-35679449    | 9.0762   | 8.3384   | -0.1223 | 0.132276 |
| <i>Upf1</i>          | chr8:70331521-70353273    | 31.8228  | 28.4802  | -0.1601 | 0.299317 |
| <i>Tmem38a</i>       | chr8:72572102-72587282    | 1.3738   | 1.1021   | -0.3179 | 0.010893 |
| <i>Tom1</i>          | chr8:75033685-75070121    | 0.4540   | 0.6287   | 0.4697  | 0.272025 |
| <i>Lonp2</i>         | chr8:86624042-86723873    | 32.4998  | 33.8151  | 0.0572  | 0.123749 |
| <i>Papd5</i>         | chr8:88199212-88259722    | 23.0673  | 24.3243  | 0.0765  | 0.273933 |
| <i>Brd7</i>          | chr8:88331038-88362194    | 20.3408  | 21.4411  | 0.0760  | 0.227598 |
| <i>Amfr</i>          | chr8:93971587-94012663    | 40.9048  | 37.4676  | -0.1266 | 0.226035 |
| <i>Gm20388</i>       | chr8:119910840-124345722  | 39.6743  | 36.5543  | -0.1182 | 0.158220 |
| <i>Ubl5</i>          | chr9:20642877-20647140    | 26.4813  | 28.8711  | 0.1247  | 0.363330 |
| <i>Gm24067</i>       | chr9:20889483-20889568    | 16.7047  | 21.5670  | 0.3686  | 0.079031 |
| <i>Acad8</i>         | chr9:26974134-26999566    | 6.0870   | 5.4171   | -0.1682 | 0.178088 |
| <i>Pafah1b2</i>      | chr9:45965310-45984871    | 29.0142  | 30.3304  | 0.0640  | 0.105200 |

|                      |                          |          |          |         |          |
|----------------------|--------------------------|----------|----------|---------|----------|
| <i>Rexo2</i>         | chr9:48468513-48480611   | 58.6691  | 64.8609  | 0.1447  | 0.376954 |
| <i>Clk3</i>          | chr9:57750710-57765860   | 40.4887  | 43.1412  | 0.0915  | 0.328696 |
| <i>Ttk</i>           | chr9:83834688-83872390   | 0.7902   | 1.0757   | 0.4450  | 0.430541 |
| <i>Zbtb38</i>        | chr9:96682762-96752831   | 7.6662   | 8.0812   | 0.0761  | 0.270866 |
| <i>Wdr82</i>         | chr9:106170928-106191706 | 68.8898  | 64.1520  | -0.1028 | 0.054937 |
| <i>Amt</i>           | chr9:108296852-108301571 | 2.8072   | 2.3479   | -0.2578 | 0.036206 |
| <i>Impdh2</i>        | chr9:108560533-108565519 | 12.0956  | 10.6419  | -0.1847 | 0.173274 |
| <i>Tma7</i>          | chr9:109077987-109082381 | 26.1809  | 21.9129  | -0.2567 | 0.347706 |
| <i>Snrk</i>          | chr9:122117282-122169702 | 22.7978  | 21.2444  | -0.1018 | 0.065965 |
| <i>Cxcr6</i>         | chr9:123806476-123811754 | 68.0956  | 54.5681  | -0.3195 | 0.269544 |
| <i>Gpkow</i>         | chrX:7697130-7710262     | 10.2773  | 9.3643   | -0.1342 | 0.131215 |
| <i>Atp6ap2</i>       | chrX:12587800-12617049   | 24.7473  | 22.3112  | -0.1495 | 0.226119 |
| <i>Gpr34</i>         | chrX:13632088-13640858   | 6.5959   | 7.6024   | 0.2049  | 0.423584 |
| <i>Stk26</i>         | chrX:50841046-50893097   | 33.7851  | 35.8855  | 0.0870  | 0.311426 |
| <i>Dnase111</i>      | chrX:74273216-74282337   | 6.1295   | 5.2404   | -0.2261 | 0.275865 |
| <i>Dlg3</i>          | chrX:100767721-100818410 | 3.1163   | 2.7798   | -0.1649 | 0.108043 |
| <i>Ercc6l</i>        | chrX:102141715-102157091 | 1.9421   | 1.6841   | -0.2057 | 0.162615 |
| <i>Tsc22d3</i>       | chrX:140539527-140600659 | 93.9770  | 83.5392  | -0.1699 | 0.286183 |
| <i>Sepp1</i>         | chr15:3268546-3280508    | 62.1434  | 68.2808  | 0.1359  | 0.384809 |
| <i>Fam84b</i>        | chr15:60818995-60825080  | 5.4323   | 5.8508   | 0.1071  | 0.307938 |
| <i>Gm20717</i>       | chr15:64098316-64100886  | 1.1449   | 1.6552   | 0.5318  | 0.028513 |
| <i>1700088E04Rik</i> | chr15:79134654-79141251  | 7.8970   | 6.7032   | -0.2365 | 0.255967 |
| <i>Maff</i>          | chr15:79347540-79359072  | 1.2983   | 1.5825   | 0.2856  | 0.151043 |
| <i>Racgap1</i>       | chr15:99620495-99651656  | 18.9652  | 20.1548  | 0.0878  | 0.360554 |
| <i>Cog3</i>          | chr14:75702350-75754493  | 24.1218  | 25.4615  | 0.0780  | 0.297116 |
| <i>Agpat4</i>        | chr17:12118703-12219645  | 6.0503   | 5.3479   | -0.1780 | 0.178310 |
| <i>Zfp760</i>        | chr17:21707740-21725636  | 7.0592   | 6.3190   | -0.1598 | 0.181982 |
| <i>Bak1</i>          | chr17:27019809-27029009  | 19.4428  | 21.3648  | 0.1360  | 0.394900 |
| <i>Itpr3</i>         | chr17:27057303-27122223  | 31.2379  | 28.6493  | -0.1248 | 0.236280 |
| <i>Nfkbil1</i>       | chr17:35220174-35235792  | 7.5598   | 8.5090   | 0.1706  | 0.331419 |
| <i>Ndc80</i>         | chr17:71496099-71526857  | 6.5438   | 7.2469   | 0.1472  | 0.314434 |
| <i>Fbxo11</i>        | chr17:87990858-88065291  | 21.0611  | 22.7268  | 0.1098  | 0.396413 |
| <i>Prkdc</i>         | chr16:15637865-15842235  | 20.2702  | 18.3045  | -0.1472 | 0.276378 |
| <i>Cox17</i>         | chr16:38346990-38352763  | 10.3063  | 10.9468  | 0.0870  | 0.222847 |
| <i>Cblb</i>          | chr16:52031548-52208047  | 17.7178  | 19.4369  | 0.1336  | 0.456810 |
| <i>Nxpe3</i>         | chr16:55839952-55895279  | 3.0624   | 2.6993   | -0.1821 | 0.235342 |
| <i>Ccdc88b</i>       | chr19:6844622-6858211    | 43.7615  | 40.2025  | -0.1224 | 0.196156 |
| <i>Zfp91</i>         | chr19:12763659-12796126  | 17.4747  | 18.4175  | 0.0758  | 0.243864 |
| <i>2410127L17Rik</i> | chr19:18670779-18704788  | 1.9134   | 2.2612   | 0.2410  | 0.126196 |
| <i>Kif11</i>         | chr19:37376402-37421859  | 5.2820   | 6.9163   | 0.3889  | 0.349839 |
| <i>Exoc6</i>         | chr19:37550417-37683245  | 27.2936  | 28.6451  | 0.0697  | 0.198390 |
| <i>Hells</i>         | chr19:38930914-38971051  | 5.5339   | 5.9370   | 0.1014  | 0.299292 |
| <i>Chuk</i>          | chr19:44073334-44107480  | 25.8040  | 23.4046  | -0.1408 | 0.231805 |
| <i>Efhc1</i>         | chr1:20951625-20990838   | 0.4323   | 0.2851   | -0.6005 | 0.112751 |
| <i>Zap70</i>         | chr1:36761860-36782816   | 86.1262  | 79.2624  | -0.1198 | 0.160751 |
| <i>Cflar</i>         | chr1:58711507-58758884   | 24.9200  | 23.3118  | -0.0962 | 0.018488 |
| <i>Stk16</i>         | chr1:75210837-75215606   | 20.5774  | 19.0414  | -0.1119 | 0.064089 |
| <i>Tmem37</i>        | chr1:120067376-120074074 | 0.9794   | 1.4107   | 0.5264  | 0.269116 |
| <i>Zbtb41</i>        | chr1:139422382-139453005 | 8.3731   | 8.8679   | 0.0828  | 0.261152 |
| <i>Gas5</i>          | chr1:161034421-161038539 | 128.2318 | 137.6070 | 0.1018  | 0.363986 |
| <i>Mir5117</i>       | chr1:161037355-161037439 | 29.8743  | 36.7149  | 0.2975  | 0.200896 |
| <i>Parp1</i>         | chr1:180568954-180601253 | 45.3340  | 42.0834  | -0.1073 | 0.080101 |
| <i>Marc2</i>         | chr1:184813067-184846451 | 16.4827  | 15.2462  | -0.1125 | 0.059009 |
| <i>Zfp438</i>        | chr18:5210030-5334439    | 2.1018   | 2.4100   | 0.1974  | 0.212561 |
| <i>Ythdc2</i>        | chr18:44828664-44889720  | 11.0392  | 11.7719  | 0.0927  | 0.305219 |
| <i>Optn</i>          | chr2:5020641-5064051     | 0.2124   | 0.2984   | 0.4908  | 0.181444 |
| <i>Vim</i>           | chr2:13573926-13582826   | 179.3915 | 187.7133 | 0.0654  | 0.336837 |
| <i>Sapcd2</i>        | chr2:25372320-25378213   | 0.2950   | 0.4464   | 0.5975  | 0.355470 |
| <i>Gpsm1</i>         | chr2:26315514-26348237   | 4.1840   | 3.7099   | -0.1735 | 0.212319 |
| <i>Brd3</i>          | chr2:27445578-27507662   | 6.4343   | 5.8107   | -0.1471 | 0.217198 |
| <i>Rasgrp1</i>       | chr2:117279992-117343001 | 87.4531  | 91.3478  | 0.0629  | 0.300253 |
| <i>Serinc4</i>       | chr2:121439058-121456781 | 13.2541  | 12.1409  | -0.1266 | 0.088768 |
| <i>Ckap2l</i>        | chr2:129268209-129297212 | 1.5580   | 1.9377   | 0.3147  | 0.400577 |
| <i>Fastkd5</i>       | chr2:130613839-130630027 | 11.6431  | 10.4552  | -0.1553 | 0.184873 |
| <i>Pcna</i>          | chr2:132249161-132253314 | 34.7903  | 37.0250  | 0.0898  | 0.331281 |
| <i>Kif16b</i>        | chr2:142617473-142901531 | 10.1609  | 10.7163  | 0.0768  | 0.183496 |
| <i>Dstn</i>          | chr2:143915319-143943324 | 10.6310  | 11.4794  | 0.1108  | 0.189516 |
| <i>2500004C02Rik</i> | chr2:153341156-153346073 | 4.1512   | 3.5930   | -0.2083 | 0.108469 |
| <i>Gm14168</i>       | chr2:156571791-156577457 | 0.6318   | 0.8505   | 0.4288  | 0.197309 |
| <i>Ncoa3</i>         | chr2:165992635-166073242 | 24.2458  | 25.5495  | 0.0756  | 0.340219 |
| <i>Arfip1</i>        | chr3:84496092-85887516   | 16.8054  | 17.8815  | 0.0895  | 0.220800 |

|                      |                           |          |          |         |          |
|----------------------|---------------------------|----------|----------|---------|----------|
| <i>Isg20l2</i>       | chr3:87930313-87940686    | 34.3226  | 31.4130  | -0.1278 | 0.172269 |
| <i>Gba</i>           | chr3:89202927-89208681    | 36.2996  | 38.4971  | 0.0848  | 0.318140 |
| <i>S100a8</i>        | chr3:90669070-90670034    | 9.2687   | 16.6353  | 0.8438  | 0.349332 |
| <i>S100a10</i>       | chr3:93555079-93564643    | 192.6720 | 211.2852 | 0.1330  | 0.400893 |
| <i>Fam212b</i>       | chr3:105704598-105720842  | 2.2942   | 2.6044   | 0.1829  | 0.301019 |
| <i>Elovl6</i>        | chr3:129532385-129638495  | 8.4933   | 7.5704   | -0.1660 | 0.282714 |
| <i>Ctbs</i>          | chr3:146450469-146465849  | 5.2154   | 5.7364   | 0.1374  | 0.279657 |
| <i>Decr1</i>         | chr4:15917239-15945507    | 4.6326   | 5.0669   | 0.1293  | 0.273348 |
| <i>Dnajb5</i>        | chr4:42949813-42959425    | 1.9000   | 2.1080   | 0.1499  | 0.214899 |
| <i>Gm12454</i>       | chr4:43504427-43508747    | 0.8210   | 1.1153   | 0.4420  | 0.011885 |
| <i>Fam221b</i>       | chr4:43659621-43669145    | 0.9789   | 1.5005   | 0.6162  | 0.227992 |
| <i>Rpsa-ps11</i>     | chr4:59162267-59163156    | 13.9094  | 15.5022  | 0.1564  | 0.244980 |
| <i>1700018M17Rik</i> | chr4:59549153-59549625    | 24.9238  | 28.7604  | 0.2066  | 0.365160 |
| <i>E130308A19Rik</i> | chr4:59626210-59761439    | 0.6647   | 0.7447   | 0.1640  | 0.210959 |
| <i>Mtap</i>          | chr4:89137121-89181081    | 19.3138  | 20.3734  | 0.0771  | 0.118911 |
| <i>Cmpk1</i>         | chr4:114959335-114987241  | 18.5104  | 19.7209  | 0.0914  | 0.256640 |
| <i>Tnfrsf9</i>       | chr4:150914561-150946102  | 7.0381   | 8.1409   | 0.2100  | 0.432555 |
| <i>Pop4</i>          | chr7:38262819-38271348    | 26.0956  | 28.0164  | 0.1025  | 0.276217 |
| <i>Strap</i>         | chr6:137735077-137751932  | 34.4538  | 31.5115  | -0.1288 | 0.162902 |
| <i>Ppm1b</i>         | chr17:84956740-85023991   | 13.2703  | 12.1400  | -0.1284 | 0.159988 |
| <i>4833418N02Rik</i> | chr17:87274885-87282814   | 1.4650   | 1.7355   | 0.2445  | 0.264875 |
| <i>Spata5</i>        | chr3:37419895-37579096    | 20.4455  | 21.6323  | 0.0814  | 0.265427 |
| <i>Tomm40l</i>       | chr1:171217801-171222514  | 10.2384  | 9.1780   | -0.1577 | 0.196467 |
| <i>Capzb</i>         | chr4:139192898-139291818  | 56.6612  | 60.9379  | 0.1050  | 0.384007 |
| <i>Smu1</i>          | chr4:40736541-40757923    | 45.5511  | 48.6687  | 0.0955  | 0.328983 |
| <i>Pdcl3</i>         | chr1:38987813-38997236    | 18.5980  | 20.7257  | 0.1563  | 0.379596 |
| <i>Snrpd3</i>        | chr10:75518041-75535440   | 39.2026  | 43.1233  | 0.1375  | 0.316569 |
| <i>Lmtk2</i>         | chr5:144100435-144188204  | 10.6912  | 9.6803   | -0.1433 | 0.275689 |
| <i>Dennd6b</i>       | chr15:89182216-89196474   | 6.1669   | 5.5393   | -0.1549 | 0.171949 |
| <i>Cln7</i>          | chr17:25133390-25162104   | 10.1409  | 9.2455   | -0.1334 | 0.199132 |
| <i>D3Ertd751e</i>    | chr3:41742610-41759389    | 5.0165   | 5.4100   | 0.1090  | 0.200388 |
| <i>Mark3</i>         | chr12:111574509-111656227 | 41.3422  | 38.4316  | -0.1053 | 0.072632 |
| <i>Nudt21</i>        | chr8:94017769-94037021    | 5.7419   | 4.9233   | -0.2219 | 0.266409 |
| <i>Mcoln3</i>        | chr3:146117458-146141806  | 5.6336   | 4.9295   | -0.1926 | 0.225646 |
| <i>Lsm3</i>          | chr6:91515927-91522625    | 27.1934  | 30.0816  | 0.1456  | 0.398763 |
| <i>3000002C10Rik</i> | chr9:109827942-109832706  | 1.2765   | 1.0675   | -0.2580 | 0.099972 |
| <i>Reep2</i>         | chr18:34840588-34847463   | 4.1405   | 3.5402   | -0.2260 | 0.178637 |
| <i>Osbpl6</i>        | chr2:76406507-76600647    | 0.1144   | 0.0717   | -0.6740 | 0.274550 |
| <i>C1d</i>           | chr11:17257578-17269176   | 8.6202   | 9.3303   | 0.1142  | 0.325328 |
| <i>Qdpr</i>          | chr5:45434031-45450235    | 16.1927  | 14.6031  | -0.1491 | 0.121631 |
| <i>Nyap1</i>         | chr5:137730882-137741607  | 0.6341   | 0.5039   | -0.3314 | 0.074869 |
| <i>Tmie</i>          | chr9:110865710-110880113  | 12.1162  | 10.1827  | -0.2508 | 0.374535 |
| <i>Ccnj</i>          | chr19:40831278-40848572   | 4.4671   | 4.9126   | 0.1372  | 0.353337 |
| <i>Sbspon</i>        | chr1:15853861-15892722    | 0.6022   | 0.7694   | 0.3536  | 0.201720 |
| <i>Snx27</i>         | chr3:94497543-94582716    | 11.4065  | 10.3386  | -0.1418 | 0.243105 |
| <i>Gm12481</i>       | chr4:43663948-43664408    | 9.3522   | 14.3937  | 0.6221  | 0.227336 |
| <i>Mrps15</i>        | chr4:126046924-126055532  | 28.2755  | 30.5300  | 0.1107  | 0.362690 |
| <i>Dnajb9</i>        | chr12:44205896-44210068   | 7.5670   | 8.7120   | 0.2033  | 0.469730 |
| <i>Nr1d2</i>         | chr14:18204053-18239127   | 10.4356  | 11.2189  | 0.1044  | 0.301535 |
| <i>Gm15859</i>       | chr16:4729868-4730809     | 2.5921   | 3.2333   | 0.3189  | 0.091338 |
| <i>Kjf5b</i>         | chr18:6201001-6242174     | 49.9563  | 45.9603  | -0.1203 | 0.187701 |
| <i>Gm5422</i>        | chr10:31248139-31251045   | 0.4098   | 0.2610   | -0.6509 | 0.275379 |
| <i>E130307A14Rik</i> | chr10:39621411-39732007   | 4.9773   | 5.3882   | 0.1144  | 0.384863 |
| <i>Gm12057</i>       | chr11:22758593-22859544   | 2.2930   | 2.7796   | 0.2776  | 0.367775 |
| <i>Atp6v0a1</i>      | chr11:101009451-101063719 | 0.1297   | 0.1883   | 0.5377  | 0.280170 |
| <i>Taco1os</i>       | chr11:106065076-106066305 | 1.8868   | 1.3404   | -0.4932 | 0.108505 |
| <i>Csnk1d</i>        | chr11:120961748-120991330 | 29.2338  | 27.0991  | -0.1094 | 0.161601 |
| <i>Gm15996</i>       | chr12:111730093-111731831 | 1.3933   | 1.8661   | 0.4216  | 0.143020 |
| <i>Trmt44</i>        | chr5:35557205-35575070    | 5.3356   | 4.8231   | -0.1457 | 0.073835 |
| <i>Grpel1</i>        | chr5:36464997-36474080    | 19.8434  | 18.2657  | -0.1195 | 0.078601 |
| <i>Rmnd5a</i>        | chr6:71388633-71440637    | 42.0557  | 39.2040  | -0.1013 | 0.073911 |
| <i>Gm23751</i>       | chr6:125121723-125121859  | 7.3357   | 10.3059  | 0.4905  | 0.321940 |
| <i>Htatip2</i>       | chr7:49759105-49773999    | 9.3170   | 8.1408   | -0.1947 | 0.197044 |
| <i>Aagab</i>         | chr9:63602654-63641889    | 28.3200  | 25.7319  | -0.1383 | 0.192642 |
| <i>Haus7</i>         | chrX:73437314-73459044    | 11.1546  | 12.0991  | 0.1173  | 0.104780 |
| <i>Tab3</i>          | chrX:85574021-85634469    | 3.7518   | 4.0652   | 0.1158  | 0.332968 |
| <i>NA</i>            | chr15:78913918-78919517   | 11.1146  | 10.0415  | -0.1465 | 0.047870 |
| <i>4930570N19Rik</i> | chr14:26628406-26638183   | 6.7910   | 5.5689   | -0.2862 | 0.113833 |
| <i>1600002H07Rik</i> | chr17:24215053-24220851   | 3.9550   | 3.4098   | -0.2140 | 0.179669 |
| <i>Dis3l2</i>        | chr1:86703803-87050097    | 14.8340  | 15.7084  | 0.0826  | 0.241501 |
| <i>Nfatc1</i>        | chr18:80606204-80713071   | 10.0666  | 11.0621  | 0.1360  | 0.457036 |

|                      |                           |          |          |         |          |
|----------------------|---------------------------|----------|----------|---------|----------|
| <i>Atp5c1</i>        | chr2:10056015-10080510    | 106.1775 | 114.8956 | 0.1138  | 0.387597 |
| <i>Commd7</i>        | chr2:153616932-153632781  | 9.2914   | 9.8556   | 0.0850  | 0.246294 |
| <i>Gm14252</i>       | chr2:156332316-156339381  | 0.3822   | 0.2622   | -0.5434 | 0.226313 |
| <i>Ppid</i>          | chr3:79591341-79603650    | 29.1495  | 30.7566  | 0.0774  | 0.292524 |
| <i>Plekho1</i>       | chr3:95988428-95996001    | 22.1468  | 24.4746  | 0.1442  | 0.409884 |
| <i>Tdrd7</i>         | chr4:45965333-46034761    | 1.2014   | 1.4867   | 0.3074  | 0.428889 |
| <i>Ldlrap1</i>       | chr4:134744734-134768024  | 25.5325  | 23.4263  | -0.1242 | 0.197658 |
| <i>Slc25a10</i>      | chr11:120491839-120499187 | 2.4651   | 2.1300   | -0.2108 | 0.106328 |
| <i>Snrpg</i>         | chr6:86371582-86378902    | 56.8561  | 47.7156  | -0.2529 | 0.337334 |
| <i>Gm24616</i>       | chr16:23111616-23111755   | 94.6609  | 107.3791 | 0.1819  | 0.368638 |
| <i>Chchd10</i>       | chr10:75935572-75937725   | 7.0457   | 8.5149   | 0.2732  | 0.384451 |
| <i>Med31</i>         | chr11:72211723-72215592   | 5.2732   | 5.9047   | 0.1632  | 0.190947 |
| <i>Pctp</i>          | chr11:89982664-90002894   | 3.4477   | 2.9045   | -0.2473 | 0.289082 |
| <i>Tlk2</i>          | chr11:105178806-105283959 | 17.6466  | 18.5066  | 0.0686  | 0.184764 |
| <i>Prps113</i>       | chr12:57230411-57239882   | 47.1717  | 42.7344  | -0.1425 | 0.218345 |
| <i>Aldh6a1</i>       | chr12:84430722-84450950   | 9.1998   | 8.4027   | -0.1307 | 0.061448 |
| <i>Spin1</i>         | chr13:51100879-51152546   | 15.0228  | 13.9419  | -0.1077 | 0.021241 |
| <i>Emilin1</i>       | chr5:30913401-30921278    | 2.4285   | 2.6939   | 0.1497  | 0.314973 |
| <i>Naa25</i>         | chr5:121397935-121444378  | 14.5058  | 13.2961  | -0.1256 | 0.186843 |
| <i>Abtb1</i>         | chr6:88835914-88841935    | 24.1247  | 21.8533  | -0.1427 | 0.204758 |
| <i>Pex5</i>          | chr6:124396815-124415067  | 9.7834   | 8.9077   | -0.1353 | 0.135999 |
| <i>Pld3</i>          | chr7:27531999-27553218    | 45.7961  | 42.1523  | -0.1196 | 0.166998 |
| <i>Atp4a</i>         | chr7:30712208-30725535    | 0.2521   | 0.1615   | -0.6420 | 0.198668 |
| <i>Gm15470</i>       | chr7:41490350-41491721    | 2.0222   | 2.5439   | 0.3311  | 0.402132 |
| <i>Eftud1</i>        | chr7:82648613-82777852    | 10.7059  | 11.2724  | 0.0744  | 0.126137 |
| <i>Knop1</i>         | chr7:118842221-118856254  | 13.8181  | 12.7527  | -0.1158 | 0.093178 |
| <i>Zfp764</i>        | chr7:127403667-127406822  | 7.6982   | 8.3865   | 0.1236  | 0.248055 |
| <i>Psmc13</i>        | chr7:140881967-140898643  | 19.9813  | 18.2415  | -0.1314 | 0.164547 |
| <i>Cars</i>          | chr7:143557229-143600090  | 8.3195   | 8.9366   | 0.1032  | 0.279551 |
| <i>Gtf2e2</i>        | chr8:33731913-33777173    | 13.8687  | 12.5029  | -0.1496 | 0.108044 |
| <i>Psd3</i>          | chr8:67689081-68062286    | 0.3941   | 0.3338   | -0.2395 | 0.131938 |
| <i>Tmem221</i>       | chr8:71554302-71558871    | 7.1989   | 6.1658   | -0.2235 | 0.283240 |
| <i>Ranbp10</i>       | chr8:105768307-105827350  | 11.1046  | 12.2017  | 0.1359  | 0.433278 |
| <i>Zfp558</i>        | chr9:18455574-18478268    | 0.4831   | 0.3532   | -0.4518 | 0.205283 |
| <i>Sik3</i>          | chr9:46012819-46224194    | 5.3264   | 5.9079   | 0.1495  | 0.465696 |
| <i>Rab11a</i>        | chr9:64715298-64737758    | 16.5687  | 15.2117  | -0.1233 | 0.080277 |
| <i>Ppp2r3a</i>       | chr9:101104991-101251832  | 2.7227   | 2.4342   | -0.1616 | 0.172409 |
| <i>Naa10</i>         | chrX:73916872-73921944    | 17.5272  | 16.2113  | -0.1126 | 0.082363 |
| <i>Slc25a17</i>      | chr15:81318920-81360765   | 24.8055  | 22.2956  | -0.1539 | 0.218329 |
| <i>Mta3</i>          | chr17:83706162-83821516   | 23.8055  | 25.2513  | 0.0851  | 0.355678 |
| <i>Gm608</i>         | chr16:44173245-44227465   | 6.1855   | 6.7183   | 0.1192  | 0.457638 |
| <i>Slc35a5</i>       | chr16:45139572-45158706   | 6.4566   | 6.9935   | 0.1152  | 0.358108 |
| <i>Stard4</i>        | chr18:33199354-33213862   | 4.8910   | 4.3809   | -0.1589 | 0.204796 |
| <i>Kbtbd4</i>        | chr2:90904739-90911626    | 14.2355  | 12.9910  | -0.1320 | 0.107030 |
| <i>Phc3</i>          | chr3:30899294-30969415    | 12.0172  | 12.9948  | 0.1128  | 0.450408 |
| <i>Zfp639</i>        | chr3:32515294-32520685    | 38.4335  | 40.8364  | 0.0875  | 0.257588 |
| <i>Klf24</i>         | chr4:41390744-41464887    | 1.1616   | 1.0015   | -0.2139 | 0.188967 |
| <i>Gm12693</i>       | chr4:94935620-94936103    | 3.2329   | 4.2466   | 0.3935  | 0.278334 |
| <i>Jak1</i>          | chr4:101152366-101265282  | 189.4819 | 197.5549 | 0.0602  | 0.366780 |
| <i>Mettl4-ps1</i>    | chr17:71526895-71556543   | 0.2939   | 0.4447   | 0.5972  | 0.255468 |
| <i>Cops6</i>         | chr5:138161070-138164646  | 15.1952  | 13.9505  | -0.1233 | 0.035872 |
| <i>Hcfc2</i>         | chr10:82696159-82742428   | 10.0042  | 9.0480   | -0.1449 | 0.215861 |
| <i>Tnfsf11</i>       | chr14:78277444-78308043   | 0.9663   | 0.6856   | -0.4950 | 0.321743 |
| <i>Wdr59</i>         | chr8:111448783-111522107  | 6.2870   | 5.7229   | -0.1356 | 0.109422 |
| <i>Gm16166</i>       | chr10:120928185-120928972 | 1.3324   | 1.9374   | 0.5401  | 0.304308 |
| <i>Adcy1</i>         | chr11:7063488-7178506     | 0.2138   | 0.1680   | -0.3473 | 0.127457 |
| <i>Alkbh1</i>        | chr12:87425839-87443839   | 20.3860  | 18.8356  | -0.1141 | 0.151444 |
| <i>Adck5</i>         | chr15:76576357-76595816   | 6.2813   | 5.6599   | -0.1503 | 0.119466 |
| <i>4930402H24Rik</i> | chr2:130706199-130906406  | 2.9076   | 2.6318   | -0.1438 | 0.180208 |
| <i>Fdx1</i>          | chr9:51943306-51963533    | 10.6903  | 9.3151   | -0.1987 | 0.062056 |
| <i>Klhl20</i>        | chr1:161088374-161131511  | 7.8049   | 8.3135   | 0.0911  | 0.366768 |
| <i>Rpsa-ps9</i>      | chr2:28477165-28478050    | 3.9673   | 3.2431   | -0.2908 | 0.053432 |
| <i>Mcu</i>           | chr10:59446983-59616692   | 2.1004   | 2.3173   | 0.1418  | 0.340395 |
| <i>Slc17a9</i>       | chr2:180725262-180742280  | 19.6108  | 20.9778  | 0.0972  | 0.352755 |
| <i>Mmp17</i>         | chr5:129584168-129608875  | 0.3142   | 0.2236   | -0.4906 | 0.145259 |
| <i>mt-Tp</i>         | chrM:15355-15422          | 13.1257  | 19.9226  | 0.6020  | 0.403604 |
| <i>Slc35e1</i>       | chr8:72480640-72492614    | 24.3788  | 22.4565  | -0.1185 | 0.175888 |
| <i>Gm10097</i>       | chr10:5069191-5071975     | 0.9926   | 0.7896   | -0.3301 | 0.109202 |
| <i>4933424L21Rik</i> | chr11:57623697-57649494   | 1.4709   | 1.0878   | -0.4352 | 0.210190 |
| <i>Sp6</i>           | chr11:97013393-97024734   | 0.8239   | 0.6527   | -0.3361 | 0.176314 |
| <i>Esyt2</i>         | chr12:116281221-116373096 | 102.1272 | 92.7419  | -0.1391 | 0.289852 |

|                      |                           |           |           |         |          |
|----------------------|---------------------------|-----------|-----------|---------|----------|
| <i>Plk-ps1</i>       | chr5:35554183-35555971    | 2.7630    | 2.2741    | -0.2809 | 0.214483 |
| <i>Chic2</i>         | chr5:75001025-75044774    | 8.2037    | 8.7646    | 0.0954  | 0.282621 |
| <i>Coq2</i>          | chr5:100654722-100675140  | 14.0370   | 12.8849   | -0.1236 | 0.050201 |
| <i>Ankle2</i>        | chr5:110231003-110256651  | 28.9381   | 26.6804   | -0.1172 | 0.179329 |
| <i>Foxp1</i>         | chr6:98925337-99522721    | 30.6652   | 32.4148   | 0.0801  | 0.398156 |
| <i>Zfp787</i>        | chr7:6131488-6155971      | 7.0455    | 6.1711    | -0.1912 | 0.182463 |
| <i>Lig1</i>          | chr7:13277282-13311433    | 4.4391    | 4.8803    | 0.1367  | 0.393293 |
| <i>Sipa1l3</i>       | chr7:29320371-29518641    | 1.0929    | 1.2340    | 0.1752  | 0.430908 |
| <i>Z610021A01Rik</i> | chr7:41599260-41628533    | 13.1305   | 13.8421   | 0.0761  | 0.174569 |
| <i>Bax</i>           | chr7:45461694-45466898    | 52.3162   | 47.6058   | -0.1361 | 0.138325 |
| <i>Gm10655</i>       | chr9:61370796-61372193    | 0.9288    | 1.2774    | 0.4597  | 0.334175 |
| <i>Gm8116</i>        | chr9:78820422-78821892    | 0.5407    | 0.7596    | 0.4903  | 0.198567 |
| <i>Rbm10</i>         | chrX:20617502-20650901    | 15.1331   | 16.1902   | 0.0974  | 0.303466 |
| <i>Fam122b</i>       | chrX:53243414-53269805    | 2.1774    | 2.4595    | 0.1758  | 0.349724 |
| <i>Map3k15</i>       | chrX:159988432-160123351  | 11.2450   | 12.0008   | 0.0939  | 0.290554 |
| <i>Fam186b</i>       | chr15:99271017-99287180   | 0.6631    | 0.8180    | 0.3028  | 0.185522 |
| <i>Slc4a7</i>        | chr14:14703024-14799943   | 7.4560    | 8.1586    | 0.1299  | 0.462962 |
| <i>Zfp871</i>        | chr17:32771235-32788287   | 23.1761   | 25.8859   | 0.1595  | 0.526389 |
| <i>Mapk1</i>         | chr16:16983381-17047453   | 36.8908   | 34.0210   | -0.1168 | 0.180030 |
| <i>Gm20518</i>       | chr16:17835276-17891671   | 15.9229   | 14.4192   | -0.1431 | 0.261248 |
| <i>Sp110</i>         | chr1:85576898-85598817    | 26.4972   | 27.4914   | 0.0531  | 0.200358 |
| <i>Cntn2</i>         | chr1:132509424-132542940  | 0.1405    | 0.0998    | -0.4937 | 0.133053 |
| <i>Phax</i>          | chr18:56562442-56587712   | 22.8487   | 24.7047   | 0.1127  | 0.353768 |
| <i>Gata3</i>         | chr2:9857077-9890034      | 4.4095    | 5.0556    | 0.1973  | 0.429258 |
| <i>BC005624</i>      | chr2:30972832-30982201    | 16.0565   | 17.4186   | 0.1175  | 0.367177 |
| <i>Wdr38</i>         | chr2:38997475-39006168    | 2.9774    | 2.5695    | -0.2126 | 0.137193 |
| <i>Celf1</i>         | chr2:90940381-91019497    | 27.0612   | 24.9479   | -0.1173 | 0.202408 |
| <i>Lin7c</i>         | chr2:109890852-109901003  | 31.5325   | 33.8375   | 0.1018  | 0.368391 |
| <i>Zfp770</i>        | chr2:114193460-114201469  | 4.3490    | 4.6862    | 0.1077  | 0.246143 |
| <i>Ehd4</i>          | chr2:120089174-120154606  | 2.1123    | 2.4473    | 0.2123  | 0.391691 |
| <i>Lmna</i>          | chr3:88481147-88509956    | 1.2230    | 1.4293    | 0.2248  | 0.242661 |
| <i>Gm12404</i>       | chr4:41520693-41525823    | 0.4534    | 0.6420    | 0.5017  | 0.225400 |
| <i>Hook1</i>         | chr4:95967239-96025413    | 7.6295    | 8.0630    | 0.0797  | 0.225125 |
| <i>Hic1</i>          | chr11:75164564-75169519   | 0.4488    | 0.5762    | 0.3605  | 0.264348 |
| <i>Srek1ip1</i>      | chr13:104792483-104839274 | 5.8804    | 6.4827    | 0.1407  | 0.323628 |
| <i>Gm1070</i>        | chr6:71293764-71302718    | 0.2316    | 0.3320    | 0.5194  | 0.094091 |
| <i>Aldh16a1</i>      | chr7:45140683-45154584    | 5.6376    | 5.1335    | -0.1351 | 0.124878 |
| <i>Lrrc27</i>        | chr7:139212987-139242979  | 0.7644    | 0.5858    | -0.3839 | 0.251114 |
| <i>NA</i>            | chr8:71674956-71676674    | 1.0426    | 1.3435    | 0.3657  | 0.287841 |
| <i>Eef1a1</i>        | chr9:78478448-78489151    | 1973.2745 | 2121.7495 | 0.1047  | 0.392185 |
| <i>Usp4</i>          | chr9:108347830-108392529  | 42.6114   | 40.0345   | -0.0900 | 0.012693 |
| <i>Uhrf1bp1</i>      | chr17:27856489-27900040   | 0.8119    | 0.6886    | -0.2377 | 0.196289 |
| <i>Gtf2a1</i>        | chr12:91555915-91590487   | 8.6456    | 9.0889    | 0.0721  | 0.169814 |
| <i>Dguok</i>         | chr6:83480216-83506969    | 19.9364   | 20.9431   | 0.0711  | 0.011162 |
| <i>Gm26737</i>       | chr9:44112922-44121947    | 0.4126    | 0.2675    | -0.6254 | 0.203515 |
| <i>Ccdc12</i>        | chr9:110656502-110711590  | 30.1100   | 26.4765   | -0.1855 | 0.267069 |
| <i>Dnase1</i>        | chr16:4036941-4040024     | 6.9322    | 6.0142    | -0.2049 | 0.308254 |
| <i>Trpc4ap</i>       | chr2:155634270-155692384  | 27.9960   | 26.2160   | -0.0948 | 0.071328 |
| <i>Klf2c</i>         | chr4:117159638-117182639  | 0.9215    | 1.1381    | 0.3045  | 0.403419 |
| <i>Stamos</i>        | chr2:14070331-14073934    | 0.7942    | 1.1462    | 0.5292  | 0.104158 |
| <i>Mob3c</i>         | chr4:115828091-115836185  | 15.4759   | 14.1980   | -0.1243 | 0.110836 |
| <i>Ndnf</i>          | chr6:65671589-65706930    | 0.3090    | 0.4172    | 0.4331  | 0.386723 |
| <i>Psmc2</i>         | chr5:21785282-21803787    | 13.6108   | 12.5189   | -0.1206 | 0.117770 |
| <i>Dpp3</i>          | chr19:4907228-4928287     | 29.9419   | 27.8018   | -0.1070 | 0.084147 |
| <i>Ube2w</i>         | chr1:16540789-16619489    | 6.0212    | 6.4256    | 0.0938  | 0.209104 |
| <i>Cryz</i>          | chr3:154597196-154623182  | 0.8792    | 1.1035    | 0.3278  | 0.245878 |
| <i>Gm22485</i>       | chr14:27489268-27489377   | 6.0607    | 8.9359    | 0.5601  | 0.208667 |
| <i>9530082P21Rik</i> | chr17:23743233-23754065   | 2.5380    | 2.2370    | -0.1821 | 0.140993 |
| <i>Arpc5</i>         | chr1:152766541-152775597  | 154.0713  | 164.5349  | 0.0948  | 0.351181 |
| <i>Zscan30</i>       | chr18:23970974-23981555   | 2.8016    | 2.0062    | -0.4818 | 0.344343 |
| <i>Actl6a</i>        | chr3:32708545-32726968    | 29.8140   | 27.2869   | -0.1278 | 0.155608 |
| <i>Anapc16</i>       | chr10:59987408-60003135   | 17.5690   | 16.1147   | -0.1247 | 0.155306 |
| <i>Lcorl</i>         | chr5:45697180-45857615    | 3.7350    | 4.0235    | 0.1073  | 0.321481 |
| <i>1110065P20Rik</i> | chr4:124849484-124850730  | 4.9546    | 4.1759    | -0.2467 | 0.023340 |
| <i>Snord42b</i>      | chr11:78183055-78183124   | 22.4492   | 28.7616   | 0.3575  | 0.161902 |
| <i>Alyref</i>        | chr11:120592120-120598365 | 20.3554   | 21.8443   | 0.1018  | 0.378791 |
| <i>Mir150</i>        | chr7:45121756-45121821    | 18.5442   | 12.2087   | -0.6031 | 0.326016 |
| <i>Mesdc1</i>        | chr7:83880494-83884341    | 4.7092    | 4.1830    | -0.1709 | 0.209775 |
| <i>2010204K13Rik</i> | chrX:7411816-7445143      | 1.0821    | 0.7988    | -0.4379 | 0.182120 |
| <i>Ttc7</i>          | chr17:87282885-87381769   | 26.1444   | 23.8978   | -0.1296 | 0.262083 |
| <i>Pmepa1</i>        | chr2:173224457-173276533  | 3.0727    | 3.3646    | 0.1309  | 0.292705 |

|                      |                           |          |          |         |          |
|----------------------|---------------------------|----------|----------|---------|----------|
| <i>Ccrn4l</i>        | chr3:51224446-51251644    | 2.5921   | 2.2900   | -0.1788 | 0.300982 |
| <i>Gale</i>          | chr4:135963726-135968178  | 3.7828   | 3.2263   | -0.2296 | 0.252122 |
| <i>Arl10</i>         | chr13:54575014-54581128   | 3.1386   | 2.6639   | -0.2366 | 0.042224 |
| <i>Herc4</i>         | chr10:63243796-63317881   | 47.1770  | 43.6719  | -0.1114 | 0.161543 |
| <i>Arid3a</i>        | chr10:79927042-79955018   | 2.4469   | 2.1165   | -0.2093 | 0.250477 |
| <i>BC048403</i>      | chr10:121739936-121752878 | 2.1327   | 2.4959   | 0.2269  | 0.357635 |
| <i>Gm20563</i>       | chr13:62006665-62006941   | 2.1861   | 3.1723   | 0.5371  | 0.126489 |
| <i>Stx18</i>         | chr5:38038741-38137765    | 6.4066   | 6.7991   | 0.0858  | 0.058131 |
| <i>Lfng</i>          | chr5:140607340-140615543  | 202.3601 | 183.9342 | -0.1377 | 0.282101 |
| <i>Trbv15</i>        | chr6:41141210-41141658    | 107.9092 | 115.9767 | 0.1040  | 0.305470 |
| <i>Rybp</i>          | chr6:100228565-100287441  | 3.4746   | 3.8081   | 0.1322  | 0.293340 |
| <i>Ppp6r1</i>        | chr7:4631500-4658950      | 109.4188 | 101.5786 | -0.1073 | 0.143154 |
| <i>Prmt3</i>         | chr7:49778345-49858265    | 31.2859  | 28.7264  | -0.1231 | 0.159424 |
| <i>Oxsr1</i>         | chr9:119238431-119322427  | 18.4069  | 19.3031  | 0.0686  | 0.223807 |
| <i>P2ry10</i>        | chrX:107088491-107104974  | 70.9431  | 75.6820  | 0.0933  | 0.380083 |
| <i>Gm22392</i>       | chr15:44432594-44432701   | 9.1341   | 6.1704   | -0.5659 | 0.161173 |
| <i>Rrp36</i>         | chr17:46667457-46674255   | 25.3865  | 23.0479  | -0.1394 | 0.130335 |
| <i>Gm9320</i>        | chr17:70853766-70875965   | 2.0891   | 1.3654   | -0.6135 | 0.226674 |
| <i>Il10rb</i>        | chr16:91406163-91425834   | 25.1617  | 26.4186  | 0.0703  | 0.320439 |
| <i>Trak2</i>         | chr1:58900448-58973430    | 20.5667  | 19.2262  | -0.0972 | 0.087035 |
| <i>Abcb6</i>         | chr1:75171716-75180392    | 2.3774   | 2.6583   | 0.1611  | 0.395015 |
| <i>Sap130</i>        | chr18:31634370-31723061   | 8.8870   | 9.7273   | 0.1303  | 0.416202 |
| <i>Pced1a</i>        | chr2:130417246-130424701  | 8.5179   | 9.0020   | 0.0798  | 0.237189 |
| <i>Zfp937</i>        | chr2:150218072-150240725  | 0.7278   | 0.9289   | 0.3519  | 0.288779 |
| <i>Trib3</i>         | chr2:152337421-152344032  | 0.5392   | 0.6977   | 0.3719  | 0.005800 |
| <i>Pdpf</i>          | chr2:181187246-181188771  | 16.5954  | 14.6148  | -0.1834 | 0.260838 |
| <i>Mccc1</i>         | chr3:35959311-36000678    | 1.5536   | 1.7014   | 0.1311  | 0.341316 |
| <i>Syt11</i>         | chr3:88744699-88775164    | 10.9133  | 9.9229   | -0.1373 | 0.251127 |
| <i>Cd2</i>           | chr3:101275898-101287939  | 261.1891 | 274.1901 | 0.0701  | 0.323801 |
| <i>Runx3</i>         | chr4:135120651-135177990  | 8.6643   | 9.5931   | 0.1469  | 0.464380 |
| <i>Mpeg1</i>         | chr19:12460778-12465284   | 0.4047   | 0.5726   | 0.5007  | 0.427267 |
| <i>3300002A11Rik</i> | chr12:99341153-99361827   | 1.3363   | 0.9084   | -0.5568 | 0.136937 |
| <i>Uimc1</i>         | chr13:55027879-55100300   | 21.1456  | 22.1267  | 0.0654  | 0.273642 |
| <i>Carkd</i>         | chr8:11497505-11514960    | 12.9993  | 12.0276  | -0.1121 | 0.053460 |
| <i>NA</i>            | chr8:85432685-85433315    | 1.8772   | 1.3279   | -0.4994 | 0.101246 |
| <i>RbmX</i>          | chrX:57383529-57393036    | 41.3812  | 38.0370  | -0.1216 | 0.209657 |
| <i>Gm10250</i>       | chr15:5120601-5121172     | 9.2014   | 7.7182   | -0.2536 | 0.169090 |
| <i>Cnih1</i>         | chr14:46775581-46788411   | 21.3524  | 22.6565  | 0.0855  | 0.170173 |
| <i>Guca1b</i>        | chr17:47385392-47392967   | 1.3280   | 1.0729   | -0.3077 | 0.146940 |
| <i>Rbm8a</i>         | chr3:96629927-96633779    | 12.9489  | 14.1050  | 0.1234  | 0.369265 |
| <i>Pnma1</i>         | chr12:84146130-84148489   | 0.8413   | 0.6319   | -0.4130 | 0.255747 |
| <i>Nek9</i>          | chr12:85299513-85339362   | 25.7696  | 24.0533  | -0.0994 | 0.100584 |
| <i>Hist1h2bj</i>     | chr13:22043213-22043676   | 12.9897  | 15.2719  | 0.2335  | 0.421270 |
| <i>Cit</i>           | chr5:115845277-116008947  | 0.3407   | 0.4421   | 0.3757  | 0.504305 |
| <i>Retsat</i>        | chr6:72598474-72608425    | 2.9768   | 3.2965   | 0.1472  | 0.249654 |
| <i>Stard10</i>       | chr7:101317085-101346626  | 1.4991   | 1.7943   | 0.2593  | 0.298089 |
| <i>Mrps31</i>        | chr8:22411339-22429665    | 14.4661  | 15.6239  | 0.1111  | 0.269998 |
| <i>Smad1</i>         | chr8:79338394-79399518    | 5.4375   | 5.8818   | 0.1133  | 0.338256 |
| <i>Zfp809</i>        | chr9:22225713-22243197    | 22.3725  | 20.3330  | -0.1379 | 0.102860 |
| <i>BC004004</i>      | chr17:29268787-29302881   | 6.5600   | 6.9544   | 0.0842  | 0.259474 |
| <i>Myl12b</i>        | chr17:70973919-70990787   | 154.7726 | 168.6287 | 0.1237  | 0.420200 |
| <i>Usp16</i>         | chr16:87454702-87483517   | 12.9856  | 12.0218  | -0.1113 | 0.111902 |
| <i>Scyl3</i>         | chr1:163929099-163955126  | 14.1417  | 13.1043  | -0.1099 | 0.127498 |
| <i>Gm26538</i>       | chr18:34796894-34803484   | 2.8349   | 3.1609   | 0.1570  | 0.317707 |
| <i>Fech</i>          | chr18:64456549-64489066   | 7.5832   | 8.2246   | 0.1171  | 0.251054 |
| <i>Snx21</i>         | chr2:164785822-164793816  | 3.4004   | 3.0287   | -0.1670 | 0.174084 |
| <i>Cd96</i>          | chr16:46035656-46120251   | 145.7227 | 151.7627 | 0.0586  | 0.273367 |
| <i>Serpini1</i>      | chr3:75557546-75643495    | 6.4196   | 5.7624   | -0.1558 | 0.252697 |
| <i>Kmo</i>           | chr1:175620380-175662116  | 0.2173   | 0.2864   | 0.3986  | 0.084638 |
| <i>Tpgs1</i>         | chr10:79669409-79676126   | 13.1831  | 14.9234  | 0.1789  | 0.422354 |
| <i>2610024D14Rik</i> | chr11:21099533-21099827   | 22.3311  | 17.9569  | -0.3145 | 0.344574 |
| <i>Itpk1</i>         | chr12:102568581-102704929 | 12.6822  | 13.4833  | 0.0884  | 0.293819 |
| <i>Cenpp</i>         | chr13:49464026-49652746   | 2.1986   | 2.6487   | 0.2687  | 0.168416 |
| <i>Txndc15</i>       | chr13:55714649-55726221   | 30.9098  | 27.8188  | -0.1520 | 0.245713 |
| <i>Usp30</i>         | chr5:114100332-114123506  | 9.2509   | 9.8230   | 0.0866  | 0.153481 |
| <i>Gpr133</i>        | chr5:129096749-129204599  | 0.3541   | 0.4254   | 0.2646  | 0.281594 |
| <i>1110019D14Rik</i> | chr6:13871525-14044373    | 1.1464   | 1.4554   | 0.3442  | 0.299079 |
| <i>Dfna5</i>         | chr6:50189368-50263862    | 0.7697   | 0.8918   | 0.2125  | 0.370454 |
| <i>Aak1</i>          | chr6:86849516-86991864    | 7.3376   | 7.9912   | 0.1231  | 0.448864 |
| <i>Stk38l</i>        | chr6:146724994-146778812  | 3.6964   | 3.3226   | -0.1538 | 0.079871 |
| <i>Ndn12</i>         | chr7:64867051-64872997    | 4.9589   | 4.4496   | -0.1563 | 0.194142 |



|                      |                           |          |          |         |          |
|----------------------|---------------------------|----------|----------|---------|----------|
| <i>Gm17137</i>       | chr7:126164032-126168403  | 2.3168   | 1.9659   | -0.2370 | 0.319713 |
| <i>Gm16982</i>       | chr7:141610065-141613747  | 3.9440   | 3.4225   | -0.2046 | 0.213869 |
| <i>Slc25a42</i>      | chr8:70184339-70212305    | 0.9470   | 1.0892   | 0.2018  | 0.332205 |
| <i>Gm15775</i>       | chr8:124324777-124331795  | 4.8589   | 6.1919   | 0.3498  | 0.442512 |
| <i>Sfmbt1</i>        | chr14:30714848-30822713   | 1.6324   | 1.7880   | 0.1314  | 0.235765 |
| <i>Trav12-2</i>      | chr14:53616314-53616912   | 13.8332  | 11.3536  | -0.2850 | 0.265672 |
| <i>Wdr4</i>          | chr17:31494322-31519974   | 7.1989   | 6.6247   | -0.1199 | 0.073189 |
| <i>Gm15879</i>       | chr16:4032838-4037847     | 5.6601   | 4.5945   | -0.3009 | 0.327207 |
| <i>Dgcr6</i>         | chr16:18052859-18071632   | 1.0272   | 0.8275   | -0.3119 | 0.117590 |
| <i>Jak2</i>          | chr19:29251827-29313080   | 53.0432  | 55.0435  | 0.0534  | 0.223541 |
| <i>Gorasp2</i>       | chr2:70661575-70712636    | 19.3465  | 20.7322  | 0.0998  | 0.382680 |
| <i>Bnipl</i>         | chr3:95241270-95251193    | 0.3846   | 0.5402   | 0.4904  | 0.250164 |
| <i>Toe1</i>          | chr4:116794309-116807640  | 16.0388  | 14.4645  | -0.1491 | 0.257515 |
| <i>Dcdc2b</i>        | chr4:129608330-129614257  | 9.5879   | 8.3911   | -0.1924 | 0.218555 |
| <i>Rpap2</i>         | chr5:107597372-107661838  | 11.6424  | 12.2762  | 0.0765  | 0.236572 |
| <i>Unc93b1</i>       | chr19:3935185-3949340     | 3.4283   | 3.9019   | 0.1867  | 0.400986 |
| <i>Zfp397</i>        | chr18:23954687-23964671   | 38.1963  | 34.2794  | -0.1561 | 0.341122 |
| <i>Gm9888</i>        | chr9:114780099-114782257  | 5.8647   | 6.8723   | 0.2287  | 0.339959 |
| <i>Ticam1</i>        | chr17:56269318-56276786   | 3.1741   | 3.5496   | 0.1613  | 0.288726 |
| <i>Cpne3</i>         | chr4:19519253-19570108    | 11.0482  | 11.9092  | 0.1083  | 0.409420 |
| <i>Orc4</i>          | chr2:48902823-48950277    | 12.0717  | 12.8919  | 0.0948  | 0.364326 |
| <i>Ptpn6</i>         | chr6:124720706-124738714  | 125.0285 | 134.3777 | 0.1040  | 0.421466 |
| <i>Uchl4</i>         | chr9:64235200-64236362    | 2.7811   | 3.3173   | 0.2544  | 0.222486 |
| <i>Ccb1</i>          | chr2:30185123-30205847    | 5.7620   | 5.0777   | -0.1824 | 0.203134 |
| <i>Smarcc2</i>       | chr10:128459235-128490173 | 24.3782  | 26.1203  | 0.0996  | 0.433784 |
| <i>Rita1</i>         | chr5:120594304-120612589  | 1.5180   | 1.2605   | -0.2682 | 0.163729 |
| <i>9330179D12Rik</i> | chr6:127149388-127212411  | 1.8369   | 2.2241   | 0.2759  | 0.295683 |
| <i>Plcx2</i>         | chr16:45959262-46010218   | 24.8583  | 26.1197  | 0.0714  | 0.359759 |
| <i>Mrps2</i>         | chr2:28468065-28471178    | 11.4174  | 12.1128  | 0.0853  | 0.188240 |
| <i>Fubp1</i>         | chr3:152210457-152236830  | 89.2115  | 82.9395  | -0.1052 | 0.146342 |
| <i>Snx30</i>         | chr4:59805839-59904737    | 4.8096   | 5.1894   | 0.1097  | 0.347667 |
| <i>Gm13789</i>       | chr5:114363414-114365357  | 23.0735  | 20.6575  | -0.1596 | 0.095206 |
| <i>Slc25a22</i>      | chr7:141429738-141437892  | 6.9983   | 6.3271   | -0.1455 | 0.208238 |
| <i>Gm5915</i>        | chr8:105660333-105660787  | 2.4079   | 3.3617   | 0.4814  | 0.365542 |
| <i>Slc35g2</i>       | chr9:100552192-100571085  | 2.3707   | 1.9516   | -0.2807 | 0.116399 |
| <i>Gemin6</i>        | chr17:80224440-80228497   | 5.5218   | 4.3990   | -0.3280 | 0.406499 |
| <i>Gm15133</i>       | chr7:104315018-104324838  | 6.9248   | 5.6507   | -0.2933 | 0.364871 |
| <i>Fam65b</i>        | chr13:24582188-24733816   | 78.6364  | 74.0090  | -0.0875 | 0.065056 |
| <i>Edc4</i>          | chr8:105880880-105894908  | 19.8706  | 18.3637  | -0.1138 | 0.190562 |
| <i>Lpxn</i>          | chr19:12798605-12833807   | 58.5477  | 53.5311  | -0.1292 | 0.223138 |
| <i>Syde1</i>         | chr10:78584502-78591964   | 3.2357   | 2.7785   | -0.2198 | 0.250652 |
| <i>Plxnc1</i>        | chr10:94790865-94944578   | 5.8265   | 6.3334   | 0.1203  | 0.450801 |
| <i>Lyrn9</i>         | chr11:78826583-78846870   | 5.2907   | 4.8238   | -0.1333 | 0.199254 |
| <i>Cacnb1</i>        | chr11:98001507-98023034   | 2.2263   | 1.9048   | -0.2249 | 0.330084 |
| <i>Dnmt3a</i>        | chr12:3806006-3914443     | 7.0217   | 6.5775   | -0.0943 | 0.015539 |
| <i>Daam1</i>         | chr12:71831077-71992367   | 2.3269   | 2.5532   | 0.1339  | 0.286254 |
| <i>Slc38a6</i>       | chr12:73286778-73354049   | 1.0517   | 0.9139   | -0.2026 | 0.102492 |
| <i>Polr3g</i>        | chr13:81673842-81711013   | 7.4249   | 8.0093   | 0.1093  | 0.288671 |
| <i>Gm9828</i>        | chr13:98316421-98324415   | 11.1383  | 12.7616  | 0.1963  | 0.449635 |
| <i>Tbc1d14</i>       | chr5:36490603-36593276    | 4.3934   | 4.7351   | 0.1081  | 0.405283 |
| <i>Ociad2</i>        | chr5:73322198-73338947    | 0.2901   | 0.4092   | 0.4961  | 0.151154 |
| <i>Adam1a</i>        | chr5:121518575-121521695  | 2.2914   | 1.9648   | -0.2219 | 0.156442 |
| <i>Cdk2ap1</i>       | chr5:124345416-124354671  | 1.4644   | 1.1618   | -0.3340 | 0.189058 |
| <i>Gm16599</i>       | chr5:136274995-136417894  | 2.0430   | 1.6286   | -0.3270 | 0.067522 |
| <i>Ufsp1</i>         | chr5:137294668-137295664  | 1.9410   | 2.4692   | 0.3473  | 0.298722 |
| <i>Malsu1</i>        | chr6:49073794-49086751    | 7.2357   | 7.8441   | 0.1165  | 0.306547 |
| <i>Zfp239</i>        | chr6:117862099-117873291  | 1.9705   | 2.2428   | 0.1868  | 0.324401 |
| <i>Klrd1</i>         | chr6:129591781-129598775  | 178.3886 | 161.8328 | -0.1405 | 0.280728 |
| <i>Zscan22</i>       | chr7:12897814-12909083    | 2.8890   | 3.2691   | 0.1783  | 0.358178 |
| <i>Ccdc114</i>       | chr7:45924071-45948956    | 0.3537   | 0.2666   | -0.4075 | 0.220709 |
| <i>Zfp553</i>        | chr7:127233060-127238179  | 14.3485  | 13.0528  | -0.1365 | 0.217311 |
| <i>AA386476</i>      | chr8:47675390-47677055    | 4.1855   | 3.6064   | -0.2148 | 0.086287 |
| <i>Uba52</i>         | chr8:70508262-70510801    | 5.8021   | 5.0240   | -0.2077 | 0.171353 |
| <i>Cul5</i>          | chr9:53614581-53670014    | 15.4221  | 14.2902  | -0.1100 | 0.127122 |
| <i>Pfkfb4</i>        | chr9:108991901-109032223  | 1.5935   | 1.3594   | -0.2292 | 0.144423 |
| <i>Ccr4</i>          | chr9:114490315-114496544  | 0.6911   | 0.5159   | -0.4216 | 0.214258 |
| <i>Foxp3</i>         | chrX:7579675-7595243      | 4.1199   | 3.6066   | -0.1920 | 0.273514 |
| <i>Ube2a</i>         | chrX:36874357-36884215    | 16.0216  | 14.4989  | -0.1441 | 0.154155 |
| <i>Klhl4</i>         | chrX:114474332-114560829  | 0.5782   | 0.7688   | 0.4110  | 0.341957 |
| <i>Glt8d1</i>        | chr14:31001392-31012441   | 5.1673   | 4.5284   | -0.1904 | 0.198022 |
| <i>Kctd4</i>         | chr14:75955002-75965217   | 1.7871   | 2.1105   | 0.2400  | 0.440141 |

|                      |                           |          |          |         |          |
|----------------------|---------------------------|----------|----------|---------|----------|
| <i>Rap2a</i>         | chr14:120478460-120507194 | 2.6350   | 2.2654   | -0.2181 | 0.292059 |
| <i>Hn1l</i>          | chr17:24942155-24960636   | 7.3108   | 7.9163   | 0.1148  | 0.319028 |
| <i>D17H6553E</i>     | chr17:35126372-35128855   | 18.8395  | 17.2689  | -0.1256 | 0.101534 |
| <i>Arhgap31</i>      | chr16:38598339-38713274   | 4.0447   | 3.5116   | -0.2039 | 0.403121 |
| <i>Gm26792</i>       | chr19:46335286-46338538   | 3.3567   | 2.9217   | -0.2003 | 0.191799 |
| <i>5830416P10Rik</i> | chr19:53441211-53464796   | 5.2300   | 5.8114   | 0.1521  | 0.466331 |
| <i>5830428H23Rik</i> | chr19:61053839-61140840   | 12.0533  | 10.9147  | -0.1431 | 0.274361 |
| <i>Tmem70</i>        | chr1:16665206-16678275    | 15.8171  | 14.1685  | -0.1588 | 0.216369 |
| <i>Fam124b</i>       | chr1:80198705-80218473    | 0.7801   | 0.5789   | -0.4303 | 0.341584 |
| <i>Snrpd1</i>        | chr18:10617795-10628230   | 38.7046  | 44.2717  | 0.1939  | 0.469686 |
| <i>ldh3b</i>         | chr2:130279308-130284547  | 46.5963  | 48.6869  | 0.0633  | 0.263204 |
| <i>Gm11802</i>       | chr4:6688168-6704160      | 4.2721   | 3.4167   | -0.3223 | 0.089157 |
| <i>Raver2</i>        | chr4:101068982-101152370  | 6.2086   | 6.6155   | 0.0916  | 0.331619 |
| <i>Atp13a2</i>       | chr4:140986872-141007330  | 6.0090   | 5.4146   | -0.1503 | 0.263030 |
| <i>Cdk13</i>         | chr11:52004220-52089784   | 1.5957   | 1.7640   | 0.1447  | 0.152593 |
| <i>Scpep1</i>        | chr11:88924019-88955465   | 2.0677   | 2.4211   | 0.2276  | 0.345551 |
| <i>Myl4</i>          | chr11:104550662-104595753 | 0.2969   | 0.3869   | 0.3820  | 0.290754 |
| <i>Tbc1d16</i>       | chr11:119143044-119228499 | 3.0780   | 2.6989   | -0.1896 | 0.282492 |
| <i>Gm26698</i>       | chr12:86891403-86892567   | 5.7751   | 4.8641   | -0.2477 | 0.175408 |
| <i>Ccnk</i>          | chr12:108179737-108203359 | 7.3244   | 8.0941   | 0.1442  | 0.435425 |
| <i>Noa1</i>          | chr5:77294181-77310084    | 8.2511   | 7.5820   | -0.1220 | 0.070264 |
| <i>Whamm</i>         | chr7:81571291-81596836    | 10.6682  | 11.3300  | 0.0868  | 0.237434 |
| <i>Ppm1m</i>         | chr9:106194171-106199746  | 17.1110  | 15.5509  | -0.1379 | 0.228307 |
| <i>Snora70</i>       | chrX:74272483-74272620    | 40.3967  | 33.5691  | -0.2671 | 0.236319 |
| <i>Ttc38</i>         | chr15:85832305-85858822   | 11.0924  | 10.0685  | -0.1397 | 0.215862 |
| <i>Rhebl1</i>        | chr15:98877777-98881404   | 7.5852   | 6.6718   | -0.1851 | 0.230648 |
| <i>Acvr1b</i>        | chr15:101174103-101213678 | 13.7472  | 12.7153  | -0.1126 | 0.122939 |
| <i>Hacl1</i>         | chr14:31552904-31641286   | 3.4025   | 3.0404   | -0.1623 | 0.175323 |
| <i>Dnajc15</i>       | chr14:77826216-77874917   | 252.8231 | 279.0614 | 0.1425  | 0.448225 |
| <i>Zfp148</i>        | chr16:33380774-33503903   | 19.8881  | 20.8689  | 0.0695  | 0.288062 |
| <i>Dnajc4</i>        | chr19:6987910-6992503     | 10.5088  | 11.8324  | 0.1711  | 0.365362 |
| <i>Col9a3</i>        | chr2:180597789-180622189  | 1.1217   | 0.9198   | -0.2864 | 0.227672 |
| <i>Slc22a15</i>      | chr3:101858953-101924453  | 0.1426   | 0.1824   | 0.3556  | 0.297669 |
| <i>Zfp266</i>        | chr9:20495067-20521417    | 19.3541  | 20.3669  | 0.0736  | 0.302834 |
| <i>Trim35</i>        | chr14:66297030-66311424   | 20.5948  | 19.0411  | -0.1132 | 0.151459 |
| <i>Gm11944</i>       | chr11:3308995-3320722     | 6.0050   | 5.0839   | -0.2402 | 0.102368 |
| <i>Ppp2r3c</i>       | chr12:55280813-55303000   | 8.3348   | 7.2698   | -0.1972 | 0.325676 |
| <i>Mir1190</i>       | chr12:101021672-101021793 | 9.6371   | 6.6843   | -0.5278 | 0.213532 |
| <i>Pds5a</i>         | chr5:65615259-65697856    | 78.9774  | 72.9601  | -0.1143 | 0.207795 |
| <i>Ccdc126</i>       | chr6:49319273-49341582    | 5.1136   | 4.5030   | -0.1835 | 0.165083 |
| <i>Dera</i>          | chr6:137754541-137837891  | 15.8529  | 14.3779  | -0.1409 | 0.157313 |
| <i>Hmgb4</i>         | chr8:74993355-75031978    | 10.8515  | 11.5033  | 0.0842  | 0.348591 |
| <i>4930594C11Rik</i> | chr1:37487192-37488982    | 2.3909   | 2.8109   | 0.2334  | 0.348233 |
| <i>Pxmp4</i>         | chr2:154585757-154603708  | 5.9422   | 6.4790   | 0.1248  | 0.286541 |
| <i>Cct3</i>          | chr3:88297115-88321767    | 52.0428  | 47.2128  | -0.1405 | 0.274374 |
| <i>Snd1</i>          | chr6:28475138-28935162    | 25.3385  | 23.3267  | -0.1194 | 0.260775 |
| <i>Nfatc2</i>        | chr2:168476409-168601657  | 3.7104   | 4.1653   | 0.1668  | 0.494173 |
| <i>Prmt1</i>         | chr7:44975988-44986492    | 13.2299  | 12.0268  | -0.1375 | 0.170437 |
| <i>Evl</i>           | chr12:108554719-108688513 | 189.2237 | 199.6225 | 0.0772  | 0.383765 |
| <i>Zfp110</i>        | chr7:12834760-12850577    | 34.5168  | 31.5688  | -0.1288 | 0.219872 |
| <i>Gm16034</i>       | chr11:46143896-46145014   | 20.6482  | 17.5258  | -0.2365 | 0.329172 |
| <i>Myo1f</i>         | chr17:33555718-33607764   | 34.5432  | 37.3358  | 0.1122  | 0.475790 |
| <i>Nlrc3</i>         | chr16:3945006-3976632     | 25.8860  | 23.3646  | -0.1478 | 0.331792 |
| <i>Erb2ip</i>        | chr13:103818786-103920514 | 80.4846  | 84.2097  | 0.0653  | 0.302765 |
| <i>Hk1</i>           | chr10:62268854-62379908   | 18.3859  | 19.6898  | 0.0988  | 0.439664 |
| <i>Thop1</i>         | chr10:81070034-81082559   | 2.6394   | 2.8672   | 0.1194  | 0.169850 |
| <i>NA</i>            | chr10:89724749-89724875   | 4.9879   | 7.2517   | 0.5399  | 0.200616 |
| <i>Gm19967</i>       | chr11:70864659-70872754   | 1.1538   | 1.3797   | 0.2579  | 0.090800 |
| <i>Vps53</i>         | chr11:76046225-76179647   | 9.7889   | 10.3096  | 0.0748  | 0.243136 |
| <i>Rnmtl1</i>        | chr11:76243714-76250619   | 8.2349   | 8.9307   | 0.1170  | 0.258709 |
| <i>Timp2</i>         | chr11:118301068-118355740 | 9.4432   | 8.7053   | -0.1174 | 0.053143 |
| <i>Gm26723</i>       | chr12:100208987-100209814 | 28.8852  | 31.1095  | 0.1070  | 0.295135 |
| <i>Otub2</i>         | chr12:103388681-103406350 | 2.0822   | 1.7931   | -0.2156 | 0.194933 |
| <i>Gm17655</i>       | chr5:110046231-110046486  | 4.8126   | 3.4200   | -0.4928 | 0.166084 |
| <i>Coro1c</i>        | chr5:113842435-113908758  | 9.7171   | 10.4720  | 0.1079  | 0.445670 |
| <i>Gtf2h3</i>        | chr5:124579139-124597680  | 9.9198   | 8.9023   | -0.1561 | 0.259387 |
| <i>Klrb1f</i>        | chr6:129045900-129057471  | 0.7911   | 1.1720   | 0.5670  | 0.456866 |
| <i>Chmp2a</i>        | chr7:13032005-13034777    | 99.3515  | 107.2738 | 0.1107  | 0.400783 |
| <i>Gas2</i>          | chr7:51862014-51994975    | 0.9058   | 1.0642   | 0.2325  | 0.365329 |
| <i>ldh2</i>          | chr7:80094845-80115392    | 26.4258  | 23.7100  | -0.1565 | 0.285575 |
| <i>Btbd10</i>        | chr7:113315625-113369392  | 5.0207   | 4.5231   | -0.1506 | 0.225333 |

|                      |                           |          |          |         |          |
|----------------------|---------------------------|----------|----------|---------|----------|
| <i>B4galnt4</i>      | chr7:141061273-141072119  | 0.5698   | 0.4181   | -0.4466 | 0.281996 |
| <i>Enkd1</i>         | chr8:105703654-105707933  | 1.6751   | 1.2958   | -0.3704 | 0.149888 |
| <i>Gm22455</i>       | chr9:64177122-64177193    | 16.1413  | 11.0998  | -0.5402 | 0.236687 |
| <i>Slc22a13b-ps</i>  | chr9:119220487-119231692  | 0.5385   | 0.3566   | -0.5947 | 0.303352 |
| <i>Golph3</i>        | chr15:12321495-12351265   | 60.0701  | 63.7968  | 0.0868  | 0.372751 |
| <i>Gm17546</i>       | chr15:95824458-95830072   | 1.3438   | 0.8361   | -0.6846 | 0.349961 |
| <i>Asic1</i>         | chr15:99670717-99701127   | 1.2769   | 1.0738   | -0.2500 | 0.163605 |
| <i>Sacs</i>          | chr14:61138456-61240695   | 15.9404  | 14.5865  | -0.1280 | 0.278365 |
| <i>Rb1</i>           | chr14:73183672-73325822   | 16.8284  | 17.7977  | 0.0808  | 0.358530 |
| <i>Dnajc3</i>        | chr14:118937931-118981702 | 64.6148  | 59.9804  | -0.1074 | 0.157177 |
| <i>Zfp598</i>        | chr17:24669751-24682015   | 18.2456  | 16.8465  | -0.1151 | 0.125696 |
| <i>Anks1</i>         | chr17:27909339-28062600   | 6.2020   | 5.6590   | -0.1322 | 0.216124 |
| <i>C920025E04Rik</i> | chr17:36109233-36111658   | 10.2729  | 8.9540   | -0.1982 | 0.197719 |
| <i>Slc35b2</i>       | chr17:45563963-45567669   | 10.5918  | 9.6971   | -0.1273 | 0.008133 |
| <i>Slc29a1</i>       | chr17:45585199-45599606   | 10.6030  | 11.2578  | 0.0865  | 0.337860 |
| <i>Comt</i>          | chr16:18406885-18426852   | 6.2717   | 6.8803   | 0.1336  | 0.332278 |
| <i>Filip1l</i>       | chr16:57353092-57573126   | 17.4835  | 18.7655  | 0.1021  | 0.381951 |
| <i>Tm7sf2</i>        | chr19:6062820-6068373     | 4.7941   | 4.2412   | -0.1768 | 0.249766 |
| <i>Ranbp6</i>        | chr19:29808107-29812974   | 23.8698  | 21.4849  | -0.1519 | 0.312070 |
| <i>Bloc1s2</i>       | chr19:44139265-44146446   | 5.3485   | 4.3752   | -0.2898 | 0.247422 |
| <i>Atg16l1</i>       | chr1:87755869-87792428    | 13.8033  | 12.9309  | -0.0942 | 0.082877 |
| <i>4930562F07Rik</i> | chr1:160074734-160077985  | 67.5312  | 70.6775  | 0.0657  | 0.202106 |
| <i>Atf6</i>          | chr1:170704673-170867771  | 2.1169   | 2.3959   | 0.1786  | 0.482732 |
| <i>Dtwd2</i>         | chr18:49696144-49755601   | 2.8482   | 3.1894   | 0.1632  | 0.334360 |
| <i>Smad2</i>         | chr18:76241579-76305731   | 23.1749  | 24.2605  | 0.0660  | 0.166761 |
| <i>Trmt6</i>         | chr2:132804206-132816055  | 12.9091  | 13.6140  | 0.0767  | 0.324466 |
| <i>Ufm1</i>          | chr3:53855211-53863830    | 8.3201   | 8.8222   | 0.0845  | 0.262974 |
| <i>Gm12490</i>       | chr3:101260916-101261476  | 4.3247   | 5.4132   | 0.3239  | 0.339386 |
| <i>Tmod1</i>         | chr4:46038934-46116032    | 4.9395   | 4.4451   | -0.1521 | 0.148338 |
| <i>Grin3a</i>        | chr4:49661610-49845744    | 0.4623   | 0.3808   | -0.2798 | 0.304981 |
| <i>Rps8</i>          | chr4:117153826-117156243  | 59.4694  | 51.7935  | -0.1994 | 0.378494 |
| <i>Trim62</i>        | chr4:128883579-128911328  | 0.5233   | 0.6324   | 0.2731  | 0.213601 |
| <i>Gm13212</i>       | chr4:145585165-145625345  | 2.7516   | 3.1673   | 0.2030  | 0.357118 |
| <i>Slfm4</i>         | chr11:83175185-83190221   | 0.2350   | 0.3602   | 0.6163  | 0.435308 |
| <i>Wdr55</i>         | chr18:36760238-36763708   | 29.3133  | 31.5521  | 0.1062  | 0.372951 |
| <i>Atp10d</i>        | chr5:72203328-72298775    | 16.3303  | 14.8389  | -0.1382 | 0.298407 |
| <i>Mmp19</i>         | chr10:128790952-128800824 | 0.3884   | 0.4964   | 0.3539  | 0.204665 |
| <i>NA</i>            | chr11:75696390-75696461   | 14.6839  | 19.3635  | 0.3991  | 0.145674 |
| <i>Gm11714</i>       | chr11:107428275-107435686 | 4.2541   | 5.1820   | 0.2846  | 0.427682 |
| <i>Kctd2</i>         | chr11:115420127-115431274 | 19.9563  | 18.2183  | -0.1315 | 0.234424 |
| <i>Cd7</i>           | chr11:121036746-121039418 | 117.4183 | 106.1454 | -0.1456 | 0.309285 |
| <i>Baz1a</i>         | chr12:54892988-55014348   | 29.9487  | 31.4538  | 0.0707  | 0.361594 |
| <i>Hist1h2bk</i>     | chr13:22035820-22036299   | 9.2240   | 11.1858  | 0.2782  | 0.447197 |
| <i>NA</i>            | chr13:104173721-104178439 | 10.7893  | 11.7646  | 0.1248  | 0.307203 |
| <i>Gm26079</i>       | chr5:110692048-110692181  | 17.0800  | 12.0874  | -0.4988 | 0.382432 |
| <i>Mphosph9</i>      | chr5:124250958-124327972  | 8.3483   | 8.9635   | 0.1026  | 0.467768 |
| <i>Gm20605</i>       | chr5:137629174-137642899  | 34.9768  | 32.1080  | -0.1235 | 0.245448 |
| <i>Gm15612</i>       | chr6:88842853-88847274    | 0.2183   | 0.3006   | 0.4617  | 0.032551 |
| <i>Necap1</i>        | chr6:122874556-122888934  | 12.5800  | 11.4308  | -0.1382 | 0.176524 |
| <i>Suv420h2</i>      | chr7:4740114-4747514      | 6.0513   | 6.6029   | 0.1259  | 0.414909 |
| <i>Snrpa1</i>        | chr7:66060298-66074582    | 19.9653  | 18.3971  | -0.1180 | 0.113262 |
| <i>Spon1</i>         | chr7:113765997-114043370  | 2.6801   | 3.0314   | 0.1777  | 0.490590 |
| <i>Slc18a1</i>       | chr8:69037710-69089235    | 0.2068   | 0.1446   | -0.5157 | 0.178662 |
| <i>Usb1</i>          | chr8:95332291-95347507    | 9.7178   | 10.3461  | 0.0904  | 0.228589 |
| <i>4930524O07Rik</i> | chr9:106892170-106895182  | 1.3397   | 1.7007   | 0.3442  | 0.194619 |
| <i>Elk1</i>          | chrX:20933394-20950608    | 2.5512   | 2.7670   | 0.1171  | 0.223557 |
| <i>Magt1</i>         | chrX:105968083-106011906  | 26.0600  | 23.5003  | -0.1492 | 0.306507 |
| <i>Sharnp</i>        | chr15:76347039-76351111   | 33.9740  | 35.6096  | 0.0678  | 0.327518 |
| <i>Gm26798</i>       | chr15:89211558-89215012   | 0.7034   | 0.8824   | 0.3271  | 0.289563 |
| <i>Traj22</i>        | chr14:54197247-54197307   | 164.5760 | 182.0639 | 0.1457  | 0.272895 |
| <i>Med4</i>          | chr14:73510048-73518545   | 25.5579  | 27.1820  | 0.0889  | 0.212062 |
| <i>Fbxl3</i>         | chr14:103080238-103099566 | 38.5782  | 40.1591  | 0.0579  | 0.230465 |
| <i>Pisd-ps2</i>      | chr17:3076577-3084183     | 7.6585   | 8.4710   | 0.1455  | 0.441651 |
| <i>Dpp9</i>          | chr17:56186681-56218889   | 14.0583  | 12.9155  | -0.1223 | 0.184786 |
| <i>Ufd1l</i>         | chr16:18811778-18835261   | 18.3105  | 16.8287  | -0.1217 | 0.227159 |
| <i>Ndufb4</i>        | chr16:37647169-37654453   | 9.4960   | 8.0532   | -0.2378 | 0.323992 |
| <i>Gm25855</i>       | chr19:8723995-8724060     | 49.3496  | 39.4589  | -0.3227 | 0.219571 |
| <i>Scd4</i>          | chr19:44333091-44346743   | 0.4197   | 0.3214   | -0.3851 | 0.017926 |
| <i>Trub1</i>         | chr19:57452905-57491005   | 5.7711   | 6.1159   | 0.0837  | 0.289116 |
| <i>Bivm</i>          | chr1:44118956-44144770    | 3.4840   | 3.8572   | 0.1468  | 0.378913 |
| <i>Nab1</i>          | chr1:52457293-52500679    | 33.0249  | 34.9290  | 0.0809  | 0.368986 |

|                      |                           |          |          |         |          |
|----------------------|---------------------------|----------|----------|---------|----------|
| <i>Pde6d</i>         | chr1:86542993-86582629    | 4.2808   | 4.8412   | 0.1775  | 0.364811 |
| <i>Pigm</i>          | chr1:172376530-172384099  | 16.1865  | 15.0710  | -0.1030 | 0.136475 |
| <i>Greb1l</i>        | chr18:10325176-10562934   | 1.1841   | 1.0332   | -0.1967 | 0.285078 |
| <i>Gm15337</i>       | chr18:39367037-39389425   | 0.4256   | 0.5472   | 0.3626  | 0.299451 |
| <i>Txn1l</i>         | chr18:63662800-63692359   | 19.8391  | 17.9957  | -0.1407 | 0.233795 |
| <i>Gm13331</i>       | chr2:23508859-23509307    | 15.8314  | 13.4193  | -0.2385 | 0.242956 |
| <i>Ogfr</i>          | chr2:180589244-180595836  | 45.7674  | 42.2020  | -0.1170 | 0.179294 |
| <i>Sit1</i>          | chr4:43482080-43483734    | 48.1829  | 43.5381  | -0.1462 | 0.249148 |
| <i>Pank4</i>         | chr4:154964122-154980938  | 28.4760  | 26.5730  | -0.0998 | 0.083643 |
| <i>Sptan1</i>        | chr2:29965559-30031451    | 79.5404  | 74.4483  | -0.0954 | 0.120328 |
| <i>Kccn1</i>         | chr7:46396496-46438375    | 2.6907   | 2.3048   | -0.2234 | 0.383936 |
| <i>Sbk1</i>          | chr7:126272618-126294999  | 28.3441  | 25.7824  | -0.1367 | 0.310080 |
| <i>Fnbp4</i>         | chr2:90745369-90781021    | 47.0596  | 49.3881  | 0.0697  | 0.412210 |
| <i>Adss</i>          | chr1:177762961-177796511  | 39.9910  | 41.7732  | 0.0629  | 0.276947 |
| <i>Hist2h2be</i>     | chr3:96221120-96223738    | 8.5016   | 7.3041   | -0.2190 | 0.374143 |
| <i>Necap2</i>        | chr4:141066511-141078357  | 21.9043  | 20.3029  | -0.1095 | 0.114425 |
| <i>Ighv8-6</i>       | chr12:115165776-115166077 | 3.2326   | 2.1359   | -0.5979 | 0.281616 |
| <i>Tmem140</i>       | chr6:34863145-34874946    | 4.1539   | 4.5084   | 0.1182  | 0.413839 |
| <i>Zfp746</i>        | chr6:48062394-48086593    | 16.0261  | 16.8970  | 0.0763  | 0.317515 |
| <i>Adam9</i>         | chr8:24949610-25016922    | 2.2236   | 2.4898   | 0.1631  | 0.336564 |
| <i>Atxn1l</i>        | chr8:109726450-109737739  | 10.4763  | 9.7135   | -0.1091 | 0.119252 |
| <i>Ankrd49</i>       | chr9:14780208-14782964    | 24.9712  | 26.7628  | 0.1000  | 0.376141 |
| <i>Dapk2</i>         | chr9:66158222-66272242    | 0.8602   | 1.1025   | 0.3581  | 0.400255 |
| <i>Prkaa1</i>        | chr15:5143860-5181899     | 22.1355  | 23.2004  | 0.0678  | 0.253635 |
| <i>Pgp</i>           | chr17:24470472-24471591   | 9.5083   | 8.0346   | -0.2430 | 0.317368 |
| <i>Telo2</i>         | chr17:25099569-25115967   | 5.1769   | 4.7214   | -0.1329 | 0.237079 |
| <i>Stambp1l</i>      | chr19:34192228-34240333   | 12.7951  | 13.4948  | 0.0768  | 0.242269 |
| <i>Nars</i>          | chr18:64499664-64516557   | 53.6277  | 56.4659  | 0.0744  | 0.326016 |
| <i>Madd</i>          | chr2:91137359-91183837    | 40.6876  | 37.5890  | -0.1143 | 0.242188 |
| <i>P2ry14</i>        | chr3:59114625-59130624    | 0.5565   | 0.7847   | 0.4957  | 0.391293 |
| <i>Ipp</i>           | chr4:116507548-116538243  | 6.1273   | 5.4735   | -0.1628 | 0.089515 |
| <i>Rcc2</i>          | chr4:140700540-140723220  | 53.1582  | 48.8355  | -0.1224 | 0.248206 |
| <i>Rnu11</i>         | chr4:132270079-132270213  | 95.2236  | 123.9361 | 0.3802  | 0.354905 |
| <i>Gm7457</i>        | chr6:142814230-142833494  | 0.7268   | 0.8641   | 0.2496  | 0.228734 |
| <i>Gm9988</i>        | chr8:88138078-88138517    | 8.7543   | 6.9882   | -0.3251 | 0.292882 |
| <i>Gm25492</i>       | chr5:135053987-135054116  | 7.0100   | 4.0618   | -0.7873 | 0.314399 |
| <i>Dhx37</i>         | chr5:125414405-125434048  | 8.6032   | 7.8004   | -0.1413 | 0.252188 |
| <i>Hbs1l</i>         | chr10:21295978-21368889   | 15.0588  | 13.9154  | -0.1139 | 0.160884 |
| <i>Arhgap18</i>      | chr10:26753420-26918648   | 9.8092   | 10.4156  | 0.0865  | 0.256835 |
| <i>Rwdd1</i>         | chr10:33996554-34019624   | 12.0486  | 13.1730  | 0.1287  | 0.311253 |
| <i>Qrs1l</i>         | chr10:43874187-43901745   | 6.1799   | 5.5281   | -0.1608 | 0.249550 |
| <i>Slc25a3</i>       | chr10:91116573-91124059   | 52.7862  | 49.6210  | -0.0892 | 0.106896 |
| <i>4933408J17Rik</i> | chr10:93589412-93605245   | 0.8399   | 0.5950   | -0.4974 | 0.277877 |
| <i>Erb3</i>          | chr10:128567522-128589652 | 1.3523   | 2.0060   | 0.5689  | 0.268231 |
| <i>Fnip1</i>         | chr11:54438198-54518235   | 13.1880  | 13.8749  | 0.0732  | 0.316078 |
| <i>4933439C10Rik</i> | chr11:59505661-59513647   | 2.2075   | 2.4070   | 0.1249  | 0.290030 |
| <i>Cenpv</i>         | chr11:62524945-62539261   | 3.8083   | 4.4731   | 0.2322  | 0.437540 |
| <i>Gm17235</i>       | chr11:78576236-78577350   | 2.1151   | 1.6159   | -0.3884 | 0.272434 |
| <i>Gm8738</i>        | chr11:103879914-103880243 | 2.9006   | 1.9298   | -0.5879 | 0.264878 |
| <i>Strada</i>        | chr11:106163329-106202168 | 9.9222   | 10.4374  | 0.0730  | 0.311605 |
| <i>Slc16a3</i>       | chr11:120948479-120960868 | 0.9743   | 0.8269   | -0.2367 | 0.161169 |
| <i>Zfp750</i>        | chr11:121510977-121519333 | 0.7822   | 0.9759   | 0.3191  | 0.447667 |
| <i>Nrde2</i>         | chr12:100125451-100159653 | 19.1892  | 20.2100  | 0.0748  | 0.340842 |
| <i>Asb2</i>          | chr12:103321141-103356001 | 0.2362   | 0.3726   | 0.6573  | 0.300056 |
| <i>Vrk1</i>          | chr12:106010262-106077410 | 16.6165  | 17.6037  | 0.0833  | 0.319691 |
| <i>F12</i>           | chr13:55417957-55426793   | 0.5759   | 0.3942   | -0.5469 | 0.231477 |
| <i>Aggf1</i>         | chr13:95350682-95375352   | 24.6268  | 22.9180  | -0.1038 | 0.090175 |
| <i>Il6st</i>         | chr13:112475007-112506860 | 110.1762 | 101.8105 | -0.1139 | 0.252596 |
| <i>Mrfap1</i>        | chr5:36794866-36796772    | 29.4048  | 26.9221  | -0.1273 | 0.159015 |
| <i>Ptpn13</i>        | chr5:103425191-103598359  | 0.9121   | 1.2642   | 0.4710  | 0.399607 |
| <i>Stx2</i>          | chr5:128984556-129008574  | 13.5198  | 12.3375  | -0.1320 | 0.202083 |
| <i>Dnajc30</i>       | chr5:135064205-135065365  | 7.6408   | 8.5610   | 0.1641  | 0.341952 |
| <i>Trbv16</i>        | chr6:41151790-41152225    | 115.6023 | 102.4597 | -0.1741 | 0.313376 |
| <i>Trbv17</i>        | chr6:41163091-41163551    | 97.5460  | 87.3258  | -0.1597 | 0.274474 |
| <i>Lrrc61</i>        | chr6:48554795-48570722    | 4.3024   | 4.8252   | 0.1655  | 0.408430 |
| <i>Arhgef1</i>       | chr7:24902911-24926592    | 89.2735  | 81.5072  | -0.1313 | 0.318357 |
| <i>Gtf2h1</i>        | chr7:46796102-46823800    | 34.0177  | 36.4563  | 0.0999  | 0.400500 |
| <i>Rccd1</i>         | chr7:80316595-80324454    | 7.8007   | 8.3134   | 0.0918  | 0.296797 |
| <i>Dctpp1</i>        | chr7:127256958-127260709  | 15.1301  | 13.1376  | -0.2037 | 0.234807 |
| <i>Tubgcp2</i>       | chr7:139995954-140036350  | 15.5301  | 16.2838  | 0.0684  | 0.194427 |
| <i>Rnf122</i>        | chr8:31111819-31131482    | 4.0880   | 4.4641   | 0.1270  | 0.413635 |

|                      |                           |         |         |         |          |
|----------------------|---------------------------|---------|---------|---------|----------|
| <i>Ano8</i>          | chr8:71476022-71486067    | 10.0457 | 9.1553  | -0.1339 | 0.210848 |
| <i>Ndufb7</i>        | chr8:83566670-83571626    | 10.8789 | 9.7060  | -0.1646 | 0.308395 |
| <i>Asna1</i>         | chr8:85017933-85025278    | 33.7475 | 36.9104 | 0.1292  | 0.435547 |
| <i>4921524J17Rik</i> | chr8:85408758-85432841    | 7.4227  | 8.3556  | 0.1708  | 0.388877 |
| <i>Tradd</i>         | chr8:105258285-105264609  | 20.2830 | 18.7177 | -0.1159 | 0.029592 |
| <i>Slc9a7</i>        | chrX:20105754-20291807    | 4.5948  | 5.0646  | 0.1404  | 0.437398 |
| <i>NA</i>            | chrX:150408583-150440905  | 4.2437  | 4.8590  | 0.1954  | 0.271562 |
| <i>G530011O06Rik</i> | chrX:169975042-169978917  | 0.9980  | 1.2847  | 0.3643  | 0.468896 |
| <i>2610037D02Rik</i> | chr15:96134818-96283608   | 1.3928  | 1.2048  | -0.2092 | 0.138012 |
| <i>Usp54</i>         | chr14:20548911-20618354   | 1.2923  | 1.4218  | 0.1378  | 0.283174 |
| <i>Zfand3</i>        | chr17:30005086-30210019   | 17.9023 | 18.9345 | 0.0809  | 0.258612 |
| <i>Zfp263</i>        | chr16:3744092-3750790     | 29.4868 | 27.3126 | -0.1105 | 0.183867 |
| <i>Pmm2</i>          | chr16:8637673-8657531     | 23.2311 | 21.5557 | -0.1080 | 0.194641 |
| <i>Mzt2</i>          | chr16:15848440-15863369   | 4.9664  | 4.2466  | -0.2259 | 0.125952 |
| <i>Adcy5</i>         | chr16:35154876-35305737   | 0.3010  | 0.3700  | 0.2979  | 0.250068 |
| <i>Trat1</i>         | chr16:48734689-48771956   | 20.6253 | 17.2731 | -0.2559 | 0.408967 |
| <i>Atp5o</i>         | chr16:91684397-91931687   | 41.9111 | 37.3163 | -0.1675 | 0.338355 |
| <i>Banf1</i>         | chr19:5364640-5366645     | 59.0773 | 65.5983 | 0.1511  | 0.463066 |
| <i>Hnrnpul2</i>      | chr19:8819400-8834142     | 25.5184 | 26.6185 | 0.0609  | 0.347425 |
| <i>Gm26874</i>       | chr19:57459571-57461553   | 0.4334  | 0.5861  | 0.4356  | 0.058584 |
| <i>Ptpn4</i>         | chr1:119658043-119837613  | 14.1030 | 14.9671 | 0.0858  | 0.434881 |
| <i>Ralgsps2</i>      | chr1:156804165-156939626  | 10.5077 | 9.7371  | -0.1099 | 0.115529 |
| <i>Hsd11b1</i>       | chr1:193221629-193264054  | 44.1957 | 40.4978 | -0.1261 | 0.230015 |
| <i>Gm26865</i>       | chr18:4373668-4379980     | 3.0035  | 2.6427  | -0.1846 | 0.135610 |
| <i>Tcerg1</i>        | chr18:42511509-42575551   | 23.9666 | 25.3301 | 0.0798  | 0.390684 |
| <i>Gm16146</i>       | chr18:84858635-84859547   | 3.3856  | 2.3684  | -0.5155 | 0.324971 |
| <i>Manbal</i>        | chr2:157367593-157396763  | 8.5958  | 7.4898  | -0.1987 | 0.229314 |
| <i>4930579G24Rik</i> | chr3:79629078-79632817    | 2.5727  | 2.1445  | -0.2627 | 0.212424 |
| <i>Ampd1</i>         | chr3:103074013-103099714  | 8.4308  | 7.2912  | -0.2095 | 0.354359 |
| <i>Cept1</i>         | chr3:106502259-106547802  | 42.5209 | 45.3196 | 0.0920  | 0.390439 |
| <i>Tmem222</i>       | chr4:133266044-133277792  | 17.9708 | 18.9911 | 0.0797  | 0.210628 |
| <i>Gm13166</i>       | chr4:146251828-146278434  | 1.0338  | 1.3123  | 0.3442  | 0.285744 |
| <i>Gm11476</i>       | chr2:167553313-167607845  | 0.4405  | 0.2989  | -0.5598 | 0.168083 |
| <i>Cdc6</i>          | chr11:98907800-98923940   | 1.1699  | 1.3482  | 0.2047  | 0.407356 |
| <i>Ddx42</i>         | chr11:106216925-106249139 | 53.6255 | 55.6291 | 0.0529  | 0.236236 |
| <i>AA987161</i>      | chr13:67589442-67609707   | 17.7354 | 19.0390 | 0.1023  | 0.418065 |
| <i>Dtx1</i>          | chr5:120680201-120711927  | 76.4279 | 81.1686 | 0.0868  | 0.463385 |
| <i>Gm16536</i>       | chr9:45856768-45858357    | 7.5869  | 6.7545  | -0.1677 | 0.111611 |
| <i>Mbnl3</i>         | chrX:51117268-51206532    | 4.1126  | 4.4092  | 0.1005  | 0.353478 |
| <i>Lrrc24</i>        | chr15:76715275-76722173   | 2.5809  | 2.2020  | -0.2291 | 0.150279 |
| <i>Ptms</i>          | chr6:124913680-124917946  | 4.1087  | 4.8459  | 0.2381  | 0.452601 |
| <i>Cnp</i>           | chr11:100574903-100591729 | 74.7109 | 69.6067 | -0.1021 | 0.127514 |
| <i>Gm15712</i>       | chr16:43184572-43185728   | 1.3339  | 1.0126  | -0.3976 | 0.073886 |
| <i>Kcnq5</i>         | chr1:21398402-21961942    | 1.4356  | 1.6203  | 0.1746  | 0.411240 |
| <i>Ntan1</i>         | chr16:13819250-13835451   | 27.3756 | 28.5660 | 0.0614  | 0.174277 |
| <i>Cactin</i>        | chr10:81321102-81326251   | 23.1384 | 21.0379 | -0.1373 | 0.271218 |
| <i>Akirin1-ps</i>    | chr11:85216596-85217054   | 1.3930  | 2.0926  | 0.5871  | 0.384467 |
| <i>Raf1</i>          | chr6:115618066-115676635  | 39.0191 | 36.5205 | -0.0955 | 0.117263 |
| <i>Il2orb</i>        | chr9:100457718-100486788  | 0.9078  | 1.0884  | 0.2618  | 0.378540 |
| <i>Ube2v2</i>        | chr16:15552676-15594524   | 2.8392  | 3.1088  | 0.1309  | 0.302038 |
| <i>9230111E07Rik</i> | chr2:167782052-167783486  | 5.4207  | 4.3872  | -0.3052 | 0.334250 |
| <i>Dcun1d1</i>       | chr3:35892104-35937445    | 6.3595  | 6.7159  | 0.0787  | 0.169819 |
| <i>Gm11942</i>       | chr4:32964887-32965232    | 4.6572  | 3.4459  | -0.4346 | 0.227702 |
| <i>Zfp322a</i>       | chr13:23353102-23369208   | 17.4255 | 15.9287 | -0.1296 | 0.253707 |
| <i>Dnah11</i>        | chr12:117877981-118199043 | 1.0513  | 0.9458  | -0.1526 | 0.077032 |
| <i>A930041C12Rik</i> | chr5:107630249-107633850  | 2.0651  | 2.6997  | 0.3866  | 0.276750 |
| <i>Lca5</i>          | chr9:83390292-83441127    | 2.0720  | 1.8589  | -0.1565 | 0.063886 |
| <i>Mrp13</i>         | chr9:105053238-105077466  | 16.8107 | 15.3993 | -0.1265 | 0.194097 |
| <i>Suv420h1</i>      | chr19:3767420-3818303     | 17.2641 | 16.1873 | -0.0929 | 0.081489 |
| <i>Trmt112</i>       | chr19:6909697-6911049     | 8.4989  | 7.5042  | -0.1796 | 0.138735 |
| <i>Mrps9</i>         | chr1:42851232-42905682    | 38.4611 | 40.7306 | 0.0827  | 0.272330 |
| <i>Rpl21</i>         | chr5:146832889-146837032  | 9.8721  | 10.6559 | 0.1102  | 0.384675 |
| <i>Bud13</i>         | chr9:46283007-46298783    | 5.6451  | 6.0947  | 0.1105  | 0.350832 |
| <i>Sik2</i>          | chr9:50892800-51009073    | 5.0101  | 4.5462  | -0.1402 | 0.295696 |
| <i>Gm16059</i>       | chr15:79427219-79431629   | 0.9049  | 0.7469  | -0.2767 | 0.113523 |
| <i>Gm26732</i>       | chr16:44329996-44333050   | 19.2958 | 21.5339 | 0.1583  | 0.496623 |
| <i>Gm15929</i>       | chr7:3666251-3670278      | 2.1775  | 1.7097  | -0.3489 | 0.258320 |
| <i>Tdrd3</i>         | chr14:87416638-87545373   | 6.3615  | 6.7038  | 0.0756  | 0.127476 |
| <i>Tmem261</i>       | chr4:75277353-75278305    | 50.2275 | 44.2613 | -0.1824 | 0.338576 |
| <i>Txk</i>           | chr5:72695977-72752773    | 76.2565 | 78.6611 | 0.0448  | 0.251010 |
| <i>Gm17022</i>       | chr8:13086508-13087430    | 2.4571  | 2.9624  | 0.2698  | 0.255915 |

|                      |                           |          |          |         |          |
|----------------------|---------------------------|----------|----------|---------|----------|
| <i>Nrp1</i>          | chr8:128359072-128505462  | 0.8850   | 1.0630   | 0.2643  | 0.486072 |
| <i>Gm20427</i>       | chr17:34026033-34031572   | 53.0162  | 49.2904  | -0.1051 | 0.152779 |
| <i>Ppa1</i>          | chr10:61648551-61674168   | 14.9621  | 16.0816  | 0.1041  | 0.397187 |
| <i>Arhgap27os2</i>   | chr11:103355700-103361092 | 1.1536   | 0.8806   | -0.3896 | 0.099155 |
| <i>Mrpl38</i>        | chr11:116131816-116138868 | 10.9888  | 11.7637  | 0.0983  | 0.297413 |
| <i>Lyst</i>          | chr13:13590408-13777440   | 50.5319  | 46.0588  | -0.1337 | 0.326283 |
| <i>F2rl1</i>         | chr13:95511731-95525240   | 21.4996  | 23.0982  | 0.1035  | 0.455143 |
| <i>Gm15478</i>       | chr5:67642400-67646776    | 1.1344   | 0.8963   | -0.3399 | 0.219918 |
| <i>Endod1</i>        | chr9:14353989-14381242    | 4.2394   | 5.2877   | 0.3188  | 0.381822 |
| <i>Trcg1</i>         | chr9:57236555-57249863    | 0.3494   | 0.2383   | -0.5521 | 0.188099 |
| <i>Il18rap</i>       | chr1:40515361-40551705    | 12.2115  | 14.5857  | 0.2563  | 0.389958 |
| <i>Gm15445</i>       | chr1:135152962-135153806  | 2.2754   | 2.8816   | 0.3407  | 0.100277 |
| <i>Hspa4l</i>        | chr3:40744494-40796103    | 4.7737   | 4.3487   | -0.1345 | 0.251472 |
| <i>Ikbkap</i>        | chr4:56749679-56802331    | 15.0139  | 13.8420  | -0.1172 | 0.239211 |
| <i>Supt4a</i>        | chr11:87737551-87743623   | 52.0286  | 57.2139  | 0.1371  | 0.451656 |
| <i>Usp12</i>         | chr5:146734808-146795006  | 16.0023  | 14.8832  | -0.1046 | 0.105379 |
| <i>Snord15b</i>      | chr7:99479562-99479707    | 416.0235 | 320.7898 | -0.3750 | 0.332017 |
| <i>Dync1i2</i>       | chr2:71211705-71263303    | 14.3286  | 15.0327  | 0.0692  | 0.281208 |
| <i>Cd53</i>          | chr3:106758860-106790149  | 343.6357 | 362.5625 | 0.0774  | 0.395222 |
| <i>3110053B16Rik</i> | chr12:20874124-20921262   | 1.6258   | 1.3402   | -0.2787 | 0.206503 |
| <i>Tfam</i>          | chr10:71225463-71238280   | 21.1420  | 19.2804  | -0.1330 | 0.262825 |
| <i>Mmp28</i>         | chr11:83440767-83463071   | 0.2739   | 0.3589   | 0.3899  | 0.191344 |
| <i>Pxdc1</i>         | chr11:97923237-97986444   | 0.7519   | 0.6155   | -0.2886 | 0.248123 |
| <i>Itn2</i>          | chr12:4593007-4713950     | 70.0689  | 72.5111  | 0.0494  | 0.231683 |
| <i>Klf2a</i>         | chr13:106958995-107022126 | 9.0416   | 9.7243   | 0.1050  | 0.464216 |
| <i>2900005J15Rik</i> | chr5:25100982-25110109    | 1.2603   | 1.4821   | 0.2339  | 0.266500 |
| <i>Erp29</i>         | chr5:121428589-121452506  | 12.4278  | 11.5509  | -0.1056 | 0.111261 |
| <i>Gstk1</i>         | chr6:42245934-42250441    | 6.5266   | 5.5667   | -0.2295 | 0.183125 |
| <i>Txnrd3</i>        | chr6:89643987-89675529    | 1.3490   | 1.5773   | 0.2256  | 0.267879 |
| <i>Jagn1</i>         | chr6:113442568-113448229  | 17.0418  | 15.4297  | -0.1434 | 0.103583 |
| <i>Vrk3</i>          | chr7:44748412-44777515    | 19.3749  | 17.9206  | -0.1126 | 0.157492 |
| <i>1700122E12Rik</i> | chr8:84847187-84848415    | 1.5775   | 2.1647   | 0.4566  | 0.359130 |
| <i>Smad3</i>         | chr9:63646766-63757994    | 16.4315  | 17.7485  | 0.1112  | 0.480108 |
| <i>Cdv3</i>          | chr9:103353101-103365780  | 17.5034  | 16.2293  | -0.1090 | 0.143745 |
| <i>Gm26593</i>       | chrX:21360864-21364622    | 0.9460   | 1.1847   | 0.3247  | 0.271975 |
| <i>Ank</i>           | chr15:27466676-27594909   | 6.5366   | 7.1948   | 0.1384  | 0.469457 |
| <i>Snora2b</i>       | chr15:98526345-98526482   | 6.2933   | 4.2352   | -0.5714 | 0.177276 |
| <i>Traj13</i>        | chr14:54205740-54205797   | 28.6941  | 36.7511  | 0.3570  | 0.406587 |
| <i>Thtpa</i>         | chr14:55094834-55098986   | 16.9624  | 18.1182  | 0.0951  | 0.402538 |
| <i>Gm16181</i>       | chr17:35220833-35224134   | 2.2209   | 2.8783   | 0.3741  | 0.165138 |
| <i>Usp49</i>         | chr17:47630689-47686738   | 2.2097   | 2.3743   | 0.1036  | 0.329974 |
| <i>Gpr108</i>        | chr17:57234913-57247641   | 20.3938  | 21.4413  | 0.0723  | 0.255105 |
| <i>Gm8425</i>        | chr16:36778833-36779602   | 1.1271   | 0.7621   | -0.5645 | 0.254435 |
| <i>Gm17518</i>       | chr16:90727511-90729120   | 0.8360   | 0.5971   | -0.4855 | 0.242852 |
| <i>Brwd1</i>         | chr16:95992091-96082526   | 14.6435  | 13.5877  | -0.1080 | 0.197618 |
| <i>A930007I19Rik</i> | chr19:29486354-29523159   | 0.2713   | 0.1943   | -0.4817 | 0.238953 |
| <i>Gm16244</i>       | chr19:42779031-42781454   | 0.8643   | 1.0665   | 0.3033  | 0.316148 |
| <i>Gm26670</i>       | chr1:191986831-191990138  | 0.5989   | 0.7450   | 0.3149  | 0.290866 |
| <i>Gm13423</i>       | chr2:23202032-23203683    | 2.5352   | 1.9992   | -0.3427 | 0.214950 |
| <i>Prrg4</i>         | chr2:104830740-104849876  | 3.2148   | 2.8426   | -0.1775 | 0.123262 |
| <i>Prpf38b</i>       | chr3:108902666-108911727  | 59.5060  | 62.9213  | 0.0805  | 0.435069 |
| <i>Gm12744</i>       | chr4:106587096-106589108  | 7.6356   | 6.2006   | -0.3003 | 0.317683 |
| <i>Eya3</i>          | chr4:132638986-132724765  | 12.4060  | 13.0489  | 0.0729  | 0.368503 |
| <i>Il4ra</i>         | chr7:12552281-125579472   | 69.4175  | 64.3360  | -0.1097 | 0.246090 |
| <i>Spdl1</i>         | chr11:34809189-34833641   | 1.8143   | 2.0934   | 0.2064  | 0.448336 |
| <i>Trbv4</i>         | chr6:41059442-41059881    | 66.6758  | 73.6545  | 0.1436  | 0.453778 |
| <i>Fam227b</i>       | chr2:125983482-126152004  | 0.7212   | 0.5504   | -0.3898 | 0.217862 |
| <i>Ifngr1</i>        | chr10:19591948-19610229   | 89.7247  | 95.1869  | 0.0853  | 0.476971 |
| <i>Bpnt1</i>         | chr1:185332148-185357777  | 9.7023   | 8.6810   | -0.1605 | 0.236500 |
| <i>Fkbp5</i>         | chr17:28399094-28517524   | 9.3798   | 8.6658   | -0.1142 | 0.175743 |
| <i>C030013D06Rik</i> | chr14:56733656-56734954   | 2.1214   | 1.6999   | -0.3195 | 0.199499 |
| <i>Dip2a</i>         | chr10:76259428-76345291   | 0.6727   | 0.7649   | 0.1853  | 0.321591 |
| <i>Pus10</i>         | chr11:23665673-23732876   | 9.6839   | 10.1619  | 0.0695  | 0.158088 |
| <i>Cbll1</i>         | chr12:31484828-31499616   | 3.4115   | 3.7783   | 0.1473  | 0.412859 |
| <i>Sri</i>           | chr5:8046077-8069379      | 51.1388  | 54.3435  | 0.0877  | 0.419362 |
| <i>Rfc1</i>          | chr5:65261851-65335670    | 22.9543  | 21.2901  | -0.1086 | 0.162837 |
| <i>Rac1</i>          | chr5:143505477-143528036  | 62.5564  | 58.4247  | -0.0986 | 0.120861 |
| <i>Ing2</i>          | chr8:47667177-47675556    | 6.4303   | 6.8685   | 0.0951  | 0.132284 |
| <i>Siah1b</i>        | chrX:164070704-164076493  | 1.3153   | 1.5967   | 0.2797  | 0.360850 |
| <i>Xpo7</i>          | chr14:70654245-70766628   | 9.6307   | 10.0034  | 0.0548  | 0.308511 |
| <i>Tb1l1xr1</i>      | chr3:22076651-22216594    | 34.8472  | 32.6860  | -0.0924 | 0.095592 |

|                      |                           |           |           |         |          |
|----------------------|---------------------------|-----------|-----------|---------|----------|
| <i>Erp44</i>         | chr4:48193322-48279558    | 18.9881   | 20.0546   | 0.0788  | 0.336810 |
| <i>Gm12250</i>       | chr11:58183842-58190198   | 45.2730   | 49.3543   | 0.1245  | 0.482235 |
| <i>Rnf213</i>        | chr11:119393099-119487418 | 103.8312  | 120.9820  | 0.2206  | 0.397472 |
| <i>Serf1</i>         | chr13:100107996-100114571 | 0.5179    | 0.7661    | 0.5650  | 0.225194 |
| <i>Smim15</i>        | chr13:108046423-108049146 | 50.6695   | 54.4946   | 0.1050  | 0.429891 |
| <i>Snrpd2</i>        | chr7:19149721-19152735    | 35.1085   | 30.4085   | -0.2073 | 0.369666 |
| <i>Coq7</i>          | chr7:118509658-118533356  | 1.1232    | 1.2756    | 0.1836  | 0.164365 |
| <i>Kat6a</i>         | chr8:22859534-22943259    | 25.8425   | 27.7052   | 0.1004  | 0.516161 |
| <i>Gm23136</i>       | chr9:64176660-64176759    | 11.0666   | 7.7821    | -0.5080 | 0.221460 |
| <i>Ccnb2</i>         | chr9:70407688-70421554    | 6.0772    | 8.0125    | 0.3988  | 0.385207 |
| <i>Twf1</i>          | chr15:94577950-94589889   | 12.7017   | 13.3347   | 0.0702  | 0.148846 |
| <i>Trav9-4</i>       | chr14:53676140-53676629   | 3.5157    | 2.5743    | -0.4497 | 0.223872 |
| <i>Vav1</i>          | chr17:57279099-57328031   | 73.2131   | 68.6406   | -0.0930 | 0.102089 |
| <i>Ptgfrn</i>        | chr3:101040231-101110278  | 1.8209    | 1.5967    | -0.1896 | 0.252118 |
| <i>Zswim5</i>        | chr4:116877375-116989264  | 0.2170    | 0.3037    | 0.4850  | 0.431423 |
| <i>Yeats4</i>        | chr10:117215141-117224507 | 42.9469   | 46.3080   | 0.1087  | 0.418712 |
| <i>Trmu</i>          | chr15:85879311-85897394   | 7.0241    | 7.5765    | 0.1092  | 0.442486 |
| <i>Tmem87b</i>       | chr2:128818117-128854261  | 11.5037   | 10.6825   | -0.1068 | 0.148186 |
| <i>Mansc1</i>        | chr6:134609209-134632488  | 0.7795    | 0.9616    | 0.3029  | 0.239428 |
| <i>Gm16755</i>       | chr11:120486338-120488582 | 8.5316    | 7.4588    | -0.1939 | 0.139891 |
| <i>Gcnt2</i>         | chr13:40859767-40960891   | 0.1989    | 0.2563    | 0.3656  | 0.358328 |
| <i>Zfand4</i>        | chr6:116264221-116330298  | 0.2810    | 0.3716    | 0.4032  | 0.287508 |
| <i>H2afj</i>         | chr6:136808247-136810074  | 47.1072   | 42.2394   | -0.1574 | 0.335376 |
| <i>Ngrn</i>          | chr7:80261214-80265374    | 24.6724   | 22.6104   | -0.1259 | 0.168220 |
| <i>Map3k8</i>        | chr18:4331326-4353015     | 7.8539    | 8.3739    | 0.0925  | 0.412598 |
| <i>Gm13012</i>       | chr4:137882369-137883937  | 6.2522    | 7.2328    | 0.2102  | 0.361652 |
| <i>Ankhd1</i>        | chr18:36559986-36665917   | 33.3984   | 34.5908   | 0.0506  | 0.278295 |
| <i>Tyw1</i>          | chr5:130255618-130341563  | 6.1061    | 5.6557    | -0.1105 | 0.090114 |
| <i>Syf2</i>          | chr4:134930897-134937548  | 74.1455   | 79.8692   | 0.1073  | 0.455545 |
| <i>Gm15283</i>       | chr12:73926480-73949785   | 17.1784   | 15.6296   | -0.1363 | 0.128147 |
| <i>Fam102b</i>       | chr3:108970996-109027607  | 9.8414    | 9.0274    | -0.1246 | 0.215212 |
| <i>Rps15</i>         | chr10:80292452-80294114   | 1013.7519 | 1115.4410 | 0.1379  | 0.487140 |
| <i>Gm17305</i>       | chr11:69364018-69369408   | 81.7609   | 90.4866   | 0.1463  | 0.480207 |
| <i>Sdhd</i>          | chr9:50596337-50603849    | 46.7240   | 42.9964   | -0.1199 | 0.173809 |
| <i>Mcts1</i>         | chrX:38600577-38613426    | 30.9407   | 27.9364   | -0.1474 | 0.282981 |
| <i>Elf4</i>          | chrX:48411045-48463132    | 16.5065   | 18.1332   | 0.1356  | 0.527148 |
| <i>lds</i>           | chrX:70343068-70365084    | 4.0272    | 4.4333    | 0.1386  | 0.466405 |
| <i>Xlr4c</i>         | chrX:73233687-73243130    | 3.9884    | 3.2621    | -0.2900 | 0.469567 |
| <i>Cd47</i>          | chr16:49855617-49915010   | 37.3316   | 40.2988   | 0.1103  | 0.520985 |
| <i>NA</i>            | chr1:33669842-33670712    | 1.6978    | 1.2839    | -0.4031 | 0.079873 |
| <i>Stoml2</i>        | chr4:43027689-43031710    | 13.0414   | 11.9062   | -0.1314 | 0.189997 |
| <i>Mrvi1</i>         | chr7:110868265-110982461  | 0.6926    | 0.5758    | -0.2665 | 0.297265 |
| <i>Sin3a</i>         | chr9:57072039-57128366    | 27.9603   | 29.2440   | 0.0648  | 0.385230 |
| <i>Gramd1c</i>       | chr16:43980349-44027945   | 2.7858    | 2.4545    | -0.1827 | 0.203539 |
| <i>Gm15793</i>       | chr1:66849107-66849602    | 2.1616    | 1.5264    | -0.5020 | 0.254500 |
| <i>Desi2</i>         | chr1:178187416-178252598  | 16.4335   | 15.0471   | -0.1272 | 0.275690 |
| <i>Pex2</i>          | chr3:5560187-5576239      | 16.8126   | 15.0686   | -0.1580 | 0.296367 |
| <i>Pom121</i>        | chr5:135376140-135394546  | 3.5186    | 3.8569    | 0.1324  | 0.450459 |
| <i>Gm17089</i>       | chr6:134233157-134243711  | 0.7882    | 1.0281    | 0.3833  | 0.166395 |
| <i>Vps33b</i>        | chr7:80269648-80291579    | 16.0819   | 14.8787   | -0.1122 | 0.152657 |
| <i>Cyp4f13</i>       | chr17:32924687-32947402   | 7.2698    | 8.0958    | 0.1553  | 0.522191 |
| <i>Rer1</i>          | chr4:155074109-155086382  | 78.5731   | 72.6624   | -0.1128 | 0.186847 |
| <i>Coro1b</i>        | chr19:4148618-4154035     | 59.9144   | 63.2124   | 0.0773  | 0.431897 |
| <i>Cdk4</i>          | chr10:127063533-127067920 | 45.9170   | 47.6062   | 0.0521  | 0.310955 |
| <i>Dnah17</i>        | chr11:118021722-118129219 | 2.0959    | 1.9149    | -0.1303 | 0.219025 |
| <i>Ap4s1</i>         | chr12:51690965-51738939   | 21.0194   | 18.5996   | -0.1765 | 0.303518 |
| <i>Akr1c12</i>       | chr13:4268171-4279433     | 1.3277    | 1.6293    | 0.2953  | 0.164863 |
| <i>Nedd9</i>         | chr13:41309915-41487320   | 57.5477   | 59.9449   | 0.0589  | 0.323883 |
| <i>Gm26877</i>       | chr13:41359970-41370908   | 3.2186    | 4.0884    | 0.3451  | 0.422464 |
| <i>Ell2</i>          | chr13:75707483-75772356   | 0.1964    | 0.2857    | 0.5405  | 0.437430 |
| <i>Gm20671</i>       | chr5:32737229-32827109    | 25.2676   | 26.7233   | 0.0808  | 0.316853 |
| <i>Polr2b</i>        | chr5:77310146-77349324    | 44.0108   | 40.6787   | -0.1136 | 0.220975 |
| <i>Tmem116</i>       | chr5:121451892-121524183  | 2.5105    | 2.2050    | -0.1872 | 0.139667 |
| <i>Dedd2</i>         | chr7:25202839-25219859    | 39.0694   | 35.7906   | -0.1265 | 0.254431 |
| <i>Aen</i>           | chr7:78895853-78911209    | 8.9223    | 8.2650    | -0.1104 | 0.103231 |
| <i>Plekha1</i>       | chr7:130865755-130913312  | 11.7184   | 12.2793   | 0.0675  | 0.340091 |
| <i>Nap114</i>        | chr7:143513578-143549090  | 96.8767   | 89.9924   | -0.1063 | 0.165590 |
| <i>Fbxo25</i>        | chr8:13907805-13940521    | 11.6984   | 10.6348   | -0.1375 | 0.120068 |
| <i>Jph3</i>          | chr8:121729622-121794276  | 0.3944    | 0.3077    | -0.3578 | 0.048150 |
| <i>9530077C05Rik</i> | chr9:22411576-22444677    | 0.6783    | 0.8539    | 0.3320  | 0.207109 |
| <i>Gm5617</i>        | chr9:48495344-48495964    | 9.1646    | 7.6749    | -0.2559 | 0.287173 |

|                      |                           |          |         |         |          |
|----------------------|---------------------------|----------|---------|---------|----------|
| <i>Map4</i>          | chr9:109931457-110083947  | 9.2585   | 9.7300  | 0.0717  | 0.436771 |
| <i>Traj5</i>         | chr14:54213776-54213838   | 20.9476  | 27.8301 | 0.4099  | 0.341289 |
| <i>Rnaseh2b</i>      | chr14:62292588-62372992   | 4.8423   | 5.2154  | 0.1071  | 0.422632 |
| <i>Ppp2r1a</i>       | chr17:20945310-20965916   | 40.3269  | 37.7781 | -0.0942 | 0.133629 |
| <i>1110038B12Rik</i> | chr17:34950237-34952471   | 9.5677   | 10.2091 | 0.0936  | 0.104423 |
| <i>Gtf2h4</i>        | chr17:35667729-35673739   | 3.9145   | 4.3264  | 0.1443  | 0.361087 |
| <i>Tbc1d23</i>       | chr16:57168865-57231466   | 15.6481  | 16.3323 | 0.0617  | 0.167516 |
| <i>Cldn25</i>        | chr16:58727909-58734251   | 7.8125   | 8.5626  | 0.1323  | 0.463146 |
| <i>Brms1</i>         | chr19:5041403-5049917     | 25.8437  | 28.2442 | 0.1281  | 0.446213 |
| <i>Scyl1</i>         | chr19:5758426-5771401     | 24.5300  | 25.8326 | 0.0746  | 0.357896 |
| <i>Arhgef4</i>       | chr1:34678187-34813309    | 3.8009   | 3.4893  | -0.1234 | 0.179070 |
| <i>B3galt2</i>       | chr1:143640663-143650406  | 1.4435   | 1.6981  | 0.2344  | 0.521798 |
| <i>NA</i>            | chr1:178256102-178257295  | 0.6337   | 0.8588  | 0.4386  | 0.146836 |
| <i>Sqrdl</i>         | chr2:122765236-122809569  | 0.9460   | 1.1220  | 0.2462  | 0.322643 |
| <i>Ddrbk1</i>        | chr2:130653959-130664659  | 33.5220  | 35.8202 | 0.0957  | 0.444954 |
| <i>Naa15</i>         | chr3:51416015-51475985    | 19.6733  | 21.2484 | 0.1111  | 0.526875 |
| <i>Rab33b</i>        | chr3:51483965-51495905    | 13.0898  | 13.8755 | 0.0841  | 0.275473 |
| <i>Pmf1</i>          | chr3:88394142-88410316    | 13.5335  | 14.8766 | 0.1365  | 0.347587 |
| <i>Hs2st1</i>        | chr3:144431102-144570181  | 5.5685   | 5.0684  | -0.1358 | 0.209815 |
| <i>170006J05Rik</i>  | chr4:53562982-53564697    | 0.9388   | 0.6744  | -0.4772 | 0.053356 |
| <i>Zfp691</i>        | chr4:119169512-119174195  | 2.0816   | 2.4087  | 0.2105  | 0.397804 |
| <i>Gm14005</i>       | chr2:128195992-128429349  | 0.3166   | 0.4482  | 0.5014  | 0.326281 |
| <i>Shcbp1l</i>       | chr1:153425161-153452574  | 0.2363   | 0.3161  | 0.4196  | 0.189081 |
| <i>NA</i>            | chr4:6445037-6447912      | 2.5814   | 2.9423  | 0.1888  | 0.434871 |
| <i>Tada2b</i>        | chr5:36473669-36484285    | 10.1658  | 9.4189  | -0.1101 | 0.021489 |
| <i>Bend3</i>         | chr10:43479139-43515396   | 2.3313   | 2.0405  | -0.1922 | 0.320797 |
| <i>Gm15344</i>       | chr10:86692118-86693095   | 49.9290  | 44.2933 | -0.1728 | 0.298526 |
| <i>Usp15</i>         | chr10:123113243-123196935 | 48.0912  | 50.7454 | 0.0775  | 0.385327 |
| <i>Vps54</i>         | chr11:21239280-21321136   | 23.5698  | 24.8602 | 0.0769  | 0.462014 |
| <i>Gemin5</i>        | chr11:58120001-58168539   | 11.7751  | 10.9511 | -0.1047 | 0.144186 |
| <i>Cox10</i>         | chr11:63962626-64079468   | 8.6016   | 9.1284  | 0.0858  | 0.250246 |
| <i>Ntn1</i>          | chr11:68209363-68400823   | 0.3774   | 0.4698  | 0.3157  | 0.410987 |
| <i>Gps2</i>          | chr11:69913887-69916591   | 42.9746  | 46.1565 | 0.1031  | 0.450282 |
| <i>Igfbp4</i>        | chr11:99041243-99054392   | 54.7595  | 49.5253 | -0.1449 | 0.361819 |
| <i>Nup85</i>         | chr11:115564433-115583985 | 20.3457  | 18.9174 | -0.1050 | 0.128291 |
| <i>Coq6</i>          | chr12:84361656-84373796   | 6.8166   | 6.1239  | -0.1546 | 0.236522 |
| <i>Mir1896</i>       | chr13:21445159-21445240   | 111.3540 | 94.8161 | -0.2319 | 0.394534 |
| <i>Dtnbp1</i>        | chr13:44922078-45002096   | 11.3498  | 12.2432 | 0.1093  | 0.260383 |
| <i>Ice1</i>          | chr13:70588688-70637634   | 27.8645  | 26.0152 | -0.0991 | 0.216917 |
| <i>Zbed3</i>         | chr13:95325236-95337841   | 0.5795   | 0.7689  | 0.4079  | 0.335664 |
| <i>Cenpa</i>         | chr5:30666776-30674827    | 7.0178   | 6.2477  | -0.1677 | 0.297560 |
| <i>NA</i>            | chr5:36796227-36797729    | 8.3974   | 7.2249  | -0.2170 | 0.346737 |
| <i>Nfxl1</i>         | chr5:72513300-72559684    | 2.2718   | 2.0099  | -0.1767 | 0.200798 |
| <i>Fip1l1</i>        | chr5:74535448-74598790    | 17.7362  | 18.4792 | 0.0592  | 0.381098 |
| <i>Trip6</i>         | chr5:137309898-137314241  | 2.3091   | 1.9118  | -0.2724 | 0.221003 |
| <i>Lrch4</i>         | chr5:137629120-137641099  | 31.5843  | 29.0139 | -0.1225 | 0.272901 |
| <i>Trbv31</i>        | chr6:41557690-41558371    | 29.4408  | 25.6474 | -0.1990 | 0.273406 |
| <i>C87436</i>        | chr6:86438373-86473500    | 12.4636  | 11.5204 | -0.1135 | 0.107717 |
| <i>Rps25-ps1</i>     | chr6:145266326-145266825  | 10.2955  | 8.3932  | -0.2947 | 0.383196 |
| <i>Ppfibp1</i>       | chr6:146888486-147032025  | 0.5965   | 0.6686  | 0.1646  | 0.254396 |
| <i>Gm23368</i>       | chr7:30100839-30100935    | 6.4710   | 9.2080  | 0.5089  | 0.278115 |
| <i>Arhgap33</i>      | chr7:30522225-30534180    | 0.1483   | 0.2067  | 0.4791  | 0.264781 |
| <i>Mphosph10</i>     | chr7:64376575-64392268    | 28.4148  | 30.2427 | 0.0899  | 0.417297 |
| <i>Wee1</i>          | chr7:110122349-110142112  | 1.6657   | 2.0138  | 0.2738  | 0.412383 |
| <i>Xylt1</i>         | chr7:117380978-117667751  | 1.2447   | 1.4585  | 0.2287  | 0.435957 |
| <i>Itpril2</i>       | chr7:118485113-118491975  | 0.5051   | 0.6337  | 0.3272  | 0.472393 |
| <i>Gm9967</i>        | chr7:126774964-126776818  | 2.4077   | 2.0107  | -0.2600 | 0.221025 |
| <i>Prrt2</i>         | chr7:127016770-127021211  | 2.2555   | 1.9684  | -0.1965 | 0.159200 |
| <i>Fbxl19</i>        | chr7:127746774-127768927  | 2.6573   | 3.0226  | 0.1858  | 0.436201 |
| <i>Adam8</i>         | chr7:139978931-139992562  | 0.5293   | 0.6485  | 0.2929  | 0.419647 |
| <i>Deaf1</i>         | chr7:141297175-141327725  | 7.1759   | 6.4086  | -0.1632 | 0.260017 |
| <i>Dus2</i>          | chr8:105991336-106053840  | 6.3474   | 6.7976  | 0.0989  | 0.290178 |
| <i>Sntb2</i>         | chr8:106935749-107014192  | 10.6975  | 9.6890  | -0.1429 | 0.333755 |
| <i>Mlycd</i>         | chr8:119394877-119411102  | 6.9226   | 6.1938  | -0.1605 | 0.265273 |
| <i>Cdkn2d</i>        | chr9:21288462-21291209    | 46.1906  | 49.6354 | 0.1038  | 0.429312 |
| <i>C2cd2l</i>        | chr9:44309236-44320282    | 4.7941   | 4.3643  | -0.1355 | 0.149956 |
| <i>Gm15563</i>       | chr9:66572000-66582059    | 9.3837   | 11.0376 | 0.2342  | 0.411558 |
| <i>NA</i>            | chr9:106883984-106887000  | 26.3875  | 27.9918 | 0.0851  | 0.431116 |
| <i>1700102P08Rik</i> | chr9:108392833-108397763  | 2.6388   | 2.1135  | -0.3203 | 0.294217 |
| <i>Lancl3</i>        | chrX:9199901-9268085      | 0.4026   | 0.5216  | 0.3736  | 0.369044 |
| <i>Med14</i>         | chrX:12675368-12762073    | 13.6103  | 14.2263 | 0.0639  | 0.398336 |



|                      |                           |          |          |         |          |
|----------------------|---------------------------|----------|----------|---------|----------|
| <i>Pfkfb1</i>        | chrX:150588228-150643878  | 0.9621   | 1.1096   | 0.2057  | 0.231397 |
| <i>Atad2</i>         | chr15:58094046-58135082   | 27.5540  | 28.5726  | 0.0524  | 0.299690 |
| <i>Fam83f</i>        | chr15:80671846-80700420   | 2.6583   | 2.2971   | -0.2106 | 0.248673 |
| <i>Chadl</i>         | chr15:81678295-81697287   | 2.4125   | 2.6242   | 0.1214  | 0.206355 |
| <i>Arfgap3</i>       | chr15:83299739-83350247   | 3.8466   | 3.3629   | -0.1939 | 0.254785 |
| <i>Rpap3</i>         | chr15:97675104-97705822   | 13.2712  | 14.0109  | 0.0783  | 0.210822 |
| <i>C330013E15Rik</i> | chr15:100614139-100615110 | 1.2898   | 1.7411   | 0.4329  | 0.313296 |
| <i>Ncoa4</i>         | chr14:32159864-32179855   | 3.2426   | 3.6056   | 0.1531  | 0.391944 |
| <i>Zfp219</i>        | chr14:52006076-52020733   | 3.3122   | 2.8785   | -0.2025 | 0.305661 |
| <i>Ndfip2</i>        | chr14:105258572-105309298 | 4.4540   | 4.1272   | -0.1099 | 0.120347 |
| <i>Cldn10</i>        | chr14:118787870-118875489 | 1.5793   | 1.8286   | 0.2114  | 0.360772 |
| <i>NA</i>            | chr17:21966174-21968272   | 3.7169   | 4.1220   | 0.1493  | 0.221957 |
| <i>Caskin1</i>       | chr17:24488782-24508905   | 0.5011   | 0.4161   | -0.2682 | 0.034696 |
| <i>Hagh</i>          | chr17:24840142-24864450   | 8.4293   | 7.5992   | -0.1496 | 0.112289 |
| <i>Cul7</i>          | chr17:46650336-46664364   | 1.6884   | 1.4929   | -0.1776 | 0.263429 |
| <i>Ndufaf7</i>       | chr17:78937134-78948052   | 8.4120   | 7.5501   | -0.1560 | 0.212852 |
| <i>Crebbp</i>        | chr16:4084047-4213404     | 21.8392  | 23.6992  | 0.1179  | 0.527844 |
| <i>Tfap4</i>         | chr16:4544660-4559720     | 10.8274  | 11.7174  | 0.1140  | 0.386786 |
| <i>Rrn3</i>          | chr16:13780698-13814840   | 35.9314  | 37.3127  | 0.0544  | 0.295125 |
| <i>Thap7</i>         | chr16:17527981-17531136   | 18.4770  | 19.6842  | 0.0913  | 0.364494 |
| <i>Gm15317</i>       | chr16:96145475-96147584   | 1.4648   | 0.9977   | -0.5540 | 0.284891 |
| <i>Rad9a</i>         | chr19:4195197-4201603     | 53.5033  | 50.1523  | -0.0933 | 0.056135 |
| <i>Ssca1</i>         | chr19:5728087-5731732     | 16.9213  | 18.0669  | 0.0945  | 0.421041 |
| <i>Polr2g</i>        | chr19:8793128-8798557     | 59.2146  | 53.5172  | -0.1459 | 0.292461 |
| <i>Tle4</i>          | chr19:14448071-14598051   | 30.0131  | 31.1018  | 0.0514  | 0.257810 |
| <i>Smndc1</i>        | chr19:53379213-53390573   | 14.4134  | 15.4614  | 0.1013  | 0.405987 |
| <i>Agfg1</i>         | chr1:82839482-82896275    | 73.0930  | 75.9010  | 0.0544  | 0.299311 |
| <i>2410004N09Rik</i> | chr18:33794891-33795986   | 45.9526  | 50.6201  | 0.1396  | 0.393953 |
| <i>Fam107b</i>       | chr2:3613757-3782142      | 181.1020 | 189.0535 | 0.0620  | 0.353753 |
| <i>Sdcccag3</i>      | chr2:26382801-26389316    | 41.8662  | 39.2921  | -0.0915 | 0.120965 |
| <i>Arhgap15</i>      | chr2:43748823-44395953    | 46.5236  | 48.5794  | 0.0624  | 0.394302 |
| <i>Pdpx</i>          | chr2:103021074-103073513  | 5.4439   | 5.8050   | 0.0926  | 0.288482 |
| <i>BC046401</i>      | chr2:165857683-165859034  | 1.3469   | 0.9738   | -0.4679 | 0.203879 |
| <i>Fam209</i>        | chr2:172472519-172474331  | 2.9003   | 3.4766   | 0.2615  | 0.144454 |
| <i>4933429H19Rik</i> | chr3:30793137-30793560    | 3.9906   | 2.8874   | -0.4668 | 0.301352 |
| <i>Mir16-2</i>       | chr3:69009901-69009996    | 11.7120  | 8.1799   | -0.5178 | 0.302891 |
| <i>Pear1</i>         | chr3:87747889-87824306    | 1.6319   | 1.8901   | 0.2119  | 0.477775 |
| <i>Pias3</i>         | chr3:96696383-96706070    | 2.9363   | 2.5306   | -0.2145 | 0.351758 |
| <i>Lef1</i>          | chr3:131110470-131224356  | 61.7287  | 65.8622  | 0.0935  | 0.492630 |
| <i>Rap1gds1</i>      | chr3:138925905-139075199  | 29.7505  | 27.4353  | -0.1169 | 0.240522 |
| <i>Gba2</i>          | chr4:43566927-43578873    | 16.7067  | 15.4834  | -0.1097 | 0.188747 |
| <i>Melk</i>          | chr4:44300875-44364675    | 0.8830   | 1.0609   | 0.2648  | 0.331677 |
| <i>Gm16731</i>       | chr4:46535900-46539802    | 6.3217   | 5.4151   | -0.2233 | 0.218153 |
| <i>Inpp5b</i>        | chr4:124741849-124801511  | 34.4151  | 32.2632  | -0.0932 | 0.062553 |
| <i>Fbxo6</i>         | chr4:148145715-148152140  | 5.5233   | 6.0649   | 0.1350  | 0.335453 |
| <i>Prdm16</i>        | chr4:154316124-154636873  | 0.1326   | 0.0480   | -1.4656 | 0.315641 |
| <i>Slc25a45</i>      | chr19:5877807-5885766     | 22.2335  | 20.6193  | -0.1087 | 0.153619 |
| <i>NA</i>            | chr10:79540245-79541960   | 10.7962  | 11.6865  | 0.1143  | 0.334207 |
| <i>Nme2</i>          | chr11:93949813-93956259   | 57.4880  | 50.6150  | -0.1837 | 0.389281 |
| <i>Bsn</i>           | chr9:108096022-108190384  | 0.5498   | 0.4545   | -0.2746 | 0.390283 |
| <i>Rora</i>          | chr9:68653785-69388246    | 1.4296   | 1.5391   | 0.1066  | 0.370936 |
| <i>Traf5</i>         | chr1:191997429-192092559  | 18.3183  | 16.5534  | -0.1462 | 0.302995 |
| <i>Gbp9</i>          | chr5:105078393-105139539  | 91.9835  | 97.3357  | 0.0816  | 0.468633 |
| <i>Txn14b</i>        | chr8:109565891-109574051  | 6.0518   | 6.7587   | 0.1594  | 0.402237 |
| <i>Gm10698</i>       | chr9:33728212-33728889    | 2.6102   | 2.0249   | -0.3663 | 0.153501 |
| <i>Polr2k</i>        | chr15:36174009-36177010   | 1.7183   | 2.2283   | 0.3750  | 0.209119 |
| <i>Pdxb</i>          | chr14:8165990-8172992     | 37.7019  | 39.3066  | 0.0601  | 0.117221 |
| <i>NA</i>            | chr17:27565111-27566220   | 3.0914   | 2.4748   | -0.3210 | 0.318739 |
| <i>Zbtb20</i>        | chr16:42875880-43642602   | 2.7987   | 3.0964   | 0.1458  | 0.563497 |
| <i>Mrps6</i>         | chr16:92058269-92112227   | 7.5645   | 8.2371   | 0.1229  | 0.299702 |
| <i>Rasgrp2</i>       | chr19:6399339-6415216     | 29.9040  | 28.2933  | -0.0799 | 0.025482 |
| <i>Ssr2</i>          | chr3:88579670-88588397    | 50.5306  | 53.2342  | 0.0752  | 0.379162 |
| <i>1700055D18Rik</i> | chr4:45012829-45014399    | 1.3188   | 1.5749   | 0.2560  | 0.085968 |
| <i>Egr2</i>          | chr10:67535474-67542188   | 7.2856   | 7.8134   | 0.1009  | 0.375267 |
| <i>Vti1b</i>         | chr12:79156016-79172667   | 35.1965  | 37.5312  | 0.0927  | 0.398493 |
| <i>Hipk1</i>         | chr3:103739814-103791563  | 59.9558  | 63.9695  | 0.0935  | 0.510470 |
| <i>Yipf1</i>         | chr4:107314362-107359823  | 5.3320   | 4.8874   | -0.1256 | 0.193659 |
| <i>Gm7418</i>        | chr8:94835716-94836517    | 2.2004   | 1.6617   | -0.4051 | 0.240862 |
| <i>NA</i>            | chr9:73008480-73015657    | 11.6988  | 10.5697  | -0.1464 | 0.307671 |
| <i>Ppp2r5d</i>       | chr17:46682990-46705002   | 23.3510  | 24.8914  | 0.0922  | 0.447483 |
| <i>Tjp3</i>          | chr10:81273206-81291267   | 2.3652   | 2.0196   | -0.2279 | 0.291614 |

|                      |                           |          |          |         |          |
|----------------------|---------------------------|----------|----------|---------|----------|
| <i>Hmg20b</i>        | chr10:81346047-81350480   | 5.7149   | 5.1674   | -0.1453 | 0.202031 |
| <i>Gna11</i>         | chr10:81528723-81545190   | 7.4907   | 6.8861   | -0.1214 | 0.168131 |
| <i>A230046K03Rik</i> | chr10:83543940-83596469   | 39.7658  | 36.9804  | -0.1048 | 0.218683 |
| <i>Gpr182</i>        | chr10:127747275-127751732 | 0.5291   | 0.6599   | 0.3186  | 0.409500 |
| <i>Gm11400</i>       | chr11:3149741-3150955     | 6.8424   | 7.6085   | 0.1531  | 0.381992 |
| <i>Gm12103</i>       | chr11:30822241-30822670   | 1.7583   | 2.4056   | 0.4522  | 0.275825 |
| <i>Ifj47</i>         | chr11:49076586-49096974   | 146.2999 | 132.5749 | -0.1421 | 0.353945 |
| <i>Maml1</i>         | chr11:50255633-50292311   | 6.8953   | 7.3649   | 0.0951  | 0.452058 |
| <i>Gm25082</i>       | chr11:51270434-51270689   | 30.3913  | 25.8309  | -0.2346 | 0.309554 |
| <i>Lrrc48</i>        | chr11:60353328-60394341   | 0.3546   | 0.2725   | -0.3797 | 0.151711 |
| <i>Gabarap</i>       | chr11:69991142-69994951   | 65.9552  | 71.2677  | 0.1118  | 0.474997 |
| <i>Pelp1</i>         | chr11:70392882-70410031   | 6.0387   | 5.4309   | -0.1530 | 0.292777 |
| <i>5730455P16Rik</i> | chr11:80360491-80378034   | 5.8549   | 6.2210   | 0.0875  | 0.364357 |
| <i>Acaca</i>         | chr11:84129671-84401651   | 3.8753   | 3.5312   | -0.1341 | 0.267103 |
| <i>Gm20390</i>       | chr11:93949818-93968293   | 105.0795 | 93.4954  | -0.1685 | 0.380559 |
| <i>Nr1d1</i>         | chr11:98767931-98775333   | 0.7714   | 0.9557   | 0.3092  | 0.425958 |
| <i>Mettl2</i>        | chr11:105126424-105140394 | 12.2856  | 11.3809  | -0.1104 | 0.069904 |
| <i>Gm11707</i>       | chr11:106972057-106973090 | 12.9989  | 10.4539  | -0.3143 | 0.377312 |
| <i>E2f6</i>          | chr12:16810964-16826743   | 7.3128   | 6.6340   | -0.1405 | 0.116600 |
| <i>Lin52</i>         | chr12:84451507-84531533   | 4.6055   | 4.0640   | -0.1805 | 0.168015 |
| <i>Zfp369</i>        | chr13:65278813-65304221   | 11.9686  | 11.1280  | -0.1051 | 0.182529 |
| <i>4833422C13Rik</i> | chr13:91701664-91741872   | 1.8350   | 2.0203   | 0.1388  | 0.407057 |
| <i>Gm26943</i>       | chr13:112884225-112885182 | 1.6334   | 1.2585   | -0.3762 | 0.129758 |
| <i>B430218F22Rik</i> | chr13:118386629-118388124 | 7.4754   | 8.4603   | 0.1786  | 0.452804 |
| <i>Tmem128</i>       | chr5:38260184-38269622    | 25.5236  | 23.4199  | -0.1241 | 0.216154 |
| <i>Bod1l</i>         | chr5:4187541-41844168     | 35.7901  | 36.9275  | 0.0451  | 0.203146 |
| <i>Rpl5</i>          | chr5:107900501-107909005  | 24.6719  | 25.9585  | 0.0733  | 0.357859 |
| <i>Abhd11os</i>      | chr5:135012113-135013253  | 4.1059   | 3.3744   | -0.2831 | 0.119847 |
| <i>Gm26938</i>       | chr5:139807977-139826407  | 5.5692   | 4.6413   | -0.2629 | 0.200686 |
| <i>Mios</i>          | chr6:8209221-8236274      | 9.9153   | 9.1379   | -0.1178 | 0.203013 |
| <i>Tmem106b</i>      | chr6:13069758-13089269    | 22.5905  | 23.4327  | 0.0528  | 0.313206 |
| <i>Ndufa5</i>        | chr6:24518665-24528013    | 23.1641  | 26.4042  | 0.1889  | 0.499706 |
| <i>Podxl</i>         | chr6:31519487-31563981    | 0.5779   | 0.4741   | -0.2856 | 0.186107 |
| <i>Ubn2</i>          | chr6:38433949-38524825    | 6.7466   | 7.2969   | 0.1131  | 0.550824 |
| <i>Gimap1</i>        | chr6:48718606-48752600    | 80.5656  | 74.5105  | -0.1127 | 0.232808 |
| <i>Vhl</i>           | chr6:113623958-113631633  | 12.2365  | 11.2316  | -0.1236 | 0.162245 |
| <i>Hnrnpf</i>        | chr6:117900323-117925622  | 26.3939  | 24.2536  | -0.1220 | 0.252336 |
| <i>Gm26826</i>       | chr6:122813625-122820614  | 2.7097   | 2.2568   | -0.2639 | 0.234586 |
| <i>Tapbp1</i>        | chr6:125223932-125231860  | 54.1614  | 50.1288  | -0.1116 | 0.263755 |
| <i>Ergic2</i>        | chr6:148179078-148212374  | 13.3686  | 14.0253  | 0.0692  | 0.365396 |
| <i>Leng9</i>         | chr7:4148182-4149872      | 7.3848   | 8.2467   | 0.1592  | 0.457581 |
| <i>Rpl18</i>         | chr7:45715456-45720835    | 63.4651  | 56.3817  | -0.1707 | 0.395396 |
| <i>Arrb1</i>         | chr7:99535465-99606771    | 10.0027  | 9.2588   | -0.1115 | 0.267016 |
| <i>Atg16l2</i>       | chr7:101289391-101302251  | 13.4432  | 12.2428  | -0.1349 | 0.290497 |
| <i>Nucb2</i>         | chr7:116504368-116540554  | 3.6320   | 4.0697   | 0.1642  | 0.403088 |
| <i>Prr14</i>         | chr7:127459610-127476759  | 14.6733  | 15.6961  | 0.0972  | 0.453452 |
| <i>Fus</i>           | chr7:127967456-127982368  | 13.3846  | 14.4824  | 0.1137  | 0.524160 |
| <i>Bnip3</i>         | chr7:138890835-138909519  | 0.7872   | 0.9590   | 0.2848  | 0.216699 |
| <i>Fadd</i>          | chr7:144577317-144582463  | 3.9105   | 4.2072   | 0.1055  | 0.265170 |
| <i>Arhgef18</i>      | chr8:3393005-3456601      | 65.8261  | 61.3573  | -0.1014 | 0.257944 |
| <i>Stxbp2</i>        | chr8:3630954-3643644      | 25.8419  | 27.0377  | 0.0653  | 0.427965 |
| <i>Pgpep1</i>        | chr8:70646435-70659738    | 1.3716   | 1.1598   | -0.2419 | 0.282884 |
| <i>Ccdc124</i>       | chr8:70868226-70873490    | 30.9967  | 34.1204  | 0.1385  | 0.485171 |
| <i>Dnaja2</i>        | chr8:85537639-85555271    | 67.8540  | 72.4069  | 0.0937  | 0.442356 |
| <i>Rltpr</i>         | chr8:105690905-105698178  | 18.4827  | 16.6289  | -0.1525 | 0.367187 |
| <i>Glg1</i>          | chr8:111154420-111259216  | 27.4838  | 25.3633  | -0.1158 | 0.301926 |
| <i>4933417D19Rik</i> | chr8:123235090-123242359  | 1.9285   | 1.5510   | -0.3142 | 0.160465 |
| <i>Msantd2</i>       | chr9:37489320-37524148    | 13.1868  | 12.0806  | -0.1264 | 0.185683 |
| <i>Thy1</i>          | chr9:44043383-44048579    | 294.8132 | 316.6010 | 0.1029  | 0.503065 |
| <i>Dpagt1</i>        | chr9:44326844-44333600    | 5.7160   | 6.1940   | 0.1159  | 0.179599 |
| <i>Sema7a</i>        | chr9:57940112-57962864    | 0.6780   | 0.8337   | 0.2982  | 0.419529 |
| <i>Vwa9</i>          | chr9:64960831-64986974    | 15.4609  | 16.1334  | 0.0614  | 0.186297 |
| <i>Ccpg1os</i>       | chr9:72979723-72985376    | 5.5355   | 6.5300   | 0.2384  | 0.337938 |
| <i>5830418P13Rik</i> | chr9:103423577-103461255  | 0.4378   | 0.5649   | 0.3678  | 0.212830 |
| <i>Rassf1</i>        | chr9:107551554-107562263  | 14.3399  | 13.3877  | -0.0991 | 0.099122 |
| <i>Csrnp1</i>        | chr9:119971165-119977250  | 10.0758  | 9.2447   | -0.1242 | 0.162391 |
| <i>Ubqln2</i>        | chrX:153498231-153501537  | 3.4664   | 3.9065   | 0.1725  | 0.481093 |
| <i>Gm1720</i>        | chrX:166662024-166689812  | 1.7419   | 1.4162   | -0.2986 | 0.139207 |
| <i>Mroh1</i>         | chr15:76380260-76453038   | 3.6816   | 3.3943   | -0.1172 | 0.256494 |
| <i>Npcd</i>          | chr15:79789674-79834237   | 3.9059   | 3.3116   | -0.2382 | 0.275877 |
| <i>Ndufa6</i>        | chr15:82350138-82354291   | 144.5147 | 157.6254 | 0.1253  | 0.483579 |

|                      |                           |          |          |         |          |
|----------------------|---------------------------|----------|----------|---------|----------|
| <i>C230037L18Rik</i> | chr15:89476235-89484847   | 1.9906   | 1.6732   | -0.2506 | 0.210828 |
| <i>Rpl39-ps</i>      | chr15:102634981-102635336 | 7.1960   | 5.7294   | -0.3288 | 0.293397 |
| <i>Atp5g2</i>        | chr15:102663013-102667749 | 2.8615   | 2.1053   | -0.4428 | 0.173938 |
| <i>Sec24c</i>        | chr14:20674320-20694850   | 50.9828  | 47.6494  | -0.0976 | 0.222244 |
| <i>Comtd1</i>        | chr14:21845860-21848977   | 7.0859   | 6.3776   | -0.1519 | 0.216808 |
| <i>Ankrd28</i>       | chr14:31700014-31830415   | 11.1125  | 11.7850  | 0.0848  | 0.473802 |
| <i>Tulp4</i>         | chr17:6106436-6251128     | 3.4822   | 3.6569   | 0.0706  | 0.291720 |
| <i>Gm26694</i>       | chr17:25794893-25964784   | 8.7537   | 7.8656   | -0.1543 | 0.230960 |
| <i>Tbc1d22bos</i>    | chr17:29578815-29596305   | 3.9833   | 3.4634   | -0.2018 | 0.234425 |
| <i>Akap8l</i>        | chr17:32321424-32350581   | 57.2802  | 53.6704  | -0.0939 | 0.119601 |
| <i>Ppp1r11</i>       | chr17:36948355-36951741   | 27.0927  | 29.0717  | 0.1017  | 0.448233 |
| <i>Znrd1</i>         | chr17:36954357-36958559   | 36.7616  | 33.2234  | -0.1460 | 0.243283 |
| <i>4930565N06Rik</i> | chr16:36880518-36897189   | 2.2557   | 1.9326   | -0.2230 | 0.181731 |
| <i>Mus81</i>         | chr19:5482344-5488402     | 12.7878  | 11.6158  | -0.1387 | 0.289025 |
| <i>Atg2a</i>         | chr19:6241667-6262335     | 9.8648   | 8.7942   | -0.1657 | 0.411775 |
| <i>Tmem109</i>       | chr19:10870659-10882001   | 5.3728   | 4.8829   | -0.1379 | 0.165783 |
| <i>Bend6</i>         | chr1:33852051-33907816    | 0.4332   | 0.5544   | 0.3557  | 0.362237 |
| <i>Gm15834</i>       | chr1:58505147-58523230    | 1.3541   | 1.5384   | 0.1841  | 0.406699 |
| <i>Rab3gap1</i>      | chr1:127868772-127943868  | 24.2878  | 22.8625  | -0.0872 | 0.042273 |
| <i>Pou2f1</i>        | chr1:165865153-166002678  | 8.6259   | 9.1996   | 0.0929  | 0.511074 |
| <i>Usp21</i>         | chr1:171281944-171287991  | 5.1830   | 5.5013   | 0.0860  | 0.285652 |
| <i>Ik</i>            | chr18:36744655-36757639   | 89.1913  | 95.2520  | 0.0948  | 0.464988 |
| <i>Gnpda1</i>        | chr18:38327557-38339003   | 6.4660   | 7.0762   | 0.1301  | 0.395410 |
| <i>Cd226</i>         | chr18:89197430-89270201   | 115.6921 | 104.8891 | -0.1414 | 0.350982 |
| <i>Man1b1</i>        | chr2:25332337-25352212    | 14.6280  | 13.5822  | -0.1070 | 0.196085 |
| <i>Exosc2</i>        | chr2:31670714-31681350    | 23.8495  | 21.9787  | -0.1179 | 0.166491 |
| <i>Gm26558</i>       | chr2:70661247-70662108    | 4.1638   | 4.8615   | 0.2235  | 0.289232 |
| <i>Rbm45</i>         | chr2:76369983-76383768    | 45.7873  | 42.7231  | -0.0999 | 0.089868 |
| <i>Gm10762</i>       | chr2:128966592-128967725  | 8.3584   | 7.3452   | -0.1864 | 0.223730 |
| <i>0610039K10Rik</i> | chr2:163644849-163645800  | 3.0882   | 2.5211   | -0.2927 | 0.190903 |
| <i>Pcmt2</i>         | chr2:181837853-181857461  | 37.7708  | 35.5305  | -0.0882 | 0.045772 |
| <i>Armc1</i>         | chr3:19132145-19163065    | 14.6498  | 13.4340  | -0.1250 | 0.200579 |
| <i>Mtfr1</i>         | chr3:19187326-19220817    | 12.8450  | 13.3968  | 0.0607  | 0.213529 |
| <i>Tsc22d2</i>       | chr3:58415688-58466787    | 6.9009   | 6.3725   | -0.1149 | 0.250172 |
| <i>Smc4</i>          | chr3:69004737-69034623    | 226.9471 | 237.2383 | 0.0640  | 0.393980 |
| <i>Il6ra</i>         | chr3:89869323-89913162    | 41.8375  | 44.4646  | 0.0879  | 0.487820 |
| <i>Ilf2</i>          | chr3:90476200-90488379    | 50.3288  | 52.2389  | 0.0537  | 0.242994 |
| <i>Gm5070</i>        | chr3:95410345-95411176    | 1.0343   | 0.7010   | -0.5612 | 0.263643 |
| <i>Msh4</i>          | chr3:153857146-153906138  | 0.3724   | 0.2755   | -0.4345 | 0.240503 |
| <i>Gm25692</i>       | chr4:45396993-45397118    | 10.7282  | 7.9628   | -0.4301 | 0.232299 |
| <i>Gm12785</i>       | chr4:101210415-101210587  | 7.0678   | 4.9291   | -0.5199 | 0.346968 |
| <i>Pars2</i>         | chr4:106651068-106655282  | 6.0961   | 5.5549   | -0.1341 | 0.074845 |
| <i>Man1c1</i>        | chr4:134561689-134704290  | 0.5227   | 0.4166   | -0.3274 | 0.341629 |
| <i>Samd11</i>        | chr4:156246972-156255338  | 14.8988  | 15.9118  | 0.0949  | 0.422796 |
| <i>Snord89</i>       | chr1:39548744-39548854    | 7.9705   | 5.3221   | -0.5827 | 0.248984 |
| <i>Csf1</i>          | chr3:107741047-107760469  | 0.1146   | 0.1666   | 0.5408  | 0.362357 |
| <i>Commd2</i>        | chr3:57642903-57651715    | 4.6153   | 4.1426   | -0.1559 | 0.261834 |
| <i>Gm867</i>         | chr10:75937720-75940672   | 0.6671   | 0.9243   | 0.4704  | 0.328309 |
| <i>Arhgef26</i>      | chr3:62338343-62462221    | 0.4979   | 0.5833   | 0.2283  | 0.418481 |
| <i>Os9</i>           | chr10:127094258-127121160 | 57.6093  | 60.4384  | 0.0692  | 0.461894 |
| <i>Papd4</i>         | chr13:93147399-93192283   | 9.2765   | 10.1775  | 0.1337  | 0.463427 |
| <i>Pik3cb</i>        | chr9:99038401-99140621    | 2.0136   | 1.7957   | -0.1653 | 0.182562 |
| <i>F630028O10Rik</i> | chrX:96239941-96243636    | 0.2426   | 0.3608   | 0.5728  | 0.521795 |
| <i>Grap2</i>         | chr15:80623504-80650559   | 138.0667 | 127.2099 | -0.1182 | 0.272713 |
| <i>Slc23a1</i>       | chr18:35614603-35627244   | 1.2219   | 1.3946   | 0.1907  | 0.160654 |
| <i>Anxa5</i>         | chr3:36448924-36475843    | 43.8288  | 39.5235  | -0.1492 | 0.344604 |
| <i>Emc1</i>          | chr4:139352586-139378730  | 16.0758  | 14.8931  | -0.1103 | 0.270864 |
| <i>Gm26534</i>       | chr11:60879117-60887218   | 1.2437   | 1.5044   | 0.2745  | 0.307987 |
| <i>Ovca2</i>         | chr11:75175941-75178835   | 17.4639  | 18.3619  | 0.0723  | 0.309546 |
| <i>Mob3a</i>         | chr10:80685255-80701820   | 107.3482 | 99.4746  | -0.1099 | 0.221165 |
| <i>Galnt12</i>       | chr4:47091908-47123070    | 18.8578  | 17.3128  | -0.1233 | 0.212992 |
| <i>Gm17130</i>       | chr5:32005976-32010863    | 1.4466   | 1.6782   | 0.2142  | 0.373952 |
| <i>Anln</i>          | chr9:22331213-22389206    | 1.2137   | 1.4075   | 0.2137  | 0.496823 |
| <i>Gm10226</i>       | chr17:21691859-21692114   | 10.0177  | 11.7270  | 0.2273  | 0.108702 |
| <i>Zdhhc7</i>        | chr8:120081094-120101482  | 13.5385  | 12.5854  | -0.1053 | 0.110639 |
| <i>Zfp287</i>        | chr11:62700355-62731905   | 4.3044   | 4.5733   | 0.0874  | 0.411162 |
| <i>1700027A07Rik</i> | chr15:78911965-78913660   | 9.4015   | 7.8365   | -0.2627 | 0.291905 |
| <i>Kat5</i>          | chr19:5603016-5610094     | 32.5177  | 33.9830  | 0.0636  | 0.292326 |
| <i>Rilpl2</i>        | chr5:124463264-124478366  | 13.2047  | 11.7391  | -0.1697 | 0.275946 |
| <i>Sbds</i>          | chr5:130245730-130255530  | 38.9294  | 40.6812  | 0.0635  | 0.286479 |
| <i>E430025E21Rik</i> | chr15:59331997-59374167   | 15.8874  | 16.7305  | 0.0746  | 0.406351 |

|                      |                           |          |          |         |          |
|----------------------|---------------------------|----------|----------|---------|----------|
| <i>1700037C18Rik</i> | chr16:3895178-3908689     | 10.4918  | 11.1229  | 0.0843  | 0.369100 |
| <i>Atp5a1</i>        | chr18:7773728-77782869    | 229.2586 | 213.7134 | -0.1013 | 0.177568 |
| <i>Gm22275</i>       | chr11:53701178-53701488   | 5.4784   | 4.2179   | -0.3772 | 0.252718 |
| <i>Prmt7</i>         | chr8:106210935-106252794  | 7.5626   | 7.0428   | -0.1027 | 0.039497 |
| <i>Tvp23a</i>        | chr16:10420556-10447362   | 9.1615   | 8.4551   | -0.1158 | 0.114576 |
| <i>Epb4.1l5</i>      | chr1:119545032-119649000  | 0.1496   | 0.1914   | 0.3555  | 0.254176 |
| <i>Gm16933</i>       | chr8:25037051-25041757    | 21.9780  | 20.0888  | -0.1297 | 0.271613 |
| <i>Gdf11</i>         | chr10:128882294-128891718 | 4.9839   | 5.3834   | 0.1113  | 0.427238 |
| <i>NA</i>            | chr11:58327720-58330339   | 12.7336  | 11.5814  | -0.1368 | 0.266907 |
| <i>Arhgef40</i>      | chr14:51984718-52006251   | 0.0731   | 0.1005   | 0.4600  | 0.369482 |
| <i>Gm10382</i>       | chr5:125389321-125390554  | 4.0498   | 4.6496   | 0.1993  | 0.390422 |
| <i>Pcbp1</i>         | chr6:86524498-86526171    | 17.1596  | 15.6775  | -0.1303 | 0.213413 |
| <i>Mtcp1</i>         | chrX:75410443-75416588    | 11.7902  | 10.8960  | -0.1138 | 0.205400 |
| <i>4430402118Rik</i> | chr19:28901267-28967800   | 0.4511   | 0.3340   | -0.4337 | 0.276903 |
| <i>mt-Th</i>         | chrM:11545-11612          | 15.0313  | 10.5780  | -0.5069 | 0.243726 |
| <i>Rnft1</i>         | chr11:86484656-86499025   | 12.5107  | 13.2045  | 0.0779  | 0.416187 |
| <i>Supt20</i>        | chr3:54693104-54716837    | 41.8737  | 43.7653  | 0.0637  | 0.381265 |
| <i>Trim23</i>        | chr13:104178796-104203372 | 9.9290   | 10.4619  | 0.0754  | 0.369358 |
| <i>Ube3b</i>         | chr5:114380627-114421168  | 16.7679  | 15.4768  | -0.1156 | 0.281908 |
| <i>Nrg4</i>          | chr9:55220221-55326844    | 2.9309   | 2.6654   | -0.1370 | 0.115709 |
| <i>Eif3l</i>         | chr15:79075222-79094400   | 102.6657 | 107.0918 | 0.0609  | 0.355067 |
| <i>Ptpcr</i>         | chr1:138062860-138175706  | 627.5000 | 657.1306 | 0.0666  | 0.463635 |
| <i>Gm14325</i>       | chr2:177831790-177840336  | 3.6722   | 4.0768   | 0.1508  | 0.096828 |
| <i>Cct4</i>          | chr11:22990518-23003780   | 77.2900  | 71.0028  | -0.1224 | 0.305654 |
| <i>1700030C12Rik</i> | chr11:23497752-23499661   | 1.8371   | 1.4257   | -0.3658 | 0.309728 |
| <i>Rangrf</i>        | chr11:68972483-68975185   | 1.5241   | 1.9318   | 0.3420  | 0.356907 |
| <i>Cc2d2a</i>        | chr5:43662378-43740972    | 0.1377   | 0.1816   | 0.3995  | 0.281619 |
| <i>Loxl3</i>         | chr6:83034172-83052562    | 2.3590   | 2.5598   | 0.1179  | 0.139385 |
| <i>Ogg1</i>          | chr6:113326971-113335068  | 6.2249   | 5.5326   | -0.1701 | 0.218796 |
| <i>Ninj2</i>         | chr6:120093349-120200339  | 1.3521   | 0.9486   | -0.5113 | 0.272575 |
| <i>E2f8</i>          | chr7:48866428-48881596    | 0.3477   | 0.4701   | 0.4352  | 0.518113 |
| <i>Eif3c</i>         | chr7:126546454-126566411  | 97.5597  | 100.6879 | 0.0455  | 0.252039 |
| <i>Spc24</i>         | chr9:21755441-21760286    | 2.4542   | 2.9087   | 0.2451  | 0.426660 |
| <i>Rab3d</i>         | chr9:21907490-21918192    | 4.1131   | 3.5982   | -0.1929 | 0.366615 |
| <i>Smd10</i>         | chrX:140948428-140956728  | 15.0017  | 16.2228  | 0.1129  | 0.399666 |
| <i>Gnl3l</i>         | chrX:150983140-151017322  | 19.8093  | 18.5499  | -0.0948 | 0.083704 |
| <i>Gm25238</i>       | chr19:60580528-60580617   | 34.0171  | 28.0480  | -0.2784 | 0.197912 |
| <i>Tmem167b</i>      | chr3:108556424-108562466  | 23.9475  | 25.3084  | 0.0797  | 0.406805 |
| <i>Gm26004</i>       | chr1:181840452-181840568  | 12.5850  | 15.7653  | 0.3250  | 0.241667 |
| <i>Zbtb34</i>        | chr2:33406107-33431324    | 1.3428   | 1.1653   | -0.2046 | 0.339949 |
| <i>Patz1</i>         | chr11:3288873-3309083     | 15.6327  | 14.5212  | -0.1064 | 0.236763 |
| <i>Zzef1</i>         | chr11:72796225-72927120   | 18.1378  | 16.6846  | -0.1205 | 0.343052 |
| <i>Aarsd1</i>        | chr11:101406838-101417615 | 10.3270  | 9.3640   | -0.1412 | 0.223025 |
| <i>Snx25</i>         | chr8:46033260-46152159    | 11.9010  | 10.9004  | -0.1267 | 0.282018 |
| <i>Mapk8ip3</i>      | chr17:24892152-24936977   | 16.9845  | 16.0610  | -0.0807 | 0.104002 |
| <i>4833413E03Rik</i> | chr17:31557125-31559113   | 0.6368   | 0.8600   | 0.4335  | 0.355326 |
| <i>Lrrc51</i>        | chr7:101912983-101933895  | 3.8903   | 3.3261   | -0.2260 | 0.106526 |
| <i>Clcn2</i>         | chr16:20702963-20717746   | 0.6462   | 0.7338   | 0.1833  | 0.091498 |
| <i>Fos</i>           | chr12:85473889-85477273   | 3.1387   | 3.7067   | 0.2400  | 0.562074 |
| <i>Scml4</i>         | chr10:42860369-42960780   | 35.5550  | 33.5220  | -0.0849 | 0.120655 |
| <i>Bri3</i>          | chr5:144244436-144446757  | 1.9492   | 1.6262   | -0.2613 | 0.125883 |
| <i>Rpl14-ps1</i>     | chr7:45324940-45325651    | 217.6991 | 270.3339 | 0.3124  | 0.337980 |
| <i>Mapk11</i>        | chr15:89142485-89149606   | 4.2567   | 4.7601   | 0.1613  | 0.440135 |
| <i>Gm15538</i>       | chr16:3926427-3926740     | 4.1984   | 3.0612   | -0.4558 | 0.357788 |
| <i>Usp7</i>          | chr16:8689594-8792308     | 64.8881  | 61.0162  | -0.0888 | 0.158474 |
| <i>Gm4204</i>        | chr1:135232044-135233404  | 0.7440   | 1.0236   | 0.4603  | 0.394293 |
| <i>Rhbdf1</i>        | chr11:32209584-32222300   | 0.2193   | 0.1577   | -0.4764 | 0.247777 |
| <i>0610009B22Rik</i> | chr11:51685385-51688874   | 4.6498   | 3.9149   | -0.2482 | 0.250401 |
| <i>Cdc27</i>         | chr11:104502744-104550620 | 19.7024  | 20.5648  | 0.0618  | 0.344931 |
| <i>Cdkal1</i>        | chr13:29191745-29855674   | 3.6768   | 3.8663   | 0.0725  | 0.340346 |
| <i>Plekha2</i>       | chr8:25039143-25102194    | 38.3868  | 36.2807  | -0.0814 | 0.041625 |
| <i>Gsr</i>           | chr8:33652522-33698163    | 14.2621  | 15.1540  | 0.0875  | 0.390088 |
| <i>Jund</i>          | chr8:70697738-70700616    | 54.4046  | 60.2514  | 0.1473  | 0.548576 |
| <i>Mtfmt</i>         | chr9:65435781-65453054    | 7.9007   | 8.3732   | 0.0838  | 0.291788 |
| <i>Pigb</i>          | chr9:73015695-73039699    | 5.3428   | 4.7144   | -0.1805 | 0.305708 |
| <i>Dalrd3</i>        | chr9:108569891-108572771  | 39.0080  | 36.0126  | -0.1153 | 0.200362 |
| <i>Gm15835</i>       | chr16:4777742-4779454     | 2.0932   | 2.9305   | 0.4854  | 0.340505 |
| <i>Gm6136</i>        | chr1:86908761-86909703    | 1.9830   | 2.4554   | 0.3083  | 0.351939 |
| <i>Gm26910</i>       | chr18:67773711-67774857   | 6.4110   | 7.4551   | 0.2177  | 0.378584 |
| <i>Tnks</i>          | chr8:34829178-34965690    | 11.0393  | 10.1353  | -0.1233 | 0.311039 |
| <i>Gas7</i>          | chr11:67455436-67688990   | 0.4955   | 0.6936   | 0.4853  | 0.362497 |

|                      |                           |          |          |         |          |
|----------------------|---------------------------|----------|----------|---------|----------|
| <i>Irgq</i>          | chr7:24530647-24538599    | 4.3224   | 4.6083   | 0.0924  | 0.402482 |
| <i>Stard3nl</i>      | chr13:19357676-19395752   | 8.5598   | 7.5268   | -0.1855 | 0.254883 |
| <i>Limd2</i>         | chr11:106156255-106160860 | 212.6694 | 196.9780 | -0.1106 | 0.265615 |
| <i>Igj</i>           | chr5:88520511-88527891    | 0.9222   | 0.6233   | -0.5652 | 0.482601 |
| <i>Ephx1</i>         | chr1:180976154-181020904  | 40.1493  | 42.6078  | 0.0857  | 0.464412 |
| <i>Rab6b</i>         | chr9:103112073-103185270  | 4.2841   | 4.7542   | 0.1502  | 0.419274 |
| <i>Ulbp1</i>         | chr10:7444872-7473477     | 6.1211   | 5.3905   | -0.1834 | 0.308458 |
| <i>Pofut2</i>        | chr10:77259299-77269586   | 14.0291  | 12.8766  | -0.1237 | 0.215993 |
| <i>Slc43a2</i>       | chr11:75531693-75577575   | 10.7494  | 9.8365   | -0.1280 | 0.355302 |
| <i>Ypel2</i>         | chr11:86936424-86993707   | 0.8205   | 0.9796   | 0.2557  | 0.437581 |
| <i>Dynll2</i>        | chr11:87979524-87987533   | 3.2802   | 2.8567   | -0.1995 | 0.276910 |
| <i>Rhbdf2</i>        | chr11:116598164-116627019 | 2.5147   | 2.7562   | 0.1323  | 0.415256 |
| <i>Srsf2</i>         | chr11:116849900-116853094 | 127.4010 | 119.8368 | -0.0883 | 0.177587 |
| <i>Gm10451</i>       | chr12:76444559-76451336   | 4.5925   | 2.5607   | -0.8427 | 0.315248 |
| <i>Mrpl36</i>        | chr13:73331008-73332175   | 35.5893  | 31.7967  | -0.1626 | 0.352879 |
| <i>Lrrc14b</i>       | chr13:74359577-74364005   | 2.3326   | 2.0141   | -0.2118 | 0.259658 |
| <i>Lysmd3</i>        | chr13:81657805-81671888   | 21.5001  | 22.7309  | 0.0803  | 0.386014 |
| <i>Sgtb</i>          | chr13:104109740-104141735 | 0.7499   | 0.6028   | -0.3151 | 0.199997 |
| <i>Hadhb</i>         | chr5:30155247-30184593    | 6.4446   | 6.7753   | 0.0722  | 0.293697 |
| <i>Cnot4</i>         | chr6:35022065-35133737    | 9.8294   | 10.3712  | 0.0774  | 0.429011 |
| <i>Hnrnpa2b1</i>     | chr6:51460433-51469894    | 159.3900 | 149.1721 | -0.0956 | 0.154993 |
| <i>Ppp4r2</i>        | chr6:100833637-100868717  | 13.4329  | 12.2295  | -0.1354 | 0.288199 |
| <i>Mical3</i>        | chr6:121007240-121081609  | 0.9129   | 0.7183   | -0.3457 | 0.331911 |
| <i>Ccdc9</i>         | chr7:16274041-16286795    | 8.2269   | 7.4823   | -0.1369 | 0.317657 |
| <i>Snord88a</i>      | chr7:44250134-44250224    | 9.7426   | 12.6633  | 0.3783  | 0.129918 |
| <i>Car11</i>         | chr7:45699842-45704682    | 0.3494   | 0.5028   | 0.5252  | 0.335471 |
| <i>Cib1</i>          | chr7:80227155-80232813    | 16.1003  | 14.8267  | -0.1189 | 0.128029 |
| <i>Bag3</i>          | chr7:128523582-128546977  | 0.6309   | 0.4859   | -0.3767 | 0.188284 |
| <i>Vps37a</i>        | chr8:40511782-40551134    | 14.9485  | 13.7413  | -0.1215 | 0.310044 |
| <i>Haus8</i>         | chr8:71248560-71272934    | 4.9100   | 5.1998   | 0.0827  | 0.325284 |
| <i>Nup93</i>         | chr8:94214596-94315066    | 18.8352  | 17.6336  | -0.0951 | 0.040823 |
| <i>Wwox</i>          | chr8:114439654-115352708  | 1.6139   | 1.7663   | 0.1302  | 0.439071 |
| <i>Emc8</i>          | chr8:120653913-120668573  | 4.5019   | 4.1308   | -0.1241 | 0.182394 |
| <i>Maml2</i>         | chr9:13619989-13709533    | 10.9515  | 11.7235  | 0.0983  | 0.512068 |
| <i>Ackr4</i>         | chr9:104098137-104126643  | 0.5809   | 0.4347   | -0.4182 | 0.142151 |
| <i>Xpnpep2</i>       | chrX:48108724-48136981    | 0.1578   | 0.2140   | 0.4394  | 0.278922 |
| <i>Trappc9</i>       | chr15:72589620-73061204   | 7.4410   | 6.7773   | -0.1348 | 0.344532 |
| <i>Grina</i>         | chr15:76246806-76249904   | 23.1529  | 24.9122  | 0.1057  | 0.488699 |
| <i>Extl3</i>         | chr14:65052059-65098106   | 10.5036  | 9.6113   | -0.1281 | 0.326169 |
| <i>Haghl</i>         | chr17:25779842-25785673   | 9.0215   | 9.5321   | 0.0794  | 0.271659 |
| <i>H2-T22</i>        | chr17:36037127-36042747   | 41.5899  | 38.2820  | -0.1196 | 0.272241 |
| <i>Gm26904</i>       | chr17:46471500-46825221   | 3.1533   | 3.6033   | 0.1924  | 0.397735 |
| <i>Slc3a1</i>        | chr17:85028346-85064243   | 1.0297   | 0.8351   | -0.3021 | 0.135552 |
| <i>Clec16a</i>       | chr16:10545338-10744878   | 3.8224   | 4.1408   | 0.1154  | 0.509404 |
| <i>Zfp654</i>        | chr16:64780350-64786321   | 18.3691  | 19.4143  | 0.0798  | 0.487882 |
| <i>Bbs1</i>          | chr19:4886897-4906627     | 0.2833   | 0.3518   | 0.3122  | 0.359375 |
| <i>Vcpip1</i>        | chr1:9718621-9748382      | 14.9367  | 15.5569  | 0.0587  | 0.467202 |
| <i>Ankrd44</i>       | chr1:54645339-54926387    | 43.3754  | 44.9641  | 0.0519  | 0.425001 |
| <i>Hspe1</i>         | chr1:55088131-55091307    | 24.9246  | 21.4235  | -0.2184 | 0.467466 |
| <i>Rps14</i>         | chr18:60774509-60778546   | 381.0020 | 335.6962 | -0.1826 | 0.426638 |
| <i>Dcaf17</i>        | chr2:71055327-71099142    | 7.2784   | 7.6514   | 0.0721  | 0.428985 |
| <i>Rapgef4os1</i>    | chr2:72097602-72148796    | 2.8584   | 2.1740   | -0.3949 | 0.328200 |
| <i>Hypk</i>          | chr2:121453289-121458672  | 10.6496  | 11.5809  | 0.1210  | 0.503906 |
| <i>Cables2</i>       | chr2:180258539-180273496  | 11.5533  | 10.5863  | -0.1261 | 0.306248 |
| <i>Gatb</i>          | chr3:85574118-85655622    | 4.9112   | 4.4417   | -0.1450 | 0.271639 |
| <i>Kcna2</i>         | chr3:107101566-107106879  | 7.4739   | 6.8574   | -0.1242 | 0.148501 |
| <i>Frrs1</i>         | chr3:116878226-116903750  | 7.5501   | 8.2269   | 0.1239  | 0.485872 |
| <i>1810037117Rik</i> | chr3:122924361-122926193  | 22.5676  | 24.5888  | 0.1238  | 0.429925 |
| <i>Leprot</i>        | chr4:101647717-101659364  | 12.4639  | 13.2228  | 0.0853  | 0.324989 |
| <i>Gm13207</i>       | chr4:148031553-148032326  | 1.6626   | 1.2271   | -0.4381 | 0.221939 |
| <i>Kcnh2</i>         | chr5:24319588-24351604    | 1.5243   | 1.3109   | -0.2176 | 0.343457 |
| <i>0610030E20Rik</i> | chr6:72347316-72353158    | 10.5912  | 11.2359  | 0.0853  | 0.470899 |
| <i>Rnf170</i>        | chr8:26119367-26143871    | 3.8550   | 4.1094   | 0.0922  | 0.259341 |
| <i>NA</i>            | chr8:122443655-122445647  | 10.1600  | 9.1454   | -0.1518 | 0.244092 |
| <i>Trav3-3</i>       | chr14:53665928-53666505   | 5.0874   | 3.9721   | -0.3570 | 0.279495 |
| <i>Slc25a24</i>      | chr3:109123148-109168457  | 3.6877   | 3.9913   | 0.1142  | 0.370804 |
| <i>Gm10275</i>       | chr10:29698745-29699379   | 5.4390   | 4.2638   | -0.3512 | 0.448929 |
| <i>NA</i>            | chr12:84417193-84418577   | 13.5918  | 14.9637  | 0.1387  | 0.484591 |
| <i>Rnf113a2</i>      | chr12:84417195-84418578   | 13.5918  | 14.9637  | 0.1387  | 0.484591 |
| <i>Amer1</i>         | chrX:95420317-95444872    | 5.1929   | 4.8072   | -0.1114 | 0.189785 |
| <i>Dlgap5</i>        | chr14:47387778-47418407   | 2.8685   | 3.1392   | 0.1301  | 0.504897 |

|                      |                           |          |          |         |          |
|----------------------|---------------------------|----------|----------|---------|----------|
| <i>Gm13608</i>       | chr2:31985058-31986464    | 1.9295   | 2.2851   | 0.2440  | 0.396477 |
| <i>Ly75</i>          | chr2:60292102-60383303    | 38.7033  | 35.5723  | -0.1217 | 0.360934 |
| <i>Arid5b</i>        | chr10:68095592-68278726   | 7.3314   | 7.9089   | 0.1094  | 0.499977 |
| <i>Dnah10</i>        | chr5:124725084-124834308  | 0.0809   | 0.0586   | -0.4662 | 0.261261 |
| <i>Zcwpw1</i>        | chr5:137787797-137822621  | 10.4770  | 11.2086  | 0.0974  | 0.435820 |
| <i>Smo</i>           | chr6:29735693-29761365    | 0.4173   | 0.3076   | -0.4401 | 0.328790 |
| <i>Skap2</i>         | chr6:51859165-52012549    | 4.3370   | 4.8163   | 0.1512  | 0.370490 |
| <i>Ing4</i>          | chr6:125039759-125051499  | 12.6603  | 11.8393  | -0.0967 | 0.123455 |
| <i>Gpaa1</i>         | chr15:76331230-76334907   | 10.7360  | 9.7181   | -0.1437 | 0.337073 |
| <i>Ncf4</i>          | chr15:78244800-78262580   | 25.8310  | 27.2527  | 0.0773  | 0.459481 |
| <i>Troap</i>         | chr15:99074972-99083407   | 0.3958   | 0.5420   | 0.4537  | 0.396125 |
| <i>Zfp407</i>        | chr18:84128026-84589725   | 7.2967   | 7.6051   | 0.0597  | 0.440910 |
| <i>Ensa</i>          | chr3:95624979-95632102    | 36.0905  | 33.2605  | -0.1178 | 0.266276 |
| <i>Shb</i>           | chr4:45423277-45532470    | 0.1886   | 0.2649   | 0.4900  | 0.249045 |
| <i>Trmt61a</i>       | chr12:111678104-111683902 | 9.8687   | 8.9342   | -0.1435 | 0.242948 |
| <i>Tsr2</i>          | chrX:151087093-151096543  | 7.3807   | 7.8879   | 0.0959  | 0.408419 |
| <i>1700037H04Rik</i> | chr2:131146324-131160081  | 4.2398   | 3.6748   | -0.2063 | 0.307656 |
| <i>Kcnab1</i>        | chr3:65109383-65378223    | 0.4950   | 0.4145   | -0.2560 | 0.303940 |
| <i>Rhbdd2</i>        | chr5:135632617-135646448  | 2.7118   | 2.9607   | 0.1267  | 0.498462 |
| <i>Chrna2</i>        | chr14:66140959-66152948   | 1.4941   | 1.7061   | 0.1914  | 0.394779 |
| <i>Fam73b</i>        | chr2:30364232-30385521    | 2.5071   | 2.2460   | -0.1587 | 0.293795 |
| <i>Emc7</i>          | chr2:112454996-112472162  | 10.1955  | 9.4471   | -0.1100 | 0.162703 |
| <i>Dffa</i>          | chr4:149104145-149120647  | 9.9856   | 9.1614   | -0.1243 | 0.196485 |
| <i>Rps9</i>          | chr7:3703992-3706901      | 309.1797 | 277.3235 | -0.1569 | 0.398334 |
| <i>Trp53</i>         | chr11:69580358-69591873   | 16.1890  | 14.7495  | -0.1344 | 0.361140 |
| <i>Rufy3</i>         | chr5:88583573-88642671    | 1.7602   | 1.5103   | -0.2209 | 0.357353 |
| <i>Gimap9</i>        | chr6:48676128-48679114    | 116.3811 | 122.6644 | 0.0759  | 0.444900 |
| <i>Sphk2</i>         | chr7:45709466-45718002    | 13.3528  | 14.0835  | 0.0769  | 0.416531 |
| <i>Fancb</i>         | chrX:164980591-164997272  | 2.7745   | 2.4291   | -0.1918 | 0.244728 |
| <i>Rmdn2</i>         | chr17:79614899-79682152   | 1.5279   | 1.8039   | 0.2395  | 0.346778 |
| <i>Prpf40a</i>       | chr2:53134703-53191284    | 24.5770  | 25.5380  | 0.0553  | 0.367872 |
| <i>Zfp408</i>        | chr2:91643668-91649791    | 12.4204  | 11.5552  | -0.1042 | 0.144918 |
| <i>Zbtb7b</i>        | chr3:89377643-89394776    | 0.3506   | 0.4453   | 0.3450  | 0.528125 |
| <i>Cnnm4</i>         | chr1:36471619-36508764    | 3.2335   | 2.8437   | -0.1853 | 0.378101 |
| <i>Vat1</i>          | chr11:101458744-101466230 | 8.0549   | 7.3234   | -0.1374 | 0.258234 |
| <i>Ankmy2</i>        | chr12:36157123-36197291   | 25.4677  | 26.6126  | 0.0634  | 0.329458 |
| <i>Ppm1g</i>         | chr5:31202667-31220545    | 64.5434  | 59.4809  | -0.1178 | 0.290529 |
| <i>Zfp317</i>        | chr9:19641223-19648048    | 33.6477  | 31.1998  | -0.1090 | 0.160824 |
| <i>Thrb</i>          | chr14:17660959-18038088   | 0.8416   | 0.9584   | 0.1875  | 0.423514 |
| <i>Nudt5</i>         | chr2:5845018-5871895      | 9.5774   | 8.8395   | -0.1157 | 0.225467 |
| <i>Ada</i>           | chr2:163726583-163750239  | 6.6836   | 6.0020   | -0.1552 | 0.160932 |
| <i>Stx11</i>         | chr10:12939982-12964259   | 2.0582   | 2.3869   | 0.2138  | 0.477277 |
| <i>Gm16365</i>       | chr10:39558495-39613682   | 3.2808   | 2.7638   | -0.2474 | 0.314626 |
| <i>Smg6</i>          | chr11:74925822-75164448   | 12.3534  | 12.8740  | 0.0596  | 0.416114 |
| <i>Rtn4r1</i>        | chr11:75193782-75267769   | 7.3985   | 6.7151   | -0.1398 | 0.309053 |
| <i>Hsd17b1</i>       | chr11:101078410-101080527 | 0.6423   | 0.4198   | -0.6137 | 0.248773 |
| <i>Slc12a7</i>       | chr13:73763696-73816743   | 68.1874  | 63.5925  | -0.1006 | 0.259487 |
| <i>4930522L14Rik</i> | chr5:109735989-109751886  | 6.4600   | 7.2428   | 0.1650  | 0.531146 |
| <i>Hip1</i>          | chr5:135406522-13545122   | 0.7606   | 1.0605   | 0.4795  | 0.376310 |
| <i>0610040B10Rik</i> | chr5:143329246-143332704  | 1.5231   | 1.9483   | 0.3552  | 0.298970 |
| <i>Ifi30</i>         | chr8:70762773-70766663    | 9.8815   | 10.7568  | 0.1224  | 0.183228 |
| <i>Mcrs1</i>         | chr15:99242817-99251961   | 7.3785   | 6.6372   | -0.1528 | 0.210727 |
| <i>Syt15</i>         | chr14:34219594-34230421   | 0.1537   | 0.2082   | 0.4382  | 0.312767 |
| <i>Trav14d-3-dv8</i> | chr14:53078579-53079045   | 4.3393   | 5.4074   | 0.3175  | 0.323200 |
| <i>D16Erd472e</i>    | chr16:78544011-78576657   | 42.9316  | 40.1334  | -0.0972 | 0.115701 |
| <i>Gm10125</i>       | chr18:5491502-5593505     | 0.7044   | 0.7959   | 0.1762  | 0.379115 |
| <i>Nacc2</i>         | chr2:26055534-26123220    | 2.3832   | 2.7602   | 0.2119  | 0.549340 |
| <i>Gm24494</i>       | chr3:153911609-153911690  | 24.1767  | 29.9422  | 0.3086  | 0.362218 |
| <i>Lrrc40</i>        | chr3:158036661-158068478  | 7.2259   | 7.6426   | 0.0809  | 0.379004 |
| <i>Snip1</i>         | chr4:125066671-125074042  | 25.4199  | 23.4922  | -0.1138 | 0.199997 |
| <i>Rbm44</i>         | chr1:91145102-91170795    | 0.2453   | 0.5931   | 1.2738  | 0.283387 |
| <i>Alg11</i>         | chr8:22060720-22071627    | 10.8799  | 9.9957   | -0.1223 | 0.250364 |
| <i>Senp6</i>         | chr9:80066902-80144953    | 43.8045  | 45.4837  | 0.0543  | 0.348392 |
| <i>Gm20417</i>       | chr19:5797561-5798549     | 891.2016 | 788.6527 | -0.1764 | 0.475389 |
| <i>Tmem208</i>       | chr8:105326353-105335219  | 27.5252  | 25.4725  | -0.1118 | 0.156205 |
| <i>Ccdc82</i>        | chr9:13246981-13289409    | 44.2412  | 46.4498  | 0.0703  | 0.375466 |
| <i>Trbj2-2</i>       | chr6:41542956-41543007    | 169.5101 | 146.9817 | -0.2057 | 0.295671 |
| <i>Heca</i>          | chr10:17900465-17948067   | 65.2510  | 61.7317  | -0.0800 | 0.074234 |
| <i>Pias4</i>         | chr10:81153265-81167923   | 6.9835   | 6.3307   | -0.1416 | 0.318274 |
| <i>Snrpf</i>         | chr10:93583028-93589706   | 19.0159  | 16.5433  | -0.2010 | 0.407649 |
| <i>Fam64a</i>        | chr11:72042031-72047370   | 0.6857   | 0.8630   | 0.3318  | 0.439396 |

|                      |                           |           |           |         |          |
|----------------------|---------------------------|-----------|-----------|---------|----------|
| <i>Eral1</i>         | chr11:78073375-78080383   | 13.0140   | 13.7915   | 0.0837  | 0.337285 |
| <i>Rala</i>          | chr13:17880574-17944239   | 19.7996   | 21.5105   | 0.1196  | 0.482584 |
| <i>A730081D07Rik</i> | chr13:40956413-41001151   | 0.7752    | 0.9581    | 0.3056  | 0.289687 |
| <i>Sec31a</i>        | chr5:100361648-100416234  | 15.3976   | 15.9936   | 0.0548  | 0.407871 |
| <i>Sbno1</i>         | chr5:124368701-124425914  | 34.3795   | 35.4774   | 0.0454  | 0.418729 |
| <i>Eefsec</i>        | chr6:88257333-88446539    | 16.8549   | 17.7783   | 0.0769  | 0.398602 |
| <i>Aebp2</i>         | chr6:140622448-140678472  | 20.3027   | 19.0101   | -0.0949 | 0.202624 |
| <i>Pde2a</i>         | chr7:101421690-101512829  | 51.7038   | 56.2591   | 0.1218  | 0.539163 |
| <i>Trim30a</i>       | chr7:104409024-104465193  | 65.7854   | 70.3746   | 0.0973  | 0.537838 |
| <i>Phkg2</i>         | chr7:127573339-127583305  | 17.6799   | 18.3695   | 0.0552  | 0.363724 |
| <i>1110032A03Rik</i> | chr9:50762827-50775520    | 3.3737    | 3.6458    | 0.1119  | 0.455873 |
| <i>Car12</i>         | chr9:66713685-66766845    | 3.3500    | 3.7158    | 0.1495  | 0.497965 |
| <i>Adam10</i>        | chr9:70678996-70780229    | 27.1224   | 28.3187   | 0.0623  | 0.428684 |
| <i>lfrd2</i>         | chr9:107587717-107593038  | 17.7846   | 16.3004   | -0.1257 | 0.250606 |
| <i>Slc25a53</i>      | chrX:136981115-137038302  | 3.6650    | 3.3748    | -0.1190 | 0.177663 |
| <i>Hnrnp1l</i>       | chr17:80029486-80062334   | 9.3544    | 8.5746    | -0.1256 | 0.210128 |
| <i>Sos1</i>          | chr17:80393751-80480453   | 7.5023    | 8.1328    | 0.1164  | 0.561089 |
| <i>lldr1</i>         | chr16:36693977-36726804   | 1.6839    | 1.9222    | 0.1910  | 0.494192 |
| <i>Pcnp</i>          | chr16:56007244-56029739   | 17.8206   | 18.8814   | 0.0834  | 0.432738 |
| <i>Copa</i>          | chr1:172082528-172122330  | 46.8115   | 44.0004   | -0.0893 | 0.121843 |
| <i>Gm10517</i>       | chr1:182408618-182409020  | 1.5430    | 2.0967    | 0.4425  | 0.210490 |
| <i>Pik3c3</i>        | chr18:30272746-30348126   | 22.1741   | 22.9336   | 0.0486  | 0.206016 |
| <i>Gm24875</i>       | chr2:25031349-25031453    | 6.5030    | 8.7760    | 0.4325  | 0.200771 |
| <i>Traf1</i>         | chr2:34941749-34961772    | 35.4745   | 36.7300   | 0.0502  | 0.437819 |
| <i>Zdhhc5</i>        | chr2:84687969-84715180    | 21.9591   | 20.6255   | -0.0904 | 0.119451 |
| <i>Gm23650</i>       | chr2:130277696-130277766  | 25.6068   | 18.4564   | -0.4724 | 0.373038 |
| <i>Serinc3</i>       | chr2:163623271-163645131  | 77.7295   | 80.2617   | 0.0462  | 0.376392 |
| <i>Bmp7</i>          | chr2:172868011-172940321  | 0.2498    | 0.1768    | -0.4986 | 0.292566 |
| <i>Gm14292</i>       | chr2:179177424-179177880  | 2.2148    | 2.8407    | 0.3591  | 0.216489 |
| <i>Gm5466</i>        | chr2:181896822-181898712  | 0.5192    | 0.3792    | -0.4533 | 0.177206 |
| <i>Trim45</i>        | chr3:100922201-100936925  | 0.6200    | 0.5200    | -0.2538 | 0.177010 |
| <i>Spata1</i>        | chr3:146457202-146499753  | 4.1532    | 4.4452    | 0.0980  | 0.372990 |
| <i>Inip</i>          | chr4:59769636-59801589    | 10.4663   | 10.9688   | 0.0677  | 0.386833 |
| <i>Slc35e2</i>       | chr4:155601415-155623340  | 20.3707   | 19.1039   | -0.0926 | 0.166106 |
| <i>Krcc1</i>         | chr6:71272018-71285318    | 59.0016   | 62.6978   | 0.0877  | 0.476059 |
| <i>Jmjd1c</i>        | chr10:67096124-67256326   | 20.8325   | 21.6537   | 0.0558  | 0.467415 |
| <i>Gm26982</i>       | chr6:113714970-113716121  | 8.9276    | 7.9326    | -0.1705 | 0.251959 |
| <i>Gm22204</i>       | chr8:3615528-3615855      | 6.9152    | 5.5657    | -0.3132 | 0.241379 |
| <i>Genpn</i>         | chr8:116921739-116941503  | 1.7984    | 2.0755    | 0.2067  | 0.318363 |
| <i>Thoc2</i>         | chrX:41794990-41920674    | 27.1994   | 28.2682   | 0.0556  | 0.413681 |
| <i>Ubox5</i>         | chr2:130590001-130630038  | 6.1896    | 5.7050    | -0.1176 | 0.174165 |
| <i>Gm16213</i>       | chr3:152920239-152921399  | 2.6200    | 3.1968    | 0.2871  | 0.316398 |
| <i>Ins13</i>         | chr8:71689213-71690575    | 21.4556   | 24.4833   | 0.1904  | 0.546742 |
| <i>Sdhaf2</i>        | chr19:10500512-10525209   | 17.7960   | 18.6936   | 0.0710  | 0.381337 |
| <i>9330151L19Rik</i> | chr12:69197210-69199868   | 12.2166   | 11.2591   | -0.1178 | 0.208564 |
| <i>Ylpm1</i>         | chr12:84996320-85070515   | 6.4960    | 7.0038    | 0.1086  | 0.560922 |
| <i>Whsc1</i>         | chr5:33820724-33897975    | 4.1772    | 4.5558    | 0.1252  | 0.570413 |
| <i>Arglu1</i>        | chr8:8666576-8690537      | 117.8741  | 110.8782  | -0.0883 | 0.148479 |
| <i>Cep295</i>        | chr9:15316914-15357788    | 13.8432   | 14.4692   | 0.0638  | 0.490479 |
| <i>Mcam</i>          | chr9:44134468-44142727    | 0.5629    | 0.6972    | 0.3088  | 0.460184 |
| <i>Rpp14</i>         | chr14:8090077-8090554     | 28.8861   | 31.1128   | 0.1071  | 0.348801 |
| <i>Arhgap19</i>      | chr19:41766587-41802084   | 1.8201    | 2.0553    | 0.1753  | 0.525535 |
| <i>Mtf1</i>          | chr4:124802103-124849800  | 4.4953    | 4.1647    | -0.1102 | 0.200109 |
| <i>Zswim6</i>        | chr13:107724617-107890064 | 12.1945   | 12.7799   | 0.0676  | 0.373620 |
| <i>Kcnn5</i>         | chr12:74897216-75177332   | 0.3103    | 0.2302    | -0.4311 | 0.298291 |
| <i>Rgs12</i>         | chr5:34949444-35039644    | 1.1599    | 1.0053    | -0.2064 | 0.355975 |
| <i>A630023P12Rik</i> | chr5:110514922-110525980  | 3.1963    | 3.7868    | 0.2445  | 0.471867 |
| <i>Dlat</i>          | chr9:50634632-50659780    | 9.1832    | 9.6200    | 0.0670  | 0.377409 |
| <i>Stat4</i>         | chr1:51987147-52107188    | 104.0719  | 107.8977  | 0.0521  | 0.401162 |
| <i>Gm5533</i>        | chr1:181851573-181853189  | 0.9967    | 0.7121    | -0.4851 | 0.357616 |
| <i>Impact</i>        | chr18:12972251-12992948   | 12.7859   | 13.5519   | 0.0839  | 0.467485 |
| <i>Klf13</i>         | chr7:63886350-63938915    | 42.6118   | 38.8301   | -0.1341 | 0.395634 |
| <i>BC035044</i>      | chr6:128848043-128891126  | 3.8430    | 4.2023    | 0.1289  | 0.412848 |
| <i>Rras</i>          | chr7:45017977-45021646    | 2.9177    | 3.3772    | 0.2110  | 0.207473 |
| <i>Aaas</i>          | chr15:102338246-102350759 | 20.7867   | 21.7378   | 0.0645  | 0.185650 |
| <i>Mr1</i>           | chr1:155127877-155146780  | 10.5906   | 11.3158   | 0.0956  | 0.459567 |
| <i>Snora17</i>       | chr2:26639189-26639321    | 18.0365   | 14.4872   | -0.3161 | 0.239776 |
| <i>Zfp772</i>        | chr7:7202121-7209998      | 2.4448    | 2.1455    | -0.1884 | 0.120919 |
| <i>Z310022A10Rik</i> | chr7:27553294-27582094    | 2.6139    | 2.9257    | 0.1625  | 0.382307 |
| <i>Prkar2a</i>       | chr9:108692142-108749512  | 5.6228    | 6.1043    | 0.1185  | 0.472237 |
| <i>Ccdc107</i>       | chr4:43492899-43495921    | 1305.1244 | 1435.4256 | 0.1373  | 0.566514 |

|                       |                           |          |          |         |          |
|-----------------------|---------------------------|----------|----------|---------|----------|
| <i>Marcks</i>         | chr10:37133374-37138920   | 1.2384   | 1.0587   | -0.2262 | 0.222327 |
| <i>Smpd2</i>          | chr10:41485641-41490369   | 21.9711  | 22.7394  | 0.0496  | 0.368453 |
| <i>Gm26789</i>        | chr10:63292285-63295793   | 5.6659   | 5.0412   | -0.1686 | 0.364733 |
| <i>Cabin1</i>         | chr10:75646109-75764357   | 21.1554  | 19.2786  | -0.1340 | 0.415830 |
| <i>Apc2</i>           | chr10:80295976-80318263   | 0.8440   | 0.7509   | -0.1686 | 0.158104 |
| <i>Galnt4</i>         | chr10:99108134-99113245   | 6.9633   | 6.4250   | -0.1161 | 0.204399 |
| <i>Rab3ip</i>         | chr10:116905783-116950380 | 25.1252  | 26.4319  | 0.0731  | 0.438571 |
| <i>A430046D13Rik</i>  | chr10:128499363-128504242 | 7.7098   | 6.8815   | -0.1640 | 0.354184 |
| <i>Uqcr10</i>         | chr11:4701972-4704342     | 64.7767  | 58.3906  | -0.1497 | 0.345238 |
| <i>Nudcd3</i>         | chr11:6105690-6200415     | 12.9542  | 13.3859  | 0.0473  | 0.229669 |
| <i>Purb</i>           | chr11:6467598-6476076     | 40.2941  | 37.3185  | -0.1107 | 0.328987 |
| <i>Gm22123</i>        | chr11:6472224-6472277     | 144.7255 | 126.3203 | -0.1962 | 0.311922 |
| <i>Gm22457</i>        | chr11:6528032-6528165     | 27.7271  | 22.4794  | -0.3027 | 0.365146 |
| <i>Etaa1os</i>        | chr11:17953969-17959578   | 1.5433   | 1.9063   | 0.3048  | 0.214560 |
| <i>9930111J21Rik1</i> | chr11:48946149-48979398   | 9.2456   | 9.6544   | 0.0624  | 0.385480 |
| <i>Sec24a</i>         | chr11:51692263-51763634   | 4.9144   | 5.4343   | 0.1451  | 0.586224 |
| <i>Mfap3</i>          | chr11:57518663-57533815   | 14.4462  | 13.5071  | -0.0970 | 0.160982 |
| <i>Gm12246</i>        | chr11:58126067-58128512   | 1.5241   | 2.0876   | 0.4539  | 0.429612 |
| <i>Tnfrsf13b</i>      | chr11:61126754-61149372   | 10.9421  | 10.0969  | -0.1160 | 0.141410 |
| <i>Gm26964</i>        | chr11:61865474-61867639   | 7.1056   | 7.9107   | 0.1548  | 0.371603 |
| <i>Cluh</i>           | chr11:74649494-74670847   | 15.7194  | 14.6075  | -0.1058 | 0.307145 |
| <i>Rad51d</i>         | chr11:82876433-82890614   | 9.6990   | 8.8641   | -0.1299 | 0.288375 |
| <i>Sjfn10-ps</i>      | chr11:83028129-83040042   | 6.7100   | 7.0773   | 0.0769  | 0.256330 |
| <i>Akap1</i>          | chr11:88830791-88864586   | 1.7574   | 1.9567   | 0.1550  | 0.377286 |
| <i>Gm11532</i>        | chr11:97020507-97026248   | 0.8195   | 0.6863   | -0.2558 | 0.290652 |
| <i>Gm27029</i>        | chr11:101406691-101424796 | 11.6912  | 10.6566  | -0.1337 | 0.225260 |
| <i>Nbr1</i>           | chr11:101552148-101581951 | 32.9023  | 30.9551  | -0.0880 | 0.142568 |
| <i>Arhgap27os3</i>    | chr11:103344752-103350124 | 15.1602  | 16.0743  | 0.0845  | 0.497819 |
| <i>Gm26613</i>        | chr11:115615461-115626707 | 3.1964   | 3.6296   | 0.1834  | 0.367020 |
| <i>Gm11766</i>        | chr11:119938510-119942074 | 1.6956   | 1.4605   | -0.2153 | 0.240984 |
| <i>Pqlc3</i>          | chr12:16988647-17000408   | 6.5827   | 7.0024   | 0.0892  | 0.498288 |
| <i>Cog5</i>           | chr12:31654868-31937630   | 34.7384  | 31.8908  | -0.1234 | 0.339779 |
| <i>Pnn</i>            | chr12:59066918-59074017   | 48.5073  | 45.1875  | -0.1023 | 0.230085 |
| <i>Actn1</i>          | chr12:80167541-80260371   | 120.5461 | 113.7991 | -0.0831 | 0.132880 |
| <i>Cox16</i>          | chr12:81359025-81485127   | 10.4792  | 11.2476  | 0.1021  | 0.462582 |
| <i>Noxred1</i>        | chr12:87221254-87233556   | 0.8267   | 0.5776   | -0.5172 | 0.308660 |
| <i>Vipas39</i>        | chr12:87238874-87266286   | 22.0729  | 20.4644  | -0.1092 | 0.187787 |
| <i>Ippk</i>           | chr13:49421310-49462990   | 13.1387  | 12.1865  | -0.1085 | 0.177453 |
| <i>Cdk20</i>          | chr13:64432552-64439720   | 2.3174   | 1.9686   | -0.2353 | 0.211900 |
| <i>Ptdss1</i>         | chr13:66932829-66998401   | 25.2278  | 23.2744  | -0.1163 | 0.302958 |
| <i>Gm26965</i>        | chr13:67491151-67526151   | 16.1119  | 14.6589  | -0.1364 | 0.242455 |
| <i>Gm26819</i>        | chr13:69809913-69816094   | 11.2031  | 10.3832  | -0.1096 | 0.209957 |
| <i>Magi2</i>          | chr5:19227045-20704798    | 0.3849   | 0.4523   | 0.2328  | 0.290836 |
| <i>Fam185a</i>        | chr5:21424957-21482124    | 2.9167   | 3.1721   | 0.1211  | 0.365490 |
| <i>Rint1</i>          | chr5:23787710-23820369    | 7.0253   | 6.5563   | -0.0997 | 0.105856 |
| <i>Tmub1</i>          | chr5:24445457-24447854    | 7.0776   | 7.7917   | 0.1387  | 0.444717 |
| <i>Nub1</i>           | chr5:24685814-24710555    | 56.3995  | 58.2251  | 0.0460  | 0.316565 |
| <i>Gm15522</i>        | chr5:34650717-34652477    | 9.7922   | 8.5168   | -0.2013 | 0.297384 |
| <i>5430403G16Rik</i>  | chr5:109674544-109691041  | 6.6655   | 6.0772   | -0.1333 | 0.196550 |
| <i>Mdh2</i>           | chr5:135778479-135790398  | 39.2872  | 36.0868  | -0.1226 | 0.319496 |
| <i>Tsc22d4</i>        | chr5:137745729-137768450  | 12.2335  | 11.1013  | -0.1401 | 0.419288 |
| <i>Kdelr2</i>         | chr5:143403819-143421900  | 19.7111  | 20.7526  | 0.0743  | 0.405882 |
| <i>Rbm28</i>          | chr6:29123572-29165006    | 14.8394  | 15.4839  | 0.0613  | 0.363832 |
| <i>Hipk2</i>          | chr6:38694389-38876165    | 2.5757   | 3.1339   | 0.2830  | 0.440369 |
| <i>Trbv2</i>          | chr6:41047555-41047995    | 47.8622  | 42.6656  | -0.1658 | 0.301021 |
| <i>Mturn</i>          | chr6:54681771-54700406    | 29.0441  | 26.7638  | -0.1180 | 0.249417 |
| <i>Cct7</i>           | chr6:85451504-85468477    | 89.7905  | 83.1707  | -0.1105 | 0.279549 |
| <i>Zxdc</i>           | chr6:90369491-90403490    | 7.3672   | 6.8565   | -0.1036 | 0.243130 |
| <i>Lrig1</i>          | chr6:94604528-94700158    | 8.2196   | 7.5546   | -0.1217 | 0.314430 |
| <i>Mitf</i>           | chr6:97807057-98021349    | 0.2132   | 0.1599   | -0.4153 | 0.283890 |
| <i>Arl8b</i>          | chr6:108783058-108823723  | 30.5148  | 31.4653  | 0.0443  | 0.125278 |
| <i>Zfp248</i>         | chr6:118427318-118455528  | 0.7445   | 0.6214   | -0.2608 | 0.270966 |
| <i>Pianp</i>          | chr6:124996693-125003096  | 0.3455   | 0.2413   | -0.5176 | 0.363563 |
| <i>Cdkn1b</i>         | chr6:134920400-134925513  | 69.8229  | 72.7872  | 0.0600  | 0.471473 |
| <i>Prpf31</i>         | chr7:3629984-3642486      | 18.7109  | 19.4426  | 0.0553  | 0.398554 |
| <i>Gltscr1</i>        | chr7:15971261-15999495    | 3.0744   | 3.4675   | 0.1736  | 0.544150 |
| <i>Kptn</i>           | chr7:16119894-16127516    | 6.2935   | 5.7725   | -0.1247 | 0.146763 |
| <i>Ercc1</i>          | chr7:19344777-19356524    | 10.0346  | 9.0511   | -0.1488 | 0.319904 |
| <i>Eif3k</i>          | chr7:28971372-28981814    | 240.7206 | 259.8702 | 0.1104  | 0.531577 |
| <i>Tmem143</i>        | chr7:45896940-45917413    | 2.3312   | 2.1051   | -0.1471 | 0.201555 |
| <i>Gm9392</i>         | chr7:46820266-46822048    | 3.9391   | 4.4949   | 0.1904  | 0.432808 |



|                      |                           |          |          |         |          |
|----------------------|---------------------------|----------|----------|---------|----------|
| <i>Z310044K18Rik</i> | chr7:83659574-83660963    | 8.6935   | 7.3721   | -0.2379 | 0.347554 |
| <i>Rsf1os1</i>       | chr7:97598348-97645112    | 3.6110   | 2.7162   | -0.4108 | 0.295198 |
| <i>Spcs2</i>         | chr7:99837568-99858883    | 36.6449  | 38.1751  | 0.0590  | 0.423707 |
| <i>Snord14a</i>      | chr7:116333170-116333257  | 26.7921  | 21.7008  | -0.3041 | 0.190564 |
| <i>Gm26690</i>       | chr7:127982569-127984881  | 3.3134   | 3.7011   | 0.1597  | 0.437780 |
| <i>Uros</i>          | chr7:133686242-133710072  | 6.2017   | 5.6950   | -0.1230 | 0.169762 |
| <i>Inpp5a</i>        | chr7:139389108-139579652  | 2.4803   | 2.1937   | -0.1771 | 0.246936 |
| <i>Paax</i>          | chr7:140125656-140134334  | 1.1798   | 0.9293   | -0.3443 | 0.265712 |
| <i>Tspan32os</i>     | chr7:142988968-143008033  | 5.0946   | 4.4063   | -0.2094 | 0.142526 |
| <i>Tnfrsf22</i>      | chr7:143634807-143649661  | 3.6810   | 3.3028   | -0.1564 | 0.300350 |
| <i>NA</i>            | chr8:8689665-8690644      | 34.0416  | 38.0107  | 0.1591  | 0.482011 |
| <i>D8Erttd82e</i>    | chr8:36094827-36147787    | 6.0879   | 6.6664   | 0.1310  | 0.569206 |
| <i>Ndufa13</i>       | chr8:69894187-69902558    | 77.4445  | 83.9364  | 0.1161  | 0.535829 |
| <i>Zfp961</i>        | chr8:71951037-71993408    | 9.9174   | 10.3981  | 0.0683  | 0.351125 |
| <i>Gm17435</i>       | chr8:72492933-72505499    | 2.7907   | 3.1757   | 0.1864  | 0.544039 |
| <i>Il27ra</i>        | chr8:84030286-84042575    | 118.8047 | 111.0701 | -0.0971 | 0.268046 |
| <i>Aktip</i>         | chr8:91112040-91134465    | 14.6924  | 15.3167  | 0.0600  | 0.247219 |
| <i>Cmtm4</i>         | chr8:104348190-104395807  | 1.4061   | 1.2498   | -0.1701 | 0.256756 |
| <i>Rpl13</i>         | chr8:123102349-123105244  | 40.1124  | 36.2943  | -0.1443 | 0.377257 |
| <i>Pcnxl2</i>        | chr8:125751508-125898293  | 0.2746   | 0.2152   | -0.3513 | 0.316190 |
| <i>Gm10684</i>       | chr9:45107175-45135606    | 9.2216   | 9.8472   | 0.0947  | 0.438077 |
| <i>Glce</i>          | chr9:62057247-62070606    | 6.8111   | 6.3003   | -0.1125 | 0.109374 |
| <i>Gcom1</i>         | chr9:71479324-71592265    | 19.2970  | 20.5568  | 0.0912  | 0.457385 |
| <i>Rab27a</i>        | chr9:73044864-73097592    | 30.3772  | 31.4982  | 0.0523  | 0.317939 |
| <i>Gm20529</i>       | chr9:108051674-108058592  | 48.8755  | 53.8174  | 0.1390  | 0.434299 |
| <i>Smarrcc1</i>      | chr9:110132036-110240178  | 12.7436  | 13.4212  | 0.0747  | 0.512292 |
| <i>Acaa1a</i>        | chr9:119339675-119350299  | 14.1264  | 13.1548  | -0.1028 | 0.202819 |
| <i>Pqbp1</i>         | chrX:7894518-7899269      | 47.8401  | 51.7090  | 0.1122  | 0.518497 |
| <i>Renbp</i>         | chrX:73922120-73930850    | 0.3937   | 0.5050   | 0.3589  | 0.216053 |
| <i>Fam3a</i>         | chrX:74384718-74393272    | 6.1436   | 5.5274   | -0.1525 | 0.287261 |
| <i>Atrx</i>          | chrX:105797614-105929397  | 46.9445  | 48.5945  | 0.0498  | 0.368588 |
| <i>Rragb</i>         | chrX:153139980-153171943  | 6.8353   | 7.3435   | 0.1035  | 0.383238 |
| <i>Ptger4</i>        | chr15:5206660-5244187     | 8.2288   | 8.5913   | 0.0622  | 0.428908 |
| <i>Tmem71</i>        | chr15:66526211-66561046   | 85.8382  | 89.1978  | 0.0554  | 0.419301 |
| <i>Sla</i>           | chr15:66780818-66831829   | 36.7333  | 38.1057  | 0.0529  | 0.482906 |
| <i>Recql4</i>        | chr15:76703552-76710559   | 1.3274   | 1.4825   | 0.1594  | 0.330467 |
| <i>Gm17206</i>       | chr15:83102071-83105929   | 4.0413   | 4.7585   | 0.2357  | 0.232711 |
| <i>Cpt1b</i>         | chr15:89416404-89425863   | 1.1828   | 1.0042   | -0.2362 | 0.212069 |
| <i>Prickle1</i>      | chr15:93499113-93595891   | 0.9327   | 0.7991   | -0.2230 | 0.076515 |
| <i>Gm17349</i>       | chr15:99702175-99705490   | 3.7270   | 2.7406   | -0.4435 | 0.307063 |
| <i>Eif4b</i>         | chr15:102073772-102097172 | 174.2297 | 182.5934 | 0.0676  | 0.487422 |
| <i>Pfdn5</i>         | chr15:102326115-102331873 | 116.3291 | 137.2342 | 0.2384  | 0.383671 |
| <i>Top2b</i>         | chr14:16365178-16430787   | 161.4684 | 149.9669 | -0.1066 | 0.304729 |
| <i>Arf4</i>          | chr14:26638073-26665084   | 16.9038  | 15.7718  | -0.1000 | 0.067240 |
| <i>Fam208a</i>       | chr14:27428846-27483552   | 52.5819  | 48.9416  | -0.1035 | 0.288062 |
| <i>Prkcd</i>         | chr14:30595355-30626210   | 11.1484  | 10.3688  | -0.1046 | 0.196959 |
| <i>Tspan14</i>       | chr14:40906444-40966807   | 39.5611  | 36.9183  | -0.0997 | 0.201392 |
| <i>Psmc6</i>         | chr14:45329823-45349071   | 71.1727  | 75.3155  | 0.0816  | 0.476660 |
| <i>Gm15601</i>       | chr14:45587739-45598512   | 3.2113   | 2.8878   | -0.1532 | 0.239399 |
| <i>Abhd4</i>         | chr14:54254128-54269169   | 0.8441   | 1.0035   | 0.2495  | 0.336728 |
| <i>Pabpn1</i>        | chr14:54892499-54898169   | 36.9780  | 34.1434  | -0.1151 | 0.301926 |
| <i>Fdft1</i>         | chr14:63145152-63177793   | 6.2966   | 6.6946   | 0.0884  | 0.214204 |
| <i>Tbc1d4</i>        | chr14:101442359-101609191 | 1.6244   | 1.8110   | 0.1569  | 0.532309 |
| <i>Tmem181a</i>      | chr17:6270474-6305783     | 3.0899   | 3.4263   | 0.1491  | 0.297185 |
| <i>Zfp213</i>        | chr17:23556768-23564226   | 9.3406   | 8.3967   | -0.1537 | 0.347465 |
| <i>Spsb3</i>         | chr17:24886642-24892152   | 22.7186  | 21.2761  | -0.0946 | 0.155407 |
| <i>Zfp81</i>         | chr17:33329341-33358878   | 5.1313   | 5.4603   | 0.0897  | 0.407431 |
| <i>H2-Q5</i>         | chr17:35394125-35397800   | 41.8283  | 43.7510  | 0.0648  | 0.464338 |
| <i>Atat1</i>         | chr17:35897594-35910075   | 0.9734   | 1.1259   | 0.2101  | 0.403160 |
| <i>H2-T23</i>        | chr17:36029772-36032855   | 95.1595  | 98.8856  | 0.0554  | 0.491667 |
| <i>Runx2os1</i>      | chr17:44735844-44737612   | 1.9507   | 2.5927   | 0.4105  | 0.431229 |
| <i>Gm16172</i>       | chr17:45663518-45666209   | 3.6345   | 4.2412   | 0.2227  | 0.170525 |
| <i>Mpnd</i>          | chr17:56005710-56016790   | 30.6883  | 28.1862  | -0.1227 | 0.297022 |
| <i>4930405O22Rik</i> | chr17:63305445-63312973   | 1.7253   | 1.2810   | -0.4296 | 0.437928 |
| <i>Ypel1</i>         | chr16:17069695-17087045   | 5.9984   | 6.3643   | 0.0854  | 0.458609 |
| <i>Smpd4</i>         | chr16:17619353-17644828   | 5.7441   | 5.9923   | 0.0610  | 0.418521 |
| <i>Med15</i>         | chr16:17651220-17722930   | 9.7962   | 10.5793  | 0.1110  | 0.513779 |
| <i>Tango2</i>        | chr16:18300824-18348103   | 2.9445   | 3.1298   | 0.0881  | 0.398137 |
| <i>Dvl3</i>          | chr16:20516981-20532520   | 2.7530   | 3.1088   | 0.1753  | 0.533388 |
| <i>Etv5</i>          | chr16:22381308-22439719   | 0.2302   | 0.3003   | 0.3838  | 0.288068 |
| <i>Snora81</i>       | chr16:23110755-23110933   | 247.8312 | 275.6563 | 0.1535  | 0.569241 |

|                      |                          |          |          |         |          |
|----------------------|--------------------------|----------|----------|---------|----------|
| <i>Pigz</i>          | chr16:31933850-31946046  | 0.8731   | 1.0256   | 0.2322  | 0.228990 |
| <i>Zbtb11</i>        | chr16:55966274-56008913  | 25.4718  | 23.8912  | -0.0924 | 0.167409 |
| <i>Btg3</i>          | chr16:78359859-78377192  | 0.7336   | 0.9194   | 0.3257  | 0.124528 |
| <i>1700092M07Rik</i> | chr19:8740717-8741225    | 2.8001   | 1.9482   | -0.5233 | 0.317750 |
| <i>1110059E24Rik</i> | chr19:21581201-21652976  | 6.8548   | 6.2789   | -0.1266 | 0.127006 |
| <i>Gm9493</i>        | chr19:23619741-23620320  | 1.6819   | 1.1740   | -0.5187 | 0.332723 |
| <i>Ppapdc2</i>       | chr19:28963919-28966798  | 8.0794   | 8.5711   | 0.0852  | 0.390151 |
| <i>Fas</i>           | chr19:34290658-34327770  | 16.7376  | 15.1844  | -0.1405 | 0.306374 |
| <i>Fam178a</i>       | chr19:44931118-44983787  | 21.9243  | 20.5718  | -0.0919 | 0.193075 |
| <i>Nt5c2</i>         | chr19:46886830-47015153  | 7.2469   | 7.6294   | 0.0742  | 0.342707 |
| <i>Paqr8</i>         | chr1:20890621-20938755   | 3.3240   | 3.0134   | -0.1415 | 0.199645 |
| <i>Smap1</i>         | chr1:23844845-23922317   | 14.6720  | 15.6049  | 0.0889  | 0.502446 |
| <i>Tpp2</i>          | chr1:43934001-44002999   | 49.8319  | 51.7598  | 0.0548  | 0.432686 |
| <i>Creb1</i>         | chr1:64532803-64604547   | 38.0204  | 40.1355  | 0.0781  | 0.476529 |
| <i>Zfand2b</i>       | chr1:75168645-75171629   | 12.0477  | 10.9440  | -0.1386 | 0.256625 |
| <i>Gm16083</i>       | chr1:130462575-130557075 | 3.2328   | 3.7127   | 0.1997  | 0.487883 |
| <i>Zfp281</i>        | chr1:136624900-136630053 | 34.8819  | 36.0557  | 0.0477  | 0.354647 |
| <i>Trmt1l</i>        | chr1:151428647-151458182 | 28.8991  | 27.0651  | -0.0946 | 0.167289 |
| <i>Glul</i>          | chr1:153899943-153909723 | 30.3393  | 31.9980  | 0.0768  | 0.454091 |
| <i>Gm10521</i>       | chr1:171895663-171898237 | 4.0389   | 4.3978   | 0.1228  | 0.329990 |
| <i>Gm23153</i>       | chr1:190482871-190483157 | 4.5254   | 5.9869   | 0.4038  | 0.411042 |
| <i>Gm16897</i>       | chr1:194955758-194976959 | 0.4702   | 0.6041   | 0.3616  | 0.376370 |
| <i>Cul2</i>          | chr18:3382987-3436377    | 12.8415  | 13.3534  | 0.0564  | 0.243692 |
| <i>C030005K06Rik</i> | chr18:50042729-50053844  | 2.1938   | 1.8963   | -0.2103 | 0.318557 |
| <i>Seh1l</i>         | chr18:67774875-67795461  | 24.8117  | 25.7770  | 0.0551  | 0.330509 |
| <i>Ska1</i>          | chr18:74195298-74207818  | 0.5039   | 0.6353   | 0.3343  | 0.421463 |
| <i>Atp9b</i>         | chr18:80734142-80934058  | 29.6981  | 27.8378  | -0.0933 | 0.222193 |
| <i>Sec61a2</i>       | chr2:5870986-5895432     | 4.1258   | 4.4690   | 0.1153  | 0.453042 |
| <i>Spopl</i>         | chr2:23506219-23572106   | 14.2062  | 14.9302  | 0.0717  | 0.441704 |
| <i>Fam69b</i>        | chr2:26628456-26636497   | 2.2089   | 1.8853   | -0.2286 | 0.355507 |
| <i>Surf6</i>         | chr2:26888627-26902879   | 20.6488  | 19.3085  | -0.0968 | 0.132235 |
| <i>Surf4</i>         | chr2:26920039-26933928   | 53.8572  | 51.0674  | -0.0767 | 0.013636 |
| <i>Cercam</i>        | chr2:29869163-29882840   | 1.8773   | 2.1105   | 0.1689  | 0.435826 |
| <i>Gm11084</i>       | chr2:72971547-72986716   | 12.4493  | 16.6637  | 0.4207  | 0.364303 |
| <i>Inafm2</i>        | chr2:118745757-118748810 | 5.7322   | 6.1097   | 0.0920  | 0.259568 |
| <i>Gm26899</i>       | chr2:120532903-120539846 | 15.4820  | 16.1810  | 0.0637  | 0.313709 |
| <i>Snord57</i>       | chr2:130278015-130278087 | 25.3084  | 19.7870  | -0.3551 | 0.242661 |
| <i>Crls1</i>         | chr2:132846665-132866785 | 10.6518  | 9.5379   | -0.1594 | 0.364516 |
| <i>Gm14167</i>       | chr2:151540730-151542348 | 1.7192   | 2.4301   | 0.4993  | 0.401111 |
| <i>Gm14239</i>       | chr2:155459500-155460892 | 3.5434   | 4.1173   | 0.2166  | 0.025372 |
| <i>Cse1l</i>         | chr2:166906039-166946389 | 24.7078  | 22.9020  | -0.1095 | 0.268796 |
| <i>Gm14305</i>       | chr2:176708327-176721813 | 1.1763   | 0.9881   | -0.2515 | 0.017570 |
| <i>D3Ertd254e</i>    | chr3:36159521-36170335   | 3.1583   | 2.8907   | -0.1277 | 0.159534 |
| <i>Ndufc1</i>        | chr3:51404676-51408988   | 8.8852   | 7.7984   | -0.1882 | 0.368489 |
| <i>Strip1</i>        | chr3:107612531-107631710 | 22.5628  | 21.1587  | -0.0927 | 0.128917 |
| <i>Gbp2</i>          | chr3:142620601-142638008 | 101.1066 | 108.8880 | 0.1070  | 0.505913 |
| <i>Ssx2ip</i>        | chr3:146404641-146440139 | 2.5405   | 2.7642   | 0.1218  | 0.344811 |
| <i>Dctn3</i>         | chr4:41714797-41723170   | 28.7544  | 30.6859  | 0.0938  | 0.442690 |
| <i>Tomm5</i>         | chr4:45105207-45108114   | 13.4818  | 11.8095  | -0.1911 | 0.332407 |
| <i>Rnf20</i>         | chr4:49632005-49656887   | 32.7889  | 30.5880  | -0.1002 | 0.232512 |
| <i>Acer2</i>         | chr4:86874395-86934822   | 0.9415   | 1.0297   | 0.1291  | 0.073126 |
| <i>Cpt2</i>          | chr4:107903980-107923610 | 4.3552   | 4.7242   | 0.1173  | 0.369157 |
| <i>Atpaf1</i>        | chr4:115784811-115818828 | 1.6834   | 1.8916   | 0.1682  | 0.240966 |
| <i>Elov1l</i>        | chr4:118428092-118432953 | 15.5521  | 14.3995  | -0.1111 | 0.217511 |
| <i>Cap1</i>          | chr4:122859046-122886056 | 194.9950 | 202.8508 | 0.0570  | 0.426509 |
| <i>Clspn</i>         | chr4:126556934-126593903 | 1.6843   | 1.8995   | 0.1735  | 0.535701 |
| <i>Arid1a</i>        | chr4:133679007-133756769 | 14.7044  | 15.8851  | 0.1114  | 0.582550 |
| <i>Mthfr</i>         | chr4:148039076-148059551 | 3.6440   | 3.3326   | -0.1289 | 0.244131 |
| <i>Gm22887</i>       | chr5:22534736-22534843   | 6.1015   | 8.3216   | 0.4477  | 0.376343 |
| <i>Ccin</i>          | chr4:43983503-43985533   | 0.4184   | 0.2960   | -0.4992 | 0.228529 |
| <i>Zfp608</i>        | chr18:54888044-54990180  | 0.1005   | 0.1411   | 0.4898  | 0.409050 |
| <i>Cers5</i>         | chr15:99733505-99772885  | 17.0885  | 16.0494  | -0.0905 | 0.121175 |
| <i>Spsb1</i>         | chr4:149896282-149955043 | 2.1168   | 1.8565   | -0.1892 | 0.343133 |
| <i>Gm26835</i>       | chr10:13967023-14007405  | 3.8742   | 4.3813   | 0.1774  | 0.576963 |
| <i>Cdh23</i>         | chr10:60302747-60696490  | 1.5018   | 1.5967   | 0.0885  | 0.444020 |
| <i>Dlg4</i>          | chr11:70017084-70045532  | 1.9086   | 1.6432   | -0.2160 | 0.371879 |
| <i>Pura</i>          | chr18:36281096-36301521  | 12.4190  | 11.5693  | -0.1022 | 0.287997 |
| <i>Wdsub1</i>        | chr2:59852363-59882591   | 1.1068   | 1.2414   | 0.1656  | 0.107304 |
| <i>Ifi44</i>         | chr3:151730921-151749947 | 0.2889   | 0.5596   | 0.9537  | 0.407046 |
| <i>Atxn10</i>        | chr15:85336380-85463836  | 24.1686  | 25.1043  | 0.0548  | 0.279187 |
| <i>Ints12</i>        | chr3:133091839-133110988 | 3.5665   | 3.7994   | 0.0913  | 0.389388 |

|                      |                           |          |          |         |          |
|----------------------|---------------------------|----------|----------|---------|----------|
| <i>Fggy</i>          | chr4:95557506-95926939    | 0.4189   | 0.5034   | 0.2650  | 0.422810 |
| <i>Figl1</i>         | chr11:11787430-11808962   | 2.0582   | 2.3450   | 0.1882  | 0.560784 |
| <i>Mnt</i>           | chr11:74830919-74845725   | 4.2095   | 4.6865   | 0.1548  | 0.536049 |
| <i>Pdia6</i>         | chr12:17266544-17284770   | 25.6505  | 23.8241  | -0.1066 | 0.261189 |
| <i>Pop7</i>          | chr5:137501437-137502518  | 13.6977  | 12.2614  | -0.1598 | 0.330996 |
| <i>Polr1a</i>        | chr6:71909052-71979356    | 22.8476  | 21.4402  | -0.0917 | 0.224917 |
| <i>Rab7</i>          | chr6:87999105-88045270    | 18.6407  | 19.9495  | 0.0979  | 0.499623 |
| <i>Dhx34</i>         | chr7:16197146-16222037    | 8.7375   | 8.0507   | -0.1181 | 0.292160 |
| <i>Grik5</i>         | chr7:25009852-25072369    | 0.5334   | 0.6345   | 0.2506  | 0.233976 |
| <i>Timm10b</i>       | chr7:105640055-105655748  | 12.9465  | 11.9972  | -0.1099 | 0.225041 |
| <i>Fam53b</i>        | chr7:132712081-132813886  | 17.8034  | 16.6026  | -0.1007 | 0.284551 |
| <i>Ddx60</i>         | chr8:61928086-62037701    | 14.9214  | 16.4384  | 0.1397  | 0.605468 |
| <i>Pskh1</i>         | chr8:105900440-105931778  | 14.8840  | 15.8872  | 0.0941  | 0.505758 |
| <i>Gm17571</i>       | chr9:13444033-13446753    | 11.5052  | 15.6334  | 0.4423  | 0.440289 |
| <i>Ccpg1</i>         | chr9:72985428-73016340    | 23.2036  | 21.7784  | -0.0915 | 0.135193 |
| <i>Tex264</i>        | chr9:106658746-106685948  | 19.9920  | 20.8931  | 0.0636  | 0.362849 |
| <i>Piga</i>          | chrX:164419792-164433916  | 11.1888  | 11.7179  | 0.0667  | 0.436389 |
| <i>Gm17066</i>       | chr14:105109389-105114676 | 21.0729  | 22.8292  | 0.1155  | 0.517467 |
| <i>Fkbp1</i>         | chr17:34644763-34646324   | 3.5274   | 3.9585   | 0.1664  | 0.206125 |
| <i>Tnks2</i>         | chr19:36834231-36893477   | 48.2089  | 45.3326  | -0.0888 | 0.174534 |
| <i>Noc3l</i>         | chr19:38788127-38819237   | 14.3762  | 14.9637  | 0.0578  | 0.293536 |
| <i>Tmem38b</i>       | chr4:53826044-53862019    | 0.8151   | 0.6758   | -0.2703 | 0.221622 |
| <i>Ubr4</i>          | chr4:139352608-139489588  | 29.7174  | 27.1380  | -0.1310 | 0.424114 |
| <i>Gm26779</i>       | chr5:109886230-109891137  | 8.8539   | 7.5189   | -0.2358 | 0.302455 |
| <i>Dos</i>           | chr10:80130450-80140835   | 2.8121   | 3.1245   | 0.1520  | 0.513321 |
| <i>Gm13546</i>       | chr2:58164000-58177063    | 0.9306   | 1.1680   | 0.3278  | 0.331685 |
| <i>Cenpw</i>         | chr10:30196010-30200540   | 2.4308   | 2.0340   | -0.2571 | 0.264009 |
| <i>Sco1</i>          | chr11:67052669-67067070   | 5.6776   | 6.0296   | 0.0868  | 0.375296 |
| <i>Skap1</i>         | chr11:96464592-96759130   | 52.5475  | 54.2002  | 0.0447  | 0.374969 |
| <i>Tubb3</i>         | chr8:123411423-123422015  | 1.8577   | 1.5415   | -0.2692 | 0.327120 |
| <i>Zfp599</i>        | chr9:22247429-22259895    | 3.9572   | 4.2207   | 0.0930  | 0.253865 |
| <i>Fam162a</i>       | chr16:36043843-36071515   | 36.1660  | 32.4269  | -0.1574 | 0.372970 |
| <i>Psen2</i>         | chr1:180227003-180263438  | 11.5580  | 10.6318  | -0.1205 | 0.327292 |
| <i>Gm13776</i>       | chr2:91716158-91717419    | 0.5848   | 0.8232   | 0.4932  | 0.415162 |
| <i>Ppil4</i>         | chr10:7792890-7823135     | 26.3556  | 27.1807  | 0.0445  | 0.263655 |
| <i>Mrpl55</i>        | chr11:59202485-59206134   | 12.1191  | 13.0071  | 0.1020  | 0.263236 |
| <i>Gm15927</i>       | chr7:3632113-3644887      | 7.6695   | 6.9476   | -0.1426 | 0.197924 |
| <i>Liph-ps2</i>      | chrX:13217922-13218650    | 1.3367   | 1.7369   | 0.3778  | 0.346795 |
| <i>Zbtb14</i>        | chr17:69383049-69390750   | 7.0980   | 6.5211   | -0.1223 | 0.233264 |
| <i>Mcm3</i>          | chr1:20802973-20820278    | 30.4696  | 31.7569  | 0.0597  | 0.493284 |
| <i>Sgpp2</i>         | chr1:78310345-78420286    | 1.5337   | 1.7055   | 0.1532  | 0.407445 |
| <i>Gm21972</i>       | chr1:86133636-86162788    | 18.9619  | 20.3857  | 0.1045  | 0.321838 |
| <i>Disp1</i>         | chr1:183086263-183221529  | 3.9464   | 4.2060   | 0.0919  | 0.390776 |
| <i>Elf3</i>          | chr2:121439009-121444278  | 0.4927   | 0.6393   | 0.3756  | 0.440961 |
| <i>Mrps5</i>         | chr2:127587221-127606829  | 7.6131   | 6.8504   | -0.1523 | 0.435255 |
| <i>Itpa</i>          | chr2:130667609-130681614  | 6.8926   | 6.1204   | -0.1714 | 0.340000 |
| <i>Mecr</i>          | chr4:131843469-131867786  | 7.2121   | 6.4971   | -0.1506 | 0.371859 |
| <i>Dcps</i>          | chr9:35124407-35176061    | 32.6160  | 34.1720  | 0.0672  | 0.386730 |
| <i>Arl13b</i>        | chr16:62793684-62847040   | 4.8462   | 5.0988   | 0.0733  | 0.212970 |
| <i>Plekhh3</i>       | chr1:64785982-64956824    | 2.1907   | 2.4387   | 0.1547  | 0.571791 |
| <i>Atad3a</i>        | chr4:155740640-155761093  | 18.1881  | 17.0242  | -0.0954 | 0.192782 |
| <i>Pfdn2</i>         | chr1:171345669-171359254  | 4.2257   | 4.6592   | 0.1409  | 0.382545 |
| <i>Coro2a</i>        | chr4:46536936-46602202    | 5.1960   | 5.4539   | 0.0699  | 0.411746 |
| <i>Zfp869</i>        | chr8:69706331-69710724    | 33.9669  | 35.9087  | 0.0802  | 0.452170 |
| <i>Itga10</i>        | chr3:96645583-96664519    | 0.7728   | 0.6476   | -0.2551 | 0.348429 |
| <i>Gm17455</i>       | chr10:60399725-60403556   | 1.4231   | 1.0069   | -0.4991 | 0.352179 |
| <i>Gm26710</i>       | chr10:80578646-80580677   | 0.6369   | 0.7965   | 0.3226  | 0.183304 |
| <i>A730071L15Rik</i> | chr11:6200028-6201643     | 3.7534   | 3.2873   | -0.1913 | 0.176022 |
| <i>Stk10</i>         | chr11:32533304-32624587   | 106.3646 | 100.5153 | -0.0816 | 0.181453 |
| <i>Tmem11</i>        | chr11:60864451-60879272   | 13.0872  | 14.3093  | 0.1288  | 0.510002 |
| <i>Tnk1</i>          | chr11:69851004-69858730   | 0.4769   | 0.3674   | -0.3765 | 0.283010 |
| <i>Phf23</i>         | chr11:69995776-70000009   | 22.4975  | 20.8594  | -0.1091 | 0.244121 |
| <i>Cxcl16</i>        | chr11:70453982-70459984   | 1.0723   | 0.9082   | -0.2395 | 0.089805 |
| <i>Cpd</i>           | chr11:76778423-76847018   | 0.2632   | 0.3123   | 0.2466  | 0.326623 |
| <i>Z610507B11Rik</i> | chr11:78261751-78290623   | 38.5140  | 36.5191  | -0.0767 | 0.136470 |
| <i>Synrg</i>         | chr11:83964427-84044578   | 13.0581  | 12.1462  | -0.1044 | 0.305257 |
| <i>Nme1</i>          | chr11:93956978-93968521   | 26.5668  | 24.0011  | -0.1465 | 0.402370 |
| <i>Stat5a</i>        | chr11:100859350-100885169 | 11.8462  | 12.3426  | 0.0592  | 0.441046 |
| <i>Psmc3ip</i>       | chr11:101091822-101095436 | 9.6003   | 10.1993  | 0.0873  | 0.223164 |
| <i>A732487G21Rik</i> | chr12:86290760-86306006   | 6.1632   | 6.5680   | 0.0918  | 0.285890 |
| <i>Cinp</i>          | chr12:110872609-110889145 | 11.1607  | 10.3304  | -0.1115 | 0.033011 |

|                      |                           |           |           |         |          |
|----------------------|---------------------------|-----------|-----------|---------|----------|
| <i>Mta1</i>          | chr12:113098277-113137206 | 19.7974   | 18.3533   | -0.1093 | 0.305320 |
| <i>Gm26735</i>       | chr13:28943047-28951671   | 6.4247    | 7.1195    | 0.1481  | 0.548937 |
| <i>2700038G22Rik</i> | chr5:23850596-23854924    | 5.5298    | 4.8497    | -0.1893 | 0.261040 |
| <i>Oas1a</i>         | chr5:120896255-120907521  | 3.7695    | 5.3019    | 0.4922  | 0.418832 |
| <i>Gm14540</i>       | chr6:33038467-33043222    | 1.5478    | 1.7711    | 0.1945  | 0.447444 |
| <i>Arhgef5</i>       | chr6:43265581-43289320    | 0.2161    | 0.2514    | 0.2182  | 0.032732 |
| <i>Nfe2l3</i>        | chr6:51432669-51458768    | 8.8374    | 7.9522    | -0.1523 | 0.391472 |
| <i>Tsen2</i>         | chr6:115544663-115578350  | 2.0312    | 1.8364    | -0.1455 | 0.214299 |
| <i>Gm17216</i>       | chr6:148213366-148214573  | 6.4505    | 7.2049    | 0.1596  | 0.288574 |
| <i>Gm20512</i>       | chr7:19715015-19721731    | 6.4426    | 5.3766    | -0.2609 | 0.326688 |
| <i>Ldha</i>          | chr7:46841474-46855627    | 90.9798   | 83.8008   | -0.1186 | 0.308059 |
| <i>Far1os</i>        | chr7:113530488-113564987  | 6.8538    | 5.7297    | -0.2585 | 0.505183 |
| <i>lfitm5</i>        | chr7:140948962-140950239  | 0.8987    | 1.2841    | 0.5148  | 0.455026 |
| <i>lck</i>           | chr9:78109191-78172107    | 1.2832    | 1.3836    | 0.1086  | 0.378780 |
| <i>Mecp2</i>         | chrX:74026591-74135363    | 7.2979    | 7.6317    | 0.0645  | 0.501499 |
| <i>Tmsb4x</i>        | chrX:167207092-167209315  | 1450.0196 | 1233.4939 | -0.2333 | 0.366969 |
| <i>Exosc4</i>        | chr15:76327396-76330677   | 14.4598   | 13.1330   | -0.1388 | 0.336306 |
| <i>Gpt</i>           | chr15:76696763-76699674   | 3.8200    | 3.3212    | -0.2019 | 0.312057 |
| <i>Gcat</i>          | chr15:79030873-79043558   | 0.2158    | 0.3026    | 0.4879  | 0.552904 |
| <i>5031439G07Rik</i> | chr15:84943935-84988551   | 2.5482    | 2.3268    | -0.1312 | 0.292421 |
| <i>Gm16409</i>       | chr14:73796540-73797290   | 2.1762    | 2.7091    | 0.3160  | 0.430938 |
| <i>Mir18</i>         | chr14:115043850-115043946 | 11.0001   | 8.2013    | -0.4236 | 0.241529 |
| <i>Gm7162</i>        | chr17:12819818-12820842   | 1.5231    | 1.1980    | -0.3465 | 0.200242 |
| <i>Kremen2</i>       | chr17:23741199-23745829   | 1.1835    | 1.3843    | 0.2261  | 0.339452 |
| <i>Rrp1b</i>         | chr17:32036099-32062865   | 10.0241   | 10.4891   | 0.0654  | 0.522129 |
| <i>Cenpq</i>         | chr17:40923050-40935047   | 17.7888   | 18.6126   | 0.0653  | 0.428864 |
| <i>Zfp959</i>        | chr17:55892183-55898584   | 15.5996   | 14.0708   | -0.1488 | 0.369279 |
| <i>Gm17133</i>       | chr17:64748849-64754096   | 12.3287   | 9.8813    | -0.3193 | 0.459703 |
| <i>Smchd1</i>        | chr17:71344488-71475343   | 36.4241   | 38.1176   | 0.0656  | 0.516219 |
| <i>Lrpprc</i>        | chr17:84705246-84790789   | 21.5350   | 20.1797   | -0.0938 | 0.203497 |
| <i>Tmem41a</i>       | chr16:21934326-21947552   | 4.5594    | 5.0844    | 0.1572  | 0.352913 |
| <i>D930030I03Rik</i> | chr16:38451981-38453493   | 3.0398    | 3.5328    | 0.2168  | 0.267258 |
| <i>Cggbp1</i>        | chr16:64851995-64859507   | 54.7708   | 51.5378   | -0.0878 | 0.162922 |
| <i>Tcirg1</i>        | chr19:3896049-3907133     | 14.9106   | 13.9265   | -0.0985 | 0.220100 |
| <i>Sptbn2</i>        | chr19:4711207-4752353     | 0.1287    | 0.1624    | 0.3355  | 0.252326 |
| <i>Gm6293</i>        | chr19:5415564-5415759     | 6.1133    | 7.6687    | 0.3270  | 0.316505 |
| <i>Rcor2</i>         | chr19:7267324-7275225     | 0.5857    | 0.7021    | 0.2617  | 0.275357 |
| <i>Psat1</i>         | chr19:15904677-15947337   | 11.0300   | 11.4863   | 0.0585  | 0.202189 |
| <i>4931403E22Rik</i> | chr19:26768800-26823907   | 4.6752    | 3.8534    | -0.2789 | 0.304706 |
| <i>Ablim1</i>        | chr19:57032732-57314919   | 112.5758  | 115.7798  | 0.0405  | 0.493738 |
| <i>Tex30</i>         | chr1:44086612-44102441    | 8.7273    | 7.8572    | -0.1515 | 0.328687 |
| <i>Sp140</i>         | chr1:85600377-85645037    | 16.3110   | 16.9668   | 0.0569  | 0.295862 |
| <i>Yod1</i>          | chr1:130717326-130722055  | 9.1230    | 9.5416    | 0.0647  | 0.314061 |
| <i>lkbke</i>         | chr1:131254342-131279606  | 40.4944   | 38.2070   | -0.0839 | 0.199686 |
| <i>Teddm2</i>        | chr1:153849541-153900208  | 2.1811    | 2.4709    | 0.1800  | 0.366303 |
| <i>Zbtb18</i>        | chr1:177444660-177450760  | 7.5143    | 7.8279    | 0.0590  | 0.254330 |
| <i>1700056E22Rik</i> | chr1:184033031-184033998  | 3.6786    | 3.1382    | -0.2292 | 0.105168 |
| <i>Epc1</i>          | chr18:6435950-6516108     | 39.9151   | 37.6796   | -0.0832 | 0.080557 |
| <i>E230025N22Rik</i> | chr18:36684922-36695925   | 0.4588    | 0.3289    | -0.4801 | 0.338667 |
| <i>Myo5b</i>         | chr18:74440935-74771493   | 0.2776    | 0.2306    | -0.2677 | 0.157133 |
| <i>P2rx3</i>         | chr2:84998582-85037462    | 1.0213    | 0.8446    | -0.2741 | 0.230932 |
| <i>Cops2</i>         | chr2:125830303-125859139  | 32.7154   | 34.5121   | 0.0771  | 0.481558 |
| <i>Smox</i>          | chr2:131491495-131525922  | 2.3579    | 2.0626    | -0.1930 | 0.369531 |
| <i>Glpr2</i>         | chr4:43957400-43979118    | 122.6284  | 114.5711  | -0.0980 | 0.218744 |
| <i>Mrpl50</i>        | chr4:49512595-49521093    | 12.8908   | 13.7701   | 0.0952  | 0.469195 |
| <i>NA</i>            | chr4:108622928-108625216  | 11.1673   | 11.8858   | 0.0900  | 0.455787 |
| <i>Prdx1</i>         | chr4:116685543-116700822  | 25.8653   | 23.5783   | -0.1336 | 0.364430 |
| <i>Ticam2</i>        | chr18:46559154-46574533   | 0.2479    | 0.1713    | -0.5333 | 0.382023 |
| <i>Ajf1</i>          | chr17:35170990-35176068   | 0.4064    | 0.5410    | 0.4128  | 0.211368 |
| <i>NA</i>            | chr10:5020202-5069063     | 20.6057   | 18.6408   | -0.1446 | 0.425544 |
| <i>Vps26a</i>        | chr10:62454842-62486805   | 22.0887   | 23.3146   | 0.0779  | 0.477648 |
| <i>Mbd6</i>          | chr10:127281955-127289018 | 2.4202    | 2.6868    | 0.1508  | 0.503963 |
| <i>Hmmr</i>          | chr11:40701394-40733422   | 1.5556    | 1.8078    | 0.2167  | 0.593494 |
| <i>Wrap53</i>        | chr11:69561757-69580255   | 10.7281   | 9.8677    | -0.1206 | 0.153425 |
| <i>Tmem199</i>       | chr11:78507054-78512172   | 14.6450   | 13.4032   | -0.1278 | 0.259102 |
| <i>Cbx1</i>          | chr11:96789126-96808640   | 16.3216   | 15.0850   | -0.1137 | 0.281282 |
| <i>Gm11613</i>       | chr11:97644183-97660367   | 3.7145    | 3.2703    | -0.1838 | 0.284861 |
| <i>Pitpnc1</i>       | chr11:107207891-107470699 | 31.0959   | 31.8820   | 0.0360  | 0.289857 |
| <i>Nt5c</i>          | chr11:115490419-115491862 | 96.8880   | 104.0870  | 0.1034  | 0.539384 |
| <i>Gm11748</i>       | chr11:118476469-118479458 | 1.7216    | 1.3939    | -0.3047 | 0.346820 |
| <i>Gpr22</i>         | chr12:31706866-31713947   | 1.4288    | 1.6866    | 0.2393  | 0.584776 |

|                      |                           |          |          |         |          |
|----------------------|---------------------------|----------|----------|---------|----------|
| <i>Sptb</i>          | chr12:76580487-76710547   | 0.0906   | 0.1118   | 0.3037  | 0.080774 |
| <i>Eij5</i>          | chr12:111538100-111546753 | 83.1202  | 77.9530  | -0.0926 | 0.228781 |
| <i>Zkscan3</i>       | chr13:21387012-21402755   | 18.2909  | 17.2150  | -0.0875 | 0.190493 |
| <i>Ranbp9</i>        | chr13:43402672-43480973   | 45.1649  | 42.2003  | -0.0979 | 0.279977 |
| <i>Nhlrc1</i>        | chr13:47012557-47014850   | 0.7597   | 0.9272   | 0.2874  | 0.379056 |
| <i>Agtpbp1</i>       | chr13:59449536-59585227   | 6.7025   | 6.9221   | 0.0465  | 0.294718 |
| <i>Col4a3bp</i>      | chr13:96542617-96640167   | 21.8932  | 20.3129  | -0.1081 | 0.326750 |
| <i>Tmem60</i>        | chr5:20882190-20886870    | 12.5200  | 11.0783  | -0.1765 | 0.383399 |
| <i>Rpl17-ps5</i>     | chr5:22612590-22613217    | 4.9508   | 3.9725   | -0.3176 | 0.484835 |
| <i>Srpk2</i>         | chr5:23503355-23616571    | 28.8009  | 29.6524  | 0.0420  | 0.278384 |
| <i>Ube3c</i>         | chr5:29569241-29676077    | 21.2691  | 19.8132  | -0.1023 | 0.268680 |
| <i>Cpeb2</i>         | chr5:43233462-43289724    | 1.2609   | 1.4210   | 0.1725  | 0.526913 |
| <i>Gbp11</i>         | chr5:105323041-105346472  | 5.2518   | 5.6844   | 0.1142  | 0.457952 |
| <i>Acad10</i>        | chr5:121621025-121660514  | 2.7393   | 2.4965   | -0.1339 | 0.228519 |
| <i>Anapc5</i>        | chr5:122787468-122821339  | 124.5012 | 116.9383 | -0.0904 | 0.213545 |
| <i>Mrps17</i>        | chr5:129715496-129718875  | 25.4337  | 26.5084  | 0.0597  | 0.362791 |
| <i>Clip2</i>         | chr5:134489385-134552434  | 1.3258   | 1.1524   | -0.2022 | 0.301574 |
| <i>Orai2</i>         | chr5:136147463-136170656  | 54.8147  | 51.3595  | -0.0939 | 0.221284 |
| <i>Gm16121</i>       | chr5:140101198-140107591  | 1.0519   | 0.8514   | -0.3051 | 0.341545 |
| <i>Daglb</i>         | chr5:143464492-143504442  | 2.9882   | 2.7230   | -0.1341 | 0.208029 |
| <i>Rpa3</i>          | chr6:8255935-8259173      | 12.5623  | 11.1120  | -0.1770 | 0.386419 |
| <i>Slc35b4</i>       | chr6:34153379-34177111    | 5.0979   | 4.7709   | -0.0956 | 0.145671 |
| <i>Trbj1-3</i>       | chr6:41534322-41534376    | 175.5441 | 156.2940 | -0.1676 | 0.254212 |
| <i>Reep1</i>         | chr6:71707560-71810710    | 0.9376   | 0.7928   | -0.2420 | 0.317973 |
| <i>Tmsb10</i>        | chr6:72957346-72958748    | 77.5561  | 68.4481  | -0.1802 | 0.466506 |
| <i>Leng8</i>         | chr7:4137038-4148173      | 34.3464  | 36.1940  | 0.0756  | 0.559805 |
| <i>Il16</i>          | chr7:83642847-83745726    | 93.8890  | 88.7584  | -0.0811 | 0.127506 |
| <i>C230038L03Rik</i> | chr7:96947577-96951886    | 0.6837   | 0.5516   | -0.3098 | 0.177306 |
| <i>Alg8</i>          | chr7:97371605-97392153    | 5.2807   | 4.7502   | -0.1528 | 0.300149 |
| <i>Dnajb13</i>       | chr7:100503017-100514960  | 5.0331   | 4.4400   | -0.1809 | 0.259679 |
| <i>D430042O09Rik</i> | chr7:125707914-125874793  | 4.5105   | 4.1829   | -0.1088 | 0.160158 |
| <i>E430018J23Rik</i> | chr7:127389672-127393629  | 5.1960   | 5.5291   | 0.0896  | 0.363957 |
| <i>Rnh1</i>          | chr7:141160327-141172851  | 22.2089  | 20.5446  | -0.1124 | 0.276717 |
| <i>Nek3</i>          | chr8:22128282-22166435    | 3.9036   | 4.2277   | 0.1151  | 0.217463 |
| <i>Dand5</i>         | chr8:84815404-84822823    | 4.3329   | 4.8425   | 0.1604  | 0.426613 |
| <i>Mkl1</i>          | chr8:111311796-111338177  | 0.6081   | 0.8034   | 0.4018  | 0.515371 |
| <i>Snord68</i>       | chr8:123103037-123103123  | 19.4448  | 15.2637  | -0.3493 | 0.218679 |
| <i>Gm16163</i>       | chr8:124831697-124863703  | 11.3518  | 10.1674  | -0.1590 | 0.320758 |
| <i>Gm26759</i>       | chr8:126566969-126590988  | 37.3495  | 34.8991  | -0.0979 | 0.144828 |
| <i>Raver1</i>        | chr9:21074167-21091988    | 16.1181  | 17.1510  | 0.0896  | 0.526367 |
| <i>Arih1</i>         | chr9:59388257-59486618    | 30.8674  | 31.9062  | 0.0478  | 0.433572 |
| <i>Myo5a</i>         | chr9:75071014-75223688    | 1.8738   | 2.0236   | 0.1109  | 0.542932 |
| <i>D030055H07Rik</i> | chr9:106148686-106160201  | 2.6747   | 2.4002   | -0.1562 | 0.295204 |
| <i>Usp19</i>         | chr9:108490675-108502333  | 32.0294  | 30.1261  | -0.0884 | 0.242075 |
| <i>NA</i>            | chr9:108648839-108650953  | 1.2628   | 1.4941   | 0.2427  | 0.435977 |
| <i>Fundc1</i>        | chrX:17556563-17572325    | 10.1205  | 10.8410  | 0.0992  | 0.476188 |
| <i>Gm15938</i>       | chr15:5175084-5185723     | 1.6115   | 2.0155   | 0.3227  | 0.275717 |
| <i>Tatdn1</i>        | chr15:58890152-58933730   | 8.9650   | 9.5552   | 0.0920  | 0.164479 |
| <i>Gm2895</i>        | chr15:66969322-67013039   | 0.2026   | 0.2745   | 0.4385  | 0.379724 |
| <i>Apol7e</i>        | chr15:77698888-77719288   | 31.7750  | 29.6745  | -0.0987 | 0.227479 |
| <i>Nptxr</i>         | chr15:79786351-79834333   | 0.9933   | 0.8576   | -0.2119 | 0.326883 |
| <i>Till1</i>         | chr15:83483771-83510893   | 1.2724   | 1.0755   | -0.2425 | 0.313510 |
| <i>Ddx23</i>         | chr15:98645133-98662889   | 27.7707  | 25.9099  | -0.1001 | 0.227196 |
| <i>Rpl21-ps4</i>     | chr14:11227551-11227992   | 2.5084   | 3.1515   | 0.3293  | 0.279749 |
| <i>Sh3bp5</i>        | chr14:31359879-31436078   | 23.1898  | 24.8405  | 0.0992  | 0.546948 |
| <i>Ghitm</i>         | chr14:37120443-37135322   | 51.3166  | 47.5815  | -0.1090 | 0.291620 |
| <i>Gnpnat1</i>       | chr14:45376333-45388802   | 6.9313   | 6.3211   | -0.1330 | 0.228687 |
| <i>Gm5464</i>        | chr14:66868849-66871005   | 1.1055   | 1.3170   | 0.2525  | 0.345316 |
| <i>Tmem204</i>       | chr17:25057701-25081181   | 0.5904   | 0.7759   | 0.3942  | 0.469220 |
| <i>Stub1</i>         | chr17:25830635-25833361   | 46.3772  | 43.1205  | -0.1050 | 0.243002 |
| <i>Mea1</i>          | chr17:46681136-46683105   | 35.0191  | 38.1844  | 0.1248  | 0.530810 |
| <i>Trerf1</i>        | chr17:47140941-47359458   | 1.2280   | 1.4118   | 0.2012  | 0.488926 |
| <i>Ankrd12</i>       | chr17:65967500-66077089   | 14.8718  | 15.5818  | 0.0673  | 0.456835 |
| <i>Glyr1</i>         | chr16:5013905-5049910     | 59.4565  | 61.1856  | 0.0414  | 0.280116 |
| <i>Mettl22</i>       | chr16:8470787-8490684     | 6.5723   | 7.0214   | 0.0954  | 0.422079 |
| <i>Mcm4</i>          | chr16:15623896-15637400   | 33.1404  | 34.1705  | 0.0442  | 0.453327 |
| <i>Ifnar1</i>        | chr16:91485237-91507441   | 46.2906  | 43.8165  | -0.0792 | 0.137133 |
| <i>Pacs1</i>         | chr19:5133687-5273119     | 11.8899  | 12.8118  | 0.1077  | 0.575180 |
| <i>Cdca5</i>         | chr19:6084982-6091777     | 1.6879   | 1.3748   | -0.2960 | 0.419442 |
| <i>Cpsf7</i>         | chr19:10525243-10547735   | 28.3477  | 29.4122  | 0.0532  | 0.488244 |
| <i>Pecr</i>          | chr1:72259166-72284314    | 1.5792   | 1.8458   | 0.2251  | 0.351369 |

|                      |                           |           |           |         |          |
|----------------------|---------------------------|-----------|-----------|---------|----------|
| <i>Dnpep</i>         | chr1:75307895-75317637    | 12.9884   | 12.0053   | -0.1136 | 0.221127 |
| <i>Uhmk1</i>         | chr1:170193419-170215397  | 32.6365   | 30.7149   | -0.0875 | 0.206264 |
| <i>Gm26620</i>       | chr1:170885064-170885881  | 3.0951    | 2.5254    | -0.2935 | 0.262536 |
| <i>Chml</i>          | chr1:175686487-175688353  | 4.4100    | 3.9144    | -0.1720 | 0.239854 |
| <i>Akt3</i>          | chr1:177020072-177258203  | 18.8657   | 19.8163   | 0.0709  | 0.457036 |
| <i>Capn2</i>         | chr1:182467255-182517495  | 28.0298   | 29.2808   | 0.0630  | 0.514222 |
| <i>Ss18</i>          | chr18:14624197-14682914   | 39.4550   | 40.7134   | 0.0453  | 0.354128 |
| <i>Gm15336</i>       | chr18:39246246-39302690   | 1.5903    | 1.9235    | 0.2744  | 0.509603 |
| <i>Angptl2</i>       | chr2:33216068-33247717    | 0.7945    | 0.6516    | -0.2860 | 0.501513 |
| <i>Mapk8ip1</i>      | chr2:92383675-92401263    | 0.5172    | 0.4153    | -0.3165 | 0.347059 |
| <i>Bahd1</i>         | chr2:118900376-118924528  | 7.6763    | 6.9642    | -0.1404 | 0.401966 |
| <i>9430008C03Rik</i> | chr2:158355306-158361580  | 17.0755   | 15.9088   | -0.1021 | 0.290905 |
| <i>Zfand1</i>        | chr3:10339952-10351317    | 2.9983    | 3.1770    | 0.0835  | 0.308214 |
| <i>Sh3d19</i>        | chr3:85971108-86130526    | 0.3804    | 0.3161    | -0.2670 | 0.304070 |
| <i>Dpm3</i>          | chr3:89259357-89267079    | 21.8214   | 24.5305   | 0.1688  | 0.551013 |
| <i>Rps10-ps1</i>     | chr3:95622277-95622775    | 25.7335   | 22.2090   | -0.2125 | 0.444941 |
| <i>Tspan2</i>        | chr3:102734528-102772292  | 0.3574    | 0.4330    | 0.2769  | 0.338866 |
| <i>Usp53</i>         | chr3:122933600-122984447  | 17.1904   | 17.9042   | 0.0587  | 0.385177 |
| <i>Pnrc1</i>         | chr4:33245422-33290163    | 114.4051  | 120.4830  | 0.0747  | 0.531081 |
| <i>Slc31a2</i>       | chr4:62262561-62298411    | 7.8378    | 7.0747    | -0.1478 | 0.303141 |
| <i>Akna</i>          | chr4:63367124-63403354    | 64.4803   | 59.1775   | -0.1238 | 0.418756 |
| <i>Gm12902</i>       | chr4:123926233-123926555  | 2.6941    | 1.9950    | -0.4334 | 0.098484 |
| <i>Ube4b</i>         | chr4:149328415-149426749  | 10.0054   | 9.3004    | -0.1054 | 0.308778 |
| <i>Tnfrsf25</i>      | chr4:152115933-152120119  | 5.3371    | 4.6885    | -0.1869 | 0.405294 |
| <i>Rpl27a</i>        | chr7:109519146-109522367  | 24.8411   | 22.9549   | -0.1139 | 0.280548 |
| <i>Luc7l2</i>        | chr6:38551333-38609470    | 27.1602   | 28.5641   | 0.0727  | 0.550042 |
| <i>Map4k1</i>        | chr7:28982853-29003279    | 33.3185   | 34.8501   | 0.0648  | 0.507776 |
| <i>1110012L19Rik</i> | chrX:70385876-70389417    | 10.8551   | 9.6254    | -0.1735 | 0.356820 |
| <i>Rbbp5</i>         | chr1:132477366-132505665  | 25.9355   | 26.6892   | 0.0413  | 0.312412 |
| <i>Armc3</i>         | chr2:19199301-19310241    | 0.9551    | 0.7602    | -0.3292 | 0.393148 |
| <i>Dnajc10</i>       | chr2:80315465-80354043    | 25.5293   | 23.5046   | -0.1192 | 0.357809 |
| <i>NA</i>            | chr4:116033906-116053380  | 4.8527    | 4.4077    | -0.1388 | 0.314387 |
| <i>Susd2</i>         | chr10:75636618-75644008   | 0.5101    | 0.4027    | -0.3410 | 0.221993 |
| <i>Tssc1</i>         | chr12:28751827-28867491   | 20.5641   | 18.8595   | -0.1248 | 0.297306 |
| <i>Eif4a1</i>        | chr11:69666935-69672423   | 35.6283   | 36.8054   | 0.0469  | 0.386298 |
| <i>Map4k3</i>        | chr17:80580511-80728093   | 3.8462    | 4.1269    | 0.1016  | 0.450444 |
| <i>Rrp1</i>          | chr10:78400361-78413043   | 89.2125   | 94.6465   | 0.0853  | 0.543776 |
| <i>Dyrk2</i>         | chr10:118859348-118868903 | 41.5509   | 39.0423   | -0.0898 | 0.183069 |
| <i>Gm22442</i>       | chr11:69350517-69350661   | 1398.4608 | 1535.4733 | 0.1348  | 0.595946 |
| <i>Sgsm2</i>         | chr11:74849260-74897060   | 1.4600    | 1.6108    | 0.1417  | 0.502007 |
| <i>Hist1h1b</i>      | chr13:21779882-21780625   | 33.1203   | 41.8042   | 0.3359  | 0.474138 |
| <i>Man2b2</i>        | chr5:36806920-36830653    | 12.6422   | 13.5784   | 0.1031  | 0.542218 |
| <i>Mki67</i>         | chr7:135689787-135716379  | 8.8192    | 11.1858   | 0.3429  | 0.462170 |
| <i>Akap14</i>        | chrX:37150697-37168842    | 0.4531    | 0.5838    | 0.3657  | 0.276482 |
| <i>Stag2</i>         | chrX:42149316-42277185    | 60.4704   | 63.3184   | 0.0664  | 0.498992 |
| <i>Micall1</i>       | chr15:79108971-79136897   | 7.9438    | 7.2950    | -0.1229 | 0.382928 |
| <i>Tmem138</i>       | chr19:10570477-10577362   | 7.0775    | 6.3934    | -0.1466 | 0.164972 |
| <i>Slk</i>           | chr19:47579677-47645246   | 31.6356   | 32.5316   | 0.0403  | 0.396715 |
| <i>Dtd1</i>          | chr2:144599896-144768758  | 10.7776   | 11.4575   | 0.0883  | 0.425638 |
| <i>Gfod2</i>         | chr8:105713853-105758664  | 1.8873    | 1.6388    | -0.2037 | 0.362036 |
| <i>Mtmr3</i>         | chr11:4480867-4594863     | 29.6121   | 28.0365   | -0.0789 | 0.164982 |
| <i>Git1</i>          | chr11:77493561-77507786   | 6.6365    | 6.0464    | -0.1343 | 0.385552 |
| <i>G2e3</i>          | chr12:51348060-51376986   | 10.5665   | 9.7617    | -0.1143 | 0.350795 |
| <i>Lsm4</i>          | chr8:70673247-70678752    | 67.8863   | 73.4945   | 0.1145  | 0.558728 |
| <i>Qprt</i>          | chr7:127107113-127122226  | 5.1956    | 5.5309    | 0.0902  | 0.287201 |
| <i>Apba3</i>         | chr10:81268171-81273246   | 10.0264   | 9.1044    | -0.1392 | 0.340865 |
| <i>Kdm6b</i>         | chr11:69398507-69413675   | 2.6343    | 2.8348    | 0.1058  | 0.498025 |
| <i>Card14</i>        | chr11:119307767-119345375 | 4.0084    | 3.6409    | -0.1387 | 0.313369 |
| <i>Dlst</i>          | chr12:85110832-85134091   | 51.8027   | 53.0376   | 0.0340  | 0.149331 |
| <i>Ccdc102a</i>      | chr8:94902868-94918098    | 12.1656   | 11.1413   | -0.1269 | 0.265931 |
| <i>Cog8</i>          | chr8:107046288-107056689  | 20.5618   | 19.3812   | -0.0853 | 0.076261 |
| <i>NA</i>            | chr15:62217540-62219403   | 0.9163    | 0.6898    | -0.4095 | 0.433788 |
| <i>NA</i>            | chr1:6214611-6215292      | 8.1075    | 6.9637    | -0.2194 | 0.395107 |
| <i>Jtb</i>           | chr3:90231596-90235838    | 43.3785   | 40.3803   | -0.1033 | 0.244033 |
| <i>Gm20479</i>       | chr7:27352648-27357419    | 12.1249   | 13.4335   | 0.1479  | 0.435741 |
| <i>Snx3</i>          | chr10:42502029-42535381   | 39.8200   | 42.6676   | 0.0996  | 0.518724 |
| <i>Prrt2</i>         | chr10:76207221-76237865   | 3.0472    | 2.6439    | -0.2048 | 0.388731 |
| <i>Gm4189</i>        | chr10:127289695-127290788 | 1.5503    | 2.0887    | 0.4300  | 0.312054 |
| <i>Gm25206</i>       | chr10:128084142-128084216 | 24.9995   | 20.0292   | -0.3198 | 0.263829 |
| <i>Tefm</i>          | chr11:80136677-80142175   | 6.5722    | 7.2249    | 0.1366  | 0.502484 |
| <i>Gm26668</i>       | chr11:102863336-103075903 | 2.4061    | 2.1335    | -0.1735 | 0.329914 |

|                      |                           |          |          |         |          |
|----------------------|---------------------------|----------|----------|---------|----------|
| <i>Sf3b6</i>         | chr12:4817607-4827658     | 72.7096  | 78.2476  | 0.1059  | 0.537936 |
| <i>Arid4a</i>        | chr12:71015989-71098592   | 41.3717  | 43.4599  | 0.0710  | 0.532982 |
| <i>Zfyve1</i>        | chr12:83546940-83597147   | 12.9959  | 12.1888  | -0.0925 | 0.120218 |
| <i>AK010878</i>      | chr12:102719974-102757810 | 3.7243   | 3.3753   | -0.1420 | 0.315886 |
| <i>Dhx15</i>         | chr5:52150208-52190519    | 157.2240 | 162.1199 | 0.0442  | 0.392589 |
| <i>Lnx1</i>          | chr5:74592445-74702911    | 2.9911   | 3.2871   | 0.1362  | 0.542400 |
| <i>Gm13842</i>       | chr5:116026410-116029230  | 7.2882   | 6.4870   | -0.1680 | 0.221868 |
| <i>Snora15</i>       | chr5:129794545-129794676  | 14.8754  | 12.0379  | -0.3053 | 0.285277 |
| <i>Trim56</i>        | chr5:137105643-137116209  | 37.7684  | 35.7830  | -0.0779 | 0.111900 |
| <i>Zfp467</i>        | chr6:48427696-48445825    | 0.3163   | 0.3824   | 0.2736  | 0.185547 |
| <i>Il12rb2</i>       | chr6:67291317-67376188    | 4.2437   | 3.7970   | -0.1605 | 0.352104 |
| <i>Ggcx</i>          | chr6:72414307-72430712    | 6.1134   | 5.5581   | -0.1374 | 0.305698 |
| <i>Usp18</i>         | chr6:121245905-121270916  | 24.1423  | 28.8083  | 0.2549  | 0.476527 |
| <i>Snord33</i>       | chr7:45126863-45126947    | 23.1086  | 17.9983  | -0.3606 | 0.354529 |
| <i>Gm16171</i>       | chr7:80907824-80908148    | 4.2550   | 3.2833   | -0.3740 | 0.280895 |
| <i>Numa1</i>         | chr7:10196842-102014959   | 79.7056  | 82.0995  | 0.0427  | 0.499516 |
| <i>Trpc2</i>         | chr7:102065510-102096864  | 6.5078   | 6.1249   | -0.0875 | 0.021982 |
| <i>Slc5a2</i>        | chr7:128265656-128272430  | 2.3832   | 2.6236   | 0.1387  | 0.431791 |
| <i>Zfp930</i>        | chr8:69226342-69228980    | 17.2747  | 15.5421  | -0.1525 | 0.371129 |
| <i>Comp</i>          | chr8:70373547-70382065    | 0.4506   | 0.3242   | -0.4749 | 0.421320 |
| <i>Prkaca</i>        | chr8:83972977-83996445    | 13.0341  | 11.9656  | -0.1234 | 0.317103 |
| <i>Thyn1</i>         | chr9:26999676-27007330    | 42.9856  | 39.8947  | -0.1077 | 0.217947 |
| <i>Nlr1</i>          | chr9:44252712-44268599    | 0.9585   | 1.1044   | 0.2044  | 0.447399 |
| <i>Scamp2</i>        | chr9:57560943-57588797    | 23.7038  | 22.1006  | -0.1010 | 0.259630 |
| <i>Pkm</i>           | chr9:59656367-59679375    | 117.1855 | 122.9630 | 0.0694  | 0.539262 |
| <i>4930429F24Rik</i> | chr9:79793640-79803235    | 1.0894   | 1.3180   | 0.2747  | 0.425883 |
| <i>Rasa2</i>         | chr9:96539299-96631617    | 18.1599  | 16.9908  | -0.0960 | 0.253446 |
| <i>Col7a1</i>        | chr9:108953585-108984875  | 0.2022   | 0.1644   | -0.2992 | 0.263770 |
| <i>Scap</i>          | chr9:110333287-110384946  | 20.1747  | 18.7302  | -0.1072 | 0.357153 |
| <i>Zdhhc9</i>        | chrX:48171968-48208878    | 1.5011   | 1.6530   | 0.1391  | 0.501806 |
| <i>Nhp2l1</i>        | chr15:82041318-82047598   | 5.7045   | 6.1457   | 0.1075  | 0.326390 |
| <i>Tenc1</i>         | chr15:102102987-102116401 | 0.4634   | 0.5481   | 0.2421  | 0.365151 |
| <i>Fbxo34</i>        | chr14:47472560-47531962   | 4.1302   | 3.7377   | -0.1440 | 0.282358 |
| <i>Nudt18</i>        | chr14:70577846-70582571   | 2.4022   | 2.0983   | -0.1952 | 0.362678 |
| <i>Tnfrsf12a</i>     | chr17:23675446-23677449   | 2.7201   | 2.1901   | -0.3127 | 0.370032 |
| <i>Btla</i>          | chr16:45224314-45252895   | 50.4221  | 53.7754  | 0.0929  | 0.569967 |
| <i>Samsn1</i>        | chr16:75858792-76022270   | 9.7013   | 10.2015  | 0.0725  | 0.473330 |
| <i>Slc5a3</i>        | chr16:92058321-92087473   | 4.3175   | 3.9445   | -0.1304 | 0.394316 |
| <i>Vps37c</i>        | chr19:10688814-10714419   | 5.8176   | 6.2547   | 0.1045  | 0.424730 |
| <i>Rpl18-ps1</i>     | chr1:60900897-60901422    | 3.5589   | 4.2375   | 0.2518  | 0.321757 |
| <i>Rnpep</i>         | chr1:135262711-135284084  | 12.2474  | 11.4322  | -0.0994 | 0.159914 |
| <i>Pvrl4</i>         | chr1:171370098-171388598  | 0.3639   | 0.4537   | 0.3180  | 0.388867 |
| <i>F830016B08Rik</i> | chr18:60293379-60303016   | 0.1960   | 0.2956   | 0.5930  | 0.529492 |
| <i>Rbm17</i>         | chr2:11585438-11604153    | 37.2768  | 39.6169  | 0.0878  | 0.524056 |
| <i>Trub2</i>         | chr2:29761223-29788502    | 6.1769   | 6.5089   | 0.0755  | 0.474032 |
| <i>Tspan18</i>       | chr2:93201759-93334505    | 0.2486   | 0.2005   | -0.3099 | 0.257346 |
| <i>Gm27027</i>       | chr2:93956816-93996354    | 9.2306   | 10.3203  | 0.1610  | 0.342090 |
| <i>Dph6</i>          | chr2:114516415-114654964  | 3.7454   | 3.9296   | 0.0693  | 0.330698 |
| <i>Galk2</i>         | chr2:125859108-125984299  | 8.0784   | 7.5169   | -0.1039 | 0.200498 |
| <i>Mynn</i>          | chr3:30602086-30618492    | 14.6372  | 15.2590  | 0.0600  | 0.378144 |
| <i>Creb3l4</i>       | chr3:90237499-90243512    | 0.7217   | 0.5563   | -0.3753 | 0.115323 |
| <i>Otud7b</i>        | chr3:96104526-96161129    | 5.8849   | 5.4795   | -0.1030 | 0.232458 |
| <i>1700123M08Rik</i> | chr4:11966564-11994280    | 0.7658   | 0.9600   | 0.3261  | 0.093632 |
| <i>Coq3</i>          | chr4:21879672-21912162    | 3.4483   | 3.7187   | 0.1089  | 0.374435 |
| <i>Srsf4</i>         | chr4:131873616-131901706  | 18.4314  | 17.1075  | -0.1075 | 0.325249 |
| <i>Nmnat1</i>        | chr4:149467571-149485202  | 2.2244   | 1.9490   | -0.1907 | 0.263315 |
| <i>Mpc1-ps</i>       | chr12:110858069-110858942 | 0.6822   | 0.9438   | 0.4684  | 0.345962 |
| <i>Arhgap27</i>      | chr11:103331496-103363692 | 13.8756  | 12.8344  | -0.1125 | 0.368936 |
| <i>Dcaf7</i>         | chr11:106036871-106059324 | 35.8448  | 33.8714  | -0.0817 | 0.162270 |
| <i>Tm9sf1</i>        | chr14:55635964-55643806   | 15.5923  | 14.5687  | -0.0980 | 0.219192 |
| <i>Gm16151</i>       | chr1:38307901-38311930    | 4.8672   | 5.5703   | 0.1946  | 0.373824 |
| <i>Agpat3</i>        | chr10:78269177-78352489   | 21.0162  | 19.9698  | -0.0737 | 0.033859 |
| <i>Gm17134</i>       | chr10:79863936-79864434   | 31.3287  | 28.3943  | -0.1419 | 0.217916 |
| <i>4930442H23Rik</i> | chr10:81182604-81183849   | 2.3526   | 2.0042   | -0.2312 | 0.051017 |
| <i>Gm16062</i>       | chr11:59810079-59818491   | 23.1114  | 20.9602  | -0.1409 | 0.295912 |
| <i>Tes3-ps</i>       | chr13:49493614-49494819   | 1.8221   | 2.1748   | 0.2553  | 0.365610 |
| <i>Cetn3</i>         | chr13:81783291-81797143   | 49.0369  | 52.3810  | 0.0952  | 0.527064 |
| <i>Apc-ps1</i>       | chr5:76196624-76197094    | 3.0649   | 2.3403   | -0.3892 | 0.342149 |
| <i>Dck</i>           | chr5:88764995-88783281    | 18.1715  | 17.0239  | -0.0941 | 0.176934 |
| <i>Gcc1</i>          | chr6:28416090-28428390    | 12.0028  | 11.2390  | -0.0949 | 0.158653 |
| <i>Srgap3</i>        | chr6:112717970-112947266  | 0.3989   | 0.5641   | 0.4999  | 0.489873 |

|                      |                           |          |          |         |          |
|----------------------|---------------------------|----------|----------|---------|----------|
| <i>Cd37</i>          | chr7:45233631-45239115    | 31.7479  | 32.9094  | 0.0518  | 0.494993 |
| <i>Ing1</i>          | chr8:11556065-11563250    | 18.3956  | 17.0964  | -0.1057 | 0.235150 |
| <i>Dync1li2</i>      | chr8:104417673-104443047  | 18.6562  | 17.4996  | -0.0923 | 0.173375 |
| <i>Dyx1c1Ccp1</i>    | chr9:72958851-73016319    | 25.1470  | 23.6280  | -0.0899 | 0.153702 |
| <i>Gm9159</i>        | chrX:103597770-103598336  | 1.2267   | 1.6683   | 0.4436  | 0.460478 |
| <i>Traj17</i>        | chr14:54201774-54201837   | 46.2948  | 38.3232  | -0.2726 | 0.339193 |
| <i>Clic5</i>         | chr17:44188571-44280168   | 0.2561   | 0.2031   | -0.3341 | 0.132147 |
| <i>Dhx57</i>         | chr17:80238303-80290476   | 19.0595  | 19.6912  | 0.0470  | 0.410850 |
| <i>Gm26626</i>       | chr16:92612813-92620105   | 1.5033   | 1.9129   | 0.3477  | 0.384835 |
| <i>Gm996</i>         | chr2:25575415-25580099    | 0.2285   | 0.1711   | -0.4173 | 0.223493 |
| <i>Tgif2</i>         | chr2:156840076-156855570  | 4.2701   | 3.9063   | -0.1285 | 0.147127 |
| <i>Trmt13</i>        | chr3:116581092-116614587  | 11.3003  | 11.7434  | 0.0555  | 0.361860 |
| <i>Chd7</i>          | chr4:8690405-8867659      | 26.8871  | 25.3854  | -0.0829 | 0.237831 |
| <i>Macf1</i>         | chr4:123349632-123684360  | 212.5552 | 198.4139 | -0.0993 | 0.328864 |
| <i>Eif3i</i>         | chr4:129591959-129600648  | 47.8173  | 43.7996  | -0.1266 | 0.390500 |
| <i>Lypla1</i>        | chr1:4807787-4886770      | 13.7621  | 14.3586  | 0.0612  | 0.483606 |
| <i>Gm17201</i>       | chr10:128391841-128395563 | 3.7234   | 2.8796   | -0.3707 | 0.327286 |
| <i>Gm26609</i>       | chr9:62804477-62808234    | 0.7355   | 0.9690   | 0.3978  | 0.114176 |
| <i>Gm14508</i>       | chr5:116009315-116016105  | 3.0312   | 2.4710   | -0.2948 | 0.379186 |
| <i>Trav16d-dv11</i>  | chr14:53047286-53047821   | 3.5381   | 4.4867   | 0.3427  | 0.384388 |
| <i>Btbd11</i>        | chr10:85386813-85660292   | 5.7835   | 6.1003   | 0.0769  | 0.519318 |
| <i>Brip1os</i>       | chr11:86201369-86304443   | 14.9596  | 14.0508  | -0.0904 | 0.199495 |
| <i>Atg2b</i>         | chr12:105613538-105685241 | 15.5734  | 14.6626  | -0.0869 | 0.236470 |
| <i>Nr2c2</i>         | chr6:92091389-92173057    | 29.9209  | 27.9476  | -0.0984 | 0.343427 |
| <i>Snora7a</i>       | chr6:115807974-115808114  | 133.6971 | 105.2590 | -0.3450 | 0.409669 |
| <i>Vps36</i>         | chr8:22192808-22220843    | 16.9111  | 15.7600  | -0.1017 | 0.201833 |
| <i>Polr1c</i>        | chr17:46243919-46248054   | 23.5851  | 21.6480  | -0.1236 | 0.327432 |
| <i>Cox5b</i>         | chr1:36691486-36693385    | 63.0105  | 69.7588  | 0.1468  | 0.565147 |
| <i>Nup210l</i>       | chr3:90104131-90212017    | 2.1761   | 2.3305   | 0.0989  | 0.308532 |
| <i>Rwdd3</i>         | chr3:121155399-121171695  | 1.4665   | 1.6052   | 0.1303  | 0.383244 |
| <i>Papss1</i>        | chr3:131564767-131643670  | 13.5951  | 12.6258  | -0.1067 | 0.212992 |
| <i>Mtrf1l</i>        | chr10:5811886-5823910     | 9.8536   | 10.2618  | 0.0586  | 0.282433 |
| <i>Adamts17</i>      | chr7:66839734-67152625    | 0.1262   | 0.0917   | -0.4607 | 0.300453 |
| <i>Sdcbp</i>         | chr4:6365649-6408423      | 33.9153  | 31.3008  | -0.1157 | 0.372465 |
| <i>Padi1</i>         | chr4:140812982-140845778  | 0.2472   | 0.3187   | 0.3664  | 0.422346 |
| <i>Tada3</i>         | chr6:113366024-113377883  | 5.9515   | 6.2624   | 0.0735  | 0.324632 |
| <i>Armcx5</i>        | chrX:135742732-135747322  | 7.3575   | 7.6928   | 0.0643  | 0.348944 |
| <i>Trav6-1</i>       | chr14:52638514-52638962   | 4.7272   | 5.8991   | 0.3195  | 0.452231 |
| <i>Gm26510</i>       | chr17:70874351-70924996   | 8.7468   | 9.3640   | 0.0984  | 0.445475 |
| <i>Cntf</i>          | chr19:12763659-12765632   | 3.9266   | 3.3288   | -0.2383 | 0.377705 |
| <i>Nuak2</i>         | chr1:132316125-132333488  | 0.9385   | 0.7911   | -0.2465 | 0.325520 |
| <i>Hdhd2</i>         | chr18:76930125-76972902   | 9.3635   | 9.9074   | 0.0815  | 0.507212 |
| <i>Fbxw5</i>         | chr2:25500749-25505471    | 16.3248  | 14.9984  | -0.1223 | 0.357173 |
| <i>Gm13622</i>       | chr2:69737356-69737789    | 3.6618   | 2.7831   | -0.3959 | 0.472483 |
| <i>Wipf1</i>         | chr2:73429609-73529734    | 22.7650  | 24.3866  | 0.0993  | 0.613665 |
| <i>Dnttip2</i>       | chr3:122274413-122285269  | 44.6162  | 46.5201  | 0.0603  | 0.460245 |
| <i>Ubp2</i>          | chr4:41194312-41275144    | 8.0274   | 8.6077   | 0.1007  | 0.559934 |
| <i>Tcea1</i>         | chr1:4857813-4897909      | 9.2486   | 9.7511   | 0.0763  | 0.388616 |
| <i>Ankrd52</i>       | chr10:128377114-128408704 | 5.2046   | 5.5880   | 0.1026  | 0.587618 |
| <i>9430091E24Rik</i> | chr8:111128885-111145480  | 10.2220  | 9.2558   | -0.1433 | 0.251772 |
| <i>Gm22249</i>       | chr5:38546457-38546593    | 30.6172  | 26.2746  | -0.2207 | 0.221908 |
| <i>Ipo4</i>          | chr14:55625399-55637895   | 11.4774  | 11.8935  | 0.0514  | 0.449530 |
| <i>Mir342</i>        | chr12:108658619-108658718 | 10.5364  | 7.8254   | -0.4292 | 0.344903 |
| <i>Smim13</i>        | chr13:41249859-41276574   | 3.4062   | 3.0647   | -0.1524 | 0.400986 |
| <i>Rbl2</i>          | chr8:91070056-91123844    | 26.4344  | 27.2958  | 0.0463  | 0.500788 |
| <i>Glb1</i>          | chr9:114401075-114474376  | 18.6906  | 17.2856  | -0.1127 | 0.306417 |
| <i>Fmr1</i>          | chrX:68678540-68717963    | 11.7965  | 12.2395  | 0.0532  | 0.469252 |
| <i>March5</i>        | chr19:37207542-37222139   | 20.8009  | 19.4864  | -0.0942 | 0.087710 |
| <i>Pip4k2a</i>       | chr2:18842254-18998126    | 32.1915  | 33.5277  | 0.0587  | 0.420758 |
| <i>Bach2</i>         | chr4:32238803-32586108    | 8.2173   | 8.9297   | 0.1200  | 0.607369 |
| <i>Trav6-3</i>       | chr14:53428710-53430375   | 2.2196   | 1.5518   | -0.5164 | 0.363659 |
| <i>Sec11a</i>        | chr7:80904888-80947780    | 22.3920  | 20.9642  | -0.0951 | 0.201421 |
| <i>Hexim2</i>        | chr11:103132428-103139876 | 1.7285   | 1.4992   | -0.2053 | 0.132597 |
| <i>Mzt1</i>          | chr14:99034543-99046136   | 22.2776  | 23.2525  | 0.0618  | 0.421201 |
| <i>Nt5dc3</i>        | chr10:86779004-86838389   | 3.4395   | 3.1608   | -0.1219 | 0.258570 |
| <i>Aurkb</i>         | chr11:69045646-69051664   | 1.7722   | 2.1188   | 0.2577  | 0.605387 |
| <i>Zfp367</i>        | chr13:64133021-64153202   | 6.8622   | 7.1538   | 0.0600  | 0.330758 |
| <i>Cwc27</i>         | chr13:104631139-104817142 | 8.9781   | 9.6179   | 0.0993  | 0.519959 |
| <i>Ubc</i>           | chr5:125385964-125390202  | 33.4735  | 30.8085  | -0.1197 | 0.382822 |
| <i>Taldo1</i>        | chr7:141392198-141402968  | 61.8367  | 56.4988  | -0.1302 | 0.405208 |
| <i>Leprotil1</i>     | chr8:34135571-34147033    | 75.4709  | 70.6774  | -0.0947 | 0.258876 |



|                      |                           |         |         |         |          |
|----------------------|---------------------------|---------|---------|---------|----------|
| <i>Abcb10</i>        | chr8:123952458-123983122  | 2.3559  | 2.5584  | 0.1190  | 0.493316 |
| <i>Panx1</i>         | chr9:15005160-15045478    | 25.3713 | 23.8829 | -0.0872 | 0.149650 |
| <i>C030014I23Rik</i> | chr9:44477923-44482180    | 2.0729  | 1.7936  | -0.2088 | 0.286504 |
| <i>Trps1</i>         | chr15:50654760-50890041   | 1.8765  | 2.0117  | 0.1003  | 0.516608 |
| <i>Ap3m1</i>         | chr14:21031441-21052508   | 12.0252 | 12.4214 | 0.0468  | 0.393279 |
| <i>Gm17103</i>       | chr16:38569322-38573300   | 5.2538  | 4.4232  | -0.2483 | 0.225874 |
| <i>Zdhhc23</i>       | chr16:43969077-43979093   | 1.7068  | 1.9698  | 0.2067  | 0.234754 |
| <i>Nfkbiz</i>        | chr16:55811374-55838899   | 25.9708 | 26.7638 | 0.0434  | 0.431217 |
| <i>Ncaph</i>         | chr2:127103808-127133954  | 2.5577  | 2.9102  | 0.1863  | 0.593708 |
| <i>Gm9774</i>        | chr3:92428065-92429423    | 1.2744  | 0.9811  | -0.3773 | 0.297518 |
| <i>Mllt3</i>         | chr4:87769924-88033364    | 11.8122 | 12.3969 | 0.0697  | 0.511249 |
| <i>Ovgp1</i>         | chr3:105973710-105987423  | 4.7012  | 4.3143  | -0.1239 | 0.166966 |
| <i>Gm22767</i>       | chr4:132838382-132838547  | 15.1226 | 11.5842 | -0.3845 | 0.445178 |
| <i>Cdk1</i>          | chr10:69336634-69352938   | 1.8809  | 2.1775  | 0.2112  | 0.603142 |
| <i>Mettl9</i>        | chr7:121034444-121076834  | 37.0676 | 33.4583 | -0.1478 | 0.443486 |
| <i>Zfyve26</i>       | chr12:79232346-79296282   | 8.8309  | 8.1395  | -0.1176 | 0.400897 |
| <i>Mir671</i>        | chr5:24592113-24592211    | 9.4612  | 6.9440  | -0.4463 | 0.247436 |
| <i>Mest</i>          | chr6:30723546-30748455    | 0.8412  | 0.9560  | 0.1845  | 0.372946 |
| <i>Tmem176a</i>      | chr6:48841482-48845364    | 0.6176  | 0.8005  | 0.3743  | 0.153406 |
| <i>Zfp619</i>        | chr7:39517765-39540420    | 1.8039  | 1.6135  | -0.1609 | 0.309768 |
| <i>Timm44</i>        | chr8:4259730-4275913      | 19.5703 | 20.1713 | 0.0436  | 0.293678 |
| <i>Tgjf1</i>         | chr17:70844204-70853546   | 10.3560 | 10.9990 | 0.0869  | 0.528166 |
| <i>Mrpl11</i>        | chr19:4962305-4966995     | 8.1245  | 8.5826  | 0.0791  | 0.426804 |
| <i>Fam89b</i>        | chr19:5728086-5729653     | 28.6194 | 30.4117 | 0.0876  | 0.510819 |
| <i>Lpgat1</i>        | chr1:191717833-191784255  | 5.7713  | 6.1329  | 0.0877  | 0.549489 |
| <i>Nudt17</i>        | chr3:96705891-96708560    | 0.8665  | 0.6718  | -0.3672 | 0.215521 |
| <i>Sarnp</i>         | chr10:128821770-128877638 | 12.5540 | 13.5319 | 0.1082  | 0.431366 |
| <i>Gm12061</i>       | chr11:23894559-23895488   | 5.6374  | 6.5796  | 0.2230  | 0.425494 |
| <i>Tob1</i>          | chr11:94211453-94215495   | 8.1686  | 8.9293  | 0.1285  | 0.548449 |
| <i>Ung</i>           | chr5:114130385-114139323  | 6.5144  | 5.9642  | -0.1273 | 0.192939 |
| <i>9130023H24Rik</i> | chr7:128234450-128238031  | 5.4228  | 5.7227  | 0.0776  | 0.380263 |
| <i>Map2k7</i>        | chr8:4238739-4251423      | 15.9775 | 16.9248 | 0.0831  | 0.568623 |
| <i>Gm15210</i>       | chr8:100030486-100032147  | 7.4703  | 6.7541  | -0.1454 | 0.272973 |
| <i>Celf2</i>         | chr2:6539693-7509563      | 11.1504 | 11.5671 | 0.0529  | 0.538295 |
| <i>Gm13571</i>       | chr2:60338187-60371234    | 6.9087  | 7.5166  | 0.1217  | 0.586780 |
| <i>Fastkd1</i>       | chr2:69686814-69713516    | 4.8974  | 4.4621  | -0.1343 | 0.377983 |
| <i>Efcab7</i>        | chr4:99829197-99912788    | 2.3506  | 2.0343  | -0.2085 | 0.283459 |
| <i>A3galt2</i>       | chr4:128755363-128769298  | 0.2738  | 0.3478  | 0.3453  | 0.386365 |
| <i>Mre11a</i>        | chr9:14784653-14837123    | 13.5268 | 12.6905 | -0.0921 | 0.182020 |
| <i>Gm15560</i>       | chr10:7808115-7808758     | 3.0077  | 3.5630  | 0.2444  | 0.304257 |
| <i>Gm26546</i>       | chr10:88379243-88383711   | 2.0981  | 2.3414  | 0.1583  | 0.551586 |
| <i>Idx41</i>         | chr13:55530409-55536658   | 37.9073 | 39.5714 | 0.0620  | 0.503846 |
| <i>Dtgam</i>         | chr7:128062639-128128160  | 0.8441  | 0.9439  | 0.1613  | 0.494737 |
| <i>5830432E09Rik</i> | chr7:135635930-135652314  | 2.8173  | 2.5368  | -0.1513 | 0.331165 |
| <i>Mta2</i>          | chr19:8941874-8952303     | 83.4323 | 79.0851 | -0.0772 | 0.133246 |
| <i>Cfap43</i>        | chr19:47737560-47919287   | 0.4529  | 0.3804  | -0.2516 | 0.206272 |
| <i>Nfyc</i>          | chr4:120757437-120831572  | 9.5912  | 8.8654  | -0.1135 | 0.255200 |
| <i>Gm12102</i>       | chr11:31003294-31003898   | 2.7193  | 3.2561  | 0.2599  | 0.367422 |
| <i>Rnf145</i>        | chr11:44518963-44565520   | 35.5798 | 33.5392 | -0.0852 | 0.268927 |
| <i>Lrrc59</i>        | chr11:94629766-94645216   | 25.7093 | 23.9682 | -0.1012 | 0.276303 |
| <i>Asb13</i>         | chr13:3634031-3651774     | 17.6356 | 16.2253 | -0.1202 | 0.365828 |
| <i>4930470G03Rik</i> | chr13:21440470-21445934   | 26.2786 | 24.1222 | -0.1235 | 0.412756 |
| <i>Suds3</i>         | chr5:117091681-117115993  | 38.3655 | 35.3559 | -0.1179 | 0.329454 |
| <i>Zfp956</i>        | chr6:47953389-47965300    | 13.6579 | 12.7447 | -0.0998 | 0.140124 |
| <i>2010315B03Rik</i> | chr9:124292990-124311750  | 18.3136 | 16.6235 | -0.1397 | 0.378078 |
| <i>Maf1</i>          | chr15:76351293-76354380   | 56.5093 | 52.5338 | -0.1052 | 0.322913 |
| <i>Gfer</i>          | chr17:24693190-24696156   | 8.7075  | 9.3626  | 0.1047  | 0.479183 |
| <i>Rhot2</i>         | chr17:25838456-25844851   | 16.3118 | 15.3283 | -0.0897 | 0.187625 |
| <i>Gm16580</i>       | chr17:26269335-26270379   | 2.7560  | 3.2911  | 0.2560  | 0.485755 |
| <i>Hdgfrp2</i>       | chr17:56079656-56100596   | 35.0133 | 36.6207 | 0.0648  | 0.502072 |
| <i>Ier5</i>          | chr1:155096366-155099636  | 47.8385 | 44.5488 | -0.1028 | 0.289836 |
| <i>Mllt10</i>        | chr2:18055236-18212388    | 22.8619 | 23.4142 | 0.0344  | 0.198583 |
| <i>Snhg7</i>         | chr2:26637176-26640244    | 16.3237 | 15.2692 | -0.0963 | 0.084257 |
| <i>Dnajc17</i>       | chr2:119172499-119208795  | 8.3811  | 9.0504  | 0.1108  | 0.446109 |
| <i>Kcnb1</i>         | chr2:167103377-167190155  | 0.2561  | 0.3217  | 0.3289  | 0.319414 |
| <i>Taf12</i>         | chr4:132274374-132295766  | 11.1110 | 11.8192 | 0.0891  | 0.508323 |
| <i>Dph1</i>          | chr11:75177642-75191241   | 15.4595 | 16.1056 | 0.0591  | 0.440937 |
| <i>Gm11675</i>       | chr11:111276099-111276931 | 1.8668  | 2.2483  | 0.2683  | 0.316042 |
| <i>Bckdhb</i>        | chr9:83925149-84124239    | 6.4944  | 7.0026  | 0.1087  | 0.273837 |
| <i>Ngdn</i>          | chr14:55015453-55024135   | 56.9381 | 53.0285 | -0.1026 | 0.236149 |
| <i>Pgap1</i>         | chr1:54472999-54557684    | 7.2896  | 6.7781  | -0.1050 | 0.305850 |

|               |                           |          |          |         |          |
|---------------|---------------------------|----------|----------|---------|----------|
| Gm7701        | chr18:24257377-24258856   | 1.9626   | 2.2612   | 0.2043  | 0.372726 |
| Rtel1         | chr2:181319738-181356616  | 20.0411  | 19.0049  | -0.0766 | 0.085714 |
| Tmem79        | chr3:88328654-88334504    | 0.9811   | 0.8124   | -0.2721 | 0.323678 |
| AW011738      | chr4:156203303-156205151  | 17.2498  | 15.7259  | -0.1334 | 0.363930 |
| Lamp1         | chr8:13159134-13175338    | 66.7253  | 62.8206  | -0.0870 | 0.199540 |
| Sptbn1        | chr11:30099394-30268175   | 50.2514  | 47.3722  | -0.0851 | 0.284721 |
| Mrpl45        | chr11:97315715-97329920   | 11.5068  | 10.6346  | -0.1137 | 0.227808 |
| Galc          | chr12:98202303-98259459   | 1.2614   | 1.1001   | -0.1974 | 0.202905 |
| Neil3         | chr8:53586866-53639065    | 0.6990   | 0.8303   | 0.2483  | 0.541468 |
| Zc3h18        | chr8:122376608-122417360  | 13.2224  | 13.8193  | 0.0637  | 0.547332 |
| Disc1         | chr8:125054194-125261858  | 1.4620   | 1.6022   | 0.1321  | 0.170934 |
| Gspt1         | chr16:11219291-11254270   | 26.8909  | 27.7147  | 0.0435  | 0.436767 |
| Gm22422       | chr16:56035752-56035887   | 96.6584  | 74.3499  | -0.3786 | 0.423418 |
| Gm16066       | chr19:3798614-3852419     | 2.4840   | 2.0758   | -0.2590 | 0.303166 |
| Strbp         | chr2:37569867-37703859    | 4.8005   | 5.0022   | 0.0594  | 0.448899 |
| Snord12       | chr2:167065275-167065365  | 43.6206  | 49.8950  | 0.1939  | 0.458248 |
| Gm22573       | chr4:155720039-155720141  | 11.1145  | 13.6861  | 0.3003  | 0.226404 |
| Kmt2a         | chr9:44803354-44881296    | 14.2471  | 15.4353  | 0.1156  | 0.636861 |
| Snw1          | chr12:87449935-87472299   | 84.8629  | 88.3841  | 0.0587  | 0.499126 |
| Kdm2a         | chr19:4316143-4398285     | 23.5832  | 22.3363  | -0.0784 | 0.200350 |
| Zfp93         | chr7:24270419-24276827    | 1.6123   | 1.3338   | -0.2736 | 0.423070 |
| Supg2         | chr8:70234225-70279915    | 8.1456   | 7.5618   | -0.1073 | 0.385655 |
| Swi5          | chr2:32278815-32288075    | 30.6219  | 33.1891  | 0.1161  | 0.568976 |
| Slain1os      | chr14:103692982-103699442 | 4.7021   | 4.2797   | -0.1358 | 0.246804 |
| Helz          | chr11:107547929-107693826 | 6.2488   | 6.5709   | 0.0725  | 0.583662 |
| 5033403F01Rik | chr13:38960618-38966299   | 0.4737   | 0.6165   | 0.3801  | 0.184655 |
| Jakmip1       | chr5:37028334-37148001    | 27.8104  | 25.9993  | -0.0972 | 0.313907 |
| Bcl7a         | chr5:123343833-123374082  | 3.0974   | 2.8711   | -0.1095 | 0.218736 |
| Ddx55         | chr5:124552863-124569660  | 9.4286   | 8.8450   | -0.0922 | 0.138087 |
| Ngp           | chr9:110419749-110423010  | 0.9123   | 1.3308   | 0.5447  | 0.538279 |
| Tomm6os       | chr17:47687609-47691083   | 1.1127   | 0.9396   | -0.2439 | 0.305820 |
| Atrnl1        | chr19:57611033-58133338   | 2.7761   | 2.5432   | -0.1264 | 0.264147 |
| Pask          | chr1:93308769-93343482    | 0.6255   | 0.5293   | -0.2409 | 0.451741 |
| Ass1          | chr2:31470206-31520672    | 5.7306   | 6.1336   | 0.0980  | 0.405603 |
| Gm21985       | chr2:112266313-112406319  | 28.8247  | 27.0458  | -0.0919 | 0.271476 |
| Dut           | chr2:125247189-125258608  | 14.5093  | 13.5233  | -0.1015 | 0.130239 |
| Dnttip1       | chr2:164745982-164768607  | 9.8683   | 10.4052  | 0.0764  | 0.313805 |
| B430305J03Rik | chr3:61362249-61365951    | 6.8579   | 6.2699   | -0.1293 | 0.344168 |
| Rhoc          | chr3:104789010-104794459  | 1.5442   | 1.1995   | -0.3645 | 0.406336 |
| Iqsec1        | chr6:90659597-90810123    | 7.7546   | 8.3285   | 0.1030  | 0.612919 |
| Prpf6         | chr2:181591867-181655660  | 31.9672  | 33.3796  | 0.0624  | 0.517004 |
| Scoc          | chr8:83434492-83458391    | 2.4001   | 2.7329   | 0.1873  | 0.475710 |
| Lsm7          | chr10:80852824-80855209   | 6.8618   | 7.9307   | 0.2089  | 0.417758 |
| Zkscan6       | chr11:65807174-65829239   | 18.1138  | 16.8355  | -0.1056 | 0.231147 |
| 0610010K14Rik | chr11:70235205-70237914   | 13.4392  | 14.4006  | 0.0997  | 0.515642 |
| Mllt6         | chr11:97663413-97685463   | 57.7924  | 54.3887  | -0.0876 | 0.283526 |
| Cbx4          | chr11:119077572-119086221 | 20.4520  | 19.2039  | -0.0908 | 0.212179 |
| Yae1d1        | chr13:17986639-17993351   | 4.0705   | 3.6122   | -0.1723 | 0.426754 |
| Nol7          | chr13:43398375-43402858   | 60.2050  | 63.5257  | 0.0775  | 0.526639 |
| Ndufaf2       | chr13:108052589-108158625 | 8.2295   | 7.2155   | -0.1897 | 0.211026 |
| Lrrc8c        | chr5:105519387-105613018  | 11.7256  | 12.3513  | 0.0750  | 0.591418 |
| Rad51ap1      | chr6:126923049-126939587  | 1.2506   | 1.4140   | 0.1772  | 0.540194 |
| Fkbp4         | chr6:128429734-128438677  | 53.4670  | 48.9555  | -0.1272 | 0.395066 |
| Anapc15       | chr7:101881324-101901845  | 5.1687   | 4.7777   | -0.1135 | 0.181090 |
| NA            | chr7:119739925-119742226  | 1.0801   | 0.8227   | -0.3927 | 0.398345 |
| Tbx6          | chr7:126781482-126785560  | 5.5402   | 4.8924   | -0.1794 | 0.402016 |
| Tial1         | chr7:128439776-128461717  | 17.6069  | 16.5294  | -0.0911 | 0.254675 |
| Lsp1          | chr7:142460808-142494867  | 111.0776 | 116.8333 | 0.0729  | 0.561982 |
| Gm26572       | chr8:121091627-121094858  | 2.1987   | 1.9472   | -0.1752 | 0.312209 |
| Gramd1b       | chr9:40293232-40531383    | 10.8796  | 11.3594  | 0.0623  | 0.564469 |
| Gm1848        | chrX:21146842-21147640    | 5.4627   | 6.1891   | 0.1801  | 0.413559 |
| Nox1          | chrX:134086420-134221956  | 2.5050   | 2.2086   | -0.1817 | 0.389341 |
| Naprt         | chr15:75890963-75894481   | 0.6921   | 0.5343   | -0.3735 | 0.325587 |
| Piwil2        | chr14:70372479-70429094   | 0.1981   | 0.1441   | -0.4596 | 0.373388 |
| Gm15869       | chr16:14316073-14317285   | 3.4594   | 2.8378   | -0.2857 | 0.313572 |
| Tmem44        | chr16:30511854-30550842   | 0.1491   | 0.1147   | -0.3790 | 0.395596 |
| Adprh         | chr16:38445398-38452689   | 21.3334  | 19.7213  | -0.1134 | 0.308001 |
| Snora41       | chr1:63179003-63179135    | 19.6149  | 16.0513  | -0.2893 | 0.357467 |
| BC055324      | chr1:163945992-163994796  | 5.1667   | 5.4885   | 0.0872  | 0.476110 |
| Dnlz          | chr2:26348120-26352110    | 11.1814  | 10.3878  | -0.1062 | 0.164723 |
| Atp9a         | chr2:168634437-168742409  | 0.4397   | 0.3694   | -0.2513 | 0.271942 |

|               |                           |          |          |         |          |
|---------------|---------------------------|----------|----------|---------|----------|
| Pag1          | chr3:9687478-9833679      | 22.8351  | 21.2469  | -0.1040 | 0.390920 |
| Slc50a1       | chr3:89268245-89270570    | 58.1896  | 59.9620  | 0.0433  | 0.409045 |
| Cyb561d1      | chr3:108195686-108201212  | 8.7186   | 8.1926   | -0.0898 | 0.055500 |
| Csf3r         | chr4:126024549-126044440  | 0.2796   | 0.3830   | 0.4538  | 0.580915 |
| R3hcc1l       | chr19:42518758-42592343   | 7.8443   | 8.1938   | 0.0629  | 0.433950 |
| AA474331      | chr10:39890017-39899238   | 4.6974   | 5.0216   | 0.0963  | 0.541763 |
| Zfp870        | chr17:32879227-32886083   | 0.1357   | 0.1807   | 0.4135  | 0.398916 |
| Rfwd2         | chr1:159232325-159347580  | 5.0870   | 5.4283   | 0.0937  | 0.509084 |
| Cep250        | chr2:155956457-155998900  | 16.7343  | 15.7506  | -0.0874 | 0.268533 |
| Sidt1         | chr16:44240179-4433196    | 70.5297  | 75.4229  | 0.0968  | 0.624534 |
| Oprm1         | chr10:6758505-7038198     | 1.9344   | 1.7057   | -0.1815 | 0.488129 |
| Gas2l3        | chr10:89408822-89443967   | 0.2152   | 0.2719   | 0.3377  | 0.515908 |
| Gns           | chr10:121365089-121397245 | 9.0987   | 9.5123   | 0.0641  | 0.491467 |
| Tgtp1         | chr11:48985326-48994172   | 31.1040  | 32.9172  | 0.0817  | 0.543062 |
| Hnrmp1        | chr11:50376989-50386528   | 98.9253  | 102.3503 | 0.0491  | 0.494038 |
| Axin2         | chr11:108920348-108950783 | 8.6182   | 7.8821   | -0.1288 | 0.435411 |
| Hexdc         | chr11:121204432-121222655 | 1.6834   | 1.4941   | -0.1722 | 0.324974 |
| Adam17        | chr12:21323508-21373632   | 19.1898  | 18.0470  | -0.0886 | 0.224932 |
| Gm4419        | chr12:21417910-21419803   | 2.2002   | 2.4668   | 0.1650  | 0.392908 |
| NA            | chr12:87442682-87444017   | 11.4956  | 12.1658  | 0.0817  | 0.348487 |
| Mok           | chr12:110807797-110840939 | 0.5056   | 0.6149   | 0.2824  | 0.447431 |
| Faf2          | chr13:54621783-54664068   | 16.2846  | 15.4237  | -0.0784 | 0.032433 |
| Cox7c         | chr13:86044815-86046904   | 16.7855  | 17.8459  | 0.0884  | 0.396024 |
| Gm4117        | chr13:89739459-89887166   | 0.0382   | 0.0301   | -0.3459 | 0.434634 |
| Fbxl5         | chr5:43744615-43821639    | 16.5314  | 17.0831  | 0.0474  | 0.441184 |
| 2210016L21Rik | chr5:114942157-114949783  | 9.9942   | 10.4340  | 0.0621  | 0.425784 |
| Isy1          | chr6:87818446-87838759    | 50.5708  | 54.1672  | 0.0991  | 0.560505 |
| Gm20705       | chr6:99384606-99388499    | 4.1971   | 4.5993   | 0.1320  | 0.496216 |
| Thumpd3       | chr6:113046224-113068273  | 23.3253  | 24.1305  | 0.0490  | 0.371900 |
| Gm26591       | chr6:120033521-120036471  | 3.0531   | 3.4287   | 0.1674  | 0.558131 |
| Crebl2        | chr6:134830153-134858931  | 13.0955  | 12.2018  | -0.1020 | 0.273270 |
| Yif1b         | chr7:29238328-29247593    | 12.0348  | 13.0116  | 0.1126  | 0.530097 |
| Ntrk3         | chr7:78192361-78578408    | 2.4949   | 2.2620   | -0.1414 | 0.279332 |
| Smpd1         | chr7:105554359-105558388  | 17.3068  | 18.1537  | 0.0689  | 0.522636 |
| Pycard        | chr7:127992102-127993867  | 62.2379  | 57.4695  | -0.1150 | 0.372401 |
| Nr2c2ap       | chr8:70131332-70133739    | 19.1950  | 17.8335  | -0.1061 | 0.046724 |
| Siah1a        | chr8:86723939-86746006    | 23.9302  | 25.0407  | 0.0654  | 0.449753 |
| Mon1b         | chr8:113635585-113645178  | 10.3992  | 9.7175   | -0.0978 | 0.259424 |
| Phldb1        | chr9:44686303-44735198    | 0.1530   | 0.1905   | 0.3165  | 0.404666 |
| Cep164        | chr9:45766945-45828691    | 8.7129   | 8.0051   | -0.1222 | 0.425564 |
| Dpp8          | chr9:65032457-65082650    | 45.8331  | 43.3275  | -0.0811 | 0.157829 |
| Cep63         | chr9:102586577-102626534  | 7.5760   | 7.1035   | -0.0929 | 0.136745 |
| Rbm15b        | chr9:106880928-106882289  | 16.5352  | 15.2353  | -0.1181 | 0.274806 |
| Ar            | chrX:98149720-98323215    | 2.1902   | 2.3204   | 0.0833  | 0.442938 |
| Itm2a         | chrX:107397098-107403376  | 16.5436  | 17.6940  | 0.0970  | 0.587265 |
| Snord72       | chr15:5118403-5118484     | 42.0708  | 33.6679  | -0.3214 | 0.474638 |
| Eif3h         | chr15:51786557-51865481   | 159.8617 | 173.0878 | 0.1147  | 0.575706 |
| Gm23880       | chr15:81586132-81586186   | 17.5497  | 13.2691  | -0.4034 | 0.197790 |
| Itga5         | chr15:103344288-103366763 | 0.7862   | 0.6733   | -0.2235 | 0.224379 |
| Psmc6         | chr14:14112183-14120984   | 37.7025  | 34.6532  | -0.1217 | 0.386613 |
| Trav6n-6      | chr14:53132850-53133137   | 6.1775   | 4.9602   | -0.3166 | 0.248657 |
| Wdr46         | chr17:33940659-33949695   | 27.5328  | 25.7431  | -0.0970 | 0.287659 |
| Xpo5          | chr17:46202854-46242299   | 27.6339  | 26.1705  | -0.0785 | 0.102046 |
| Eef1g         | chr19:8967040-8978479     | 61.3281  | 64.6389  | 0.0759  | 0.544346 |
| Camsap2       | chr1:136268122-136346104  | 12.2168  | 12.6820  | 0.0539  | 0.457743 |
| Gm13199       | chr2:5862079-5862934      | 9.4739   | 8.3959   | -0.1743 | 0.248886 |
| Pnpla7        | chr2:24976032-25054057    | 21.8759  | 20.4236  | -0.0991 | 0.346106 |
| Setx          | chr2:29124180-29182471    | 110.3701 | 104.3450 | -0.0810 | 0.217504 |
| Rtf1          | chr2:119675067-119735407  | 16.4502  | 17.5371  | 0.0923  | 0.575512 |
| Trp53bp1      | chr2:121193280-121271407  | 9.9910   | 10.2631  | 0.0388  | 0.366828 |
| Uqcc1         | chr2:155846893-155930310  | 5.6842   | 5.2803   | -0.1063 | 0.192611 |
| Zswim3        | chr2:164805097-164822130  | 3.4742   | 3.1117   | -0.1590 | 0.284703 |
| Acad9         | chr3:36065978-36094944    | 5.0908   | 4.7525   | -0.0992 | 0.192938 |
| Wwp1          | chr4:19608302-19708993    | 10.7452  | 11.1705  | 0.0560  | 0.484414 |
| Mdn1          | chr4:32657118-32775217    | 36.1396  | 33.9085  | -0.0919 | 0.322651 |
| Gm10300       | chr4:132074696-132076992  | 0.7953   | 0.6348   | -0.3252 | 0.340482 |
| Szrd1         | chr4:141113000-141139775  | 34.5722  | 32.0427  | -0.1096 | 0.333856 |
| Plekha2       | chr4:141625733-141664899  | 4.5304   | 4.7800   | 0.0774  | 0.460123 |
| Tnfrsf14      | chr4:154922209-154928563  | 30.9242  | 32.5325  | 0.0731  | 0.514000 |
| Gm15549       | chr8:68798866-68799488    | 2.0184   | 1.5614   | -0.3703 | 0.386131 |
| Nmd3          | chr3:69721984-69749042    | 19.3209  | 20.0581  | 0.0540  | 0.393876 |

|                      |                           |          |          |         |          |
|----------------------|---------------------------|----------|----------|---------|----------|
| <i>B130006D01Rik</i> | chr11:95723586-95726710   | 4.7815   | 4.3476   | -0.1372 | 0.325265 |
| <i>Rsph3a</i>        | chr17:7945652-7979824     | 1.1744   | 0.9805   | -0.2603 | 0.298419 |
| <i>Tespa1</i>        | chr10:130322851-130362642 | 48.9574  | 51.4907  | 0.0728  | 0.539561 |
| <i>Vwc2</i>          | chr11:11114222-11268931   | 0.2747   | 0.3485   | 0.3434  | 0.589110 |
| <i>Napb</i>          | chr2:148693984-148732467  | 0.2536   | 0.2982   | 0.2341  | 0.276858 |
| <i>Ccar1</i>         | chr10:62743927-62792368   | 34.7876  | 36.4883  | 0.0689  | 0.522869 |
| <i>Hal</i>           | chr10:93488767-93519304   | 0.1689   | 0.1289   | -0.3899 | 0.223700 |
| <i>Dnah9</i>         | chr11:65831281-66168551   | 0.0860   | 0.0674   | -0.3526 | 0.255905 |
| <i>Tgfb3l</i>        | chr8:4248213-4251423      | 2.8191   | 3.1696   | 0.1691  | 0.490152 |
| <i>Sjfn3</i>         | chr11:83191329-83215154   | 2.9706   | 3.4021   | 0.1957  | 0.578844 |
| <i>Osm</i>           | chr11:4236419-4241026     | 8.2881   | 8.7307   | 0.0751  | 0.272753 |
| <i>Gm13387</i>       | chr2:25122602-25145396    | 0.3111   | 0.4161   | 0.4195  | 0.524456 |
| <i>Lurap1</i>        | chr4:116132405-116151338  | 0.8885   | 0.7780   | -0.1916 | 0.294021 |
| <i>Rlf</i>           | chr4:121145372-121215084  | 26.3006  | 27.1574  | 0.0462  | 0.462118 |
| <i>Ddx56</i>         | chr11:6258918-6267772     | 25.9125  | 24.2992  | -0.0927 | 0.261444 |
| <i>Zdhhc3</i>        | chr9:123066159-123113205  | 11.3578  | 10.7740  | -0.0761 | 0.147104 |
| <i>Gm26892</i>       | chr1:132036804-132067945  | 0.5844   | 0.4356   | -0.4240 | 0.306295 |
| <i>Pik3c2a</i>       | chr7:116337275-116443458  | 29.1757  | 27.3397  | -0.0938 | 0.319483 |
| <i>Nde1</i>          | chr16:14163274-14192928   | 25.2693  | 23.8675  | -0.0823 | 0.117697 |
| <i>Rab11fip2</i>     | chr19:59902883-59943654   | 7.9080   | 8.2417   | 0.0596  | 0.485369 |
| <i>Heatr5a</i>       | chr12:51875872-51971321   | 7.6035   | 7.1329   | -0.0922 | 0.183737 |
| <i>NA</i>            | chr1:55335366-55335883    | 3.1763   | 2.5162   | -0.3361 | 0.394518 |
| <i>Mdm4</i>          | chr1:132989844-133025366  | 53.1754  | 49.8644  | -0.0927 | 0.309272 |
| <i>Gm7030</i>        | chr17:36109718-36129425   | 2.1759   | 1.7782   | -0.2912 | 0.306818 |
| <i>Med23</i>         | chr10:24869985-24913681   | 13.1545  | 12.4024  | -0.0849 | 0.188235 |
| <i>4930430F08Rik</i> | chr10:100572273-100589259 | 3.7862   | 4.0930   | 0.1124  | 0.406784 |
| <i>Derl2</i>         | chr11:71007163-71019841   | 8.9343   | 8.3881   | -0.0910 | 0.182553 |
| <i>Gm12359</i>       | chr11:98797706-98810087   | 10.2419  | 9.4941   | -0.1094 | 0.059784 |
| <i>Galnt9</i>        | chr5:110544344-110621382  | 1.0031   | 1.1756   | 0.2289  | 0.457848 |
| <i>Ftl1</i>          | chr7:45457943-45459884    | 63.6720  | 68.7446  | 0.1106  | 0.589497 |
| <i>Tmc3</i>          | chr7:83584926-83625614    | 1.1126   | 1.0088   | -0.1412 | 0.131969 |
| <i>Mettl10</i>       | chr7:132827456-132852673  | 13.4543  | 14.1548  | 0.0732  | 0.381781 |
| <i>Slc20a2</i>       | chr8:22476699-22569607    | 3.2675   | 3.5284   | 0.1109  | 0.500346 |
| <i>Imp3</i>          | chr9:56937499-56938397    | 59.8355  | 55.0062  | -0.1214 | 0.370226 |
| <i>Anxa2</i>         | chr9:69453619-69491795    | 15.7923  | 15.0523  | 0.1107  | 0.618031 |
| <i>Hsf1</i>          | chr15:76477444-76500972   | 22.3013  | 20.6530  | -0.1108 | 0.346708 |
| <i>Ankrd54</i>       | chr15:79053093-79062893   | 8.9700   | 8.3825   | -0.0977 | 0.190508 |
| <i>Rarg</i>          | chr15:102234937-102257517 | 16.3535  | 15.3072  | -0.0954 | 0.240190 |
| <i>Trav5-4</i>       | chr14:53704006-53704513   | 4.5326   | 3.5055   | -0.3707 | 0.398991 |
| <i>Gm16573</i>       | chr14:56607260-56620513   | 10.4146  | 11.5168  | 0.1451  | 0.590700 |
| <i>Snx15</i>         | chr19:6119398-6128304     | 6.0617   | 5.4780   | -0.1461 | 0.295798 |
| <i>Gm26879</i>       | chr1:192092371-192099630  | 5.0560   | 4.4397   | -0.1876 | 0.327131 |
| <i>Dph7</i>          | chr2:24962399-24972163    | 13.7399  | 12.5587  | -0.1297 | 0.368894 |
| <i>Supt20</i>        | chr3:54692822-54728762    | 25.4195  | 26.5262  | 0.0615  | 0.496203 |
| <i>Sfrp2</i>         | chr3:83766320-83774316    | 1.8964   | 1.6230   | -0.2246 | 0.375986 |
| <i>Shisa3</i>        | chr5:67607882-67623552    | 0.7971   | 0.8992   | 0.1739  | 0.450287 |
| <i>Fam71e1</i>       | chr7:44496587-44501134    | 1.6298   | 1.2949   | -0.3318 | 0.221045 |
| <i>Tspan32</i>       | chr7:143005045-143019644  | 26.9379  | 25.0309  | -0.1059 | 0.336243 |
| <i>Foxo3</i>         | chr10:42181840-42276755   | 16.3034  | 15.2490  | -0.0965 | 0.348495 |
| <i>Skp1a</i>         | chr11:52231994-52246858   | 83.6647  | 76.4623  | -0.1299 | 0.462539 |
| <i>Snora21</i>       | chr11:97781638-97781775   | 19.9446  | 22.6414  | 0.1830  | 0.326007 |
| <i>NA</i>            | chr13:67317941-67360605   | 8.0677   | 7.4149   | -0.1217 | 0.389429 |
| <i>Zbed5</i>         | chr5:129895722-129903623  | 0.5796   | 0.4599   | -0.3338 | 0.259568 |
| <i>Kcmf1</i>         | chr6:72841113-72899979    | 18.7264  | 19.6210  | 0.0673  | 0.470931 |
| <i>Rpl32</i>         | chr6:115805504-115808747  | 825.7219 | 700.7469 | -0.2368 | 0.417758 |
| <i>Zbtb45</i>        | chr7:13004935-13009822    | 6.2772   | 5.7609   | -0.1238 | 0.247838 |
| <i>Rpl17-ps10</i>    | chr7:72648756-72649311    | 2.4719   | 3.0486   | 0.3025  | 0.454694 |
| <i>Nob1</i>          | chr8:107412485-107425051  | 10.2079  | 9.4538   | -0.1107 | 0.330742 |
| <i>Sltm</i>          | chr9:70542919-70592237    | 56.8945  | 59.2644  | 0.0589  | 0.497637 |
| <i>Gm7666</i>        | chr15:6653922-6654741     | 1.9773   | 1.5874   | -0.3169 | 0.200394 |
| <i>Dok2</i>          | chr14:70766035-70778495   | 22.1614  | 23.5354  | 0.0868  | 0.581954 |
| <i>Map3k13</i>       | chr16:21891968-21931877   | 0.1904   | 0.2303   | 0.2746  | 0.278333 |
| <i>Rela</i>          | chr19:5637482-5648130     | 27.1087  | 28.5109  | 0.0728  | 0.568306 |
| <i>Fam13b</i>        | chr18:34442351-34506823   | 41.7319  | 39.1050  | -0.0938 | 0.305914 |
| <i>Tshz1</i>         | chr18:84011626-84086404   | 12.1104  | 11.2736  | -0.1033 | 0.351843 |
| <i>4930417H01Rik</i> | chr2:122702046-122721456  | 1.6515   | 1.4207   | -0.2172 | 0.094434 |
| <i>Mrgbp</i>         | chr2:180581303-180586304  | 20.8227  | 21.5702  | 0.0509  | 0.494773 |
| <i>Rapgef2</i>       | chr3:79062515-79181340    | 9.3257   | 9.6669   | 0.0518  | 0.552436 |
| <i>Atp6v0b</i>       | chr4:117884325-117887333  | 24.6069  | 22.8687  | -0.1057 | 0.267208 |
| <i>Pcyt2</i>         | chr11:120610086-120617936 | 12.2963  | 11.5038  | -0.0961 | 0.229591 |
| <i>NA</i>            | chr8:109863107-109864203  | 15.7771  | 16.8539  | 0.0953  | 0.487681 |

|                      |                           |          |          |         |          |
|----------------------|---------------------------|----------|----------|---------|----------|
| <i>Frmdbos</i>       | chr19:5848507-5851372     | 46.0905  | 42.1186  | -0.1300 | 0.361372 |
| <i>Npm1</i>          | chr11:33152286-33163206   | 134.9710 | 144.1091 | 0.0945  | 0.583150 |
| <i>Dnajc27</i>       | chr12:4082573-4110612     | 7.6541   | 7.9931   | 0.0625  | 0.440019 |
| <i>Gpc1</i>          | chr1:92831644-92860198    | 5.0417   | 4.4072   | -0.1940 | 0.508290 |
| <i>Mrps18a</i>       | chr17:46110985-46128910   | 7.5452   | 7.8638   | 0.0597  | 0.261018 |
| <i>Lyz2</i>          | chr10:117277333-117282274 | 3.9372   | 4.6123   | 0.2283  | 0.571308 |
| <i>Zfp456</i>        | chr13:67345245-67375810   | 10.2913  | 9.5260   | -0.1115 | 0.333143 |
| <i>Mrpl23</i>        | chr7:142532798-142540747  | 2.3738   | 2.0535   | -0.2091 | 0.300259 |
| <i>Fam188a</i>       | chr2:12347262-12419469    | 11.7721  | 12.3870  | 0.0735  | 0.529242 |
| <i>Rbbp8</i>         | chr18:11633275-11743207   | 10.9791  | 11.5075  | 0.0678  | 0.493328 |
| <i>Gopc</i>          | chr10:52337023-52382124   | 12.6141  | 11.9013  | -0.0839 | 0.046820 |
| <i>Rexo1</i>         | chr10:80540921-80561560   | 8.5482   | 7.9307   | -0.1082 | 0.388097 |
| <i>Elk3</i>          | chr10:93247413-93311135   | 17.8273  | 16.8519  | -0.0812 | 0.148635 |
| <i>Pik3r5</i>        | chr11:68432120-68497849   | 35.9028  | 37.8328  | 0.0755  | 0.608088 |
| <i>Dcald</i>         | chr11:102994046-103028333 | 2.9905   | 3.2395   | 0.1154  | 0.352997 |
| <i>Sumo2</i>         | chr11:115523101-115536276 | 4.1976   | 4.5352   | 0.1116  | 0.195444 |
| <i>Klhdc1</i>        | chr12:69241175-69284632   | 20.0104  | 20.8094  | 0.0565  | 0.464937 |
| <i>Atxn3</i>         | chr12:101918900-101958246 | 15.5772  | 14.6033  | -0.0931 | 0.248891 |
| <i>Wdr60</i>         | chr12:116207049-116263025 | 0.2412   | 0.1815   | -0.4106 | 0.217716 |
| <i>Heatr1</i>        | chr13:12395397-12438677   | 35.4506  | 33.1455  | -0.0970 | 0.324056 |
| <i>6720427107Rik</i> | chr13:48535522-48537822   | 38.3134  | 40.1643  | 0.0681  | 0.542751 |
| <i>Etohd2</i>        | chr13:59769964-59773680   | 16.5838  | 15.4811  | -0.0993 | 0.284386 |
| <i>4833420G17Rik</i> | chr13:119462758-119486117 | 61.1429  | 57.2049  | -0.0960 | 0.354008 |
| <i>Rheb</i>          | chr5:24802822-24842624    | 9.9916   | 9.3429   | -0.0968 | 0.245477 |
| <i>Gtf3c2</i>        | chr5:31151141-31180144    | 14.9351  | 13.9725  | -0.0961 | 0.340290 |
| <i>Nelfa</i>         | chr5:33896935-33936413    | 8.7725   | 9.1944   | 0.0678  | 0.532945 |
| <i>Fam114a1</i>      | chr5:64970070-65041874    | 1.6679   | 1.8382   | 0.1402  | 0.334769 |
| <i>Cenpc1</i>        | chr5:86012042-86065583    | 16.0486  | 16.7834  | 0.0646  | 0.514542 |
| <i>Atp6v0a2</i>      | chr5:124629066-124722144  | 34.9974  | 33.1055  | -0.0802 | 0.199422 |
| <i>Baz1b</i>         | chr5:135187263-135246129  | 34.8939  | 33.0184  | -0.0797 | 0.203880 |
| <i>Gm16120</i>       | chr5:140207384-140210751  | 1.1733   | 0.9082   | -0.3694 | 0.234746 |
| <i>Zfp316</i>        | chr5:143249696-143270022  | 0.9612   | 0.8535   | -0.1715 | 0.315172 |
| <i>Trbv30</i>        | chr6:41281375-41281990    | 8.5529   | 10.5190  | 0.2985  | 0.626928 |
| <i>Zfyve20</i>       | chr6:92186711-92214925    | 8.4038   | 7.7965   | -0.1082 | 0.281858 |
| <i>2310001H17Rik</i> | chr6:129208411-129237982  | 5.7461   | 5.2230   | -0.1377 | 0.424092 |
| <i>Far2</i>          | chr6:148047258-148182758  | 5.6404   | 5.9814   | 0.0847  | 0.521151 |
| <i>Nomo1</i>         | chr7:46033697-46084212    | 12.8617  | 12.0552  | -0.0934 | 0.296856 |
| <i>Fanci</i>         | chr7:79391928-79450265    | 5.8140   | 5.3177   | -0.1287 | 0.426370 |
| <i>Stard5</i>        | chr7:83631958-83653127    | 74.8472  | 71.0933  | -0.0742 | 0.121619 |
| <i>Tm2d2</i>         | chr8:25017210-25023259    | 13.4907  | 14.3741  | 0.0915  | 0.471618 |
| <i>Frg1</i>          | chr8:41397456-41417118    | 64.2689  | 68.3135  | 0.0880  | 0.564954 |
| <i>Msmo1</i>         | chr8:64718138-64733792    | 7.3481   | 6.7509   | -0.1223 | 0.395963 |
| <i>Cfap20</i>        | chr8:95420251-95434869    | 15.0385  | 15.8833  | 0.0788  | 0.364291 |
| <i>Gm26786</i>       | chr8:106237902-106425728  | 2.7367   | 2.5217   | -0.1180 | 0.189244 |
| <i>Cmc2</i>          | chr8:116888684-116921455  | 3.8838   | 3.4941   | -0.1526 | 0.119544 |
| <i>Hinfp</i>         | chr9:44295672-44305671    | 14.7703  | 13.8032  | -0.0977 | 0.150984 |
| <i>Pgm3</i>          | chr9:86552475-86571842    | 10.1447  | 10.5300  | 0.0538  | 0.409821 |
| <i>Gm26882</i>       | chr9:90094177-90095902    | 5.4436   | 4.8632   | -0.1627 | 0.349087 |
| <i>Timm17b</i>       | chrX:7899356-7908351      | 7.4537   | 8.0999   | 0.1200  | 0.568997 |
| <i>Jade3</i>         | chrX:20425687-20519939    | 5.4744   | 5.0969   | -0.1031 | 0.156830 |
| <i>Phf6</i>          | chrX:52912265-52956943    | 13.7707  | 14.2337  | 0.0477  | 0.457949 |
| <i>Gm14681</i>       | chrX:66778441-66778852    | 18.2043  | 15.9611  | -0.1897 | 0.404112 |
| <i>Hnrmp2</i>        | chrX:134601178-134607060  | 14.5917  | 15.2326  | 0.0620  | 0.507315 |
| <i>Gm16006</i>       | chr15:57708113-57708927   | 2.7405   | 3.2852   | 0.2616  | 0.418684 |
| <i>Rps6-ps1</i>      | chr15:76337615-76338365   | 1.4873   | 1.8608   | 0.3233  | 0.411780 |
| <i>Tnfrsf13c</i>     | chr15:82221743-82224339   | 1.5435   | 1.8041   | 0.2251  | 0.513961 |
| <i>Trabd</i>         | chr15:89075123-89087077   | 14.2836  | 13.3272  | -0.1000 | 0.346856 |
| <i>A130051J06Rik</i> | chr15:95787855-95791642   | 2.3507   | 2.6357   | 0.1651  | 0.488973 |
| <i>Csad</i>          | chr15:102176997-102189043 | 3.9802   | 3.5510   | -0.1646 | 0.342792 |
| <i>Dnah1</i>         | chr14:31260374-31323896   | 0.1336   | 0.1567   | 0.2303  | 0.166522 |
| <i>Ebpl</i>          | chr14:61339762-61360445   | 5.1045   | 5.5276   | 0.1149  | 0.456674 |
| <i>Gm15629</i>       | chr14:75197072-75199271   | 23.8856  | 20.6895  | -0.2072 | 0.489889 |
| <i>Nufip1</i>        | chr14:76110890-76137379   | 11.2208  | 11.6641  | 0.0559  | 0.444339 |
| <i>Rbm26</i>         | chr14:105106750-105177327 | 21.0397  | 21.7776  | 0.0497  | 0.556824 |
| <i>Neurl1b</i>       | chr17:26414828-26446349   | 0.1627   | 0.2080   | 0.3538  | 0.488099 |
| <i>H2-K2</i>         | chr17:33974785-33978788   | 30.7378  | 32.1496  | 0.0648  | 0.452752 |
| <i>Vapa</i>          | chr17:65580055-65613555   | 65.9954  | 69.0422  | 0.0651  | 0.526788 |
| <i>Rhoq</i>          | chr17:86963081-87000069   | 6.6146   | 7.0547   | 0.0929  | 0.590717 |
| <i>Vps8</i>          | chr16:21423117-21644680   | 5.5696   | 5.2058   | -0.0974 | 0.249666 |
| <i>Pcyt1a</i>        | chr16:32430920-32475070   | 2.8699   | 2.6386   | -0.1213 | 0.199489 |
| <i>Mina</i>          | chr16:59471774-59492461   | 18.2289  | 18.8027  | 0.0447  | 0.362665 |

|               |                           |         |         |         |          |
|---------------|---------------------------|---------|---------|---------|----------|
| Gm21970       | chr16:91391720-91419451   | 61.8160 | 63.9571 | 0.0491  | 0.413385 |
| Ostf1         | chr19:18579327-18631789   | 48.3078 | 49.8582 | 0.0456  | 0.490982 |
| NA            | chr19:45578276-45579763   | 17.0923 | 15.5532 | -0.1361 | 0.173330 |
| ldh1          | chr1:65158615-65186479    | 4.3016  | 3.8570  | -0.1574 | 0.367837 |
| Njfk          | chr1:118321838-118333822  | 46.4150 | 48.4976 | 0.0633  | 0.520244 |
| Mir1893       | chr18:6490563-6490646     | 71.4473 | 62.6906 | -0.1886 | 0.329520 |
| Mcm10         | chr2:4989713-5012791      | 0.7720  | 0.8796  | 0.1882  | 0.590666 |
| Gm26315       | chr2:7076093-7076414      | 5.0705  | 3.9784  | -0.3500 | 0.366379 |
| Thns1         | chr2:21205723-21215009    | 3.3831  | 3.0477  | -0.1506 | 0.326906 |
| Pdss1         | chr2:22895521-22940266    | 5.0589  | 5.3384  | 0.0776  | 0.511324 |
| Gm26702       | chr2:25575430-25580099    | 0.2305  | 0.1754  | -0.3941 | 0.259132 |
| Med27         | chr2:29346818-29524793    | 6.0679  | 6.3690  | 0.0699  | 0.328476 |
| Gm13572       | chr2:60037140-60038837    | 2.1342  | 1.6193  | -0.3983 | 0.378072 |
| Dlx1as        | chr2:71516453-71537891    | 0.6041  | 0.4589  | -0.3964 | 0.278476 |
| Gm13786       | chr2:92233104-92233437    | 6.6486  | 5.4065  | -0.2984 | 0.436627 |
| Ctdspl2       | chr2:121956000-122013642  | 10.4902 | 10.8589 | 0.0498  | 0.483642 |
| Rnf24         | chr2:131298063-131352892  | 3.5865  | 3.7947  | 0.0814  | 0.482179 |
| Gm14420       | chr2:177464732-177478129  | 1.4454  | 1.2024  | -0.2656 | 0.435505 |
| Tnfsf10       | chr3:27317027-27342427    | 11.5240 | 12.1469 | 0.0759  | 0.600539 |
| Gpatch4       | chr3:88043107-88055993    | 22.6921 | 24.3616 | 0.1024  | 0.576787 |
| Sf3b4         | chr3:96172331-96177564    | 3.8745  | 4.2447  | 0.1317  | 0.509290 |
| Syt6          | chr3:103575230-103645567  | 0.6358  | 0.7469  | 0.2322  | 0.557998 |
| 201001618Rik  | chr3:106482012-106483437  | 92.0692 | 86.3728 | -0.0921 | 0.332610 |
| Zcchc17       | chr4:130315382-130359943  | 9.4657  | 10.0167 | 0.0816  | 0.550987 |
| 2700016F22Rik | chr4:139376548-139380379  | 7.3208  | 6.8227  | -0.1017 | 0.140235 |
| Pbx4          | chr8:69832623-69873163    | 1.3067  | 1.4582  | 0.1583  | 0.364806 |
| Zbtb4         | chr11:69765911-69784023   | 15.7652 | 16.2263 | 0.0416  | 0.493374 |
| Top2a         | chr11:98992942-99024189   | 13.4253 | 15.8085 | 0.2357  | 0.517718 |
| Slc38a10      | chr11:120103959-120151346 | 20.2409 | 19.0941 | -0.0842 | 0.269372 |
| Chrm3         | chr13:9877228-9878998     | 0.4695  | 0.5878  | 0.3243  | 0.324559 |
| Mapre3        | chr5:30814640-30866106    | 0.8068  | 0.6883  | -0.2293 | 0.111811 |
| Khk           | chr5:30921555-30931246    | 4.4958  | 4.9170  | 0.1292  | 0.473713 |
| Tmem129       | chr5:33653215-33657977    | 9.5247  | 8.8480  | -0.1063 | 0.233798 |
| Pigg          | chr5:108312608-108349355  | 3.9527  | 3.5889  | -0.1393 | 0.380029 |
| Fbxo46        | chr7:19119858-19138261    | 11.9574 | 10.9498 | -0.1270 | 0.423829 |
| Wdr73         | chr7:80890722-80901269    | 10.6741 | 11.1019 | 0.0567  | 0.459899 |
| D230025D16Rik | chr8:105225144-105253053  | 7.8994  | 7.3371  | -0.1065 | 0.326576 |
| Rps28         | chr17:33819026-33824562   | 81.8777 | 95.2118 | 0.2177  | 0.450710 |
| Ring1         | chr17:34020791-34024680   | 7.9802  | 7.2981  | -0.1289 | 0.359684 |
| Nelfe         | chr17:34850390-34856372   | 7.1397  | 7.6648  | 0.1024  | 0.555479 |
| 0610012G03Rik | chr16:31948023-31948448   | 18.2042 | 16.0415 | -0.1825 | 0.406154 |
| Gm8250        | chr19:18581454-18582228   | 2.7103  | 2.2097  | -0.2946 | 0.343490 |
| 4930500M09Rik | chr1:170214859-170215556  | 5.8919  | 4.9539  | -0.2502 | 0.472184 |
| 8030462N17Rik | chr18:77633280-77714010   | 17.3054 | 16.3107 | -0.0854 | 0.076647 |
| Plk4          | chr3:40800018-40816883    | 3.9856  | 4.1948  | 0.0738  | 0.501394 |
| Gm17641       | chr3:68867916-68870266    | 0.4220  | 0.3220  | -0.3904 | 0.307412 |
| Gm18588       | chr3:68902266-68902758    | 3.4335  | 4.1353  | 0.2683  | 0.370049 |
| Nsmaf         | chr4:6396206-6454271      | 24.8327 | 25.6494 | 0.0467  | 0.573002 |
| Abca2         | chr2:25428702-25448540    | 19.0126 | 17.3870 | -0.1289 | 0.489623 |
| Gm26287       | chr1:59704257-59704338    | 22.3023 | 18.1012 | -0.3011 | 0.343318 |
| Specc1        | chr11:61956778-62223013   | 0.0565  | 0.0730  | 0.3706  | 0.426407 |
| 2700049A03Rik | chr12:71136847-71243303   | 7.5710  | 7.9711  | 0.0743  | 0.565235 |
| Pou2af1       | chr9:51213689-51240079    | 7.5281  | 7.9659  | 0.0816  | 0.501484 |
| Prps1         | chrX:140456612-140476140  | 21.9874 | 20.5697 | -0.0962 | 0.178778 |
| Oxr1          | chr15:41447481-41861048   | 20.1410 | 20.8513 | 0.0500  | 0.475975 |
| Loxl4         | chr19:42593981-42612813   | 0.5493  | 0.4557  | -0.2694 | 0.252789 |
| Gm24411       | chr2:158356423-158356554  | 7.1622  | 5.1694  | -0.4704 | 0.434864 |
| Tifa          | chr3:127789871-127832135  | 0.2580  | 0.3399  | 0.3976  | 0.419379 |
| Rnf168        | chr16:32277458-32301434   | 14.1367 | 13.2834 | -0.0898 | 0.169824 |
| Gm20636       | chr5:112374368-112377639  | 1.6898  | 2.1242  | 0.3301  | 0.391936 |
| Tfe3          | chrX:7762559-7775202      | 2.2202  | 2.3443  | 0.0785  | 0.445180 |
| Ipo5          | chr14:120911193-120948042 | 31.4486 | 32.3259 | 0.0397  | 0.445175 |
| Psmc3         | chr2:91054008-91066369    | 53.9922 | 56.1583 | 0.0567  | 0.541672 |
| Fktn          | chr4:53713997-53765785    | 2.8723  | 3.0358  | 0.0799  | 0.473975 |
| Mrs2          | chr13:24992482-25020379   | 15.9425 | 14.8708 | -0.1004 | 0.218879 |
| Smim19        | chr8:22462614-22476879    | 9.8637  | 10.4936 | 0.0893  | 0.421947 |
| Ankrd13c      | chr3:157947413-158006833  | 19.2880 | 17.8391 | -0.1127 | 0.370621 |
| Lmnb2         | chr10:80901202-80918245   | 6.4653  | 6.8636  | 0.0863  | 0.555198 |
| Dcaf10        | chr4:45342100-45379759    | 6.8652  | 6.4118  | -0.0986 | 0.304729 |
| Gm15697       | chr6:38542302-38546074    | 0.5646  | 0.6799  | 0.2681  | 0.458976 |
| Cd163         | chr6:124304650-124330527  | 0.1757  | 0.2208  | 0.3295  | 0.110436 |

|                      |                           |          |          |         |          |
|----------------------|---------------------------|----------|----------|---------|----------|
| <i>Mtdh</i>          | chr15:34082693-34142386   | 16.7485  | 17.2854  | 0.0455  | 0.538242 |
| <i>Ppp1r12b</i>      | chr1:134754657-134955942  | 2.5832   | 2.4130   | -0.0983 | 0.233315 |
| <i>Agbl3</i>         | chr6:34780431-34859459    | 0.7780   | 0.8364   | 0.1045  | 0.253145 |
| <i>Scmh1</i>         | chr4:120405280-120530186  | 1.0749   | 1.1891   | 0.1458  | 0.538556 |
| <i>Mettl7a1</i>      | chr15:100304816-100314348 | 2.0339   | 1.7318   | -0.2320 | 0.389405 |
| <i>1110004F10Rik</i> | chr7:116093300-116105210  | 32.5155  | 34.0511  | 0.0666  | 0.502636 |
| <i>Abi3</i>          | chr11:95830073-95842476   | 8.9822   | 8.3859   | -0.0991 | 0.249891 |
| <i>Jmjd4</i>         | chr11:59450044-59458567   | 7.0713   | 6.6718   | -0.0839 | 0.058363 |
| <i>Rpl38</i>         | chr11:114668523-114672331 | 13.5055  | 11.7750  | -0.1978 | 0.454782 |
| <i>Gm10011</i>       | chr6:149147518-149147865  | 1.8227   | 2.3899   | 0.3908  | 0.362432 |
| <i>Fbxo9</i>         | chr9:78081498-78109065    | 16.4700  | 15.4948  | -0.0881 | 0.152498 |
| <i>Flna</i>          | chrX:74223460-74249820    | 215.5216 | 205.2186 | -0.0707 | 0.185068 |
| <i>Ica1l</i>         | chr1:59989069-60043087    | 1.0889   | 1.2466   | 0.1951  | 0.542203 |
| <i>Nr3c1</i>         | chr18:39410544-39491301   | 33.6652  | 34.4630  | 0.0338  | 0.444521 |
| <i>Cntrl</i>         | chr2:35109491-35178822    | 60.9734  | 62.4040  | 0.0335  | 0.519274 |
| <i>Gm10804</i>       | chr2:93452818-93469871    | 1.7006   | 1.5077   | -0.1737 | 0.180428 |
| <i>Chd6</i>          | chr2:160946977-161109075  | 13.6430  | 14.1156  | 0.0491  | 0.576196 |
| <i>Gm12036</i>       | chr11:20729419-20729949   | 5.8626   | 4.9642   | -0.2400 | 0.305484 |
| <i>Tubd1</i>         | chr11:86544990-86567360   | 6.9151   | 6.3838   | -0.1153 | 0.015756 |
| <i>Ijfi35</i>        | chr11:101448406-101458698 | 52.2969  | 54.2293  | 0.0523  | 0.528550 |
| <i>Msh3</i>          | chr13:92211880-92355003   | 20.8088  | 21.5612  | 0.0512  | 0.512712 |
| <i>Gbx1</i>          | chr5:24502756-24527276    | 0.2915   | 0.3671   | 0.3326  | 0.474218 |
| <i>Cnot3</i>         | chr7:3645289-3661108      | 11.4131  | 11.9090  | 0.0614  | 0.513994 |
| <i>Gltscr2</i>       | chr7:15937837-15946108    | 207.5825 | 218.2079 | 0.0720  | 0.596135 |
| <i>B230317F23Rik</i> | chr8:60983436-60985908    | 1.4930   | 1.6728   | 0.1641  | 0.395771 |
| <i>1700048O20Rik</i> | chr9:121938134-121947014  | 1.1107   | 0.8493   | -0.3871 | 0.518533 |
| <i>4930480K23Rik</i> | chr14:69732783-69767113   | 2.3228   | 2.5022   | 0.1073  | 0.427627 |
| <i>Wfikkn1</i>       | chr17:25877629-25880305   | 1.9103   | 1.6497   | -0.2116 | 0.274231 |
| <i>Vps51</i>         | chr19:6067841-6080324     | 12.4918  | 11.7125  | -0.0929 | 0.239020 |
| <i>Tor1aip1</i>      | chr1:156004598-156036480  | 12.3892  | 12.9734  | 0.0665  | 0.601250 |
| <i>Lamb3</i>         | chr1:193301956-193343878  | 0.8665   | 0.9626   | 0.1518  | 0.360596 |
| <i>Rel2</i>          | chr18:37955078-37959179   | 5.3934   | 4.8773   | -0.1451 | 0.433599 |
| <i>Samd10</i>        | chr2:181595217-181599212  | 5.5026   | 5.0234   | -0.1315 | 0.265321 |
| <i>Sycp3</i>         | chr10:88459568-88473236   | 0.6606   | 0.8249   | 0.3205  | 0.340186 |
| <i>Drg1</i>          | chr11:3187359-3266415     | 25.7461  | 24.2084  | -0.0888 | 0.230133 |
| <i>Dhrs13os</i>      | chr11:78030011-78032665   | 1.8925   | 2.1034   | 0.1525  | 0.374796 |
| <i>4833417C18Rik</i> | chr11:95858864-95861044   | 2.4770   | 2.1171   | -0.2265 | 0.311097 |
| <i>Tmc8</i>          | chr11:117782075-117793110 | 28.2818  | 26.3231  | -0.1035 | 0.401568 |
| <i>Gdap10</i>        | chr12:32821871-32826904   | 5.3319   | 5.7354   | 0.1052  | 0.609930 |
| <i>Mtx3</i>          | chr13:92844786-92858230   | 9.4755   | 8.9013   | -0.0902 | 0.258455 |
| <i>Mterf1b</i>       | chr5:4192366-4197651      | 2.6022   | 2.9233   | 0.1679  | 0.359676 |
| <i>Gm15559</i>       | chr5:110770948-110779260  | 3.5041   | 3.1479   | -0.1546 | 0.246802 |
| <i>M6pr</i>          | chr6:122308719-122317680  | 52.1419  | 53.6064  | 0.0400  | 0.458469 |
| <i>Zfp628</i>        | chr7:4915216-4922003      | 2.8489   | 3.1685   | 0.1534  | 0.577067 |
| <i>Capns1</i>        | chr7:30186941-30195164    | 48.0248  | 50.2011  | 0.0639  | 0.566002 |
| <i>Grin2d</i>        | chr7:45831882-45870928    | 0.1185   | 0.1503   | 0.3426  | 0.126826 |
| <i>Rbbp6</i>         | chr7:122965685-123002557  | 24.4318  | 25.4444  | 0.0586  | 0.590317 |
| <i>Eif4ebp1</i>      | chr8:27260326-27275656    | 5.0781   | 4.4343   | -0.1956 | 0.325418 |
| <i>Nfatc3</i>        | chr8:106059602-106130537  | 44.2037  | 45.5432  | 0.0431  | 0.572039 |
| <i>Lman1l</i>        | chr9:57607084-57620774    | 1.0178   | 0.8228   | -0.3068 | 0.284051 |
| <i>9930014A18Rik</i> | chr15:60822964-60831793   | 1.7229   | 1.8538   | 0.1057  | 0.480506 |
| <i>Arid2</i>         | chr15:96287517-96404992   | 14.9159  | 15.3942  | 0.0455  | 0.558000 |
| <i>Snord69</i>       | chr14:31014286-31014366   | 17.3935  | 23.0093  | 0.4037  | 0.637362 |
| <i>Traj52</i>        | chr14:54165315-54165381   | 13.8881  | 10.2303  | -0.4410 | 0.432545 |
| <i>Kctd5</i>         | chr17:24047733-24073485   | 11.1192  | 10.4055  | -0.0957 | 0.088793 |
| <i>Njya</i>          | chr17:48386884-48409906   | 7.0170   | 6.5410   | -0.1013 | 0.332338 |
| <i>Cmss1</i>         | chr16:57302198-57606825   | 5.8191   | 6.3216   | 0.1195  | 0.190993 |
| <i>Map3k11</i>       | chr19:5689130-5702862     | 18.1319  | 16.7841  | -0.1114 | 0.394957 |
| <i>1500017E21Rik</i> | chr19:36614051-36705641   | 0.8165   | 0.6957   | -0.2309 | 0.271190 |
| <i>Lzts2</i>         | chr19:45015175-45027104   | 0.9179   | 1.0716   | 0.2234  | 0.475237 |
| <i>A630001G21Rik</i> | chr1:85717082-85778643    | 17.0583  | 17.9692  | 0.0751  | 0.601047 |
| <i>Nek7</i>          | chr1:138484713-138619696  | 32.5245  | 33.7939  | 0.0552  | 0.563056 |
| <i>1700019L03Rik</i> | chr2:32777380-32784428    | 0.5689   | 0.7478   | 0.3945  | 0.489187 |
| <i>Gm14027</i>       | chr2:129016951-129021756  | 6.4831   | 7.4654   | 0.2035  | 0.524222 |
| <i>Lbp</i>           | chr2:158306492-158332852  | 0.2497   | 0.1841   | -0.4395 | 0.480710 |
| <i>Lrig2</i>         | chr3:104453983-104511856  | 10.1295  | 9.4046   | -0.1071 | 0.395231 |
| <i>Camta1</i>        | chr4:150917321-151861876  | 0.8072   | 0.7361   | -0.1330 | 0.119300 |
| <i>Syne1</i>         | chr10:5336948-5550692     | 0.1833   | 0.2271   | 0.3095  | 0.513849 |
| <i>Polr2e</i>        | chr10:80035948-80039795   | 18.8080  | 20.0568  | 0.0927  | 0.600798 |
| <i>Cand1</i>         | chr10:119199254-119240055 | 24.6074  | 23.4373  | -0.0703 | 0.120790 |
| <i>Mtfp1</i>         | chr11:4091479-4095445     | 1.4051   | 1.6106   | 0.1969  | 0.388368 |

|                      |                           |          |          |         |          |
|----------------------|---------------------------|----------|----------|---------|----------|
| <i>Cep68</i>         | chr11:20227036-20249429   | 19.9041  | 18.8248  | -0.0804 | 0.220338 |
| <i>1700020L24Rik</i> | chr11:83437685-83441232   | 1.5745   | 1.8728   | 0.2503  | 0.307370 |
| <i>Adam6b</i>        | chr12:113489544-113492018 | 1.9790   | 1.6691   | -0.2457 | 0.493471 |
| <i>Slc30a9</i>       | chr5:67306954-67358565    | 13.3798  | 12.5229  | -0.0955 | 0.361815 |
| <i>Ppat</i>          | chr5:76913248-76951578    | 21.0508  | 21.9862  | 0.0627  | 0.536482 |
| <i>Rny1</i>          | chr6:47788068-47788180    | 24.6936  | 16.0345  | -0.6230 | 0.442528 |
| <i>Fbxo27</i>        | chr7:28692848-28699338    | 0.3502   | 0.4409   | 0.3324  | 0.494173 |
| <i>Ryr1</i>          | chr7:29003339-29125151    | 0.0593   | 0.0421   | -0.4938 | 0.480535 |
| <i>Spn</i>           | chr7:127132231-127137823  | 220.0407 | 226.0136 | 0.0386  | 0.579778 |
| <i>Gm26664</i>       | chr8:84665127-84669406    | 2.3614   | 1.8370   | -0.3623 | 0.450450 |
| <i>Cyb5r4</i>        | chr9:87022013-87077774    | 10.0288  | 10.3336  | 0.0432  | 0.304265 |
| <i>Azi2</i>          | chr9:118040498-118069794  | 22.0877  | 20.7467  | -0.0904 | 0.301620 |
| <i>Frmf7</i>         | chrX:50895179-50942710    | 0.4166   | 0.5214   | 0.3237  | 0.224506 |
| <i>Htatsf1</i>       | chrX:57053582-57067183    | 18.0668  | 16.8380  | -0.1016 | 0.314716 |
| <i>Lrrc6</i>         | chr15:66379857-66500910   | 0.7557   | 0.9122   | 0.2715  | 0.504818 |
| <i>Mfsd3</i>         | chr15:76701541-76704239   | 3.5549   | 3.1771   | -0.1621 | 0.339830 |
| <i>Kctd17</i>        | chr15:78428563-78438909   | 0.5245   | 0.6613   | 0.3344  | 0.486798 |
| <i>Hdac7</i>         | chr15:97792663-97844502   | 26.6970  | 24.6550  | -0.1148 | 0.468296 |
| <i>Larp4</i>         | chr15:99970073-100016351  | 16.3851  | 16.9100  | 0.0455  | 0.432110 |
| <i>Dcaf11</i>        | chr14:55560005-55570065   | 12.0505  | 11.4045  | -0.0795 | 0.150161 |
| <i>Psme2</i>         | chr14:55587440-55591113   | 42.4543  | 38.7925  | -0.1301 | 0.455279 |
| <i>Socs1</i>         | chr16:10783807-10785536   | 31.6552  | 28.8039  | -0.1362 | 0.486220 |
| <i>Yeats2</i>        | chr16:20141062-20232573   | 18.7951  | 17.8683  | -0.0729 | 0.114679 |
| <i>Adrbk1</i>        | chr19:4286000-4306222     | 111.5664 | 106.1344 | -0.0720 | 0.199596 |
| <i>Ankrd23</i>       | chr1:36530533-36535729    | 8.3981   | 7.7089   | -0.1235 | 0.250357 |
| <i>Eij4e2</i>        | chr1:87213913-87240488    | 15.5557  | 16.1354  | 0.0528  | 0.501138 |
| <i>Vangl2</i>        | chr1:17200959-172028444   | 0.3010   | 0.2485   | -0.2764 | 0.332704 |
| <i>Lcmt2</i>         | chr2:121128306-121140698  | 5.2972   | 5.5839   | 0.0760  | 0.467797 |
| <i>mt-Cytb</i>       | chrM:14144-15288          | 434.5630 | 467.1369 | 0.1043  | 0.648475 |
| <i>Zbtb8os</i>       | chr4:129335694-129354547  | 4.0215   | 4.2685   | 0.0860  | 0.490940 |
| <i>Tmem200b</i>      | chr4:131921770-131923140  | 0.4527   | 0.5910   | 0.3846  | 0.245827 |
| <i>Tmem57</i>        | chr4:134802758-134853345  | 11.5967  | 12.0225  | 0.0520  | 0.505958 |
| <i>Gm10563</i>       | chr4:155614412-155645408  | 4.8371   | 5.9931   | 0.3092  | 0.401708 |
| <i>Phc1</i>          | chr6:122317730-122340561  | 2.5019   | 2.6808   | 0.0996  | 0.473276 |
| <i>Gpr1</i>          | chr1:63182690-63214543    | 0.4483   | 0.5712   | 0.3493  | 0.521891 |
| <i>Dnajb14</i>       | chr3:137867674-137916557  | 1.3419   | 1.4365   | 0.0983  | 0.523469 |
| <i>Icosl</i>         | chr10:78069359-78079525   | 4.0644   | 3.5706   | -0.1869 | 0.512264 |
| <i>Fsd2</i>          | chr7:81533307-81566944    | 2.3104   | 1.9344   | -0.2563 | 0.531209 |
| <i>Sertad1</i>       | chr7:27486909-27490316    | 17.1642  | 15.8739  | -0.1127 | 0.272986 |
| <i>Zfp414</i>        | chr17:33629089-33631779   | 8.5748   | 9.0862   | 0.0836  | 0.471542 |
| <i>Ppp1r2</i>        | chr16:31251536-31275277   | 3.6793   | 3.4038   | -0.1123 | 0.079014 |
| <i>Notch1</i>        | chr2:26457902-26516663    | 18.3055  | 16.7457  | -0.1285 | 0.511534 |
| <i>Gm13610</i>       | chr2:32232781-32236382    | 11.0165  | 9.5875   | -0.2004 | 0.507186 |
| <i>Plcb4</i>         | chr2:135659010-136014593  | 0.5335   | 0.5845   | 0.1319  | 0.238194 |
| <i>2010001A14Rik</i> | chr11:57795498-57801417   | 3.2643   | 2.6493   | -0.3012 | 0.438495 |
| <i>Smarce1</i>       | chr11:99209046-99231017   | 9.7221   | 10.1856  | 0.0672  | 0.542355 |
| <i>Cipc</i>          | chr12:86947342-86965362   | 14.5127  | 15.1987  | 0.0666  | 0.600465 |
| <i>Eid2</i>          | chr7:28267880-28269165    | 2.1761   | 2.4630   | 0.1786  | 0.353872 |
| <i>Gm22133</i>       | chr7:45458088-45458197    | 363.4845 | 420.1839 | 0.2091  | 0.486094 |
| <i>Gm6341</i>        | chr7:101154644-101155055  | 2.3077   | 2.8597   | 0.3094  | 0.399237 |
| <i>Gm4759</i>        | chr7:106421549-106441073  | 108.5767 | 114.5896 | 0.0778  | 0.639596 |
| <i>Pkp3</i>          | chr7:141078217-141090510  | 14.1118  | 12.9639  | -0.1224 | 0.450451 |
| <i>Ccdc166</i>       | chr15:75979871-75982455   | 7.8028   | 8.2153   | 0.0743  | 0.451397 |
| <i>Tonsl</i>         | chr15:76626001-76639958   | 4.7779   | 4.4619   | -0.0987 | 0.095162 |
| <i>Dzip3</i>         | chr16:48924231-48994165   | 5.3986   | 5.0410   | -0.0989 | 0.293993 |
| <i>Cnnm3</i>         | chr1:36511866-36528237    | 5.8961   | 5.4113   | -0.1238 | 0.428079 |
| <i>Fam132b</i>       | chr1:91366429-91374216    | 2.1585   | 1.9011   | -0.1832 | 0.384704 |
| <i>Ppp1r15b</i>      | chr1:133131142-133139783  | 48.3642  | 45.3344  | -0.0933 | 0.381403 |
| <i>Pink1</i>         | chr4:138313408-138326307  | 40.2356  | 34.4224  | -0.2251 | 0.447665 |
| <i>Gtf3c6</i>        | chr10:40249202-40257665   | 20.8696  | 22.7429  | 0.1240  | 0.602114 |
| <i>Gm26541</i>       | chr10:80681837-80687176   | 56.8169  | 53.4561  | -0.0880 | 0.285514 |
| <i>Ric8b</i>         | chr10:84917615-85016446   | 17.6224  | 16.5085  | -0.0942 | 0.240343 |
| <i>1810014B01Rik</i> | chr10:86685600-86694806   | 42.0086  | 38.7465  | -0.1166 | 0.410037 |
| <i>Fancl</i>         | chr11:26386134-26471876   | 8.2387   | 7.5916   | -0.1180 | 0.338112 |
| <i>Cpeb4</i>         | chr11:31872210-31935634   | 7.5038   | 7.0327   | -0.0935 | 0.271692 |
| <i>Clk4</i>          | chr11:51261729-51281766   | 44.0252  | 41.4692  | -0.0863 | 0.311336 |
| <i>Gm12248</i>       | chr11:58063827-58072937   | 1.4026   | 1.7027   | 0.2797  | 0.429096 |
| <i>Gm11192</i>       | chr11:78278737-78279066   | 29.8076  | 25.7699  | -0.2100 | 0.366379 |
| <i>Fn3k</i>          | chr11:121434912-121450491 | 0.1454   | 0.2005   | 0.4635  | 0.499440 |
| <i>Mnat1</i>         | chr12:73123716-73273988   | 9.5407   | 10.0708  | 0.0780  | 0.492138 |
| <i>Gm24853</i>       | chr12:81501239-81501360   | 26.3781  | 22.4489  | -0.2327 | 0.329031 |



|                      |                           |          |          |         |          |
|----------------------|---------------------------|----------|----------|---------|----------|
| <i>Ppp2r5c</i>       | chr12:110485738-110583061 | 68.8715  | 71.2071  | 0.0481  | 0.507729 |
| <i>Abcb8</i>         | chr5:24393662-24410054    | 5.4693   | 5.0557   | -0.1134 | 0.355979 |
| <i>Gpc2</i>          | chr5:138264951-138280005  | 1.0330   | 0.9304   | -0.1510 | 0.277975 |
| <i>Mtpn</i>          | chr6:35508905-35539888    | 58.9495  | 55.5489  | -0.0857 | 0.269231 |
| <i>Gm20426</i>       | chr6:90231727-90232788    | 5.3270   | 6.1557   | 0.2086  | 0.456076 |
| <i>Fbxl14</i>        | chr6:119479667-119483886  | 40.3322  | 38.1863  | -0.0789 | 0.199282 |
| <i>Atf5</i>          | chr7:44812256-44816658    | 2.3702   | 2.0975   | -0.1763 | 0.144223 |
| <i>Pgpep1l</i>       | chr7:68236607-68264233    | 3.3722   | 2.9221   | -0.2067 | 0.230656 |
| <i>Lipt2</i>         | chr7:100159276-100161365  | 1.9100   | 2.1333   | 0.1595  | 0.311539 |
| <i>Sh2b1</i>         | chr7:126466993-126475130  | 17.2362  | 16.1046  | -0.0980 | 0.354822 |
| <i>Zranb1</i>        | chr7:132931141-132986391  | 18.9199  | 19.4061  | 0.0366  | 0.327724 |
| <i>Osbpl5</i>        | chr7:143688761-143756985  | 14.2946  | 13.1649  | -0.1188 | 0.463408 |
| <i>Naf1</i>          | chr8:66860216-66890564    | 1.9328   | 1.6997   | -0.1854 | 0.390548 |
| <i>Tcta</i>          | chr9:108302958-108305951  | 11.4680  | 10.4427  | -0.1351 | 0.403940 |
| <i>Traj14</i>        | chr14:54205110-54205143   | 269.2234 | 292.5495 | 0.1199  | 0.459040 |
| <i>Gm25128</i>       | chr17:35247174-35247250   | 14.6164  | 18.1400  | 0.3116  | 0.368237 |
| <i>Cwf19l1</i>       | chr19:44108643-44135876   | 8.2646   | 8.6948   | 0.0732  | 0.538154 |
| <i>Asnsd1</i>        | chr1:53325506-53352752    | 16.5404  | 17.1586  | 0.0529  | 0.508832 |
| <i>Fam126b</i>       | chr1:58522805-58586323    | 7.3800   | 6.8304   | -0.1117 | 0.416974 |
| <i>Ipo9</i>          | chr1:135382311-135430499  | 12.9615  | 12.2854  | -0.0773 | 0.185170 |
| <i>Axdnd1</i>        | chr1:156323508-156421159  | 0.1816   | 0.1412   | -0.3635 | 0.181086 |
| <i>Eprs</i>          | chr1:185363094-185428355  | 60.9047  | 63.1367  | 0.0519  | 0.541501 |
| <i>Sspata25</i>      | chr2:164826388-164828537  | 1.5421   | 1.2762   | -0.2731 | 0.263460 |
| <i>Nudt6</i>         | chr3:37404909-37420211    | 8.7417   | 9.2179   | 0.0765  | 0.266220 |
| <i>Rxfp4</i>         | chr3:88651897-88653142    | 0.6926   | 0.8669   | 0.3238  | 0.283151 |
| <i>Mtx1</i>          | chr3:89209080-89227088    | 11.9129  | 12.4554  | 0.0643  | 0.540138 |
| <i>Gm12529</i>       | chr4:59532746-59533014    | 10.0473  | 11.7157  | 0.2216  | 0.497489 |
| <i>Gm12932</i>       | chr4:125082856-125084947  | 3.8470   | 3.2205   | -0.2565 | 0.290888 |
| <i>Id3</i>           | chr4:136143496-136145755  | 25.6131  | 23.0860  | -0.1499 | 0.485680 |
| <i>Gm20707</i>       | chr4:147782318-147809840  | 5.6631   | 6.0578   | 0.0972  | 0.538136 |
| <i>3110083C13Rik</i> | chr14:57999322-58003695   | 0.9607   | 0.7114   | -0.4334 | 0.354110 |
| <i>Gm25945</i>       | chr3:88707157-88707292    | 6.6636   | 4.6666   | -0.5139 | 0.507837 |
| <i>Gm13899</i>       | chr6:17711686-17712941    | 0.5145   | 0.6901   | 0.4235  | 0.519177 |
| <i>Rnf41</i>         | chr10:128411615-128441438 | 11.1054  | 10.4863  | -0.0828 | 0.072806 |
| <i>Akr1e1</i>        | chr13:4590756-4609174     | 1.0735   | 0.8834   | -0.2812 | 0.531307 |
| <i>Mccc2</i>         | chr13:99948532-100015639  | 7.1530   | 7.5299   | 0.0741  | 0.362412 |
| <i>Kmt2c</i>         | chr5:25271797-25498783    | 19.6533  | 20.7759  | 0.0801  | 0.655933 |
| <i>Zfp78</i>         | chr7:6371363-6379491      | 2.8108   | 3.0939   | 0.1384  | 0.279751 |
| <i>Ddx19b</i>        | chr8:111003187-111031751  | 10.1629  | 9.5299   | -0.0928 | 0.299701 |
| <i>Plscr1</i>        | chr9:92250056-92271975    | 1.0829   | 1.2666   | 0.2260  | 0.414868 |
| <i>Tubgcp6</i>       | chr15:89098356-89123087   | 14.2888  | 13.5590  | -0.0756 | 0.150079 |
| <i>Mrps18b</i>       | chr17:35910378-35916389   | 9.7942   | 10.2580  | 0.0667  | 0.339481 |
| <i>Spdya</i>         | chr17:71552060-71589533   | 1.6480   | 1.4314   | -0.2032 | 0.149306 |
| <i>Ubald1</i>        | chr16:4874777-4880315     | 11.1695  | 11.6436  | 0.0600  | 0.572975 |
| <i>Dpcd</i>          | chr19:45560614-45578279   | 21.4994  | 19.8920  | -0.1121 | 0.322438 |
| <i>A430106G13Rik</i> | chr1:137966530-137969918  | 0.4643   | 0.3789   | -0.2933 | 0.167242 |
| <i>Gm10036</i>       | chr18:15832793-15833330   | 5.3955   | 6.2224   | 0.2057  | 0.474368 |
| <i>Gtf3c5</i>        | chr2:28566310-28583751    | 3.2197   | 3.4324   | 0.0923  | 0.497580 |
| <i>Topors</i>        | chr4:40259600-40269850    | 27.5625  | 28.4094  | 0.0437  | 0.468100 |
| <i>Txn1</i>          | chr4:57943372-57956411    | 48.3485  | 44.5304  | -0.1187 | 0.404105 |
| <i>Szt2</i>          | chr4:118362742-118409273  | 7.9931   | 7.3223   | -0.1265 | 0.494285 |
| <i>Mapk9</i>         | chr11:49846750-49886421   | 12.9568  | 13.3611  | 0.0443  | 0.528152 |
| <i>Map3k1</i>        | chr13:111746427-111808993 | 31.6088  | 32.6274  | 0.0458  | 0.594296 |
| <i>Rmnd1</i>         | chr10:4401914-4432388     | 6.7314   | 7.0042   | 0.0573  | 0.528876 |
| <i>Aasdh</i>         | chr5:76873658-76905514    | 6.0995   | 6.3008   | 0.0468  | 0.337713 |
| <i>Fam212a</i>       | chr9:107984226-107985879  | 2.4911   | 2.8433   | 0.1908  | 0.496462 |
| <i>Nedd1</i>         | chr10:92684745-92722420   | 13.0245  | 13.5090  | 0.0527  | 0.434843 |
| <i>Gm12238</i>       | chr11:55482705-55482829   | 12.8762  | 15.2531  | 0.2444  | 0.435303 |
| <i>Dvl2</i>          | chr11:7000594-70012301    | 14.2492  | 13.3602  | -0.0929 | 0.288296 |
| <i>Zfp207</i>        | chr11:80383278-80405733   | 83.4605  | 85.3996  | 0.0331  | 0.488691 |
| <i>Fbxo47</i>        | chr11:97853825-97884154   | 0.9354   | 0.7822   | -0.2582 | 0.190032 |
| <i>Srrt</i>          | chr5:137295703-137307674  | 61.0709  | 62.6592  | 0.0370  | 0.493950 |
| <i>Adap1</i>         | chr5:139271875-139325622  | 1.3987   | 1.6022   | 0.1960  | 0.576426 |
| <i>Zfand2a</i>       | chr5:139471210-139484549  | 6.6766   | 6.2150   | -0.1034 | 0.150972 |
| <i>Rpia</i>          | chr6:70765719-70792232    | 7.8220   | 7.2929   | -0.1011 | 0.314085 |
| <i>Gm7363</i>        | chr7:3983786-3984187      | 4.1020   | 4.7787   | 0.2203  | 0.301803 |
| <i>Ccdc61</i>        | chr7:18890882-18910415    | 7.3003   | 6.7033   | -0.1231 | 0.275655 |
| <i>Irgc1</i>         | chr7:24431921-24435534    | 1.5449   | 1.2974   | -0.2519 | 0.413946 |
| <i>Axl</i>           | chr7:25757272-25788705    | 0.6792   | 0.5844   | -0.2169 | 0.336788 |
| <i>Zfp60</i>         | chr7:27731388-27753702    | 5.8968   | 5.5490   | -0.0877 | 0.128591 |
| <i>Spty2d1</i>       | chr7:46990395-47008411    | 17.1514  | 16.3046  | -0.0731 | 0.058155 |

|                      |                           |          |          |         |          |
|----------------------|---------------------------|----------|----------|---------|----------|
| <i>Inpp4b</i>        | chr8:81342555-82125036    | 67.6311  | 69.7460  | 0.0444  | 0.574122 |
| <i>Slc9a5</i>        | chr8:105348257-105369881  | 0.3077   | 0.2435   | -0.3377 | 0.402198 |
| <i>Dcun1d5</i>       | chr9:7184565-7207031      | 65.3954  | 61.0519  | -0.0992 | 0.325265 |
| <i>Foxred1</i>       | chr9:35204205-35211055    | 14.1209  | 13.1842  | -0.0990 | 0.297656 |
| <i>Slc24a1</i>       | chr9:64922860-64951607    | 0.1971   | 0.2434   | 0.3043  | 0.450074 |
| <i>Alas1</i>         | chr9:106233454-106248126  | 8.0807   | 8.4363   | 0.0621  | 0.509527 |
| <i>Mmgt1</i>         | chrX:56585511-56598069    | 8.1125   | 7.5049   | -0.1123 | 0.351827 |
| <i>Mrpl18</i>        | chr17:12911348-12916345   | 30.7633  | 28.3610  | -0.1173 | 0.404522 |
| <i>Ctsw</i>          | chr19:5465239-5468498     | 289.1775 | 299.7253 | 0.0517  | 0.636672 |
| <i>Ptpn7</i>         | chr1:135132724-135145320  | 43.3354  | 41.2650  | -0.0706 | 0.053133 |
| <i>Gm19705</i>       | chr1:136670768-136690804  | 14.5382  | 15.3475  | 0.0781  | 0.544085 |
| <i>Gm14086</i>       | chr2:122427193-122427469  | 21.1826  | 17.8400  | -0.2478 | 0.453537 |
| <i>Gm20458</i>       | chr2:164460966-164490760  | 12.0393  | 10.9556  | -0.1361 | 0.401467 |
| <i>Tmod4</i>         | chr3:95124475-95129209    | 1.7212   | 1.4679   | -0.2297 | 0.327872 |
| <i>Setdb1</i>        | chr3:95323524-95357202    | 17.3654  | 16.4321  | -0.0797 | 0.234369 |
| <i>Pdxdc1</i>        | chr16:13833147-13903131   | 15.3142  | 15.6472  | 0.0310  | 0.381799 |
| <i>Asf1b</i>         | chr8:83955506-83970197    | 4.4813   | 4.7879   | 0.0955  | 0.460977 |
| <i>Gm26916</i>       | chr14:61629483-61630414   | 5.9506   | 6.8810   | 0.2096  | 0.441954 |
| <i>Wdr77</i>         | chr3:105959368-105984600  | 15.8247  | 14.8199  | -0.0946 | 0.372697 |
| <i>Map3k7</i>        | chr4:31964096-32023467    | 18.2024  | 17.2636  | -0.0764 | 0.132047 |
| <i>Gm26640</i>       | chr6:72953235-72957249    | 4.9717   | 5.8652   | 0.2384  | 0.532995 |
| <i>Traj34</i>        | chr14:54184698-54184756   | 45.9521  | 52.6828  | 0.1972  | 0.507754 |
| <i>Z200002D01Rik</i> | chr7:29246560-29248432    | 4.4462   | 4.8846   | 0.1357  | 0.496777 |
| <i>Nipa2</i>         | chr7:55931286-55962476    | 10.4369  | 9.8004   | -0.0908 | 0.271841 |
| <i>Has3</i>          | chr8:106870241-106884566  | 6.7862   | 6.3835   | -0.0883 | 0.171522 |
| <i>Fads1</i>         | chr19:10182887-10196870   | 5.4713   | 5.0890   | -0.1045 | 0.060952 |
| <i>Rps3a3</i>        | chr13:108670579-108671440 | 1.0934   | 1.3546   | 0.3091  | 0.385326 |
| <i>Themis</i>        | chr10:28668359-28883818   | 55.4267  | 57.8224  | 0.0610  | 0.574169 |
| <i>Ascc1</i>         | chr10:60002804-60099990   | 18.6235  | 17.1913  | -0.1154 | 0.347481 |
| <i>Atp5b</i>         | chr10:128083272-128090391 | 184.6666 | 174.7754 | -0.0794 | 0.230206 |
| <i>Pigs</i>          | chr11:78328414-78342782   | 13.6380  | 12.7075  | -0.1019 | 0.300879 |
| <i>Ddx52</i>         | chr11:83942061-83963088   | 35.1866  | 36.5782  | 0.0560  | 0.560735 |
| <i>Stxbp4</i>        | chr11:90476491-90638084   | 0.5735   | 0.5057   | -0.1815 | 0.418153 |
| <i>Nsf</i>           | chr11:103821781-103954056 | 12.2526  | 11.6412  | -0.0738 | 0.080799 |
| <i>Nploc4</i>        | chr11:120380369-120437708 | 14.0393  | 13.2833  | -0.0799 | 0.181006 |
| <i>Nop16</i>         | chr13:54584184-54590090   | 12.4628  | 11.5633  | -0.1081 | 0.250893 |
| <i>Depdc1b</i>       | chr13:108316331-108407782 | 5.0495   | 4.6351   | -0.1235 | 0.320850 |
| <i>Pde6b</i>         | chr5:108388390-108432397  | 1.7335   | 1.5545   | -0.1572 | 0.358591 |
| <i>Itpkc</i>         | chr7:27207171-27228628    | 4.2842   | 3.9286   | -0.1250 | 0.340602 |
| <i>Ankrd42</i>       | chr7:92581722-92637142    | 0.2478   | 0.1935   | -0.3568 | 0.310272 |
| <i>Nup98</i>         | chr7:102134203-102210120  | 29.8655  | 30.6504  | 0.0374  | 0.509366 |
| <i>Plekha7</i>       | chr7:116123492-116308376  | 0.6515   | 0.5713   | -0.1896 | 0.501591 |
| <i>Cfap97</i>        | chr8:46151770-46195590    | 12.0300  | 12.4823  | 0.0532  | 0.503206 |
| <i>Tssk6</i>         | chr8:69902183-69903516    | 4.0262   | 3.4429   | -0.2258 | 0.491604 |
| <i>Map1s</i>         | chr8:70905973-70917526    | 11.6861  | 10.6647  | -0.1319 | 0.495955 |
| <i>Babam1</i>        | chr8:71396854-71404772    | 36.7066  | 34.1680  | -0.1034 | 0.356338 |
| <i>Gpr114</i>        | chr8:94923693-94943290    | 71.3399  | 67.2061  | -0.0861 | 0.301997 |
| <i>Ctsh</i>          | chr9:90054151-90076089    | 0.1961   | 0.2534   | 0.3703  | 0.439909 |
| <i>Faim</i>          | chr9:98986372-99002018    | 24.6318  | 26.0224  | 0.0792  | 0.527675 |
| <i>Ftsj1</i>         | chrX:8238667-8252406      | 2.5357   | 2.7009   | 0.0910  | 0.446238 |
| <i>Firre</i>         | chrX:50555743-50635321    | 1.0002   | 0.7898   | -0.3408 | 0.336374 |
| <i>Zcchc18</i>       | chrX:136993154-136998472  | 1.8251   | 2.0299   | 0.1534  | 0.609259 |
| <i>Alg13</i>         | chrX:144317811-144374450  | 1.7415   | 1.8555   | 0.0915  | 0.363969 |
| <i>Tmem106c</i>      | chr15:97964228-97970286   | 5.4046   | 5.8303   | 0.1094  | 0.462345 |
| <i>9330020H09Rik</i> | chr15:98567323-98569583   | 6.0121   | 5.4460   | -0.1427 | 0.398466 |
| <i>Oxsm</i>          | chr14:16238655-16249808   | 6.7579   | 7.0240   | 0.0557  | 0.322181 |
| <i>Zmym5</i>         | chr14:56790584-56811716   | 14.0298  | 13.2029  | -0.0876 | 0.274308 |
| <i>Gnrh1</i>         | chr14:67745228-67749435   | 3.7934   | 3.1682   | -0.2598 | 0.255155 |
| <i>AI413582</i>      | chr17:27563574-27565749   | 22.2859  | 20.7275  | -0.1046 | 0.262472 |
| <i>Tjap1</i>         | chr17:46257850-46283026   | 5.2790   | 4.7559   | -0.1505 | 0.427706 |
| <i>Map6d1</i>        | chr16:20233309-20241358   | 1.0606   | 0.8939   | -0.2466 | 0.474762 |
| <i>Pdcd4</i>         | chr19:53892230-53929861   | 198.7169 | 186.8032 | -0.0892 | 0.334433 |
| <i>Chpf</i>          | chr1:75474568-75479471    | 8.8954   | 8.1556   | -0.1253 | 0.458616 |
| <i>Tmcc2</i>         | chr1:132356314-132391281  | 0.2170   | 0.2676   | 0.3022  | 0.438887 |
| <i>Cyb5r1</i>        | chr1:134405780-134411740  | 5.1463   | 4.7956   | -0.1018 | 0.131341 |
| <i>Pdk1</i>          | chr2:71873223-71903858    | 66.1964  | 61.9665  | -0.0953 | 0.365020 |
| <i>Sp3</i>           | chr2:72936426-72980446    | 100.2502 | 103.4778 | 0.0457  | 0.527974 |
| <i>Ssrp1</i>         | chr2:85037233-85047109    | 67.7117  | 69.4743  | 0.0371  | 0.498880 |
| <i>Arhgap1</i>       | chr2:91649859-91672326    | 36.1906  | 37.2380  | 0.0412  | 0.543470 |
| <i>Rad51</i>         | chr2:119112792-119147445  | 1.7380   | 1.8498   | 0.0900  | 0.467618 |
| <i>Gm25878</i>       | chr2:167063472-167063565  | 23.6992  | 19.9014  | -0.2520 | 0.215808 |

|                      |                           |          |          |         |          |
|----------------------|---------------------------|----------|----------|---------|----------|
| <i>Gm12630</i>       | chr4:86817793-86818577    | 1.7961   | 2.1548   | 0.2627  | 0.467051 |
| <i>Gm17354</i>       | chr4:108633842-108637441  | 5.9686   | 5.5161   | -0.1137 | 0.228878 |
| <i>Cep170</i>        | chr1:176733652-176807124  | 7.4557   | 7.8772   | 0.0793  | 0.573564 |
| <i>Rhof</i>          | chr5:123103043-123132692  | 21.3269  | 20.0198  | -0.0912 | 0.311685 |
| <i>Ei24</i>          | chr9:36779158-36797393    | 21.0889  | 21.8727  | 0.0526  | 0.482976 |
| <i>Parp3</i>         | chr9:106470321-106476949  | 22.1813  | 20.5509  | -0.1101 | 0.449722 |
| <i>Vac14</i>         | chr8:110618637-110720396  | 14.8550  | 15.4813  | 0.0596  | 0.559578 |
| <i>Ubl4</i>          | chrX:74365717-74373218    | 9.8077   | 10.1884  | 0.0549  | 0.414207 |
| <i>Gla</i>           | chrX:134588148-134601125  | 4.7397   | 4.3644   | -0.1190 | 0.199676 |
| <i>Spryd7</i>        | chr14:61531992-61556886   | 4.8517   | 4.4790   | -0.1153 | 0.251137 |
| <i>Slain1</i>        | chr14:103650227-103704907 | 25.3542  | 26.1346  | 0.0437  | 0.520042 |
| <i>Thumpd2</i>       | chr17:81026326-81065085   | 11.6711  | 10.8687  | -0.1028 | 0.115192 |
| <i>Ncoa2</i>         | chr1:13139104-13374083    | 13.5637  | 13.9887  | 0.0445  | 0.606834 |
| <i>3110067C02Rik</i> | chrX:150463725-150466156  | 0.3278   | 0.4155   | 0.3422  | 0.251083 |
| <i>Fbxl20</i>        | chr11:98082555-98150403   | 12.2943  | 11.5713  | -0.0874 | 0.364701 |
| <i>Gm17056</i>       | chr12:40198655-40201105   | 0.6534   | 0.7760   | 0.2481  | 0.442368 |
| <i>Acot2</i>         | chr12:83987860-83993873   | 7.6952   | 7.1076   | -0.1146 | 0.250347 |
| <i>Ccdc125</i>       | chr13:100669480-100697240 | 16.5154  | 15.5015  | -0.0914 | 0.233214 |
| <i>Mypop</i>         | chr7:18991244-19001766    | 2.7678   | 2.4114   | -0.1989 | 0.446158 |
| <i>Slc30a7</i>       | chr3:115938972-116007406  | 15.1090  | 15.6645  | 0.0521  | 0.597621 |
| <i>Apoh</i>          | chr11:108343353-108414396 | 0.9167   | 1.1124   | 0.2791  | 0.494284 |
| <i>Bcl2l14</i>       | chr6:134396317-134438736  | 0.2990   | 0.2364   | -0.3387 | 0.293206 |
| <i>Traj44</i>        | chr14:54173689-54173750   | 31.0387  | 25.8126  | -0.2660 | 0.228066 |
| <i>Ranbp2</i>        | chr10:58446851-58494155   | 75.5172  | 78.3471  | 0.0531  | 0.579726 |
| <i>E2f7</i>          | chr10:110745438-110787384 | 0.1276   | 0.1609   | 0.3349  | 0.559840 |
| <i>Nup107</i>        | chr10:117750623-117792705 | 24.2012  | 24.9812  | 0.0458  | 0.519560 |
| <i>Mmd</i>           | chr11:90187683-90278589   | 8.8884   | 8.3672   | -0.0872 | 0.207885 |
| <i>Mrpl27</i>        | chr11:94653766-94660089   | 9.1533   | 9.8093   | 0.0999  | 0.494034 |
| <i>Fam104a</i>       | chr11:113661318-113684155 | 12.1568  | 11.3443  | -0.0998 | 0.311544 |
| <i>Cdc42ep4</i>      | chr11:113726849-113751881 | 0.4776   | 0.3973   | -0.2655 | 0.073520 |
| <i>Tecpr2</i>        | chr12:110889263-110972394 | 3.6122   | 3.3544   | -0.1068 | 0.353786 |
| <i>Rcor1</i>         | chr12:111039350-111115901 | 17.5757  | 16.4089  | -0.0991 | 0.414458 |
| <i>2010107E04Rik</i> | chr12:111961375-111966977 | 124.2636 | 112.5653 | -0.1426 | 0.488447 |
| <i>Gm6768</i>        | chr12:119260933-119264272 | 0.4007   | 0.4771   | 0.2517  | 0.298022 |
| <i>Mrpl33</i>        | chr5:31596934-31701972    | 11.2160  | 10.5025  | -0.0948 | 0.332597 |
| <i>Rilpl1</i>        | chr5:124493081-124531391  | 0.7955   | 0.6208   | -0.3578 | 0.504606 |
| <i>Trbj2-3</i>       | chr6:41543222-41543271    | 202.8201 | 221.2907 | 0.1257  | 0.553397 |
| <i>Cacna2d4</i>      | chr6:119236525-119352407  | 4.9608   | 5.1763   | 0.0614  | 0.517061 |
| <i>NA</i>            | chr7:100545755-100547620  | 0.7474   | 0.8985   | 0.2657  | 0.457136 |
| <i>Gm7389</i>        | chr8:3994627-3997505      | 1.6258   | 1.8205   | 0.1632  | 0.483742 |
| <i>Chtf8</i>         | chr8:106883862-106893601  | 52.9370  | 50.2976  | -0.0738 | 0.117446 |
| <i>Epm2aip1</i>      | chr9:111271844-111279089  | 20.1512  | 18.8785  | -0.0941 | 0.369498 |
| <i>Slc6a8</i>        | chrX:73673149-73682502    | 0.3991   | 0.4698   | 0.2345  | 0.475211 |
| <i>Fam173b</i>       | chr15:31601851-31621227   | 5.7263   | 5.3251   | -0.1048 | 0.315658 |
| <i>Pick1</i>         | chr15:79229172-79256674   | 3.2406   | 2.9938   | -0.1143 | 0.386138 |
| <i>Pdgfb</i>         | chr15:79995899-80014808   | 1.4241   | 1.6709   | 0.2305  | 0.563680 |
| <i>Zmiz1</i>         | chr14:25459184-25666743   | 1.8473   | 2.0354   | 0.1399  | 0.654720 |
| <i>Ap5m1</i>         | chr14:49066494-49087723   | 22.5880  | 21.1253  | -0.0966 | 0.334063 |
| <i>Cdh24</i>         | chr14:54631991-54641364   | 1.5862   | 1.3934   | -0.1870 | 0.288585 |
| <i>Gm1976</i>        | chr17:94759943-94834799   | 3.3213   | 3.6209   | 0.1246  | 0.477189 |
| <i>Fam86</i>         | chr16:5244151-5255983     | 14.1945  | 14.7477  | 0.0552  | 0.450259 |
| <i>Gm24336</i>       | chr19:44113978-44114124   | 190.8769 | 225.1151 | 0.2380  | 0.517759 |
| <i>Peo1</i>          | chr19:45006557-45012762   | 7.4631   | 6.9566   | -0.1014 | 0.221206 |
| <i>Mrpl15</i>        | chr1:4773205-4785739      | 11.8757  | 11.0473  | -0.1043 | 0.369937 |
| <i>Acsl3</i>         | chr1:78657824-78706987    | 2.8990   | 3.1440   | 0.1171  | 0.516939 |
| <i>Smyd3</i>         | chr1:178951959-179518041  | 4.7476   | 4.9347   | 0.0558  | 0.505625 |
| <i>Sde2</i>          | chr1:180851150-180868097  | 16.4101  | 15.4294  | -0.0889 | 0.203611 |
| <i>Urm1</i>          | chr2:29820074-29845002    | 7.4825   | 7.8107   | 0.0619  | 0.523814 |
| <i>Slc4a10</i>       | chr2:62046461-62326730    | 1.2091   | 1.3131   | 0.1190  | 0.485081 |
| <i>Ssfa2</i>         | chr2:79635351-79672966    | 6.2302   | 5.7803   | -0.1081 | 0.390592 |
| <i>Gm14125</i>       | chr2:150305527-150306516  | 1.0522   | 0.7969   | -0.4009 | 0.408751 |
| <i>Actr5</i>         | chr2:158624887-158639211  | 10.3244  | 9.6302   | -0.1004 | 0.334820 |
| <i>Gm16093</i>       | chr3:19227779-19240987    | 40.8126  | 43.9047  | 0.1054  | 0.608789 |
| <i>Wdr3</i>          | chr3:100138179-100162407  | 26.5811  | 25.0771  | -0.0840 | 0.285086 |
| <i>Arhgap29</i>      | chr3:121953228-122016677  | 0.5611   | 0.6632   | 0.2413  | 0.574113 |
| <i>Gm12940</i>       | chr4:127033730-127049398  | 35.7426  | 33.4372  | -0.0962 | 0.376060 |
| <i>Gm24362</i>       | chr4:136018070-136018486  | 2.2747   | 2.8511   | 0.3258  | 0.449700 |
| <i>Kmt2d</i>         | chr15:98831668-98871204   | 8.9878   | 10.5131  | 0.2262  | 0.532889 |
| <i>Gm13939</i>       | chr2:109902395-109913319  | 1.4996   | 1.7765   | 0.2444  | 0.488459 |
| <i>2210016F16Rik</i> | chr13:58380045-58385225   | 18.8216  | 19.5392  | 0.0540  | 0.538028 |
| <i>Tyms</i>          | chr5:30058201-30073617    | 1.6241   | 1.8138   | 0.1594  | 0.644965 |

|                      |                           |           |           |         |          |
|----------------------|---------------------------|-----------|-----------|---------|----------|
| <i>Fam196b</i>       | chr11:34314821-34422640   | 12.5356   | 13.5012   | 0.1071  | 0.671898 |
| <i>Ghdc</i>          | chr11:100766031-100770957 | 1.6663    | 1.4543    | -0.1963 | 0.314028 |
| <i>H2-Q7</i>         | chr17:35439154-35443773   | 75.0692   | 70.5661   | -0.0892 | 0.367064 |
| <i>Gm26917</i>       | chr17:39843012-39846341   | 2745.6406 | 3241.4705 | 0.2395  | 0.535521 |
| <i>Cebpzos</i>       | chr17:78916498-78921037   | 13.3907   | 12.2868   | -0.1241 | 0.349753 |
| <i>Sord</i>          | chr2:122234748-122265340  | 0.8344    | 0.7009    | -0.2515 | 0.208164 |
| <i>Mfsd1</i>         | chr3:67582767-67604231    | 25.3617   | 23.9431   | -0.0830 | 0.236639 |
| <i>Thap3</i>         | chr4:151982638-151988997  | 19.3368   | 17.9508   | -0.1073 | 0.323221 |
| <i>Rad50</i>         | chr11:53649518-53707319   | 23.7234   | 24.5186   | 0.0476  | 0.553867 |
| <i>Yipf2</i>         | chr9:21588708-21592831    | 15.3051   | 14.3422   | -0.0938 | 0.226989 |
| <i>Nsg1</i>          | chr5:38137192-38159467    | 0.7639    | 0.8832    | 0.2093  | 0.066506 |
| <i>Gm16174</i>       | chr7:19816552-19818625    | 2.9793    | 3.5484    | 0.2522  | 0.359969 |
| <i>Mmachc</i>        | chr4:116702278-116708406  | 4.4876    | 4.8468    | 0.1111  | 0.517915 |
| <i>Fiz1</i>          | chr7:5007056-5014697      | 10.9120   | 10.2166   | -0.0950 | 0.205680 |
| <i>Tbcd</i>          | chr11:121451948-121617164 | 14.1943   | 13.3769   | -0.0856 | 0.335906 |
| <i>Ccdc175</i>       | chr12:72101291-72185029   | 0.6633    | 0.5289    | -0.3268 | 0.408101 |
| <i>Zhx2</i>          | chr15:57694664-57839833   | 10.2233   | 9.5682    | -0.0955 | 0.332975 |
| <i>Adal</i>          | chr2:121140427-121156680  | 7.7400    | 7.1634    | -0.1117 | 0.422367 |
| <i>Fnip2</i>         | chr3:79455970-79567796    | 0.2136    | 0.1767    | -0.2729 | 0.198893 |
| <i>Abhd10</i>        | chr16:45729724-45742955   | 4.7157    | 5.0161    | 0.0891  | 0.586254 |
| <i>Ofd1</i>          | chrX:166390032-166440704  | 11.6676   | 11.9760   | 0.0376  | 0.311096 |
| <i>Cdk19os</i>       | chr10:40348507-40350103   | 1.2220    | 1.5111    | 0.3063  | 0.518914 |
| <i>Dennd4b</i>       | chr3:90265184-90280669    | 18.7104   | 17.3146   | -0.1119 | 0.476626 |
| <i>Rnase6</i>        | chr14:51129067-51131122   | 0.9367    | 0.7139    | -0.3919 | 0.384092 |
| <i>Rab1b</i>         | chr19:5099206-5106996     | 53.0719   | 54.9517   | 0.0502  | 0.554050 |
| <i>Gm26387</i>       | chr5:107907344-107907476  | 14.1920   | 11.4346   | -0.3117 | 0.412122 |
| <i>Znhit2</i>        | chr19:6061191-6062470     | 15.1467   | 13.7378   | -0.1409 | 0.456515 |
| <i>Luc7l</i>         | chr17:26252909-26285504   | 25.9576   | 24.5631   | -0.0797 | 0.276462 |
| <i>Tomm40</i>        | chr7:19701312-19715438    | 12.2151   | 11.4015   | -0.0994 | 0.322822 |
| <i>Xk</i>            | chrX:9272755-9313250      | 0.7697    | 0.6710    | -0.1981 | 0.324142 |
| <i>Scrib</i>         | chr15:76047157-76069784   | 9.8809    | 9.3076    | -0.0862 | 0.283439 |
| <i>Hmga1</i>         | chr17:27556619-27563674   | 4.9403    | 5.2995    | 0.1013  | 0.479797 |
| <i>Ndufs1</i>        | chr1:63143595-63176822    | 33.1017   | 31.1437   | -0.0880 | 0.306708 |
| <i>Rpap1</i>         | chr2:119763303-119787537  | 7.0688    | 6.5338    | -0.1135 | 0.453870 |
| <i>Fam132a</i>       | chr4:155962317-155966629  | 1.9668    | 1.6816    | -0.2260 | 0.262245 |
| <i>Actr10</i>        | chr12:70937856-70964718   | 21.2699   | 19.4218   | -0.1311 | 0.509101 |
| <i>Srd5a3</i>        | chr5:76140270-76155504    | 6.9000    | 6.4736    | -0.0920 | 0.200143 |
| <i>Snord65</i>       | chr11:62604514-62604586   | 19.7260   | 16.0511   | -0.2974 | 0.145553 |
| <i>Gm20536</i>       | chr6:72609835-72616190    | 61.8008   | 64.1574   | 0.0540  | 0.189640 |
| <i>Glyctk</i>        | chr9:106152856-106158138  | 4.4433    | 4.0657    | -0.1281 | 0.391580 |
| <i>Arap2</i>         | chr5:62602444-62766198    | 26.5120   | 27.2971   | 0.0421  | 0.557094 |
| <i>Pi4ka</i>         | chr16:17280350-17406314   | 15.6553   | 14.7248   | -0.0884 | 0.390159 |
| <i>Drap1</i>         | chr19:5422804-5424979     | 47.1639   | 50.2952   | 0.0927  | 0.630022 |
| <i>4930556J24Rik</i> | chr11:3937540-3976778     | 5.5201    | 5.9943    | 0.1189  | 0.421930 |
| <i>1110057K04Rik</i> | chr12:8208106-8285758     | 17.7119   | 18.2585   | 0.0438  | 0.430116 |
| <i>Timm13</i>        | chr10:80899449-80900969   | 24.3051   | 22.2279   | -0.1289 | 0.438670 |
| <i>Rps12-ps26</i>    | chr11:107171899-107172232 | 2.2807    | 2.8470    | 0.3200  | 0.369819 |
| <i>Fbxo8</i>         | chr8:56551089-56592393    | 10.4607   | 10.9275   | 0.0630  | 0.547539 |
| <i>Fchsdl</i>        | chr18:37957430-37969774   | 6.5358    | 6.9087    | 0.0800  | 0.601353 |
| <i>Zcchc8</i>        | chr5:123698301-123721044  | 17.9975   | 18.4417   | 0.0352  | 0.374895 |
| <i>Gm26782</i>       | chr14:50870363-50879003   | 6.6388    | 6.1846    | -0.1022 | 0.028169 |
| <i>Gm16541</i>       | chr19:42536849-42563108   | 12.1721   | 13.2294   | 0.1202  | 0.497976 |
| <i>Klhl17</i>        | chr4:156229043-156234857  | 11.6573   | 10.9740   | -0.0871 | 0.108383 |
| <i>Gm11999</i>       | chr11:11642202-11685400   | 4.9211    | 4.2764    | -0.2026 | 0.348121 |
| <i>Naa38</i>         | chr11:69395486-69396680   | 18.8013   | 20.2376   | 0.1062  | 0.570881 |
| <i>Gm26890</i>       | chr7:19597292-19602294    | 1.9252    | 2.0884    | 0.1174  | 0.419932 |
| <i>Huwe1</i>         | chrX:151800806-151935417  | 31.3052   | 32.5901   | 0.0580  | 0.659875 |
| <i>Wtap</i>          | chr17:12966795-12992546   | 22.4773   | 21.2625   | -0.0802 | 0.251600 |
| <i>Gm7580</i>        | chr7:74392697-74411233    | 2.6230    | 3.1313    | 0.2555  | 0.396667 |
| <i>NA</i>            | chr13:106833859-106847267 | 4.0181    | 3.5907    | -0.1622 | 0.311896 |
| <i>Efcab9</i>        | chr11:32522750-32532081   | 2.2876    | 1.9481    | -0.2318 | 0.186809 |
| <i>Zfp874b</i>       | chr13:67471513-67484225   | 16.8385   | 15.6665   | -0.1041 | 0.418386 |
| <i>Gm11517</i>       | chr11:96795438-96795825   | 2.1774    | 1.6443    | -0.4051 | 0.350391 |
| <i>Gm5434</i>        | chr12:36090378-36091829   | 0.8260    | 0.6699    | -0.3023 | 0.134975 |
| <i>Irf4</i>          | chr13:30749225-30766927   | 3.6634    | 3.9494    | 0.1084  | 0.619093 |
| <i>N4bp2</i>         | chr5:65763520-65830108    | 12.8116   | 12.1014   | -0.0823 | 0.311522 |
| <i>Morn3</i>         | chr5:123035768-123047016  | 0.8834    | 0.7046    | -0.3264 | 0.237547 |
| <i>Opn1sw</i>        | chr6:29376670-29388468    | 0.5600    | 0.6666    | 0.2513  | 0.385020 |
| <i>Emg1</i>          | chr6:124704380-124712178  | 117.7986  | 109.0943  | -0.1107 | 0.444773 |
| <i>Rhpn2</i>         | chr7:35334174-35392285    | 0.4796    | 0.5486    | 0.1938  | 0.217527 |
| <i>Mesdc2</i>        | chr7:83884465-83901532    | 11.4447   | 10.7770   | -0.0867 | 0.203172 |

|               |                           |          |          |         |          |
|---------------|---------------------------|----------|----------|---------|----------|
| 4632427E13Rik | chr7:92734165-92741468    | 18.9291  | 19.5887  | 0.0494  | 0.585287 |
| Pagr1a        | chr7:127001481-127020327  | 9.7574   | 10.1282  | 0.0538  | 0.493918 |
| 4930512H18Rik | chr8:61849005-61922834    | 4.1481   | 4.6300   | 0.1586  | 0.596652 |
| Dok4          | chr8:94863827-94876312    | 2.1072   | 1.8655   | -0.1758 | 0.322609 |
| Stt3b         | chr9:115242606-115310421  | 48.5507  | 45.9020  | -0.0809 | 0.317465 |
| Arhgef9       | chrX:95048934-95196821    | 0.1592   | 0.1894   | 0.2502  | 0.437121 |
| Nhs12         | chrX:101849384-102092055  | 0.0505   | 0.0636   | 0.3320  | 0.452727 |
| Pacsin2       | chr15:83375606-83464606   | 5.9113   | 5.4707   | -0.1118 | 0.341063 |
| Cideb         | chr14:55754044-55758458   | 3.0608   | 2.7066   | -0.1774 | 0.158279 |
| Pdpk1         | chr17:24073679-24150924   | 20.3824  | 19.2782  | -0.0803 | 0.304616 |
| Gm9806        | chr19:16780546-16781103   | 16.8457  | 15.3205  | -0.1369 | 0.244326 |
| Gm9929        | chr1:170868644-170881721  | 7.4379   | 7.8689   | 0.0813  | 0.393885 |
| Tsc1          | chr2:28641227-28691167    | 6.5258   | 6.1680   | -0.0813 | 0.277916 |
| Gm14471       | chr2:30306066-30323986    | 3.9137   | 3.5036   | -0.1597 | 0.449139 |
| Gm10130       | chr2:150323701-150363071  | 7.4925   | 8.6785   | 0.2120  | 0.495671 |
| Nsfl1c        | chr2:151494181-151511414  | 11.2385  | 11.7066  | 0.0589  | 0.551551 |
| Gm14270       | chr2:170285034-170285880  | 0.8177   | 1.0424   | 0.3503  | 0.338041 |
| Alg2          | chr4:47465066-47474333    | 8.6333   | 7.9885   | -0.1120 | 0.417033 |
| Mink1         | chr11:70562880-70614483   | 9.9614   | 10.5342  | 0.0807  | 0.639003 |
| Gm15800       | chr5:121220218-121368577  | 9.5629   | 8.8158   | -0.1174 | 0.505028 |
| Zfp94         | chr7:24301703-24316666    | 3.2296   | 2.9158   | -0.1474 | 0.386820 |
| Nkap          | chrX:37126794-37150746    | 10.5639  | 9.8690   | -0.0982 | 0.344655 |
| Bzw1          | chr1:58393135-58406548    | 91.4403  | 85.4667  | -0.0975 | 0.415129 |
| Bcs1l         | chr1:74588288-74592443    | 7.5724   | 8.0358   | 0.0857  | 0.524287 |
| Trip12        | chr1:84721188-84839304    | 65.9890  | 67.4185  | 0.0309  | 0.535435 |
| BC029722      | chr2:155817729-155819426  | 14.6058  | 15.4082  | 0.0771  | 0.543705 |
| B4galt5       | chr2:167298443-167349183  | 15.2422  | 16.3533  | 0.1015  | 0.676088 |
| Nudt2         | chr4:41465150-41480926    | 5.2181   | 5.8499   | 0.1649  | 0.494644 |
| Gm4258        | chr1:137898594-138000384  | 1.7038   | 1.9361   | 0.1844  | 0.449601 |
| Rnu3a         | chr10:40258466-40258678   | 340.9382 | 275.4329 | -0.3078 | 0.470368 |
| Rnf185        | chr11:3415981-3452363     | 9.0877   | 9.4815   | 0.0612  | 0.486548 |
| Gm12188       | chr11:49088233-49088543   | 6.7540   | 7.9467   | 0.2346  | 0.542026 |
| Arfp2         | chr7:105634202-105640416  | 7.8377   | 7.3075   | -0.1011 | 0.343476 |
| 9530052E02Rik | chr8:11007849-11054541    | 0.6065   | 0.7489   | 0.3042  | 0.558767 |
| 0610037L13Rik | chr4:107889812-107899384  | 10.6216  | 10.9081  | 0.0384  | 0.467123 |
| Nsun2         | chr13:69533745-69635780   | 39.6620  | 37.6763  | -0.0741 | 0.213635 |
| Spry1         | chr3:37639946-37644598    | 0.8640   | 0.7283   | -0.2464 | 0.358933 |
| Tigd2         | chr6:59208869-59212033    | 33.3355  | 34.4766  | 0.0486  | 0.527691 |
| 9330160F10Rik | chr11:69057717-69060483   | 4.0530   | 4.3288   | 0.0950  | 0.506089 |
| Snx6          | chr12:54746348-54795703   | 42.0201  | 38.9631  | -0.1090 | 0.442326 |
| Atp11a        | chr8:12757013-12868728    | 3.0735   | 3.2831   | 0.0952  | 0.664197 |
| Gm23202       | chr5:146835143-146835272  | 22.4193  | 25.1941  | 0.1683  | 0.422329 |
| Gm16568       | chr9:15330572-15335345    | 17.3103  | 18.0826  | 0.0630  | 0.591048 |
| Inpp5d        | chr1:87620311-87720507    | 23.8648  | 24.4857  | 0.0371  | 0.603750 |
| Crem          | chr18:3266047-3337748     | 1.8948   | 2.0153   | 0.0889  | 0.382103 |
| Fam129c       | chr8:71597647-71607936    | 1.8571   | 1.6817   | -0.1432 | 0.022100 |
| Cyb5d2        | chr11:72777231-72796142   | 2.0721   | 1.8965   | -0.1277 | 0.160569 |
| Fscn2         | chr11:120361533-120368168 | 0.5247   | 0.4109   | -0.3525 | 0.377677 |
| Slc25a1       | chr16:17925210-17928219   | 9.6209   | 10.2736  | 0.0947  | 0.595867 |
| Rcl1          | chr19:29101374-29143843   | 22.6653  | 21.2245  | -0.0948 | 0.248717 |
| Stk4          | chr2:164070321-164155524  | 133.5933 | 137.0036 | 0.0364  | 0.536835 |
| Ankrd6        | chr4:32804034-32950841    | 0.5948   | 0.6720   | 0.1759  | 0.519195 |
| Eif4enif1     | chr11:3202391-3244588     | 9.0431   | 9.3638   | 0.0503  | 0.562017 |
| Lrpap1        | chr5:35091489-35105766    | 12.6527  | 11.9025  | -0.0882 | 0.232688 |
| 6430550D23Rik | chr2:155973278-156007977  | 4.2177   | 3.9256   | -0.1035 | 0.248238 |
| Spice1        | chr16:44347120-44388497   | 13.3610  | 13.9335  | 0.0605  | 0.637430 |
| Mmp11         | chr10:75923221-75932502   | 1.2712   | 1.0440   | -0.2840 | 0.518582 |
| C78197        | chr11:68192192-68196153   | 0.3314   | 0.2477   | -0.4199 | 0.509986 |
| Ctc1          | chr11:69015910-69036473   | 2.9223   | 3.0693   | 0.0708  | 0.574273 |
| Baiap2l1      | chr5:144264525-144358112  | 0.5270   | 0.6283   | 0.2536  | 0.536163 |
| Tmcc3         | chr10:94311948-94590956   | 0.1902   | 0.1532   | -0.3120 | 0.351643 |
| Ndrp1         | chr15:66929320-66969640   | 4.0709   | 4.2787   | 0.0718  | 0.553329 |
| Cd2ap         | chr17:42792950-42876424   | 22.7637  | 23.5346  | 0.0481  | 0.549599 |
| Trav8d-2      | chr14:53042427-53042891   | 2.9700   | 3.6304   | 0.2897  | 0.456665 |
| Dnajc2        | chr5:21757266-21785251    | 22.5939  | 23.6531  | 0.0661  | 0.607612 |
| Mmab          | chr5:114431033-114444059  | 4.8782   | 4.4650   | -0.1277 | 0.378417 |
| Lace1         | chr10:42312584-42478565   | 3.7011   | 3.9656   | 0.0996  | 0.472062 |
| Pomt1         | chr2:32236589-32255005    | 1.9120   | 1.7490   | -0.1285 | 0.320016 |
| Pip4k2c       | chr10:127197066-127211622 | 15.5677  | 14.6939  | -0.0833 | 0.224610 |
| Ccdc42b       | chr5:120628334-120634235  | 1.0290   | 1.2518   | 0.2828  | 0.306627 |
| Acad11        | chr9:104040661-104127463  | 6.8743   | 6.3207   | -0.1211 | 0.425218 |

|                      |                           |          |          |         |          |
|----------------------|---------------------------|----------|----------|---------|----------|
| <i>Kifc1</i>         | chr17:33875665-33890661   | 1.3934   | 1.2247   | -0.1862 | 0.397744 |
| <i>Rab11fip1</i>     | chr8:27138772-27174646    | 8.1792   | 7.6956   | -0.0879 | 0.344494 |
| <i>Tspan13</i>       | chr12:36014556-36042500   | 37.1140  | 34.7532  | -0.0948 | 0.366386 |
| <i>Gm16253</i>       | chr3:96576983-96580663    | 4.9779   | 4.1400   | -0.2659 | 0.464560 |
| <i>Usp34</i>         | chr11:23306894-23490560   | 16.7396  | 17.6266  | 0.0745  | 0.673246 |
| <i>Eno3</i>          | chr11:70657201-70662513   | 10.1952  | 10.7528  | 0.0768  | 0.585620 |
| <i>Mob1b</i>         | chr5:88720854-88762058    | 3.0535   | 2.8180   | -0.1158 | 0.465203 |
| <i>Usp39</i>         | chr6:72318677-72345184    | 27.0174  | 27.9243  | 0.0476  | 0.513816 |
| <i>Cbr4</i>          | chr8:61487733-61503482    | 3.9541   | 3.5647   | -0.1496 | 0.436924 |
| <i>A630014C17Rik</i> | chr11:52276054-52286179   | 5.8798   | 5.3708   | -0.1306 | 0.454774 |
| <i>Kit</i>           | chr5:75574915-75656722    | 0.2827   | 0.3523   | 0.3173  | 0.610299 |
| <i>Inpp4a</i>        | chr1:37299864-37410736    | 3.2844   | 3.0303   | -0.1162 | 0.434592 |
| <i>Luc7l3</i>        | chr11:94287889-94321988   | 63.2975  | 60.1392  | -0.0738 | 0.250681 |
| <i>Poc5</i>          | chr13:96388293-96415587   | 13.0408  | 13.5250  | 0.0526  | 0.511592 |
| <i>Meis3</i>         | chr7:16175089-16186510    | 6.7901   | 6.1756   | -0.1368 | 0.475399 |
| <i>Wdr75</i>         | chr1:45795165-45823619    | 23.2721  | 23.9906  | 0.0439  | 0.543751 |
| <i>Snrpa</i>         | chr7:27187004-27196271    | 13.7965  | 14.6119  | 0.0828  | 0.579401 |
| <i>Ctnnal1</i>       | chr4:56810934-56865188    | 0.2492   | 0.2102   | -0.2458 | 0.131313 |
| <i>Rtn4</i>          | chr11:29692946-29744331   | 12.7999  | 13.0996  | 0.0334  | 0.353075 |
| <i>Alkbh5</i>        | chr11:60536380-60558512   | 17.8890  | 16.9647  | -0.0765 | 0.237967 |
| <i>Gm11583</i>       | chr11:97160989-97161675   | 50.2523  | 46.9411  | -0.0983 | 0.151659 |
| <i>Apopt1</i>        | chr12:111713260-111754980 | 6.2094   | 6.6427   | 0.0973  | 0.582073 |
| <i>Kdm1b</i>         | chr13:47043498-47084613   | 17.4278  | 16.4525  | -0.0831 | 0.235233 |
| <i>Gm8546</i>        | chr13:89577154-89578413   | 0.6774   | 0.5052   | -0.4232 | 0.365101 |
| <i>Crot</i>          | chr5:8966032-8997324      | 17.1717  | 16.2752  | -0.0774 | 0.171578 |
| <i>Gm1043</i>        | chr5:37185896-37193023    | 1.2768   | 1.0778   | -0.2445 | 0.209199 |
| <i>NA</i>            | chr5:105323790-105343929  | 5.2334   | 5.6585   | 0.1127  | 0.558483 |
| <i>Ap4m1</i>         | chr5:138172001-138178708  | 5.9302   | 5.5187   | -0.1038 | 0.214282 |
| <i>Cnbp</i>          | chr6:87842614-87851106    | 155.6604 | 162.4434 | 0.0615  | 0.612093 |
| <i>Bms1</i>          | chr6:118383382-118419417  | 40.9913  | 41.9946  | 0.0349  | 0.465326 |
| <i>Sympk</i>         | chr7:19024376-19054618    | 17.3235  | 16.2960  | -0.0882 | 0.398367 |
| <i>Ppp1r37</i>       | chr7:19530966-19562398    | 15.4846  | 14.5044  | -0.0943 | 0.370890 |
| <i>Iqgap1</i>        | chr7:80711582-80803331    | 99.1734  | 94.7219  | -0.0663 | 0.206407 |
| <i>Tusc3</i>         | chr8:39005866-39165112    | 27.0443  | 25.2362  | -0.0998 | 0.343157 |
| <i>Cc2d1a</i>        | chr8:84132827-84147936    | 12.5984  | 13.0207  | 0.0476  | 0.539519 |
| <i>Fam192a</i>       | chr8:94574942-94601726    | 32.0914  | 33.2669  | 0.0519  | 0.539778 |
| <i>Birc3</i>         | chr9:7848698-7873186      | 19.8060  | 20.2866  | 0.0346  | 0.492837 |
| <i>Rps11-ps1</i>     | chr9:59471758-59472233    | 5.0401   | 4.2693   | -0.2395 | 0.368528 |
| <i>Lrrk2</i>         | chr15:91673174-91816120   | 0.0962   | 0.1178   | 0.2915  | 0.531137 |
| <i>Atp8a2</i>        | chr14:59647530-60197179   | 0.5803   | 0.6593   | 0.1841  | 0.590511 |
| <i>Noxo1</i>         | chr17:24696233-24700529   | 1.0087   | 0.8757   | -0.2041 | 0.161619 |
| <i>Dhx16</i>         | chr17:35879818-35892670   | 42.2383  | 40.0105  | -0.0782 | 0.264434 |
| <i>Olfr755-ps1</i>   | chr17:37276647-37278105   | 3.2312   | 3.5864   | 0.1504  | 0.263307 |
| <i>Taf8</i>          | chr17:47488049-47502287   | 27.0952  | 27.9829  | 0.0465  | 0.563333 |
| <i>Gpr137</i>        | chr19:6938068-6942450     | 4.3581   | 4.6680   | 0.0991  | 0.548370 |
| <i>Mrp130</i>        | chr1:37890476-37898535    | 32.6729  | 34.1193  | 0.0625  | 0.585247 |
| <i>Il1rl2</i>        | chr1:40324626-40365471    | 4.3819   | 3.9803   | -0.1387 | 0.328587 |
| <i>Gm7785</i>        | chr1:91296044-91296936    | 0.7811   | 0.9636   | 0.3030  | 0.036758 |
| <i>D1Ert622e</i>     | chr1:97643902-97662074    | 7.5185   | 7.8431   | 0.0610  | 0.504377 |
| <i>NA</i>            | chr1:153905300-153916910  | 1.3199   | 1.7585   | 0.4139  | 0.474748 |
| <i>Suco</i>          | chr1:161816111-161876661  | 22.6080  | 23.3476  | 0.0464  | 0.619273 |
| <i>Prelid2</i>       | chr18:41875695-41951194   | 3.8905   | 4.4424   | 0.1914  | 0.501118 |
| <i>Nedd4l</i>        | chr18:64887755-65217826   | 4.9927   | 4.6953   | -0.0886 | 0.229248 |
| <i>Cep76</i>         | chr18:67617396-67641336   | 4.2955   | 3.9920   | -0.1057 | 0.203277 |
| <i>4930426L09Rik</i> | chr2:18998342-18999801    | 1.5395   | 1.7882   | 0.2160  | 0.570890 |
| <i>Gm13433</i>       | chr2:25543478-25543718    | 3.9619   | 3.1175   | -0.3458 | 0.226706 |
| <i>Slc12a6</i>       | chr2:112265824-112363163  | 23.1110  | 21.8872  | -0.0785 | 0.334276 |
| <i>Chst14</i>        | chr2:118926496-118928585  | 1.7372   | 1.9307   | 0.1524  | 0.417429 |
| <i>Zfyve19</i>       | chr2:119208616-119217049  | 8.6439   | 8.9599   | 0.0518  | 0.413716 |
| <i>Myef2</i>         | chr2:125084627-125123661  | 6.7761   | 7.0349   | 0.0541  | 0.534597 |
| <i>Lrrn4</i>         | chr2:132868304-132880891  | 0.2446   | 0.1868   | -0.3895 | 0.423545 |
| <i>Slx4ip</i>        | chr2:136891217-137071950  | 3.5496   | 3.3088   | -0.1013 | 0.181785 |
| <i>Gm11688</i>       | chr2:144261233-144261541  | 8.3359   | 7.1002   | -0.2315 | 0.285794 |
| <i>Oser1</i>         | chr2:163405821-163424697  | 2.8770   | 3.1110   | 0.1128  | 0.449344 |
| <i>Gmeb2</i>         | chr2:181251448-181288035  | 8.8498   | 8.2957   | -0.0933 | 0.353572 |
| <i>Tmem234</i>       | chr4:129600667-129624059  | 36.8942  | 34.8322  | -0.0830 | 0.301449 |
| <i>Slc25a4</i>       | chr8:46206796-46211284    | 73.0743  | 76.0225  | 0.0571  | 0.599217 |
| <i>0610011F06Rik</i> | chr17:25875463-25886007   | 22.5058  | 20.9153  | -0.1057 | 0.298784 |
| <i>Trpm5</i>         | chr7:143069152-143094642  | 0.2059   | 0.1629   | -0.3379 | 0.437050 |
| <i>Gm15978</i>       | chr17:87329763-87332052   | 3.3355   | 2.8603   | -0.2217 | 0.301898 |
| <i>Hps4</i>          | chr5:112343082-112378414  | 4.5631   | 4.2286   | -0.1098 | 0.286575 |

|                      |                           |          |          |         |          |
|----------------------|---------------------------|----------|----------|---------|----------|
| <i>H2-D1</i>         | chr17:35262729-35267499   | 709.1008 | 671.3103 | -0.0790 | 0.324281 |
| <i>Trim2</i>         | chr3:84160438-84305446    | 0.4763   | 0.4283   | -0.1531 | 0.429934 |
| <i>Fn3krp</i>        | chr11:121421400-121431288 | 4.5027   | 4.7943   | 0.0905  | 0.514972 |
| <i>Hif1a</i>         | chr12:73901374-73947530   | 36.3097  | 37.3374  | 0.0403  | 0.534266 |
| <i>Arcn1</i>         | chr9:44741563-44767845    | 29.1709  | 27.5600  | -0.0820 | 0.303576 |
| <i>Frat1</i>         | chr19:41830167-41830809   | 8.6752   | 9.9012   | 0.1907  | 0.579601 |
| <i>Gm6963</i>        | chr10:39424617-39424996   | 3.9131   | 4.6024   | 0.2341  | 0.463395 |
| <i>Arhgef7</i>       | chr8:11728104-11835219    | 4.5563   | 4.2576   | -0.0978 | 0.427513 |
| <i>Shpk</i>          | chr11:73199459-73224511   | 4.8833   | 4.4840   | -0.1231 | 0.347254 |
| <i>2610206C17Rik</i> | chr7:84689639-84776549    | 0.7943   | 0.6445   | -0.3015 | 0.281236 |
| <i>Supt16</i>        | chr14:52160418-52197239   | 56.9339  | 58.0094  | 0.0270  | 0.397863 |
| <i>St6galnac3</i>    | chr3:153205404-153725062  | 2.0322   | 2.3442   | 0.2061  | 0.452587 |
| <i>Kifc3</i>         | chr8:95099831-95142540    | 2.0850   | 1.8457   | -0.1759 | 0.496345 |
| <i>Nid2</i>          | chr14:19751256-19811787   | 0.2860   | 0.2335   | -0.2924 | 0.237628 |
| <i>Fam184b</i>       | chr5:45529705-45639501    | 0.3059   | 0.2444   | -0.2339 | 0.341254 |
| <i>Scarb2</i>        | chr5:92443872-92505608    | 50.9063  | 47.9500  | -0.0863 | 0.316412 |
| <i>Ccdc106</i>       | chr7:5056151-5060785      | 0.6949   | 0.5694   | -0.2873 | 0.468619 |
| <i>Zfp790</i>        | chr7:29816071-29832042    | 10.1658  | 9.5452   | -0.0909 | 0.284883 |
| <i>Dis3l</i>         | chr9:64306755-64341288    | 5.2447   | 5.4760   | 0.0623  | 0.560403 |
| <i>Kif4</i>          | chrX:100625736-100727214  | 1.8675   | 2.2626   | 0.2769  | 0.556394 |
| <i>Dap</i>           | chr15:31224384-31274338   | 17.4050  | 16.0760  | -0.1146 | 0.442340 |
| <i>Tymp</i>          | chr15:89371930-89377039   | 10.0661  | 10.6036  | 0.0750  | 0.586634 |
| <i>Dock5</i>         | chr14:67751927-67933572   | 4.7751   | 5.1045   | 0.0962  | 0.670198 |
| <i>Gm17233</i>       | chr14:73173819-73187321   | 8.1866   | 7.1436   | -0.1966 | 0.470817 |
| <i>Abcc10</i>        | chr17:46303220-46328352   | 1.9493   | 1.7803   | -0.1309 | 0.426960 |
| <i>Ttc30a1</i>       | chr2:75979105-75981967    | 1.2168   | 1.3625   | 0.1631  | 0.534393 |
| <i>Zfp106</i>        | chr2:120506819-120563843  | 17.2840  | 17.5780  | 0.0243  | 0.466581 |
| <i>Gm25360</i>       | chr1:72226239-72226430    | 22.8011  | 19.3247  | -0.2387 | 0.532197 |
| <i>Tmc4</i>          | chr7:3665789-3677524      | 2.1430   | 1.9585   | -0.1299 | 0.153440 |
| <i>Abrac1</i>        | chr10:18011262-18023252   | 136.2046 | 143.6578 | 0.0769  | 0.631980 |
| <i>Mif</i>           | chr10:75859352-75860250   | 42.2824  | 38.0741  | -0.1512 | 0.512151 |
| <i>Slc35e3</i>       | chr10:117733678-117746358 | 1.5881   | 1.4186   | -0.1629 | 0.271688 |
| <i>Cdk2</i>          | chr10:128697938-128705051 | 9.5837   | 8.9410   | -0.1001 | 0.262483 |
| <i>Myo1g</i>         | chr11:6506547-6520965     | 49.8331  | 47.4507  | -0.0707 | 0.265970 |
| <i>Chrne</i>         | chr11:70614882-70619216   | 0.5340   | 0.6524   | 0.2889  | 0.457621 |
| <i>Trim25</i>        | chr11:88999375-89020293   | 16.9638  | 17.6567  | 0.0578  | 0.657119 |
| <i>Susd3</i>         | chr13:49230689-49248706   | 4.1668   | 3.7204   | -0.1635 | 0.527707 |
| <i>Zfp273</i>        | chr13:67813739-67827002   | 2.6037   | 2.8089   | 0.1094  | 0.560819 |
| <i>Gm17590</i>       | chr5:3473070-3473178      | 24.5736  | 20.8852  | -0.2346 | 0.463167 |
| <i>Shfm1</i>         | chr6:6557293-6578658      | 57.9977  | 65.7176  | 0.1803  | 0.518789 |
| <i>Gimap8</i>        | chr6:48647233-48660875    | 214.0808 | 202.4011 | -0.0809 | 0.337897 |
| <i>Kdm5a</i>         | chr6:120364098-120444574  | 32.7167  | 31.1698  | -0.0699 | 0.238453 |
| <i>Foxm1</i>         | chr6:128362966-128375893  | 1.1372   | 1.2793   | 0.1699  | 0.646166 |
| <i>Chad2</i>         | chr7:73426690-73541746    | 61.3163  | 62.4491  | 0.0264  | 0.521149 |
| <i>Doc2a</i>         | chr7:126847415-126852705  | 5.1127   | 4.6411   | -0.1396 | 0.443101 |
| <i>Brf2</i>          | chr8:27123831-27128632    | 7.2243   | 6.6133   | -0.1275 | 0.240713 |
| <i>Prmt10</i>        | chr8:77549396-77581338    | 10.8560  | 10.1627  | -0.0952 | 0.361368 |
| <i>Lcat</i>          | chr8:105939550-105943382  | 0.7123   | 0.8765   | 0.2992  | 0.416986 |
| <i>Slc7a6</i>        | chr8:106168874-106198704  | 16.3569  | 15.4013  | -0.0869 | 0.344793 |
| <i>Zfp1</i>          | chr8:111643442-111671008  | 16.4570  | 15.2841  | -0.1067 | 0.381051 |
| <i>Hmg20a</i>        | chr9:56418643-56496884    | 19.0082  | 19.6245  | 0.0460  | 0.582638 |
| <i>Polr2m</i>        | chr9:71478436-71485935    | 61.1666  | 63.4487  | 0.0528  | 0.614822 |
| <i>Scp2-ps2</i>      | chr9:123307507-123307939  | 4.8863   | 4.0949   | -0.2549 | 0.337036 |
| <i>Suv39h1</i>       | chrX:8061170-8074760      | 8.9618   | 8.4658   | -0.0821 | 0.146363 |
| <i>Zfp707</i>        | chr15:75969122-75975868   | 8.0402   | 7.5384   | -0.0930 | 0.190228 |
| <i>Soat2</i>         | chr15:102150525-102163474 | 0.8395   | 1.0420   | 0.3118  | 0.619632 |
| <i>Slc7a7</i>        | chr14:54369443-54409472   | 1.4594   | 1.2619   | -0.2098 | 0.349731 |
| <i>Mtrf1</i>         | chr14:79397771-79423650   | 2.8782   | 3.1774   | 0.1427  | 0.525085 |
| <i>NA</i>            | chr17:6451887-6477102     | 4.0916   | 4.6090   | 0.1718  | 0.317478 |
| <i>Brpf3</i>         | chr17:28801089-28838546   | 2.6176   | 2.3901   | -0.1312 | 0.479521 |
| <i>Mrps10</i>        | chr17:47368886-47381417   | 4.6864   | 4.4253   | -0.0827 | 0.113252 |
| <i>Wdr5b</i>         | chr16:36041189-36042973   | 15.5018  | 14.4717  | -0.0992 | 0.263162 |
| <i>Tmem134</i>       | chr19:4125933-4132307     | 21.4532  | 20.2344  | -0.0844 | 0.335970 |
| <i>Gm15832</i>       | chr1:39547569-39552002    | 6.3622   | 5.8733   | -0.1153 | 0.063851 |
| <i>Mars2</i>         | chr1:55237176-55240058    | 13.9601  | 13.1385  | -0.0875 | 0.279374 |
| <i>Glb1l</i>         | chr1:75198242-75210778    | 5.2055   | 5.4200   | 0.0583  | 0.520964 |
| <i>Aldh9a1</i>       | chr1:167349990-167368530  | 16.9008  | 16.0328  | -0.0761 | 0.037176 |
| <i>Saccag8</i>       | chr1:176814659-177020437  | 10.4030  | 10.6979  | 0.0403  | 0.444600 |
| <i>Trp53inp2</i>     | chr2:155381058-155389850  | 0.5421   | 0.6185   | 0.1902  | 0.518569 |
| <i>Cnn3</i>          | chr3:121426540-121458205  | 10.8873  | 9.8433   | -0.1454 | 0.503887 |
| <i>Grhpr</i>         | chr4:44981394-44990734    | 5.2396   | 4.6488   | -0.1726 | 0.475985 |

|                      |                          |          |          |         |          |
|----------------------|--------------------------|----------|----------|---------|----------|
| <i>Caap1</i>         | chr4:94500080-94556796   | 6.1837   | 5.7483   | -0.1053 | 0.257690 |
| <i>Nadk</i>          | chr4:155562377-155591001 | 25.6099  | 24.2660  | -0.0778 | 0.219200 |
| <i>Foxn2</i>         | chr17:88440710-88490533  | 24.8943  | 23.5813  | -0.0782 | 0.280514 |
| <i>Gm20517</i>       | chr17:47611588-47683861  | 4.2389   | 3.9559   | -0.0997 | 0.313720 |
| <i>R3hcc1</i>        | chr14:69697306-69707584  | 6.9480   | 7.4129   | 0.0934  | 0.599705 |
| <i>Zfp27</i>         | chr7:29893332-29906572   | 5.2880   | 5.5691   | 0.0747  | 0.568178 |
| <i>9130019O22Rik</i> | chr7:127382259-127387166 | 5.3731   | 4.9378   | -0.1219 | 0.427519 |
| <i>Aar2</i>          | chr2:156547583-156568972 | 10.9954  | 10.3530  | -0.0869 | 0.208154 |
| <i>Emid1</i>         | chr11:5106264-5152257    | 1.5970   | 1.4108   | -0.1789 | 0.291666 |
| <i>A430072P03Rik</i> | chr5:107725156-107728801 | 1.9598   | 1.7147   | -0.1927 | 0.204600 |
| <i>Sfxn5</i>         | chr6:85213050-85333422   | 0.2833   | 0.3311   | 0.2249  | 0.464393 |
| <i>Gm16433</i>       | chr6:108563444-108565693 | 1.2237   | 1.3903   | 0.1841  | 0.514959 |
| <i>Gm5898</i>        | chr7:63542478-63544549   | 2.1646   | 2.4171   | 0.1592  | 0.532802 |
| <i>Trim68</i>        | chr7:102677579-102687326 | 6.5638   | 6.8919   | 0.0704  | 0.442946 |
| <i>Zswim4</i>        | chr8:84210941-84237042   | 7.3386   | 6.8114   | -0.1076 | 0.432525 |
| <i>Dhodh</i>         | chr8:109591342-109608673 | 4.5142   | 4.2076   | -0.1015 | 0.325334 |
| <i>Nktr</i>          | chr9:121719168-121756843 | 23.6693  | 24.2391  | 0.0343  | 0.629742 |
| <i>1810030O07Rik</i> | chrX:12654878-12673668   | 27.8776  | 26.3327  | -0.0823 | 0.294006 |
| <i>Itm2b</i>         | chr14:73362230-73385271  | 261.5453 | 267.4049 | 0.0320  | 0.516939 |
| <i>H2-M3</i>         | chr17:37270219-37274484  | 50.9003  | 47.8590  | -0.0889 | 0.322654 |
| <i>Ppp2r5b</i>       | chr19:6227764-6235872    | 5.5688   | 5.1209   | -0.1210 | 0.395048 |
| <i>Teddm1a</i>       | chr1:153891645-153893060 | 0.5756   | 0.4387   | -0.3921 | 0.382323 |
| <i>Efcab2</i>        | chr1:178405880-178483247 | 2.2302   | 1.9824   | -0.1699 | 0.415988 |
| <i>Matr3</i>         | chr18:35562157-35592045  | 104.5409 | 108.7330 | 0.0567  | 0.618284 |
| <i>Ttf1</i>          | chr2:29060261-29087656   | 15.8440  | 15.0020  | -0.0788 | 0.272500 |
| <i>Hsd17b12</i>      | chr2:94032688-94157964   | 21.0052  | 19.6393  | -0.0970 | 0.342091 |
| <i>Mfap1b</i>        | chr2:121460234-121474067 | 5.7242   | 5.2323   | -0.1296 | 0.439632 |
| <i>Tiparp</i>        | chr3:65528409-6555145    | 10.6094  | 9.9325   | -0.0951 | 0.331637 |
| <i>Ciart</i>         | chr3:95878502-95882251   | 1.6792   | 1.4653   | -0.1966 | 0.363563 |
| <i>Hist2h2ac</i>     | chr3:96220360-96220880   | 68.4926  | 72.6521  | 0.0851  | 0.658839 |
| <i>Fsd1l</i>         | chr4:53631470-53707009   | 0.1104   | 0.1433   | 0.3757  | 0.573527 |
| <i>B430219N15Rik</i> | chr10:7780184-7781357    | 2.1630   | 2.4609   | 0.1862  | 0.486107 |
| <i>Dgke</i>          | chr11:89035178-89066850  | 8.4801   | 8.7291   | 0.0417  | 0.580958 |
| <i>Med6</i>          | chr12:81573556-81595008  | 15.9293  | 16.6642  | 0.0651  | 0.547948 |
| <i>Ptger1</i>        | chr8:83666832-83672753   | 28.7461  | 27.0765  | -0.0863 | 0.408226 |
| <i>Agl</i>           | chr3:116739998-116808166 | 2.5437   | 2.3795   | -0.0962 | 0.337885 |
| <i>Nfj</i>           | chr11:79339692-79581612  | 1.3561   | 1.4340   | 0.0806  | 0.637619 |
| <i>Trbj2-4</i>       | chr6:41543361-41543410   | 193.7769 | 177.7423 | -0.1246 | 0.197138 |
| <i>Ipo8</i>          | chr6:148770682-148831467 | 12.3218  | 11.7592  | -0.0674 | 0.110801 |
| <i>Cox6b1</i>        | chr7:30616973-30626151   | 203.3793 | 217.3580 | 0.0959  | 0.643896 |
| <i>Traj20</i>        | chr14:54199440-54199498  | 36.5279  | 30.6059  | -0.2552 | 0.364052 |
| <i>Parp14</i>        | chr16:35832873-35871544  | 44.0957  | 45.9887  | 0.0606  | 0.672146 |
| <i>Gm27042</i>       | chr19:40589434-40594862  | 2.6666   | 2.9730   | 0.1569  | 0.392798 |
| <i>Cbfa2t2</i>       | chr2:154436480-154539356 | 3.1348   | 2.9394   | -0.0928 | 0.216794 |
| <i>Intu</i>          | chr3:40531285-40704774   | 0.3346   | 0.2859   | -0.2271 | 0.272665 |
| <i>Dvl1</i>          | chr4:155847401-155859303 | 18.6559  | 17.6810  | -0.0774 | 0.276012 |
| <i>Gm12577</i>       | chr4:58483251-58483825   | 2.0296   | 1.5412   | -0.3972 | 0.467687 |
| <i>Dyrk1b</i>        | chr7:28179468-28187294   | 2.9891   | 3.3143   | 0.1490  | 0.622504 |
| <i>Camk2d</i>        | chr3:126596301-126844913 | 6.1883   | 6.4779   | 0.0660  | 0.671032 |
| <i>Lrrc47</i>        | chr4:154011730-154021513 | 11.5823  | 10.7880  | -0.1025 | 0.413055 |
| <i>Tnpo1</i>         | chr13:98839018-98926384  | 35.5084  | 33.4891  | -0.0845 | 0.384887 |
| <i>Uvssa</i>         | chr5:33378550-33419754   | 9.3996   | 9.7586   | 0.0541  | 0.655018 |
| <i>Ap1s1</i>         | chr5:137034992-137046135 | 7.1344   | 7.5184   | 0.0756  | 0.538958 |
| <i>Inpp5f</i>        | chr7:128611327-128696425 | 6.3913   | 6.5761   | 0.0411  | 0.556380 |
| <i>Eif1b</i>         | chr9:120492605-120495327 | 48.6699  | 45.4425  | -0.0990 | 0.360102 |
| <i>Zcchc14</i>       | chr8:121598702-121652901 | 0.1865   | 0.2217   | 0.2489  | 0.520650 |
| <i>Sprtn</i>         | chr8:124897885-124903813 | 18.7234  | 17.6769  | -0.0830 | 0.183433 |
| <i>Elf1</i>          | chr14:79481193-79582476  | 110.3065 | 112.6879 | 0.0308  | 0.559048 |
| <i>Alkbh2</i>        | chr5:114123925-114128218 | 5.0475   | 5.5440   | 0.1354  | 0.551068 |
| <i>Srf</i>           | chr17:46546838-46556162  | 25.1763  | 26.1012  | 0.0520  | 0.624266 |
| <i>Gm17606</i>       | chr14:54640951-54648293  | 49.2062  | 45.0668  | -0.1268 | 0.342366 |
| <i>Dnm1</i>          | chr2:32308470-32353329   | 0.1524   | 0.1906   | 0.3233  | 0.483528 |
| <i>Pkn2</i>          | chr3:142790901-142882004 | 27.3295  | 28.0962  | 0.0399  | 0.563990 |
| <i>Gm4925</i>        | chr10:88729540-88731101  | 1.0378   | 0.8313   | -0.3200 | 0.427298 |
| <i>Rdh10</i>         | chr1:16105773-16133734   | 3.2652   | 2.9846   | -0.1296 | 0.405766 |
| <i>Ncln</i>          | chr10:81486248-81496392  | 36.2914  | 33.9901  | -0.0945 | 0.430596 |
| <i>Irf2bpl</i>       | chr12:86880702-86884814  | 18.1782  | 16.9038  | -0.1049 | 0.482816 |
| <i>Cdc7</i>          | chr5:106964321-106984432 | 10.4941  | 9.8527   | -0.0910 | 0.293008 |
| <i>Tnip3</i>         | chr6:65590397-65634040   | 0.2308   | 0.2960   | 0.3585  | 0.487991 |
| <i>Dctd</i>          | chr8:48099091-48153233   | 3.5733   | 3.2585   | -0.1331 | 0.426934 |
| <i>Tmem39a</i>       | chr16:38558697-38592162  | 5.6823   | 5.8995   | 0.0541  | 0.403595 |



|                      |                           |          |          |         |          |
|----------------------|---------------------------|----------|----------|---------|----------|
| <i>Nvl</i>           | chr1:181093422-181144157  | 27.6427  | 26.1323  | -0.0811 | 0.323956 |
| <i>Gm13807</i>       | chr2:93403546-93417830    | 4.9122   | 5.3406   | 0.1206  | 0.566471 |
| <i>Chd1l</i>         | chr3:97560741-97610203    | 25.1620  | 25.7764  | 0.0348  | 0.424573 |
| <i>Lmo4</i>          | chr3:144188529-144205220  | 7.9146   | 8.3296   | 0.0737  | 0.583020 |
| <i>Lyrm5</i>         | chr6:145211133-145216939  | 10.0726  | 10.5106  | 0.0614  | 0.517411 |
| <i>BC037032</i>      | chr15:4021685-4027402     | 1.2734   | 1.3781   | 0.1140  | 0.467639 |
| <i>Arhgef33</i>      | chr17:80307406-80388688   | 0.2192   | 0.2745   | 0.3242  | 0.298627 |
| <i>Mybl1</i>         | chr1:9667414-9700209      | 0.5632   | 0.6412   | 0.1871  | 0.561789 |
| <i>Dock10</i>        | chr1:80501072-80758553    | 184.0832 | 174.6688 | -0.0757 | 0.302933 |
| <i>Psd2</i>          | chr18:35964829-36014715   | 0.2333   | 0.1883   | -0.3090 | 0.188177 |
| <i>Hsf2</i>          | chr10:57486384-57513133   | 6.1208   | 5.6610   | -0.1127 | 0.328736 |
| <i>R3hdm2</i>        | chr10:127380326-127499384 | 4.0250   | 4.2562   | 0.0806  | 0.642381 |
| <i>Peli1</i>         | chr11:21091290-21150323   | 63.9189  | 64.9473  | 0.0230  | 0.590010 |
| <i>Med13</i>         | chr11:86267032-86357602   | 24.2660  | 25.0901  | 0.0482  | 0.640322 |
| <i>Thra</i>          | chr11:98740637-98769006   | 3.1009   | 3.3414   | 0.1078  | 0.619931 |
| <i>Klhl11</i>        | chr11:100462613-100472741 | 15.5324  | 14.5256  | -0.0967 | 0.327672 |
| <i>Dnal1</i>         | chr12:84114365-84147498   | 0.1834   | 0.2220   | 0.2758  | 0.523070 |
| <i>Arel1</i>         | chr12:84918147-84970900   | 24.4586  | 23.1008  | -0.0824 | 0.402448 |
| <i>Pomt2</i>         | chr12:87106865-87147902   | 3.6927   | 3.8884   | 0.0745  | 0.571621 |
| <i>Klhl3</i>         | chr13:58004220-58113592   | 1.9163   | 2.0726   | 0.1131  | 0.463832 |
| <i>Ksr2</i>          | chr5:117413999-11775003   | 0.1569   | 0.1921   | 0.2925  | 0.577828 |
| <i>Rnf216</i>        | chr5:142990892-143113020  | 1.7304   | 1.8576   | 0.1023  | 0.531001 |
| <i>Ccdc91</i>        | chr6:147475870-147632612  | 11.0580  | 11.4735  | 0.0532  | 0.489780 |
| <i>Tm2d3</i>         | chr7:65691168-65701913    | 16.9433  | 15.6945  | -0.1105 | 0.374062 |
| <i>Snora3</i>        | chr7:109520119-109520251  | 39.0310  | 34.0397  | -0.1974 | 0.466562 |
| <i>Tollip</i>        | chr7:141874812-141918507  | 13.4688  | 12.7490  | -0.0792 | 0.197127 |
| <i>Rfxank</i>        | chr8:70130811-70139197    | 11.5898  | 10.8664  | -0.0930 | 0.300427 |
| <i>Gm22305</i>       | chr8:86671235-86671343    | 9.3836   | 11.9977  | 0.3545  | 0.610675 |
| <i>Galns</i>         | chr8:122578237-122611487  | 11.9944  | 11.1107  | -0.1104 | 0.435347 |
| <i>Sc5d</i>          | chr9:42254176-42264300    | 20.5635  | 19.1032  | -0.1063 | 0.435313 |
| <i>Lctf</i>          | chr9:64117146-64138118    | 0.3383   | 0.4226   | 0.3208  | 0.461685 |
| <i>NA</i>            | chr9:104084156-104102560  | 1.4317   | 1.5891   | 0.1505  | 0.559150 |
| <i>Gm24044</i>       | chr9:120128779-120128935  | 59.4566  | 63.1450  | 0.0868  | 0.477085 |
| <i>4933407K13Rik</i> | chrX:75706931-75764699    | 1.0659   | 1.1474   | 0.1063  | 0.500031 |
| <i>Sox10</i>         | chr15:79154912-79164490   | 0.3019   | 0.3737   | 0.3078  | 0.394667 |
| <i>Ep300</i>         | chr15:81586213-81652077   | 11.5116  | 12.2011  | 0.0839  | 0.698907 |
| <i>Nisch</i>         | chr14:31170929-31216946   | 19.6722  | 18.6494  | -0.0770 | 0.369365 |
| <i>Sod2</i>          | chr17:13007838-13018119   | 14.1976  | 13.4081  | -0.0825 | 0.231877 |
| <i>Angptl4</i>       | chr17:33773749-33781575   | 2.3034   | 2.4948   | 0.1151  | 0.568037 |
| <i>Kank3</i>         | chr17:33810519-33822918   | 2.5971   | 2.7595   | 0.0875  | 0.279767 |
| <i>Lclat1</i>        | chr17:73107984-73243368   | 5.7265   | 6.0440   | 0.0778  | 0.657145 |
| <i>Lrch3</i>         | chr16:32914099-33015647   | 28.6044  | 29.1265  | 0.0261  | 0.412788 |
| <i>Gm17106</i>       | chr16:32985853-33108601   | 14.9009  | 15.9112  | 0.0946  | 0.208609 |
| <i>Gm16310</i>       | chr16:92094567-92096490   | 2.0154   | 2.2966   | 0.1884  | 0.402344 |
| <i>NA</i>            | chr19:8772521-8774467     | 55.0384  | 51.6442  | -0.0918 | 0.319097 |
| <i>Ric1</i>          | chr19:29522281-29606829   | 10.2191  | 10.5266  | 0.0428  | 0.592256 |
| <i>Lipo1</i>         | chr19:33517739-33761951   | 0.6641   | 0.7554   | 0.1858  | 0.467345 |
| <i>Rab23</i>         | chr1:33719881-33742564    | 0.9422   | 1.0188   | 0.1127  | 0.507300 |
| <i>Raph1</i>         | chr1:60483190-60567104    | 0.5778   | 0.6920   | 0.2602  | 0.638385 |
| <i>Igsf8</i>         | chr1:172261640-172319841  | 1.7104   | 1.8478   | 0.1114  | 0.581660 |
| <i>Srp9</i>          | chr1:182124736-182132407  | 25.7750  | 27.4267  | 0.0896  | 0.599553 |
| <i>1700066B19Rik</i> | chr18:35703224-35730869   | 1.2130   | 1.3460   | 0.1501  | 0.452387 |
| <i>Gm27026</i>       | chr18:52472847-52473739   | 1.6283   | 1.8915   | 0.2162  | 0.396427 |
| <i>Tubb6</i>         | chr18:67390716-67402748   | 2.1685   | 1.8906   | -0.1979 | 0.418273 |
| <i>Pigt</i>          | chr2:164497519-164508301  | 9.1490   | 8.4775   | -0.1100 | 0.468889 |
| <i>Mrps21</i>        | chr3:95862633-95871519    | 15.8526  | 16.9584  | 0.0973  | 0.602994 |
| <i>Hist2h3c1</i>     | chr3:96246684-96248509    | 0.6632   | 0.5418   | -0.2918 | 0.156777 |
| <i>Fam73a</i>        | chr3:152273458-152340407  | 4.6968   | 4.9300   | 0.0699  | 0.616034 |
| <i>Tmem67</i>        | chr4:12039354-12090020    | 0.4561   | 0.3898   | -0.2264 | 0.513547 |
| <i>Fbxl4</i>         | chr4:22357542-22434091    | 8.4307   | 8.8884   | 0.0763  | 0.637610 |
| <i>Aqp3</i>          | chr4:41092721-41098183    | 7.9269   | 7.2094   | -0.1369 | 0.471150 |
| <i>Slc44a1</i>       | chr4:53440412-53622478    | 4.2807   | 4.0021   | -0.0971 | 0.355955 |
| <i>Suz12</i>         | chr11:79993105-80034123   | 31.6025  | 29.9047  | -0.0797 | 0.328517 |
| <i>Tpp1</i>          | chr7:105744846-105752207  | 6.8828   | 7.1914   | 0.0633  | 0.599075 |
| <i>Plip</i>          | chr8:94674894-94696242    | 0.6417   | 0.5250   | -0.2896 | 0.184531 |
| <i>Gm16156</i>       | chr8:105934332-105945843  | 3.9749   | 4.4808   | 0.1728  | 0.559619 |
| <i>Mbtps1</i>        | chr8:119508155-119558761  | 42.7825  | 40.7889  | -0.0688 | 0.255763 |
| <i>Plxna3</i>        | chrX:74329065-74344689    | 0.4461   | 0.3890   | -0.1977 | 0.350347 |
| <i>Gm26621</i>       | chr15:68334714-68337430   | 1.1836   | 0.9828   | -0.2681 | 0.566749 |
| <i>Fam117b</i>       | chr1:59913005-59985346    | 16.2472  | 15.3290  | -0.0839 | 0.386652 |
| <i>Gm16026</i>       | chr1:85266697-85285491    | 0.2828   | 0.3415   | 0.2720  | 0.540597 |

|                      |                           |          |          |         |          |
|----------------------|---------------------------|----------|----------|---------|----------|
| <i>lws1</i>          | chr18:32067733-32104331   | 23.5840  | 24.1423  | 0.0338  | 0.572396 |
| <i>Pex11b</i>        | chr3:96635375-96653101    | 4.3771   | 4.5542   | 0.0572  | 0.501155 |
| <i>Ak5</i>           | chr3:152462814-152668140  | 0.6361   | 0.5392   | -0.2384 | 0.235323 |
| <i>Pnpt1</i>         | chr11:29130743-29161828   | 32.9624  | 34.2488  | 0.0552  | 0.641190 |
| <i>Mgat4b</i>        | chr11:50210889-50235103   | 2.4868   | 2.2353   | -0.1538 | 0.399789 |
| <i>2610507101Rik</i> | chr11:59199835-59202385   | 7.9108   | 7.2692   | -0.1220 | 0.281492 |
| <i>Rpl26</i>         | chr11:68901582-68906989   | 133.2189 | 116.7101 | -0.1909 | 0.449617 |
| <i>Med11</i>         | chr11:70451918-70453727   | 34.5351  | 36.1838  | 0.0673  | 0.606533 |
| <i>Rph3al</i>        | chr11:75830998-75938429   | 1.1244   | 1.2325   | 0.1324  | 0.437283 |
| <i>Ccdc55</i>        | chr11:77044291-77078435   | 10.1349  | 10.7904  | 0.0904  | 0.650027 |
| <i>Zfp385c</i>       | chr11:100627542-100692455 | 0.9871   | 0.8379   | -0.2364 | 0.469626 |
| <i>Milr1</i>         | chr11:106751225-106768794 | 5.0042   | 4.5947   | -0.1232 | 0.322903 |
| <i>Tmx1</i>          | chr12:70453094-70468040   | 24.3369  | 22.7966  | -0.0943 | 0.388871 |
| <i>Slirp</i>         | chr12:87443895-87452206   | 37.3320  | 38.2997  | 0.0369  | 0.550740 |
| <i>Gm16086</i>       | chr12:107079359-107099673 | 3.5239   | 4.1492   | 0.2357  | 0.409399 |
| <i>Hist1h4i</i>      | chr13:22040815-22041352   | 7.0886   | 6.1426   | -0.2067 | 0.452696 |
| <i>2010111101Rik</i> | chr13:63014933-63326096   | 12.6642  | 11.8301  | -0.0983 | 0.462074 |
| <i>Slc6a19os</i>     | chr13:73699825-73709850   | 1.2541   | 1.0252   | -0.2907 | 0.473597 |
| <i>1700109H08Rik</i> | chr5:3571565-3584356      | 11.9630  | 12.8649  | 0.1049  | 0.569180 |
| <i>Poln</i>          | chr5:34007197-34169448    | 0.7026   | 0.8041   | 0.1947  | 0.449977 |
| <i>Gm20033</i>       | chr5:64708206-64804117    | 4.7146   | 5.0649   | 0.1034  | 0.587459 |
| <i>Rfc3</i>          | chr5:151642755-151651242  | 3.9565   | 4.1433   | 0.0665  | 0.424716 |
| <i>Lrrc4</i>         | chr6:28661830-28831747    | 0.8617   | 0.9578   | 0.1525  | 0.503813 |
| <i>3110062M04Rik</i> | chr6:34871770-34878060    | 5.4773   | 5.7406   | 0.0677  | 0.594635 |
| <i>Vamp5</i>         | chr6:72368048-72380468    | 3.1097   | 3.3898   | 0.1244  | 0.455044 |
| <i>Mical3</i>        | chr6:120931706-121003153  | 0.3230   | 0.2773   | -0.2200 | 0.396567 |
| <i>Chd4</i>          | chr6:125095980-125130591  | 87.7633  | 84.0096  | -0.0631 | 0.171785 |
| <i>9630033F20Rik</i> | chr6:127085115-127109550  | 5.6684   | 5.2735   | -0.1042 | 0.324965 |
| <i>Zfp606</i>        | chr7:12478292-12496235    | 6.1816   | 5.7939   | -0.0935 | 0.383188 |
| <i>Gm15567</i>       | chr7:27249262-27257932    | 1.8610   | 2.0328   | 0.1274  | 0.406951 |
| <i>Fam83e</i>        | chr7:45721211-45729492    | 0.6326   | 0.5410   | -0.2255 | 0.390972 |
| <i>Blm</i>           | chr7:80454992-80535119    | 6.3353   | 5.9027   | -0.1020 | 0.415561 |
| <i>Tnfrsf23</i>      | chr7:143665808-143685872  | 0.3444   | 0.2784   | -0.3071 | 0.342647 |
| <i>Whsc1l1</i>       | chr8:25601600-25719667    | 22.2348  | 22.9874  | 0.0480  | 0.670378 |
| <i>D130040H23Rik</i> | chr8:69300775-69303162    | 9.0280   | 9.5622   | 0.0829  | 0.490185 |
| <i>Hsd1l</i>         | chr8:119561978-119575200  | 38.5910  | 36.3056  | -0.0881 | 0.389682 |
| <i>Stt3a</i>         | chr9:36731274-36767679    | 19.3420  | 19.7778  | 0.0321  | 0.551489 |
| <i>Ccdc15</i>        | chr9:37275834-37348392    | 4.5420   | 4.8178   | 0.0850  | 0.620397 |
| <i>Enox2</i>         | chrX:49009706-49288259    | 5.5919   | 5.8547   | 0.0663  | 0.545391 |
| <i>Tfcp2</i>         | chr15:100502798-100552008 | 4.6968   | 4.9440   | 0.0740  | 0.571702 |
| <i>Gm22877</i>       | chr14:103650452-103650557 | 25.5453  | 21.1545  | -0.2721 | 0.539169 |
| <i>Gm16702</i>       | chr17:8379044-8389468     | 0.3988   | 0.4859   | 0.2850  | 0.537044 |
| <i>D930048G16Rik</i> | chr17:23790703-23794241   | 1.9068   | 1.6837   | -0.1795 | 0.296465 |
| <i>Clpp</i>          | chr17:56990263-56996371   | 21.0161  | 21.9426  | 0.0622  | 0.542089 |
| <i>Osbp11</i>        | chr16:33185070-33243311   | 17.2443  | 16.3426  | -0.0775 | 0.263288 |
| <i>Atp6v1a</i>       | chr16:44085401-44139705   | 10.1657  | 9.6081   | -0.0814 | 0.229438 |
| <i>Klf21b</i>        | chr1:136131388-136177998  | 61.5388  | 57.4513  | -0.0992 | 0.509208 |
| <i>Prg4</i>          | chr1:150449411-150466165  | 4.6225   | 4.3185   | -0.0982 | 0.163441 |
| <i>Psmb7</i>         | chr2:38588035-38644087    | 52.2567  | 54.6916  | 0.0657  | 0.628756 |
| <i>Tanc1</i>         | chr2:59612041-59846149    | 10.6227  | 10.1216  | -0.0697 | 0.256954 |
| <i>Ragef4os3</i>     | chr2:72244964-72248975    | 1.9522   | 2.1628   | 0.1478  | 0.661503 |
| <i>Ola1</i>          | chr2:73092800-73218924    | 20.7586  | 21.6303  | 0.0593  | 0.616274 |
| <i>4631405J19Rik</i> | chr2:93027955-93044732    | 0.7241   | 0.8177   | 0.1753  | 0.468585 |
| <i>Gm13910</i>       | chr2:108948779-108950727  | 1.8497   | 2.0610   | 0.1561  | 0.468652 |
| <i>Plcb2</i>         | chr2:118707516-118728438  | 28.8274  | 29.4424  | 0.0305  | 0.635937 |
| <i>Snrpb2</i>        | chr2:143063038-143072853  | 20.6496  | 21.6174  | 0.0661  | 0.625333 |
| <i>Slpi</i>          | chr2:164354069-164389095  | 1.2283   | 1.4225   | 0.2117  | 0.398893 |
| <i>Gm14320</i>       | chr2:167662108-167667697  | 1.6921   | 1.4147   | -0.2583 | 0.276671 |
| <i>Rbm38</i>         | chr2:173020497-173034734  | 34.3109  | 31.7826  | -0.1104 | 0.527386 |
| <i>Pip5k1a</i>       | chr3:95058529-95106930    | 16.2346  | 16.6809  | 0.0391  | 0.507915 |
| <i>Tgs1</i>          | chr4:3574874-3616619      | 7.2939   | 7.6149   | 0.0621  | 0.599238 |
| <i>Ndufaf4</i>       | chr4:24898082-24905001    | 11.1832  | 10.4035  | -0.1043 | 0.440623 |
| <i>Hyi</i>           | chr4:118359989-118362744  | 8.0021   | 8.3375   | 0.0592  | 0.394680 |
| <i>4930535I16Rik</i> | chr4:123917503-123918022  | 3.8672   | 4.5027   | 0.2195  | 0.527537 |
| <i>Znhit6</i>        | chr3:145576207-145605245  | 3.8567   | 3.4857   | -0.1459 | 0.457426 |
| <i>Shq1</i>          | chr6:100573080-100671157  | 5.0592   | 5.3346   | 0.0764  | 0.422024 |
| <i>Mpv17l</i>        | chr16:13903160-13949619   | 0.2553   | 0.1930   | -0.4034 | 0.452198 |
| <i>Gm17388</i>       | chr4:136355773-136359440  | 3.9571   | 3.5431   | -0.1594 | 0.555370 |
| <i>Map3k5</i>        | chr10:19934471-20142753   | 12.8994  | 13.3720  | 0.0519  | 0.658063 |
| <i>Ikzf1</i>         | chr11:11685002-11772926   | 104.2825 | 99.5576  | -0.0669 | 0.267822 |
| <i>Gm5431</i>        | chr11:48887421-48902152   | 0.4730   | 0.5524   | 0.2239  | 0.542293 |

|                      |                           |          |          |         |          |
|----------------------|---------------------------|----------|----------|---------|----------|
| <i>Hist3h2bb-ps</i>  | chr11:58954047-58954512   | 7.3736   | 8.2972   | 0.1702  | 0.541701 |
| <i>Usp22</i>         | chr11:61151784-61175055   | 19.0345  | 18.1068  | -0.0721 | 0.241290 |
| <i>Gm22068</i>       | chr11:87426715-87426879   | 19.0981  | 16.3770  | -0.2218 | 0.479758 |
| <i>Nfe2l1</i>        | chr11:96817413-96829968   | 16.2671  | 15.3104  | -0.0874 | 0.399894 |
| <i>Cdk12</i>         | chr11:98203058-98278504   | 21.9870  | 22.5228  | 0.0347  | 0.630666 |
| <i>Fmn1</i>          | chr11:103171106-103198901 | 35.0253  | 32.6261  | -0.1024 | 0.514563 |
| <i>Pcbd2</i>         | chr13:55727367-55776830   | 12.6241  | 13.5464  | 0.1017  | 0.441973 |
| <i>Fam126a</i>       | chr5:23915275-24030690    | 6.6856   | 6.2912   | -0.0877 | 0.372660 |
| <i>Atg9b</i>         | chr5:24384180-24392143    | 0.3592   | 0.2925   | -0.2966 | 0.400717 |
| <i>Lrrc8d</i>        | chr5:105699968-105832436  | 1.5067   | 1.6087   | 0.0945  | 0.635627 |
| <i>Ccdc64</i>        | chr5:115648174-115731621  | 20.8103  | 21.4645  | 0.0447  | 0.632065 |
| <i>Trafd1</i>        | chr5:121371724-121385632  | 14.0270  | 14.5519  | 0.0530  | 0.663741 |
| <i>Mepce</i>         | chr5:137781905-137786715  | 30.6704  | 28.8963  | -0.0860 | 0.408843 |
| <i>Mbd4</i>          | chr6:115840696-115853371  | 5.7959   | 5.4372   | -0.0922 | 0.280739 |
| <i>Fam21</i>         | chr6:116208032-116262668  | 44.4452  | 42.1363  | -0.0770 | 0.303545 |
| <i>Zscan18</i>       | chr7:12768091-12775658    | 1.8482   | 1.9941   | 0.1096  | 0.484727 |
| <i>Rps16</i>         | chr7:28350651-28352696    | 4.0328   | 3.4930   | -0.2073 | 0.381444 |
| <i>Tbcb</i>          | chr7:30224130-30232272    | 14.8830  | 15.6567  | 0.0731  | 0.589400 |
| <i>Gm12764</i>       | chr7:34388664-34394779    | 27.1336  | 28.6213  | 0.0770  | 0.558716 |
| <i>Prss8</i>         | chr7:127925724-127930113  | 1.3029   | 1.1126   | -0.2277 | 0.354718 |
| <i>Tma16</i>         | chr8:66474329-66486530    | 4.2090   | 4.4169   | 0.0696  | 0.536804 |
| <i>Lphn1</i>         | chr8:83900104-83941954    | 7.0822   | 6.6217   | -0.0970 | 0.453850 |
| <i>Man2b1</i>        | chr8:85083268-85098739    | 42.3729  | 40.2435  | -0.0744 | 0.336649 |
| <i>Atp5l</i>         | chr9:44913249-44920742    | 2.6050   | 2.1607   | -0.2698 | 0.248157 |
| <i>Gm20425</i>       | chr9:103190207-103230307  | 6.9743   | 7.2421   | 0.0544  | 0.458779 |
| <i>Fam213a</i>       | chr14:40993739-41013788   | 2.0290   | 1.8002   | -0.1726 | 0.503445 |
| <i>Sap18</i>         | chr14:57798179-57804980   | 9.0523   | 8.4478   | -0.0997 | 0.389004 |
| <i>Gm16301</i>       | chr14:59414071-59414636   | 2.1581   | 1.7239   | -0.3241 | 0.400499 |
| <i>Dpysl2</i>        | chr14:66802863-66868688   | 21.3948  | 20.2625  | -0.0784 | 0.339469 |
| <i>Srrm2</i>         | chr17:23803186-23824739   | 66.1542  | 70.6050  | 0.0939  | 0.707322 |
| <i>Gm23442</i>       | chr17:35162562-35162696   | 10.9412  | 9.1289   | -0.2613 | 0.147229 |
| <i>Cul9</i>          | chr17:46500571-46546388   | 1.5350   | 1.6574   | 0.1107  | 0.649001 |
| <i>Gm26637</i>       | chr17:78882041-78892500   | 3.2214   | 3.4705   | 0.1074  | 0.588975 |
| <i>Dtl</i>           | chr1:191537364-191575534  | 1.5369   | 1.6772   | 0.1260  | 0.609579 |
| <i>Slc39a6</i>       | chr18:24579880-24603817   | 11.9415  | 11.1740  | -0.0958 | 0.435558 |
| <i>Atg12</i>         | chr18:46732416-46741579   | 24.1459  | 24.9395  | 0.0467  | 0.598168 |
| <i>Gm28042</i>       | chr2:120027482-120043033  | 3.5080   | 3.2778   | -0.0979 | 0.356210 |
| <i>Spag4</i>         | chr2:156065174-156070617  | 0.2293   | 0.1825   | -0.3291 | 0.391574 |
| <i>Gon4l</i>         | chr3:88835230-88910103    | 12.7117  | 12.9657  | 0.0285  | 0.512673 |
| <i>Impad1</i>        | chr4:4762483-4793355      | 15.7265  | 14.9199  | -0.0760 | 0.272036 |
| <i>Spata21</i>       | chr4:141088332-141112760  | 0.2478   | 0.3141   | 0.3419  | 0.462144 |
| <i>Morn1</i>         | chr4:155086576-155145505  | 0.3775   | 0.4312   | 0.1922  | 0.358233 |
| <i>Pdap1</i>         | chr5:145128768-145140238  | 21.6576  | 22.7511  | 0.0711  | 0.642729 |
| <i>Gm16575</i>       | chr15:79739573-79741798   | 28.2089  | 29.3420  | 0.0568  | 0.623553 |
| <i>Actr1a</i>        | chr19:46376813-46395735   | 52.0130  | 49.5302  | -0.0706 | 0.224385 |
| <i>Nmnat2</i>        | chr1:152955100-153119260  | 3.3711   | 3.6378   | 0.1099  | 0.653839 |
| <i>Rgs14</i>         | chr13:55369731-55384687   | 44.6034  | 42.3359  | -0.0753 | 0.286836 |
| <i>Arlgip5</i>       | chr6:97210688-97233315    | 136.6651 | 129.3709 | -0.0791 | 0.296992 |
| <i>Sepw1</i>         | chr7:15917207-15922402    | 78.5426  | 84.4033  | 0.1038  | 0.662873 |
| <i>Pgap2</i>         | chr7:102210207-102238567  | 6.7251   | 6.2958   | -0.0952 | 0.356588 |
| <i>Ankrd37</i>       | chr8:45996901-45999867    | 4.9742   | 4.4071   | -0.1746 | 0.524399 |
| <i>Phkb</i>          | chr8:85840958-86061376    | 5.9586   | 6.1738   | 0.0512  | 0.614237 |
| <i>Dnmt1</i>         | chr9:20907205-20959888    | 48.9257  | 49.8509  | 0.0270  | 0.627916 |
| <i>Parp2</i>         | chr14:50807945-50821300   | 38.8361  | 36.6044  | -0.0854 | 0.337862 |
| <i>Prr22</i>         | chr17:56770275-56772134   | 0.6192   | 0.7490   | 0.2746  | 0.372881 |
| <i>Vamp4</i>         | chr1:162570514-162599084  | 10.9023  | 11.3374  | 0.0565  | 0.581672 |
| <i>Mtfr1l</i>        | chr4:134525549-134535387  | 15.8401  | 15.0548  | -0.0734 | 0.193386 |
| <i>Rnf126</i>        | chr10:79758514-79766952   | 15.6185  | 14.2968  | -0.1276 | 0.543650 |
| <i>Shmt2</i>         | chr10:127517122-127522444 | 45.9216  | 47.5792  | 0.0512  | 0.646752 |
| <i>Rhbdd3</i>        | chr11:5098925-5106093     | 2.6457   | 2.4066   | -0.1367 | 0.260367 |
| <i>Wdpcp</i>         | chr11:21572234-21898989   | 0.1710   | 0.2080   | 0.2826  | 0.527814 |
| <i>Asb3</i>          | chr11:30954394-31102704   | 7.6949   | 7.2013   | -0.0957 | 0.352245 |
| <i>Snx11</i>         | chr11:96767554-96777559   | 9.7035   | 9.0299   | -0.1038 | 0.478093 |
| <i>Zfyve21</i>       | chr12:111814169-111828388 | 3.6453   | 3.2606   | -0.1609 | 0.262817 |
| <i>Serpinh9</i>      | chr13:33003249-33017957   | 13.8858  | 14.5323  | 0.0657  | 0.647429 |
| <i>4930451E10Rik</i> | chr13:55775135-55784505   | 1.2629   | 1.5547   | 0.2999  | 0.613921 |
| <i>Tmem9b</i>        | chr7:109735833-109752875  | 51.4948  | 48.7731  | -0.0783 | 0.284781 |
| <i>Fam175b</i>       | chr7:132859224-132885114  | 11.0499  | 11.3691  | 0.0411  | 0.541262 |
| <i>Psmd7</i>         | chr8:107580380-107588482  | 24.6988  | 23.0987  | -0.0966 | 0.390890 |
| <i>Arsa</i>          | chr15:89472475-89477425   | 5.0185   | 4.6995   | -0.0947 | 0.128704 |
| <i>Thoc6</i>         | chr17:23668613-23673882   | 8.7706   | 8.0728   | -0.1196 | 0.414009 |

|                      |                           |          |          |         |          |
|----------------------|---------------------------|----------|----------|---------|----------|
| <i>D17Wsu104e</i>    | chr17:56175743-56183920   | 15.0225  | 14.0981  | -0.0916 | 0.273323 |
| <i>2310009B15Rik</i> | chr1:138851978-138856854  | 5.8129   | 5.0455   | -0.2043 | 0.445258 |
| <i>Rab22a</i>        | chr2:173659759-173707343  | 9.1515   | 8.6897   | -0.0747 | 0.198736 |
| <i>Map9</i>          | chr3:82358071-82395268    | 0.2312   | 0.1917   | -0.2700 | 0.223634 |
| <i>Fgr</i>           | chr4:132974094-133001910  | 2.1506   | 2.3209   | 0.1100  | 0.592277 |
| <i>Gm15674</i>       | chr1:130422823-130437914  | 9.1482   | 9.7765   | 0.0958  | 0.662923 |
| <i>Gm11281</i>       | chr13:21953052-21953628   | 2.4881   | 2.0702   | -0.2653 | 0.289499 |
| <i>Cstf2</i>         | chrX:134059186-134086819  | 13.8081  | 14.0748  | 0.0276  | 0.412813 |
| <i>Tspyl1</i>        | chr10:34282189-34284885   | 40.5809  | 38.1568  | -0.0889 | 0.392127 |
| <i>Gm24119</i>       | chr10:91118290-91118536   | 259.2891 | 234.7269 | -0.1436 | 0.578092 |
| <i>Prr15l</i>        | chr11:96928103-96937830   | 0.5155   | 0.5848   | 0.1819  | 0.289812 |
| <i>Slc10a1</i>       | chr12:80953184-80968079   | 6.9451   | 6.2809   | -0.1450 | 0.488914 |
| <i>Aaed1</i>         | chr13:64291835-64312710   | 38.8901  | 35.2372  | -0.1423 | 0.526775 |
| <i>Exoc3</i>         | chr13:74169804-74208700   | 22.9053  | 23.4663  | 0.0349  | 0.522143 |
| <i>Ran</i>           | chr5:129020068-129024323  | 31.4366  | 29.2921  | -0.1019 | 0.432593 |
| <i>Trim24</i>        | chr6:37870810-37966296    | 8.3727   | 8.6680   | 0.0500  | 0.656434 |
| <i>Bid</i>           | chr6:120891929-120916853  | 9.5616   | 9.0049   | -0.0866 | 0.258518 |
| <i>Fosb</i>          | chr7:19302720-19310045    | 0.4315   | 0.4964   | 0.2022  | 0.376107 |
| <i>Mctp2</i>         | chr7:72077831-72306595    | 26.0771  | 26.8389  | 0.0415  | 0.648194 |
| <i>Sbf2</i>          | chr7:110308012-110614922  | 0.2216   | 0.2538   | 0.1957  | 0.552469 |
| <i>Bola2</i>         | chr7:126695400-126697058  | 43.1613  | 48.3554  | 0.1639  | 0.543935 |
| <i>Ypel3</i>         | chr7:126776954-126780514  | 34.3967  | 31.9838  | -0.1049 | 0.500317 |
| <i>Cnpt</i>          | chr8:105844677-105852008  | 8.9419   | 9.4004   | 0.0721  | 0.556719 |
| <i>Acsf3</i>         | chr8:122775504-122817880  | 3.4750   | 3.1524   | -0.1406 | 0.376486 |
| <i>Zfp202</i>        | chr9:40192315-40213604    | 2.8046   | 2.9777   | 0.0864  | 0.605135 |
| <i>Cln6</i>          | chr9:62838784-62852006    | 3.2587   | 3.4846   | 0.0967  | 0.516361 |
| <i>Fyco1</i>         | chr9:123789509-123851899  | 16.2427  | 16.8996  | 0.0572  | 0.691554 |
| <i>Slc38a1</i>       | chr15:96571417-96642913   | 24.7380  | 23.2374  | -0.0903 | 0.478804 |
| <i>A330035P11Rik</i> | chr14:122103429-122106974 | 2.5623   | 2.8069   | 0.1315  | 0.611604 |
| <i>Capn15</i>        | chr17:25959555-25985680   | 3.6504   | 3.3521   | -0.1230 | 0.406593 |
| <i>Cebpz</i>         | chr17:78919005-78937070   | 40.9305  | 42.1208  | 0.0414  | 0.604965 |
| <i>4930562C15Rik</i> | chr16:4835415-4867691     | 0.3547   | 0.2913   | -0.2843 | 0.530860 |
| <i>1700021K19Rik</i> | chr16:32821702-32877766   | 3.8348   | 3.9658   | 0.0484  | 0.474162 |
| <i>Dopey2</i>        | chr16:93711906-93810585   | 9.8281   | 10.3391  | 0.0731  | 0.688161 |
| <i>Etf1</i>          | chr18:34902784-34932007   | 59.8798  | 61.6910  | 0.0430  | 0.591088 |
| <i>Rabepk</i>        | chr2:34777555-34799912    | 7.9491   | 8.2391   | 0.0517  | 0.591365 |
| <i>Dhx35</i>         | chr2:158794806-158858214  | 7.3666   | 7.5846   | 0.0421  | 0.500685 |
| <i>Wdr47</i>         | chr3:108591278-108645719  | 6.2905   | 5.8722   | -0.0993 | 0.373183 |
| <i>Trp53inp1</i>     | chr4:11156430-11174379    | 99.7442  | 94.5597  | -0.0770 | 0.327823 |
| <i>Thrap3</i>        | chr4:126164081-126202760  | 28.9542  | 29.4021  | 0.0221  | 0.491953 |
| <i>Gda</i>           | chr19:21391306-21473445   | 0.1029   | 0.1417   | 0.4613  | 0.657593 |
| <i>Sertad3</i>       | chr7:27473767-27477359    | 11.8097  | 12.8148  | 0.1178  | 0.630765 |
| <i>Dnase2a</i>       | chr8:84908559-84922915    | 1.2647   | 1.3636   | 0.1087  | 0.496762 |
| <i>Gm24846</i>       | chr7:104264682-104264790  | 23.9414  | 20.5046  | -0.2236 | 0.422090 |
| <i>S100a9</i>        | chr3:90692631-90695721    | 9.3608   | 12.8336  | 0.4552  | 0.594614 |
| <i>Atg4a</i>         | chrX:140956906-141164270  | 5.7744   | 6.0841   | 0.0754  | 0.572345 |
| <i>Ryr3</i>          | chr2:112631354-113217096  | 0.2510   | 0.2718   | 0.1150  | 0.430696 |
| <i>A1504432</i>      | chr3:107039503-107054347  | 28.8654  | 26.9397  | -0.0996 | 0.497122 |
| <i>Rmdn1</i>         | chr4:19575161-19606932    | 6.5197   | 6.0169   | -0.1158 | 0.290934 |
| <i>Gm12265</i>       | chr11:60240809-60241930   | 3.8262   | 3.1608   | -0.2757 | 0.490533 |
| <i>Nup88</i>         | chr11:70943057-70969973   | 14.1639  | 14.4493  | 0.0288  | 0.451634 |
| <i>Pafah1b1</i>      | chr11:74673948-74724670   | 42.5664  | 40.2781  | -0.0797 | 0.380116 |
| <i>Rasl11b</i>       | chr5:74195295-74199478    | 0.9219   | 1.0758   | 0.2227  | 0.519123 |
| <i>Gm15473</i>       | chr6:17058805-17064996    | 1.0007   | 0.8221   | -0.2837 | 0.142084 |
| <i>Hpgds</i>         | chr6:65117292-65144908    | 1.2382   | 1.3397   | 0.1137  | 0.318287 |
| <i>Prcp</i>          | chr7:92875252-92934573    | 4.1709   | 4.4475   | 0.0926  | 0.541690 |
| <i>Pgrmc1</i>        | chrX:36598205-36606079    | 20.9188  | 21.5150  | 0.0405  | 0.540560 |
| <i>Gm26724</i>       | chr17:27201031-27203071   | 5.8695   | 5.3299   | -0.1391 | 0.435594 |
| <i>Pglyrp2</i>       | chr17:32413099-32424167   | 51.1967  | 48.8132  | -0.0688 | 0.146171 |
| <i>Ppp1r18</i>       | chr17:35865592-35875596   | 34.5379  | 32.4346  | -0.0906 | 0.431981 |
| <i>Gm5499</i>        | chr17:87078262-87080230   | 0.6304   | 0.4937   | -0.3526 | 0.488177 |
| <i>Vwa3b</i>         | chr1:37026595-37076996    | 1.5226   | 1.3041   | -0.2235 | 0.470992 |
| <i>Fam166a</i>       | chr2:25218744-25222280    | 2.5837   | 2.8521   | 0.1426  | 0.200161 |
| <i>5330438D12Rik</i> | chr10:116581280-116583515 | 5.8334   | 5.4155   | -0.1072 | 0.229363 |
| <i>Mrps24</i>        | chr11:5703982-5715680     | 24.4074  | 22.2210  | -0.1354 | 0.529593 |
| <i>Foxn3</i>         | chr12:99194979-99450111   | 14.4863  | 15.1611  | 0.0657  | 0.673707 |
| <i>Slc6a19</i>       | chr13:73679744-73704865   | 18.1061  | 16.4515  | -0.1383 | 0.601354 |
| <i>Abhd1</i>         | chr5:30950065-30955091    | 12.9119  | 13.5448  | 0.0690  | 0.558514 |
| <i>lft81</i>         | chr5:122550203-122614518  | 0.5838   | 0.4927   | -0.2447 | 0.403337 |
| <i>Pitpnm2os1</i>    | chr5:124229724-124237137  | 0.9431   | 0.7821   | -0.2701 | 0.367990 |
| <i>Gm9047</i>        | chr6:29471436-29473465    | 1.2467   | 1.5031   | 0.2698  | 0.250136 |

|                      |                           |          |          |         |          |
|----------------------|---------------------------|----------|----------|---------|----------|
| <i>Gimap7</i>        | chr6:48718620-48724636    | 103.0237 | 95.8023  | -0.1048 | 0.488960 |
| <i>Cd69</i>          | chr6:129267323-129275369  | 100.0659 | 103.1615 | 0.0440  | 0.667724 |
| <i>Tacc1</i>         | chr8:25154551-25201449    | 39.5418  | 40.2451  | 0.0254  | 0.625136 |
| <i>Khd3</i>          | chr9:73101835-73104443    | 0.9999   | 1.1631   | 0.2181  | 0.603822 |
| <i>Sgsm3</i>         | chr15:80977764-81012289   | 1.9649   | 1.7935   | -0.1317 | 0.350059 |
| <i>Pibf1</i>         | chr14:99099432-99254493   | 9.4875   | 9.8814   | 0.0587  | 0.596434 |
| <i>Rin1</i>          | chr19:5050807-5057071     | 0.2471   | 0.1975   | -0.3231 | 0.331192 |
| <i>Ide</i>           | chr19:37268742-37337852   | 17.8918  | 18.2248  | 0.0266  | 0.512812 |
| <i>Pdzd8</i>         | chr19:59296083-59345780   | 22.8591  | 23.5747  | 0.0445  | 0.662197 |
| <i>Gm6085</i>        | chr1:4687933-4689403      | 13.2269  | 12.2218  | -0.1140 | 0.411832 |
| <i>Gm16286</i>       | chr18:80206764-80212741   | 43.3615  | 41.2340  | -0.0726 | 0.233620 |
| <i>Rc3h2</i>         | chr2:37370068-37422903    | 17.7585  | 16.8383  | -0.0768 | 0.366646 |
| <i>Prcc</i>          | chr3:87858899-87885608    | 21.2737  | 22.4046  | 0.0747  | 0.673142 |
| <i>A930002121Rik</i> | chr3:107090879-107098401  | 16.5174  | 15.2432  | -0.1158 | 0.453802 |
| <i>lft74</i>         | chr4:94614490-94693229    | 2.8740   | 3.1280   | 0.1222  | 0.594245 |
| <i>Gm17029</i>       | chr4:148960296-148984671  | 2.4416   | 2.5610   | 0.0689  | 0.494136 |
| <i>Rpa1</i>          | chr11:75298165-75348324   | 42.7665  | 40.7896  | -0.0683 | 0.230343 |
| <i>Nucks1</i>        | chr1:131910457-131936321  | 51.1969  | 52.2844  | 0.0303  | 0.614657 |
| <i>Slc25a46</i>      | chr18:31580167-31609902   | 22.1829  | 22.8617  | 0.0435  | 0.614164 |
| <i>Nipsnap3b</i>     | chr4:53011879-53022060    | 16.0845  | 16.6017  | 0.0457  | 0.455407 |
| <i>Katnal1</i>       | chr5:148874331-148995223  | 0.6584   | 0.5992   | -0.1360 | 0.324007 |
| <i>Gm23455</i>       | chr9:15316488-15316588    | 341.2305 | 354.0697 | 0.0533  | 0.598572 |
| <i>Spock2</i>        | chr10:60106218-60135198   | 0.6978   | 0.7843   | 0.1687  | 0.655522 |
| <i>Rufy2</i>         | chr10:62980222-63017210   | 13.9052  | 14.2562  | 0.0360  | 0.615144 |
| <i>Pcsk4</i>         | chr10:80321282-80329498   | 0.9934   | 1.1028   | 0.1507  | 0.480070 |
| <i>Pan2</i>          | chr10:128303334-128321358 | 13.0747  | 12.4482  | -0.0708 | 0.116393 |
| <i>Cabp7</i>         | chr11:4736891-4746778     | 3.8052   | 4.0120   | 0.0764  | 0.438348 |
| <i>Phykp1</i>        | chr11:51584756-51604489   | 24.0930  | 24.6882  | 0.0352  | 0.639743 |
| <i>Sap30l</i>        | chr11:57801636-57810217   | 20.8340  | 19.2823  | -0.1117 | 0.428544 |
| <i>Gm11201</i>       | chr11:79023596-79031057   | 2.2464   | 2.6187   | 0.2212  | 0.503957 |
| <i>Map3k14</i>       | chr11:103219761-103267472 | 12.5512  | 11.7869  | -0.0906 | 0.469833 |
| <i>D11Wsu47e</i>     | chr11:113684411-113694647 | 9.2149   | 8.5734   | -0.1041 | 0.380491 |
| <i>Ddx1</i>          | chr12:13219307-13249213   | 38.4124  | 39.3329  | 0.0342  | 0.530363 |
| <i>Immp2l</i>        | chr12:41024089-41955588   | 1.4570   | 1.2694   | -0.1989 | 0.249519 |
| <i>Rdh12</i>         | chr12:79208913-79222665   | 2.7352   | 2.4963   | -0.1318 | 0.359235 |
| <i>Npc2</i>          | chr12:84754559-84773112   | 126.1229 | 117.2923 | -0.1047 | 0.504115 |
| <i>Ociad1</i>        | chr5:73292793-73314077    | 42.3220  | 40.0544  | -0.0794 | 0.345132 |
| <i>Cox18</i>         | chr5:90214723-90224001    | 10.0558  | 10.4273  | 0.0523  | 0.485405 |
| <i>Sdad1</i>         | chr5:92284009-92310024    | 24.4845  | 24.9510  | 0.0272  | 0.509619 |
| <i>Arpc3</i>         | chr5:122391877-122406179  | 78.8896  | 83.2026  | 0.0768  | 0.672178 |
| <i>Nudt1</i>         | chr5:140331859-140338137  | 6.3202   | 6.6946   | 0.0830  | 0.532001 |
| <i>Epha1</i>         | chr6:42358486-42373268    | 2.4228   | 2.6203   | 0.1131  | 0.623191 |
| <i>Tia1</i>          | chr6:86404218-86433403    | 13.0320  | 13.3231  | 0.0319  | 0.626499 |
| <i>Arpc4</i>         | chr6:113378112-113390448  | 76.1012  | 72.2116  | -0.0757 | 0.319677 |
| <i>Zfp112</i>        | chr7:24112313-24127952    | 0.7711   | 0.8462   | 0.1341  | 0.432717 |
| <i>Sirt2</i>         | chr7:28766734-28788665    | 11.0811  | 11.6176  | 0.0682  | 0.643324 |
| <i>Kdelr1</i>        | chr7:45872771-45883731    | 18.0020  | 16.9563  | -0.0863 | 0.261116 |
| <i>Mttr10</i>        | chr7:64287652-64340407    | 2.7601   | 2.8703   | 0.0565  | 0.563340 |
| <i>Asb7</i>          | chr7:66644564-66689596    | 4.2975   | 4.4746   | 0.0582  | 0.561853 |
| <i>Hras</i>          | chr7:141189104-141194005  | 7.2311   | 6.7537   | -0.0986 | 0.360054 |
| <i>Cklf</i>          | chr8:104250902-104264936  | 7.9906   | 7.4433   | -0.1024 | 0.242867 |
| <i>Fam96b</i>        | chr8:104639838-104641965  | 23.4005  | 24.6009  | 0.0722  | 0.605380 |
| <i>Fbxl8</i>         | chr8:105264647-105269326  | 7.8176   | 7.2462   | -0.1095 | 0.398761 |
| <i>Piezo1</i>        | chr8:122481697-122551329  | 10.3288  | 9.6578   | -0.0969 | 0.500875 |
| <i>4930581F22Rik</i> | chr9:35116727-35130922    | 20.4376  | 19.4333  | -0.0727 | 0.230026 |
| <i>Csk</i>           | chr9:57626646-57645653    | 102.7005 | 97.5566  | -0.0741 | 0.322504 |
| <i>NA</i>            | chr9:108104964-108118343  | 0.8950   | 0.7543   | -0.2467 | 0.535265 |
| <i>Fbxl2</i>         | chr9:113963636-114046191  | 4.9667   | 4.5264   | -0.1339 | 0.547166 |
| <i>Gm9083</i>        | chrX:20239468-20240287    | 1.0512   | 1.2688   | 0.2715  | 0.477172 |
| <i>Zfp280c</i>       | chrX:48541624-48594504    | 8.9105   | 9.4289   | 0.0816  | 0.683144 |
| <i>Tmsb15l</i>       | chrX:136954987-136976869  | 7.7157   | 6.7131   | -0.2008 | 0.542569 |
| <i>Ribc1</i>         | chrX:152004581-152016295  | 1.2229   | 1.3852   | 0.1798  | 0.310883 |
| <i>Lynx1</i>         | chr15:74747855-74752979   | 1.4004   | 1.5031   | 0.1022  | 0.418147 |
| <i>NA</i>            | chr15:75979871-75982285   | 8.2518   | 8.6044   | 0.0604  | 0.542275 |
| <i>Mpst</i>          | chr15:78406711-78414002   | 11.4139  | 10.2597  | -0.1538 | 0.546820 |
| <i>Gxylt1</i>        | chr15:93239741-93275161   | 4.8768   | 4.5581   | -0.0975 | 0.433282 |
| <i>Gm26660</i>       | chr14:25355800-25378635   | 0.3738   | 0.4470   | 0.2581  | 0.400860 |
| <i>Ndrq2</i>         | chr14:51905270-51913488   | 6.9366   | 7.3583   | 0.0852  | 0.602810 |
| <i>Scaf8</i>         | chr17:3114971-3198855     | 29.6673  | 30.5765  | 0.0436  | 0.677975 |
| <i>Rpl10a</i>        | chr17:28328470-28331032   | 34.3750  | 32.7132  | -0.0715 | 0.261445 |
| <i>4930451G09Rik</i> | chr16:4968935-4978962     | 0.7346   | 0.8566   | 0.2217  | 0.512936 |

|                   |                           |          |          |         |          |
|-------------------|---------------------------|----------|----------|---------|----------|
| <i>Klhl24</i>     | chr16:20097553-20127744   | 34.1498  | 32.5403  | -0.0697 | 0.208029 |
| <i>Gm15953</i>    | chr16:38512564-38514296   | 1.6531   | 1.8346   | 0.1503  | 0.469623 |
| <i>Mgea5</i>      | chr19:45750260-45783520   | 89.5967  | 90.6772  | 0.0173  | 0.429086 |
| <i>Eif3a</i>      | chr19:60761115-60790693   | 102.5391 | 105.8907 | 0.0464  | 0.655554 |
| <i>Fhl2</i>       | chr1:43123073-43163961    | 4.0147   | 3.6090   | -0.1537 | 0.425978 |
| <i>Lancl1</i>     | chr1:67000516-67038872    | 9.9646   | 9.3844   | -0.0866 | 0.363616 |
| <i>Usp37</i>      | chr1:74435509-74544286    | 16.8829  | 15.8915  | -0.0873 | 0.428228 |
| <i>Dbi</i>        | chr1:120113279-120121078  | 21.9259  | 19.8201  | -0.1457 | 0.561104 |
| <i>Tpr</i>        | chr1:150392837-150449935  | 84.8006  | 86.5678  | 0.0298  | 0.609640 |
| <i>BC034090</i>   | chr1:155212473-155232724  | 0.3527   | 0.2722   | -0.3736 | 0.567167 |
| <i>Prrc2c</i>     | chr1:162670724-162740556  | 39.8916  | 41.8337  | 0.0686  | 0.714326 |
| <i>Sdhc</i>       | chr1:171127164-171150603  | 15.2239  | 14.2727  | -0.0931 | 0.400105 |
| <i>Tmem63a</i>    | chr1:180942343-180975112  | 11.8063  | 11.0634  | -0.0938 | 0.440229 |
| <i>Thoc1</i>      | chr18:9958179-9995484     | 31.0549  | 32.0321  | 0.0447  | 0.625458 |
| <i>Cxc1</i>       | chr18:74216130-74221491   | 32.6463  | 33.9249  | 0.0554  | 0.670048 |
| <i>Rpl17</i>      | chr18:75000476-75003381   | 23.2013  | 21.4184  | -0.1154 | 0.408471 |
| <i>Dym</i>        | chr18:75018771-75286966   | 11.9314  | 12.4190  | 0.0578  | 0.602823 |
| <i>BC029214</i>   | chr2:25455140-25461094    | 19.7242  | 18.5345  | -0.0897 | 0.310958 |
| <i>Zc3h15</i>     | chr2:83644434-83664622    | 34.7698  | 35.8483  | 0.0441  | 0.601882 |
| <i>Gm17096</i>    | chr2:166943538-166944308  | 4.2316   | 3.7186   | -0.1864 | 0.243495 |
| <i>Gpr160</i>     | chr3:30855949-30897192    | 2.1229   | 1.9451   | -0.1262 | 0.360972 |
| <i>Proser1</i>    | chr3:53463665-53481755    | 2.5635   | 2.3622   | -0.1180 | 0.399057 |
| <i>Mrpl9</i>      | chr3:94443317-94451130    | 23.7838  | 22.4782  | -0.0815 | 0.302430 |
| <i>Tyw3</i>       | chr3:154576519-154597104  | 2.4903   | 2.3042   | -0.1120 | 0.169632 |
| <i>Trim14</i>     | chr4:46494818-46536141    | 13.2825  | 13.8227  | 0.0575  | 0.657710 |
| <i>Tmem245</i>    | chr4:56866922-56947437    | 5.2216   | 5.4800   | 0.0697  | 0.704719 |
| <i>A1314180</i>   | chr4:58798910-58912749    | 10.0947  | 10.4120  | 0.0447  | 0.659946 |
| <i>Mier1</i>      | chr4:103114389-103165754  | 19.5134  | 19.9638  | 0.0329  | 0.591437 |
| <i>Txndc12</i>    | chr4:108834600-108862127  | 17.2078  | 18.0377  | 0.0679  | 0.645803 |
| <i>Gm12977</i>    | chr4:133871829-133876533  | 12.2391  | 11.3818  | -0.1048 | 0.196178 |
| <i>Mknk2</i>      | chr10:80665331-80671976   | 101.9242 | 96.3619  | -0.0810 | 0.399413 |
| <i>Slc25a35</i>   | chr11:68968130-68974365   | 1.2428   | 1.3749   | 0.1457  | 0.559617 |
| <i>Gm21988</i>    | chr11:70235205-70239830   | 20.6850  | 21.9971  | 0.0887  | 0.662745 |
| <i>Gm11737</i>    | chr11:118204711-118205179 | 9.6304   | 8.4607   | -0.1868 | 0.498644 |
| <i>Sap25</i>      | chr5:137641333-137642902  | 20.3099  | 18.9992  | -0.0962 | 0.429388 |
| <i>Zfp566</i>     | chr7:30077336-30090527    | 4.8454   | 4.4436   | -0.1249 | 0.195685 |
| <i>Gm12774</i>    | chr7:34383658-34384074    | 5.1176   | 4.3743   | -0.2264 | 0.361005 |
| <i>Ddias</i>      | chr7:92857528-92874213    | 1.6972   | 1.4924   | -0.1855 | 0.547371 |
| <i>Clpb</i>       | chr7:101663632-101790168  | 4.3002   | 4.0629   | -0.0819 | 0.195079 |
| <i>Ctbp2</i>      | chr7:132987562-133124354  | 0.3362   | 0.2888   | -0.2191 | 0.287443 |
| <i>Gins4</i>      | chr8:23226609-23237668    | 29.5093  | 30.4559  | 0.0456  | 0.563226 |
| <i>Rbm5</i>       | chr9:107740370-107770996  | 37.6324  | 38.2424  | 0.0232  | 0.634027 |
| <i>Nlgn3</i>      | chrX:101299167-101325963  | 0.0706   | 0.0873   | 0.3058  | 0.275179 |
| <i>Sh3bgr1</i>    | chrX:109095364-109197873  | 13.0752  | 12.2481  | -0.0943 | 0.411022 |
| <i>Slc45a4</i>    | chr15:73577423-73645762   | 2.2022   | 2.0050   | -0.1354 | 0.557211 |
| <i>Mrps16</i>     | chr14:20391230-20393555   | 50.7646  | 46.8756  | -0.1150 | 0.451021 |
| <i>Sod1</i>       | chr16:90220741-90226322   | 98.6933  | 103.3349 | 0.0663  | 0.645991 |
| <i>Aff3</i>       | chr1:38177325-38664955    | 20.0998  | 18.8815  | -0.0902 | 0.485922 |
| <i>Gm12353</i>    | chr4:19605450-19651130    | 7.8425   | 6.9494   | -0.1744 | 0.449262 |
| <i>Bsdc1</i>      | chr4:129461580-129488498  | 12.1071  | 11.4899  | -0.0755 | 0.288178 |
| <i>Sebox</i>      | chr11:78503448-78505081   | 0.6785   | 0.8147   | 0.2640  | 0.403206 |
| <i>Gbp8</i>       | chr5:105014152-105139540  | 51.3286  | 53.4384  | 0.0581  | 0.678220 |
| <i>Pum1</i>       | chr4:130663320-130781564  | 28.0541  | 26.7599  | -0.0681 | 0.303667 |
| <i>Rgs10</i>      | chr7:128373620-128418758  | 87.9247  | 91.5814  | 0.0588  | 0.656941 |
| <i>Chaf1a</i>     | chr17:56040415-56068026   | 3.0398   | 3.2617   | 0.1016  | 0.637506 |
| <i>Commdb8</i>    | chr5:72156999-72168183    | 33.1534  | 31.2507  | -0.0853 | 0.390010 |
| <i>Gm12316</i>    | chr11:70611211-70613211   | 8.7880   | 9.8367   | 0.1626  | 0.602670 |
| <i>Myo19</i>      | chr11:84880147-84911226   | 1.4515   | 1.5591   | 0.1032  | 0.653241 |
| <i>Psmc1</i>      | chr12:100110185-100123364 | 51.3132  | 53.1453  | 0.0506  | 0.632959 |
| <i>Zfp68</i>      | chr5:138604615-138619761  | 26.6797  | 27.5956  | 0.0487  | 0.619347 |
| <i>Trpv6</i>      | chr6:41620620-41636405    | 0.6826   | 0.5784   | -0.2389 | 0.389661 |
| <i>G6pdx</i>      | chrX:74409482-74429194    | 13.8511  | 14.2513  | 0.0411  | 0.560851 |
| <i>Reps1</i>      | chr10:18055860-18125155   | 15.5555  | 15.9581  | 0.0369  | 0.669940 |
| <i>Gm13154</i>    | chr4:147553276-147585198  | 0.5817   | 0.5664   | -0.3499 | 0.513669 |
| <i>Vwa7</i>       | chr17:35016578-35026741   | 0.2875   | 0.3365   | 0.2272  | 0.390273 |
| <i>Camkk2</i>     | chr5:122731172-122779410  | 7.5987   | 7.1805   | -0.0817 | 0.240227 |
| <i>D10Wsu102e</i> | chr10:83360220-83368835   | 23.3927  | 22.3482  | -0.0659 | 0.028483 |
| <i>Dixdc1</i>     | chr9:50662751-50739517    | 0.2317   | 0.2661   | 0.1995  | 0.604877 |
| <i>Trex1</i>      | chr9:109057932-109060338  | 32.1543  | 33.3270  | 0.0517  | 0.648918 |
| <i>Ddr1</i>       | chr17:35681566-35704621   | 1.0047   | 0.8943   | -0.1680 | 0.458351 |
| <i>Tnfrsf21</i>   | chr17:43016554-43089188   | 0.4918   | 0.5736   | 0.2221  | 0.603616 |

|                      |                           |          |          |         |          |
|----------------------|---------------------------|----------|----------|---------|----------|
| <i>Ehbp1</i>         | chr11:22005827-22342292   | 0.1647   | 0.2000   | 0.2798  | 0.576457 |
| <i>Sft2d3</i>        | chr18:31909093-31911903   | 9.4782   | 9.7660   | 0.0432  | 0.339772 |
| <i>Chst12</i>        | chr5:140505549-140525724  | 4.5750   | 4.9275   | 0.1071  | 0.634805 |
| <i>Mxd1</i>          | chr6:86647043-86669159    | 6.1616   | 5.7128   | -0.1091 | 0.499209 |
| <i>Trappc6a</i>      | chr7:19508669-19516145    | 17.1269  | 15.8904  | -0.1081 | 0.434303 |
| <i>S1pr2</i>         | chr9:20965951-20976793    | 2.2523   | 2.0422   | -0.1412 | 0.294796 |
| <i>Snord14d</i>      | chr9:40803994-40804080    | 97.5692  | 86.5530  | -0.1728 | 0.526574 |
| <i>Hexa</i>          | chr9:59539666-59565105    | 28.6187  | 29.4612  | 0.0419  | 0.610855 |
| <i>Plxnb1</i>        | chr9:109095435-109119911  | 0.2550   | 0.2181   | -0.2254 | 0.451436 |
| <i>Smpd5</i>         | chr15:76294433-76296896   | 16.1064  | 16.8719  | 0.0670  | 0.663129 |
| <i>Nckap1l</i>       | chr15:103453824-103498800 | 103.3682 | 99.2833  | -0.0582 | 0.100055 |
| <i>Pou4f1</i>        | chr14:104462319-104467991 | 0.1937   | 0.2370   | 0.2910  | 0.402923 |
| <i>4930594M22Rik</i> | chr14:122913029-122937469 | 1.3837   | 1.4929   | 0.1097  | 0.601123 |
| <i>Zfp40</i>         | chr17:23173868-23193252   | 4.6799   | 4.2823   | -0.1281 | 0.532773 |
| <i>Tb13</i>          | chr17:24697948-24707660   | 9.4515   | 8.9024   | -0.0864 | 0.344918 |
| <i>Boll</i>          | chr1:55248657-55363469    | 2.9567   | 3.2146   | 0.1207  | 0.619710 |
| <i>Api5</i>          | chr2:94411681-94438136    | 34.8740  | 33.0271  | -0.0785 | 0.353066 |
| <i>Zmpste24</i>      | chr4:121059236-121098241  | 8.1164   | 8.3033   | 0.0328  | 0.513075 |
| <i>Gm10689</i>       | chr8:25454272-25454704    | 1.4680   | 1.8319   | 0.3195  | 0.454714 |
| <i>Gm5970</i>        | chr18:60220842-60222058   | 1.0879   | 0.7820   | -0.4763 | 0.620681 |
| <i>Tbc1d32</i>       | chr10:56014297-56228689   | 1.3100   | 1.4061   | 0.1021  | 0.602643 |
| <i>Ggt5</i>          | chr10:75589380-75616968   | 3.9596   | 3.6619   | -0.1128 | 0.406224 |
| <i>Tmpo</i>          | chr10:91147570-91171582   | 39.6983  | 40.6026  | 0.0325  | 0.632783 |
| <i>Bcl6b</i>         | chr11:70224127-70229798   | 0.6897   | 0.5988   | -0.2039 | 0.419381 |
| <i>Gm10840</i>       | chr11:106160849-106161158 | 6.3201   | 5.3405   | -0.2430 | 0.464164 |
| <i>2610035D17Rik</i> | chr11:113043894-113201838 | 8.6360   | 9.0319   | 0.0647  | 0.564967 |
| <i>Wbp2</i>          | chr11:116078572-116086995 | 10.9666  | 11.5020  | 0.0688  | 0.664429 |
| <i>Kidins220</i>     | chr12:24974931-25059697   | 46.1899  | 47.2062  | 0.0314  | 0.683740 |
| <i>F730043M19Rik</i> | chr12:33111710-33147597   | 0.5526   | 0.6237   | 0.1744  | 0.608424 |
| <i>Dcaf5</i>         | chr12:80335846-80436601   | 19.3403  | 19.7590  | 0.0309  | 0.635849 |
| <i>Ttlf5</i>         | chr12:85824658-86061893   | 1.8114   | 1.8727   | 0.0480  | 0.559049 |
| <i>Mir3068</i>       | chr12:87437681-87437817   | 26.8085  | 23.7464  | -0.1750 | 0.313469 |
| <i>Trip11</i>        | chr12:101834042-101913267 | 23.7489  | 24.2899  | 0.0325  | 0.657720 |
| <i>Mirlet7d</i>      | chr13:48536011-48536114   | 17.8003  | 14.7187  | -0.2742 | 0.514160 |
| <i>Gm16125</i>       | chr13:74340538-74340877   | 7.1625   | 6.1268   | -0.2253 | 0.423176 |
| <i>Slbp</i>          | chr5:33634951-33652574    | 17.6473  | 16.6165  | -0.0868 | 0.388610 |
| <i>Hist4h4</i>       | chr6:136801552-136804431  | 15.0348  | 17.0556  | 0.1819  | 0.554720 |
| <i>B230216G23Rik</i> | chr6:142413440-142419730  | 0.5965   | 0.4769   | -0.3230 | 0.466420 |
| <i>Ap2s1</i>         | chr7:16738409-16749294    | 39.4652  | 37.0779  | -0.0900 | 0.415821 |
| <i>B9d2</i>          | chr7:25681157-25686558    | 6.1235   | 5.5607   | -0.1391 | 0.301914 |
| <i>B230322F03Rik</i> | chr7:35555366-35556935    | 2.8869   | 2.5475   | -0.1804 | 0.468143 |
| <i>Lins</i>          | chr7:66689888-66717256    | 2.4370   | 2.5580   | 0.0699  | 0.545872 |
| <i>Cd151</i>         | chr7:141467361-141471479  | 8.0898   | 8.4427   | 0.0616  | 0.552404 |
| <i>Fbxw9</i>         | chr8:85060054-85067124    | 1.1308   | 1.2356   | 0.1279  | 0.440088 |
| <i>Vps26b</i>        | chr9:27004502-27030094    | 26.4576  | 25.2630  | -0.0667 | 0.272445 |
| <i>Kirrel3</i>       | chr9:34486125-35036716    | 0.5343   | 0.4501   | -0.2472 | 0.512328 |
| <i>Rps27l</i>        | chr9:66946085-66949516    | 25.3077  | 27.0526  | 0.0962  | 0.668028 |
| <i>Abhd5</i>         | chr9:122351607-122381524  | 3.6128   | 3.8028   | 0.0739  | 0.553621 |
| <i>Fam50a</i>        | chrX:74313032-74320149    | 15.6756  | 14.6487  | -0.0977 | 0.421039 |
| <i>Gm650</i>         | chrX:155304198-155305749  | 0.9970   | 1.1667   | 0.2268  | 0.574039 |
| <i>Cdpf1</i>         | chr15:85806971-85811697   | 14.8959  | 13.8319  | -0.1069 | 0.368051 |
| <i>Styx</i>          | chr14:45351472-45373585   | 2.0086   | 2.3781   | 0.2437  | 0.551424 |
| <i>Gm26778</i>       | chr14:102978219-102982528 | 3.2140   | 3.4562   | 0.1048  | 0.665926 |
| <i>NA</i>            | chr14:102978219-102982528 | 3.2140   | 3.4562   | 0.1048  | 0.665926 |
| <i>Btnl7-ps</i>      | chr17:34532876-34547651   | 1.4982   | 1.2979   | -0.2071 | 0.423120 |
| <i>NA</i>            | chr16:18923072-18925657   | 2.8763   | 2.5272   | -0.1867 | 0.057423 |
| <i>Gm25395</i>       | chr1:87776937-87777209    | 598.3317 | 549.9833 | -0.1216 | 0.558223 |
| <i>AA543186</i>      | chr2:25327449-25332571    | 1.0689   | 0.9036   | -0.2423 | 0.337269 |
| <i>Casc4</i>         | chr2:121866969-121936220  | 7.7804   | 8.0712   | 0.0529  | 0.595104 |
| <i>Taf4a</i>         | chr2:179912145-179976646  | 8.7684   | 8.2191   | -0.0933 | 0.462287 |
| <i>Gpr89</i>         | chr3:96868280-96905346    | 6.2100   | 5.7353   | -0.1147 | 0.528018 |
| <i>Gm15602</i>       | chr3:103902526-103902963  | 3.7633   | 4.2900   | 0.1890  | 0.369399 |
| <i>Cd52</i>          | chr4:134082447-134095082  | 723.8481 | 756.2005 | 0.0631  | 0.690460 |
| <i>Ece1</i>          | chr4:137862236-137965229  | 6.8884   | 6.5139   | -0.0807 | 0.245522 |
| <i>Atcay</i>         | chr10:81204507-81230833   | 0.2375   | 0.2893   | 0.2846  | 0.567120 |
| <i>PPP2r3d</i>       | chr9:124422621-124424154  | 4.7091   | 5.3773   | 0.1914  | 0.543260 |
| <i>Gm11131</i>       | chr17:35377020-35380292   | 48.2687  | 45.7511  | -0.0773 | 0.367403 |
| <i>Tnik</i>          | chr3:28263213-28675858    | 20.6840  | 19.8462  | -0.0597 | 0.164678 |
| <i>Katna1</i>        | chr10:7725999-7763150     | 31.4894  | 32.4512  | 0.0434  | 0.617194 |
| <i>1700001K19Rik</i> | chr12:110667688-110682619 | 1.0931   | 0.8821   | -0.3094 | 0.324542 |
| <i>Eef2k</i>         | chr7:120842830-120907219  | 4.0489   | 4.2089   | 0.0559  | 0.616492 |

|                      |                           |          |          |         |          |
|----------------------|---------------------------|----------|----------|---------|----------|
| <i>Alg9</i>          | chr9:50775018-50843542    | 5.0230   | 5.2372   | 0.0602  | 0.602409 |
| <i>Trim15</i>        | chr17:36860692-36867210   | 1.0456   | 0.8672   | -0.2699 | 0.494020 |
| <i>Eml4</i>          | chr17:83350930-83480361   | 34.9235  | 35.5563  | 0.0259  | 0.576966 |
| <i>Trim44</i>        | chr2:102300118-102407828  | 25.9070  | 26.5427  | 0.0350  | 0.654610 |
| <i>1110032F04Rik</i> | chr3:68869585-68872163    | 1.5341   | 1.3640   | -0.1696 | 0.334338 |
| <i>Rpl27</i>         | chr11:101442297-101445529 | 12.7354  | 11.8123  | -0.1086 | 0.400124 |
| <i>Ikbkg</i>         | chrX:74393289-74453854    | 15.2908  | 14.5587  | -0.0708 | 0.269815 |
| <i>Med12</i>         | chrX:101274029-101297465  | 34.7545  | 32.9424  | -0.0773 | 0.440260 |
| <i>Trib1</i>         | chr15:59648349-59656550   | 0.3826   | 0.3289   | -0.2183 | 0.343020 |
| <i>Csnk2b</i>        | chr17:35116195-35122053   | 42.0047  | 44.0175  | 0.0675  | 0.681338 |
| <i>Gm20939</i>       | chr17:94873985-94877497   | 3.6963   | 4.0101   | 0.1176  | 0.590519 |
| <i>Ube2l3</i>        | chr16:17152012-17202649   | 8.5865   | 8.8108   | 0.0372  | 0.571211 |
| <i>Alg5</i>          | chr3:54735538-54751127    | 9.6616   | 9.9324   | 0.0399  | 0.539196 |
| <i>Ssbp2</i>         | chr13:91460282-91703429   | 6.8199   | 7.0045   | 0.0386  | 0.602863 |
| <i>Hvcn1</i>         | chr5:122206803-122242297  | 54.3857  | 51.5796  | -0.0764 | 0.348448 |
| <i>Gm24814</i>       | chr16:8738320-8738390     | 26.7629  | 31.1232  | 0.2178  | 0.571115 |
| <i>Zfp217</i>        | chr2:170108642-170148103  | 31.3217  | 29.9461  | -0.0648 | 0.291178 |
| <i>Nup37</i>         | chr10:88146991-88178388   | 10.5742  | 11.0061  | 0.0578  | 0.426202 |
| <i>Tex261</i>        | chr6:83768880-83775812    | 21.5275  | 22.0094  | 0.0319  | 0.603186 |
| <i>Mpp1</i>          | chrX:75109732-75131016    | 12.0580  | 11.3770  | -0.0839 | 0.372882 |
| <i>Nmi</i>           | chr2:51948486-51973494    | 40.7794  | 42.5398  | 0.0610  | 0.669209 |
| <i>Gm12942</i>       | chr4:127123690-127129644  | 7.4256   | 6.8532   | -0.1157 | 0.464821 |
| <i>Dna2</i>          | chr10:62947025-62974185   | 0.6432   | 0.7235   | 0.1698  | 0.678515 |
| <i>Pip5k1b</i>       | chr19:24294793-24555872   | 0.2069   | 0.1634   | -0.3409 | 0.324993 |
| <i>Cep290</i>        | chr10:100488288-100573655 | 1.0452   | 1.1108   | 0.0878  | 0.559032 |
| <i>Mrpl10</i>        | chr11:97041559-97049213   | 30.8963  | 31.9575  | 0.0487  | 0.654069 |
| <i>Osbp17</i>        | chr11:97050627-97068904   | 6.9478   | 6.4923   | -0.0978 | 0.493738 |
| <i>Nkiras2</i>       | chr11:100619243-100627607 | 7.6928   | 7.9789   | 0.0527  | 0.614295 |
| <i>Pecam1</i>        | chr11:106654216-106750628 | 51.9151  | 52.8224  | 0.0250  | 0.621111 |
| <i>Zfp125</i>        | chr12:20899821-20900867   | 6.6483   | 7.2971   | 0.1343  | 0.567930 |
| <i>Wdr86</i>         | chr5:24711737-24730727    | 0.5907   | 0.6557   | 0.1506  | 0.515502 |
| <i>Ugdh</i>          | chr5:65413201-65435946    | 4.4355   | 4.5689   | 0.0428  | 0.509779 |
| <i>Tmf1</i>          | chr6:97155265-97179124    | 46.1237  | 43.8800  | -0.0719 | 0.303953 |
| <i>Gm20457</i>       | chr7:64337549-64345964    | 4.8902   | 5.4037   | 0.1441  | 0.584633 |
| <i>Homer3</i>        | chr8:70282826-70294361    | 6.6439   | 6.2170   | -0.0958 | 0.354915 |
| <i>Ist1</i>          | chr8:109671321-109693294  | 59.1179  | 56.4630  | -0.0663 | 0.222929 |
| <i>Herc1</i>         | chr9:66350449-66508775    | 28.2889  | 26.9942  | -0.0676 | 0.325719 |
| <i>Srpb</i>          | chr9:103188032-103202137  | 12.0430  | 11.4214  | -0.0765 | 0.282654 |
| <i>Rad54l2</i>       | chr9:106688081-106789213  | 9.0094   | 8.5264   | -0.0795 | 0.412888 |
| <i>Gm6285</i>        | chrX:104947784-104948282  | 1.3975   | 1.7295   | 0.3075  | 0.446022 |
| <i>Bhlhb9</i>        | chrX:135885850-135891081  | 9.0290   | 8.5155   | -0.0845 | 0.139864 |
| <i>Trmt12</i>        | chr15:58872648-58876781   | 5.7277   | 5.9294   | 0.0499  | 0.532307 |
| <i>Prkag1</i>        | chr15:98812797-98831508   | 73.7617  | 75.4016  | 0.0317  | 0.578109 |
| <i>Il3ra</i>         | chr14:14346494-14355490   | 2.1207   | 2.4226   | 0.1920  | 0.630944 |
| <i>Xpo4</i>          | chr14:57581001-57665430   | 11.6100  | 10.9003  | -0.0910 | 0.458591 |
| <i>Atp6v0e</i>       | chr17:26676395-26699644   | 19.9383  | 18.8373  | -0.0820 | 0.338333 |
| <i>Ranbp3</i>        | chr17:56673224-56711769   | 45.5885  | 46.5394  | 0.0298  | 0.651488 |
| <i>Gm26158</i>       | chr19:60775520-60775639   | 12.2528  | 14.4699  | 0.2399  | 0.602614 |
| <i>Pikfyve</i>       | chr1:65186749-65274012    | 17.3194  | 16.3701  | -0.0813 | 0.403230 |
| <i>Zfp516</i>        | chr18:82910878-83005314   | 1.3644   | 1.2323   | -0.1469 | 0.524075 |
| <i>Agps</i>          | chr2:75832176-75931350    | 15.6360  | 14.8238  | -0.0770 | 0.370696 |
| <i>Vapb</i>          | chr2:173737510-173784336  | 7.5068   | 7.1364   | -0.0730 | 0.118585 |
| <i>Hax1</i>          | chr3:89995456-89998686    | 7.0136   | 7.5260   | 0.1017  | 0.546978 |
| <i>Abca1</i>         | chr4:53030786-53159895    | 7.3165   | 7.7637   | 0.0856  | 0.712432 |
| <i>Gm12799</i>       | chr4:102046567-102049127  | 0.5197   | 0.6080   | 0.2264  | 0.433151 |
| <i>Spata6</i>        | chr4:111719983-111829184  | 13.3617  | 13.7020  | 0.0363  | 0.551707 |
| <i>Med18</i>         | chr4:132458730-132463921  | 7.1648   | 6.5401   | -0.1316 | 0.491535 |
| <i>Zfp593</i>        | chr4:134243288-134245592  | 10.9703  | 11.4887  | 0.0666  | 0.612270 |
| <i>Fuca2</i>         | chr10:13499539-13519035   | 4.9692   | 4.6095   | -0.1084 | 0.486736 |
| <i>Slc36a3os</i>     | chr11:55137043-55140193   | 5.2997   | 4.4898   | -0.2393 | 0.489183 |
| <i>Bcas3</i>         | chr11:85353166-85826058   | 9.5952   | 8.9936   | -0.0934 | 0.482997 |
| <i>Ppp1r9b</i>       | chr11:94991034-95006899   | 56.0839  | 58.2393  | 0.0544  | 0.710973 |
| <i>Fam195b</i>       | chr11:120542887-120549727 | 22.8433  | 21.2502  | -0.1043 | 0.470662 |
| <i>Bdp1</i>          | chr13:100017993-100104070 | 25.5035  | 26.1985  | 0.0388  | 0.640507 |
| <i>Bhlha15</i>       | chr5:144190285-144194441  | 1.0482   | 0.9155   | -0.1953 | 0.512660 |
| <i>Prss2</i>         | chr6:41521786-41525079    | 2.0075   | 2.2648   | 0.1740  | 0.281090 |
| <i>Trbj1-7</i>       | chr6:41535641-41535686    | 123.2979 | 109.7649 | -0.1677 | 0.442261 |
| <i>Apobec1</i>       | chr6:122577791-122602444  | 8.0960   | 8.5318   | 0.0757  | 0.667172 |
| <i>Tfpt</i>          | chr7:3620323-3629929      | 15.3781  | 14.1718  | -0.1179 | 0.502536 |
| <i>Rnf121</i>        | chr7:102019136-102065469  | 5.4703   | 5.1298   | -0.0927 | 0.295440 |
| <i>Pdzd9</i>         | chr7:120659295-120670343  | 2.2812   | 2.0173   | -0.1774 | 0.428918 |



|               |                          |          |           |         |          |
|---------------|--------------------------|----------|-----------|---------|----------|
| Gm10311       | chr8:69373527-69373914   | 3.6641   | 4.1706    | 0.1868  | 0.267616 |
| Ogfod1        | chr8:94037197-94067921   | 6.7270   | 6.9266    | 0.0422  | 0.519399 |
| Gm8730        | chr8:102864778-102865853 | 0.8461   | 0.6824    | -0.3102 | 0.226043 |
| Smco4         | chr9:15505486-15545260   | 3.5687   | 3.1654    | -0.1730 | 0.376834 |
| Zpr1          | chr9:46273063-46282643   | 26.5269  | 25.1864   | -0.0748 | 0.313994 |
| Mns1          | chr9:72438528-72458574   | 11.3975  | 10.5014   | -0.1181 | 0.500810 |
| Cmc1          | chr9:118064528-118150196 | 16.1729  | 16.7297   | 0.0488  | 0.384058 |
| Gm15232       | chrX:167088092-167102090 | 3.4512   | 3.6766    | 0.0913  | 0.591404 |
| Zfp41         | chr15:75616678-75625300  | 1.5886   | 1.6955    | 0.0939  | 0.516814 |
| Rps24         | chr14:24490680-24496146  | 912.7198 | 1024.6432 | 0.1669  | 0.548796 |
| H2-Eb1        | chr17:34305882-34316199  | 2.7969   | 3.1274    | 0.1612  | 0.662300 |
| Tfg           | chr16:56690331-56717450  | 15.5216  | 16.0922   | 0.0521  | 0.591916 |
| Pigp          | chr16:94358762-94371015  | 12.1557  | 11.3565   | -0.0981 | 0.368985 |
| Gcnt1         | chr19:17326140-17356667  | 0.1295   | 0.1673    | 0.3698  | 0.558701 |
| 4833407H14Rik | chr19:53460630-53462723  | 5.7589   | 6.2990    | 0.1293  | 0.691488 |
| Psmc14        | chr2:61711693-61800376   | 34.6876  | 35.5531   | 0.0356  | 0.616911 |
| Dnajc19       | chr3:34056019-34081321   | 10.4677  | 10.8289   | 0.0489  | 0.588658 |
| Clk2          | chr3:89164794-89176921   | 20.0000  | 19.1142   | -0.0654 | 0.220493 |
| Tuft1         | chr3:94612756-94658872   | 1.8246   | 1.6386    | -0.1551 | 0.418534 |
| Pde4b         | chr4:102087542-102607259 | 13.6104  | 13.8904   | 0.0294  | 0.619522 |
| Gm13038       | chr4:143152571-143153030 | 6.0133   | 6.5857    | 0.1312  | 0.313195 |
| Mrops26       | chr2:130563741-130568695 | 9.6140   | 9.0609    | -0.0855 | 0.334942 |
| Pcsk1         | chr13:75089825-75132498  | 2.2956   | 1.8015    | -0.3497 | 0.552222 |
| Atn1          | chr6:124739188-124756524 | 24.0541  | 25.3812   | 0.0775  | 0.694960 |
| Tmsb15b2      | chrX:136955264-136975497 | 11.2353  | 9.8283    | -0.1930 | 0.558273 |
| Fndc3a        | chr14:72537945-72710003  | 10.1697  | 10.4143   | 0.0343  | 0.631212 |
| Tcp1          | chr17:12915700-12925067  | 69.0288  | 65.1715   | -0.0830 | 0.444483 |
| Stk38         | chr17:28970884-29007945  | 48.0372  | 49.0016   | 0.0287  | 0.676425 |
| Bdh1          | chr16:31422279-31458901  | 14.0173  | 13.2458   | -0.0817 | 0.351819 |
| Slc20a1       | chr2:129198763-129211616 | 56.9812  | 54.2566   | -0.0707 | 0.368468 |
| Ift52         | chr2:163017353-163046141 | 13.2058  | 12.5013   | -0.0791 | 0.252416 |
| mt-Ts2        | chrM:11612-11671         | 19.1892  | 15.7577   | -0.2842 | 0.378747 |
| Dph5          | chr3:115888172-115929332 | 44.1543  | 45.2664   | 0.0359  | 0.657844 |
| Gm24468       | chr4:101186763-101186867 | 16.0740  | 18.3463   | 0.1908  | 0.440011 |
| Utp11l        | chr4:124678159-124693600 | 9.0787   | 8.3807    | -0.1154 | 0.489669 |
| Thumpd1       | chr7:119715095-119720765 | 45.3436  | 46.4694   | 0.0354  | 0.636954 |
| Ranbp3l       | chr15:8968425-9066551    | 0.4636   | 0.3853    | -0.2668 | 0.333516 |
| Ppp6r2        | chr15:89253034-89286261  | 17.1118  | 16.1827   | -0.0805 | 0.384492 |
| Ints8         | chr4:11199157-11254258   | 9.2890   | 9.5009    | 0.0325  | 0.588907 |
| Rgp1          | chr4:43578714-43587487   | 9.0969   | 9.3784    | 0.0440  | 0.680623 |
| Best4-ps      | chr4:117145256-117148637 | 0.5535   | 0.6640    | 0.2626  | 0.307897 |
| Adamts14      | chr10:61197111-611273438 | 0.6127   | 0.5378    | -0.1882 | 0.404213 |
| Gm12264       | chr11:59775285-59780321  | 11.5578  | 10.3906   | -0.1536 | 0.406553 |
| Sh3yl1        | chr12:30911667-30960162  | 0.4127   | 0.3367    | -0.2937 | 0.402415 |
| Gm15440       | chr13:51685528-51701041  | 4.4665   | 4.8902    | 0.1307  | 0.647994 |
| Zc3hav1       | chr6:38305285-38354603   | 115.0803 | 117.5507  | 0.0306  | 0.703629 |
| Mcee          | chr7:64392644-64412121   | 6.3133   | 6.7876    | 0.1045  | 0.433293 |
| Nmb           | chr7:80902226-80905076   | 4.7400   | 4.2140    | -0.1697 | 0.313497 |
| Ears2         | chr7:122037212-122067263 | 6.1891   | 5.7841    | -0.0976 | 0.428440 |
| Bbs2          | chr8:94067953-94098811   | 6.8081   | 7.1005    | 0.0607  | 0.606002 |
| Cox4i1        | chr8:120668221-120674207 | 111.2167 | 103.6906  | -0.1011 | 0.517090 |
| Fbxo32        | chr15:58175878-58214892  | 7.8359   | 8.0903    | 0.0461  | 0.645430 |
| Z310061I04Rik | chr17:35892676-35897431  | 3.6489   | 3.8564    | 0.0798  | 0.503603 |
| NA            | chr1:133619870-133661380 | 36.5935  | 37.6131   | 0.0396  | 0.688681 |
| Gm2000        | chr1:156366039-156366484 | 15.6696  | 12.1925   | -0.3620 | 0.467742 |
| Mir1981       | chr1:184822406-184822488 | 14.6908  | 12.0068   | -0.2911 | 0.459270 |
| Tmem203       | chr2:25255438-25256352   | 9.0719   | 9.7003    | 0.0966  | 0.604730 |
| Al182371      | chr2:35084045-35101543   | 0.9961   | 1.1180    | 0.1666  | 0.361289 |
| Arl6ip6       | chr2:53191725-53219220   | 7.7386   | 8.0563    | 0.0580  | 0.584430 |
| Gm25184       | chr2:181512549-181512712 | 6.1045   | 7.7993    | 0.3535  | 0.690452 |
| Vps72         | chr3:95111021-95123051   | 10.7120  | 11.1479   | 0.0575  | 0.639532 |
| Gm17529       | chr12:58953094-58968011  | 1.9967   | 1.8277    | -0.1275 | 0.051875 |
| Cep120        | chr18:53681723-53744547  | 22.6973  | 21.6812   | -0.0661 | 0.262311 |
| 1700113A16Rik | chr3:88171559-88177785   | 10.2573  | 9.3142    | -0.1391 | 0.526056 |
| Lmbr1         | chr5:29229813-29378390   | 0.7960   | 0.8637    | 0.1177  | 0.463801 |
| Gltp          | chr5:114669402-114690984 | 31.0128  | 32.3439   | 0.0606  | 0.683267 |
| Smarca4       | chr9:21616168-21704230   | 34.0840  | 35.2399   | 0.0481  | 0.710714 |
| Gm5867        | chr5:69461150-69461741   | 1.5038   | 1.1425    | -0.3964 | 0.561301 |
| A530054K11Rik | chr13:67617000-67637791  | 12.2798  | 12.6401   | 0.0417  | 0.630238 |
| Zfp692        | chr11:58307068-58314627  | 16.2964  | 15.3593   | -0.0854 | 0.321709 |
| Rab35         | chr5:115631928-115647736 | 37.2337  | 35.3614   | -0.0744 | 0.366425 |

|                      |                           |          |          |         |          |
|----------------------|---------------------------|----------|----------|---------|----------|
| <i>Immt</i>          | chr6:71831330-71875257    | 35.6984  | 34.1616  | -0.0635 | 0.220678 |
| <i>Nsmce1</i>        | chr7:125467639-125491596  | 34.1113  | 31.7355  | -0.1042 | 0.483034 |
| <i>Zc3h12b</i>       | chrX:95711677-95932637    | 1.4695   | 1.3634   | -0.1081 | 0.351793 |
| <i>Tmem141</i>       | chr2:25620066-25622005    | 3.0735   | 2.7462   | -0.1624 | 0.260661 |
| <i>E130218I03Rik</i> | chr4:134243661-134245873  | 10.0772  | 10.5817  | 0.0705  | 0.630454 |
| <i>Hgs</i>           | chr11:120467634-120483984 | 13.5312  | 14.0388  | 0.0531  | 0.659069 |
| <i>Rpp25l</i>        | chr4:41712032-41713534    | 15.4377  | 14.1465  | -0.1260 | 0.465434 |
| <i>Plk3</i>          | chr4:117128654-117133963  | 4.8362   | 4.4645   | -0.1154 | 0.385783 |
| <i>Dbnl</i>          | chr11:5788487-5800962     | 79.2617  | 81.7027  | 0.0438  | 0.697215 |
| <i>Syne2</i>         | chr12:75818133-76110926   | 3.0187   | 2.8741   | -0.0708 | 0.255563 |
| <i>Lgals8</i>        | chr13:12439414-12464944   | 29.5788  | 30.1777  | 0.0289  | 0.635509 |
| <i>Trbv5</i>         | chr6:41062358-41062803    | 41.5787  | 44.0700  | 0.0840  | 0.672790 |
| <i>Kbtbd8</i>        | chr6:95117239-95129718    | 7.3075   | 6.8660   | -0.0899 | 0.391396 |
| <i>Creld1</i>        | chr6:113483296-113493338  | 1.5486   | 1.4009   | -0.1447 | 0.425350 |
| <i>Zfp422</i>        | chr6:116624015-116628999  | 7.7102   | 7.2451   | -0.0898 | 0.327522 |
| <i>Wdr11</i>         | chr7:129591862-129635738  | 6.8908   | 7.0370   | 0.0303  | 0.635341 |
| <i>Arl2bp</i>        | chr8:94666754-94674417    | 65.0587  | 62.2509  | -0.0636 | 0.196977 |
| <i>Wwp2</i>          | chr8:107436397-107558594  | 17.7343  | 16.7799  | -0.0798 | 0.410364 |
| <i>Pdzd2</i>         | chr15:12357053-12592556   | 0.2774   | 0.3087   | 0.1543  | 0.619632 |
| <i>Haus4</i>         | chr14:54541784-54554361   | 19.5487  | 18.4719  | -0.0817 | 0.256570 |
| <i>Tfb1m</i>         | chr17:3519262-3557713     | 10.1546  | 9.4265   | -0.1073 | 0.299581 |
| <i>Mtprs34</i>       | chr17:24895115-24897502   | 23.8855  | 22.3262  | -0.0974 | 0.468939 |
| <i>Itpr3os</i>       | chr17:27099657-27101440   | 11.5298  | 10.5772  | -0.1244 | 0.410429 |
| <i>Ccdc116</i>       | chr16:17139063-17147229   | 1.2051   | 1.0644   | -0.1791 | 0.522598 |
| <i>Vps13a</i>        | chr19:16616762-16780822   | 54.9452  | 52.0239  | -0.0788 | 0.453459 |
| <i>9430016H08Rik</i> | chr1:57406327-57417953    | 4.3607   | 4.0516   | -0.1061 | 0.372502 |
| <i>Ufc1</i>          | chr1:171288562-171295024  | 21.9522  | 20.4179  | -0.1045 | 0.479146 |
| <i>Secisbp2l</i>     | chr2:125736985-125782870  | 14.8238  | 15.0760  | 0.0243  | 0.587902 |
| <i>Gm10254</i>       | chr3:54810563-54811250    | 1.4787   | 1.1732   | -0.3339 | 0.467560 |
| <i>Gne</i>           | chr4:44034074-44084177    | 9.0277   | 9.2627   | 0.0371  | 0.587908 |
| <i>NA</i>            | chr4:136343974-136345981  | 7.1160   | 6.5821   | -0.1125 | 0.463075 |
| <i>Gm25939</i>       | chr1:72255007-72255198    | 22.8156  | 17.4349  | -0.3880 | 0.546994 |
| <i>Golga5</i>        | chr12:102469133-102497902 | 35.2798  | 35.8188  | 0.0219  | 0.554499 |
| <i>Rpl39</i>         | chrX:37082519-37085402    | 185.9543 | 163.5056 | -0.1856 | 0.529982 |
| <i>Mtus2</i>         | chr5:147957319-148316065  | 0.1077   | 0.2484   | 1.2054  | 0.363238 |
| <i>Kcnp4</i>         | chr5:48389501-49524904    | 0.3765   | 0.4317   | 0.1974  | 0.401444 |
| <i>Ap1g1</i>         | chr8:109778553-109861358  | 19.3565  | 19.7779  | 0.0311  | 0.643290 |
| <i>Nipsnap1</i>      | chr11:4873950-4894200     | 10.6992  | 11.0788  | 0.0503  | 0.564859 |
| <i>Gm11970</i>       | chr11:6446217-6446537     | 6.8538   | 7.9238   | 0.2093  | 0.583717 |
| <i>Gm11769</i>       | chr11:120150561-120152341 | 3.0555   | 2.7186   | -0.1686 | 0.511397 |
| <i>Hip1r</i>         | chr5:123973627-124003211  | 22.5165  | 21.2387  | -0.0843 | 0.471792 |
| <i>Diap2</i>         | chrX:129749741-130465834  | 4.4769   | 4.6812   | 0.0644  | 0.705850 |
| <i>Taok2</i>         | chr7:126865677-126884703  | 13.6266  | 13.8670  | 0.0252  | 0.633627 |
| <i>Gipc1</i>         | chr8:83652677-83664788    | 13.5701  | 12.6134  | -0.1055 | 0.476608 |
| <i>Gm23969</i>       | chr2:26911260-26911334    | 13.1994  | 15.8829  | 0.2670  | 0.590708 |
| <i>Atxn2</i>         | chr5:121711336-121816493  | 5.0258   | 5.2492   | 0.0628  | 0.682651 |
| <i>Srpk1</i>         | chr17:28587647-28622521   | 49.4194  | 50.2022  | 0.0227  | 0.635776 |
| <i>Tmem14a</i>       | chr1:21218574-21230167    | 1.4671   | 1.6564   | 0.1751  | 0.586514 |
| <i>Helz2</i>         | chr2:181227614-181242027  | 23.1749  | 24.0352  | 0.0526  | 0.735372 |
| <i>Paqr7</i>         | chr4:134496696-134510235  | 17.2317  | 16.3221  | -0.0782 | 0.371634 |
| <i>Snord104</i>      | chr11:106500992-106501062 | 94.6634  | 84.2835  | -0.1676 | 0.534493 |
| <i>Atg10</i>         | chr13:90935348-91223987   | 4.7279   | 4.9832   | 0.0759  | 0.395494 |
| <i>Tlhc1</i>         | chr8:119760586-119778416  | 5.2379   | 5.4684   | 0.0621  | 0.553772 |
| <i>Myo6</i>          | chr9:80165030-80311729    | 1.5158   | 1.6432   | 0.1164  | 0.693077 |
| <i>2610318N02Rik</i> | chr16:17113398-17125106   | 1.3694   | 1.5684   | 0.1958  | 0.588082 |
| <i>Gm15711</i>       | chr16:43312593-43313128   | 2.8066   | 3.2256   | 0.2007  | 0.485495 |
| <i>Smarcb1</i>       | chr10:75896768-75921617   | 7.3528   | 6.9079   | -0.0900 | 0.484236 |
| <i>6530409C15Rik</i> | chr6:28215554-28260862    | 7.4466   | 7.8075   | 0.0683  | 0.598529 |
| <i>Aph1b</i>         | chr9:66775201-66795490    | 0.1599   | 0.1950   | 0.2859  | 0.460891 |
| <i>Ehd1</i>          | chr19:6276724-6300096     | 24.4659  | 22.9746  | -0.0907 | 0.505470 |
| <i>Marveld1</i>      | chr19:42147399-42151695   | 10.6792  | 10.1006  | -0.0804 | 0.214475 |
| <i>Stmn1</i>         | chr4:134468319-134473843  | 1.3269   | 1.4846   | 0.1620  | 0.541555 |
| <i>Gm26571</i>       | chr12:83950689-83951355   | 10.4427  | 9.4083   | -0.1505 | 0.506947 |
| <i>Zfp712</i>        | chr13:67038593-67061170   | 7.4642   | 6.9764   | -0.0975 | 0.445120 |
| <i>Ankib1</i>        | chr5:3689999-3803109      | 37.0552  | 37.7582  | 0.0271  | 0.596072 |
| <i>Znhit1</i>        | chr5:136982163-136988021  | 7.9161   | 8.4957   | 0.1019  | 0.680219 |
| <i>Gm15545</i>       | chr7:44986899-44994597    | 8.9946   | 9.3096   | 0.0497  | 0.460416 |
| <i>Phrf1</i>         | chr7:141228783-141262750  | 21.1748  | 20.0659  | -0.0776 | 0.454805 |
| <i>Arrdc2</i>        | chr8:70835154-70839720    | 8.0421   | 8.4263   | 0.0673  | 0.662398 |
| <i>Exosc7</i>        | chr9:123113214-123136129  | 19.6989  | 18.6814  | -0.0765 | 0.146534 |
| <i>Vav3</i>          | chr3:109340652-109685698  | 5.1755   | 5.3369   | 0.0443  | 0.522194 |

|                      |                           |          |          |         |          |
|----------------------|---------------------------|----------|----------|---------|----------|
| <i>Rab32</i>         | chr10:10545010-10558233   | 3.1144   | 3.2965   | 0.0820  | 0.502159 |
| <i>Gm26577</i>       | chr10:21145093-21154374   | 4.9173   | 5.1814   | 0.0755  | 0.645418 |
| <i>Dse</i>           | chr10:34151393-34207551   | 15.2141  | 14.4020  | -0.0791 | 0.385121 |
| <i>Ccdc162</i>       | chr10:41538845-41709300   | 0.8915   | 0.8020   | -0.1525 | 0.448911 |
| <i>Slc29a3</i>       | chr10:60712071-60752794   | 2.1760   | 2.3335   | 0.1008  | 0.698301 |
| <i>Ado</i>           | chr10:67544511-67548955   | 18.2050  | 17.4363  | -0.0622 | 0.020148 |
| <i>Pcnt</i>          | chr10:76351253-76442912   | 24.7448  | 23.5805  | -0.0695 | 0.419291 |
| <i>Ppap2c</i>        | chr10:79526429-79533787   | 0.3953   | 0.4795   | 0.2789  | 0.413979 |
| <i>Matk</i>          | chr10:81252934-81263365   | 10.3135  | 9.5940   | -0.1043 | 0.539873 |
| <i>4930404N11Rik</i> | chr10:81363066-81365816   | 3.0381   | 2.7577   | -0.1397 | 0.391217 |
| <i>Arl1</i>          | chr10:88730857-88744094   | 14.2090  | 13.3653  | -0.0883 | 0.359784 |
| <i>Ikbip</i>         | chr10:91082939-91102607   | 0.3313   | 0.3743   | 0.1762  | 0.458588 |
| <i>Cep83</i>         | chr10:94688789-94790336   | 17.1969  | 17.7300  | 0.0440  | 0.641812 |
| <i>Cnot2</i>         | chr10:116485160-116581511 | 53.5882  | 55.0001  | 0.0375  | 0.677946 |
| <i>Zc3h10</i>        | chr10:128541962-128547774 | 9.7707   | 10.0195  | 0.0363  | 0.585919 |
| <i>Tbc1d10a</i>      | chr11:4186788-4215505     | 12.8103  | 12.0959  | -0.0828 | 0.355241 |
| <i>Gm11960</i>       | chr11:4561779-4564637     | 0.6500   | 0.5590   | -0.2176 | 0.405651 |
| <i>Znrf3</i>         | chr11:5276323-5444847     | 7.2285   | 6.8819   | -0.0709 | 0.311523 |
| <i>Gm12042</i>       | chr11:21295559-21295860   | 2.5250   | 3.1109   | 0.3011  | 0.493207 |
| <i>Chac2</i>         | chr11:30976706-30986350   | 3.2314   | 3.5330   | 0.1287  | 0.606608 |
| <i>Cyfp2</i>         | chr11:46193849-46312859   | 34.0744  | 35.4420  | 0.0568  | 0.728064 |
| <i>Hnrnpab</i>       | chr11:51600099-51606847   | 120.6894 | 124.5506 | 0.0454  | 0.702738 |
| <i>Slc22a5</i>       | chr11:53864541-53891660   | 5.5100   | 5.1036   | -0.1105 | 0.477203 |
| <i>Gm12227</i>       | chr11:54728676-54734323   | 7.9922   | 8.6762   | 0.1185  | 0.529102 |
| <i>Mfap4</i>         | chr11:61485430-61488900   | 0.4393   | 0.3533   | -0.3144 | 0.287927 |
| <i>Tvp23b</i>        | chr11:62879454-62916780   | 10.6637  | 10.0029  | -0.0923 | 0.367813 |
| <i>Ctdnep1</i>       | chr11:69981155-69990601   | 12.7558  | 12.0151  | -0.0863 | 0.357154 |
| <i>Gsg2</i>          | chr11:73135484-73138294   | 12.7020  | 11.8903  | -0.0953 | 0.501796 |
| <i>Emc6</i>          | chr11:73175518-73177037   | 30.1445  | 27.8836  | -0.1125 | 0.549795 |
| <i>Slfn2</i>         | chr11:83065111-83070678   | 222.7463 | 226.4556 | 0.0238  | 0.664653 |
| <i>Tada2a</i>        | chr11:84078919-84129600   | 3.1285   | 2.8843   | -0.1172 | 0.349949 |
| <i>Srsf1</i>         | chr11:88047372-88053755   | 137.2911 | 131.5663 | -0.0614 | 0.242154 |
| <i>Acsf2</i>         | chr11:94557101-94601871   | 2.4034   | 2.1929   | -0.1322 | 0.480016 |
| <i>D030028A08Rik</i> | chr11:96916269-96965060   | 6.8795   | 6.4960   | -0.0827 | 0.422291 |
| <i>Gpr179</i>        | chr11:97332108-97352077   | 0.1073   | 0.0863   | -0.3144 | 0.535430 |
| <i>Gm12356</i>       | chr11:98682920-98683415   | 5.3865   | 6.1026   | 0.1801  | 0.492407 |
| <i>Naglu</i>         | chr11:101070011-101077672 | 8.4058   | 8.7639   | 0.0602  | 0.696080 |
| <i>Tmub2</i>         | chr11:102284930-102289237 | 17.9984  | 18.5080  | 0.0403  | 0.664963 |
| <i>Gm17541</i>       | chr12:4689401-4689926     | 1.9949   | 2.3649   | 0.2454  | 0.572170 |
| <i>Rock2</i>         | chr12:16894977-16988274   | 19.9655  | 20.5058  | 0.0385  | 0.684532 |
| <i>Pik3cg</i>        | chr12:32173472-32208659   | 13.7324  | 14.0991  | 0.0380  | 0.720852 |
| <i>Gm17024</i>       | chr12:40209486-40211073   | 5.5092   | 4.9246   | -0.1618 | 0.341458 |
| <i>Cfl2</i>          | chr12:54858816-54862877   | 14.3779  | 13.4403  | -0.0973 | 0.496498 |
| <i>Zc2hc1c</i>       | chr12:85288590-85299358   | 0.4450   | 0.4972   | 0.1599  | 0.498537 |
| <i>Ppp1r13b</i>      | chr12:111828457-111908055 | 12.9492  | 12.3277  | -0.0710 | 0.330051 |
| <i>Mplkip</i>        | chr13:17695412-17699105   | 17.0618  | 17.6291  | 0.0472  | 0.663308 |
| <i>Hist1h2bm</i>     | chr13:21722097-21722478   | 16.4280  | 17.9055  | 0.1242  | 0.707835 |
| <i>Serpinb1a</i>     | chr13:32842091-32851185   | 0.8269   | 0.9342   | 0.1760  | 0.413370 |
| <i>Klf13a</i>        | chr13:46749086-46929718   | 0.6297   | 0.6972   | 0.1468  | 0.664204 |
| <i>Cam1</i>          | chr13:55623004-55632411   | 16.6173  | 17.0696  | 0.0387  | 0.556236 |
| <i>Mir3074-1</i>     | chr13:63301179-63301296   | 14.6357  | 16.6757  | 0.1883  | 0.561053 |
| <i>Cdc14b</i>        | chr13:64192544-64274973   | 7.8303   | 7.4062   | -0.0803 | 0.438905 |
| <i>Gm10767</i>       | chr13:66904913-66909236   | 1.9158   | 2.0874   | 0.1238  | 0.509799 |
| <i>Smn1</i>          | chr13:100124851-100137690 | 4.9113   | 5.2479   | 0.0956  | 0.671040 |
| <i>Rbm48</i>         | chr5:3583977-3596585      | 13.5963  | 14.0828  | 0.0507  | 0.634707 |
| <i>Gtpbp10</i>       | chr5:5537453-5559538      | 2.3687   | 2.4942   | 0.0745  | 0.662220 |
| <i>Lias</i>          | chr5:65391496-65410693    | 7.5371   | 7.7668   | 0.0433  | 0.619712 |
| <i>Gm15981</i>       | chr5:74316565-74317029    | 1.5693   | 1.9136   | 0.2862  | 0.570156 |
| <i>Paics</i>         | chr5:76951306-76967509    | 47.6420  | 48.8711  | 0.0367  | 0.653388 |
| <i>1700028K03Rik</i> | chr5:107508943-107551549  | 1.1512   | 1.0414   | -0.1445 | 0.561494 |
| <i>Pxmp2</i>         | chr5:110274281-110286186  | 1.1151   | 1.2802   | 0.1992  | 0.403609 |
| <i>Rpl6</i>          | chr5:121204480-121209241  | 53.1908  | 55.5976  | 0.0638  | 0.700820 |
| <i>Tpst1</i>         | chr5:130073325-130135729  | 2.5203   | 2.6777   | 0.0874  | 0.561165 |
| <i>Ift22</i>         | chr5:136908149-136913244  | 2.2459   | 2.5080   | 0.1593  | 0.465624 |
| <i>Mospd3</i>        | chr5:137596644-137601058  | 2.1412   | 2.3744   | 0.1492  | 0.620571 |
| <i>Rsph10b</i>       | chr5:143933034-143985719  | 1.1120   | 0.9975   | -0.1567 | 0.174095 |
| <i>Trrap</i>         | chr5:144768091-144859778  | 16.4933  | 15.4049  | -0.0985 | 0.571850 |
| <i>Lancl2</i>        | chr6:57702600-57739438    | 2.1151   | 2.2369   | 0.0808  | 0.452757 |
| <i>Nap1l5</i>        | chr6:58905233-58907126    | 1.3528   | 1.5495   | 0.1958  | 0.644651 |
| <i>Mrpl35</i>        | chr6:71813002-71823810    | 7.4008   | 7.6743   | 0.0524  | 0.638769 |
| <i>Elmod3</i>        | chr6:72565921-72598413    | 3.3289   | 3.0745   | -0.1147 | 0.429252 |

|                      |                          |          |          |         |          |
|----------------------|--------------------------|----------|----------|---------|----------|
| <i>Pole4</i>         | chr6:82618991-82705365   | 17.8107  | 16.5853  | -0.1028 | 0.519839 |
| <i>Dusp11</i>        | chr6:85942267-85961667   | 29.4364  | 29.8819  | 0.0217  | 0.568490 |
| <i>Uba3</i>          | chr6:97183669-97205642   | 26.3279  | 27.0944  | 0.0414  | 0.655323 |
| <i>Eij4e3</i>        | chr6:99625134-99666771   | 6.7199   | 6.2398   | -0.1069 | 0.478983 |
| <i>Foxj2</i>         | chr6:122819913-122845366 | 6.6147   | 6.2002   | -0.0934 | 0.510383 |
| <i>Klri2</i>         | chr6:129729040-129740484 | 0.1649   | 0.2168   | 0.3950  | 0.605540 |
| <i>Fkrp</i>          | chr7:16809269-16816732   | 12.4735  | 11.7574  | -0.0853 | 0.364336 |
| <i>Ppp5c</i>         | chr7:17004639-17027924   | 20.6059  | 21.2057  | 0.0414  | 0.689181 |
| <i>4732471J01Rik</i> | chr7:25384804-25385573   | 7.8290   | 7.0324   | -0.1548 | 0.230677 |
| <i>Tmem91</i>        | chr7:25669138-25675166   | 2.0124   | 1.8310   | -0.1363 | 0.517893 |
| <i>Rinl</i>          | chr7:28788968-28798963   | 77.5164  | 74.2737  | -0.0617 | 0.280094 |
| <i>Zfp84</i>         | chr7:29768551-29779821   | 19.6313  | 20.1626  | 0.0385  | 0.610057 |
| <i>Zfp382</i>        | chr7:30121941-30134665   | 6.8340   | 7.1220   | 0.0596  | 0.542873 |
| <i>Pepd</i>          | chr7:34912378-35044710   | 17.7011  | 16.6432  | -0.0889 | 0.450394 |
| <i>AW146154</i>      | chr7:41478879-41499890   | 4.8456   | 5.0630   | 0.0633  | 0.651349 |
| <i>Emc10</i>         | chr7:44489936-44496529   | 24.3772  | 25.5033  | 0.0652  | 0.716588 |
| <i>Prr12</i>         | chr7:45027706-45052881   | 2.1732   | 2.3680   | 0.1239  | 0.712016 |
| <i>0610005C13Rik</i> | chr7:45567794-45575327   | 0.2157   | 0.2557   | 0.2452  | 0.158709 |
| <i>Fam103a1</i>      | chr7:81762924-81769491   | 3.3281   | 3.5857   | 0.1076  | 0.583114 |
| <i>Gm16638</i>       | chr7:83597047-83631842   | 1.9973   | 1.7901   | -0.1580 | 0.265352 |
| <i>Prkrir</i>        | chr7:98703102-98718062   | 40.3037  | 38.4825  | -0.0667 | 0.318930 |
| <i>Lamtor1</i>       | chr7:101905836-101911901 | 25.8689  | 23.9525  | -0.1110 | 0.519073 |
| <i>Snora23</i>       | chr7:110046363-110046547 | 148.1306 | 167.3217 | 0.1758  | 0.647329 |
| <i>Lyrm1</i>         | chr7:119895860-119916756 | 2.8148   | 3.0803   | 0.1301  | 0.635168 |
| <i>Aldoa</i>         | chr7:126795233-126800751 | 98.4017  | 101.5435 | 0.0453  | 0.699279 |
| <i>Hirip3</i>        | chr7:126861971-126865377 | 5.2156   | 4.8852   | -0.0944 | 0.226827 |
| <i>Mvp</i>           | chr7:126986859-127014621 | 14.7063  | 15.1567  | 0.0435  | 0.667941 |
| <i>Cd2bp2</i>        | chr7:127191659-127196000 | 37.4393  | 38.0291  | 0.0225  | 0.609481 |
| <i>Fbrs</i>          | chr7:127485220-127491513 | 12.1008  | 11.2512  | -0.1050 | 0.552007 |
| <i>Armc5</i>         | chr7:128237356-128245100 | 6.1863   | 6.4263   | 0.0549  | 0.635991 |
| <i>Tssc4</i>         | chr7:143069248-143071093 | 9.1692   | 8.4981   | -0.1097 | 0.423959 |
| <i>Insr</i>          | chr8:3150921-3279617     | 6.9331   | 6.6086   | -0.0692 | 0.340583 |
| <i>E230013L22Rik</i> | chr8:11477928-11480241   | 1.2299   | 1.0757   | -0.1932 | 0.259459 |
| <i>Cdc16</i>         | chr8:13757675-13781938   | 24.1604  | 23.0332  | -0.0689 | 0.174579 |
| <i>Lonrf1</i>        | chr8:36216063-36249516   | 0.3893   | 0.3246   | -0.2620 | 0.440665 |
| <i>Cdkn2aip</i>      | chr8:47709343-47713931   | 16.0564  | 16.5321  | 0.0421  | 0.621160 |
| <i>Zfp963</i>        | chr8:69741638-69749970   | 5.9617   | 6.1918   | 0.0546  | 0.340757 |
| <i>Snora68</i>       | chr8:70895758-70895889   | 45.3679  | 39.5045  | -0.1997 | 0.580774 |
| <i>Tpm4</i>          | chr8:72134974-72153142   | 126.1641 | 118.9700 | -0.0847 | 0.473497 |
| <i>Ier2</i>          | chr8:84661330-84662852   | 38.1295  | 39.8638  | 0.0642  | 0.708772 |
| <i>Fto</i>           | chr8:91313531-91668439   | 3.8448   | 3.6035   | -0.0935 | 0.533991 |
| <i>Psmb10</i>        | chr8:105935727-105938392 | 111.5947 | 104.8300 | -0.0902 | 0.485755 |
| <i>Zfp90</i>         | chr8:106415338-106425889 | 5.4437   | 5.0912   | -0.0966 | 0.271824 |
| <i>Cirh1a</i>        | chr8:106893639-106923093 | 28.2101  | 26.9827  | -0.0642 | 0.098475 |
| <i>Zfp821</i>        | chr8:109705548-109724932 | 2.0198   | 1.8133   | -0.1556 | 0.343299 |
| <i>Atmin</i>         | chr8:116943392-116960445 | 7.3121   | 6.9181   | -0.0799 | 0.354030 |
| <i>Gcsh</i>          | chr8:116981809-116993537 | 7.0368   | 6.4932   | -0.1160 | 0.372402 |
| <i>A130014A01Rik</i> | chr8:120101581-120103904 | 3.4479   | 3.1294   | -0.1399 | 0.506145 |
| <i>Gm22643</i>       | chr9:13621225-13621326   | 19.2937  | 21.6190  | 0.1642  | 0.475568 |
| <i>4931406C07Rik</i> | chr9:15283336-15306448   | 1.3205   | 1.4355   | 0.1205  | 0.547481 |
| <i>St3gal4</i>       | chr9:35046578-35116810   | 18.8087  | 17.8825  | -0.0729 | 0.205182 |
| <i>Mfrp</i>          | chr9:44101737-44109187   | 0.2731   | 0.3173   | 0.2165  | 0.511306 |
| <i>Ccdc84</i>        | chr9:44410159-44418003   | 21.7596  | 20.5174  | -0.0848 | 0.341860 |
| <i>Peak1os</i>       | chr9:56257889-56267780   | 1.5741   | 1.7993   | 0.1929  | 0.611683 |
| <i>Stoml1</i>        | chr9:58253163-58262523   | 15.6827  | 16.2351  | 0.0499  | 0.683610 |
| <i>Senp8</i>         | chr9:59734258-59750649   | 1.7836   | 1.8863   | 0.0808  | 0.387457 |
| <i>Usp3</i>          | chr9:66514636-66593142   | 39.1645  | 40.0444  | 0.0321  | 0.654602 |
| <i>Tcf12</i>         | chr9:71844251-72111819   | 51.6671  | 49.6248  | -0.0582 | 0.085409 |
| <i>Arpp19</i>        | chr9:75037613-75060313   | 12.6582  | 11.8674  | -0.0931 | 0.493072 |
| <i>Gm16185</i>       | chr9:97085325-97088610   | 10.8822  | 11.3181  | 0.0567  | 0.710965 |
| <i>Nmnat3</i>        | chr9:98287434-98420527   | 2.7279   | 2.8253   | 0.0506  | 0.399532 |
| <i>Gnai2</i>         | chr9:107614137-107635342 | 159.6514 | 163.3870 | 0.0334  | 0.681197 |
| <i>Rnf123</i>        | chr9:108051533-108083346 | 22.3612  | 20.9958  | -0.0909 | 0.524431 |
| <i>Nckipsd</i>       | chr9:108808379-108818366 | 2.9714   | 2.7446   | -0.1146 | 0.218209 |
| <i>Setd2</i>         | chr9:110532596-110618633 | 25.7025  | 26.4472  | 0.0412  | 0.723516 |
| <i>Gms50</i>         | chr9:110914738-110916861 | 5.6939   | 5.0363   | -0.1771 | 0.387350 |
| <i>Higd1a</i>        | chr9:121848559-121858000 | 8.3839   | 7.8242   | -0.0997 | 0.305258 |
| <i>Lztf1</i>         | chr9:123694415-123717625 | 4.7036   | 4.4319   | -0.0858 | 0.411409 |
| <i>Upf3b</i>         | chrX:37091677-37110322   | 9.7772   | 10.0522  | 0.0400  | 0.585881 |
| <i>Mospd1</i>        | chrX:53344597-53370502   | 8.0294   | 7.4163   | -0.1146 | 0.515853 |
| <i>Cetn2</i>         | chrX:72913531-72918411   | 28.6091  | 29.7187  | 0.0549  | 0.685267 |

|                      |                           |           |           |         |          |
|----------------------|---------------------------|-----------|-----------|---------|----------|
| <i>Rps24-ps3</i>     | chrX:79195046-79195448    | 130.8945  | 148.5323  | 0.1824  | 0.559852 |
| <i>Snx12</i>         | chrX:101097785-101222563  | 10.6280   | 9.9809    | -0.0906 | 0.372139 |
| <i>Zmym3</i>         | chrX:101404383-101420849  | 6.0365    | 6.1703    | 0.0316  | 0.609836 |
| <i>Brwd3</i>         | chrX:108737015-108834372  | 4.5023    | 4.2574    | -0.0807 | 0.420162 |
| <i>Gm7823</i>        | chrX:133093939-133095562  | 2.6694    | 2.9192    | 0.1290  | 0.519145 |
| <i>Timm8a1</i>       | chrX:134537255-134541865  | 1.0685    | 0.9059    | -0.2381 | 0.296967 |
| <i>Klf8</i>          | chrX:153237465-153396132  | 0.7691    | 0.8463    | 0.1381  | 0.607808 |
| <i>Acot9</i>         | chrX:155262442-155297654  | 19.8641   | 18.5797   | -0.0964 | 0.492072 |
| <i>Tceanc</i>        | chrX:166499811-166518567  | 4.2072    | 4.3485    | 0.0477  | 0.517596 |
| <i>Zfp622</i>        | chr15:25984365-25998482   | 28.8352   | 29.7365   | 0.0444  | 0.675236 |
| <i>Gm15943</i>       | chr15:58214474-58324053   | 0.7322    | 0.6310    | -0.2147 | 0.516709 |
| <i>Asap1</i>         | chr15:64086856-64382919   | 8.2604    | 8.6207    | 0.0616  | 0.729152 |
| <i>Arc</i>           | chr15:74669082-74672570   | 1.0945    | 0.9230    | -0.2458 | 0.577696 |
| <i>Ly6k</i>          | chr15:74796873-74799986   | 2.2221    | 1.3973    | -0.6692 | 0.580494 |
| <i>Tigd5</i>         | chr15:75909759-75912148   | 1.3574    | 1.1906    | -0.1891 | 0.477267 |
| <i>lft27</i>         | chr15:78159464-78174108   | 12.2170   | 12.9023   | 0.0787  | 0.640708 |
| <i>Rps19bp1</i>      | chr15:80260613-80264306   | 10.9543   | 11.5447   | 0.0757  | 0.569680 |
| <i>Aco2</i>          | chr15:81872308-81915133   | 46.6794   | 44.6949   | -0.0627 | 0.232987 |
| <i>Fam118a</i>       | chr15:85037061-85062828   | 13.1510   | 13.4813   | 0.0358  | 0.471793 |
| <i>Gm26513</i>       | chr15:98093282-98095771   | 1.1290    | 1.2504    | 0.1474  | 0.535239 |
| <i>Ccnt1</i>         | chr15:98538688-98570923   | 20.6561   | 19.6570   | -0.0715 | 0.368703 |
| <i>Vdac2</i>         | chr14:21831268-21845879   | 31.9161   | 32.4936   | 0.0259  | 0.550968 |
| <i>4930431P03Rik</i> | chr14:44955216-44961307   | 1.1437    | 1.2454    | 0.1229  | 0.643555 |
| <i>Traj36</i>        | chr14:54182401-54182464   | 39.3172   | 33.0685   | -0.2497 | 0.608547 |
| <i>Traj15</i>        | chr14:54204421-54204481   | 68.1161   | 73.3559   | 0.1069  | 0.483228 |
| <i>C1qtnf9</i>       | chr14:60768133-60780869   | 0.4650    | 0.3650    | -0.3496 | 0.494841 |
| <i>Reep4</i>         | chr14:70545250-70548933   | 17.1761   | 16.0602   | -0.0969 | 0.509580 |
| <i>Mir17hg</i>       | chr14:115042878-115046727 | 18.9686   | 17.9106   | -0.0828 | 0.468031 |
| <i>Farp1</i>         | chr14:121035199-121283744 | 1.0246    | 1.1139    | 0.1206  | 0.653970 |
| <i>Stk24</i>         | chr14:121286342-121379334 | 59.1941   | 60.5011   | 0.0315  | 0.676290 |
| <i>Amdhd2</i>        | chr17:24155832-24163766   | 6.9639    | 7.2778    | 0.0636  | 0.660161 |
| <i>Bricd5</i>        | chr17:24473883-24475469   | 9.1628    | 8.4672    | -0.1139 | 0.387148 |
| <i>Ppard</i>         | chr17:28232753-28301469   | 1.2940    | 1.1729    | -0.1418 | 0.437042 |
| <i>Gm20109</i>       | chr17:28522380-28523148   | 1.3240    | 1.5607    | 0.2373  | 0.480962 |
| <i>Kctd20</i>        | chr17:28951949-28969549   | 17.9285   | 17.1549   | -0.0636 | 0.126482 |
| <i>Cd320</i>         | chr17:33843090-33849774   | 3.7641    | 3.4783    | -0.1139 | 0.411131 |
| <i>H2-K1</i>         | chr17:33996016-34000333   | 1109.1185 | 1056.4976 | -0.0701 | 0.367837 |
| <i>Atp6v1g2</i>      | chr17:35233659-35238767   | 3.0788    | 3.2710    | 0.0873  | 0.545690 |
| <i>Cchr1</i>         | chr17:35517099-35531015   | 1.1736    | 1.2585    | 0.1008  | 0.617308 |
| <i>Gabbr1</i>        | chr17:37045965-37075067   | 6.0360    | 6.2936    | 0.0603  | 0.711352 |
| <i>Cyp39a1</i>       | chr17:43667424-43751431   | 0.3018    | 0.3627    | 0.2648  | 0.564800 |
| <i>Gltscr1</i>       | chr17:46798115-46831413   | 4.6933    | 4.4016    | -0.0926 | 0.508232 |
| <i>Ubr2</i>          | chr17:46928291-47010532   | 26.3666   | 27.1986   | 0.0448  | 0.738014 |
| <i>Gm23657</i>       | chr17:46992622-46992916   | 4.2414    | 4.9557    | 0.2246  | 0.552445 |
| <i>Tfeb</i>          | chr17:47737029-47792419   | 2.5405    | 2.6732    | 0.0735  | 0.639899 |
| <i>Trem1</i>         | chr17:48300037-48312534   | 47.0330   | 44.7942   | -0.0704 | 0.330543 |
| <i>Tbc1d5</i>        | chr17:50733126-51179349   | 9.0605    | 9.3365    | 0.0433  | 0.694851 |
| <i>Snord53</i>       | chr17:71640878-71640956   | 41.4053   | 45.5258   | 0.1369  | 0.548127 |
| <i>Srl</i>           | chr16:4480215-4541816     | 0.1932    | 0.1575    | -0.2952 | 0.386863 |
| <i>Nagpa</i>         | chr16:5195288-5204012     | 14.3830   | 13.5296   | -0.0883 | 0.431664 |
| <i>Tssk2</i>         | chr16:17898636-17900023   | 0.8886    | 1.0164    | 0.1938  | 0.434897 |
| <i>Mir1306</i>       | chr16:18284238-18284317   | 45.2756   | 48.9808   | 0.1135  | 0.196821 |
| <i>Dnajb11</i>       | chr16:22857844-22879634   | 31.1612   | 29.6177   | -0.0733 | 0.362685 |
| <i>1700007L15Rik</i> | chr16:33379854-33380727   | 5.8985    | 6.3375    | 0.1036  | 0.497986 |
| <i>Gtpbp8</i>        | chr16:44736767-44746363   | 13.3210   | 12.6065   | -0.0795 | 0.381016 |
| <i>Nrip1</i>         | chr16:76287399-76373827   | 10.6899   | 10.9831   | 0.0390  | 0.695311 |
| <i>1110004E09Rik</i> | chr16:90925808-90934927   | 9.4926    | 10.1259   | 0.0932  | 0.652721 |
| <i>Cnih2</i>         | chr19:5092870-5098418     | 2.0815    | 1.8126    | -0.1996 | 0.437163 |
| <i>Sf3b2</i>         | chr19:5273922-5295455     | 117.8185  | 120.5435  | 0.0330  | 0.684727 |
| <i>Fosl1</i>         | chr19:5447702-5455945     | 1.5495    | 1.3617    | -0.1864 | 0.309694 |
| <i>Gm14965</i>       | chr19:6409399-6418606     | 6.2374    | 6.6936    | 0.1018  | 0.626929 |
| <i>Bscl2</i>         | chr19:8837466-8848683     | 9.2711    | 9.5151    | 0.0375  | 0.650088 |
| <i>Tut1</i>          | chr19:8953849-8966207     | 26.3502   | 24.8235   | -0.0861 | 0.452904 |
| <i>Tmem216</i>       | chr19:10533864-10556238   | 7.6747    | 7.1793    | -0.0963 | 0.290290 |
| <i>Ms4a6d</i>        | chr19:11586603-11604849   | 4.2811    | 4.6586    | 0.1219  | 0.713587 |
| <i>A330040F15Rik</i> | chr19:12585867-12596566   | 2.4295    | 2.1205    | -0.1963 | 0.414739 |
| <i>Abhd17b</i>       | chr19:21653308-21685637   | 13.8834   | 13.1972   | -0.0731 | 0.045467 |
| <i>D19Bwg1357e</i>   | chr19:27388701-27429820   | 31.5516   | 32.4176   | 0.0391  | 0.660174 |
| <i>Acta2</i>         | chr19:34241089-34255336   | 1.1188    | 1.2428    | 0.1517  | 0.343036 |
| <i>Lipa</i>          | chr19:34492317-34527474   | 41.8492   | 39.8131   | -0.0720 | 0.364396 |
| <i>Lcor</i>          | chr19:41482644-41562246   | 9.1872    | 9.5340    | 0.0535  | 0.702812 |

|                      |                          |          |          |         |          |
|----------------------|--------------------------|----------|----------|---------|----------|
| <i>Obfc1</i>         | chr19:47501032-47537507  | 10.4855  | 10.7286  | 0.0331  | 0.595531 |
| <i>Add3</i>          | chr19:53140444-53247399  | 142.1908 | 145.1973 | 0.0302  | 0.656823 |
| <i>Mxi1</i>          | chr19:53310505-53375810  | 4.1841   | 4.3879   | 0.0686  | 0.639306 |
| <i>Smc3</i>          | chr19:53600397-53645833  | 43.8407  | 44.9634  | 0.0365  | 0.678915 |
| <i>Fam160b1</i>      | chr19:57361008-57389594  | 20.4979  | 19.5570  | -0.0678 | 0.329250 |
| <i>Gm26580</i>       | chr1:21959841-21962530   | 1.8232   | 1.6017   | -0.1869 | 0.527592 |
| <i>Gm15455</i>       | chr1:33835898-33838914   | 0.4031   | 0.3392   | -0.2487 | 0.246079 |
| <i>Tgfbra1</i>       | chr1:43047268-43098622   | 7.4002   | 7.6687   | 0.0514  | 0.703982 |
| <i>Ormdl1</i>        | chr1:53297094-53310309   | 8.1439   | 7.6428   | -0.0916 | 0.453404 |
| <i>Gm24053</i>       | chr1:54769217-54769322   | 15.6225  | 17.8021  | 0.1884  | 0.478609 |
| <i>Tmem237</i>       | chr1:59100593-59120096   | 2.5255   | 2.2751   | -0.1506 | 0.434324 |
| <i>Psmc1</i>         | chr1:86064386-86139151   | 21.6671  | 22.0324  | 0.0241  | 0.565214 |
| <i>Cops7b</i>        | chr1:86582903-86606978   | 5.6840   | 5.2395   | -0.1175 | 0.518040 |
| <i>Sag</i>           | chr1:87803679-87845158   | 0.5367   | 0.5714   | 0.0904  | 0.285579 |
| <i>Gm15392</i>       | chr1:121489295-121493203 | 1.9488   | 2.2212   | 0.1887  | 0.532402 |
| <i>B4galt3</i>       | chr1:171270327-171276896 | 6.6736   | 6.8285   | 0.0331  | 0.523290 |
| <i>Kcnj10</i>        | chr1:172341209-172374085 | 0.1997   | 0.1664   | -0.2631 | 0.209524 |
| <i>Gm15423</i>       | chr1:176927998-176932711 | 0.6010   | 0.7200   | 0.2606  | 0.464050 |
| <i>Gm17036</i>       | chr18:6213912-6227324    | 31.6152  | 28.3838  | -0.1556 | 0.568315 |
| <i>Rnf125</i>        | chr18:20944624-20983848  | 50.9237  | 48.3786  | -0.0740 | 0.363362 |
| <i>Slc25a2</i>       | chr18:37637377-37638723  | 1.9752   | 1.7151   | -0.2036 | 0.376634 |
| <i>Gm10268</i>       | chr18:38244827-38245382  | 1.7970   | 2.1314   | 0.2462  | 0.547760 |
| <i>Gm4841</i>        | chr18:60268300-60273267  | 0.9884   | 1.1708   | 0.2443  | 0.703562 |
| <i>Rbm22</i>         | chr18:60560735-60572810  | 21.0665  | 21.4600  | 0.0267  | 0.596516 |
| <i>Fbxo38</i>        | chr18:62504068-62548743  | 40.1591  | 40.9085  | 0.0267  | 0.622549 |
| <i>Gnal</i>          | chr18:67088335-67226792  | 14.5110  | 13.7972  | -0.0728 | 0.321494 |
| <i>Frdm4a</i>        | chr2:4017716-4614043     | 0.9584   | 0.9020   | -0.0875 | 0.368124 |
| <i>Cdc123</i>        | chr2:5794293-5845164     | 13.9185  | 13.0879  | -0.0888 | 0.431139 |
| <i>Plxdc2</i>        | chr2:16356303-16755839   | 0.6589   | 0.7244   | 0.1366  | 0.675780 |
| <i>Gm22879</i>       | chr2:26912230-26912287   | 16.3437  | 12.8071  | -0.3518 | 0.537115 |
| <i>Ntng2</i>         | chr2:29194793-29253005   | 1.7544   | 1.9080   | 0.1211  | 0.645359 |
| <i>Dolpp1</i>        | chr2:30392253-30400529   | 6.7512   | 6.3199   | -0.0952 | 0.421982 |
| <i>D330023K18Rik</i> | chr2:31146456-31152291   | 2.6755   | 2.3857   | -0.1654 | 0.269061 |
| <i>Calcr1</i>        | chr2:84330625-84425411   | 23.3476  | 21.9348  | -0.0900 | 0.507721 |
| <i>Harbi1</i>        | chr2:91710851-91721545   | 3.0681   | 3.1944   | 0.0582  | 0.627905 |
| <i>Pex16</i>         | chr2:92374675-92381217   | 11.9426  | 12.3950  | 0.0536  | 0.649053 |
| <i>Nat10</i>         | chr2:103721255-103761270 | 14.4775  | 14.7999  | 0.0318  | 0.709572 |
| <i>Bloc1s6os</i>     | chr2:122733289-122738362 | 1.3586   | 1.1113   | -0.2898 | 0.273279 |
| <i>Gm14212</i>       | chr2:126864502-126865328 | 2.7909   | 2.4405   | -0.1935 | 0.385686 |
| <i>Sppl2a</i>        | chr2:126890390-126933235 | 17.8777  | 18.2497  | 0.0297  | 0.666019 |
| <i>Acss1</i>         | chr2:150618104-150668500 | 27.0399  | 25.7642  | -0.0697 | 0.353789 |
| <i>Rpn2</i>          | chr2:157279016-157326319 | 52.2352  | 49.9419  | -0.0648 | 0.339974 |
| <i>Arfgef2</i>       | chr2:166805587-166898052 | 10.8758  | 10.3556  | -0.0707 | 0.407963 |
| <i>Gm14337</i>       | chr2:173984481-173984691 | 26.7952  | 30.2184  | 0.1735  | 0.651744 |
| <i>Stx16</i>         | chr2:174076307-174099771 | 28.0801  | 26.6192  | -0.0771 | 0.466246 |
| <i>Snx16</i>         | chr3:10417818-10440124   | 2.2298   | 2.3708   | 0.0885  | 0.499008 |
| <i>Skil</i>          | chr3:31095057-31122577   | 23.5819  | 24.0421  | 0.0279  | 0.692651 |
| <i>4932438A13Rik</i> | chr3:36863105-37053033   | 28.6123  | 29.5504  | 0.0465  | 0.737276 |
| <i>Cog6</i>          | chr3:52982122-53017223   | 16.2095  | 15.3042  | -0.0829 | 0.404316 |
| <i>Mef2d</i>         | chr3:88142371-88172086   | 15.7236  | 16.3295  | 0.0545  | 0.721406 |
| <i>Thbs3</i>         | chr3:89215179-89226837   | 0.2910   | 0.3449   | 0.2450  | 0.612113 |
| <i>Krtcap2</i>       | chr3:89245965-89249722   | 30.6735  | 32.0810  | 0.0647  | 0.700236 |
| <i>Adam15</i>        | chr3:89339639-89349996   | 0.2062   | 0.2396   | 0.2165  | 0.474707 |
| <i>4933434E20Rik</i> | chr3:90051635-90063341   | 18.0755  | 17.1142  | -0.0788 | 0.395159 |
| <i>Sars</i>          | chr3:108424864-108445209 | 57.1923  | 58.7729  | 0.0393  | 0.698491 |
| <i>Sass6</i>         | chr3:116595007-116630984 | 4.0158   | 4.1796   | 0.0577  | 0.602402 |
| <i>Cisd2</i>         | chr3:135406411-135423925 | 17.1445  | 16.2954  | -0.0733 | 0.317023 |
| <i>4930539J05Rik</i> | chr3:135436208-135438665 | 4.0242   | 4.3419   | 0.1096  | 0.633495 |
| <i>2410004B18Rik</i> | chr3:145938013-145944829 | 13.7445  | 14.1346  | 0.0404  | 0.417539 |
| <i>Zfp292</i>        | chr4:34803112-34882960   | 51.8605  | 53.0807  | 0.0336  | 0.672163 |
| <i>Aptx</i>          | chr4:40682381-40703194   | 3.3705   | 3.4953   | 0.0525  | 0.600282 |
| <i>Fam219a</i>       | chr4:41517690-41569538   | 1.1759   | 1.2711   | 0.1123  | 0.540192 |
| <i>Fam214b</i>       | chr4:43032413-43046220   | 1.6759   | 1.5130   | -0.1475 | 0.555566 |
| <i>Alad</i>          | chr4:62509168-62519918   | 8.9263   | 8.2618   | -0.1116 | 0.498565 |
| <i>Megf9</i>         | chr4:70427064-70534995   | 0.9308   | 0.8482   | -0.1340 | 0.504446 |
| <i>Fam151a</i>       | chr4:106733888-106748292 | 0.9339   | 1.0718   | 0.1987  | 0.664658 |
| <i>Zfyve9</i>        | chr4:108637465-108780798 | 0.3865   | 0.4269   | 0.1434  | 0.531894 |
| <i>Nsun4</i>         | chr4:116032841-116053876 | 10.4341  | 9.7822   | -0.0931 | 0.453720 |
| <i>Gm12841</i>       | chr4:117883620-117885995 | 25.1020  | 26.4392  | 0.0749  | 0.518502 |
| <i>Lepre1</i>        | chr4:119232914-119248975 | 1.8783   | 1.9811   | 0.0768  | 0.448521 |
| <i>Sh3d21</i>        | chr4:126150601-126163491 | 0.8687   | 0.9577   | 0.1407  | 0.337450 |

|                      |                           |          |          |         |          |
|----------------------|---------------------------|----------|----------|---------|----------|
| <i>Ago3</i>          | chr4:126331703-126429556  | 4.4954   | 4.6711   | 0.0553  | 0.701767 |
| <i>Psemb2</i>        | chr4:126677629-126709714  | 68.0632  | 69.7858  | 0.0361  | 0.677970 |
| <i>Gm12941</i>       | chr4:127046382-127046602  | 6.0532   | 4.9907   | -0.2785 | 0.488888 |
| <i>Gm26516</i>       | chr4:130774816-130779246  | 3.0904   | 3.3340   | 0.1094  | 0.538197 |
| <i>Snora16a</i>      | chr4:132309464-132309600  | 27.9712  | 25.0589  | -0.1586 | 0.245889 |
| <i>Tmco4</i>         | chr4:138972887-139059171  | 16.9391  | 17.4191  | 0.0403  | 0.715506 |
| <i>Gm13091</i>       | chr4:150566868-150568544  | 19.6092  | 20.7316  | 0.0803  | 0.602777 |
| <i>Vamp3</i>         | chr4:151047299-151057963  | 12.8871  | 13.2595  | 0.0411  | 0.612253 |
| <i>Acot7</i>         | chr4:152178133-152271855  | 9.4175   | 9.9105   | 0.0736  | 0.681660 |
| <i>Gm16333</i>       | chr4:152410799-152411262  | 5.4746   | 6.3053   | 0.2038  | 0.625059 |
| <i>Cep104</i>        | chr4:153975193-154008732  | 3.8546   | 4.0237   | 0.0620  | 0.664479 |
| <i>Entpd3</i>        | chr9:120539817-120568318  | 0.1816   | 0.2199   | 0.2759  | 0.363258 |
| <i>Rps6kb1</i>       | chr11:86498870-86544805   | 18.5932  | 18.9634  | 0.0284  | 0.655185 |
| <i>Acap2</i>         | chr16:31092412-31201238   | 24.6758  | 23.4444  | -0.0739 | 0.416813 |
| <i>Pam</i>           | chr1:97795113-98095646    | 2.0949   | 2.2070   | 0.0752  | 0.691262 |
| <i>Ints10</i>        | chr8:68793928-68829410    | 6.8086   | 6.9679   | 0.0334  | 0.571331 |
| <i>Gm10638</i>       | chr8:86745698-86746603    | 2.9345   | 2.4892   | -0.2375 | 0.638252 |
| <i>Slc26a11</i>      | chr11:119355556-119381079 | 5.9985   | 6.2163   | 0.0515  | 0.585337 |
| <i>4930558J22Rik</i> | chr13:23756202-23757620   | 1.2379   | 1.0178   | -0.2824 | 0.556478 |
| <i>Gm10369</i>       | chr5:134676489-134680145  | 1.5038   | 1.2423   | -0.2756 | 0.572276 |
| <i>Vmac</i>          | chr17:56713931-56717699   | 6.8758   | 7.2766   | 0.0817  | 0.682544 |
| <i>Ndufv1</i>        | chr19:4007496-4012806     | 30.9818  | 29.1732  | -0.0868 | 0.479189 |
| <i>Glt8d2</i>        | chr10:82650432-82690650   | 1.1244   | 1.1930   | 0.0855  | 0.514606 |
| <i>Rnf19a</i>        | chr15:36239933-36283147   | 26.7169  | 27.2719  | 0.0297  | 0.647934 |
| <i>Slco3a1</i>       | chr7:74275418-74554780    | 10.8763  | 11.2015  | 0.0425  | 0.733774 |
| <i>Snape2</i>        | chr8:4253101-4256219      | 7.9282   | 8.3337   | 0.0720  | 0.616783 |
| <i>2610002M06Rik</i> | chrX:107782750-107816334  | 5.8776   | 6.0428   | 0.0400  | 0.577388 |
| <i>Sh2d3c</i>        | chr2:32721054-32755512    | 18.5638  | 17.6361  | -0.0740 | 0.439993 |
| <i>Snape1</i>        | chr12:73964529-73984820   | 12.9638  | 13.3811  | 0.0457  | 0.642567 |
| <i>Siva1</i>         | chr12:112644827-112649152 | 7.1474   | 7.6581   | 0.0996  | 0.602230 |
| <i>Daam2</i>         | chr17:49456021-49564337   | 0.6458   | 0.6987   | 0.1134  | 0.569856 |
| <i>Eij4a2</i>        | chr16:23107443-23114136   | 149.9629 | 141.8003 | -0.0807 | 0.493518 |
| <i>Gm6421</i>        | chr13:117358211-117358622 | 11.4532  | 12.2907  | 0.1018  | 0.491682 |
| <i>Ctrl</i>          | chr8:105931993-105933862  | 2.7444   | 2.4013   | -0.1927 | 0.416986 |
| <i>Ddx21</i>         | chr10:62580247-62602298   | 85.7447  | 86.9472  | 0.0201  | 0.650641 |
| <i>Btg1</i>          | chr10:96617000-96622813   | 130.8355 | 135.2433 | 0.0478  | 0.746640 |
| <i>Smcr8</i>         | chr11:60777524-60788287   | 18.2077  | 17.4848  | -0.0585 | 0.150516 |
| <i>Aldoc</i>         | chr11:78322967-78327781   | 0.4037   | 0.4615   | 0.1934  | 0.427896 |
| <i>G6pc3</i>         | chr11:102189619-102194081 | 5.8143   | 6.0825   | 0.0651  | 0.635290 |
| <i>Gm11652</i>       | chr11:105773517-105774784 | 0.8573   | 0.6938   | -0.3051 | 0.536991 |
| <i>Baiap2</i>        | chr11:119942762-120006782 | 4.1498   | 4.2932   | 0.0490  | 0.565823 |
| <i>Foxk2</i>         | chr11:121259989-121309896 | 9.2724   | 8.7954   | -0.0762 | 0.425314 |
| <i>Ncoa1</i>         | chr12:4247362-4477182     | 8.4116   | 8.5848   | 0.0294  | 0.652298 |
| <i>Ubxn2a</i>        | chr12:4879031-4907705     | 17.2665  | 17.6789  | 0.0341  | 0.606183 |
| <i>Churc1</i>        | chr12:76765537-76783180   | 7.3538   | 6.8357   | -0.1054 | 0.566024 |
| <i>Numb</i>          | chr12:83794033-83921934   | 12.1543  | 12.3967  | 0.0285  | 0.526543 |
| <i>Samd15</i>        | chr12:87199722-87213541   | 0.3322   | 0.3897   | 0.2302  | 0.393974 |
| <i>Gm26583</i>       | chr12:112946362-112950512 | 3.3520   | 3.0514   | -0.1355 | 0.587392 |
| <i>Net1</i>          | chr13:3882564-3918220     | 8.6584   | 8.9305   | 0.0446  | 0.602811 |
| <i>NA</i>            | chr13:21717627-21718115   | 3.4278   | 2.8868   | -0.2478 | 0.476943 |
| <i>Auh</i>           | chr13:52835118-52929681   | 5.2308   | 4.9525   | -0.0789 | 0.450524 |
| <i>Srd5a1</i>        | chr13:69573448-69611442   | 0.3239   | 0.2687   | -0.2695 | 0.297932 |
| <i>Iqgap2</i>        | chr13:95627176-95891922   | 45.5946  | 46.3926  | 0.0250  | 0.723915 |
| <i>Glmn</i>          | chr5:107548966-107597888  | 5.4459   | 5.7017   | 0.0662  | 0.660169 |
| <i>Sirt4</i>         | chr5:115478009-115484725  | 2.6337   | 2.4163   | -0.1243 | 0.287236 |
| <i>9530046B11Rik</i> | chr5:117115217-117118723  | 0.7743   | 0.6370   | -0.2816 | 0.365661 |
| <i>6330418K02Rik</i> | chr5:138264042-138266661  | 5.4442   | 4.9378   | -0.1409 | 0.527350 |
| <i>Mad111</i>        | chr5:140008688-140321552  | 12.0207  | 12.4426  | 0.0498  | 0.679037 |
| <i>Fry</i>           | chr5:150259929-150497752  | 5.6491   | 5.9508   | 0.0751  | 0.732433 |
| <i>Adck2</i>         | chr6:39573872-39596595    | 8.6433   | 8.1779   | -0.0798 | 0.408507 |
| <i>Bloc1s3</i>       | chr7:19505813-19508331    | 6.5787   | 6.8635   | 0.0611  | 0.580087 |
| <i>Zdhhc13</i>       | chr7:48789002-48827440    | 26.0036  | 24.6302  | -0.0783 | 0.397374 |
| <i>Gm7180</i>        | chr7:81222361-81222874    | 1.9432   | 2.3141   | 0.2520  | 0.592607 |
| <i>Seps2</i>         | chr7:127272560-127273919  | 23.9066  | 22.6431  | -0.0783 | 0.319026 |
| <i>Cln3</i>          | chr8:60910388-60983300    | 10.5483  | 10.0628  | -0.0680 | 0.420679 |
| <i>Gm27006</i>       | chr8:79705596-79706539    | 4.7051   | 4.1913   | -0.1668 | 0.463227 |
| <i>Orc6</i>          | chr8:85299631-85308278    | 11.7200  | 12.1977  | 0.0576  | 0.678934 |
| <i>Chek1</i>         | chr9:36708481-36727065    | 1.3070   | 1.3905   | 0.0894  | 0.609129 |
| <i>Pcsk7</i>         | chr9:45906568-45929692    | 18.4803  | 17.5888  | -0.0713 | 0.381828 |
| <i>NA</i>            | chr9:85781862-85782663    | 1.1058   | 0.9148   | -0.2736 | 0.171022 |
| <i>Uxt</i>           | chrX:20941721-20962017    | 4.9668   | 5.2364   | 0.0762  | 0.602673 |

|                      |                           |          |          |         |          |
|----------------------|---------------------------|----------|----------|---------|----------|
| <i>Cyp2d22</i>       | chr15:82370527-82380260   | 1.8348   | 1.6455   | -0.1572 | 0.530315 |
| <i>Gm10337</i>       | chr15:102503721-102503886 | 5.4254   | 4.4583   | -0.2832 | 0.242478 |
| <i>Gm10044</i>       | chr14:7744062-7791651     | 0.8130   | 0.9215   | 0.1808  | 0.629357 |
| <i>Phf7</i>          | chr14:31237695-31251218   | 10.2602  | 9.5477   | -0.1038 | 0.521057 |
| <i>Tep1</i>          | chr14:50824061-50870560   | 5.6015   | 5.2354   | -0.0975 | 0.567001 |
| <i>Wdfy2</i>         | chr14:62837689-62956886   | 4.3432   | 4.0177   | -0.1124 | 0.402680 |
| <i>Lnpep</i>         | chr17:17527722-17624489   | 96.5915  | 99.5555  | 0.0436  | 0.749607 |
| <i>Zfp52</i>         | chr17:21555045-21562066   | 14.8252  | 15.3273  | 0.0481  | 0.663955 |
| <i>Traf7</i>         | chr17:24508561-24527938   | 20.0092  | 19.0950  | -0.0675 | 0.376192 |
| <i>Rpsd1</i>         | chr17:25727750-25731456   | 2.8017   | 2.9962   | 0.0968  | 0.515911 |
| <i>Metrn</i>         | chr17:25794570-25797136   | 9.6837   | 9.0130   | -0.1035 | 0.437514 |
| <i>Cpne5</i>         | chr17:29156549-29237797   | 0.0743   | 0.0612   | -0.2793 | 0.163964 |
| <i>Cyp4f16</i>       | chr17:32536557-32551798   | 0.7775   | 0.8807   | 0.1797  | 0.655290 |
| <i>B3galt4</i>       | chr17:33949913-33951488   | 17.6255  | 16.5886  | -0.0875 | 0.457202 |
| <i>Ehhadh</i>        | chr16:21761286-21787844   | 5.3302   | 5.5709   | 0.0637  | 0.655846 |
| <i>Cd200r1</i>       | chr16:44765735-44794978   | 1.3983   | 1.2288   | -0.1864 | 0.398210 |
| <i>1810055G02Rik</i> | chr19:3708332-3717881     | 0.6892   | 0.7988   | 0.2128  | 0.562386 |
| <i>Scly</i>          | chr1:91298337-91321075    | 6.1007   | 6.3137   | 0.0495  | 0.695771 |
| <i>Thap4</i>         | chr1:93705390-93754838    | 5.7170   | 5.9467   | 0.0568  | 0.507776 |
| <i>Tmem9</i>         | chr1:136008218-136035030  | 7.1583   | 6.6566   | -0.1048 | 0.415408 |
| <i>Gm10031</i>       | chr1:156524091-156526659  | 1.0748   | 0.9481   | -0.1810 | 0.393363 |
| <i>Itpkb</i>         | chr1:180330484-180424802  | 43.7562  | 41.6618  | -0.0708 | 0.458070 |
| <i>Arhgap12</i>      | chr18:6024426-6136098     | 10.0636  | 10.3645  | 0.0425  | 0.662685 |
| <i>Eif1a</i>         | chr18:46597703-46610225   | 29.2607  | 29.9195  | 0.0321  | 0.661341 |
| <i>Lmnb1</i>         | chr18:56707812-56753424   | 10.9640  | 11.3330  | 0.0478  | 0.711266 |
| <i>Hspa14</i>        | chr2:3488849-3512814      | 14.7107  | 14.0814  | -0.0631 | 0.218721 |
| <i>Zmynd19</i>       | chr2:24949791-24962075    | 5.0074   | 4.7059   | -0.0896 | 0.382391 |
| <i>Sec16a</i>        | chr2:26409430-26445216    | 27.4414  | 26.0528  | -0.0749 | 0.494628 |
| <i>Nup214</i>        | chr2:31974435-32053975    | 9.9450   | 9.4392   | -0.0753 | 0.466607 |
| <i>Gm27003</i>       | chr2:126675915-126683805  | 7.4080   | 6.5436   | -0.1790 | 0.521780 |
| <i>E2f1</i>          | chr2:154559406-154569892  | 0.9495   | 1.0442   | 0.1372  | 0.600593 |
| <i>4930518I15Rik</i> | chr2:156856615-156857946  | 7.2170   | 6.6905   | -0.1093 | 0.406036 |
| <i>Jade1</i>         | chr3:41555733-41616862    | 13.1842  | 13.4702  | 0.0310  | 0.637033 |
| <i>Maml3</i>         | chr3:51687610-52104891    | 2.3459   | 2.1913   | -0.0984 | 0.415533 |
| <i>Serp1</i>         | chr3:58521968-58525873    | 72.5935  | 74.7597  | 0.0424  | 0.701933 |
| <i>Lrrc71</i>        | chr3:87736922-87748625    | 1.3378   | 1.4502   | 0.1164  | 0.601501 |
| <i>Lix1l</i>         | chr3:96601132-96625352    | 1.2898   | 1.1343   | -0.1854 | 0.456745 |
| <i>Cenpe</i>         | chr3:135212562-135273540  | 2.2745   | 2.4531   | 0.1090  | 0.757020 |
| <i>Mttn</i>          | chr3:138089854-138143388  | 0.4014   | 0.4447   | 0.1479  | 0.132459 |
| <i>Gm6297</i>        | chr4:40720153-40722398    | 2.1362   | 2.3581   | 0.1426  | 0.702051 |
| <i>Hectd3</i>        | chr4:116995316-117005277  | 21.1474  | 21.6660  | 0.0350  | 0.724632 |
| <i>Med8</i>          | chr4:118409336-118415782  | 21.4051  | 21.8560  | 0.0301  | 0.607554 |
| <i>Vps13d</i>        | chr4:144972625-145194995  | 15.6334  | 14.9047  | -0.0689 | 0.437473 |
| <i>Pjfo</i>          | chr3:105996956-106014646  | 1.6265   | 1.2631   | -0.3647 | 0.692947 |
| <i>Cfap36</i>        | chr11:29221531-29247409   | 8.2009   | 8.4963   | 0.0511  | 0.651877 |
| <i>Atad2b</i>        | chr12:4917403-5044047     | 20.5350  | 21.0082  | 0.0329  | 0.702403 |
| <i>Gm27014</i>       | chr12:54963063-54964200   | 2.2019   | 1.9317   | -0.1889 | 0.364561 |
| <i>Hist1h4h</i>      | chr13:23531043-23531519   | 132.5251 | 139.1441 | 0.0703  | 0.724272 |
| <i>Nim1k</i>         | chr13:119710093-119755882 | 0.6739   | 0.7225   | 0.1004  | 0.581592 |
| <i>Slain2</i>        | chr5:72914303-72978829    | 15.0109  | 15.2538  | 0.0232  | 0.605433 |
| <i>Pak1</i>          | chr7:97842934-97912381    | 2.8827   | 2.6437   | -0.1249 | 0.503088 |
| <i>Ddx49</i>         | chr8:70292865-70302489    | 19.2440  | 18.2442  | -0.0770 | 0.397833 |
| <i>4933433G15Rik</i> | chr9:75410183-75417709    | 1.7355   | 1.8808   | 0.1160  | 0.464386 |
| <i>Topbp1</i>        | chr9:103305214-103350432  | 45.6527  | 46.2943  | 0.0201  | 0.707538 |
| <i>Zfx</i>           | chrX:94074630-94123702    | 14.6128  | 13.9314  | -0.0689 | 0.356235 |
| <i>Ttc33</i>         | chr15:5185524-5218336     | 18.8045  | 19.3667  | 0.0425  | 0.651881 |
| <i>Azin1</i>         | chr15:38487429-38519266   | 24.3213  | 23.1431  | -0.0716 | 0.397874 |
| <i>Gm10863</i>       | chr15:79166040-79227524   | 5.1585   | 4.7309   | -0.1248 | 0.515883 |
| <i>Chchd1</i>        | chr14:20703026-20704417   | 62.5601  | 65.7954  | 0.0727  | 0.710740 |
| <i>Smim4</i>         | chr14:31088868-31128930   | 21.3129  | 19.6134  | -0.1199 | 0.515550 |
| <i>Txndc16</i>       | chr14:45134447-45220328   | 4.9918   | 4.7239   | -0.0796 | 0.444355 |
| <i>4931414P19Rik</i> | chr14:54583662-54605908   | 2.0193   | 2.1383   | 0.0826  | 0.261271 |
| <i>Gm26130</i>       | chr17:12919584-12919722   | 35.5087  | 31.9325  | -0.1531 | 0.537658 |
| <i>Ppt2</i>          | chr17:34616661-34628510   | 5.1351   | 4.7841   | -0.1022 | 0.458499 |
| <i>Son</i>           | chr16:91647505-91679221   | 79.2209  | 76.3594  | -0.0531 | 0.131853 |
| <i>Zdhhc24</i>       | chr19:4878667-4885397     | 4.0880   | 3.8109   | -0.1012 | 0.340674 |
| <i>Asrgl1</i>        | chr19:9109867-9135636     | 8.4757   | 8.6925   | 0.0364  | 0.636096 |
| <i>Gm16726</i>       | chr19:46264538-46267669   | 6.5353   | 5.9353   | -0.1389 | 0.501673 |
| <i>Tmx2</i>          | chr2:84671315-84679140    | 7.9966   | 8.2782   | 0.0499  | 0.624927 |
| <i>Slc12a5</i>       | chr2:164960815-164999727  | 0.1943   | 0.1660   | -0.2265 | 0.241982 |
| <i>Nr4a3</i>         | chr4:48045152-48086447    | 1.3777   | 1.4573   | 0.0811  | 0.619345 |



|                      |                           |          |          |         |          |
|----------------------|---------------------------|----------|----------|---------|----------|
| <i>Eva1b</i>         | chr4:126147743-126149875  | 10.5443  | 9.7488   | -0.1132 | 0.556391 |
| <i>Smim1</i>         | chr4:154020469-154026230  | 2.5321   | 2.3606   | -0.1012 | 0.425379 |
| <i>Tbxas1</i>        | chr6:38875403-39084585    | 0.1704   | 0.1916   | 0.1691  | 0.555519 |
| <i>Picalm</i>        | chr7:90130231-90209447    | 90.8710  | 92.2484  | 0.0217  | 0.719883 |
| <i>Dedd</i>          | chr1:171329144-171342331  | 6.6551   | 6.3456   | -0.0687 | 0.141753 |
| <i>Vamp7-ps</i>      | chr2:174046618-174047273  | 9.3668   | 9.9531   | 0.0876  | 0.545980 |
| <i>Kat8</i>          | chr7:127912516-127925832  | 20.5747  | 19.2836  | -0.0935 | 0.481285 |
| <i>Vta1</i>          | chr10:14654754-14705560   | 18.2764  | 18.7715  | 0.0386  | 0.649735 |
| <i>NA</i>            | chr10:22113049-22149270   | 1.3644   | 1.2127   | -0.1700 | 0.387799 |
| <i>Zwint</i>         | chr10:72654844-72674964   | 13.1318  | 13.4951  | 0.0394  | 0.685950 |
| <i>Z810425M01Rik</i> | chr10:77486663-77516430   | 6.8482   | 6.3650   | -0.1056 | 0.428657 |
| <i>Ap3d1</i>         | chr10:80706977-80742211   | 38.7277  | 37.2666  | -0.0555 | 0.181114 |
| <i>Tmed4</i>         | chr11:6270368-6274870     | 15.5591  | 14.7966  | -0.0725 | 0.212780 |
| <i>Ddc</i>           | chr11:11814100-11898144   | 2.6657   | 2.4300   | -0.1335 | 0.524156 |
| <i>Eldr</i>          | chr11:16935153-16951282   | 0.4191   | 0.4823   | 0.2027  | 0.524765 |
| <i>Blmh</i>          | chr11:76924808-76987379   | 13.2080  | 12.5671  | -0.0718 | 0.360290 |
| <i>Ankrd13b</i>      | chr11:77470484-77489678   | 1.6492   | 1.4849   | -0.1514 | 0.634578 |
| <i>Chad</i>          | chr11:94565046-94569127   | 1.0846   | 0.9421   | -0.2031 | 0.397251 |
| <i>Kpnb1</i>         | chr11:97159713-97187881   | 63.4786  | 61.1386  | -0.0542 | 0.129509 |
| <i>Tubg1</i>         | chr11:101119937-101126419 | 7.0554   | 6.5816   | -0.1003 | 0.477887 |
| <i>Gm11655</i>       | chr11:108181849-108194126 | 2.2906   | 2.5985   | 0.1820  | 0.627311 |
| <i>Ttc32</i>         | chr12:9029996-9036394     | 5.6919   | 6.1118   | 0.1027  | 0.588220 |
| <i>Bzw2</i>          | chr12:36091845-36156825   | 85.5915  | 80.9561  | -0.0803 | 0.494996 |
| <i>Tdp2</i>          | chr13:24831678-24842153   | 27.3159  | 28.0833  | 0.0400  | 0.688855 |
| <i>Tubb2b</i>        | chr13:34127007-34130354   | 0.9840   | 0.8561   | -0.2009 | 0.376309 |
| <i>Nfil3</i>         | chr13:52967208-52981073   | 1.8118   | 1.6191   | -0.1622 | 0.466775 |
| <i>Mir27b</i>        | chr13:63300699-63300796   | 28.4714  | 25.0625  | -0.1840 | 0.501728 |
| <i>Rasa1</i>         | chr13:85214779-85289029   | 32.5246  | 33.1407  | 0.0271  | 0.717945 |
| <i>Cdkl2</i>         | chr5:92006073-92043042    | 0.2387   | 0.2728   | 0.1928  | 0.462261 |
| <i>Wbscr27</i>       | chr5:134932367-134942637  | 8.2589   | 8.6850   | 0.0726  | 0.712644 |
| <i>Ywhag</i>         | chr5:135908408-135934616  | 13.0081  | 12.3754  | -0.0719 | 0.436216 |
| <i>Slc25a13</i>      | chr6:6041217-6217118      | 3.0407   | 3.2133   | 0.0797  | 0.701534 |
| <i>Tmem168</i>       | chr6:13580686-13608100    | 16.5232  | 16.8458  | 0.0279  | 0.691287 |
| <i>Trbv29</i>        | chr6:41271402-41271881    | 114.6782 | 105.5695 | -0.1194 | 0.613957 |
| <i>Camk1</i>         | chr6:113334123-113343984  | 0.8990   | 0.9510   | 0.0811  | 0.406198 |
| <i>Gm24391</i>       | chr6:120524896-120524998  | 8.7591   | 7.0358   | -0.3161 | 0.552125 |
| <i>1810019N24Rik</i> | chr7:12948591-12961768    | 0.8956   | 1.0210   | 0.1890  | 0.474674 |
| <i>Gemin7</i>        | chr7:19564945-19573823    | 15.5215  | 14.5979  | -0.0885 | 0.380290 |
| <i>ApoE</i>          | chr7:19696108-19699166    | 2.9580   | 2.6812   | -0.1418 | 0.540822 |
| <i>C630016N16Rik</i> | chr7:30729578-30745929    | 8.5332   | 7.9591   | -0.1005 | 0.312288 |
| <i>Nosip</i>         | chr7:45062428-45078503    | 13.8593  | 14.2511  | 0.0402  | 0.672354 |
| <i>Gm7027</i>        | chr7:101573459-101574321  | 2.5324   | 2.2133   | -0.1943 | 0.494606 |
| <i>Arl6ip1</i>       | chr7:118118890-118129625  | 101.5758 | 96.4259  | -0.0751 | 0.451889 |
| <i>Palb2</i>         | chr7:122107261-122132946  | 2.4965   | 2.6052   | 0.0615  | 0.611025 |
| <i>Gm2044</i>        | chr7:139957004-139958039  | 1.4814   | 1.6877   | 0.1881  | 0.487815 |
| <i>NA</i>            | chr7:143634805-143636585  | 3.2139   | 2.9122   | -0.1422 | 0.476595 |
| <i>Faddos</i>        | chr7:144567354-144581512  | 2.6451   | 2.8686   | 0.1170  | 0.342320 |
| <i>March1</i>        | chr8:65617899-66471637    | 0.1445   | 0.1701   | 0.2348  | 0.624497 |
| <i>Kxd1</i>          | chr8:70508271-70527956    | 17.8835  | 18.4722  | 0.0467  | 0.710859 |
| <i>Mcm5</i>          | chr8:75109527-75128439    | 22.3735  | 22.8638  | 0.0313  | 0.736615 |
| <i>Gm27021</i>       | chr8:120608785-120668079  | 3.2010   | 2.7651   | -0.2112 | 0.530641 |
| <i>Fam89a</i>        | chr8:124740256-124751809  | 1.3128   | 1.4663   | 0.1595  | 0.526748 |
| <i>Gm20603</i>       | chr9:21028306-21032357    | 8.7392   | 8.1981   | -0.0922 | 0.518024 |
| <i>Rbm7</i>          | chr9:48488708-48495330    | 53.9754  | 55.2407  | 0.0334  | 0.679126 |
| <i>Slc35f2</i>       | chr9:53771534-53818161    | 8.1394   | 8.4398   | 0.0523  | 0.693974 |
| <i>Apeh</i>          | chr9:108085416-108094480  | 30.4598  | 28.9508  | -0.0733 | 0.372690 |
| <i>Deb1</i>          | chr9:121710388-121712921  | 12.8929  | 13.7395  | 0.0918  | 0.642684 |
| <i>Prickle3</i>      | chrX:7657259-7668186      | 4.3713   | 4.5607   | 0.0612  | 0.703039 |
| <i>Wdr13</i>         | chrX:8123300-8132892      | 10.9857  | 10.4708  | -0.0693 | 0.307901 |
| <i>Taz</i>           | chrX:74281911-74290151    | 18.4086  | 17.5708  | -0.0672 | 0.358836 |
| <i>Il2rb</i>         | chr15:78480552-78495066   | 130.4495 | 136.2094 | 0.0623  | 0.764135 |
| <i>Pphln1</i>        | chr15:93398349-93491913   | 9.6820   | 9.9670   | 0.0419  | 0.645588 |
| <i>1700010I14Rik</i> | chr17:8988332-9008319     | 4.0418   | 3.7571   | -0.1054 | 0.286080 |
| <i>Oaz1-ps</i>       | chr17:17345455-17346140   | 9.1599   | 8.3323   | -0.1366 | 0.495204 |
| <i>Cuta</i>          | chr17:26937972-26939478   | 47.3578  | 48.9306  | 0.0471  | 0.655210 |
| <i>Prrt1</i>         | chr17:34629532-34633126   | 1.8419   | 2.0352   | 0.1439  | 0.653420 |
| <i>Tnfrsf81</i>      | chr17:56162476-56173955   | 13.5261  | 13.9908  | 0.0487  | 0.679905 |
| <i>Gm26561</i>       | chr17:70878077-71393284   | 9.3545   | 9.8353   | 0.0723  | 0.715851 |
| <i>Myl12a</i>        | chr17:70993655-71002878   | 52.5841  | 49.6107  | -0.0840 | 0.503707 |
| <i>Msh6</i>          | chr17:87975049-87990883   | 26.9475  | 25.6867  | -0.0691 | 0.374887 |
| <i>Coro7</i>         | chr16:4626132-4679777     | 9.3780   | 8.8077   | -0.0905 | 0.555522 |

|                      |                           |          |          |         |          |
|----------------------|---------------------------|----------|----------|---------|----------|
| <i>Gm15983</i>       | chr16:5254785-5289621     | 0.5241   | 0.4615   | -0.1834 | 0.456725 |
| <i>Spidr</i>         | chr16:15889226-16146851   | 7.9336   | 8.1556   | 0.0398  | 0.526076 |
| <i>Capn1</i>         | chr19:5988545-6015825     | 69.1128  | 65.8544  | -0.0697 | 0.413064 |
| <i>Gm22744</i>       | chr19:8725091-8725156     | 90.4351  | 96.4269  | 0.0926  | 0.664989 |
| <i>1810009A15Rik</i> | chr19:8888902-8890740     | 60.6927  | 63.3512  | 0.0619  | 0.721150 |
| <i>Zdhhc16</i>       | chr19:41933471-41944095   | 18.4046  | 17.4859  | -0.0739 | 0.263951 |
| <i>Sgk3</i>          | chr1:9798129-9902556      | 11.0892  | 10.3269  | -0.1027 | 0.602634 |
| <i>Hspd1</i>         | chr1:55077834-55088243    | 36.4251  | 34.4361  | -0.0810 | 0.481640 |
| <i>Gm3608</i>        | chr1:105455970-105458829  | 0.6544   | 0.5714   | -0.1956 | 0.137920 |
| <i>Mapkapk2</i>      | chr1:131053703-131097543  | 28.4619  | 28.9564  | 0.0248  | 0.658505 |
| <i>Sft2d2</i>        | chr1:165174340-165194433  | 25.5731  | 24.4798  | -0.0630 | 0.290696 |
| <i>Zfp35</i>         | chr18:23989631-24005376   | 8.1967   | 7.7385   | -0.0830 | 0.294784 |
| <i>Wdr76</i>         | chr2:121506722-121544860  | 6.1478   | 6.3068   | 0.0368  | 0.684254 |
| <i>Gm14232</i>       | chr2:131159536-131171342  | 1.7195   | 2.0132   | 0.2275  | 0.310553 |
| <i>mt-Tt</i>         | chrM:15288-15355          | 15.7186  | 19.6802  | 0.3243  | 0.679473 |
| <i>Prpf3</i>         | chr3:95830123-95855885    | 10.0704  | 10.3294  | 0.0366  | 0.667653 |
| <i>Fpgt</i>          | chr3:155084920-155093378  | 12.3790  | 11.7374  | -0.0768 | 0.341625 |
| <i>Rad54l</i>        | chr4:116094263-116123690  | 2.5636   | 2.6512   | 0.0485  | 0.643111 |
| <i>Btbd19</i>        | chr4:117119218-117125725  | 6.6729   | 6.8911   | 0.0464  | 0.630424 |
| <i>Smim12</i>        | chr4:127243783-127247809  | 21.6501  | 22.5192  | 0.0568  | 0.671021 |
| <i>Isca1</i>         | chr13:59755408-59769810   | 3.4196   | 3.1991   | -0.0962 | 0.427029 |
| <i>Asl</i>           | chr5:130011257-130025132  | 5.1591   | 4.8331   | -0.0942 | 0.495065 |
| <i>Rcbtb2</i>        | chr14:73123036-73207843   | 8.2051   | 7.8287   | -0.0677 | 0.278981 |
| <i>Mtch1</i>         | chr17:29332071-29347904   | 18.2717  | 17.4956  | -0.0626 | 0.009811 |
| <i>Trmt61b</i>       | chr17:71557026-71598755   | 3.1210   | 3.2586   | 0.0622  | 0.418984 |
| <i>Gm15971</i>       | chr16:94620376-94620587   | 12.4038  | 10.8835  | -0.1886 | 0.512436 |
| <i>Scp2</i>          | chr4:108043838-108144998  | 17.5916  | 18.5226  | 0.0744  | 0.722911 |
| <i>Gm15747</i>       | chr5:123393648-123397957  | 4.6150   | 4.1070   | -0.1683 | 0.516219 |
| <i>Zfp14</i>         | chr7:30038052-30044734    | 4.6898   | 4.2605   | -0.1385 | 0.502492 |
| <i>Gmp</i>           | chr8:69808678-69821870    | 25.1155  | 24.0567  | -0.0621 | 0.348199 |
| <i>Plin3</i>         | chr17:56278961-56290511   | 17.2895  | 17.7996  | 0.0420  | 0.694632 |
| <i>Nhs1</i>          | chr10:18390321-18533892   | 0.7841   | 0.8273   | 0.0775  | 0.696352 |
| <i>Sgk1</i>          | chr10:21882183-21999903   | 35.2154  | 36.1141  | 0.0364  | 0.731982 |
| <i>Sec63</i>         | chr10:42761495-42832514   | 13.2479  | 13.5006  | 0.0273  | 0.704264 |
| <i>Asf1a</i>         | chr10:53596960-53609213   | 25.1663  | 23.8444  | -0.0778 | 0.434417 |
| <i>Dnajc12</i>       | chr10:63382442-63408840   | 0.6289   | 0.5460   | -0.2038 | 0.392018 |
| <i>Nrbf2</i>         | chr10:67266688-67285305   | 3.8176   | 4.0243   | 0.0761  | 0.603324 |
| <i>Adora2a</i>       | chr10:75316942-75334788   | 6.7545   | 6.1600   | -0.1329 | 0.596307 |
| <i>Stk11</i>         | chr10:80115802-80130682   | 17.4205  | 16.5602  | -0.0731 | 0.448351 |
| <i>Fhl4</i>          | chr10:85097018-85102495   | 0.7749   | 0.6767   | -0.1955 | 0.478379 |
| <i>Cdk17</i>         | chr10:93160875-93241342   | 74.7381  | 75.6067  | 0.0167  | 0.666170 |
| <i>Cct2</i>          | chr10:117050997-117063814 | 236.4106 | 240.5508 | 0.0250  | 0.719960 |
| <i>B4galnt1</i>      | chr10:127165155-127172340 | 235.8413 | 241.4951 | 0.0342  | 0.761064 |
| <i>Ptges3</i>        | chr10:128058953-128077272 | 13.2265  | 12.4374  | -0.0887 | 0.503405 |
| <i>Pa2g4</i>         | chr10:128557765-128565934 | 38.8130  | 39.7750  | 0.0353  | 0.708797 |
| <i>Vmn2r84</i>       | chr10:130385315-130394241 | 2.0301   | 1.8132   | -0.1630 | 0.651804 |
| <i>Tug1</i>          | chr11:3639784-3649673     | 41.4640  | 39.4664  | -0.0712 | 0.492367 |
| <i>Pes1</i>          | chr11:3963974-3980004     | 25.3892  | 25.9038  | 0.0289  | 0.707579 |
| <i>Thoc5</i>         | chr11:4895319-4928867     | 23.5775  | 23.9281  | 0.0213  | 0.657720 |
| <i>Polm</i>          | chr11:5827859-5838016     | 5.2773   | 5.5068   | 0.0614  | 0.735029 |
| <i>Aftph</i>         | chr11:20685083-20741589   | 26.2983  | 26.7015  | 0.0219  | 0.650333 |
| <i>Nsg2</i>          | chr11:32000462-32059202   | 94.1078  | 95.5257  | 0.0216  | 0.739141 |
| <i>Mat2b</i>         | chr11:40679313-40695203   | 27.8583  | 26.6394  | -0.0645 | 0.313606 |
| <i>Itk</i>           | chr11:46325149-46389515   | 154.4959 | 148.7241 | -0.0549 | 0.256486 |
| <i>Col23a1</i>       | chr11:51289919-51583918   | 4.5729   | 4.2787   | -0.0959 | 0.563430 |
| <i>Kif3a</i>         | chr11:53567378-53601967   | 0.8569   | 0.9371   | 0.1291  | 0.582005 |
| <i>Gm12229</i>       | chr11:54746356-54746824   | 2.5156   | 2.9167   | 0.2135  | 0.611730 |
| <i>Guk1</i>          | chr11:59183874-59192212   | 16.0962  | 15.1341  | -0.0889 | 0.488351 |
| <i>Nt5m</i>          | chr11:59839446-59880968   | 3.7021   | 3.4421   | -0.1050 | 0.503338 |
| <i>Llg1</i>          | chr11:60699722-60714186   | 11.2187  | 10.7319  | -0.0640 | 0.281775 |
| <i>Cntrob</i>        | chr11:69299486-69323775   | 3.9264   | 3.6766   | -0.0948 | 0.538739 |
| <i>Rabep1</i>        | chr11:70844777-70943105   | 19.7779  | 18.8238  | -0.0713 | 0.458956 |
| <i>Rpain</i>         | chr11:70970212-70977833   | 12.9523  | 13.2969  | 0.0379  | 0.717919 |
| <i>Ankfy1</i>        | chr11:72690005-72772146   | 18.1148  | 18.3919  | 0.0219  | 0.750381 |
| <i>Myo1c</i>         | chr11:75650503-75673910   | 4.0432   | 3.7903   | -0.0932 | 0.534018 |
| <i>Fam57a</i>        | chr11:76179670-76214827   | 5.8359   | 5.5519   | -0.0720 | 0.381515 |
| <i>Cryba1</i>        | chr11:77718614-77725283   | 1.0431   | 1.1841   | 0.1829  | 0.635104 |
| <i>Phf12</i>         | chr11:77982753-78030539   | 17.2914  | 16.4568  | -0.0714 | 0.500944 |
| <i>Flot2</i>         | chr11:78037930-78060434   | 7.8675   | 8.2316   | 0.0653  | 0.696137 |
| <i>Rhot1</i>         | chr11:80209018-80267907   | 13.2087  | 12.6313  | -0.0645 | 0.358322 |
| <i>Pex12</i>         | chr11:83294641-83302586   | 4.6145   | 4.3437   | -0.0873 | 0.394029 |

|                      |                           |          |          |         |          |
|----------------------|---------------------------|----------|----------|---------|----------|
| <i>Dhrs11</i>        | chr11:84820855-84828994   | 4.8938   | 4.4722   | -0.1300 | 0.572429 |
| <i>Cltc</i>          | chr11:86694350-86757565   | 42.7252  | 40.7246  | -0.0692 | 0.525854 |
| <i>Mir142b</i>       | chr11:87756863-87756927   | 103.6393 | 94.2887  | -0.1364 | 0.555897 |
| <i>2010300F17Rik</i> | chr11:96712981-96747436   | 22.3474  | 22.7912  | 0.0284  | 0.613882 |
| <i>Zpbp2</i>         | chr11:98551096-98558665   | 1.7242   | 1.5469   | -0.1566 | 0.321177 |
| <i>Gm10039</i>       | chr11:100361617-100362151 | 3.6710   | 3.1581   | -0.2171 | 0.612845 |
| <i>Rundc1</i>        | chr11:101425084-101435673 | 9.7175   | 9.9563   | 0.0350  | 0.658252 |
| <i>Tmem106a</i>      | chr11:101582241-101591788 | 0.8388   | 0.9254   | 0.1417  | 0.643040 |
| <i>Ccdc43</i>        | chr11:102684685-102697782 | 11.0942  | 10.5501  | -0.0725 | 0.313742 |
| <i>1700028N14Rik</i> | chr11:103264859-103267745 | 3.2705   | 3.5897   | 0.1344  | 0.597169 |
| <i>Kcnh6</i>         | chr11:106008123-106034549 | 0.8870   | 0.9656   | 0.1226  | 0.645868 |
| <i>Ccdc47</i>        | chr11:106197407-106216344 | 17.3299  | 16.5472  | -0.0667 | 0.348543 |
| <i>Icam2</i>         | chr11:106377655-106388075 | 27.4660  | 26.2384  | -0.0660 | 0.236924 |
| <i>Smurf2</i>        | chr11:106820065-106920715 | 25.0529  | 25.4247  | 0.0212  | 0.714691 |
| <i>1810010H24Rik</i> | chr11:107028117-107030443 | 1.4166   | 1.6058   | 0.1809  | 0.675102 |
| <i>Nol11</i>         | chr11:107166662-107189381 | 16.9464  | 16.1578  | -0.0687 | 0.355222 |
| <i>2310067B10Rik</i> | chr11:115765432-115799366 | 7.3688   | 6.9188   | -0.0909 | 0.567333 |
| <i>Eif4a3</i>        | chr11:119288362-119300089 | 44.3993  | 45.0867  | 0.0222  | 0.643955 |
| <i>Smc6</i>          | chr12:11265885-11319785   | 47.4869  | 48.4784  | 0.0298  | 0.723503 |
| <i>Dock4</i>         | chr12:40446052-40846486   | 0.2516   | 0.2187   | -0.2020 | 0.472601 |
| <i>Nubpl</i>         | chr12:52097736-52312744   | 0.9982   | 0.8936   | -0.1598 | 0.572714 |
| <i>Gm9812</i>        | chr12:55820610-55821580   | 5.7593   | 5.2239   | -0.1408 | 0.560178 |
| <i>Atp5s</i>         | chr12:69724961-69744658   | 2.2083   | 1.9840   | -0.1545 | 0.466766 |
| <i>Mfsd7c</i>        | chr12:85746538-85813585   | 0.3894   | 0.4379   | 0.1694  | 0.371412 |
| <i>Eml5</i>          | chr12:98786603-98901484   | 13.4785  | 13.7062  | 0.0242  | 0.732417 |
| <i>Lgmn</i>          | chr12:102394083-102439813 | 0.5946   | 0.6674   | 0.1667  | 0.532338 |
| <i>Gm20604</i>       | chr12:102741731-102758672 | 5.0986   | 5.2805   | 0.0506  | 0.616977 |
| <i>Moap1</i>         | chr12:102742229-102743661 | 5.0109   | 4.5609   | -0.1357 | 0.501116 |
| <i>Gm16084</i>       | chr12:107147163-107160207 | 1.6152   | 1.3347   | -0.2752 | 0.574970 |
| <i>Ighm</i>          | chr12:113418949-113422730 | 251.0380 | 234.7030 | -0.0971 | 0.600982 |
| <i>Fam208b</i>       | chr13:3566035-3611108     | 45.0336  | 42.8293  | -0.0724 | 0.516497 |
| <i>Pitrm1</i>        | chr13:6548156-6580139     | 31.2946  | 30.0824  | -0.0570 | 0.152195 |
| <i>Psm2</i>          | chr13:14613241-14625671   | 133.9763 | 138.1356 | 0.0441  | 0.739437 |
| <i>Hist1h2bl</i>     | chr13:21715762-21716143   | 6.8920   | 7.5954   | 0.1402  | 0.582334 |
| <i>Hist1h3c</i>      | chr13:23744972-23745602   | 8.0197   | 8.7095   | 0.1190  | 0.715626 |
| <i>Gm11345</i>       | chr13:24366775-24375950   | 7.5832   | 8.1458   | 0.1032  | 0.625233 |
| <i>BC005537</i>      | chr13:24801656-24814013   | 64.8044  | 66.6807  | 0.0412  | 0.769700 |
| <i>Hus1b</i>         | chr13:30946572-30947759   | 0.9319   | 0.7496   | -0.3140 | 0.525226 |
| <i>Nrn1</i>          | chr13:36725624-36734477   | 1.4009   | 1.5645   | 0.1593  | 0.679040 |
| <i>Tmem170b</i>      | chr13:41606215-41641347   | 4.5321   | 4.6503   | 0.0371  | 0.683719 |
| <i>Hk3</i>           | chr13:55005984-55021385   | 0.9511   | 0.8478   | -0.1659 | 0.540859 |
| <i>Gm17617</i>       | chr13:55132961-55133548   | 58.5195  | 51.5883  | -0.1819 | 0.311924 |
| <i>Zfp935</i>        | chr13:62454322-62466709   | 10.5198  | 9.7598   | -0.1082 | 0.501041 |
| <i>Zfp748</i>        | chr13:67538640-67553138   | 17.6744  | 16.6173  | -0.0890 | 0.551572 |
| <i>Cmya5</i>         | chr13:93040712-93144724   | 1.2062   | 1.2480   | 0.0491  | 0.648607 |
| <i>Nsa2</i>          | chr13:97129426-97137926   | 23.2011  | 24.4531  | 0.0758  | 0.728782 |
| <i>Cdk7</i>          | chr13:100697026-100730942 | 9.2038   | 8.7521   | -0.0726 | 0.394326 |
| <i>Gm2822</i>        | chr13:108313098-108316273 | 0.7729   | 0.8530   | 0.1423  | 0.556632 |
| <i>Mrps30</i>        | chr13:118380109-118387252 | 30.9396  | 31.5693  | 0.0291  | 0.650267 |
| <i>Fam133b</i>       | chr5:3543843-3569810      | 25.8074  | 26.7255  | 0.0504  | 0.700292 |
| <i>Pex1</i>          | chr5:3596065-3637232      | 3.2378   | 3.0460   | -0.0881 | 0.514075 |
| <i>Rundc3b</i>       | chr5:8490333-8622952      | 9.4914   | 9.7918   | 0.0450  | 0.725154 |
| <i>Gm5106</i>        | chr5:8773576-8798523      | 0.7987   | 0.6703   | -0.2529 | 0.390599 |
| <i>Nupl2</i>         | chr5:24164962-24184013    | 3.0915   | 3.2310   | 0.0637  | 0.701208 |
| <i>Fastk</i>         | chr5:24438439-24445287    | 17.6747  | 18.0676  | 0.0317  | 0.721656 |
| <i>Krtcap3</i>       | chr5:31251690-31253202    | 9.9178   | 9.1416   | -0.1176 | 0.577221 |
| <i>Zfp512</i>        | chr5:31452435-31481749    | 14.8069  | 14.1089  | -0.0697 | 0.278695 |
| <i>Supt7l</i>        | chr5:31514568-31527807    | 6.4868   | 6.6992   | 0.0465  | 0.699770 |
| <i>Depdc5</i>        | chr5:32863700-32994231    | 5.9915   | 5.7260   | -0.0654 | 0.329167 |
| <i>Htt</i>           | chr5:34761739-34912534    | 12.7047  | 12.0413  | -0.0774 | 0.569760 |
| <i>Bloc1s4</i>       | chr5:36747373-36748679    | 10.6660  | 11.1078  | 0.0585  | 0.658396 |
| <i>5730480H06Rik</i> | chr5:48395572-48414294    | 1.3840   | 1.5580   | 0.1709  | 0.696186 |
| <i>Pi4k2b</i>        | chr5:52741586-52769344    | 2.6020   | 2.4316   | -0.0977 | 0.295998 |
| <i>NA</i>            | chr5:73193827-73256588    | 23.2206  | 23.8499  | 0.0386  | 0.741612 |
| <i>Dancr</i>         | chr5:74093059-74095405    | 5.0433   | 4.7249   | -0.0941 | 0.264618 |
| <i>Gm26582</i>       | chr5:92043063-92055960    | 55.6896  | 56.6289  | 0.0241  | 0.677778 |
| <i>Ccng2</i>         | chr5:93267256-93276231    | 21.3771  | 20.4892  | -0.0612 | 0.330909 |
| <i>C230066G23Rik</i> | chr5:105580439-105581772  | 4.3597   | 4.7717   | 0.1303  | 0.592604 |
| <i>Zfp644</i>        | chr5:106500893-106697287  | 21.9042  | 22.3222  | 0.0273  | 0.689549 |
| <i>Ep400</i>         | chr5:110664372-110770717  | 17.1882  | 17.7508  | 0.0465  | 0.770815 |
| <i>Pus1</i>          | chr5:110773666-110780659  | 17.9301  | 18.3762  | 0.0355  | 0.692404 |

|                      |                          |          |          |         |          |
|----------------------|--------------------------|----------|----------|---------|----------|
| <i>Ulk1</i>          | chr5:110784487-110810097 | 3.5192   | 3.6866   | 0.0670  | 0.694491 |
| <i>Ficd</i>          | chr5:113735781-113740600 | 3.4141   | 3.1840   | -0.1007 | 0.324159 |
| <i>Gm10401</i>       | chr5:115097688-115098295 | 18.2418  | 19.2409  | 0.0769  | 0.685857 |
| <i>Pebp1</i>         | chr5:117282650-117287625 | 11.7388  | 10.8826  | -0.1093 | 0.569319 |
| <i>Sfswap</i>        | chr5:129501230-129571383 | 25.9424  | 26.6200  | 0.0372  | 0.731936 |
| <i>Gatsl2</i>        | chr5:134099710-134144343 | 0.9984   | 0.9225   | -0.1140 | 0.462916 |
| <i>Limk1</i>         | chr5:134656038-134688590 | 6.6470   | 6.2676   | -0.0848 | 0.529339 |
| <i>Gpr146</i>        | chr5:139377741-139396415 | 14.7641  | 14.1555  | -0.0607 | 0.225972 |
| <i>Slc7a1</i>        | chr5:148327409-148399904 | 8.8429   | 9.2045   | 0.0578  | 0.766087 |
| <i>Acn9</i>          | chr6:6956003-7042979     | 1.1010   | 1.0040   | -0.1331 | 0.427622 |
| <i>Calu</i>          | chr6:29348068-29377110   | 33.8963  | 34.6147  | 0.0303  | 0.720017 |
| <i>Slc37a3</i>       | chr6:39334769-39377707   | 9.9945   | 9.4236   | -0.0849 | 0.552538 |
| <i>Zfp282</i>        | chr6:47877203-47908485   | 4.2624   | 4.3626   | 0.0335  | 0.648200 |
| <i>Gm7887</i>        | chr6:48524371-48525105   | 1.2485   | 1.4909   | 0.2559  | 0.610977 |
| <i>Cbx3</i>          | chr6:51470359-51483704   | 7.4713   | 7.6839   | 0.0405  | 0.640047 |
| <i>Plekha8</i>       | chr6:54595110-54645839   | 0.0941   | 0.1158   | 0.2996  | 0.597928 |
| <i>Fkbp9</i>         | chr6:56832058-56879358   | 0.3082   | 0.2549   | -0.2740 | 0.460763 |
| <i>Rnf103</i>        | chr6:71493893-71525020   | 8.5051   | 8.1248   | -0.0660 | 0.141539 |
| <i>Htra2</i>         | chr6:83051265-83055273   | 17.3067  | 17.8615  | 0.0455  | 0.747052 |
| <i>Anxa4</i>         | chr6:86736839-86793584   | 0.5634   | 0.6148   | 0.1259  | 0.578979 |
| <i>Ruvbl1</i>        | chr6:88465408-88497572   | 9.1865   | 9.4934   | 0.0474  | 0.594788 |
| <i>Mcm2</i>          | chr6:88883474-88898780   | 29.6719  | 30.1470  | 0.0229  | 0.724724 |
| <i>Mtmr14</i>        | chr6:113237842-113281387 | 13.6598  | 13.9506  | 0.0304  | 0.636387 |
| <i>Ankrd26</i>       | chr6:118502563-118562256 | 7.8764   | 7.5180   | -0.0672 | 0.267020 |
| <i>Pex26</i>         | chr6:121183666-121198837 | 3.0898   | 2.9184   | -0.0824 | 0.300023 |
| <i>Lpcat3</i>        | chr6:124663026-124704418 | 15.1197  | 14.4471  | -0.0657 | 0.194909 |
| <i>Spsb2</i>         | chr6:124808660-124810619 | 1.5452   | 1.6952   | 0.1336  | 0.571388 |
| <i>Mlf2</i>          | chr6:124931387-124936138 | 35.9518  | 36.7745  | 0.0326  | 0.656415 |
| <i>Cd27</i>          | chr6:125232621-125237010 | 116.1826 | 117.4404 | 0.0155  | 0.733247 |
| <i>2700089E24Rik</i> | chr6:133105238-133107747 | 22.4497  | 23.0897  | 0.0405  | 0.673741 |
| <i>NA</i>            | chr6:136608858-136610870 | 17.6323  | 18.2694  | 0.0512  | 0.767585 |
| <i>Recql</i>         | chr6:142350341-142387087 | 18.0129  | 17.1452  | -0.0712 | 0.425441 |
| <i>Rdh13</i>         | chr7:4424769-4445649     | 2.9317   | 2.7775   | -0.0780 | 0.258675 |
| <i>Qpctl</i>         | chr7:19140216-19149196   | 4.8951   | 4.5503   | -0.1054 | 0.485765 |
| <i>Ciptm1</i>        | chr7:19631580-19665030   | 21.2151  | 20.2957  | -0.0639 | 0.391746 |
| <i>Gsk3a</i>         | chr7:25228257-25237851   | 36.4768  | 37.2839  | 0.0316  | 0.725882 |
| <i>Pafah1b3</i>      | chr7:25295048-25297986   | 3.2026   | 2.9621   | -0.1127 | 0.411098 |
| <i>Blvrb</i>         | chr7:27447977-27466144   | 1.6714   | 1.8465   | 0.1437  | 0.582433 |
| <i>Uba2</i>          | chr7:34140688-34169599   | 43.6151  | 41.6596  | -0.0662 | 0.404455 |
| <i>C230052I12Rik</i> | chr7:35392274-35396817   | 7.6448   | 7.1455   | -0.0974 | 0.348447 |
| <i>Tbc1d17</i>       | chr7:44840900-44849079   | 13.7329  | 14.1561  | 0.0438  | 0.741669 |
| <i>A230056P14Rik</i> | chr7:55962530-55980868   | 0.3911   | 0.3271   | -0.2580 | 0.364477 |
| <i>Trpm1</i>         | chr7:64153834-64269775   | 1.9316   | 1.9917   | 0.0443  | 0.705233 |
| <i>Mrps11</i>        | chr7:78783118-78792989   | 5.7595   | 6.0148   | 0.0626  | 0.700453 |
| <i>Tm6sf1</i>        | chr7:81859000-81884434   | 22.8168  | 23.3478  | 0.0332  | 0.775089 |
| <i>C2cd3</i>         | chr7:100372232-100470159 | 12.3873  | 12.7483  | 0.0414  | 0.772524 |
| <i>Eri2</i>          | chr7:119768678-119794058 | 3.3523   | 3.4638   | 0.0472  | 0.681702 |
| <i>Usp31</i>         | chr7:121642020-121707253 | 7.1547   | 7.3507   | 0.0390  | 0.757358 |
| <i>Dctn5</i>         | chr7:122133040-122149044 | 32.3423  | 30.9291  | -0.0645 | 0.311655 |
| <i>Gtf3c1</i>        | chr7:125640954-125707780 | 18.9087  | 17.9719  | -0.0733 | 0.506791 |
| <i>Cd19</i>          | chr7:126408449-126414870 | 0.2799   | 0.3721   | 0.4107  | 0.622943 |
| <i>Bcl7c</i>         | chr7:127663352-127708933 | 0.9882   | 0.8845   | -0.1599 | 0.618124 |
| <i>Gm21974</i>       | chr7:127886226-127895454 | 2.7303   | 2.4543   | -0.1538 | 0.552540 |
| <i>Lhpp</i>          | chr7:132610637-132706420 | 1.1078   | 1.2122   | 0.1300  | 0.500351 |
| <i>Mmp21</i>         | chr7:133674269-133680061 | 0.3848   | 0.4468   | 0.2156  | 0.603208 |
| <i>9430038I01Rik</i> | chr7:137375573-137410762 | 1.3770   | 1.4473   | 0.0719  | 0.455638 |
| <i>Glrx3</i>         | chr7:137437647-137468594 | 12.3722  | 11.5618  | -0.0977 | 0.549894 |
| <i>Lrrc56</i>        | chr7:141194156-141210055 | 1.3129   | 1.2166   | -0.1099 | 0.417299 |
| <i>Muc6</i>          | chr7:141633971-141655319 | 0.1265   | 0.1491   | 0.2373  | 0.634748 |
| <i>Pcp2</i>          | chr8:3623370-3625545     | 1.8188   | 1.9619   | 0.1093  | 0.569812 |
| <i>Champ1</i>        | chr8:13869640-13881639   | 13.2702  | 13.5146  | 0.0263  | 0.708216 |
| <i>Gm26804</i>       | chr8:20292476-20420781   | 1.3312   | 1.5038   | 0.1759  | 0.518587 |
| <i>Ckap2</i>         | chr8:22168151-22185819   | 2.4789   | 2.6470   | 0.0947  | 0.725338 |
| <i>Dusp4</i>         | chr8:34807296-34819894   | 1.4445   | 1.2718   | -0.1837 | 0.582335 |
| <i>Asah1</i>         | chr8:41340196-41374773   | 10.5362  | 10.8516  | 0.0425  | 0.664730 |
| <i>Aga</i>           | chr8:53511701-53523421   | 14.9098  | 14.0814  | -0.0825 | 0.237271 |
| <i>Spcs3</i>         | chr8:54520432-54529998   | 40.6300  | 41.4405  | 0.0285  | 0.720928 |
| <i>Galnt7</i>        | chr8:57523827-57653032   | 11.9475  | 12.1981  | 0.0299  | 0.707274 |
| <i>2700029M09Rik</i> | chr8:60890417-60907580   | 19.5226  | 18.4998  | -0.0776 | 0.397088 |
| <i>Nek1</i>          | chr8:60993194-61131346   | 4.0175   | 4.1500   | 0.0468  | 0.723951 |
| <i>Sugp1</i>         | chr8:70042812-70071953   | 21.9253  | 20.4749  | -0.0987 | 0.580846 |

|                      |                           |         |         |         |          |
|----------------------|---------------------------|---------|---------|---------|----------|
| <i>Myo9b</i>         | chr8:71272713-71360712    | 42.8044 | 40.9508 | -0.0639 | 0.458758 |
| <i>Rfx1</i>          | chr8:84066835-84096992    | 14.0974 | 13.3579 | -0.0777 | 0.534516 |
| <i>Itfg1</i>         | chr8:85717556-85840949    | 24.3471 | 24.8336 | 0.0285  | 0.729940 |
| <i>Gm15890</i>       | chr8:94379236-94386972    | 1.9715  | 2.2945  | 0.2189  | 0.617311 |
| <i>Car7</i>          | chr8:104534699-104550343  | 1.3486  | 1.4826  | 0.1367  | 0.658397 |
| <i>Cyb5b</i>         | chr8:107150660-107187470  | 28.0322 | 26.8620 | -0.0615 | 0.224799 |
| <i>Pkd1l3</i>        | chr8:109614516-109672592  | 3.5384  | 3.3428  | -0.0820 | 0.393109 |
| <i>Pdpr</i>          | chr8:111094629-111137074  | 19.8504 | 19.0140 | -0.0621 | 0.330620 |
| <i>Tmem170</i>       | chr8:111864897-111876675  | 2.5619  | 2.3372  | -0.1324 | 0.507175 |
| <i>Kbtbd3</i>        | chr9:4309742-4331721      | 3.7829  | 3.9684  | 0.0691  | 0.611172 |
| <i>Qtrt1</i>         | chr9:21411836-21420277    | 23.1715 | 24.0968 | 0.0565  | 0.755255 |
| <i>Ubash3b</i>       | chr9:41011097-41161697    | 9.5205  | 9.7693  | 0.0372  | 0.743205 |
| <i>H2afx</i>         | chr9:44334714-44336071    | 17.3452 | 18.3165 | 0.0786  | 0.749319 |
| <i>Slc37a4</i>       | chr9:44398175-44402963    | 13.1010 | 12.3149 | -0.0893 | 0.467663 |
| <i>Pstpip1</i>       | chr9:56089961-56128888    | 44.2639 | 45.0390 | 0.0250  | 0.733304 |
| <i>Tle3</i>          | chr9:61372365-61418497    | 18.7002 | 17.7197 | -0.0777 | 0.544711 |
| <i>Snpc5</i>         | chr9:64179296-64182684    | 35.9661 | 33.8443 | -0.0877 | 0.476337 |
| <i>Pdcd7</i>         | chr9:65346067-65359642    | 14.6488 | 13.9979 | -0.0656 | 0.065610 |
| <i>Ddx43</i>         | chr9:78395776-78423587    | 1.2466  | 1.3511  | 0.1162  | 0.519226 |
| <i>Atr</i>           | chr9:95857596-95951644    | 23.4691 | 22.3588 | -0.0699 | 0.478945 |
| <i>Dusp7</i>         | chr9:106368631-106375724  | 15.6230 | 14.8120 | -0.0769 | 0.517403 |
| <i>Elp6</i>          | chr9:110305191-110322092  | 3.8139  | 3.4983  | -0.1246 | 0.470587 |
| <i>Cln5</i>          | chrX:7153809-7319358      | 0.8038  | 0.8528  | 0.0853  | 0.690750 |
| <i>Ppp1r3fos</i>     | chrX:7573599-7581015      | 1.4815  | 1.3378  | -0.1472 | 0.568687 |
| <i>A230072C01Rik</i> | chrX:20961683-20986737    | 3.5059  | 3.7384  | 0.0926  | 0.583855 |
| <i>Tmem255a</i>      | chrX:38196572-38252439    | 1.0831  | 1.1807  | 0.1246  | 0.697567 |
| <i>Gm4987</i>        | chrX:46455886-46456294    | 9.9680  | 10.8532 | 0.1227  | 0.634086 |
| <i>Gm14680</i>       | chrX:62775150-62776742    | 0.7107  | 0.8056  | 0.1809  | 0.413849 |
| <i>Mttr1</i>         | chrX:71364759-71419196    | 21.5940 | 20.6334 | -0.0656 | 0.338627 |
| <i>Gm14780</i>       | chrX:93527572-93530309    | 0.3717  | 0.4356  | 0.2290  | 0.627281 |
| <i>Zc4h2</i>         | chrX:95639192-95658509    | 1.7277  | 1.5496  | -0.1570 | 0.516645 |
| <i>Taf1</i>          | chrX:101532733-101601789  | 24.1259 | 23.1226 | -0.0613 | 0.284965 |
| <i>Gm6206</i>        | chrX:103162893-103165427  | 1.2386  | 1.3557  | 0.1303  | 0.633528 |
| <i>Plp1</i>          | chrX:136822670-136839733  | 0.9418  | 0.9993  | 0.0856  | 0.569801 |
| <i>Tbc1d8b</i>       | chrX:139684995-139753405  | 5.6956  | 5.3536  | -0.0893 | 0.564817 |
| <i>Wdr70</i>         | chr15:7873054-8099209     | 9.8347  | 10.1203 | 0.0413  | 0.604678 |
| <i>Z410089E03Rik</i> | chr15:8169105-8271158     | 4.4429  | 4.2103  | -0.0776 | 0.494717 |
| <i>Emc2</i>          | chr15:43477228-43527777   | 42.0596 | 43.4135 | 0.0457  | 0.719655 |
| <i>Mtbp</i>          | chr15:55557407-55626423   | 4.6024  | 4.7055  | 0.0320  | 0.614080 |
| <i>D15Ert621e</i>    | chr15:58415467-58457801   | 20.6496 | 20.8994 | 0.0173  | 0.684035 |
| <i>Ndufb9</i>        | chr15:58933809-58939489   | 79.5529 | 82.8365 | 0.0584  | 0.731030 |
| <i>Fam83h</i>        | chr15:76001092-76014336   | 0.3632  | 0.4080  | 0.1677  | 0.410741 |
| <i>Zfp7</i>          | chr15:76879258-76892392   | 20.8851 | 19.9023 | -0.0695 | 0.342285 |
| <i>L3mbtl2</i>       | chr15:81663888-81688315   | 9.8481  | 10.0498 | 0.0292  | 0.694536 |
| <i>Ttll12</i>        | chr15:83575118-83595157   | 9.6093  | 8.9945  | -0.0954 | 0.597372 |
| <i>Celsr1</i>        | chr15:85898757-86033777   | 11.2638 | 10.4487 | -0.1084 | 0.645548 |
| <i>Il17rb</i>        | chr14:29996140-30008896   | 1.6142  | 1.7145  | 0.0870  | 0.389909 |
| <i>Cacna1d</i>       | chr14:30039948-300491156  | 0.1215  | 0.1373  | 0.1764  | 0.405870 |
| <i>Oxnad1</i>        | chr14:32085373-32103202   | 4.4828  | 4.6014  | 0.0377  | 0.603449 |
| <i>Glud1</i>         | chr14:34310726-34345144   | 57.8744 | 58.5064 | 0.0157  | 0.773247 |
| <i>Gm15765</i>       | chr14:45211522-45212432   | 0.8447  | 0.9859  | 0.2231  | 0.512137 |
| <i>Gpr137c</i>       | chr14:45219718-45281230   | 0.4899  | 0.4242  | -0.2078 | 0.457044 |
| <i>Apex1</i>         | chr14:50924967-50927139   | 45.2702 | 46.3881 | 0.0352  | 0.689299 |
| <i>Rpgrip1</i>       | chr14:52110703-52163546   | 8.3012  | 7.9699  | -0.0588 | 0.250912 |
| <i>Trav12-3</i>      | chr14:53621656-53622243   | 4.1390  | 3.5714  | -0.2128 | 0.463235 |
| <i>Trav14-3</i>      | chr14:53763082-53765043   | 1.9983  | 1.7508  | -0.1908 | 0.468714 |
| <i>Gm20521</i>       | chr14:54883440-54898137   | 64.3233 | 60.6871 | -0.0840 | 0.546253 |
| <i>Mttr6</i>         | chr14:60265204-60302370   | 35.4328 | 36.2749 | 0.0339  | 0.704602 |
| <i>Mir15a</i>        | chr14:61632026-61632110   | 12.2284 | 9.9969  | -0.2907 | 0.493001 |
| <i>Ints6</i>         | chr14:62676329-62761112   | 24.1238 | 22.9984 | -0.0689 | 0.411076 |
| <i>Elp3</i>          | chr14:65530445-65593112   | 28.0220 | 28.4232 | 0.0205  | 0.693964 |
| <i>Ccdc25</i>        | chr14:65837301-65866604   | 19.5755 | 18.5401 | -0.0784 | 0.461308 |
| <i>Pcca</i>          | chr14:122534323-122891100 | 8.5143  | 8.7267  | 0.0356  | 0.682588 |
| <i>Rps6ka2</i>       | chr17:7170114-7303313     | 0.8796  | 0.9469  | 0.1064  | 0.650013 |
| <i>NA</i>            | chr17:17374331-17394898   | 18.0154 | 17.2283 | -0.0645 | 0.224028 |
| <i>Zfp51</i>         | chr17:21450351-21465591   | 27.1974 | 27.9574 | 0.0398  | 0.719702 |
| <i>Rab26</i>         | chr17:24527240-24534210   | 1.4627  | 1.3257  | -0.1419 | 0.417324 |
| <i>Snhg9</i>         | chr17:24719530-24719965   | 4.7700  | 3.9997  | -0.2541 | 0.093909 |
| <i>Ggnbp1</i>        | chr17:26973216-27036378   | 15.6209 | 14.9326 | -0.0650 | 0.357774 |
| <i>Rps2-ps9</i>      | chr17:27784426-27785243   | 1.4545  | 1.6865  | 0.2135  | 0.615974 |
| <i>Snrpc</i>         | chr17:27839973-27851968   | 3.3192  | 3.4248  | 0.0452  | 0.635568 |

|                   |                          |           |           |         |          |
|-------------------|--------------------------|-----------|-----------|---------|----------|
| <i>Ppil1</i>      | chr17:29250802-29264158  | 12.1496   | 11.4543   | -0.0850 | 0.470674 |
| <i>Zfp799</i>     | chr17:32815454-32822200  | 6.3882    | 6.0868    | -0.0697 | 0.269513 |
| <i>Zfp763</i>     | chr17:33016862-33033402  | 7.3945    | 6.9028    | -0.0993 | 0.502739 |
| <i>BC033916</i>   | chr17:33905134-33906675  | 2.7883    | 4.2362    | 0.6034  | 0.446211 |
| <i>Tap1</i>       | chr17:34187552-34197225  | 80.3009   | 76.2621   | -0.0745 | 0.526535 |
| <i>Agpat1</i>     | chr17:34604261-34613449  | 17.1104   | 16.2311   | -0.0761 | 0.476289 |
| <i>Gm10501</i>    | chr17:34976898-34981788  | 2.0547    | 1.8796    | -0.1285 | 0.396668 |
| <i>Ppp1r18os</i>  | chr17:35860917-35866886  | 2.6219    | 2.9235    | 0.1571  | 0.601551 |
| <i>Mir1894</i>    | chr17:35917888-35917969  | 96.2433   | 101.0334  | 0.0701  | 0.551605 |
| <i>BC023719</i>   | chr17:36111425-36117121  | 3.1800    | 2.8480    | -0.1591 | 0.247173 |
| <i>Bysl</i>       | chr17:47599330-47611492  | 18.2327   | 17.3436   | -0.0721 | 0.460425 |
| <i>Plin4</i>      | chr17:56100590-56109802  | 0.3977    | 0.4451    | 0.1626  | 0.653522 |
| <i>Gpatch11</i>   | chr17:78835515-78848299  | 8.5480    | 8.0505    | -0.0865 | 0.485482 |
| <i>Zfp174</i>     | chr16:3847267-3858880    | 1.0743    | 1.1360    | 0.0806  | 0.680750 |
| <i>Mgrn1</i>      | chr16:4886099-4938296    | 8.7838    | 8.3182    | -0.0786 | 0.436338 |
| <i>Ubn1</i>       | chr16:5050067-5086285    | 33.3976   | 32.0182   | -0.0609 | 0.372360 |
| <i>Dexi</i>       | chr16:10530206-10543054  | 9.8696    | 9.1881    | -0.1032 | 0.509718 |
| <i>Dgcr14</i>     | chr16:17900710-17911348  | 15.1520   | 15.5948   | 0.0416  | 0.743054 |
| <i>Vwa5b2</i>     | chr16:20589470-20605377  | 0.1463    | 0.1668    | 0.1886  | 0.591480 |
| <i>Gm15696</i>    | chr16:31970361-31970806  | 1.6245    | 2.0395    | 0.3282  | 0.683797 |
| <i>Pak2</i>       | chr16:32016289-32079342  | 48.7255   | 46.7695   | -0.0591 | 0.355349 |
| <i>Tnk2os</i>     | chr16:32665222-32668197  | 1.4756    | 1.2809    | -0.2042 | 0.560353 |
| <i>Fbxo40</i>     | chr16:36963459-36990467  | 0.7467    | 0.6736    | -0.1486 | 0.479318 |
| <i>NA</i>         | chr16:43620876-43623955  | 2.9006    | 3.1167    | 0.1037  | 0.729815 |
| <i>Bbx</i>        | chr16:50191843-50432390  | 9.1611    | 8.8092    | -0.0565 | 0.192153 |
| <i>Stx19</i>      | chr16:62814675-62824346  | 0.6936    | 0.5941    | -0.2233 | 0.608980 |
| <i>Rwdd2b</i>     | chr16:87433406-87440573  | 7.7169    | 7.2816    | -0.0838 | 0.155171 |
| <i>Bach1</i>      | chr16:87698944-87733346  | 11.1174   | 10.6531   | -0.0615 | 0.125382 |
| <i>Dnajc28</i>    | chr16:91614256-91619026  | 2.6310    | 2.4163    | -0.1228 | 0.529083 |
| <i>NA</i>         | chr16:92078061-92083808  | 5.9092    | 5.2281    | -0.1767 | 0.615883 |
| <i>Ttc3</i>       | chr16:94370617-94469222  | 24.7617   | 25.2721   | 0.0294  | 0.710555 |
| <i>Gm23692</i>    | chr16:94429072-94429232  | 4.7943    | 5.6363    | 0.2334  | 0.492776 |
| <i>Cdk2ap2</i>    | chr19:4097181-4099019    | 75.4248   | 70.7354   | -0.0926 | 0.584472 |
| <i>Klc2</i>       | chr19:5107745-5118560    | 3.5579    | 3.6849    | 0.0506  | 0.601933 |
| <i>Sipa1</i>      | chr19:5651184-5663707    | 54.7619   | 56.0758   | 0.0342  | 0.759949 |
| <i>Malat1</i>     | chr19:5795689-5802672    | 1735.8982 | 1764.8875 | 0.0239  | 0.781797 |
| <i>Bad</i>        | chr19:6941860-6951898    | 7.4687    | 7.7688    | 0.0568  | 0.645942 |
| <i>Vegfb</i>      | chr19:6982472-6987651    | 3.2122    | 3.4099    | 0.0862  | 0.427739 |
| <i>Otub1</i>      | chr19:7198201-7206316    | 31.0057   | 31.6779   | 0.0309  | 0.720107 |
| <i>Incenp</i>     | chr19:9872296-9899533    | 10.1236   | 10.4731   | 0.0490  | 0.738825 |
| <i>Tmem2</i>      | chr19:21778341-21858327  | 0.7158    | 0.7915    | 0.1451  | 0.726255 |
| <i>Plgrkt</i>     | chr19:29348598-29367390  | 44.8261   | 42.7895   | -0.0671 | 0.457503 |
| <i>Hectd2</i>     | chr19:36554638-36621135  | 1.5175    | 1.4007    | -0.1156 | 0.572004 |
| <i>Aldh18a1</i>   | chr19:40550256-40588463  | 22.3516   | 21.3660   | -0.0651 | 0.272272 |
| <i>Zfp518a</i>    | chr19:40894704-40917947  | 19.4416   | 19.9248   | 0.0354  | 0.730461 |
| <i>Arfgef1</i>    | chr1:10137570-10232670   | 19.4277   | 19.9793   | 0.0404  | 0.777238 |
| <i>Gm26348</i>    | chr1:10166538-10166778   | 5.5906    | 4.6004    | -0.2812 | 0.573774 |
| <i>Rpl7</i>       | chr1:16101294-16104662   | 247.1509  | 258.4906  | 0.0647  | 0.744284 |
| <i>Hs6st1</i>     | chr1:36068399-36106446   | 8.2457    | 7.7684    | -0.0860 | 0.486799 |
| <i>Tmem131</i>    | chr1:36792190-36939527   | 13.7111   | 14.2252   | 0.0531  | 0.766592 |
| <i>AI597479</i>   | chr1:43098709-43115947   | 11.5655   | 11.8788   | 0.0386  | 0.691452 |
| <i>Eef1b2</i>     | chr1:63176824-63180486   | 271.7987  | 254.1183  | -0.0970 | 0.612491 |
| <i>Rpl10a-ps1</i> | chr1:64993923-64994631   | 16.0164   | 17.0544   | 0.0906  | 0.704501 |
| <i>Kansl1l</i>    | chr1:66719247-66817562   | 8.2270    | 8.4691    | 0.0418  | 0.696792 |
| <i>Rpl37a</i>     | chr1:72711259-72713809   | 113.7828  | 119.8450  | 0.0749  | 0.751197 |
| <i>Rqcd1</i>      | chr1:74506057-74530844   | 14.8745   | 15.1323   | 0.0248  | 0.594181 |
| <i>Wdfy1</i>      | chr1:79702261-79776143   | 4.2011    | 3.9888    | -0.0748 | 0.366388 |
| <i>Rhbdd1</i>     | chr1:82316451-82445366   | 9.9920    | 9.4936    | -0.0738 | 0.400330 |
| <i>Snord82</i>    | chr1:86356260-86356330   | 18.6243   | 21.5781   | 0.2124  | 0.687639 |
| <i>Traf3ip1</i>   | chr1:91494667-91529303   | 5.0791    | 5.2481    | 0.0472  | 0.603036 |
| <i>Ing5</i>       | chr1:93803964-93822101   | 21.2945   | 20.4341   | -0.0595 | 0.154182 |
| <i>Gm22710</i>    | chr1:118459140-118459265 | 14.7192   | 12.5493   | -0.2301 | 0.604850 |
| <i>NA</i>         | chr1:119526424-119528224 | 19.7147   | 18.6927   | -0.0768 | 0.349316 |
| <i>Zbed6</i>      | chr1:133619939-133661318 | 24.6893   | 25.4519   | 0.0439  | 0.762762 |
| <i>Ncf2</i>       | chr1:152807889-152836990 | 1.8984    | 2.0552    | 0.1145  | 0.726112 |
| <i>Tnn</i>        | chr1:160085035-160153580 | 0.1115    | 0.1397    | 0.3258  | 0.700545 |
| <i>Gm23212</i>    | chr1:161036681-161036741 | 332.6930  | 343.9338  | 0.0479  | 0.722784 |
| <i>Uap1</i>       | chr1:170141937-170174957 | 9.3328    | 9.6114    | 0.0424  | 0.703729 |
| <i>Dusp12</i>     | chr1:170873497-170885540 | 7.9208    | 7.5010    | -0.0786 | 0.275175 |
| <i>Ppox</i>       | chr1:171275989-171281186 | 11.7896   | 11.2677   | -0.0653 | 0.246601 |
| <i>Slamf1</i>     | chr1:171767126-171801184 | 6.3289    | 5.9238    | -0.0954 | 0.461030 |

|                      |                          |          |          |         |          |
|----------------------|--------------------------|----------|----------|---------|----------|
| <i>Dcaf8</i>         | chr1:172148014-172196393 | 51.6374  | 52.3537  | 0.0199  | 0.738558 |
| <i>Fh1</i>           | chr1:175600373-175625635 | 12.3684  | 11.7720  | -0.0713 | 0.307635 |
| <i>Cd46</i>          | chr1:195041284-195092248 | 2.8322   | 2.6190   | -0.1129 | 0.438512 |
| <i>Rock1</i>         | chr18:10064400-10181792  | 51.9091  | 52.9153  | 0.0277  | 0.717041 |
| <i>3110002H16Rik</i> | chr18:12168716-12189997  | 22.2581  | 21.3178  | -0.0623 | 0.312499 |
| <i>Gm26823</i>       | chr18:31859081-31861764  | 1.2503   | 1.3914   | 0.1542  | 0.713779 |
| <i>0610009O20Rik</i> | chr18:38250248-38262629  | 16.4118  | 15.6333  | -0.0701 | 0.399465 |
| <i>Napg</i>          | chr18:62977835-62999450  | 14.9689  | 14.3364  | -0.0623 | 0.140966 |
| <i>Rttn</i>          | chr18:88971789-89131013  | 7.5075   | 7.1015   | -0.0802 | 0.491779 |
| <i>Fbxo18</i>        | chr2:11742572-11777582   | 13.2265  | 13.4356  | 0.0226  | 0.691420 |
| <i>Trdmt1</i>        | chr2:13509013-13544664   | 3.9243   | 3.6939   | -0.0873 | 0.189957 |
| <i>Qsox2</i>         | chr2:26208636-26237525   | 5.4033   | 5.5486   | 0.0383  | 0.646936 |
| <i>Gm13563</i>       | chr2:26381525-26389018   | 36.1718  | 36.9051  | 0.0290  | 0.684457 |
| <i>Gm20532</i>       | chr2:26586638-26635634   | 1.7215   | 1.4845   | -0.2136 | 0.391116 |
| <i>Dolk</i>          | chr2:30284228-30286354   | 6.7362   | 6.2947   | -0.0978 | 0.377744 |
| <i>Ptges2</i>        | chr2:32395895-32402739   | 6.5583   | 6.8121   | 0.0548  | 0.627500 |
| <i>Phf19</i>         | chr2:34893756-34914026   | 0.8602   | 0.9168   | 0.0920  | 0.548279 |
| <i>Phospho2</i>      | chr2:69789622-69800005   | 11.0551  | 11.4030  | 0.0447  | 0.696286 |
| <i>Hspe1-ps5</i>     | chr2:72955897-72956194   | 9.8560   | 10.7929  | 0.1310  | 0.611320 |
| <i>Gm13689</i>       | chr2:80549711-80550396   | 1.0694   | 1.2573   | 0.2336  | 0.320372 |
| <i>Nup35</i>         | chr2:80617235-80658906   | 3.9602   | 3.7152   | -0.0921 | 0.378449 |
| <i>Atg13</i>         | chr2:91674617-91710576   | 6.3957   | 6.5406   | 0.0323  | 0.628636 |
| <i>D930015M05Rik</i> | chr2:92408891-92432308   | 1.4959   | 1.7065   | 0.1900  | 0.640603 |
| <i>Ext2</i>          | chr2:93695630-93822568   | 8.3796   | 7.9638   | -0.0734 | 0.441209 |
| <i>Ccdc73</i>        | chr2:104867804-105017904 | 2.5098   | 2.3277   | -0.1087 | 0.524373 |
| <i>Ppip5k1</i>       | chr2:121310560-121355396 | 1.0629   | 1.0972   | 0.0458  | 0.147695 |
| <i>Atrn</i>          | chr2:130906494-131030333 | 7.1804   | 6.8203   | -0.0742 | 0.534659 |
| <i>Gm14233</i>       | chr2:131298544-131299835 | 8.0851   | 8.7259   | 0.1100  | 0.514312 |
| <i>Gm14284</i>       | chr2:131322087-131322366 | 2.5464   | 3.1723   | 0.3171  | 0.671531 |
| <i>Tmx4</i>          | chr2:134594184-134644145 | 6.8981   | 6.5770   | -0.0688 | 0.427469 |
| <i>Tbc1d20</i>       | chr2:152293827-152313996 | 23.1154  | 22.2079  | -0.0578 | 0.182108 |
| <i>Rbck1</i>         | chr2:152316333-152332653 | 40.7445  | 38.8712  | -0.0679 | 0.479628 |
| <i>1110008F13Rik</i> | chr2:156863127-156873563 | 31.1894  | 29.7141  | -0.0699 | 0.391384 |
| <i>Rbl1</i>          | chr2:157145892-157204534 | 18.0889  | 18.5314  | 0.0349  | 0.768340 |
| <i>Ralgapb</i>       | chr2:158409847-158499253 | 16.7638  | 16.0257  | -0.0650 | 0.431507 |
| <i>Mocs3</i>         | chr2:168230621-168232302 | 8.2126   | 7.6751   | -0.0977 | 0.456363 |
| <i>Zfp831</i>        | chr2:174643533-174710832 | 13.7509  | 14.1252  | 0.0387  | 0.760093 |
| <i>Gm14399</i>       | chr2:175129492-175142012 | 0.6247   | 0.7197   | 0.2042  | 0.606098 |
| <i>Gm14410</i>       | chr2:177183452-177206421 | 3.2737   | 3.4315   | 0.0679  | 0.588932 |
| <i>Ythdf1</i>        | chr2:180904376-180920949 | 23.9797  | 22.9140  | -0.0656 | 0.299653 |
| <i>Tpd52l2</i>       | chr2:181497164-181517966 | 11.8743  | 11.2173  | -0.0821 | 0.476388 |
| <i>Gm21958</i>       | chr3:54713175-54714353   | 7.0377   | 7.6529   | 0.1209  | 0.693497 |
| <i>Kpna4</i>         | chr3:69067148-69127113   | 28.6509  | 27.4002  | -0.0644 | 0.434392 |
| <i>Gm1647</i>        | chr3:69131232-69157177   | 2.5107   | 2.7730   | 0.1434  | 0.403070 |
| <i>Iqgap3</i>        | chr3:88082050-88121048   | 0.2329   | 0.2715   | 0.2217  | 0.672727 |
| <i>Flad1</i>         | chr3:89401003-89411870   | 11.4406  | 10.9172  | -0.0676 | 0.198669 |
| <i>Gm15265</i>       | chr3:94998799-95004869   | 21.8280  | 20.5680  | -0.0858 | 0.463248 |
| <i>Psmc4</i>         | chr3:95032693-95042614   | 48.9070  | 46.2321  | -0.0811 | 0.483520 |
| <i>Gm15886</i>       | chr3:103771951-103789402 | 47.8118  | 49.2997  | 0.0442  | 0.735982 |
| <i>Rsbn1</i>         | chr3:103914119-103966636 | 22.0032  | 22.3449  | 0.0222  | 0.689214 |
| <i>Lamtor5</i>       | chr3:107278857-107284079 | 17.9320  | 16.7908  | -0.0949 | 0.421077 |
| <i>Atxn7l2</i>       | chr3:108202221-108210934 | 3.5110   | 3.3044   | -0.0875 | 0.457156 |
| <i>Nfkb1</i>         | chr3:135584654-135691547 | 61.8593  | 59.5076  | -0.0559 | 0.216669 |
| <i>Sep15</i>         | chr3:144570303-144597680 | 64.3405  | 66.1969  | 0.0410  | 0.743114 |
| <i>Nexn</i>          | chr3:152236985-152266320 | 3.3797   | 3.5693   | 0.0788  | 0.694381 |
| <i>Rbm12b2</i>       | chr4:12089438-12096243   | 15.6273  | 14.8802  | -0.0707 | 0.351554 |
| <i>Zbtb5</i>         | chr4:44991241-45012412   | 6.7161   | 6.3906   | -0.0717 | 0.333231 |
| <i>Fbxo10</i>        | chr4:45034246-45084604   | 1.0927   | 1.0015   | -0.1258 | 0.327305 |
| <i>Nans</i>          | chr4:46489247-46503632   | 13.5943  | 13.8450  | 0.0264  | 0.687012 |
| <i>Susd1</i>         | chr4:59314682-59438633   | 3.3586   | 3.5230   | 0.0689  | 0.712525 |
| <i>Atp6v1g1</i>      | chr4:63544771-63550750   | 19.8678  | 18.4958  | -0.1032 | 0.576741 |
| <i>Gm12953</i>       | chr4:116551739-116552627 | 3.6478   | 3.2468   | -0.1680 | 0.517939 |
| <i>Cdc20</i>         | chr4:118432900-118437352 | 5.7358   | 6.0784   | 0.0837  | 0.723250 |
| <i>Ppt1</i>          | chr4:122836241-122859175 | 26.0602  | 24.8468  | -0.0688 | 0.446028 |
| <i>Lsm10</i>         | chr4:126096622-126098584 | 14.7834  | 15.5065  | 0.0689  | 0.673986 |
| <i>Gm13063</i>       | chr4:132048177-132048961 | 3.2345   | 3.5475   | 0.1333  | 0.587485 |
| <i>Tmem50a</i>       | chr4:134897848-134915024 | 119.8179 | 113.8367 | -0.0739 | 0.469536 |
| <i>Zfp46</i>         | chr4:136284682-136293942 | 6.3240   | 5.9770   | -0.0814 | 0.464762 |
| <i>Spn</i>           | chr4:141467889-141538597 | 4.0639   | 4.2694   | 0.0712  | 0.766628 |
| <i>Rps19-ps3</i>     | chr4:147821776-147822202 | 3.6336   | 3.1450   | -0.2083 | 0.388032 |
| <i>Per3</i>          | chr4:151003651-151044665 | 0.5193   | 0.5648   | 0.1213  | 0.683985 |

|                      |                           |          |          |         |          |
|----------------------|---------------------------|----------|----------|---------|----------|
| <i>Espn</i>          | chr4:152120330-152152371  | 0.4223   | 0.4627   | 0.1319  | 0.587002 |
| <i>Gm16023</i>       | chr4:155608299-155624755  | 8.3149   | 7.8187   | -0.0888 | 0.482404 |
| <i>Mib2</i>          | chr4:155654676-155669198  | 10.7970  | 11.0920  | 0.0389  | 0.713824 |
| <i>Ckap4</i>         | chr10:84526304-84534036   | 0.2868   | 0.3460   | 0.2709  | 0.655378 |
| <i>Ramp3</i>         | chr11:6658520-6677475     | 0.8535   | 1.0093   | 0.2419  | 0.650149 |
| <i>Gm27031</i>       | chr13:95954593-95957171   | 0.3249   | 0.2633   | -0.3031 | 0.395714 |
| <i>Fxyd7</i>         | chr7:31042516-31051462    | 1.0496   | 1.2385   | 0.2387  | 0.493387 |
| <i>Xlr3b</i>         | chrX:73192206-73202930    | 1.1888   | 0.6634   | -0.8416 | 0.553140 |
| <i>Carm1</i>         | chr9:21546893-21589487    | 9.3095   | 8.7917   | -0.0826 | 0.551145 |
| <i>Fam63a</i>        | chr3:95281344-95296166    | 4.2643   | 4.3863   | 0.0407  | 0.690527 |
| <i>Mutyh</i>         | chr4:116807722-116819440  | 6.4064   | 5.9906   | -0.0968 | 0.516837 |
| <i>Zfp595</i>        | chr13:67312997-67332560   | 13.3176  | 13.6802  | 0.0387  | 0.740430 |
| <i>Nt5dc1</i>        | chr10:34288287-34418552   | 22.2201  | 22.5409  | 0.0207  | 0.659902 |
| <i>Prorsd1</i>       | chr11:29511756-29515033   | 7.2238   | 7.4936   | 0.0529  | 0.683588 |
| <i>Kdelc2</i>        | chr9:53384022-53401867    | 0.2777   | 0.2252   | -0.3025 | 0.576992 |
| <i>Trav14-2</i>      | chr14:53640700-53641224   | 9.9075   | 10.5870  | 0.0957  | 0.581825 |
| <i>Klf16bos</i>      | chr2:142902964-142903572  | 2.3421   | 1.9262   | -0.2820 | 0.625269 |
| <i>Plekkg3</i>       | chr12:76533559-76579039   | 1.2326   | 1.1129   | -0.1475 | 0.632453 |
| <i>Kdm4c</i>         | chr4:74242496-74405860    | 19.3761  | 19.6832  | 0.0227  | 0.698916 |
| <i>Mthfd1l</i>       | chr10:3973117-4167081     | 28.9996  | 29.4394  | 0.0217  | 0.733643 |
| <i>Ctdsp2</i>        | chr10:126978716-126999975 | 14.1582  | 13.3120  | -0.0889 | 0.602075 |
| <i>Mars</i>          | chr10:127296220-127311786 | 22.2898  | 22.6472  | 0.0229  | 0.750444 |
| <i>Sel1l</i>         | chr12:91806042-91849157   | 15.1235  | 14.3975  | -0.0710 | 0.534379 |
| <i>Wdr25</i>         | chr12:108894271-109028452 | 1.4115   | 1.4875   | 0.0757  | 0.581905 |
| <i>Idi1</i>          | chr13:8885500-8892451     | 0.6136   | 0.5374   | -0.1913 | 0.569728 |
| <i>Exoc1</i>         | chr5:76529310-76570294    | 11.9057  | 11.3048  | -0.0747 | 0.548163 |
| <i>Erc1</i>          | chr6:119570803-119848150  | 1.5348   | 1.5864   | 0.0477  | 0.662137 |
| <i>Gabarapl1</i>     | chr6:129533199-129542331  | 3.5655   | 3.7548   | 0.0746  | 0.638967 |
| <i>Ube3a</i>         | chr7:59228751-59306727    | 42.0373  | 42.7175  | 0.0232  | 0.728431 |
| <i>Gm17023</i>       | chr8:13076076-13082740    | 6.6927   | 5.9213   | -0.1767 | 0.557142 |
| <i>Dda1</i>          | chr8:71469198-71476098    | 18.2229  | 17.3944  | -0.0671 | 0.420039 |
| <i>Pop1</i>          | chr15:34495303-34530648   | 5.7239   | 5.4013   | -0.0837 | 0.433323 |
| <i>Trav8-1</i>       | chr14:53469755-53470231   | 3.2106   | 2.6778   | -0.2618 | 0.537683 |
| <i>Trav6-7-dv9</i>   | chr14:53709901-53710417   | 2.6464   | 3.0563   | 0.2077  | 0.577454 |
| <i>Gm15556</i>       | chr17:47922377-47923429   | 1.3723   | 1.1249   | -0.2868 | 0.474799 |
| <i>Fam131a</i>       | chr16:20693281-20703048   | 0.4781   | 0.5337   | 0.1586  | 0.488764 |
| <i>Qtrtd1</i>        | chr16:43861406-43926809   | 11.1400  | 10.6247  | -0.0683 | 0.393796 |
| <i>4930556123Rik</i> | chr1:37614258-37615372    | 1.5587   | 1.7953   | 0.2039  | 0.494435 |
| <i>Icos</i>          | chr1:60977926-61000320    | 15.4891  | 14.6176  | -0.0835 | 0.561739 |
| <i>Uck2</i>          | chr1:167226089-167285127  | 55.6093  | 57.4552  | 0.0471  | 0.746252 |
| <i>Sh2d2a</i>        | chr3:87846754-87855722    | 22.4265  | 22.9561  | 0.0337  | 0.773670 |
| <i>Cc2d1b</i>        | chr4:108619939-108634123  | 35.3597  | 35.7335  | 0.0152  | 0.752495 |
| <i>Spryd4</i>        | chr10:128209907-128211794 | 10.0095  | 10.5176  | 0.0714  | 0.729992 |
| <i>Naif1</i>         | chr2:32450456-32456953    | 3.0906   | 3.2242   | 0.0611  | 0.712691 |
| <i>Gm16364</i>       | chr10:39556070-39558062   | 4.5987   | 4.9290   | 0.1001  | 0.709141 |
| <i>Tmem65</i>        | chr15:58782268-58823530   | 5.6335   | 5.8145   | 0.0456  | 0.692180 |
| <i>Clcn1</i>         | chr6:42286684-42315756    | 0.1433   | 0.1681   | 0.2302  | 0.579404 |
| <i>Emb</i>           | chr13:117220624-117274098 | 186.2430 | 189.2451 | 0.0231  | 0.747623 |
| <i>Spp13</i>         | chr5:115011136-115098790  | 11.7990  | 11.1265  | -0.0847 | 0.585399 |
| <i>Arlgip4</i>       | chr5:124116088-124118196  | 25.9092  | 24.4275  | -0.0850 | 0.521607 |
| <i>Sec23b</i>        | chr2:144556228-144590749  | 14.4720  | 14.7108  | 0.0236  | 0.686484 |
| <i>Ash1l</i>         | chr3:88965811-89079373    | 22.4204  | 22.9712  | 0.0350  | 0.780073 |
| <i>Hint3</i>         | chr10:30608140-30618479   | 11.7472  | 10.9306  | -0.1039 | 0.541939 |
| <i>Zfp873</i>        | chr10:82058416-82061329   | 9.2877   | 8.6136   | -0.1087 | 0.594089 |
| <i>Zcchc10</i>       | chr11:53324678-53333301   | 3.1371   | 3.3281   | 0.0852  | 0.583454 |
| <i>Hint1</i>         | chr11:54866382-54870501   | 98.7942  | 103.1283 | 0.0619  | 0.747053 |
| <i>Gm12319</i>       | chr11:70654740-70656493   | 27.8038  | 25.8728  | -0.1038 | 0.466037 |
| <i>Spns2</i>         | chr11:72451637-72489904   | 0.3554   | 0.3051   | -0.2200 | 0.549288 |
| <i>Gm26563</i>       | chr11:80017353-80029868   | 6.6137   | 6.2449   | -0.0828 | 0.475478 |
| <i>Gm4787</i>        | chr12:81376990-81379464   | 0.7831   | 0.6780   | -0.2079 | 0.594436 |
| <i>Gm17193</i>       | chr12:84922541-84923512   | 2.5655   | 2.2492   | -0.1899 | 0.439103 |
| <i>Sp4</i>           | chr12:118234932-118301440 | 39.4050  | 39.8821  | 0.0174  | 0.731463 |
| <i>Marvel2</i>       | chr13:100595956-100616971 | 1.3213   | 1.4036   | 0.0871  | 0.604615 |
| <i>6030443J06Rik</i> | chr5:22550436-22807850    | 0.6165   | 0.5583   | -0.1430 | 0.564054 |
| <i>Fam193a</i>       | chr5:34369932-34486456    | 11.2371  | 11.5732  | 0.0425  | 0.767170 |
| <i>4930515G01Rik</i> | chr5:114773736-114774983  | 3.0772   | 3.3030   | 0.1022  | 0.646430 |
| <i>Trbv3</i>         | chr6:41048393-41048824    | 104.0612 | 97.6430  | -0.0918 | 0.564959 |
| <i>5430402O13Rik</i> | chr6:50566642-50594865    | 2.0886   | 1.8573   | -0.1693 | 0.281188 |
| <i>Tmem43</i>        | chr6:91473702-91488459    | 20.0862  | 20.4173  | 0.0236  | 0.701604 |
| <i>Phb2</i>          | chr6:124712335-124716950  | 46.8065  | 47.3792  | 0.0175  | 0.730344 |
| <i>Arhgdib</i>       | chr6:136923522-136941899  | 373.3905 | 385.7700 | 0.0471  | 0.763750 |



|                      |                           |         |         |         |          |
|----------------------|---------------------------|---------|---------|---------|----------|
| <i>Crebzf</i>        | chr7:90442728-90447717    | 63.6783 | 61.5193 | -0.0498 | 0.150922 |
| <i>Stim1</i>         | chr7:102267823-102436848  | 35.5576 | 36.1506 | 0.0239  | 0.786836 |
| <i>Gm4070</i>        | chr7:105895138-105953967  | 1.8282  | 1.6537  | -0.1447 | 0.673229 |
| <i>Mob2</i>          | chr7:142008552-142061034  | 28.9608 | 29.5916 | 0.0311  | 0.700051 |
| <i>Lrp2bp</i>        | chr8:45999302-46029477    | 0.5040  | 0.4414  | -0.1914 | 0.589381 |
| <i>Lrrc29</i>        | chr8:105312340-105326276  | 2.4847  | 2.6421  | 0.0886  | 0.670511 |
| <i>Acd</i>           | chr8:105698158-105701095  | 14.8710 | 14.0203 | -0.0850 | 0.514473 |
| <i>Hsbp1</i>         | chr8:119344537-119348927  | 36.2531 | 37.3360 | 0.0425  | 0.726156 |
| <i>Zfp810</i>        | chr9:22276747-22307638    | 11.9004 | 12.1972 | 0.0355  | 0.739303 |
| <i>Pus3</i>          | chr9:35558594-35567183    | 33.8561 | 35.0292 | 0.0491  | 0.758930 |
| <i>Hyls1</i>         | chr9:35560819-35570103    | 23.2914 | 23.9407 | 0.0397  | 0.756000 |
| <i>Timm8b</i>        | chr9:50603900-50605320    | 36.1010 | 37.2886 | 0.0467  | 0.672540 |
| <i>Gm17200</i>       | chr9:123678095-123701046  | 6.1786  | 5.6976  | -0.1169 | 0.578775 |
| <i>Rap2c</i>         | chrX:51003911-51018018    | 22.6903 | 23.2030 | 0.0322  | 0.717534 |
| <i>Zfp275</i>        | chrX:73342620-73359080    | 15.0941 | 14.5011 | -0.0578 | 0.242841 |
| <i>Zrsr2</i>         | chrX:163935442-163958661  | 9.1271  | 9.2998  | 0.0270  | 0.695284 |
| <i>Lrrc14</i>        | chr15:76710622-76717699   | 5.6075  | 5.3026  | -0.0807 | 0.483668 |
| <i>Fbln1</i>         | chr15:85205948-85286535   | 0.1958  | 0.2350  | 0.2634  | 0.674154 |
| <i>Trav14-1</i>      | chr14:53554056-53554554   | 22.4696 | 20.6940 | -0.1188 | 0.487042 |
| <i>Qpct</i>          | chr17:79051905-79090243   | 4.5552  | 4.7476  | 0.0597  | 0.669379 |
| <i>Ccdc14</i>        | chr16:34690615-34725194   | 2.5016  | 2.6007  | 0.0560  | 0.540077 |
| <i>Pitpnm1</i>       | chr19:4099997-4113965     | 34.8445 | 33.0488 | -0.0763 | 0.576347 |
| <i>Yif1a</i>         | chr19:5088537-5092879     | 14.4510 | 14.8940 | 0.0436  | 0.720303 |
| <i>Prpf19</i>        | chr19:10888155-10909559   | 18.1195 | 17.2588 | -0.0702 | 0.455883 |
| <i>Gm20407</i>       | chr19:27994196-27995693   | 2.1473  | 2.3987  | 0.1598  | 0.381048 |
| <i>Ar13</i>          | chr19:46531108-46573085   | 9.7576  | 10.2466 | 0.0706  | 0.638481 |
| <i>2810408111Rik</i> | chr1:64679870-64690659    | 1.6386  | 1.4220  | -0.2045 | 0.470788 |
| <i>Cnppd1</i>        | chr1:75134553-75142368    | 34.4664 | 35.0530 | 0.0243  | 0.762945 |
| <i>Ilkap</i>         | chr1:91375830-91398783    | 62.8328 | 60.2502 | -0.0606 | 0.297206 |
| <i>A330023F24Rik</i> | chr1:194976374-195037908  | 2.0953  | 2.2143  | 0.0797  | 0.782172 |
| <i>Rapgef1</i>       | chr2:29619719-29740978    | 27.1003 | 25.9220 | -0.0641 | 0.489645 |
| <i>H13</i>           | chr2:152669460-152708670  | 21.8886 | 22.1145 | 0.0148  | 0.741107 |
| <i>Acss2</i>         | chr2:155517947-155585724  | 12.8926 | 12.2789 | -0.0704 | 0.505056 |
| <i>Ejf2</i>          | chr3:51255664-51340644    | 49.1392 | 49.7027 | 0.0164  | 0.683858 |
| <i>Nhlrc3</i>        | chr3:53448587-53463323    | 8.1660  | 7.7670  | -0.0723 | 0.409407 |
| <i>Ubqln4</i>        | chr3:88553715-88569725    | 15.9151 | 16.4249 | 0.0455  | 0.753343 |
| <i>Gdap2</i>         | chr3:100162380-100206981  | 10.1566 | 9.6771  | -0.0698 | 0.330031 |
| <i>Trim33</i>        | chr3:103279292-103358768  | 22.8272 | 21.9154 | -0.0588 | 0.369570 |
| <i>Cdc14a</i>        | chr3:116272552-116424032  | 3.3259  | 3.3917  | 0.0283  | 0.679515 |
| <i>Gm10306</i>       | chr4:94556545-94557078    | 2.5629  | 2.8981  | 0.1774  | 0.589629 |
| <i>AA415398</i>      | chr4:119530307-119539529  | 2.2086  | 2.0223  | -0.1272 | 0.535663 |
| <i>Kpna6</i>         | chr4:129643979-129672767  | 11.7724 | 11.3191 | -0.0566 | 0.220668 |
| <i>Ythdf2</i>        | chr4:132184911-132212303  | 22.4969 | 21.6159 | -0.0576 | 0.198648 |
| <i>Nipal3</i>        | chr4:135446136-135495038  | 17.7081 | 16.9441 | -0.0636 | 0.452161 |
| <i>Dhrs3</i>         | chr4:144892826-144928209  | 0.4091  | 0.3505  | -0.2228 | 0.369529 |
| <i>Mliip</i>         | chr4:147860777-147868816  | 21.6085 | 22.0142 | 0.0268  | 0.760148 |
| <i>Tmprss2</i>       | chr16:97564683-97611195   | 0.2496  | 0.3052  | 0.2902  | 0.689044 |
| <i>F420014N23Rik</i> | chr10:127195248-127202643 | 4.1272  | 3.8710  | -0.0925 | 0.170177 |
| <i>Plcg2</i>         | chr8:117498290-117635140  | 2.6082  | 2.3785  | -0.1330 | 0.641471 |
| <i>Fzd5</i>          | chr1:64730559-64737750    | 1.8731  | 1.9799  | 0.0800  | 0.779401 |
| <i>Gnai3</i>         | chr3:108107279-108146146  | 78.3446 | 74.7889 | -0.0670 | 0.461049 |
| <i>Cass4</i>         | chr2:172393793-172433757  | 0.5217  | 0.4619  | -0.1756 | 0.576068 |
| <i>Sec61g</i>        | chr11:16500529-16508484   | 1.7924  | 1.9187  | 0.0982  | 0.647583 |
| <i>Igkc</i>          | chr6:70726434-70726757    | 8.4069  | 9.8467  | 0.2281  | 0.745394 |
| <i>Psmc8</i>         | chr7:29174187-29180701    | 93.9155 | 96.9107 | 0.0453  | 0.758547 |
| <i>Snord111</i>      | chr8:110838527-110838616  | 22.2205 | 24.6219 | 0.1480  | 0.557589 |
| <i>Abcb7</i>         | chrX:104280656-104413856  | 18.8124 | 17.9436 | -0.0682 | 0.462418 |
| <i>Kat6b</i>         | chr14:21481433-21672478   | 2.7579  | 2.8162  | 0.0302  | 0.717484 |
| <i>Socs5</i>         | chr17:87107678-87137583   | 5.9969  | 5.6676  | -0.0815 | 0.501420 |
| <i>Gm24453</i>       | chr19:8724867-8724943     | 42.1429 | 37.3132 | -0.1756 | 0.555557 |
| <i>Fbxw4</i>         | chr19:45578253-45660312   | 11.3257 | 10.7489 | -0.0754 | 0.437920 |
| <i>Wdr34</i>         | chr2:30031545-30048881    | 1.0449  | 1.1357  | 0.1203  | 0.521158 |
| <i>Cers6</i>         | chr2:68861440-69114282    | 4.6385  | 4.4070  | -0.0739 | 0.447211 |
| <i>Hdc</i>           | chr2:126593666-126619299  | 0.3198  | 0.2756  | -0.2144 | 0.608659 |
| <i>Ecm1</i>          | chr3:95734146-95739569    | 1.4236  | 1.2670  | -0.1681 | 0.636781 |
| <i>Bach2it1</i>      | chr4:32251760-32265835    | 13.8891 | 14.5861 | 0.0706  | 0.604666 |
| <i>Gm13008</i>       | chr4:136003565-136010937  | 18.2500 | 19.0611 | 0.0627  | 0.659219 |
| <i>Trav6d-4</i>      | chr14:52753366-52753844   | 2.3480  | 2.7269  | 0.2158  | 0.577856 |
| <i>Trbd2</i>         | chr6:41542162-41542176    | 90.5221 | 75.7343 | -0.2573 | 0.648121 |
| <i>Igsf6</i>         | chr7:121064066-121074530  | 3.1648  | 2.9009  | -0.1256 | 0.583160 |
| <i>Cacna2d2</i>      | chr9:107399611-107529346  | 0.3583  | 0.3899  | 0.1217  | 0.303280 |

|                      |                           |          |          |         |          |
|----------------------|---------------------------|----------|----------|---------|----------|
| <i>Rpl37</i>         | chr15:5116612-5119140     | 181.4306 | 169.1549 | -0.1011 | 0.630414 |
| <i>Rpl31</i>         | chr1:39367850-39371908    | 29.6415  | 27.7101  | -0.0972 | 0.595884 |
| <i>Tmem198</i>       | chr1:75479531-75485705    | 0.8921   | 0.7894   | -0.1763 | 0.542153 |
| <i>Tyro3</i>         | chr2:119797732-119818104  | 0.8392   | 0.7685   | -0.1269 | 0.527256 |
| <i>Cd93</i>          | chr2:148436639-148443563  | 0.4564   | 0.5011   | 0.1348  | 0.681649 |
| <i>Etohi1</i>        | chr2:178023283-178034022  | 9.7095   | 10.0340  | 0.0474  | 0.695605 |
| <i>Actl7a</i>        | chr4:56743421-56744925    | 0.6520   | 0.5500   | -0.2453 | 0.409613 |
| <i>Ccl6</i>          | chr11:83587881-83593087   | 0.4496   | 0.5415   | 0.2685  | 0.731148 |
| <i>NA</i>            | chr16:3908856-3909192     | 8.5873   | 9.3176   | 0.1178  | 0.600478 |
| <i>Gm128</i>         | chr3:95236919-95241598    | 3.9852   | 3.7107   | -0.1030 | 0.461938 |
| <i>Fbrsl1</i>        | chr5:110361753-110448503  | 4.8028   | 4.4768   | -0.1014 | 0.618293 |
| <i>Gm26944</i>       | chr7:92639738-92647442    | 21.5699  | 22.2602  | 0.0454  | 0.653276 |
| <i>Ptpn18</i>        | chr1:34459745-34473775    | 93.7617  | 101.2857 | 0.1114  | 0.660621 |
| <i>Me2</i>           | chr18:73770039-73815392   | 62.5762  | 63.2243  | 0.0149  | 0.678167 |
| <i>Usp6nl</i>        | chr2:6322666-6446390      | 3.3858   | 3.2065   | -0.0785 | 0.512367 |
| <i>Mcts2</i>         | chr2:152687147-152687940  | 11.5533  | 12.2716  | 0.0870  | 0.724194 |
| <i>Gm12531</i>       | chr3:37052214-37060035    | 12.9833  | 11.9831  | -0.1157 | 0.468820 |
| <i>Ssbp3</i>         | chr4:106910700-107049694  | 10.4768  | 9.9593   | -0.0731 | 0.507444 |
| <i>Ddx27</i>         | chr2:167015192-167034947  | 27.1960  | 27.8162  | 0.0325  | 0.761851 |
| <i>Utp20</i>         | chr10:88746606-88826814   | 22.2853  | 21.3364  | -0.0628 | 0.444281 |
| <i>Sf3a1</i>         | chr11:4160349-4182541     | 15.8512  | 15.1170  | -0.0684 | 0.518040 |
| <i>Pgam2</i>         | chr11:5801639-5803733     | 6.9258   | 6.4132   | -0.1109 | 0.344065 |
| <i>Tmem107</i>       | chr11:69070805-69073293   | 1.2447   | 1.3650   | 0.1331  | 0.399417 |
| <i>Hexim1</i>        | chr11:103116324-103119725 | 14.4857  | 13.7677  | -0.0733 | 0.499098 |
| <i>Dus4l</i>         | chr12:31640054-31654826   | 6.9399   | 7.1864   | 0.0503  | 0.609541 |
| <i>Sptlc2</i>        | chr12:87305057-87388355   | 14.5682  | 14.8201  | 0.0247  | 0.779248 |
| <i>Nol8</i>          | chr13:49653349-49679015   | 39.4234  | 37.6648  | -0.0658 | 0.463642 |
| <i>Styk1</i>         | chr6:131299143-131353597  | 0.2048   | 0.2396   | 0.2266  | 0.634781 |
| <i>Rec114</i>        | chr9:58652855-58741559    | 3.7026   | 4.0164   | 0.1174  | 0.673597 |
| <i>Chd8</i>          | chr14:52198150-52237791   | 24.9708  | 23.8961  | -0.0635 | 0.505430 |
| <i>Rab2b</i>         | chr14:52261758-52279545   | 5.9089   | 5.6240   | -0.0713 | 0.279555 |
| <i>Trav8-2</i>       | chr14:53738301-53741038   | 1.6211   | 1.4647   | -0.1464 | 0.502261 |
| <i>Mrpl39</i>        | chr16:84717575-84735742   | 17.7353  | 18.2452  | 0.0409  | 0.737927 |
| <i>AW112010</i>      | chr19:11047612-11050566   | 239.5032 | 248.0915 | 0.0508  | 0.773831 |
| <i>Egr1</i>          | chr18:34859822-34864984   | 2.3175   | 2.4082   | 0.0554  | 0.618943 |
| <i>Sh3glb1</i>       | chr3:144688843-144720323  | 30.9466  | 31.3678  | 0.0195  | 0.678396 |
| <i>Gm16008</i>       | chr4:156022007-156031643  | 16.9019  | 17.4916  | 0.0495  | 0.742956 |
| <i>Gngt2</i>         | chr11:95837215-95845734   | 7.2656   | 7.5637   | 0.0580  | 0.709008 |
| <i>Rnf141</i>        | chr7:110800431-110844457  | 4.1060   | 4.2095   | 0.0359  | 0.664329 |
| <i>Mir1898</i>       | chr15:12171491-12171574   | 16.6311  | 18.8472  | 0.1805  | 0.622804 |
| <i>Wiz</i>           | chr17:32354054-32389401   | 1.7679   | 1.8519   | 0.0669  | 0.745881 |
| <i>Vaultrc5</i>      | chr18:36801865-36802008   | 26.3909  | 22.6752  | -0.2189 | 0.683201 |
| <i>Gm17119</i>       | chr3:14564401-14564681    | 4.3691   | 4.8882   | 0.1620  | 0.541641 |
| <i>Dnajb6</i>        | chr5:29735687-29786478    | 6.6754   | 6.7945   | 0.0255  | 0.539920 |
| <i>Lrrc8dos</i>      | chr5:105814772-105818988  | 1.8068   | 2.0559   | 0.1864  | 0.516213 |
| <i>Tmem176b</i>      | chr6:48833810-48841374    | 0.5056   | 0.4291   | -0.2366 | 0.414029 |
| <i>Fam98c</i>        | chr7:29152510-29156234    | 14.0630  | 13.3561  | -0.0744 | 0.464978 |
| <i>Rrp8</i>          | chr7:105732206-105737376  | 17.2072  | 16.4000  | -0.0693 | 0.398057 |
| <i>Polr3k</i>        | chr2:181864336-181870830  | 12.0391  | 11.3747  | -0.0819 | 0.547514 |
| <i>Nasp</i>          | chr4:116601051-116627941  | 12.2043  | 12.4973  | 0.0342  | 0.740540 |
| <i>Efhd2</i>         | chr4:141858141-141874920  | 20.2978  | 21.0436  | 0.0521  | 0.772807 |
| <i>Msra</i>          | chr14:64122622-64455903   | 10.1138  | 9.4716   | -0.0947 | 0.554125 |
| <i>Mapkap1</i>       | chr2:34406770-34624950    | 17.0514  | 16.3434  | -0.0612 | 0.333049 |
| <i>Zfp341</i>        | chr2:154613296-154646821  | 1.4914   | 1.3729   | -0.1194 | 0.283280 |
| <i>1700034H15Rik</i> | chr1:191890232-191907527  | 0.5130   | 0.5508   | 0.1028  | 0.493002 |
| <i>Derl3</i>         | chr10:75893397-75895941   | 1.1272   | 1.2496   | 0.1487  | 0.519198 |
| <i>Plekhm1</i>       | chr11:103365087-103412664 | 6.4358   | 6.0570   | -0.0875 | 0.603695 |
| <i>Rbm33</i>         | chr5:28317120-28419244    | 15.6641  | 16.0158  | 0.0320  | 0.789109 |
| <i>Plat</i>          | chr8:22757743-22782847    | 0.8412   | 0.9397   | 0.1597  | 0.651962 |
| <i>Gsdmd</i>         | chr15:75862338-75867404   | 53.9519  | 51.8136  | -0.0583 | 0.265193 |
| <i>Usp45</i>         | chr4:21767155-21837872    | 13.4188  | 12.8183  | -0.0661 | 0.455815 |
| <i>Gm26896</i>       | chr10:81606367-81609791   | 4.8238   | 4.5000   | -0.1003 | 0.529691 |
| <i>Wfikkn2</i>       | chr11:94235955-94246005   | 1.6636   | 1.9285   | 0.2132  | 0.638847 |
| <i>Taok3</i>         | chr5:117120128-117275219  | 7.4941   | 7.6158   | 0.0232  | 0.771885 |
| <i>Gm15713</i>       | chr16:43410517-43420196   | 1.5142   | 1.6801   | 0.1500  | 0.685541 |
| <i>Ube2f</i>         | chr1:91250310-91288877    | 6.9283   | 6.5606   | -0.0787 | 0.481351 |
| <i>Fanc</i>          | chr13:63304708-63497278   | 4.3758   | 4.1358   | -0.0814 | 0.543517 |
| <i>Atad5</i>         | chr11:80089399-80135794   | 4.0307   | 4.1576   | 0.0447  | 0.784700 |
| <i>Chchd6</i>        | chr6:89383145-89595652    | 1.0716   | 1.2234   | 0.1911  | 0.590444 |
| <i>C230062116Rik</i> | chr7:29953620-29955992    | 1.1037   | 1.1999   | 0.1206  | 0.603690 |
| <i>Tepp</i>          | chr8:95310565-95326323    | 1.7902   | 1.9313   | 0.1095  | 0.482896 |

|                      |                           |         |         |         |          |
|----------------------|---------------------------|---------|---------|---------|----------|
| <i>Spata2l</i>       | chr8:123232254-123236209  | 3.6726  | 3.3945  | -0.1136 | 0.605625 |
| <i>Gm14834</i>       | chrX:107174609-107175494  | 0.9705  | 1.1335  | 0.2239  | 0.571163 |
| <i>6530402F18Rik</i> | chr2:29245106-29253006    | 3.3472  | 3.4634  | 0.0492  | 0.703739 |
| <i>Trak1</i>         | chr9:121366957-121474916  | 8.6885  | 8.9619  | 0.0447  | 0.769026 |
| <i>Mfsd4</i>         | chr1:132022805-132068062  | 19.3698 | 19.8194 | 0.0331  | 0.791020 |
| <i>Afg3l1</i>        | chr8:123477902-123503916  | 7.8990  | 7.4832  | -0.0780 | 0.522088 |
| <i>Dip2b</i>         | chr15:100038663-100219473 | 20.9105 | 19.9701 | -0.0664 | 0.525516 |
| <i>Pbrm1</i>         | chr14:31019137-31121592   | 30.8647 | 29.6388 | -0.0585 | 0.430013 |
| <i>Traj35</i>        | chr14:54183773-54183838   | 20.8522 | 17.7545 | -0.2320 | 0.505970 |
| <i>Atad1</i>         | chr19:32672562-32712298   | 49.2377 | 49.8721 | 0.0185  | 0.728574 |
| <i>Mrpl24</i>        | chr3:87919505-87923672    | 83.6510 | 80.5136 | -0.0551 | 0.290141 |
| <i>Gm24500</i>       | chr15:34139252-34139376   | 6.0801  | 7.0828  | 0.2202  | 0.587332 |
| <i>R3hdm4</i>        | chr10:79910052-79917006   | 22.0569 | 22.7211 | 0.0428  | 0.755512 |
| <i>Xpo1</i>          | chr11:23256040-23298249   | 46.1777 | 47.1001 | 0.0285  | 0.772553 |
| <i>4933427D14Rik</i> | chr11:72153928-72207459   | 7.6035  | 7.2366  | -0.0714 | 0.484878 |
| <i>Zfp830</i>        | chr11:82764344-82767622   | 14.1607 | 14.5815 | 0.0422  | 0.750681 |
| <i>Ints2</i>         | chr11:86210680-86257575   | 6.8883  | 6.5546  | -0.0716 | 0.502910 |
| <i>Casc3</i>         | chr11:98804904-98833814   | 17.5866 | 17.9476 | 0.0293  | 0.763170 |
| <i>Ifi27</i>         | chr12:103434210-103440239 | 70.6202 | 66.9071 | -0.0779 | 0.556415 |
| <i>Higd2a</i>        | chr13:54590206-54591158   | 62.3923 | 64.8638 | 0.0560  | 0.751235 |
| <i>Adamts6</i>       | chr13:104287872-104494763 | 13.2543 | 13.4816 | 0.0245  | 0.737185 |
| <i>Rabgef1</i>       | chr5:130171797-130214342  | 6.4242  | 6.1220  | -0.0695 | 0.286192 |
| <i>Lat2</i>          | chr5:134600267-134615023  | 1.5870  | 1.7329  | 0.1269  | 0.665640 |
| <i>Gm24146</i>       | chr5:139844929-139845250  | 27.3816 | 25.2404 | -0.1175 | 0.568807 |
| <i>Ubl3</i>          | chr5:148504630-148552789  | 32.0318 | 30.5953 | -0.0662 | 0.464999 |
| <i>Haus5</i>         | chr7:30653710-30664994    | 6.7318  | 6.3572  | -0.0826 | 0.490054 |
| <i>Plekhb1</i>       | chr7:100642891-100662414  | 1.0750  | 1.1529  | 0.1010  | 0.646351 |
| <i>Il18bp</i>        | chr7:102015078-102018155  | 9.4399  | 9.7980  | 0.0537  | 0.706241 |
| <i>Purg</i>          | chr8:33386324-33417468    | 1.5391  | 1.3867  | -0.1504 | 0.543351 |
| <i>Klh18</i>         | chr9:110425927-110476694  | 4.8542  | 4.6022  | -0.0769 | 0.504161 |
| <i>Rp2h</i>          | chrX:20364480-20405653    | 6.4360  | 6.6770  | 0.0530  | 0.744605 |
| <i>Ndufb11</i>       | chrX:20615325-20617619    | 51.8665 | 48.4943 | -0.0970 | 0.612980 |
| <i>Tcea1-ps1</i>     | chr15:90882614-90883518   | 4.5307  | 4.9141  | 0.1172  | 0.721203 |
| <i>Galnt6</i>        | chr15:100691812-100729376 | 86.4496 | 83.2871 | -0.0538 | 0.267252 |
| <i>Lpar6</i>         | chr14:73237890-73240358   | 49.8115 | 46.8912 | -0.0872 | 0.594980 |
| <i>Zc3h13</i>        | chr14:75284372-75344426   | 14.5653 | 14.8975 | 0.0325  | 0.777792 |
| <i>Ehmt2</i>         | chr17:34898468-34914052   | 22.1219 | 21.2249 | -0.0597 | 0.412556 |
| <i>1700061G19Rik</i> | chr17:56875476-56888904   | 0.8699  | 0.7736  | -0.1693 | 0.494150 |
| <i>Dync2il1</i>      | chr17:84626495-84655558   | 1.3356  | 1.4742  | 0.1424  | 0.613175 |
| <i>Rps6ka4</i>       | chr19:6829084-6840601     | 11.5181 | 10.9340 | -0.0751 | 0.506813 |
| <i>5033417F24Rik</i> | chr1:92908379-92910764    | 4.0066  | 4.2071  | 0.0704  | 0.632313 |
| <i>Fcgr3</i>         | chr1:171051173-171064935  | 0.4953  | 0.4043  | -0.2929 | 0.612245 |
| <i>Tmed7</i>         | chr18:46560234-46597535   | 16.1882 | 16.4308 | 0.0215  | 0.760217 |
| <i>Ppargc1b</i>      | chr18:61298135-61400431   | 3.3816  | 3.5242  | 0.0596  | 0.725188 |
| <i>Adnp2</i>         | chr18:80126337-80151482   | 9.0719  | 9.2101  | 0.0218  | 0.711971 |
| <i>Clic3</i>         | chr2:25456837-25458776    | 7.9541  | 7.4030  | -0.1036 | 0.475503 |
| <i>Osbp12</i>        | chr2:180119305-180162680  | 14.1015 | 13.5448 | -0.0581 | 0.134115 |
| <i>Ap4b1</i>         | chr3:103809519-103822025  | 17.9283 | 17.0205 | -0.0750 | 0.514372 |
| <i>Wdr78</i>         | chr4:103038064-103114555  | 1.4746  | 1.5433  | 0.0657  | 0.698457 |
| <i>Kdm4a</i>         | chr4:118136956-118180043  | 22.6256 | 21.8163 | -0.0525 | 0.233327 |
| <i>NA</i>            | chr4:155694341-155696481  | 3.6827  | 3.8845  | 0.0770  | 0.686602 |
| <i>B930041F14Rik</i> | chr4:155694341-155696481  | 3.6792  | 3.8809  | 0.0770  | 0.686602 |
| <i>Pirb</i>          | chr7:3711408-3720391      | 0.1478  | 0.1807  | 0.2899  | 0.687412 |
| <i>Dapp1</i>         | chr3:137931006-137981545  | 14.4859 | 13.8276 | -0.0671 | 0.358759 |
| <i>Ccz1</i>          | chr5:143987915-144014853  | 32.0929 | 32.6805 | 0.0262  | 0.735599 |
| <i>Gm12749</i>       | chr4:109373700-109374859  | 1.2695  | 1.0676  | -0.2499 | 0.664666 |
| <i>Akr7a5</i>        | chr4:139310743-139318426  | 5.3854  | 5.5793  | 0.0510  | 0.512108 |
| <i>Aasdhppt</i>      | chr9:4294792-4309494      | 10.5919 | 10.8618 | 0.0363  | 0.715353 |
| <i>Ptges3l</i>       | chr11:101418811-101425333 | 1.6235  | 1.4734  | -0.1399 | 0.389507 |
| <i>Pola1</i>         | chrX:93304766-93632155    | 5.5505  | 5.7199  | 0.0434  | 0.789407 |
| <i>Pex3</i>          | chr10:13523841-13553142   | 7.8622  | 8.0081  | 0.0265  | 0.718231 |
| <i>Mtfr2</i>         | chr10:20347818-20361669   | 0.2945  | 0.3519  | 0.2569  | 0.707257 |
| <i>Gm26741</i>       | chr10:52358766-52358853   | 12.3327 | 13.8673 | 0.1692  | 0.595831 |
| <i>2510003E04Rik</i> | chr10:62538625-62578457   | 4.6213  | 4.3923  | -0.0733 | 0.461133 |
| <i>Lppr3</i>         | chr10:79860474-79874634   | 6.6423  | 6.3140  | -0.0731 | 0.443414 |
| <i>Sbno2</i>         | chr10:80057415-80102698   | 17.9675 | 18.5473 | 0.0458  | 0.792756 |
| <i>Sgta</i>          | chr10:81044074-81060178   | 19.4775 | 20.1169 | 0.0466  | 0.771656 |
| <i>Mettl1</i>        | chr10:127041413-127046365 | 8.4000  | 7.9115  | -0.0865 | 0.537081 |
| <i>Trim41</i>        | chr11:48806403-48817353   | 13.9348 | 13.3042 | -0.0668 | 0.483802 |
| <i>Grm6</i>          | chr11:50850684-50866208   | 0.3486  | 0.3846  | 0.1417  | 0.645512 |
| <i>Sar1b</i>         | chr11:51763686-51791925   | 28.9023 | 27.4447 | -0.0747 | 0.450012 |

|                      |                           |           |           |         |          |
|----------------------|---------------------------|-----------|-----------|---------|----------|
| <i>Slc5a10</i>       | chr11:61672780-61720826   | 2.6200    | 2.4132    | -0.1186 | 0.584304 |
| <i>Ppm1d</i>         | chr11:85311243-85347066   | 16.1680   | 15.3899   | -0.0712 | 0.485100 |
| <i>Rara</i>          | chr11:98927817-98974942   | 12.9228   | 13.3147   | 0.0431  | 0.784978 |
| <i>Krt10</i>         | chr11:99385253-99389364   | 0.4433    | 0.5140    | 0.2134  | 0.629435 |
| <i>Fdxr</i>          | chr11:115268023-115277050 | 9.3450    | 8.8606    | -0.0768 | 0.445089 |
| <i>Unk</i>           | chr11:116030321-116061214 | 11.4910   | 11.7850   | 0.0364  | 0.787360 |
| <i>Zbtb1</i>         | chr12:76370265-76396950   | 11.7880   | 11.9196   | 0.0160  | 0.788374 |
| <i>2310015A10Rik</i> | chr12:80120547-80132844   | 7.0642    | 6.6344    | -0.0905 | 0.634757 |
| <i>Prox2</i>         | chr12:85085813-85106431   | 1.6494    | 1.7349    | 0.0729  | 0.677283 |
| <i>Sptlc1</i>        | chr13:53332715-53377365   | 24.7619   | 25.1776   | 0.0240  | 0.780198 |
| <i>Prr7</i>          | chr13:55464266-55473155   | 7.3560    | 6.8242    | -0.1083 | 0.603623 |
| <i>Idnk</i>          | chr13:58157648-58164693   | 44.9800   | 43.0850   | -0.0621 | 0.376038 |
| <i>Dimt1</i>         | chr13:106947128-106960224 | 7.6065    | 7.1820    | -0.0829 | 0.444270 |
| <i>Pus7</i>          | chr5:23740647-23783711    | 9.5198    | 9.1131    | -0.0630 | 0.351380 |
| <i>Sept11</i>        | chr5:93093456-93174958    | 23.0269   | 23.3764   | 0.0217  | 0.781189 |
| <i>Gm15792</i>       | chr5:110331205-110333203  | 0.8850    | 1.0311    | 0.2204  | 0.512437 |
| <i>Fam101a</i>       | chr5:125003446-125012547  | 0.6894    | 0.5960    | -0.2102 | 0.490339 |
| <i>Cct6a</i>         | chr5:129787438-129845820  | 119.5764  | 113.6630  | -0.0732 | 0.559635 |
| <i>Zfp113</i>        | chr5:138139701-138155744  | 6.5395    | 6.7043    | 0.0359  | 0.746727 |
| <i>Usp1</i>          | chr5:149184349-149215434  | 16.6770   | 15.9689   | -0.0626 | 0.437426 |
| <i>Creb3l2</i>       | chr6:37327254-37442146    | 0.5645    | 0.5181    | -0.1237 | 0.324894 |
| <i>Mrps33</i>        | chr6:39801803-39810988    | 2.1601    | 2.3204    | 0.1033  | 0.585228 |
| <i>Jazf1</i>         | chr6:52768796-53068631    | 2.1201    | 1.9555    | -0.1166 | 0.450467 |
| <i>Rab43</i>         | chr6:87788852-87812164    | 8.9605    | 9.1524    | 0.0306  | 0.769763 |
| <i>Frm4b</i>         | chr6:97286866-97617541    | 0.8552    | 0.7953    | -0.1049 | 0.503157 |
| <i>Scarna10</i>      | chr6:125186358-125186683  | 4336.9226 | 4032.5391 | -0.1050 | 0.665852 |
| <i>Gm15706</i>       | chr6:145250528-145251849  | 6.7703    | 7.1867    | 0.0861  | 0.725831 |
| <i>Bbc3</i>          | chr7:16309615-16318205    | 7.2239    | 6.6913    | -0.1105 | 0.663614 |
| <i>Ercc2</i>         | chr7:19382009-19395694    | 14.9960   | 14.3002   | -0.0685 | 0.481749 |
| <i>Rpl13a</i>        | chr7:45125557-45136231    | 598.6411  | 626.5064  | 0.0656  | 0.776073 |
| <i>Fam169b</i>       | chr7:68273838-68363089    | 39.6709   | 40.1920   | 0.0188  | 0.774510 |
| <i>3110040N11Rik</i> | chr7:81782181-81789478    | 14.2555   | 13.3501   | -0.0947 | 0.550367 |
| <i>Aamd</i>          | chr7:97550330-97579497    | 7.2591    | 7.5812    | 0.0626  | 0.713397 |
| <i>Ikzf5</i>         | chr7:131388651-131410521  | 7.0591    | 7.1978    | 0.0281  | 0.632660 |
| <i>Crtc1</i>         | chr8:70382354-70439579    | 1.0839    | 1.1399    | 0.0727  | 0.745239 |
| <i>Gm16177</i>       | chr8:86659317-86660035    | 1.1378    | 1.3583    | 0.2556  | 0.683865 |
| <i>Gm22620</i>       | chr9:15315188-15315321    | 12.8211   | 14.2030   | 0.1477  | 0.646612 |
| <i>Tex9</i>          | chr9:72458054-72491959    | 7.2049    | 7.4217    | 0.0428  | 0.714314 |
| <i>Slc25a38</i>      | chr9:120110373-120124504  | 8.2817    | 7.8748    | -0.0727 | 0.322104 |
| <i>Syp</i>           | chrX:7638470-7653256      | 0.2943    | 0.2523    | -0.2218 | 0.537904 |
| <i>Xlra4</i>         | chrX:73074344-73082478    | 13.7200   | 12.9594   | -0.0823 | 0.461917 |
| <i>Pja1</i>          | chrX:99465733-99471273    | 16.6969   | 15.6835   | -0.0903 | 0.607536 |
| <i>Zdhhc15</i>       | chrX:104536968-104671064  | 12.0809   | 11.4946   | -0.0718 | 0.517015 |
| <i>Ammecr1</i>       | chrX:142851145-142966728  | 2.8567    | 2.6784    | -0.0930 | 0.578869 |
| <i>Maged2</i>        | chrX:150806369-150814345  | 0.7658    | 0.6828    | -0.1656 | 0.522386 |
| <i>Syap1</i>         | chrX:162857056-162888447  | 16.5264   | 16.9380   | 0.0355  | 0.716867 |
| <i>Mospd2</i>        | chrX:164936168-164980375  | 2.8458    | 2.6876    | -0.0825 | 0.519479 |
| <i>Zfat</i>          | chr15:68083765-68258856   | 2.6800    | 2.7453    | 0.0347  | 0.636288 |
| <i>Cacnb3</i>        | chr15:98632219-98644530   | 0.3115    | 0.2642    | -0.2372 | 0.486476 |
| <i>Thoc7</i>         | chr14:13949013-13961225   | 50.1120   | 47.4938   | -0.0774 | 0.518753 |
| <i>Traj2</i>         | chr14:54217835-54217901   | 96.2030   | 100.7776  | 0.0670  | 0.617158 |
| <i>Dhrs1</i>         | chr14:55739019-55745690   | 8.3676    | 8.5935    | 0.0384  | 0.718336 |
| <i>Zmym2</i>         | chr14:56887794-56962579   | 37.7363   | 38.3424   | 0.0230  | 0.763301 |
| <i>Ermard</i>        | chr17:15041640-15064232   | 6.1529    | 5.8072    | -0.0834 | 0.417033 |
| <i>Rgs11</i>         | chr17:26202950-26211324   | 6.5198    | 6.7920    | 0.0590  | 0.771244 |
| <i>Zbtb9</i>         | chr17:26973166-26976205   | 32.4688   | 31.0162   | -0.0660 | 0.456876 |
| <i>Rps18</i>         | chr17:33951998-33956001   | 52.3431   | 49.3546   | -0.0848 | 0.595043 |
| <i>Tubb5</i>         | chr17:35833925-35838306   | 393.3740  | 400.6193  | 0.0263  | 0.787301 |
| <i>Nlrc4</i>         | chr17:74426294-74459108   | 0.3622    | 0.4012    | 0.1476  | 0.630768 |
| <i>Gm16314</i>       | chr16:18498900-18501658   | 3.6605    | 3.3132    | -0.1438 | 0.469926 |
| <i>BC106179</i>      | chr16:23220655-23225368   | 8.6787    | 8.2579    | -0.0717 | 0.441400 |
| <i>Fgfbp3</i>        | chr19:36917549-36919615   | 1.5588    | 1.3863    | -0.1692 | 0.548635 |
| <i>Tctn3</i>         | chr19:40596445-40612233   | 3.2572    | 3.0538    | -0.0930 | 0.441392 |
| <i>Nhlrc2</i>        | chr19:56548260-56598846   | 12.7462   | 12.9427   | 0.0221  | 0.665302 |
| <i>B230217O12Rik</i> | chr19:57323384-57360775   | 4.9807    | 4.6150    | -0.1100 | 0.512966 |
| <i>Pms1</i>          | chr1:53189186-53297018    | 5.6281    | 5.7979    | 0.0429  | 0.740040 |
| <i>Asb1</i>          | chr1:91540564-91559590    | 5.2474    | 4.9863    | -0.0736 | 0.432545 |
| <i>Slc26a2</i>       | chr18:61192918-61211612   | 5.1565    | 4.9101    | -0.0707 | 0.524915 |
| <i>Itih5</i>         | chr2:10153570-10256529    | 1.4676    | 1.3152    | -0.1581 | 0.720923 |
| <i>Rab6</i>          | chr2:25583017-25608521    | 14.7852   | 14.9746   | 0.0184  | 0.722853 |
| <i>St6galnac6</i>    | chr2:32599708-32620806    | 0.6473    | 0.5700    | -0.1833 | 0.613701 |

|               |                           |         |         |         |          |
|---------------|---------------------------|---------|---------|---------|----------|
| Mir1955       | chr2:92191976-92192074    | 10.7713 | 12.3868 | 0.2016  | 0.589470 |
| Rmdn3         | chr2:119137000-119157034  | 10.5025 | 10.6698 | 0.0228  | 0.577784 |
| Bcl2l11       | chr2:128126037-128162547  | 9.8229  | 10.0670 | 0.0354  | 0.794118 |
| Ndr3          | chr2:156927344-156992056  | 12.9395 | 13.1700 | 0.0255  | 0.757482 |
| Mab21l2       | chr3:86545580-86548283    | 1.2188  | 1.1074  | -0.1384 | 0.475665 |
| Cd1d1         | chr3:86995833-86999441    | 16.9748 | 16.1605 | -0.0709 | 0.482229 |
| Golph3l       | chr3:95588933-95619247    | 21.2749 | 21.8377 | 0.0377  | 0.760456 |
| Cd160         | chr3:96798762-96829351    | 18.3044 | 17.2822 | -0.0829 | 0.565533 |
| Bcas2         | chr3:103171654-103179166  | 22.5946 | 21.6467 | -0.0618 | 0.385350 |
| A93005H10Rik  | chr3:115887821-115888130  | 38.9707 | 36.3211 | -0.1016 | 0.537470 |
| Usp33         | chr3:152346477-152393612  | 17.6589 | 17.9720 | 0.0254  | 0.757148 |
| Bach2os       | chr4:32559679-32571708    | 4.0538  | 4.3322  | 0.0958  | 0.775817 |
| Trmt10b       | chr4:45297126-45316131    | 7.0319  | 7.2783  | 0.0497  | 0.704040 |
| Pcsk9         | chr4:106442328-106464329  | 0.3203  | 0.2754  | -0.2178 | 0.525404 |
| Park7         | chr4:150897132-150914437  | 40.7926 | 42.2053 | 0.0491  | 0.777623 |
| Ssu72         | chr4:155704799-155733879  | 34.0727 | 34.6585 | 0.0246  | 0.756984 |
| Polr3c        | chr3:96711489-96727628    | 19.5082 | 19.8611 | 0.0259  | 0.769237 |
| Gm17195       | chr12:79163407-79163835   | 7.8946  | 8.4674  | 0.1010  | 0.673698 |
| Itgal         | chr7:127296259-127335137  | 34.7001 | 35.5524 | 0.0350  | 0.815054 |
| Traj11        | chr14:54207138-54207197   | 86.2800 | 78.4666 | -0.1369 | 0.552849 |
| Tmem156       | chr5:65063207-65091555    | 21.1230 | 19.9395 | -0.0832 | 0.489236 |
| Enpp1         | chr10:24637913-24712159   | 1.3341  | 1.2513  | -0.0925 | 0.489816 |
| Msgn1         | chr12:11208381-11208948   | 1.7767  | 1.5222  | -0.2230 | 0.493717 |
| A830010M20Rik | chr5:107497377-107580596  | 2.0184  | 2.1131  | 0.0662  | 0.789438 |
| Ap3s2         | chr7:79875331-79920640    | 5.8466  | 5.5683  | -0.0703 | 0.456325 |
| Gm16312       | chr19:4000757-4001232     | 8.5860  | 9.2940  | 0.1143  | 0.652885 |
| Pten          | chr19:32757496-32826160   | 24.5631 | 23.6086 | -0.0572 | 0.388557 |
| Dstyk         | chr1:132417452-132466959  | 3.2695  | 3.3460  | 0.0334  | 0.624514 |
| Flii          | chr11:60714122-60727263   | 40.3601 | 40.9160 | 0.0197  | 0.796766 |
| Wipf2         | chr11:98863637-98905040   | 4.3965  | 4.1521  | -0.0825 | 0.602374 |
| Nfkbia        | chr12:55489410-55492647   | 98.8619 | 94.2424 | -0.0690 | 0.504885 |
| Slc46a3       | chr5:147878436-147894815  | 7.1964  | 7.3735  | 0.0351  | 0.659233 |
| Erp27         | chr6:136907310-136922180  | 1.3169  | 1.4192  | 0.1080  | 0.739841 |
| Gm15964       | chr16:91611467-91623861   | 15.5307 | 14.8630 | -0.0634 | 0.312926 |
| 4933412A08Rik | chr19:60226333-60227678   | 1.8132  | 1.6404  | -0.1445 | 0.217676 |
| Gm8251        | chr1:44055951-44061936    | 0.6548  | 0.5935  | -0.1420 | 0.547010 |
| Gin1          | chr1:97770171-97793709    | 3.6439  | 3.7559  | 0.0437  | 0.623849 |
| Dusp23        | chr1:172630768-172632974  | 0.8234  | 0.7121  | -0.2096 | 0.492412 |
| Smad7         | chr18:75367528-75395935   | 34.1568 | 32.4991 | -0.0718 | 0.587982 |
| Ptpmt1        | chr2:90908715-90918258    | 10.5964 | 10.1208 | -0.0663 | 0.335573 |
| Cybrd1        | chr2:71117922-71142926    | 0.1475  | 0.1686  | 0.1924  | 0.532626 |
| Cyth2         | chr7:45806636-45814581    | 19.1073 | 18.2873 | -0.0633 | 0.434994 |
| Prickle4      | chr17:47688516-47694736   | 0.4122  | 0.4810  | 0.2226  | 0.544613 |
| Trmt2a        | chr16:18248678-18254772   | 19.2921 | 18.5648 | -0.0554 | 0.297151 |
| Ccdc23        | chr4:119195305-119201298  | 16.2014 | 15.2729 | -0.0851 | 0.460213 |
| Izumo4        | chr10:80702692-80705382   | 49.9217 | 47.4604 | -0.0729 | 0.532211 |
| Rdh5          | chr10:128913592-128922888 | 10.2605 | 9.7451  | -0.0743 | 0.450797 |
| Ttc1          | chr11:43729511-43748008   | 19.9052 | 18.9038 | -0.0745 | 0.522418 |
| Gpatch2l      | chr12:86241889-86291414   | 17.2291 | 17.4493 | 0.0183  | 0.756567 |
| Gmnn          | chr13:24751844-24761923   | 5.4713  | 5.6839  | 0.0550  | 0.653459 |
| Gm15613       | chr5:32479559-32479885    | 7.3537  | 6.6175  | -0.1522 | 0.476563 |
| Mtf2          | chr5:108065673-108109004  | 23.8929 | 24.1796 | 0.0172  | 0.734031 |
| Rasal1        | chr5:120648811-120679597  | 5.9520  | 6.0959  | 0.0345  | 0.741664 |
| Trnt1         | chr6:106769119-106782474  | 35.2771 | 35.8778 | 0.0244  | 0.768204 |
| Gm16175       | chr7:19809608-19811872    | 3.0440  | 3.6096  | 0.2459  | 0.643619 |
| Dnajc13       | chr9:104151596-104262930  | 23.0705 | 22.1611 | -0.0580 | 0.447388 |
| Pde12         | chr14:26659957-26669883   | 9.7917  | 9.9387  | 0.0215  | 0.703799 |
| Vasn          | chr16:4639940-4650802     | 3.9128  | 4.1652  | 0.0902  | 0.774330 |
| Btaf1         | chr19:36926078-37012752   | 31.6771 | 30.2597 | -0.0660 | 0.539894 |
| Gpr55         | chr1:85939536-85961055    | 5.5285  | 5.1772  | -0.0947 | 0.508270 |
| 4930403D09Rik | chr11:34299706-34308113   | 14.6197 | 15.4802 | 0.0825  | 0.764779 |
| Nicn1         | chr9:108290447-108296498  | 0.9756  | 1.0583  | 0.1174  | 0.575921 |
| Pdha1         | chrX:16012208-160138413   | 50.7864 | 51.8391 | 0.0296  | 0.776355 |
| Gm26679       | chr14:120384262-120388985 | 5.1045  | 5.3508  | 0.0680  | 0.647334 |
| Alyref2       | chr1:171503477-171504750  | 7.6585  | 8.0650  | 0.0746  | 0.730088 |
| 4930415F15Rik | chr11:11462093-11515192   | 1.1974  | 1.0412  | -0.2016 | 0.505347 |
| Gm26745       | chr5:123047372-123230871  | 1.1289  | 0.9832  | -0.1993 | 0.588130 |
| C2cd5         | chr6:143010919-143100107  | 13.4815 | 13.7347 | 0.0268  | 0.782399 |
| Setd1a        | chr7:127776669-127800122  | 5.4074  | 5.6092  | 0.0529  | 0.791196 |
| Slc16a8       | chr15:79251013-79254761   | 0.3977  | 0.4576  | 0.2024  | 0.549614 |
| Mcm6          | chr1:128331590-128359656  | 62.8696 | 63.6528 | 0.0179  | 0.817464 |

|                      |                           |          |          |         |          |
|----------------------|---------------------------|----------|----------|---------|----------|
| <i>E330020D12Rik</i> | chr1:153404826-153408429  | 0.5903   | 0.6564   | 0.1531  | 0.465750 |
| <i>Shc1</i>          | chr3:89418442-89430015    | 7.4171   | 7.5561   | 0.0268  | 0.713158 |
| <i>Ddx20</i>         | chr3:105678269-105687574  | 11.6865  | 11.1034  | -0.0738 | 0.506959 |
| <i>Cln6</i>          | chr4:148004258-148038821  | 5.0309   | 4.7820   | -0.0732 | 0.525311 |
| <i>Lgals4</i>        | chr7:28833974-28841703    | 3.6295   | 3.3696   | -0.1072 | 0.526250 |
| <i>Plcl2</i>         | chr17:50509546-50688493   | 60.2745  | 60.7799  | 0.0120  | 0.728864 |
| <i>Cpox</i>          | chr16:58670207-58680391   | 6.0236   | 6.1933   | 0.0401  | 0.717791 |
| <i>B230369F24Rik</i> | chr1:178313327-178318549  | 1.6024   | 1.4731   | -0.1213 | 0.234759 |
| <i>Mapkbp1</i>       | chr2:119972698-120027408  | 2.3914   | 2.4998   | 0.0639  | 0.765052 |
| <i>Trav7-6</i>       | chr14:53716715-53717290   | 3.6212   | 4.0059   | 0.1456  | 0.592555 |
| <i>Zufsp</i>         | chr10:33926935-33951212   | 27.7618  | 28.5909  | 0.0425  | 0.783112 |
| <i>Got2-ps1</i>      | chr5:138364172-138365580  | 0.6767   | 0.5714   | -0.2440 | 0.534177 |
| <i>Gm5113</i>        | chr7:30169874-30180209    | 1.1484   | 1.0291   | -0.1583 | 0.598585 |
| <i>Scn3b</i>         | chr9:40269215-40291618    | 0.2097   | 0.2377   | 0.1809  | 0.676999 |
| <i>Man2c1</i>        | chr9:57130689-57142722    | 15.0212  | 15.2513  | 0.0219  | 0.799190 |
| <i>Ptp4a3</i>        | chr15:73723144-73758766   | 21.0345  | 19.7854  | -0.0883 | 0.631645 |
| <i>Triobp</i>        | chr15:78947723-79005867   | 3.9168   | 4.0113   | 0.0344  | 0.775452 |
| <i>Rnf14</i>         | chr18:38296634-38317847   | 25.4945  | 24.4753  | -0.0589 | 0.370332 |
| <i>Camk2a</i>        | chr18:60925617-60988152   | 0.1192   | 0.1353   | 0.1819  | 0.486266 |
| <i>C8g</i>           | chr2:25498650-25501719    | 1.8025   | 1.9432   | 0.1084  | 0.684763 |
| <i>Ttc13</i>         | chr8:124671334-124721983  | 28.1010  | 28.5069  | 0.0207  | 0.807071 |
| <i>Zmiz2</i>         | chr11:6389073-6406158     | 8.2678   | 8.5791   | 0.0533  | 0.790474 |
| <i>Pnpla8</i>        | chr12:44221369-44312343   | 15.1302  | 14.4866  | -0.0627 | 0.410072 |
| <i>Tmem120b</i>      | chr5:123068414-123117749  | 4.4968   | 4.6369   | 0.0442  | 0.595899 |
| <i>Gna12</i>         | chr5:140758407-140830431  | 6.3347   | 6.4959   | 0.0363  | 0.751653 |
| <i>Sec23ip</i>       | chr7:128744869-128784836  | 19.3596  | 18.6339  | -0.0551 | 0.258359 |
| <i>Pfn1</i>          | chr11:70651849-70654644   | 360.7238 | 370.1523 | 0.0372  | 0.796769 |
| <i>Cyth1</i>         | chr11:118132018-118248592 | 92.2554  | 89.0496  | -0.0510 | 0.273237 |
| <i>Apc</i>           | chr18:34220923-34322189   | 9.9340   | 10.1480  | 0.0308  | 0.797634 |
| <i>Cpsf4</i>         | chr5:145167212-145182041  | 15.1048  | 15.3402  | 0.0223  | 0.708447 |
| <i>Cd79a</i>         | chr7:24897380-24902197    | 2.3109   | 2.4546   | 0.0870  | 0.592343 |
| <i>Lin37</i>         | chr7:30555440-30559838    | 12.4055  | 12.8069  | 0.0459  | 0.722845 |
| <i>Gm6180</i>        | chr8:42246910-42247411    | 17.2701  | 16.0593  | -0.1049 | 0.546525 |
| <i>Grasp</i>         | chr15:101224206-101232755 | 4.5168   | 4.7940   | 0.0859  | 0.758630 |
| <i>Phlpp1</i>        | chr1:106171751-106394250  | 1.8470   | 1.9257   | 0.0602  | 0.751214 |
| <i>Tdrkh</i>         | chr3:94413295-94432633    | 0.7013   | 0.7575   | 0.1112  | 0.668749 |
| <i>Dtnb</i>          | chr12:3572380-3781796     | 4.4957   | 4.5928   | 0.0308  | 0.761360 |
| <i>Exoc4</i>         | chr6:33249084-33973979    | 11.4739  | 11.6895  | 0.0268  | 0.803781 |
| <i>Gm25791</i>       | chr9:15314844-15314981    | 100.3060 | 111.3764 | 0.1510  | 0.705684 |
| <i>Srsf3</i>         | chr17:29032672-29043366   | 66.1709  | 63.6608  | -0.0558 | 0.419374 |
| <i>Gm13157</i>       | chr4:147753973-147809788  | 11.4363  | 11.7203  | 0.0354  | 0.731110 |
| <i>Mxra8</i>         | chr4:155839679-155844088  | 0.3499   | 0.3013   | -0.2157 | 0.305492 |
| <i>Rpl18a</i>        | chr8:70894721-70897443    | 68.7180  | 64.4804  | -0.0918 | 0.639834 |
| <i>Prdx3</i>         | chr19:60864050-60874556   | 50.5142  | 48.0571  | -0.0719 | 0.533471 |
| <i>Gm10518</i>       | chr1:179803375-179804676  | 7.0017   | 7.3293   | 0.0660  | 0.744176 |
| <i>Ttl9</i>          | chr2:152962484-153008482  | 0.4710   | 0.5303   | 0.1709  | 0.638350 |
| <i>Tcrp-C1</i>       | chr13:19214102-19216618   | 6.6610   | 5.9537   | -0.1620 | 0.599754 |
| <i>Gm17112</i>       | chr5:137532422-137540718  | 3.2330   | 2.8366   | -0.1887 | 0.407273 |
| <i>Npm3-ps1</i>      | chr6:85076191-85076719    | 1.8410   | 2.1402   | 0.2172  | 0.675230 |
| <i>Irf2bp1</i>       | chr7:19004064-19006761    | 12.0248  | 11.4270  | -0.0736 | 0.524940 |
| <i>Plekha4</i>       | chr7:45526329-45554229    | 0.1904   | 0.2239   | 0.2337  | 0.635753 |
| <i>Map1lc3b</i>      | chr8:121590360-121598760  | 8.6657   | 8.3271   | -0.0575 | 0.224707 |
| <i>Hyal2</i>         | chr9:107569116-107572776  | 3.2256   | 2.9701   | -0.1190 | 0.592727 |
| <i>Gm6023</i>        | chrX:36213523-36214129    | 1.5634   | 1.3297   | -0.2336 | 0.534551 |
| <i>Nt5dc2</i>        | chr14:31134852-31139121   | 1.0736   | 0.9384   | -0.1941 | 0.487232 |
| <i>Serp2</i>         | chr14:76532813-76556687   | 4.8910   | 5.2556   | 0.1037  | 0.722679 |
| <i>Gm26781</i>       | chr1:136259406-136274406  | 2.3735   | 2.5266   | 0.0902  | 0.652745 |
| <i>Gm13421</i>       | chr2:27540425-27543362    | 1.7834   | 2.0012   | 0.1662  | 0.676741 |
| <i>Zbtb43</i>        | chr2:33450286-33468559    | 10.9693  | 10.5161  | -0.0609 | 0.340465 |
| <i>Nnat</i>          | chr2:157560077-157562522  | 0.8161   | 0.9077   | 0.1535  | 0.627225 |
| <i>Gm14321</i>       | chr2:16777466-167782569   | 5.9440   | 5.4335   | -0.1296 | 0.602327 |
| <i>Rnf220</i>        | chr4:117271462-117497052  | 13.1195  | 13.4256  | 0.0333  | 0.796938 |
| <i>Tmem201</i>       | chr4:149715374-149738044  | 2.9397   | 3.0488   | 0.0526  | 0.784451 |
| <i>Zfp87</i>         | chr13:67515780-67526177   | 15.7605  | 15.0446  | -0.0671 | 0.442678 |
| <i>Ap3b1</i>         | chr13:94358959-94566316   | 33.8790  | 34.1947  | 0.0134  | 0.752751 |
| <i>Gtf3a</i>         | chr5:146948656-146955614  | 32.5713  | 31.3687  | -0.0543 | 0.201712 |
| <i>Esr1</i>          | chr10:4611592-5005614     | 0.6350   | 0.6680   | 0.0730  | 0.749608 |
| <i>Utrn</i>          | chr10:12382187-12861735   | 110.9588 | 106.7603 | -0.0556 | 0.498864 |
| <i>Tbpl1</i>         | chr10:22703878-22731938   | 19.4459  | 18.6088  | -0.0635 | 0.470766 |
| <i>Stx7</i>          | chr10:24149316-24188959   | 8.7681   | 8.9475   | 0.0292  | 0.671823 |
| <i>Ube2d1</i>        | chr10:71254979-71285262   | 6.2124   | 6.3714   | 0.0365  | 0.768500 |

|                      |                           |          |          |         |          |
|----------------------|---------------------------|----------|----------|---------|----------|
| <i>Pttg1ip</i>       | chr10:77581719-77598732   | 18.2672  | 17.5151  | -0.0607 | 0.467230 |
| <i>Palm</i>          | chr10:79793571-79820896   | 0.6589   | 0.7249   | 0.1377  | 0.719008 |
| <i>Zfp938</i>        | chr10:82224849-82241280   | 7.0478   | 7.2801   | 0.0468  | 0.736303 |
| <i>Pwp1</i>          | chr10:85871830-85889096   | 23.4246  | 23.9049  | 0.0293  | 0.761898 |
| <i>Fbxo7</i>         | chr10:86021971-86051873   | 5.9081   | 5.6534   | -0.0636 | 0.359257 |
| <i>Ccdc38</i>        | chr10:93540631-93584327   | 4.0240   | 3.7639   | -0.0964 | 0.658885 |
| <i>Nr2c1</i>         | chr10:94148022-94197211   | 3.6925   | 3.7977   | 0.0405  | 0.752016 |
| <i>Bbs10</i>         | chr10:111298678-111301736 | 3.5617   | 3.3512   | -0.0879 | 0.269066 |
| <i>Glipr1</i>        | chr10:111985447-112002631 | 59.0829  | 60.2673  | 0.0286  | 0.787757 |
| <i>Kcnmb4os2</i>     | chr10:116473162-116475319 | 1.3212   | 1.4391   | 0.1233  | 0.727635 |
| <i>Stac3</i>         | chr10:127501685-127508823 | 0.4566   | 0.3964   | -0.2041 | 0.316129 |
| <i>Timeless</i>      | chr10:128232064-128252941 | 9.3543   | 8.9531   | -0.0633 | 0.483956 |
| <i>Ormdl2</i>        | chr10:128817456-128821631 | 23.9153  | 22.8098  | -0.0683 | 0.505654 |
| <i>Tcn2</i>          | chr11:3917191-3932159     | 4.0402   | 3.7685   | -0.1005 | 0.605113 |
| <i>AA413626</i>      | chr11:4918509-4919003     | 5.6577   | 6.0838   | 0.1047  | 0.741410 |
| <i>Bod1</i>          | chr11:31665180-31671885   | 7.4572   | 7.6762   | 0.0418  | 0.665574 |
| <i>Gm12141</i>       | chr11:41498736-41500901   | 0.6040   | 0.5255   | -0.2010 | 0.581165 |
| <i>Gnb2l1</i>        | chr11:48800331-48806434   | 472.0373 | 445.3390 | -0.0840 | 0.645507 |
| <i>Scgb3a1</i>       | chr11:49663609-49665118   | 1.0986   | 1.3095   | 0.2533  | 0.694438 |
| <i>Rmnd5b</i>        | chr11:51623670-51635896   | 35.6825  | 35.9727  | 0.0117  | 0.787088 |
| <i>Ppp2ca</i>        | chr11:52098680-52127778   | 44.4076  | 42.6319  | -0.0589 | 0.455019 |
| <i>Hspa4</i>         | chr11:53259813-53300457   | 54.5123  | 52.3117  | -0.0594 | 0.521288 |
| <i>Aff4</i>          | chr11:53350832-53421830   | 16.4349  | 16.6687  | 0.0204  | 0.827958 |
| <i>Leap2</i>         | chr11:53422180-53423170   | 2.4579   | 2.7355   | 0.1544  | 0.619556 |
| <i>Gm12216</i>       | chr11:53783417-53859256   | 7.2839   | 6.9211   | -0.0737 | 0.431817 |
| <i>Rnf187</i>        | chr11:58932287-58938916   | 67.0246  | 64.4625  | -0.0562 | 0.470062 |
| <i>Gm12266</i>       | chr11:60343244-60344206   | 0.9637   | 1.0891   | 0.1765  | 0.575939 |
| <i>Grap</i>          | chr11:61653264-61672784   | 85.9125  | 82.0065  | -0.0671 | 0.540874 |
| <i>Cdk5r1</i>        | chr11:80477045-80481179   | 0.9682   | 0.8888   | -0.1235 | 0.496268 |
| <i>Slfn9</i>         | chr11:82979628-82991830   | 3.5913   | 3.7113   | 0.0474  | 0.779972 |
| <i>Ankrd40</i>       | chr11:94328000-94341841   | 13.5041  | 13.7408  | 0.0251  | 0.800108 |
| <i>Gm11521</i>       | chr11:95336010-95337408   | 6.4453   | 5.7668   | -0.1605 | 0.587370 |
| <i>Npepps</i>        | chr11:97205841-97280638   | 5.9198   | 6.0187   | 0.0239  | 0.765603 |
| <i>Cisd3</i>         | chr11:97685825-97688621   | 8.6698   | 8.1306   | -0.0926 | 0.361050 |
| <i>Krt222</i>        | chr11:99232760-99244085   | 0.9853   | 0.9007   | -0.1295 | 0.477381 |
| <i>Leprel4</i>       | chr11:100408455-100414836 | 0.8245   | 0.7294   | -0.1767 | 0.597357 |
| <i>Hspb9</i>         | chr11:100713849-100714575 | 1.4218   | 1.1766   | -0.2731 | 0.636257 |
| <i>Ramp2</i>         | chr11:101246027-101259546 | 10.7386  | 10.9579  | 0.0292  | 0.793537 |
| <i>Grn</i>           | chr11:102430314-102437048 | 1.8258   | 1.9533   | 0.0974  | 0.788584 |
| <i>Gm11715</i>       | chr11:107157407-107167150 | 10.0810  | 10.5388  | 0.0641  | 0.664724 |
| <i>9930022D16Rik</i> | chr11:109413916-109420405 | 0.3746   | 0.4252   | 0.1830  | 0.656485 |
| <i>Cdr2l</i>         | chr11:115381915-115396132 | 0.7914   | 0.8396   | 0.0853  | 0.475606 |
| <i>Itgb4</i>         | chr11:115974708-116008412 | 0.4905   | 0.4459   | -0.1373 | 0.487873 |
| <i>Trim47</i>        | chr11:116105751-116127210 | 1.2772   | 1.1630   | -0.1351 | 0.583320 |
| <i>Srp68</i>         | chr11:116245165-116274217 | 15.9536  | 16.2422  | 0.0259  | 0.781742 |
| <i>Prpsap1</i>       | chr11:116470844-116494202 | 14.9692  | 14.3367  | -0.0623 | 0.464486 |
| <i>Gm26508</i>       | chr11:119077572-119081865 | 23.4892  | 24.0725  | 0.0354  | 0.783694 |
| <i>1810043H04Rik</i> | chr11:120098927-120100704 | 10.6969  | 10.0165  | -0.0948 | 0.470348 |
| <i>P4hb</i>          | chr11:120560297-120573253 | 84.8433  | 81.8591  | -0.0517 | 0.334737 |
| <i>Npb</i>           | chr11:120608476-120609093 | 1.5476   | 1.3212   | -0.2282 | 0.327341 |
| <i>Grhl1</i>         | chr12:24572286-24617391   | 0.3785   | 0.4210   | 0.1535  | 0.681467 |
| <i>2700097O09Rik</i> | chr12:55045660-55080110   | 2.3384   | 2.1918   | -0.0934 | 0.610361 |
| <i>Pole2</i>         | chr12:69201778-69228190   | 26.0388  | 24.8901  | -0.0651 | 0.472940 |
| <i>Gm20498</i>       | chr12:81358859-81532905   | 14.1774  | 14.4916  | 0.0316  | 0.777725 |
| <i>Fcf1</i>          | chr12:84970896-84983303   | 18.4114  | 17.4831  | -0.0746 | 0.391306 |
| <i>Acyp1</i>         | chr12:85272397-85288438   | 15.4712  | 16.0762  | 0.0553  | 0.787166 |
| <i>Tmed10</i>        | chr12:85340613-85374717   | 12.2076  | 12.3544  | 0.0173  | 0.666363 |
| <i>Btbd7</i>         | chr12:102784655-102878406 | 17.5942  | 17.8472  | 0.0206  | 0.759990 |
| <i>Zbtb42</i>        | chr12:112678827-112682747 | 2.1228   | 2.2500   | 0.0840  | 0.760076 |
| <i>9230104M06Rik</i> | chr12:112999963-113001926 | 3.8020   | 3.5432   | -0.1017 | 0.586857 |
| <i>Hist1h4a</i>      | chr13:23760801-23761249   | 8.9897   | 9.5168   | 0.0822  | 0.650157 |
| <i>Serpinc6a</i>     | chr13:33917917-34002794   | 5.3905   | 5.4743   | 0.0222  | 0.721430 |
| <i>Fars2</i>         | chr13:36117410-36537592   | 13.0101  | 13.2295  | 0.0241  | 0.698406 |
| <i>Zfp169</i>        | chr13:48487646-48513451   | 5.4128   | 5.5491   | 0.0359  | 0.805059 |
| <i>Simc1</i>         | chr13:54503778-54551290   | 5.5361   | 5.6290   | 0.0240  | 0.738827 |
| <i>Ubqln1</i>        | chr13:58176155-58215653   | 41.6849  | 42.0898  | 0.0139  | 0.771382 |
| <i>4930525G20Rik</i> | chr13:67796593-67830985   | 0.8788   | 0.9429   | 0.1016  | 0.613724 |
| <i>Tmem167</i>       | chr13:90089122-90143907   | 10.4229  | 10.5792  | 0.0215  | 0.809640 |
| <i>Dhfr</i>          | chr13:92354782-92389053   | 2.6618   | 2.7513   | 0.0477  | 0.799095 |
| <i>Ankrd55</i>       | chr13:112288450-112384002 | 1.3367   | 1.2107   | -0.1428 | 0.643226 |
| <i>Pelo</i>          | chr13:115088356-115090188 | 6.1481   | 5.7966   | -0.0849 | 0.391515 |

|               |                          |          |          |         |          |
|---------------|--------------------------|----------|----------|---------|----------|
| 5031425E22Rik | chr5:23431809-23433919   | 33.5342  | 32.3312  | -0.0527 | 0.158611 |
| Abcf2         | chr5:24565340-24577467   | 37.6173  | 38.1020  | 0.0185  | 0.802416 |
| Slc35f6       | chr5:30647932-30659731   | 7.3924   | 7.5533   | 0.0311  | 0.765649 |
| Slc4a1ap      | chr5:31526994-31554042   | 14.3041  | 14.5457  | 0.0242  | 0.754140 |
| Tbc1d19       | chr5:53809626-53904380   | 2.1955   | 2.0267   | -0.1155 | 0.557241 |
| Guf1          | chr5:69556923-69575972   | 13.1860  | 13.3860  | 0.0217  | 0.808619 |
| Sgcb          | chr5:73632748-73647713   | 3.4927   | 3.6401   | 0.0596  | 0.793934 |
| Naaa          | chr5:92257658-92278170   | 2.7076   | 2.5248   | -0.1009 | 0.579411 |
| Bmp2k         | chr5:96997688-97091867   | 3.9058   | 3.7104   | -0.0740 | 0.591964 |
| Gm17092       | chr5:99977685-99978858   | 7.7106   | 7.0717   | -0.1248 | 0.671447 |
| Pole          | chr5:110286305-110337474 | 4.0229   | 4.1409   | 0.0417  | 0.805264 |
| Gm26515       | chr5:110779881-110781127 | 2.0638   | 2.2433   | 0.1203  | 0.711706 |
| Tchp          | chr5:114707759-114722327 | 6.3885   | 6.1104   | -0.0642 | 0.202970 |
| Tctn1         | chr5:122241286-122264460 | 10.6914  | 10.9057  | 0.0286  | 0.784780 |
| Fam216a       | chr5:122364579-122372364 | 10.4903  | 10.8302  | 0.0460  | 0.675953 |
| Orai1         | chr5:123015073-123030450 | 13.6121  | 12.9366  | -0.0734 | 0.540954 |
| Psph          | chr5:129765557-129787252 | 7.7023   | 7.3722   | -0.0632 | 0.372656 |
| Tmem248       | chr5:130219743-130243765 | 22.3431  | 21.5592  | -0.0515 | 0.286206 |
| Gm21839       | chr5:135643954-135644336 | 4.2007   | 4.5997   | 0.1309  | 0.484546 |
| Epo           | chr5:137482258-137533242 | 1.0672   | 0.9419   | -0.1802 | 0.548920 |
| Stag3         | chr5:138280239-138312393 | 0.5274   | 0.3974   | -0.4083 | 0.576258 |
| Usp42         | chr5:143710324-143732280 | 8.4115   | 8.5603   | 0.0253  | 0.789202 |
| Pms2          | chr5:143909963-143937309 | 9.3343   | 8.9869   | -0.0547 | 0.283143 |
| Arpc1b        | chr5:145114214-145130705 | 82.6564  | 79.4553  | -0.0570 | 0.453978 |
| Ptcd1         | chr5:145147513-145167108 | 15.2219  | 14.5142  | -0.0687 | 0.517298 |
| N4bp2l1       | chr5:150571642-150594525 | 27.6836  | 28.2276  | 0.0281  | 0.766068 |
| Gm4876        | chr6:17065009-17171833   | 4.3996   | 4.1046   | -0.1001 | 0.636312 |
| Kdm7a         | chr6:39136622-39206789   | 26.5994  | 25.6459  | -0.0527 | 0.427797 |
| Trbv13-2      | chr6:41121416-41121832   | 135.2248 | 138.5242 | 0.0348  | 0.793717 |
| Casp2         | chr6:42264984-42282508   | 18.0379  | 17.3854  | -0.0532 | 0.320658 |
| Zfp775        | chr6:48613179-48623227   | 2.3549   | 2.4523   | 0.0585  | 0.710772 |
| Gars          | chr6:55038000-55079504   | 64.5162  | 65.0797  | 0.0125  | 0.810741 |
| Avl9          | chr6:56714926-56761911   | 24.3182  | 23.4269  | -0.0539 | 0.419240 |
| Smarcad1      | chr6:65042666-65116050   | 16.9111  | 16.2851  | -0.0544 | 0.286412 |
| Gadd45a       | chr6:67035095-67037457   | 2.2531   | 2.4181   | 0.1020  | 0.735155 |
| Tet3          | chr6:83362372-83441678   | 15.1640  | 15.7101  | 0.0510  | 0.825693 |
| Gm5577        | chr6:87980882-88005471   | 1.2027   | 1.2834   | 0.0937  | 0.460683 |
| Brpf1         | chr6:113307180-113324857 | 13.9175  | 13.3978  | -0.0549 | 0.400038 |
| Nop2          | chr6:125131882-125144753 | 38.5618  | 39.2120  | 0.0241  | 0.787609 |
| Fgfr1op2      | chr6:146577202-146599198 | 39.6928  | 38.1703  | -0.0564 | 0.386150 |
| Ndufa3        | chr7:3617372-3620163     | 57.0711  | 58.7064  | 0.0408  | 0.810620 |
| Ppm1n         | chr7:19276806-19280049   | 0.7315   | 0.6275   | -0.2213 | 0.584810 |
| Zfp109        | chr7:24228047-24236632   | 3.4235   | 3.1834   | -0.1049 | 0.456341 |
| Ethe1         | chr7:24587542-24608925   | 4.6006   | 4.8756   | 0.0838  | 0.740533 |
| Rabac1        | chr7:24969749-24972728   | 95.5548  | 90.4490  | -0.0792 | 0.595061 |
| Mir3101       | chr7:27176005-27176093   | 26.0918  | 28.5686  | 0.1308  | 0.633222 |
| Zfp59         | chr7:27842854-27855086   | 3.9322   | 3.6793   | -0.0959 | 0.341054 |
| Fbxo17        | chr7:28716803-28738144   | 1.1544   | 1.2377   | 0.1005  | 0.708210 |
| Spint2        | chr7:29256330-29281977   | 22.9642  | 21.7459  | -0.0786 | 0.590232 |
| Zfp260        | chr7:30094776-30107622   | 31.2330  | 31.7512  | 0.0237  | 0.792103 |
| Gpi1          | chr7:34202121-34230289   | 49.2249  | 50.3063  | 0.0314  | 0.814256 |
| Nkg7          | chr7:43437072-43438246   | 272.4661 | 277.0027 | 0.0238  | 0.819236 |
| Vsig10l       | chr7:43463150-43471913   | 0.2641   | 0.2991   | 0.1795  | 0.656739 |
| Gm26247       | chr7:44248089-44248180   | 39.0636  | 35.3857  | -0.1427 | 0.530283 |
| Med25         | chr7:44879390-44892397   | 11.3793  | 10.6476  | -0.0959 | 0.680348 |
| Sergef        | chr7:46443167-46639807   | 4.2970   | 4.0380   | -0.0897 | 0.457794 |
| 5430400D12Rik | chr7:79920754-79922521   | 0.4274   | 0.4855   | 0.1841  | 0.288511 |
| Ints4         | chr7:97480955-97541397   | 18.8075  | 19.0519  | 0.0186  | 0.766485 |
| Gm9990        | chr7:97720838-97722924   | 1.4348   | 1.2959   | -0.1469 | 0.546627 |
| Gm4980        | chr7:99624066-99627103   | 0.4856   | 0.4168   | -0.2206 | 0.623641 |
| Il21r         | chr7:125603428-125633570 | 74.0785  | 71.2212  | -0.0567 | 0.401732 |
| Atxn2l        | chr7:126491707-126503437 | 18.2330  | 18.6402  | 0.0319  | 0.807300 |
| Rassf7        | chr7:141215859-141218658 | 4.3519   | 4.0678   | -0.0974 | 0.467673 |
| Tpcn2         | chr7:145253922-145283927 | 7.5144   | 7.1422   | -0.0733 | 0.525483 |
| Xab2          | chr8:3608420-3621316     | 30.7174  | 31.1995  | 0.0225  | 0.817889 |
| Ddhd2         | chr8:25725323-25754280   | 18.0250  | 17.3474  | -0.0553 | 0.432668 |
| 1700047A11Rik | chr8:26082608-26102694   | 4.3372   | 3.9124   | -0.1487 | 0.617322 |
| Prosc         | chr8:27042554-27056131   | 11.6927  | 11.2225  | -0.0592 | 0.402728 |
| Rbpms         | chr8:33782642-33929863   | 0.7539   | 0.6913   | -0.1250 | 0.311741 |
| Trappc11      | chr8:47490114-47533470   | 16.2108  | 15.6052  | -0.0549 | 0.304822 |
| Nat2          | chr8:67494866-67502580   | 17.9691  | 18.6336  | 0.0524  | 0.786558 |



|                      |                           |         |         |         |          |
|----------------------|---------------------------|---------|---------|---------|----------|
| <i>Bst2</i>          | chr8:71534263-71537437    | 48.8682 | 50.4235 | 0.0452  | 0.806858 |
| <i>Fam32a</i>        | chr8:72219729-72223764    | 59.5214 | 60.7426 | 0.0293  | 0.828084 |
| <i>Calr3</i>         | chr8:72424175-72443870    | 0.8863  | 0.9640  | 0.1213  | 0.406069 |
| <i>Gm5353</i>        | chr8:76862255-76863048    | 2.7007  | 2.3833  | -0.1803 | 0.638367 |
| <i>Elmod2</i>        | chr8:83312631-83332486    | 3.3514  | 3.4299  | 0.0334  | 0.776632 |
| <i>Tecr</i>          | chr8:83571699-83594491    | 57.1497 | 58.5523 | 0.0350  | 0.813876 |
| <i>4930432K21Rik</i> | chr8:84148024-84172590    | 3.7667  | 3.5054  | -0.1037 | 0.584072 |
| <i>Gadd45gip1</i>    | chr8:84831521-84835482    | 31.1408 | 31.7817 | 0.0294  | 0.795488 |
| <i>Katnb1</i>        | chr8:95081200-95099874    | 9.0366  | 9.3780  | 0.0535  | 0.800128 |
| <i>Csnk2a2</i>       | chr8:95446095-95488820    | 8.5629  | 8.2019  | -0.0622 | 0.305249 |
| <i>Cnot1</i>         | chr8:95719450-95807462    | 55.2902 | 55.7889 | 0.0130  | 0.836701 |
| <i>Cbfb</i>          | chr8:105170673-105217986  | 91.2486 | 92.5933 | 0.0211  | 0.803254 |
| <i>Esrp2</i>         | chr8:106130318-106136974  | 4.4129  | 4.5757  | 0.0523  | 0.796545 |
| <i>Cdh1</i>          | chr8:106603350-106670246  | 1.0604  | 1.2264  | 0.2098  | 0.684718 |
| <i>Nip7</i>          | chr8:107056876-107060926  | 19.2542 | 18.2900 | -0.0741 | 0.571461 |
| <i>Gse1</i>          | chr8:120230535-120581390  | 6.0481  | 5.7029  | -0.0848 | 0.681719 |
| <i>Ntpcr</i>         | chr8:125729962-125748235  | 6.6072  | 6.7812  | 0.0375  | 0.738334 |
| <i>Tmed1</i>         | chr9:21507379-21510186    | 11.4962 | 11.8705 | 0.0462  | 0.735314 |
| <i>Swsap1</i>        | chr9:21955752-21958270    | 5.7174  | 5.3222  | -0.1034 | 0.564955 |
| <i>Idh3a</i>         | chr9:54586510-54604661    | 25.1527 | 25.4839 | 0.0189  | 0.719973 |
| <i>Arid3b</i>        | chr9:57790352-57836793    | 5.0769  | 4.8411  | -0.0686 | 0.541720 |
| <i>Bbs4</i>          | chr9:59321965-59353508    | 6.1855  | 6.3671  | 0.0417  | 0.689443 |
| <i>Snx1</i>          | chr9:66088132-66126587    | 31.0849 | 31.5014 | 0.0192  | 0.795437 |
| <i>Tpm1</i>          | chr9:67022589-67049406    | 8.9852  | 8.6351  | -0.0573 | 0.369146 |
| <i>Gm26767</i>       | chr9:97068182-97073429    | 3.6482  | 3.4256  | -0.0908 | 0.601647 |
| <i>Tmem108</i>       | chr9:103482935-103761837  | 6.3337  | 5.9338  | -0.0941 | 0.617393 |
| <i>Mapkapk3</i>      | chr9:107254926-107289877  | 11.7140 | 11.8863 | 0.0211  | 0.812140 |
| <i>Celsr3</i>        | chr9:108826319-108852963  | 0.1140  | 0.1257  | 0.1411  | 0.582958 |
| <i>Dhx30</i>         | chr9:110084319-110117830  | 14.4457 | 13.8881 | -0.0568 | 0.469493 |
| <i>Nradd</i>         | chr9:110621136-110624393  | 2.8604  | 3.0508  | 0.0930  | 0.665828 |
| <i>Dync1li1</i>      | chr9:114688789-114724302  | 31.8920 | 30.6041 | -0.0595 | 0.495642 |
| <i>Tgfb2</i>         | chr9:116087697-116175363  | 87.2816 | 84.2500 | -0.0510 | 0.391702 |
| <i>Snora62</i>       | chr9:120130414-120130563  | 15.1028 | 13.0704 | -0.2085 | 0.648643 |
| <i>Gm14513</i>       | chrX:11684001-11684124    | 16.1110 | 13.9491 | -0.2079 | 0.691164 |
| <i>Usp9x</i>         | chrX:13071497-13173328    | 29.0549 | 27.9609 | -0.0554 | 0.457364 |
| <i>NA</i>            | chrX:42526584-42529330    | 1.1747  | 1.2480  | 0.0873  | 0.685098 |
| <i>Abcd1</i>         | chrX:73716596-73738534    | 8.4030  | 8.5748  | 0.0292  | 0.803776 |
| <i>Gm7061</i>        | chrX:94772615-94774034    | 1.0036  | 1.1198  | 0.1581  | 0.694511 |
| <i>NA</i>            | chrX:136741857-136743143  | 3.2312  | 3.4563  | 0.0972  | 0.706786 |
| <i>Sat1</i>          | chrX:155213131-155216449  | 26.4488 | 26.9514 | 0.0272  | 0.779196 |
| <i>Gm24041</i>       | chr15:58819322-58819478   | 4.5771  | 5.3042  | 0.2127  | 0.638358 |
| <i>St3gal1</i>       | chr15:67102874-67113992   | 8.7403  | 8.9446  | 0.0333  | 0.799735 |
| <i>Pycl1</i>         | chr15:75916462-75921560   | 10.7419 | 10.0062 | -0.1023 | 0.592189 |
| <i>Oplah</i>         | chr15:76296596-76328015   | 4.5976  | 4.7280  | 0.0403  | 0.764324 |
| <i>Slc52a2</i>       | chr15:76538942-76542130   | 8.4592  | 8.6976  | 0.0401  | 0.793065 |
| <i>St13</i>          | chr15:81363668-81400077   | 39.0328 | 40.1753 | 0.0416  | 0.805122 |
| <i>Xrcc6</i>         | chr15:81987834-82040085   | 14.9796 | 14.4459 | -0.0523 | 0.106679 |
| <i>Smdt1</i>         | chr15:82338958-82349091   | 36.8012 | 38.0142 | 0.0468  | 0.780086 |
| <i>Bik</i>           | chr15:83526861-83544635   | 0.9578  | 1.0835  | 0.1778  | 0.543940 |
| <i>Brd1</i>          | chr15:88687299-88734233   | 20.7019 | 19.9045 | -0.0567 | 0.470694 |
| <i>Lmf2</i>          | chr15:89351003-89355659   | 10.3836 | 10.6474 | 0.0362  | 0.767545 |
| <i>Irak4</i>         | chr15:94543642-94581815   | 10.9325 | 11.0579 | 0.0165  | 0.732012 |
| <i>Senp1</i>         | chr15:98038743-98093744   | 9.5283  | 9.6544  | 0.0190  | 0.796383 |
| <i>Arf3</i>          | chr15:98737620-98763214   | 33.3939 | 31.7953 | -0.0708 | 0.558176 |
| <i>Tuba1a</i>        | chr15:98949840-98953551   | 31.2659 | 29.5040 | -0.0837 | 0.637414 |
| <i>5330439K02Rik</i> | chr15:100459739-100468691 | 1.1496  | 1.0337  | -0.1533 | 0.601465 |
| <i>Calcoco1</i>      | chr15:102706778-102722178 | 8.8434  | 9.0971  | 0.0408  | 0.794181 |
| <i>Ube2e1</i>        | chr14:18282721-18331859   | 6.7327  | 6.9404  | 0.0438  | 0.766744 |
| <i>Tmem110</i>       | chr14:30825589-30876986   | 4.8759  | 4.6247  | -0.0763 | 0.561699 |
| <i>Sh2d4b</i>        | chr14:40813788-40893266   | 0.4675  | 0.4138  | -0.1759 | 0.552019 |
| <i>Osgep</i>         | chr14:50906477-50924893   | 7.0202  | 6.6985  | -0.0677 | 0.387953 |
| <i>Mettl3</i>        | chr14:52294667-52305128   | 29.9741 | 28.9273 | -0.0513 | 0.226426 |
| <i>Oxa1l</i>         | chr14:54360840-54369669   | 20.1550 | 19.1897 | -0.0708 | 0.522979 |
| <i>Acin1</i>         | chr14:54642160-54686931   | 41.9115 | 40.2596 | -0.0580 | 0.519452 |
| <i>4930579G18Rik</i> | chr14:54650510-54654607   | 22.8369 | 21.6549 | -0.0767 | 0.542171 |
| <i>Hmbox1</i>        | chr14:64811600-64949870   | 4.2121  | 4.2900  | 0.0264  | 0.779657 |
| <i>Kctd9</i>         | chr14:67715936-67742310   | 4.5858  | 4.3538  | -0.0749 | 0.593123 |
| <i>Vwa8</i>          | chr14:78849177-79202310   | 5.4149  | 5.5886  | 0.0456  | 0.807703 |
| <i>Bora</i>          | chr14:99046426-99074537   | 6.8977  | 7.0765  | 0.0369  | 0.757259 |
| <i>NA</i>            | chr17:14978863-14991577   | 0.7936  | 0.6989  | -0.1833 | 0.596133 |
| <i>Zfp160</i>        | chr17:21008940-21028852   | 15.4490 | 14.6482 | -0.0768 | 0.574298 |

|               |                          |          |          |         |          |
|---------------|--------------------------|----------|----------|---------|----------|
| Zfp948        | chr17:21567045-21588697  | 3.4241   | 3.5621   | 0.0570  | 0.736714 |
| Gm7805        | chr17:21964135-21964583  | 3.6092   | 4.0274   | 0.1582  | 0.727546 |
| BC003965      | chr17:25184560-25187661  | 14.8264  | 14.1915  | -0.0631 | 0.372785 |
| Gng13         | chr17:25717170-25719406  | 1.5636   | 1.7335   | 0.1488  | 0.574357 |
| Tcp11         | chr17:28066746-28080639  | 1.2902   | 1.4040   | 0.1219  | 0.656910 |
| Rnf8          | chr17:29614789-29703359  | 26.3281  | 26.6163  | 0.0157  | 0.849397 |
| Ndufa7        | chr17:33824590-33838316  | 31.7765  | 32.4927  | 0.0322  | 0.769939 |
| Psmb8         | chr17:34197720-34201454  | 138.2337 | 131.5105 | -0.0719 | 0.591667 |
| Msh5          | chr17:35028604-35046745  | 0.4323   | 0.3907   | -0.1458 | 0.358770 |
| Clic1         | chr17:35049965-35058749  | 121.9893 | 123.7341 | 0.0205  | 0.812315 |
| Tcf19         | chr17:35512733-35516824  | 9.6736   | 10.0000  | 0.0479  | 0.769138 |
| Mrpl14        | chr17:45686321-45698495  | 5.4478   | 5.7929   | 0.0886  | 0.724767 |
| B430306N03Rik | chr17:48316140-48327024  | 2.0011   | 2.0906   | 0.0631  | 0.785488 |
| Gm11110       | chr17:57092034-57105942  | 2.2389   | 2.4204   | 0.1125  | 0.502691 |
| Pja2          | chr17:64281004-64331916  | 12.5831  | 12.7506  | 0.0191  | 0.802803 |
| Ypel5         | chr17:72836703-72851195  | 22.6419  | 23.0651  | 0.0267  | 0.757428 |
| Gm9311        | chr17:73190257-73191685  | 1.1980   | 1.3303   | 0.1511  | 0.657537 |
| Pam16         | chr16:4616463-4624988    | 1.7986   | 1.5345   | -0.2291 | 0.622431 |
| Hmox2         | chr16:4726360-4766742    | 30.2106  | 30.7025  | 0.0233  | 0.780399 |
| Zc3h7a        | chr16:11136591-11176393  | 36.7411  | 35.2868  | -0.0583 | 0.495862 |
| Gm15950       | chr16:13919426-13921399  | 1.5608   | 1.6685   | 0.0963  | 0.678337 |
| Sdf2l1        | chr16:17130137-17132383  | 10.4547  | 9.6369   | -0.1175 | 0.634894 |
| Klhl22        | chr16:17759617-17793382  | 3.8932   | 3.7170   | -0.0668 | 0.314508 |
| Zdhhc8        | chr16:18220753-18235136  | 11.9967  | 11.3810  | -0.0760 | 0.610061 |
| Abcf3         | chr16:20548576-20561379  | 25.5205  | 24.4797  | -0.0601 | 0.463690 |
| Tbccd1        | chr16:22813214-22857569  | 7.9270   | 8.0621   | 0.0244  | 0.691202 |
| Opa1          | chr16:29579333-29654884  | 20.9730  | 20.1792  | -0.0557 | 0.396232 |
| Xxyt1         | chr16:30955626-31081432  | 4.1189   | 4.2478   | 0.0445  | 0.761846 |
| lft57         | chr16:49699232-49765126  | 2.7917   | 2.9192   | 0.0644  | 0.679687 |
| 5330426P16Rik | chr16:50727965-50732743  | 3.0284   | 3.4650   | 0.1943  | 0.730427 |
| 4930453N24Rik | chr16:64751750-64771161  | 38.7211  | 39.2345  | 0.0190  | 0.768284 |
| Cct8          | chr16:87483325-87495873  | 93.6629  | 89.4144  | -0.0670 | 0.545860 |
| Ppp6r3        | chr19:3454932-3575749    | 55.3224  | 55.9043  | 0.0151  | 0.802620 |
| Doc2g         | chr19:4003320-4007005    | 2.1890   | 2.2704   | 0.0527  | 0.434672 |
| Ssh3          | chr19:4261667-4269172    | 4.9699   | 4.6604   | -0.0927 | 0.604971 |
| Gm21844       | chr19:4801511-4805784    | 10.9765  | 10.2163  | -0.1035 | 0.487625 |
| Mrpl49        | chr19:6053629-6057751    | 24.6425  | 23.5984  | -0.0625 | 0.404776 |
| Cox8a         | chr19:7215157-7217616    | 126.9925 | 131.3939 | 0.0492  | 0.785464 |
| Tmem258       | chr19:10204013-10207824  | 32.2577  | 33.1283  | 0.0384  | 0.800351 |
| Cep78         | chr19:15955773-15984989  | 4.4018   | 4.1154   | -0.0971 | 0.582717 |
| Tjp2          | chr19:24094522-24225026  | 0.9465   | 1.0146   | 0.1003  | 0.757378 |
| Uhrf2         | chr19:30030512-30093722  | 18.2236  | 17.4960  | -0.0588 | 0.498366 |
| Pdlim1        | chr19:40221172-40271842  | 9.3844   | 9.5637   | 0.0273  | 0.755721 |
| Pgam1         | chr19:41911870-41918664  | 2.5917   | 2.3984   | -0.1119 | 0.402073 |
| Gpam          | chr19:55069733-55099451  | 5.5571   | 5.6926   | 0.0348  | 0.787120 |
| Rrs1          | chr1:9545407-9547454     | 12.3229  | 11.6417  | -0.0820 | 0.587656 |
| Shhg6         | chr1:9941958-9944118     | 31.9634  | 30.1374  | -0.0849 | 0.626667 |
| Mgat4a        | chr1:37439339-37541016   | 16.5380  | 15.8794  | -0.0586 | 0.488910 |
| Rev1          | chr1:38052786-38129662   | 8.6892   | 8.3266   | -0.0615 | 0.340885 |
| Cnot11        | chr1:39534991-39546881   | 15.6401  | 14.9792  | -0.0623 | 0.461065 |
| Ercc5         | chr1:44147846-44181260   | 12.1469  | 11.6690  | -0.0579 | 0.290713 |
| Slc39a10      | chr1:46807543-46854046   | 5.4733   | 5.1832   | -0.0786 | 0.567361 |
| Stat1         | chr1:52119437-52161865   | 246.2914 | 233.8317 | -0.0749 | 0.628465 |
| Nop58         | chr1:59685005-59711510   | 89.5153  | 91.3310  | 0.0290  | 0.786601 |
| Cul3          | chr1:80264922-80340480   | 63.4768  | 61.1041  | -0.0550 | 0.430189 |
| Cops8         | chr1:90603424-90613341   | 28.3913  | 27.1356  | -0.0653 | 0.489125 |
| Pign          | chr1:105518421-105659008 | 10.9028  | 11.1393  | 0.0310  | 0.819168 |
| 2310035C23Rik | chr1:105663860-105755131 | 27.4677  | 26.4924  | -0.0522 | 0.298472 |
| Steap3        | chr1:120190756-120272705 | 0.3325   | 0.3639   | 0.1302  | 0.675554 |
| Ubxn4         | chr1:128244180-128279377 | 36.5321  | 37.0024  | 0.0185  | 0.769876 |
| Elk4          | chr1:132007606-132032612 | 47.1340  | 47.5006  | 0.0112  | 0.827393 |
| Trove2        | chr1:143750789-143777068 | 2.0713   | 1.9736   | -0.0697 | 0.417361 |
| Fam20b        | chr1:156678544-156719001 | 7.8352   | 7.9323   | 0.0178  | 0.811119 |
| Tada1         | chr1:166379096-166393621 | 10.6828  | 10.1933  | -0.0677 | 0.498607 |
| Usf1          | chr1:171411312-171419142 | 22.4623  | 21.6148  | -0.0555 | 0.280509 |
| Igsf9         | chr1:172481787-172498878 | 0.2207   | 0.1904   | -0.2127 | 0.553979 |
| A430110L20Rik | chr1:181225985-181228498 | 1.9405   | 1.7976   | -0.1104 | 0.459914 |
| Dusp10        | chr1:184013301-184075636 | 29.0581  | 27.6091  | -0.0738 | 0.596847 |
| Gm5687        | chr18:12898426-12899066  | 7.2051   | 6.5767   | -0.1317 | 0.554857 |
| Map3k2        | chr18:32163088-32236751  | 18.3947  | 17.6944  | -0.0560 | 0.440623 |
| Ercc3         | chr18:32240299-32270151  | 19.4886  | 18.7555  | -0.0553 | 0.319074 |

|                      |                          |          |          |         |          |
|----------------------|--------------------------|----------|----------|---------|----------|
| <i>Dnd1</i>          | chr18:36763670-36766214  | 3.1208   | 2.9050   | -0.1034 | 0.563145 |
| <i>Hars</i>          | chr18:36766529-36783205  | 46.1851  | 46.8777  | 0.0215  | 0.794731 |
| <i>Taf7</i>          | chr18:37640901-37644204  | 19.5732  | 20.1762  | 0.0438  | 0.801473 |
| <i>Fem1c</i>         | chr18:46501745-46525971  | 10.7741  | 10.9199  | 0.0194  | 0.788990 |
| <i>Ndst1</i>         | chr18:60685977-60713389  | 8.4101   | 8.5428   | 0.0226  | 0.799792 |
| <i>Gm26202</i>       | chr18:75001879-75001944  | 34.8835  | 38.0852  | 0.1267  | 0.709567 |
| <i>BC031181</i>      | chr18:75005899-75009933  | 36.4116  | 34.4292  | -0.0808 | 0.598432 |
| <i>Timm21</i>        | chr18:84947293-84951524  | 25.7572  | 26.2838  | 0.0292  | 0.767693 |
| <i>Eif3s6-ps2</i>    | chr18:90311824-90312043  | 21.7779  | 23.4251  | 0.1052  | 0.762602 |
| <i>Dclre1c</i>       | chr2:3424130-3464130     | 4.7286   | 4.8338   | 0.0317  | 0.784941 |
| <i>Gm13184</i>       | chr2:3468612-3474546     | 1.1987   | 1.3810   | 0.2042  | 0.684195 |
| <i>Phyh</i>          | chr2:4919018-4938730     | 19.2996  | 19.6577  | 0.0265  | 0.725847 |
| <i>Gm13256</i>       | chr2:9877255-9878869     | 3.0039   | 2.6488   | -0.1815 | 0.620874 |
| <i>NA</i>            | chr2:10047837-10049519   | 1.3365   | 1.2042   | -0.1505 | 0.505597 |
| <i>Gm13340</i>       | chr2:22588102-22589647   | 3.0503   | 2.8133   | -0.1167 | 0.479663 |
| <i>Wdr5</i>          | chr2:27515156-27536535   | 17.9060  | 18.1358  | 0.0184  | 0.731095 |
| <i>Gle1</i>          | chr2:29935425-29960371   | 10.8204  | 10.4225  | -0.0541 | 0.322943 |
| <i>Zdhhc12</i>       | chr2:30090943-30093648   | 5.3003   | 5.5617   | 0.0695  | 0.735430 |
| <i>Neb</i>           | chr2:52136646-52338798   | 1.4474   | 1.3670   | -0.0824 | 0.630552 |
| <i>Nr4a2</i>         | chr2:57106829-57124003   | 0.8382   | 0.7544   | -0.1520 | 0.643923 |
| <i>Gm24996</i>       | chr2:75686739-75686838   | 7.5531   | 8.9191   | 0.2398  | 0.701938 |
| <i>Mdk</i>           | chr2:91929804-91932297   | 1.7901   | 1.6171   | -0.1466 | 0.349893 |
| <i>Gylt1b</i>        | chr2:92365045-92374869   | 0.1826   | 0.1576   | -0.2123 | 0.590008 |
| <i>Apip</i>          | chr2:103073674-103092644 | 6.5973   | 6.1200   | -0.1083 | 0.615199 |
| <i>Chp1</i>          | chr2:119547696-119587027 | 19.4599  | 19.8464  | 0.0284  | 0.783741 |
| <i>Mga</i>           | chr2:119897227-119969581 | 26.8729  | 27.2238  | 0.0187  | 0.824559 |
| <i>Cdan1</i>         | chr2:120716153-120850128 | 5.7993   | 5.5383   | -0.0664 | 0.559147 |
| <i>Cep152</i>        | chr2:125563087-125625113 | 10.5822  | 10.1789  | -0.0561 | 0.269620 |
| <i>Slc52a3</i>       | chr2:151996510-152009258 | 1.9476   | 1.7702   | -0.1378 | 0.642812 |
| <i>Csnk2a1</i>       | chr2:152226838-152281852 | 22.7287  | 23.0277  | 0.0189  | 0.776481 |
| <i>Asx1</i>          | chr2:153345844-153404007 | 17.4580  | 17.8973  | 0.0358  | 0.820590 |
| <i>a</i>             | chr2:154791401-155051012 | 10.0151  | 9.3823   | -0.0942 | 0.561070 |
| <i>Gm16796</i>       | chr2:170499356-170511927 | 0.2536   | 0.2148   | -0.2392 | 0.459824 |
| <i>Impa1</i>         | chr3:10313539-10331439   | 19.1563  | 18.3472  | -0.0623 | 0.435649 |
| <i>Mrpl47</i>        | chr3:32725396-32737147   | 9.1677   | 8.7106   | -0.0738 | 0.529766 |
| <i>Atp11b</i>        | chr3:35754133-35856274   | 54.2788  | 55.2322  | 0.0251  | 0.836532 |
| <i>1700034I23Rik</i> | chr3:40900199-40902501   | 0.5986   | 0.6616   | 0.1442  | 0.604190 |
| <i>Gm16206</i>       | chr3:53452618-53457797   | 3.1022   | 2.8863   | -0.1041 | 0.440024 |
| <i>Gm5538</i>        | chr3:59729785-59752397   | 1.3440   | 1.4764   | 0.1356  | 0.620415 |
| <i>Lrba</i>          | chr3:86224689-86782693   | 26.5609  | 26.9111  | 0.0189  | 0.816311 |
| <i>Hmgb1-ps5</i>     | chr3:95530417-95530974   | 2.3880   | 2.6197   | 0.1336  | 0.475111 |
| <i>Gm12474</i>       | chr3:100489663-100523920 | 1.4285   | 1.2869   | -0.1506 | 0.527899 |
| <i>Ttf2</i>          | chr3:100938859-100969663 | 6.4068   | 6.0602   | -0.0802 | 0.623941 |
| <i>Csde1</i>         | chr3:103020545-103058189 | 133.2975 | 135.6346 | 0.0251  | 0.789272 |
| <i>Gstm4</i>         | chr3:108040407-108044894 | 1.2194   | 1.0821   | -0.1723 | 0.548000 |
| <i>Gm24016</i>       | chr4:3835078-3835146     | 15.5460  | 17.4605  | 0.1676  | 0.639630 |
| <i>Rab2a</i>         | chr4:8535643-8607778     | 51.4210  | 52.5872  | 0.0324  | 0.771249 |
| <i>Rngtt</i>         | chr4:33310310-33502614   | 12.2848  | 11.7998  | -0.0581 | 0.397763 |
| <i>Gm568</i>         | chr4:47008315-47010781   | 2.5899   | 2.8999   | 0.1631  | 0.673849 |
| <i>Gm11488</i>       | chr4:73497614-73498477   | 1.0972   | 0.9271   | -0.2431 | 0.607251 |
| <i>Mysm1</i>         | chr4:94942039-94979100   | 24.7264  | 23.6831  | -0.0622 | 0.525125 |
| <i>E130102H24Rik</i> | chr4:101346530-101356248 | 14.1424  | 14.6344  | 0.0493  | 0.716275 |
| <i>Ccdc30</i>        | chr4:119322892-119415521 | 2.0315   | 1.9120   | -0.0875 | 0.537433 |
| <i>Rragc</i>         | chr4:123917445-123936997 | 17.6277  | 16.9269  | -0.0585 | 0.365404 |
| <i>Zscan20</i>       | chr4:128583538-128610098 | 3.2921   | 3.1488   | -0.0642 | 0.396486 |
| <i>Khdrbs1</i>       | chr4:129703163-129742303 | 28.5993  | 28.9428  | 0.0172  | 0.811069 |
| <i>Sdc3</i>          | chr4:130792536-130826319 | 0.3997   | 0.4450   | 0.1549  | 0.752032 |
| <i>Wdtd1</i>         | chr4:133292458-133353481 | 8.0457   | 7.6391   | -0.0748 | 0.576106 |
| <i>Mfn2</i>          | chr4:147873598-147904704 | 9.0475   | 8.6716   | -0.0612 | 0.482368 |
| <i>Dnajc11</i>       | chr4:151933690-151982137 | 7.1129   | 6.8306   | -0.0584 | 0.382070 |
| <i>Pex10</i>         | chr4:155067015-155072433 | 6.9879   | 6.6567   | -0.0701 | 0.338151 |
| <i>Gm26477</i>       | chr12:90981224-90981547  | 3.3755   | 2.8456   | -0.2464 | 0.570498 |
| <i>Gm6055</i>        | chr14:48079135-48079806  | 1.6369   | 1.3661   | -0.2609 | 0.594805 |
| <i>Gm11935</i>       | chr4:33452490-33452889   | 2.0079   | 1.6977   | -0.2421 | 0.393493 |
| <i>Pat1</i>          | chr19:11912398-11945096  | 10.1529  | 10.3633  | 0.0296  | 0.795852 |
| <i>Mkln1</i>         | chr6:31398734-31516811   | 7.4837   | 7.5724   | 0.0170  | 0.809846 |
| <i>Bcat1</i>         | chr6:144993834-145076184 | 0.3862   | 0.4070   | 0.0759  | 0.673326 |
| <i>Slmo2</i>         | chr2:174465066-174473081 | 22.0688  | 22.5592  | 0.0317  | 0.788486 |
| <i>Sys1</i>          | chr2:164456963-164479638 | 10.3368  | 9.9344   | -0.0573 | 0.402180 |
| <i>Tiam2</i>         | chr17:3326572-3519397    | 0.5296   | 0.5628   | 0.0877  | 0.636274 |
| <i>Tagap</i>         | chr17:7925999-7934897    | 47.6850  | 45.7258  | -0.0605 | 0.538577 |

|                      |                           |          |          |         |          |
|----------------------|---------------------------|----------|----------|---------|----------|
| <i>C330006A16Rik</i> | chr2:26136813-26140521    | 15.3051  | 14.5331  | -0.0747 | 0.594985 |
| <i>2500002B13Rik</i> | chr8:57488053-57508877    | 0.5644   | 0.6133   | 0.1199  | 0.618243 |
| <i>Gm14586</i>       | chrX:52772341-52772749    | 6.1401   | 6.5465   | 0.0925  | 0.621555 |
| <i>Ppif</i>          | chr14:25694153-25700468   | 6.5672   | 6.6819   | 0.0250  | 0.727083 |
| <i>1700021A07Rik</i> | chr10:21425341-21425650   | 8.6007   | 7.8102   | -0.1391 | 0.528369 |
| <i>Zbtb24</i>        | chr10:41450395-41465571   | 18.3737  | 17.6444  | -0.0584 | 0.384860 |
| <i>Mcm9</i>          | chr10:53536328-53630439   | 8.6102   | 8.7332   | 0.0205  | 0.745895 |
| <i>Dohh</i>          | chr10:81384427-81391560   | 10.0026  | 10.2525  | 0.0356  | 0.811156 |
| <i>Tdg</i>           | chr10:82629827-82650799   | 1.7505   | 1.8185   | 0.0549  | 0.762362 |
| <i>Ndufa12</i>       | chr10:94198954-94221443   | 14.2906  | 14.7260  | 0.0433  | 0.795467 |
| <i>Ikzf4</i>         | chr10:128630842-128645991 | 0.6617   | 0.6947   | 0.0703  | 0.659002 |
| <i>Gm24313</i>       | chr11:6619807-6619940     | 5.9887   | 5.1150   | -0.2275 | 0.542723 |
| <i>Fam161a</i>       | chr11:23007530-23030788   | 0.1608   | 0.1883   | 0.2280  | 0.644186 |
| <i>Rel</i>           | chr11:23741513-23770970   | 6.9845   | 7.1654   | 0.0369  | 0.787098 |
| <i>Pigl</i>          | chr11:62458459-62514417   | 4.2172   | 3.9472   | -0.0955 | 0.595370 |
| <i>Vamp2</i>         | chr11:69088489-69092384   | 5.8524   | 6.0151   | 0.0396  | 0.793411 |
| <i>Nlgn2</i>         | chr11:69823121-69837784   | 0.2334   | 0.2571   | 0.1396  | 0.654892 |
| <i>Kif1c</i>         | chr11:70700547-70731964   | 8.8751   | 8.4337   | -0.0736 | 0.642834 |
| <i>Gm11527</i>       | chr11:95858161-95859174   | 1.4243   | 1.6007   | 0.1685  | 0.481230 |
| <i>Med1</i>          | chr11:98152153-98193293   | 22.6896  | 22.7973  | 0.0068  | 0.788569 |
| <i>Vps25</i>         | chr11:101253706-101259549 | 22.7050  | 23.1237  | 0.0264  | 0.811689 |
| <i>Bptf</i>          | chr11:107033080-107132127 | 32.9492  | 31.7735  | -0.0524 | 0.505418 |
| <i>Trim65</i>        | chr11:116121845-116131128 | 6.1035   | 5.8206   | -0.0685 | 0.575025 |
| <i>Actg1</i>         | chr11:120345689-120348542 | 11.4503  | 10.9046  | -0.0704 | 0.565464 |
| <i>Itgb1bp1</i>      | chr12:21240824-21286237   | 13.2665  | 12.6848  | -0.0647 | 0.522753 |
| <i>Acp1</i>          | chr12:30893325-30911612   | 5.3468   | 5.5029   | 0.0415  | 0.784496 |
| <i>Hdac9</i>         | chr12:34371502-34528889   | 0.4546   | 0.4941   | 0.1204  | 0.718203 |
| <i>Brms1l</i>        | chr12:55836365-55869735   | 13.5410  | 13.0143  | -0.0572 | 0.200179 |
| <i>Zbtb25</i>        | chr12:76347781-76369602   | 11.2466  | 11.4877  | 0.0306  | 0.790497 |
| <i>Arg2</i>          | chr12:79130776-79156301   | 1.6829   | 1.8020   | 0.0987  | 0.667386 |
| <i>Eif2b2</i>        | chr12:85219480-85226628   | 25.5480  | 24.4942  | -0.0608 | 0.469511 |
| <i>Gm20682</i>       | chr12:99292607-99296620   | 0.5064   | 0.5673   | 0.1639  | 0.756324 |
| <i>Glrx5</i>         | chr12:105032688-105040910 | 26.8454  | 25.4835  | -0.0751 | 0.574961 |
| <i>Wars</i>          | chr12:108860029-108894174 | 24.6125  | 24.8262  | 0.0125  | 0.850502 |
| <i>Gtpbp4</i>        | chr13:8972070-8996017     | 48.4103  | 46.2998  | -0.0643 | 0.579954 |
| <i>Mtr</i>           | chr13:12186541-12258113   | 19.1399  | 18.4481  | -0.0531 | 0.379011 |
| <i>1110007C09Rik</i> | chr13:49202950-49216026   | 19.1736  | 19.8418  | 0.0494  | 0.783965 |
| <i>Gm3604</i>        | chr13:62368862-62371936   | 2.7348   | 2.4946   | -0.1327 | 0.633731 |
| <i>Ercc6l2</i>       | chr13:63815239-63900302   | 8.5884   | 8.2574   | -0.0567 | 0.418311 |
| <i>Rsl1</i>          | chr13:67173206-67183126   | 11.5263  | 10.9620  | -0.0724 | 0.519803 |
| <i>lpo11</i>         | chr13:106794438-106936915 | 13.2022  | 12.6872  | -0.0574 | 0.398298 |
| <i>Gm7120</i>        | chr13:119487940-119610458 | 0.4546   | 0.4028   | -0.1744 | 0.603585 |
| <i>Zfp131</i>        | chr13:119765186-119790805 | 37.9646  | 36.4731  | -0.0578 | 0.481474 |
| <i>Tmem214</i>       | chr5:30869578-30879191    | 9.6939   | 9.3620   | -0.0503 | 0.149568 |
| <i>Acox3</i>         | chr5:35583039-35613801    | 8.0564   | 7.7603   | -0.0540 | 0.458735 |
| <i>Pacrgl</i>        | chr5:48372391-48388756    | 4.6123   | 4.7757   | 0.0502  | 0.608189 |
| <i>2010109A12Rik</i> | chr5:93206517-93213475    | 1.9701   | 1.7145   | -0.2005 | 0.640259 |
| <i>Zfp932</i>        | chr5:109996520-110010411  | 5.4575   | 5.1405   | -0.0863 | 0.651159 |
| <i>Gm26711</i>       | chr5:110385834-110388073  | 0.7156   | 0.7890   | 0.1409  | 0.673362 |
| <i>Cox6a1</i>        | chr5:115345641-115348981  | 97.7792  | 92.9019  | -0.0738 | 0.600151 |
| <i>Sh2b3</i>         | chr5:121815487-121836859  | 13.5415  | 13.7853  | 0.0257  | 0.827130 |
| <i>Denr</i>          | chr5:123907174-123928832  | 15.7980  | 16.3273  | 0.0475  | 0.807492 |
| <i>Zfp11</i>         | chr5:129654592-129670099  | 1.1357   | 1.0465   | -0.1179 | 0.609697 |
| <i>Stx1a</i>         | chr5:135023481-135051100  | 7.7860   | 7.9440   | 0.0290  | 0.747748 |
| <i>Wbscr22</i>       | chr5:135052956-135064959  | 12.7994  | 12.2519  | -0.0631 | 0.445337 |
| <i>Ap5z1</i>         | chr5:142463930-142478715  | 7.7701   | 7.4283   | -0.0649 | 0.519883 |
| <i>Pon2</i>          | chr6:5264146-5298455      | 11.1029  | 11.2583  | 0.0201  | 0.790817 |
| <i>Bpgm</i>          | chr6:34476206-34505613    | 6.8572   | 7.0421   | 0.0384  | 0.795036 |
| <i>Pdia4</i>         | chr6:47796141-47813512    | 67.8089  | 68.7790  | 0.0205  | 0.847803 |
| <i>Chmp3</i>         | chr6:71543796-71582609    | 30.5208  | 30.9715  | 0.0211  | 0.799207 |
| <i>Mthfd2</i>        | chr6:83305690-83317606    | 15.0474  | 14.3912  | -0.0643 | 0.515479 |
| <i>Cml1</i>          | chr6:85910153-85915687    | 4.0852   | 4.2478   | 0.0563  | 0.633214 |
| <i>Plxnd1</i>        | chr6:115954810-115995005  | 0.1366   | 0.1166   | -0.2281 | 0.585153 |
| <i>Zfp637</i>        | chr6:117841179-117845956  | 5.4730   | 5.1908   | -0.0764 | 0.433588 |
| <i>Grccl0</i>        | chr6:124739182-124741374  | 66.2383  | 68.1432  | 0.0409  | 0.819262 |
| <i>Gm26656</i>       | chr6:128843785-128846959  | 0.7680   | 0.8388   | 0.1272  | 0.752803 |
| <i>Napa</i>          | chr7:16098457-16117975    | 21.8368  | 22.0393  | 0.0133  | 0.790930 |
| <i>D930028M14Rik</i> | chr7:25152456-25156623    | 8.0618   | 8.4072   | 0.0605  | 0.753946 |
| <i>Erf</i>           | chr7:25242560-25250761    | 7.3963   | 6.9551   | -0.0887 | 0.677726 |
| <i>Cic</i>           | chr7:25267703-25294159    | 8.6675   | 8.9797   | 0.0510  | 0.827529 |
| <i>Snord35b</i>      | chr7:45123024-45123111    | 318.2196 | 301.3719 | -0.0785 | 0.645622 |

|                      |                           |          |          |         |          |
|----------------------|---------------------------|----------|----------|---------|----------|
| <i>Snrnp70</i>       | chr7:45376461-45395692    | 180.4566 | 173.8267 | -0.0540 | 0.476456 |
| <i>Ruvbl2</i>        | chr7:45421851-45438096    | 21.0546  | 20.1133  | -0.0660 | 0.547808 |
| <i>Gys1</i>          | chr7:45434843-45456619    | 2.5395   | 2.6134   | 0.0413  | 0.736664 |
| <i>9330171B17Rik</i> | chr7:79710370-79712357    | 1.0477   | 1.1478   | 0.1317  | 0.726038 |
| <i>Zfp710</i>        | chr7:80024813-80092751    | 8.3655   | 8.0026   | -0.0640 | 0.578296 |
| <i>Zfp592</i>        | chr7:80993680-81045164    | 19.6805  | 18.8035  | -0.0658 | 0.616225 |
| <i>Fam160a2</i>      | chr7:105371210-105400054  | 3.5027   | 3.3528   | -0.0631 | 0.556356 |
| <i>Nrip3</i>         | chr7:109758054-109782025  | 1.4673   | 1.3611   | -0.1084 | 0.564659 |
| <i>Ctr9</i>          | chr7:111028950-111056377  | 20.3233  | 20.5276  | 0.0144  | 0.821695 |
| <i>Zfp747</i>        | chr7:127372563-127376050  | 9.1031   | 8.5629   | -0.0883 | 0.639026 |
| <i>4932443L11Rik</i> | chr8:4162521-4206882      | 0.4652   | 0.5061   | 0.1216  | 0.245960 |
| <i>Lig4</i>          | chr8:9970019-9977686      | 2.8194   | 2.6787   | -0.0739 | 0.232673 |
| <i>C330011M18Rik</i> | chr8:84065235-84067287    | 6.9212   | 6.5125   | -0.0878 | 0.620129 |
| <i>Rnaseh2a</i>      | chr8:84956609-84969767    | 10.6460  | 10.2084  | -0.0606 | 0.401418 |
| <i>Ctcf</i>          | chr8:105636567-105682922  | 49.7762  | 50.1111  | 0.0097  | 0.813517 |
| <i>Sf3b3</i>         | chr8:110810491-110846803  | 77.9094  | 75.4848  | -0.0456 | 0.293597 |
| <i>Elof1</i>         | chr9:22112988-22117148    | 23.1855  | 24.0776  | 0.0545  | 0.800606 |
| <i>Rnf214</i>        | chr9:45863424-45906894    | 7.3311   | 7.4416   | 0.0216  | 0.781462 |
| <i>Snx33</i>         | chr9:56917199-56928371    | 7.5092   | 7.1753   | -0.0656 | 0.508445 |
| <i>Calml4</i>        | chr9:62858103-62875918    | 1.2357   | 1.3865   | 0.1661  | 0.741142 |
| <i>Mthfsl</i>        | chr9:88688604-88719798    | 4.0161   | 4.2282   | 0.0743  | 0.506633 |
| <i>Vprbp</i>         | chr9:106821873-106883318  | 25.8299  | 25.9716  | 0.0079  | 0.828364 |
| <i>Tusc2</i>         | chr9:107563254-107566108  | 19.4895  | 19.9981  | 0.0372  | 0.785797 |
| <i>Arih2</i>         | chr9:108602941-108649380  | 19.6513  | 18.9501  | -0.0524 | 0.365218 |
| <i>Ulk4</i>          | chr9:120960267-121277197  | 4.2618   | 4.0830   | -0.0619 | 0.460501 |
| <i>Xcr1</i>          | chr9:123852314-123862029  | 0.5046   | 0.4495   | -0.1670 | 0.637452 |
| <i>Bcor</i>          | chrX:12036739-12160355    | 16.1954  | 15.6123  | -0.0529 | 0.483300 |
| <i>Slc25a5</i>       | chrX:36795650-36798807    | 70.6953  | 67.3554  | -0.0698 | 0.574702 |
| <i>Cd99l2</i>        | chrX:71420059-71492849    | 3.2112   | 3.0382   | -0.0799 | 0.524768 |
| <i>Avpr2</i>         | chrX:73892101-73895502    | 40.6759  | 40.9924  | 0.0112  | 0.857157 |
| <i>Gm9143</i>        | chrX:103037623-103038368  | 1.2559   | 1.4243   | 0.1815  | 0.634704 |
| <i>Rlim</i>          | chrX:103957162-103981284  | 39.0375  | 39.2180  | 0.0067  | 0.826347 |
| <i>Trmt2b</i>        | chrX:134222338-134276984  | 9.6419   | 9.2396   | -0.0615 | 0.434862 |
| <i>Armxc3</i>        | chrX:134756594-134761455  | 0.7542   | 0.6836   | -0.1417 | 0.544542 |
| <i>3632454L22Rik</i> | chrX:135022733-135060336  | 0.9390   | 0.9819   | 0.0644  | 0.733159 |
| <i>Gm26035</i>       | chrX:152923452-152923760  | 5.9377   | 6.5007   | 0.1307  | 0.767465 |
| <i>Ebag9</i>         | chr15:44619640-44641024   | 17.1896  | 17.5462  | 0.0296  | 0.796118 |
| <i>Med30</i>         | chr15:52712444-52730431   | 40.2473  | 38.4208  | -0.0670 | 0.510174 |
| <i>Josd1</i>         | chr15:79674249-79687872   | 8.8789   | 8.5036   | -0.0623 | 0.443771 |
| <i>Mkl1</i>          | chr15:81012280-81190757   | 16.4959  | 17.1242  | 0.0539  | 0.831302 |
| <i>Pmm1</i>          | chr15:81951107-81960930   | 4.0213   | 4.1778   | 0.0551  | 0.779128 |
| <i>Phf21b</i>        | chr15:84785380-84856049   | 0.9103   | 0.9627   | 0.0808  | 0.708582 |
| <i>Smagp</i>         | chr15:100621341-100636865 | 0.7106   | 0.6098   | -0.2206 | 0.342709 |
| <i>Nfe2</i>          | chr15:103248211-103258403 | 0.3854   | 0.4223   | 0.1319  | 0.320984 |
| <i>Pxk</i>           | chr14:8098212-8165111     | 19.3466  | 19.5734  | 0.0168  | 0.734469 |
| <i>Mapk1ip1l</i>     | chr14:47298313-47323204   | 12.0011  | 12.1919  | 0.0228  | 0.819780 |
| <i>Traj41</i>        | chr14:54176270-54176325   | 25.5256  | 22.5801  | -0.1769 | 0.426378 |
| <i>Pck2</i>          | chr14:55540265-55550017   | 1.7089   | 1.7914   | 0.0681  | 0.689166 |
| <i>Sucla2</i>        | chr14:73525318-73596142   | 16.5584  | 16.7942  | 0.0204  | 0.809753 |
| <i>Tbp</i>           | chr17:15499887-15528379   | 11.4516  | 11.5780  | 0.0158  | 0.810125 |
| <i>3110052M02Rik</i> | chr17:21657581-21662540   | 6.0828   | 5.6919   | -0.0958 | 0.575866 |
| <i>Fahd1</i>         | chr17:24848895-24850302   | 3.3330   | 3.5422   | 0.0878  | 0.766717 |
| <i>Mir3082</i>       | chr17:25831364-25831428   | 84.1276  | 88.0284  | 0.0654  | 0.647372 |
| <i>Gm26885</i>       | chr17:29461895-29491925   | 16.2755  | 17.0047  | 0.0632  | 0.822177 |
| <i>Gm26549</i>       | chr17:32284786-32298689   | 5.0424   | 4.7062   | -0.0995 | 0.446285 |
| <i>Zfp563</i>        | chr17:33089309-33106203   | 4.4408   | 4.1663   | -0.0921 | 0.562360 |
| <i>Hsp90ab1</i>      | chr17:45567774-45573271   | 327.6004 | 313.9458 | -0.0614 | 0.552451 |
| <i>Oard1</i>         | chr17:48410013-48417266   | 30.1027  | 30.7334  | 0.0299  | 0.828321 |
| <i>Safb</i>          | chr17:56584824-56606294   | 19.1852  | 18.4813  | -0.0539 | 0.498466 |
| <i>Alkbh7</i>        | chr17:56997338-56999322   | 7.3665   | 6.9168   | -0.0909 | 0.466740 |
| <i>Ralbp1</i>        | chr17:65848432-65885755   | 35.2776  | 33.7490  | -0.0639 | 0.565033 |
| <i>Mcf2</i>          | chr17:87254657-87265935   | 10.7186  | 10.2567  | -0.0635 | 0.313436 |
| <i>Gm15558</i>       | chr16:10669247-10683539   | 0.4292   | 0.3662   | -0.2291 | 0.686998 |
| <i>2610020C07Rik</i> | chr16:11203382-11225796   | 6.9256   | 6.5833   | -0.0731 | 0.547684 |
| <i>Gm6630</i>        | chr16:23179555-23180011   | 2.6424   | 2.3321   | -0.1802 | 0.593025 |
| <i>Gm15658</i>       | chr16:33770429-33787112   | 3.8626   | 4.1959   | 0.1194  | 0.757758 |
| <i>Gm15829</i>       | chr16:33966238-33967312   | 5.6782   | 5.9853   | 0.0760  | 0.772050 |
| <i>Gart</i>          | chr16:91621185-91646952   | 44.0059  | 42.4270  | -0.0527 | 0.403228 |
| <i>Aip</i>           | chr19:4114445-4125858     | 25.8521  | 26.4214  | 0.0314  | 0.814173 |
| <i>BC048609</i>      | chr19:6080032-6080788     | 4.8847   | 4.4012   | -0.1504 | 0.608183 |
| <i>Arl2</i>          | chr19:6134373-6141406     | 6.0327   | 5.7578   | -0.0673 | 0.423474 |

|                      |                           |          |          |         |          |
|----------------------|---------------------------|----------|----------|---------|----------|
| <i>Wdr74</i>         | chr19:8735838-8740623     | 40.9674  | 39.2026  | -0.0635 | 0.506952 |
| <i>Zbtb3</i>         | chr19:8802529-8804854     | 1.5935   | 1.6947   | 0.0889  | 0.699600 |
| <i>Gm10143</i>       | chr19:10198367-10202384   | 10.9172  | 11.0543  | 0.0180  | 0.765471 |
| <i>Smarca2</i>       | chr19:26605114-26778321   | 24.8782  | 25.0542  | 0.0102  | 0.833409 |
| <i>Dntt</i>          | chr19:41029274-41059523   | 4.7764   | 4.3549   | -0.1333 | 0.718916 |
| <i>Poll</i>          | chr19:45552274-45560531   | 6.6940   | 6.2790   | -0.0923 | 0.612177 |
| <i>Kcnp2</i>         | chr19:45791838-45816061   | 0.8138   | 0.8662   | 0.0901  | 0.595508 |
| <i>Uggt1</i>         | chr1:36141529-36244305    | 42.4961  | 40.8869  | -0.0557 | 0.551903 |
| <i>Tsga10</i>        | chr1:37754571-37865298    | 0.5920   | 0.6232   | 0.0740  | 0.744408 |
| <i>1700019D03Rik</i> | chr1:52922323-52963260    | 0.1835   | 0.2097   | 0.1931  | 0.620917 |
| <i>Fastkd2</i>       | chr1:63730613-63754655    | 8.0096   | 7.6700   | -0.0625 | 0.495652 |
| <i>Gm26649</i>       | chr1:64029462-64032927    | 6.1116   | 6.2838   | 0.0401  | 0.768398 |
| <i>Gm13748</i>       | chr1:64078653-64090782    | 2.5013   | 2.7573   | 0.1406  | 0.448651 |
| <i>Mettl21a</i>      | chr1:64606472-64617242    | 8.1704   | 7.8265   | -0.0620 | 0.245509 |
| <i>Atg9a</i>         | chr1:75180865-75191923    | 7.4780   | 7.6528   | 0.0333  | 0.804001 |
| <i>Tm4sf20</i>       | chr1:82756648-82768461    | 1.3303   | 1.1965   | -0.1530 | 0.547926 |
| <i>G530012D18Rik</i> | chr1:85575675-85577295    | 47.9079  | 45.3427  | -0.0794 | 0.582524 |
| <i>St8sia4</i>       | chr1:95587683-95667594    | 27.3777  | 27.9240  | 0.0285  | 0.819219 |
| <i>Gm3531</i>        | chr1:97948900-97949389    | 9.5544   | 8.7158   | -0.1325 | 0.639369 |
| <i>Klh12</i>         | chr1:134455530-134491018  | 5.1157   | 4.9032   | -0.0612 | 0.327374 |
| <i>Gm26598</i>       | chr1:136622097-136624650  | 0.3465   | 0.2923   | -0.2455 | 0.631828 |
| <i>Xpr1</i>          | chr1:155275700-155417415  | 6.3046   | 6.3841   | 0.0181  | 0.804503 |
| <i>NA</i>            | chr1:167223826-167223919  | 57.4321  | 53.2184  | -0.1099 | 0.578557 |
| <i>Iars2</i>         | chr1:185284725-185329396  | 18.2560  | 18.4507  | 0.0153  | 0.866121 |
| <i>Kctd3</i>         | chr1:188971097-189007840  | 5.8653   | 6.0135   | 0.0360  | 0.771944 |
| <i>Elp2</i>          | chr18:24603960-24638830   | 42.1004  | 40.6455  | -0.0507 | 0.297785 |
| <i>Smim3</i>         | chr18:60474192-60501983   | 0.7523   | 0.8278   | 0.1381  | 0.690523 |
| <i>Stam</i>          | chr2:14074099-14148338    | 6.7817   | 6.5102   | -0.0590 | 0.304479 |
| <i>Golga2</i>        | chr2:32287383-32307921    | 15.3413  | 15.5476  | 0.0193  | 0.834182 |
| <i>Stk39</i>         | chr2:68210444-68472268    | 3.6163   | 3.7143   | 0.0386  | 0.809556 |
| <i>Hnrmpa3</i>       | chr2:75659260-75669407    | 4.4656   | 4.2562   | -0.0693 | 0.553702 |
| <i>Gm17661</i>       | chr2:90917642-90917914    | 2.7938   | 3.1802   | 0.1869  | 0.629986 |
| <i>Ciao1</i>         | chr2:127240937-127247816  | 20.7287  | 19.8753  | -0.0607 | 0.479488 |
| <i>Nop56</i>         | chr2:130274429-130279313  | 41.3445  | 41.4873  | 0.0050  | 0.840174 |
| <i>Ap5s1</i>         | chr2:131207077-131213514  | 6.2267   | 5.8638   | -0.0867 | 0.536106 |
| <i>Sdcbp2</i>        | chr2:151572621-151590005  | 2.7836   | 2.9810   | 0.0989  | 0.755848 |
| <i>Plagl2</i>        | chr2:153227758-153241426  | 4.2310   | 4.0318   | -0.0696 | 0.559016 |
| <i>Gm14276</i>       | chr2:156994234-156994891  | 1.9798   | 2.1832   | 0.1411  | 0.569792 |
| <i>Eya2</i>          | chr2:165595031-165771727  | 6.5374   | 6.1480   | -0.0886 | 0.638313 |
| <i>Ctsz</i>          | chr2:174427492-174439039  | 23.9816  | 24.5604  | 0.0344  | 0.811173 |
| <i>Lama5</i>         | chr2:180176372-180225859  | 0.1547   | 0.1672   | 0.1120  | 0.568195 |
| <i>Mir3091</i>       | chr2:180257535-180257611  | 13.8721  | 12.0738  | -0.2003 | 0.472078 |
| <i>Gm24786</i>       | chr3:9829619-9829728      | 17.5903  | 19.2172  | 0.1276  | 0.693045 |
| <i>Lxn</i>           | chr3:67457997-67463926    | 3.0014   | 2.7811   | -0.1100 | 0.510397 |
| <i>Tmem154</i>       | chr3:84666191-84704575    | 2.9628   | 3.0755   | 0.0539  | 0.773879 |
| <i>Rps27</i>         | chr3:90212724-90213615    | 15.9029  | 14.4158  | -0.1416 | 0.612589 |
| <i>Mcl1</i>          | chr3:95658720-95663176    | 204.5837 | 197.8376 | -0.0484 | 0.310194 |
| <i>Terc</i>          | chr3:96414436-96414859    | 70.1540  | 72.2753  | 0.0430  | 0.819649 |
| <i>Fam46c</i>        | chr3:100451627-100489324  | 14.5557  | 14.8927  | 0.0330  | 0.838842 |
| <i>Hint2</i>         | chr4:43654226-43656466    | 5.9907   | 5.6264   | -0.0905 | 0.545311 |
| <i>Map7d1</i>        | chr4:126232166-126256343  | 13.0071  | 12.3537  | -0.0744 | 0.663117 |
| <i>Zmym6</i>         | chr4:127077382-127124372  | 7.4127   | 7.1378   | -0.0545 | 0.310591 |
| <i>Gm26615</i>       | chr4:133085473-133089146  | 1.1851   | 1.2545   | 0.0821  | 0.748923 |
| <i>Aunip</i>         | chr4:134510998-134523927  | 1.0012   | 0.8754   | -0.1937 | 0.613879 |
| <i>Hnrnpr</i>        | chr4:136310941-136342968  | 24.4731  | 24.6576  | 0.0108  | 0.797108 |
| <i>Gm8566</i>        | chr6:67205618-67206083    | 1.4059   | 1.6592   | 0.2390  | 0.702594 |
| <i>Clec11a</i>       | chr7:44303769-44306959    | 1.4122   | 1.2887   | -0.1320 | 0.591476 |
| <i>NA</i>            | chr1:137928169-137930273  | 0.3741   | 0.4199   | 0.1669  | 0.618769 |
| <i>Zdhhc21</i>       | chr4:82798737-82859958    | 5.9450   | 5.6960   | -0.0617 | 0.555727 |
| <i>Laptm5</i>        | chr4:130913124-130936141  | 144.6535 | 138.6433 | -0.0612 | 0.603379 |
| <i>Fxr2</i>          | chr11:69632989-69653297   | 20.9547  | 20.1907  | -0.0536 | 0.415067 |
| <i>4732440D04Rik</i> | chr1:6213292-6214590      | 12.1545  | 12.6560  | 0.0583  | 0.587079 |
| <i>Armc8</i>         | chr9:99478390-99568899    | 18.0669  | 18.2450  | 0.0141  | 0.835768 |
| <i>Cct5</i>          | chr15:31590799-31601847   | 152.4488 | 145.5729 | -0.0666 | 0.606428 |
| <i>Cpsf2</i>         | chr12:101975973-102005993 | 19.4943  | 18.7976  | -0.0525 | 0.377206 |
| <i>Smim20</i>        | chr5:53267105-53283510    | 4.1223   | 4.1893   | 0.0233  | 0.766689 |
| <i>Plbd2</i>         | chr5:120483281-120503625  | 2.4909   | 2.5809   | 0.0512  | 0.812832 |
| <i>Gtf2a2</i>        | chr9:70012549-70022866    | 14.9911  | 14.3733  | -0.0607 | 0.484604 |
| <i>BC065403</i>      | chr9:72361734-72409943    | 12.9233  | 12.2517  | -0.0770 | 0.530210 |
| <i>Ubr3</i>          | chr2:69897245-70024013    | 14.2935  | 13.7757  | -0.0532 | 0.488442 |
| <i>Aes</i>           | chr10:81559493-81566362   | 232.9661 | 238.2511 | 0.0324  | 0.838147 |

|                      |                           |          |          |         |          |
|----------------------|---------------------------|----------|----------|---------|----------|
| <i>Rnf130</i>        | chr11:50025345-50104758   | 20.4282  | 20.8395  | 0.0288  | 0.804264 |
| <i>Eme1</i>          | chr11:94644995-94653964   | 4.4047   | 4.1502   | -0.0859 | 0.610206 |
| <i>Hpcal1</i>        | chr12:17690813-17791926   | 47.1282  | 45.1285  | -0.0626 | 0.550745 |
| <i>Dicer1</i>        | chr12:104687741-104751952 | 19.4964  | 18.7070  | -0.0596 | 0.599661 |
| <i>Tbce</i>          | chr13:13997948-14039638   | 22.5212  | 21.6146  | -0.0593 | 0.553080 |
| <i>Dusp22</i>        | chr13:30659998-30711231   | 3.6724   | 3.4382   | -0.0951 | 0.450919 |
| <i>Gm26756</i>       | chr5:67427679-67437990    | 1.6445   | 1.4869   | -0.1454 | 0.550060 |
| <i>Gatc</i>          | chr5:115333241-115341178  | 12.3509  | 11.8258  | -0.0627 | 0.377803 |
| <i>AI480526</i>      | chr5:123133722-123141666  | 7.8448   | 7.4673   | -0.0711 | 0.628026 |
| <i>Gm15624</i>       | chr6:83166151-83172733    | 1.5400   | 1.4182   | -0.1189 | 0.607533 |
| <i>Plbd1</i>         | chr6:136612069-136661928  | 1.0491   | 1.1198   | 0.0941  | 0.747173 |
| <i>Gm26853</i>       | chr8:19789797-19798548    | 0.2086   | 0.2340   | 0.1663  | 0.515125 |
| <i>Fam76b</i>        | chr9:13827715-13846541    | 28.1673  | 28.4015  | 0.0119  | 0.833389 |
| <i>Csnk1g1</i>       | chr9:65908973-66045009    | 8.1083   | 8.2407   | 0.0234  | 0.842080 |
| <i>1190002N15Rik</i> | chr9:94517863-94538081    | 10.5018  | 10.7019  | 0.0272  | 0.817581 |
| <i>Maaa</i>          | chrX:16619697-16687818    | 0.1732   | 0.1981   | 0.1933  | 0.641906 |
| <i>Wdr44</i>         | chrX:23693050-23806025    | 5.0981   | 5.1687   | 0.0198  | 0.805874 |
| <i>A230072E10Rik</i> | chrX:151291973-151344846  | 3.4189   | 3.2511   | -0.0726 | 0.605856 |
| <i>Rac2</i>          | chr15:78559168-78572783   | 217.5730 | 220.4912 | 0.0192  | 0.848927 |
| <i>Egr3</i>          | chr14:70077444-70080157   | 1.8458   | 1.9688   | 0.0931  | 0.675221 |
| <i>Ergic1</i>        | chr17:26561488-26656931   | 4.0695   | 4.1430   | 0.0258  | 0.785683 |
| <i>H2-Ob</i>         | chr17:34238902-34245907   | 19.4400  | 19.7661  | 0.0240  | 0.828692 |
| <i>Polr2h</i>        | chr16:20717664-20722267   | 13.1556  | 12.2842  | -0.0989 | 0.650340 |
| <i>Usp40</i>         | chr1:87945120-88008551    | 11.0959  | 10.6343  | -0.0613 | 0.525771 |
| <i>Mia3</i>          | chr1:183326724-183369529  | 43.5237  | 42.0328  | -0.0503 | 0.469031 |
| <i>Tmem206</i>       | chr1:191325911-191350914  | 7.2411   | 6.8813   | -0.0735 | 0.558176 |
| <i>Arrdc1</i>        | chr2:24925351-24935252    | 39.2522  | 37.9823  | -0.0474 | 0.170451 |
| <i>Qrfp</i>          | chr2:31806165-31810580    | 3.9937   | 4.1929   | 0.0702  | 0.807928 |
| <i>Zfp687</i>        | chr3:95006589-95015448    | 11.0237  | 10.6151  | -0.0545 | 0.476325 |
| <i>Sec24d</i>        | chr3:123267495-123365635  | 4.1956   | 3.9743   | -0.0782 | 0.581651 |
| <i>Wls</i>           | chr3:159839736-159935833  | 15.0238  | 15.3631  | 0.0322  | 0.828884 |
| <i>Gm6899</i>        | chr11:26593240-26593862   | 1.7365   | 1.9364   | 0.1572  | 0.666355 |
| <i>Slc16a11</i>      | chr11:70212751-70216417   | 0.7792   | 0.8459   | 0.1185  | 0.688452 |
| <i>Psmd9</i>         | chr5:123228189-123250131  | 4.5629   | 4.6424   | 0.0249  | 0.771588 |
| <i>Zdhhc14</i>       | chr17:5492599-5753891     | 1.0863   | 0.9975   | -0.1231 | 0.561613 |
| <i>Btrc</i>          | chr19:45363733-45533341   | 3.1521   | 3.2176   | 0.0297  | 0.778835 |
| <i>Ctdp1</i>         | chr18:80407958-80469695   | 22.5997  | 21.6909  | -0.0592 | 0.576076 |
| <i>Dclre1b</i>       | chr3:103800604-103809444  | 5.7100   | 5.8001   | 0.0226  | 0.818187 |
| <i>Rnf167</i>        | chr11:70647234-70651421   | 101.1561 | 97.6922  | -0.0503 | 0.418539 |
| <i>Bcas3os1</i>      | chr11:85702199-85719744   | 0.8938   | 0.8072   | -0.1471 | 0.698350 |
| <i>Wdr45b</i>        | chr11:121327223-121354445 | 10.4684  | 10.0822  | -0.0542 | 0.301113 |
| <i>Mthfd1</i>        | chr12:76255231-76319820   | 25.0518  | 24.0842  | -0.0568 | 0.468837 |
| <i>Tmem165</i>       | chr5:76183879-76209245    | 28.5254  | 27.5059  | -0.0525 | 0.380478 |
| <i>Gtpbp1</i>        | chr15:79690894-79721478   | 57.1238  | 57.9138  | 0.0198  | 0.849020 |
| <i>Gm7707</i>        | chr14:32266592-32267748   | 2.2092   | 2.0074   | -0.1382 | 0.561958 |
| <i>Npc1</i>          | chr18:12189692-12236400   | 9.5631   | 9.7168   | 0.0230  | 0.849239 |
| <i>Mybpc3</i>        | chr2:91118143-91136516    | 0.7164   | 0.7713   | 0.1064  | 0.779327 |
| <i>Ebna1bp2</i>      | chr4:118620798-118627776  | 29.6467  | 29.9999  | 0.0171  | 0.824948 |
| <i>Ttc23</i>         | chr7:67647409-67726576    | 0.2607   | 0.2801   | 0.1040  | 0.647893 |
| <i>Rtn4ip1</i>       | chr10:43901806-43947862   | 4.6748   | 4.4470   | -0.0721 | 0.351527 |
| <i>AW549877</i>      | chr15:3982035-3995752     | 22.6882  | 22.9443  | 0.0162  | 0.863595 |
| <i>Pfkfb3</i>        | chr2:11471429-11502101    | 5.0069   | 5.0885   | 0.0233  | 0.793803 |
| <i>Ubb</i>           | chr11:62551170-62553213   | 78.5416  | 80.5211  | 0.0359  | 0.839323 |
| <i>Uqcc2</i>         | chr17:27122662-27133916   | 22.0811  | 20.6416  | -0.0973 | 0.688810 |
| <i>Asb8</i>          | chr15:98134636-98165625   | 10.4522  | 9.9710   | -0.0680 | 0.553346 |
| <i>Mcoln1</i>        | chr8:3500456-3515232      | 10.2213  | 10.3862  | 0.0231  | 0.785936 |
| <i>Wwc2</i>          | chr8:47826082-47990543    | 0.1535   | 0.1317   | -0.2216 | 0.619254 |
| <i>Fam111a</i>       | chr19:12545739-12589768   | 52.4452  | 53.3928  | 0.0258  | 0.834733 |
| <i>Scfd1</i>         | chr12:51377579-51450096   | 40.0992  | 38.2589  | -0.0678 | 0.605068 |
| <i>Ppan</i>          | chr9:20888174-20892178    | 32.9516  | 33.4221  | 0.0205  | 0.843347 |
| <i>AB124611</i>      | chr9:21526175-21545333    | 73.5834  | 70.4064  | -0.0637 | 0.569434 |
| <i>Hyal1</i>         | chr9:107576926-107581710  | 0.9633   | 1.0123   | 0.0716  | 0.686591 |
| <i>Tbcc</i>          | chr17:46890620-46892463   | 9.6674   | 9.1687   | -0.0764 | 0.560926 |
| <i>Lmbrd1</i>        | chr1:24678543-24766299    | 8.5516   | 8.6773   | 0.0210  | 0.796897 |
| <i>Hsd17b4</i>       | chr18:50128200-50196269   | 20.7602  | 21.0264  | 0.0184  | 0.812359 |
| <i>Ccdc62</i>        | chr5:123927417-123969895  | 1.7333   | 1.8181   | 0.0689  | 0.788282 |
| <i>Capn5</i>         | chr7:98121558-98178274    | 0.2190   | 0.2438   | 0.1552  | 0.768734 |
| <i>Serinc1</i>       | chr10:57515773-57532530   | 33.3626  | 33.5955  | 0.0100  | 0.863899 |
| <i>mmu-mir-3061</i>  | chr11:52124529-52127779   | 7.6222   | 7.2908   | -0.0641 | 0.413388 |
| <i>2810008D09Rik</i> | chr11:117076789-117078955 | 27.7096  | 26.4577  | -0.0667 | 0.585948 |
| <i>Smek1</i>         | chr12:101039408-101083702 | 62.9138  | 60.8845  | -0.0473 | 0.355149 |

|                      |                           |         |         |         |          |
|----------------------|---------------------------|---------|---------|---------|----------|
| <i>Hiatl1</i>        | chr13:65064662-65112982   | 19.9435 | 20.1884 | 0.0176  | 0.822151 |
| <i>C1galt1</i>       | chr6:7844841-7872047      | 33.2830 | 32.0181 | -0.0559 | 0.508399 |
| <i>Capza2</i>        | chr6:17636233-17666972    | 37.4833 | 37.9344 | 0.0173  | 0.842262 |
| <i>Ceacam16</i>      | chr7:19852096-19861299    | 0.7785  | 0.8655  | 0.1529  | 0.737692 |
| <i>Eid2b</i>         | chr7:28277705-28280129    | 1.8170  | 1.6752  | -0.1172 | 0.613727 |
| <i>Wdr83os</i>       | chr8:85080739-85082339    | 16.1741 | 16.4872 | 0.0277  | 0.710027 |
| <i>Qars</i>          | chr9:108508004-108515941  | 24.9058 | 25.1834 | 0.0160  | 0.841550 |
| <i>Atp7a</i>         | chrX:106027275-106124926  | 4.1982  | 4.0034  | -0.0686 | 0.608494 |
| <i>1110038F14Rik</i> | chr15:76948538-76950729   | 27.3392 | 27.9217 | 0.0304  | 0.794475 |
| <i>Tab1</i>          | chr15:80133153-80161701   | 13.8192 | 13.1891 | -0.0673 | 0.563123 |
| <i>Tbc1d22a</i>      | chr15:86214458-86498503   | 14.7546 | 14.2156 | -0.0537 | 0.410585 |
| <i>Letmd1</i>        | chr15:100469033-100479252 | 23.7136 | 22.8817 | -0.0515 | 0.327523 |
| <i>Zswim8</i>        | chr14:20707551-20723618   | 13.6059 | 13.0056 | -0.0651 | 0.613655 |
| <i>Ddx39b</i>        | chr17:35241745-35253707   | 85.5484 | 82.9184 | -0.0450 | 0.260084 |
| <i>Supt3</i>         | chr17:44777151-45119290   | 1.6163  | 1.5184  | -0.0901 | 0.355456 |
| <i>Dlg1</i>          | chr16:31663442-31873356   | 13.9303 | 14.0035 | 0.0076  | 0.793035 |
| <i>Pcx</i>           | chr19:4510471-4621752     | 0.8464  | 0.8901  | 0.0726  | 0.598683 |
| <i>Rpl13a-ps1</i>    | chr19:50030123-50030735   | 3.8287  | 4.1140  | 0.1037  | 0.724095 |
| <i>Tyw5</i>          | chr1:57388236-57407101    | 8.4578  | 8.0467  | -0.0719 | 0.542900 |
| <i>Rnmt</i>          | chr18:68300354-68324852   | 14.0490 | 13.4949 | -0.0581 | 0.534855 |
| <i>Gm13179</i>       | chr2:4586023-4587287      | 0.9002  | 0.7667  | -0.2316 | 0.642664 |
| <i>Gm13402</i>       | chr2:29349841-29396459    | 11.7685 | 12.3101 | 0.0649  | 0.678224 |
| <i>Ppp4r1-ps</i>     | chr2:173579319-173659640  | 1.5808  | 1.4919  | -0.0835 | 0.664447 |
| <i>Rrnad1</i>        | chr3:87922600-87930717    | 21.6442 | 20.9524 | -0.0469 | 0.302802 |
| <i>Lamtor2</i>       | chr3:88549818-88553074    | 13.4654 | 14.1255 | 0.0690  | 0.808686 |
| <i>Arhgef39</i>      | chr4:43496411-43499695    | 1.0678  | 1.1306  | 0.0824  | 0.684494 |
| <i>Rbm41</i>         | chrX:139889510-139998595  | 6.3993  | 6.4910  | 0.0205  | 0.789791 |
| <i>Med9</i>          | chr11:59948205-59962205   | 5.2693  | 4.9529  | -0.0893 | 0.624653 |
| <i>Arl16</i>         | chr11:120464865-120467607 | 5.5246  | 5.2540  | -0.0724 | 0.505165 |
| <i>Srp72</i>         | chr5:76974682-76999937    | 26.0205 | 25.1445 | -0.0494 | 0.358791 |
| <i>Prkrip1</i>       | chr5:136178126-136198963  | 5.8289  | 5.9377  | 0.0267  | 0.801763 |
| <i>Ino80b</i>        | chr6:83121764-83125431    | 16.0626 | 16.5263 | 0.0411  | 0.812206 |
| <i>Fam60a</i>        | chr6:148921034-148946467  | 1.8446  | 1.9032  | 0.0451  | 0.588774 |
| <i>Fah</i>           | chr7:84585158-84606722    | 1.2521  | 1.1507  | -0.1219 | 0.363953 |
| <i>Cyp4f41-ps</i>    | chr17:32950960-32965700   | 0.3432  | 0.3939  | 0.1987  | 0.638584 |
| <i>Crybg3</i>        | chr16:59490774-59555752   | 4.6859  | 4.7612  | 0.0230  | 0.767614 |
| <i>Pkn3</i>          | chr2:30077683-30091022    | 0.5495  | 0.4927  | -0.1576 | 0.673005 |
| <i>Gm16069</i>       | chr3:89180754-89182293    | 24.4389 | 25.0728 | 0.0369  | 0.766402 |
| <i>Coa7</i>          | chr4:108328139-108341544  | 4.9426  | 5.0263  | 0.0242  | 0.733922 |
| <i>Gm13032</i>       | chr4:140810992-140817511  | 0.3538  | 0.4077  | 0.2048  | 0.757924 |
| <i>Tnrc6c</i>        | chr11:117654288-117763439 | 21.5930 | 20.7405 | -0.0581 | 0.609084 |
| <i>Trappc4</i>       | chr9:44403760-44407548    | 30.5922 | 29.1266 | -0.0708 | 0.579490 |
| <i>Tnfrsf1b</i>      | chr4:145213462-145246870  | 18.3057 | 17.3883 | -0.0742 | 0.671696 |
| <i>Setd8</i>         | chr5:124439929-124462308  | 10.2697 | 10.4296 | 0.0223  | 0.809779 |
| <i>Aig1</i>          | chr10:13647053-13868980   | 1.3686  | 1.4262  | 0.0594  | 0.818709 |
| <i>Tnfaip3</i>       | chr10:19000909-19015657   | 14.5615 | 14.0192 | -0.0548 | 0.558598 |
| <i>Slc2a12</i>       | chr10:22645010-22704285   | 2.3428  | 2.4210  | 0.0474  | 0.790056 |
| <i>Rps12</i>         | chr10:23785210-23787195   | 23.2589 | 21.9492 | -0.0836 | 0.596259 |
| <i>Ptprk</i>         | chr10:28074819-28597397   | 0.5701  | 0.5277  | -0.1114 | 0.559539 |
| <i>Traf3ip2</i>      | chr10:39612933-39655307   | 18.1447 | 18.3995 | 0.0201  | 0.842707 |
| <i>Gm26824</i>       | chr10:39864858-39866332   | 2.2963  | 2.1127  | -0.1202 | 0.529084 |
| <i>Cdc40</i>         | chr10:40831625-40883143   | 12.5126 | 12.6124 | 0.0115  | 0.711233 |
| <i>Zfp365</i>        | chr10:67886102-67912662   | 2.2583  | 2.1249  | -0.0878 | 0.620386 |
| <i>Sumo3</i>         | chr10:77606096-77641543   | 19.3014 | 19.5711 | 0.0200  | 0.843450 |
| <i>Pdxk</i>          | chr10:78436743-78464975   | 2.9996  | 2.8520  | -0.0728 | 0.608576 |
| <i>Cdc34</i>         | chr10:79682194-79688394   | 31.8278 | 32.5409 | 0.0320  | 0.844689 |
| <i>Ndufs7</i>        | chr10:80249120-80256794   | 23.9481 | 22.8679 | -0.0666 | 0.597991 |
| <i>Gamt</i>          | chr10:80258150-80261012   | 0.6187  | 0.5361  | -0.2069 | 0.643924 |
| <i>Mrpl54</i>        | chr10:81264712-81266934   | 40.3269 | 41.3562 | 0.0364  | 0.829056 |
| <i>Ankrd24</i>       | chr10:81628539-81647610   | 0.7457  | 0.7019  | -0.0873 | 0.417365 |
| <i>Apaf1</i>         | chr10:90989310-91082770   | 8.1220  | 7.8036  | -0.0577 | 0.601665 |
| <i>Mdm1</i>          | chr10:118141786-118168997 | 3.8903  | 3.6614  | -0.0875 | 0.643222 |
| <i>Stat6</i>         | chr10:127642985-127660957 | 63.8093 | 64.3553 | 0.0123  | 0.870763 |
| <i>H2afv</i>         | chr11:6427228-6444443     | 24.5341 | 23.3716 | -0.0700 | 0.631769 |
| <i>Sertad2</i>       | chr11:20543252-20653021   | 7.4851  | 7.5909  | 0.0203  | 0.822416 |
| <i>Pex13</i>         | chr11:23646478-23665959   | 5.4361  | 5.5562  | 0.0315  | 0.785688 |
| <i>Rps27a</i>        | chr11:29545845-29548109   | 13.9694 | 14.1907 | 0.0227  | 0.823294 |
| <i>Gm12568</i>       | chr11:46243570-46244194   | 1.6838  | 1.4896  | -0.1768 | 0.619147 |
| <i>Gm24157</i>       | chr11:52099057-52099153   | 84.3902 | 80.0068 | -0.0770 | 0.306915 |
| <i>Gm22884</i>       | chr11:55482693-55482833   | 12.6957 | 13.6436 | 0.1039  | 0.704713 |
| <i>Snord49a</i>      | chr11:62603449-62603521   | 39.2873 | 35.4639 | -0.1477 | 0.657041 |



|                      |                           |          |          |         |          |
|----------------------|---------------------------|----------|----------|---------|----------|
| <i>Fbxw10</i>        | chr11:62847068-62877465   | 0.9424   | 0.8666   | -0.1209 | 0.671567 |
| <i>Elac2</i>         | chr11:64979037-65002069   | 17.4698  | 17.6287  | 0.0131  | 0.848462 |
| <i>Myh10</i>         | chr11:68691558-68816632   | 0.3517   | 0.3737   | 0.0875  | 0.808441 |
| <i>Dhx33</i>         | chr11:70984090-71004437   | 8.2860   | 8.3446   | 0.0102  | 0.833085 |
| <i>Gosr1</i>         | chr11:76726601-76763579   | 30.5393  | 29.4166  | -0.0540 | 0.520573 |
| <i>Fam222b</i>       | chr11:78094659-78156700   | 2.9786   | 3.0771   | 0.0469  | 0.768752 |
| <i>Nek8</i>          | chr11:78166105-78176675   | 2.9264   | 2.7926   | -0.0675 | 0.385201 |
| <i>Unc119</i>        | chr11:78343481-78349164   | 4.0280   | 4.1256   | 0.0345  | 0.582810 |
| <i>Z610027K06Rik</i> | chr11:85791660-85832223   | 0.6653   | 0.6002   | -0.1487 | 0.593581 |
| <i>Slc35b1</i>       | chr11:95384691-95391776   | 14.1612  | 13.5085  | -0.0681 | 0.570920 |
| <i>Pip4k2b</i>       | chr11:97715156-97744704   | 21.2669  | 21.4367  | 0.0115  | 0.867636 |
| <i>Cwc25</i>         | chr11:97745480-97766556   | 6.6402   | 6.7458   | 0.0228  | 0.824103 |
| <i>Gm12352</i>       | chr11:98438036-98439046   | 14.6264  | 15.2401  | 0.0593  | 0.820145 |
| <i>Slc9a3r1</i>      | chr11:115163340-115181181 | 73.5380  | 70.7421  | -0.0559 | 0.547514 |
| <i>Tha1</i>          | chr11:117867951-117873481 | 12.0162  | 11.4921  | -0.0643 | 0.578708 |
| <i>Sgsh</i>          | chr11:119343424-119355536 | 18.2707  | 17.5391  | -0.0590 | 0.600842 |
| <i>Rdh14</i>         | chr12:10390779-10395562   | 19.2896  | 18.4982  | -0.0604 | 0.491144 |
| <i>Zfp277</i>        | chr12:40315045-40445790   | 14.2983  | 13.6946  | -0.0622 | 0.567029 |
| <i>Ralgapa1</i>      | chr12:55602928-55821167   | 20.0077  | 20.2503  | 0.0174  | 0.871417 |
| <i>Prpf39</i>        | chr12:65036332-65063386   | 48.9871  | 47.3580  | -0.0488 | 0.450279 |
| <i>Rps29</i>         | chr12:69157721-69159186   | 5.8486   | 6.1703   | 0.0772  | 0.741128 |
| <i>Frmf6</i>         | chr12:70825513-70902232   | 3.5456   | 3.3842   | -0.0672 | 0.557760 |
| <i>Srsf5</i>         | chr12:80945503-80950507   | 170.8140 | 165.7669 | -0.0433 | 0.274540 |
| <i>9330161L09Rik</i> | chr12:103406821-103407820 | 3.0979   | 2.8417   | -0.1246 | 0.523453 |
| <i>Degs2</i>         | chr12:108686791-108702306 | 48.7948  | 47.2244  | -0.0472 | 0.415396 |
| <i>Bag5</i>          | chr12:111709487-111713257 | 13.5331  | 13.7736  | 0.0254  | 0.810766 |
| <i>Gdi2</i>          | chr13:3538074-3566261     | 115.4535 | 116.7120 | 0.0156  | 0.858033 |
| <i>Ggps1</i>         | chr13:14052448-14063401   | 36.9135  | 35.4717  | -0.0575 | 0.547677 |
| <i>Elmo1</i>         | chr13:20090506-20608353   | 18.9808  | 19.2691  | 0.0218  | 0.875049 |
| <i>Pgbd1</i>         | chr13:21421274-21441058   | 0.5616   | 0.5086   | -0.1430 | 0.673225 |
| <i>Nqa2</i>          | chr13:33964658-33988465   | 3.7123   | 3.8247   | 0.0430  | 0.804481 |
| <i>Rnf44</i>         | chr13:54679398-54693907   | 10.2024  | 10.4318  | 0.0321  | 0.856713 |
| <i>Ddx46</i>         | chr13:55635026-55681256   | 42.2351  | 42.4838  | 0.0085  | 0.878751 |
| <i>Golm1</i>         | chr13:59634995-59675784   | 47.8729  | 48.4017  | 0.0158  | 0.885482 |
| <i>Zfp738</i>        | chr13:67667436-67687071   | 7.1533   | 6.8471   | -0.0631 | 0.588339 |
| <i>Z210408I21Rik</i> | chr13:77135539-77613291   | 0.3377   | 0.3676   | 0.1226  | 0.742715 |
| <i>Ptcd2</i>         | chr13:99319648-99344678   | 27.2692  | 26.1123  | -0.0625 | 0.560861 |
| <i>Dhx29</i>         | chr13:112927729-112969431 | 13.5725  | 13.7878  | 0.0227  | 0.834600 |
| <i>Lrrd1</i>         | chr5:3845172-3866596      | 0.3770   | 0.4122   | 0.1289  | 0.700466 |
| <i>Insig1</i>        | chr5:28071362-28078662    | 16.0125  | 15.2200  | -0.0732 | 0.657221 |
| <i>Haus3</i>         | chr5:34153920-34169445    | 28.6322  | 29.1890  | 0.0278  | 0.818294 |
| <i>Mrpl1</i>         | chr5:96209492-96266727    | 7.3849   | 7.0438   | -0.0682 | 0.601778 |
| <i>Ddx51</i>         | chr5:110653450-110660496  | 5.5954   | 5.3468   | -0.0656 | 0.548836 |
| <i>Rpl37rt</i>       | chr5:115102921-115110268  | 7.3147   | 6.8601   | -0.0926 | 0.530558 |
| <i>Rplp0</i>         | chr5:115559466-115563727  | 676.2746 | 638.4907 | -0.0829 | 0.722250 |
| <i>Fbxw8</i>         | chr5:118064980-118155458  | 3.7269   | 3.5017   | -0.0899 | 0.690500 |
| <i>Fam109a</i>       | chr5:121849027-121854599  | 2.1621   | 2.2473   | 0.0558  | 0.667044 |
| <i>Clip1</i>         | chr5:123577794-123684618  | 21.4241  | 20.7354  | -0.0471 | 0.425259 |
| <i>Alkbh4</i>        | chr5:136136145-136141615  | 27.4417  | 27.7432  | 0.0158  | 0.822811 |
| <i>NA</i>            | chr5:143548705-143564525  | 6.8508   | 6.5272   | -0.0698 | 0.558396 |
| <i>Ankrd61</i>       | chr5:143890740-143897685  | 3.6961   | 3.8185   | 0.0470  | 0.768097 |
| <i>Rnf6</i>          | chr5:146209191-146221555  | 26.9393  | 26.0413  | -0.0489 | 0.347741 |
| <i>Gm16039</i>       | chr6:8259287-8597480      | 4.4822   | 4.2826   | -0.0657 | 0.653157 |
| <i>A430035B10Rik</i> | chr6:8488794-8510430      | 1.2461   | 1.1685   | -0.0927 | 0.573449 |
| <i>Lsm8</i>          | chr6:18848578-18855751    | 14.0348  | 13.4651  | -0.0598 | 0.566663 |
| <i>Hilpda</i>        | chr6:29272487-29275446    | 8.6249   | 8.8678   | 0.0401  | 0.787808 |
| <i>Copg2</i>         | chr6:30747553-30896794    | 10.7124  | 10.2416  | -0.0648 | 0.577898 |
| <i>Fth-ps2</i>       | chr6:39653449-39653965    | 2.0292   | 2.2433   | 0.1447  | 0.707348 |
| <i>Trbv19</i>        | chr6:41178588-41179048    | 56.6012  | 53.8987  | -0.0706 | 0.631134 |
| <i>Trbv21</i>        | chr6:41202754-41203044    | 3.8698   | 4.2353   | 0.1302  | 0.649268 |
| <i>Znrf2</i>         | chr6:54816915-54893500    | 85.1226  | 85.5538  | 0.0073  | 0.859120 |
| <i>Ptcd3</i>         | chr6:71880647-71908762    | 36.6426  | 37.1165  | 0.0185  | 0.861761 |
| <i>Sec61a1</i>       | chr6:88503600-88518905    | 32.4343  | 31.3898  | -0.0472 | 0.411666 |
| <i>Brk1</i>          | chr6:113604771-113616948  | 86.3378  | 82.4257  | -0.0669 | 0.635635 |
| <i>Rasgef1a</i>      | chr6:118066384-118091546  | 0.7165   | 0.7611   | 0.0871  | 0.717568 |
| <i>Gm26951</i>       | chr6:128313336-128313997  | 1.1632   | 1.3220   | 0.1846  | 0.687481 |
| <i>Rpl18-ps2</i>     | chr6:128313337-128313960  | 1.1352   | 1.2901   | 0.1846  | 0.687481 |
| <i>Atf7ip</i>        | chr6:136518850-136607377  | 36.2455  | 34.8105  | -0.0583 | 0.610354 |
| <i>Ldhd</i>          | chr6:142490248-142507957  | 2.6367   | 2.4284   | -0.1187 | 0.660959 |
| <i>Mettl20</i>       | chr6:149139848-149151171  | 15.9631  | 16.2441  | 0.0252  | 0.841087 |
| <i>Shkbp1</i>        | chr7:27342132-27356019    | 7.5331   | 7.6715   | 0.0263  | 0.832472 |

|                      |                          |         |         |         |          |
|----------------------|--------------------------|---------|---------|---------|----------|
| <i>Pak4</i>          | chr7:28558818-28598185   | 2.3798  | 2.2257  | -0.0966 | 0.693492 |
| <i>Mrps12</i>        | chr7:28739640-28741820   | 18.8143 | 17.8037 | -0.0797 | 0.648324 |
| <i>Zfp420</i>        | chr7:29859978-29877292   | 3.9515  | 4.0223  | 0.0256  | 0.796673 |
| <i>Gm21982</i>       | chr7:30641000-30664937   | 22.1713 | 21.1892 | -0.0654 | 0.612105 |
| <i>Gm26935</i>       | chr7:30737652-30748437   | 2.8337  | 2.5365  | -0.1598 | 0.603888 |
| <i>Usf2</i>          | chr7:30945251-30956803   | 21.5476 | 21.8521 | 0.0202  | 0.834876 |
| <i>Gm6096</i>        | chr7:34251037-34251493   | 1.8724  | 2.0965  | 0.1631  | 0.654028 |
| <i>Lsm14a</i>        | chr7:34344645-34389540   | 31.7026 | 31.9260 | 0.0101  | 0.844944 |
| <i>Ankrd27</i>       | chr7:35586246-35639237   | 13.8726 | 13.3698 | -0.0533 | 0.467930 |
| <i>Scaf1</i>         | chr7:45002947-45016363   | 6.0157  | 6.1317  | 0.0275  | 0.857133 |
| <i>Gm22478</i>       | chr7:45388530-45388684   | 10.4308 | 9.4045  | -0.1494 | 0.506412 |
| <i>Tsg101</i>        | chr7:46888948-46919969   | 8.6230  | 8.2404  | -0.0655 | 0.522878 |
| <i>Fancf</i>         | chr7:51860576-51862267   | 6.5470  | 6.2183  | -0.0743 | 0.569287 |
| <i>Gdpgp1</i>        | chr7:80232866-80241006   | 7.3419  | 7.4471  | 0.0205  | 0.804236 |
| <i>Hddc3</i>         | chr7:80343136-80346097   | 3.3210  | 3.0382  | -0.1284 | 0.533284 |
| <i>Zfand6</i>        | chr7:84615053-84679361   | 65.2288 | 62.5744 | -0.0599 | 0.575316 |
| <i>Tmem135</i>       | chr7:89139722-89404222   | 7.4198  | 7.4859  | 0.0128  | 0.819771 |
| <i>Gm15506</i>       | chr7:98682335-98702928   | 0.9861  | 0.8562  | -0.2037 | 0.597903 |
| <i>Gdpd5</i>         | chr7:99381548-99460983   | 1.5121  | 1.4189  | -0.0918 | 0.538159 |
| <i>Fam168a</i>       | chr7:100706650-100841628 | 4.2402  | 4.3233  | 0.0280  | 0.840883 |
| <i>Ampd3</i>         | chr7:110768205-110812405 | 1.5710  | 1.6140  | 0.0390  | 0.759240 |
| <i>Acsn3</i>         | chr7:119760922-119787513 | 1.5796  | 1.6305  | 0.0458  | 0.673136 |
| <i>Gdpd3</i>         | chr7:126766413-126775643 | 1.8839  | 1.6999  | -0.1482 | 0.529899 |
| <i>Sez6l2</i>        | chr7:126950562-126970606 | 0.6106  | 0.6511  | 0.0925  | 0.682584 |
| <i>Zfp689</i>        | chr7:127443751-127449158 | 7.4783  | 7.6797  | 0.0384  | 0.807170 |
| <i>Eri1</i>          | chr8:35465264-35495533   | 25.0956 | 24.2648 | -0.0486 | 0.426704 |
| <i>Lzts1</i>         | chr8:69135502-69140953   | 0.7932  | 0.6979  | -0.1846 | 0.674776 |
| <i>Ccnb2-ps</i>      | chr8:71916555-71918851   | 3.8465  | 3.6347  | -0.0817 | 0.458664 |
| <i>Abce1</i>         | chr8:79683441-79711740   | 84.1409 | 85.4910 | 0.0230  | 0.857120 |
| <i>Smarca5</i>       | chr8:80698506-80739497   | 15.8319 | 15.2806 | -0.0511 | 0.432213 |
| <i>Rln3</i>          | chr8:84042928-84045000   | 2.3053  | 2.4850  | 0.1083  | 0.719219 |
| <i>D8Erd738e</i>     | chr8:84246236-84249761   | 93.7832 | 89.3717 | -0.0695 | 0.634759 |
| <i>Mast1</i>         | chr8:84911902-84937359   | 0.3983  | 0.4268  | 0.0995  | 0.732464 |
| <i>Phlpp2</i>        | chr8:109868541-109944671 | 1.1310  | 1.1751  | 0.0552  | 0.831688 |
| <i>Tcf25</i>         | chr8:123373823-123404173 | 95.3849 | 95.7533 | 0.0056  | 0.917006 |
| <i>Ccsap</i>         | chr8:123840830-123860209 | 5.5194  | 5.6351  | 0.0299  | 0.797306 |
| <i>Arv1</i>          | chr8:124722138-124734123 | 13.2076 | 12.5810 | -0.0701 | 0.455476 |
| <i>Dync2h1</i>       | chr9:6928502-7184446     | 2.8924  | 2.7640  | -0.0655 | 0.668288 |
| <i>Gm24299</i>       | chr9:15314073-15314144   | 26.8897 | 23.8140 | -0.1752 | 0.638341 |
| <i>Cdc37</i>         | chr9:21138540-21149906   | 60.4435 | 61.6522 | 0.0286  | 0.859489 |
| <i>Gm16754</i>       | chr9:21225370-21232639   | 14.3007 | 14.5459 | 0.0245  | 0.815279 |
| <i>Kri1</i>          | chr9:21273457-21287971   | 58.5740 | 56.4320 | -0.0537 | 0.548127 |
| <i>Cnn1</i>          | chr9:22099280-22109630   | 0.3335  | 0.2879  | -0.2119 | 0.589698 |
| <i>Pigyl</i>         | chr9:22156845-22158358   | 5.9250  | 5.4435  | -0.1223 | 0.688730 |
| <i>Herpud2</i>       | chr9:25108129-25151781   | 15.7130 | 15.9595 | 0.0224  | 0.837489 |
| <i>Prdm10</i>        | chr9:31280537-31378543   | 3.8251  | 3.6580  | -0.0644 | 0.527815 |
| <i>Amica1</i>        | chr9:45079182-45108530   | 36.4916 | 36.9046 | 0.0162  | 0.861740 |
| <i>NA</i>            | chr9:45954100-45955998   | 9.0452  | 9.2898  | 0.0385  | 0.829517 |
| <i>Pjif1</i>         | chr9:65587159-65595967   | 0.5016  | 0.5593  | 0.1570  | 0.808984 |
| <i>Bnip2</i>         | chr9:69989465-70008317   | 34.3754 | 33.1361 | -0.0530 | 0.464341 |
| <i>Slc25a36</i>      | chr9:97075596-97111157   | 18.8147 | 19.0375 | 0.0170  | 0.856711 |
| <i>Uba5</i>          | chr9:104046598-104063134 | 17.3815 | 16.6773 | -0.0597 | 0.527861 |
| <i>Atp2c1</i>        | chr9:105403538-105521257 | 15.6435 | 15.7532 | 0.0101  | 0.846890 |
| <i>Gm17041</i>       | chr9:107300379-107301838 | 3.7025  | 3.3595  | -0.1403 | 0.588494 |
| <i>5830454E08Rik</i> | chr9:120577345-120578072 | 5.3850  | 5.0126  | -0.1034 | 0.377905 |
| <i>Sacm1l</i>        | chr9:123529881-123592598 | 31.2182 | 30.1206 | -0.0516 | 0.494283 |
| <i>Wdr45</i>         | chrX:7721972-7728201     | 12.7993 | 12.9633 | 0.0184  | 0.845226 |
| <i>Hdac6</i>         | chrX:7930119-7947889     | 2.6181  | 2.6731  | 0.0300  | 0.800302 |
| <i>Gm14493</i>       | chrX:10717472-10718710   | 8.4610  | 8.7792  | 0.0533  | 0.574714 |
| <i>Rpl3-ps1</i>      | chrX:13202545-13203838   | 0.8869  | 0.7797  | -0.1858 | 0.601265 |
| <i>Uba1</i>          | chrX:20658325-20683179   | 81.2734 | 81.5474 | 0.0049  | 0.891189 |
| <i>Akap17b</i>       | chrX:36608313-36645395   | 2.3360  | 2.2187  | -0.0743 | 0.594649 |
| <i>Ddx26b</i>        | chrX:56454856-56507843   | 11.4584 | 11.0261 | -0.0555 | 0.549569 |
| <i>Pdzd4</i>         | chrX:73793358-73824969   | 1.1547  | 1.0708  | -0.1089 | 0.675447 |
| <i>Hcfc1</i>         | chrX:73942791-73966357   | 17.5474 | 17.8848 | 0.0275  | 0.860804 |
| <i>Gm24718</i>       | chrX:96150836-96150972   | 15.1641 | 16.6659 | 0.1362  | 0.805069 |
| <i>Gm6472</i>        | chrX:152909503-152910155 | 41.6959 | 39.1590 | -0.0906 | 0.714360 |
| <i>Eif1ax</i>        | chrX:159372177-159389928 | 16.9850 | 16.2492 | -0.0639 | 0.617522 |
| <i>Ly6d</i>          | chr15:74762055-74763567  | 1.0615  | 1.1919  | 0.1671  | 0.617236 |
| <i>Dgat1</i>         | chr15:76502014-76511951  | 7.7085  | 7.3368  | -0.0713 | 0.654370 |
| <i>Kdelr3</i>        | chr15:79516407-79527739  | 2.1377  | 1.9503  | -0.1324 | 0.698287 |

|                      |                           |          |          |         |          |
|----------------------|---------------------------|----------|----------|---------|----------|
| <i>Rrp7a</i>         | chr15:83113432-83122801   | 11.7479  | 11.8718  | 0.0151  | 0.859165 |
| <i>Ncaph2</i>        | chr15:89355718-89372826   | 34.5402  | 33.4005  | -0.0484 | 0.401122 |
| <i>Ano6</i>          | chr15:95790842-95975464   | 19.1289  | 19.3001  | 0.0129  | 0.877378 |
| <i>Gm25397</i>       | chr15:96404857-96404949   | 17.6517  | 19.0520  | 0.1101  | 0.688690 |
| <i>Slc4a8</i>        | chr15:100761746-100823968 | 0.5055   | 0.4736   | -0.0941 | 0.594693 |
| <i>Acvrl1</i>        | chr15:101128521-101145336 | 2.9892   | 3.0777   | 0.0421  | 0.824429 |
| <i>Tarbp2</i>        | chr15:102518191-102523676 | 4.9003   | 4.9812   | 0.0236  | 0.729133 |
| <i>Fam149b</i>       | chr14:20348161-20383489   | 24.9858  | 25.2375  | 0.0145  | 0.873214 |
| <i>Dnajc9</i>        | chr14:20384637-20388910   | 76.1644  | 77.0731  | 0.0171  | 0.843765 |
| <i>Ppp3cb</i>        | chr14:20499363-20546573   | 21.5327  | 20.8369  | -0.0474 | 0.403329 |
| <i>Nek4</i>          | chr14:30951485-30987439   | 1.2492   | 1.3124   | 0.0712  | 0.778487 |
| <i>Ercc6</i>         | chr14:32513520-32580989   | 16.0603  | 15.5422  | -0.0473 | 0.444096 |
| <i>Gm17173</i>       | chr14:44972267-45006900   | 1.4366   | 1.3079   | -0.1354 | 0.692299 |
| <i>Tmem253</i>       | chr14:52016864-52019787   | 1.9123   | 1.7399   | -0.1363 | 0.643962 |
| <i>Trav19</i>        | chr14:53845233-53845826   | 7.3742   | 6.7904   | -0.1190 | 0.572176 |
| <i>Ppp1r3e</i>       | chr14:54872668-54877550   | 1.1779   | 1.2461   | 0.0811  | 0.712828 |
| <i>Tssk4</i>         | chr14:55650181-55652539   | 2.0597   | 1.9112   | -0.1079 | 0.497778 |
| <i>Ggact</i>         | chr14:122816222-122913757 | 24.6928  | 25.0423  | 0.0203  | 0.826845 |
| <i>Mpc1</i>          | chr17:8282903-8297661     | 3.8878   | 3.6862   | -0.0768 | 0.303626 |
| <i>Chd1</i>          | chr17:15704966-15772610   | 35.3170  | 35.6066  | 0.0118  | 0.862810 |
| <i>Zfp97</i>         | chr17:17121414-17146831   | 2.8513   | 2.6756   | -0.0917 | 0.622708 |
| <i>Pkmyt1</i>        | chr17:23726335-23736729   | 10.0437  | 10.3359  | 0.0414  | 0.834589 |
| <i>Ube2i</i>         | chr17:25261915-25274622   | 30.2074  | 30.3442  | 0.0065  | 0.903377 |
| <i>Tmem8</i>         | chr17:26113315-26123254   | 5.0754   | 5.2015   | 0.0354  | 0.814955 |
| <i>Kifc5b</i>        | chr17:26917090-26932579   | 0.8139   | 0.8703   | 0.0967  | 0.745670 |
| <i>Def6</i>          | chr17:28207777-28228608   | 73.5222  | 74.5423  | 0.0199  | 0.856676 |
| <i>Gm23887</i>       | chr17:28989976-28990148   | 9.5684   | 8.5199   | -0.1675 | 0.554876 |
| <i>Hnrnpm</i>        | chr17:33646232-33686860   | 58.1464  | 59.1206  | 0.0240  | 0.844909 |
| <i>H2-DMa</i>        | chr17:34135181-34139101   | 26.6373  | 27.2705  | 0.0339  | 0.826734 |
| <i>H2-Q6</i>         | chr17:35424849-35430055   | 140.1811 | 134.4061 | -0.0607 | 0.636057 |
| <i>Mut</i>           | chr17:40934684-40961989   | 17.1589  | 17.3002  | 0.0118  | 0.833237 |
| <i>Gm26785</i>       | chr17:46273478-46280060   | 0.7308   | 0.7910   | 0.1141  | 0.739643 |
| <i>Mrpl2</i>         | chr17:46646228-46650139   | 22.7924  | 23.4114  | 0.0387  | 0.829235 |
| <i>Pp2d1</i>         | chr17:53507459-53539451   | 0.6871   | 0.7567   | 0.1392  | 0.729926 |
| <i>Dpy30</i>         | chr17:74299473-74323944   | 24.5758  | 25.1985  | 0.0361  | 0.812449 |
| <i>Txndc11</i>       | chr16:11074910-11134650   | 7.1569   | 6.8716   | -0.0587 | 0.583711 |
| <i>Marf1</i>         | chr16:14109165-14159274   | 27.6313  | 26.6795  | -0.0506 | 0.501604 |
| <i>Arvcf</i>         | chr16:18348181-18407076   | 0.5043   | 0.4584   | -0.1375 | 0.699849 |
| <i>1110054M08Rik</i> | chr16:24391611-24393588   | 4.1447   | 3.9022   | -0.0870 | 0.206278 |
| <i>Gm15743</i>       | chr16:31427875-31429776   | 3.0817   | 3.2004   | 0.0545  | 0.790073 |
| <i>Rpl35a</i>        | chr16:33056452-33060189   | 88.7999  | 94.1610  | 0.0846  | 0.736079 |
| <i>Abi3bp</i>        | chr16:56477845-56690128   | 0.4636   | 0.4987   | 0.1052  | 0.774805 |
| <i>Itsn1</i>         | chr16:91729280-91920597   | 0.1801   | 0.1673   | -0.1071 | 0.589528 |
| <i>1700048M11Rik</i> | chr16:92308715-92312466   | 2.3246   | 2.5305   | 0.1224  | 0.654548 |
| <i>Hlcs</i>          | chr16:94129194-94313563   | 7.5816   | 7.7296   | 0.0279  | 0.854394 |
| <i>Syvn1</i>         | chr19:6046575-6053712     | 6.0607   | 5.8305   | -0.0559 | 0.360423 |
| <i>Nxf1</i>          | chr19:8757102-8770909     | 98.4525  | 95.4397  | -0.0448 | 0.252342 |
| <i>Ptar1</i>         | chr19:23687399-23721129   | 14.1507  | 13.5657  | -0.0609 | 0.476080 |
| <i>Ermp1</i>         | chr19:29608213-29648415   | 9.1998   | 8.8636   | -0.0537 | 0.525115 |
| <i>Frat2</i>         | chr19:41845977-41848132   | 10.1980  | 9.5703   | -0.0917 | 0.698590 |
| <i>Pyroxd2</i>       | chr19:42725857-42752775   | 0.4364   | 0.3867   | -0.1745 | 0.669202 |
| <i>Trim8</i>         | chr19:46501647-46516444   | 19.7343  | 18.9021  | -0.0622 | 0.616917 |
| <i>Imp4</i>          | chr1:34439850-34445736    | 25.8096  | 26.2583  | 0.0249  | 0.851796 |
| <i>Ikzf2</i>         | chr1:69531213-69685960    | 8.6526   | 8.1858   | -0.0800 | 0.720382 |
| <i>Zfp142</i>        | chr1:74565126-74588246    | 4.1179   | 3.9619   | -0.0557 | 0.559674 |
| <i>Kcnj13</i>        | chr1:87386362-87394729    | 3.1965   | 2.9492   | -0.1162 | 0.667120 |
| <i>Mroh2a</i>        | chr1:88226985-88262289    | 1.1846   | 1.1145   | -0.0880 | 0.627881 |
| <i>9230116N13Rik</i> | chr1:136411915-136415519  | 2.1179   | 1.9603   | -0.1115 | 0.600859 |
| <i>Dennd1b</i>       | chr1:138963435-139176043  | 15.9106  | 15.3139  | -0.0551 | 0.581616 |
| <i>Stx6</i>          | chr1:155158702-155203517  | 29.5583  | 28.4609  | -0.0546 | 0.498372 |
| <i>Cenpl</i>         | chr1:161070766-161086724  | 1.3270   | 1.3756   | 0.0518  | 0.647044 |
| <i>Mettl18</i>       | chr1:163994888-163997243  | 10.9477  | 11.1813  | 0.0305  | 0.797983 |
| <i>Rcsd1</i>         | chr1:165648944-165708094  | 78.6908  | 76.1817  | -0.0467 | 0.473009 |
| <i>Gm15853</i>       | chr1:166379838-166380493  | 3.4836   | 3.1461   | -0.1470 | 0.590631 |
| <i>Cd244</i>         | chr1:171559192-171585318  | 0.2611   | 0.2920   | 0.1614  | 0.769659 |
| <i>Ncstn</i>         | chr1:172066012-172082795  | 14.8561  | 15.1210  | 0.0255  | 0.865077 |
| <i>Pex19</i>         | chr1:172126754-172136493  | 11.6638  | 11.7550  | 0.0112  | 0.763458 |
| <i>Gm16586</i>       | chr1:178321107-178324171  | 103.4650 | 99.5974  | -0.0550 | 0.575320 |
| <i>Ccny</i>          | chr18:9314043-9450150     | 39.1481  | 39.6466  | 0.0183  | 0.830214 |
| <i>Usp14</i>         | chr18:9995431-10045119    | 9.6351   | 9.7080   | 0.0109  | 0.821445 |
| <i>Kctd1</i>         | chr18:14968684-15151446   | 2.6995   | 2.7761   | 0.0404  | 0.786622 |

|               |                          |          |          |         |          |
|---------------|--------------------------|----------|----------|---------|----------|
| Ino80c        | chr18:24104756-24121953  | 15.7212  | 15.1030  | -0.0579 | 0.422484 |
| Sil1          | chr18:35266399-35498925  | 14.4716  | 14.8236  | 0.0347  | 0.835691 |
| Slc35a4       | chr18:36679578-36683858  | 12.3921  | 12.6052  | 0.0246  | 0.810647 |
| Isoc1         | chr18:58659481-58679570  | 23.2822  | 23.5422  | 0.0160  | 0.833705 |
| Gm9949        | chr18:62180125-62184405  | 1.5512   | 1.6892   | 0.1230  | 0.729106 |
| B430212C06Rik | chr18:67321208-67344103  | 0.4836   | 0.4356   | -0.1511 | 0.640019 |
| Fam210a       | chr18:68260186-68300333  | 9.5406   | 9.1794   | -0.0557 | 0.572902 |
| Mbd1          | chr18:74268271-74282685  | 25.9780  | 25.0292  | -0.0537 | 0.510046 |
| Ier3jp1       | chr18:76930016-76941605  | 19.6286  | 20.0873  | 0.0333  | 0.810330 |
| Pias2         | chr18:77065207-77155708  | 13.0455  | 13.1731  | 0.0140  | 0.799906 |
| Gm13357       | chr2:23019130-23019667   | 2.6891   | 2.3730   | -0.1804 | 0.739363 |
| Tubb4b        | chr2:25222159-25224702   | 42.3383  | 42.9229  | 0.0198  | 0.843066 |
| Ssna1         | chr2:25271038-25272438   | 26.9525  | 27.5040  | 0.0292  | 0.821772 |
| Gm23865       | chr2:29931426-29931523   | 27.9293  | 25.7441  | -0.1175 | 0.566739 |
| Zer1          | chr2:30097282-30124585   | 8.7738   | 8.4086   | -0.0613 | 0.606613 |
| Golga1        | chr2:39016260-39065541   | 15.7656  | 15.2352  | -0.0494 | 0.390259 |
| Mbd5          | chr2:48949509-49322284   | 2.6076   | 2.6622   | 0.0299  | 0.843413 |
| Rbm43         | chr2:51924447-51935163   | 21.0010  | 21.2618  | 0.0178  | 0.821998 |
| Baz2b         | chr2:59899362-60209839   | 6.2731   | 6.0539   | -0.0513 | 0.531616 |
| Timm10        | chr2:84826996-84830213   | 18.3743  | 19.0110  | 0.0491  | 0.814639 |
| Acp2          | chr2:91202884-91214098   | 10.9153  | 10.5307  | -0.0517 | 0.332514 |
| Nop10         | chr2:112261925-112263269 | 74.0327  | 76.1657  | 0.0410  | 0.835675 |
| Eif2ak4       | chr2:118388617-118475234 | 4.1610   | 4.0076   | -0.0542 | 0.288122 |
| Srp14         | chr2:118475849-118479711 | 60.5059  | 61.7795  | 0.0301  | 0.850802 |
| Tmem87a       | chr2:120355311-120404113 | 23.4911  | 22.6899  | -0.0501 | 0.429396 |
| Zscan29       | chr2:121158272-121171125 | 13.6387  | 13.1889  | -0.0484 | 0.352840 |
| Gm14009       | chr2:128189986-128204634 | 1.5374   | 1.3479   | -0.1898 | 0.635285 |
| Prnp          | chr2:131909927-131938429 | 0.3483   | 0.2939   | -0.2451 | 0.651623 |
| Tasp1         | chr2:139833479-140066805 | 11.8433  | 11.3096  | -0.0665 | 0.630449 |
| Gm11743       | chr2:144756328-144758582 | 0.6912   | 0.6115   | -0.1767 | 0.595652 |
| Cst3          | chr2:148871721-148875692 | 24.7482  | 25.2093  | 0.0266  | 0.817627 |
| Zfp120        | chr2:150114405-150136708 | 14.7382  | 14.0445  | -0.0696 | 0.634848 |
| Phf20         | chr2:156196465-156309952 | 7.0731   | 6.8155   | -0.0535 | 0.469341 |
| Neurl2        | chr2:164830731-164833456 | 3.5726   | 3.2867   | -0.1203 | 0.572732 |
| Trp53rk       | chr2:166792530-166799505 | 1.7992   | 1.8522   | 0.0418  | 0.731428 |
| Rps21         | chr2:180257376-180258445 | 189.0383 | 173.3116 | -0.1253 | 0.637880 |
| Nceh1         | chr3:27182964-27284608   | 8.4471   | 8.5374   | 0.0153  | 0.841800 |
| Fndc3b        | chr3:27416161-27710439   | 0.9069   | 0.9379   | 0.0485  | 0.790554 |
| Mccc1os       | chr3:35999832-36025106   | 0.3676   | 0.3941   | 0.1003  | 0.719967 |
| Med12l        | chr3:59006977-59318410   | 0.4714   | 0.4901   | 0.0562  | 0.685470 |
| Ccn1          | chr3:65946150-65958249   | 66.0031  | 66.6228  | 0.0135  | 0.862813 |
| A730011C13Rik | chr3:94994409-94997350   | 8.5673   | 8.7195   | 0.0254  | 0.807157 |
| Cers2         | chr3:95314791-95323588   | 38.8950  | 39.0807  | 0.0069  | 0.899563 |
| Tars2         | chr3:95739975-95754977   | 16.5880  | 16.6853  | 0.0084  | 0.873516 |
| C920021L13Rik | chr3:95871521-95889093   | 0.4158   | 0.3663   | -0.1830 | 0.565899 |
| Hiat1         | chr3:116631163-116681260 | 25.2509  | 24.3222  | -0.0541 | 0.493026 |
| Plag1         | chr4:3900995-3938423     | 0.6523   | 0.6873   | 0.0754  | 0.802757 |
| Ubxn2b        | chr4:6191097-6221688     | 6.7759   | 6.8625   | 0.0183  | 0.795280 |
| Gm10604       | chr4:11979559-11981265   | 0.7156   | 0.7870   | 0.1372  | 0.771907 |
| Gm11906       | chr4:24966516-25271099   | 4.8973   | 4.5146   | -0.1174 | 0.491210 |
| Nfx1          | chr4:40970905-41025993   | 25.6064  | 25.7081  | 0.0057  | 0.898907 |
| Galt          | chr4:41755227-41758695   | 12.1617  | 12.3548  | 0.0227  | 0.832496 |
| Msmg          | chr4:43583215-43584494   | 12.7788  | 12.0079  | -0.0898 | 0.630120 |
| Prpf4         | chr4:62408796-62426990   | 11.9008  | 11.4669  | -0.0536 | 0.408096 |
| Tnfsf8        | chr4:63831307-63861347   | 35.3442  | 35.6825  | 0.0137  | 0.858218 |
| Alg6          | chr4:99715663-99763460   | 1.1378   | 1.1748   | 0.0463  | 0.821889 |
| Gm12786       | chr4:107017934-107022499 | 1.5300   | 1.3469   | -0.1839 | 0.634643 |
| Gm12802       | chr4:107126612-107136252 | 2.3014   | 2.4323   | 0.0798  | 0.730468 |
| Magoh         | chr4:107879754-107887424 | 67.8361  | 70.1430  | 0.0482  | 0.844414 |
| Zyg11b        | chr4:108229723-108301096 | 29.2839  | 28.2593  | -0.0514 | 0.508813 |
| Ccdc163       | chr4:116708508-116751206 | 4.1803   | 3.9479   | -0.0825 | 0.622929 |
| Eif2b3        | chr4:117019401-117087306 | 3.9476   | 3.8000   | -0.0550 | 0.105146 |
| Gm12898       | chr4:119223173-119224815 | 5.4391   | 5.0483   | -0.1076 | 0.367927 |
| Ppcs          | chr4:119418529-119422420 | 8.5731   | 8.7506   | 0.0296  | 0.745279 |
| Adprhl2       | chr4:126316046-126321703 | 15.6480  | 15.0343  | -0.0577 | 0.467536 |
| AU040320      | chr4:126753543-126870070 | 10.6461  | 10.2229  | -0.0585 | 0.611327 |
| Ak2           | chr4:128991957-129011529 | 35.1024  | 33.8090  | -0.0542 | 0.484178 |
| Snord99       | chr4:132310690-132310764 | 28.9162  | 25.8481  | -0.1618 | 0.687496 |
| Slc9a1        | chr4:133369705-133423702 | 3.9822   | 4.0954   | 0.0404  | 0.837464 |
| Wnt4          | chr4:137277488-137299726 | 0.2193   | 0.1913   | -0.1969 | 0.633951 |
| Sh2d5         | chr4:138250402-138261332 | 0.2417   | 0.2727   | 0.1743  | 0.732112 |

|                      |                           |          |          |         |          |
|----------------------|---------------------------|----------|----------|---------|----------|
| <i>Prdm2</i>         | chr4:143107390-143212995  | 12.7996  | 12.3109  | -0.0562 | 0.610752 |
| <i>Ubiad1</i>        | chr4:148434494-148444771  | 4.5751   | 4.3477   | -0.0736 | 0.490816 |
| <i>Rpsa-ps12</i>     | chr4:149142496-149143388  | 0.9988   | 0.8592   | -0.2173 | 0.719245 |
| <i>Isg15</i>         | chr4:156199423-156200818  | 7.1870   | 7.5640   | 0.0738  | 0.832543 |
| <i>Mir1931</i>       | chr10:93162784-93162903   | 6.5525   | 7.3565   | 0.1670  | 0.726961 |
| <i>Trav7-4</i>       | chr14:53461098-53461736   | 1.6321   | 1.8394   | 0.1726  | 0.717270 |
| <i>Lct</i>           | chr1:128284755-128328318  | 0.1331   | 0.1491   | 0.1635  | 0.755306 |
| <i>Gm26265</i>       | chr8:95756949-95757082    | 9.8091   | 10.5800  | 0.1091  | 0.427136 |
| <i>Bet1l</i>         | chr7:140853383-140856383  | 20.5211  | 19.7476  | -0.0554 | 0.340941 |
| <i>Fam76a</i>        | chr4:132899212-132922558  | 10.1525  | 10.2681  | 0.0163  | 0.802622 |
| <i>Rpsa-ps4</i>      | chr11:33038815-33039703   | 0.8762   | 0.9707   | 0.1478  | 0.557211 |
| <i>Lig3</i>          | chr11:82781107-82804274   | 12.2280  | 12.3614  | 0.0157  | 0.870345 |
| <i>Mpp5</i>          | chr12:78748946-78840711   | 7.9262   | 7.6267   | -0.0556 | 0.533769 |
| <i>Ptgr2</i>         | chr12:84285231-84315832   | 7.6704   | 7.7541   | 0.0157  | 0.829316 |
| <i>Wdr37</i>         | chr13:8802967-8871909     | 13.9975  | 13.5501  | -0.0469 | 0.446483 |
| <i>Btf3</i>          | chr13:98309895-98317006   | 64.8755  | 66.4422  | 0.0344  | 0.844622 |
| <i>Arl15</i>         | chr13:113794504-114157461 | 4.3670   | 4.4719   | 0.0343  | 0.787676 |
| <i>Tpst2</i>         | chr5:112276690-112315361  | 52.4784  | 52.8750  | 0.0109  | 0.897628 |
| <i>Sart3</i>         | chr5:113742445-113771649  | 18.7183  | 18.0664  | -0.0511 | 0.503381 |
| <i>Heatr2</i>        | chr5:139150222-139186510  | 13.0881  | 12.5302  | -0.0628 | 0.610020 |
| <i>Gm21983</i>       | chr7:27168429-27181086    | 18.7167  | 19.0005  | 0.0217  | 0.850757 |
| <i>Uvrag</i>         | chr7:98886742-99141144    | 22.1972  | 21.4031  | -0.0526 | 0.496416 |
| <i>Lpar2</i>         | chr8:69822428-69831102    | 0.8670   | 0.9019   | 0.0570  | 0.757955 |
| <i>Cope</i>          | chr8:70302517-70312993    | 22.7482  | 21.8185  | -0.0602 | 0.606355 |
| <i>Nfix</i>          | chr8:84699875-84800344    | 1.1706   | 1.1062   | -0.0817 | 0.612405 |
| <i>Fam118b</i>       | chr9:35216964-35267805    | 4.5856   | 4.6703   | 0.0264  | 0.840247 |
| <i>Cbl</i>           | chr9:44149261-44234046    | 22.0450  | 22.5809  | 0.0347  | 0.873673 |
| <i>Cd3g</i>          | chr9:44969571-44980431    | 612.6831 | 586.2291 | -0.0637 | 0.657493 |
| <i>Leo1</i>          | chr9:75441523-75466432    | 14.3776  | 14.5747  | 0.0196  | 0.847765 |
| <i>Mon1a</i>         | chr9:107888128-107903125  | 10.3206  | 9.8449   | -0.0681 | 0.622606 |
| <i>Ubp1</i>          | chr9:113930933-113977199  | 44.4295  | 44.9222  | 0.0159  | 0.876971 |
| <i>Eny2</i>          | chr15:44428110-44437685   | 13.9614  | 13.3398  | -0.0657 | 0.614486 |
| <i>Puf60</i>         | chr15:76070183-76080946   | 85.5286  | 82.4398  | -0.0531 | 0.531538 |
| <i>Scx</i>           | chr15:76457437-76459468   | 0.9351   | 0.8204   | -0.1889 | 0.636593 |
| <i>Gm3636</i>        | chr14:6735684-6875155     | 0.5272   | 0.4682   | -0.1713 | 0.184634 |
| <i>Gm6904</i>        | chr14:59244440-59260216   | 4.5525   | 4.2225   | -0.1086 | 0.589959 |
| <i>Mir3547</i>       | chr17:25245540-25245650   | 12.0258  | 13.0546  | 0.1184  | 0.743631 |
| <i>Slc25a23</i>      | chr17:57043710-57059863   | 1.0264   | 0.9649   | -0.0891 | 0.593980 |
| <i>Msh2</i>          | chr17:87672329-87723713   | 22.6961  | 21.9260  | -0.0498 | 0.483504 |
| <i>Trap1</i>         | chr16:4039970-4077827     | 59.0669  | 59.2262  | 0.0039  | 0.886071 |
| <i>Tmem186</i>       | chr16:8633883-8637712     | 22.4868  | 21.7364  | -0.0490 | 0.297871 |
| <i>Heg1</i>          | chr16:33684465-33771576   | 4.6726   | 4.4801   | -0.0607 | 0.640940 |
| <i>Gm10785</i>       | chr16:91688910-91715642   | 3.5396   | 3.3376   | -0.0848 | 0.475838 |
| <i>Taf4b</i>         | chr18:14783244-14900359   | 12.5610  | 12.6502  | 0.0102  | 0.844092 |
| <i>Gm5239</i>        | chr18:35536582-35536951   | 22.3630  | 20.6881  | -0.1123 | 0.722723 |
| <i>Tmem127</i>       | chr2:127247907-127261107  | 29.6486  | 29.8067  | 0.0077  | 0.866141 |
| <i>Fxr1</i>          | chr3:34020078-34069342    | 56.1916  | 54.1181  | -0.0542 | 0.572251 |
| <i>Ccnc</i>          | chr4:21727700-21759922    | 10.2808  | 10.4882  | 0.0288  | 0.848432 |
| <i>Reck</i>          | chr4:43875529-43944806    | 3.8611   | 3.9249   | 0.0236  | 0.805213 |
| <i>Mfsd2a</i>        | chr4:122946849-122961188  | 1.5335   | 1.3976   | -0.1340 | 0.713469 |
| <i>Tprgl</i>         | chr4:154157484-154160666  | 66.7191  | 64.3903  | -0.0513 | 0.522526 |
| <i>Pdk2</i>          | chr11:95026257-95041354   | 0.9195   | 0.9766   | 0.0869  | 0.746815 |
| <i>Fkbp3</i>         | chr12:65062435-65073944   | 143.1207 | 146.0567 | 0.0293  | 0.854661 |
| <i>Rdh11</i>         | chr12:79174336-79192293   | 12.0019  | 12.1584  | 0.0187  | 0.836172 |
| <i>Parg</i>          | chr14:32201948-32297550   | 27.3979  | 26.3969  | -0.0537 | 0.585105 |
| <i>Nckap1</i>        | chr2:80500511-80581380    | 4.6991   | 4.4958   | -0.0638 | 0.577768 |
| <i>Ube2z</i>         | chr11:96047431-96065388   | 21.1001  | 20.3568  | -0.0517 | 0.559854 |
| <i>Alg10b</i>        | chr15:90224310-90230554   | 13.5344  | 13.6901  | 0.0165  | 0.844158 |
| <i>Cyp20a1</i>       | chr1:60343322-60388060    | 6.9200   | 6.5817   | -0.0723 | 0.597409 |
| <i>Gm15675</i>       | chr1:130429780-130437191  | 8.9794   | 9.2295   | 0.0396  | 0.844889 |
| <i>Ctu1</i>          | chr7:43672015-43678298    | 6.3094   | 6.4390   | 0.0293  | 0.816398 |
| <i>Farsb</i>         | chr1:78417957-78488859    | 40.5306  | 40.9840  | 0.0161  | 0.856439 |
| <i>Shf</i>           | chr2:122348891-122369162  | 2.7438   | 2.5569   | -0.1018 | 0.685662 |
| <i>Rab3a</i>         | chr8:70754678-70758677    | 3.3664   | 3.1770   | -0.0836 | 0.561955 |
| <i>4930539E08Rik</i> | chr17:28896396-28915324   | 0.7919   | 0.7328   | -0.1118 | 0.606041 |
| <i>Zfp867</i>        | chr11:59461196-59472474   | 4.0725   | 4.1620   | 0.0314  | 0.811131 |
| <i>Klf7</i>          | chr7:79698098-79714186    | 1.9104   | 1.7763   | -0.1050 | 0.734876 |
| <i>Mrps27</i>        | chr13:99344785-99415561   | 8.0082   | 7.6426   | -0.0674 | 0.486977 |
| <i>Eif2b4</i>        | chr5:31187557-31193430    | 14.9483  | 14.4267  | -0.0512 | 0.312427 |
| <i>Gm4604</i>        | chr6:108140119-108140509  | 11.9155  | 12.5182  | 0.0712  | 0.773714 |
| <i>Hoxb4</i>         | chr11:96316683-96321638   | 0.7310   | 0.7733   | 0.0813  | 0.737822 |

|                      |                           |          |          |         |          |
|----------------------|---------------------------|----------|----------|---------|----------|
| <i>Hist1h1c</i>      | chr13:23738806-23740366   | 187.0398 | 191.1303 | 0.0312  | 0.871016 |
| <i>Smad5</i>         | chr13:56703009-56742377   | 13.1444  | 13.2758  | 0.0144  | 0.874364 |
| <i>Sh3tc1</i>        | chr5:35697179-35729276    | 0.6072   | 0.5662   | -0.1011 | 0.419668 |
| <i>Plac8</i>         | chr5:100553724-100572245  | 80.8813  | 82.3118  | 0.0253  | 0.880136 |
| <i>Casd1</i>         | chr6:4600839-4643381      | 21.1158  | 21.3304  | 0.0146  | 0.860040 |
| <i>Gm10244</i>       | chr6:39419886-39421294    | 4.5721   | 4.2231   | -0.1146 | 0.697626 |
| <i>Dctn1</i>         | chr6:83165919-83200117    | 14.7864  | 14.2554  | -0.0528 | 0.578626 |
| <i>Atp6v1e1</i>      | chr6:120795244-120822685  | 50.6265  | 48.6052  | -0.0588 | 0.584437 |
| <i>Gm15489</i>       | chr7:122139007-122159401  | 1.7355   | 1.5596   | -0.1542 | 0.687603 |
| <i>Mir762</i>        | chr7:127708486-127708562  | 13.0372  | 14.4215  | 0.1456  | 0.741465 |
| <i>Dhps</i>          | chr8:85071756-85075162    | 15.5312  | 15.6669  | 0.0126  | 0.858362 |
| <i>Gm16167</i>       | chr8:85853372-85854437    | 1.0457   | 0.9054   | -0.2079 | 0.738937 |
| <i>Rgmb</i>          | chr17:15806252-15826586   | 3.5259   | 3.3339   | -0.0808 | 0.667455 |
| <i>2700099C18Rik</i> | chr17:94750099-94775132   | 1.6930   | 1.7863   | 0.0774  | 0.826959 |
| <i>Ndufb8</i>        | chr19:44548571-44555440   | 16.2992  | 15.6371  | -0.0598 | 0.590501 |
| <i>Tram1</i>         | chr1:13564701-13589864    | 142.3929 | 137.3679 | -0.0518 | 0.563189 |
| <i>Wdr12</i>         | chr1:60076867-60098645    | 9.4822   | 9.1129   | -0.0573 | 0.541516 |
| <i>Ahctf1</i>        | chr1:179744893-179803680  | 32.7025  | 31.6939  | -0.0452 | 0.430030 |
| <i>Fpgs</i>          | chr2:32682608-32704137    | 6.2546   | 5.9879   | -0.0629 | 0.594647 |
| <i>Ino80</i>         | chr2:119373041-119477687  | 21.0532  | 21.1661  | 0.0077  | 0.899656 |
| <i>Cstf1</i>         | chr2:172370680-172382448  | 17.7843  | 17.8940  | 0.0089  | 0.879525 |
| <i>Olfml3</i>        | chr3:103722221-103738001  | 1.5798   | 1.6288   | 0.0441  | 0.758884 |
| <i>Pik3r3</i>        | chr4:116221617-116303056  | 0.9969   | 1.0292   | 0.0460  | 0.670103 |
| <i>Mir700</i>        | chr4:135416554-135416633  | 17.7342  | 19.2338  | 0.1171  | 0.648059 |
| <i>Orc5</i>          | chr5:22486484-22550429    | 20.0567  | 19.3286  | -0.0533 | 0.517780 |
| <i>Ccdc142os</i>     | chr6:83106607-83109054    | 8.4030   | 7.9807   | -0.0744 | 0.505784 |
| <i>Zfp1</i>          | chr8:122282140-122337251  | 10.0478  | 10.3410  | 0.0415  | 0.858177 |
| <i>Uba7</i>          | chr9:107975504-107984060  | 35.8238  | 34.3207  | -0.0618 | 0.665452 |
| <i>Gmpr2</i>         | chr14:55672234-55678750   | 22.3331  | 22.5460  | 0.0137  | 0.787213 |
| <i>NA</i>            | chr17:12232480-12271184   | 15.3884  | 14.8123  | -0.0551 | 0.532169 |
| <i>Fam120b</i>       | chr17:15396245-15433580   | 23.8266  | 23.0823  | -0.0458 | 0.402694 |
| <i>Uhrf1</i>         | chr17:56303320-56323486   | 5.3201   | 5.4435   | 0.0331  | 0.872410 |
| <i>Tomm70a</i>       | chr16:57121713-57154530   | 55.2743  | 55.6438  | 0.0096  | 0.879700 |
| <i>Angpt1</i>        | chr1:156838561-156861078  | 1.0778   | 0.9886   | -0.1246 | 0.689241 |
| <i>Egfl7</i>         | chr2:26580013-26593120    | 0.4527   | 0.4858   | 0.1017  | 0.790125 |
| <i>Gins1</i>         | chr2:150905399-150931280  | 2.2362   | 2.0767   | -0.1068 | 0.491473 |
| <i>Eif4e</i>         | chr3:138526190-138557599  | 13.1822  | 12.7308  | -0.0503 | 0.148212 |
| <i>4921514A10Rik</i> | chr4:141115659-141118087  | 7.2577   | 6.9448   | -0.0636 | 0.561076 |
| <i>Xpc</i>           | chr6:91489304-91515884    | 16.2222  | 16.3726  | 0.0133  | 0.868917 |
| <i>Psmg4</i>         | chr13:34162963-34178172   | 27.9631  | 26.4679  | -0.0793 | 0.660162 |
| <i>Proca1</i>        | chr11:78193391-78205763   | 0.6313   | 0.6814   | 0.1102  | 0.679231 |
| <i>2610008E11Rik</i> | chr10:79064373-79097600   | 12.2673  | 12.4817  | 0.0250  | 0.860959 |
| <i>Mrpl12</i>        | chr11:120484612-120489065 | 16.1691  | 15.4073  | -0.0696 | 0.665891 |
| <i>Pak1ip1</i>       | chr13:41001022-41013019   | 25.5837  | 24.7175  | -0.0497 | 0.457679 |
| <i>Tmem238</i>       | chr7:4784594-4789656      | 2.6756   | 2.8603   | 0.0963  | 0.801465 |
| <i>Bckdha</i>        | chr7:25629851-25658761    | 20.4975  | 19.6986  | -0.0574 | 0.528981 |
| <i>Ino80e</i>        | chr7:126851579-126862377  | 11.1158  | 11.2375  | 0.0157  | 0.850812 |
| <i>Crtam</i>         | chr9:40972752-41004628    | 29.9652  | 28.7382  | -0.0603 | 0.599128 |
| <i>Dyx1c1</i>        | chr9:72958784-72973064    | 3.1674   | 3.2620   | 0.0425  | 0.781820 |
| <i>Fbxw2</i>         | chr2:34804513-34826311    | 19.8070  | 19.8972  | 0.0066  | 0.896957 |
| <i>Nespas</i>        | chr2:174281236-174295436  | 1.0403   | 0.9555   | -0.1228 | 0.634757 |
| <i>Cdc5l</i>         | chr17:45391891-45433707   | 34.7342  | 34.9987  | 0.0109  | 0.854834 |
| <i>Comm1d1</i>       | chr11:22834743-22982382   | 17.7366  | 17.8249  | 0.0072  | 0.905027 |
| <i>Inca1</i>         | chr11:70688360-70700155   | 0.6978   | 0.6125   | -0.1880 | 0.638284 |
| <i>Coq5</i>          | chr5:115279665-115296972  | 16.0842  | 15.5032  | -0.0531 | 0.321121 |
| <i>Tm7sf3</i>        | chr6:146602351-146642824  | 7.9980   | 8.1030   | 0.0188  | 0.853772 |
| <i>Pih1d1</i>        | chr7:45154302-45160069    | 14.7601  | 14.1946  | -0.0564 | 0.459297 |
| <i>Jak3</i>          | chr8:71676295-71690575    | 29.1420  | 29.9230  | 0.0382  | 0.868640 |
| <i>Mrpl16</i>        | chr19:11770414-11774944   | 17.7760  | 17.0153  | -0.0631 | 0.522913 |
| <i>Coq10b</i>        | chr1:55052769-55072701    | 11.0131  | 10.5414  | -0.0632 | 0.532012 |
| <i>Romo1</i>         | chr2:156144038-156145797  | 21.0273  | 21.5297  | 0.0341  | 0.810884 |
| <i>Psmc4</i>         | chr7:28041706-28050101    | 49.7000  | 50.2978  | 0.0172  | 0.877230 |
| <i>D17Wsu92e</i>     | chr17:27751231-27820558   | 32.2535  | 31.0112  | -0.0567 | 0.636618 |
| <i>Ddx11</i>         | chr17:66123519-66152167   | 11.2377  | 10.7883  | -0.0589 | 0.608069 |
| <i>Ercc8</i>         | chr13:108158730-108195364 | 3.0330   | 2.9047   | -0.0623 | 0.537160 |
| <i>Ndufc2</i>        | chr7:97400002-97407802    | 41.9970  | 42.5648  | 0.0194  | 0.845529 |
| <i>Ambra1</i>        | chr2:91730133-91918849    | 17.7636  | 17.8955  | 0.0107  | 0.898375 |
| <i>Bri3bp</i>        | chr5:125441567-125460872  | 4.5169   | 4.3577   | -0.0518 | 0.390180 |
| <i>Slc25a28</i>      | chr19:43663821-43674881   | 21.4270  | 21.7529  | 0.0218  | 0.867112 |
| <i>Cmip</i>          | chr8:117257018-117461503  | 8.1525   | 8.3615   | 0.0365  | 0.866491 |
| <i>Cnynl1</i>        | chr1:64690454-64725644    | 1.5311   | 1.5895   | 0.0540  | 0.718398 |

|                      |                           |          |          |         |          |
|----------------------|---------------------------|----------|----------|---------|----------|
| <i>Rhd</i>           | chr4:134864535-134896172  | 1.1563   | 1.0462   | -0.1444 | 0.659330 |
| <i>Pgap3</i>         | chr11:98388676-98400490   | 3.4617   | 3.5507   | 0.0366  | 0.783447 |
| <i>NA</i>            | chr15:76721465-76723845   | 11.6341  | 11.0813  | -0.0702 | 0.646369 |
| <i>Ptprs</i>         | chr17:56412430-56476483   | 2.8047   | 2.6562   | -0.0785 | 0.703526 |
| <i>Cytip</i>         | chr2:58129136-58195532    | 105.2822 | 101.7944 | -0.0486 | 0.526497 |
| <i>Zdhhc18</i>       | chr4:133605298-133650154  | 38.5560  | 37.1028  | -0.0554 | 0.643335 |
| <i>Gm5421</i>        | chr10:22343438-22345792   | 1.4736   | 1.5397   | 0.0633  | 0.789756 |
| <i>Akap11</i>        | chr14:78492245-78536860   | 17.9557  | 17.3152  | -0.0524 | 0.597333 |
| <i>Rraga</i>         | chr4:86575672-86577281    | 11.2409  | 10.7301  | -0.0671 | 0.588149 |
| <i>Map4k5</i>        | chr12:69803749-69893200   | 2.1902   | 2.0836   | -0.0720 | 0.678788 |
| <i>Tlr1</i>          | chr5:64924810-64932761    | 54.9936  | 55.0965  | 0.0027  | 0.938844 |
| <i>Atp2a1</i>        | chr7:126445857-126463108  | 1.0585   | 0.9889   | -0.0982 | 0.470746 |
| <i>Bcap31</i>        | chrX:73686177-73716175    | 86.3399  | 83.1281  | -0.0547 | 0.570134 |
| <i>Eif1ad</i>        | chr19:5366812-5371511     | 22.8724  | 22.0100  | -0.0554 | 0.538358 |
| <i>Gm4956</i>        | chr1:21285245-21298312    | 1.1522   | 1.2745   | 0.1455  | 0.808131 |
| <i>ligp1</i>         | chr18:60376028-60392627   | 34.7284  | 36.9086  | 0.0878  | 0.783446 |
| <i>Gapvd1</i>        | chr2:34676183-34755232    | 25.7846  | 24.9693  | -0.0464 | 0.467658 |
| <i>5430405H02Rik</i> | chr2:156852429-156862945  | 4.9873   | 4.6838   | -0.0906 | 0.633813 |
| <i>Sigmar1</i>       | chr4:41738492-41756157    | 8.7771   | 8.4115   | -0.0614 | 0.625333 |
| <i>1700021J08Rik</i> | chr4:117002165-117003012  | 22.5452  | 22.9749  | 0.0272  | 0.806016 |
| <i>Gm25788</i>       | chr4:123291343-123291474  | 23.0791  | 24.5852  | 0.0912  | 0.825912 |
| <i>lft20</i>         | chr11:78536360-78541737   | 23.8992  | 22.7910  | -0.0685 | 0.644591 |
| <i>Ska2</i>          | chr11:87109233-87124635   | 5.1571   | 5.2453   | 0.0245  | 0.835736 |
| <i>Gm25776</i>       | chr12:91573429-91573572   | 117.6039 | 101.7693 | -0.2086 | 0.712056 |
| <i>4930595D18Rik</i> | chr12:111159849-111184491 | 2.0122   | 2.1818   | 0.1167  | 0.725251 |
| <i>Nrbp1</i>         | chr5:31240863-31251566    | 47.9134  | 48.1930  | 0.0084  | 0.910636 |
| <i>Por</i>           | chr5:135670032-135735326  | 10.2673  | 10.4053  | 0.0193  | 0.859734 |
| <i>Mmaa</i>          | chr8:79266423-79294956    | 2.8384   | 2.9064   | 0.0342  | 0.791673 |
| <i>Pard6a</i>        | chr8:105701153-105703493  | 3.8819   | 3.6638   | -0.0834 | 0.415181 |
| <i>Gm16124</i>       | chr9:53667245-53681265    | 14.1865  | 13.2282  | -0.1009 | 0.711368 |
| <i>Man2c1os</i>      | chr9:57099949-57131290    | 8.3074   | 8.4391   | 0.0227  | 0.787405 |
| <i>Mrps22</i>        | chr9:98588732-98601679    | 20.6655  | 19.8507  | -0.0580 | 0.452624 |
| <i>Bcor1</i>         | chrX:48341357-48408049    | 1.0108   | 0.9552   | -0.0817 | 0.695130 |
| <i>Gm15009</i>       | chrX:136802911-136803233  | 4.2145   | 3.7046   | -0.1860 | 0.739309 |
| <i>Mrpl13</i>        | chr15:55534093-55557748   | 3.9726   | 4.0359   | 0.0228  | 0.855200 |
| <i>Cbx7</i>          | chr15:7915806-79971119    | 30.0629  | 28.9137  | -0.0562 | 0.659602 |
| <i>Gm18284</i>       | chr15:81674254-81674878   | 1.8077   | 1.9571   | 0.1146  | 0.647754 |
| <i>Gpalpp1</i>       | chr14:76086231-76110815   | 20.3975  | 19.7499  | -0.0466 | 0.437180 |
| <i>Jmjd8</i>         | chr17:25828866-25831842   | 28.1890  | 27.1964  | -0.0517 | 0.493701 |
| <i>Zfp472</i>        | chr17:32965813-32979233   | 16.5752  | 15.8404  | -0.0654 | 0.649323 |
| <i>Gpsm3</i>         | chr17:34589805-34591754   | 51.4399  | 52.2084  | 0.0214  | 0.876943 |
| <i>Epcam</i>         | chr17:87635978-87651106   | 1.5941   | 1.6751   | 0.0715  | 0.786605 |
| <i>Trmt10c</i>       | chr16:56032608-56037819   | 33.4448  | 32.1354  | -0.0576 | 0.619774 |
| <i>Yme1l1</i>        | chr2:23156368-23199260    | 41.4278  | 41.8590  | 0.0149  | 0.882931 |
| <i>Plekha3</i>       | chr2:76675280-76696828    | 18.5587  | 17.9694  | -0.0465 | 0.284948 |
| <i>Ddb2</i>          | chr2:91211571-91236982    | 41.6336  | 41.8509  | 0.0075  | 0.910299 |
| <i>Bambi-ps1</i>     | chr2:122466934-122467526  | 23.5854  | 22.4889  | -0.0687 | 0.623737 |
| <i>Ndufaf5</i>       | chr2:140170648-140203689  | 8.5451   | 8.6837   | 0.0232  | 0.769987 |
| <i>Znf512b</i>       | chr2:181582102-181592803  | 14.0573  | 14.2485  | 0.0195  | 0.882205 |
| <i>Mgst2</i>         | chr3:51660359-51682675    | 19.9589  | 19.3009  | -0.0484 | 0.484044 |
| <i>Aph1a</i>         | chr3:95893968-95898288    | 3.0878   | 3.1754   | 0.0404  | 0.793664 |
| <i>Amy1</i>          | chr3:113555709-113606699  | 6.2634   | 6.3781   | 0.0262  | 0.816966 |
| <i>Akirin1</i>       | chr4:123734558-123750345  | 22.5133  | 21.7402  | -0.0504 | 0.508982 |
| <i>Agfg2</i>         | chr5:137650482-137684726  | 8.4866   | 8.1434   | -0.0596 | 0.577943 |
| <i>NA</i>            | chrX:12134458-12160346    | 5.1888   | 4.9013   | -0.0822 | 0.639781 |
| <i>Tmem55b</i>       | chr14:50926069-50930856   | 20.9118  | 21.0272  | 0.0079  | 0.890686 |
| <i>Scand1</i>        | chr2:156311846-156312704  | 61.2233  | 63.2940  | 0.0480  | 0.857711 |
| <i>Sox15</i>         | chr11:69655313-69656727   | 1.0159   | 0.8934   | -0.1855 | 0.613444 |
| <i>Card11</i>        | chr5:140872998-141000596  | 41.4304  | 41.7765  | 0.0120  | 0.905802 |
| <i>Parp6</i>         | chr9:59617283-59650290    | 17.2287  | 16.6559  | -0.0488 | 0.426245 |
| <i>Hist2h2ab</i>     | chr3:96219864-96220308    | 12.8573  | 12.0561  | -0.0928 | 0.674243 |
| <i>Dr1</i>           | chr5:108268896-108280526  | 25.9938  | 25.1573  | -0.0472 | 0.486153 |
| <i>Tmem69</i>        | chr4:116551632-116555936  | 5.9600   | 6.1241   | 0.0392  | 0.824098 |
| <i>Lsm6</i>          | chr8:78804864-78821140    | 9.5508   | 9.6410   | 0.0136  | 0.853558 |
| <i>Ndst2</i>         | chr14:20723738-20730327   | 9.1170   | 8.7596   | -0.0577 | 0.583850 |
| <i>AI467606</i>      | chr7:127091435-127094049  | 125.0595 | 120.7739 | -0.0503 | 0.544304 |
| <i>Rasa3</i>         | chr8:13566949-13677603    | 157.9114 | 158.3403 | 0.0039  | 0.946895 |
| <i>9330154K18Rik</i> | chr15:57717803-57738666   | 1.8686   | 1.9547   | 0.0650  | 0.845769 |
| <i>Gm21987</i>       | chr16:38347039-38362297   | 30.5277  | 31.7564  | 0.0569  | 0.840255 |
| <i>Lrrc75b</i>       | chr10:75550124-75560330   | 3.4790   | 3.5698   | 0.0372  | 0.826896 |
| <i>Kcnnh4</i>        | chr11:100740375-100759942 | 0.3953   | 0.4208   | 0.0900  | 0.527518 |

|                      |                           |          |          |         |          |
|----------------------|---------------------------|----------|----------|---------|----------|
| <i>Mrps7</i>         | chr11:115603924-115608036 | 17.9991  | 17.3122  | -0.0561 | 0.570931 |
| <i>Utp15</i>         | chr13:98246844-98262992   | 20.0985  | 19.4255  | -0.0491 | 0.508525 |
| <i>Tmem33</i>        | chr5:67260564-67291461    | 10.8347  | 10.9405  | 0.0140  | 0.885627 |
| <i>Fxyd4</i>         | chr6:117933728-117937335  | 1.1592   | 1.0401   | -0.1564 | 0.643172 |
| <i>Ccdc101</i>       | chr7:126649308-126672925  | 16.9546  | 17.1008  | 0.0124  | 0.764495 |
| <i>Traj38</i>        | chr14:54180573-54180635   | 15.1269  | 16.5155  | 0.1267  | 0.776880 |
| <i>Abcc4</i>         | chr14:118482691-118706219 | 11.7784  | 11.4011  | -0.0470 | 0.420567 |
| <i>Apom</i>          | chr17:35128996-35132050   | 2.2713   | 2.4041   | 0.0820  | 0.707758 |
| <i>Gm6767</i>        | chr16:51362451-51363832   | 2.7656   | 2.8816   | 0.0593  | 0.764010 |
| <i>Rab14</i>         | chr2:35180204-35201120    | 25.3163  | 24.5081  | -0.0468 | 0.501953 |
| <i>Pde11a</i>        | chr2:75989140-76338774    | 1.4335   | 1.3572   | -0.0789 | 0.589980 |
| <i>Cdc42</i>         | chr4:137319695-137357720  | 207.0968 | 209.1655 | 0.0143  | 0.880991 |
| <i>Prodh</i>         | chr16:18060356-18090203   | 0.3468   | 0.3130   | -0.1481 | 0.368608 |
| <i>Pggt1b</i>        | chr18:46239948-46280850   | 9.9838   | 10.0956  | 0.0161  | 0.820159 |
| <i>NA</i>            | chr1:91928784-91931176    | 10.1049  | 9.6260   | -0.0700 | 0.701339 |
| <i>Insig2</i>        | chr1:121304352-121332589  | 5.3663   | 5.1532   | -0.0584 | 0.533721 |
| <i>Fam83d</i>        | chr2:158768092-158786637  | 0.2565   | 0.2861   | 0.1580  | 0.804682 |
| <i>Kcnmb4</i>        | chr10:116417860-116473878 | 2.9493   | 2.7992   | -0.0753 | 0.639305 |
| <i>Tgfb1</i>         | chr13:56609602-56639339   | 0.3077   | 0.2626   | -0.2288 | 0.762661 |
| <i>Gbp6</i>          | chr5:105270703-105293699  | 18.4323  | 18.9234  | 0.0379  | 0.870629 |
| <i>Rps3</i>          | chr7:99477895-99483738    | 538.5091 | 550.0264 | 0.0305  | 0.868305 |
| <i>Cdc42ep3</i>      | chr17:79334024-79355091   | 16.9494  | 17.1110  | 0.0137  | 0.852782 |
| <i>1810012K08Rik</i> | chr2:26138545-26139543    | 14.5668  | 13.6148  | -0.0975 | 0.686423 |
| <i>Gm7741</i>        | chr3:35863876-35864865    | 1.2212   | 1.0939   | -0.1587 | 0.702475 |
| <i>Tgm2</i>          | chr2:158116401-158146436  | 0.2061   | 0.2277   | 0.1437  | 0.817258 |
| <i>Zfp942</i>        | chr17:21926959-21962464   | 16.2470  | 15.6061  | -0.0581 | 0.658831 |
| <i>Hmcn2</i>         | chr2:31314414-31460738    | 0.0609   | 0.0674   | 0.1448  | 0.693393 |
| <i>Pram1</i>         | chr17:33638055-33645706   | 1.5326   | 1.5945   | 0.0571  | 0.780066 |
| <i>Sirpa</i>         | chr2:129592834-129632228  | 0.2281   | 0.2539   | 0.1547  | 0.828283 |
| <i>Gtse1</i>         | chr15:85859706-85876572   | 1.4911   | 1.5719   | 0.0762  | 0.843344 |
| <i>Glod4</i>         | chr11:76120986-76243725   | 13.0754  | 12.6287  | -0.0502 | 0.475315 |
| <i>Ogfod3</i>        | chr11:121177590-121204711 | 2.7858   | 2.5978   | -0.1008 | 0.614581 |
| <i>B3glct</i>        | chr5:149678229-149762599  | 2.5469   | 2.6029   | 0.0314  | 0.835641 |
| <i>1700028E10Rik</i> | chr5:151368708-151414083  | 2.2131   | 2.2763   | 0.0406  | 0.713331 |
| <i>Rab19</i>         | chr6:39381174-39390380    | 17.0657  | 17.2480  | 0.0153  | 0.859252 |
| <i>Zfp882</i>        | chr8:71908607-71916354    | 7.3068   | 7.3870   | 0.0158  | 0.775456 |
| <i>Cdt1</i>          | chr8:122568014-122573128  | 17.1875  | 16.5454  | -0.0549 | 0.565255 |
| <i>Arhgap20</i>      | chr9:51765336-51853856    | 0.1177   | 0.1050   | -0.1641 | 0.670628 |
| <i>Lamb2</i>         | chr9:108479861-108490530  | 0.1998   | 0.2164   | 0.1152  | 0.723596 |
| <i>Csnk1e</i>        | chr15:79417855-79443919   | 4.6807   | 4.5028   | -0.0559 | 0.605806 |
| <i>Ccar2</i>         | chr14:70138176-70153811   | 30.2294  | 29.2570  | -0.0472 | 0.524700 |
| <i>Cmtr1</i>         | chr17:29549798-29705979   | 26.4091  | 26.5612  | 0.0083  | 0.925514 |
| <i>Dxo</i>           | chr17:34837018-34839233   | 12.3802  | 12.5538  | 0.0201  | 0.849038 |
| <i>Sf1</i>           | chr19:6363689-6378030     | 37.9133  | 38.0779  | 0.0063  | 0.933902 |
| <i>Abi2</i>          | chr1:60409618-60481162    | 3.2255   | 3.0897   | -0.0620 | 0.576466 |
| <i>4921507L20Rik</i> | chr2:93980033-93983575    | 1.6707   | 1.7891   | 0.0988  | 0.816867 |
| <i>Prmt6</i>         | chr3:110246111-110250998  | 12.0319  | 12.1724  | 0.0168  | 0.864653 |
| <i>1110037F02Rik</i> | chr4:11485957-11550684    | 34.6623  | 34.6886  | 0.0011  | 0.973261 |
| <i>Gm26049</i>       | chr4:41312090-41312198    | 12.7776  | 11.5334  | -0.1478 | 0.709153 |
| <i>Tfip11</i>        | chr5:112326357-112338073  | 11.0741  | 10.6313  | -0.0589 | 0.627228 |
| <i>Rapc1a</i>        | chr5:145083829-145108761  | 12.6009  | 12.1527  | -0.0523 | 0.487026 |
| <i>Rabep2</i>        | chr7:126428758-126449245  | 10.2186  | 10.3389  | 0.0169  | 0.890906 |
| <i>Upf3a</i>         | chr8:13785614-13798538    | 19.2145  | 19.6535  | 0.0326  | 0.851264 |
| <i>Tead3</i>         | chr17:28331670-28350805   | 0.2309   | 0.2498   | 0.1131  | 0.525393 |
| <i>Lpin2</i>         | chr17:71182559-71249817   | 5.3203   | 5.0969   | -0.0619 | 0.690200 |
| <i>Traf3ip3</i>      | chr1:193175505-193201703  | 105.8127 | 102.7160 | -0.0429 | 0.445349 |
| <i>Dpp7</i>          | chr2:25352275-25356359    | 3.7857   | 3.8713   | 0.0322  | 0.851375 |
| <i>Tomm34</i>        | chr2:164053539-164071169  | 36.5879  | 36.7246  | 0.0054  | 0.929873 |
| <i>Vps45</i>         | chr3:95999831-96058466    | 5.2710   | 5.0331   | -0.0666 | 0.595727 |
| <i>Gm12869</i>       | chr4:107349038-107351353  | 2.6199   | 2.3091   | -0.1822 | 0.671389 |
| <i>Snord55</i>       | chr4:117155769-117155848  | 21.5581  | 22.9384  | 0.0895  | 0.661002 |
| <i>Ube2b</i>         | chr11:51985496-52000762   | 38.6361  | 37.4249  | -0.0460 | 0.385394 |
| <i>Zfp511</i>        | chr7:140036390-140040605  | 23.4458  | 23.7752  | 0.0201  | 0.878610 |
| <i>Pdp2</i>          | chr8:104591467-104596836  | 9.6485   | 9.7592   | 0.0165  | 0.857845 |
| <i>Hyal3</i>         | chr9:107580817-107587359  | 0.9392   | 1.0001   | 0.0907  | 0.730838 |
| <i>Nipbl</i>         | chr15:8291224-8444463     | 59.9927  | 60.4005  | 0.0098  | 0.902236 |
| <i>Ehd3</i>          | chr17:73804840-73832093   | 48.7954  | 48.8812  | 0.0025  | 0.957997 |
| <i>Ergic3</i>        | chr2:156008044-156018279  | 15.9933  | 16.2231  | 0.0206  | 0.865905 |
| <i>Acadm</i>         | chr3:153922356-153944632  | 20.3157  | 20.5376  | 0.0157  | 0.870122 |
| <i>Aebp1</i>         | chr11:5861946-5872088     | 0.1902   | 0.1677   | -0.1820 | 0.578798 |
| <i>Gm15893</i>       | chr11:88356290-88363947   | 1.5163   | 1.6147   | 0.0906  | 0.789485 |



|                      |                           |          |          |         |          |
|----------------------|---------------------------|----------|----------|---------|----------|
| <i>Men1</i>          | chr19:6334978-6340891     | 18.5452  | 18.7759  | 0.0178  | 0.879765 |
| <i>Polr2k-ps</i>     | chr11:95761490-95761665   | 9.3987   | 10.1595  | 0.1123  | 0.758422 |
| <i>Egln2</i>         | chr7:27158657-27166802    | 20.5450  | 19.7282  | -0.0585 | 0.640739 |
| <i>Gm26551</i>       | chr11:51949881-52269514   | 13.0331  | 12.3674  | -0.0756 | 0.737639 |
| <i>Slc25a39</i>      | chr11:102402984-102407946 | 9.7365   | 9.9266   | 0.0279  | 0.867423 |
| <i>Zscan21</i>       | chr5:138116902-138134265  | 7.4247   | 7.1350   | -0.0574 | 0.572634 |
| <i>Herc3</i>         | chr6:58831464-58920398    | 33.8808  | 33.8973  | 0.0007  | 0.985707 |
| <i>Itpr2</i>         | chr6:146108298-146502223  | 36.9912  | 35.8289  | -0.0461 | 0.567438 |
| <i>Zfp865</i>        | chr7:5020375-5033138      | 6.9639   | 6.6244   | -0.0721 | 0.723606 |
| <i>Ech1</i>          | chr7:28825216-28832247    | 24.0041  | 23.0932  | -0.0558 | 0.598257 |
| <i>Mical2</i>        | chr7:112225855-112355194  | 0.1646   | 0.1471   | -0.1624 | 0.717832 |
| <i>Gpr124</i>        | chr8:27085582-27123436    | 0.4506   | 0.4726   | 0.0686  | 0.668891 |
| <i>Rfwd3</i>         | chr8:111270943-111300222  | 7.7798   | 7.8611   | 0.0150  | 0.859265 |
| <i>Gan</i>           | chr8:117158134-117205834  | 2.8678   | 2.9533   | 0.0424  | 0.830439 |
| <i>Nudcd1</i>        | chr15:44375226-44428307   | 9.7311   | 9.3364   | -0.0597 | 0.607655 |
| <i>Prpf40b</i>       | chr15:99295086-99317018   | 2.0289   | 2.0808   | 0.0365  | 0.830158 |
| <i>Ap1g2</i>         | chr14:55098577-55106593   | 18.6076  | 17.8863  | -0.0570 | 0.649156 |
| <i>Sele</i>          | chr1:164048233-164057677  | 3.2201   | 3.0487   | -0.0789 | 0.710792 |
| <i>1110051M20Rik</i> | chr2:91275067-91444704    | 7.6598   | 7.7280   | 0.0128  | 0.880871 |
| <i>Pank2</i>         | chr2:131262494-131299188  | 22.4595  | 22.6020  | 0.0091  | 0.899356 |
| <i>Gm12350</i>       | chr4:34485831-34486293    | 3.6775   | 3.2417   | -0.1820 | 0.760367 |
| <i>Sesn2</i>         | chr4:132492031-132510501  | 1.5998   | 1.4936   | -0.0991 | 0.733096 |
| <i>Acap3</i>         | chr4:155891821-155907251  | 7.9012   | 7.5934   | -0.0573 | 0.623268 |
| <i>G430095P16Rik</i> | chr8:84723006-84726844    | 14.1299  | 13.4310  | -0.0732 | 0.624137 |
| <i>Syn3</i>          | chr10:86055124-86498896   | 0.0621   | 0.0539   | -0.2028 | 0.676874 |
| <i>Tgtp2</i>         | chr11:49057193-49064206   | 44.0442  | 44.6227  | 0.0188  | 0.880993 |
| <i>Wdr1</i>          | chr5:38526813-38561666    | 237.4454 | 238.6383 | 0.0072  | 0.920971 |
| <i>Aff1</i>          | chr5:103692373-103855322  | 9.2477   | 9.3967   | 0.0231  | 0.890302 |
| <i>Slc26a1</i>       | chr5:108669877-108675569  | 2.5956   | 2.6515   | 0.0308  | 0.797151 |
| <i>Tbl2</i>          | chr5:135149656-135163873  | 5.6159   | 5.7115   | 0.0244  | 0.874243 |
| <i>Gm26738</i>       | chr6:17834584-17835185    | 1.7178   | 1.5276   | -0.1693 | 0.567646 |
| <i>Nup210</i>        | chr6:91013067-91116829    | 96.0431  | 92.2771  | -0.0577 | 0.690147 |
| <i>Cracr2a</i>       | chr6:127577974-127629938  | 34.2005  | 34.7228  | 0.0219  | 0.888806 |
| <i>Zfp940</i>        | chr7:29833619-29853669    | 4.0744   | 3.8853   | -0.0686 | 0.672100 |
| <i>Mvb12a</i>        | chr8:71542929-71548024    | 28.2466  | 26.8154  | -0.0750 | 0.697964 |
| <i>Hsf4</i>          | chr8:105269800-105275845  | 0.6303   | 0.6959   | 0.1428  | 0.779322 |
| <i>4931428F04Rik</i> | chr8:105280409-105289528  | 1.0169   | 0.9546   | -0.0913 | 0.481357 |
| <i>Siae</i>          | chr9:37613846-37648318    | 8.1291   | 7.8422   | -0.0518 | 0.288527 |
| <i>Uqcrc1</i>        | chr9:108936647-108949640  | 70.4360  | 70.8418  | 0.0083  | 0.919948 |
| <i>Sh2d1a</i>        | chrX:42502452-42523697    | 14.4372  | 13.8713  | -0.0577 | 0.584832 |
| <i>Las1l</i>         | chrX:95935334-95956962    | 6.7591   | 6.8035   | 0.0094  | 0.912306 |
| <i>Atp6v1c1</i>      | chr15:38661903-38692443   | 33.6663  | 32.4512  | -0.0530 | 0.607941 |
| <i>Zfp647</i>        | chr15:76910850-76918010   | 1.0143   | 0.9210   | -0.1392 | 0.621778 |
| <i>Txn2</i>          | chr15:77915046-77929006   | 14.5564  | 14.8040  | 0.0243  | 0.873853 |
| <i>Smarcd1</i>       | chr15:99702286-99713995   | 10.1720  | 10.3145  | 0.0201  | 0.880204 |
| <i>4933413J09Rik</i> | chr14:26356573-26400456   | 0.2017   | 0.1816   | -0.1514 | 0.446664 |
| <i>Sdr39u1</i>       | chr14:55897285-55900232   | 44.9521  | 45.2422  | 0.0093  | 0.900694 |
| <i>Snora31</i>       | chr14:75847904-75848034   | 39.2607  | 36.9896  | -0.0860 | 0.612390 |
| <i>Abhd16a</i>       | chr17:35089262-35102987   | 14.3006  | 14.5004  | 0.0200  | 0.882248 |
| <i>Cnpy3</i>         | chr17:46735704-46752214   | 14.4968  | 13.9660  | -0.0538 | 0.495445 |
| <i>Camkmt</i>        | chr17:85090725-85458139   | 1.8138   | 1.6647   | -0.1237 | 0.597255 |
| <i>B3gnt1</i>        | chr19:5038825-5041134     | 4.6196   | 4.3929   | -0.0726 | 0.569588 |
| <i>Dusp5</i>         | chr19:53529108-53542431   | 8.7184   | 8.3546   | -0.0615 | 0.601429 |
| <i>Chst10</i>        | chr1:38863876-38898160    | 7.3061   | 7.0184   | -0.0580 | 0.585385 |
| <i>Dars</i>          | chr1:128363707-128417416  | 59.3981  | 60.0557  | 0.0159  | 0.885945 |
| <i>Slamf6</i>        | chr1:171917536-171943868  | 73.1241  | 73.4879  | 0.0072  | 0.932948 |
| <i>Mrrf</i>          | chr2:36136388-36190647    | 5.2564   | 5.0327   | -0.0627 | 0.492919 |
| <i>Metap1d</i>       | chr2:71453275-71525194    | 11.4442  | 11.0261  | -0.0537 | 0.597630 |
| <i>Ctnnb1</i>        | chr2:157737400-157891614  | 31.9020  | 30.6323  | -0.0586 | 0.642896 |
| <i>3110057O12Rik</i> | chr3:40846969-40938138    | 3.9562   | 4.0228   | 0.0241  | 0.885161 |
| <i>S100a11</i>       | chr3:93520487-93526287    | 2.9112   | 3.1480   | 0.1128  | 0.807964 |
| <i>Sec61b</i>        | chr4:47474657-47483242    | 32.5440  | 33.3358  | 0.0347  | 0.856128 |
| <i>Minos1</i>        | chr4:139101813-139131113  | 9.4586   | 9.7213   | 0.0395  | 0.854886 |
| <i>Phf13</i>         | chr4:151989632-151996258  | 3.4501   | 3.2289   | -0.0956 | 0.762356 |
| <i>Spaca6</i>        | chr17:17830718-17843009   | 0.1533   | 0.1703   | 0.1523  | 0.791212 |
| <i>Sf3a2</i>         | chr10:80798197-80804924   | 7.7625   | 7.9071   | 0.0266  | 0.843579 |
| <i>Rbm39</i>         | chr2:156147238-156180238  | 167.4264 | 168.1656 | 0.0064  | 0.923316 |
| <i>Ccdc28b</i>       | chr4:129619273-129623947  | 5.5448   | 5.6476   | 0.0265  | 0.824971 |
| <i>Chd5</i>          | chr4:152338650-152390194  | 0.2263   | 0.2383   | 0.0740  | 0.639564 |
| <i>Pno1</i>          | chr11:17203197-17211568   | 17.3293  | 17.5773  | 0.0205  | 0.862534 |
| <i>Sf3b1</i>         | chr1:54985168-55027478    | 292.1243 | 282.1361 | -0.0502 | 0.623705 |

|               |                           |          |          |         |          |
|---------------|---------------------------|----------|----------|---------|----------|
| Mroh8         | chr2:157208549-157279549  | 0.5402   | 0.5690   | 0.0749  | 0.736310 |
| Gm15952       | chr3:35933044-35942717    | 1.7594   | 1.5682   | -0.1660 | 0.743085 |
| Dmap1         | chr4:117674680-117682273  | 10.8604  | 10.9587  | 0.0130  | 0.864488 |
| Numbl         | chr7:27258432-27282144    | 0.4041   | 0.4221   | 0.0627  | 0.806941 |
| Rassf3        | chr10:121410349-121476250 | 9.5856   | 9.7283   | 0.0213  | 0.861587 |
| Cand2         | chr6:115774537-115804893  | 2.5617   | 2.6079   | 0.0258  | 0.830176 |
| 1700052N19Rik | chr10:4432466-4455141     | 4.6712   | 4.5037   | -0.0527 | 0.491676 |
| Cd164         | chr10:41519499-41531042   | 117.4099 | 117.7284 | 0.0039  | 0.946141 |
| Dapk3         | chr10:81183006-81193197   | 20.1327  | 19.3701  | -0.0557 | 0.594331 |
| Nudt4         | chr10:95547006-95564167   | 9.4602   | 9.5549   | 0.0144  | 0.878660 |
| Rab5b         | chr10:128677192-128696268 | 11.2843  | 11.3590  | 0.0095  | 0.812370 |
| Nprl3         | chr11:32225627-32267707   | 6.7434   | 6.8088   | 0.0139  | 0.902858 |
| D130020L05Rik | chr12:101082480-101088927 | 16.5079  | 16.8874  | 0.0328  | 0.879563 |
| Hnrnpk        | chr13:58391141-58403343   | 62.6985  | 62.9779  | 0.0064  | 0.921974 |
| E130116L18Rik | chr5:25222847-25223153    | 2.6645   | 2.9401   | 0.1420  | 0.748348 |
| Prkar1b       | chr5:139017305-139150001  | 0.3271   | 0.2975   | -0.1371 | 0.577298 |
| Wdr91         | chr6:34880425-34910876    | 11.1952  | 10.8027  | -0.0515 | 0.492368 |
| Rnf181        | chr6:72359713-72362721    | 29.7767  | 28.7859  | -0.0488 | 0.471007 |
| A530021J07Rik | chr7:83148643-83155922    | 3.3657   | 3.5787   | 0.0885  | 0.573221 |
| Rnf169        | chr7:99920256-99980458    | 11.9042  | 11.9293  | 0.0030  | 0.945021 |
| Pcid2         | chr8:13077188-13105459    | 12.3551  | 11.9052  | -0.0535 | 0.567588 |
| Gm11175       | chr8:70699537-70700080    | 113.9535 | 119.2469 | 0.0655  | 0.815615 |
| Slc38a7       | chr8:95835919-95853539    | 3.1571   | 3.2108   | -0.0684 | 0.571987 |
| Ube2cbp       | chr9:86307233-86464950    | 4.4719   | 4.5849   | 0.0360  | 0.773561 |
| Gm16200       | chr9:90221294-90221625    | 2.6191   | 2.3118   | -0.1801 | 0.517326 |
| Gm16976       | chr14:44858670-44974944   | 0.7165   | 0.6570   | -0.1251 | 0.639202 |
| Phf11d        | chr14:59347406-59365470   | 0.4992   | 0.5256   | 0.0745  | 0.819467 |
| Satb1         | chr17:51736186-51833290   | 66.3484  | 66.8592  | 0.0111  | 0.916466 |
| Ppp1r14b      | chr19:6975047-6977324     | 15.2367  | 14.5464  | -0.0669 | 0.596705 |
| Gtf3c3        | chr1:54397580-54438971    | 19.4849  | 18.7834  | -0.0529 | 0.581906 |
| Gm22489       | chr1:161035849-161035911  | 138.2425 | 130.4258 | -0.0840 | 0.660622 |
| Mir29c        | chr1:195037546-195037634  | 9.0146   | 7.9186   | -0.1870 | 0.657565 |
| Galnt1        | chr18:24205343-24286818   | 32.5745  | 31.5637  | -0.0455 | 0.480405 |
| Card9         | chr2:26352175-26360918    | 2.8738   | 2.7048   | -0.0875 | 0.714291 |
| Gm13461       | chr2:41987472-41988829    | 3.7590   | 3.9542   | 0.0731  | 0.794747 |
| Mettl8        | chr2:70964560-71055583    | 5.0869   | 5.1758   | 0.0250  | 0.841659 |
| Gm14176       | chr2:157901468-157902522  | 0.9287   | 0.8320   | -0.1587 | 0.563630 |
| Ptplad2       | chr4:88396143-88438928    | 2.1424   | 2.1903   | 0.0319  | 0.839937 |
| Eri3          | chr4:117550364-117674297  | 9.7494   | 9.4081   | -0.0514 | 0.466333 |
| Ppie          | chr4:123127114-123139951  | 22.7871  | 23.0582  | 0.0171  | 0.878204 |
| Shprh         | chr10:11149426-11217595   | 12.9947  | 12.6028  | -0.0442 | 0.543082 |
| Ahi1          | chr10:20952546-21080428   | 6.1019   | 6.1360   | 0.0080  | 0.836648 |
| Atg5          | chr10:44268357-44364291   | 19.1861  | 19.4187  | 0.0174  | 0.875845 |
| Ccdc138       | chr10:58497969-58576242   | 1.9370   | 1.8228   | -0.0877 | 0.606947 |
| Sgpl1         | chr10:61098641-61147703   | 15.5996  | 15.6689  | 0.0064  | 0.927558 |
| Lrrc20        | chr10:61475832-61582226   | 3.0453   | 3.1480   | 0.0479  | 0.811693 |
| Itgb2         | chr10:77530251-77565708   | 156.3507 | 156.6916 | 0.0031  | 0.967019 |
| E130317F20Rik | chr10:79851380-79854956   | 4.0775   | 4.1570   | 0.0278  | 0.851036 |
| Hsp90b1       | chr10:86690208-86705509   | 103.3456 | 104.1409 | 0.0111  | 0.917519 |
| Metap2        | chr10:93858488-93897093   | 10.2461  | 10.2772  | 0.0044  | 0.918802 |
| Mettl25       | chr10:105763188-105841380 | 5.9299   | 5.9970   | 0.0162  | 0.864794 |
| Slc26a10      | chr10:127172425-127180645 | 4.6433   | 4.7271   | 0.0258  | 0.816031 |
| Ascc2         | chr11:4637746-4685699     | 10.0383  | 10.0828  | 0.0064  | 0.913796 |
| B3gnt2        | chr11:22834746-22860961   | 38.1280  | 38.2603  | 0.0050  | 0.945763 |
| Tcf7          | chr11:52252370-52283014   | 179.8942 | 180.8758 | 0.0079  | 0.934620 |
| Tnip1         | chr11:54910784-54962917   | 24.4206  | 23.4313  | -0.0597 | 0.705213 |
| Gm10434       | chr11:59208245-59208720   | 10.5452  | 9.8470   | -0.0988 | 0.725422 |
| Arrb2         | chr11:70432634-70440828   | 80.0544  | 77.7763  | -0.0416 | 0.436475 |
| Gm6733        | chr11:72833460-72835380   | 1.1132   | 1.0198   | -0.1264 | 0.712251 |
| 1200014J11Rik | chr11:73047782-73080217   | 12.0618  | 12.1037  | 0.0050  | 0.908206 |
| Gm11423       | chr11:82779600-82781042   | 8.3126   | 8.5136   | 0.0345  | 0.776673 |
| Nt5c3b        | chr11:100422320-100441808 | 19.8137  | 19.9816  | 0.0122  | 0.893685 |
| Coasy         | chr11:101082564-101086619 | 9.8085   | 9.4683   | -0.0509 | 0.384734 |
| Ezh1          | chr11:101191114-101226463 | 17.7828  | 17.2486  | -0.0440 | 0.488658 |
| Becn1         | chr11:101285951-101302286 | 26.8036  | 26.8634  | 0.0032  | 0.940347 |
| Tex2          | chr11:106502146-106613423 | 10.2927  | 10.4168  | 0.0173  | 0.900290 |
| Ddx5          | chr11:106780354-106789185 | 313.6756 | 305.0525 | -0.0402 | 0.366480 |
| Acox1         | chr11:116171887-116199045 | 8.0069   | 8.0644   | 0.0103  | 0.869362 |
| Did           | chr12:31331563-31351437   | 30.9866  | 31.1721  | 0.0086  | 0.912522 |
| Prkar2b       | chr12:31958475-32061296   | 1.3516   | 1.4002   | 0.0509  | 0.832970 |
| Hectd1        | chr12:51743721-51829536   | 95.7311  | 92.8963  | -0.0434 | 0.474598 |

|                      |                           |          |          |         |          |
|----------------------|---------------------------|----------|----------|---------|----------|
| <i>Klhl28</i>        | chr12:64942439-64965536   | 18.7365  | 18.0626  | -0.0529 | 0.628151 |
| <i>Gm17191</i>       | chr12:81532034-81533358   | 2.1006   | 2.2997   | 0.1307  | 0.754913 |
| <i>Map3k9</i>        | chr12:81714949-81781170   | 0.5473   | 0.5076   | -0.1088 | 0.779371 |
| <i>Psen1</i>         | chr12:83688202-83735199   | 26.1763  | 26.2810  | 0.0058  | 0.930733 |
| <i>Cmah</i>          | chr13:24327419-24477285   | 62.2703  | 60.1771  | -0.0493 | 0.659464 |
| <i>2610307P16Rik</i> | chr13:28460033-28885620   | 0.2569   | 0.2849   | 0.1491  | 0.760671 |
| <i>Nsd1</i>          | chr13:55209781-55318325   | 49.5154  | 47.9799  | -0.0454 | 0.606648 |
| <i>Rmi1</i>          | chr13:58402596-58411149   | 3.0220   | 2.8861   | -0.0664 | 0.485635 |
| <i>4930486L24Rik</i> | chr13:60842620-60864416   | 4.0077   | 3.7599   | -0.0921 | 0.655505 |
| <i>Zcchc9</i>        | chr13:91796532-91807705   | 16.3087  | 15.8368  | -0.0424 | 0.004647 |
| <i>Zfyve16</i>       | chr13:92487107-92530868   | 8.0522   | 7.7634   | -0.0527 | 0.621186 |
| <i>Akap9</i>         | chr5:3928053-4080209      | 19.8641  | 19.2896  | -0.0423 | 0.485711 |
| <i>Gpr125</i>        | chr5:49959950-50058996    | 0.3548   | 0.3237   | -0.1322 | 0.499487 |
| <i>Rpl9</i>          | chr5:65388363-65391443    | 14.9930  | 14.4857  | -0.0497 | 0.483061 |
| <i>Gm15787</i>       | chr5:110154399-110176504  | 7.0389   | 7.1502   | 0.0226  | 0.865362 |
| <i>Atp2a2</i>        | chr5:122442701-122502225  | 26.4128  | 25.5849  | -0.0459 | 0.577072 |
| <i>NA</i>            | chr5:134176357-134176956  | 1.5888   | 1.7136   | 0.1090  | 0.578336 |
| <i>Fis1</i>          | chr5:136953274-136966234  | 47.0453  | 47.7190  | 0.0205  | 0.893444 |
| <i>Tnrc18</i>        | chr5:142750379-142817662  | 5.2148   | 4.9754   | -0.0678 | 0.735653 |
| <i>Glcc1</i>         | chr6:8509599-8597548      | 6.0815   | 5.8511   | -0.0557 | 0.702149 |
| <i>Irf5</i>          | chr6:29526624-29541869    | 7.4092   | 7.4951   | 0.0166  | 0.801309 |
| <i>Gcfc2</i>         | chr6:81923668-81959915    | 5.7651   | 5.8179   | 0.0132  | 0.887176 |
| <i>Gfpt1</i>         | chr6:87042845-87092197    | 9.3802   | 9.4140   | 0.0052  | 0.935917 |
| <i>Emc3</i>          | chr6:113514873-113531638  | 28.6735  | 28.8078  | 0.0067  | 0.916695 |
| <i>Ttyh1</i>         | chr7:4119407-4136706      | 0.5072   | 0.4686   | -0.1141 | 0.750021 |
| <i>U2af2</i>         | chr7:5062142-5079945      | 52.8124  | 53.0827  | 0.0074  | 0.922642 |
| <i>Rab4b</i>         | chr7:27168423-27178896    | 17.5338  | 17.7176  | 0.0150  | 0.894379 |
| <i>Zfp74</i>         | chr7:29930814-29954089    | 3.7098   | 3.5684   | -0.0561 | 0.470664 |
| <i>Gm24757</i>       | chr7:30311524-30311895    | 7.3244   | 6.7947   | -0.1083 | 0.562050 |
| <i>Zfp507</i>        | chr7:35772345-35802989    | 14.4003  | 13.9287  | -0.0480 | 0.520073 |
| <i>Fcgrt</i>         | chr7:45092992-45103822    | 18.1543  | 17.4005  | -0.0612 | 0.675778 |
| <i>Crtc3</i>         | chr7:80586626-80688877    | 5.1347   | 5.2347   | 0.0278  | 0.885577 |
| <i>Ucp2</i>          | chr7:100493336-100502020  | 33.1892  | 32.1259  | -0.0470 | 0.633143 |
| <i>Fam160a2</i>      | chr7:105371210-105373718  | 1.9609   | 2.0263   | 0.0473  | 0.795769 |
| <i>Dennd5a</i>       | chr7:109893779-109960470  | 3.0967   | 2.9757   | -0.0575 | 0.597013 |
| <i>Swap70</i>        | chr7:110221702-110283503  | 1.9040   | 1.9498   | 0.0343  | 0.843809 |
| <i>Gm15503</i>       | chr7:128410419-128412341  | 4.1739   | 3.8699   | -0.1091 | 0.489542 |
| <i>Tacc2</i>         | chr7:130577483-130764784  | 0.6702   | 0.6339   | -0.0802 | 0.683465 |
| <i>Dhx32</i>         | chr7:133720941-133782726  | 7.1545   | 7.2231   | 0.0138  | 0.878939 |
| <i>Pidd1</i>         | chr7:141438112-141444025  | 1.7100   | 1.6202   | -0.0778 | 0.683380 |
| <i>4933416M07Rik</i> | chr8:27142909-27149671    | 4.7952   | 4.5713   | -0.0690 | 0.465152 |
| <i>Rpgrip1l</i>      | chr8:91217029-91313262    | 0.8108   | 0.7687   | -0.0770 | 0.612360 |
| <i>Tk2</i>           | chr8:104226690-104248558  | 30.4235  | 30.6604  | 0.0112  | 0.915243 |
| <i>Gm15898</i>       | chr8:120095059-120097736  | 2.6200   | 2.3977   | -0.1279 | 0.570205 |
| <i>Gins2</i>         | chr8:120578632-120589304  | 5.4619   | 5.2218   | -0.0649 | 0.703263 |
| <i>Rnf166</i>        | chr8:122466146-122476064  | 42.0101  | 42.2684  | 0.0088  | 0.900804 |
| <i>Map10</i>         | chr8:125669817-125673365  | 2.0269   | 2.0883   | 0.0431  | 0.823641 |
| <i>Pin1</i>          | chr9:20652129-20666584    | 8.7333   | 8.4392   | -0.0494 | 0.414488 |
| <i>Icam5</i>         | chr9:21032037-21039036    | 0.3644   | 0.3264   | -0.1591 | 0.762316 |
| <i>Mpi</i>           | chr9:57544255-57552763    | 4.2095   | 4.2855   | 0.0258  | 0.820936 |
| <i>2300009A05Rik</i> | chr9:63394446-63399244    | 19.2802  | 19.8796  | 0.0442  | 0.858987 |
| <i>Mto1</i>          | chr9:78448207-78475348    | 11.0012  | 11.0817  | 0.0105  | 0.894925 |
| <i>Rwdd2a</i>        | chr9:86572052-86574896    | 1.6127   | 1.6970   | 0.0735  | 0.622052 |
| <i>P4htm</i>         | chr9:108578825-108597600  | 2.2928   | 2.3752   | 0.0509  | 0.824643 |
| <i>Ip6k2</i>         | chr9:108795993-108806333  | 18.1664  | 17.5589  | -0.0491 | 0.329602 |
| <i>Tgm4</i>          | chr9:123034738-123067561  | 1.5902   | 1.5096   | -0.0750 | 0.557375 |
| <i>Rpgr</i>          | chrX:10073620-10216920    | 1.0376   | 1.0653   | 0.0380  | 0.843736 |
| <i>Gm9085</i>        | chrX:20382749-20383821    | 0.6473   | 0.7252   | 0.1639  | 0.761582 |
| <i>Gria3</i>         | chrX:41400853-41678601    | 1.6161   | 1.6573   | 0.0364  | 0.850065 |
| <i>Zfp449</i>        | chrX:56346399-56365674    | 0.3651   | 0.3218   | -0.1823 | 0.737200 |
| <i>Cox7b</i>         | chrX:106015699-106022450  | 66.1104  | 63.0055  | -0.0694 | 0.744901 |
| <i>Apex2</i>         | chrX:150519518-150589868  | 2.4261   | 2.3213   | -0.0638 | 0.689349 |
| <i>Mir3113</i>       | chrX:151859561-151859637  | 13.4466  | 12.0816  | -0.1544 | 0.495901 |
| <i>Dnajc21</i>       | chr15:10446755-10470516   | 9.4211   | 9.4651   | 0.0067  | 0.858638 |
| <i>Stk3</i>          | chr15:34875495-35155806   | 2.2180   | 2.2780   | 0.0385  | 0.839564 |
| <i>Taf2</i>          | chr15:55015128-55072152   | 22.0416  | 21.3752  | -0.0443 | 0.458722 |
| <i>Ccdc134</i>       | chr15:82127921-82142200   | 14.9701  | 14.3744  | -0.0586 | 0.616090 |
| <i>Naga</i>          | chr15:82329531-82338826   | 12.5522  | 12.7264  | 0.0199  | 0.884233 |
| <i>Bin2</i>          | chr15:100641076-100669553 | 205.5342 | 199.2814 | -0.0446 | 0.554360 |
| <i>Mfsd5</i>         | chr15:102279455-102281744 | 16.2922  | 16.4118  | 0.0106  | 0.777217 |
| <i>Kctd6</i>         | chr14:8214147-8223567     | 3.6269   | 3.6994   | 0.0286  | 0.807766 |

|                      |                          |          |          |         |          |
|----------------------|--------------------------|----------|----------|---------|----------|
| <i>Trav17</i>        | chr14:53806524-53807113  | 3.7673   | 3.4691   | -0.1190 | 0.603670 |
| <i>Micu2</i>         | chr14:57916279-57999262  | 35.7843  | 35.8503  | 0.0027  | 0.956342 |
| <i>Esd</i>           | chr14:74732296-74750765  | 18.1933  | 17.5142  | -0.0549 | 0.626145 |
| <i>Igf2r</i>         | chr17:12682405-12769664  | 36.3462  | 36.6203  | 0.0108  | 0.927325 |
| <i>Gm26873</i>       | chr17:17389942-17395303  | 6.4079   | 6.1505   | -0.0591 | 0.444526 |
| <i>Zfp53</i>         | chr17:21491255-21509764  | 42.6229  | 41.2294  | -0.0480 | 0.532329 |
| <i>Wdr24</i>         | chr17:25823626-25828730  | 16.4971  | 15.9188  | -0.0515 | 0.607116 |
| <i>Hba-ps4</i>       | chr17:26286362-26287061  | 2.7203   | 2.9299   | 0.1070  | 0.748710 |
| <i>Bnip1</i>         | chr17:26781078-26792565  | 4.7559   | 4.8114   | 0.0167  | 0.889319 |
| <i>Zfp955b</i>       | chr17:33289648-33303196  | 7.1794   | 6.8402   | -0.0698 | 0.654108 |
| <i>Vars2</i>         | chr17:35655633-35667592  | 9.3395   | 8.9901   | -0.0550 | 0.650323 |
| <i>H2-T10</i>        | chr17:36115875-36121465  | 12.6316  | 12.2335  | -0.0462 | 0.373912 |
| <i>AY036118</i>      | chr17:39848102-39848827  | 597.5402 | 630.5397 | 0.0776  | 0.822638 |
| <i>Gm16276</i>       | chr17:56014282-56014544  | 4.8373   | 5.1973   | 0.1036  | 0.717750 |
| <i>Tnfsf14</i>       | chr17:57189491-57194189  | 6.0222   | 5.6880   | -0.0824 | 0.729222 |
| <i>Slc30a6</i>       | chr17:74395607-74424229  | 8.9647   | 8.5709   | -0.0648 | 0.632118 |
| <i>Gm17315</i>       | chr17:79354698-79358022  | 1.1221   | 1.0431   | -0.1054 | 0.619312 |
| <i>Atp13a3</i>       | chr16:30312422-30388837  | 21.1770  | 20.4630  | -0.0495 | 0.635218 |
| <i>Gm15518</i>       | chr16:49758575-49798870  | 1.2217   | 1.2813   | 0.0687  | 0.814054 |
| <i>Kcnj15</i>        | chr16:95257557-95300260  | 0.1389   | 0.1495   | 0.1055  | 0.741583 |
| <i>Ankrd13d</i>      | chr19:4270179-4283137    | 4.1586   | 3.9799   | -0.0634 | 0.433308 |
| <i>Rtn3</i>          | chr19:7425900-7483289    | 13.1216  | 13.2669  | 0.0159  | 0.910127 |
| <i>Atf3</i>          | chr19:7494039-7538608    | 17.0661  | 16.5119  | -0.0476 | 0.609432 |
| <i>Pla2g16</i>       | chr19:7557458-7588545    | 9.6006   | 9.2520   | -0.0534 | 0.642222 |
| <i>Dtx4</i>          | chr19:12466340-12501996  | 3.2601   | 3.3003   | 0.0177  | 0.888225 |
| <i>Rfk</i>           | chr19:17394042-17401349  | 12.6120  | 12.8177  | 0.0233  | 0.867582 |
| <i>Nmrk1</i>         | chr19:18631949-18652194  | 4.0416   | 3.8464   | -0.0714 | 0.691657 |
| <i>Cstf2t</i>        | chr19:31082840-31086590  | 34.3728  | 34.5315  | 0.0066  | 0.925722 |
| <i>Pf1e1</i>         | chr19:38481108-38785030  | 0.3507   | 0.3281   | -0.0959 | 0.680977 |
| <i>Xpnpep1</i>       | chr19:52943416-53040214  | 5.6499   | 5.4705   | -0.0465 | 0.290876 |
| <i>Rb1cc1</i>        | chr1:6206196-6276648     | 16.5232  | 16.6068  | 0.0073  | 0.921939 |
| <i>1700034P13Rik</i> | chr1:9747647-9791922     | 5.7787   | 5.5313   | -0.0631 | 0.572593 |
| <i>Ly96</i>          | chr1:16688455-16709605   | 1.7222   | 1.5465   | -0.1552 | 0.655704 |
| <i>B3gat2</i>        | chr1:23761752-23849158   | 5.5995   | 5.6663   | 0.0171  | 0.883219 |
| <i>Hibch</i>         | chr1:52845012-52920986   | 12.1954  | 11.7104  | -0.0586 | 0.602319 |
| <i>Mpp4</i>          | chr1:59120935-59163389   | 0.7493   | 0.6926   | -0.1136 | 0.619968 |
| <i>Ino80d</i>        | chr1:62958417-63114667   | 9.4650   | 9.6401   | 0.0265  | 0.893619 |
| <i>Hdac4</i>         | chr1:91932756-92148393   | 17.9858  | 18.2826  | 0.0236  | 0.891381 |
| <i>Ndufa10</i>       | chr1:92439009-92473860   | 55.9784  | 56.3168  | 0.0087  | 0.917415 |
| <i>Gorab</i>         | chr1:163384908-163403641 | 5.7037   | 5.4420   | -0.0678 | 0.634200 |
| <i>Tmco1</i>         | chr1:167308669-167333978 | 9.2622   | 8.8680   | -0.0627 | 0.687194 |
| <i>Hsd17b7</i>       | chr1:169949534-169969241 | 2.9938   | 3.0597   | 0.0314  | 0.855420 |
| <i>Angel2</i>        | chr1:190925111-190946962 | 21.8721  | 21.2432  | -0.0421 | 0.374542 |
| <i>Gm15872</i>       | chr1:193187374-193192011 | 14.5182  | 14.8779  | 0.0353  | 0.859153 |
| <i>Tmem241</i>       | chr18:11981302-12121480  | 6.2606   | 6.3203   | 0.0137  | 0.823155 |
| <i>Brd8</i>          | chr18:34598614-34624601  | 16.1763  | 16.2076  | 0.0028  | 0.957498 |
| <i>Nrg2</i>          | chr18:36017706-36197380  | 0.6500   | 0.6835   | 0.0725  | 0.707455 |
| <i>Mcc</i>           | chr18:44425060-44812182  | 0.2988   | 0.3166   | 0.0835  | 0.777097 |
| <i>Csnk1a1</i>       | chr18:61555273-61590061  | 50.4382  | 48.9799  | -0.0423 | 0.500944 |
| <i>Gm10524</i>       | chr18:82692948-82706174  | 2.5291   | 2.6215   | 0.0518  | 0.847198 |
| <i>Tmx3</i>          | chr18:90510153-90543267  | 28.5093  | 28.7736  | 0.0133  | 0.901455 |
| <i>Kin</i>           | chr2:10080592-10092806   | 23.4264  | 23.6084  | 0.0112  | 0.854205 |
| <i>Neb1</i>          | chr2:17343908-17731464   | 0.2259   | 0.2086   | -0.1149 | 0.731922 |
| <i>Phpt1</i>         | chr2:25573429-25575224   | 12.3366  | 12.6458  | 0.0357  | 0.860987 |
| <i>Rexo4</i>         | chr2:26953562-26964386   | 25.9374  | 26.0202  | 0.0046  | 0.915113 |
| <i>Gm13547</i>       | chr2:29759311-29768998   | 0.2448   | 0.2672   | 0.1263  | 0.698694 |
| <i>Pthr1</i>         | chr2:32775785-32777597   | 1.6346   | 1.5046   | -0.1195 | 0.593862 |
| <i>Gm13443</i>       | chr2:35340360-35341316   | 1.3814   | 1.4712   | 0.0909  | 0.677581 |
| <i>Tll11</i>         | chr2:35751240-35979913   | 0.2306   | 0.2023   | -0.1887 | 0.737443 |
| <i>Itga6</i>         | chr2:71745615-71858416   | 21.3187  | 21.4175  | 0.0067  | 0.928634 |
| <i>Lpcat4</i>        | chr2:112239467-112247111 | 8.8679   | 8.5183   | -0.0580 | 0.649818 |
| <i>Capn3</i>         | chr2:120456018-120504913 | 1.9037   | 1.8120   | -0.0712 | 0.588783 |
| <i>Pdia3</i>         | chr2:121413774-121438687 | 75.4021  | 75.9800  | 0.0110  | 0.924309 |
| <i>Ast1</i>          | chr2:127338638-127357651 | 0.6131   | 0.5559   | -0.1414 | 0.659849 |
| <i>Myh7b</i>         | chr2:155611211-155634307 | 0.5685   | 0.5331   | -0.0927 | 0.683826 |
| <i>Cnbd2</i>         | chr2:156312298-156375638 | 4.8928   | 4.6541   | -0.0722 | 0.700929 |
| <i>5031434O11Rik</i> | chr3:51559756-51567117   | 3.5954   | 3.4483   | -0.0602 | 0.564913 |
| <i>Rplp0-ps1</i>     | chr3:93278140-93279073   | 1.1944   | 1.0648   | -0.1658 | 0.761936 |
| <i>Pdzk1</i>         | chr3:96829283-96870926   | 1.4500   | 1.5051   | 0.0538  | 0.839174 |
| <i>St7l</i>          | chr3:104864502-104926860 | 6.1711   | 6.2259   | 0.0128  | 0.859403 |
| <i>Amigo1</i>        | chr3:108186334-108192286 | 1.1259   | 1.1634   | 0.0472  | 0.818670 |

|                      |                           |            |            |         |          |
|----------------------|---------------------------|------------|------------|---------|----------|
| <i>Slc35a3</i>       | chr3:116669468-116712831  | 6.9098     | 6.6955     | -0.0454 | 0.443911 |
| <i>Plekhf2</i>       | chr4:10988661-11007927    | 14.0597    | 13.5871    | -0.0493 | 0.481675 |
| <i>Rmrp</i>          | chr4:43492787-43493058    | 12380.0601 | 12675.8924 | 0.0341  | 0.889255 |
| <i>Gm25687</i>       | chr4:54468332-54468611    | 18.9432    | 21.0179    | 0.1499  | 0.765579 |
| <i>Dennd4c</i>       | chr4:86748554-86850603    | 21.5012    | 20.7112    | -0.0540 | 0.676491 |
| <i>Ttc4</i>          | chr4:106662255-106678944  | 18.1077    | 18.2162    | 0.0086  | 0.903377 |
| <i>C530005A16Rik</i> | chr4:116589732-116597630  | 10.2392    | 9.8640     | -0.0539 | 0.543433 |
| <i>Ppp1r8</i>        | chr4:132826928-132843169  | 25.4732    | 25.6781    | 0.0116  | 0.902983 |
| <i>Stx12</i>         | chr4:132853500-132884509  | 11.9981    | 11.5680    | -0.0527 | 0.622945 |
| <i>Gm13248</i>       | chr4:146610960-146658160  | 1.9637     | 1.8194     | -0.1101 | 0.718153 |
| <i>Plod1</i>         | chr4:147909752-147936767  | 0.9578     | 0.9055     | -0.0811 | 0.603119 |
| <i>Tas1r3</i>        | chr4:155859267-155863362  | 2.6867     | 2.5704     | -0.0638 | 0.487162 |
| <i>Gm24507</i>       | chr13:90098980-90099114   | 5.7776     | 6.2777     | 0.1198  | 0.758318 |
| <i>C030010L15Rik</i> | chr16:97994600-97997419   | 1.3464     | 1.1814     | -0.1886 | 0.657804 |
| <i>Gm10912</i>       | chr2:104065825-104067486  | 0.4976     | 0.4233     | -0.2333 | 0.745269 |
| <i>Gm13940</i>       | chr2:112389196-112389497  | 3.5914     | 3.1721     | -0.1791 | 0.709809 |
| <i>NA</i>            | chr4:119733795-119736768  | 0.2458     | 0.2731     | 0.1520  | 0.750398 |
| <i>Gm11361</i>       | chr13:28257635-28258094   | 9.4905     | 9.9690     | 0.0710  | 0.820585 |
| <i>Atp6v1h</i>       | chr1:5083172-5162549      | 35.7046    | 34.4885    | -0.0500 | 0.605886 |
| <i>Gm17711</i>       | chr10:18011267-18011505   | 161.6093   | 154.8844   | -0.0613 | 0.705198 |
| <i>Fam26f</i>        | chr10:34126068-34127972   | 14.1055    | 13.4385    | -0.0699 | 0.682957 |
| <i>Thap2</i>         | chr10:115369965-115384435 | 6.9318     | 6.6587     | -0.0580 | 0.677291 |
| <i>Irgm1</i>         | chr11:48861967-48871683   | 35.8279    | 34.3466    | -0.0609 | 0.729886 |
| <i>Gpx3</i>          | chr11:54902452-54910377   | 1.8478     | 1.7372     | -0.0891 | 0.659898 |
| <i>Rap1gap2</i>      | chr11:74383355-74590186   | 5.4349     | 5.1659     | -0.0732 | 0.768594 |
| <i>Sept4</i>         | chr11:87568902-87590539   | 0.9692     | 0.9057     | -0.0979 | 0.559584 |
| <i>Kat7</i>          | chr11:95274258-95310246   | 23.3875    | 23.4047    | 0.0011  | 0.976186 |
| <i>Spop</i>          | chr11:95414079-95493406   | 18.7732    | 18.1823    | -0.0461 | 0.477120 |
| <i>Psm3</i>          | chr11:97703398-97713500   | 15.5019    | 14.9028    | -0.0569 | 0.634112 |
| <i>Anapc11</i>       | chr11:120598420-120608198 | 6.5508     | 6.3230     | -0.0511 | 0.545871 |
| <i>Asap2</i>         | chr12:21111747-21270171   | 2.6538     | 2.5282     | -0.0700 | 0.732596 |
| <i>Gm26517</i>       | chr12:51888014-51889459   | 15.7235    | 15.0376    | -0.0644 | 0.664887 |
| <i>Gm2800</i>        | chr12:107183554-107186734 | 2.8848     | 3.0641     | 0.0870  | 0.759445 |
| <i>Mboat1</i>        | chr13:30136497-30246717   | 9.7879     | 9.3528     | -0.0656 | 0.716495 |
| <i>Cast</i>          | chr13:74694285-74807921   | 76.6944    | 76.7716    | 0.0015  | 0.977523 |
| <i>Gjm2</i>          | chr13:97137936-97181195   | 11.2884    | 10.9482    | -0.0441 | 0.512654 |
| <i>Gm17509</i>       | chr13:117218700-117221075 | 18.7728    | 17.9416    | -0.0653 | 0.719512 |
| <i>Gm15610</i>       | chr5:8971947-8972142      | 4.5059     | 4.9366     | 0.1317  | 0.815558 |
| <i>Cdk5</i>          | chr5:24418249-24423530    | 14.6634    | 14.1826    | -0.0481 | 0.334686 |
| <i>Nipal1</i>        | chr5:72647795-72671078    | 7.7392     | 7.7994     | 0.0112  | 0.887476 |
| <i>C530008M17Rik</i> | chr5:76657682-76873554    | 0.5027     | 0.4689     | -0.1004 | 0.740376 |
| <i>Gm9958</i>        | chr5:90367203-90368487    | 5.2161     | 5.3439     | 0.0349  | 0.819909 |
| <i>Hnrnpd</i>        | chr5:99958425-99978938    | 17.1003    | 17.2393    | 0.0117  | 0.915020 |
| <i>Klh8</i>          | chr5:103861972-103911259  | 2.2577     | 2.1428     | -0.0753 | 0.686920 |
| <i>Zfp951</i>        | chr5:104814342-104828957  | 5.3900     | 5.0099     | -0.1055 | 0.795499 |
| <i>Gak</i>           | chr5:108569410-108629739  | 42.9461    | 41.6950    | -0.0427 | 0.570989 |
| <i>Mvk</i>           | chr5:114444268-114460591  | 3.3526     | 3.1872     | -0.0730 | 0.655461 |
| <i>Cux1</i>          | chr5:136248134-136567490  | 7.2256     | 7.2585     | 0.0066  | 0.931260 |
| <i>NA</i>            | chr5:136345883-136350231  | 0.9325     | 0.8766     | -0.0893 | 0.708306 |
| <i>Cul1</i>          | chr6:47453397-47526139    | 34.1730    | 34.2428    | 0.0029  | 0.955388 |
| <i>B230319C09Rik</i> | chr6:83441754-83448322    | 3.1184     | 3.2321     | 0.0517  | 0.868913 |
| <i>Csgalnact2</i>    | chr6:118107451-118139140  | 6.8001     | 6.8869     | 0.0183  | 0.887316 |
| <i>Lpar5</i>         | chr6:125067919-125082472  | 3.7954     | 3.9251     | 0.0485  | 0.847930 |
| <i>Cd3eap</i>        | chr7:19356848-19359483    | 13.3416    | 12.7305    | -0.0676 | 0.712284 |
| <i>Zfp526</i>        | chr7:25221450-25227507    | 12.0894    | 11.6953    | -0.0478 | 0.561298 |
| <i>Cyp2t4</i>        | chr7:27153713-27158668    | 1.3746     | 1.4399     | 0.0670  | 0.669804 |
| <i>Supt5</i>         | chr7:28314897-28338719    | 57.1493    | 55.2926    | -0.0476 | 0.626688 |
| <i>Taf10</i>         | chr7:105739392-105744361  | 37.8585    | 36.7674    | -0.0422 | 0.445715 |
| <i>Mak16</i>         | chr8:31159467-31168724    | 85.9378    | 86.2283    | 0.0049  | 0.940439 |
| <i>Acs1</i>          | chr8:46471040-46536051    | 1.3854     | 1.4096     | 0.0250  | 0.853644 |
| <i>Cmtm3</i>         | chr8:104340593-104347672  | 2.8066     | 2.8978     | 0.0461  | 0.791187 |
| <i>Sdr42e1</i>       | chr8:117661398-117673689  | 2.1253     | 2.0195     | -0.0736 | 0.544248 |
| <i>Zfp846</i>        | chr9:20581324-20595194    | 6.6367     | 6.3985     | -0.0527 | 0.454243 |
| <i>1700084C06Rik</i> | chr9:21091754-21128393    | 13.0682    | 13.2796    | 0.0231  | 0.760194 |
| <i>Acsbg1</i>        | chr9:54604876-54661870    | 8.1215     | 8.2351     | 0.0201  | 0.897118 |
| <i>Gata1</i>         | chrX:7959259-7978071      | 1.3205     | 1.3724     | 0.0556  | 0.734666 |
| <i>Ocr1</i>          | chrX:47912386-47965868    | 1.4161     | 1.4477     | 0.0319  | 0.861062 |
| <i>Hprt</i>          | chrX:52988136-53021659    | 64.3201    | 62.0068    | -0.0528 | 0.646625 |
| <i>Dkc1</i>          | chrX:75095853-75109777    | 39.8552    | 40.0226    | 0.0060  | 0.929518 |
| <i>Gm20489</i>       | chrX:101261404-101269023  | 154.2709   | 154.9848   | 0.0067  | 0.942190 |
| <i>Morf4l2</i>       | chrX:136732941-136743690  | 12.2472    | 12.4057    | 0.0185  | 0.892146 |

|                      |                           |           |           |         |          |
|----------------------|---------------------------|-----------|-----------|---------|----------|
| <i>Fam134b</i>       | chr15:25843263-25973687   | 34.7568   | 33.4874   | -0.0537 | 0.689275 |
| <i>Zfp623</i>        | chr15:75940951-75949377   | 6.7849    | 6.5350    | -0.0541 | 0.449205 |
| <i>Cyhr1</i>         | chr15:76643394-76660117   | 12.4539   | 12.0526   | -0.0472 | 0.546160 |
| <i>Myh9</i>          | chr15:77760586-77842175   | 277.1284  | 268.8540  | -0.0437 | 0.585111 |
| <i>Gm22077</i>       | chr15:80080250-80080343   | 35.5447   | 32.7852   | -0.1166 | 0.731553 |
| <i>Rpp14</i>         | chr14:8080366-8091834     | 13.5596   | 13.6472   | 0.0093  | 0.902723 |
| <i>Samd8</i>         | chr14:21750530-21798725   | 4.1424    | 4.0009    | -0.0502 | 0.536553 |
| <i>Zcchc24</i>       | chr14:25711639-25768856   | 0.7580    | 0.7081    | -0.0982 | 0.703858 |
| <i>Gnl3</i>          | chr14:31012433-31019089   | 67.3784   | 64.9244   | -0.0535 | 0.671359 |
| <i>Snord19</i>       | chr14:31016205-31016281   | 43.5187   | 40.1736   | -0.1154 | 0.727895 |
| <i>Traj28</i>        | chr14:54191660-54191725   | 71.4527   | 66.8489   | -0.0961 | 0.701596 |
| <i>Pspc1</i>         | chr14:56722440-56778316   | 16.0755   | 16.1398   | 0.0058  | 0.930701 |
| <i>4931440J10Rik</i> | chr14:62760500-62830126   | 2.8277    | 2.6318    | -0.1036 | 0.572603 |
| <i>Snora20</i>       | chr17:12922789-12922917   | 11.2525   | 10.2747   | -0.1311 | 0.651223 |
| <i>Pacsin1</i>       | chr17:27655508-27711106   | 9.1861    | 8.7758    | -0.0659 | 0.721043 |
| <i>Zfp119b</i>       | chr17:55938552-55945174   | 2.5642    | 2.3924    | -0.1001 | 0.671531 |
| <i>Kdm4b</i>         | chr17:56326061-56402870   | 16.9761   | 16.4781   | -0.0430 | 0.507053 |
| <i>Birc6</i>         | chr17:74528294-74703773   | 42.4389   | 41.1456   | -0.0447 | 0.605592 |
| <i>Gm16892</i>       | chr16:57167400-57174413   | 3.9436    | 3.7388    | -0.0769 | 0.625067 |
| <i>Psmg1</i>         | chr16:95979932-95990960   | 17.0657   | 17.3375   | 0.0228  | 0.885758 |
| <i>Gm25822</i>       | chr19:8888537-8888685     | 21.5552   | 22.2518   | 0.0459  | 0.754632 |
| <i>Vti1a</i>         | chr19:55316350-55626561   | 12.0449   | 11.6246   | -0.0512 | 0.651253 |
| <i>Mfsd9</i>         | chr1:40772037-40790687    | 0.7173    | 0.7457    | 0.0559  | 0.827700 |
| <i>8430432A02Rik</i> | chr1:43092587-43093835    | 1.2941    | 1.1725    | -0.1424 | 0.646549 |
| <i>Nbeal1</i>        | chr1:60180598-60338328    | 6.4187    | 6.1947    | -0.0513 | 0.686707 |
| <i>Nhej1</i>         | chr1:74967138-75046639    | 5.2391    | 4.9653    | -0.0775 | 0.598478 |
| <i>NA</i>            | chr1:87796466-87796817    | 3.6431    | 3.8666    | 0.0859  | 0.716058 |
| <i>Ube2t</i>         | chr1:134962564-134974162  | 4.2825    | 4.4000    | 0.0390  | 0.853098 |
| <i>Klhdc9</i>        | chr1:171358445-171360798  | 1.5178    | 1.3954    | -0.1213 | 0.742820 |
| <i>Gm26407</i>       | chr18:12961498-12961805   | 2.6144    | 2.3324    | -0.1647 | 0.524491 |
| <i>Snora74a</i>      | chr18:35557031-35557227   | 1087.7541 | 1135.6596 | 0.0622  | 0.839516 |
| <i>Eij4ebp3</i>      | chr18:36664059-36665917   | 19.8119   | 20.0624   | 0.0181  | 0.867105 |
| <i>Gm23205</i>       | chr18:38297938-38298041   | 8.3112    | 7.4389    | -0.1600 | 0.737691 |
| <i>Wdr7</i>          | chr18:63708694-63989760   | 9.9717    | 9.6642    | -0.0452 | 0.551063 |
| <i>Slc2a6</i>        | chr2:27021362-27027998    | 0.7035    | 0.6484    | -0.1178 | 0.715732 |
| <i>Lrsam1</i>        | chr2:32925215-32961614    | 2.2247    | 2.2658    | 0.0264  | 0.863730 |
| <i>Gm13477</i>       | chr2:44788264-44790951    | 1.5802    | 1.6511    | 0.0633  | 0.842268 |
| <i>Rapgef4</i>       | chr2:71981239-72257474    | 20.0278   | 20.1057   | 0.0056  | 0.943036 |
| <i>E030042O20Rik</i> | chr2:75704769-75710024    | 2.6826    | 2.5208    | -0.0898 | 0.637902 |
| <i>Nup160</i>        | chr2:90677214-90736328    | 8.5007    | 8.2341    | -0.0460 | 0.574818 |
| <i>Stard9</i>        | chr2:120629125-120731897  | 1.1814    | 1.1393    | -0.0524 | 0.508891 |
| <i>1500011K16Rik</i> | chr2:127791387-127792488  | 12.6616   | 12.9594   | 0.0335  | 0.854582 |
| <i>Gm26681</i>       | chr2:150748280-150750762  | 2.0676    | 1.9341    | -0.0963 | 0.392406 |
| <i>Abhd12</i>        | chr2:150832492-150904741  | 16.3642   | 15.8568   | -0.0454 | 0.454568 |
| <i>Uckl1os</i>       | chr2:181578479-181585170  | 10.2507   | 9.8270    | -0.0609 | 0.690819 |
| <i>Prkab2</i>        | chr3:97658192-97673812    | 3.0131    | 3.0665    | 0.0253  | 0.861708 |
| <i>Gm26530</i>       | chr3:116488965-116493358  | 3.6012    | 3.6573    | 0.0223  | 0.836512 |
| <i>Dnajb4</i>        | chr3:152178510-152210279  | 5.8296    | 5.9429    | 0.0278  | 0.866181 |
| <i>Chchd7</i>        | chr4:3938887-3951046      | 5.8099    | 5.8632    | 0.0132  | 0.876203 |
| <i>Gm26663</i>       | chr4:11321943-11342953    | 0.4979    | 0.4365    | -0.1900 | 0.727563 |
| <i>Ago1</i>          | chr4:126435011-126468583  | 10.0301   | 9.7035    | -0.0478 | 0.646322 |
| <i>Gm12992</i>       | chr4:131899477-131920029  | 7.0316    | 6.7520    | -0.0585 | 0.710581 |
| <i>Gm13205</i>       | chr4:148947491-148948914  | 2.4131    | 2.5765    | 0.0945  | 0.656406 |
| <i>Aurkaip1</i>      | chr4:155831271-155833130  | 34.6582   | 35.1038   | 0.0184  | 0.897066 |
| <i>Gm13834</i>       | chr6:31087608-31087912    | 5.6133    | 4.8327    | -0.2160 | 0.747060 |
| <i>Gm25596</i>       | chr10:29349584-29349691   | 18.6059   | 19.5215   | 0.0693  | 0.697887 |
| <i>Gm26564</i>       | chr10:34295911-34298907   | 12.4889   | 12.5639   | 0.0086  | 0.917366 |
| <i>Cd24a</i>         | chr10:43579168-43584262   | 1.8519    | 1.7220    | -0.1049 | 0.688167 |
| <i>Mier2</i>         | chr10:79540244-79555199   | 7.7573    | 7.4782    | -0.0529 | 0.643568 |
| <i>Pwwp2a</i>        | chr11:43681997-43721491   | 8.0958    | 8.1614    | 0.0116  | 0.888742 |
| <i>Zfp62</i>         | chr11:49203291-49218816   | 37.6145   | 37.7220   | 0.0041  | 0.950563 |
| <i>Nlk</i>           | chr11:78567167-78697373   | 29.3088   | 29.3937   | 0.0042  | 0.945171 |
| <i>Xylt2</i>         | chr11:94663850-94677515   | 18.5710   | 18.0108   | -0.0442 | 0.512991 |
| <i>Phb</i>           | chr11:95666956-95680773   | 7.3480    | 7.4334    | 0.0167  | 0.878937 |
| <i>Fads6</i>         | chr11:115279621-115297663 | 0.4910    | 0.4533    | -0.1153 | 0.775294 |
| <i>Ccdc71l</i>       | chr12:32378788-32382943   | 14.9982   | 14.4929   | -0.0494 | 0.609873 |
| <i>Gm5436</i>        | chr12:84258331-84258973   | 2.1622    | 2.3023    | 0.0905  | 0.805224 |
| <i>Slc25a47</i>      | chr12:108851128-108856814 | 1.1803    | 1.2371    | 0.0677  | 0.805971 |
| <i>Ero1lb</i>        | chr13:12565882-12609526   | 6.0775    | 6.1259    | 0.0114  | 0.899879 |
| <i>Gm16907</i>       | chr13:63289600-63297147   | 17.3290   | 16.6701   | -0.0559 | 0.686668 |
| <i>A830009L08Rik</i> | chr13:91368987-91388085   | 0.5498    | 0.5076    | -0.1151 | 0.655994 |

|               |                           |          |          |         |          |
|---------------|---------------------------|----------|----------|---------|----------|
| Gm26931       | chr5:34481913-34482522    | 2.3226   | 2.4795   | 0.0943  | 0.752130 |
| Brap          | chr5:121660562-121687248  | 23.2231  | 23.2487  | 0.0016  | 0.969320 |
| P2rx4         | chr5:122707583-122729738  | 5.7527   | 5.5390   | -0.0546 | 0.617290 |
| Gm15903       | chr5:129727045-129728385  | 4.2503   | 4.4812   | 0.0763  | 0.624242 |
| Zkscan14      | chr5:145194945-145201868  | 13.7347  | 13.8782  | 0.0150  | 0.893407 |
| Trbj2-1       | chr6:41542753-41542803    | 113.2439 | 107.2650 | -0.0783 | 0.656885 |
| Capg          | chr6:72544390-72562983    | 5.1208   | 5.1892   | 0.0191  | 0.871730 |
| Tyropb        | chr7:30413787-30417577    | 5.4792   | 5.7015   | 0.0574  | 0.856253 |
| Igf1r         | chr7:67952858-68226780    | 1.1673   | 1.2036   | 0.0442  | 0.813880 |
| 2510016G02Rik | chr7:132889488-132931375  | 1.4634   | 1.3287   | -0.1393 | 0.720141 |
| Angpt2        | chr8:18690262-18741562    | 1.7308   | 1.8095   | 0.0641  | 0.877026 |
| Ell           | chr8:70539674-70592858    | 10.4197  | 10.5980  | 0.0245  | 0.896657 |
| Gm24455       | chr9:15313801-15313932    | 17.3435  | 15.9599  | -0.1199 | 0.736757 |
| Gm16845       | chr9:22071031-22086122    | 6.3026   | 6.4484   | 0.0330  | 0.845263 |
| Ubl7          | chr9:57910985-57929968    | 15.0815  | 15.2898  | 0.0198  | 0.873522 |
| Elovl5        | chr9:77917363-77984519    | 82.1995  | 82.5180  | 0.0056  | 0.936609 |
| Mb21d1        | chr9:78430525-78443237    | 3.1900   | 3.2364   | 0.0208  | 0.857832 |
| Myo10         | chr15:25622524-25813673   | 0.1990   | 0.2082   | 0.0650  | 0.706500 |
| Rbx1          | chr15:81466315-81476369   | 24.3380  | 24.6716  | 0.0196  | 0.890270 |
| Parvg         | chr15:84324025-84342978   | 48.1307  | 46.4567  | -0.0511 | 0.636228 |
| Map3k4        | chr17:12227620-12318660   | 14.8894  | 14.4471  | -0.0435 | 0.538980 |
| Rnps1         | chr17:24414674-24425895   | 15.3776  | 14.8343  | -0.0519 | 0.559338 |
| Tatbp         | chr17:33915898-33929288   | 110.6033 | 111.0675 | 0.0060  | 0.955154 |
| Alg3          | chr16:20605450-20610768   | 9.0970   | 9.2123   | 0.0182  | 0.795638 |
| Poglut1       | chr16:38525136-38550258   | 11.8742  | 11.4882  | -0.0477 | 0.525342 |
| Ccs           | chr19:4825365-4839322     | 22.0028  | 22.2460  | 0.0159  | 0.880683 |
| Taf6l         | chr19:8774353-8786417     | 4.6645   | 4.7048   | 0.0124  | 0.880462 |
| Pcna-ps2      | chr19:9283237-9284494     | 0.7678   | 0.8271   | 0.1072  | 0.759763 |
| Avpi1         | chr19:42123272-42129059   | 3.6146   | 3.3861   | -0.0942 | 0.714657 |
| Hps1          | chr19:42755104-42779978   | 7.2793   | 7.3465   | 0.0133  | 0.913147 |
| 9130011E15Rik | chr19:45818143-45998488   | 4.6792   | 4.7567   | 0.0237  | 0.838253 |
| Ppil3         | chr1:58430993-58445486    | 22.9658  | 23.1748  | 0.0131  | 0.900080 |
| G730003C15Rik | chr1:59119832-59122139    | 0.5950   | 0.5483   | -0.1179 | 0.304496 |
| Ptprn         | chr1:75247040-75264208    | 0.2141   | 0.1922   | -0.1557 | 0.738189 |
| Gm15427       | chr1:95498583-95499187    | 9.0174   | 8.4521   | -0.0934 | 0.717377 |
| Ccnt2         | chr1:127774163-127808061  | 18.3156  | 17.7454  | -0.0456 | 0.614030 |
| Gm24489       | chr1:161037600-161037681  | 88.3196  | 90.7639  | 0.0394  | 0.862482 |
| Ly9           | chr1:171588623-171607410  | 74.9659  | 72.4272  | -0.0497 | 0.644065 |
| Gm16147       | chr18:5611557-5611836     | 5.2350   | 4.6764   | -0.1628 | 0.765603 |
| Surf1         | chr2:26913382-26916530    | 33.2468  | 33.3544  | 0.0047  | 0.935180 |
| Sh3glb2       | chr2:30344808-30359337    | 21.3268  | 20.7043  | -0.0427 | 0.434100 |
| BC052040      | chr2:115581715-115778768  | 0.9221   | 0.9510   | 0.0445  | 0.746975 |
| Ptptra        | chr2:130450277-130554026  | 31.8195  | 31.8401  | 0.0009  | 0.982623 |
| Crnk1         | chr2:145917478-145935014  | 24.7580  | 24.9266  | 0.0098  | 0.920692 |
| Pabpc1l       | chr2:164025449-164050538  | 0.3884   | 0.4184   | 0.1072  | 0.703764 |
| Ttc14         | chr3:33799954-33814860    | 43.8514  | 42.4889  | -0.0455 | 0.626938 |
| Ccdc39        | chr3:33812361-33844310    | 3.7255   | 3.7892   | 0.0245  | 0.886247 |
| Ppm1l         | chr3:69316860-69560802    | 0.9239   | 0.8767   | -0.0756 | 0.705853 |
| Cyb5rl        | chr4:107066987-107088268  | 2.6062   | 2.4994   | -0.0603 | 0.670094 |
| Pithd1        | chr4:135975459-135987264  | 13.9550  | 14.0470  | 0.0095  | 0.879502 |
| Pln           | chr10:53337685-53345999   | 0.5123   | 0.5489   | 0.0995  | 0.826491 |
| Gal3st4       | chr5:138264920-138272840  | 2.0340   | 1.9261   | -0.0786 | 0.694111 |
| Stap1         | chr5:86071745-86103993    | 19.7307  | 19.0789  | -0.0485 | 0.623622 |
| Hook2         | chr8:84990594-85003364    | 2.6307   | 2.4987   | -0.0743 | 0.680201 |
| Atp5f1        | chr3:105942697-105960099  | 31.5252  | 31.8039  | 0.0127  | 0.914917 |
| Afap1         | chr5:35893318-36003923    | 1.8383   | 1.8581   | 0.0155  | 0.820035 |
| Zfp330        | chr8:82763620-82774160    | 25.4768  | 25.6260  | 0.0084  | 0.920200 |
| Zfp26         | chr9:20432971-20460162    | 19.1833  | 19.2456  | 0.0047  | 0.943506 |
| Dmxl1         | chr18:49832669-49965473   | 12.7259  | 12.3177  | -0.0470 | 0.668934 |
| Hmgn2         | chr4:133964737-133968650  | 3.0653   | 2.9116   | -0.0742 | 0.656079 |
| Cd8a          | chr6:71373426-71379171    | 343.8724 | 333.1614 | -0.0457 | 0.600233 |
| Zmynd11       | chr13:9684835-9765321     | 29.2750  | 28.5158  | -0.0379 | 0.286574 |
| Asic3         | chr5:24413450-24417834    | 1.5253   | 1.5857   | 0.0560  | 0.753250 |
| Rhno1         | chr6:128356999-128362911  | 17.0362  | 17.1603  | 0.0105  | 0.913095 |
| Gm26536       | chr14:62836907-62838207   | 0.7952   | 0.8644   | 0.1205  | 0.770127 |
| Donson        | chr16:91677267-91688765   | 32.7607  | 31.7629  | -0.0446 | 0.600382 |
| Gm2531        | chr18:10145452-10145965   | 7.2493   | 6.8130   | -0.0895 | 0.764826 |
| Acox1         | chr2:127838875-128123873  | 1.9415   | 1.8189   | -0.0941 | 0.780095 |
| Pinr          | chr4:21847582-21876475    | 47.1459  | 45.9194  | -0.0380 | 0.401774 |
| Rab21         | chr10:115289862-115315591 | 35.4292  | 34.2147  | -0.0503 | 0.660477 |
| Eci2          | chr13:34977747-35027094   | 12.6567  | 12.1725  | -0.0563 | 0.672224 |

|                      |                           |          |          |         |          |
|----------------------|---------------------------|----------|----------|---------|----------|
| <i>Rnpepl1</i>       | chr1:92910782-92924384    | 8.2397   | 7.9280   | -0.0556 | 0.727865 |
| <i>Lyrrm2</i>        | chr4:32800252-32801559    | 14.6777  | 14.9967  | 0.0310  | 0.873989 |
| <i>Mir25</i>         | chr5:138165320-138165404  | 17.9425  | 16.3790  | -0.1315 | 0.646249 |
| <i>Colq</i>          | chr14:31523081-31591343   | 0.6310   | 0.6621   | 0.0696  | 0.850330 |
| <i>Cacfd1</i>        | chr2:27009925-27021089    | 3.1818   | 3.0293   | -0.0708 | 0.717767 |
| <i>Adh5</i>          | chr3:138443092-138455499  | 41.3378  | 39.9196  | -0.0504 | 0.649130 |
| <i>Dpy19l4</i>       | chr4:11261314-11322137    | 5.1595   | 4.9811   | -0.0508 | 0.667498 |
| <i>Rps6ka1</i>       | chr4:133847289-133887797  | 48.5246  | 48.7201  | 0.0058  | 0.950673 |
| <i>Micu3</i>         | chr8:40307457-40386308    | 3.9552   | 3.8047   | -0.0560 | 0.707059 |
| <i>Gng5</i>          | chr3:146499833-146505572  | 15.4697  | 14.9133  | -0.0528 | 0.635296 |
| <i>Tle2</i>          | chr10:81574560-81590845   | 0.2515   | 0.2298   | -0.1303 | 0.705702 |
| <i>Pvt1</i>          | chr15:62037985-62378096   | 3.9641   | 3.9928   | 0.0104  | 0.903111 |
| <i>Cat</i>           | chr2:103453848-103485160  | 38.9772  | 39.1412  | 0.0061  | 0.931271 |
| <i>Gm12870</i>       | chr4:107327483-107328499  | 0.9850   | 1.0740   | 0.1248  | 0.845283 |
| <i>Efemp2</i>        | chr19:5473972-5481853     | 1.3782   | 1.4227   | 0.0458  | 0.769977 |
| <i>Ddx47</i>         | chr6:135011611-135023776  | 20.0616  | 19.4719  | -0.0430 | 0.478353 |
| <i>Psm5</i>          | chr3:108256925-108279974  | 10.9458  | 10.4560  | -0.0660 | 0.668173 |
| <i>Hsp90aa1</i>      | chr12:110690604-110702728 | 20.1732  | 20.4874  | 0.0223  | 0.905974 |
| <i>Fgfr1l</i>        | chr5:108694228-108706950  | 0.4494   | 0.4775   | 0.0873  | 0.803140 |
| <i>Prrc2b</i>        | chr2:32151081-32234537    | 21.2507  | 20.3756  | -0.0607 | 0.766036 |
| <i>Lamtor3</i>       | chr3:137918525-137928765  | 19.2596  | 19.3680  | 0.0081  | 0.904867 |
| <i>Twsg1</i>         | chr17:65923065-65951187   | 7.7628   | 7.8198   | 0.0106  | 0.917568 |
| <i>Slc39a13</i>      | chr2:91061790-91070417    | 3.3101   | 3.1754   | -0.0600 | 0.706054 |
| <i>Gjod1</i>         | chr13:43195518-43304172   | 3.5187   | 3.3672   | -0.0635 | 0.721968 |
| <i>Gm16153</i>       | chr10:4409032-4423369     | 2.2132   | 2.2536   | 0.0260  | 0.845348 |
| <i>Gm15122</i>       | chr10:80282443-80283006   | 5.8677   | 6.1728   | 0.0731  | 0.856704 |
| <i>Nol10</i>         | chr12:17348457-17430094   | 7.4959   | 7.5678   | 0.0138  | 0.878744 |
| <i>Gtf2h2</i>        | chr13:100460217-100492579 | 6.9959   | 6.7421   | -0.0533 | 0.604772 |
| <i>Tmem147</i>       | chr7:30727700-30729534    | 33.3905  | 33.7351  | 0.0148  | 0.895293 |
| <i>Usp10</i>         | chr8:119910359-119957560  | 13.3993  | 12.9788  | -0.0460 | 0.616728 |
| <i>Ube2q2</i>        | chr9:55148853-55207529    | 7.0326   | 7.0682   | 0.0073  | 0.911819 |
| <i>Pla2g6</i>        | chr15:79286227-79328390   | 1.8644   | 1.7795   | -0.0672 | 0.638408 |
| <i>Naa60</i>         | chr16:3872374-3904770     | 21.3863  | 21.4297  | 0.0029  | 0.966745 |
| <i>Gm14963</i>       | chr19:6268794-6276605     | 0.4910   | 0.4424   | -0.1505 | 0.692935 |
| <i>Cyb5a</i>         | chr18:84851337-84880401   | 47.6767  | 45.6773  | -0.0618 | 0.748308 |
| <i>Polr3f</i>        | chr2:144527717-144541995  | 10.8240  | 10.4978  | -0.0442 | 0.502361 |
| <i>Klf3b</i>         | chr2:153291412-15333390   | 16.8522  | 16.3583  | -0.0429 | 0.478486 |
| <i>Accs2os</i>       | chr2:155547039-155556930  | 10.5141  | 9.8673   | -0.0916 | 0.753850 |
| <i>6330416G13Rik</i> | chr4:63558780-63586357    | 10.1599  | 9.8404   | -0.0461 | 0.489083 |
| <i>Supv3l1</i>       | chr10:62429208-62449738   | 13.8784  | 13.9043  | 0.0027  | 0.949416 |
| <i>Gm16315</i>       | chr10:81301700-81302917   | 1.1844   | 1.0604   | -0.1595 | 0.769194 |
| <i>Cfap54</i>        | chr10:92775618-93081618   | 0.0492   | 0.0531   | 0.1113  | 0.823152 |
| <i>Cep83os</i>       | chr10:94673492-94688613   | 5.2717   | 5.3147   | 0.0117  | 0.918018 |
| <i>Igtp</i>          | chr11:58199555-58207591   | 149.1171 | 143.6891 | -0.0535 | 0.719941 |
| <i>Gm11646</i>       | chr11:106051150-106051852 | 16.5027  | 15.6172  | -0.0796 | 0.659885 |
| <i>St6galnac2</i>    | chr11:116675302-116694868 | 1.4172   | 1.3576   | -0.0620 | 0.643172 |
| <i>Ppm1a</i>         | chr12:72761210-72794940   | 32.3318  | 31.3414  | -0.0449 | 0.571781 |
| <i>Btbd6</i>         | chr12:112976481-112978930 | 22.4242  | 21.7008  | -0.0473 | 0.624690 |
| <i>Ywhah</i>         | chr5:33018815-33027966    | 17.4916  | 17.6221  | 0.0107  | 0.902332 |
| <i>Nup54</i>         | chr5:92415539-92435219    | 13.6174  | 13.1553  | -0.0498 | 0.623371 |
| <i>Gbas</i>          | chr5:129725062-129758327  | 13.3941  | 13.4470  | 0.0057  | 0.931836 |
| <i>Zfp786</i>        | chr6:47819265-47830867    | 0.2405   | 0.2584   | 0.1038  | 0.753911 |
| <i>Gimap1os</i>      | chr6:48738345-48740621    | 39.5616  | 38.2201  | -0.0498 | 0.658949 |
| <i>Slc25a26</i>      | chr6:94500313-94604648    | 3.7842   | 3.6071   | -0.0692 | 0.626646 |
| <i>Tatdn2</i>        | chr6:113697049-113711069  | 49.1073  | 47.8139  | -0.0385 | 0.425607 |
| <i>Thsd1</i>         | chr8:22227312-22261334    | 0.1857   | 0.1661   | -0.1606 | 0.624845 |
| <i>Pcm1</i>          | chr8:41239758-41334086    | 23.9701  | 23.2779  | -0.0423 | 0.594692 |
| <i>Ets1</i>          | chr9:32696041-32757820    | 500.5577 | 487.5428 | -0.0380 | 0.438066 |
| <i>Hykk</i>          | chr9:54917282-54949924    | 0.1169   | 0.1278   | 0.1291  | 0.807084 |
| <i>Msl2</i>          | chr9:101074726-101104784  | 42.9901  | 43.1430  | 0.0051  | 0.949889 |
| <i>Zfp182</i>        | chrX:21028938-21062316    | 11.4639  | 10.9960  | -0.0601 | 0.753694 |
| <i>Atp6ap1</i>       | chrX:74297096-74304721    | 40.8174  | 39.7177  | -0.0394 | 0.342187 |
| <i>Skp2</i>          | chr15:9111984-9140451     | 1.5944   | 1.5278   | -0.0616 | 0.574182 |
| <i>Gm17638</i>       | chr15:77961673-77967126   | 26.4432  | 25.7023  | -0.0410 | 0.449497 |
| <i>Cyth4</i>         | chr15:78597046-78622019   | 99.3817  | 99.9496  | 0.0082  | 0.940280 |
| <i>Bcdin3d</i>       | chr15:99470083-99474730   | 8.9514   | 9.0502   | 0.0158  | 0.817028 |
| <i>Csrnp2</i>        | chr15:100479569-100495239 | 5.2468   | 5.0546   | -0.0538 | 0.626948 |
| <i>Flywch1</i>       | chr17:23755422-23771591   | 8.5228   | 8.2202   | -0.0521 | 0.591427 |
| <i>Ager</i>          | chr17:34597861-34600934   | 1.7728   | 1.8448   | 0.0574  | 0.812779 |
| <i>NA</i>            | chr16:36875140-36875638   | 1.6956   | 1.5031   | -0.1738 | 0.763264 |
| <i>Rcan1</i>         | chr16:92391952-92466146   | 2.5402   | 2.5987   | 0.0328  | 0.837716 |



|                      |                           |          |          |         |          |
|----------------------|---------------------------|----------|----------|---------|----------|
| <i>Bbip1</i>         | chr19:53929676-53944627   | 40.3631  | 40.5834  | 0.0079  | 0.927430 |
| <i>Sumo1</i>         | chr1:59639433-59670834    | 20.0401  | 20.4494  | 0.0292  | 0.890935 |
| <i>Bmpr2</i>         | chr1:59764278-59870549    | 0.7308   | 0.7659   | 0.0677  | 0.815812 |
| <i>Ptprv</i>         | chr1:135108496-135132594  | 0.9036   | 0.9297   | 0.0411  | 0.869130 |
| <i>Gm15443</i>       | chr1:149025227-149026047  | 3.2535   | 3.0380   | -0.0989 | 0.638782 |
| <i>Nenf</i>          | chr1:191306788-191318194  | 4.0442   | 4.2489   | 0.0712  | 0.841311 |
| <i>Psmg2</i>         | chr18:67641598-67654162   | 26.0213  | 24.9560  | -0.0603 | 0.693621 |
| <i>Endog</i>         | chr2:30171492-30174069    | 14.7374  | 14.1506  | -0.0586 | 0.640606 |
| <i>Gm14165</i>       | chr2:152353614-152354566  | 1.1363   | 1.2235   | 0.1067  | 0.798847 |
| <i>Cebpb</i>         | chr2:167688914-167690418  | 3.7374   | 3.8700   | 0.0503  | 0.863504 |
| <i>Egf</i>           | chr3:129677574-129755322  | 0.8157   | 0.8386   | 0.0399  | 0.843811 |
| <i>Slc35d1</i>       | chr4:103170648-103215164  | 2.0429   | 1.9545   | -0.0638 | 0.679304 |
| <i>Ube4bos3</i>      | chr4:149334638-149335897  | 3.1876   | 3.3394   | 0.0671  | 0.851429 |
| <i>Traj51</i>        | chr14:54166238-54166281   | 16.4409  | 18.0302  | 0.1331  | 0.832149 |
| <i>A13000612Rik</i>  | chr2:22895320-22895736    | 2.7015   | 2.4304   | -0.1526 | 0.723144 |
| <i>Ttyh2</i>         | chr11:114675430-114720977 | 0.1899   | 0.2055   | 0.1138  | 0.805511 |
| <i>Tmem81</i>        | chr1:132506229-132508637  | 7.4743   | 7.1524   | -0.0635 | 0.716938 |
| <i>Fam101b</i>       | chr11:76019193-76027782   | 54.7491  | 53.0339  | -0.0459 | 0.665330 |
| <i>Fbxo31</i>        | chr8:121549439-121578806  | 5.7300   | 5.5075   | -0.0571 | 0.701184 |
| <i>Hdac11</i>        | chr6:91156664-91174692    | 0.2062   | 0.1859   | -0.1496 | 0.720584 |
| <i>Psemb1</i>        | chr17:15475720-15498276   | 159.1796 | 161.2321 | 0.0185  | 0.908219 |
| <i>Ints5</i>         | chr19:8892986-8897890     | 10.1846  | 10.2793  | 0.0134  | 0.909971 |
| <i>Ncdn</i>          | chr4:126743749-126753438  | 15.3463  | 15.5362  | 0.0177  | 0.916718 |
| <i>Alms1</i>         | chr6:85587530-85702753    | 1.2061   | 1.2249   | 0.0223  | 0.907070 |
| <i>Mapkapk5</i>      | chr5:121518612-121545905  | 11.4374  | 11.4578  | 0.0026  | 0.954235 |
| <i>Ccdc6</i>         | chr10:70097120-70193200   | 12.5452  | 12.5980  | 0.0061  | 0.951864 |
| <i>1810043G02Rik</i> | chr10:77978523-77986905   | 1.8322   | 1.8592   | 0.0211  | 0.884227 |
| <i>Midn</i>          | chr10:80148271-80158368   | 14.7094  | 14.8042  | 0.0093  | 0.934336 |
| <i>Krr1</i>          | chr10:111972663-111988432 | 25.0130  | 25.1121  | 0.0057  | 0.943747 |
| <i>Kcnmb4os1</i>     | chr10:116418051-116421237 | 2.6235   | 2.4452   | -0.1015 | 0.692026 |
| <i>Dctn2</i>         | chr10:127266261-127281959 | 39.8181  | 38.6786  | -0.0419 | 0.539338 |
| <i>Akt2-ps</i>       | chr11:16514532-16515981   | 1.6267   | 1.5049   | -0.1124 | 0.702752 |
| <i>0610010F05Rik</i> | chr11:23564960-23633639   | 3.6739   | 3.7075   | 0.0132  | 0.891992 |
| <i>Tbc1d9b</i>       | chr11:50131395-50172785   | 14.1025  | 14.1431  | 0.0041  | 0.961480 |
| <i>Nle1</i>          | chr11:82900767-82908411   | 9.4364   | 9.1273   | -0.0480 | 0.548881 |
| <i>Fam117a</i>       | chr11:95337017-95381872   | 34.6943  | 34.7574  | 0.0026  | 0.970367 |
| <i>Coa3</i>          | chr11:101277967-101279114 | 30.4725  | 29.2771  | -0.0577 | 0.681669 |
| <i>Taco1</i>         | chr11:106066060-106073612 | 8.5312   | 8.6575   | 0.0212  | 0.896845 |
| <i>Myo15b</i>        | chr11:115861611-115892603 | 0.1197   | 0.1088   | -0.1371 | 0.501217 |
| <i>Trib2</i>         | chr12:15791726-15816877   | 46.7334  | 45.3013  | -0.0449 | 0.631800 |
| <i>Eapp</i>          | chr12:54670339-54695897   | 10.8579  | 10.9700  | 0.0148  | 0.920950 |
| <i>Rps6ka5</i>       | chr12:100549777-100725028 | 5.2374   | 5.0453   | -0.0539 | 0.645260 |
| <i>Hrh2</i>          | chr13:54192128-54222432   | 5.3131   | 5.4099   | 0.0260  | 0.905146 |
| <i>Pdcd6</i>         | chr13:74303120-74317326   | 52.5691  | 52.8780  | 0.0085  | 0.933033 |
| <i>Nln</i>           | chr13:104023438-104109614 | 6.2279   | 6.2679   | 0.0092  | 0.909056 |
| <i>Nrf1</i>          | chr6:30047987-30153458    | 9.2092   | 8.9694   | -0.0381 | 0.219418 |
| <i>Kdm3a</i>         | chr6:71588973-71632905    | 45.7258  | 45.8333  | 0.0034  | 0.965161 |
| <i>A430078102Rik</i> | chr6:86470804-86480830    | 1.3225   | 1.3772   | 0.0585  | 0.813818 |
| <i>Vmn2r29</i>       | chr7:7231326-7278289      | 0.4516   | 0.4853   | 0.1040  | 0.821835 |
| <i>Mark4</i>         | chr7:19426074-19458494    | 6.1040   | 5.8575   | -0.0595 | 0.704394 |
| <i>Zfp146</i>        | chr7:30161273-30169727    | 39.7717  | 38.6034  | -0.0430 | 0.500452 |
| <i>Rbm42</i>         | chr7:30640993-30650317    | 30.6512  | 29.5390  | -0.0533 | 0.699408 |
| <i>Gapdhs</i>        | chr7:30729774-30743681    | 5.0327   | 4.8236   | -0.0612 | 0.224878 |
| <i>Gm16157</i>       | chr7:68266338-68276594    | 5.1013   | 4.8546   | -0.0715 | 0.669930 |
| <i>Xrra1</i>         | chr7:99859217-99917824    | 0.6572   | 0.6865   | 0.0628  | 0.779363 |
| <i>Dnhd1</i>         | chr7:105640561-105721799  | 2.1065   | 2.0370   | -0.0484 | 0.543428 |
| <i>Hsd3b7</i>        | chr7:127785607-127803802  | 3.6795   | 3.7245   | 0.0175  | 0.910458 |
| <i>Ap3m2</i>         | chr8:22787353-22805654    | 15.6591  | 15.7204  | 0.0056  | 0.940422 |
| <i>Erlin2</i>        | chr8:27023798-27039433    | 9.0586   | 9.0989   | 0.0064  | 0.939565 |
| <i>Gm10033</i>       | chr8:69372144-69373383    | 5.1436   | 5.2993   | 0.0430  | 0.810181 |
| <i>Gm10644</i>       | chr8:83932328-83955205    | 4.8976   | 4.7050   | -0.0579 | 0.639486 |
| <i>Wdr83</i>         | chr8:85075034-85081306    | 13.3823  | 13.4654  | 0.0089  | 0.931053 |
| <i>Znrf1</i>         | chr8:111536096-111626030  | 17.7887  | 17.2547  | -0.0440 | 0.625508 |
| <i>Msantd4</i>       | chr9:4383534-4386861      | 12.8913  | 13.0550  | 0.0182  | 0.906861 |
| <i>Ndufaf3</i>       | chr9:108565865-108567342  | 12.6789  | 12.1601  | -0.0603 | 0.600723 |
| <i>Ltf</i>           | chr9:111019291-111042766  | 0.5574   | 0.6753   | 0.2767  | 0.703184 |
| <i>Gm14890</i>       | chrX:59196962-59197638    | 1.3906   | 1.2568   | -0.1459 | 0.787340 |
| <i>Sms</i>           | chrX:157443854-157492287  | 6.8372   | 6.9031   | 0.0138  | 0.907956 |
| <i>Ext1</i>          | chr15:53064037-53346159   | 4.8169   | 4.6587   | -0.0482 | 0.631306 |
| <i>9130401M01Rik</i> | chr15:58022275-58076425   | 16.5957  | 15.9412  | -0.0580 | 0.705195 |
| <i>Mief1</i>         | chr15:80234079-80253366   | 13.3534  | 12.9511  | -0.0441 | 0.618280 |

|                      |                           |          |          |         |          |
|----------------------|---------------------------|----------|----------|---------|----------|
| <i>Polr3h</i>        | chr15:81915029-81926213   | 8.5148   | 8.1932   | -0.0555 | 0.637115 |
| <i>Socs4</i>         | chr14:47276930-47296098   | 10.9312  | 11.0162  | 0.0112  | 0.927772 |
| <i>Nupl1</i>         | chr14:60219203-60251507   | 39.3899  | 39.4338  | 0.0016  | 0.977214 |
| <i>Neil2</i>         | chr14:63182442-63193541   | 0.6745   | 0.6136   | -0.1365 | 0.699862 |
| <i>Zfp395</i>        | chr14:65358675-65398930   | 1.8423   | 1.9030   | 0.0467  | 0.877243 |
| <i>Nme4</i>          | chr17:26091733-26095508   | 6.5098   | 6.7454   | 0.0513  | 0.881191 |
| <i>Gm17080</i>       | chr17:45586119-45588377   | 11.2901  | 11.4421  | 0.0193  | 0.756094 |
| <i>Foxp4</i>         | chr17:47867132-47924645   | 2.7185   | 2.6011   | -0.0637 | 0.743072 |
| <i>Ccdc74a</i>       | chr16:17646469-17650738   | 0.6993   | 0.6481   | -0.1095 | 0.551231 |
| <i>Gna14</i>         | chr19:16435666-16610818   | 0.8375   | 0.8666   | 0.0492  | 0.775187 |
| <i>Gm20616</i>       | chr19:26620821-26623419   | 1.2370   | 1.3119   | 0.0847  | 0.701288 |
| <i>Nfkb2</i>         | chr19:46304736-46312090   | 20.4867  | 19.8811  | -0.0433 | 0.495880 |
| <i>Fbxl15</i>        | chr19:46328183-46330446   | 2.2593   | 2.3484   | 0.0558  | 0.831238 |
| <i>AA986860</i>      | chr1:130731975-130744621  | 0.2627   | 0.2844   | 0.1146  | 0.789224 |
| <i>Tiprl</i>         | chr1:165214921-165236943  | 21.6716  | 20.9672  | -0.0477 | 0.560655 |
| <i>Gm26533</i>       | chr18:31781225-31789045   | 10.0850  | 9.6991   | -0.0563 | 0.692409 |
| <i>Klf20a</i>        | chr18:34624623-34633265   | 7.7255   | 7.8505   | 0.0232  | 0.914027 |
| <i>Arap3</i>         | chr18:37972623-37997574   | 0.3225   | 0.2901   | -0.1527 | 0.793219 |
| <i>Synpo</i>         | chr18:60593972-60660142   | 0.1130   | 0.0994   | -0.1842 | 0.748621 |
| <i>Slc25a12</i>      | chr2:71271062-71367749    | 14.3769  | 13.9781  | -0.0406 | 0.445457 |
| <i>Ube2e3</i>        | chr2:78868123-78921293    | 3.0562   | 2.9326   | -0.0595 | 0.643881 |
| <i>n-R5s202</i>      | chr2:112469252-112469366  | 7.5087   | 8.1652   | 0.1209  | 0.806298 |
| <i>Strc</i>          | chr2:121363727-121387168  | 0.2010   | 0.1569   | -0.3569 | 0.713159 |
| <i>Gmps</i>          | chr3:63976105-64022579    | 10.7727  | 10.4408  | -0.0452 | 0.612313 |
| <i>Dclk2</i>         | chr3:86786149-86920884    | 1.2504   | 1.1918   | -0.0692 | 0.603487 |
| <i>Prune</i>         | chr3:95253673-95282076    | 4.9029   | 4.7260   | -0.0530 | 0.602553 |
| <i>Ap1ar</i>         | chr3:127807263-127837492  | 35.4389  | 34.2489  | -0.0493 | 0.687453 |
| <i>5730508B09Rik</i> | chr3:127869687-127896323  | 51.0882  | 51.7051  | 0.0173  | 0.913862 |
| <i>Prkacb</i>        | chr3:146729578-146812960  | 83.8418  | 83.9678  | 0.0022  | 0.972493 |
| <i>Chmp5</i>         | chr4:40948406-40965303    | 40.0638  | 40.3334  | 0.0097  | 0.930055 |
| <i>Vcp</i>           | chr4:42979962-43000507    | 17.0919  | 16.6176  | -0.0406 | 0.515211 |
| <i>Stil</i>          | chr4:115000158-115043196  | 0.4237   | 0.4416   | 0.0595  | 0.857363 |
| <i>9930104L06Rik</i> | chr4:124937047-124944656  | 6.3171   | 6.1092   | -0.0483 | 0.544334 |
| <i>Masp2</i>         | chr4:148602553-148615499  | 20.6269  | 19.9515  | -0.0480 | 0.674353 |
| <i>Hist1h2ae</i>     | chr13:23570516-23571220   | 1.2936   | 1.1553   | -0.1630 | 0.749623 |
| <i>Traj1</i>         | chr14:54218813-54218840   | 34.8975  | 31.2671  | -0.1585 | 0.676841 |
| <i>Ctnnbip1</i>      | chr4:149518235-149566437  | 0.3835   | 0.4107   | 0.0989  | 0.851517 |
| <i>Wfs1</i>          | chr5:36966103-36988982    | 0.4048   | 0.4243   | 0.0680  | 0.823760 |
| <i>Ywhaq</i>         | chr12:21390070-21417637   | 14.7466  | 14.2826  | -0.0461 | 0.582950 |
| <i>Gm17039</i>       | chr13:67360670-67365679   | 5.7630   | 5.8064   | 0.0108  | 0.913280 |
| <i>Gpn1</i>          | chr5:31494740-31512903    | 5.7720   | 5.5827   | -0.0481 | 0.597101 |
| <i>Golga3</i>        | chr5:110176700-110226470  | 11.0387  | 10.7518  | -0.0380 | 0.336972 |
| <i>Oat</i>           | chr7:132557474-132576398  | 25.4766  | 24.6122  | -0.0498 | 0.669203 |
| <i>Gm10701</i>       | chr9:24341656-24418709    | 0.8364   | 0.9088   | 0.1199  | 0.721934 |
| <i>Glra4</i>         | chrX:136757673-136780141  | 0.8318   | 0.7678   | -0.1154 | 0.643346 |
| <i>Pnp</i>           | chr14:50944301-50965237   | 7.7609   | 7.8095   | 0.0090  | 0.921777 |
| <i>Zfp944</i>        | chr17:22337988-22361400   | 14.4483  | 13.9371  | -0.0520 | 0.710821 |
| <i>Zfp955a</i>       | chr17:33241518-33255040   | 9.8199   | 9.9735   | 0.0224  | 0.892502 |
| <i>Gm24871</i>       | chr1:171503047-171503163  | 68.2793  | 73.3067  | 0.1025  | 0.844170 |
| <i>Gmeb1</i>         | chr4:132221024-132261602  | 5.2907   | 5.1324   | -0.0438 | 0.441695 |
| <i>Nf2</i>           | chr11:4765844-4849536     | 9.9213   | 9.9665   | 0.0066  | 0.940641 |
| <i>Tmem256</i>       | chr11:69838513-69839618   | 10.7223  | 10.2362  | -0.0669 | 0.730977 |
| <i>Dhx8</i>          | chr11:101732918-101767358 | 23.2427  | 22.5816  | -0.0416 | 0.550823 |
| <i>Exoc7</i>         | chr11:116288000-116307233 | 12.7618  | 12.3396  | -0.0485 | 0.620234 |
| <i>Ube2o</i>         | chr11:116537739-116581447 | 3.7679   | 3.6230   | -0.0566 | 0.734205 |
| <i>Gaa</i>           | chr11:119267886-119285454 | 5.6477   | 5.4338   | -0.0557 | 0.712699 |
| <i>NA</i>            | chr12:69361184-69361481   | 3.6118   | 3.2962   | -0.1319 | 0.737822 |
| <i>Dcaf4</i>         | chr12:83520465-83541988   | 12.1470  | 12.2164  | 0.0082  | 0.916654 |
| <i>Inf2</i>          | chr12:112588783-112615556 | 3.8988   | 3.7569   | -0.0535 | 0.682207 |
| <i>Oas1b</i>         | chr5:120812634-120824163  | 17.9673  | 17.2219  | -0.0611 | 0.741180 |
| <i>Gm15751</i>       | chr5:123508394-123514011  | 10.8056  | 10.4056  | -0.0544 | 0.693286 |
| <i>Nod1</i>          | chr6:54923941-54972612    | 18.4122  | 18.6312  | 0.0171  | 0.932518 |
| <i>Aldh1l1</i>       | chr6:90486426-90600203    | 0.4988   | 0.5218   | 0.0652  | 0.832405 |
| <i>Rps5</i>          | chr7:12922289-12926686    | 795.6776 | 808.5081 | 0.0231  | 0.912339 |
| <i>Mir343</i>        | chr7:19386642-19386717    | 21.4422  | 22.5623  | 0.0735  | 0.761953 |
| <i>Ctsd</i>          | chr7:142371147-142388038  | 195.1202 | 195.1521 | 0.0002  | 0.997635 |
| <i>Syce1l</i>        | chr8:113643212-113655533  | 1.3811   | 1.4774   | 0.0973  | 0.820993 |
| <i>Ube4a</i>         | chr9:44923130-44965600    | 14.6528  | 14.2221  | -0.0430 | 0.645780 |
| <i>Sec22c</i>        | chr9:121680046-121705490  | 9.2202   | 9.2360   | 0.0025  | 0.963370 |
| <i>1110059G10Rik</i> | chr9:122945088-122951000  | 5.6277   | 5.6712   | 0.0111  | 0.894319 |
| <i>Cdk16</i>         | chrX:20687953-20699880    | 10.2104  | 10.2497  | 0.0055  | 0.944352 |

|                      |                           |          |          |         |          |
|----------------------|---------------------------|----------|----------|---------|----------|
| <i>Xiap</i>          | chrX:42059678-42109656    | 13.0425  | 13.1141  | 0.0079  | 0.938917 |
| <i>Tbl1x</i>         | chrX:77511012-77662983    | 20.9591  | 20.9343  | -0.0017 | 0.972155 |
| <i>Dcaf13</i>        | chr15:39112873-39146856   | 46.9712  | 47.1094  | 0.0042  | 0.954061 |
| <i>Gm16712</i>       | chr17:55954770-55959381   | 0.6038   | 0.5482   | -0.1395 | 0.747201 |
| <i>Zfp36l2</i>       | chr17:84183930-84187947   | 52.6006  | 53.0291  | 0.0117  | 0.939591 |
| <i>Gtf2e1</i>        | chr16:37509789-37539789   | 6.3006   | 6.3258   | 0.0058  | 0.939768 |
| <i>Zfand5</i>        | chr19:21272277-21282289   | 11.0940  | 11.1122  | 0.0024  | 0.968344 |
| <i>Mms19</i>         | chr19:41941085-41981157   | 14.6118  | 14.6430  | 0.0031  | 0.973836 |
| <i>Got1</i>          | chr19:43499751-43524605   | 9.6102   | 9.6785   | 0.0102  | 0.911635 |
| <i>Gm20538</i>       | chr19:44543721-44552831   | 48.5931  | 46.3219  | -0.0691 | 0.746812 |
| <i>Hjurp</i>         | chr1:88262470-88277633    | 26.3043  | 25.5068  | -0.0444 | 0.667613 |
| <i>NA</i>            | chr2:3504528-3512759      | 8.2764   | 8.0251   | -0.0445 | 0.460352 |
| <i>Gm13919</i>       | chr2:102039628-102066725  | 1.0751   | 0.9917   | -0.1165 | 0.736477 |
| <i>4931422A03Rik</i> | chr2:103966942-104028361  | 1.5726   | 1.4640   | -0.1032 | 0.711077 |
| <i>Adrm1</i>         | chr2:180171484-180176286  | 5.2867   | 5.1026   | -0.0511 | 0.626830 |
| <i>Gm17690</i>       | chr3:96167463-96172414    | 4.7069   | 4.5486   | -0.0494 | 0.274861 |
| <i>Polr3gl</i>       | chr3:96577871-96594181    | 12.5005  | 12.7421  | 0.0276  | 0.886081 |
| <i>Rars2</i>         | chr4:34614956-34660167    | 13.9064  | 13.9806  | 0.0077  | 0.944472 |
| <i>Exosc3</i>        | chr4:45316612-45342732    | 33.6771  | 33.8866  | 0.0089  | 0.924803 |
| <i>Stk40</i>         | chr4:126103956-126141029  | 7.4230   | 7.1786   | -0.0483 | 0.655256 |
| <i>Hp1bp3</i>        | chr4:138216295-138244683  | 59.7712  | 59.6301  | -0.0034 | 0.906885 |
| <i>Exosc10</i>       | chr4:148558428-148582401  | 36.5920  | 36.5904  | -0.0001 | 0.999160 |
| <i>Aldh3a2</i>       | chr11:61223416-61267464   | 12.4961  | 12.1553  | -0.0399 | 0.413515 |
| <i>BC017158</i>      | chr7:128271378-128298170  | 6.0632   | 5.8634   | -0.0484 | 0.662158 |
| <i>Agap3</i>         | chr5:24452176-24502047    | 17.6314  | 16.9899  | -0.0535 | 0.729912 |
| <i>Prkag2</i>        | chr5:24862743-25100642    | 5.4362   | 5.2668   | -0.0457 | 0.642797 |
| <i>Zfyve28</i>       | chr5:34194873-34288449    | 0.1590   | 0.1717   | 0.1106  | 0.805439 |
| <i>Gramd4</i>        | chr15:86057694-86137634   | 63.9114  | 62.0102  | -0.0436 | 0.644424 |
| <i>Appl1</i>         | chr14:26918987-26971232   | 12.4971  | 12.1565  | -0.0399 | 0.494990 |
| <i>Wdhd1</i>         | chr14:47240943-47276832   | 5.4302   | 5.2577   | -0.0466 | 0.632341 |
| <i>Traj7</i>         | chr14:54211469-54211528   | 61.4763  | 57.5495  | -0.0952 | 0.768836 |
| <i>Pogz</i>          | chr3:94837566-94882326    | 6.2179   | 6.0340   | -0.0433 | 0.638246 |
| <i>Papolg</i>        | chr11:23862645-23895253   | 22.1107  | 22.1178  | 0.0005  | 0.992151 |
| <i>Zfp825</i>        | chr13:74480516-74482943   | 7.3926   | 7.0045   | -0.0778 | 0.726216 |
| <i>Lnx2</i>          | chr5:147016654-147076586  | 11.9198  | 11.5308  | -0.0479 | 0.688695 |
| <i>Akt1s1</i>        | chr7:44848990-44855421    | 8.8814   | 8.9741   | 0.0150  | 0.914182 |
| <i>Abhd14a</i>       | chr9:106440050-106447678  | 4.3766   | 4.1718   | -0.0691 | 0.678217 |
| <i>Baiap3</i>        | chr17:25242658-25256364   | 12.8131  | 12.9172  | 0.0117  | 0.940753 |
| <i>Aven</i>          | chr2:112492963-112634573  | 11.2141  | 11.3110  | 0.0124  | 0.919130 |
| <i>Gar1</i>          | chr3:129824911-129831396  | 5.4620   | 5.2351   | -0.0612 | 0.723387 |
| <i>Phc2</i>          | chr4:128654701-128752881  | 9.0196   | 9.0577   | 0.0061  | 0.955268 |
| <i>Trav10</i>        | chr14:53505789-53506286   | 3.7454   | 3.4165   | -0.1326 | 0.665465 |
| <i>Vps13c</i>        | chr9:67840395-67995634    | 15.4435  | 14.9162  | -0.0501 | 0.742556 |
| <i>Pemt</i>          | chr11:59970613-60046489   | 1.5643   | 1.4812   | -0.0787 | 0.312655 |
| <i>Mybbp1a</i>       | chr11:72441354-72451768   | 34.3067  | 34.2272  | -0.0033 | 0.930291 |
| <i>Gosr2</i>         | chr11:103676848-103697898 | 35.1283  | 35.2069  | 0.0032  | 0.966034 |
| <i>N4bp2l2</i>       | chr5:150608006-150665612  | 22.1516  | 22.2168  | 0.0042  | 0.960692 |
| <i>Arap1</i>         | chr7:101348066-101412586  | 13.1456  | 12.7335  | -0.0459 | 0.674022 |
| <i>Fam35a</i>        | chr14:34237040-34310503   | 9.7889   | 9.5086   | -0.0419 | 0.330181 |
| <i>Zmym1</i>         | chr4:127047093-127061152  | 12.2505  | 12.2958  | 0.0053  | 0.937989 |
| <i>Maged1</i>        | chrX:94535473-94542143    | 0.1980   | 0.1771   | -0.1613 | 0.725240 |
| <i>Set</i>           | chr2:30057377-30072577    | 20.8273  | 20.1511  | -0.0476 | 0.664174 |
| <i>Cnksr3</i>        | chr10:7119062-7212237     | 1.7871   | 1.7161   | -0.0585 | 0.654304 |
| <i>L3mbtl3</i>       | chr10:26274467-26375185   | 21.2956  | 20.7291  | -0.0389 | 0.387196 |
| <i>Tube1</i>         | chr10:39134022-39151058   | 1.2032   | 1.1425   | -0.0747 | 0.742266 |
| <i>Rev3l</i>         | chr10:39732117-39875211   | 18.3479  | 18.4458  | 0.0077  | 0.947955 |
| <i>Cep57l1</i>       | chr10:41718839-41809607   | 15.3570  | 15.4458  | 0.0083  | 0.937663 |
| <i>Ostm1</i>         | chr10:42583821-42702459   | 13.8284  | 13.4124  | -0.0441 | 0.651393 |
| <i>Micu1</i>         | chr10:59702476-59864132   | 2.9753   | 2.8791   | -0.0474 | 0.562095 |
| <i>Bsg</i>           | chr10:79704490-79711969   | 40.5117  | 39.4385  | -0.0387 | 0.488615 |
| <i>Tmem259</i>       | chr10:79974947-79984330   | 28.5002  | 27.6043  | -0.0461 | 0.717071 |
| <i>Uqcr11</i>        | chr10:80402996-80406830   | 34.8080  | 35.4335  | 0.0257  | 0.903237 |
| <i>Nfic</i>          | chr10:81396185-81431005   | 1.0091   | 1.0370   | 0.0393  | 0.895817 |
| <i>Zfp433</i>        | chr10:81718918-81721468   | 1.8438   | 1.8992   | 0.0426  | 0.877081 |
| <i>Rtcb</i>          | chr10:85938636-85957823   | 76.4163  | 74.2300  | -0.0419 | 0.628002 |
| <i>Mrpl42</i>        | chr10:95480805-95501927   | 37.8351  | 38.3482  | 0.0194  | 0.908772 |
| <i>Xpot</i>          | chr10:121587379-121626316 | 10.6132  | 10.3432  | -0.0372 | 0.440090 |
| <i>Ppm1h</i>         | chr10:122678761-122945795 | 35.0983  | 35.1687  | 0.0029  | 0.979053 |
| <i>Dgka</i>          | chr10:128720140-128744056 | 380.7322 | 372.1106 | -0.0330 | 0.241667 |
| <i>Sec14l2</i>       | chr11:4097038-4123415     | 0.5125   | 0.5347   | 0.0612  | 0.768144 |
| <i>Ewsr1</i>         | chr11:5069688-5099266     | 57.3665  | 57.3639  | -0.0001 | 0.999246 |

|                      |                           |          |          |         |          |
|----------------------|---------------------------|----------|----------|---------|----------|
| <i>Slc1a4</i>        | chr11:20302179-20332713   | 0.4205   | 0.4463   | 0.0859  | 0.829552 |
| <i>9130230N09Rik</i> | chr11:22858930-22861264   | 4.2937   | 4.0689   | -0.0776 | 0.629002 |
| <i>Snrnp25</i>       | chr11:32205414-32208984   | 6.9986   | 6.6574   | -0.0721 | 0.736211 |
| <i>Lcp2</i>          | chr11:34046919-34092295   | 61.5991  | 61.4317  | -0.0039 | 0.901111 |
| <i>Jade2</i>         | chr11:51813454-51857653   | 13.1139  | 13.0969  | -0.0019 | 0.979179 |
| <i>Irf1</i>          | chr11:53770013-53778374   | 127.5521 | 127.5597 | 0.0001  | 0.999126 |
| <i>4933426K07Rik</i> | chr11:57655414-57657826   | 1.8637   | 1.7451   | -0.0948 | 0.799442 |
| <i>Arf1</i>          | chr11:59211411-59228270   | 60.5735  | 58.9343  | -0.0396 | 0.604007 |
| <i>Zfp286</i>        | chr11:62753376-62789462   | 1.5655   | 1.4928   | -0.0686 | 0.668528 |
| <i>Stx8</i>          | chr11:67966192-68207148   | 4.0414   | 4.0562   | 0.0053  | 0.946664 |
| <i>Ndel1</i>         | chr11:68821433-68871858   | 20.7192  | 20.7437  | 0.0017  | 0.980776 |
| <i>2310047M10Rik</i> | chr11:69059774-69061576   | 7.9247   | 7.6240   | -0.0558 | 0.724944 |
| <i>Snord118</i>      | chr11:69073426-69073561   | 7.9742   | 8.6040   | 0.1097  | 0.873240 |
| <i>2810408A11Rik</i> | chr11:69897351-69900987   | 1.8791   | 1.7810   | -0.0773 | 0.696964 |
| <i>Elp5</i>          | chr11:69968221-69982517   | 11.6447  | 11.2782  | -0.0461 | 0.633185 |
| <i>Gm12333</i>       | chr11:75036475-75039348   | 0.5936   | 0.5484   | -0.1142 | 0.648667 |
| <i>Abr</i>           | chr11:76416733-76622314   | 14.7821  | 14.4342  | -0.0344 | 0.389745 |
| <i>BC030499</i>      | chr11:78290840-78296805   | 0.8477   | 0.8055   | -0.0737 | 0.627235 |
| <i>Fam58b</i>        | chr11:78750506-78751729   | 28.7665  | 28.7551  | -0.0006 | 0.985902 |
| <i>Rab11fip4</i>     | chr11:79591211-79698023   | 13.6695  | 13.6881  | 0.0020  | 0.981015 |
| <i>Crlf3</i>         | chr11:80046492-80080991   | 81.8589  | 81.8709  | 0.0002  | 0.997937 |
| <i>Slfn5os</i>       | chr11:82942340-82960681   | 4.6332   | 4.7952   | 0.0496  | 0.830103 |
| <i>Ppm1e</i>         | chr11:87226905-87359023   | 0.3114   | 0.3226   | 0.0507  | 0.733512 |
| <i>Rad51c</i>        | chr11:87376644-87404954   | 0.4451   | 0.4601   | 0.0478  | 0.741145 |
| <i>Fkbp10</i>        | chr11:100415696-100424824 | 0.4167   | 0.3856   | -0.1117 | 0.531432 |
| <i>Acbd4</i>         | chr11:103101681-103112200 | 8.1150   | 7.8372   | -0.0502 | 0.673245 |
| <i>Amz2</i>          | chr11:109425945-109452813 | 9.7567   | 9.4636   | -0.0440 | 0.639082 |
| <i>Prkar1a</i>       | chr11:109649404-109669656 | 78.8043  | 78.6366  | -0.0031 | 0.956912 |
| <i>Rptor</i>         | chr11:119602904-119899576 | 5.2861   | 5.3248   | 0.0105  | 0.947204 |
| <i>Aspscr1</i>       | chr11:120672972-120709447 | 10.1613  | 9.8584   | -0.0437 | 0.563797 |
| <i>Gps1</i>          | chr11:120784271-120789102 | 5.8448   | 5.6407   | -0.0513 | 0.600237 |
| <i>Dnmt3aos</i>      | chr12:3859292-3862244     | 0.6318   | 0.5706   | -0.1470 | 0.767161 |
| <i>Gen1</i>          | chr12:11240925-11265787   | 2.1321   | 2.1601   | 0.0189  | 0.866478 |
| <i>Tmem18</i>        | chr12:30584442-30591213   | 18.6171  | 18.0594  | -0.0439 | 0.597015 |
| <i>Atxn7l1os2</i>    | chr12:33358242-33394760   | 2.1557   | 2.0297   | -0.0869 | 0.740204 |
| <i>Ahr</i>           | chr12:35497973-35535038   | 1.0588   | 1.0117   | -0.0656 | 0.641376 |
| <i>Pcnxl4</i>        | chr12:72536356-72580213   | 2.6891   | 2.5838   | -0.0577 | 0.633511 |
| <i>Prkch</i>         | chr12:73584796-73778185   | 108.7807 | 106.2400 | -0.0341 | 0.349792 |
| <i>Fut8</i>          | chr12:77238103-77476338   | 9.1501   | 9.1711   | 0.0033  | 0.964575 |
| <i>Rad51b</i>        | chr12:79297350-79508656   | 0.5756   | 0.5249   | -0.1330 | 0.725584 |
| <i>Slc39a9</i>       | chr12:80644214-80683341   | 6.1024   | 5.9220   | -0.0433 | 0.612475 |
| <i>Adam4</i>         | chr12:81419442-81421946   | 0.9588   | 0.9026   | -0.0871 | 0.743696 |
| <i>Pcnx</i>          | chr12:81860029-82000924   | 4.7465   | 4.7930   | 0.0141  | 0.930140 |
| <i>Mlh3</i>          | chr12:85234528-85270591   | 8.0530   | 7.8059   | -0.0450 | 0.582289 |
| <i>Angel1</i>        | chr12:86700501-86726460   | 1.8565   | 1.8801   | 0.0182  | 0.877507 |
| <i>Ttc3</i>          | chr12:98920573-98983238   | 0.4391   | 0.4019   | -0.1278 | 0.778852 |
| <i>9030617O03Rik</i> | chr12:100779056-100896981 | 8.0342   | 7.7632   | -0.0495 | 0.695843 |
| <i>Ccdc88c</i>       | chr12:100912699-101028983 | 73.1582  | 71.1425  | -0.0403 | 0.669286 |
| <i>Gm17111</i>       | chr12:110664891-110665408 | 15.7030  | 14.8824  | -0.0774 | 0.764687 |
| <i>Zscan26</i>       | chr13:21442174-21453730   | 41.3560  | 40.1344  | -0.0433 | 0.728343 |
| <i>NA</i>            | chr13:21782914-21783397   | 8.3481   | 8.5731   | 0.0384  | 0.881990 |
| <i>Aldh5a1</i>       | chr13:24907578-24937661   | 0.2180   | 0.2322   | 0.0909  | 0.827735 |
| <i>Rreb1</i>         | chr13:37778399-37952002   | 3.4630   | 3.3378   | -0.0531 | 0.748760 |
| <i>Tbc1d7</i>        | chr13:43151743-43171501   | 4.0373   | 3.8563   | -0.0662 | 0.626032 |
| <i>Sfxn1</i>         | chr13:54071844-54108346   | 23.6173  | 22.9825  | -0.0393 | 0.588847 |
| <i>Gm17108</i>       | chr13:69610497-69614901   | 8.1598   | 7.9003   | -0.0466 | 0.548353 |
| <i>Zfp72</i>         | chr13:74371425-74376566   | 2.5099   | 2.5872   | 0.0438  | 0.845367 |
| <i>Gm9776</i>        | chr13:94355838-94358818   | 0.6242   | 0.5808   | -0.1039 | 0.828354 |
| <i>Sv2c</i>          | chr13:95959442-96132577   | 0.7931   | 0.8130   | 0.0358  | 0.886642 |
| <i>Mocs2</i>         | chr13:114818243-114829006 | 12.0004  | 12.0767  | 0.0091  | 0.941734 |
| <i>BC147527</i>      | chr13:120308145-120308649 | 41.8839  | 39.9964  | -0.0665 | 0.759048 |
| <i>Krit1</i>         | chr5:3803164-3844515      | 24.9900  | 25.0259  | 0.0021  | 0.978811 |
| <i>Rbks</i>          | chr5:31624438-31697627    | 5.2885   | 5.3694   | 0.0219  | 0.842237 |
| <i>Ppp1cb</i>        | chr5:32458973-32517433    | 31.7799  | 30.8885  | -0.0410 | 0.624334 |
| <i>Prr14l</i>        | chr5:32789217-32854256    | 14.2882  | 13.9130  | -0.0384 | 0.549554 |
| <i>Maea</i>          | chr5:33335571-33373294    | 32.5695  | 31.6820  | -0.0399 | 0.531917 |
| <i>Gm17207</i>       | chr5:73210108-73212634    | 2.2647   | 2.4046   | 0.0865  | 0.881160 |
| <i>Uba6</i>          | chr5:86110719-86172803    | 13.6247  | 13.6630  | 0.0040  | 0.962692 |
| <i>Uso1</i>          | chr5:92137937-92202794    | 11.4844  | 11.5963  | 0.0140  | 0.943729 |
| <i>Paqr3</i>         | chr5:97082328-97111596    | 0.9603   | 0.9807   | 0.0304  | 0.873501 |
| <i>Agpat9</i>        | chr5:100845712-100899102  | 0.2604   | 0.2773   | 0.0904  | 0.810406 |

|                      |                          |          |          |         |          |
|----------------------|--------------------------|----------|----------|---------|----------|
| <i>Tmed5</i>         | chr5:108106365-108132620 | 17.1136  | 17.1550  | 0.0035  | 0.974140 |
| <i>Idua</i>          | chr5:108660330-108684557 | 6.7901   | 6.8321   | 0.0089  | 0.945043 |
| <i>Iscu</i>          | chr5:113772747-113778288 | 6.9529   | 7.0718   | 0.0245  | 0.910737 |
| <i>Slc8b1</i>        | chr5:120511167-120534024 | 2.9357   | 2.8243   | -0.0558 | 0.648900 |
| <i>Gtf2ird2</i>      | chr5:134184018-134224355 | 8.5232   | 8.2666   | -0.0441 | 0.614378 |
| <i>Mcm7</i>          | chr5:138164582-138172422 | 19.7739  | 19.2383  | -0.0396 | 0.571219 |
| <i>Get4</i>          | chr5:139252323-139270051 | 6.7023   | 6.4739   | -0.0500 | 0.562248 |
| <i>Tmem184a</i>      | chr5:139802484-139819917 | 1.6746   | 1.6132   | -0.0539 | 0.617264 |
| <i>Fam220a</i>       | chr5:143548707-143564531 | 6.7773   | 6.5461   | -0.0501 | 0.686519 |
| <i>Gm26925</i>       | chr5:144110815-144111772 | 1.6921   | 1.5720   | -0.1062 | 0.584503 |
| <i>Cdk8</i>          | chr5:146231229-146302874 | 8.0541   | 7.8247   | -0.0417 | 0.630906 |
| <i>Tes</i>           | chr6:17065148-17105828   | 55.7294  | 54.0815  | -0.0433 | 0.655379 |
| <i>Ssbp1</i>         | chr6:40471351-40481823   | 9.7211   | 9.7706   | 0.0073  | 0.947201 |
| <i>Rarres2</i>       | chr6:48569697-48572670   | 3.7789   | 3.5408   | -0.0939 | 0.719628 |
| <i>Mrpl19</i>        | chr6:81957850-81965958   | 8.8125   | 8.5487   | -0.0439 | 0.551128 |
| <i>Exoc6b</i>        | chr6:84618486-85069513   | 2.2819   | 2.3043   | 0.0141  | 0.937929 |
| <i>Snrnp27</i>       | chr6:86675220-86684522   | 17.9413  | 18.1238  | 0.0146  | 0.926189 |
| <i>Crbn</i>          | chr6:106778248-106800074 | 48.6714  | 48.8520  | 0.0053  | 0.964119 |
| <i>Tamm41</i>        | chr6:115004380-115037876 | 3.0766   | 3.0965   | 0.0093  | 0.891445 |
| <i>Gm20692</i>       | chr6:120512448-120513232 | 6.7156   | 6.9018   | 0.0395  | 0.856853 |
| <i>Eno2</i>          | chr6:124760052-124769673 | 0.2455   | 0.2586   | 0.0749  | 0.805437 |
| <i>Iffo1</i>         | chr6:125145240-125161782 | 6.3205   | 6.3452   | 0.0056  | 0.953037 |
| <i>Plekhg6</i>       | chr6:125362659-125380793 | 0.2632   | 0.2407   | -0.1286 | 0.777731 |
| <i>Gm26845</i>       | chr6:127108388-127110467 | 0.5987   | 0.6389   | 0.0937  | 0.745945 |
| <i>Tulp3</i>         | chr6:128321139-128355851 | 0.9530   | 0.9120   | -0.0635 | 0.690127 |
| <i>Nrip2</i>         | chr6:128399295-128408932 | 1.5613   | 1.4891   | -0.0683 | 0.725681 |
| <i>Klrb1c</i>        | chr6:128778484-128789215 | 1.8671   | 1.9184   | 0.0391  | 0.908580 |
| <i>Magohb</i>        | chr6:131284387-131293244 | 6.9297   | 7.0139   | 0.0174  | 0.931263 |
| <i>Zfp324</i>        | chr7:12965837-12974236   | 5.3212   | 5.1615   | -0.0440 | 0.587169 |
| <i>Arhgap35</i>      | chr7:16494472-16614993   | 6.2815   | 6.3174   | 0.0082  | 0.953301 |
| <i>Prkd2</i>         | chr7:16842901-16870461   | 50.6651  | 49.1061  | -0.0451 | 0.706996 |
| <i>Pglyrp1</i>       | chr7:18884689-18890438   | 9.4090   | 9.6524   | 0.0368  | 0.893507 |
| <i>Clasrp</i>        | chr7:19581043-19604468   | 19.1589  | 19.2939  | 0.0101  | 0.935671 |
| <i>Relb</i>          | chr7:19606216-19629438   | 10.5947  | 10.2833  | -0.0431 | 0.592197 |
| <i>Smg9</i>          | chr7:24399618-24422778   | 17.2725  | 16.7747  | -0.0422 | 0.701744 |
| <i>Xrcc1</i>         | chr7:24547149-24573438   | 19.5211  | 19.5653  | 0.0033  | 0.968907 |
| <i>Lipe</i>          | chr7:25379526-25398710   | 3.9804   | 3.8398   | -0.0518 | 0.691019 |
| <i>Fbl</i>           | chr7:28169747-28179269   | 3.4896   | 3.6036   | 0.0463  | 0.831377 |
| <i>Zfp788</i>        | chr7:41633202-41651534   | 7.1504   | 6.8907   | -0.0534 | 0.709015 |
| <i>Fuz</i>           | chr7:44896078-44902631   | 11.0209  | 10.7058  | -0.0418 | 0.566784 |
| <i>Prrg2</i>         | chr7:45053612-45062677   | 1.2269   | 1.2747   | 0.0552  | 0.848392 |
| <i>Rcn3</i>          | chr7:45082912-45092221   | 24.3815  | 24.6710  | 0.0170  | 0.929179 |
| <i>Snord35a</i>      | chr7:45126345-45126435   | 24.7011  | 23.1576  | -0.0931 | 0.498698 |
| <i>Emp3</i>          | chr7:45918022-45921426   | 110.0603 | 110.8430 | 0.0102  | 0.947821 |
| <i>Saal1</i>         | chr7:46686107-46710680   | 3.5083   | 3.4024   | -0.0442 | 0.532939 |
| <i>Fes</i>           | chr7:80377757-80387946   | 0.3985   | 0.4229   | 0.0855  | 0.860137 |
| <i>Pde8a</i>         | chr7:81213595-81334533   | 2.4671   | 2.5122   | 0.0261  | 0.890135 |
| <i>Rsf1</i>          | chr7:97579895-97692782   | 12.9275  | 12.5918  | -0.0380 | 0.542731 |
| <i>Mrpl48</i>        | chr7:100545750-100608297 | 3.5797   | 3.4621   | -0.0482 | 0.592802 |
| <i>St5</i>           | chr7:109523910-109617147 | 2.4054   | 2.3101   | -0.0583 | 0.695646 |
| <i>NA</i>            | chr7:110766676-110769345 | 0.3683   | 0.3929   | 0.0934  | 0.776115 |
| <i>Eij4g2</i>        | chr7:111067984-111083030 | 85.7363  | 83.3045  | -0.0415 | 0.684953 |
| <i>Arntl</i>         | chr7:113207464-113314122 | 13.3286  | 13.3688  | 0.0043  | 0.953526 |
| <i>Gm15500</i>       | chr7:114705215-114706235 | 1.2412   | 1.3213   | 0.0903  | 0.839788 |
| <i>Tmem219</i>       | chr7:126886170-126922917 | 9.4996   | 9.5697   | 0.0106  | 0.921742 |
| <i>Sept1</i>         | chr7:127214446-127218498 | 197.7253 | 197.9862 | 0.0019  | 0.984529 |
| <i>Bccip</i>         | chr7:133709332-133721145 | 21.4064  | 21.5504  | 0.0097  | 0.938170 |
| <i>5830411N06Rik</i> | chr7:140247300-140299791 | 0.9370   | 0.8606   | -0.1228 | 0.839826 |
| <i>Lmntd2</i>        | chr7:141210042-141214082 | 2.3813   | 2.2781   | -0.0639 | 0.592083 |
| <i>Dhcr7</i>         | chr7:143823144-143848410 | 3.4564   | 3.4881   | 0.0132  | 0.916881 |
| <i>Pnpla6</i>        | chr8:3515383-3544266     | 9.5603   | 9.6256   | 0.0098  | 0.942279 |
| <i>Cul4a</i>         | chr8:13105620-13147940   | 10.6510  | 10.3682  | -0.0388 | 0.374610 |
| <i>Erich1</i>        | chr8:14027564-14090327   | 13.5733  | 13.1578  | -0.0449 | 0.213849 |
| <i>Ikkkb</i>         | chr8:22659211-22706589   | 19.3837  | 19.3796  | -0.0003 | 0.996154 |
| <i>Gm17484</i>       | chr8:25754508-25769704   | 7.3405   | 7.4204   | 0.0156  | 0.901270 |
| <i>Bag4</i>          | chr8:25764537-25785209   | 8.8179   | 8.5588   | -0.0430 | 0.521637 |
| <i>Wrn</i>           | chr8:33234383-33385527   | 24.3291  | 24.3326  | 0.0002  | 0.997725 |
| <i>Primpol</i>       | chr8:46575578-46617212   | 8.4265   | 8.1871   | -0.0416 | 0.531679 |
| <i>Gm20422</i>       | chr8:69742861-69774886   | 11.8176  | 11.9250  | 0.0131  | 0.883120 |
| <i>Mpv17l2</i>       | chr8:70758648-70760921   | 15.8410  | 16.1054  | 0.0239  | 0.904825 |
| <i>Colgalt1</i>      | chr8:71611023-71624909   | 28.4342  | 27.5377  | -0.0462 | 0.730960 |

|                      |                           |          |          |         |          |
|----------------------|---------------------------|----------|----------|---------|----------|
| <i>0610038B21Rik</i> | chr8:77518114-77523898    | 1.0263   | 0.9546   | -0.1044 | 0.715247 |
| <i>Cnep1r1</i>       | chr8:88118768-88135110    | 8.0624   | 8.0956   | 0.0059  | 0.953800 |
| <i>Exoc3l</i>        | chr8:10528923-105296098   | 1.3775   | 1.4097   | 0.0333  | 0.872792 |
| <i>Smpd3</i>         | chr8:106252547-106337988  | 0.3576   | 0.3756   | 0.0706  | 0.840992 |
| <i>St3gal2</i>       | chr8:110919921-110972480  | 0.6775   | 0.6405   | -0.0811 | 0.711657 |
| <i>Ddx19a</i>        | chr8:110974995-110997800  | 5.4254   | 5.4687   | 0.0115  | 0.930957 |
| <i>Cotl1</i>         | chr8:119809224-119840579  | 319.8462 | 309.0405 | -0.0496 | 0.739170 |
| <i>6430548M08Rik</i> | chr8:120114151-120165306  | 0.1166   | 0.1245   | 0.0944  | 0.719977 |
| <i>Slc7a5</i>        | chr8:121881149-121907694  | 8.0855   | 7.7823   | -0.0551 | 0.775495 |
| <i>NA</i>            | chr9:7836686-7837064      | 5.6512   | 5.2802   | -0.0980 | 0.604595 |
| <i>Usp2</i>          | chr9:44067020-44095627    | 0.6688   | 0.6877   | 0.0403  | 0.836712 |
| <i>Rdx</i>           | chr9:52047149-52088737    | 56.9978  | 55.4131  | -0.0407 | 0.643552 |
| <i>Myo9a</i>         | chr9:59750895-59928866    | 7.2436   | 7.2853   | 0.0083  | 0.949513 |
| <i>Fbxl22</i>        | chr9:66508458-66514593    | 5.6816   | 5.7278   | 0.0117  | 0.926068 |
| <i>Gnb5</i>          | chr9:75311394-75344964    | 0.6620   | 0.6034   | -0.1336 | 0.758649 |
| <i>Gm17324</i>       | chr9:78447864-78448786    | 3.1106   | 2.9193   | -0.0916 | 0.692136 |
| <i>Gm16794</i>       | chr9:95942048-95959393    | 4.9788   | 5.0215   | 0.0123  | 0.923588 |
| <i>Copb2</i>         | chr9:98563730-98588375    | 65.5269  | 65.7266  | 0.0044  | 0.961838 |
| <i>Stag1</i>         | chr9:100597797-100958545  | 18.6936  | 18.7884  | 0.0073  | 0.951086 |
| <i>Gm9917</i>        | chr9:107558809-107568415  | 10.4572  | 10.1554  | -0.0422 | 0.643390 |
| <i>Rbm6</i>          | chr9:107773558-107873237  | 17.8537  | 17.8145  | -0.0032 | 0.941763 |
| <i>Amigo3</i>        | chr9:108053158-108055701  | 5.3625   | 5.1583   | -0.0560 | 0.731947 |
| <i>Slc25a20</i>      | chr9:108662097-108684641  | 16.0275  | 16.0736  | 0.0041  | 0.952528 |
| <i>583046219Rik</i>  | chr9:110372047-110375430  | 7.5299   | 7.2567   | -0.0533 | 0.714931 |
| <i>Ptpn23</i>        | chr9:110385088-110408210  | 2.8006   | 2.6845   | -0.0611 | 0.747924 |
| <i>Kif9</i>          | chr9:110476993-110525179  | 0.4749   | 0.4443   | -0.0962 | 0.769750 |
| <i>Golga4</i>        | chr9:118506317-118582522  | 29.6308  | 28.9435  | -0.0339 | 0.287642 |
| <i>NA</i>            | chr9:124438995-124440899  | 7.0222   | 6.5964   | -0.0902 | 0.705466 |
| <i>Plp2</i>          | chrX:7667940-7671390      | 5.1423   | 5.2386   | 0.0268  | 0.826152 |
| <i>Lamp2</i>         | chrX:38401356-38456454    | 4.7154   | 4.7387   | 0.0071  | 0.954960 |
| <i>Cul4b</i>         | chrX:38533273-38576196    | 20.3459  | 20.3883  | 0.0030  | 0.971887 |
| <i>Aifm1</i>         | chrX:48474943-48513563    | 8.9346   | 8.9586   | 0.0039  | 0.955369 |
| <i>Pcyt1b</i>        | chrX:93654862-93749951    | 0.1553   | 0.1397   | -0.1534 | 0.779381 |
| <i>2810403D21Rik</i> | chrX:108834477-108974906  | 1.3311   | 1.2783   | -0.0584 | 0.621596 |
| <i>Hmgn5</i>         | chrX:109004533-109013404  | 1.6080   | 1.6600   | 0.0459  | 0.884330 |
| <i>Phka2</i>         | chrX:160502165-160598878  | 4.4879   | 4.3178   | -0.0557 | 0.772267 |
| <i>Gm15243</i>       | chrX:160527500-160533045  | 4.6760   | 4.3707   | -0.0974 | 0.529050 |
| <i>Tars</i>          | chr15:11383662-11399658   | 44.9824  | 43.7813  | -0.0390 | 0.509117 |
| <i>Zfp251</i>        | chr15:76852147-76871435   | 17.2340  | 17.2486  | 0.0012  | 0.987032 |
| <i>Sh3bp1</i>        | chr15:78899666-78919032   | 34.8330  | 33.7179  | -0.0469 | 0.713718 |
| <i>Dnajb7</i>        | chr15:81407087-81408273   | 1.0018   | 0.9121   | -0.1353 | 0.707510 |
| <i>NA</i>            | chr15:81857673-81858796   | 8.5142   | 8.6711   | 0.0263  | 0.879662 |
| <i>Serhl</i>         | chr15:83089505-83116674   | 3.8105   | 3.6954   | -0.0442 | 0.573821 |
| <i>Zbed4</i>         | chr15:88751659-88784516   | 1.7298   | 1.7449   | 0.0125  | 0.863475 |
| <i>Gm5475</i>        | chr15:100422146-100428150 | 0.4488   | 0.4699   | 0.0663  | 0.807328 |
| <i>Nr4a1</i>         | chr15:101266845-101274792 | 6.6373   | 6.3671   | -0.0600 | 0.761493 |
| <i>Camk2g</i>        | chr14:20734874-20794088   | 19.2250  | 18.7376  | -0.0370 | 0.553401 |
| <i>A430057M04Rik</i> | chr14:21847577-21856926   | 2.2349   | 2.1426   | -0.0608 | 0.743671 |
| <i>Tkt</i>           | chr14:30548358-30574722   | 45.7603  | 45.7777  | 0.0005  | 0.995295 |
| <i>Wapal</i>         | chr14:34673927-34747983   | 66.1368  | 64.3386  | -0.0398 | 0.625989 |
| <i>Trav13-1</i>      | chr14:53545013-53545521   | 9.8844   | 10.2787  | 0.0564  | 0.884180 |
| <i>Traj37</i>        | chr14:54181517-54181577   | 81.9726  | 84.8036  | 0.0490  | 0.897117 |
| <i>Traj16</i>        | chr14:54203133-54203194   | 39.8075  | 40.9744  | 0.0417  | 0.836946 |
| <i>Zfxh2</i>         | chr14:55060261-55092324   | 1.1219   | 1.1546   | 0.0414  | 0.911113 |
| <i>Dhrs4</i>         | chr14:55478757-55490338   | 9.7680   | 9.3844   | -0.0578 | 0.695649 |
| <i>Mdp1</i>          | chr14:55657878-55660508   | 48.5368  | 47.1926  | -0.0405 | 0.567715 |
| <i>lft88</i>         | chr14:57424061-57517936   | 2.3545   | 2.2512   | -0.0648 | 0.756346 |
| <i>Zdhhc20</i>       | chr14:57832701-57890262   | 62.3691  | 60.7031  | -0.0391 | 0.659515 |
| <i>Pdlim2</i>        | chr14:70164217-70177681   | 13.0037  | 13.0558  | 0.0058  | 0.959708 |
| <i>Gm4285</i>        | chr14:75843378-75844964   | 4.3780   | 4.1626   | -0.0728 | 0.687220 |
| <i>Sugt1</i>         | chr14:79587690-79629755   | 70.4173  | 71.0345  | 0.0126  | 0.937576 |
| <i>Fgfr1op</i>       | chr17:8165500-8196804     | 12.7791  | 12.3791  | -0.0459 | 0.659351 |
| <i>Gm16574</i>       | chr17:12818792-12819537   | 1.4788   | 1.3573   | -0.1236 | 0.709341 |
| <i>Mir5125</i>       | chr17:23823290-23823369   | 14.8782  | 15.8965  | 0.0955  | 0.842117 |
| <i>Tceb2</i>         | chr17:23824739-23829109   | 81.5546  | 78.3566  | -0.0577 | 0.739079 |
| <i>Tbc1d24</i>       | chr17:24175430-24205562   | 0.1731   | 0.1618   | -0.0971 | 0.534598 |
| <i>Eme2</i>          | chr17:24888485-24895087   | 23.1373  | 23.0614  | -0.0047 | 0.926343 |
| <i>lft140</i>        | chr17:25016090-25099495   | 6.2977   | 6.3281   | 0.0069  | 0.946613 |
| <i>Ccdc154</i>       | chr17:25162460-25171913   | 0.2654   | 0.2840   | 0.0976  | 0.812657 |
| <i>Tsr3</i>          | chr17:25240169-25242798   | 31.4376  | 30.5822  | -0.0398 | 0.411043 |
| <i>Fam195a</i>       | chr17:25863697-25868738   | 2.9193   | 2.7560   | -0.0831 | 0.702791 |

|                      |                          |          |          |         |          |
|----------------------|--------------------------|----------|----------|---------|----------|
| <i>Nudt3</i>         | chr17:27579381-27623465  | 35.4941  | 35.7199  | 0.0091  | 0.949536 |
| <i>Zfp523</i>        | chr17:28177206-28205886  | 3.0501   | 3.0984   | 0.0226  | 0.905032 |
| <i>Zfp422-rs1</i>    | chr17:33293836-33305745  | 5.2032   | 5.3079   | 0.0288  | 0.832268 |
| <i>H2-Ke6</i>        | chr17:34026032-34028060  | 62.4431  | 62.7523  | 0.0071  | 0.953760 |
| <i>Zbtb12</i>        | chr17:34879482-34896842  | 1.2918   | 1.3329   | 0.0452  | 0.782573 |
| <i>Lsm2</i>          | chr17:34981861-34985891  | 5.4299   | 5.2268   | -0.0550 | 0.689588 |
| <i>Ddah2</i>         | chr17:35059034-35062095  | 0.6526   | 0.6902   | 0.0809  | 0.755650 |
| <i>Abcf1</i>         | chr17:35956818-35969761  | 35.1726  | 35.3036  | 0.0054  | 0.962709 |
| <i>Z310039H08Rik</i> | chr17:46772634-46773407  | 21.4994  | 21.8530  | 0.0235  | 0.918561 |
| <i>Fem1a</i>         | chr17:56256792-56263608  | 18.8673  | 18.3749  | -0.0382 | 0.455105 |
| <i>Gm26749</i>       | chr17:74575380-74617119  | 30.0156  | 30.0463  | 0.0015  | 0.984431 |
| <i>Galm</i>          | chr17:80127470-80185101  | 2.6683   | 2.7273   | 0.0316  | 0.888779 |
| <i>1110020A21Rik</i> | chr17:84954966-84957710  | 1.8753   | 1.9589   | 0.0629  | 0.820694 |
| <i>Ppp1r21</i>       | chr17:88530123-88588365  | 14.2623  | 13.8356  | -0.0438 | 0.666914 |
| <i>Gm6142</i>        | chr16:4320355-4320680    | 3.2941   | 2.9769   | -0.1461 | 0.798153 |
| <i>Carhsp1</i>       | chr16:8658586-8672153    | 4.9530   | 4.7692   | -0.0545 | 0.684768 |
| <i>Rsl1d1</i>        | chr16:11192969-11203331  | 76.3656  | 76.6699  | 0.0057  | 0.953237 |
| <i>Ercc4</i>         | chr16:13109683-13150617  | 7.4156   | 7.1949   | -0.0436 | 0.673699 |
| <i>Gm15868</i>       | chr16:14311840-14314014  | 11.4223  | 11.6186  | 0.0246  | 0.891949 |
| <i>Hic2</i>          | chr16:17233571-17263430  | 1.2465   | 1.1930   | -0.0633 | 0.784862 |
| <i>Mrpl40</i>        | chr16:18872017-18876767  | 30.5876  | 30.7857  | 0.0093  | 0.939616 |
| <i>Tra2b</i>         | chr16:22244548-22266005  | 26.1761  | 26.2692  | 0.0051  | 0.959472 |
| <i>Atp5j</i>         | chr16:84827865-84835625  | 13.8055  | 13.9128  | 0.0112  | 0.920669 |
| <i>Synj1</i>         | chr16:90936091-91011308  | 6.9273   | 6.9811   | 0.0112  | 0.946710 |
| <i>Runx1</i>         | chr16:92601466-92826066  | 3.3991   | 3.4291   | 0.0127  | 0.931858 |
| <i>Rps6kb2</i>       | chr19:4156712-4163354    | 11.9507  | 11.5733  | -0.0463 | 0.571120 |
| <i>A1837181</i>      | chr19:5425156-5427313    | 32.7629  | 33.0419  | 0.0122  | 0.935360 |
| <i>Fibp</i>          | chr19:5460606-5465052    | 30.1622  | 30.3269  | 0.0079  | 0.944908 |
| <i>Rnaseh2c</i>      | chr19:5601872-5603439    | 31.5278  | 31.7638  | 0.0108  | 0.934997 |
| <i>Naalad1</i>       | chr19:6105781-6115792    | 0.2891   | 0.3079   | 0.0910  | 0.728473 |
| <i>Slc3a2</i>        | chr19:8706881-8723369    | 32.2686  | 31.3713  | -0.0407 | 0.577266 |
| <i>Fth1</i>          | chr19:9982702-9985092    | 130.9670 | 133.0238 | 0.0225  | 0.921698 |
| <i>Erlin1</i>        | chr19:44034943-44069785  | 2.0608   | 1.9767   | -0.0600 | 0.722583 |
| <i>Calhm2</i>        | chr19:47105352-47138294  | 5.2329   | 5.0580   | -0.0490 | 0.689242 |
| <i>Gm16068</i>       | chr19:47606143-47617106  | 2.2157   | 2.0319   | -0.1250 | 0.702193 |
| <i>Arid5a</i>        | chr1:36307732-36324029   | 26.2069  | 25.5148  | -0.0386 | 0.624912 |
| <i>Mitd1</i>         | chr1:37874800-37890411   | 36.3956  | 35.2315  | -0.0469 | 0.705302 |
| <i>Gm3940</i>        | chr1:52090634-52091066   | 2.3461   | 2.5101   | 0.0975  | 0.816068 |
| <i>Gls</i>           | chr1:52163447-52233232   | 28.3867  | 28.4135  | 0.0014  | 0.987010 |
| <i>Gmppa</i>         | chr1:75435929-75443179   | 17.2113  | 17.3242  | 0.0094  | 0.946633 |
| <i>Ccdc93</i>        | chr1:121431048-121506460 | 8.8962   | 8.6670   | -0.0377 | 0.404576 |
| <i>Ddx18</i>         | chr1:121553834-121567989 | 12.3757  | 11.9816  | -0.0467 | 0.559050 |
| <i>Gm26642</i>       | chr1:135248560-135266443 | 4.8329   | 4.8753   | 0.0126  | 0.919585 |
| <i>Scarna3a</i>      | chr1:159340282-159340422 | 10.3530  | 10.9466  | 0.0804  | 0.860531 |
| <i>Cox20</i>         | chr1:178319129-178322693 | 120.2351 | 120.3272 | 0.0011  | 0.987752 |
| <i>Gm15480</i>       | chr1:179538416-179538935 | 3.8923   | 4.0800   | 0.0679  | 0.840115 |
| <i>Gpatch2</i>       | chr1:187215507-187351704 | 8.9049   | 8.9165   | 0.0019  | 0.983537 |
| <i>A130010J15Rik</i> | chr1:193168048-193177832 | 18.5645  | 17.9833  | -0.0459 | 0.676979 |
| <i>Cdc25c</i>        | chr18:34732996-34751533  | 0.5445   | 0.5761   | 0.0815  | 0.762554 |
| <i>Fam53c</i>        | chr18:34758905-34773760  | 5.1470   | 4.9637   | -0.0523 | 0.710584 |
| <i>Hspa9</i>         | chr18:34937413-34954357  | 77.2110  | 75.1751  | -0.0386 | 0.517644 |
| <i>Ndfip1</i>        | chr18:38418974-38464399  | 106.6498 | 103.3751 | -0.0450 | 0.626207 |
| <i>Trim36</i>        | chr18:46165301-46212607  | 0.3464   | 0.3173   | -0.1264 | 0.748385 |
| <i>Prrc1</i>         | chr18:57354732-57392719  | 2.7652   | 2.8152   | 0.0259  | 0.898494 |
| <i>Poli</i>          | chr18:70508679-70530620  | 16.0154  | 16.0032  | -0.0011 | 0.988336 |
| <i>Slc14a1</i>       | chr18:78100090-78142119  | 16.1816  | 15.6954  | -0.0440 | 0.670485 |
| <i>Txn14a</i>        | chr18:80206794-80223533  | 19.0604  | 18.5036  | -0.0428 | 0.660514 |
| <i>Socs6</i>         | chr18:88665223-88927481  | 3.4511   | 3.3414   | -0.0466 | 0.660361 |
| <i>Acdb5</i>         | chr2:23068167-23114510   | 17.5053  | 17.5172  | 0.0010  | 0.985256 |
| <i>Camsap1</i>       | chr2:25926837-25983282   | 4.6280   | 4.4724   | -0.0493 | 0.698296 |
| <i>Ppp6c</i>         | chr2:39194353-39226451   | 20.4810  | 20.5527  | 0.0050  | 0.953235 |
| <i>Ttc30b</i>        | chr2:75935862-75938462   | 1.5523   | 1.4516   | -0.0968 | 0.754280 |
| <i>Gm13680</i>       | chr2:83353156-83353949   | 2.8049   | 2.6016   | -0.1086 | 0.745348 |
| <i>Accs</i>          | chr2:93833466-93849943   | 3.8055   | 3.8141   | 0.0033  | 0.960049 |
| <i>Commd9</i>        | chr2:101886246-101901646 | 7.0000   | 6.6651   | -0.0707 | 0.756792 |
| <i>Imm1p1</i>        | chr2:105904637-105965558 | 10.9540  | 10.4294  | -0.0708 | 0.779004 |
| <i>Scg5</i>          | chr2:113776361-113829121 | 2.2174   | 2.1007   | -0.0780 | 0.688861 |
| <i>Aqr</i>           | chr2:114101169-114187024 | 18.9812  | 18.9588  | -0.0017 | 0.966807 |
| <i>Ccdc32</i>        | chr2:119017778-119029393 | 7.6152   | 7.3350   | -0.0541 | 0.648125 |
| <i>Serf2</i>         | chr2:121449194-121458313 | 23.9853  | 23.2821  | -0.0429 | 0.669736 |
| <i>Mfap1a</i>        | chr2:121491910-121506665 | 8.2746   | 7.9918   | -0.0502 | 0.691639 |

|               |                           |          |          |         |          |
|---------------|---------------------------|----------|----------|---------|----------|
| Gm24451       | chr2:130276236-130276369  | 14.1353  | 12.9961  | -0.1212 | 0.712404 |
| AV099323      | chr2:132253356-132261333  | 1.3713   | 1.2689   | -0.1120 | 0.669337 |
| Esf1          | chr2:140119882-140170564  | 13.9705  | 14.0721  | 0.0105  | 0.939293 |
| Csrp2bp       | chr2:144368982-144407676  | 10.6799  | 10.3742  | -0.0419 | 0.540730 |
| Apmap         | chr2:150583079-150608567  | 19.1845  | 18.5866  | -0.0457 | 0.640528 |
| Fkbp1a        | chr2:151542482-151561692  | 9.3367   | 9.3749   | 0.0059  | 0.930969 |
| Cdk5rap1      | chr2:154335379-154373010  | 7.3990   | 7.6486   | 0.0479  | 0.895981 |
| Edem2         | chr2:155701676-155729475  | 13.6965  | 13.2689  | -0.0458 | 0.657754 |
| Epb4.1l1      | chr2:156420908-156543214  | 0.0943   | 0.0864   | -0.1265 | 0.762471 |
| Gm14230       | chr2:156833048-156839892  | 1.2525   | 1.1589   | -0.1121 | 0.793644 |
| Gm11455       | chr2:164135702-164140419  | 1.7752   | 1.9212   | 0.1140  | 0.836483 |
| 1500012F01Rik | chr2:167062933-167065862  | 37.1294  | 37.3625  | 0.0090  | 0.942253 |
| Slc9a8        | chr2:167421711-167477000  | 8.8548   | 8.5648   | -0.0480 | 0.720989 |
| Tmem189       | chr2:167642607-167689822  | 18.2644  | 17.7622  | -0.0402 | 0.584988 |
| Mtg2          | chr2:180070587-180085902  | 6.8855   | 6.6755   | -0.0447 | 0.596300 |
| Gid8          | chr2:180710116-180718733  | 18.3696  | 17.8417  | -0.0421 | 0.524242 |
| Tpd52         | chr3:8928625-9004723      | 4.1818   | 4.0350   | -0.0515 | 0.714267 |
| 4632415L05Rik | chr3:19894885-19895962    | 8.3224   | 8.0150   | -0.0543 | 0.630588 |
| Larp1b        | chr3:41021938-41040234    | 0.1846   | 0.1967   | 0.0916  | 0.803625 |
| Pfn2          | chr3:57841894-57847564    | 1.4568   | 1.3876   | -0.0702 | 0.712773 |
| Gpr171        | chr3:59096447-59101821    | 59.3705  | 57.5159  | -0.0458 | 0.686141 |
| Slc33a1       | chr3:63933506-63964768    | 11.7965  | 11.4335  | -0.0451 | 0.569290 |
| Plrg1         | chr3:83055521-83072355    | 28.7675  | 28.7497  | -0.0009 | 0.984841 |
| Tsacc         | chr3:88282756-88296999    | 4.4920   | 4.5937   | 0.0323  | 0.892444 |
| Scamp3        | chr3:89177472-89182765    | 31.0863  | 31.2247  | 0.0064  | 0.960773 |
| Dcst1         | chr3:89350218-89365253    | 0.1825   | 0.1972   | 0.1116  | 0.710311 |
| Pbxip1        | chr3:89436705-89450952    | 41.1524  | 41.2823  | 0.0045  | 0.967799 |
| Adar          | chr3:89715021-89753446    | 36.8314  | 36.9103  | 0.0031  | 0.980310 |
| Crtc2         | chr3:90254162-90264125    | 6.1912   | 5.9880   | -0.0482 | 0.724871 |
| Tnfrsf8l2     | chr3:95139520-95142360    | 96.1920  | 93.5419  | -0.0403 | 0.629379 |
| Cdc42se1      | chr3:95228731-95236409    | 149.1426 | 145.3961 | -0.0367 | 0.450746 |
| Anp32e        | chr3:95929245-95947390    | 18.5505  | 18.7048  | 0.0120  | 0.935869 |
| Wars2         | chr3:99141067-99239186    | 3.9238   | 3.8015   | -0.0457 | 0.535874 |
| Wnt2b         | chr3:104944804-104961709  | 0.7351   | 0.7653   | 0.0582  | 0.883258 |
| Gclm          | chr3:122245556-122269984  | 2.7110   | 2.7397   | 0.0152  | 0.907095 |
| Tbck          | chr3:132684143-132838506  | 13.2828  | 13.2856  | 0.0003  | 0.995365 |
| Nol6          | chr4:41114426-41124455    | 13.5203  | 13.5533  | 0.0035  | 0.966979 |
| Creb3         | chr4:43562331-43567060    | 23.8857  | 23.2143  | -0.0411 | 0.497464 |
| Tex10         | chr4:48430857-48473459    | 20.7644  | 20.8474  | 0.0058  | 0.955229 |
| Faf1          | chr4:109676587-109963960  | 16.3140  | 16.3486  | 0.0031  | 0.971176 |
| Gm12961       | chr4:111790620-111791670  | 1.4775   | 1.3790   | -0.0995 | 0.721264 |
| Akr1a1        | chr4:116636509-116651680  | 67.5363  | 65.3464  | -0.0476 | 0.723561 |
| Lck           | chr4:129548343-129573641  | 230.9092 | 224.0291 | -0.0436 | 0.686695 |
| Phactr4       | chr4:132355922-132422489  | 1.4271   | 1.3712   | -0.0577 | 0.667425 |
| Ahdc1         | chr4:133011259-133078110  | 3.2081   | 3.0729   | -0.0621 | 0.810300 |
| Gpn2          | chr4:133584361-133591735  | 10.5224  | 10.1788  | -0.0479 | 0.475621 |
| Pdik1l        | chr4:134275001-134287895  | 10.1947  | 9.8906   | -0.0437 | 0.601664 |
| Tceb3         | chr4:136003367-136021763  | 24.5560  | 23.9507  | -0.0360 | 0.237048 |
| Z310026L22Rik | chr4:138215713-138216189  | 3.9844   | 4.1657   | 0.0642  | 0.712203 |
| Mul1          | chr4:138434670-138442265  | 4.8704   | 4.9021   | 0.0094  | 0.932862 |
| Camk2n1       | chr4:138454313-138460123  | 0.1683   | 0.1814   | 0.1083  | 0.775399 |
| Fbxo44        | chr4:148152799-148160482  | 0.7300   | 0.7512   | 0.0414  | 0.828417 |
| Kcnab2        | chr4:152390741-152477871  | 39.8783  | 38.8487  | -0.0377 | 0.610447 |
| Dffb          | chr4:153964448-153975126  | 10.8191  | 10.4086  | -0.0558 | 0.740493 |
| Prkcz         | chr4:155260128-155361361  | 0.9283   | 0.9439   | 0.0240  | 0.796957 |
| Tmem240       | chr4:155734799-155740564  | 1.1361   | 1.0840   | -0.0677 | 0.734279 |
| Zcchc12       | chrX:36195903-36199158    | 0.3740   | 0.3332   | -0.1669 | 0.807106 |
| A230059L01Rik | chr1:146802964-146806022  | 0.4094   | 0.3192   | -0.3588 | 0.804172 |
| 4933408B17Rik | chr18:34579845-34597468   | 0.4723   | 0.4280   | -0.1421 | 0.795476 |
| Ighg2c        | chr12:113285324-113288930 | 0.8940   | 1.2407   | 0.4728  | 0.717595 |
| Ccdc40        | chr11:119228571-119265236 | 0.2899   | 0.3028   | 0.0626  | 0.839132 |
| Klhdc2        | chr12:69296680-69310687   | 22.0351  | 21.4042  | -0.0419 | 0.665145 |
| Zfml          | chr6:83914352-83986869    | 57.5628  | 55.8834  | -0.0427 | 0.739124 |
| 1810062O18Rik | chr14:20546078-20570687   | 2.3853   | 2.4498   | 0.0385  | 0.800825 |
| Gm15789       | chr1:66783912-66786445    | 1.3396   | 1.2517   | -0.0979 | 0.698061 |
| Ankmy1        | chr1:92870128-92902906    | 0.2765   | 0.2935   | 0.0861  | 0.820489 |
| Tsen15        | chr1:152370734-152386688  | 2.2539   | 2.2977   | 0.0278  | 0.867580 |
| Gpcpd1        | chr2:132529081-132587729  | 28.5455  | 28.6114  | 0.0033  | 0.976540 |
| Sidt2         | chr9:45937856-45955247    | 49.9766  | 48.5311  | -0.0423 | 0.719644 |
| Lats1         | chr10:7681208-7716458     | 13.0268  | 13.0537  | 0.0030  | 0.976134 |
| Gm10827       | chr10:18235052-18238060   | 0.5088   | 0.4734   | -0.1042 | 0.739188 |



|                      |                           |          |          |         |          |
|----------------------|---------------------------|----------|----------|---------|----------|
| <i>Prep</i>          | chr10:45067205-45158997   | 16.0755  | 15.6490  | -0.0388 | 0.517150 |
| <i>Man1a</i>         | chr10:53904787-54075796   | 32.7967  | 32.7488  | -0.0021 | 0.980229 |
| <i>P4ha1</i>         | chr10:59323295-59373304   | 17.6664  | 17.1327  | -0.0443 | 0.765399 |
| <i>Dnajb12</i>       | chr10:59879555-59899302   | 9.1624   | 8.8746   | -0.0460 | 0.718525 |
| <i>Gm4924</i>        | chr10:82378592-82381237   | 1.1947   | 1.2179   | 0.0278  | 0.875786 |
| <i>Zdhhc17</i>       | chr10:110941781-111010066 | 13.9799  | 13.5865  | -0.0412 | 0.652997 |
| <i>NA</i>            | chr10:118860825-118863542 | 17.6776  | 17.2233  | -0.0376 | 0.591816 |
| <i>Agap2</i>         | chr10:127078906-127093169 | 30.8295  | 29.9553  | -0.0415 | 0.725495 |
| <i>8430429K09Rik</i> | chr11:3452364-3479831     | 3.0873   | 2.9814   | -0.0503 | 0.656143 |
| <i>Mtif2</i>         | chr11:29526407-29545279   | 13.0646  | 12.6864  | -0.0424 | 0.722467 |
| <i>Nudcd2</i>        | chr11:40733666-40740046   | 14.6518  | 14.2282  | -0.0423 | 0.599619 |
| <i>N4bp3</i>         | chr11:51643062-51650842   | 5.5757   | 5.6265   | 0.0131  | 0.925312 |
| <i>G3bp1</i>         | chr11:55469684-55504838   | 36.1535  | 36.0566  | -0.0039 | 0.937511 |
| <i>Irgm2</i>         | chr11:58199617-58222779   | 39.9056  | 38.7482  | -0.0425 | 0.729635 |
| <i>Atpaf2</i>        | chr11:60400625-60418457   | 15.5750  | 15.1644  | -0.0385 | 0.424004 |
| <i>Arhgap44</i>      | chr11:65002038-65162961   | 0.2057   | 0.2158   | 0.0692  | 0.869275 |
| <i>Mir3062</i>       | chr11:68990573-68990678   | 10.0904  | 10.6776  | 0.0816  | 0.857682 |
| <i>4931413K12Rik</i> | chr11:75589664-75594771   | 3.4984   | 3.3534   | -0.0611 | 0.736415 |
| <i>Supt6</i>         | chr11:78206745-78245987   | 33.1758  | 32.3309  | -0.0372 | 0.634138 |
| <i>Dhx40</i>         | chr11:86768845-86807696   | 16.6357  | 16.1370  | -0.0439 | 0.679452 |
| <i>Smg8</i>          | chr11:87077731-87086774   | 8.5557   | 8.5649   | 0.0015  | 0.983855 |
| <i>Rnf43</i>         | chr11:87662721-87735539   | 2.3461   | 2.3624   | 0.0100  | 0.941825 |
| <i>Mks1</i>          | chr11:87853214-87863803   | 4.2953   | 4.3184   | 0.0077  | 0.955508 |
| <i>Gm11529</i>       | chr11:96448322-96464547   | 3.1757   | 3.2784   | 0.0459  | 0.842582 |
| <i>Scrn2</i>         | chr11:97029937-97033958   | 4.7608   | 4.7998   | 0.0118  | 0.929858 |
| <i>Stard3</i>        | chr11:98358367-98381112   | 12.5660  | 12.2255  | -0.0396 | 0.587650 |
| <i>Grb7</i>          | chr11:98446393-98455373   | 1.8841   | 1.9067   | 0.0172  | 0.897719 |
| <i>Med24</i>         | chr11:98704590-98729435   | 10.7378  | 10.4419  | -0.0403 | 0.690027 |
| <i>Gm11560</i>       | chr11:99932161-99933109   | 2.0846   | 1.9466   | -0.0988 | 0.841224 |
| <i>Gm26083</i>       | chr11:117077242-117077435 | 109.6880 | 111.7665 | 0.0271  | 0.930302 |
| <i>NA</i>            | chr11:120627680-120628181 | 3.0502   | 2.8607   | -0.0926 | 0.670376 |
| <i>Gm17178</i>       | chr11:120689145-120709447 | 22.7343  | 23.0896  | 0.0224  | 0.912342 |
| <i>L2hgdh</i>        | chr12:69690435-69724874   | 2.2327   | 2.1166   | -0.0770 | 0.806586 |
| <i>Gpr65</i>         | chr12:98268634-98276624   | 34.9346  | 33.7988  | -0.0477 | 0.740451 |
| <i>Efcab11</i>       | chr12:99717530-99883442   | 0.7568   | 0.7087   | -0.0947 | 0.678946 |
| <i>Tdp1</i>          | chr12:99884516-99955219   | 2.7201   | 2.6350   | -0.0459 | 0.679020 |
| <i>Ubr7</i>          | chr12:102757974-102777701 | 25.5325  | 24.8151  | -0.0411 | 0.694050 |
| <i>Ccdc85c</i>       | chr12:108206344-108275417 | 1.1782   | 1.2142   | 0.0435  | 0.876290 |
| <i>Prss16</i>        | chr13:22002175-22009742   | 0.4249   | 0.4494   | 0.0806  | 0.841393 |
| <i>Hist1h2be</i>     | chr13:23583741-23621124   | 3.0223   | 3.0441   | 0.0104  | 0.920568 |
| <i>Hist1h2ac</i>     | chr13:23681466-23683948   | 2.7387   | 2.6306   | -0.0581 | 0.729851 |
| <i>Acot13</i>        | chr13:24817947-24831517   | 26.4082  | 26.6113  | 0.0111  | 0.948827 |
| <i>Prpf4b</i>        | chr13:34875493-34902877   | 97.7678  | 97.6785  | -0.0013 | 0.985958 |
| <i>Eef1e1</i>        | chr13:38645697-38659028   | 26.7845  | 26.9432  | 0.0085  | 0.950349 |
| <i>Gm26064</i>       | chr13:43425741-43425850   | 13.9680  | 14.8062  | 0.0841  | 0.856538 |
| <i>Zfp65</i>         | chr13:67705305-67729119   | 11.0755  | 10.7540  | -0.0425 | 0.691308 |
| <i>Erap1</i>         | chr13:74639871-74691875   | 88.1994  | 88.3827  | 0.0030  | 0.979245 |
| <i>Tmem161b</i>      | chr13:84222295-84295966   | 11.4867  | 11.1452  | -0.0435 | 0.717898 |
| <i>Mast4</i>         | chr13:102732485-103334497 | 0.5101   | 0.4921   | -0.0520 | 0.767719 |
| <i>Dbf4</i>          | chr5:8396972-8422716      | 8.9513   | 8.6936   | -0.0421 | 0.743951 |
| <i>Slc25a40</i>      | chr5:8422849-8454790      | 9.3302   | 9.3587   | 0.0044  | 0.974401 |
| <i>Preb</i>          | chr5:30950852-30960330    | 15.1190  | 14.7487  | -0.0358 | 0.594575 |
| <i>Zfp513</i>        | chr5:31198980-31202303    | 10.7573  | 10.3895  | -0.0502 | 0.741333 |
| <i>Rbpj</i>          | chr5:53555778-53657445    | 4.2828   | 4.1579   | -0.0427 | 0.680963 |
| <i>Mthfd2l</i>       | chr5:90931195-91021360    | 1.1477   | 1.0909   | -0.0732 | 0.571633 |
| <i>Btbd8</i>         | chr5:107437996-107491628  | 0.7433   | 0.6949   | -0.0970 | 0.715170 |
| <i>Tmem175</i>       | chr5:108629769-108647770  | 12.6366  | 12.2759  | -0.0418 | 0.707473 |
| <i>Wsb2</i>          | chr5:117357303-117378601  | 6.1238   | 5.9557   | -0.0401 | 0.634331 |
| <i>2810006K23Rik</i> | chr5:124328088-124341844  | 3.0878   | 2.9739   | -0.0542 | 0.731436 |
| <i>Ttyh3</i>         | chr5:140620585-140649031  | 5.1343   | 5.3048   | 0.0471  | 0.891943 |
| <i>Zdhhc4</i>        | chr5:143316488-143329256  | 11.4320  | 11.0709  | -0.0463 | 0.700506 |
| <i>D130017N08Rik</i> | chr5:143758324-143767130  | 0.7089   | 0.6740   | -0.0730 | 0.771393 |
| <i>Zscan25</i>       | chr5:145283342-145291469  | 10.3217  | 10.3760  | 0.0076  | 0.958307 |
| <i>Brca2</i>         | chr5:150522629-150569746  | 1.9207   | 1.9416   | 0.0156  | 0.953194 |
| <i>Gm13835</i>       | chr6:31141978-31142663    | 3.2763   | 3.3609   | 0.0368  | 0.827493 |
| <i>Nup205</i>        | chr6:35177429-35247590    | 23.9410  | 23.2558  | -0.0419 | 0.698301 |
| <i>1810058I24Rik</i> | chr6:35252653-35263496    | 5.8106   | 5.8635   | 0.0131  | 0.931095 |
| <i>Gng12</i>         | chr6:66896396-67021350    | 0.9730   | 0.9902   | 0.0252  | 0.874924 |
| <i>Gm26628</i>       | chr6:71961144-71963775    | 4.0923   | 3.9442   | -0.0532 | 0.718227 |
| <i>Tgoln1</i>        | chr6:72608431-72617000    | 50.9135  | 50.7436  | -0.0048 | 0.920416 |
| <i>Wbp1</i>          | chr6:83119043-83121559    | 16.3111  | 16.3307  | 0.0017  | 0.984399 |

|                      |                          |          |          |         |          |
|----------------------|--------------------------|----------|----------|---------|----------|
| <i>Spr</i>           | chr6:85133677-85137766   | 15.8748  | 15.3735  | -0.0463 | 0.712077 |
| <i>Gm26636</i>       | chr6:87908842-87914459   | 18.2842  | 17.7663  | -0.0415 | 0.495138 |
| <i>Gm26799</i>       | chr6:112696776-112704668 | 4.3040   | 4.3717   | 0.0225  | 0.905742 |
| <i>NA</i>            | chr6:115675994-115677136 | 10.1397  | 9.7503   | -0.0565 | 0.803544 |
| <i>Rad52</i>         | chr6:119902697-119922828 | 10.7963  | 10.5055  | -0.0394 | 0.542372 |
| <i>Gm15884</i>       | chr6:124715572-124718831 | 33.0339  | 32.1013  | -0.0413 | 0.601790 |
| <i>Dyrk4</i>         | chr6:126876019-126921839 | 0.6294   | 0.6713   | 0.0931  | 0.854977 |
| <i>Zfp524</i>        | chr7:5015500-5018486     | 11.9471  | 11.5643  | -0.0470 | 0.651573 |
| <i>Zfp583</i>        | chr7:6315659-6331285     | 0.9593   | 0.9080   | -0.0792 | 0.780245 |
| <i>Pvr</i>           | chr7:19903577-19921160   | 2.6655   | 2.5778   | -0.0482 | 0.739025 |
| <i>Zfp428</i>        | chr7:24507005-24515682   | 0.9592   | 0.8827   | -0.1199 | 0.831311 |
| <i>NA</i>            | chr7:27984855-27985796   | 4.2412   | 4.3370   | 0.0322  | 0.883473 |
| <i>Ggn</i>           | chr7:29170219-29173933   | 0.4166   | 0.3902   | -0.0945 | 0.768648 |
| <i>E130208F15Rik</i> | chr7:30321739-30323472   | 6.2626   | 6.0270   | -0.0553 | 0.725213 |
| <i>Zfp719</i>        | chr7:43579609-43593235   | 11.0295  | 10.7167  | -0.0415 | 0.638685 |
| <i>Akap13</i>        | chr7:75455533-75754609   | 90.1092  | 90.3290  | 0.0035  | 0.978679 |
| <i>Unc45a</i>        | chr7:80325291-80341005   | 13.5391  | 13.1733  | -0.0395 | 0.601661 |
| <i>Tmem126b</i>      | chr7:90468193-90476001   | 6.6308   | 6.4347   | -0.0433 | 0.650330 |
| <i>Klhl35</i>        | chr7:99466003-99474022   | 1.4990   | 1.5312   | 0.0307  | 0.866255 |
| <i>Rhog</i>          | chr7:102239122-102250123 | 26.4385  | 26.5995  | 0.0088  | 0.946362 |
| <i>Trim21</i>        | chr7:102557921-102565469 | 50.2675  | 48.8120  | -0.0424 | 0.704720 |
| <i>Far1</i>          | chr7:113513833-113571511 | 18.3245  | 18.3348  | 0.0008  | 0.992259 |
| <i>Cln3</i>          | chr7:126571206-126585817 | 10.5763  | 10.2884  | -0.0398 | 0.643701 |
| <i>Pnpla2</i>        | chr7:141455197-141460743 | 11.6224  | 11.2051  | -0.0527 | 0.789930 |
| <i>Zfp958</i>        | chr8:4625839-4629380     | 19.9943  | 19.3241  | -0.0492 | 0.802232 |
| <i>Gm15346</i>       | chr8:22686264-22695646   | 2.0642   | 2.2187   | 0.1041  | 0.858219 |
| <i>Cenpu</i>         | chr8:46552054-46580007   | 5.6155   | 5.6320   | 0.0042  | 0.963826 |
| <i>Gm15717</i>       | chr8:69110470-69111244   | 2.7146   | 2.8767   | 0.0837  | 0.841666 |
| <i>Yjefn3</i>        | chr8:69887787-69902712   | 1.0930   | 1.1731   | 0.1021  | 0.862047 |
| <i>Klhl26</i>        | chr8:70450227-70476943   | 4.9175   | 4.9327   | 0.0044  | 0.960282 |
| <i>Fcho1</i>         | chr8:71708386-71725716   | 30.8822  | 30.8903  | 0.0004  | 0.997229 |
| <i>Klhl36</i>        | chr8:119862304-119876988 | 6.7942   | 6.5744   | -0.0474 | 0.693426 |
| <i>Ankrd11</i>       | chr8:122883336-122974793 | 50.8402  | 49.3958  | -0.0416 | 0.741871 |
| <i>Fdx1l</i>         | chr9:21067519-21073514   | 25.4148  | 25.5464  | 0.0075  | 0.937812 |
| <i>1810026J23Rik</i> | chr9:21592721-21595970   | 10.1049  | 9.8210   | -0.0411 | 0.686073 |
| <i>Nfrkb</i>         | chr9:31386191-31421333   | 18.0986  | 17.6526  | -0.0360 | 0.594857 |
| <i>Tmem218</i>       | chr9:37208332-37223210   | 2.6514   | 2.7202   | 0.0369  | 0.884853 |
| <i>Gm16214</i>       | chr9:42022614-42034113   | 12.4175  | 11.9074  | -0.0605 | 0.786763 |
| <i>AU019823</i>      | chr9:50605239-50617464   | 9.2336   | 8.9830   | -0.0397 | 0.661862 |
| <i>NA</i>            | chr9:88438597-88441187   | 2.6364   | 2.6858   | 0.0268  | 0.923957 |
| <i>Dbr1</i>          | chr9:99575798-99584463   | 14.6153  | 14.6688  | 0.0053  | 0.962542 |
| <i>Atrip</i>         | chr9:109057932-109074124 | 16.3154  | 16.2776  | -0.0033 | 0.964099 |
| <i>Lrrfip2</i>       | chr9:111118110-111225668 | 6.2029   | 6.2274   | 0.0057  | 0.960922 |
| <i>Gpd1l</i>         | chr9:114899340-114933987 | 28.0765  | 27.3305  | -0.0389 | 0.636428 |
| <i>Vipr1</i>         | chr9:121642715-121672954 | 24.9881  | 25.0746  | 0.0050  | 0.970609 |
| <i>Gripap1</i>       | chrX:7789764-7820567     | 12.7872  | 12.7729  | -0.0016 | 0.976504 |
| <i>Otud5</i>         | chrX:7841363-7876626     | 38.2770  | 38.1717  | -0.0040 | 0.949192 |
| <i>Pim2</i>          | chrX:7878261-7883432     | 26.2711  | 26.4047  | 0.0073  | 0.964072 |
| <i>Was</i>           | chrX:8081452-8090498     | 68.6361  | 68.6418  | 0.0001  | 0.998890 |
| <i>Tbc1d25</i>       | chrX:8154471-8176181     | 5.1093   | 5.1528   | 0.0122  | 0.926540 |
| <i>Gm2223</i>        | chrX:33505651-33507010   | 0.7452   | 0.7869   | 0.0786  | 0.831076 |
| <i>Mir5116</i>       | chrX:56587851-56587914   | 15.8782  | 16.7910  | 0.0806  | 0.846484 |
| <i>Fundc2</i>        | chrX:75382398-75396459   | 12.5375  | 12.1319  | -0.0474 | 0.710786 |
| <i>Uprt</i>          | chrX:104482817-104507490 | 5.3950   | 5.4303   | 0.0094  | 0.925529 |
| <i>Mdm4-ps</i>       | chrX:128261410-128267924 | 0.1365   | 0.1259   | -0.1156 | 0.619347 |
| <i>Hccs</i>          | chrX:169250192-169320372 | 7.1433   | 7.1729   | 0.0060  | 0.953983 |
| <i>Cpq</i>           | chr15:33083128-33594552  | 1.4759   | 1.5300   | 0.0520  | 0.920463 |
| <i>Vps13b</i>        | chr15:35371545-35931228  | 29.9933  | 29.9866  | -0.0003 | 0.997375 |
| <i>Ubr5</i>          | chr15:37967327-38078853  | 35.0944  | 34.9456  | -0.0061 | 0.878210 |
| <i>Eif3e</i>         | chr15:43250039-43282736  | 176.2272 | 177.2886 | 0.0087  | 0.955795 |
| <i>Ago2</i>          | chr15:73098591-73184840  | 12.2438  | 12.3612  | 0.0138  | 0.954460 |
| <i>Apol10b</i>       | chr15:77584157-77596125  | 1.7933   | 1.6875   | -0.0877 | 0.811089 |
| <i>Nol12</i>         | chr15:78934932-78943634  | 5.6312   | 5.6538   | 0.0058  | 0.955201 |
| <i>Rarb</i>          | chr14:16430841-16575472  | 3.1472   | 3.0067   | -0.0659 | 0.821439 |
| <i>Mss51</i>         | chr14:20482863-20496901  | 4.5172   | 4.5715   | 0.0173  | 0.922989 |
| <i>Bap1</i>          | chr14:31251488-31259929  | 27.2081  | 27.1727  | -0.0019 | 0.982850 |
| <i>Gm23946</i>       | chr14:32191853-32192050  | 27.3105  | 27.6419  | 0.0174  | 0.932874 |
| <i>Ptger2</i>        | chr14:44988194-45003820  | 2.5272   | 2.5508   | 0.0134  | 0.947535 |
| <i>Trav4-4-dv10</i>  | chr14:53683646-53684176  | 5.0354   | 4.7075   | -0.0971 | 0.703707 |
| <i>Trav16</i>        | chr14:53743103-53743706  | 15.3104  | 15.6411  | 0.0308  | 0.897101 |
| <i>Trdv1</i>         | chr14:53881531-53882216  | 2.4883   | 2.6086   | 0.0681  | 0.825471 |

|               |                          |          |          |         |          |
|---------------|--------------------------|----------|----------|---------|----------|
| Gm20687       | chr14:55056177-55072397  | 1.2659   | 1.3520   | 0.0949  | 0.853251 |
| Wbp4          | chr14:79459936-79481268  | 16.4659  | 16.4563  | -0.0008 | 0.989236 |
| Gm4944        | chr17:22197264-22225614  | 8.7388   | 8.7809   | 0.0069  | 0.959830 |
| Tsc2          | chr17:24595936-24632629  | 9.4769   | 9.1891   | -0.0445 | 0.741751 |
| Nubp2         | chr17:24882610-24886350  | 28.1216  | 28.1556  | 0.0017  | 0.983505 |
| Pigq          | chr17:25926426-25944510  | 6.3369   | 6.3546   | 0.0040  | 0.973877 |
| Btbd9         | chr17:30215523-30576287  | 7.3808   | 7.3725   | -0.0016 | 0.985156 |
| H2-DMB2       | chr17:34143306-34151553  | 0.4951   | 0.5250   | 0.0846  | 0.870113 |
| Prcc2a        | chr17:35149075-35164897  | 18.9961  | 19.1879  | 0.0145  | 0.948377 |
| Lst1          | chr17:35185094-35188439  | 5.9859   | 5.6330   | -0.0877 | 0.659676 |
| Gm22589       | chr17:35242677-35242754  | 14.4291  | 13.2963  | -0.1180 | 0.696024 |
| Enpp5         | chr17:44078812-44086567  | 2.3175   | 2.2425   | -0.0475 | 0.540794 |
| Lonp1         | chr17:56614300-56626903  | 29.0086  | 28.2258  | -0.0395 | 0.664990 |
| Fbxl17        | chr17:63057451-63500017  | 5.9217   | 5.7388   | -0.0453 | 0.751577 |
| Nubp1         | chr16:10411947-10424428  | 18.8967  | 18.3959  | -0.0388 | 0.639278 |
| 4930509G22Rik | chr16:11178175-11192292  | 0.6071   | 0.5715   | -0.0872 | 0.723071 |
| Snx29         | chr16:11322907-11755472  | 2.7144   | 2.7367   | 0.0118  | 0.941922 |
| Dgcr8         | chr16:18253947-18289249  | 13.4818  | 13.4479  | -0.0036 | 0.935003 |
| Hira          | chr16:18877036-18970309  | 8.8720   | 8.6338   | -0.0393 | 0.642710 |
| Gm16618       | chr16:20511132-20517766  | 4.0373   | 3.8421   | -0.0715 | 0.652198 |
| Ptplb         | chr16:35022420-35109175  | 1.3925   | 1.4089   | 0.0169  | 0.840961 |
| Sec22a        | chr16:35311130-35363918  | 4.9518   | 4.8063   | -0.0430 | 0.641659 |
| Ccdc58        | chr16:36071659-36092118  | 11.3347  | 10.9601  | -0.0485 | 0.690157 |
| Hspa13        | chr16:75755189-75766821  | 4.2282   | 4.1021   | -0.0437 | 0.641913 |
| Tiam1         | chr16:89787110-89980080  | 0.7772   | 0.7457   | -0.0598 | 0.801464 |
| Dyrk1a        | chr16:94570009-94695517  | 25.9621  | 25.8603  | -0.0057 | 0.872621 |
| Gm22680       | chr19:8725340-8725409    | 34.7799  | 35.8946  | 0.0455  | 0.890811 |
| Fen1          | chr19:10199131-10204169  | 15.5441  | 15.1057  | -0.0413 | 0.561451 |
| Cutc          | chr19:43752995-43768638  | 5.2695   | 5.3570   | 0.0238  | 0.914631 |
| Sufu          | chr19:46396895-46488804  | 2.4237   | 2.4518   | 0.0166  | 0.930220 |
| Cacul1        | chr19:60524695-60581023  | 17.3833  | 16.9694  | -0.0348 | 0.432228 |
| 2010300C02Rik | chr1:37611676-37720085   | 0.7610   | 0.7846   | 0.0441  | 0.899400 |
| Kdelc1        | chr1:44091462-44118808   | 4.0477   | 3.9144   | -0.0483 | 0.734588 |
| Osgepl1       | chr1:53313623-53326343   | 3.6372   | 3.6468   | 0.0038  | 0.959873 |
| Atic          | chr1:71557149-71579631   | 31.6256  | 31.5870  | -0.0018 | 0.980555 |
| Aamp          | chr1:74279839-74284738   | 60.8718  | 61.2561  | 0.0091  | 0.956978 |
| Tuba4a        | chr1:75214973-75219253   | 74.1244  | 71.8553  | -0.0449 | 0.733177 |
| Mff           | chr1:82724889-82752394   | 20.0643  | 20.1131  | 0.0035  | 0.974108 |
| Arl4c         | chr1:88673124-88702221   | 215.7423 | 215.2998 | -0.0030 | 0.962929 |
| Atg4b         | chr1:93751499-93789434   | 9.5570   | 9.3117   | -0.0375 | 0.547347 |
| Timm17a       | chr1:135301531-135313778 | 17.1062  | 17.2289  | 0.0103  | 0.940833 |
| Mettl13       | chr1:162532126-162548551 | 4.3692   | 4.2501   | -0.0399 | 0.604043 |
| Lbr           | chr1:181815315-181842401 | 130.8726 | 127.7463 | -0.0349 | 0.557875 |
| Ammecr1l      | chr18:31759823-31784071  | 11.5618  | 11.2135  | -0.0441 | 0.720657 |
| Sephs1        | chr2:4881563-4910557     | 9.9355   | 9.9291   | -0.0009 | 0.988691 |
| Arl5b         | chr2:15049394-15082456   | 8.8909   | 8.6355   | -0.0421 | 0.760447 |
| Dnajc1        | chr2:18195653-18392830   | 12.1716  | 12.1280  | -0.0052 | 0.917684 |
| Uap1l1        | chr2:25359888-25365682   | 3.9058   | 3.9163   | 0.0039  | 0.964105 |
| Rpl7a         | chr2:26910763-26913318   | 33.9135  | 32.8817  | -0.0446 | 0.748879 |
| Sardh         | chr2:27188392-27248337   | 0.1394   | 0.1270   | -0.1340 | 0.773496 |
| Fnbp1         | chr2:31026205-31142008   | 20.2023  | 20.2423  | 0.0029  | 0.981006 |
| Snora65       | chr2:32963290-32963420   | 103.9441 | 104.9901 | 0.0144  | 0.935563 |
| Hspa5         | chr2:34771969-34776531   | 107.2690 | 107.5996 | 0.0044  | 0.976943 |
| Dapl1         | chr2:59484652-59505020   | 171.7805 | 162.6348 | -0.0789 | 0.774170 |
| Prkra         | chr2:76629897-76648015   | 1.8889   | 1.8036   | -0.0667 | 0.779264 |
| Dusp19        | chr2:80617044-80632361   | 4.9526   | 4.7982   | -0.0457 | 0.585642 |
| Slc43a1       | chr2:84838849-84863594   | 1.0154   | 0.9608   | -0.0798 | 0.816794 |
| Nr1h3         | chr2:91184060-91202834   | 0.8927   | 0.8447   | -0.0798 | 0.674945 |
| Cd82          | chr2:93419110-93463140   | 45.7402  | 45.6080  | -0.0042 | 0.947606 |
| Catsper2      | chr2:121392630-121413792 | 0.9284   | 0.8818   | -0.0744 | 0.617521 |
| Bloc1s6       | chr2:122738502-122749475 | 9.1225   | 8.8430   | -0.0449 | 0.650724 |
| Tt1           | chr2:129065941-129096283 | 1.4966   | 1.4438   | -0.0518 | 0.557994 |
| Mavs          | chr2:131234062-131248025 | 9.5078   | 9.2349   | -0.0420 | 0.718447 |
| Tmem230       | chr2:132239491-132247807 | 6.1612   | 6.2038   | 0.0100  | 0.936853 |
| Mcm8          | chr2:132816140-132844197 | 1.2120   | 1.1424   | -0.0853 | 0.775014 |
| Mgme1         | chr2:144270662-144281227 | 3.1721   | 3.0574   | -0.0531 | 0.672943 |
| Raly          | chr2:154791095-154867261 | 75.4070  | 73.2799  | -0.0413 | 0.684760 |
| 9230112E08Rik | chr2:180984231-180985591 | 7.1376   | 7.2166   | 0.0159  | 0.909702 |
| Mrps28        | chr3:8802145-8923918     | 17.0039  | 17.2545  | 0.0211  | 0.925138 |
| Car2          | chr3:14886425-14900769   | 3.7875   | 3.6111   | -0.0688 | 0.767325 |
| Msto1         | chr3:88905106-88913999   | 10.5014  | 10.4772  | -0.0033 | 0.908393 |

|                      |                           |          |          |         |          |
|----------------------|---------------------------|----------|----------|---------|----------|
| <i>Arnt</i>          | chr3:95434387-95497240    | 7.7034   | 7.5053   | -0.0376 | 0.583111 |
| <i>Gm20634</i>       | chr3:96245553-96248509    | 0.5219   | 0.4885   | -0.0955 | 0.733699 |
| <i>Acp6</i>          | chr3:97158776-97176574    | 8.8314   | 8.5851   | -0.0408 | 0.721743 |
| <i>Phtf1</i>         | chr3:103968109-104024598  | 13.2622  | 12.9267  | -0.0370 | 0.565267 |
| <i>Magi3</i>         | chr3:104013258-104220374  | 6.2936   | 6.1124   | -0.0421 | 0.653737 |
| <i>Gpsm2</i>         | chr3:108678637-108722187  | 11.2284  | 11.2165  | -0.0015 | 0.977739 |
| <i>Rnpc3</i>         | chr3:113605066-113630149  | 18.4433  | 17.9633  | -0.0380 | 0.645201 |
| <i>Casp6</i>         | chr3:129901424-129914103  | 8.2515   | 7.9705   | -0.0500 | 0.619908 |
| <i>Tspan5</i>        | chr3:138742194-138904433  | 6.1706   | 6.1801   | 0.0022  | 0.974940 |
| <i>Pigk</i>          | chr3:152714099-152980408  | 7.9624   | 7.7413   | -0.0406 | 0.660818 |
| <i>Lyn</i>           | chr4:3678114-3813122      | 0.5546   | 0.5720   | 0.0448  | 0.887017 |
| <i>Aldh1b1</i>       | chr4:45799021-45804604    | 4.9984   | 5.0419   | 0.0125  | 0.942045 |
| <i>Stx17</i>         | chr4:48124914-48186507    | 8.3859   | 8.3933   | 0.0013  | 0.988416 |
| <i>Itgb3bp</i>       | chr4:99765401-99929813    | 4.6957   | 4.7217   | 0.0080  | 0.937220 |
| <i>Foxd2os</i>       | chr4:114909256-114921967  | 1.8270   | 1.7523   | -0.0603 | 0.591328 |
| <i>Tmem39b</i>       | chr4:129676354-129696838  | 2.3493   | 2.2581   | -0.0571 | 0.752861 |
| <i>Shhg12</i>        | chr4:132308677-132311024  | 35.7802  | 34.6660  | -0.0456 | 0.735746 |
| <i>Zfp933</i>        | chr4:147822985-147848366  | 8.9729   | 8.9756   | 0.0004  | 0.994904 |
| <i>Ctstn1</i>        | chr4:149586467-149648899  | 6.4276   | 6.4793   | 0.0116  | 0.949560 |
| <i>Mrpl20</i>        | chr4:155803535-155809776  | 27.5969  | 27.8713  | 0.0143  | 0.935871 |
| <i>Snord4a</i>       | chr11:78181685-78181756   | 14.4942  | 15.2258  | 0.0710  | 0.879769 |
| <i>Xlr4e-ps</i>      | chrX:74944962-74952044    | 1.6336   | 1.4918   | -0.1310 | 0.833558 |
| <i>Trdv2-2</i>       | chr14:53960992-53961599   | 2.9050   | 2.6666   | -0.1235 | 0.795806 |
| <i>Gm6457</i>        | chr18:14570100-14570915   | 0.9166   | 0.8314   | -0.1407 | 0.736016 |
| <i>Cdca8</i>         | chr4:124918464-124939311  | 1.4012   | 1.4288   | 0.0282  | 0.935209 |
| <i>Ptdss2</i>        | chr7:141122381-141157021  | 1.7675   | 1.7057   | -0.0514 | 0.705323 |
| <i>Fut11</i>         | chr14:20694967-20700197   | 11.6897  | 11.3939  | -0.0370 | 0.539300 |
| <i>Atp8a1</i>        | chr5:67618139-67847432    | 9.3360   | 9.3503   | 0.0022  | 0.986681 |
| <i>Psme2b</i>        | chr11:48945353-48946190   | 26.9087  | 26.9892  | 0.0043  | 0.968651 |
| <i>Sqstm1</i>        | chr11:50199365-50210827   | 58.4556  | 58.3565  | -0.0024 | 0.976931 |
| <i>Rapgef6</i>       | chr11:54522846-54699285   | 106.7204 | 106.7548 | 0.0005  | 0.996573 |
| <i>Hist3h2ba</i>     | chr11:58948910-58949532   | 5.3427   | 5.4510   | 0.0289  | 0.881111 |
| <i>Mapk7</i>         | chr11:61488811-61494406   | 5.8525   | 5.8953   | 0.0105  | 0.948995 |
| <i>Zswim7</i>        | chr11:62267223-62281375   | 4.4180   | 4.4940   | 0.0246  | 0.876831 |
| <i>Cox11</i>         | chr11:90638172-90644931   | 7.1539   | 6.8935   | -0.0535 | 0.716958 |
| <i>Arl5c</i>         | chr11:97989577-97996181   | 65.0223  | 64.8472  | -0.0039 | 0.953103 |
| <i>1110002L01Rik</i> | chr12:3403877-3427011     | 6.8252   | 6.6448   | -0.0386 | 0.555616 |
| <i>Fam179b</i>       | chr12:64965741-65022573   | 27.5721  | 26.8966  | -0.0358 | 0.647998 |
| <i>Rps6kl1</i>       | chr12:85135595-85151264   | 1.1676   | 1.1162   | -0.0650 | 0.539691 |
| <i>Gm16085</i>       | chr12:107129680-107132576 | 4.7018   | 4.4469   | -0.0804 | 0.717399 |
| <i>Yy1</i>           | chr12:108792972-108816632 | 43.0377  | 41.9589  | -0.0366 | 0.654769 |
| <i>Exoc2</i>         | chr13:30813918-30974047   | 35.8456  | 34.9917  | -0.0348 | 0.567765 |
| <i>Fam193b</i>       | chr13:55539318-55571120   | 23.0768  | 22.4554  | -0.0394 | 0.735696 |
| <i>Fastkd3</i>       | chr13:68582247-68592279   | 7.5704   | 7.6100   | 0.0075  | 0.944309 |
| <i>Tapt1</i>         | chr5:44175163-44226606    | 55.3910  | 54.0458  | -0.0355 | 0.646906 |
| <i>Rasgef1b</i>      | chr5:99217425-99252927    | 0.3753   | 0.3935   | 0.0686  | 0.892235 |
| <i>Hscb</i>          | chr5:110829069-110839777  | 23.0634  | 23.2166  | 0.0096  | 0.943114 |
| <i>Pot1a</i>         | chr6:25743736-25809246    | 7.4063   | 7.3988   | -0.0015 | 0.982871 |
| <i>Tgfb1</i>         | chr7:25687001-25705077    | 12.2304  | 12.3212  | 0.0107  | 0.953562 |
| <i>Prx</i>           | chr7:27499323-27520214    | 0.2552   | 0.2410   | -0.0831 | 0.754191 |
| <i>Mex3b</i>         | chr7:82867332-82871563    | 10.2444  | 9.9674   | -0.0395 | 0.658177 |
| <i>Zfp668</i>        | chr7:127865169-127876828  | 7.5060   | 7.2748   | -0.0451 | 0.756603 |
| <i>Zbtb44</i>        | chr9:31030643-31075879    | 11.6033  | 11.2911  | -0.0394 | 0.751045 |
| <i>Cnot10</i>        | chr9:114585877-114640200  | 23.5310  | 22.9156  | -0.0382 | 0.679105 |
| <i>Syn1</i>          | chrX:20860510-20921004    | 1.0968   | 1.0480   | -0.0658 | 0.738594 |
| <i>Prdx4</i>         | chrX:155323917-155340754  | 2.4936   | 2.3912   | -0.0605 | 0.694351 |
| <i>Yy2</i>           | chrX:157565946-157598650  | 5.2524   | 5.1104   | -0.0395 | 0.585144 |
| <i>Ppp1r16a</i>      | chr15:76671614-76694919   | 3.8606   | 3.7186   | -0.0540 | 0.746801 |
| <i>Tef</i>           | chr15:81802420-81826861   | 4.9697   | 4.9759   | 0.0018  | 0.981716 |
| <i>Ddhd1</i>         | chr14:45593173-45658143   | 9.3065   | 9.0700   | -0.0371 | 0.630416 |
| <i>Cab39l</i>        | chr14:59440980-59548903   | 25.8378  | 25.1714  | -0.0377 | 0.635151 |
| <i>Mipep</i>         | chr14:60784565-60903610   | 9.0637   | 8.7725   | -0.0471 | 0.721512 |
| <i>Cysltr2</i>       | chr14:73029127-73049114   | 5.8292   | 5.9370   | 0.0264  | 0.944349 |
| <i>Zfp758</i>        | chr17:22361452-22377281   | 19.2858  | 18.6912  | -0.0452 | 0.763757 |
| <i>Bag6</i>          | chr17:35135177-35147322   | 16.3513  | 15.8799  | -0.0422 | 0.757863 |
| <i>Man2a1</i>        | chr17:64600735-64755110   | 25.6070  | 25.6604  | 0.0030  | 0.984151 |
| <i>Lsg1</i>          | chr16:30560493-30587592   | 14.4503  | 14.3947  | -0.0056 | 0.914062 |
| <i>Senp7</i>         | chr16:56075408-56190011   | 17.5189  | 17.4776  | -0.0034 | 0.951171 |
| <i>Neat1</i>         | chr19:5824707-5845478     | 14.3831  | 13.9664  | -0.0424 | 0.775026 |
| <i>Ms4a4d</i>        | chr19:11536800-11558467   | 1.2924   | 1.2189   | -0.0844 | 0.736733 |
| <i>Cbwd1</i>         | chr19:24919915-24961616   | 6.9710   | 7.0168   | 0.0094  | 0.954527 |

|                      |                           |          |          |         |          |
|----------------------|---------------------------|----------|----------|---------|----------|
| <i>Wbp1l</i>         | chr19:46599083-46657389   | 23.0115  | 23.0293  | 0.0011  | 0.992938 |
| <i>Casp8</i>         | chr1:58795373-58847503    | 79.0868  | 77.2096  | -0.0347 | 0.581873 |
| <i>Tmbim1</i>        | chr1:74288246-74305622    | 1.0684   | 1.0313   | -0.0509 | 0.772963 |
| <i>Edem3</i>         | chr1:151755373-151822328  | 19.7945  | 19.2840  | -0.0377 | 0.667687 |
| <i>Cep350</i>        | chr1:155844965-155972890  | 24.2593  | 23.6594  | -0.0361 | 0.703248 |
| <i>Cnst</i>          | chr1:179546369-179627478  | 7.0083   | 6.8372   | -0.0357 | 0.524153 |
| <i>4930570N18Rik</i> | chr1:193203038-193226208  | 11.2454  | 11.4646  | 0.0279  | 0.884517 |
| <i>Kdm3b</i>         | chr18:34777007-34839370   | 21.6990  | 21.6790  | -0.0013 | 0.990100 |
| <i>Spata24</i>       | chr18:35656689-35662186   | 3.0912   | 3.1683   | 0.0355  | 0.905635 |
| <i>Rxra</i>          | chr2:27676439-27762957    | 3.4251   | 3.4526   | 0.0115  | 0.952187 |
| <i>Tor2a</i>         | chr2:32757233-32762244    | 10.8463  | 10.8245  | -0.0029 | 0.958336 |
| <i>Rabgap1</i>       | chr2:37443278-37566454    | 15.1345  | 14.7881  | -0.0334 | 0.434541 |
| <i>A330069E16Rik</i> | chr2:91237145-91238352    | 1.6170   | 1.5209   | -0.0884 | 0.697997 |
| <i>Oip5</i>          | chr2:119609511-119618469  | 1.7416   | 1.6599   | -0.0693 | 0.672920 |
| <i>Ndufaf1</i>       | chr2:119655445-119662827  | 14.0708  | 13.5927  | -0.0499 | 0.722670 |
| <i>Slc23a2</i>       | chr2:132052495-132145108  | 7.7699   | 7.5557   | -0.0403 | 0.713745 |
| <i>Pde7a</i>         | chr3:19223107-19311322    | 49.9642  | 48.7212  | -0.0363 | 0.688025 |
| <i>Rnf115</i>        | chr3:96727610-96791155    | 37.0035  | 36.1056  | -0.0354 | 0.572438 |
| <i>Notch2</i>        | chr3:98013537-98150367    | 13.9313  | 13.4747  | -0.0481 | 0.804673 |
| <i>Man1a2</i>        | chr3:100562207-100685503  | 25.4445  | 24.8223  | -0.0357 | 0.665859 |
| <i>Focad</i>         | chr4:88094628-88411011    | 8.6167   | 8.3863   | -0.0391 | 0.715481 |
| <i>Gm12846</i>       | chr4:98664365-98666137    | 0.6554   | 0.7007   | 0.0964  | 0.891256 |
| <i>Pef1</i>          | chr4:130102557-130128135  | 10.9962  | 10.6655  | -0.0440 | 0.657516 |
| <i>Sf3b5</i>         | chr10:13008449-13009182   | 47.8384  | 46.2592  | -0.0484 | 0.767669 |
| <i>Pex7</i>          | chr10:19859928-19907689   | 7.7374   | 7.7632   | 0.0048  | 0.953547 |
| <i>Hdac2</i>         | chr10:36974543-37001889   | 25.1045  | 25.1601  | 0.0032  | 0.979660 |
| <i>Ugp2</i>          | chr11:21321137-21371201   | 12.2005  | 11.8530  | -0.0417 | 0.704354 |
| <i>Fam228a</i>       | chr12:4713816-4738383     | 0.6175   | 0.6409   | 0.0536  | 0.875878 |
| <i>Gm25821</i>       | chr12:21287926-21288059   | 5.9713   | 5.5055   | -0.1172 | 0.718999 |
| <i>Pygl</i>          | chr12:70190810-70231488   | 0.4483   | 0.4659   | 0.0554  | 0.895614 |
| <i>Gfi1</i>          | chr5:107716656-107726036  | 8.4607   | 8.4913   | 0.0052  | 0.967339 |
| <i>Zfp61</i>         | chr7:24291038-24301232    | 4.3376   | 4.3745   | 0.0122  | 0.953883 |
| <i>Z310010J17Rik</i> | chr7:90124857-90129474    | 11.4995  | 11.7369  | 0.0295  | 0.911172 |
| <i>Gm15774</i>       | chr7:120872691-120875298  | 1.0347   | 0.9793   | -0.0794 | 0.785872 |
| <i>Mri1</i>          | chr8:84249905-84257326    | 18.5361  | 18.0638  | -0.0372 | 0.663870 |
| <i>Zfp653</i>        | chr9:22055459-22071345    | 11.5979  | 11.2530  | -0.0436 | 0.686100 |
| <i>Rp9</i>           | chr9:22448310-22468356    | 69.3402  | 69.6710  | 0.0069  | 0.964147 |
| <i>2210013O21Rik</i> | chrX:153723589-153741264  | 9.8432   | 9.5291   | -0.0468 | 0.583129 |
| <i>Timmdc1</i>       | chr16:38498346-38522663   | 13.4907  | 13.1357  | -0.0385 | 0.357518 |
| <i>Ighmbp2</i>       | chr19:3260923-3283017     | 6.8564   | 6.6475   | -0.0446 | 0.687995 |
| <i>Papss2</i>        | chr19:32620004-32667187   | 0.8832   | 0.8409   | -0.0710 | 0.682676 |
| <i>Dnmbp</i>         | chr19:43847966-43912392   | 3.8717   | 3.8914   | 0.0073  | 0.961449 |
| <i>Trpm7</i>         | chr2:126791564-126876230  | 27.5244  | 27.5142  | -0.0005 | 0.995752 |
| <i>Gm14455</i>       | chr2:172425803-172440560  | 0.5030   | 0.5216   | 0.0522  | 0.864186 |
| <i>Nelfcd</i>        | chr2:174415803-174427502  | 16.2041  | 15.7675  | -0.0394 | 0.656880 |
| <i>S100a13</i>       | chr3:90514434-90524581    | 48.4041  | 48.8146  | 0.0122  | 0.946566 |
| <i>Anp32b</i>        | chr4:46450901-46472657    | 9.4458   | 9.5615   | 0.0176  | 0.942783 |
| <i>Oma1</i>          | chr4:103313811-103371868  | 13.8838  | 13.5062  | -0.0398 | 0.575761 |
| <i>Echdc1</i>        | chr10:29313165-29346661   | 17.7417  | 17.7436  | 0.0002  | 0.998264 |
| <i>Gm4890</i>        | chr8:79295122-79307685    | 2.6755   | 2.7024   | 0.0144  | 0.925782 |
| <i>Lmbrd2</i>        | chr15:9140620-9198318     | 4.1193   | 4.1576   | 0.0134  | 0.951352 |
| <i>Crim1</i>         | chr17:78200247-78376592   | 10.3435  | 10.0849  | -0.0365 | 0.619949 |
| <i>Naca</i>          | chr10:128035345-128048637 | 13.0408  | 13.1578  | 0.0129  | 0.950857 |
| <i>Wdr26</i>         | chr1:181173227-181211552  | 32.1362  | 31.3970  | -0.0336 | 0.623566 |
| <i>Mov10</i>         | chr3:104794835-104818563  | 11.0649  | 11.0698  | 0.0006  | 0.995807 |
| <i>Ppia</i>          | chr11:6415442-6419817     | 16.6261  | 16.1603  | -0.0410 | 0.706262 |
| <i>D930016D06Rik</i> | chr5:104525734-104554211  | 4.9777   | 4.8312   | -0.0431 | 0.751175 |
| <i>Zfp157</i>        | chr5:138441467-138460694  | 5.0704   | 4.9315   | -0.0401 | 0.658306 |
| <i>Smg5</i>          | chr3:88336259-88362337    | 36.3567  | 35.5741  | -0.0314 | 0.314013 |
| <i>A830073O21Rik</i> | chr7:73738892-73740917    | 0.6086   | 0.5693   | -0.0964 | 0.793649 |
| <i>Il17ra</i>        | chr6:120463196-120483727  | 94.3733  | 91.6776  | -0.0418 | 0.776200 |
| <i>Ighj1</i>         | chr12:113429780-113429833 | 16.2044  | 14.9330  | -0.1179 | 0.832493 |
| <i>Ing3</i>          | chr6:21949570-21976038    | 13.1436  | 13.1117  | -0.0035 | 0.947396 |
| <i>Cryl1</i>         | chr14:57275033-57398483   | 5.8988   | 5.9700   | 0.0173  | 0.926324 |
| <i>Pbx3</i>          | chr2:34171456-34373140    | 0.1467   | 0.1371   | -0.0977 | 0.751107 |
| <i>Utp6</i>          | chr11:79932320-79962390   | 20.1845  | 20.1579  | -0.0019 | 0.979922 |
| <i>Smim5</i>         | chr11:115899965-115906269 | 1.0376   | 0.9772   | -0.0865 | 0.672872 |
| <i>Gm20519</i>       | chr9:21533626-21533985    | 2.1000   | 2.2039   | 0.0697  | 0.862101 |
| <i>Fermt3</i>        | chr19:6998957-7019469     | 104.5726 | 101.8095 | -0.0386 | 0.723044 |
| <i>Cry1</i>          | chr10:85131701-85185054   | 13.9633  | 13.6307  | -0.0348 | 0.485011 |
| <i>Abcd4</i>         | chr12:84602530-84617466   | 5.2588   | 5.0670   | -0.0536 | 0.773130 |

|                      |                           |         |         |         |          |
|----------------------|---------------------------|---------|---------|---------|----------|
| <i>Tubgcp5</i>       | chr7:55794147-55831447    | 15.0947 | 15.0686 | -0.0025 | 0.973854 |
| <i>Nme6</i>          | chr9:109832748-109843116  | 1.8860  | 1.9153  | 0.0222  | 0.912359 |
| <i>Mkks</i>          | chr2:136873779-136891389  | 9.0193  | 8.7355  | -0.0461 | 0.793920 |
| <i>Ndufb5</i>        | chr3:32736989-32751566    | 31.1832 | 31.3435 | 0.0074  | 0.963240 |
| <i>Ero1l</i>         | chr14:45283091-45318572   | 7.8787  | 7.6606  | -0.0405 | 0.725012 |
| <i>Gm13609</i>       | chr2:32016643-32017344    | 5.3405  | 5.4839  | 0.0382  | 0.862225 |
| <i>Gm16552</i>       | chr5:121717665-121727403  | 1.2792  | 1.3363  | 0.0630  | 0.864558 |
| <i>Ecd</i>           | chr14:20319858-20348121   | 27.3469 | 26.6777 | -0.0357 | 0.587261 |
| <i>Gm26695</i>       | chr17:23556768-23558313   | 10.9052 | 10.5298 | -0.0505 | 0.770598 |
| <i>Wash</i>          | chr17:66111545-66120503   | 18.8810 | 18.9073 | 0.0020  | 0.987402 |
| <i>Abat</i>          | chr16:8513428-8621568     | 0.2298  | 0.2151  | -0.0954 | 0.824940 |
| <i>Pbx2</i>          | chr17:34591265-34597400   | 15.3406 | 14.9663 | -0.0356 | 0.631955 |
| <i>2810021J22Rik</i> | chr11:58867215-58883288   | 6.1178  | 6.1329  | 0.0036  | 0.977795 |
| <i>Thr6</i>          | chr5:64953105-64960048    | 5.5278  | 5.5594  | 0.0082  | 0.960741 |
| <i>Kpna1</i>         | chr16:35978749-36037131   | 12.2357 | 11.9464 | -0.0345 | 0.593232 |
| <i>Bag2</i>          | chr1:33745483-33757794    | 1.4566  | 1.4794  | 0.0225  | 0.908849 |
| <i>Kctd10</i>        | chr5:114363566-114380515  | 28.9898 | 28.2567 | -0.0370 | 0.682917 |
| <i>Gm5595</i>        | chr7:42660104-42692718    | 0.5716  | 0.5406  | -0.0803 | 0.672932 |
| <i>Trim34b</i>       | chr7:104300229-104336909  | 8.8563  | 8.5642  | -0.0484 | 0.769359 |
| <i>Gypc</i>          | chr18:32528321-32560034   | 8.3813  | 8.4391  | 0.0099  | 0.958759 |
| <i>Gm25363</i>       | chr5:24820592-24820837    | 3.9052  | 4.0355  | 0.0473  | 0.846450 |
| <i>1810034E14Rik</i> | chr13:64248745-64268145   | 14.0180 | 14.0995 | 0.0084  | 0.960865 |
| <i>Herpud1</i>       | chr8:94386437-94395377    | 53.7344 | 52.4008 | -0.0363 | 0.668643 |
| <i>Ehbp11</i>        | chr19:5707375-5726317     | 11.0661 | 10.7983 | -0.0353 | 0.642968 |
| <i>Snord47</i>       | chr1:161038081-161038158  | 79.6910 | 80.9816 | 0.0232  | 0.929278 |
| <i>330002I08Rik</i>  | chr2:150310934-150362765  | 2.1680  | 2.1910  | 0.0152  | 0.939456 |
| <i>Gm12847</i>       | chr4:115818856-115822655  | 4.6663  | 4.4119  | -0.0809 | 0.758113 |
| <i>Mipol1</i>        | chr12:57230426-57497199   | 1.7141  | 1.7190  | 0.0042  | 0.966280 |
| <i>Tmem68</i>        | chr4:3549040-3574853      | 11.2790 | 11.2822 | 0.0004  | 0.996523 |
| <i>Sirt1</i>         | chr10:63319004-63381704   | 14.9523 | 14.5902 | -0.0354 | 0.669659 |
| <i>Cs</i>            | chr10:128337831-128362479 | 64.9935 | 64.7338 | -0.0058 | 0.932596 |
| <i>Icam1</i>         | chr9:21015959-21028797    | 44.2673 | 43.1649 | -0.0364 | 0.701708 |
| <i>Tbc1d2b</i>       | chr9:90202046-90270804    | 14.5433 | 14.1691 | -0.0376 | 0.732166 |
| <i>Ccdc71</i>        | chr9:108460517-108465945  | 17.5211 | 17.4949 | -0.0022 | 0.980485 |
| <i>Zhx1</i>          | chr15:58047002-58076541   | 18.2063 | 18.1983 | -0.0006 | 0.994173 |
| <i>Mocs1</i>         | chr17:49428361-49455435   | 7.4630  | 7.2634  | -0.0391 | 0.542313 |
| <i>Inpp5e</i>        | chr2:26396248-26409203    | 17.3722 | 17.3234 | -0.0041 | 0.955549 |
| <i>Ccdc141</i>       | chr2:77009901-77170636    | 0.1421  | 0.1455  | 0.0337  | 0.915225 |
| <i>Usp48</i>         | chr4:137593754-137658537  | 24.8335 | 24.1923 | -0.0377 | 0.745676 |
| <i>Vps52</i>         | chr17:33955811-33966984   | 15.7614 | 15.3845 | -0.0349 | 0.459138 |
| <i>Snord49b</i>      | chr11:62603078-62603150   | 12.0376 | 11.2207 | -0.1014 | 0.806658 |
| <i>Gm26830</i>       | chr11:95669951-95672719   | 1.3498  | 1.2760  | -0.0810 | 0.772053 |
| <i>Tntt1</i>         | chr7:4504569-4516382      | 1.6460  | 1.6761  | 0.0261  | 0.911441 |
| <i>A730061H03Rik</i> | chr14:55559941-55560406   | 7.1910  | 6.8929  | -0.0611 | 0.813969 |
| <i>Rorc</i>          | chr3:94372793-94398276    | 0.2128  | 0.2251  | 0.0808  | 0.867423 |
| <i>Gm26860</i>       | chr10:42761595-42763635   | 4.1590  | 4.2166  | 0.0198  | 0.930519 |
| <i>Hnrmp3</i>        | chr10:63014663-63024217   | 12.7535 | 12.7528 | -0.0001 | 0.999272 |
| <i>Snord37</i>       | chr10:81178949-81179013   | 18.8002 | 17.6931 | -0.0876 | 0.605898 |
| <i>Mir3057</i>       | chr10:81271596-81271687   | 11.9756 | 11.3146 | -0.0819 | 0.780992 |
| <i>Actr6</i>         | chr10:89711972-89732295   | 18.9954 | 18.4617 | -0.0411 | 0.760125 |
| <i>Poc1b</i>         | chr10:99107035-99198074   | 4.3698  | 4.2471  | -0.0411 | 0.708821 |
| <i>Tbc1d30</i>       | chr10:121263823-121311189 | 0.8320  | 0.8001  | -0.0563 | 0.721076 |
| <i>Xrcc6bp1</i>      | chr10:126868429-126901371 | 3.9545  | 3.9911  | 0.0133  | 0.931366 |
| <i>Bloc1s1</i>       | chr10:128917881-128924035 | 19.4672 | 18.9032 | -0.0424 | 0.725234 |
| <i>Zpbb</i>          | chr11:11279625-11462408   | 2.1549  | 2.1757  | 0.0139  | 0.946931 |
| <i>Psme4</i>         | chr11:30771725-30880361   | 20.8029 | 20.3320 | -0.0330 | 0.646323 |
| <i>Rars</i>          | chr11:35808380-35834506   | 32.3472 | 32.2684 | -0.0035 | 0.960171 |
| <i>Shmt1</i>         | chr11:60788103-60811718   | 7.6093  | 7.6002  | -0.0017 | 0.977323 |
| <i>Kdm6bos</i>       | chr11:69401512-69402700   | 3.3550  | 3.4154  | 0.0258  | 0.911428 |
| <i>Efnb3</i>         | chr11:69554091-69560205   | 0.2468  | 0.2292  | -0.1070 | 0.775539 |
| <i>Slc16a13</i>      | chr11:70216788-70220994   | 2.3156  | 2.2373  | -0.0497 | 0.620458 |
| <i>Snord42a</i>      | chr11:78181298-78181363   | 18.7671 | 19.3827 | 0.0466  | 0.874263 |
| <i>Rffl</i>          | chr11:82802448-82871210   | 9.3731  | 9.3619  | -0.0017 | 0.987071 |
| <i>Psmd3</i>         | chr11:98682553-98695979   | 16.8585 | 16.4240 | -0.0377 | 0.755749 |
| <i>Rdm1</i>          | chr11:101627194-101636100 | 7.6326  | 7.3861  | -0.0474 | 0.747315 |
| <i>Ern1</i>          | chr11:106394649-106487852 | 1.7058  | 1.7174  | 0.0098  | 0.957520 |
| <i>Psmd12</i>        | chr11:107479483-107504362 | 20.7982 | 20.7366 | -0.0043 | 0.954949 |
| <i>Atp5h</i>         | chr11:115415688-115419962 | 49.4593 | 49.4594 | 0.0000  | 0.999999 |
| <i>Sypl</i>          | chr12:32953890-32979050   | 1.2991  | 1.3127  | 0.0150  | 0.952600 |
| <i>Gm20069</i>       | chr12:102612679-102618516 | 28.2320 | 28.4048 | 0.0088  | 0.957482 |
| <i>Papola</i>        | chr12:105784693-105838944 | 38.9791 | 38.0924 | -0.0332 | 0.643342 |

|                      |                           |          |          |         |          |
|----------------------|---------------------------|----------|----------|---------|----------|
| <i>Wdr20</i>         | chr12:110737948-110795028 | 16.6866  | 16.6405  | -0.0040 | 0.949921 |
| <i>Gm11398</i>       | chr13:23620729-23621049   | 3.5637   | 3.3436   | -0.0920 | 0.766217 |
| <i>Gm17364</i>       | chr13:41273802-41273977   | 10.8451  | 11.5233  | 0.0875  | 0.889965 |
| <i>Phf2</i>          | chr13:48801749-48870885   | 11.0837  | 10.7774  | -0.0404 | 0.762605 |
| <i>Gm5141</i>        | chr13:62773607-62777089   | 6.5984   | 6.3879   | -0.0468 | 0.708469 |
| <i>Papd7</i>         | chr13:69497958-69533839   | 5.8648   | 5.8975   | 0.0080  | 0.965513 |
| <i>Arsk</i>          | chr13:76060421-76098660   | 4.0637   | 4.0652   | 0.0006  | 0.995804 |
| <i>Ankrd32</i>       | chr13:77043087-77135473   | 8.0615   | 8.0736   | 0.0022  | 0.988407 |
| <i>Gm25219</i>       | chr5:23487393-23487723    | 22.4858  | 21.7605  | -0.0473 | 0.699043 |
| <i>Hadha</i>         | chr5:30118300-30155162    | 34.7527  | 34.6368  | -0.0048 | 0.948430 |
| <i>Abli2</i>         | chr5:35757879-35884973    | 0.3225   | 0.3301   | 0.0333  | 0.883246 |
| <i>Gm15975</i>       | chr5:55624187-55625593    | 0.6584   | 0.6162   | -0.0957 | 0.738725 |
| <i>Usp46os2</i>      | chr5:74032268-74039996    | 0.7905   | 0.8354   | 0.0797  | 0.861929 |
| <i>Srrd</i>          | chr5:112337391-112343040  | 7.8257   | 7.6012   | -0.0420 | 0.679513 |
| <i>Rbm19</i>         | chr5:120116509-120197979  | 19.0271  | 18.9587  | -0.0052 | 0.921563 |
| <i>Aldh2</i>         | chr5:121566026-121593824  | 0.3267   | 0.3076   | -0.0871 | 0.832525 |
| <i>Gm15842</i>       | chr5:122302421-122303039  | 4.5056   | 4.3209   | -0.0604 | 0.788387 |
| <i>Gigyf1</i>        | chr5:137518879-137527934  | 7.9492   | 7.9860   | 0.0067  | 0.970558 |
| <i>Ppp1r35</i>       | chr5:137778848-137780110  | 15.8623  | 15.9568  | 0.0086  | 0.954590 |
| <i>A430033K04Rik</i> | chr5:138622858-138648903  | 5.2798   | 5.1275   | -0.0422 | 0.755521 |
| <i>5730422E09Rik</i> | chr5:149119564-149184063  | 1.2004   | 1.1394   | -0.0752 | 0.745518 |
| <i>Bet1</i>          | chr6:4076898-4086972      | 5.6920   | 5.7156   | 0.0060  | 0.964455 |
| <i>Ggct</i>          | chr6:54982579-54992950    | 7.3982   | 7.2020   | -0.0388 | 0.602026 |
| <i>Gm20696</i>       | chr6:99257483-99666797    | 17.3853  | 16.8553  | -0.0447 | 0.815407 |
| <i>Cd9</i>           | chr6:125460265-125494791  | 7.5541   | 7.3021   | -0.0490 | 0.769483 |
| <i>Wbp11</i>         | chr6:136813653-136828233  | 12.5950  | 12.5663  | -0.0033 | 0.968459 |
| <i>Pyroxd1</i>       | chr6:142345653-142363257  | 14.4081  | 14.0518  | -0.0361 | 0.656456 |
| <i>Caprin2</i>       | chr6:148842491-148896237  | 1.5846   | 1.5368   | -0.0442 | 0.793171 |
| <i>Map3k10</i>       | chr7:27656374-27674598    | 3.3046   | 3.2050   | -0.0442 | 0.733734 |
| <i>Zfp626</i>        | chr7:27810812-27818669    | 15.4190  | 14.8844  | -0.0509 | 0.808790 |
| <i>NA</i>            | chr7:28399548-28598144    | 3.0286   | 3.0345   | 0.0028  | 0.977232 |
| <i>Hspb6</i>         | chr7:30552177-30555443    | 3.2721   | 3.3036   | 0.0138  | 0.934980 |
| <i>Nr1h2</i>         | chr7:44549615-44553951    | 25.0431  | 24.3896  | -0.0381 | 0.743017 |
| <i>Gm26646</i>       | chr7:79916951-79920606    | 3.3118   | 3.1879   | -0.0550 | 0.706104 |
| <i>Bub3</i>          | chr7:131560390-131571898  | 48.4140  | 48.2997  | -0.0034 | 0.966928 |
| <i>Gm15718</i>       | chr7:132979581-132983552  | 2.6587   | 2.7790   | 0.0638  | 0.871299 |
| <i>Elavl1</i>        | chr8:4284781-4325100      | 15.8267  | 15.4831  | -0.0317 | 0.378036 |
| <i>Gm16725</i>       | chr8:18652800-18678056    | 0.8316   | 0.7790   | -0.0943 | 0.850923 |
| <i>Mboat4</i>        | chr8:34115029-34125185    | 1.3442   | 1.2716   | -0.0801 | 0.763787 |
| <i>Fkbp8</i>         | chr8:70527723-70535328    | 52.9415  | 52.7917  | -0.0041 | 0.966679 |
| <i>Ssbp4</i>         | chr8:70597490-70608314    | 43.7049  | 42.5483  | -0.0387 | 0.754752 |
| <i>Elmo3</i>         | chr8:105305600-105310623  | 5.6114   | 5.4466   | -0.0430 | 0.533033 |
| <i>Tango6</i>        | chr8:106683067-106851439  | 4.1261   | 4.0205   | -0.0374 | 0.625434 |
| <i>Irf2bp2</i>       | chr8:126588295-126593436  | 50.8868  | 49.7181  | -0.0335 | 0.643550 |
| <i>Eif3g</i>         | chr9:20894351-20898600    | 101.9747 | 102.0416 | 0.0009  | 0.994328 |
| <i>Mpzl3</i>         | chr9:45055185-45077436    | 2.4634   | 2.3879   | -0.0449 | 0.676357 |
| <i>Slc6a20b</i>      | chr9:123593819-123632565  | 0.7405   | 0.7134   | -0.0538 | 0.481171 |
| <i>Mtm1</i>          | chrX:71210766-71315691    | 1.3538   | 1.3561   | 0.0024  | 0.980703 |
| <i>Rpl10</i>         | chrX:74270811-74273135    | 25.5983  | 24.9153  | -0.0390 | 0.728153 |
| <i>Slc25a32</i>      | chr15:39094190-39112716   | 14.1552  | 14.1677  | 0.0013  | 0.991246 |
| <i>Pkhd1l1</i>       | chr15:44457552-44597143   | 0.0650   | 0.0677   | 0.0595  | 0.824705 |
| <i>Nsmce2</i>        | chr15:59374197-59601683   | 5.8652   | 5.8807   | 0.0038  | 0.976877 |
| <i>Chrac1</i>        | chr15:73090391-73097554   | 16.1703  | 16.1308  | -0.0035 | 0.971329 |
| <i>Xpnpep3</i>       | chr15:81400137-81456807   | 3.3831   | 3.3830   | 0.0000  | 0.999511 |
| <i>Tcf20</i>         | chr15:82808628-82912134   | 103.4563 | 100.8825 | -0.0363 | 0.714368 |
| <i>Alg12</i>         | chr15:88805243-88819318   | 11.7340  | 11.7516  | 0.0022  | 0.988159 |
| <i>Zcrb1</i>         | chr15:93386096-93398334   | 12.9545  | 12.6255  | -0.0371 | 0.660625 |
| <i>Scaf11</i>        | chr15:96411697-96460843   | 33.4775  | 33.2709  | -0.0089 | 0.766111 |
| <i>Kansl2</i>        | chr15:98518820-98534244   | 4.8487   | 4.8686   | 0.0059  | 0.953658 |
| <i>Atf1</i>          | chr15:100227818-100261244 | 7.0827   | 7.0877   | 0.0010  | 0.990276 |
| <i>Dennd6a</i>       | chr14:26579577-26633394   | 17.3706  | 17.2968  | -0.0061 | 0.869058 |
| <i>Capn7</i>         | chr14:31336637-31371986   | 37.8275  | 37.6636  | -0.0063 | 0.928636 |
| <i>Mphosph8</i>      | chr14:56668247-56697430   | 16.0922  | 15.6895  | -0.0366 | 0.672967 |
| <i>Gtf2f2</i>        | chr14:75896936-76010865   | 24.9416  | 24.9560  | 0.0008  | 0.993914 |
| <i>Acat3</i>         | chr17:12923832-12940402   | 25.6717  | 25.7130  | 0.0023  | 0.986052 |
| <i>2210404O09Rik</i> | chr17:21879569-21908092   | 4.9501   | 4.7816   | -0.0500 | 0.836351 |
| <i>1700022N22Rik</i> | chr17:25985814-25988469   | 1.0347   | 1.0882   | 0.0728  | 0.837482 |
| <i>ltfg3</i>         | chr17:26211821-26244223   | 5.7577   | 5.7846   | 0.0067  | 0.971478 |
| <i>NA</i>            | chr17:30485510-30485963   | 1.7407   | 1.6248   | -0.0994 | 0.765004 |
| <i>Akap8</i>         | chr17:32303675-32321153   | 96.2164  | 95.6369  | -0.0087 | 0.797997 |
| <i>Egfl8</i>         | chr17:34613348-34615971   | 3.1733   | 3.1961   | 0.0103  | 0.948581 |

|                      |                           |         |         |         |          |
|----------------------|---------------------------|---------|---------|---------|----------|
| <i>C4a</i>           | chr17:34809091-34823464   | 0.2107  | 0.2167  | 0.0406  | 0.881438 |
| <i>Cfb</i>           | chr17:34856373-34862518   | 0.5294  | 0.4976  | -0.0893 | 0.755230 |
| <i>Klc4</i>          | chr17:46630630-46645144   | 7.5349  | 7.3198  | -0.0418 | 0.713265 |
| <i>Nmral1</i>        | chr16:4710058-4719356     | 1.2173  | 1.1634  | -0.0653 | 0.757490 |
| <i>Rfc4</i>          | chr16:23113942-23127737   | 12.9394 | 12.5682 | -0.0420 | 0.636190 |
| <i>Mrpl21</i>        | chr19:3282900-3292837     | 15.0961 | 14.6253 | -0.0457 | 0.806804 |
| <i>Ccdc85b</i>       | chr19:5456788-5457397     | 29.1245 | 28.0879 | -0.0523 | 0.837693 |
| <i>Uqcc3</i>         | chr19:8880015-8880933     | 40.4335 | 40.6617 | 0.0081  | 0.966705 |
| <i>Sec31b</i>        | chr19:44516956-44545864   | 2.2259  | 2.1485  | -0.0511 | 0.658044 |
| <i>Ldb1</i>          | chr19:46032592-46045214   | 94.5524 | 94.2412 | -0.0048 | 0.953171 |
| <i>Cuedc2</i>        | chr19:46329811-46338660   | 16.0878 | 15.6481 | -0.0400 | 0.703499 |
| <i>Sfxn2</i>         | chr19:46573364-46596898   | 8.3176  | 8.0735  | -0.0430 | 0.666016 |
| <i>Usmg5</i>         | chr19:47083470-47090625   | 5.8630  | 5.5482  | -0.0796 | 0.855509 |
| <i>Terf1</i>         | chr1:15805657-15843428    | 17.9348 | 17.9707 | 0.0029  | 0.975932 |
| <i>Inpp1</i>         | chr1:52789412-52817688    | 38.5888 | 37.7327 | -0.0324 | 0.482864 |
| <i>Rpe</i>           | chr1:66700830-66719805    | 22.4440 | 22.4689 | 0.0016  | 0.990382 |
| <i>Htr2b</i>         | chr1:86099025-86111970    | 1.9695  | 2.0013  | 0.0231  | 0.907980 |
| <i>Otos</i>          | chr1:92644217-92648841    | 0.3274  | 0.3468  | 0.0829  | 0.866726 |
| <i>Arl8a</i>         | chr1:135146823-135156269  | 6.1140  | 6.1758  | 0.0145  | 0.939207 |
| <i>Cacybp</i>        | chr1:160202366-160212892  | 39.5076 | 38.2947 | -0.0450 | 0.822163 |
| <i>NA</i>            | chr1:193207749-193254474  | 10.2311 | 9.7612  | -0.0678 | 0.800561 |
| <i>Bin1</i>          | chr18:32377216-32435736   | 55.3171 | 53.9729 | -0.0355 | 0.623846 |
| <i>Afg3l2</i>        | chr18:67404766-67449166   | 18.5828 | 18.1489 | -0.0341 | 0.574088 |
| <i>Scarna17</i>      | chr18:74778390-74778469   | 39.0616 | 37.3283 | -0.0655 | 0.768669 |
| <i>Pmpca</i>         | chr2:26389338-26397122    | 25.1608 | 24.6044 | -0.0323 | 0.492682 |
| <i>Lypd6b</i>        | chr2:49787687-49948849    | 14.2218 | 13.8158 | -0.0418 | 0.776162 |
| <i>Gm13548</i>       | chr2:52739070-52739455    | 2.3266  | 2.4157  | 0.0542  | 0.882020 |
| <i>Ganc</i>          | chr2:120403895-120461700  | 8.0124  | 7.9865  | -0.0047 | 0.951592 |
| <i>4930473A02Rik</i> | chr2:130543790-130563749  | 13.3112 | 13.3657 | 0.0059  | 0.965172 |
| <i>A930019D19Rik</i> | chr2:146259285-146267160  | 1.2400  | 1.1696  | -0.0842 | 0.821374 |
| <i>Dsn1</i>          | chr2:156995264-157007154  | 4.8731  | 4.7331  | -0.0421 | 0.754053 |
| <i>Ube2v1</i>        | chr2:167607637-167632095  | 1.6952  | 1.7136  | 0.0155  | 0.922616 |
| <i>Ptpn1</i>         | chr2:167932056-167979385  | 24.8945 | 24.7956 | -0.0057 | 0.925032 |
| <i>Dpm1</i>          | chr2:168209047-168230591  | 8.4474  | 8.4248  | -0.0039 | 0.952918 |
| <i>Pfdn4</i>         | chr2:170496427-170519123  | 7.0351  | 6.8011  | -0.0488 | 0.806212 |
| <i>Gm14295</i>       | chr2:176798611-176811223  | 1.5181  | 1.5381  | 0.0189  | 0.925942 |
| <i>Gm9845</i>        | chr3:39357393-39359128    | 0.5531  | 0.5174  | -0.0963 | 0.640810 |
| <i>Foxo1</i>         | chr3:52268336-52350109    | 19.5826 | 19.5928 | 0.0008  | 0.995849 |
| <i>Slc25a44</i>      | chr3:88410497-88425139    | 12.4012 | 12.1016 | -0.0353 | 0.625015 |
| <i>Slc39a1</i>       | chr3:90248171-90253612    | 9.5551  | 9.2981  | -0.0393 | 0.624129 |
| <i>Dennd2d</i>       | chr3:106482404-106503030  | 90.0388 | 89.6360 | -0.0065 | 0.932249 |
| <i>Cccl1</i>         | chr3:108653912-108678840  | 14.4778 | 14.1287 | -0.0352 | 0.582379 |
| <i>Snora24</i>       | chr3:123507936-123508066  | 36.5007 | 34.9696 | -0.0618 | 0.711910 |
| <i>Meaf6</i>         | chr4:125085133-125113238  | 4.8888  | 4.7660  | -0.0367 | 0.637726 |
| <i>Eif4g3</i>        | chr4:137993021-138208508  | 14.1888 | 14.1890 | 0.0000  | 0.999884 |
| <i>Angpt17</i>       | chr4:148495182-148500460  | 0.7403  | 0.6991  | -0.0826 | 0.858882 |
| <i>Pgd</i>           | chr4:149149990-149166771  | 7.4889  | 7.3038  | -0.0361 | 0.640672 |
| <i>Nron</i>          | chr2:33805815-33813591    | 0.1975  | 0.2068  | 0.0667  | 0.858426 |
| <i>Ddx31</i>         | chr2:28840405-28905571    | 14.8377 | 14.4919 | -0.0340 | 0.569127 |
| <i>Angpt16</i>       | chr9:20873808-20879727    | 7.1898  | 6.9346  | -0.0521 | 0.772379 |
| <i>Mir1839</i>       | chr7:81529854-81529981    | 13.5556 | 12.7216 | -0.0916 | 0.808641 |
| <i>Tirap</i>         | chr9:35184550-35200291    | 1.0555  | 1.0691  | 0.0185  | 0.932886 |
| <i>Gm21986</i>       | chrX:101295838-101321348  | 4.4918  | 4.5085  | 0.0054  | 0.974421 |
| <i>Card6</i>         | chr15:5095980-5108539     | 6.9455  | 6.9375  | -0.0017 | 0.984981 |
| <i>Clybl</i>         | chr14:122181693-122402232 | 8.2497  | 7.9901  | -0.0461 | 0.780733 |
| <i>Thada</i>         | chr17:84190055-84466196   | 22.5962 | 22.5267 | -0.0044 | 0.959669 |
| <i>Gm16152</i>       | chr1:38384948-38393974    | 1.6235  | 1.5481  | -0.0686 | 0.810081 |
| <i>Rps6kc1</i>       | chr1:190700201-190911770  | 2.6414  | 2.5773  | -0.0354 | 0.555937 |
| <i>Pla2g12a</i>      | chr3:129878621-129895821  | 6.5959  | 6.6175  | 0.0047  | 0.964812 |
| <i>Sf3a3</i>         | chr4:124714775-124732460  | 31.2753 | 30.5068 | -0.0359 | 0.689178 |
| <i>Z310011J03Rik</i> | chr10:80318253-80320537   | 23.2230 | 22.5727 | -0.0410 | 0.763836 |
| <i>Hk2</i>           | chr6:82725024-82774454    | 1.1085  | 1.1187  | 0.0132  | 0.937302 |
| <i>Egln3</i>         | chr12:54178980-54203860   | 1.2601  | 1.2018  | -0.0683 | 0.832646 |
| <i>Neurl4</i>        | chr11:69901071-69913820   | 14.6246 | 14.5818 | -0.0042 | 0.964930 |
| <i>Ptrh2</i>         | chr11:86683984-86692457   | 9.9331  | 9.6587  | -0.0404 | 0.704922 |
| <i>Nt5c3</i>         | chr6:56882399-56923932    | 14.3504 | 14.3022 | -0.0049 | 0.947445 |
| <i>Zfp426</i>        | chr9:20468548-20492746    | 11.2409 | 11.2380 | -0.0004 | 0.997519 |
| <i>4930483K19Rik</i> | chr10:76545870-76562226   | 1.4927  | 1.4198  | -0.0723 | 0.787482 |
| <i>Parppb</i>        | chr10:88091431-88146941   | 1.1970  | 1.1431  | -0.0665 | 0.832147 |
| <i>Scyl2</i>         | chr10:89638720-89686285   | 8.1681  | 8.1324  | -0.0063 | 0.895365 |
| <i>Dtx3</i>          | chr10:127190377-127195728 | 13.0826 | 13.0687 | -0.0015 | 0.987976 |



|               |                           |          |          |         |          |
|---------------|---------------------------|----------|----------|---------|----------|
| Gm11948       | chr11:3353572-3354911     | 2.1919   | 2.0478   | -0.0981 | 0.825286 |
| Zfp879        | chr11:50832030-50841552   | 0.4851   | 0.4552   | -0.0918 | 0.814215 |
| Z310033P09Rik | chr11:59208320-59210738   | 18.4210  | 18.4325  | 0.0009  | 0.994758 |
| Trim37        | chr11:87127076-87220683   | 6.1280   | 6.1080   | -0.0047 | 0.954009 |
| Itga3         | chr11:95044473-95076801   | 0.2697   | 0.2564   | -0.0730 | 0.737976 |
| Gm11539       | chr11:96248632-96249189   | 2.4424   | 2.3142   | -0.0778 | 0.783393 |
| Hdac5         | chr11:102194431-102230166 | 4.7442   | 4.7443   | 0.0000  | 0.999925 |
| Ccdc146       | chr5:21292960-21424677    | 0.2098   | 0.2190   | 0.0625  | 0.877681 |
| Paxip1        | chr5:27740666-27791339    | 9.4417   | 9.4139   | -0.0043 | 0.955845 |
| D5ErtD579e    | chr5:36584877-36696024    | 7.9546   | 7.7699   | -0.0339 | 0.680142 |
| Enoph1        | chr5:100039993-100068762  | 11.6300  | 11.6279  | -0.0003 | 0.997696 |
| Zfp326        | chr5:105876564-105915818  | 4.3219   | 4.3202   | -0.0006 | 0.996133 |
| Brdt          | chr5:107331158-107387058  | 0.3837   | 0.3918   | 0.0302  | 0.918317 |
| Gm20499       | chr5:114809035-114823460  | 10.5497  | 10.1390  | -0.0573 | 0.825822 |
| Cops7a        | chr6:124958412-124965538  | 13.2501  | 12.9270  | -0.0356 | 0.607609 |
| Ccdc97        | chr7:25711105-25719088    | 6.2091   | 6.0260   | -0.0432 | 0.798357 |
| Wdr62         | chr7:30240137-30280419    | 0.6536   | 0.6655   | 0.0259  | 0.914502 |
| Etfb          | chr7:43444107-43457800    | 16.3843  | 15.9274  | -0.0408 | 0.653264 |
| Z410002F23Rik | chr7:44246721-44262720    | 19.0399  | 18.9364  | -0.0079 | 0.913825 |
| Tead2         | chr7:45215752-45233635    | 0.6932   | 0.7037   | 0.0217  | 0.876980 |
| Nucb1         | chr7:45492873-45510406    | 16.8788  | 16.4419  | -0.0378 | 0.757500 |
| Ctsc          | chr7:88278084-88310888    | 30.1405  | 30.0123  | -0.0061 | 0.930652 |
| Trim12c       | chr7:104338753-104353362  | 37.9572  | 36.8401  | -0.0431 | 0.797504 |
| Tnrc6a        | chr7:123123884-123195288  | 29.6152  | 28.9889  | -0.0308 | 0.621693 |
| Pex11g        | chr8:3457104-3467680      | 5.7840   | 5.7755   | -0.0021 | 0.983156 |
| Tmem161a      | chr8:70172355-70183681    | 8.6469   | 8.3956   | -0.0425 | 0.758624 |
| St14          | chr9:31089401-31131853    | 0.2188   | 0.2296   | 0.0696  | 0.916941 |
| Klhdc8b       | chr9:108447657-108452377  | 0.7441   | 0.7031   | -0.0817 | 0.803399 |
| Gm4784        | chrX:109388743-109392165  | 0.6098   | 0.5710   | -0.0948 | 0.818604 |
| Oc90          | chr15:65876052-65912397   | 0.4238   | 0.4413   | 0.0586  | 0.850997 |
| Ripk3         | chr14:55784995-55788857   | 20.8494  | 20.3096  | -0.0378 | 0.682953 |
| Fance         | chr17:28313529-28326568   | 5.8826   | 5.7198   | -0.0405 | 0.674182 |
| Gm26858       | chr17:32369304-32378445   | 1.9440   | 1.8747   | -0.0524 | 0.749426 |
| Pot1b         | chr17:55652024-55712628   | 11.3880  | 11.3605  | -0.0035 | 0.958985 |
| Wdr53         | chr16:32247226-32257083   | 9.3165   | 9.0539   | -0.0412 | 0.596553 |
| Iqcb1         | chr16:36828384-36872721   | 1.5252   | 1.4687   | -0.0545 | 0.818330 |
| Gm16538       | chr19:5727205-5731627     | 7.3083   | 7.0112   | -0.0599 | 0.766530 |
| Rom1          | chr19:8927381-8929356     | 13.5609  | 13.5906  | 0.0031  | 0.980463 |
| Gm23722       | chr1:39573745-39573875    | 11.0383  | 11.4014  | 0.0467  | 0.856398 |
| Nck2          | chr1:43445750-43570515    | 10.9730  | 10.9956  | 0.0030  | 0.982400 |
| Gpr21         | chr2:37516331-37520603    | 1.1427   | 1.1557   | 0.0163  | 0.914400 |
| Rif1          | chr2:52072836-52122383    | 34.7706  | 34.7068  | -0.0026 | 0.979557 |
| Gm9821        | chr2:91945702-91947655    | 5.3489   | 5.4171   | 0.0183  | 0.953179 |
| Slc30a4       | chr2:122681232-122702663  | 13.6319  | 13.2919  | -0.0364 | 0.767689 |
| Gm14048       | chr2:130880865-130882133  | 2.7531   | 2.7900   | 0.0192  | 0.885172 |
| Eif2s2        | chr2:154871409-154892935  | 10.0332  | 10.0202  | -0.0019 | 0.986017 |
| Gcnt7         | chr2:172450312-172458596  | 5.0715   | 4.9195   | -0.0439 | 0.743204 |
| Gm15444       | chr3:96209626-96220168    | 7.4123   | 7.5665   | 0.0297  | 0.897744 |
| Igsf3         | chr3:101377124-101463060  | 0.9647   | 0.9691   | 0.0066  | 0.972559 |
| Gtf2b         | chr3:142765225-142783603  | 38.2270  | 37.2120  | -0.0388 | 0.713710 |
| Cdc26         | chr4:62383653-62408642    | 3.6457   | 3.6418   | -0.0015 | 0.978583 |
| Uqcrh         | chr4:116066964-116075071  | 129.8751 | 131.9287 | 0.0226  | 0.925611 |
| Wasf2         | chr4:133130504-133199756  | 14.8154  | 14.8004  | -0.0015 | 0.990926 |
| Gm10509       | chr17:21690765-21691024   | 4.2658   | 4.4090   | 0.0476  | 0.910366 |
| Gm13039       | chr4:143166602-143167396  | 1.0302   | 0.9380   | -0.1353 | 0.838665 |
| Ptbp1         | chr10:79854426-79864771   | 46.9488  | 45.8929  | -0.0328 | 0.647779 |
| Rnasek        | chr11:70238123-70239842   | 14.8141  | 14.9712  | 0.0152  | 0.949457 |
| Nmt1          | chr11:103028189-103068912 | 21.4122  | 21.2813  | -0.0089 | 0.841166 |
| Hist1h4c      | chr13:23698059-23698454   | 153.3718 | 148.7643 | -0.0440 | 0.821743 |
| Evi5l         | chr8:4166566-4211257      | 1.4591   | 1.4189   | -0.0403 | 0.780034 |
| Agpat6        | chr8:23172945-23208453    | 19.6981  | 19.2435  | -0.0337 | 0.652255 |
| Nacc1         | chr8:84670482-84687862    | 10.5751  | 10.3203  | -0.0352 | 0.729077 |
| Btd           | chr14:31641027-31668579   | 6.5107   | 6.5336   | 0.0051  | 0.975949 |
| Sorbs1        | chr19:40295048-40402267   | 2.5024   | 2.5331   | 0.0176  | 0.948705 |
| Hnrnpu        | chr1:178323073-178337797  | 165.0589 | 163.9252 | -0.0099 | 0.757111 |
| Fbxo3         | chr2:104027720-104063240  | 13.6368  | 13.3434  | -0.0314 | 0.521731 |
| Csnk1g2       | chr10:80622779-80640771   | 80.2492  | 80.0733  | -0.0032 | 0.978663 |
| Ptpn9         | chr9:56994967-57062805    | 5.0104   | 4.8735   | -0.0399 | 0.687164 |
| Lbh           | chr17:72918304-72941942   | 67.2639  | 67.0706  | -0.0042 | 0.966376 |
| MacroD1       | chr19:7056767-7198061     | 6.3595   | 6.4012   | 0.0094  | 0.939627 |
| Ppp1r7        | chr1:93342853-93373489    | 5.0474   | 5.0355   | -0.0034 | 0.972179 |

|                      |                           |          |          |         |          |
|----------------------|---------------------------|----------|----------|---------|----------|
| <i>Paip2</i>         | chr18:35598616-35617186   | 65.1104  | 65.2357  | 0.0028  | 0.985704 |
| <i>Snx5</i>          | chr2:144250122-144270906  | 68.2230  | 67.9381  | -0.0060 | 0.940028 |
| <i>Rnf11</i>         | chr4:109451097-109484728  | 6.4085   | 6.4122   | 0.0008  | 0.994286 |
| <i>Cops3</i>         | chr11:59817794-59839838   | 27.1084  | 26.4806  | -0.0338 | 0.673916 |
| <i>Ccdc137</i>       | chr11:120458114-120464358 | 9.9781   | 9.9361   | -0.0061 | 0.901614 |
| <i>Prkag2os2</i>     | chr5:24873543-24875934    | 3.7432   | 3.8018   | 0.0224  | 0.930406 |
| <i>Rps19</i>         | chr7:24884370-24889806    | 72.2963  | 70.0926  | -0.0447 | 0.832290 |
| <i>Lysmd4</i>        | chr7:67222543-67228468    | 2.9333   | 2.9387   | 0.0026  | 0.985631 |
| <i>Lat</i>           | chr7:126363831-126369543  | 354.6531 | 346.3655 | -0.0341 | 0.709796 |
| <i>Pomk</i>          | chr8:25980603-25994121    | 5.0402   | 5.0263   | -0.0040 | 0.962262 |
| <i>Rbmx1</i>         | chr8:78505270-78508928    | 4.0362   | 4.0666   | 0.0108  | 0.939846 |
| <i>Rad23a</i>        | chr8:84834018-84840665    | 40.7052  | 40.5717  | -0.0047 | 0.958124 |
| <i>Agrp</i>          | chr8:105566699-105568298  | 2.0258   | 2.0842   | 0.0410  | 0.877320 |
| <i>Rab26os</i>       | chr17:24528247-24528744   | 14.5809  | 14.0579  | -0.0527 | 0.815454 |
| <i>Rpl36</i>         | chr17:56613394-56614243   | 15.2603  | 15.3953  | 0.0127  | 0.960271 |
| <i>B130034C11Rik</i> | chr16:87495998-87504033   | 1.7890   | 1.7288   | -0.0494 | 0.575067 |
| <i>Ckap5</i>         | chr2:91526761-91620664    | 18.6393  | 18.5484  | -0.0071 | 0.926792 |
| <i>Spata2</i>        | chr2:167481132-167492887  | 4.7932   | 4.6650   | -0.0391 | 0.759433 |
| <i>Casz1</i>         | chr4:14880428-148954889   | 0.6328   | 0.6111   | -0.0504 | 0.766510 |
| <i>N6amt1</i>        | chr16:87354184-87368742   | 3.9094   | 3.7976   | -0.0418 | 0.737606 |
| <i>Rnf146</i>        | chr10:29344177-29362442   | 25.5063  | 24.9679  | -0.0308 | 0.573040 |
| <i>Lims1</i>         | chr10:58323465-58424691   | 46.1671  | 45.9229  | -0.0077 | 0.901899 |
| <i>Bcr</i>           | chr10:75060895-75184923   | 4.5356   | 4.4191   | -0.0376 | 0.773002 |
| <i>Cstb</i>          | chr10:78425669-78427619   | 25.2295  | 24.2811  | -0.0553 | 0.848263 |
| <i>Cnn2</i>          | chr10:79988583-79996062   | 317.8300 | 317.4425 | -0.0018 | 0.989129 |
| <i>Tcf3</i>          | chr10:80409513-80433647   | 20.3802  | 19.8573  | -0.0375 | 0.779795 |
| <i>Mterf2</i>        | chr10:85119434-85128027   | 14.5971  | 14.2128  | -0.0385 | 0.693299 |
| <i>Gm25117</i>       | chr10:111481492-111481636 | 45.2828  | 45.7544  | 0.0149  | 0.964187 |
| <i>Cnot8</i>         | chr11:58104152-58118594   | 28.9087  | 28.2933  | -0.0310 | 0.620007 |
| <i>Gid4</i>          | chr11:60417144-60450927   | 12.6781  | 12.3923  | -0.0329 | 0.679100 |
| <i>Trappc1</i>       | chr11:69323979-69325793   | 18.2766  | 18.2636  | -0.0010 | 0.993612 |
| <i>Nufip2</i>        | chr11:77686154-77741921   | 51.2715  | 51.1276  | -0.0041 | 0.966784 |
| <i>Gm11604</i>       | chr11:98185365-98186107   | 2.0022   | 2.0576   | 0.0393  | 0.904124 |
| <i>Kat2a</i>         | chr11:100704745-100712465 | 15.9611  | 15.9062  | -0.0050 | 0.962119 |
| <i>Rab37</i>         | chr11:115091430-115162236 | 14.8295  | 14.7674  | -0.0061 | 0.950182 |
| <i>Grb2</i>          | chr11:115644044-115708597 | 12.6748  | 12.6387  | -0.0041 | 0.961713 |
| <i>Galk1</i>         | chr11:116008456-116012719 | 17.2974  | 16.7916  | -0.0428 | 0.783579 |
| <i>Tk1</i>           | chr11:117815525-117826092 | 1.7561   | 1.6983   | -0.0483 | 0.825024 |
| <i>Asxl2</i>         | chr12:3426856-3506852     | 13.9635  | 13.9117  | -0.0054 | 0.956350 |
| <i>Sptssa</i>        | chr12:54645373-54656572   | 30.3020  | 29.4775  | -0.0398 | 0.806643 |
| <i>Ctage5</i>        | chr12:59129719-59191583   | 18.1176  | 17.7295  | -0.0312 | 0.671484 |
| <i>Arf6</i>          | chr12:69372149-69375979   | 115.7023 | 113.1175 | -0.0326 | 0.700858 |
| <i>Dhrs7</i>         | chr12:72650355-72664828   | 20.4925  | 20.4132  | -0.0056 | 0.932182 |
| <i>Wdr89</i>         | chr12:75630593-75669537   | 7.6629   | 7.6474   | -0.0029 | 0.978059 |
| <i>Gstz1</i>         | chr12:87147706-87164721   | 8.9222   | 8.6756   | -0.0404 | 0.611853 |
| <i>Gm26764</i>       | chr12:87332487-87335655   | 1.2882   | 1.2362   | -0.0594 | 0.772506 |
| <i>Gm6863</i>        | chr12:96922419-96923061   | 15.2740  | 15.4225  | 0.0140  | 0.954044 |
| <i>Ripk1</i>         | chr13:34002362-34035170   | 25.2942  | 25.1300  | -0.0094 | 0.761156 |
| <i>Bicd2</i>         | chr13:49341548-49387025   | 13.8314  | 13.5292  | -0.0319 | 0.612949 |
| <i>Cep72</i>         | chr13:74036494-74062285   | 3.2671   | 3.1565   | -0.0497 | 0.802844 |
| <i>Tbca</i>          | chr13:94788942-94842899   | 48.5841  | 48.9262  | 0.0101  | 0.965890 |
| <i>NA</i>            | chr13:109954108-109955963 | 7.9463   | 7.9740   | 0.0050  | 0.975466 |
| <i>Rab28</i>         | chr5:41624975-41708155    | 10.2519  | 10.2829  | 0.0044  | 0.976973 |
| <i>Gm2986</i>        | chr5:93195797-93196179    | 3.9762   | 3.7392   | -0.0887 | 0.847532 |
| <i>Antxr2</i>        | chr5:97882782-98030733    | 11.1044  | 10.8428  | -0.0344 | 0.647361 |
| <i>Chek2</i>         | chr5:110840016-110874133  | 5.2276   | 5.2342   | 0.0018  | 0.990398 |
| <i>Ncf1</i>          | chr5:134220052-134229625  | 21.6720  | 21.6224  | -0.0033 | 0.980396 |
| <i>Fam3c</i>         | chr6:22306519-22356243    | 29.6670  | 29.0232  | -0.0317 | 0.583852 |
| <i>Zfp212</i>        | chr6:47920475-47932639    | 9.4996   | 9.4708   | -0.0044 | 0.960600 |
| <i>Zfp777</i>        | chr6:48024187-48048911    | 15.0579  | 15.0180  | -0.0038 | 0.969685 |
| <i>Nagk</i>          | chr6:83794981-83803420    | 3.8751   | 3.7669   | -0.0409 | 0.721303 |
| <i>Art4</i>          | chr6:136848450-136857733  | 7.8290   | 7.6152   | -0.0400 | 0.797192 |
| <i>Zfp444</i>        | chr7:6172225-6191349      | 5.1762   | 5.1834   | 0.0020  | 0.984301 |
| <i>Il4i1</i>         | chr7:44816369-44840809    | 1.5001   | 1.4544   | -0.0446 | 0.726336 |
| <i>Ipo7</i>          | chr7:110018424-110055114  | 55.1757  | 53.9473  | -0.0325 | 0.658913 |
| <i>Tbc1d10b</i>      | chr7:127197464-127208468  | 17.5405  | 17.1006  | -0.0366 | 0.770567 |
| <i>Tnt3</i>          | chr7:142498835-142516009  | 3.0898   | 2.9790   | -0.0527 | 0.756974 |
| <i>Tmem192</i>       | chr8:64947184-64969034    | 15.3073  | 15.3287  | 0.0020  | 0.988018 |
| <i>1700030K09Rik</i> | chr8:72443879-72461001    | 3.3709   | 3.2725   | -0.0427 | 0.700477 |
| <i>Cherp</i>         | chr8:72460488-72475233    | 7.6845   | 7.4614   | -0.0425 | 0.821818 |
| <i>Trmt1</i>         | chr8:84686306-84699808    | 16.4269  | 16.0686  | -0.0318 | 0.548547 |

|               |                          |          |          |         |          |
|---------------|--------------------------|----------|----------|---------|----------|
| Vps4a         | chr8:107031221-107045755 | 32.7138  | 32.5584  | -0.0069 | 0.890777 |
| Gabarapl2     | chr8:111940702-111953612 | 4.4424   | 4.4453   | 0.0009  | 0.994024 |
| Gm20406       | chr8:121806414-121807369 | 6.6289   | 6.3731   | -0.0568 | 0.744753 |
| Cyba          | chr8:122424771-122432940 | 156.9797 | 156.8804 | -0.0009 | 0.995220 |
| Bcl9l         | chr9:44499135-44510388   | 6.7570   | 6.8054   | 0.0103  | 0.970690 |
| Map2k5        | chr9:63163768-63377902   | 13.6813  | 13.3336  | -0.0371 | 0.726203 |
| Parp16        | chr9:65214689-65239219   | 2.0727   | 1.9997   | -0.0517 | 0.835489 |
| Oaz2          | chr9:65668000-65690300   | 3.2235   | 3.2402   | 0.0074  | 0.951985 |
| Phip          | chr9:82866158-82975489   | 38.7292  | 38.5930  | -0.0051 | 0.957913 |
| Pxylp1        | chr9:96823343-96892669   | 5.0285   | 5.0128   | -0.0045 | 0.956313 |
| Manf          | chr9:106838311-106891979 | 20.1925  | 19.7107  | -0.0348 | 0.724897 |
| Hemk1         | chr9:107327691-107338350 | 1.8168   | 1.7529   | -0.0517 | 0.780413 |
| Araf          | chrX:20797813-20860519   | 19.2535  | 18.8117  | -0.0335 | 0.709865 |
| Dock11        | chrX:35888831-36076562   | 81.1680  | 79.3291  | -0.0331 | 0.740588 |
| Irak1         | chrX:74013913-74023918   | 23.5629  | 23.4829  | -0.0049 | 0.966315 |
| Gdi1          | chrX:74304997-74311862   | 27.8736  | 27.7076  | -0.0086 | 0.898021 |
| Prrg1         | chrX:78449612-78583896   | 1.5274   | 1.4810   | -0.0445 | 0.790566 |
| Foxred2       | chr15:77940521-77956722  | 1.8832   | 1.8974   | 0.0108  | 0.963496 |
| Cyb5r3        | chr15:83153493-83172592  | 8.5395   | 8.5634   | 0.0040  | 0.983441 |
| Sco2          | chr15:89371638-89373818  | 23.5241  | 23.4674  | -0.0035 | 0.975840 |
| Gm16046       | chr17:13675661-13683516  | 0.9171   | 0.9496   | 0.0503  | 0.890419 |
| Gnptg         | chr17:25233330-25240124  | 28.5845  | 27.8857  | -0.0357 | 0.688305 |
| Decr2         | chr17:26081210-26090329  | 4.4650   | 4.3288   | -0.0447 | 0.791865 |
| B230354K17Rik | chr17:45433851-45442544  | 4.9207   | 4.9324   | 0.0034  | 0.984901 |
| Z510009E07Rik | chr16:21649044-21694665  | 1.2931   | 1.2509   | -0.0478 | 0.753826 |
| 1300002E11Rik | chr16:21794346-21809037  | 6.4708   | 6.4653   | -0.0012 | 0.991909 |
| Ubxn7         | chr16:32332251-32393747  | 20.1059  | 19.9743  | -0.0095 | 0.742374 |
| Cryz1         | chr16:91689321-91728975  | 5.3165   | 5.1786   | -0.0379 | 0.688865 |
| C2cd2         | chr16:97855209-97922633  | 3.3580   | 3.2764   | -0.0355 | 0.646359 |
| Zbtb21        | chr16:97947434-97962621  | 6.4789   | 6.3309   | -0.0333 | 0.630267 |
| Carns1        | chr19:4164323-4175479    | 6.9248   | 6.9268   | 0.0004  | 0.997397 |
| Cyb561a3      | chr19:10577453-10588548  | 11.5086  | 11.5052  | -0.0004 | 0.997112 |
| Gm15959       | chr19:60815448-60815816  | 2.5431   | 2.3917   | -0.0886 | 0.829312 |
| Ttll4         | chr1:74661744-74701832   | 11.6307  | 11.3695  | -0.0328 | 0.722182 |
| C430014B12Rik | chr1:82691927-82725117   | 5.4016   | 5.4890   | 0.0231  | 0.945653 |
| NA            | chr1:137932040-137933296 | 1.4129   | 1.3414   | -0.0749 | 0.782626 |
| Acbd3         | chr1:180726042-180754203 | 22.4132  | 21.9318  | -0.0313 | 0.628855 |
| Tatdn3        | chr1:191045825-191062932 | 4.5997   | 4.4699   | -0.0413 | 0.702385 |
| Esco1         | chr18:10566601-10610352  | 33.4040  | 33.3495  | -0.0024 | 0.983649 |
| Srp19         | chr18:34330846-34336599  | 14.9656  | 14.5717  | -0.0385 | 0.768990 |
| Gm6542        | chr18:36609957-36610729  | 4.5520   | 4.3722   | -0.0581 | 0.814838 |
| Tor4a         | chr2:25192965-25196886   | 42.3591  | 41.3829  | -0.0336 | 0.668171 |
| Edf1          | chr2:25557846-25562082   | 53.6645  | 52.0465  | -0.0442 | 0.832420 |
| O610009E02Rik | chr2:26445695-26459390   | 9.4001   | 9.0874   | -0.0488 | 0.852050 |
| Eng           | chr2:32646594-32682669   | 2.8755   | 2.7899   | -0.0436 | 0.801805 |
| Gm13436       | chr2:36807807-36808425   | 99.1443  | 99.7468  | 0.0087  | 0.971241 |
| Scai          | chr2:39066213-39190730   | 9.7449   | 9.5192   | -0.0338 | 0.765218 |
| Gm13561       | chr2:62357070-62470913   | 4.3152   | 4.3316   | 0.0055  | 0.971627 |
| Mtch2         | chr2:90847154-90866810   | 9.7874   | 9.5683   | -0.0327 | 0.571860 |
| Arl14ep       | chr2:106962526-106974424 | 10.5256  | 10.2778  | -0.0344 | 0.623628 |
| Lrrc57        | chr2:120604237-120609520 | 9.2638   | 9.0241   | -0.0378 | 0.659050 |
| Cdc25b        | chr2:131186948-131198497 | 21.2625  | 20.6907  | -0.0393 | 0.806595 |
| Psmf1         | chr2:151715811-151744186 | 6.2948   | 6.1531   | -0.0328 | 0.671538 |
| Sema4a        | chr3:88435958-88461182   | 35.5098  | 34.5937  | -0.0377 | 0.789454 |
| 4930481B07Rik | chr3:95015624-95020138   | 3.6616   | 3.7007   | 0.0153  | 0.944187 |
| Gm20633       | chr3:96243549-96246380   | 2.7685   | 2.6822   | -0.0457 | 0.822101 |
| Hadh          | chr3:131233418-131272101 | 7.6988   | 7.5137   | -0.0351 | 0.676855 |
| NA            | chr4:32243732-32246475   | 6.1412   | 6.1723   | 0.0073  | 0.971746 |
| D630039A03Rik | chr4:57908482-57916297   | 0.4188   | 0.3953   | -0.0834 | 0.762586 |
| Tctex1d4      | chr4:117126793-117128738 | 1.4882   | 1.5251   | 0.0353  | 0.931936 |
| Fhl3          | chr4:124700700-124708611 | 3.8388   | 3.7145   | -0.0475 | 0.741711 |
| Trnau1ap      | chr4:132311762-132329538 | 12.0337  | 11.7347  | -0.0363 | 0.641679 |
| Pafah2        | chr4:134396319-134427413 | 0.7773   | 0.7858   | 0.0156  | 0.922221 |
| Z510039O18Rik | chr4:147940894-147947314 | 39.7632  | 38.8879  | -0.0321 | 0.669322 |
| NA            | chr10:7792522-7792822    | 3.7280   | 3.4848   | -0.0973 | 0.833494 |
| Mir22hg       | chr11:75461538-75466676  | 0.4502   | 0.4167   | -0.1115 | 0.791917 |
| Zfp64         | chr2:168893330-168955587 | 5.5749   | 5.4399   | -0.0353 | 0.762715 |
| Gm4799        | chr10:82954343-82955000  | 2.2183   | 2.1131   | -0.0701 | 0.733639 |
| 1500009L16Rik | chr10:83722864-83762761  | 0.8785   | 0.9034   | 0.0403  | 0.928999 |
| Timm22        | chr11:76406951-76416292  | 6.3673   | 6.1984   | -0.0388 | 0.668908 |
| Tom1l1        | chr11:90643464-90688366  | 2.5780   | 2.5782   | 0.0001  | 0.999505 |

|                       |                           |          |          |         |          |
|-----------------------|---------------------------|----------|----------|---------|----------|
| <i>Lasp1</i>          | chr11:97798999-97838764   | 22.8072  | 22.3409  | -0.0298 | 0.596046 |
| <i>Pum2</i>           | chr12:8674133-8752581     | 46.7486  | 46.5443  | -0.0063 | 0.949465 |
| <i>Hist1h2ab</i>      | chr13:23751087-23751593   | 9.6983   | 9.8502   | 0.0224  | 0.966162 |
| <i>Thoc3</i>          | chr13:54458836-54468849   | 17.6557  | 17.5772  | -0.0064 | 0.937412 |
| <i>Dok3</i>           | chr13:55523234-55528538   | 1.0341   | 0.9828   | -0.0735 | 0.659117 |
| <i>Scamp1</i>         | chr13:94201309-94285857   | 0.4867   | 0.4655   | -0.0642 | 0.790745 |
| <i>Gatad1</i>         | chr5:3632931-3647934      | 13.2618  | 12.9639  | -0.0328 | 0.635802 |
| <i>Apbb2</i>          | chr5:66298860-66618828    | 0.1327   | 0.1359   | 0.0343  | 0.935451 |
| <i>Plod3</i>          | chr5:136987018-136996648  | 2.9198   | 2.9283   | 0.0042  | 0.980241 |
| <i>Dqx1</i>           | chr6:83057843-83067210    | 2.1697   | 2.1072   | -0.0422 | 0.763180 |
| <i>Slc25a18</i>       | chr6:120773767-120793982  | 2.6254   | 2.6375   | 0.0066  | 0.963540 |
| <i>Kif22</i>          | chr7:127027731-127042420  | 7.1082   | 6.9113   | -0.0405 | 0.768207 |
| <i>Snora52</i>        | chr7:141448802-141448939  | 31.8226  | 32.0769  | 0.0115  | 0.914615 |
| <i>Tubgcp3</i>        | chr8:12614276-12672248    | 16.4792  | 16.3748  | -0.0092 | 0.848145 |
| <i>Dctn6</i>          | chr8:34090419-34108796    | 19.5812  | 19.1274  | -0.0338 | 0.713230 |
| <i>2610044O15Rik8</i> | chr8:129217723-129221950  | 13.2983  | 12.6992  | -0.0665 | 0.798296 |
| <i>Hyou1</i>          | chr9:44379489-44392369    | 16.2918  | 15.9197  | -0.0333 | 0.677600 |
| <i>Spg21</i>          | chr9:65460936-65488470    | 23.3304  | 23.2564  | -0.0046 | 0.960357 |
| <i>Snx22</i>          | chr9:66065175-66069731    | 60.6069  | 60.5103  | -0.0023 | 0.986393 |
| <i>Ogt</i>            | chrX:101640059-101684351  | 77.4152  | 77.3019  | -0.0021 | 0.989031 |
| <i>E230001N04Rik</i>  | chr17:28523256-28525347   | 6.4271   | 6.4206   | -0.0015 | 0.986534 |
| <i>Fbxo36</i>         | chr1:84839840-84900487    | 0.3429   | 0.3216   | -0.0927 | 0.862281 |
| <i>B930036N10Rik</i>  | chr1:171500567-171504111  | 3.9889   | 4.0389   | 0.0180  | 0.960277 |
| <i>Trp53bp2</i>       | chr1:182409171-182462432  | 7.7252   | 7.6985   | -0.0050 | 0.948259 |
| <i>Tnfrif8</i>        | chr18:49979426-50107173   | 11.2752  | 11.2678  | -0.0009 | 0.994880 |
| <i>Mbp</i>            | chr18:82475145-82585637   | 31.4527  | 30.7806  | -0.0312 | 0.701859 |
| <i>Fam102a</i>        | chr2:32535331-32569756    | 31.0960  | 30.3231  | -0.0363 | 0.802150 |
| <i>Mvb12b</i>         | chr2:33729952-33887946    | 3.0927   | 3.0974   | 0.0022  | 0.990051 |
| <i>Slc35c1</i>        | chr2:92452763-92460538    | 13.7924  | 13.4546  | -0.0358 | 0.786775 |
| <i>Haus2</i>          | chr2:120609382-120621560  | 7.5926   | 7.3900   | -0.0390 | 0.747812 |
| <i>Shc4</i>           | chr2:125627446-125724148  | 1.3263   | 1.3381   | 0.0127  | 0.960122 |
| <i>Gss</i>            | chr2:155563180-155592810  | 2.5239   | 2.5249   | 0.0006  | 0.995520 |
| <i>Glimp</i>          | chr3:88325022-88331313    | 9.0081   | 8.8111   | -0.0319 | 0.624202 |
| <i>Gm20632</i>        | chr3:96239392-96241819    | 1.4036   | 1.3461   | -0.0603 | 0.870163 |
| <i>Pdlim5</i>         | chr3:142239585-142395696  | 14.5147  | 14.2110  | -0.0305 | 0.577955 |
| <i>Mob3b</i>          | chr4:34949073-35157484    | 0.9604   | 0.9692   | 0.0132  | 0.948301 |
| <i>Cntnap1</i>        | chr11:101170522-101190724 | 0.2575   | 0.2623   | 0.0265  | 0.903901 |
| <i>Polrmt</i>         | chr10:79736122-79746581   | 8.0903   | 7.9060   | -0.0332 | 0.733347 |
| <i>Jarid2</i>         | chr13:44729473-44921643   | 13.8652  | 13.5824  | -0.0297 | 0.444959 |
| <i>Mafk</i>           | chr5:139791512-139802653  | 17.7029  | 17.3146  | -0.0320 | 0.692882 |
| <i>Zfp141</i>         | chr7:42473385-42505726    | 12.1329  | 11.8560  | -0.0333 | 0.674277 |
| <i>Slc44a2</i>        | chr9:21337827-21355025    | 147.4782 | 144.1449 | -0.0330 | 0.741662 |
| <i>Gm10658</i>        | chr9:57056629-57071966    | 0.9849   | 0.9993   | 0.0210  | 0.924418 |
| <i>Entpd7</i>         | chr19:43689671-43733697   | 0.8379   | 0.8428   | 0.0083  | 0.968051 |
| <i>Ankrd50</i>        | chr3:38449260-38484844    | 7.2286   | 7.1853   | -0.0087 | 0.866450 |
| <i>Uck1</i>           | chr2:32255001-32260159    | 8.5092   | 8.2849   | -0.0385 | 0.688074 |
| <i>Bcap29</i>         | chr12:31595353-31634658   | 12.0320  | 12.0035  | -0.0034 | 0.979856 |
| <i>Gm5424</i>         | chr10:62071014-62072609   | 0.7012   | 0.6624   | -0.0821 | 0.879524 |
| <i>9530068E07Rik</i>  | chr11:52396427-52408728   | 20.4495  | 20.3126  | -0.0097 | 0.864424 |
| <i>Wsb1</i>           | chr11:79239371-79254671   | 20.0690  | 19.9811  | -0.0063 | 0.936859 |
| <i>Usp32</i>          | chr11:84984441-85140161   | 12.2828  | 12.2218  | -0.0072 | 0.924102 |
| <i>Spag9</i>          | chr11:93996090-94126085   | 17.9781  | 17.6002  | -0.0306 | 0.713705 |
| <i>Atp5g1</i>         | chr11:96068851-96075670   | 1.5166   | 1.4651   | -0.0498 | 0.815012 |
| <i>Smardc2</i>        | chr11:106263178-106272972 | 57.0879  | 55.8786  | -0.0309 | 0.634292 |
| <i>Ckb</i>            | chr12:111669354-111672338 | 0.7171   | 0.6812   | -0.0741 | 0.874201 |
| <i>Larp4b</i>         | chr13:9093904-9173086     | 41.6175  | 40.7884  | -0.0290 | 0.551127 |
| <i>Srek1</i>          | chr13:103741614-103764504 | 22.5130  | 22.0680  | -0.0288 | 0.458656 |
| <i>Ccdc92</i>         | chr5:124834417-124862424  | 2.5258   | 2.4393   | -0.0502 | 0.866670 |
| <i>Ccdc174</i>        | chr6:91878052-91899843    | 7.4186   | 7.3981   | -0.0040 | 0.964512 |
| <i>Rbmx2</i>          | chrX:48695003-48710723    | 4.8268   | 4.8425   | 0.0047  | 0.979630 |
| <i>Trav15-2-dv6-2</i> | chr14:53649386-53649993   | 2.4580   | 2.5120   | 0.0314  | 0.883979 |
| <i>Cramp1l</i>        | chr17:24961227-25015230   | 5.7850   | 5.6360   | -0.0376 | 0.820827 |
| <i>Slc41a1</i>        | chr1:131827492-131848865  | 9.1343   | 9.1043   | -0.0047 | 0.966032 |
| <i>Gm20490</i>        | chr2:173022502-173022956  | 49.5586  | 48.1504  | -0.0416 | 0.812485 |
| <i>Lysmd1</i>         | chr3:95134087-95139518    | 3.6333   | 3.6492   | 0.0063  | 0.957417 |
| <i>Traj3</i>          | chr14:54217291-54217357   | 76.1711  | 72.9466  | -0.0624 | 0.876484 |
| <i>Nudt13</i>         | chr14:20294689-20317575   | 4.0606   | 3.9402   | -0.0434 | 0.716513 |
| <i>Ipcef1</i>         | chr10:6885795-7052478     | 56.3625  | 56.0089  | -0.0091 | 0.899741 |
| <i>Gm1972</i>         | chr10:22224279-22253819   | 1.0576   | 1.0828   | 0.0339  | 0.878334 |
| <i>Col18a1</i>        | chr10:77052177-77166548   | 0.1508   | 0.1541   | 0.0315  | 0.927138 |
| <i>Btbd2</i>          | chr10:80642616-80657071   | 6.9507   | 6.9399   | -0.0022 | 0.987068 |

|                      |                           |          |          |         |          |
|----------------------|---------------------------|----------|----------|---------|----------|
| <i>Eml6</i>          | chr11:29743047-30026033   | 0.2742   | 0.2609   | -0.0714 | 0.815694 |
| <i>Zfp354c</i>       | chr11:50811085-50827724   | 4.7870   | 4.7858   | -0.0004 | 0.997735 |
| <i>Snap47</i>        | chr11:59407133-59451186   | 6.4962   | 6.3199   | -0.0397 | 0.767824 |
| <i>Rai1</i>          | chr11:60105012-60199197   | 7.5504   | 7.5399   | -0.0020 | 0.990333 |
| <i>Mbtd1</i>         | chr11:93885851-93946985   | 5.1748   | 5.1587   | -0.0045 | 0.967359 |
| <i>Gm11574</i>       | chr11:97048690-97051432   | 12.0648  | 11.7157  | -0.0424 | 0.784962 |
| <i>Mlx</i>           | chr11:101087276-101092207 | 32.7703  | 32.0624  | -0.0315 | 0.629645 |
| <i>Gm11342</i>       | chr13:24336269-24337343   | 3.6939   | 3.5525   | -0.0563 | 0.862334 |
| <i>Gmds</i>          | chr13:31819578-32338712   | 2.7653   | 2.6814   | -0.0444 | 0.803875 |
| <i>Ftsj2</i>         | chr5:140327673-140331898  | 4.8250   | 4.6741   | -0.0459 | 0.750255 |
| <i>Cep41</i>         | chr6:30653456-30693749    | 3.3040   | 3.2167   | -0.0386 | 0.645824 |
| <i>Dcp1b</i>         | chr6:119175251-119221614  | 7.6933   | 7.6460   | -0.0089 | 0.894409 |
| <i>Alpk3</i>         | chr7:81057599-81105612    | 0.1617   | 0.1535   | -0.0749 | 0.868819 |
| <i>Gm9892</i>        | chr8:52195779-52197160    | 1.1004   | 1.1333   | 0.0425  | 0.931500 |
| <i>Farsa</i>         | chr8:84856988-84869257    | 21.3400  | 21.1969  | -0.0097 | 0.879983 |
| <i>E2f4</i>          | chr8:105297662-105305369  | 24.7004  | 24.5891  | -0.0065 | 0.945764 |
| <i>Jrkl</i>          | chr9:13242789-13245741    | 7.7796   | 7.5801   | -0.0375 | 0.705713 |
| <i>Zfp560</i>        | chr9:20345135-20385177    | 2.7604   | 2.7544   | -0.0031 | 0.983905 |
| <i>Lactb</i>         | chr9:66955392-66975484    | 15.1819  | 14.8017  | -0.0366 | 0.739271 |
| <i>Gm26448</i>       | chr9:120129350-120129553  | 402.9704 | 410.1319 | 0.0254  | 0.939941 |
| <i>Nsdhl</i>         | chrX:72918556-72958514    | 4.2432   | 4.2355   | -0.0026 | 0.976517 |
| <i>Myg1</i>          | chr15:102331708-102338139 | 14.0603  | 14.0382  | -0.0023 | 0.986491 |
| <i>Exoc5</i>         | chr14:49012145-49066653   | 15.9074  | 15.5670  | -0.0312 | 0.739004 |
| <i>Hnrnpc</i>        | chr14:52073379-52104028   | 57.8755  | 56.4995  | -0.0347 | 0.776583 |
| <i>Ndufb10</i>       | chr17:24722059-24724478   | 49.3802  | 49.5821  | 0.0059  | 0.978957 |
| <i>Rab5a</i>         | chr17:53479233-53507671   | 25.2034  | 25.1360  | -0.0039 | 0.971378 |
| <i>Cep19</i>         | chr16:32099799-32108069   | 15.5392  | 15.1593  | -0.0357 | 0.784893 |
| <i>Gm25848</i>       | chr16:32243711-32243855   | 13.3283  | 13.7384  | 0.0437  | 0.935287 |
| <i>Rbm4</i>          | chr19:4784292-4793901     | 26.6776  | 26.4945  | -0.0099 | 0.756223 |
| <i>Ubt1</i>          | chr19:41981762-42034641   | 3.9882   | 4.0037   | 0.0056  | 0.967413 |
| <i>Gm16150</i>       | chr1:38235419-38246666    | 3.7497   | 3.8285   | 0.0300  | 0.936881 |
| <i>Snora75</i>       | chr1:86351168-86351301    | 19.9406  | 19.1394  | -0.0592 | 0.767499 |
| <i>Ywhab</i>         | chr2:163994959-164018588  | 37.2071  | 36.4361  | -0.0302 | 0.674872 |
| <i>Dhx36</i>         | chr3:62470038-62507004    | 39.6353  | 38.7816  | -0.0314 | 0.729032 |
| <i>583041710Rik</i>  | chr3:88775215-88826328    | 3.1733   | 3.1659   | -0.0034 | 0.978309 |
| <i>Pi4kb</i>         | chr3:94974720-95006843    | 26.9837  | 26.4358  | -0.0296 | 0.571190 |
| <i>Gm15441</i>       | chr3:96555764-96566801    | 118.0056 | 115.3666 | -0.0326 | 0.739118 |
| <i>Gm10288</i>       | chr3:146838774-146839365  | 1.8513   | 1.8852   | 0.0262  | 0.915067 |
| <i>Il11ra1</i>       | chr4:41699988-41769474    | 1.3175   | 1.2769   | -0.0451 | 0.735920 |
| <i>Task1</i>         | chr4:43441938-43448064    | 9.8627   | 9.6436   | -0.0324 | 0.770746 |
| <i>Ncbp1</i>         | chr4:46138612-46172403    | 44.4046  | 43.4903  | -0.0300 | 0.583999 |
| <i>Bspry</i>         | chr4:62480052-62497298    | 1.0197   | 1.0326   | 0.0182  | 0.962247 |
| <i>Zfp839</i>        | chr12:110850278-110869998 | 2.4139   | 2.3447   | -0.0420 | 0.814375 |
| <i>Aldh3b1</i>       | chr19:3913492-3929761     | 1.7240   | 1.7451   | 0.0175  | 0.956972 |
| <i>Tor1aip2</i>      | chr1:156035402-156068861  | 17.5350  | 17.4222  | -0.0093 | 0.902848 |
| <i>Arhgap21</i>      | chr2:20847918-20968881    | 0.6293   | 0.6340   | 0.0108  | 0.951823 |
| <i>Gm12097</i>       | chr11:30572790-30574454   | 0.8282   | 0.8537   | 0.0438  | 0.926358 |
| <i>Eed</i>           | chr7:89954655-89980983    | 35.0900  | 34.3537  | -0.0306 | 0.570149 |
| <i>Desi1</i>         | chr15:81992522-82033862   | 5.0350   | 4.9099   | -0.0363 | 0.759172 |
| <i>Mterf4</i>        | chr1:93299210-93305915    | 6.3433   | 6.3160   | -0.0062 | 0.940964 |
| <i>Dcaf6</i>         | chr1:165329510-165460465  | 21.3201  | 21.2083  | -0.0076 | 0.885534 |
| <i>Gm13185</i>       | chr2:3752985-3755177      | 4.4014   | 4.4716   | 0.0228  | 0.943336 |
| <i>Lzts3</i>         | chr2:130632838-130642803  | 0.4622   | 0.4422   | -0.0637 | 0.801405 |
| <i>Gm25580</i>       | chr6:30143800-30144127    | 4.3170   | 4.3943   | 0.0256  | 0.932799 |
| <i>Zdhhc1</i>        | chr8:105472480-105484350  | 2.7850   | 2.6857   | -0.0524 | 0.815165 |
| <i>Ykt6</i>          | chr11:5955692-5967780     | 29.7592  | 29.5473  | -0.0103 | 0.805975 |
| <i>Hs3st3b1</i>      | chr11:63885791-63922290   | 13.0250  | 12.9640  | -0.0068 | 0.954577 |
| <i>Casp8ap2</i>      | chr4:32615450-32653265    | 25.4407  | 25.3411  | -0.0057 | 0.952169 |
| <i>Traj4</i>         | chr14:54216290-54216353   | 33.4575  | 33.9351  | 0.0204  | 0.945304 |
| <i>E430024P14Rik</i> | chr17:7881105-7946426     | 10.1716  | 10.1392  | -0.0046 | 0.969243 |
| <i>Lta</i>           | chr17:35203164-35205351   | 4.8644   | 4.7144   | -0.0452 | 0.823133 |
| <i>Rpp21</i>         | chr17:36255644-36258069   | 24.7414  | 24.6589  | -0.0048 | 0.961395 |
| <i>Snord87</i>       | chr1:9942462-9942549      | 24.9986  | 23.6762  | -0.0784 | 0.850233 |
| <i>Hist1h2ag</i>     | chr13:22042478-22042949   | 3.2284   | 3.3070   | 0.0347  | 0.931445 |
| <i>Gm16288</i>       | chr5:30240081-30240448    | 2.7076   | 2.5789   | -0.0703 | 0.861319 |
| <i>Pde4c</i>         | chr8:70723719-70751186    | 0.1612   | 0.1657   | 0.0401  | 0.893402 |
| <i>Gm17169</i>       | chr8:81790557-81790908    | 10.4163  | 10.5646  | 0.0204  | 0.956561 |
| <i>Atp5d</i>         | chr10:80138631-80145818   | 40.7720  | 40.7549  | -0.0006 | 0.997540 |
| <i>Dusp6</i>         | chr10:99263230-99267488   | 17.7608  | 17.2733  | -0.0402 | 0.851187 |
| <i>Rap1b</i>         | chr10:117814470-117845935 | 225.3008 | 220.6202 | -0.0303 | 0.751966 |
| <i>Avil</i>          | chr10:127000708-127020994 | 0.2397   | 0.2483   | 0.0505  | 0.881631 |

|                      |                           |           |           |         |          |
|----------------------|---------------------------|-----------|-----------|---------|----------|
| <i>Dnaja14</i>       | chr10:128805675-128819446 | 32.6561   | 32.0002   | -0.0293 | 0.579276 |
| <i>Ubtfd2</i>        | chr11:32455369-32516687   | 1.8361    | 1.8641    | 0.0218  | 0.929259 |
| <i>Gm12185</i>       | chr11:48904655-48992226   | 15.2448   | 15.2798   | 0.0033  | 0.989210 |
| <i>4930412M03Rik</i> | chr11:60112218-60115230   | 6.3257    | 6.3607    | 0.0080  | 0.959822 |
| <i>Gm12289</i>       | chr11:64012614-64015224   | 0.9381    | 0.9509    | 0.0196  | 0.957891 |
| <i>Map2k4</i>        | chr11:65688242-65788297   | 11.0358   | 10.9803   | -0.0073 | 0.952801 |
| <i>Ctns</i>          | chr11:73183595-73199042   | 5.2690    | 5.2555    | -0.0037 | 0.968374 |
| <i>Rps12-ps19</i>    | chr11:75070813-75071213   | 1.8687    | 1.9173    | 0.0371  | 0.915485 |
| <i>Gemin4</i>        | chr11:76210570-76217664   | 10.3707   | 10.3041   | -0.0093 | 0.894693 |
| <i>Rsad1</i>         | chr11:94539797-94549255   | 2.5100    | 2.4402    | -0.0407 | 0.720432 |
| <i>Acly</i>          | chr11:100476352-100528000 | 67.6477   | 66.0596   | -0.0343 | 0.797747 |
| <i>Fam20a</i>        | chr11:109669748-109722279 | 0.5901    | 0.5957    | 0.0136  | 0.954337 |
| <i>Pomc</i>          | chr12:3954950-3960618     | 1.0896    | 1.0392    | -0.0683 | 0.815058 |
| <i>Rrm2</i>          | chr12:24708240-24714146   | 5.3008    | 5.3182    | 0.0047  | 0.988454 |
| <i>Akt1</i>          | chr12:112653820-112674884 | 31.6263   | 30.8992   | -0.0336 | 0.765856 |
| <i>Hist1h4j</i>      | chr13:21735061-21735837   | 9.6145    | 9.2730    | -0.0522 | 0.851537 |
| <i>Gm16984</i>       | chr13:34963981-34990452   | 4.7754    | 4.6250    | -0.0462 | 0.625384 |
| <i>Fam120a</i>       | chr13:48879218-48968017   | 71.3972   | 70.9249   | -0.0096 | 0.904154 |
| <i>Naa35</i>         | chr13:59585258-59634798   | 5.8579    | 5.7239    | -0.0334 | 0.710146 |
| <i>Zfp429</i>        | chr13:67389308-67399767   | 13.0777   | 12.7592   | -0.0356 | 0.781189 |
| <i>Ppap2a</i>        | chr13:112800893-112867881 | 2.3755    | 2.2943    | -0.0501 | 0.830543 |
| <i>Atraid</i>        | chr5:31048311-31054633    | 18.5387   | 18.4299   | -0.0085 | 0.893961 |
| <i>BC005561</i>      | chr5:104508351-104522383  | 11.5706   | 11.5433   | -0.0034 | 0.977841 |
| <i>Pilra</i>         | chr5:137821951-137836268  | 1.6446    | 1.6539    | 0.0082  | 0.975577 |
| <i>Gm16042</i>       | chr6:8595737-8596988      | 9.2868    | 9.0417    | -0.0386 | 0.813721 |
| <i>Gm16042</i>       | chr6:8595742-8596989      | 9.3166    | 9.0707    | -0.0386 | 0.813721 |
| <i>Arf5</i>          | chr6:28423559-28426602    | 73.3805   | 71.3120   | -0.0413 | 0.852278 |
| <i>Pyurf</i>         | chr6:57686575-57692078    | 6.9409    | 6.9187    | -0.0046 | 0.958666 |
| <i>Eogt</i>          | chr6:97110023-97149182    | 4.5004    | 4.4872    | -0.0042 | 0.967478 |
| <i>Dusp16</i>        | chr6:134715472-134792625  | 0.8185    | 0.7955    | -0.0411 | 0.759540 |
| <i>Rps11</i>         | chr7:45122387-45124389    | 1071.2114 | 1044.2261 | -0.0368 | 0.835941 |
| <i>Dcun1d3</i>       | chr7:119853162-119896291  | 6.9858    | 6.8361    | -0.0312 | 0.721577 |
| <i>Kdm8</i>          | chr7:125444675-125462265  | 3.9164    | 3.9150    | -0.0005 | 0.996072 |
| <i>Echs1</i>         | chr7:140105709-140116476  | 6.2292    | 6.2114    | -0.0041 | 0.976829 |
| <i>Mtg1</i>          | chr7:140137563-140150786  | 4.5185    | 4.4025    | -0.0375 | 0.745059 |
| <i>Agpat5</i>        | chr8:18846276-18891361    | 3.7856    | 3.7636    | -0.0084 | 0.929405 |
| <i>Dhx38</i>         | chr8:109548016-109565601  | 26.4735   | 25.8997   | -0.0316 | 0.717984 |
| <i>Birc2</i>         | chr9:7818235-7835255      | 47.2831   | 46.2207   | -0.0328 | 0.779491 |
| <i>Zwilch</i>        | chr9:64137143-64173104    | 1.7399    | 1.6894    | -0.0425 | 0.774976 |
| <i>Gorasp1</i>       | chr9:119925672-119937558  | 5.9679    | 5.8290    | -0.0340 | 0.651564 |
| <i>Apoo</i>          | chrX:94367116-94417093    | 0.6841    | 0.6977    | 0.0284  | 0.953962 |
| <i>Zxdb</i>          | chrX:94724568-94730191    | 2.1686    | 2.1062    | -0.0421 | 0.747118 |
| <i>Wbp5</i>          | chrX:136245078-136247139  | 9.9864    | 9.6819    | -0.0447 | 0.845650 |
| <i>6030458C11Rik</i> | chr15:12808176-12824657   | 14.9258   | 14.6166   | -0.0302 | 0.551299 |
| <i>CommD5</i>        | chr15:76899909-76901305   | 12.2683   | 11.8741   | -0.0471 | 0.841553 |
| <i>Tnrc6b</i>        | chr15:80711318-80941086   | 22.8657   | 22.3209   | -0.0348 | 0.829814 |
| <i>Phf5a</i>         | chr15:81865318-81871911   | 34.0973   | 34.0195   | -0.0033 | 0.980128 |
| <i>2700060E02Rik</i> | chr14:19811401-19823823   | 36.3889   | 36.3219   | -0.0027 | 0.983426 |
| <i>Dleu2</i>         | chr14:61602838-61682373   | 8.4640    | 8.2663    | -0.0341 | 0.817248 |
| <i>Narf1</i>         | chr17:25773775-25783332   | 9.5215    | 9.3027    | -0.0335 | 0.622658 |
| <i>Pdia2</i>         | chr17:26195998-26199087   | 0.7697    | 0.7901    | 0.0379  | 0.897808 |
| <i>Zfp119a</i>       | chr17:55865203-55878862   | 7.1097    | 6.9113    | -0.0408 | 0.768533 |
| <i>Slx4</i>          | chr16:3979104-4003770     | 8.6612    | 8.4729    | -0.0317 | 0.785106 |
| <i>Gm23935</i>       | chr16:11144124-11144181   | 1319.5917 | 1258.9925 | -0.0678 | 0.884918 |
| <i>Cd200r4</i>       | chr16:44811732-44839150   | 6.5153    | 6.4893    | -0.0058 | 0.944246 |
| <i>Rbm4b</i>         | chr19:4756542-4767065     | 11.4203   | 11.4071   | -0.0017 | 0.992237 |
| <i>Stk17b</i>        | chr1:53755505-53785224    | 316.0343  | 308.5790  | -0.0344 | 0.810486 |
| <i>Stradb</i>        | chr1:58973521-58995715    | 2.3017    | 2.2989    | -0.0018 | 0.989114 |
| <i>Gm26720</i>       | chr1:91989050-91992628    | 2.9356    | 2.9372    | 0.0008  | 0.996376 |
| <i>Gm25612</i>       | chr1:134505337-134505463  | 6.1874    | 5.8288    | -0.0861 | 0.866835 |
| <i>Smg7</i>          | chr1:152836995-152902646  | 32.1780   | 31.9647   | -0.0096 | 0.865682 |
| <i>Dars2</i>         | chr1:161040600-161070658  | 5.6339    | 5.5048    | -0.0334 | 0.640529 |
| <i>D730003115Rik</i> | chr1:191224473-191225686  | 10.2822   | 9.9836    | -0.0425 | 0.851771 |
| <i>Rab18</i>         | chr18:6765204-6790231     | 16.9997   | 16.8947   | -0.0089 | 0.708901 |
| <i>D2Wsu81e</i>      | chr2:30173446-30178459    | 10.7222   | 10.6664   | -0.0075 | 0.897173 |
| <i>Arpc5l</i>        | chr2:39008075-39015877    | 27.4085   | 27.2716   | -0.0072 | 0.914299 |
| <i>Tubgcp4</i>       | chr2:121170653-121198770  | 15.8186   | 15.5025   | -0.0291 | 0.658795 |
| <i>1810024B03Rik</i> | chr2:127186354-127208280  | 1.4252    | 1.4294    | 0.0042  | 0.974932 |
| <i>Anapc1</i>        | chr2:128610103-128687391  | 19.3549   | 19.2106   | -0.0108 | 0.851380 |
| <i>Bcl2l1</i>        | chr2:152780667-152831728  | 3.3054    | 3.2120    | -0.0413 | 0.833820 |
| <i>Eif6</i>          | chr2:155819831-155826925  | 30.2216   | 29.5421   | -0.0328 | 0.749249 |

|                      |                           |          |          |         |          |
|----------------------|---------------------------|----------|----------|---------|----------|
| <i>Fam65c</i>        | chr2:167980163-168010618  | 0.2385   | 0.2458   | 0.0434  | 0.933191 |
| <i>Gm20716</i>       | chr2:168180985-168230364  | 30.7461  | 30.5987  | -0.0069 | 0.946902 |
| <i>4930577N17Rik</i> | chr3:51277570-51279805    | 3.1877   | 3.0698   | -0.0544 | 0.788367 |
| <i>D930015E06Rik</i> | chr3:83898286-84040161    | 36.2717  | 36.1385  | -0.0053 | 0.973280 |
| <i>2810403A07Rik</i> | chr3:88685793-88712933    | 63.2615  | 62.7511  | -0.0117 | 0.717598 |
| <i>Gm17608</i>       | chr3:97284907-97297778    | 1.0587   | 1.0148   | -0.0611 | 0.849300 |
| <i>Lrrc39</i>        | chr3:116562972-116583134  | 4.8088   | 4.7019   | -0.0324 | 0.650316 |
| <i>Ostc</i>          | chr3:130695920-130709444  | 63.3368  | 61.7603  | -0.0364 | 0.809961 |
| <i>B4galt1</i>       | chr4:40804601-40854005    | 40.1077  | 39.2586  | -0.0309 | 0.733278 |
| <i>Prpf38a</i>       | chr4:108563171-108579336  | 13.1022  | 12.8141  | -0.0321 | 0.689494 |
| <i>Tesk2</i>         | chr4:116720947-116805956  | 7.9060   | 7.8602   | -0.0084 | 0.911633 |
| <i>Foxj3</i>         | chr4:119537003-119629119  | 7.0751   | 6.9313   | -0.0296 | 0.701470 |
| <i>Snrnp40</i>       | chr4:130360131-130390026  | 16.3647  | 15.9784  | -0.0345 | 0.765679 |
| <i>Gm12999</i>       | chr4:132532686-132533601  | 7.3524   | 7.1045   | -0.0495 | 0.773308 |
| <i>Cdk11b</i>        | chr4:155624853-155649938  | 29.4066  | 29.2902  | -0.0057 | 0.957060 |
| <i>Rps15a</i>        | chr7:118104377-118116186  | 80.0462  | 77.4875  | -0.0469 | 0.839639 |
| <i>Plekhg1</i>       | chr10:3740363-3967303     | 0.0844   | 0.0864   | 0.0345  | 0.909127 |
| <i>Phtf2</i>         | chr5:20758662-20882124    | 5.1900   | 5.0744   | -0.0325 | 0.709244 |
| <i>Bud31</i>         | chr5:145140361-145148078  | 45.7781  | 45.6864  | -0.0029 | 0.983009 |
| <i>Mlst8</i>         | chr17:24473549-24479078   | 12.4329  | 12.1693  | -0.0309 | 0.642779 |
| <i>St6gal1</i>       | chr16:23224739-23360350   | 45.9514  | 45.0808  | -0.0276 | 0.534703 |
| <i>Hipk3</i>         | chr2:104426480-104494446  | 22.2597  | 22.1219  | -0.0090 | 0.888905 |
| <i>Insf6</i>         | chr19:29321343-29325356   | 15.0139  | 15.0431  | 0.0028  | 0.991643 |
| <i>Tpt1-ps6</i>      | chrX:101768534-101769057  | 1.4833   | 1.5312   | 0.0458  | 0.931355 |
| <i>Natd1</i>         | chr11:60902245-60914750   | 2.3656   | 2.3053   | -0.0373 | 0.709514 |
| <i>Gm11626</i>       | chr11:101456575-101457390 | 49.0190  | 48.9046  | -0.0034 | 0.983230 |
| <i>Cdk3-ps</i>       | chr11:116216002-116220287 | 0.8142   | 0.8265   | 0.0216  | 0.879283 |
| <i>Dip2c</i>         | chr13:9276527-9668928     | 1.1247   | 1.0896   | -0.0458 | 0.887004 |
| <i>Fbxw17</i>        | chr13:50417863-50433780   | 3.7241   | 3.7173   | -0.0026 | 0.986055 |
| <i>Gm15477</i>       | chr5:67847065-67909013    | 0.3688   | 0.3541   | -0.0586 | 0.667704 |
| <i>Lsm5</i>          | chr6:56701062-56704692    | 3.7044   | 3.5717   | -0.0526 | 0.838937 |
| <i>Det1</i>          | chr7:78822961-78847236    | 9.8897   | 9.8389   | -0.0074 | 0.930080 |
| <i>Armc6</i>         | chr8:70220171-70234466    | 3.6829   | 3.5794   | -0.0411 | 0.737246 |
| <i>2310036O22Rik</i> | chr8:85026832-85030285    | 145.5613 | 145.3753 | -0.0018 | 0.992169 |
| <i>Cdh11</i>         | chr8:102632994-102785111  | 0.2863   | 0.2748   | -0.0593 | 0.769685 |
| <i>Msn</i>           | chrX:96096041-96168552    | 94.7755  | 94.1711  | -0.0092 | 0.922966 |
| <i>Rnf139</i>        | chr15:58889228-58902390   | 30.3239  | 29.6586  | -0.0320 | 0.755522 |
| <i>Tsta3</i>         | chr15:75924683-75929730   | 19.3124  | 19.2912  | -0.0016 | 0.993259 |
| <i>Lrp10</i>         | chr14:54464163-54471497   | 29.7430  | 29.0293  | -0.0350 | 0.816298 |
| <i>Gm16973</i>       | chr14:56696279-56701268   | 9.0465   | 8.8318   | -0.0346 | 0.749151 |
| <i>Ltb</i>           | chr17:35194438-35196320   | 326.0566 | 318.9678 | -0.0317 | 0.746154 |
| <i>Mgat5</i>         | chr1:127204985-127483704  | 9.7219   | 9.5225   | -0.0299 | 0.640909 |
| <i>Gpr151</i>        | chr18:42578019-42579652   | 2.3129   | 2.2228   | -0.0573 | 0.894367 |
| <i>Ptpla</i>         | chr2:13975562-14056135    | 0.6990   | 0.6599   | -0.0832 | 0.845574 |
| <i>9330198N18Rik</i> | chr2:30629654-30689210    | 1.3713   | 1.3943   | 0.0240  | 0.953510 |
| <i>Nek6</i>          | chr2:38511642-38588041    | 0.5919   | 0.5976   | 0.0138  | 0.952046 |
| <i>Gm11814</i>       | chr4:10438814-10439743    | 1.3491   | 1.3670   | 0.0190  | 0.952968 |
| <i>Bend5</i>         | chr4:111415005-111460298  | 3.0286   | 2.9524   | -0.0368 | 0.838374 |
| <i>Gm13139</i>       | chr4:147132037-147180579  | 1.7749   | 1.7110   | -0.0529 | 0.855087 |
| <i>Sbsn</i>          | chr7:30734738-30756134    | 1.3668   | 1.3238   | -0.0461 | 0.859108 |
| <i>Cmtm7</i>         | chr9:114756836-114781993  | 42.7516  | 42.4765  | -0.0093 | 0.844560 |
| <i>Zfp319</i>        | chr8:95326136-95331950    | 6.4261   | 6.4184   | -0.0017 | 0.991333 |
| <i>Cgrrf1</i>        | chr14:46832133-46854193   | 2.2485   | 2.2506   | 0.0013  | 0.994133 |
| <i>Uqcrc2</i>        | chr7:120635175-120659478  | 72.5592  | 70.9493  | -0.0324 | 0.760416 |
| <i>2310007L24Rik</i> | chr11:106365473-106377114 | 0.7232   | 0.6878   | -0.0724 | 0.808838 |
| <i>Mrpl52</i>        | chr14:54426908-54429750   | 55.3301  | 54.0550  | -0.0336 | 0.749858 |
| <i>Snora43</i>       | chr2:26637847-26637974    | 13.5257  | 12.8708  | -0.0716 | 0.836970 |
| <i>Gm14123</i>       | chr2:150606232-150610254  | 1.0470   | 1.0527   | 0.0079  | 0.951245 |
| <i>Csrp2</i>         | chr10:110920176-110939599 | 0.7745   | 0.7390   | -0.0676 | 0.862575 |
| <i>Adam19</i>        | chr11:46055991-46147343   | 23.9940  | 23.4103  | -0.0355 | 0.841137 |
| <i>Gm11672</i>       | chr11:106126335-106127351 | 3.7461   | 3.7712   | 0.0096  | 0.956657 |
| <i>Cep95</i>         | chr11:106789251-106819930 | 17.6769  | 17.5688  | -0.0089 | 0.900273 |
| <i>Adi1</i>          | chr12:28675230-28682175   | 6.6812   | 6.6708   | -0.0022 | 0.981916 |
| <i>Ccdc176</i>       | chr12:84409070-84433780   | 2.5023   | 2.4275   | -0.0437 | 0.805829 |
| <i>Gm24111</i>       | chr13:48537824-48537921   | 26.4059  | 25.5179  | -0.0493 | 0.852189 |
| <i>Cep135</i>        | chr5:76588697-76646466    | 10.5921  | 10.3578  | -0.0323 | 0.775889 |
| <i>Myo1h</i>         | chr5:114314940-114364576  | 7.9333   | 7.7672   | -0.0305 | 0.700435 |
| <i>Git2</i>          | chr5:114727406-114775517  | 21.0527  | 20.6238  | -0.0297 | 0.749638 |
| <i>Snx8</i>          | chr5:140340303-140389251  | 0.7276   | 0.7345   | 0.0136  | 0.961524 |
| <i>Zfp800</i>        | chr6:28239930-28398005    | 20.6935  | 20.5885  | -0.0073 | 0.938966 |
| <i>lft122</i>        | chr6:115853469-115926699  | 0.3441   | 0.3315   | -0.0540 | 0.687657 |

|                      |                           |         |         |         |          |
|----------------------|---------------------------|---------|---------|---------|----------|
| <i>Kansl2-ps</i>     | chr7:72672817-72674278    | 0.5202  | 0.5368  | 0.0454  | 0.910366 |
| <i>Trappc5</i>       | chr8:3676298-3681255      | 14.1958 | 13.8625 | -0.0343 | 0.806176 |
| <i>Z310045N01Rik</i> | chr8:70139498-70167488    | 13.0821 | 12.7948 | -0.0320 | 0.728620 |
| <i>Syce2</i>         | chr8:84872110-84888221    | 1.7908  | 1.7946  | 0.0031  | 0.977640 |
| <i>BC048644</i>      | chr8:121907832-121918428  | 0.8985  | 0.9027  | 0.0068  | 0.964750 |
| <i>Sorl1</i>         | chr9:41964719-42124297    | 32.7424 | 31.9139 | -0.0370 | 0.851491 |
| <i>Rsl24d1</i>       | chr9:73113425-73123333    | 11.2663 | 11.2277 | -0.0050 | 0.958787 |
| <i>Arxes2</i>        | chrX:135993819-135995359  | 0.8181  | 0.7789  | -0.0709 | 0.864956 |
| <i>Gm20732</i>       | chr15:68340982-68363176   | 2.0372  | 1.9548  | -0.0595 | 0.856121 |
| <i>Selo</i>          | chr15:89089083-89100340   | 20.6138 | 20.4558 | -0.0111 | 0.839572 |
| <i>Gm16279</i>       | chr17:35896945-35912215   | 3.2034  | 3.2102  | 0.0031  | 0.980630 |
| <i>Strn</i>          | chr17:78649912-78737196   | 16.2538 | 15.9362 | -0.0285 | 0.677446 |
| <i>Naa40</i>         | chr19:7225667-7241222     | 15.4157 | 15.0891 | -0.0309 | 0.742758 |
| <i>Osbp</i>          | chr19:11965843-11994105   | 24.2055 | 23.7234 | -0.0290 | 0.726509 |
| <i>Smc5</i>          | chr19:23206440-23273897   | 16.9557 | 16.8531 | -0.0088 | 0.921896 |
| <i>Rnf149</i>        | chr1:39551295-39577405    | 11.6855 | 11.4336 | -0.0314 | 0.549481 |
| <i>Hhat</i>          | chr1:192512827-192771213  | 0.3984  | 0.3997  | 0.0047  | 0.977954 |
| <i>C330018D20Rik</i> | chr18:56955832-56975368   | 4.5698  | 4.5574  | -0.0039 | 0.981480 |
| <i>Cdca7</i>         | chr2:72476158-72486893    | 6.1291  | 5.9444  | -0.0441 | 0.826666 |
| <i>Dgkz</i>          | chr2:91932823-91975864    | 53.0923 | 51.9754 | -0.0307 | 0.750234 |
| <i>Mybl2</i>         | chr2:163054686-163084688  | 0.5103  | 0.4860  | -0.0703 | 0.849410 |
| <i>4931440P22Rik</i> | chr3:65507256-65529379    | 0.5860  | 0.5632  | -0.0573 | 0.823415 |
| <i>Adamts14</i>      | chr3:95676200-95687917    | 1.5148  | 1.5161  | 0.0012  | 0.995948 |
| <i>Fbxo39</i>        | chr11:72314443-72319416   | 0.5581  | 0.5257  | -0.0861 | 0.856989 |
| <i>Gm22075</i>       | chr11:72800286-72800478   | 3.6718  | 3.8277  | 0.0600  | 0.931776 |
| <i>Tram2</i>         | chr1:20996295-21079229    | 1.1269  | 1.1384  | 0.0146  | 0.971764 |
| <i>Hps6</i>          | chr19:46003477-46006173   | 7.3530  | 7.3402  | -0.0025 | 0.987457 |
| <i>Zfp280b</i>       | chr10:76032653-76043234   | 5.7288  | 5.6075  | -0.0309 | 0.550194 |
| <i>Ggnbp2</i>        | chr11:84832360-84870817   | 40.8789 | 40.0989 | -0.0278 | 0.637478 |
| <i>Coch</i>          | chr12:51593340-51605773   | 0.6997  | 0.7115  | 0.0241  | 0.954135 |
| <i>Dek</i>           | chr13:47084774-47106201   | 61.6600 | 60.3272 | -0.0315 | 0.795393 |
| <i>Trappc13</i>      | chr13:104142148-104178469 | 11.2959 | 11.0583 | -0.0307 | 0.751143 |
| <i>Gm23547</i>       | chr6:124715231-124715502  | 44.4539 | 44.4183 | -0.0012 | 0.994270 |
| <i>Gm16184</i>       | chr7:19911824-19912397    | 1.3019  | 1.2396  | -0.0708 | 0.870834 |
| <i>Trpm4</i>         | chr7:45303154-45333780    | 1.2816  | 1.2878  | 0.0069  | 0.976962 |
| <i>Fnta</i>          | chr8:25998728-26015601    | 32.9483 | 32.7322 | -0.0095 | 0.845755 |
| <i>B3gnt9</i>        | chr8:105252637-105255153  | 4.5726  | 4.4625  | -0.0352 | 0.697059 |
| <i>Snx19</i>         | chr9:30427328-30466726    | 12.6263 | 12.3608 | -0.0307 | 0.723078 |
| <i>Traip</i>         | chr9:107950962-107972268  | 1.9959  | 1.9254  | -0.0519 | 0.852877 |
| <i>Dnal4</i>         | chr15:79761452-79777849   | 2.8933  | 2.8989  | 0.0028  | 0.988973 |
| <i>Scaf4</i>         | chr16:90228956-90284425   | 9.6473  | 9.6165  | -0.0046 | 0.975708 |
| <i>Map4k4</i>        | chr1:39900912-40026310    | 73.3332 | 72.8392 | -0.0098 | 0.910379 |
| <i>Cdk5rap2</i>      | chr4:70216855-70410443    | 7.7769  | 7.6213  | -0.0292 | 0.655017 |
| <i>lqcc</i>          | chr4:129615125-129619099  | 16.8665 | 16.5228 | -0.0297 | 0.634175 |
| <i>Wdr18</i>         | chr10:79960151-79969246   | 16.7905 | 16.6976 | -0.0080 | 0.940650 |
| <i>Gm17203</i>       | chr19:59896240-59901062   | 0.4357  | 0.4419  | 0.0204  | 0.923491 |
| <i>Haus6</i>         | chr4:86578854-86612055    | 10.9854 | 10.7666 | -0.0290 | 0.722124 |
| <i>Dsel</i>          | chr1:111858701-111864909  | 1.0104  | 1.0133  | 0.0041  | 0.979560 |
| <i>Pex14</i>         | chr4:148960534-149099876  | 3.9302  | 3.8432  | -0.0323 | 0.762752 |
| <i>Sec23a</i>        | chr12:58958382-59012017   | 10.9337 | 10.8606 | -0.0097 | 0.891830 |
| <i>Sp3os</i>         | chr2:72979423-72988677    | 7.6388  | 7.4172  | -0.0425 | 0.843668 |
| <i>Fam207a</i>       | chr10:77486655-77515813   | 18.6786 | 18.2830 | -0.0309 | 0.761986 |
| <i>Dot1l</i>         | chr10:80755205-80795461   | 5.6711  | 5.5436  | -0.0328 | 0.819574 |
| <i>Spp12b</i>        | chr10:80855274-80868705   | 8.9286  | 8.7099  | -0.0358 | 0.802884 |
| <i>Polr3b</i>        | chr10:84622436-84727177   | 26.6257 | 26.4171 | -0.0113 | 0.846545 |
| <i>Rab5c</i>         | chr11:100715008-100738215 | 75.4639 | 73.8282 | -0.0316 | 0.786001 |
| <i>Ubtf</i>          | chr11:102304559-102319742 | 39.0159 | 38.7230 | -0.0109 | 0.847506 |
| <i>Smim6</i>         | chr11:115912016-115913920 | 1.5422  | 1.4854  | -0.0542 | 0.846207 |
| <i>Cenpo</i>         | chr12:4196003-4234294     | 7.7252  | 7.5693  | -0.0294 | 0.697263 |
| <i>Erh</i>           | chr12:80634021-80644341   | 2.4618  | 2.3746  | -0.0520 | 0.795632 |
| <i>Rin3</i>          | chr12:102283047-102390855 | 5.2628  | 5.2541  | -0.0024 | 0.990339 |
| <i>Akr1c13</i>       | chr13:4191183-4205596     | 11.6990 | 11.3724 | -0.0408 | 0.879430 |
| <i>Cage1</i>         | chr13:38006051-38037069   | 1.1241  | 1.1220  | -0.0027 | 0.986272 |
| <i>Gm26514</i>       | chr13:38945542-38951313   | 2.6436  | 2.6490  | 0.0029  | 0.991009 |
| <i>5033430I15Rik</i> | chr13:45965252-45966500   | 1.0176  | 1.0369  | 0.0272  | 0.945639 |
| <i>Glrx</i>          | chr13:75839867-75850151   | 6.1588  | 6.0036  | -0.0368 | 0.576439 |
| <i>Wdr41</i>         | chr13:94976343-95023314   | 6.2620  | 6.1409  | -0.0282 | 0.708983 |
| <i>Cenpk</i>         | chr13:104228954-104249615 | 1.1241  | 1.1338  | 0.0124  | 0.977602 |
| <i>Gm21967</i>       | chr13:119606649-119610458 | 2.8510  | 2.7726  | -0.0402 | 0.862652 |
| <i>Slc5a6</i>        | chr5:31036035-31048924    | 3.1474  | 3.0659  | -0.0379 | 0.772360 |
| <i>lft172</i>        | chr5:31253279-31291114    | 3.9676  | 3.8769  | -0.0334 | 0.768133 |



|                      |                           |           |           |         |          |
|----------------------|---------------------------|-----------|-----------|---------|----------|
| <i>Chfr</i>          | chr5:110135839-110171972  | 34.1964   | 33.5767   | -0.0264 | 0.484578 |
| <i>Atp6v1f</i>       | chr6:29467717-29470512    | 41.6693   | 40.7097   | -0.0336 | 0.799687 |
| <i>Sumf1</i>         | chr6:108107027-108185582  | 5.7771    | 5.6528    | -0.0314 | 0.496270 |
| <i>Ccnd2</i>         | chr6:127125778-127151048  | 69.8463   | 69.3231   | -0.0108 | 0.883908 |
| <i>Itfg2</i>         | chr6:128409443-128424931  | 4.3828    | 4.3559    | -0.0089 | 0.919377 |
| <i>Hspbp1</i>        | chr7:4660520-4684963      | 20.6785   | 20.2405   | -0.0309 | 0.772643 |
| <i>Zfp296</i>        | chr7:19577286-19580656    | 4.2911    | 4.1467    | -0.0494 | 0.891322 |
| <i>Gm26790</i>       | chr7:35772377-35779168    | 8.5756    | 8.3728    | -0.0345 | 0.702129 |
| <i>Tmem41b</i>       | chr7:109972186-109986929  | 2.6436    | 2.6388    | -0.0027 | 0.984332 |
| <i>Tufm</i>          | chr7:126487354-126490730  | 4.4199    | 4.3174    | -0.0338 | 0.809998 |
| <i>Vkorc1</i>        | chr7:127893066-127895617  | 6.3292    | 6.1425    | -0.0432 | 0.866276 |
| <i>Rab20</i>         | chr8:11453391-11478638    | 5.9897    | 5.8284    | -0.0394 | 0.800851 |
| <i>E030037K01Rik</i> | chr8:47713265-47715021    | 3.7777    | 3.7785    | 0.0003  | 0.998752 |
| <i>Ankle1</i>        | chr8:71406009-71409904    | 0.8369    | 0.8518    | 0.0254  | 0.970927 |
| <i>Gm5914</i>        | chr8:105624335-105637485  | 18.3054   | 17.8233   | -0.0385 | 0.864999 |
| <i>Vwa5a</i>         | chr9:38718267-38743337    | 14.2220   | 13.9261   | -0.0303 | 0.703027 |
| <i>Npat</i>          | chr9:53537046-53574342    | 15.3705   | 15.2649   | -0.0099 | 0.878866 |
| <i>NA</i>            | chr9:57148179-57151937    | 1.0871    | 1.0525    | -0.0466 | 0.830138 |
| <i>Ndufa1</i>        | chrX:37187587-37191163    | 76.6218   | 74.5993   | -0.0386 | 0.861674 |
| <i>C1galt1c1</i>     | chrX:38630784-38635087    | 15.9377   | 15.5917   | -0.0317 | 0.774073 |
| <i>Gyk</i>           | chrX:85701936-85776819    | 2.4217    | 2.4149    | -0.0041 | 0.973515 |
| <i>Fbxo4</i>         | chr15:3965444-3979573     | 5.9249    | 5.9112    | -0.0033 | 0.980911 |
| <i>Nadk2</i>         | chr15:9071259-9110487     | 5.7163    | 5.5802    | -0.0348 | 0.820565 |
| <i>Rrm2b</i>         | chr15:37923951-37961318   | 8.5326    | 8.3538    | -0.0306 | 0.768780 |
| <i>Gm17035</i>       | chr15:66929606-66931107   | 10.8199   | 10.8896   | 0.0093  | 0.966710 |
| <i>Gm15945</i>       | chr15:75661406-75663529   | 1.2095    | 1.1591    | -0.0614 | 0.843864 |
| <i>Slc39a4</i>       | chr15:76612384-76616852   | 2.3129    | 2.3181    | 0.0033  | 0.987718 |
| <i>Rpl8</i>          | chr15:76904070-76906318   | 1834.3080 | 1788.1576 | -0.0368 | 0.863690 |
| <i>Esp1</i>          | chr15:102296292-102324356 | 0.7407    | 0.7595    | 0.0363  | 0.952008 |
| <i>Trav13-2</i>      | chr14:53634828-53635398   | 5.4324    | 5.4685    | 0.0096  | 0.978560 |
| <i>Kcnrg</i>         | chr14:61607481-61611916   | 2.4954    | 2.4040    | -0.0538 | 0.767843 |
| <i>Bnip3l</i>        | chr14:66985238-67008877   | 20.3690   | 20.2641   | -0.0074 | 0.939103 |
| <i>Arid1b</i>        | chr17:4994331-5347656     | 9.5219    | 9.3223    | -0.0306 | 0.789538 |
| <i>C2</i>            | chr17:34856411-34898265   | 0.3724    | 0.3745    | 0.0079  | 0.979773 |
| <i>Vars</i>          | chr17:35000986-35016322   | 28.9381   | 28.2956   | -0.0324 | 0.801328 |
| <i>Aars2</i>         | chr17:45506840-45520842   | 6.7068    | 6.5595    | -0.0321 | 0.753987 |
| <i>Ubxn6</i>         | chr17:56067044-56075028   | 12.6057   | 12.5303   | -0.0086 | 0.933067 |
| <i>Ppp4r1</i>        | chr17:65782572-65841926   | 9.8580    | 9.6618    | -0.0290 | 0.675252 |
| <i>Rab12</i>         | chr17:66494511-66519717   | 9.0154    | 8.9693    | -0.0074 | 0.910753 |
| <i>Mett14</i>        | chr17:94727079-94749892   | 20.3079   | 19.8820   | -0.0306 | 0.773312 |
| <i>Cdip1</i>         | chr16:4750347-4790292     | 15.9790   | 15.8440   | -0.0122 | 0.691693 |
| <i>Abcc1</i>         | chr16:14361557-14475737   | 7.0842    | 6.9473    | -0.0282 | 0.555439 |
| <i>Gm15976</i>       | chr16:91924437-91928635   | 3.1654    | 3.0512    | -0.0530 | 0.852906 |
| <i>B3gat3</i>        | chr19:8920373-8927234     | 37.7834   | 36.9015   | -0.0341 | 0.811324 |
| <i>4933407L21Rik</i> | chr1:85928482-85940624    | 0.7713    | 0.7885    | 0.0318  | 0.927650 |
| <i>Tmem183a</i>      | chr1:134346096-134361999  | 21.7267   | 21.5553   | -0.0114 | 0.704019 |
| <i>Smyd2</i>         | chr1:189880491-189922363  | 7.2608    | 7.0960    | -0.0331 | 0.755691 |
| <i>Gm24514</i>       | chr18:55622632-55622920   | 3.1308    | 2.9653    | -0.0783 | 0.875798 |
| <i>Gm14091</i>       | chr2:118829873-118834122  | 3.8443    | 3.7300    | -0.0435 | 0.804548 |
| <i>Tm9sf4</i>        | chr2:153161302-153210466  | 6.2840    | 6.1573    | -0.0294 | 0.689685 |
| <i>Phf1os</i>        | chr3:103964535-103968581  | 15.2219   | 15.1227   | -0.0094 | 0.884867 |
| <i>Ggh</i>           | chr4:20042051-20066750    | 6.3823    | 6.3707    | -0.0026 | 0.978497 |
| <i>Ube2j1</i>        | chr4:33031415-33052363    | 38.2771   | 38.0694   | -0.0078 | 0.936502 |
| <i>Cd72</i>          | chr4:43446461-43454628    | 24.9503   | 24.4346   | -0.0301 | 0.720573 |
| <i>Slc2a1</i>        | chr4:119108710-119137330  | 13.7950   | 13.5072   | -0.0304 | 0.730748 |
| <i>Crocc</i>         | chr4:141016636-141060550  | 1.5197    | 1.4746    | -0.0435 | 0.852065 |
| <i>Srm</i>           | chr4:148591502-148594993  | 17.6343   | 17.5920   | -0.0035 | 0.983609 |
| <i>9430015G10Rik</i> | chr4:156109981-156127265  | 10.3094   | 10.2355   | -0.0104 | 0.895177 |
| <i>Ankrd53</i>       | chr6:83762643-83768326    | 0.6249    | 0.6315    | 0.0151  | 0.971752 |
| <i>Cfap53</i>        | chr18:74283089-74359986   | 0.3662    | 0.3737    | 0.0293  | 0.949323 |
| <i>Gm16741</i>       | chr14:7749944-7775528     | 1.8819    | 1.8210    | -0.0474 | 0.900730 |
| <i>Gm12276</i>       | chr11:62331420-62331721   | 13.9444   | 13.5635   | -0.0400 | 0.776040 |
| <i>Gm24233</i>       | chr12:59134071-59134193   | 8.4434    | 8.1249    | -0.0555 | 0.911022 |
| <i>Synj2bp</i>       | chr12:81497940-81532911   | 20.0842   | 20.0050   | -0.0057 | 0.966565 |
| <i>Nsmce4a</i>       | chr7:130532522-130573118  | 39.2265   | 38.9628   | -0.0097 | 0.911357 |
| <i>A930024E05Rik</i> | chr5:122989353-122998345  | 10.2688   | 10.2183   | -0.0071 | 0.942325 |
| <i>Prdx2</i>         | chr8:84969586-84974834    | 14.6471   | 14.5868   | -0.0059 | 0.968065 |
| <i>Specc1l</i>       | chr10:75212072-75312399   | 23.9844   | 23.7698   | -0.0130 | 0.734190 |
| <i>Gm26116</i>       | chr11:54658496-54658573   | 19.3006   | 19.4995   | 0.0148  | 0.963121 |
| <i>Fam114a2</i>      | chr11:57482992-57518617   | 30.5320   | 30.2518   | -0.0133 | 0.615887 |
| <i>Plscr3</i>        | chr11:69846375-69852058   | 3.3162    | 3.2276    | -0.0391 | 0.826639 |

|                      |                           |          |          |         |          |
|----------------------|---------------------------|----------|----------|---------|----------|
| <i>Alox12</i>        | chr11:70241456-70255353   | 0.2028   | 0.2078   | 0.0351  | 0.950338 |
| <i>Dhrs13</i>        | chr11:78032279-78037866   | 1.4707   | 1.4713   | 0.0006  | 0.996177 |
| <i>Nudt14</i>        | chr12:112934732-112942118 | 15.7518  | 15.7579  | 0.0006  | 0.997547 |
| <i>Mterf3</i>        | chr13:66906967-66933088   | 11.8376  | 11.7626  | -0.0092 | 0.928482 |
| <i>Ttc37</i>         | chr13:76098733-76187983   | 19.6106  | 19.4822  | -0.0095 | 0.930605 |
| <i>Sec13</i>         | chr6:113728066-113740743  | 56.6150  | 55.4012  | -0.0313 | 0.778998 |
| <i>Lrrc23</i>        | chr6:124769862-124779727  | 3.1799   | 3.1888   | 0.0040  | 0.989175 |
| <i>Plaur</i>         | chr7:24462499-24475873    | 4.4281   | 4.4270   | -0.0004 | 0.998064 |
| <i>Abhd17c</i>       | chr7:84109355-84151893    | 5.3349   | 5.2118   | -0.0337 | 0.805640 |
| <i>Hgsnat</i>        | chr8:25944458-25976744    | 15.2619  | 15.1492  | -0.0107 | 0.911421 |
| <i>Ecsit</i>         | chr9:22072245-22085438    | 22.8481  | 22.6901  | -0.0100 | 0.860351 |
| <i>Map2k1</i>        | chr9:64185769-64253631    | 22.9494  | 22.4810  | -0.0298 | 0.720117 |
| <i>Cox7a2</i>        | chr9:79755240-79759853    | 74.3910  | 72.6134  | -0.0349 | 0.861251 |
| <i>Prkx</i>          | chrX:77761410-77796278    | 11.0641  | 10.8371  | -0.0299 | 0.798952 |
| <i>Wnk3</i>          | chrX:151198139-151320152  | 0.6574   | 0.6400   | -0.0387 | 0.849691 |
| <i>B130046B21Rik</i> | chr15:98807031-98816077   | 33.2760  | 33.0246  | -0.0109 | 0.842944 |
| <i>Spryd3</i>        | chr15:102116527-102136234 | 12.1519  | 11.8874  | -0.0317 | 0.759783 |
| <i>Cbx5</i>          | chr15:103191543-103239816 | 17.0495  | 16.7124  | -0.0288 | 0.745638 |
| <i>Gm27017</i>       | chr14:61648949-61667312   | 5.6986   | 5.7247   | 0.0066  | 0.965388 |
| <i>Cln5</i>          | chr14:103070215-103077579 | 20.2870  | 19.8903  | -0.0285 | 0.640014 |
| <i>Chtf18</i>        | chr17:25718925-25727419   | 1.7253   | 1.6783   | -0.0399 | 0.823898 |
| <i>Yipf3</i>         | chr17:46248079-46252537   | 23.4768  | 22.9966  | -0.0298 | 0.738695 |
| <i>Gm21981</i>       | chr17:47686738-47694455   | 6.1923   | 6.1889   | -0.0008 | 0.997371 |
| <i>Gm15342</i>       | chr16:96036089-96038743   | 6.5748   | 6.5647   | -0.0022 | 0.988533 |
| <i>Mrpl43</i>        | chr19:45005013-45006442   | 28.9136  | 28.8141  | -0.0050 | 0.977644 |
| <i>Gbf1</i>          | chr19:46152508-46286510   | 8.5506   | 8.3755   | -0.0299 | 0.786076 |
| <i>Pcmdt1</i>        | chr1:7088919-7173628      | 22.9177  | 22.7728  | -0.0092 | 0.911203 |
| <i>Phf3</i>          | chr1:30802341-30863256    | 39.1453  | 38.8317  | -0.0116 | 0.822073 |
| <i>Trappc8</i>       | chr18:20817223-20896078   | 39.2391  | 38.5140  | -0.0269 | 0.682227 |
| <i>Hdac3</i>         | chr18:37935843-37954988   | 18.9826  | 18.6307  | -0.0270 | 0.487817 |
| <i>Gm4951</i>        | chr18:60212079-60247820   | 1.4849   | 1.3777   | -0.1081 | 0.899026 |
| <i>Cubn</i>          | chr2:13276337-13491924    | 0.1062   | 0.1076   | 0.0192  | 0.952872 |
| <i>Dpm2</i>          | chr2:32570857-32573579    | 13.5644  | 13.2833  | -0.0302 | 0.650903 |
| <i>Ttc16</i>         | chr2:32757025-32775633    | 0.5534   | 0.5539   | 0.0014  | 0.995632 |
| <i>Cir1</i>          | chr2:73283104-73312701    | 2.1805   | 2.1284   | -0.0349 | 0.609146 |
| <i>Slc43a3</i>       | chr2:84936578-84958509    | 1.2266   | 1.1814   | -0.0542 | 0.891087 |
| <i>Eif3m</i>         | chr2:104999655-105017080  | 50.1840  | 49.9917  | -0.0055 | 0.972307 |
| <i>Blvra</i>         | chr2:127070664-127097084  | 7.2646   | 7.0960   | -0.0339 | 0.759575 |
| <i>Trp53tg5</i>      | chr2:164470300-164473724  | 1.7568   | 1.7689   | 0.0099  | 0.979895 |
| <i>Ctso</i>          | chr3:81932600-81956725    | 17.3871  | 17.0090  | -0.0317 | 0.804946 |
| <i>NA</i>            | chr3:88242873-88287210    | 1.2335   | 1.2399   | 0.0075  | 0.975845 |
| <i>Hspb11</i>        | chr4:107253592-107279938  | 5.6654   | 5.5265   | -0.0358 | 0.844192 |
| <i>St3gal3</i>       | chr4:117932153-118134914  | 3.3184   | 3.3121   | -0.0027 | 0.982613 |
| <i>Ppih</i>          | chr4:119300009-119320546  | 5.3602   | 5.2187   | -0.0386 | 0.847344 |
| <i>Exo5</i>          | chr4:120921195-120925017  | 8.8536   | 8.8014   | -0.0085 | 0.924411 |
| <i>Plekhg5</i>       | chr4:152072497-152115400  | 0.5883   | 0.5663   | -0.0550 | 0.866620 |
| <i>Ankra2</i>        | chr13:98263157-98274750   | 12.6197  | 12.5187  | -0.0116 | 0.850082 |
| <i>4930506C21Rik</i> | chr17:8293365-8311080     | 1.6064   | 1.5541   | -0.0477 | 0.860594 |
| <i>Tmem173</i>       | chr18:35733677-35740554   | 55.9990  | 54.9201  | -0.0281 | 0.708251 |
| <i>A430093F15Rik</i> | chr19:10740946-10786043   | 6.9633   | 6.7748   | -0.0396 | 0.831046 |
| <i>Impa2</i>         | chr18:67289252-67319146   | 5.7473   | 5.5874   | -0.0407 | 0.847953 |
| <i>Nsun6</i>         | chr2:14995130-15054884    | 4.7968   | 4.7720   | -0.0075 | 0.952039 |
| <i>Stxbp5</i>        | chr10:9755546-9901079     | 6.9327   | 6.8766   | -0.0117 | 0.837024 |
| <i>Bloc1s5</i>       | chr13:38602708-38635109   | 6.4937   | 6.4709   | -0.0051 | 0.967303 |
| <i>Cycs</i>          | chr6:50562562-50566538    | 4.3550   | 4.3481   | -0.0023 | 0.990744 |
| <i>Neu3</i>          | chr7:99811438-99828417    | 5.3269   | 5.2927   | -0.0093 | 0.946663 |
| <i>Smg1</i>          | chr7:118131307-118243637  | 50.4492  | 50.1309  | -0.0091 | 0.942893 |
| <i>Trappc2l</i>      | chr8:122611625-122615588  | 33.1376  | 32.9679  | -0.0074 | 0.949668 |
| <i>Hmbs</i>          | chr9:44336349-44344228    | 10.3159  | 10.0747  | -0.0341 | 0.757662 |
| <i>Hdac10</i>        | chr15:89123306-89128700   | 6.5296   | 6.3974   | -0.0295 | 0.745157 |
| <i>Vcl</i>           | chr14:20929432-21033673   | 4.4559   | 4.4413   | -0.0047 | 0.977420 |
| <i>D430001F17Rik</i> | chr16:91931236-91962915   | 0.4076   | 0.4197   | 0.0422  | 0.943826 |
| <i>Tm9sf3</i>        | chr19:41210841-41264004   | 76.5033  | 75.1007  | -0.0267 | 0.689068 |
| <i>Stk11ip</i>       | chr1:75521528-75537335    | 8.3698   | 8.3133   | -0.0098 | 0.923278 |
| <i>Asb6</i>          | chr2:30823096-30830333    | 10.5279  | 10.3176  | -0.0291 | 0.718734 |
| <i>Gm4202</i>        | chr3:92689424-92690163    | 1.4299   | 1.4470   | 0.0172  | 0.964790 |
| <i>Slc9b1</i>        | chr3:135348028-135397827  | 0.2381   | 0.2441   | 0.0358  | 0.934852 |
| <i>Pramef8</i>       | chr4:143412425-143421091  | 13.0780  | 12.9701  | -0.0119 | 0.888486 |
| <i>Dusp28</i>        | chr1:92906988-92908620    | 10.1264  | 9.8944   | -0.0334 | 0.819499 |
| <i>Snhg3</i>         | chr4:132348013-132353686  | 603.5447 | 605.7538 | 0.0053  | 0.985769 |
| <i>Gm17673</i>       | chr12:83954498-83984852   | 0.2551   | 0.2426   | -0.0730 | 0.855963 |

|               |                           |          |          |         |          |
|---------------|---------------------------|----------|----------|---------|----------|
| Gm11788       | chr11:120489405-120492394 | 1.8320   | 1.8582   | 0.0205  | 0.948599 |
| Gm13562       | chr2:26352644-26371952    | 9.0355   | 8.8326   | -0.0328 | 0.798544 |
| Gpat2         | chr2:127425198-127436092  | 1.3004   | 1.2610   | -0.0444 | 0.906227 |
| Rabggtb       | chr3:153907288-153912966  | 49.6333  | 48.6308  | -0.0294 | 0.715683 |
| 2810004N23Rik | chr8:124839354-124863029  | 31.4731  | 31.2609  | -0.0098 | 0.926866 |
| Ankzf1        | chr1:75192150-75199387    | 15.7472  | 15.6092  | -0.0127 | 0.872024 |
| Ralgapa2      | chr2:146239878-146512026  | 6.2508   | 6.2041   | -0.0108 | 0.911143 |
| Mpdu1         | chr11:69656696-69662642   | 18.2271  | 18.0731  | -0.0122 | 0.859215 |
| Itga2b        | chr11:102453296-102470122 | 0.5149   | 0.5196   | 0.0131  | 0.953750 |
| Grifin        | chr5:140563118-140565071  | 3.5664   | 3.5786   | 0.0049  | 0.984044 |
| Stx4a         | chr7:127824293-127849019  | 21.0471  | 20.8788  | -0.0116 | 0.836885 |
| F8a           | chrX:73228305-73230795    | 7.4165   | 7.3664   | -0.0098 | 0.804263 |
| Fam134a       | chr1:75142785-75147909    | 29.9848  | 29.4048  | -0.0282 | 0.677989 |
| Adipor1       | chr1:134415377-134433351  | 26.1642  | 25.6628  | -0.0279 | 0.784148 |
| Mettl15       | chr2:109092296-109280748  | 2.7046   | 2.6285   | -0.0412 | 0.804020 |
| Gm13127       | chr4:144587243-144588632  | 1.3988   | 1.3493   | -0.0520 | 0.839577 |
| Braf          | chr6:39603236-39725463    | 6.2683   | 6.2225   | -0.0106 | 0.911657 |
| Clcf1         | chr19:4214237-4223490     | 20.1869  | 20.0393  | -0.0106 | 0.909920 |
| Anxa9         | chr3:95296095-95307176    | 0.4580   | 0.4664   | 0.0263  | 0.943710 |
| Larp1         | chr11:58009063-58062034   | 28.3230  | 28.1527  | -0.0087 | 0.956002 |
| Trmt5         | chr12:73280409-73286711   | 13.5341  | 13.4339  | -0.0107 | 0.929262 |
| Med16         | chr10:79894707-79908923   | 4.6288   | 4.6038   | -0.0078 | 0.963713 |
| Fbxw11        | chr11:32642723-32746816   | 13.5302  | 13.4170  | -0.0121 | 0.856009 |
| Stat5b        | chr11:100780730-100850724 | 33.8281  | 33.2017  | -0.0270 | 0.675583 |
| Polg2         | chr11:106768252-106779537 | 6.1640   | 6.1232   | -0.0096 | 0.932985 |
| Gm11713       | chr11:107410389-107413549 | 1.6091   | 1.6589   | 0.0440  | 0.940676 |
| Sec14l1       | chr11:117115167-117159268 | 4.8208   | 4.7286   | -0.0278 | 0.758316 |
| Cep131        | chr11:120064429-120086827 | 1.9804   | 1.9216   | -0.0435 | 0.841273 |
| Ptch1         | chr13:63511532-63565520   | 8.0513   | 8.0051   | -0.0083 | 0.952718 |
| Lrrc8b        | chr5:105415774-105486189  | 10.4505  | 10.2253  | -0.0314 | 0.845980 |
| Cd8b1         | chr6:71322835-71337477    | 822.5139 | 817.3720 | -0.0090 | 0.944711 |
| Ccdc37        | chr6:90403735-90428797    | 0.2131   | 0.2046   | -0.0586 | 0.791181 |
| Gm26852       | chr7:19382219-19392718    | 3.8606   | 3.8448   | -0.0059 | 0.966795 |
| Sars2         | chr7:28741967-28753879    | 7.9056   | 7.7337   | -0.0317 | 0.727793 |
| Kctd13        | chr7:126928878-126945631  | 5.7337   | 5.7071   | -0.0067 | 0.968212 |
| Ddx39         | chr8:83715176-83726892    | 51.8389  | 51.3706  | -0.0131 | 0.840226 |
| Folr4         | chr9:14885813-14903949    | 13.4498  | 13.0749  | -0.0408 | 0.865809 |
| Clpx          | chr9:65294259-65330658    | 13.0611  | 12.7932  | -0.0299 | 0.720507 |
| Gmppb         | chr9:108049268-108052801  | 16.3294  | 16.1998  | -0.0115 | 0.887345 |
| 1700123O20Rik | chr14:54686170-54690742   | 23.7122  | 23.2453  | -0.0287 | 0.714557 |
| Mttr9         | chr14:63523615-63543953   | 14.2416  | 14.1478  | -0.0095 | 0.938458 |
| Ubash3a       | chr17:31207872-31242202   | 54.9116  | 53.8758  | -0.0275 | 0.727293 |
| Xrb           | chr17:34031811-34038393   | 19.5883  | 19.2151  | -0.0278 | 0.704859 |
| 2510002D24Rik | chr16:18836577-18840158   | 26.0822  | 25.5327  | -0.0307 | 0.799000 |
| Fra10ac1      | chr19:38188480-38224138   | 10.4397  | 10.3960  | -0.0060 | 0.964716 |
| Rrp12         | chr19:41862851-41896153   | 17.1916  | 17.0559  | -0.0114 | 0.873103 |
| Farp2         | chr1:93512078-93621976    | 1.1402   | 1.1436   | 0.0043  | 0.989676 |
| Ap3s1         | chr18:46741916-46790826   | 5.3222   | 5.1987   | -0.0339 | 0.732489 |
| Nsmf          | chr2:25054354-25062881    | 2.5112   | 2.4526   | -0.0341 | 0.848433 |
| Abl1          | chr2:31688375-31804227    | 7.7343   | 7.6783   | -0.0105 | 0.922843 |
| Gm14049       | chr2:130987983-130988619  | 1.3421   | 1.3574   | 0.0163  | 0.962439 |
| Adnp          | chr2:168180985-168207112  | 22.7854  | 22.3006  | -0.0310 | 0.864397 |
| Metap1        | chr3:138458959-138489382  | 27.2086  | 26.9951  | -0.0114 | 0.866708 |
| Otud3         | chr4:138895378-138913945  | 6.6277   | 6.6289   | 0.0003  | 0.998953 |
| Trmt11        | chr10:30534224-30600749   | 13.4195  | 13.3224  | -0.0105 | 0.925805 |
| Zmat5         | chr11:4704677-4737669     | 14.0527  | 13.7251  | -0.0340 | 0.809601 |
| Ogdh          | chr11:6291632-6356642     | 34.5411  | 34.2419  | -0.0126 | 0.887818 |
| Prpsap2       | chr11:61729649-61762088   | 9.1702   | 9.1036   | -0.0105 | 0.886409 |
| Klhl10        | chr11:100441916-100457022 | 0.7204   | 0.7206   | 0.0005  | 0.998122 |
| Fbf1          | chr11:116142284-116168166 | 3.8165   | 3.7358   | -0.0308 | 0.828377 |
| Psmc6         | chr12:55384221-55418454   | 53.6061  | 53.2729  | -0.0090 | 0.945448 |
| 4930586N03Rik | chr13:23313524-23385799   | 2.9893   | 3.0045   | 0.0073  | 0.981138 |
| Med10         | chr13:69809881-69816094   | 36.4722  | 35.7101  | -0.0305 | 0.783505 |
| Sepsecs       | chr5:52640086-52669729    | 6.6517   | 6.5146   | -0.0301 | 0.768097 |
| Hnf1a         | chr5:114948360-114971067  | 1.9113   | 1.8608   | -0.0386 | 0.845959 |
| Pon3          | chr6:5220851-5256286      | 0.3089   | 0.2978   | -0.0527 | 0.921760 |
| Pold1         | chr7:44532745-44548849    | 10.8483  | 10.7617  | -0.0116 | 0.904029 |
| Bcl2l12       | chr7:44991221-44998712    | 14.0386  | 13.7501  | -0.0300 | 0.742897 |
| Gm26981       | chr7:92729839-92733748    | 8.5036   | 8.4485   | -0.0094 | 0.933379 |
| Rsf1os2       | chr7:97650009-97696828    | 2.8466   | 2.7843   | -0.0319 | 0.708719 |
| Copb1         | chr7:114215558-114254680  | 52.3238  | 51.3330  | -0.0276 | 0.724965 |

|                      |                           |           |           |         |          |
|----------------------|---------------------------|-----------|-----------|---------|----------|
| <i>Psm1</i>          | chr7:114264605-114276118  | 48.1002   | 47.7788   | -0.0097 | 0.933357 |
| <i>Cttn1</i>         | chr8:4257647-4259274      | 0.6668    | 0.6389    | -0.0616 | 0.864889 |
| <i>Gm17072</i>       | chr8:81827662-81829275    | 2.0279    | 2.0431    | 0.0108  | 0.978050 |
| <i>Nae1</i>          | chr8:104511027-104534637  | 12.3746   | 12.2939   | -0.0094 | 0.934801 |
| <i>Chordc1</i>       | chr9:18292266-18314000    | 59.0235   | 57.8437   | -0.0291 | 0.855017 |
| <i>Srpr</i>          | chr9:35200174-35247973    | 21.3718   | 20.9697   | -0.0274 | 0.654043 |
| <i>Nat6</i>          | chr9:107578886-107584048  | 3.3256    | 3.2381    | -0.0385 | 0.821976 |
| <i>Prmt5</i>         | chr14:54507186-54517525   | 24.6362   | 24.4099   | -0.0133 | 0.825427 |
| <i>Rnf31</i>         | chr14:55591707-55603693   | 19.7208   | 19.5575   | -0.0120 | 0.919664 |
| <i>Eci1</i>          | chr17:24426682-24439316   | 13.4300   | 13.3449   | -0.0092 | 0.948242 |
| <i>Apobec2</i>       | chr17:48419230-48432728   | 3.3709    | 3.2588    | -0.0488 | 0.826777 |
| <i>Rab31</i>         | chr17:65651725-65772752   | 1.2980    | 1.2948    | -0.0035 | 0.979742 |
| <i>Golgb1</i>        | chr16:36875139-36933085   | 12.9450   | 12.8284   | -0.0131 | 0.809274 |
| <i>Lrp5</i>          | chr19:3584827-3686564     | 0.5702    | 0.5552    | -0.0384 | 0.896391 |
| <i>Slc29a2</i>       | chr19:5024005-5031971     | 0.8025    | 0.8083    | 0.0104  | 0.980196 |
| <i>Rfx3</i>          | chr19:27761720-28011166   | 7.1187    | 7.0636    | -0.0112 | 0.895012 |
| <i>Sema4g</i>        | chr19:44989100-45003397   | 1.1990    | 1.1938    | -0.0063 | 0.958577 |
| <i>Tmem180</i>       | chr19:46341120-46375252   | 0.3162    | 0.3220    | 0.0262  | 0.933073 |
| <i>Picl1</i>         | chr1:55406387-55751802    | 0.6938    | 0.6739    | -0.0420 | 0.919791 |
| <i>Bcl2</i>          | chr1:106538177-106714274  | 77.3692   | 75.8188   | -0.0292 | 0.836769 |
| <i>Fam72a</i>        | chr1:131527902-131539872  | 0.7418    | 0.7180    | -0.0470 | 0.842674 |
| <i>Swt1</i>          | chr1:151367698-151428455  | 7.4934    | 7.4438    | -0.0096 | 0.928031 |
| <i>Gm26685</i>       | chr1:164503306-164514882  | 1.0662    | 1.0763    | 0.0136  | 0.972382 |
| <i>Taf1a</i>         | chr1:183388980-183409353  | 16.3539   | 16.2537   | -0.0089 | 0.915547 |
| <i>Nsl1</i>          | chr1:191063011-191084558  | 1.2500    | 1.2064    | -0.0512 | 0.874690 |
| <i>Camk4</i>         | chr18:32939040-33195767   | 15.0625   | 14.7977   | -0.0256 | 0.694432 |
| <i>Shhg4</i>         | chr18:35553409-35558316   | 13.5463   | 13.4702   | -0.0081 | 0.931106 |
| <i>Ralgds</i>        | chr2:28513124-28553081    | 3.6549    | 3.6510    | -0.0016 | 0.994890 |
| <i>Rcn1</i>          | chr2:105386290-105399319  | 27.7232   | 27.1956   | -0.0277 | 0.698789 |
| <i>Sec62</i>         | chr3:30792875-30821263    | 40.0474   | 39.2683   | -0.0283 | 0.761320 |
| <i>Etfdh</i>         | chr3:79603787-79628863    | 8.8016    | 8.6363    | -0.0274 | 0.625313 |
| <i>Dnali1</i>        | chr4:125055337-125065703  | 1.4207    | 1.4235    | 0.0028  | 0.987032 |
| <i>Snora73a</i>      | chr4:132352774-132352979  | 2802.9729 | 2809.4198 | 0.0033  | 0.991245 |
| <i>Lypla2</i>        | chr4:135968223-135972626  | 31.0137   | 30.8258   | -0.0088 | 0.954578 |
| <i>C030017K20Rik</i> | chr4:155451569-155466530  | 0.2206    | 0.1977    | -0.1579 | 0.925857 |
| <i>Hk1os</i>         | chr10:62340255-62363367   | 0.8347    | 0.8108    | -0.0420 | 0.894253 |
| <i>Zbtb7a</i>        | chr10:81135219-81152995   | 10.0026   | 9.7771    | -0.0329 | 0.886250 |
| <i>Prim1</i>         | chr10:128015167-128030037 | 8.1180    | 7.9462    | -0.0309 | 0.774122 |
| <i>Fndc9</i>         | chr11:4623530-46239872    | 5.5134    | 5.3886    | -0.0330 | 0.874028 |
| <i>Prpf8</i>         | chr11:75486815-75509449   | 74.7230   | 73.9741   | -0.0145 | 0.819918 |
| <i>Gm11719</i>       | chr11:107330707-107331058 | 6.0339    | 5.8611    | -0.0419 | 0.856032 |
| <i>Syng2</i>         | chr11:117809667-117814283 | 19.0949   | 18.6984   | -0.0303 | 0.814238 |
| <i>Kif3c</i>         | chr12:3365131-3406494     | 6.0710    | 6.0332    | -0.0090 | 0.910980 |
| <i>Tmem251</i>       | chr12:102743759-102747561 | 11.0347   | 10.8257   | -0.0276 | 0.598308 |
| <i>Gm9752</i>        | chr13:119473803-119476761 | 16.2425   | 16.1247   | -0.0105 | 0.912096 |
| <i>Mpv17</i>         | chr5:31140659-31158153    | 6.3290    | 6.2034    | -0.0289 | 0.763230 |
| <i>Gm9903</i>        | chr5:33629924-33632092    | 1.1187    | 1.1260    | 0.0094  | 0.971124 |
| <i>Grsf1</i>         | chr5:88659447-88676171    | 18.2350   | 17.9124   | -0.0258 | 0.627106 |
| <i>Ephb6</i>         | chr6:41605481-41620509    | 5.7588    | 5.7121    | -0.0118 | 0.901769 |
| <i>Smyd1</i>         | chr6:71213939-71322233    | 0.7320    | 0.7117    | -0.0407 | 0.893385 |
| <i>Zfp384</i>        | chr6:125009144-125037870  | 6.5430    | 6.4959    | -0.0104 | 0.910904 |
| <i>Nudt19</i>        | chr7:35547184-35556304    | 12.7735   | 12.7016   | -0.0081 | 0.951863 |
| <i>Xpo6</i>          | chr7:126101714-126200501  | 20.8927   | 20.7268   | -0.0115 | 0.915364 |
| <i>Bckdk</i>         | chr7:127904081-127909664  | 15.2276   | 15.1130   | -0.0109 | 0.934771 |
| <i>Prr33</i>         | chr7:142491073-142506771  | 8.7513    | 8.5722    | -0.0298 | 0.822360 |
| <i>Tmco3</i>         | chr8:13288012-13322924    | 3.2693    | 3.2464    | -0.0102 | 0.911931 |
| <i>Klhl2</i>         | chr8:64739862-64849818    | 11.3857   | 11.1824   | -0.0260 | 0.689300 |
| <i>Gm27011</i>       | chr8:121949673-121950645  | 3.4905    | 3.4824    | -0.0033 | 0.986458 |
| <i>Egln1</i>         | chr8:124908595-12494254   | 16.1456   | 15.8584   | -0.0259 | 0.681765 |
| <i>Naalad2</i>       | chr9:18321950-18402995    | 0.3847    | 0.3720    | -0.0484 | 0.912389 |
| <i>Dnm2</i>          | chr9:21424907-21507759    | 72.5976   | 71.9567   | -0.0128 | 0.876472 |
| <i>Ppib</i>          | chr9:66060168-66066629    | 224.6937  | 220.0718  | -0.0300 | 0.832142 |
| <i>Rnf7</i>          | chr9:96470940-96478675    | 18.1511   | 17.7747   | -0.0302 | 0.843479 |
| <i>Nbeal2</i>        | chr9:110624788-110654161  | 22.1012   | 21.9701   | -0.0086 | 0.963986 |
| <i>Pdcd6ip</i>       | chr9:113651743-113708259  | 23.2480   | 23.0486   | -0.0124 | 0.875356 |
| <i>Sash3</i>         | chrX:48146435-48161565    | 190.5209  | 187.2655  | -0.0249 | 0.485490 |
| <i>Hdac8</i>         | chrX:102284638-102505359  | 4.1247    | 4.0916    | -0.0116 | 0.911889 |
| <i>Fgd1</i>          | chrX:151046149-151089521  | 0.8140    | 0.7883    | -0.0462 | 0.832656 |
| <i>Mbtps2</i>        | chrX:157535370-157598715  | 3.7372    | 3.6631    | -0.0289 | 0.813389 |
| <i>Jrk</i>           | chr15:74702411-74709535   | 5.2400    | 5.1981    | -0.0116 | 0.906766 |
| <i>Tmbim6</i>        | chr15:99392881-99410049   | 88.8087   | 87.8918   | -0.0150 | 0.772631 |

|               |                           |          |          |         |          |
|---------------|---------------------------|----------|----------|---------|----------|
| Atxn7         | chr14:14012490-14107296   | 16.2431  | 16.1167  | -0.0113 | 0.898901 |
| Tox4          | chr14:52279145-52296391   | 25.5769  | 25.3416  | -0.0133 | 0.734226 |
| Tmem242       | chr17:5410863-5440260     | 19.3189  | 18.8798  | -0.0332 | 0.856640 |
| 4732491K20Rik | chr17:12318884-12327250   | 0.4032   | 0.4066   | 0.0123  | 0.981737 |
| Unkl          | chr17:25188396-25234443   | 5.9725   | 5.9219   | -0.0123 | 0.868750 |
| Gm26734       | chr17:94834905-94836642   | 1.1141   | 1.1165   | 0.0031  | 0.990456 |
| Top3b         | chr16:16870735-16892990   | 10.8096  | 10.7110  | -0.0132 | 0.874121 |
| Eij4g1        | chr16:20668312-20692884   | 71.0862  | 70.3675  | -0.0147 | 0.776201 |
| Cox15         | chr19:43733253-43753000   | 8.4907   | 8.4218   | -0.0118 | 0.912695 |
| 1700066M21Rik | chr1:57377619-57385423    | 4.9035   | 4.8006   | -0.0306 | 0.815067 |
| Orc2          | chr1:58462770-58505109    | 16.5251  | 16.2132  | -0.0275 | 0.799109 |
| Tpgs2         | chr18:25127222-25169007   | 3.2021   | 3.1823   | -0.0090 | 0.935442 |
| Camk1d        | chr2:5293456-5714515      | 8.9235   | 8.8563   | -0.0109 | 0.929644 |
| Ehmt1         | chr2:24790768-24919609    | 14.4536  | 14.1962  | -0.0259 | 0.682383 |
| Ccdc148       | chr2:58821696-59160683    | 0.2986   | 0.2881   | -0.0520 | 0.842376 |
| Snap23        | chr2:120567670-120601255  | 8.0804   | 8.0451   | -0.0063 | 0.965496 |
| Pde4dip       | chr3:97689823-97888707    | 5.4572   | 5.4255   | -0.0084 | 0.947402 |
| Tceanc2       | chr4:107134154-107179116  | 6.9335   | 6.7972   | -0.0286 | 0.805778 |
| Mcmdc2        | chr1:9908637-9942085      | 1.8598   | 1.8160   | -0.0344 | 0.823315 |
| Slc27a4       | chr2:29802633-29817522    | 5.6506   | 5.5380   | -0.0290 | 0.754523 |
| A530072M11Rik | chr4:16164109-16266225    | 1.9765   | 1.9712   | -0.0039 | 0.986546 |
| Zcchc6        | chr13:59771878-59823147   | 49.5944  | 49.1132  | -0.0141 | 0.723953 |
| Csf2ra        | chr19:61224401-61228418   | 1.2016   | 1.1615   | -0.0490 | 0.844541 |
| Klrf1         | chr6:129610322-129623864  | 20.0912  | 20.0027  | -0.0064 | 0.978790 |
| 4931406P16Rik | chr7:34236706-34313551    | 11.3562  | 11.1495  | -0.0265 | 0.775221 |
| 2310043M15Rik | chr16:93792149-93794888   | 1.2106   | 1.2140   | 0.0041  | 0.986932 |
| 6330549D23Rik | chr3:96606658-96629820    | 0.7931   | 0.7933   | 0.0003  | 0.999303 |
| Gstm1         | chr3:108012254-108017973  | 0.6477   | 0.6608   | 0.0288  | 0.960721 |
| Rpl22         | chr4:152325741-152334071  | 104.3983 | 101.6769 | -0.0381 | 0.874153 |
| Etnk1         | chr6:143167229-143208542  | 56.0105  | 54.9351  | -0.0280 | 0.823983 |
| Lcp1          | chr14:75131100-75230842   | 120.6411 | 118.5292 | -0.0255 | 0.706730 |
| D930007J09Rik | chr13:32802456-32802849   | 18.3590  | 18.3434  | -0.0012 | 0.995301 |
| Gtf2h5        | chr17:6079785-6086517     | 7.8692   | 7.8096   | -0.0110 | 0.921058 |
| Tbc1d22b      | chr17:29549787-29606895   | 14.1327  | 14.0406  | -0.0094 | 0.950436 |
| Lrp11         | chr10:7589799-7625483     | 0.6609   | 0.6637   | 0.0060  | 0.980062 |
| Zfc3h1        | chr10:115384958-115432772 | 35.8261  | 35.1991  | -0.0255 | 0.768112 |
| Lap3          | chr5:45493373-45512674    | 10.1404  | 9.9254   | -0.0309 | 0.835487 |
| Rfc5          | chr5:117378102-117389047  | 8.4430   | 8.2812   | -0.0279 | 0.713605 |
| Mrps25        | chr6:92169524-92184033    | 19.5997  | 19.4147  | -0.0137 | 0.804170 |
| Pcf11         | chr7:92643711-92669933    | 50.1282  | 49.6852  | -0.0128 | 0.843826 |
| Rab6a         | chr7:100607409-100641268  | 20.0151  | 19.6762  | -0.0246 | 0.623728 |
| Ate1          | chr7:130391525-130519961  | 16.9204  | 16.6274  | -0.0252 | 0.576723 |
| Slc27a1       | chr8:71568926-71586708    | 2.0924   | 2.0426   | -0.0347 | 0.858170 |
| Gm17344       | chr8:109859983-109868455  | 16.6539  | 16.5283  | -0.0109 | 0.884012 |
| Tcaim         | chr9:122805538-122836334  | 8.2306   | 8.1604   | -0.0124 | 0.897685 |
| Rbm3os        | chrX:8145428-8147964      | 4.0427   | 4.0308   | -0.0042 | 0.971524 |
| Adsl          | chr15:80948489-80970947   | 20.6721  | 20.3104  | -0.0255 | 0.427117 |
| Trav7-3       | chr14:53443248-53443838   | 2.0854   | 2.0067   | -0.0555 | 0.873363 |
| Gm7535        | chr17:17911038-17911947   | 1.1663   | 1.1258   | -0.0509 | 0.883358 |
| Ndufs2        | chr1:171234852-171247122  | 60.7024  | 59.5703  | -0.0272 | 0.730689 |
| Gm1305        | chr1:179695296-179745185  | 1.1353   | 1.1437   | 0.0107  | 0.972252 |
| Snrnp200      | chr2:127208385-127240451  | 54.1870  | 53.6357  | -0.0148 | 0.739921 |
| Dbt           | chr3:116513069-116549976  | 9.0025   | 8.8401   | -0.0263 | 0.561677 |
| Rragd         | chr4:32983036-33022180    | 1.6453   | 1.6128   | -0.0288 | 0.885960 |
| Sdhd          | chr4:140961202-140979193  | 40.3914  | 40.0738  | -0.0114 | 0.924749 |
| Rnf4          | chr5:34336288-34355629    | 26.2005  | 25.9499  | -0.0139 | 0.824815 |
| Yipf6         | chrX:98936315-98949017    | 10.9291  | 10.7379  | -0.0255 | 0.666216 |
| Mapk8         | chr14:33377897-33447158   | 6.4913   | 6.3693   | -0.0274 | 0.746448 |
| Fig4          | chr10:41188171-41303241   | 16.7880  | 16.6416  | -0.0126 | 0.859743 |
| Anxa6         | chr11:54979107-55033445   | 327.9376 | 321.9655 | -0.0265 | 0.725028 |
| Nat14         | chr7:4922250-4925006      | 0.6702   | 0.6820   | 0.0252  | 0.940988 |
| Rpl29         | chr9:106429453-106431568  | 20.8291  | 20.3926  | -0.0306 | 0.864429 |
| Cby1          | chr15:79659226-79667660   | 6.5235   | 6.5039   | -0.0043 | 0.977593 |
| Uchl3         | chr14:101653966-101696124 | 18.0983  | 17.9968  | -0.0081 | 0.949903 |
| Rbm15         | chr3:107326109-107333289  | 24.3483  | 24.1177  | -0.0137 | 0.852304 |
| 1500011B03Rik | chr5:114808195-114813976  | 11.9587  | 11.7068  | -0.0307 | 0.858097 |
| Use1          | chr8:71366847-71369732    | 49.3235  | 49.0190  | -0.0089 | 0.956654 |
| Brix1         | chr15:10474778-10485947   | 17.6234  | 17.2905  | -0.0275 | 0.793440 |
| Trmt10a       | chr3:138143447-138159821  | 2.5466   | 2.4946   | -0.0297 | 0.786743 |
| Bcl2l13       | chr6:120836229-120892842  | 8.0504   | 7.9838   | -0.0120 | 0.864639 |
| 2410015M20Rik | chr17:56607451-56609771   | 57.8349  | 56.6453  | -0.0300 | 0.859635 |

|                      |                           |           |           |         |          |
|----------------------|---------------------------|-----------|-----------|---------|----------|
| <i>Mif4gd</i>        | chr11:115607917-115612969 | 16.0766   | 15.7888   | -0.0261 | 0.796111 |
| <i>Trim46</i>        | chr3:89234176-89246309    | 0.6706    | 0.6721    | 0.0032  | 0.992525 |
| <i>Zkscan17</i>      | chr11:5948519-59526751    | 7.3731    | 7.3170    | -0.0110 | 0.944973 |
| <i>Rab24</i>         | chr13:55319222-55321980   | 26.3634   | 26.1463   | -0.0119 | 0.910602 |
| <i>Ldoc1l</i>        | chr15:84553397-84557823   | 3.8127    | 3.7253    | -0.0335 | 0.887178 |
| <i>Ifnar2</i>        | chr16:91372782-91405589   | 37.6288   | 37.2370   | -0.0151 | 0.706488 |
| <i>Tmprss9</i>       | chr10:80879719-80899441   | 0.6072    | 0.5917    | -0.0373 | 0.803909 |
| <i>Gm12207</i>       | chr11:52233723-52236619   | 8.2565    | 8.2585    | 0.0004  | 0.999019 |
| <i>Slc25a19</i>      | chr11:115614177-115628295 | 7.4897    | 7.3538    | -0.0264 | 0.754980 |
| <i>Sap30bpos</i>     | chr11:115946449-115952105 | 0.9933    | 0.9939    | 0.0009  | 0.994795 |
| <i>Plek2</i>         | chr12:78888690-78906964   | 1.3300    | 1.2926    | -0.0411 | 0.931181 |
| <i>Gm17122</i>       | chr5:113842600-113843116  | 34.4649   | 34.3411   | -0.0052 | 0.975935 |
| <i>Ncor2</i>         | chr5:125017152-125179219  | 2.8605    | 2.8020    | -0.0298 | 0.897541 |
| <i>Mpp6</i>          | chr6:50110240-50198598    | 8.6525    | 8.4927    | -0.0269 | 0.813693 |
| <i>1700058P15Rik</i> | chr7:19258491-19259739    | 16.4929   | 16.0453   | -0.0397 | 0.891512 |
| <i>Dpy19l3</i>       | chr7:35685164-35754454    | 2.3249    | 2.2756    | -0.0309 | 0.794340 |
| <i>2810428l15Rik</i> | chr8:70504291-70506752    | 9.4019    | 9.1972    | -0.0318 | 0.849775 |
| <i>Gm8606</i>        | chrX:155504036-155504924  | 2.3139    | 2.2340    | -0.0507 | 0.923924 |
| <i>Khsrp</i>         | chr17:57021057-57031507   | 20.8870   | 20.4788   | -0.0285 | 0.842237 |
| <i>Ttc27</i>         | chr17:74717749-74863570   | 23.2517   | 22.8077   | -0.0278 | 0.773739 |
| <i>Gm15591</i>       | chr16:45736502-45737318   | 3.8314    | 3.8302    | -0.0004 | 0.998082 |
| <i>Snhg1</i>         | chr19:8723495-8726442     | 52.1389   | 51.7648   | -0.0104 | 0.950852 |
| <i>NA</i>            | chr1:60703917-60705656    | 4.3179    | 4.2132    | -0.0354 | 0.834618 |
| <i>Ralb</i>          | chr1:119470304-119504794  | 1.7205    | 1.7135    | -0.0059 | 0.979765 |
| <i>Gm16304</i>       | chr1:139133890-139134665  | 2.6914    | 2.6251    | -0.0360 | 0.869808 |
| <i>Acbd6</i>         | chr1:155558119-155687233  | 12.4253   | 12.3741   | -0.0060 | 0.976764 |
| <i>Zfp191</i>        | chr18:24009701-24020810   | 15.7101   | 15.5718   | -0.0128 | 0.872891 |
| <i>Rfxap</i>         | chr3:54803114-54807791    | 9.6223    | 9.4478    | -0.0264 | 0.639267 |
| <i>Gm16540</i>       | chr3:90057258-90058380    | 2.6566    | 2.6794    | 0.0123  | 0.959315 |
| <i>Orc1</i>          | chr4:108579422-108614833  | 0.9949    | 0.9920    | -0.0042 | 0.977968 |
| <i>Megf11</i>        | chr9:64385625-64709205    | 1.0964    | 1.0711    | -0.0336 | 0.911192 |
| <i>Exosc8</i>        | chr3:54728677-54735393    | 22.9253   | 22.5164   | -0.0260 | 0.705221 |
| <i>Atp6v0c</i>       | chr17:24163865-24169702   | 1.8206    | 1.8113    | -0.0074 | 0.955894 |
| <i>Nin</i>           | chr12:70011434-70111925   | 38.8050   | 38.1330   | -0.0252 | 0.755945 |
| <i>Gm5578</i>        | chr6:112605543-112606779  | 1.1175    | 1.1300    | 0.0161  | 0.955652 |
| <i>Arhgef6</i>       | chrX:57231484-57338729    | 31.9819   | 31.6676   | -0.0143 | 0.763897 |
| <i>Rbm18</i>         | chr2:36116078-36136773    | 7.2688    | 7.2016    | -0.0134 | 0.786174 |
| <i>Mcoln2</i>        | chr3:146149832-146195513  | 10.6990   | 10.4715   | -0.0310 | 0.848721 |
| <i>Ojfr99</i>        | chr17:37279500-37280418   | 8.2084    | 8.0393    | -0.0300 | 0.814130 |
| <i>Kctd11</i>        | chr11:69878264-69880985   | 0.8807    | 0.8832    | 0.0041  | 0.988738 |
| <i>NA</i>            | chr11:76179670-76214816   | 8.1068    | 7.9496    | -0.0283 | 0.769084 |
| <i>Tti2</i>          | chr8:31150315-31164702    | 17.5300   | 17.3507   | -0.0148 | 0.734592 |
| <i>Plekho2</i>       | chr9:65554385-65580040    | 15.7072   | 15.4082   | -0.0277 | 0.806087 |
| <i>Gm17082</i>       | chr14:122121552-122122643 | 0.8198    | 0.7877    | -0.0576 | 0.890803 |
| <i>Gstcd</i>         | chr3:132981752-133092033  | 4.8623    | 4.7699    | -0.0277 | 0.775069 |
| <i>Gm13152</i>       | chr4:147492416-147513486  | 0.7898    | 0.8015    | 0.0213  | 0.967651 |
| <i>Dok1</i>          | chr6:83030933-83033471    | 13.1428   | 12.8961   | -0.0273 | 0.731162 |
| <i>Maz</i>           | chr7:127022142-127026479  | 44.8931   | 44.1187   | -0.0251 | 0.771524 |
| <i>Fmn13</i>         | chr15:99317224-99370482   | 7.9636    | 7.8895    | -0.0135 | 0.904228 |
| <i>E030030l06Rik</i> | chr10:22113049-22148823   | 1.7199    | 1.6813    | -0.0328 | 0.854435 |
| <i>Hmgb1-ps8</i>     | chr10:22262741-22263367   | 100.8589  | 99.4848   | -0.0198 | 0.842385 |
| <i>Snora33</i>       | chr10:23785346-23785475   | 53.1346   | 52.6399   | -0.0135 | 0.946756 |
| <i>Hddc2</i>         | chr10:31313381-31328204   | 7.1151    | 7.0226    | -0.0189 | 0.878609 |
| <i>Gm26464</i>       | chr10:42820462-42820767   | 2.4684    | 2.4146    | -0.0318 | 0.927848 |
| <i>Gm16998</i>       | chr10:54075921-54081081   | 0.7396    | 0.7347    | -0.0095 | 0.976771 |
| <i>Msl3l2</i>        | chr10:56106916-56116880   | 2.6829    | 2.6583    | -0.0133 | 0.965594 |
| <i>4632428N05Rik</i> | chr10:60346850-60372684   | 140.0660  | 138.5231  | -0.0160 | 0.864741 |
| <i>Ddt</i>           | chr10:75771229-75773414   | 17.7927   | 17.6988   | -0.0076 | 0.967267 |
| <i>Gm20441</i>       | chr10:75771450-75780954   | 7.6403    | 7.6067    | -0.0064 | 0.979059 |
| <i>Plekhl1</i>       | chr10:80796099-80798626   | 32.1047   | 31.6160   | -0.0221 | 0.790281 |
| <i>Mir1982</i>       | chr10:80828796-80828870   | 19.2594   | 18.7818   | -0.0362 | 0.817546 |
| <i>Eef2</i>          | chr10:81176630-81182507   | 1353.2668 | 1333.5046 | -0.0212 | 0.888704 |
| <i>Pip5k1c</i>       | chr10:81292962-81319973   | 15.3440   | 15.2268   | -0.0111 | 0.943225 |
| <i>Mfsd12</i>        | chr10:81357490-81366225   | 2.9865    | 2.9371    | -0.0241 | 0.895333 |
| <i>Fzr1</i>          | chr10:81366221-81378516   | 6.8474    | 6.7801    | -0.0142 | 0.902213 |
| <i>BC025920</i>      | chr10:81606269-81620703   | 4.1700    | 4.1275    | -0.0148 | 0.916838 |
| <i>1190007l07Rik</i> | chr10:82619850-82623196   | 8.9111    | 8.7357    | -0.0287 | 0.851335 |
| <i>Nfyb</i>          | chr10:82748700-82764144   | 13.5226   | 13.4046   | -0.0126 | 0.916492 |
| <i>Tmem263</i>       | chr10:85102626-85117747   | 7.1958    | 7.1080    | -0.0177 | 0.747822 |
| <i>A230060F14Rik</i> | chr10:86021779-86022325   | 3.7962    | 3.8085    | 0.0046  | 0.987769 |
| <i>BC030307</i>      | chr10:86705810-86776843   | 0.7285    | 0.7279    | -0.0012 | 0.996097 |

|                      |                           |          |          |         |          |
|----------------------|---------------------------|----------|----------|---------|----------|
| <i>Uhrf1bp1</i>      | chr10:89744990-89819869   | 17.1761  | 16.9632  | -0.0180 | 0.807730 |
| <i>Fgd6</i>          | chr10:94036000-94145339   | 1.0373   | 1.0204   | -0.0237 | 0.812810 |
| <i>Tmtc3</i>         | chr10:100443901-100487350 | 0.2751   | 0.2754   | 0.0016  | 0.994652 |
| <i>Nap1l1</i>        | chr10:111473191-111498142 | 15.9856  | 15.7302  | -0.0232 | 0.633499 |
| <i>Cpsf6</i>         | chr10:117344672-117380015 | 31.8576  | 31.4937  | -0.0166 | 0.747237 |
| <i>Lemd3</i>         | chr10:120923412-120979332 | 13.3923  | 13.2341  | -0.0171 | 0.832949 |
| <i>Mir546</i>        | chr10:126998439-126998560 | 41.8553  | 41.5194  | -0.0116 | 0.960648 |
| <i>Gm20492</i>       | chr10:127288513-127289681 | 2.7605   | 2.7287   | -0.0168 | 0.970727 |
| <i>Baz2a</i>         | chr10:128092782-128129303 | 18.7699  | 18.5476  | -0.0172 | 0.905510 |
| <i>Cnpy2</i>         | chr10:128322458-128327187 | 20.9142  | 20.4328  | -0.0336 | 0.838068 |
| <i>Myl6</i>          | chr10:128490859-128493875 | 114.6512 | 113.8150 | -0.0106 | 0.951174 |
| <i>2210015D19Rik</i> | chr11:5762128-5784710     | 4.0475   | 3.9769   | -0.0254 | 0.796813 |
| <i>Wdr92</i>         | chr11:17182106-17233796   | 23.1364  | 22.8756  | -0.0164 | 0.811172 |
| <i>Etaa1</i>         | chr11:17938755-17953875   | 7.1685   | 7.0911   | -0.0157 | 0.844982 |
| <i>Gm20456</i>       | chr11:22839298-22842604   | 2.2511   | 2.2307   | -0.0131 | 0.975510 |
| <i>Vrk2</i>          | chr11:26471321-26593999   | 5.8909   | 5.7888   | -0.0252 | 0.784001 |
| <i>Smek2</i>         | chr11:29172889-29220797   | 67.4201  | 66.3048  | -0.0241 | 0.783556 |
| <i>Kcnmb1</i>        | chr11:33963012-33973641   | 0.6159   | 0.6125   | -0.0080 | 0.983946 |
| <i>Cnng1</i>         | chr11:40748551-40755311   | 66.0404  | 65.3467  | -0.0152 | 0.882184 |
| <i>Snord95</i>       | chr11:48803138-48803206   | 44.0188  | 43.5271  | -0.0162 | 0.944412 |
| <i>Olfr56</i>        | chr11:48978888-49135387   | 2.2704   | 2.2266   | -0.0281 | 0.889144 |
| <i>Cnot6</i>         | chr11:49671502-49712723   | 21.9404  | 21.5365  | -0.0268 | 0.847506 |
| <i>Canx</i>          | chr11:50293960-50325673   | 103.6237 | 102.2724 | -0.0189 | 0.846927 |
| <i>Uqcrc</i>         | chr11:53427921-53430831   | 11.6269  | 11.4925  | -0.0168 | 0.925365 |
| <i>Ccdc69</i>        | chr11:55049730-55078131   | 19.4476  | 19.1302  | -0.0237 | 0.778223 |
| <i>Tom1l2</i>        | chr11:60226713-60352905   | 3.1557   | 3.1123   | -0.0200 | 0.903962 |
| <i>Drg2</i>          | chr11:60454590-60468754   | 16.7768  | 16.6064  | -0.0147 | 0.800642 |
| <i>Miej2</i>         | chr11:60728397-60732951   | 7.6850   | 7.5869   | -0.0185 | 0.842680 |
| <i>Lrrc7saos2</i>    | chr11:62605765-62607748   | 3.9730   | 3.8780   | -0.0349 | 0.783482 |
| <i>9630013K17Rik</i> | chr11:63964225-63968040   | 3.4814   | 3.4352   | -0.0193 | 0.923446 |
| <i>Adprm</i>         | chr11:67037904-67052594   | 14.2293  | 13.9641  | -0.0271 | 0.775917 |
| <i>Chd3</i>          | chr11:69343272-69369406   | 75.4887  | 74.2681  | -0.0235 | 0.859355 |
| <i>Spag7</i>         | chr11:70663770-70669416   | 24.1578  | 23.6917  | -0.0281 | 0.847002 |
| <i>Camta2</i>        | chr11:70669462-70688105   | 4.1412   | 4.0840   | -0.0201 | 0.920307 |
| <i>Mettl16</i>       | chr11:74770829-74828525   | 5.3240   | 5.2748   | -0.0134 | 0.843540 |
| <i>Efcab5</i>        | chr11:77089914-77188968   | 0.2628   | 0.2559   | -0.0388 | 0.882021 |
| <i>Took1</i>         | chr11:77529161-77607815   | 29.8228  | 29.5166  | -0.0149 | 0.872756 |
| <i>Poldip2</i>       | chr11:78512192-78522736   | 9.8284   | 9.7343   | -0.0139 | 0.826881 |
| <i>Tmem97</i>        | chr11:78541816-78550777   | 4.2930   | 4.2150   | -0.0265 | 0.851305 |
| <i>Fndc8</i>         | chr11:82892123-82900801   | 0.9449   | 0.9525   | 0.0117  | 0.973134 |
| <i>Mrm1</i>          | chr11:84813060-84819515   | 14.2815  | 14.1257  | -0.0158 | 0.844323 |
| <i>Znhit3</i>        | chr11:84910949-84916366   | 4.6400   | 4.5929   | -0.0147 | 0.886566 |
| <i>Mtmt4</i>         | chr11:87592161-87616302   | 8.6907   | 8.5542   | -0.0228 | 0.732983 |
| <i>Cuedc1</i>        | chr11:88098057-88194140   | 1.1444   | 1.1420   | -0.0030 | 0.991008 |
| <i>Tac4</i>          | chr11:95261528-95269265   | 1.4745   | 1.4292   | -0.0450 | 0.894531 |
| <i>Gm11537</i>       | chr11:96766801-96768269   | 7.6608   | 7.4806   | -0.0343 | 0.888992 |
| <i>Tbkbp1</i>        | chr11:97136170-97151495   | 0.3011   | 0.2948   | -0.0304 | 0.943851 |
| <i>E130012A19Rik</i> | chr11:97627392-97629716   | 2.5756   | 2.5279   | -0.0270 | 0.915585 |
| <i>Mien1</i>         | chr11:98437707-98438991   | 38.3006  | 37.6997  | -0.0228 | 0.871500 |
| <i>Stat3</i>         | chr11:100885097-100939540 | 31.0472  | 30.6590  | -0.0182 | 0.832093 |
| <i>Wnk4</i>          | chr11:101260566-101277409 | 0.7892   | 0.7679   | -0.0396 | 0.896232 |
| <i>Aoc2</i>          | chr11:101325062-101329702 | 5.3912   | 5.2811   | -0.0298 | 0.866280 |
| <i>Brcal</i>         | chr11:101488763-101551955 | 2.5799   | 2.5433   | -0.0206 | 0.924143 |
| <i>Rundc3a</i>       | chr11:102393402-102402555 | 3.1873   | 3.1217   | -0.0300 | 0.876662 |
| <i>Gpatch8</i>       | chr11:102475914-102556392 | 13.2805  | 13.0802  | -0.0219 | 0.743147 |
| <i>Eftud2</i>        | chr11:102838472-102880985 | 12.2548  | 12.0644  | -0.0226 | 0.642560 |
| <i>Gm20511</i>       | chr11:103190709-103192896 | 21.6714  | 21.3228  | -0.0234 | 0.864295 |
| <i>C130046K22Rik</i> | chr11:103697723-103722832 | 2.0236   | 1.9946   | -0.0209 | 0.940174 |
| <i>Kansl1</i>        | chr11:104333228-104468861 | 19.9296  | 19.7231  | -0.0150 | 0.789356 |
| <i>Ftsj3</i>         | chr11:106249141-106256079 | 50.2768  | 49.4466  | -0.0240 | 0.693657 |
| <i>Arsg</i>          | chr11:109473373-109573330 | 1.0104   | 0.9976   | -0.0185 | 0.963995 |
| <i>Cog1</i>          | chr11:113649168-113667054 | 14.8415  | 14.6677  | -0.0170 | 0.745883 |
| <i>Tmem104</i>       | chr11:115187486-115247023 | 1.8965   | 1.8828   | -0.0105 | 0.957222 |
| <i>Ict1os</i>        | chr11:115406585-115408314 | 6.2611   | 6.2092   | -0.0120 | 0.960345 |
| <i>Gm25364</i>       | chr11:115601655-115601762 | 7.5507   | 7.3631   | -0.0363 | 0.885806 |
| <i>Ten1</i>          | chr11:116198854-116215318 | 7.6643   | 7.5146   | -0.0285 | 0.869088 |
| <i>BC100451</i>      | chr11:118332359-118342500 | 1.0076   | 1.0023   | -0.0076 | 0.974846 |
| <i>Chmp6</i>         | chr11:119913440-119919548 | 11.9185  | 11.7513  | -0.0204 | 0.839396 |
| <i>Enthd2</i>        | chr11:120090530-120098731 | 10.1962  | 10.0400  | -0.0223 | 0.722252 |
| <i>Gm23419</i>       | chr11:120346735-120346819 | 25.8190  | 25.3561  | -0.0261 | 0.929328 |
| <i>Oxld1</i>         | chr11:120456605-120458068 | 6.8909   | 6.8323   | -0.0123 | 0.955885 |

|                      |                           |          |          |         |          |
|----------------------|---------------------------|----------|----------|---------|----------|
| <i>Arhgdia</i>       | chr11:120578103-120581624 | 75.5548  | 74.8246  | -0.0140 | 0.921482 |
| <i>B3gnt1</i>        | chr11:121616196-121673153 | 9.9580   | 9.8056   | -0.0223 | 0.838326 |
| <i>Wdr35</i>         | chr12:8973891-9028847     | 0.4188   | 0.4068   | -0.0419 | 0.849426 |
| <i>Nbas</i>          | chr12:13269126-13583810   | 11.0419  | 10.9143  | -0.0168 | 0.893476 |
| <i>Taf1b</i>         | chr12:24498580-24558571   | 25.8782  | 25.3837  | -0.0278 | 0.756125 |
| <i>Trappc6b</i>      | chr12:59043092-59061461   | 24.6706  | 24.2344  | -0.0257 | 0.809400 |
| <i>Dnaaf2</i>        | chr12:69189086-69198429   | 10.3689  | 10.2376  | -0.0184 | 0.811664 |
| <i>4931403G20Rik</i> | chr12:69847634-69853671   | 0.4312   | 0.4204   | -0.0366 | 0.896062 |
| <i>Jkamp</i>         | chr12:72085588-72101461   | 8.1280   | 8.0425   | -0.0153 | 0.839207 |
| <i>Sipa11</i>        | chr12:82170015-82451782   | 17.1557  | 16.8801  | -0.0234 | 0.823347 |
| <i>Acot6</i>         | chr12:84100653-84111349   | 1.6002   | 1.5735   | -0.0243 | 0.789234 |
| <i>Fam161b</i>       | chr12:84345308-84361833   | 0.4678   | 0.4568   | -0.0343 | 0.841511 |
| <i>Ahsa1</i>         | chr12:87266745-87273997   | 83.9141  | 82.9806  | -0.0161 | 0.911030 |
| <i>Calm1</i>         | chr12:100199434-100209806 | 174.0866 | 172.1177 | -0.0164 | 0.885599 |
| <i>Gm21971</i>       | chr12:102673016-102727333 | 3.1105   | 3.0777   | -0.0153 | 0.955504 |
| <i>Ankrd9</i>        | chr12:110975352-110979040 | 1.3204   | 1.3001   | -0.0223 | 0.891450 |
| <i>Snora28</i>       | chr12:111540940-111541067 | 29.4137  | 29.4162  | 0.0001  | 0.999712 |
| <i>Klc1</i>          | chr12:111758848-111807844 | 14.8956  | 14.7622  | -0.0130 | 0.894174 |
| <i>Actn2</i>         | chr13:12269425-12340760   | 5.7224   | 5.6365   | -0.0218 | 0.922543 |
| <i>Abt1</i>          | chr13:23421538-23423866   | 16.2082  | 16.0247  | -0.0164 | 0.921277 |
| <i>Gpld1</i>         | chr13:24943151-24990753   | 4.3393   | 4.2666   | -0.0244 | 0.875509 |
| <i>Sox4</i>          | chr13:28948918-28953713   | 5.8195   | 5.7682   | -0.0128 | 0.947894 |
| <i>Wrnip1</i>        | chr13:32802037-32822609   | 26.0393  | 25.6249  | -0.0231 | 0.804912 |
| <i>Tmem14c</i>       | chr13:41016249-41022575   | 45.8844  | 45.4697  | -0.0131 | 0.926032 |
| <i>Mcur1</i>         | chr13:43538411-43560191   | 8.2441   | 8.1131   | -0.0231 | 0.687260 |
| <i>Tpmt</i>          | chr13:47025169-47044737   | 0.8359   | 0.8218   | -0.0246 | 0.908231 |
| <i>Phf2os1</i>       | chr13:48871111-48875460   | 6.0150   | 5.8949   | -0.0291 | 0.908870 |
| <i>Sema4d</i>        | chr13:51701245-51793747   | 22.5753  | 22.2983  | -0.0178 | 0.937094 |
| <i>H2afy</i>         | chr13:56073618-56136361   | 48.7087  | 48.1849  | -0.0156 | 0.808382 |
| <i>Zfp874a</i>       | chr13:67424548-67451624   | 6.7193   | 6.6820   | -0.0080 | 0.954817 |
| <i>Zfp493</i>        | chr13:67779753-67792512   | 2.2164   | 2.1780   | -0.0253 | 0.763712 |
| <i>Tert</i>          | chr13:73627000-73649041   | 0.6985   | 0.6954   | -0.0064 | 0.986537 |
| <i>Trip13</i>        | chr13:73912461-73937767   | 1.0985   | 1.0857   | -0.0168 | 0.952689 |
| <i>Ccdc127</i>       | chr13:74350308-74365783   | 6.4261   | 6.3221   | -0.0236 | 0.703955 |
| <i>Pou5f2</i>        | chr13:78022912-78026296   | 2.2264   | 2.1929   | -0.0219 | 0.936319 |
| <i>Ccnh</i>          | chr13:85189407-85223469   | 19.4857  | 19.2836  | -0.0150 | 0.853213 |
| <i>Xrcc4</i>         | chr13:89774026-90089608   | 7.7631   | 7.6768   | -0.0161 | 0.890126 |
| <i>Homer1</i>        | chr13:93303756-93404129   | 2.5703   | 2.5338   | -0.0206 | 0.881704 |
| <i>Jmy</i>           | chr13:93430096-93499808   | 6.7421   | 6.6306   | -0.0240 | 0.843628 |
| <i>Gbbp1</i>         | chr13:111425679-111490111 | 70.2355  | 69.7003  | -0.0110 | 0.931965 |
| <i>Slc38a9</i>       | chr13:112660765-112738743 | 5.3695   | 5.3002   | -0.0187 | 0.781380 |
| <i>Skiv2l2</i>       | chr13:112867779-112927380 | 39.4211  | 38.9152  | -0.0186 | 0.696131 |
| <i>Itga2</i>         | chr13:114835915-114932041 | 1.6167   | 1.6028   | -0.0124 | 0.963093 |
| <i>3110070M22Rik</i> | chr13:119487260-119488383 | 0.7891   | 0.7802   | -0.0163 | 0.965292 |
| <i>NA</i>            | chr5:5781529-5783607      | 1.2707   | 1.2536   | -0.0195 | 0.941139 |
| <i>Gm26825</i>       | chr5:5781529-5783636      | 1.3033   | 1.2857   | -0.0195 | 0.941139 |
| <i>Napepld</i>       | chr5:21662900-21701396    | 2.6059   | 2.5715   | -0.0191 | 0.861788 |
| <i>Tomm7</i>         | chr5:23838943-23844161    | 42.3729  | 41.6249  | -0.0257 | 0.906297 |
| <i>Prkag2os1</i>     | chr5:24902568-24906850    | 1.2834   | 1.2600   | -0.0265 | 0.928672 |
| <i>Nom1</i>          | chr5:29434663-29453506    | 17.1082  | 16.8024  | -0.0260 | 0.750025 |
| <i>Ept1</i>          | chr5:30232580-30272012    | 5.3662   | 5.2913   | -0.0203 | 0.859102 |
| <i>4930566F21Rik</i> | chr5:31486628-31495179    | 1.1472   | 1.1365   | -0.0135 | 0.969740 |
| <i>Fam53a</i>        | chr5:33600350-33629635    | 9.0198   | 8.9112   | -0.0175 | 0.838189 |
| <i>Add1</i>          | chr5:34573663-34632308    | 79.1278  | 78.2338  | -0.0164 | 0.819941 |
| <i>Mfsd10</i>        | chr5:34633641-34637212    | 6.8059   | 6.6911   | -0.0245 | 0.913436 |
| <i>Msantd1</i>       | chr5:34915914-34923839    | 0.7856   | 0.7633   | -0.0414 | 0.914016 |
| <i>9230114K14Rik</i> | chr5:52190680-52197984    | 0.9162   | 0.8907   | -0.0408 | 0.758970 |
| <i>Anapc4</i>        | chr5:52834014-52867797    | 15.6307  | 15.3540  | -0.0258 | 0.695576 |
| <i>Bend4</i>         | chr5:67392146-67427799    | 13.0301  | 12.9290  | -0.0112 | 0.942395 |
| <i>Tec</i>           | chr5:72755717-72868483    | 14.8038  | 14.5968  | -0.0203 | 0.788131 |
| <i>Gm9870</i>        | chr5:72914295-72914942    | 8.7208   | 8.5697   | -0.0252 | 0.920551 |
| <i>Fryl</i>          | chr5:73020321-73256618    | 36.6434  | 35.9819  | -0.0263 | 0.874023 |
| <i>Usp46</i>         | chr5:73998462-74068430    | 1.3773   | 1.3666   | -0.0113 | 0.940251 |
| <i>Gm15982</i>       | chr5:74356565-74358415    | 2.4672   | 2.4096   | -0.0341 | 0.905663 |
| <i>G3bp2</i>         | chr5:92052145-92083735    | 65.2161  | 64.5858  | -0.0140 | 0.784384 |
| <i>Gm22728</i>       | chr5:92056063-92056192    | 7.9567   | 7.6743   | -0.0521 | 0.880146 |
| <i>5430416N02Rik</i> | chr5:100420841-100429516  | 10.7279  | 10.5507  | -0.0240 | 0.624980 |
| <i>Mrps18c</i>       | chr5:100798626-100804471  | 16.0282  | 15.7446  | -0.0258 | 0.886420 |
| <i>Gm26692</i>       | chr5:107659096-107688015  | 3.4218   | 3.3325   | -0.0381 | 0.912853 |
| <i>Evi5</i>          | chr5:107744794-107875107  | 0.3346   | 0.3326   | -0.0085 | 0.941370 |
| <i>Fam69a</i>        | chr5:107908052-107987085  | 25.1763  | 24.8210  | -0.0205 | 0.770573 |



|                      |                          |           |           |         |          |
|----------------------|--------------------------|-----------|-----------|---------|----------|
| <i>Crif2</i>         | chr5:109554710-109558993 | 15.2982   | 15.0485   | -0.0237 | 0.873040 |
| <i>Noc4l</i>         | chr5:110648417-110653417 | 11.2396   | 11.1454   | -0.0121 | 0.910488 |
| <i>Wscd1</i>         | chr5:113490332-113589725 | 0.9005    | 0.8818    | -0.0301 | 0.888341 |
| <i>Trpv4</i>         | chr5:114622151-114658421 | 0.2281    | 0.2279    | -0.0012 | 0.997271 |
| <i>Ankrd13a</i>      | chr5:114774676-114806200 | 64.3434   | 63.7033   | -0.0144 | 0.858201 |
| <i>NA</i>            | chr5:114812792-114813945 | 7.0312    | 6.9880    | -0.0089 | 0.961254 |
| <i>Unc119b</i>       | chr5:115122549-115134975 | 12.4560   | 12.3168   | -0.0162 | 0.899057 |
| <i>Ddx54</i>         | chr5:120613129-120628590 | 39.3337   | 38.7536   | -0.0214 | 0.800498 |
| <i>Gm26205</i>       | chr5:121205009-121205143 | 19.1061   | 18.8540   | -0.0192 | 0.918577 |
| <i>Rnf34</i>         | chr5:122850187-122868945 | 35.2185   | 34.6746   | -0.0225 | 0.691721 |
| <i>Wdr66</i>         | chr5:123252101-123327484 | 0.2864    | 0.2791    | -0.0373 | 0.868482 |
| <i>Mlxip</i>         | chr5:123394797-123457932 | 8.9435    | 8.8638    | -0.0129 | 0.949222 |
| <i>Gm16001</i>       | chr5:124111108-124112241 | 5.1005    | 5.0855    | -0.0042 | 0.985515 |
| <i>Scarb1</i>        | chr5:125277086-125341094 | 2.1433    | 2.1115    | -0.0215 | 0.895977 |
| <i>Gtf2i</i>         | chr5:134237833-134314760 | 48.0785   | 47.4713   | -0.0183 | 0.638015 |
| <i>Eij4h</i>         | chr5:134619879-134639348 | 105.6326  | 104.0690  | -0.0215 | 0.460124 |
| <i>Cldn4</i>         | chr5:134945125-134946934 | 1.0210    | 1.0651    | 0.0610  | 0.946707 |
| <i>Polr2j</i>        | chr5:136116630-136122947 | 45.3229   | 44.5267   | -0.0256 | 0.906772 |
| <i>Taf6</i>          | chr5:138178616-138187451 | 15.5089   | 15.3321   | -0.0165 | 0.871079 |
| <i>Gm10874</i>       | chr5:138363718-138388287 | 0.4182    | 0.4032    | -0.0524 | 0.880085 |
| <i>Gm24082</i>       | chr5:138606698-138606781 | 38.7114   | 38.2620   | -0.0168 | 0.944612 |
| <i>Gm15672</i>       | chr5:139147575-139150693 | 4.6771    | 4.6095    | -0.0210 | 0.930762 |
| <i>NA</i>            | chr5:139378219-139379259 | 1.0398    | 1.0453    | 0.0076  | 0.984580 |
| <i>Eij3b</i>         | chr5:140419304-140443358 | 44.5403   | 44.1206   | -0.0137 | 0.905088 |
| <i>Foxk1</i>         | chr5:142401496-142462014 | 16.7117   | 16.5458   | -0.0144 | 0.935945 |
| <i>Actb</i>          | chr5:142903114-142906754 | 2847.2556 | 2798.3546 | -0.0250 | 0.758538 |
| <i>E130309D02Rik</i> | chr5:143301194-143315360 | 6.2699    | 6.1500    | -0.0279 | 0.854845 |
| <i>Eij2ak1</i>       | chr5:143817787-143904256 | 12.0542   | 11.8894   | -0.0199 | 0.758602 |
| <i>Smurf1</i>        | chr5:144876494-144965847 | 11.8961   | 11.8095   | -0.0105 | 0.937495 |
| <i>Gm25091</i>       | chr5:146834833-146834904 | 14.5751   | 14.3853   | -0.0189 | 0.934139 |
| <i>Mtif3</i>         | chr5:146951572-146963800 | 18.1328   | 17.8427   | -0.0233 | 0.597664 |
| <i>Pan3</i>          | chr5:147430160-147548502 | 38.0440   | 37.6657   | -0.0144 | 0.804646 |
| <i>Pomp</i>          | chr5:147860627-147875778 | 85.6716   | 84.0350   | -0.0278 | 0.865567 |
| <i>Ccdc132</i>       | chr6:3498392-3603531     | 8.5610    | 8.4299    | -0.0223 | 0.832457 |
| <i>Gm26809</i>       | chr6:18844219-18847360   | 1.0692    | 1.0420    | -0.0371 | 0.852795 |
| <i>Ahcyl2</i>        | chr6:29768010-29912310   | 6.3550    | 6.2881    | -0.0153 | 0.705781 |
| <i>Akr1b10</i>       | chr6:34384217-34396950   | 8.2511    | 8.1543    | -0.0170 | 0.832258 |
| <i>Trbv13-3</i>      | chr6:41130146-41130585   | 85.5514   | 84.6772   | -0.0148 | 0.952001 |
| <i>Trbv23</i>        | chr6:41216072-41216526   | 5.4515    | 5.4107    | -0.0109 | 0.956331 |
| <i>Trbc1</i>         | chr6:41538217-41539347   | 250.8706  | 247.6525  | -0.0186 | 0.826962 |
| <i>Trbj2-6</i>       | chr6:41543597-41543645   | 97.1372   | 94.9697   | -0.0326 | 0.882097 |
| <i>Zyx</i>           | chr6:42349827-42360146   | 30.9411   | 30.4208   | -0.0245 | 0.916948 |
| <i>Tpk1</i>          | chr6:43345000-43666278   | 1.8670    | 1.8648    | -0.0017 | 0.993098 |
| <i>Zfp398</i>        | chr6:47835660-47868257   | 8.0946    | 7.9708    | -0.0222 | 0.791905 |
| <i>Tmem150a</i>      | chr6:72355446-72359762   | 3.8011    | 3.7363    | -0.0248 | 0.911256 |
| <i>Suclg1</i>        | chr6:73248381-73276911   | 12.8385   | 12.7158   | -0.0139 | 0.906939 |
| <i>Smyd5</i>         | chr6:85431988-85446435   | 10.6754   | 10.4854   | -0.0259 | 0.825672 |
| <i>Tprkb</i>         | chr6:85915737-85930284   | 11.8996   | 11.6930   | -0.0253 | 0.811906 |
| <i>Fam136a</i>       | chr6:86365682-86370057   | 13.4518   | 13.3074   | -0.0156 | 0.933880 |
| <i>Gm15519</i>       | chr6:112563641-112565207 | 0.8235    | 0.8208    | -0.0047 | 0.990435 |
| <i>Setd5</i>         | chr6:113077364-113153435 | 16.4933   | 16.3332   | -0.0141 | 0.922711 |
| <i>D6Wsu163e</i>     | chr6:126939965-126975704 | 10.9813   | 10.7948   | -0.0247 | 0.682288 |
| <i>Parp11</i>        | chr6:127446839-127494241 | 14.9009   | 14.7153   | -0.0181 | 0.845131 |
| <i>Klra7</i>         | chr6:130218604-130233322 | 2.8051    | 2.7861    | -0.0098 | 0.981124 |
| <i>Lrp6</i>          | chr6:134446475-134566965 | 14.4047   | 14.2410   | -0.0165 | 0.857931 |
| <i>3010003L21Rik</i> | chr6:148944866-148947129 | 3.1683    | 3.1140    | -0.0249 | 0.840590 |
| <i>Leng1</i>         | chr7:3660097-3665840     | 13.1615   | 13.0601   | -0.0112 | 0.941275 |
| <i>Mboat7</i>        | chr7:3677789-3693523     | 6.1634    | 6.1080    | -0.0130 | 0.915680 |
| <i>Zfp580</i>        | chr7:5051531-5053722     | 1.4199    | 1.4163    | -0.0036 | 0.990152 |
| <i>Zfp28</i>         | chr7:6383317-6396633     | 1.6831    | 1.6493    | -0.0292 | 0.780548 |
| <i>Cicn4-2</i>       | chr7:7282315-7299511     | 28.8345   | 28.5126   | -0.0162 | 0.848418 |
| <i>Zfp551</i>        | chr7:12415152-12422751   | 3.2692    | 3.2402    | -0.0129 | 0.854532 |
| <i>Mzf1</i>          | chr7:13042302-13054764   | 0.4705    | 0.4625    | -0.0249 | 0.835593 |
| <i>Zc3h4</i>         | chr7:16401195-16437694   | 18.5657   | 18.3706   | -0.0152 | 0.918481 |
| <i>Gm10676</i>       | chr7:18989553-18992774   | 3.3341    | 3.2669    | -0.0293 | 0.904051 |
| <i>Opa3</i>          | chr7:19228333-19256543   | 7.6114    | 7.5235    | -0.0168 | 0.879812 |
| <i>Zfp180</i>        | chr7:24081923-24107698   | 17.3021   | 17.1340   | -0.0141 | 0.860665 |
| <i>Zfp108</i>        | chr7:24257643-24261914   | 0.4749    | 0.4748    | -0.0002 | 0.999769 |
| <i>Zfp574</i>        | chr7:25077204-25083492   | 6.8682    | 6.8136    | -0.0115 | 0.917669 |
| <i>Exosc5</i>        | chr7:25659152-25668031   | 31.6501   | 31.2081   | -0.0203 | 0.786483 |
| <i>Adck4</i>         | chr7:27233022-27262252   | 4.9473    | 4.8896    | -0.0169 | 0.909683 |

|                      |                          |         |         |         |          |
|----------------------|--------------------------|---------|---------|---------|----------|
| <i>C030039L03Rik</i> | chr7:27689339-27706484   | 0.7885  | 0.7846  | -0.0072 | 0.978082 |
| <i>Nfkbb1</i>        | chr7:28758250-28767512   | 8.7226  | 8.5596  | -0.0272 | 0.863885 |
| <i>Rasgrp4</i>       | chr7:29134853-29153961   | 3.7039  | 3.6452  | -0.0230 | 0.845331 |
| <i>Gm10169</i>       | chr7:29965099-29965640   | 1.7039  | 1.6498  | -0.0466 | 0.899631 |
| <i>Alkbh6</i>        | chr7:30308716-30314304   | 6.1452  | 6.0782  | -0.0158 | 0.846375 |
| <i>Syne4</i>         | chr7:30314806-30319046   | 0.3302  | 0.3303  | 0.0003  | 0.998425 |
| <i>Kmt2b</i>         | chr7:30568857-30588726   | 8.5356  | 8.4005  | -0.0230 | 0.895279 |
| <i>Gpatch1</i>       | chr7:35276535-35318440   | 7.4795  | 7.4150  | -0.0125 | 0.928039 |
| <i>Cep89</i>         | chr7:35397034-35438689   | 1.5038  | 1.4738  | -0.0290 | 0.898914 |
| <i>Zfp715</i>        | chr7:43296196-43313294   | 14.2419 | 14.0872 | -0.0158 | 0.855072 |
| <i>Nup62</i>         | chr7:44816087-44803809   | 14.0751 | 13.9328 | -0.0147 | 0.869571 |
| <i>Irf3</i>          | chr7:44997647-45002848   | 50.3708 | 49.7897 | -0.0167 | 0.686171 |
| <i>Dhdh</i>          | chr7:45472955-45488805   | 0.4609  | 0.4513  | -0.0301 | 0.944641 |
| <i>E030018B13Rik</i> | chr7:63916856-63920539   | 6.1425  | 6.0906  | -0.0122 | 0.962829 |
| <i>Tarsl2</i>        | chr7:65644897-65692091   | 3.2388  | 3.1721  | -0.0300 | 0.760889 |
| <i>Vimp</i>          | chr7:66079648-66089412   | 28.4260 | 28.0777 | -0.0178 | 0.834899 |
| <i>Lrrc28</i>        | chr7:67513410-67645236   | 3.8336  | 3.7846  | -0.0186 | 0.906773 |
| <i>Abhd2</i>         | chr7:79273200-79365508   | 27.9114 | 27.5875 | -0.0168 | 0.857937 |
| <i>Furin</i>         | chr7:80388584-80405436   | 3.9723  | 3.9241  | -0.0176 | 0.934721 |
| <i>Tmem126a</i>      | chr7:90450699-90457229   | 32.4437 | 31.8934 | -0.0247 | 0.769660 |
| <i>Ccdc90b</i>       | chr7:92561148-92582294   | 5.4095  | 5.3668  | -0.0114 | 0.969728 |
| <i>Fchs2</i>         | chr7:101108774-101284405 | 11.6046 | 11.4920 | -0.0141 | 0.913450 |
| <i>Trim5</i>         | chr7:104263385-104288094 | 17.6750 | 17.3477 | -0.0270 | 0.900049 |
| <i>Ilk</i>           | chr7:105736591-105742925 | 42.1987 | 41.5106 | -0.0237 | 0.618188 |
| <i>493340618Rik</i>  | chr7:114315478-114415161 | 3.0505  | 2.9860  | -0.0308 | 0.817121 |
| <i>Ccp110</i>        | chr7:118712551-118737024 | 2.9918  | 2.9546  | -0.0180 | 0.892709 |
| <i>Gprc5b</i>        | chr7:118972039-118995211 | 1.1215  | 1.1176  | -0.0051 | 0.985635 |
| <i>9030407P20Rik</i> | chr7:120673438-120677560 | 1.8547  | 1.8401  | -0.0114 | 0.912486 |
| <i>Cog7</i>          | chr7:121922838-121981711 | 4.7767  | 4.7180  | -0.0178 | 0.886114 |
| <i>Nfatc2ip</i>      | chr7:126382853-126396737 | 4.2761  | 4.2274  | -0.0165 | 0.940440 |
| <i>Slx1b</i>         | chr7:126689467-126695784 | 6.1767  | 6.1050  | -0.0169 | 0.797303 |
| <i>Cdipt</i>         | chr7:126976348-126980499 | 75.2135 | 74.2616 | -0.0184 | 0.855449 |
| <i>Zfp688</i>        | chr7:127418966-127422068 | 8.2961  | 8.1453  | -0.0265 | 0.855444 |
| <i>Mcm2bp</i>        | chr7:128696440-128740495 | 38.6344 | 38.0198 | -0.0231 | 0.760060 |
| <i>Pstk</i>          | chr7:131371140-131387839 | 12.1831 | 12.0380 | -0.0173 | 0.801742 |
| <i>Acadsb</i>        | chr7:131410600-131446211 | 6.1346  | 6.0644  | -0.0166 | 0.914465 |
| <i>Ptpre</i>         | chr7:135537823-135686294 | 8.6504  | 8.5703  | -0.0134 | 0.882254 |
| <i>Brsk2</i>         | chr7:141949750-142004247 | 0.6098  | 0.6040  | -0.0139 | 0.973043 |
| <i>Gm23297</i>       | chr7:143531393-143531520 | 12.0081 | 12.0132 | 0.0006  | 0.998710 |
| <i>Nadsyn1</i>       | chr7:143795583-143822849 | 4.6110  | 4.5650  | -0.0144 | 0.896209 |
| <i>Ppfa1</i>         | chr7:144476757-144553729 | 12.3513 | 12.1588 | -0.0227 | 0.615562 |
| <i>Zfp358</i>        | chr8:3493137-3497208     | 6.3737  | 6.3112  | -0.0142 | 0.930781 |
| <i>BC068157</i>      | chr8:4209542-4217459     | 0.1872  | 0.1805  | -0.0525 | 0.913855 |
| <i>Gm15350</i>       | chr8:12828334-12833865   | 3.4139  | 3.3276  | -0.0369 | 0.894920 |
| <i>Proz</i>          | chr8:13060907-13075006   | 2.0753  | 2.0572  | -0.0127 | 0.949081 |
| <i>Ppapdc1b</i>      | chr8:25720060-25724887   | 5.6908  | 5.6081  | -0.0211 | 0.895220 |
| <i>Ppp2cb</i>        | chr8:33599620-33619794   | 31.9634 | 31.5682 | -0.0179 | 0.527442 |
| <i>Gm9939</i>        | chr8:34965051-34966209   | 5.7940  | 5.7420  | -0.0130 | 0.965493 |
| <i>Cnot7</i>         | chr8:40492539-40515847   | 16.5265 | 16.2958 | -0.0203 | 0.797546 |
| <i>Cep44</i>         | chr8:56531521-56551047   | 7.6650  | 7.6048  | -0.0114 | 0.926060 |
| <i>Il12rb1</i>       | chr8:70808448-70821424   | 6.2957  | 6.2216  | -0.0171 | 0.931645 |
| <i>Pgls</i>          | chr8:71592175-71601092   | 12.6569 | 12.4246 | -0.0267 | 0.870881 |
| <i>Ap1m1</i>         | chr8:72240017-72257385   | 26.4932 | 26.0701 | -0.0232 | 0.869501 |
| <i>Med26</i>         | chr8:72494557-72548310   | 6.7106  | 6.6116  | -0.0215 | 0.822949 |
| <i>Nr3c2</i>         | chr8:76899441-77245012   | 0.1497  | 0.1516  | 0.0179  | 0.974168 |
| <i>Otud4</i>         | chr8:79639617-79677724   | 51.3751 | 50.5060 | -0.0246 | 0.726433 |
| <i>1700067K01Rik</i> | chr8:84001501-84004770   | 0.7402  | 0.7422  | 0.0039  | 0.987286 |
| <i>Gm10643</i>       | chr8:84063560-84065137   | 6.0887  | 5.9983  | -0.0216 | 0.878422 |
| <i>Vps35</i>         | chr8:85260396-85299513   | 44.4650 | 43.8350 | -0.0206 | 0.810738 |
| <i>Snx20</i>         | chr8:88626827-88636128   | 23.0250 | 22.7343 | -0.0183 | 0.882532 |
| <i>Cyld</i>          | chr8:88697027-88751945   | 43.2571 | 42.5638 | -0.0233 | 0.684901 |
| <i>Chd9</i>          | chr8:90828834-91054508   | 10.7642 | 10.6417 | -0.0165 | 0.687197 |
| <i>Rspry1</i>        | chr8:94601954-94660275   | 14.6317 | 14.4605 | -0.0170 | 0.740997 |
| <i>Coq9</i>          | chr8:94838320-94854895   | 12.0307 | 11.8376 | -0.0233 | 0.772004 |
| <i>Polr2c</i>        | chr8:94857449-94864242   | 9.0427  | 8.9491  | -0.0150 | 0.925578 |
| <i>NA</i>            | chr8:95323013-95325263   | 4.0494  | 3.9642  | -0.0307 | 0.893994 |
| <i>Mmp15</i>         | chr8:95352267-95374293   | 0.6490  | 0.6348  | -0.0319 | 0.933680 |
| <i>Nutf2</i>         | chr8:105860633-105880402 | 1.5428  | 1.5178  | -0.0236 | 0.814540 |
| <i>Slc12a4</i>       | chr8:105943589-105966115 | 4.9964  | 4.9335  | -0.0183 | 0.885576 |
| <i>Gm16209</i>       | chr8:107037479-107038106 | 1.6855  | 1.6347  | -0.0441 | 0.878478 |
| <i>Gm26816</i>       | chr8:110863228-110940314 | 5.4222  | 5.3300  | -0.0248 | 0.811409 |

|                      |                          |          |          |         |          |
|----------------------|--------------------------|----------|----------|---------|----------|
| <i>Ldhd</i>          | chr8:111623784-111630374 | 2.1940   | 2.1652   | -0.0190 | 0.917521 |
| <i>Adat1</i>         | chr8:111966907-111992302 | 3.1576   | 3.1104   | -0.0218 | 0.875296 |
| <i>Gm20204</i>       | chr8:117210777-117215997 | 2.0765   | 2.0705   | -0.0042 | 0.982422 |
| <i>Banp</i>          | chr8:121949749-122029258 | 7.4946   | 7.4398   | -0.0106 | 0.948892 |
| <i>Cdk10</i>         | chr8:123224840-123232250 | 12.5675  | 12.3035  | -0.0306 | 0.822928 |
| <i>Rab4a</i>         | chr8:123805984-123835287 | 6.7895   | 6.7277   | -0.0132 | 0.934709 |
| <i>Z810455O05Rik</i> | chr8:123838552-123840785 | 3.4043   | 3.3883   | -0.0068 | 0.975837 |
| <i>Taf5l</i>         | chr8:123996317-124021309 | 23.9394  | 23.5446  | -0.0240 | 0.650628 |
| <i>Rbm34</i>         | chr8:126947174-126971079 | 13.4050  | 13.1738  | -0.0251 | 0.847707 |
| <i>A230050P20Rik</i> | chr9:20868641-20874307   | 19.7202  | 19.3737  | -0.0256 | 0.825813 |
| <i>Icam4</i>         | chr9:21029372-21030531   | 0.8185   | 0.8094   | -0.0161 | 0.969259 |
| <i>Keap1</i>         | chr9:21229729-21239332   | 19.5600  | 19.2307  | -0.0245 | 0.660660 |
| <i>Gm16853</i>       | chr9:21405241-21411720   | 1.6190   | 1.6134   | -0.0050 | 0.988595 |
| <i>Ncapd3</i>        | chr9:27030174-27095311   | 36.9645  | 36.4861  | -0.0188 | 0.824227 |
| <i>Jam3</i>          | chr9:27097384-27155421   | 0.7654   | 0.7603   | -0.0096 | 0.973371 |
| <i>Gm26787</i>       | chr9:36767886-36782670   | 4.6406   | 4.5585   | -0.0257 | 0.911509 |
| <i>Acat1</i>         | chr9:53580521-53610382   | 24.5030  | 24.2736  | -0.0136 | 0.881496 |
| <i>Wdr61</i>         | chr9:54714734-54734519   | 11.9734  | 11.8765  | -0.0117 | 0.912122 |
| <i>Snupn</i>         | chr9:56950877-56983206   | 8.6680   | 8.4994   | -0.0283 | 0.832829 |
| <i>Neil1</i>         | chr9:57143255-57147034   | 12.6864  | 12.4427  | -0.0280 | 0.867683 |
| <i>Gm17231</i>       | chr9:57777864-57834295   | 3.5610   | 3.5118   | -0.0201 | 0.929561 |
| <i>Anp32a</i>        | chr9:62341292-62378812   | 59.5487  | 58.5763  | -0.0238 | 0.889699 |
| <i>Gm10653</i>       | chr9:62841476-62868000   | 1.2695   | 1.2638   | -0.0065 | 0.980658 |
| <i>Ice2</i>          | chr9:69397905-69433122   | 9.8599   | 9.7536   | -0.0156 | 0.869631 |
| <i>Rnf111</i>        | chr9:70425428-70503725   | 21.6035  | 21.2638  | -0.0229 | 0.741292 |
| <i>Tmem30a</i>       | chr9:79768942-79793507   | 34.8385  | 34.4400  | -0.0166 | 0.795097 |
| <i>Dopey1</i>        | chr9:86485406-86555806   | 27.5099  | 27.0588  | -0.0239 | 0.786596 |
| <i>NA</i>            | chr9:86546681-86546795   | 9.8622   | 9.6448   | -0.0322 | 0.902407 |
| <i>Plod2</i>         | chr9:92542222-92608428   | 1.4498   | 1.4246   | -0.0253 | 0.895062 |
| <i>Z930579K19Rik</i> | chr9:98562959-98563611   | 1.7525   | 1.7164   | -0.0300 | 0.906699 |
| <i>Nck1</i>          | chr9:100492292-100546053 | 15.5978  | 15.3589  | -0.0223 | 0.543535 |
| <i>Aste1</i>         | chr9:105395391-105405758 | 7.9320   | 7.8486   | -0.0153 | 0.822280 |
| <i>Rrp9</i>          | chr9:106475962-106485424 | 22.6058  | 22.2108  | -0.0254 | 0.774159 |
| <i>Cyb561d2</i>      | chr9:107539010-107541865 | 11.2090  | 11.0664  | -0.0185 | 0.879682 |
| <i>Nprl2</i>         | chr9:107542208-107545704 | 27.0894  | 26.6406  | -0.0241 | 0.772522 |
| <i>Mst1</i>          | chr9:108080435-108085027 | 5.8094   | 5.6988   | -0.0277 | 0.903266 |
| <i>Tdgf1</i>         | chr9:110939609-110946158 | 1.3695   | 1.3513   | -0.0193 | 0.935917 |
| <i>Z930520O04Rik</i> | chr9:114368302-114377229 | 0.6968   | 0.6845   | -0.0257 | 0.913683 |
| <i>Ebp</i>           | chrX:8185328-8193512     | 18.7042  | 18.5242  | -0.0138 | 0.861834 |
| <i>Usp11</i>         | chrX:20703905-20720539   | 16.3244  | 16.0742  | -0.0223 | 0.754397 |
| <i>Rnf113a1</i>      | chrX:37191244-37192462   | 6.1958   | 6.1514   | -0.0104 | 0.916140 |
| <i>Kis2</i>          | chrX:52742562-52744960   | 1.9306   | 1.9239   | -0.0050 | 0.977254 |
| <i>Cx1a</i>          | chrX:53642487-53643763   | 0.7585   | 0.7608   | 0.0044  | 0.993157 |
| <i>Arhgap4</i>       | chrX:73891441-73921870   | 70.2178  | 69.1195  | -0.0227 | 0.631441 |
| <i>Pdk3</i>          | chrX:93764606-93832201   | 12.5765  | 12.3824  | -0.0224 | 0.732746 |
| <i>Rpl36a</i>        | chrX:134585653-134588062 | 7.8149   | 7.6796   | -0.0252 | 0.803922 |
| <i>Armcx6</i>        | chrX:134748460-134751417 | 0.3313   | 0.3297   | -0.0069 | 0.983587 |
| <i>Gprasp1</i>       | chrX:135742732-135803474 | 7.5174   | 7.4287   | -0.0171 | 0.861744 |
| <i>Acsf4</i>         | chrX:142317992-142390535 | 18.9511  | 18.6286  | -0.0248 | 0.758421 |
| <i>Gm15066</i>       | chrX:144285725-144288333 | 0.9727   | 0.9645   | -0.0123 | 0.955689 |
| <i>Gm15163</i>       | chrX:157015330-157120545 | 0.5196   | 0.5026   | -0.0478 | 0.896838 |
| <i>A830080D01Rik</i> | chrX:159526687-159593081 | 7.9164   | 7.8536   | -0.0115 | 0.935350 |
| <i>Ctps2</i>         | chrX:162901237-163032508 | 29.1706  | 28.8753  | -0.0147 | 0.850166 |
| <i>Ccdc152</i>       | chr15:3280626-3303526    | 1.0344   | 1.0344   | 0.0000  | 0.999921 |
| <i>Oxct1</i>         | chr15:4026382-4155344    | 43.5495  | 42.8604  | -0.0230 | 0.800315 |
| <i>Hrsp12</i>        | chr15:34484020-34495255  | 4.5657   | 4.5386   | -0.0086 | 0.959151 |
| <i>Gm20712</i>       | chr15:58780460-58781951  | 0.4964   | 0.4877   | -0.0255 | 0.943857 |
| <i>Mtss1</i>         | chr15:58941243-59082026  | 8.6639   | 8.5364   | -0.0214 | 0.862803 |
| <i>Efr3a</i>         | chr15:65787033-65873816  | 36.4912  | 36.0911  | -0.0159 | 0.845586 |
| <i>Them6</i>         | chr15:74721233-74724373  | 11.8359  | 11.7387  | -0.0119 | 0.929334 |
| <i>Spatc1</i>        | chr15:76268088-76292572  | 0.6200   | 0.6062   | -0.0324 | 0.862477 |
| <i>Gm22107</i>       | chr15:77840656-77840756  | 30.2556  | 30.0615  | -0.0093 | 0.948982 |
| <i>Eif3d</i>         | chr15:77958997-77970824  | 106.9514 | 105.3821 | -0.0213 | 0.782669 |
| <i>Tomm22</i>        | chr15:79670860-79672862  | 75.4690  | 74.8644  | -0.0116 | 0.926386 |
| <i>Gm16576</i>       | chr15:79742697-79757394  | 1.5738   | 1.5377   | -0.0335 | 0.812549 |
| <i>Snord83b</i>      | chr15:80078497-80078591  | 22.9387  | 22.7304  | -0.0132 | 0.973586 |
| <i>Zc3h7b</i>        | chr15:81744847-81796269  | 6.8712   | 6.7694   | -0.0215 | 0.877289 |
| <i>Srebfp2</i>       | chr15:82147265-82205376  | 18.8107  | 18.5396  | -0.0209 | 0.829449 |
| <i>Nup50</i>         | chr15:84923427-84942955  | 25.5242  | 25.1891  | -0.0191 | 0.689468 |
| <i>Pus7l</i>         | chr15:94522687-94543547  | 9.3277   | 9.2429   | -0.0132 | 0.849145 |
| <i>Pced1b</i>        | chr15:97247106-97385689  | 34.2589  | 33.8598  | -0.0169 | 0.871798 |

|                      |                           |          |          |         |          |
|----------------------|---------------------------|----------|----------|---------|----------|
| <i>Spats2</i>        | chr15:99126577-99213206   | 0.8841   | 0.8643   | -0.0328 | 0.916679 |
| <i>Gm17058</i>       | chr15:99765990-99782332   | 0.9772   | 0.9424   | -0.0524 | 0.875733 |
| <i>Copz1</i>         | chr15:103272910-103299862 | 31.6531  | 31.1525  | -0.0230 | 0.792425 |
| <i>Abhd6</i>         | chr14:8002901-8056555     | 2.1614   | 2.1196   | -0.0281 | 0.903139 |
| <i>3830406C13Rik</i> | chr14:12284208-12303231   | 11.4298  | 11.2491  | -0.0230 | 0.803049 |
| <i>Gm26772</i>       | chr14:25548389-25554369   | 0.3273   | 0.3174   | -0.0445 | 0.895149 |
| <i>SImap</i>         | chr14:26413167-26534931   | 13.1786  | 12.9820  | -0.0217 | 0.813599 |
| <i>Actr8</i>         | chr14:29978336-29993221   | 28.7853  | 28.4299  | -0.0179 | 0.747769 |
| <i>Mir3076</i>       | chr14:30572148-30572208   | 25.7405  | 25.4051  | -0.0189 | 0.939538 |
| <i>Rft1</i>          | chr14:30654359-30691317   | 5.4021   | 5.3507   | -0.0138 | 0.928276 |
| <i>Timm23</i>        | chr14:32180161-32201898   | 6.8453   | 6.6863   | -0.0339 | 0.850775 |
| <i>Gm17210</i>       | chr14:32292923-32294974   | 3.4461   | 3.3658   | -0.0340 | 0.878963 |
| <i>Bmpr1a</i>        | chr14:34410733-34503341   | 0.1906   | 0.1882   | -0.0178 | 0.943807 |
| <i>Cdkn3</i>         | chr14:46760540-46771525   | 2.4727   | 2.4083   | -0.0381 | 0.853129 |
| <i>Gm10101</i>       | chr14:46829108-46832027   | 3.2668   | 3.2361   | -0.0137 | 0.931398 |
| <i>Sall2</i>         | chr14:52311171-52328762   | 2.6877   | 2.6404   | -0.0256 | 0.781933 |
| <i>Traj42</i>        | chr14:54175772-54175836   | 18.2671  | 18.0991  | -0.0133 | 0.963051 |
| <i>Traj12</i>        | chr14:54206552-54206610   | 137.2376 | 136.2242 | -0.0107 | 0.932251 |
| <i>Gm15932</i>       | chr14:55567218-55575991   | 14.3916  | 14.1667  | -0.0227 | 0.897038 |
| <i>Tinf2</i>         | chr14:55679082-55681817   | 27.5200  | 27.0533  | -0.0247 | 0.750606 |
| <i>Ska3</i>          | chr14:57806560-57826163   | 1.7112   | 1.6993   | -0.0100 | 0.982168 |
| <i>Cdadc1</i>        | chr14:59560895-59597836   | 7.8005   | 7.6800   | -0.0225 | 0.893179 |
| <i>Ctsb</i>          | chr14:63122461-63145919   | 23.6656  | 23.3063  | -0.0221 | 0.742534 |
| <i>Bin3</i>          | chr14:70100144-70138191   | 25.7332  | 25.4834  | -0.0141 | 0.905384 |
| <i>Fam160b2</i>      | chr14:70583295-70599835   | 5.2321   | 5.1696   | -0.0174 | 0.886843 |
| <i>Tpt1</i>          | chr14:75845092-75848525   | 25.2241  | 25.1221  | -0.0058 | 0.983655 |
| <i>Rnf219</i>        | chr14:104477533-104522666 | 9.2889   | 9.1424   | -0.0229 | 0.719936 |
| <i>Gm26773</i>       | chr14:118107830-118117100 | 3.0680   | 3.0395   | -0.0135 | 0.880025 |
| <i>Synj2</i>         | chr17:5941279-6044290     | 3.3827   | 3.3451   | -0.0161 | 0.831801 |
| <i>Gm5812</i>        | chr17:6121207-6122164     | 1.4879   | 1.4875   | -0.0004 | 0.999158 |
| <i>Rsph3b</i>        | chr17:6904715-6948356     | 0.7788   | 0.7607   | -0.0341 | 0.885976 |
| <i>Phf10</i>         | chr17:14945008-14961273   | 13.6154  | 13.4652  | -0.0160 | 0.846395 |
| <i>Zfp820</i>        | chr17:21816875-21845759   | 0.2195   | 0.2146   | -0.0329 | 0.921483 |
| <i>Zfp943</i>        | chr17:21962551-22071168   | 13.5167  | 13.3089  | -0.0224 | 0.834871 |
| <i>Ccnf</i>          | chr17:24223231-24251409   | 1.9013   | 1.8567   | -0.0342 | 0.917895 |
| <i>Nthl1</i>         | chr17:24632681-24638838   | 2.4321   | 2.3808   | -0.0308 | 0.902822 |
| <i>Arhgdig</i>       | chr17:26196225-26207786   | 0.8567   | 0.8572   | 0.0009  | 0.997606 |
| <i>Phf1</i>          | chr17:26933126-26937890   | 29.7667  | 29.4407  | -0.0159 | 0.864761 |
| <i>Abcg1</i>         | chr17:31057697-31115777   | 39.5580  | 39.0520  | -0.0186 | 0.853773 |
| <i>Gm26693</i>       | chr17:32810143-32821697   | 5.7092   | 5.6498   | -0.0151 | 0.922988 |
| <i>Zfp101</i>        | chr17:33360506-33394641   | 5.4108   | 5.3363   | -0.0200 | 0.857491 |
| <i>March2</i>        | chr17:33685691-33718670   | 12.2404  | 12.1125  | -0.0152 | 0.829625 |
| <i>Rab11b</i>        | chr17:33742483-33760530   | 9.8863   | 9.7543   | -0.0194 | 0.701306 |
| <i>Pfdn6</i>         | chr17:33938820-33940343   | 29.5408  | 29.1917  | -0.0172 | 0.917672 |
| <i>Psmb9</i>         | chr17:34181987-34187764   | 46.2178  | 45.7386  | -0.0150 | 0.827415 |
| <i>Gm20496</i>       | chr17:34199315-34205449   | 187.5178 | 184.0032 | -0.0273 | 0.805823 |
| <i>Stk19</i>         | chr17:34823992-34836945   | 3.1249   | 3.0834   | -0.0193 | 0.892334 |
| <i>Gm20547</i>       | chr17:34856411-34882042   | 0.4380   | 0.4354   | -0.0085 | 0.972923 |
| <i>Ly6g5b</i>        | chr17:35113947-35115428   | 1.6428   | 1.6496   | 0.0059  | 0.983289 |
| <i>Gm17705</i>       | chr17:35165118-35167186   | 1.1407   | 1.1277   | -0.0166 | 0.958044 |
| <i>Mdc1</i>          | chr17:35841514-35859670   | 10.6162  | 10.4915  | -0.0170 | 0.914083 |
| <i>Nrm</i>           | chr17:35861317-35865402   | 15.6149  | 15.3463  | -0.0250 | 0.748032 |
| <i>Mir877</i>        | chr17:35960729-35960814   | 8.7153   | 8.7790   | 0.0105  | 0.985134 |
| <i>Tmem63b</i>       | chr17:45660170-45686905   | 3.1959   | 3.1691   | -0.0121 | 0.896133 |
| <i>Ccdc94</i>        | chr17:55959186-55967949   | 12.1878  | 11.9656  | -0.0265 | 0.801473 |
| <i>Dennd1c</i>       | chr17:57066055-57078510   | 53.1367  | 52.2430  | -0.0245 | 0.821806 |
| <i>Emilin2</i>       | chr17:71252175-71310965   | 0.2378   | 0.2305   | -0.0447 | 0.952279 |
| <i>Memo1</i>         | chr17:74200705-74294883   | 18.1692  | 17.9706  | -0.0159 | 0.874596 |
| <i>Gm10093</i>       | chr17:78491564-78493541   | 0.7532   | 0.7491   | -0.0078 | 0.977576 |
| <i>Heatr5b</i>       | chr17:78752905-78835381   | 10.7211  | 10.5937  | -0.0173 | 0.835709 |
| <i>Gm6548</i>        | chr17:78850791-78851956   | 14.6021  | 14.4336  | -0.0167 | 0.898012 |
| <i>Atl2</i>          | chr17:79848391-79896123   | 10.0277  | 9.8513   | -0.0256 | 0.815546 |
| <i>Cdkl4</i>         | chr17:80523549-80563834   | 1.9372   | 1.9092   | -0.0210 | 0.948701 |
| <i>C430042M11Rik</i> | chr17:83851674-83854393   | 1.8772   | 1.8589   | -0.0141 | 0.947307 |
| <i>Gm20695</i>       | chr16:3884647-3919517     | 25.3900  | 25.0535  | -0.0193 | 0.752560 |
| <i>Litaf</i>         | chr16:10959274-11066157   | 5.0601   | 4.9816   | -0.0226 | 0.877112 |
| <i>Parn</i>          | chr16:13537963-13668170   | 20.8527  | 20.5821  | -0.0188 | 0.821805 |
| <i>Fopnl</i>         | chr16:14299243-14317375   | 27.7219  | 27.4955  | -0.0118 | 0.928694 |
| <i>Gm15648</i>       | chr16:17152629-17153704   | 20.8695  | 20.5021  | -0.0256 | 0.884451 |
| <i>Gm26635</i>       | chr16:17254959-17260326   | 1.2835   | 1.2509   | -0.0372 | 0.906641 |
| <i>Car15</i>         | chr16:17835275-17838364   | 5.2632   | 5.2310   | -0.0089 | 0.961208 |

|               |                          |          |          |         |          |
|---------------|--------------------------|----------|----------|---------|----------|
| Gm24572       | chr16:18284549-18284637  | 15.2056  | 15.2387  | 0.0031  | 0.992939 |
| Gnb1l         | chr16:18498767-18566679  | 1.9636   | 1.9326   | -0.0230 | 0.899028 |
| Klh6          | chr16:19946498-19983037  | 160.8088 | 158.2236 | -0.0234 | 0.467457 |
| Igf2bp2       | chr16:22059008-22163299  | 0.6448   | 0.6352   | -0.0217 | 0.921739 |
| Bcl6          | chr16:23965051-23988852  | 2.9399   | 2.9072   | -0.0161 | 0.909176 |
| Pigx          | chr16:32084419-32099738  | 22.0942  | 21.7881  | -0.0201 | 0.822724 |
| Fyttd1        | chr16:32877499-32908963  | 11.6896  | 11.5024  | -0.0233 | 0.812226 |
| Gm6611        | chr16:32923217-32924489  | 6.8823   | 6.7681   | -0.0241 | 0.884051 |
| Gm26838       | chr16:35805946-35808946  | 1.1261   | 1.1295   | 0.0043  | 0.994859 |
| Hcls1         | chr16:36934982-36963212  | 89.2551  | 88.3196  | -0.0152 | 0.872343 |
| Polq          | chr16:37011785-37095417  | 2.1386   | 2.1028   | -0.0243 | 0.874251 |
| Naa50         | chr16:44139829-44163366  | 12.9256  | 12.8050  | -0.0135 | 0.875951 |
| BC027231      | chr16:44724300-44737284  | 8.5284   | 8.3827   | -0.0249 | 0.742917 |
| Paxbp1        | chr16:91014036-91044543  | 33.1963  | 32.7236  | -0.0207 | 0.781067 |
| A930006K02Rik | chr16:91465103-91470121  | 8.5851   | 8.4325   | -0.0259 | 0.887998 |
| Ppp1ca        | chr19:4192157-4195419    | 324.5769 | 320.4222 | -0.0186 | 0.869926 |
| Rce1          | chr19:4622550-4625617    | 19.4319  | 19.1575  | -0.0205 | 0.863380 |
| Gm21992       | chr19:4742912-4811612    | 19.8055  | 19.5839  | -0.0162 | 0.702762 |
| Sart1         | chr19:5377522-5388703    | 32.1026  | 31.5439  | -0.0253 | 0.807655 |
| Tsga10ip      | chr19:5390048-5394401    | 3.6096   | 3.5385   | -0.0287 | 0.927514 |
| Zfp1          | chr19:6076486-6084944    | 11.5796  | 11.3906  | -0.0237 | 0.810068 |
| Gm14966       | chr19:6355521-6363759    | 8.8909   | 8.7947   | -0.0157 | 0.863460 |
| Prdx5         | chr19:6906696-6910106    | 23.5762  | 23.1820  | -0.0243 | 0.838777 |
| Stip1         | chr19:7020695-7040026    | 63.2528  | 62.3643  | -0.0204 | 0.864639 |
| Mark2         | chr19:7275395-7341860    | 16.3647  | 16.1265  | -0.0211 | 0.887841 |
| A1846148      | chr19:7356463-7383026    | 8.3225   | 8.1780   | -0.0253 | 0.709747 |
| Ptgr2         | chr19:10937159-10942511  | 0.6261   | 0.6167   | -0.0220 | 0.942983 |
| Gm6563        | chr19:23675843-23676712  | 3.5363   | 3.4607   | -0.0312 | 0.922171 |
| Fam122a       | chr19:24476501-24477356  | 5.8496   | 5.7859   | -0.0158 | 0.955282 |
| Gm24252       | chr19:25166084-25166216  | 7.1404   | 7.0659   | -0.0151 | 0.941505 |
| Rnls          | chr19:33137746-33392295  | 1.6603   | 1.6187   | -0.0366 | 0.907242 |
| A1606181      | chr19:41593362-41596158  | 4.0320   | 3.9880   | -0.0158 | 0.944066 |
| Pprc1         | chr19:46044885-46072915  | 7.9162   | 7.8022   | -0.0209 | 0.917280 |
| Nolc1         | chr19:46075862-46085528  | 32.3892  | 32.0294  | -0.0161 | 0.849763 |
| Acs15         | chr19:55253368-55296627  | 70.3630  | 69.5758  | -0.0162 | 0.842068 |
| Nanos1        | chr19:60755986-60759913  | 6.0354   | 5.9332   | -0.0246 | 0.841568 |
| Sfxn4         | chr19:60837276-60861479  | 2.1850   | 2.1570   | -0.0186 | 0.903029 |
| Plekhb2       | chr1:34849975-34879580   | 6.7285   | 6.6564   | -0.0155 | 0.887348 |
| Neurl3        | chr1:36264601-36273425   | 57.1483  | 56.5257  | -0.0158 | 0.861415 |
| Kansl3        | chr1:36335729-36369181   | 18.4652  | 18.1876  | -0.0219 | 0.771016 |
| Gm18828       | chr1:36764862-36765874   | 4.2251   | 4.1265   | -0.0341 | 0.893503 |
| Coa5          | chr1:37417083-37430103   | 28.1357  | 27.8006  | -0.0173 | 0.791941 |
| Txndc9        | chr1:37983866-37997346   | 16.2244  | 16.0337  | -0.0171 | 0.789618 |
| Nabp1         | chr1:51469497-51478399   | 44.6575  | 43.9624  | -0.0226 | 0.837807 |
| Tmem194b      | chr1:52630704-52651919   | 20.1515  | 19.8542  | -0.0214 | 0.871382 |
| Nif3l1        | chr1:58445150-58481816   | 8.8606   | 8.7417   | -0.0195 | 0.792525 |
| Carf          | chr1:60098246-60151032   | 3.3083   | 3.2743   | -0.0149 | 0.870761 |
| Gm26457       | chr1:63178676-63178754   | 28.6074  | 28.2382  | -0.0187 | 0.945531 |
| Slc23a3       | chr1:75125543-75133890   | 0.5041   | 0.5114   | 0.0209  | 0.956244 |
| Mrpl44        | chr1:79776017-79781445   | 19.5146  | 19.1603  | -0.0264 | 0.726349 |
| A530040E14Rik | chr1:85105945-85114035   | 1.8186   | 1.7900   | -0.0229 | 0.954041 |
| Armc9         | chr1:86154779-86278284   | 1.4455   | 1.4198   | -0.0259 | 0.869603 |
| Sned1         | chr1:93235840-93301065   | 0.8444   | 0.8331   | -0.0193 | 0.866912 |
| Sept2         | chr1:93478963-93510260   | 35.0230  | 34.4796  | -0.0226 | 0.634199 |
| Vps4b         | chr1:106764070-106796728 | 24.0353  | 23.7463  | -0.0175 | 0.639140 |
| Clasp1        | chr1:118389057-118609432 | 10.3487  | 10.1731  | -0.0247 | 0.738478 |
| PlekhA6       | chr1:133246096-133303435 | 1.1558   | 1.1494   | -0.0081 | 0.974463 |
| Lad1          | chr1:135818597-135833341 | 1.8653   | 1.8488   | -0.0129 | 0.953866 |
| Glrx2         | chr1:143739028-143749676 | 5.5102   | 5.4113   | -0.0261 | 0.666530 |
| Uchl5         | chr1:143777277-143807466 | 15.6639  | 15.5051  | -0.0147 | 0.790270 |
| Zbtb37        | chr1:161008793-161034849 | 10.1265  | 10.0092  | -0.0168 | 0.782279 |
| Tnfrsf4       | chr1:161395408-161418410 | 0.6239   | 0.6231   | -0.0017 | 0.998158 |
| Slc19a2       | chr1:164249045-164265385 | 1.9697   | 1.9527   | -0.0125 | 0.929724 |
| Pea15a        | chr1:172196727-172206804 | 17.2821  | 17.1387  | -0.0120 | 0.897142 |
| Opn3          | chr1:175662420-175692776 | 0.5247   | 0.5261   | 0.0036  | 0.989229 |
| BO20018G12Rik | chr1:175977776-175979114 | 0.8104   | 0.8051   | -0.0093 | 0.978154 |
| Gm16585       | chr1:177786855-17787465  | 2.9038   | 2.8679   | -0.0179 | 0.967707 |
| Tfb2m         | chr1:179528054-179546267 | 3.9899   | 3.9446   | -0.0165 | 0.851550 |
| Adck3         | chr1:180165237-180199602 | 3.1720   | 3.1127   | -0.0272 | 0.884333 |
| A430105J06Rik | chr1:186749395-186752921 | 0.7317   | 0.7294   | -0.0045 | 0.986711 |
| Slc30a1       | chr1:191906766-191913247 | 8.2667   | 8.1842   | -0.0145 | 0.876476 |

|                      |                          |          |          |         |          |
|----------------------|--------------------------|----------|----------|---------|----------|
| <i>Svil</i>          | chr18:4920539-5119299    | 10.7594  | 10.6455  | -0.0154 | 0.844513 |
| <i>Mib1</i>          | chr18:10725547-10818704  | 11.7562  | 11.5619  | -0.0241 | 0.743703 |
| <i>Gm24959</i>       | chr18:20844446-20844592  | 8.8322   | 8.8886   | 0.0092  | 0.974372 |
| <i>Wdr36</i>         | chr18:32837224-32866420  | 34.3532  | 33.8406  | -0.0217 | 0.789080 |
| <i>Reep5</i>         | chr18:34344888-34373415  | 12.0522  | 11.9242  | -0.0154 | 0.828369 |
| <i>Pkd2l2</i>        | chr18:34409422-34442789  | 9.8125   | 9.6574   | -0.0230 | 0.829479 |
| <i>Pfdn1</i>         | chr18:36403678-36454495  | 25.8326  | 25.3295  | -0.0284 | 0.887556 |
| <i>Diap1</i>         | chr18:37843600-37935476  | 20.9369  | 20.6219  | -0.0219 | 0.841231 |
| <i>Lars</i>          | chr18:42202349-42262122  | 35.5691  | 35.0455  | -0.0214 | 0.799761 |
| <i>Tcof1</i>         | chr18:60813754-60848971  | 25.5394  | 25.1389  | -0.0228 | 0.857113 |
| <i>Csf1r</i>         | chr18:61105571-61132149  | 2.5815   | 2.5371   | -0.0250 | 0.730779 |
| <i>Adrb2</i>         | chr18:62177816-62179959  | 16.2981  | 16.0225  | -0.0246 | 0.752392 |
| <i>Cep192</i>        | chr18:67800106-67885168  | 26.1469  | 25.7306  | -0.0232 | 0.833422 |
| <i>4930503L19Rik</i> | chr18:70453139-70472480  | 12.4235  | 12.2934  | -0.0152 | 0.811215 |
| <i>Haus1</i>         | chr18:77757566-77767780  | 23.0639  | 22.7830  | -0.0177 | 0.863432 |
| <i>Pard6g</i>        | chr18:80046894-80119640  | 2.1294   | 2.1065   | -0.0156 | 0.890550 |
| <i>Zadh2</i>         | chr18:84088157-84097514  | 6.9064   | 6.7798   | -0.0267 | 0.817452 |
| <i>Nmt2</i>          | chr2:3284211-3328877     | 12.4424  | 12.2584  | -0.0215 | 0.756693 |
| <i>Rpp38</i>         | chr2:3328948-3332643     | 12.5765  | 12.3479  | -0.0265 | 0.886075 |
| <i>Prkcq</i>         | chr2:11172112-11301226   | 98.3067  | 97.1829  | -0.0166 | 0.575000 |
| <i>Gm13369</i>       | chr2:24993356-24994343   | 0.8456   | 0.8325   | -0.0225 | 0.965415 |
| <i>Gm22572</i>       | chr2:25208622-25208727   | 10.8822  | 10.8224  | -0.0080 | 0.967612 |
| <i>Tprn</i>          | chr2:25262617-25269885   | 5.2004   | 5.1042   | -0.0269 | 0.851893 |
| <i>Anapc2</i>        | chr2:25272477-25285915   | 12.1384  | 12.0295  | -0.0130 | 0.902215 |
| <i>Gm13554</i>       | chr2:26059009-26060275   | 6.6744   | 6.6335   | -0.0089 | 0.983291 |
| <i>Agpat2</i>        | chr2:26593056-26604417   | 6.7723   | 6.6569   | -0.0248 | 0.700646 |
| <i>Lcn4</i>          | chr2:26667673-26671282   | 108.9058 | 107.2660 | -0.0219 | 0.873662 |
| <i>Surf2</i>         | chr2:26916366-26920183   | 24.3542  | 24.0482  | -0.0182 | 0.590888 |
| <i>Stkld1</i>        | chr2:26934046-26953496   | 2.1593   | 2.1509   | -0.0057 | 0.986551 |
| <i>Tbc1d13</i>       | chr2:30133745-30152013   | 13.7862  | 13.6298  | -0.0165 | 0.864488 |
| <i>St6galnac4</i>    | chr2:32587094-32599698   | 10.0869  | 9.9040   | -0.0264 | 0.851054 |
| <i>Cdk9</i>          | chr2:32705783-32713076   | 7.8819   | 7.7896   | -0.0170 | 0.733771 |
| <i>Zbtb6</i>         | chr2:37425499-37443171   | 17.0687  | 16.7849  | -0.0242 | 0.852644 |
| <i>Zbtb21</i>        | chr2:37432167-37443121   | 10.1184  | 9.9382   | -0.0259 | 0.758721 |
| <i>Dennd1a</i>       | chr2:37798990-38287390   | 5.2058   | 5.1552   | -0.0141 | 0.928187 |
| <i>Gm13556</i>       | chr2:38286254-38287291   | 2.0120   | 2.0137   | 0.0012  | 0.994866 |
| <i>Rpl35</i>         | chr2:39001579-39005624   | 31.7216  | 31.0578  | -0.0305 | 0.888026 |
| <i>Gm13456</i>       | chr2:40555751-40557116   | 61.3196  | 60.7738  | -0.0129 | 0.943697 |
| <i>Stam2</i>         | chr2:52691663-52742281   | 6.0887   | 6.0303   | -0.0139 | 0.618657 |
| <i>Fmnl2</i>         | chr2:52857859-53134202   | 0.8920   | 0.8820   | -0.0163 | 0.943671 |
| <i>Hat1</i>          | chr2:71388957-71441622   | 14.2665  | 14.0758  | -0.0194 | 0.849607 |
| <i>Rapgef4os2</i>    | chr2:72224687-72232302   | 7.3013   | 7.1980   | -0.0206 | 0.850244 |
| <i>Atf2</i>          | chr2:73816508-73892639   | 9.5823   | 9.4493   | -0.0202 | 0.826522 |
| <i>Itgav</i>         | chr2:83724396-83806916   | 5.6540   | 5.5917   | -0.0160 | 0.915205 |
| <i>Arfgap2</i>       | chr2:91264973-91276931   | 14.1737  | 13.9386  | -0.0241 | 0.774987 |
| <i>Gm13771</i>       | chr2:91641684-91641922   | 3.5180   | 3.5384   | 0.0083  | 0.902438 |
| <i>2810002D19Rik</i> | chr2:94406150-94411682   | 6.9267   | 6.8257   | -0.0212 | 0.853713 |
| <i>Cstf3</i>         | chr2:104590522-104665429 | 7.6286   | 7.5559   | -0.0138 | 0.841789 |
| <i>Arhgap11a</i>     | chr2:113831491-113848661 | 2.9245   | 2.9020   | -0.0111 | 0.948495 |
| <i>Bub1b</i>         | chr2:118598210-118641591 | 4.0966   | 4.0605   | -0.0128 | 0.970807 |
| <i>Gm14137</i>       | chr2:119174508-119177575 | 0.8184   | 0.8031   | -0.0272 | 0.915542 |
| <i>Ubr1</i>          | chr2:120860268-120970715 | 19.6149  | 19.3242  | -0.0215 | 0.765106 |
| <i>Spg11</i>         | chr2:122053519-122118386 | 13.1250  | 12.9300  | -0.0216 | 0.703598 |
| <i>Gm14029</i>       | chr2:129182481-129183947 | 24.3153  | 24.0844  | -0.0138 | 0.911445 |
| <i>Stk35</i>         | chr2:129800516-129832287 | 2.8292   | 2.7982   | -0.0159 | 0.915015 |
| <i>Gm23187</i>       | chr2:130277194-130277280 | 33.8917  | 33.5475  | -0.0147 | 0.955000 |
| <i>Slc4a11</i>       | chr2:130684112-130697519 | 0.2987   | 0.2976   | -0.0052 | 0.985808 |
| <i>1700026D11Rik</i> | chr2:132490633-132524057 | 1.5688   | 1.5507   | -0.0168 | 0.937620 |
| <i>Rrbp1</i>         | chr2:143947394-144011263 | 9.4281   | 9.2704   | -0.0243 | 0.855330 |
| <i>Rbbp9</i>         | chr2:144542264-144550869 | 3.1660   | 3.1411   | -0.0114 | 0.941215 |
| <i>Gzf1</i>          | chr2:148681022-148692949 | 6.9037   | 6.8045   | -0.0209 | 0.824181 |
| <i>Entpd6</i>        | chr2:150749041-150771675 | 14.9035  | 14.7416  | -0.0158 | 0.749185 |
| <i>Nol4l</i>         | chr2:153407461-153529971 | 0.3951   | 0.3869   | -0.0304 | 0.899310 |
| <i>Dnmt3b</i>        | chr2:153649449-153687730 | 2.9904   | 2.9659   | -0.0119 | 0.950635 |
| <i>Itch</i>          | chr2:155133508-155226855 | 20.6851  | 20.4555  | -0.0161 | 0.826714 |
| <i>Map1lc3a</i>      | chr2:155276296-155278073 | 1.8394   | 1.8317   | -0.0060 | 0.986121 |
| <i>Dlgap4</i>        | chr2:156613704-156764363 | 7.0172   | 6.9157   | -0.0210 | 0.828715 |
| <i>Tti1</i>          | chr2:157981802-158028433 | 14.4810  | 14.2539  | -0.0228 | 0.659062 |
| <i>Rprd1b</i>        | chr2:158028496-158132297 | 6.1458   | 6.0347   | -0.0263 | 0.753013 |
| <i>Gm11457</i>       | chr2:164754241-164769666 | 9.4471   | 9.3606   | -0.0133 | 0.918581 |
| <i>Zfp335os</i>      | chr2:164911353-164919953 | 4.7689   | 4.7294   | -0.0120 | 0.894241 |

|                      |                          |          |          |         |          |
|----------------------|--------------------------|----------|----------|---------|----------|
| <i>Elmo2</i>         | chr2:165288030-165326479 | 9.5300   | 9.3872   | -0.0218 | 0.799795 |
| <i>Stau1</i>         | chr2:166947548-166996299 | 10.6877  | 10.5838  | -0.0141 | 0.893307 |
| <i>Znfx1</i>         | chr2:167035792-167063015 | 19.5124  | 19.2261  | -0.0213 | 0.819153 |
| <i>Fam210b</i>       | chr2:172345564-172355749 | 2.5369   | 2.4915   | -0.0260 | 0.889908 |
| <i>Gnas</i>          | chr2:174284319-174346744 | 28.3502  | 28.0566  | -0.0150 | 0.813608 |
| <i>Gm20721</i>       | chr2:174330318-174346712 | 202.1896 | 199.1262 | -0.0220 | 0.703100 |
| <i>Gm14326</i>       | chr2:177935992-177957297 | 0.8912   | 0.8629   | -0.0466 | 0.869765 |
| <i>Zfp931</i>        | chr2:178067694-178078476 | 4.6635   | 4.6293   | -0.0106 | 0.946444 |
| <i>Psm7</i>          | chr2:180036372-180042433 | 44.3102  | 43.7929  | -0.0169 | 0.887009 |
| <i>Col20a1</i>       | chr2:180986534-181017540 | 1.5292   | 1.5194   | -0.0093 | 0.925760 |
| <i>Uck1</i>          | chr2:181569148-181584892 | 18.6041  | 18.3185  | -0.0223 | 0.729249 |
| <i>mt-Rnr1</i>       | chrM:69-1024             | 865.2710 | 860.6942 | -0.0077 | 0.980084 |
| <i>Rps24-ps2</i>     | chr3:3791896-3792295     | 2.3054   | 2.2372   | -0.0433 | 0.924606 |
| <i>Gm16337</i>       | chr3:9757606-9786142     | 1.7433   | 1.7445   | 0.0009  | 0.996822 |
| <i>Ythdf3</i>        | chr3:16183182-16217035   | 43.5742  | 43.1304  | -0.0148 | 0.846333 |
| <i>Hps3</i>          | chr3:19995944-20035315   | 13.6427  | 13.4651  | -0.0189 | 0.763636 |
| <i>Hltf</i>          | chr3:20057810-20118490   | 28.4370  | 28.1096  | -0.0167 | 0.831888 |
| <i>Prkci</i>         | chr3:30995746-31052741   | 3.2626   | 3.2251   | -0.0167 | 0.812449 |
| <i>Pik3ca</i>        | chr3:32397670-32468486   | 24.9434  | 24.6543  | -0.0168 | 0.745798 |
| <i>Sclt1</i>         | chr3:41626716-41742514   | 3.4395   | 3.4103   | -0.0123 | 0.881832 |
| <i>Setd7</i>         | chr3:51515318-51560878   | 21.5215  | 21.3230  | -0.0134 | 0.859733 |
| <i>Selt</i>          | chr3:58576635-58593133   | 42.6288  | 42.2795  | -0.0119 | 0.905727 |
| <i>Rap2b</i>         | chr3:61364506-61368703   | 13.0355  | 12.8433  | -0.0214 | 0.864148 |
| <i>Gjm1</i>          | chr3:67430095-67476529   | 14.5967  | 14.3824  | -0.0213 | 0.671843 |
| <i>Arhgef11</i>      | chr3:87617558-87738034   | 5.4503   | 5.3593   | -0.0243 | 0.777559 |
| <i>Lenep</i>         | chr3:89400987-89402793   | 4.0202   | 3.9850   | -0.0127 | 0.904846 |
| <i>Ube2q1</i>        | chr3:89773608-89783997   | 38.3391  | 37.7595  | -0.0220 | 0.694858 |
| <i>Slc27a3</i>       | chr3:90385238-90389938   | 0.4606   | 0.4586   | -0.0060 | 0.990237 |
| <i>Celf3</i>         | chr3:94478830-94492193   | 0.5646   | 0.5648   | 0.0005  | 0.998811 |
| <i>Rprd2</i>         | chr3:95759872-95818953   | 9.4166   | 9.3308   | -0.0132 | 0.925512 |
| <i>Mtmt11</i>        | chr3:96162003-96171718   | 3.5047   | 3.4412   | -0.0264 | 0.677560 |
| <i>Cd101</i>         | chr3:100993529-101029556 | 7.7366   | 7.6469   | -0.0168 | 0.928600 |
| <i>Nras</i>          | chr3:103058338-103067914 | 48.2995  | 47.5657  | -0.0221 | 0.743876 |
| <i>Slc16a1</i>       | chr3:104638667-104658462 | 30.6757  | 30.2247  | -0.0214 | 0.719194 |
| <i>Gm12500</i>       | chr3:108085975-108088009 | 0.8264   | 0.8209   | -0.0097 | 0.954211 |
| <i>Taf13</i>         | chr3:108571697-108583222 | 4.0790   | 4.0337   | -0.0161 | 0.927660 |
| <i>Extl2</i>         | chr3:116007461-116029016 | 3.5976   | 3.5166   | -0.0328 | 0.858900 |
| <i>Rpl34</i>         | chr3:130726830-130730398 | 234.3718 | 228.6074 | -0.0359 | 0.894335 |
| <i>Aimp1</i>         | chr3:132660497-132683879 | 50.1065  | 49.3947  | -0.0206 | 0.845329 |
| <i>Snord45c</i>      | chr3:153912124-153912204 | 61.6250  | 60.0429  | -0.0375 | 0.884560 |
| <i>Zranb2</i>        | chr3:157534159-157548390 | 38.2530  | 37.8606  | -0.0149 | 0.871856 |
| <i>2610301B20Rik</i> | chr4:10874497-10899425   | 4.4256   | 4.3535   | -0.0237 | 0.894402 |
| <i>Gm11831</i>       | chr4:11501455-11502839   | 1.8610   | 1.8039   | -0.0449 | 0.921064 |
| <i>Tmem64</i>        | chr4:15265830-15286753   | 5.0739   | 5.0197   | -0.0155 | 0.861048 |
| <i>Osgin2</i>        | chr4:15997120-16013888   | 4.1984   | 4.1261   | -0.0251 | 0.681892 |
| <i>Mms22l</i>        | chr4:24496450-24602950   | 4.7004   | 4.6609   | -0.0122 | 0.940050 |
| <i>Gm24371</i>       | chr4:32514786-32515053   | 6.6088   | 6.4460   | -0.0360 | 0.783532 |
| <i>Ubap1</i>         | chr4:41348995-41390525   | 14.5500  | 14.2964  | -0.0254 | 0.689837 |
| <i>5830415F09Rik</i> | chr4:46376504-46389437   | 14.4019  | 14.2387  | -0.0164 | 0.885681 |
| <i>Tbc1d2</i>        | chr4:46604389-46650209   | 0.1743   | 0.1726   | -0.0142 | 0.954373 |
| <i>Fam206a</i>       | chr4:56802344-56809601   | 3.6621   | 3.6276   | -0.0136 | 0.804810 |
| <i>Fkbp15</i>        | chr4:62300341-62360548   | 20.2371  | 19.9217  | -0.0227 | 0.604806 |
| <i>Aknaos</i>        | chr4:63381357-63394018   | 16.6575  | 16.4283  | -0.0200 | 0.918873 |
| <i>Klh9</i>          | chr4:88718291-88722465   | 47.8420  | 47.2721  | -0.0173 | 0.869835 |
| <i>Mrpl37</i>        | chr4:107055873-107066868 | 8.4200   | 8.3224   | -0.0168 | 0.875297 |
| <i>Gm12743</i>       | chr4:108592424-108619849 | 0.4689   | 0.4615   | -0.0232 | 0.885277 |
| <i>Btf3l4</i>        | chr4:108814294-108833614 | 2.7328   | 2.7072   | -0.0136 | 0.897074 |
| <i>Osbpl9</i>        | chr4:109061144-109202272 | 23.8239  | 23.5190  | -0.0186 | 0.762314 |
| <i>Efcab14</i>       | chr4:115737743-11577327  | 6.7004   | 6.6170   | -0.0181 | 0.900714 |
| <i>Faah</i>          | chr4:115967144-116017926 | 13.5286  | 13.2827  | -0.0265 | 0.810831 |
| <i>Pomgnt1</i>       | chr4:116123839-116159849 | 5.2116   | 5.1589   | -0.0147 | 0.869914 |
| <i>Mast2</i>         | chr4:116306761-116464183 | 1.9987   | 1.9693   | -0.0214 | 0.842516 |
| <i>Pabpc4</i>        | chr4:123262350-123298925 | 8.4304   | 8.3562   | -0.0128 | 0.901526 |
| <i>Gm12924</i>       | chr4:123435616-123435934 | 4.3787   | 4.3702   | -0.0028 | 0.993131 |
| <i>Mycbp</i>         | chr4:123904831-123912269 | 7.7496   | 7.6685   | -0.0152 | 0.871138 |
| <i>Yrdc</i>          | chr4:124850678-124855242 | 22.5604  | 22.3046  | -0.0165 | 0.777235 |
| <i>Maneal</i>        | chr4:124855238-124862171 | 2.5216   | 2.4732   | -0.0280 | 0.846605 |
| <i>Sync</i>          | chr4:129287616-129308559 | 1.9581   | 1.9426   | -0.0115 | 0.951446 |
| <i>Gm10571</i>       | chr4:129855070-129856710 | 1.2844   | 1.2849   | 0.0005  | 0.998650 |
| <i>Fabp3</i>         | chr4:130308594-130315463 | 1.2114   | 1.2071   | -0.0051 | 0.984935 |
| <i>Gm17300</i>       | chr4:132351771-132353382 | 539.1790 | 536.3487 | -0.0076 | 0.979044 |

|                      |                           |           |           |         |          |
|----------------------|---------------------------|-----------|-----------|---------|----------|
| <i>Snora73b</i>      | chr4:132352321-132352526  | 1098.8551 | 1070.8064 | -0.0373 | 0.896624 |
| <i>Gpatch3</i>       | chr4:133574744-133584243  | 6.4801    | 6.4287    | -0.0115 | 0.935734 |
| <i>Gm16224</i>       | chr4:135143420-135144285  | 3.6489    | 3.6146    | -0.0136 | 0.966259 |
| <i>Gm27022</i>       | chr4:136347846-136349441  | 4.6240    | 4.5793    | -0.0140 | 0.889731 |
| <i>Pqlc2</i>         | chr4:139294028-139310708  | 1.1360    | 1.1140    | -0.0282 | 0.915688 |
| <i>Zbtb17</i>        | chr4:141444653-141467930  | 11.3879   | 11.2350   | -0.0195 | 0.831868 |
| <i>Gm13204</i>       | chr4:148569055-148569876  | 7.5000    | 7.4573    | -0.0082 | 0.953620 |
| <i>Aptd1</i>         | chr4:149127120-149137629  | 0.7721    | 0.7466    | -0.0484 | 0.841915 |
| <i>2610002J02Rik</i> | chr4:155249801-155256687  | 14.9189   | 14.7115   | -0.0202 | 0.821986 |
| <i>Tnfrsf18</i>      | chr4:156026163-156028895  | 33.0507   | 32.6171   | -0.0191 | 0.882001 |
| <i>Perm1</i>         | chr4:156215926-156221307  | 2.0637    | 2.0386    | -0.0176 | 0.869531 |
| <i>6330403K07Rik</i> | chr11:71031940-71033513   | 0.8038    | 0.7839    | -0.0361 | 0.935345 |
| <i>Gm25556</i>       | chr11:106186443-106186587 | 5.0966    | 4.9699    | -0.0363 | 0.895337 |
| <i>Gm15495</i>       | chr7:25442151-25443463    | 0.6965    | 0.6818    | -0.0307 | 0.956854 |
| <i>Gm17399</i>       | chr9:118150230-118170376  | 0.9440    | 0.9176    | -0.0408 | 0.936004 |
| <i>Trav6-4</i>       | chr14:53454295-53454782   | 2.2686    | 2.1741    | -0.0614 | 0.894014 |
| <i>Gm25541</i>       | chr2:27539804-27539930    | 6.5490    | 6.3383    | -0.0472 | 0.948175 |
| <i>Gm13783</i>       | chr2:91195905-91202778    | 1.2871    | 1.2809    | -0.0070 | 0.988787 |
| <i>Gm11722</i>       | chr11:107481915-107483107 | 1.5550    | 1.5173    | -0.0354 | 0.953042 |
| <i>Naip6</i>         | chr13:100281120-100317674 | 0.1125    | 0.1119    | -0.0074 | 0.993898 |
| <i>Tbc1d9</i>        | chr8:83165351-83272934    | 0.1403    | 0.1370    | -0.0342 | 0.949684 |
| <i>2700012I20Rik</i> | chr9:57075215-57076013    | 5.1518    | 5.1164    | -0.0099 | 0.968771 |
| <i>Dis3</i>          | chr14:99076633-99099770   | 17.2334   | 17.0216   | -0.0178 | 0.821811 |
| <i>Tsen34</i>        | chr7:3693374-3701023      | 4.4168    | 4.3631    | -0.0176 | 0.824667 |
| <i>Bag1</i>          | chr4:40936397-40948281    | 64.9650   | 64.1800   | -0.0175 | 0.911335 |
| <i>Map7</i>          | chr10:20148470-20281589   | 8.3924    | 8.3020    | -0.0156 | 0.963146 |
| <i>Slc19a1</i>       | chr10:77032240-77061002   | 4.3839    | 4.3277    | -0.0186 | 0.870924 |
| <i>Gm17249</i>       | chr10:84619331-84622578   | 3.8370    | 3.7795    | -0.0218 | 0.865543 |
| <i>Rps15a-ps6</i>    | chr11:6172643-6173036     | 1.8366    | 1.8157    | -0.0165 | 0.945364 |
| <i>Trappc12</i>      | chr12:28690628-28750453   | 24.5024   | 24.1560   | -0.0205 | 0.708465 |
| <i>2900026A02Rik</i> | chr5:113086322-113163351  | 1.5110    | 1.4884    | -0.0218 | 0.948465 |
| <i>Amz1</i>          | chr5:140724126-140761439  | 0.9942    | 0.9783    | -0.0233 | 0.870939 |
| <i>Usp47</i>         | chr7:112023505-112111386  | 45.2883   | 44.6801   | -0.0195 | 0.674802 |
| <i>Ap2a2</i>         | chr7:141562179-141633011  | 21.4555   | 21.1648   | -0.0197 | 0.756838 |
| <i>Gm15347</i>       | chr8:12860357-12877344    | 3.4710    | 3.3937    | -0.0325 | 0.939738 |
| <i>Dcun1d2</i>       | chr8:13255962-13288126    | 14.2117   | 14.0333   | -0.0182 | 0.787906 |
| <i>Ppp1r3b</i>       | chr8:35375740-35388124    | 1.8712    | 1.8503    | -0.0162 | 0.913359 |
| <i>Gm26521</i>       | chr9:20607765-20612485    | 0.9011    | 0.8937    | -0.0118 | 0.963223 |
| <i>Gm26377</i>       | chr9:78478527-78478635    | 7897.3224 | 7798.8455 | -0.0181 | 0.914626 |
| <i>F8</i>            | chrX:75172714-75382615    | 0.1481    | 0.1466    | -0.0153 | 0.954698 |
| <i>Trappc2</i>       | chrX:166440573-166453140  | 2.0702    | 2.0348    | -0.0249 | 0.833774 |
| <i>Rad21</i>         | chr15:51962604-51991760   | 48.4973   | 47.8534   | -0.0193 | 0.832319 |
| <i>Bcl2l2</i>        | chr14:54883376-54888234   | 1.4632    | 1.4459    | -0.0172 | 0.914781 |
| <i>Pdcd2</i>         | chr17:15519207-15527301   | 25.5628   | 25.2433   | -0.0181 | 0.845405 |
| <i>Tomm6</i>         | chr17:47686645-47688386   | 14.6739   | 14.4856   | -0.0186 | 0.933555 |
| <i>B630019A10Rik</i> | chr16:23175287-23224446   | 9.4222    | 9.2867    | -0.0209 | 0.777696 |
| <i>Gm10197</i>       | chr19:53371565-53371766   | 9.3218    | 9.1981    | -0.0193 | 0.939651 |
| <i>Tbc1d8</i>        | chr1:39371498-39478747    | 6.5749    | 6.4934    | -0.0180 | 0.814218 |
| <i>D230017M19Rik</i> | chr1:72236464-72274869    | 0.2980    | 0.2945    | -0.0173 | 0.937386 |
| <i>Kdsr</i>          | chr1:106720409-106759742  | 10.0877   | 9.9502    | -0.0198 | 0.863783 |
| <i>Zfp236</i>        | chr18:82593592-82692883   | 15.9170   | 15.7014   | -0.0197 | 0.604753 |
| <i>Gm13568</i>       | chr2:26457143-26458316    | 8.2030    | 8.0746    | -0.0228 | 0.942349 |
| <i>Odf2</i>          | chr2:29889220-29931746    | 11.2462   | 11.0965   | -0.0193 | 0.810976 |
| <i>NA</i>            | chr2:30237492-30238223    | 4.2676    | 4.2169    | -0.0172 | 0.964417 |
| <i>Gm12363</i>       | chr4:34842984-34843652    | 2.3351    | 2.3146    | -0.0127 | 0.979062 |
| <i>Rnf19b</i>        | chr4:129058270-129085886  | 16.8929   | 16.6526   | -0.0207 | 0.871148 |
| <i>Gm6189</i>        | chr1:80383103-80385188    | 0.4042    | 0.3948    | -0.0340 | 0.920908 |
| <i>4930563E22Rik</i> | chr11:72215137-72218450   | 1.1808    | 1.1621    | -0.0230 | 0.900752 |
| <i>Tnfaip1</i>       | chr11:78522849-78536332   | 5.7684    | 5.6889    | -0.0200 | 0.840715 |
| <i>NA</i>            | chr11:87443236-87443450   | 4.8527    | 4.7769    | -0.0227 | 0.945717 |
| <i>Mafg</i>          | chr11:120625116-120633600 | 3.6704    | 3.6241    | -0.0183 | 0.857225 |
| <i>Gpn3</i>          | chr5:122371875-122382902  | 16.3133   | 16.0976   | -0.0192 | 0.858588 |
| <i>Gm13856</i>       | chr6:34151928-34174235    | 2.7648    | 2.7210    | -0.0230 | 0.935537 |
| <i>Setmar</i>        | chr6:108065044-108077122  | 3.0623    | 3.0077    | -0.0260 | 0.906082 |
| <i>Prrt3</i>         | chr6:113494094-113501818  | 0.3809    | 0.3778    | -0.0115 | 0.972534 |
| <i>BC064078</i>      | chr6:128992960-129008040  | 0.8982    | 0.8853    | -0.0209 | 0.970664 |
| <i>Gm12758</i>       | chr7:34234376-34240207    | 6.2476    | 6.1683    | -0.0184 | 0.798770 |
| <i>Zscan2</i>        | chr7:80860919-80876516    | 8.6573    | 8.5410    | -0.0195 | 0.866230 |
| <i>Cd81</i>          | chr7:143052738-143067934  | 1.2434    | 1.2259    | -0.0204 | 0.960141 |
| <i>Mcph1</i>         | chr8:18595130-18803189    | 4.7857    | 4.7231    | -0.0190 | 0.846441 |
| <i>Ash2l</i>         | chr8:25816190-25847694    | 18.9029   | 18.6580   | -0.0188 | 0.797442 |



|               |                           |          |          |         |          |
|---------------|---------------------------|----------|----------|---------|----------|
| Hook3         | chr8:26021420-26119224    | 12.2707  | 12.1060  | -0.0195 | 0.651447 |
| Ubxn8         | chr8:33619585-33641976    | 12.2730  | 12.1010  | -0.0204 | 0.801179 |
| Klf2          | chr8:72319032-72321656    | 127.5936 | 125.7791 | -0.0207 | 0.916806 |
| Cwf19l2       | chr9:3404084-3479236      | 20.5114  | 20.2302  | -0.0199 | 0.860907 |
| Usp28         | chr9:48985384-49042517    | 36.4618  | 35.9724  | -0.0195 | 0.894873 |
| Anapc13       | chr9:102626295-102634241  | 31.0886  | 30.6957  | -0.0183 | 0.944841 |
| Tspan6        | chrX:133891067-133898429  | 0.6819   | 0.6739   | -0.0171 | 0.974469 |
| Trav2         | chr14:52567292-52568051   | 2.7430   | 2.6922   | -0.0269 | 0.956608 |
| Lats2         | chr14:57642076-57758388   | 11.4051  | 11.2511  | -0.0196 | 0.868611 |
| Ptk2b         | chr14:66153256-66281052   | 36.3711  | 35.8703  | -0.0200 | 0.847314 |
| Ppl           | chr16:5086290-5132481     | 0.2986   | 0.2948   | -0.0184 | 0.953443 |
| Gng3          | chr19:8836928-8839246     | 2.8951   | 2.8551   | -0.0200 | 0.903475 |
| Fkbp7         | chr2:76663043-76673116    | 1.4334   | 1.4165   | -0.0172 | 0.908627 |
| Traf6         | chr2:101678428-101701669  | 10.3583  | 10.2220  | -0.0191 | 0.811931 |
| Ppa2          | chr3:133310109-133378235  | 11.8816  | 11.7363  | -0.0177 | 0.794516 |
| Ybey          | chr10:76459568-76469114   | 1.8661   | 1.8362   | -0.0233 | 0.902496 |
| Abhd17a       | chr10:80583648-80590341   | 29.0108  | 28.6063  | -0.0203 | 0.914983 |
| Ctsa          | chr2:164832872-164841032  | 45.1330  | 44.5012  | -0.0203 | 0.757403 |
| Rogdi         | chr16:5008729-5013517     | 1.4420   | 1.4239   | -0.0182 | 0.965318 |
| Slc25a37      | chr14:69241850-69285103   | 5.9334   | 5.8569   | -0.0187 | 0.818478 |
| Ppip5k2       | chr1:97706047-97770411    | 13.0357  | 12.8676  | -0.0187 | 0.793881 |
| Gm25635       | chr10:9852018-9852149     | 2.6234   | 2.5257   | -0.0548 | 0.943671 |
| Olig3         | chr10:19356559-19358606   | 0.2525   | 0.2778   | 0.1377  | 0.810281 |
| Rps19-ps11    | chr10:43373487-43373920   | 1.3937   | 1.3062   | -0.0936 | 0.860310 |
| Snord98       | chr10:62765575-62765640   | 10.1890  | 8.2016   | -0.3130 | 0.192059 |
| Gm16135       | chr10:62998778-62999689   | 1.1721   | 1.3216   | 0.1731  | 0.665050 |
| 1700040L02Rik | chr10:68430952-68541896   | 0.4307   | 0.4646   | 0.1094  | 0.818832 |
| Mir678        | chr10:76207325-76207409   | 4.5509   | 3.2755   | -0.4744 | 0.417960 |
| 2610028H24Rik | chr10:76449080-76461110   | 0.3599   | 0.4153   | 0.2066  | 0.698087 |
| Gm22721       | chr10:80382301-80382384   | 7.7026   | 3.3500   | -1.2012 | 0.150652 |
| Pmch          | chr10:88091071-88092375   | 0.6059   | 0.6352   | 0.0681  | 0.900127 |
| Amdhd1        | chr10:93523337-93540033   | 0.3356   | 0.1663   | -1.0130 | 0.106520 |
| Osbp18        | chr10:111164801-111297247 | 52.7631  | 49.3597  | -0.0962 | 0.332586 |
| Cyp27b1       | chr10:127048249-127053006 | 0.2464   | 0.2410   | -0.0322 | 0.951917 |
| Rdh9          | chr10:127759786-127792697 | 0.1032   | 0.1420   | 0.4606  | 0.618660 |
| Slc39a5       | chr10:128395933-128401224 | 0.2833   | 0.2753   | -0.0411 | 0.924329 |
| Gm25361       | chr10:128402757-128402833 | 7.3969   | 6.0743   | -0.2842 | 0.697819 |
| Itga7         | chr10:128933812-128958277 | 0.1199   | 0.1608   | 0.4240  | 0.437647 |
| Gm12735       | chr11:3193515-3194263     | 1.3338   | 0.8412   | -0.6650 | 0.192277 |
| Smtn          | chr11:3517522-3540612     | 0.1366   | 0.0833   | -0.7137 | 0.248778 |
| Gm24958       | chr11:5038210-5038307     | 3.4035   | 3.0396   | -0.1632 | 0.727510 |
| Gm11964       | chr11:5634138-5634582     | 1.5468   | 1.6437   | 0.0877  | 0.856376 |
| Gm11975       | chr11:6559022-6559503     | 1.2048   | 1.3396   | 0.1529  | 0.635184 |
| Gm11989       | chr11:8383181-8383853     | 0.7602   | 1.0046   | 0.4021  | 0.243717 |
| 1700042O10Rik | chr11:11868122-11885321   | 0.3813   | 0.2215   | -0.7838 | 0.184343 |
| Bcl11a        | chr11:24078055-24174123   | 0.0229   | 0.0418   | 0.8684  | 0.177141 |
| Il9r          | chr11:32187540-32200279   | 0.1297   | 0.0555   | -1.2256 | 0.205365 |
| NA            | chr11:33172917-33173368   | 0.6539   | 0.4818   | -0.4408 | 0.604555 |
| Gm12192       | chr11:49697879-49698366   | 1.3657   | 1.5430   | 0.1761  | 0.705628 |
| Rpl9-ps3      | chr11:53501183-53501762   | 1.1217   | 0.5982   | -0.9069 | 0.084232 |
| 1700007J10Rik | chr11:59725916-59740154   | 0.5626   | 0.4403   | -0.3536 | 0.546147 |
| Rasd1         | chr11:59963180-59964944   | 0.2273   | 0.3310   | 0.5425  | 0.176178 |
| Alox8         | chr11:69183931-69197843   | 0.1188   | 0.1455   | 0.2928  | 0.713086 |
| Rpl23a-ps2    | chr11:70879427-70879901   | 1.3935   | 1.2711   | -0.1326 | 0.788500 |
| Gm12322       | chr11:70909256-70909645   | 1.6543   | 1.4666   | -0.1737 | 0.650165 |
| Spns3         | chr11:72494918-72550506   | 0.0907   | 0.0737   | -0.2983 | 0.596226 |
| Gm12335       | chr11:75066435-75066762   | 1.0869   | 1.7295   | 0.6702  | 0.337525 |
| NA            | chr11:77149627-77150525   | 0.5879   | 0.5261   | -0.1603 | 0.761577 |
| Slc46a1       | chr11:78465696-78472059   | 0.2248   | 0.1861   | -0.2730 | 0.707243 |
| D11Bhm181e    | chr11:78561318-78561600   | 1.8147   | 2.1572   | 0.2495  | 0.623406 |
| Gm11196       | chr11:78585160-78585555   | 1.4689   | 1.5869   | 0.1114  | 0.732198 |
| Gm11425       | chr11:83027499-83027997   | 1.2309   | 1.3538   | 0.1373  | 0.654142 |
| Snord7        | chr11:83294303-83294400   | 5.1254   | 4.5112   | -0.1841 | 0.662390 |
| Gm25427       | chr11:86333205-86333308   | 4.4803   | 2.8134   | -0.6713 | 0.305480 |
| Gm9378        | chr11:87078786-87079257   | 1.0803   | 0.4694   | -1.2027 | 0.103986 |
| NA            | chr11:87471367-87471581   | 2.1430   | 2.9878   | 0.4795  | 0.478581 |
| Samd14        | chr11:95009878-95026087   | 0.1084   | 0.1086   | 0.0031  | 0.996246 |
| Gm11522       | chr11:95462545-95462721   | 2.1708   | 1.5451   | -0.4906 | 0.432147 |
| Gm11592       | chr11:97280127-97282897   | 1.0191   | 0.9137   | -0.1575 | 0.765297 |
| Gm11614       | chr11:97723650-97725711   | 0.5263   | 0.4461   | -0.2385 | 0.782922 |
| Gm11633       | chr11:97968791-97969235   | 1.7646   | 1.1933   | -0.5644 | 0.044784 |

|               |                           |         |         |          |          |
|---------------|---------------------------|---------|---------|----------|----------|
| Rnu2-10       | chr11:101658237-101658428 | 3.9897  | 2.1164  | -0.9146  | 0.056872 |
| Etv4          | chr11:101769741-101785371 | 0.2177  | 0.2369  | 0.1218   | 0.660461 |
| Arhgap27os1   | chr11:103363212-103364651 | 0.7119  | 0.4561  | -0.6424  | 0.141905 |
| NA            | chr11:106725257-106725450 | 3.3397  | 1.3286  | -1.3298  | 0.010281 |
| Gm11712       | chr11:107386982-107388971 | 1.9874  | 1.1615  | -0.7749  | 0.140682 |
| Gm11674       | chr11:111796346-111800876 | 0.2200  | 0.1393  | -0.6589  | 0.190531 |
| 4732490B19Rik | chr11:113203314-113209669 | 0.2356  | 0.2630  | 0.1585   | 0.755396 |
| Gm11693       | chr11:113678529-113679331 | 1.3961  | 1.1028  | -0.3402  | 0.393213 |
| Qrich2        | chr11:116441324-116455237 | 0.2640  | 0.2765  | 0.0667   | 0.915296 |
| Ppp1r27       | chr11:120549978-120551132 | 0.7941  | 0.5462  | -0.5398  | 0.443547 |
| Dcxr          | chr11:120725398-120727281 | 0.3715  | 0.4585  | 0.3034   | 0.748530 |
| Gm11793       | chr11:121106146-121107127 | 0.6047  | 0.6525  | 0.1098   | 0.516207 |
| Dtnbos        | chr12:3752542-3762146     | 0.4047  | 0.3871  | -0.0642  | 0.847843 |
| Gm3625        | chr12:4592825-4592927     | 3.7126  | 3.2124  | -0.2088  | 0.747743 |
| 5730507C01Rik | chr12:18514737-18534191   | 0.3804  | 0.2364  | -0.6860  | 0.300648 |
| Gm20535       | chr12:21252117-21255952   | 0.6362  | 0.3197  | -0.9927  | 0.019625 |
| Gm16267       | chr12:33111961-33138945   | 0.5456  | 0.4266  | -0.3549  | 0.661846 |
| Gm20403       | chr12:54986157-54986529   | 2.3871  | 1.3306  | -0.8432  | 0.044447 |
| Insm2         | chr12:55598916-55602018   | 0.2623  | 0.1538  | -0.7702  | 0.046072 |
| Gm3086        | chr12:69963472-69969721   | 0.7642  | 0.8194  | 0.1006   | 0.862158 |
| Trim9         | chr12:70244538-70347614   | 0.0603  | 0.0445  | -0.4373  | 0.456072 |
| Tomm20l       | chr12:7111427-71123222    | 1.1842  | 0.8705  | -0.4440  | 0.384381 |
| Scarna3b      | chr12:80391612-80391751   | 4.6784  | 4.9570  | 0.0834   | 0.863791 |
| Spata7        | chr12:98628156-98669815   | 0.1351  | 0.1224  | -0.1430  | 0.737962 |
| Gm8482        | chr12:100863968-100864439 | 1.0231  | 0.6201  | -0.7223  | 0.309065 |
| Gm20036       | chr12:101913239-101915335 | 0.5874  | 0.6197  | 0.0774   | 0.915800 |
| Gm17032       | chr12:106327367-106330821 | 1.4404  | 1.3565  | -0.0866  | 0.883807 |
| Begain        | chr12:109032186-109068217 | 0.1920  | 0.2029  | 0.0791   | 0.818681 |
| Adssl1        | chr12:112620044-112641354 | 0.2239  | 0.2971  | 0.4080   | 0.524825 |
| Ighg1         | chr12:113328975-113330523 | 0.2983  | 0.0193  | -3.9494  | 0.386518 |
| Ighj4         | chr12:113428513-113428567 | 13.4034 | 12.3161 | -0.1221  | 0.822071 |
| Ighj3         | chr12:113429084-113429132 | 12.1650 | 8.5115  | -0.5153  | 0.366406 |
| Ighv5-4       | chr12:113597445-113597905 | 0.6533  | 0.0001  | -12.6734 | 0.155102 |
| Ighv1-18      | chr12:114682673-114683065 | 0.5790  | 0.0001  | -12.4994 | 0.296101 |
| Gm25444       | chr13:14628618-14628731   | 4.0749  | 2.4199  | -0.7518  | 0.266536 |
| Mir466i       | chr13:17747472-17747593   | 4.0511  | 5.0293  | 0.3121   | 0.603030 |
| Gm11307       | chr13:22675659-22676969   | 0.2643  | 0.1182  | -1.1606  | 0.404162 |
| Gm11344       | chr13:24410105-24410440   | 2.4858  | 1.4676  | -0.7602  | 0.083069 |
| Gm22358       | chr13:24811446-24811568   | 5.4368  | 6.0131  | 0.1453   | 0.544290 |
| 4932702P03Rik | chr13:24905592-24914272   | 0.0973  | 0.1013  | 0.0570   | 0.932302 |
| Gm11366       | chr13:30181715-30182144   | 1.2733  | 1.5949  | 0.3249   | 0.664185 |
| Cap2          | chr13:46501847-46649642   | 0.1949  | 0.1704  | -0.1933  | 0.578569 |
| Rnf144b       | chr13:47122719-47247991   | 0.1473  | 0.1086  | -0.4398  | 0.598430 |
| Mirlet7a-1    | chr13:48538178-48538272   | 5.5012  | 5.4575  | -0.0115  | 0.973982 |
| Ecm2          | chr13:49504809-49532789   | 0.1419  | 0.1896  | 0.4184   | 0.374234 |
| Ogn           | chr13:49608070-49624500   | 0.2341  | 0.2456  | 0.0693   | 0.910458 |
| Cks2          | chr13:51645231-51650660   | 0.9855  | 0.9252  | -0.0910  | 0.748131 |
| Dbn1          | chr13:55473428-55488111   | 0.1520  | 0.1583  | 0.0590   | 0.917695 |
| Gkap1         | chr13:58233350-58274188   | 0.4326  | 0.4578  | 0.0814   | 0.811624 |
| Gm10775       | chr13:65259538-65260826   | 0.2056  | 0.1969  | -0.0627  | 0.934391 |
| Spata9        | chr13:75967738-75998968   | 0.3582  | 0.3152  | -0.1845  | 0.773165 |
| Mctp1         | chr13:76384534-77031810   | 0.0755  | 0.0878  | 0.2176   | 0.651372 |
| Gm8399        | chr13:81064683-81065803   | 0.4269  | 0.2926  | -0.5450  | 0.407005 |
| Mef2c         | chr13:83504033-83667079   | 0.0827  | 0.0945  | 0.1922   | 0.671881 |
| Gm22574       | chr13:86044988-86045048   | 10.0409 | 5.7524  | -0.8037  | 0.334668 |
| Vcan          | chr13:89655311-89742509   | 0.0367  | 0.0470  | 0.3547   | 0.144700 |
| Gm20379       | chr13:92306088-92306337   | 1.6148  | 1.7051  | 0.0785   | 0.909553 |
| Gm26619       | chr13:97751111-97760965   | 0.6492  | 0.5169  | -0.3287  | 0.589431 |
| Gm10260       | chr13:97760129-97760588   | 1.5174  | 1.2082  | -0.3288  | 0.589431 |
| 2610204G07Rik | chr13:104684930-104694994 | 0.4884  | 0.5708  | 0.2250   | 0.502326 |
| Gm15327       | chr13:111809140-111811039 | 0.4163  | 0.3444  | -0.2736  | 0.728599 |
| Rpl31-ps5     | chr5:20806089-20806464    | 0.7387  | 0.6330  | -0.2228  | 0.810200 |
| Snord93       | chr5:23852209-23852280    | 5.2032  | 2.3019  | -1.1766  | 0.255255 |
| Gareml        | chr5:30105160-30118378    | 0.1196  | 0.1888  | 0.6579   | 0.134389 |
| Cgref1        | chr5:30933145-30945480    | 0.2767  | 0.3219  | 0.2180   | 0.770481 |
| Gm10059       | chr5:33759365-33759536    | 3.8860  | 4.0648  | 0.0649   | 0.885471 |
| NA            | chr5:34395549-34395653    | 2.5151  | 1.9542  | -0.3641  | 0.698220 |
| Hgfac         | chr5:35041552-35048436    | 0.3143  | 0.1921  | -0.7105  | 0.211579 |
| Psap11        | chr5:36204020-36206568    | 0.1195  | 0.0713  | -0.7448  | 0.510280 |
| Ccdc96        | chr5:36484587-36488171    | 0.1381  | 0.1532  | 0.1492   | 0.699484 |
| Gm25767       | chr5:36671657-36671781    | 5.7557  | 4.0073  | -0.5224  | 0.242800 |

|               |                          |         |         |         |          |
|---------------|--------------------------|---------|---------|---------|----------|
| Gm5555        | chr5:49552256-49553270   | 0.4992  | 0.6799  | 0.4459  | 0.495028 |
| Chrna9        | chr5:65934920-65977326   | 0.2418  | 0.1574  | -0.6198 | 0.010497 |
| Usp46os1      | chr5:74014215-74029680   | 0.8316  | 1.1557  | 0.4749  | 0.328296 |
| Pbbp          | chr5:90768517-90770060   | 0.2545  | 0.3035  | 0.2538  | 0.767489 |
| Gm23031       | chr5:92302173-92302292   | 2.4906  | 2.3329  | -0.0944 | 0.914576 |
| Gm17304       | chr5:106609097-106609201 | 4.0142  | 7.2358  | 0.8500  | 0.317859 |
| Gm24191       | chr5:106669998-106670121 | 6.2338  | 2.8638  | -1.1222 | 0.017036 |
| Gm15484       | chr5:110118021-110118849 | 0.8008  | 0.8176  | 0.0299  | 0.937949 |
| Gm15788       | chr5:110262160-110277267 | 0.4867  | 0.6670  | 0.4546  | 0.517794 |
| Mn1           | chr5:111417361-111457033 | 0.0707  | 0.0528  | -0.4215 | 0.355179 |
| Gm6583        | chr5:112353800-112356033 | 0.1632  | 0.2219  | 0.4430  | 0.459436 |
| Crybb3        | chr5:113075838-113081584 | 0.3128  | 0.0774  | -2.0150 | 0.121131 |
| Fam222a       | chr5:114568015-114613220 | 0.1961  | 0.1401  | -0.4856 | 0.193888 |
| Gm13827       | chr5:115053420-115053846 | 1.2022  | 2.0792  | 0.7904  | 0.244344 |
| Gm13831       | chr5:115263092-115263394 | 1.6228  | 1.2823  | -0.3397 | 0.448857 |
| Sds           | chr5:120476530-120483932 | 0.2970  | 0.3524  | 0.2471  | 0.671469 |
| Gm15860       | chr5:123334331-123344437 | 0.4802  | 0.6701  | 0.4808  | 0.368970 |
| Rsrc2         | chr5:123728425-123749414 | 37.9941 | 37.3180 | -0.0259 | 0.752868 |
| Nupr1l        | chr5:129908567-129910396 | 0.2320  | 0.3192  | 0.4608  | 0.520744 |
| Gm15921       | chr5:130208079-130208562 | 1.1902  | 0.4179  | -1.5100 | 0.012447 |
| Gm15701       | chr5:136102603-136104436 | 0.7736  | 0.5097  | -0.6019 | 0.399257 |
| Myl10         | chr5:136693145-136701094 | 0.8284  | 0.6858  | -0.2725 | 0.488758 |
| Irs3          | chr5:137643031-137645714 | 0.1764  | 0.1355  | -0.3806 | 0.641695 |
| Pilrb2        | chr5:137865828-137871758 | 0.1631  | 0.3401  | 1.0597  | 0.418191 |
| Mblac1        | chr5:138194313-138195621 | 0.5546  | 0.4344  | -0.3525 | 0.553429 |
| C130050O18Rik | chr5:139405279-139415623 | 0.1964  | 0.1208  | -0.7008 | 0.319352 |
| Gm16122       | chr5:140074104-140085512 | 0.3254  | 0.3632  | 0.1584  | 0.764300 |
| Gm6433        | chr5:141267580-141268455 | 0.5350  | 0.8556  | 0.6775  | 0.219646 |
| D430018E03Rik | chr5:142874076-142878373 | 0.2236  | 0.1138  | -0.9742 | 0.121890 |
| Gm17135       | chr5:143922576-143980991 | 0.9824  | 0.7773  | -0.3380 | 0.590459 |
| Gm24311       | chr5:144013997-144014101 | 3.6391  | 1.9313  | -0.9140 | 0.133479 |
| Fam71f2       | chr6:29279592-29290680   | 0.4307  | 0.5417  | 0.3308  | 0.516890 |
| Ccdc136       | chr6:29396308-29426994   | 0.0668  | 0.0890  | 0.4138  | 0.648378 |
| Rpl30-ps1     | chr6:38376806-38377154   | 2.1388  | 1.4361  | -0.5746 | 0.332779 |
| Klrg2         | chr6:38626659-38637239   | 0.2406  | 0.3137  | 0.3826  | 0.346686 |
| Fam131b       | chr6:42315311-42324643   | 0.1772  | 0.1208  | -0.5525 | 0.150315 |
| Gm15550       | chr6:43373804-43374878   | 0.5076  | 0.4442  | -0.1923 | 0.557272 |
| Hoxaas3       | chr6:52175216-52215076   | 0.2501  | 0.2154  | -0.2158 | 0.744149 |
| Igkv5-39      | chr6:69900423-69900710   | 1.9545  | 1.1329  | -0.7868 | 0.624088 |
| Actg2         | chr6:83512904-83536265   | 0.2950  | 0.3291  | 0.1577  | 0.702926 |
| Mgll          | chr6:88724411-88828360   | 0.1009  | 0.0865  | -0.2222 | 0.623287 |
| Gm24816       | chr6:90681369-90681518   | 3.0426  | 3.4303  | 0.1730  | 0.800969 |
| Grip2         | chr6:91761508-91827250   | 0.0877  | 0.0531  | -0.7238 | 0.128052 |
| March8        | chr6:116338023-116409540 | 0.1036  | 0.1063  | 0.0376  | 0.927915 |
| Lrtm2         | chr6:119315132-119330766 | 0.1382  | 0.0989  | -0.4823 | 0.279019 |
| Gm23851       | chr6:124964284-124964387 | 6.1543  | 7.0813  | 0.2024  | 0.668578 |
| Gm10069       | chr6:128438756-128475617 | 0.1945  | 0.1198  | -0.6997 | 0.110953 |
| Clec2f        | chr6:129018581-129020519 | 1.1838  | 0.1950  | -2.6018 | 0.050538 |
| Klra5         | chr6:129898995-129917650 | 0.3530  | 0.3269  | -0.1108 | 0.913373 |
| Mansc4        | chr6:147075059-147087032 | 0.3753  | 0.5616  | 0.5814  | 0.093517 |
| D030047H15Rik | chr7:4126339-4136926     | 0.2634  | 0.2560  | -0.0413 | 0.939948 |
| Gm15494       | chr7:4446445-4471285     | 2.2010  | 0.3989  | -2.4639 | 0.042553 |
| Gm6792        | chr7:6252709-6282066     | 0.6457  | 0.5773  | -0.1614 | 0.661013 |
| Gm19345       | chr7:19852002-19858347   | 0.6068  | 0.4872  | -0.3167 | 0.724911 |
| Gm9844        | chr7:24862201-24862675   | 1.3925  | 1.0799  | -0.3668 | 0.083581 |
| Gm9844        | chr7:24862212-24862697   | 1.3609  | 1.0554  | -0.3668 | 0.083581 |
| Atp1a3        | chr7:24978166-25005957   | 0.0664  | 0.0607  | -0.1296 | 0.877217 |
| Hipk4         | chr7:27523266-27531175   | 0.2362  | 0.1352  | -0.8045 | 0.066853 |
| Gm26891       | chr7:27927723-27931003   | 0.1997  | 0.2528  | 0.3398  | 0.429151 |
| Mir1964       | chr7:29773293-29773376   | 6.7335  | 5.2719  | -0.3530 | 0.382103 |
| Cox7a1        | chr7:30184170-30186028   | 2.3425  | 1.5758  | -0.5720 | 0.411039 |
| Thap8         | chr7:30280093-30290237   | 0.3277  | 0.3080  | -0.0894 | 0.881469 |
| Rgs9bp        | chr7:35578997-35585582   | 0.0664  | 0.0668  | 0.0073  | 0.988574 |
| Plekhf1       | chr7:38220653-38227994   | 0.3213  | 0.3749  | 0.2227  | 0.691889 |
| Gm26526       | chr7:39588517-39591679   | 0.1415  | 0.1185  | -0.2560 | 0.652308 |
| Gm2058        | chr7:39588930-39589717   | 0.6618  | 0.4630  | -0.5155 | 0.499715 |
| Gm6851        | chr7:40190908-40191346   | 1.1681  | 1.5427  | 0.4013  | 0.476227 |
| 9830147E19Rik | chr7:42609525-42642588   | 0.1084  | 0.1137  | 0.0698  | 0.877250 |
| Snord88c      | chr7:44249851-44249941   | 9.1531  | 6.5236  | -0.4886 | 0.350840 |
| Spib          | chr7:44525994-44532071   | 0.1458  | 0.2181  | 0.5813  | 0.301899 |
| Napsa         | chr7:44572431-44586862   | 0.2306  | 0.3402  | 0.5612  | 0.371006 |

|                      |                          |        |        |         |          |
|----------------------|--------------------------|--------|--------|---------|----------|
| <i>Dkk1</i>          | chr7:45207524-45211883   | 0.4157 | 0.6717 | 0.6922  | 0.259373 |
| <i>Lhb</i>           | chr7:45418352-45421854   | 0.2407 | 0.2725 | 0.1789  | 0.688847 |
| <i>Lmtk3</i>         | chr7:45783737-45804144   | 0.1532 | 0.0769 | -0.9950 | 0.038143 |
| <i>Syngr4</i>        | chr7:45885221-45896714   | 0.5808 | 0.4020 | -0.5307 | 0.213443 |
| <i>Gm7367</i>        | chr7:60155537-60156170   | 0.3282 | 1.0727 | 1.7086  | 0.049804 |
| <i>6330403N20Rik</i> | chr7:80297727-80299616   | 0.4110 | 0.4186 | 0.0262  | 0.972890 |
| <i>Gm6415</i>        | chr7:81161396-81161744   | 2.0448 | 1.8407 | -0.1517 | 0.700895 |
| <i>Rps11-ps5</i>     | chr7:96435545-96435999   | 0.9327 | 0.6016 | -0.6325 | 0.354933 |
| <i>Gab2</i>          | chr7:97081750-97308940   | 0.0962 | 0.0943 | -0.0282 | 0.964048 |
| <i>Gm10605</i>       | chr7:99625935-99631711   | 0.1644 | 0.1545 | -0.0894 | 0.834753 |
| <i>Gpx2-ps1</i>      | chr7:100264943-100265246 | 1.3464 | 1.2794 | -0.0736 | 0.905663 |
| <i>Gm4887</i>        | chr7:104821203-104822256 | 0.6029 | 0.5577 | -0.1123 | 0.740963 |
| <i>Gm22504</i>       | chr7:105642337-105642476 | 4.2789 | 4.7588 | 0.1534  | 0.641502 |
| <i>Gm22372</i>       | chr7:106426711-106426847 | 3.0379 | 2.9663 | -0.0344 | 0.946854 |
| <i>Gm15994</i>       | chr7:113324257-113324659 | 1.1469 | 0.4604 | -1.3167 | 0.021013 |
| <i>Tmem159</i>       | chr7:120102375-120120992 | 0.2313 | 0.3535 | 0.6120  | 0.069246 |
| <i>Gm26414</i>       | chr7:122446857-122447126 | 2.2992 | 1.6354 | -0.4915 | 0.071330 |
| <i>Gm17136</i>       | chr7:126176123-126176534 | 1.4109 | 1.4750 | 0.0641  | 0.884841 |
| <i>Asphd1</i>        | chr7:126945566-126949582 | 0.4259 | 0.4156 | -0.0354 | 0.860195 |
| <i>D830044I16Rik</i> | chr7:126971719-126976098 | 0.2319 | 0.2144 | -0.1131 | 0.816411 |
| <i>Gm5903</i>        | chr7:130343524-130354373 | 0.0981 | 0.1722 | 0.8118  | 0.365230 |
| <i>Btbd16</i>        | chr7:130774068-130825897 | 0.1683 | 0.2146 | 0.3505  | 0.505287 |
| <i>Pwwp2b</i>        | chr7:139248481-139267253 | 0.1944 | 0.2297 | 0.2407  | 0.375750 |
| <i>Nkx6-2</i>        | chr7:139579376-139582797 | 0.2774 | 0.1442 | -0.9433 | 0.022560 |
| <i>Muc5b</i>         | chr7:141839071-141873085 | 0.0340 | 0.0418 | 0.3006  | 0.575881 |
| <i>Rprl3</i>         | chr8:3803068-3803358     | 1.7194 | 2.8362 | 0.7220  | 0.145361 |
| <i>Gm16589</i>       | chr8:4087542-4089900     | 0.2354 | 0.3820 | 0.6983  | 0.175675 |
| <i>Gm26102</i>       | chr8:4274852-4275136     | 1.6335 | 2.7083 | 0.7294  | 0.008137 |
| <i>Gm7461</i>        | chr8:4677538-4678365     | 0.5787 | 0.8554 | 0.5638  | 0.500149 |
| <i>Grtp1</i>         | chr8:13176868-13200624   | 0.4425 | 0.5439 | 0.2976  | 0.443203 |
| <i>1700029H14Rik</i> | chr8:13550732-13562461   | 0.4672 | 0.4667 | -0.0014 | 0.997463 |
| <i>Xkr5</i>          | chr8:18932728-18950975   | 0.1348 | 0.1375 | 0.0293  | 0.927461 |
| <i>Fgfr1</i>         | chr8:25513653-25575714   | 0.0523 | 0.0425 | -0.3001 | 0.695281 |
| <i>Smim18</i>        | chr8:33742113-33747770   | 1.0733 | 0.8745 | -0.2955 | 0.473073 |
| <i>Rps12l2</i>       | chr8:36025752-36026133   | 1.7411 | 0.9734 | -0.8390 | 0.090882 |
| <i>Gm16205</i>       | chr8:37787665-37788692   | 0.4008 | 0.6087 | 0.6026  | 0.210154 |
| <i>Fgf20</i>         | chr8:40279165-40308331   | 0.3976 | 0.3066 | -0.3753 | 0.457349 |
| <i>Gm9755</i>        | chr8:67513999-67515606   | 0.3815 | 0.2960 | -0.3663 | 0.386298 |
| <i>Tm6sf2</i>        | chr8:70072923-70080066   | 0.4403 | 0.2988 | -0.5594 | 0.098260 |
| <i>Cib3</i>          | chr8:72204334-72212837   | 0.4490 | 0.9444 | 1.0726  | 0.305368 |
| <i>NA</i>            | chr8:72239201-72239482   | 1.4809 | 2.5993 | 0.8116  | 0.050067 |
| <i>Hmox1</i>         | chr8:75093590-75100596   | 0.3050 | 0.3411 | 0.1616  | 0.747974 |
| <i>Frem3</i>         | chr8:80611079-80695356   | 0.0928 | 0.1073 | 0.2107  | 0.723061 |
| <i>Mir27a</i>        | chr8:84208671-84208758   | 4.9422 | 5.6548 | 0.1943  | 0.636883 |
| <i>Rtbdn</i>         | chr8:84946990-84956603   | 0.1713 | 0.1135 | -0.5943 | 0.317572 |
| <i>Gm5741</i>        | chr8:85067567-85067982   | 2.1099 | 1.1218 | -0.9113 | 0.014085 |
| <i>Gpt2</i>          | chr8:85492575-85527560   | 0.1132 | 0.1237 | 0.1275  | 0.679995 |
| <i>Gm3235</i>        | chr8:91621447-91629729   | 0.8777 | 0.3922 | -1.1622 | 0.014819 |
| <i>Lpcat2</i>        | chr8:92855349-92919279   | 0.0919 | 0.1627 | 0.8242  | 0.141334 |
| <i>Ndrg4</i>         | chr8:95676979-95715119   | 0.0737 | 0.0948 | 0.3632  | 0.577103 |
| <i>Gm22063</i>       | chr8:105172495-105172602 | 3.4594 | 3.4111 | -0.0203 | 0.977401 |
| <i>Mir328</i>        | chr8:105308363-105308460 | 6.4142 | 6.7800 | 0.0800  | 0.800178 |
| <i>1810019D21Rik</i> | chr8:106135399-106138525 | 0.3819 | 0.1416 | -1.4318 | 0.049751 |
| <i>Rps18-ps3</i>     | chr8:107262816-107263248 | 1.1157 | 1.2276 | 0.1378  | 0.548449 |
| <i>Zfx3</i>          | chr8:108714643-108961636 | 0.0305 | 0.0278 | -0.1338 | 0.774115 |
| <i>Osgin1</i>        | chr8:119434123-119446256 | 0.2212 | 0.1451 | -0.6090 | 0.328097 |
| <i>Car5a</i>         | chr8:121916125-121944904 | 0.3761 | 0.3116 | -0.2717 | 0.614443 |
| <i>Gm27854</i>       | chr8:123265778-123266005 | 2.9454 | 3.3043 | 0.1659  | 0.604348 |
| <i>Mmp8</i>          | chr9:7558428-7568486     | 0.2094 | 0.1205 | -0.7970 | 0.430742 |
| <i>Gm5611</i>        | chr9:17030044-17030899   | 0.2999 | 0.2654 | -0.1764 | 0.847038 |
| <i>Gm7808</i>        | chr9:19927895-19928282   | 1.5825 | 0.7583 | -1.0613 | 0.002271 |
| <i>Gm26592</i>       | chr9:21034289-21037782   | 0.2715 | 0.2330 | -0.2205 | 0.722121 |
| <i>Zglp1</i>         | chr9:21062392-21067093   | 0.6816 | 0.3246 | -1.0705 | 0.060642 |
| <i>Mir199a-1</i>     | chr9:21496494-21496564   | 8.6389 | 3.6825 | -1.2302 | 0.193771 |
| <i>Gm22060</i>       | chr9:32446821-32446928   | 4.8563 | 4.4699 | -0.1196 | 0.840196 |
| <i>Kirrel3os</i>     | chr9:34918232-34929509   | 0.1308 | 0.0620 | -1.0776 | 0.123466 |
| <i>Pate2</i>         | chr9:35570283-35690318   | 0.1621 | 0.1284 | -0.3367 | 0.310471 |
| <i>Tpt1-ps5</i>      | chr9:37696514-37697033   | 0.7224 | 0.9523 | 0.3987  | 0.576152 |
| <i>Olfir920</i>      | chr9:38752795-38756863   | 0.2756 | 0.2267 | -0.2822 | 0.706522 |
| <i>Tecta</i>         | chr9:42329618-42399929   | 0.0760 | 0.0423 | -0.8435 | 0.030963 |
| <i>Tmem25</i>        | chr9:44793775-44799307   | 0.1571 | 0.1512 | -0.0554 | 0.896366 |

|               |                           |          |          |          |          |
|---------------|---------------------------|----------|----------|----------|----------|
| Gm20612       | chr9:45261054-45261290    | 1.7912   | 1.4643   | -0.2907  | 0.650554 |
| Nxpe4         | chr9:48362040-48400025    | 0.1472   | 0.0463   | -1.6687  | 0.029506 |
| Pih1d2        | chr9:50617320-50625000    | 0.2288   | 0.2625   | 0.1978   | 0.738028 |
| Gm22304       | chr9:53639976-53640105    | 4.3072   | 4.9515   | 0.2011   | 0.693363 |
| Rab39         | chr9:53684109-53706232    | 0.1567   | 0.2039   | 0.3796   | 0.396478 |
| Gm7589        | chr9:59145673-59146210    | 1.0117   | 1.0291   | 0.0247   | 0.959419 |
| Coro2b        | chr9:62419491-62537044    | 0.0969   | 0.0740   | -0.3879  | 0.543018 |
| Myzap         | chr9:71504346-71592360    | 0.1200   | 0.0688   | -0.8031  | 0.145512 |
| Gm16353       | chr9:75132958-75134181    | 0.3228   | 0.1931   | -0.7413  | 0.324735 |
| Mei4          | chr9:81863669-82206007    | 0.1171   | 0.1515   | 0.3716   | 0.489637 |
| Gm24004       | chr9:95934612-95934790    | 3.3234   | 3.7026   | 0.1559   | 0.670062 |
| Trf           | chr9:103204000-103230444  | 0.1575   | 0.2390   | 0.6015   | 0.321978 |
| 4930500F10Rik | chr9:106247959-106248907  | 1.0656   | 0.7417   | -0.5226  | 0.349297 |
| Gm17040       | chr9:107292434-107297192  | 0.4443   | 0.3029   | -0.5530  | 0.225647 |
| Camp          | chr9:109847374-109849456  | 0.6735   | 0.9886   | 0.5538   | 0.641866 |
| Arpp21        | chr9:112065090-112235938  | 0.0460   | 0.0319   | -0.5256  | 0.520825 |
| Itga9         | chr9:118606689-118901003  | 0.1135   | 0.0621   | -0.8712  | 0.069453 |
| Acvr2b        | chr9:119402443-119433501  | 0.2620   | 0.1793   | -0.5473  | 0.374744 |
| Gm2449        | chr9:119892702-119894863  | 0.6385   | 0.4066   | -0.6512  | 0.423478 |
| Tmem158       | chr9:123259057-123260789  | 0.2376   | 0.2224   | -0.0955  | 0.819042 |
| Lars2         | chr9:123366939-123462664  | 5.2584   | 26.9279  | 2.3564   | 0.352407 |
| Usp27x        | chrX:7371275-7375830      | 0.1781   | 0.1407   | -0.3401  | 0.459426 |
| B630019K06Rik | chrX:8892381-8894963      | 0.2239   | 0.3135   | 0.4853   | 0.240425 |
| Gm4984        | chrX:12651882-12652821    | 0.6646   | 0.4150   | -0.6796  | 0.185462 |
| Gm14719       | chrX:49660959-49661190    | 2.1584   | 2.0609   | -0.0667  | 0.893186 |
| 3830403N18Rik | chrX:56136571-56153498    | 0.5725   | 0.0001   | -12.4830 | 0.203003 |
| Gm14817       | chrX:73795214-73797616    | 0.8081   | 1.1770   | 0.5426   | 0.520060 |
| Mir5132       | chrX:74023527-74023598    | 8.4840   | 9.6334   | 0.1833   | 0.823364 |
| Rpl3-ps2      | chrX:74170652-74171866    | 0.4232   | 0.3029   | -0.4824  | 0.337163 |
| Gm14686       | chrX:74261031-74261374    | 1.9286   | 1.6502   | -0.2249  | 0.432013 |
| Gm14830       | chrX:94774977-94775677    | 0.8183   | 0.5778   | -0.5020  | 0.298323 |
| Gm9670        | chrX:103506811-103507589  | 1.0062   | 1.5251   | 0.6000   | 0.088098 |
| Slc16a2       | chrX:103697413-103821965  | 0.0665   | 0.2392   | 1.8470   | 0.142394 |
| Gm14984       | chrX:130400956-130402219  | 0.4305   | 0.5838   | 0.4396   | 0.451808 |
| Gm8019        | chrX:137099515-137100102  | 0.5904   | 0.9006   | 0.6090   | 0.173890 |
| Gm6382        | chrX:142210883-142211825  | 0.6642   | 0.5581   | -0.2511  | 0.555792 |
| Gm15032       | chrX:142622491-142622902  | 1.0491   | 0.9344   | -0.1670  | 0.658396 |
| NA            | chrX:145601810-145602301  | 1.2792   | 1.1477   | -0.1565  | 0.653419 |
| Gm5946        | chrX:150220715-150226021  | 0.1988   | 0.2436   | 0.2931   | 0.556176 |
| Gm15152       | chrX:151005869-151006528  | 0.9697   | 1.1683   | 0.2689   | 0.612339 |
| Arhgap6       | chrX:168795098-169304435  | 0.0492   | 0.0420   | -0.2273  | 0.596664 |
| Ctnnd2        | chr15:30172592-31029311   | 0.0526   | 0.1555   | 1.5628   | 0.033940 |
| Gm25628       | chr15:64025947-64026052   | 4.9792   | 4.0276   | 0.3060   | 0.546166 |
| Gm17271       | chr15:76797627-76798029   | 0.7338   | 0.3213   | -1.1915  | 0.240883 |
| Tst           | chr15:78399555-78405859   | 0.5720   | 0.4383   | -0.3840  | 0.341864 |
| C1qtnf6       | chr15:78523345-78529625   | 0.3012   | 0.2508   | -0.2639  | 0.623432 |
| Syng1         | chr15:80091333-80119501   | 0.1482   | 0.0385   | -1.9463  | 0.095574 |
| Gm22067       | chr15:81592092-81592199   | 6.9794   | 4.1118   | -0.7633  | 0.017226 |
| Shisa8        | chr15:82206951-82212815   | 0.2479   | 0.1636   | -0.6001  | 0.243915 |
| Cyp2d26       | chr15:82790106-82794245   | 0.2086   | 0.1688   | -0.3059  | 0.697727 |
| Rnu12         | chr15:83149643-83149794   | 5.0834   | 3.1112   | -0.7083  | 0.269107 |
| Gm15722       | chr15:86087639-86090060   | 1.1832   | 0.9489   | -0.3184  | 0.639442 |
| Rabl2         | chr15:89582532-89591923   | 0.1918   | 0.1363   | -0.4928  | 0.277561 |
| Wnt10b        | chr15:98771752-98778150   | 0.1626   | 0.1255   | -0.3732  | 0.497970 |
| Gm9763        | chr15:99898286-99898556   | 1.3429   | 1.6289   | 0.2785   | 0.568787 |
| A330009N23Rik | chr15:101221195-101224121 | 0.4394   | 0.4596   | 0.0651   | 0.924758 |
| Gm2237        | chr14:19563800-19585135   | 0.2757   | 0.3960   | 0.5226   | 0.477868 |
| Gm6158        | chr14:24070073-24070637   | 0.9454   | 1.1717   | 0.3096   | 0.434349 |
| Gm2178        | chr14:26514553-26514910   | 1.8751   | 1.2361   | -0.6012  | 0.344134 |
| Gm6043        | chr14:29217638-29218130   | 1.2716   | 1.3422   | 0.0779   | 0.904238 |
| Gm10916       | chr14:50769247-50769730   | 1.4439   | 0.8789   | -0.7163  | 0.255840 |
| Trav6-2       | chr14:52667410-52667864   | 2.0711   | 1.6683   | -0.3121  | 0.527526 |
| Trav6d-5      | chr14:52795027-52795631   | 1.4161   | 1.0830   | -0.3868  | 0.248975 |
| Trav13d-4     | chr14:53073003-53073267   | 2.0594   | 1.0509   | -0.9706  | 0.089463 |
| Trav4-2       | chr14:53418348-53418872   | 0.8949   | 0.8437   | -0.0850  | 0.897868 |
| Trav3-4       | chr14:53776955-53777575   | 1.0813   | 1.1166   | 0.0464   | 0.915672 |
| Traj57        | chr14:54158504-54158569   | 6.1546   | 8.4598   | 0.4589   | 0.445800 |
| Traj46        | chr14:54172335-54172398   | 10.9575  | 9.5653   | -0.1960  | 0.611748 |
| Gm20726       | chr14:54632328-54632781   | 1.9232   | 1.1307   | -0.7663  | 0.014866 |
| Nedd8         | chr14:55662264-55671906   | 113.6950 | 113.9835 | 0.0037   | 0.984181 |
| Parp4         | chr14:56575618-56659794   | 11.8413  | 12.6690  | 0.0975   | 0.684769 |

|               |                           |          |          |         |          |
|---------------|---------------------------|----------|----------|---------|----------|
| Gm9013        | chr14:60039609-60040491   | 1.0145   | 0.5605   | -0.8559 | 0.100087 |
| Blk           | chr14:63372836-63417187   | 0.0861   | 0.1642   | 0.9321  | 0.425143 |
| Gm20667       | chr14:67673176-67675106   | 0.3577   | 0.2931   | -0.2871 | 0.598447 |
| 5031414D18Rik | chr14:75016026-75052532   | 0.1413   | 0.1510   | 0.0962  | 0.899918 |
| Spry2         | chr14:105891948-105896819 | 0.3229   | 0.3519   | 0.1238  | 0.816831 |
| Mir17         | chr14:115043670-115043754 | 6.3060   | 1.9875   | -1.6658 | 0.003189 |
| Mir20a        | chr14:115044156-115044263 | 6.5869   | 6.5235   | -0.0139 | 0.977102 |
| Cldn20        | chr17:3532553-3533213     | 0.7768   | 1.0926   | 0.4921  | 0.505948 |
| Dynlt1a       | chr17:6310546-6317474     | 0.6896   | 0.9126   | 0.4041  | 0.309471 |
| Prr18         | chr17:8340405-8344112     | 0.2013   | 0.1141   | -0.8189 | 0.151753 |
| Mas1          | chr17:12841078-12868143   | 0.1453   | 0.2787   | 0.9400  | 0.205705 |
| Zfp229        | chr17:21730794-21769342   | 0.1760   | 0.0916   | -0.9418 | 0.060374 |
| Zscan10       | chr17:23600855-23611019   | 0.1372   | 0.0817   | -0.7471 | 0.419485 |
| 2810468N07Rik | chr17:25570810-25575043   | 0.4385   | 0.4782   | 0.1248  | 0.771328 |
| Gm8186        | chr17:26098871-26099257   | 2.3173   | 1.3605   | -0.7683 | 0.146233 |
| Gm20468       | chr17:26861442-26897886   | 1.0651   | 0.6483   | -0.7162 | 0.437948 |
| 4930526A20Rik | chr17:28075049-28076677   | 0.3231   | 0.2151   | -0.5873 | 0.214909 |
| Pdxx-ps       | chr17:32076082-32100286   | 0.2501   | 0.2956   | 0.2407  | 0.684179 |
| Gm23111       | chr17:33959662-33959767   | 4.2476   | 4.5153   | 0.0882  | 0.865463 |
| Gm26940       | chr17:34024965-34025070   | 4.3535   | 2.1156   | -1.0411 | 0.244365 |
| Mir219a-1     | chr17:34024982-34025092   | 6.5113   | 2.8384   | -1.1979 | 0.042017 |
| H2-Pa         | chr17:34084671-34085823   | 1.0046   | 0.8785   | -0.1935 | 0.618579 |
| H2-DMb1       | chr17:34153071-34160223   | 0.4009   | 0.4180   | 0.0602  | 0.881260 |
| Gm20506       | chr17:34249056-34250264   | 1.2677   | 0.9928   | -0.3526 | 0.357887 |
| Sapcd1        | chr17:35025958-35028016   | 0.4864   | 0.5540   | 0.1877  | 0.745877 |
| Gm20508       | chr17:35991866-35993738   | 0.3281   | 0.1870   | -0.8114 | 0.706060 |
| Yam1          | chr17:39846957-39848788   | 346.8270 | 757.9303 | 1.1278  | 0.334158 |
| Tmem151b      | chr17:45541939-45549677   | 0.0812   | 0.0613   | -0.4045 | 0.650871 |
| Gnmt          | chr17:46725663-46729168   | 0.4264   | 0.3617   | -0.2372 | 0.690434 |
| Frs3          | chr17:47689029-47704286   | 0.1543   | 0.1511   | -0.0299 | 0.950825 |
| Acsbg2        | chr17:56843102-56874447   | 0.1144   | 0.0346   | -1.7237 | 0.194140 |
| Gm17168       | chr17:57041774-57047143   | 0.6633   | 0.2107   | -1.6546 | 0.247542 |
| Gm17228       | chr17:63346919-63347410   | 1.5228   | 1.1969   | -0.3474 | 0.460582 |
| Gm17538       | chr17:77674375-77674702   | 1.4341   | 1.0699   | -0.4226 | 0.595761 |
| Prm1          | chr16:10796325-10796886   | 1.3552   | 1.3332   | -0.0236 | 0.921218 |
| Gm4262        | chr16:11008897-11015186   | 0.2823   | 0.2290   | -0.3014 | 0.558665 |
| Gm24145       | chr16:11167104-11167267   | 2.4909   | 2.6813   | 0.1063  | 0.893234 |
| Gm6305        | chr16:11190253-11191265   | 0.7046   | 0.6534   | -0.1090 | 0.802985 |
| Vpreb1        | chr16:16868401-16870843   | 0.4034   | 0.3122   | -0.3699 | 0.372474 |
| Rpl26-ps4     | chr16:17711667-17712105   | 1.0521   | 1.8403   | 0.8067  | 0.078116 |
| Gm15954       | chr16:18069213-18070362   | 1.5195   | 1.4394   | -0.0782 | 0.854480 |
| Gm15798       | chr16:18944257-18944665   | 1.1257   | 1.2950   | 0.2022  | 0.594453 |
| Iglv1         | chr16:19085016-19085460   | 0.7987   | 0.3687   | -1.1151 | 0.568948 |
| Snord66       | chr16:20684238-20684313   | 10.9163  | 6.1081   | -0.8377 | 0.067631 |
| Dgkg          | chr16:22468460-22657221   | 0.1051   | 0.0830   | -0.3405 | 0.553364 |
| Gm15746       | chr16:23197094-23198121   | 0.5181   | 0.5185   | 0.0013  | 0.998671 |
| Slc12a8       | chr16:33517327-33664135   | 0.1253   | 0.1569   | 0.3246  | 0.478559 |
| Gm15564       | chr16:35966751-35983230   | 6.4728   | 63.1325  | 3.2859  | 0.337196 |
| B4galt4       | chr16:38742263-38769049   | 0.2120   | 0.2335   | 0.1392  | 0.790217 |
| Cd200r3       | chr16:44943677-44981380   | 0.0827   | 0.1203   | 0.5402  | 0.275440 |
| Tagln3        | chr16:45711229-45724608   | 0.3567   | 0.1782   | -1.0013 | 0.081458 |
| NA            | chr16:49913192-49915008   | 12.7822  | 17.9364  | 0.4888  | 0.244718 |
| Rps19-ps12    | chr16:79914459-79914889   | 1.1574   | 0.8529   | -0.4405 | 0.500126 |
| 4932438H23Rik | chr16:91053934-91095122   | 0.2274   | 0.2244   | -0.0193 | 0.949560 |
| Lca5l         | chr16:96158406-96192257   | 0.0472   | 0.0933   | 0.9831  | 0.228303 |
| Gm960         | chr19:4625840-4698668     | 0.1671   | 0.2035   | 0.2842  | 0.508404 |
| Tigd3         | chr19:5891138-5894107     | 0.4264   | 0.2347   | -0.8615 | 0.085015 |
| Flrt1         | chr19:7092013-7105729     | 0.0885   | 0.0965   | 0.1256  | 0.846516 |
| Best1         | chr19:9985173-10001633    | 0.2671   | 0.2769   | 0.0519  | 0.945432 |
| Slc15a3       | chr19:10839726-10859362   | 0.0671   | 0.0606   | -0.1471 | 0.795307 |
| Tmem132a      | chr19:10857821-10869940   | 0.0895   | 0.0808   | -0.1486 | 0.744054 |
| Gm10136       | chr19:29003404-29003842   | 1.2305   | 1.2993   | 0.0784  | 0.890719 |
| Cpeb3         | chr19:37021290-37208601   | 0.0841   | 0.0936   | 0.1545  | 0.655923 |
| Cyp26c1       | chr19:37685580-37693398   | 0.3855   | 0.3250   | -0.2464 | 0.273463 |
| Scd3          | chr19:44203287-44244016   | 0.1762   | 0.1123   | -0.6503 | 0.321880 |
| Pdzd7         | chr19:45026905-45046614   | 0.1337   | 0.1416   | 0.0830  | 0.887089 |
| Kazald1       | chr19:45075240-45079289   | 0.3560   | 0.2173   | -0.7121 | 0.013263 |
| Gm24724       | chr19:53159756-53159863   | 4.6562   | 1.8651   | -1.3199 | 0.039527 |
| Nrap          | chr19:56320034-56390037   | 0.0481   | 0.0672   | 0.4832  | 0.515905 |
| Gm6104        | chr1:4879201-4880669      | 0.3007   | 0.2484   | -0.2758 | 0.613000 |
| Gm16103       | chr1:43785909-43787188    | 0.5384   | 0.3438   | -0.6470 | 0.119965 |

|               |                          |         |         |         |          |
|---------------|--------------------------|---------|---------|---------|----------|
| 2310016D23Rik | chr1:60778842-60803790   | 1.3311  | 0.9924  | -0.4237 | 0.136553 |
| 4933402D24Rik | chr1:63754906-63769267   | 0.2931  | 0.2312  | -0.3422 | 0.391907 |
| Gm8812        | chr1:66062964-66063376   | 1.0845  | 0.7101  | -0.6110 | 0.293349 |
| Rpl31-ps14    | chr1:66948562-66948940   | 1.3209  | 1.2131  | -0.1229 | 0.801313 |
| Gpbar1        | chr1:74278549-74279624   | 0.4797  | 0.4773  | -0.0072 | 0.989885 |
| A530032D15Rik | chr1:85083068-85109853   | 0.3996  | 0.2421  | -0.7227 | 0.270242 |
| Gm16341       | chr1:86275508-86301375   | 1.8882  | 1.7930  | -0.0746 | 0.850039 |
| Gm24148       | chr1:86352007-86352087   | 7.6792  | 6.8369  | -0.1676 | 0.714372 |
| Gm22549       | chr1:87341454-87341561   | 5.8405  | 6.3786  | 0.1272  | 0.745237 |
| Gm17415       | chr1:93421681-93422488   | 0.8115  | 0.6290  | -0.3674 | 0.427078 |
| Faim3         | chr1:130865668-130880790 | 0.2677  | 0.4642  | 0.7945  | 0.459904 |
| Gm26280       | chr1:135150665-135150766 | 4.4137  | 3.6042  | -0.2923 | 0.501479 |
| Tdrd5         | chr1:156255295-156303664 | 0.0826  | 0.0316  | -1.3885 | 0.027841 |
| Serpinc1      | chr1:160978605-161003010 | 0.3355  | 0.3077  | -0.1247 | 0.840925 |
| Tnfsf18       | chr1:161494654-161505290 | 0.2076  | 0.1437  | -0.5307 | 0.414448 |
| Gm15429       | chr1:161725535-161727682 | 0.3291  | 0.1630  | -1.0141 | 0.002851 |
| Dnm3          | chr1:161982452-162478034 | 0.0365  | 0.0124  | -1.5536 | 0.025998 |
| Gm6345        | chr1:170254048-170255739 | 0.2555  | 0.1195  | -1.0960 | 0.040285 |
| 1700009P17Rik | chr1:171113917-171126967 | 0.4364  | 0.3228  | -0.4351 | 0.341354 |
| 4930532G15Rik | chr1:185359460-185362865 | 0.8070  | 0.8905  | 0.1420  | 0.715874 |
| 9630028B13Rik | chr1:185429356-185441819 | 0.1896  | 0.1852  | -0.0342 | 0.943888 |
| Ankrd29       | chr18:12252361-12305720  | 0.1149  | 0.2653  | 1.2076  | 0.136595 |
| Gm7847        | chr18:25823580-25824357  | 0.5348  | 0.4195  | -0.3504 | 0.541121 |
| Gm22200       | chr18:34941233-34941300  | 11.3179 | 9.2694  | -0.2881 | 0.279414 |
| NA            | chr18:35309119-35309221  | 5.5222  | 3.0803  | -0.8422 | 0.236487 |
| Cystm1        | chr18:36345618-36402980  | 0.1575  | 0.2335  | 0.5683  | 0.348013 |
| Spry4         | chr18:38586267-38601268  | 0.1296  | 0.0637  | -1.0232 | 0.100464 |
| Gm15334       | chr18:38993634-38994192  | 1.3909  | 1.9549  | 0.4911  | 0.389965 |
| Cd63-ps       | chr18:50134725-50135600  | 0.4776  | 0.2941  | -0.6995 | 0.501045 |
| Tex43         | chr18:56588349-56594782  | 0.4652  | 0.3804  | -0.2905 | 0.676492 |
| Gm26403       | chr18:61138508-61138613  | 5.3641  | 4.7282  | -0.1820 | 0.660679 |
| Pde6a         | chr18:61220481-61289924  | 0.1223  | 0.1621  | 0.4070  | 0.449772 |
| Gm22567       | chr18:65427468-65427810  | 1.9407  | 1.8690  | -0.0543 | 0.915272 |
| Stard6        | chr18:70472453-70501066  | 0.2957  | 0.3610  | 0.2883  | 0.653555 |
| Gm8807        | chr18:75182217-75182709  | 0.5055  | 0.4777  | -0.0815 | 0.934279 |
| Katnal2       | chr18:76977147-77047308  | 0.0598  | 0.0361  | -0.7273 | 0.514162 |
| Itih2         | chr2:10094592-10131396   | 0.1729  | 0.1494  | -0.2102 | 0.508865 |
| Gm13375       | chr2:20969053-20969997   | 0.4107  | 0.6886  | 0.7456  | 0.092028 |
| Enkur         | chr2:21180730-21205365   | 0.2924  | 0.5901  | 1.0130  | 0.075050 |
| Rnf208        | chr2:25242254-25244262   | 0.2280  | 0.2303  | 0.0147  | 0.977698 |
| Sardhos       | chr2:27189381-27234710   | 1.1237  | 0.6165  | -0.8662 | 0.292425 |
| Barhl1        | chr2:28907678-28916668   | 0.2109  | 0.1508  | -0.4838 | 0.221661 |
| Gm14486       | chr2:30658467-30678011   | 0.5664  | 0.4601  | -0.2999 | 0.563115 |
| Gm13405       | chr2:31209469-31211347   | 1.0476  | 0.8499  | -0.3018 | 0.496835 |
| Lcn2          | chr2:32384632-32387797   | 0.1388  | 0.2502  | 0.8497  | 0.603232 |
| Pip5kl1       | chr2:32574796-32583782   | 0.2587  | 0.2571  | -0.0085 | 0.967328 |
| Ak1           | chr2:32621757-32646805   | 0.2263  | 0.2093  | -0.1130 | 0.768590 |
| Gm13529       | chr2:33652388-33652798   | 1.4328  | 1.1033  | -0.3770 | 0.617730 |
| Ggta1         | chr2:35400178-35463231   | 13.7638 | 11.6679 | -0.2383 | 0.267117 |
| Gm16523       | chr2:39161250-39161989   | 0.9689  | 1.2693  | 0.3897  | 0.442965 |
| Gm13511       | chr2:39216931-39217294   | 1.0328  | 1.1158  | 0.1115  | 0.877639 |
| Gm13453       | chr2:40127503-40127860   | 1.6916  | 0.8731  | -0.9542 | 0.052840 |
| Gm13535       | chr2:57272563-57275686   | 0.2633  | 0.1848  | -0.5107 | 0.359260 |
| Gm13620       | chr2:60125095-60125819   | 1.4099  | 1.2209  | -0.2076 | 0.517402 |
| Gm25966       | chr2:61798179-61798296   | 4.3788  | 3.4755  | -0.3333 | 0.527176 |
| Gm13565       | chr2:62436879-62441142   | 0.9974  | 0.8416  | -0.2450 | 0.548660 |
| Klhl23        | chr2:69821943-69836651   | 0.1623  | 0.0929  | -0.8050 | 0.054514 |
| Gm13641       | chr2:71319782-71320255   | 1.3610  | 1.4652  | 0.1065  | 0.771402 |
| Gm13642       | chr2:71412530-71412917   | 1.7006  | 1.1335  | -0.5852 | 0.096592 |
| Gm13665       | chr2:73116747-73117275   | 0.8937  | 0.5208  | -0.7790 | 0.309944 |
| Gm13666       | chr2:73131744-73132543   | 0.8232  | 0.7600  | -0.1153 | 0.770379 |
| C1qtnf4       | chr2:90885859-90890525   | 0.4433  | 0.5286  | 0.2540  | 0.661087 |
| Spi1          | chr2:91082389-91115756   | 0.2113  | 0.1565  | -0.4334 | 0.458240 |
| Gm13868       | chr2:102311913-102312207 | 2.4934  | 1.9202  | -0.3768 | 0.486769 |
| Gm22676       | chr2:112500868-112500997 | 2.8201  | 3.1282  | 0.1496  | 0.816287 |
| Casc5         | chr2:119047118-119105501 | 1.9475  | 2.4313  | 0.3201  | 0.549487 |
| Sptbn5        | chr2:120046156-120085772 | 0.0599  | 0.0482  | -0.3127 | 0.303968 |
| Map1a         | chr2:121289599-121310832 | 0.0530  | 0.0558  | 0.0739  | 0.811092 |
| Patl2         | chr2:122120107-122186189 | 0.2119  | 0.1053  | -1.0082 | 0.223302 |
| AA467197      | chr2:122636985-122641191 | 0.6481  | 0.3824  | -0.7609 | 0.274466 |
| NA            | chr2:127269708-127270032 | 1.2496  | 1.2962  | 0.0528  | 0.937555 |

|               |                          |        |         |         |          |
|---------------|--------------------------|--------|---------|---------|----------|
| Gm14024       | chr2:129246375-129268526 | 0.6627 | 0.8850  | 0.4174  | 0.561389 |
| Spcs2-ps      | chr2:129378270-129379396 | 1.0014 | 0.4812  | -1.0574 | 0.064250 |
| Gm14057       | chr2:130803500-130803982 | 0.8965 | 0.7153  | -0.3257 | 0.590893 |
| Hspa12b       | chr2:131127279-131146321 | 0.1535 | 0.1587  | 0.0480  | 0.906880 |
| Macro2d       | chr2:140395308-142392966 | 0.0369 | 0.0572  | 0.6345  | 0.188872 |
| 4930444E06Rik | chr2:144243240-144244849 | 0.3621 | 0.3983  | 0.1376  | 0.649519 |
| Gm11701       | chr2:144364126-144365627 | 0.4752 | 0.5448  | 0.1973  | 0.652163 |
| Gm14122       | chr2:150398255-150399399 | 0.6474 | 0.6204  | -0.0615 | 0.864272 |
| Sox12         | chr2:152393610-152398063 | 0.1652 | 0.1484  | -0.1552 | 0.804298 |
| Hck           | chr2:153108467-153151441 | 0.2151 | 0.3338  | 0.6338  | 0.106020 |
| Necab3        | chr2:154544398-154558890 | 0.2797 | 0.1792  | -0.6418 | 0.189162 |
| Src           | chr2:157418443-157471862 | 0.0884 | 0.0706  | -0.3244 | 0.642818 |
| 2410019O14Rik | chr2:157595582-157597320 | 1.2618 | 0.7595  | -0.7323 | 0.416803 |
| Gm26003       | chr2:158358359-158358472 | 8.5596 | 3.7385  | -1.1951 | 0.014950 |
| Lpin3         | chr2:160880669-160906002 | 0.1542 | 0.1489  | -0.0504 | 0.885135 |
| Gm14302       | chr2:164459895-164460955 | 1.5576 | 1.6257  | 0.0618  | 0.751735 |
| Gm22596       | chr2:164761658-164761974 | 1.7030 | 1.9724  | 0.2119  | 0.486674 |
| Mmp9          | chr2:164940779-164955850 | 0.1454 | 0.1928  | 0.4076  | 0.573716 |
| Gm25265       | chr2:166682073-166682420 | 2.2991 | 1.4936  | -0.6222 | 0.148542 |
| Gm14443       | chr2:175166254-175175871 | 0.1478 | 0.1401  | -0.0776 | 0.909474 |
| Stmn3         | chr2:181306458-181314500 | 0.4810 | 0.4025  | -0.2573 | 0.574449 |
| mt-Ti         | chrM:3705-3774           | 7.0184 | 11.0907 | 0.6601  | 0.297885 |
| mt-Tw         | chrM:4949-5016           | 9.6319 | 9.5591  | -0.0109 | 0.985547 |
| mt-Tg         | chrM:9390-9458           | 6.0468 | 8.0674  | 0.4159  | 0.479152 |
| mt-Nd3        | chrM:9458-9806           | 1.6351 | 1.5765  | -0.0527 | 0.921589 |
| Gm15466       | chr3:8882237-8882570     | 1.9154 | 1.7017  | -0.1706 | 0.621248 |
| C030034L19Rik | chr3:9403063-9437233     | 0.0572 | 0.0566  | -0.0134 | 0.982551 |
| Gm7488        | chr3:21049444-21050525   | 0.4117 | 0.5617  | 0.4483  | 0.561336 |
| Lrrc34        | chr3:30624266-30647869   | 0.2702 | 0.3519  | 0.3810  | 0.545851 |
| Rpl21-ps10    | chr3:38107439-38107922   | 1.0209 | 1.5429  | 0.5958  | 0.202580 |
| Igsf10        | chr3:59316734-59344256   | 0.0513 | 0.0748  | 0.5423  | 0.296762 |
| P2ry1         | chr3:61002794-61008979   | 0.1018 | 0.0955  | -0.0931 | 0.889900 |
| Lekr1         | chr3:65666227-65831159   | 0.0902 | 0.0747  | -0.2708 | 0.626965 |
| Rarres1       | chr3:67478885-67515523   | 0.5083 | 0.3644  | -0.4803 | 0.089746 |
| NA            | chr3:75396867-75451818   | 0.5626 | 0.2827  | -0.9926 | 0.159730 |
| Fhdcl         | chr3:84444034-84480429   | 0.1555 | 0.0497  | -1.6440 | 0.012236 |
| Mir1905       | chr3:88536300-88536382   | 4.3789 | 4.7414  | 0.1148  | 0.886842 |
| Pklr          | chr3:89136141-89146784   | 0.1023 | 0.1768  | 0.7893  | 0.168772 |
| 1700040D17Rik | chr3:94409394-94412883   | 0.6657 | 0.2859  | -1.2193 | 0.063890 |
| Ctsk          | chr3:95499285-95509362   | 0.4056 | 0.2219  | -0.8702 | 0.024359 |
| Gm22581       | chr3:96724264-96724400   | 5.8538 | 3.2367  | -0.8549 | 0.053858 |
| M6pr-ps       | chr3:99500023-99502645   | 0.2947 | 0.1809  | -0.7042 | 0.135975 |
| Chil3         | chr3:106147553-106167564 | 0.2547 | 0.5348  | 1.0706  | 0.471573 |
| Sypl2         | chr3:108211471-108226648 | 0.1649 | 0.1560  | -0.0802 | 0.805758 |
| Gm17494       | chr3:122257090-122293547 | 0.4183 | 0.5515  | 0.3986  | 0.492862 |
| Rpsa-ps10     | chr3:150072589-150073620 | 0.6000 | 0.5142  | -0.2227 | 0.624885 |
| Gm26895       | chr4:11980668-11988471   | 1.0275 | 0.2969  | -1.7912 | 0.037971 |
| Gm11869       | chr4:15969571-15969928   | 1.7145 | 2.0578  | 0.2633  | 0.435250 |
| Gm11865       | chr4:16246268-16249514   | 0.5392 | 0.5550  | 0.0418  | 0.874406 |
| Klh132        | chr4:24612553-24851124   | 0.0530 | 0.0543  | 0.0336  | 0.954036 |
| Gm12403       | chr4:41168645-41169604   | 0.6369 | 0.6902  | 0.1160  | 0.849629 |
| n-R5s183      | chr4:41303157-41303272   | 6.5106 | 2.8602  | -1.1867 | 0.034424 |
| Fam219aos     | chr4:41517436-41518929   | 0.9585 | 0.6972  | -0.4591 | 0.326580 |
| Tmem8b        | chr4:43668970-43692668   | 0.0908 | 0.1182  | 0.3804  | 0.438478 |
| Gm23250       | chr4:46118179-46118446   | 1.4818 | 0.9579  | -0.6294 | 0.136764 |
| Gm12444       | chr4:46243013-46243890   | 0.5333 | 1.0658  | 0.9988  | 0.010729 |
| Gm12516       | chr4:55392316-55392701   | 2.1279 | 0.9644  | -1.1418 | 0.074012 |
| Gm12538       | chr4:57413710-57414196   | 1.1664 | 0.9393  | -0.3123 | 0.635554 |
| Gm12543       | chr4:59833676-59834219   | 0.7023 | 0.7696  | 0.1320  | 0.805883 |
| Gm12542       | chr4:59889985-59894924   | 0.7998 | 0.4497  | -0.8308 | 0.148918 |
| Rnf183        | chr4:62427539-62435252   | 0.3087 | 0.3645  | 0.2398  | 0.770333 |
| 4933430I17Rik | chr4:62525368-62547993   | 0.3007 | 0.2252  | -0.4172 | 0.383141 |
| Gm11249       | chr4:67930880-67931739   | 0.6573 | 0.3590  | -0.8725 | 0.263684 |
| Gm11221       | chr4:69691977-69692574   | 0.9665 | 1.2251  | 0.3421  | 0.426046 |
| Rps18-ps1     | chr4:71370737-71371196   | 1.0570 | 0.6418  | -0.7198 | 0.113588 |
| Gm11263       | chr4:79327707-79328456   | 0.9016 | 0.9227  | 0.0334  | 0.945251 |
| Jun           | chr4:95049033-95052222   | 1.9155 | 7.5568  | 1.9801  | 0.270753 |
| Junos         | chr4:95051533-95167318   | 0.2373 | 0.5088  | 1.1003  | 0.369767 |
| Ldlrad1       | chr4:107209179-107218060 | 0.3984 | 0.4034  | 0.0182  | 0.966027 |
| Echdc2        | chr4:108165436-108179308 | 0.1804 | 0.1126  | -0.6796 | 0.070661 |
| Gm25827       | chr4:108521923-108522030 | 6.1741 | 5.7785  | -0.0955 | 0.857449 |



|                      |                           |         |         |         |          |
|----------------------|---------------------------|---------|---------|---------|----------|
| <i>Ttc39a</i>        | chr4:109406622-109444745  | 0.0921  | 0.1448  | 0.6524  | 0.184145 |
| <i>Tex38</i>         | chr4:115779833-115781018  | 0.6209  | 0.9180  | 0.5641  | 0.118288 |
| <i>Hpd1</i>          | chr4:116819906-116821508  | 0.4547  | 0.3428  | -0.4073 | 0.339334 |
| <i>Ldha-ps2</i>      | chr4:119334388-119335445  | 0.5661  | 0.4651  | -0.2836 | 0.528478 |
| <i>Gm12900</i>       | chr4:123274899-123275472  | 0.7503  | 0.6423  | -0.2242 | 0.785952 |
| <i>D130007C19Rik</i> | chr4:123902128-123903634  | 0.4639  | 0.4505  | -0.0420 | 0.911011 |
| <i>Gm12903</i>       | chr4:123902421-123902965  | 0.5474  | 0.6448  | 0.2362  | 0.712682 |
| <i>Gm25323</i>       | chr4:126201174-126201277  | 7.0555  | 5.3294  | -0.4048 | 0.142127 |
| <i>Gm12929</i>       | chr4:126476301-126476671  | 1.1136  | 0.5447  | -1.0318 | 0.067257 |
| <i>Gm12944</i>       | chr4:127056261-127056724  | 1.1735  | 1.3046  | 0.1528  | 0.668370 |
| <i>Gm25600</i>       | chr4:127108465-127108571  | 5.0169  | 2.2192  | -1.1768 | 0.054411 |
| <i>Gm12978</i>       | chr4:131902789-131903311  | 0.7326  | 0.5989  | -0.2907 | 0.522093 |
| <i>Gm13033</i>       | chr4:132884544-132886626  | 0.3948  | 0.5550  | 0.4916  | 0.371626 |
| <i>Gm24636</i>       | chr4:133171426-133171714  | 2.1743  | 2.0379  | -0.0935 | 0.701137 |
| <i>Gm16225</i>       | chr4:135118220-135120447  | 1.9844  | 1.9780  | -0.0047 | 0.994161 |
| <i>Gm12988</i>       | chr4:135756217-135756695  | 1.0680  | 0.2682  | -1.9936 | 0.065154 |
| <i>Lactb1</i>        | chr4:136622620-136638110  | 0.2382  | 0.1600  | -0.5743 | 0.347940 |
| <i>C1qa</i>          | chr4:136895916-136898803  | 0.2344  | 0.1428  | -0.7148 | 0.562381 |
| <i>Gm25772</i>       | chr4:137325558-137325614  | 11.9264 | 12.1636 | 0.0284  | 0.945309 |
| <i>Alpl</i>          | chr4:137741732-137796384  | 0.1707  | 0.1099  | -0.6351 | 0.426665 |
| <i>1700095J12Rik</i> | chr4:138137594-138138518  | 0.9395  | 0.8512  | -0.1423 | 0.820172 |
| <i>Padi3</i>         | chr4:140785364-140810648  | 0.1068  | 0.0369  | -1.5323 | 0.095631 |
| <i>Cela2a</i>        | chr4:141814961-141826160  | 0.3082  | 0.2347  | -0.3929 | 0.478240 |
| <i>Ctrc</i>          | chr4:141814961-141846359  | 0.3841  | 0.2832  | -0.4398 | 0.411792 |
| <i>Gm15951</i>       | chr4:147520467-147520867  | 1.3478  | 1.4758  | 0.1309  | 0.819199 |
| <i>Gm13054</i>       | chr4:148001090-148004014  | 0.4437  | 0.7688  | 0.7929  | 0.284176 |
| <i>Gm572</i>         | chr4:148643316-148671572  | 0.2710  | 0.1854  | -0.5479 | 0.442377 |
| <i>Gm13071</i>       | chr4:149500632-149501008  | 0.9643  | 1.1194  | 0.2150  | 0.604601 |
| <i>Gm13070</i>       | chr4:149904005-149908149  | 0.8475  | 0.9950  | 0.2314  | 0.668414 |
| <i>Gpr157</i>        | chr4:150087364-150105927  | 0.1170  | 0.1618  | 0.4677  | 0.496074 |
| <i>Gm16024</i>       | chr4:155616408-155616787  | 3.2220  | 3.1970  | -0.0112 | 0.983376 |
| <i>Gm13648</i>       | chr4:156052714-156059802  | 0.4526  | 0.3538  | -0.3553 | 0.508422 |
| <i>Txlnb</i>         | chr10:17796225-17845665   | 0.0990  | 0.1501  | 0.6005  | 0.169233 |
| <i>Nodal</i>         | chr10:61417971-61425338   | 0.2642  | 0.3411  | 0.3689  | 0.478217 |
| <i>Gm5778</i>        | chr10:73201694-73202766   | 0.6559  | 0.5110  | -0.3601 | 0.353213 |
| <i>Gm17151</i>       | chr10:80766858-80768987   | 2.4354  | 0.9949  | -1.2916 | 0.069555 |
| <i>Tle6</i>          | chr10:81590903-81601073   | 0.1647  | 0.1435  | -0.1992 | 0.591633 |
| <i>Gm15910</i>       | chr10:120857628-120863326 | 0.1736  | 0.0994  | -0.8040 | 0.439041 |
| <i>Ndufa4l2</i>      | chr10:127514938-127517152 | 0.3741  | 0.2286  | -0.7106 | 0.458593 |
| <i>Myo1a</i>         | chr10:127705169-127720887 | 0.1327  | 0.0815  | -0.7029 | 0.319934 |
| <i>Gm26393</i>       | chr11:3656662-3656791     | 5.7031  | 2.7154  | -1.0706 | 0.117038 |
| <i>Slc35e4</i>       | chr11:3907020-3914664     | 0.1756  | 0.2197  | 0.3233  | 0.528313 |
| <i>Gm11977</i>       | chr11:6781677-6783138     | 0.4725  | 0.3370  | -0.4876 | 0.460100 |
| <i>Gm12058</i>       | chr11:22786810-22787247   | 0.9764  | 0.4205  | -1.2155 | 0.085988 |
| <i>Acyp2</i>         | chr11:30505990-30649587   | 0.8792  | 0.5322  | -0.7242 | 0.254649 |
| <i>Gm12165</i>       | chr11:46036439-46036781   | 1.7398  | 0.9114  | -0.9328 | 0.115702 |
| <i>Gm12174</i>       | chr11:46727817-46728630   | 0.6568  | 0.3622  | -0.8586 | 0.097414 |
| <i>Gm12275</i>       | chr11:62304863-62305170   | 1.5167  | 1.0191  | -0.5736 | 0.319843 |
| <i>Gucy2e</i>        | chr11:69218116-69237036   | 0.0798  | 0.0619  | -0.3654 | 0.474795 |
| <i>Wscd1</i>         | chr11:71749919-71789647   | 0.1363  | 0.0213  | -2.6752 | 0.012832 |
| <i>Gm22772</i>       | chr11:77052946-77053067   | 2.9592  | 3.3345  | 0.1723  | 0.773251 |
| <i>Gm12346</i>       | chr11:77293443-77295898   | 0.2846  | 0.2836  | -0.0050 | 0.990887 |
| <i>Gm12571</i>       | chr11:78149195-78149438   | 2.0499  | 2.5495  | 0.3147  | 0.369061 |
| <i>Omg</i>           | chr11:79500981-79504084   | 0.2910  | 0.3104  | 0.0930  | 0.857988 |
| <i>Cct6b</i>         | chr11:82719249-82764321   | 0.3484  | 0.3146  | -0.1474 | 0.658600 |
| <i>Gm11439</i>       | chr11:85095140-85095549   | 1.3201  | 1.7360  | 0.3951  | 0.440344 |
| <i>B4galnt2</i>      | chr11:95865942-95914891   | 0.4743  | 0.3373  | -0.4917 | 0.392513 |
| <i>Gm26316</i>       | chr11:101604849-101605040 | 3.4761  | 0.6664  | -2.3831 | 0.011341 |
| <i>Wipi1</i>         | chr11:109573330-109611967 | 0.1113  | 0.0915  | -0.2832 | 0.380027 |
| <i>Kcnj16</i>        | chr11:110968032-111027968 | 0.1341  | 0.1255  | -0.0953 | 0.900599 |
| <i>Gm11694</i>       | chr11:115493023-115493182 | 3.4375  | 3.1016  | -0.1484 | 0.691860 |
| <i>Gm11703</i>       | chr11:115724325-115724808 | 1.0610  | 1.0629  | 0.0026  | 0.993112 |
| <i>Rps11-ps2</i>     | chr11:116382749-116383205 | 1.2970  | 1.1319  | -0.1965 | 0.707195 |
| <i>Aanat</i>         | chr11:116586431-116597680 | 0.2023  | 0.2218  | 0.1329  | 0.814991 |
| <i>Snord1b</i>       | chr11:116674147-116674222 | 4.9838  | 5.3823  | 0.1110  | 0.853775 |
| <i>Snord1a</i>       | chr11:116674597-116674671 | 5.5509  | 3.0404  | -0.8684 | 0.438594 |
| <i>Mir1932</i>       | chr11:119390471-119390561 | 4.3294  | 4.9089  | 0.1812  | 0.788586 |
| <i>Pde6g</i>         | chr11:120447604-120453500 | 0.3103  | 0.0940  | -1.7226 | 0.011101 |
| <i>Rac3</i>          | chr11:120721469-120723969 | 0.5269  | 0.2418  | -1.1240 | 0.112874 |
| <i>Gm22748</i>       | chr12:17546145-17546281   | 5.1884  | 4.6980  | -0.1433 | 0.667988 |
| <i>Agmo</i>          | chr12:37241640-37582202   | 0.0281  | 0.0089  | -1.6640 | 0.525871 |

|                      |                           |        |        |         |          |
|----------------------|---------------------------|--------|--------|---------|----------|
| <i>Rpl31-ps17</i>    | chr12:54701328-54701706   | 1.4463 | 1.3439 | -0.1059 | 0.846754 |
| <i>Gm23394</i>       | chr12:55821062-55821153   | 7.2880 | 5.0728 | -0.5227 | 0.474047 |
| <i>Gm5786</i>        | chr12:59081018-59081900   | 0.7657 | 0.7018 | -0.1257 | 0.727623 |
| <i>Gm16572</i>       | chr12:81587798-81589640   | 2.4611 | 1.7608 | -0.4831 | 0.343306 |
| <i>Gm16570</i>       | chr12:81589434-81589870   | 1.2973 | 0.9154 | -0.5030 | 0.426226 |
| <i>Rpl31-ps1</i>     | chr12:91890895-91891273   | 1.2866 | 0.7285 | -0.8206 | 0.180245 |
| <i>Gm10433</i>       | chr12:100187967-100193540 | 0.2438 | 0.3453 | 0.5019  | 0.472214 |
| <i>Gm15995</i>       | chr12:111726391-111727127 | 0.7964 | 1.1794 | 0.5665  | 0.409234 |
| <i>BC022687</i>      | chr12:112808974-112816245 | 0.3059 | 0.4311 | 0.4948  | 0.226235 |
| <i>Ighv3-6</i>       | chr12:114288156-114288582 | 0.8683 | 0.2113 | -2.0386 | 0.353564 |
| <i>Gm23084</i>       | chr13:3648536-3648650     | 4.4254 | 3.7244 | -0.2488 | 0.772581 |
| <i>Gm26601</i>       | chr13:9387138-9391741     | 0.1635 | 0.1284 | -0.3487 | 0.600015 |
| <i>Vdac3-ps1</i>     | chr13:18030323-18031629   | 0.3318 | 0.2937 | -0.1761 | 0.741513 |
| <i>Tcrg-V6</i>       | chr13:19190367-19190929   | 1.0370 | 0.4072 | -1.3486 | 0.084011 |
| <i>Zfp184</i>        | chr13:21945093-21960779   | 0.1272 | 0.0729 | -0.8033 | 0.343838 |
| <i>Hist1h2ad</i>     | chr13:23574380-23574952   | 1.7431 | 0.6488 | -1.4257 | 0.156276 |
| <i>Gm11353</i>       | chr13:26492513-26493219   | 0.9481 | 0.6201 | -0.6126 | 0.425867 |
| <i>F13a1</i>         | chr13:36867177-37050244   | 0.1585 | 0.1864 | 0.2340  | 0.387719 |
| <i>Mir23b</i>        | chr13:63300471-63300568   | 7.1101 | 6.4224 | -0.1468 | 0.742360 |
| <i>Gm6910</i>        | chr13:66007671-66009240   | 0.3041 | 0.1059 | -1.5216 | 0.021103 |
| <i>A230107N01Rik</i> | chr13:84219580-84222175   | 0.2395 | 0.1723 | -0.4750 | 0.523685 |
| <i>3830408C21Rik</i> | chr13:107031962-107033673 | 0.3735 | 0.3339 | -0.1617 | 0.752594 |
| <i>Plk2</i>          | chr13:110395043-110400844 | 0.1983 | 0.0857 | -1.2105 | 0.117993 |
| <i>Ccl28</i>         | chr13:119623818-119654354 | 0.1473 | 0.1074 | -0.4558 | 0.386623 |
| <i>Magi2</i>         | chr5:20702276-20706049    | 0.5678 | 0.6004 | 0.0806  | 0.901482 |
| <i>Gm15421</i>       | chr5:22528320-22528719    | 1.7955 | 1.3346 | -0.4280 | 0.430515 |
| <i>4632411P08Rik</i> | chr5:29378698-29390488    | 0.1194 | 0.1429 | 0.2600  | 0.685559 |
| <i>Gm15796</i>       | chr5:38507462-38507666    | 4.0290 | 2.8671 | -0.4908 | 0.282329 |
| <i>Klb</i>           | chr5:65348385-65384003    | 0.1989 | 0.0473 | -2.0737 | 0.031621 |
| <i>Snora26</i>       | chr5:74093529-74093650    | 6.7674 | 2.3886 | -1.5024 | 0.079322 |
| <i>Gm24524</i>       | chr5:86079765-86079935    | 3.8382 | 3.3456 | -0.1982 | 0.485488 |
| <i>Eif5a3-ps</i>     | chr5:90132228-90132675    | 1.3152 | 1.1507 | -0.1927 | 0.435857 |
| <i>Ppof2</i>         | chr5:92226973-92253159    | 0.2421 | 0.1592 | -0.6048 | 0.410989 |
| <i>Hpse</i>          | chr5:100679483-100719716  | 0.1572 | 0.2084 | 0.4069  | 0.100385 |
| <i>Pitpnm2os2</i>    | chr5:124194906-124200346  | 0.4073 | 0.2999 | -0.4413 | 0.342994 |
| <i>Gm23171</i>       | chr5:124257762-124258026  | 1.8222 | 2.2298 | 0.2913  | 0.380236 |
| <i>Gm15920</i>       | chr5:130188394-130188796  | 1.2140 | 1.3309 | 0.1326  | 0.765940 |
| <i>Gm24139</i>       | chr5:134204468-134204756  | 2.2014 | 2.4252 | 0.1397  | 0.700447 |
| <i>Gm16061</i>       | chr5:135698162-135699019  | 0.6462 | 0.4894 | -0.4009 | 0.331571 |
| <i>Cldn15</i>        | chr5:136966615-136975858  | 0.2426 | 0.3005 | 0.3086  | 0.493352 |
| <i>Mir93</i>         | chr5:138165522-138165610  | 5.6673 | 6.4586 | 0.1885  | 0.693195 |
| <i>Kpna7</i>         | chr5:144983518-145084030  | 0.1926 | 0.1927 | 0.0006  | 0.998681 |
| <i>Gm13858</i>       | chr6:34379466-34380445    | 0.5351 | 0.6485 | 0.2774  | 0.774175 |
| <i>Gm25108</i>       | chr6:42275649-42275727    | 5.3218 | 4.0020 | -0.4112 | 0.499166 |
| <i>Fam221a</i>       | chr6:49367738-49389905    | 0.2559 | 0.2405 | -0.0896 | 0.880978 |
| <i>Hoxa2</i>         | chr6:52162350-52165413    | 0.0733 | 0.0902 | 0.3004  | 0.845340 |
| <i>Gm17147</i>       | chr6:65128570-65129002    | 0.7736 | 0.5083 | -0.6059 | 0.494796 |
| <i>Tcf7l1</i>        | chr6:72626377-72789254    | 0.1158 | 0.0754 | -0.6204 | 0.525577 |
| <i>Slc4a5</i>        | chr6:83219827-83304945    | 0.1127 | 0.1259 | 0.1601  | 0.822701 |
| <i>Gm9769</i>        | chr6:85843868-85845372    | 0.2566 | 0.1713 | -0.5829 | 0.507345 |
| <i>Cml2</i>          | chr6:85865421-85869158    | 0.0486 | 0.0449 | -0.1146 | 0.949144 |
| <i>Rpl21-ps12</i>    | chr6:90844977-90845460    | 0.6054 | 0.8328 | 0.4600  | 0.499278 |
| <i>Gm26175</i>       | chr6:97162816-97162947    | 4.3014 | 3.3414 | -0.3644 | 0.552991 |
| <i>Gm15531</i>       | chr6:97890287-97890539    | 3.5907 | 1.2270 | -1.5491 | 0.074452 |
| <i>Gm20404</i>       | chr6:116107650-116127493  | 0.9378 | 0.8827 | -0.0873 | 0.912494 |
| <i>Gm8213</i>        | chr6:116195417-116195858  | 1.8634 | 0.8272 | -1.1715 | 0.106904 |
| <i>NA</i>            | chr6:125494423-125509135  | 0.6910 | 0.3557 | -0.9579 | 0.070728 |
| <i>Gm4968</i>        | chr6:127233755-127234619  | 0.6292 | 0.4007 | -0.6509 | 0.384159 |
| <i>Smco3</i>         | chr6:136829926-136835452  | 0.2826 | 0.3660 | 0.3734  | 0.532491 |
| <i>Sox5os3</i>       | chr6:144672867-144693834  | 0.4963 | 0.3655 | -0.4412 | 0.511628 |
| <i>Tnni3</i>         | chr7:4518304-4524229      | 0.2348 | 0.4617 | 0.9752  | 0.251434 |
| <i>Dnaaf3</i>        | chr7:4522932-4532453      | 0.1689 | 0.3234 | 0.9366  | 0.111387 |
| <i>Smim17</i>        | chr7:6398714-6432093      | 0.1009 | 0.0495 | -1.0272 | 0.188231 |
| <i>Gm4879</i>        | chr7:13178902-13180174    | 0.5911 | 0.4177 | -0.5010 | 0.105454 |
| <i>Ap1p1</i>         | chr7:30434980-30445582    | 0.2830 | 0.2979 | 0.0739  | 0.919057 |
| <i>Zfp536</i>        | chr7:37472134-37773641    | 0.1508 | 0.0069 | -4.4600 | 0.062228 |
| <i>Gm20449</i>       | chr7:41399377-41499417    | 0.2142 | 0.1482 | -0.5316 | 0.159327 |
| <i>Klk10</i>         | chr7:43781053-43785410    | 0.2586 | 0.5432 | 1.0704  | 0.059777 |
| <i>Art1</i>          | chr7:102101742-102111148  | 0.4275 | 0.1915 | -1.1585 | 0.055201 |
| <i>Acsm4</i>         | chr7:119690025-119714567  | 0.3264 | 0.1775 | -0.8787 | 0.085675 |
| <i>4933427G17Rik</i> | chr7:120982508-121014787  | 0.2620 | 0.1611 | -0.7017 | 0.362894 |

|               |                           |         |        |         |          |
|---------------|---------------------------|---------|--------|---------|----------|
| Gm16326       | chr7:122131091-122131505  | 1.2882  | 0.7501 | -0.7801 | 0.333196 |
| Gm14388       | chr7:122442022-122442499  | 0.9758  | 0.8905 | -0.1319 | 0.816141 |
| Ifitm1        | chr7:140967220-140969825  | 0.4695  | 0.2020 | -1.2168 | 0.093030 |
| Gm7290        | chr7:142757255-142757852  | 0.7640  | 0.4633 | -0.7217 | 0.383993 |
| Gm24698       | chr8:13876096-13876226    | 2.5338  | 2.6673 | 0.0741  | 0.911040 |
| Nek5          | chr8:22073615-22125053    | 0.1556  | 0.1133 | -0.4569 | 0.535491 |
| Snord13       | chr8:31149863-31149967    | 6.0423  | 4.7255 | -0.3546 | 0.622027 |
| Gm5117        | chr8:31737053-31739763    | 0.2225  | 0.1404 | -0.6645 | 0.347596 |
| Csgalnact1    | chr8:68356780-68735146    | 0.0930  | 0.0613 | -0.6018 | 0.359834 |
| Mef2b         | chr8:70152777-70167488    | 0.5124  | 0.5189 | 0.0180  | 0.948604 |
| Mir23a        | chr8:84208517-84208592    | 6.0082  | 1.9705 | -1.6084 | 0.036918 |
| Gm10094       | chr8:95825353-95826133    | 0.6925  | 0.1861 | -1.8957 | 0.187933 |
| Snord71       | chr8:109839294-109839379  | 7.0074  | 2.5555 | -1.4553 | 0.062331 |
| Mtss1l        | chr8:110721475-110741400  | 0.1301  | 0.0858 | -0.6008 | 0.172374 |
| Dock6         | chr9:21800183-21852635    | 0.1374  | 0.0781 | -0.8155 | 0.169481 |
| Gm25630       | chr9:35474884-35475046    | 2.2198  | 3.0532 | 0.4599  | 0.482670 |
| Gm10080       | chr9:44374594-44375209    | 0.8005  | 0.8934 | 0.1584  | 0.701643 |
| 4930550C14Rik | chr9:53405285-53432803    | 0.2755  | 0.3842 | 0.4801  | 0.423872 |
| Gm23344       | chr9:64175047-64175115    | 12.9389 | 4.8261 | -1.4228 | 0.058611 |
| Gm25313       | chr9:65196571-65196687    | 4.5757  | 3.1338 | -0.5461 | 0.502758 |
| Gm20509       | chr9:73103728-73117920    | 1.2821  | 1.2243 | -0.0666 | 0.894218 |
| n-R5s87       | chr9:96549593-96549709    | 4.7635  | 2.3565 | -1.0154 | 0.191474 |
| Mir135a-1     | chr9:106154123-106154213  | 6.4909  | 6.8766 | 0.0833  | 0.875853 |
| Xylb          | chr9:119357380-119393797  | 0.1274  | 0.1425 | 0.1618  | 0.586176 |
| Slc6a20a      | chr9:123636121-123678885  | 0.1083  | 0.0732 | -0.5642 | 0.540401 |
| Gm14450       | chrX:5984771-5985011      | 2.7233  | 2.2643 | -0.2663 | 0.623133 |
| Gm6787        | chrX:8097086-8106701      | 0.3900  | 0.3013 | -0.3724 | 0.463772 |
| Gm9435        | chrX:14955097-14955974    | 0.3546  | 0.0837 | -2.0834 | 0.150554 |
| Apln          | chrX:48025145-48034853    | 0.2623  | 0.1563 | -0.7473 | 0.120745 |
| Rab33a        | chrX:48519284-48530232    | 0.5466  | 0.3299 | -0.7286 | 0.118728 |
| Mtap7d3       | chrX:56797857-56822326    | 0.1689  | 0.2081 | 0.3009  | 0.582853 |
| Cd40lg        | chrX:57212142-57224042    | 0.3224  | 0.1629 | -0.9845 | 0.323761 |
| Hspa9-ps1     | chrX:60576945-60578878    | 0.3871  | 0.1878 | -1.0433 | 0.276712 |
| Gm7327        | chrX:61785380-61786032    | 1.1215  | 0.7857 | -0.5133 | 0.276014 |
| Gm15379       | chrX:75458811-75459459    | 0.4384  | 1.0025 | 1.1932  | 0.227940 |
| Gm7429        | chrX:114980969-114981317  | 1.2460  | 1.0604 | -0.2328 | 0.653238 |
| Gprasp2       | chrX:135839033-135844730  | 0.1718  | 0.1167 | -0.5580 | 0.302303 |
| Gm5763        | chrX:142631482-142634015  | 0.2918  | 0.1227 | -1.2493 | 0.170101 |
| Gm15267       | chrX:152043048-152043512  | 1.1206  | 0.6711 | -0.7396 | 0.231414 |
| Gm15239       | chrX:167361454-167364421  | 0.8656  | 0.7373 | -0.2314 | 0.713811 |
| Lifr          | chr15:7129558-7197489     | 0.0491  | 0.0534 | 0.1203  | 0.846371 |
| Gm25713       | chr15:12158332-12158441   | 6.1573  | 6.2149 | 0.0134  | 0.956128 |
| Gm3362        | chr15:37943326-37943792   | 1.0540  | 1.0610 | 0.0096  | 0.986313 |
| Abra          | chr15:41865292-41869720   | 0.3044  | 0.3939 | 0.3722  | 0.428445 |
| Mir30b        | chr15:68337414-68337510   | 3.0406  | 0.7527 | -2.0143 | 0.388343 |
| Gm17189       | chr15:74784064-74800640   | 0.2599  | 0.2666 | 0.0370  | 0.972106 |
| n-R5s40       | chr15:79692501-79692625   | 5.1546  | 4.6074 | -0.1619 | 0.707002 |
| Gm24011       | chr15:86149583-86149851   | 1.1452  | 0.8133 | -0.4937 | 0.624092 |
| Gpd1          | chr15:99717514-99725005   | 0.1685  | 0.1922 | 0.1902  | 0.757576 |
| Il17rd        | chr14:27039000-27107286   | 0.0670  | 0.0711 | 0.0864  | 0.767998 |
| Gm24916       | chr14:31015147-31015226   | 7.3751  | 4.1814 | -0.8187 | 0.170729 |
| Trav8d-1      | chr14:52778446-52778994   | 1.2107  | 1.1920 | -0.0225 | 0.965401 |
| Trav12d-1     | chr14:52844464-52845039   | 1.1268  | 0.5870 | -0.9409 | 0.196978 |
| Trav7n-4      | chr14:53091345-53091875   | 1.1203  | 1.2851 | 0.1980  | 0.763780 |
| Trav13n-4     | chr14:53363835-53364102   | 2.6982  | 2.4013 | -0.1682 | 0.744767 |
| Trdv5         | chr14:54148661-54149201   | 1.8616  | 0.7383 | -1.3342 | 0.030264 |
| Traj58        | chr14:54157279-54157342   | 9.2305  | 6.9466 | -0.4101 | 0.536288 |
| Traj53        | chr14:54162643-54162709   | 7.8057  | 4.4059 | -0.8251 | 0.116773 |
| 1700039M10Rik | chr14:57571623-57572368   | 0.8872  | 0.7054 | -0.3308 | 0.489078 |
| Dleu7         | chr14:62276230-62292979   | 0.5681  | 0.3825 | -0.5706 | 0.195450 |
| Gm6984        | chr14:73953921-73955586   | 0.2487  | 0.1979 | -0.3301 | 0.442150 |
| Mir92-1       | chr14:115044426-115044506 | 5.6230  | 2.2763 | -1.3047 | 0.128253 |
| Slc15a1       | chr14:121459620-121505254 | 0.1798  | 0.2682 | 0.5769  | 0.190947 |
| T2            | chr17:8372395-8422728     | 0.2226  | 0.1859 | -0.2598 | 0.738348 |
| Pnlcd1        | chr17:12888901-12910000   | 0.4502  | 0.2841 | -0.6642 | 0.164700 |
| Zfp947        | chr17:22144358-22166190   | 0.1734  | 0.1730 | -0.0038 | 0.995208 |
| Gm16386       | chr17:22784797-22817741   | 0.4015  | 0.4477 | 0.1572  | 0.744337 |
| Casp16        | chr17:23550964-23553566   | 0.5883  | 0.3493 | -0.7522 | 0.220361 |
| Zfp13         | chr17:23575844-23599487   | 0.0997  | 0.0903 | -0.1442 | 0.878549 |
| Snord60       | chr17:24528475-24528553   | 7.1051  | 6.3075 | -0.1718 | 0.735555 |
| Gm17382       | chr17:26860286-26886175   | 0.3343  | 0.3119 | -0.1001 | 0.855538 |

|                      |                          |         |         |         |          |
|----------------------|--------------------------|---------|---------|---------|----------|
| <i>Slc26a8</i>       | chr17:28637782-28689987  | 0.1121  | 0.1500  | 0.4201  | 0.545262 |
| <i>Gm25447</i>       | chr17:31059603-31059731  | 3.9864  | 2.7327  | -0.5448 | 0.334803 |
| <i>NA</i>            | chr17:32285106-32285177  | 6.9187  | 11.3754 | 0.7173  | 0.124553 |
| <i>Gm23037</i>       | chr17:46403874-46404198  | 1.9119  | 2.2797  | 0.2539  | 0.643800 |
| <i>Plin5</i>         | chr17:56111600-56117596  | 0.2362  | 0.1561  | -0.5979 | 0.289044 |
| <i>Pspn</i>          | chr17:56999456-57000018  | 1.0970  | 1.2046  | 0.1350  | 0.828866 |
| <i>Snord92</i>       | chr17:71631280-71631365  | 8.3456  | 5.1049  | -0.7091 | 0.203207 |
| <i>Gm22858</i>       | chr17:71641583-71641659  | 10.2322 | 6.3155  | -0.6961 | 0.231133 |
| <i>Abcg8</i>         | chr17:84676301-84700333  | 0.1997  | 0.1222  | -0.7082 | 0.169388 |
| <i>Gm23493</i>       | chr16:3927199-3927287    | 5.3844  | 3.1196  | -0.7874 | 0.214244 |
| <i>Gm4279</i>        | chr16:11688168-11691857  | 0.1641  | 0.1895  | 0.2076  | 0.685952 |
| <i>Slc7a4</i>        | chr16:17572017-17576998  | 0.0926  | 0.0919  | -0.0107 | 0.983980 |
| <i>Gm7873</i>        | chr16:18218169-18219313  | 0.7457  | 0.8118  | 0.1225  | 0.795169 |
| <i>Gm25777</i>       | chr16:18240716-18240842  | 2.0843  | 1.3183  | -0.6608 | 0.589821 |
| <i>Igll2</i>         | chr16:19198400-19200351  | 0.6313  | 0.7329  | 0.2154  | 0.795481 |
| <i>Gm6467</i>        | chr16:21896505-21897116  | 1.0474  | 1.0480  | 0.0007  | 0.998032 |
| <i>Gm6493</i>        | chr16:23014207-23017038  | 0.2977  | 0.2241  | -0.4096 | 0.458913 |
| <i>Gm25617</i>       | chr16:38158007-38158139  | 3.5273  | 2.0705  | -0.7686 | 0.304078 |
| <i>Gm25989</i>       | chr16:43886681-43886814  | 3.3017  | 2.0751  | -0.6700 | 0.580355 |
| <i>Arl6</i>          | chr16:59612948-59639391  | 0.3697  | 0.3072  | -0.2673 | 0.504599 |
| <i>Rpl21-ps5</i>     | chr16:83371250-83371733  | 1.2630  | 1.4354  | 0.1846  | 0.675425 |
| <i>B3galt5</i>       | chr16:96235800-96319859  | 0.1068  | 0.1204  | 0.1735  | 0.810256 |
| <i>Lbhd1</i>         | chr19:8883929-8887258    | 0.9266  | 0.6919  | -0.4215 | 0.422812 |
| <i>Rpl31-ps20</i>    | chr19:30160619-30160997  | 1.8035  | 0.9314  | -0.9533 | 0.067103 |
| <i>Sfrp5</i>         | chr19:42197970-42202252  | 0.2310  | 0.1051  | -1.1359 | 0.147931 |
| <i>Gm6807</i>        | chr19:45450307-45451195  | 0.6081  | 0.3501  | -0.7964 | 0.105404 |
| <i>1500015O10Rik</i> | chr1:43730601-43742578   | 0.6381  | 0.6694  | 0.0690  | 0.908905 |
| <i>Gm5976</i>        | chr1:52503233-52504229   | 0.5967  | 0.6294  | 0.0769  | 0.900355 |
| <i>Als2cr12</i>      | chr1:58658116-58695989   | 0.4141  | 0.4328  | 0.0638  | 0.868521 |
| <i>Snord70</i>       | chr1:59691933-59692020   | 6.2549  | 2.9210  | -1.0986 | 0.221990 |
| <i>Rps27-ps1</i>     | chr1:63073773-63074019   | 1.7743  | 2.0563  | 0.2127  | 0.748269 |
| <i>Gm8805</i>        | chr1:65552681-65552994   | 0.8807  | 0.7580  | -0.2165 | 0.790212 |
| <i>Gm5528</i>        | chr1:72004287-72004770   | 0.9018  | 1.0251  | 0.1848  | 0.693287 |
| <i>A630095N17Rik</i> | chr1:75220094-75232093   | 0.5967  | 0.8039  | 0.4301  | 0.487688 |
| <i>n-R5s215</i>      | chr1:85674881-85674985   | 4.4737  | 6.3871  | 0.5137  | 0.333766 |
| <i>B3gnt7</i>        | chr1:86303220-86307303   | 0.1851  | 0.2537  | 0.4546  | 0.363719 |
| <i>Sctr</i>          | chr1:120006979-120063528 | 0.1934  | 0.2009  | 0.0548  | 0.909397 |
| <i>Gm23734</i>       | chr1:127375130-127375239 | 4.8721  | 1.3473  | -1.8545 | 0.143211 |
| <i>Map3k19</i>       | chr1:127815270-127840290 | 0.1025  | 0.0829  | -0.3067 | 0.646434 |
| <i>Zp3r</i>          | chr1:130576712-130629621 | 0.2347  | 0.1220  | -0.9441 | 0.246434 |
| <i>Gm10535</i>       | chr1:135108960-135113378 | 0.5984  | 0.5601  | -0.0954 | 0.878264 |
| <i>Gm15850</i>       | chr1:136126177-136131183 | 0.3536  | 0.2873  | -0.2996 | 0.437463 |
| <i>Rgl1</i>          | chr1:152516758-152766351 | 0.1135  | 0.1312  | 0.2092  | 0.403504 |
| <i>3110045C21Rik</i> | chr1:169969408-169972395 | 0.3190  | 0.3076  | -0.0525 | 0.932789 |
| <i>Gm2962</i>        | chr1:170925308-170925644 | 0.8651  | 0.9208  | 0.0900  | 0.922978 |
| <i>Gm10516</i>       | chr1:192136897-192151013 | 0.2181  | 0.2609  | 0.2586  | 0.207218 |
| <i>Gm10557</i>       | chr18:4198215-4198969    | 1.1891  | 0.6782  | -0.8100 | 0.086225 |
| <i>Fhod3</i>         | chr18:24709444-25133500  | 0.0626  | 0.0509  | -0.2984 | 0.706670 |
| <i>Gm26109</i>       | chr18:34942643-34942713  | 5.2980  | 2.5963  | -1.0290 | 0.228315 |
| <i>BC023105</i>      | chr18:60441752-60442983  | 0.2727  | 0.1207  | -1.1764 | 0.309881 |
| <i>Spink10</i>       | chr18:62548910-62661366  | 0.2942  | 0.2435  | -0.2728 | 0.572997 |
| <i>Spire1</i>        | chr18:67488208-67552777  | 0.1174  | 0.1567  | 0.4159  | 0.270450 |
| <i>Snord58b</i>      | chr18:75001057-75001123  | 12.0804 | 5.8132  | -1.0553 | 0.066389 |
| <i>Rpl21-ps8</i>     | chr18:82523538-82524021  | 0.8930  | 0.5748  | -0.6354 | 0.437769 |
| <i>Gm13262</i>       | chr2:9906177-9914678     | 0.2827  | 0.3209  | 0.1829  | 0.770471 |
| <i>Gm22051</i>       | chr2:10506554-10506681   | 4.4916  | 1.4517  | -1.6295 | 0.003392 |
| <i>Gm13321</i>       | chr2:12421624-12422023   | 1.4937  | 1.0049  | -0.5719 | 0.336840 |
| <i>A930004D18Rik</i> | chr2:18025192-18037737   | 0.1383  | 0.0760  | -0.8633 | 0.200088 |
| <i>NA</i>            | chr2:26014594-26014747   | 4.0357  | 3.3878  | -0.2525 | 0.736194 |
| <i>2600006K01Rik</i> | chr2:29868725-29869785   | 0.8603  | 0.5908  | -0.5422 | 0.215495 |
| <i>Gm13407</i>       | chr2:34412987-34413347   | 1.5838  | 1.6799  | 0.0849  | 0.865124 |
| <i>Gm13408</i>       | chr2:34564998-34565796   | 0.8770  | 0.7780  | -0.1727 | 0.577135 |
| <i>NA</i>            | chr2:34778676-34778772   | 5.6730  | 5.3628  | -0.0811 | 0.828948 |
| <i>Gm13496</i>       | chr2:38996712-38998258   | 0.2445  | 0.5194  | 1.0870  | 0.080398 |
| <i>Gm13517</i>       | chr2:55775547-55777042   | 0.3580  | 0.2807  | -0.3512 | 0.253351 |
| <i>Gm13573</i>       | chr2:60274943-60275574   | 0.8902  | 0.7817  | -0.1875 | 0.696885 |
| <i>Fap</i>           | chr2:62500942-62574075   | 0.1006  | 0.1092  | 0.1186  | 0.850648 |
| <i>Gm13707</i>       | chr2:73421908-73429142   | 0.9215  | 1.0648  | 0.2084  | 0.461800 |
| <i>Exd1</i>          | chr2:119516504-119547627 | 0.1001  | 0.0549  | -0.8655 | 0.242555 |
| <i>Gm22865</i>       | chr2:121004088-121004301 | 1.2671  | 1.9037  | 0.5873  | 0.562895 |
| <i>Gm14018</i>       | chr2:121485431-121491512 | 1.0583  | 0.9296  | -0.1871 | 0.748482 |

|                      |                           |         |        |         |          |
|----------------------|---------------------------|---------|--------|---------|----------|
| <i>Snord110</i>      | chr2:130275505-130275573  | 4.2246  | 5.6284 | 0.4139  | 0.530826 |
| <i>Gm14068</i>       | chr2:140044491-140044704  | 3.1661  | 2.0623 | -0.6184 | 0.204729 |
| <i>Gm14139</i>       | chr2:150181754-150193279  | 0.2710  | 0.0423 | -2.6788 | 0.083077 |
| <i>Tmem74b</i>       | chr2:151702007-151712157  | 0.1642  | 0.1026 | -0.6782 | 0.362613 |
| <i>Gm14198</i>       | chr2:154630001-154632636  | 0.7272  | 0.6924 | -0.0707 | 0.870743 |
| <i>Gm14200</i>       | chr2:158468168-158468360  | 2.0656  | 1.6148 | -0.3552 | 0.590443 |
| <i>Gm14403</i>       | chr2:177498214-177509763  | 0.4705  | 0.3119 | -0.5933 | 0.346421 |
| <i>C330013J21Rik</i> | chr2:177903339-177925613  | 0.5690  | 0.8447 | 0.5701  | 0.448335 |
| <i>Srms</i>          | chr2:181205561-181213185  | 0.2216  | 0.2006 | -0.1431 | 0.778896 |
| <i>Lkaear1</i>       | chr2:181696792-181698442  | 0.4865  | 0.3234 | -0.5892 | 0.297780 |
| <i>mt-Tv</i>         | chrM:1024-1093            | 2.7432  | 4.2357 | 0.6267  | 0.532046 |
| <i>Gm8177</i>        | chr3:57135495-57136831    | 0.5643  | 0.3015 | -0.9040 | 0.009120 |
| <i>Rpl32-ps</i>      | chr3:69716985-69717393    | 1.7159  | 0.9899 | -0.7936 | 0.279004 |
| <i>Tmem144</i>       | chr3:79813147-79842662    | 0.2897  | 0.2596 | -0.1586 | 0.567667 |
| <i>Snord73a</i>      | chr3:86138790-86138858    | 10.6252 | 9.0508 | -0.2314 | 0.642568 |
| <i>Kirrel</i>        | chr3:87078592-87174747    | 0.0669  | 0.0659 | -0.0217 | 0.969625 |
| <i>Rpl31-ps11</i>    | chr3:94604407-94604784    | 0.9382  | 1.2639 | 0.4300  | 0.363969 |
| <i>Selenbp1</i>      | chr3:94933055-94944758    | 0.3000  | 0.3222 | 0.1030  | 0.778639 |
| <i>Gm26594</i>       | chr3:95855965-95861485    | 0.5615  | 0.4487 | -0.3236 | 0.643286 |
| <i>Gnat2</i>         | chr3:108092788-108101432  | 0.1759  | 0.1732 | -0.0221 | 0.976870 |
| <i>Mir302b</i>       | chr3:127545227-127545301  | 5.0145  | 3.9159 | -0.3568 | 0.639191 |
| <i>Gm16060</i>       | chr3:138828684-138829162  | 1.0763  | 0.9940 | -0.1148 | 0.836265 |
| <i>Fsbp</i>          | chr4:11579664-11587591    | 0.1606  | 0.1396 | -0.2021 | 0.726999 |
| <i>Gm22849</i>       | chr4:34683878-34684185    | 1.5583  | 1.1947 | -0.3833 | 0.603508 |
| <i>Gm23090</i>       | chr4:41213775-41213853    | 6.3124  | 5.8428 | -0.1115 | 0.871290 |
| <i>Rps15a-ps8</i>    | chr4:53791069-53791456    | 1.0802  | 0.9442 | -0.1942 | 0.739215 |
| <i>Gm11209</i>       | chr4:62627676-62633712    | 1.2295  | 0.2525 | -2.2838 | 0.017925 |
| <i>Rpl17-ps4</i>     | chr4:63895544-63896099    | 0.8191  | 0.7602 | -0.1077 | 0.826517 |
| <i>4930553M12Rik</i> | chr4:88867881-88868379    | 1.7168  | 0.9162 | -0.9059 | 0.318628 |
| <i>Gm12726</i>       | chr4:105578339-105578940  | 0.7476  | 0.6963 | -0.1026 | 0.864231 |
| <i>Gm12850</i>       | chr4:107270433-107270869  | 0.7830  | 0.6265 | -0.3217 | 0.625524 |
| <i>Gm22345</i>       | chr4:108537490-108537597  | 8.2747  | 4.6457 | -0.8328 | 0.115180 |
| <i>Gm23143</i>       | chr4:117202527-117202643  | 5.8862  | 4.2483 | -0.4704 | 0.518680 |
| <i>Gm12959</i>       | chr4:119553655-119554058  | 1.2240  | 0.9125 | -0.4236 | 0.549218 |
| <i>Gm26606</i>       | chr4:123898632-123904842  | 0.2954  | 0.2725 | -0.1165 | 0.811544 |
| <i>Gm12936</i>       | chr4:126584508-126584809  | 1.4478  | 1.0406 | -0.4764 | 0.343600 |
| <i>Kdf1</i>          | chr4:133518962-133530790  | 0.2780  | 0.1375 | -1.0152 | 0.108393 |
| <i>Gm15979</i>       | chr4:135430125-135430841  | 0.9837  | 1.2363 | 0.3297  | 0.299706 |
| <i>Gm13047</i>       | chr4:141084863-141085678  | 0.6431  | 0.3813 | -0.7541 | 0.273782 |
| <i>Gm13238</i>       | chr4:145837218-145837998  | 0.6202  | 0.3348 | -0.8894 | 0.348703 |
| <i>Rnf207</i>        | chr4:152307018-152318993  | 0.1166  | 0.1069 | -0.1254 | 0.570812 |
| <i>Gabrd</i>         | chr4:155384979-155398112  | 0.1060  | 0.1154 | 0.1233  | 0.935851 |
| <i>5830444B04Rik</i> | chr4:155398762-155421704  | 1.1763  | 0.6146 | -0.9367 | 0.640110 |
| <i>NA</i>            | chr4:155409189-155447944  | 1.4187  | 0.9461 | -0.5845 | 0.747968 |
| <i>Vwa1</i>          | chr4:155768148-155774698  | 0.1255  | 0.1573 | 0.3263  | 0.422902 |
| <i>Gm16074</i>       | chr10:3992370-3992814     | 1.1380  | 1.7021 | 0.5809  | 0.244743 |
| <i>Mir5104</i>       | chr10:7836380-7836474     | 5.2851  | 5.1021 | -0.0508 | 0.914849 |
| <i>Rsph4a</i>        | chr10:33905110-33916021   | 0.1151  | 0.1809 | 0.6523  | 0.378700 |
| <i>BC021785</i>      | chr10:39958060-39986646   | 0.1000  | 0.0760 | -0.3951 | 0.478492 |
| <i>Hcn2</i>          | chr10:79716633-79736108   | 0.1522  | 0.1557 | 0.0327  | 0.959006 |
| <i>Gm23582</i>       | chr11:21249421-21249560   | 4.2492  | 4.6357 | 0.1256  | 0.857727 |
| <i>Mup-ps22</i>      | chr11:55123694-55123937   | 3.0037  | 2.2887 | -0.3922 | 0.619530 |
| <i>Epn2</i>          | chr11:61517248-61579687   | 0.0754  | 0.0634 | -0.2516 | 0.714597 |
| <i>Ccr10</i>         | chr11:101172996-101175443 | 0.2292  | 0.0742 | -1.6280 | 0.256641 |
| <i>Gm11619</i>       | chr11:101353308-101353545 | 2.6400  | 2.0029 | -0.3985 | 0.382596 |
| <i>Gm25593</i>       | chr11:101353341-101353437 | 5.3262  | 3.8035 | -0.4858 | 0.354363 |
| <i>2810410L24Rik</i> | chr11:120185399-120189852 | 0.2176  | 0.1765 | -0.3017 | 0.537956 |
| <i>Mir1938</i>       | chr12:40222711-40222811   | 4.4780  | 3.2949 | -0.4426 | 0.399001 |
| <i>Gm1818</i>        | chr12:48554181-48559971   | 0.1325  | 0.1524 | 0.2021  | 0.777441 |
| <i>Gm22973</i>       | chr12:59040334-59040525   | 3.2390  | 3.2708 | 0.0141  | 0.970438 |
| <i>Papln</i>         | chr12:83763633-83792382   | 0.0761  | 0.0458 | -0.7318 | 0.330889 |
| <i>Bdkrb1</i>        | chr12:105603084-105605428 | 0.3156  | 0.2932 | -0.1060 | 0.810835 |
| <i>Ak7</i>           | chr12:105705981-105782447 | 0.1657  | 0.2044 | 0.3028  | 0.677133 |
| <i>2810029C07Rik</i> | chr12:111572320-111574402 | 0.2404  | 0.3767 | 0.6479  | 0.066507 |
| <i>Ighv9-3</i>       | chr12:114140691-114141122 | 0.7295  | 0.1536 | -2.2474 | 0.463721 |
| <i>Fam217a</i>       | chr13:34909963-34919992   | 0.2388  | 0.2454 | 0.0396  | 0.889880 |
| <i>Cd180</i>         | chr13:102693557-102739629 | 0.1080  | 0.1066 | -0.0187 | 0.972768 |
| <i>Tmbim7</i>        | chr5:3657003-3680325      | 0.1478  | 0.2147 | 0.5379  | 0.436549 |
| <i>Gm22333</i>       | chr5:24438485-24438586    | 4.4110  | 4.6999 | 0.0915  | 0.910810 |
| <i>Gm5129</i>        | chr5:29735636-29735936    | 2.1121  | 1.8235 | -0.2120 | 0.684712 |
| <i>Fgfr3</i>         | chr5:33721723-33737068    | 0.0777  | 0.0930 | 0.2588  | 0.570278 |

|               |                          |        |        |         |          |
|---------------|--------------------------|--------|--------|---------|----------|
| Gm25551       | chr5:37092257-37092360   | 4.7280 | 4.0690 | -0.2166 | 0.635692 |
| 2310040G07Rik | chr5:76928367-76947758   | 0.6105 | 0.5316 | -0.1996 | 0.766477 |
| Gm2199        | chr5:80900749-80901623   | 0.4395 | 0.4423 | 0.0091  | 0.988764 |
| Kat2b-ps      | chr5:93390601-93393091   | 0.1753 | 0.2059 | 0.2321  | 0.667552 |
| Styx11        | chr5:135747219-135778385 | 0.3925 | 0.3237 | -0.2781 | 0.579978 |
| Gm23995       | chr5:144774424-144774553 | 2.1006 | 1.2663 | -0.7303 | 0.520387 |
| Slc13a4       | chr6:35267956-35308131   | 0.0818 | 0.0684 | -0.2584 | 0.683839 |
| A930035D04Rik | chr6:47453775-47454320   | 1.0014 | 1.1180 | 0.1590  | 0.672171 |
| M1ap          | chr6:82946901-83030183   | 0.1967 | 0.1926 | -0.0311 | 0.957164 |
| Rps19-ps9     | chr6:87948463-87948877   | 1.0653 | 0.3993 | -1.4158 | 0.026116 |
| Il17rc        | chr6:113471426-113483140 | 0.1790 | 0.1513 | -0.2430 | 0.687582 |
| Gm4875        | chr6:117997206-117997992 | 0.5070 | 0.7416 | 0.5485  | 0.473194 |
| Apold1        | chr6:134982000-134986836 | 0.1752 | 0.2129 | 0.2817  | 0.723392 |
| Slc27a5       | chr7:12988345-12998192   | 0.2050 | 0.1270 | -0.6915 | 0.323634 |
| Hif3a         | chr7:17031506-17062427   | 0.0636 | 0.0524 | -0.2798 | 0.657002 |
| Gm6537        | chr7:28756173-28758965   | 0.4053 | 0.2096 | -0.9513 | 0.203584 |
| Gm10161       | chr7:75366054-75366264   | 2.3548 | 1.6508 | -0.5124 | 0.369792 |
| Homer2        | chr7:81600480-81706925   | 0.0380 | 0.0376 | -0.0125 | 0.980076 |
| Gm16938       | chr7:98177193-98185597   | 0.1321 | 0.1524 | 0.2063  | 0.608589 |
| Chrna10       | chr7:102111265-102116713 | 0.1385 | 0.0648 | -1.0949 | 0.331853 |
| Gm25636       | chr7:110023209-110023342 | 3.0211 | 3.9706 | 0.3943  | 0.495747 |
| Gm14389       | chr7:122484194-122484420 | 2.1222 | 1.2254 | -0.7924 | 0.272154 |
| Stk32c        | chr7:139103637-139213307 | 0.1687 | 0.3008 | 0.8343  | 0.387861 |
| Odf3          | chr7:140847804-140851018 | 0.2073 | 0.1154 | -0.8454 | 0.122512 |
| Plvap         | chr8:71497753-71511769   | 0.2464 | 0.3445 | 0.4836  | 0.376897 |
| Nanos3        | chr8:84173732-84176552   | 0.5004 | 0.5491 | 0.1339  | 0.818374 |
| 9430002A10Rik | chr8:88174559-88175028   | 0.9942 | 1.2552 | 0.3363  | 0.579474 |
| Gpr56         | chr8:94977108-95014208   | 0.1439 | 0.2023 | 0.4917  | 0.473664 |
| Rps13-ps4     | chr8:119602169-119602625 | 1.8560 | 1.1174 | -0.7321 | 0.188855 |
| Epor          | chr9:21958898-21963576   | 0.2755 | 0.2684 | -0.0375 | 0.941198 |
| Panx3         | chr9:37659901-37669222   | 0.1260 | 0.1379 | 0.1306  | 0.829280 |
| Tmprss13      | chr9:45319099-45347581   | 0.2063 | 0.2193 | 0.0882  | 0.889317 |
| Gm16073       | chr9:65838166-65838683   | 0.8279 | 0.7819 | -0.0823 | 0.892151 |
| Hmgn3         | chr9:83109947-83146685   | 0.2728 | 0.2502 | -0.1248 | 0.862747 |
| Prss50        | chr9:110857966-110864628 | 0.3471 | 0.2382 | -0.5435 | 0.119076 |
| Gm26975       | chr9:118404096-118406099 | 1.5271 | 1.8822 | 0.3017  | 0.380485 |
| Gm25341       | chr9:122812563-122812831 | 1.1092 | 1.0938 | -0.0203 | 0.979144 |
| Rpl22-ps1     | chrX:8038610-8038996     | 1.2498 | 0.9932 | -0.3316 | 0.501426 |
| Gm7153        | chrX:75723671-75724126   | 1.0517 | 1.4425 | 0.4559  | 0.452685 |
| Gm14858       | chrX:102252521-102365498 | 0.2649 | 0.3136 | 0.2430  | 0.684289 |
| Gm14857       | chrX:106281911-106285096 | 0.1231 | 0.0804 | -0.6143 | 0.243065 |
| Tmem35        | chrX:134295224-134305969 | 0.2345 | 0.1228 | -0.9334 | 0.240892 |
| Capsl         | chr15:9436027-9466035    | 0.5383 | 0.6367 | 0.2422  | 0.726877 |
| Gm6576        | chr15:27025385-27026207  | 0.6030 | 0.5774 | -0.0626 | 0.887718 |
| Mroh5         | chr15:73761409-73839699  | 0.0644 | 0.0745 | 0.2085  | 0.863815 |
| Tssk5         | chr15:76371957-76374938  | 0.3450 | 0.3257 | -0.0827 | 0.871369 |
| Enthd1        | chr15:80452339-80560470  | 0.1969 | 0.3532 | 0.8434  | 0.210058 |
| Gm17025       | chr15:81415559-81419188  | 0.6480 | 0.5941 | -0.1253 | 0.891472 |
| 1810021B22Rik | chr15:89071195-89075852  | 0.5224 | 0.5684 | 0.1219  | 0.824143 |
| 9930004E17Rik | chr14:26670009-26670507  | 1.3691 | 1.2972 | -0.0777 | 0.895711 |
| Trav13-4-dv7  | chr14:53757355-53757920  | 1.3031 | 0.8601 | -0.5994 | 0.341804 |
| 1700001G11Rik | chr14:66295333-66297129  | 0.6911 | 0.5531 | -0.3215 | 0.631237 |
| Zbtbd6        | chr14:79451834-79454816  | 0.1614 | 0.2328 | 0.5282  | 0.262200 |
| Tmem181b-ps   | chr17:6448039-6449571    | 0.7605 | 0.5650 | -0.4289 | 0.269811 |
| BC028777      | chr17:24208860-24221730  | 0.3624 | 0.5219 | 0.5263  | 0.277832 |
| Abca17        | chr17:24264258-24351029  | 0.1211 | 0.0522 | -1.2149 | 0.098369 |
| Fer           | chr17:63896017-64139494  | 0.1269 | 0.1261 | -0.0100 | 0.981199 |
| Morn2         | chr17:80290211-80297473  | 0.6917 | 0.5917 | -0.2253 | 0.754696 |
| Rpl39l        | chr16:10170225-10174911  | 0.4520 | 0.1581 | -1.5155 | 0.561811 |
| Myh11         | chr16:14194526-14291408  | 0.0670 | 0.0938 | 0.4850  | 0.156887 |
| Gm15646       | chr16:17139674-17140483  | 0.8813 | 0.6195 | -0.5086 | 0.228067 |
| Gm15760       | chr16:20545917-20546200  | 1.8438 | 1.4903 | -0.3071 | 0.372631 |
| NA            | chr16:20677316-20677395  | 6.2710 | 8.0708 | 0.3640  | 0.490274 |
| Tigit         | chr16:43648860-43664184  | 0.3734 | 0.5923 | 0.6656  | 0.435072 |
| Lrfn4         | chr19:4611784-4615667    | 0.1303 | 0.1701 | 0.3842  | 0.527061 |
| Gm9750        | chr19:9135156-9279175    | 0.2763 | 0.3241 | 0.2306  | 0.593330 |
| Gm8412        | chr19:27858057-27858497  | 0.7907 | 0.4183 | -0.9184 | 0.242337 |
| Gsto2         | chr19:47865544-47886324  | 0.1793 | 0.2356 | 0.3940  | 0.628927 |
| Gm7658        | chr1:21511869-21513127   | 0.5054 | 0.3311 | -0.6103 | 0.268252 |
| Vil1          | chr1:74409375-74435559   | 0.1696 | 0.1971 | 0.2166  | 0.679465 |
| Atp6v1g3      | chr1:138273737-138289460 | 0.2840 | 0.1922 | -0.5634 | 0.647294 |

|                      |                           |        |        |         |          |
|----------------------|---------------------------|--------|--------|---------|----------|
| <i>Scppdh</i>        | chr1:179668209-179687189  | 0.0695 | 0.0315 | -1.1392 | 0.213027 |
| <i>Mir194-1</i>      | chr1:185313318-185313385  | 6.2657 | 4.9404 | -0.3428 | 0.602327 |
| <i>Gm22005</i>       | chr2:3291377-3291518      | 2.7139 | 2.4533 | -0.1457 | 0.849850 |
| <i>Gm13194</i>       | chr2:4942173-4942484      | 1.7376 | 2.4556 | 0.4990  | 0.331037 |
| <i>Gm13192</i>       | chr2:4959542-4959752      | 2.7275 | 0.9443 | -1.5303 | 0.113281 |
| <i>Gm25753</i>       | chr2:10502390-10502511    | 3.4265 | 1.3798 | -1.3123 | 0.189790 |
| <i>Stxbp1</i>        | chr2:32787601-32847239    | 0.1166 | 0.0857 | -0.4439 | 0.583189 |
| <i>Gca</i>           | chr2:62664284-62694109    | 0.1089 | 0.1236 | 0.1824  | 0.786961 |
| <i>Gm13623</i>       | chr2:69766181-69766806    | 0.9755 | 0.4365 | -1.1601 | 0.062335 |
| <i>Dnmt3l-ps1</i>    | chr2:83744483-83745736    | 0.3585 | 0.6480 | 0.8540  | 0.232518 |
| <i>Il1a</i>          | chr2:129299609-129309972  | 0.2027 | 0.0909 | -1.1572 | 0.245103 |
| <i>Gm14231</i>       | chr2:156789809-156790403  | 1.0210 | 1.2680 | 0.3126  | 0.461397 |
| <i>NA</i>            | chr2:157133905-157133972  | 9.6753 | 9.3895 | -0.0432 | 0.932562 |
| <i>Gm11472</i>       | chr2:167087183-167087739  | 0.8084 | 0.7239 | -0.1592 | 0.765694 |
| <i>Gm11474</i>       | chr2:167535165-167535442  | 2.0523 | 2.2407 | 0.1267  | 0.576061 |
| <i>Gm21747</i>       | chr18:10781722-10785883   | 1.3081 | 1.1632 | -0.1693 | 0.816452 |
| <i>Prob1</i>         | chr18:35652166-35655187   | 0.1835 | 0.1768 | -0.0538 | 0.852929 |
| <i>Rps19-ps4</i>     | chr18:42252397-42252835   | 1.3549 | 1.1314 | -0.2601 | 0.603492 |
| <i>NA</i>            | chr18:50046739-50047152   | 1.4708 | 2.2978 | 0.6437  | 0.222046 |
| <i>Ctlf</i>          | chr18:75431223-75697696   | 0.0829 | 0.0981 | 0.2415  | 0.665383 |
| <i>mt-Tn</i>         | chrM:5088-5159            | 4.1039 | 8.6527 | 1.0762  | 0.291139 |
| <i>Ccdc144b</i>      | chr3:36007246-36053547    | 0.0895 | 0.0508 | -0.8169 | 0.198222 |
| <i>Fam160a1</i>      | chr3:85660060-85746266    | 0.0877 | 0.1124 | 0.3581  | 0.383788 |
| <i>Gm12485</i>       | chr3:100680264-100680555  | 2.3624 | 2.1510 | -0.1353 | 0.832130 |
| <i>Atg4a-ps</i>      | chr3:103644002-103646069  | 0.2596 | 0.4246 | 0.7102  | 0.150689 |
| <i>Sort1</i>         | chr3:108284090-108361511  | 0.0987 | 0.0759 | -0.3802 | 0.447546 |
| <i>Fnbp1l</i>        | chr3:122538718-122619667  | 0.0898 | 0.1084 | 0.2722  | 0.612237 |
| <i>Mir186</i>        | chr3:157544278-157544349  | 8.8269 | 3.3314 | -1.4058 | 0.061544 |
| <i>Spag8</i>         | chr4:43651334-43653594    | 0.2857 | 0.2530 | -0.1756 | 0.762173 |
| <i>Gm12430</i>       | chr4:47453631-47454953    | 0.4417 | 0.5805 | 0.3942  | 0.506427 |
| <i>Gm12470</i>       | chr4:53662295-53663344    | 0.3149 | 0.2634 | -0.2575 | 0.778937 |
| <i>Gm11211</i>       | chr4:62723515-62727537    | 1.2724 | 0.9243 | -0.4611 | 0.412231 |
| <i>Atg4c</i>         | chr4:99193933-99259787    | 0.1317 | 0.2307 | 0.8089  | 0.308601 |
| <i>Mir1957a</i>      | chr4:119129778-119129844  | 4.2821 | 0.5430 | -2.9792 | 0.119329 |
| <i>Gm12989</i>       | chr4:135715867-135716598  | 0.5696 | 0.3742 | -0.6060 | 0.287827 |
| <i>Gm13230</i>       | chr4:145446739-145450888  | 0.3394 | 0.1061 | -1.6780 | 0.093893 |
| <i>Gm26624</i>       | chr4:147136277-147457019  | 0.1171 | 0.0869 | -0.4301 | 0.341280 |
| <i>Trmt112-ps2</i>   | chr4:149457296-149457872  | 0.8836 | 0.8291 | -0.0918 | 0.763897 |
| <i>Gm13171</i>       | chr4:155502315-155502706  | 1.3127 | 0.9894 | -0.4080 | 0.569785 |
| <i>NA</i>            | chr4:156130512-156133415  | 0.1506 | 0.1131 | -0.4137 | 0.443939 |
| <i>Gm24726</i>       | chr10:7848360-7848481     | 2.7866 | 5.0295 | 0.8519  | 0.271110 |
| <i>4930432B10Rik</i> | chr10:11244789-11281221   | 0.1440 | 0.2184 | 0.6012  | 0.216208 |
| <i>Perp</i>          | chr10:18845070-18857073   | 0.2111 | 0.2041 | -0.0488 | 0.928241 |
| <i>Gm17230</i>       | chr10:20625634-20629576   | 0.0909 | 0.0234 | -1.9568 | 0.212307 |
| <i>n-R5s76</i>       | chr10:31317168-31317281   | 3.2801 | 3.0737 | -0.0938 | 0.906301 |
| <i>Rtkn2</i>         | chr10:67979569-68059740   | 0.0817 | 0.0997 | 0.2883  | 0.615527 |
| <i>Socs2</i>         | chr10:95385361-95417180   | 0.0541 | 0.0634 | 0.2304  | 0.717910 |
| <i>Lrp1</i>          | chr10:127538160-127621148 | 0.0278 | 0.0354 | 0.3496  | 0.579163 |
| <i>Gm26347</i>       | chr10:128435913-128436044 | 3.0703 | 2.1990 | -0.4815 | 0.611396 |
| <i>Gm12043</i>       | chr11:21370399-21374161   | 0.0970 | 0.0389 | -1.3181 | 0.403123 |
| <i>Mir3061</i>       | chr11:52126745-52126836   | 5.9068 | 2.8326 | -1.0603 | 0.173434 |
| <i>Gm12208</i>       | chr11:52405315-52405478   | 2.4053 | 1.2298 | -0.9677 | 0.159688 |
| <i>Gm12303</i>       | chr11:68035037-68035710   | 0.6371 | 0.6266 | -0.0240 | 0.970437 |
| <i>Dnah2</i>         | chr11:69420808-69549110   | 0.0198 | 0.0202 | 0.0346  | 0.979406 |
| <i>Mir467f</i>       | chr11:69635399-69635519   | 3.0327 | 2.7420 | -0.1454 | 0.800241 |
| <i>Doc2b</i>         | chr11:75768965-75796049   | 0.0992 | 0.0421 | -1.2379 | 0.187524 |
| <i>Rab11fip4os2</i>  | chr11:79670371-79675128   | 0.6153 | 0.3395 | -0.8577 | 0.135939 |
| <i>Gm22311</i>       | chr11:83764637-83764747   | 4.0577 | 3.4442 | -0.2365 | 0.783169 |
| <i>Mir21a</i>        | chr11:86584066-86584158   | 6.6961 | 3.1441 | -1.0906 | 0.228271 |
| <i>Gm11510</i>       | chr11:88432985-88433514   | 1.3451 | 1.0402 | -0.3708 | 0.558143 |
| <i>Col1a1</i>        | chr11:94936223-94953042   | 0.0564 | 0.0507 | -0.1534 | 0.865052 |
| <i>Gm11520</i>       | chr11:95310428-95324496   | 0.5538 | 0.5253 | -0.0761 | 0.926581 |
| <i>BC030867</i>      | chr11:102248881-102265187 | 0.1806 | 0.1822 | 0.0132  | 0.983270 |
| <i>Gm11628</i>       | chr11:102492438-102492609 | 2.7579 | 0.7460 | -1.8863 | 0.026488 |
| <i>Ace</i>           | chr11:105967944-105989964 | 0.0737 | 0.0555 | -0.4098 | 0.711672 |
| <i>Cd300a</i>        | chr11:114890040-114904654 | 0.0616 | 0.0816 | 0.4052  | 0.621401 |
| <i>Cd300ld</i>       | chr11:114982273-114989922 | 0.1203 | 0.1201 | -0.0023 | 0.998683 |
| <i>Ccdc57</i>        | chr11:120826528-120932872 | 0.1084 | 0.0921 | -0.2364 | 0.691881 |
| <i>Klhl29</i>        | chr12:5077471-5375682     | 0.0580 | 0.0286 | -1.0166 | 0.232784 |
| <i>Gm7099</i>        | chr12:9429545-9430099     | 0.8572 | 0.7991 | -0.1013 | 0.868355 |
| <i>1700030C10Rik</i> | chr12:20814256-20815727   | 0.2721 | 0.5487 | 1.0118  | 0.243622 |

|                      |                           |        |        |         |          |
|----------------------|---------------------------|--------|--------|---------|----------|
| NA                   | chr12:21273303-21273532   | 2.0640 | 1.2791 | -0.6903 | 0.236724 |
| <i>Lrr1</i>          | chr12:69168813-69179010   | 0.2769 | 0.2780 | 0.0056  | 0.995389 |
| <i>Serpina3f</i>     | chr12:104214543-104221129 | 0.2252 | 0.3363 | 0.5785  | 0.582174 |
| <i>Bmp6</i>          | chr13:38345715-38499728   | 0.1709 | 0.1609 | -0.0869 | 0.865275 |
| <i>Mak</i>           | chr13:41025119-41079706   | 0.1247 | 0.1232 | -0.0171 | 0.972578 |
| <i>Gm17622</i>       | chr13:96490732-96491120   | 7.3954 | 7.2895 | -0.0208 | 0.978730 |
| <i>Mir3096</i>       | chr5:23710990-23711061    | 4.4927 | 3.0897 | -0.5401 | 0.538636 |
| <i>Rbm47</i>         | chr5:66016548-66173117    | 0.0666 | 0.0829 | 0.3148  | 0.466169 |
| <i>Adrbk2</i>        | chr5:112910477-113015514  | 0.0586 | 0.0946 | 0.6927  | 0.328079 |
| <i>Gm13822</i>       | chr5:114917317-114923277  | 1.5163 | 1.4817 | -0.0333 | 0.969964 |
| <i>Gm13830</i>       | chr5:115301119-115319208  | 0.1797 | 0.1295 | -0.4717 | 0.544263 |
| <i>Gm15607</i>       | chr5:135637138-135637496  | 1.3098 | 1.6444 | 0.3282  | 0.657310 |
| <i>Gm8428</i>        | chr6:8377595-8379379      | 0.2797 | 0.3357 | 0.2635  | 0.712021 |
| <i>Mir29a</i>        | chr6:31062659-31062747    | 4.7592 | 5.3546 | 0.1701  | 0.826959 |
| <i>Gm15527</i>       | chr6:54245741-54279076    | 0.0965 | 0.1990 | 1.0449  | 0.269053 |
| <i>Prdm5</i>         | chr6:65778987-65936373    | 0.0955 | 0.1040 | 0.1222  | 0.867868 |
| <i>Gm15401</i>       | chr6:72629287-72637717    | 0.2183 | 0.3210 | 0.5563  | 0.395559 |
| <i>Gm20594</i>       | chr6:79818030-79818364    | 1.1104 | 0.1655 | -2.7464 | 0.115824 |
| <i>Gm25178</i>       | chr6:88405976-88406301    | 1.5189 | 1.2347 | -0.2989 | 0.592828 |
| <i>Mkxn2os</i>       | chr6:115583543-115592576  | 0.1887 | 0.1288 | -0.5508 | 0.521911 |
| NA                   | chr6:116173633-116174494  | 0.6243 | 0.4718 | -0.4042 | 0.426620 |
| <i>Rassf4</i>        | chr6:116633007-116673836  | 0.0658 | 0.1015 | 0.6269  | 0.315932 |
| <i>Cd4</i>           | chr6:124864691-124888221  | 0.1212 | 0.1064 | -0.1876 | 0.875710 |
| <i>4933413G19Rik</i> | chr6:128375455-128385144  | 0.1694 | 0.1373 | -0.3035 | 0.743338 |
| <i>Clec12a</i>       | chr6:129342690-129365303  | 0.0902 | 0.0859 | -0.0718 | 0.873837 |
| <i>Clec7a</i>        | chr6:129461590-129472777  | 0.2096 | 0.4134 | 0.9795  | 0.383044 |
| <i>Klra9</i>         | chr6:130178752-130193112  | 0.3841 | 0.7567 | 0.9784  | 0.232760 |
| <i>Gm6654</i>        | chr6:146647240-146647588  | 1.6375 | 1.2051 | -0.4423 | 0.158065 |
| <i>Myadm</i>         | chr7:3289037-3299345      | 0.1398 | 0.2899 | 1.0526  | 0.132709 |
| <i>Ncr1</i>          | chr7:4337723-4345164      | 0.3118 | 0.2777 | -0.1669 | 0.864181 |
| <i>Gm15494</i>       | chr7:4445696-4471249      | 2.2669 | 0.5860 | -1.9517 | 0.091477 |
| <i>Pla2g4c</i>       | chr7:13324654-13360672    | 0.0985 | 0.0579 | -0.7669 | 0.382391 |
| <i>Cadm4</i>         | chr7:24482022-24504539    | 0.2071 | 0.1028 | -1.0102 | 0.203530 |
| <i>Cd177</i>         | chr7:24743984-24760311    | 0.1406 | 0.1418 | 0.0125  | 0.989166 |
| <i>Sptbn4</i>        | chr7:27356382-27447686    | 0.0556 | 0.0341 | -0.7058 | 0.565058 |
| <i>Siglecg</i>       | chr7:43408203-43418358    | 0.0680 | 0.0766 | 0.1712  | 0.778848 |
| <i>Gm6226</i>        | chr7:58836792-58837938    | 0.3185 | 0.3497 | 0.1350  | 0.843639 |
| <i>Gm25282</i>       | chr7:75668872-75668956    | 3.9703 | 4.5285 | 0.1898  | 0.839704 |
| <i>Gm24224</i>       | chr7:79352487-79352745    | 2.1560 | 2.2262 | 0.0462  | 0.943974 |
| <i>9130208D14Rik</i> | chr7:105824222-105831515  | 0.0607 | 0.0832 | 0.4564  | 0.275272 |
| NA                   | chr7:120688218-120688323  | 5.1809 | 4.5722 | -0.1803 | 0.715236 |
| <i>Il27</i>          | chr7:126589009-126594941  | 0.5729 | 0.4121 | -0.4751 | 0.439596 |
| <i>Ifitm3</i>        | chr7:141009585-141010770  | 0.5727 | 0.8666 | 0.5976  | 0.577562 |
| <i>Gm10575</i>       | chr7:141461480-141467771  | 0.2646 | 0.1985 | -0.4141 | 0.591684 |
| <i>Kcnq1</i>         | chr7:143107253-143427042  | 0.1428 | 0.1033 | -0.4674 | 0.423351 |
| <i>Lrrc8e</i>        | chr8:4226826-4237470      | 0.1060 | 0.0608 | -0.8016 | 0.377072 |
| <i>1700016D06Rik</i> | chr8:11654920-11678750    | 0.3635 | 0.2765 | -0.3945 | 0.552863 |
| <i>1700041G16Rik</i> | chr8:22808274-22808732    | 1.0615 | 1.2044 | 0.1822  | 0.816314 |
| <i>Tlr3</i>          | chr8:45395664-45410608    | 0.0544 | 0.0710 | 0.3844  | 0.690217 |
| <i>Crfl1</i>         | chr8:70493157-70504081    | 0.3017 | 0.2332 | -0.3715 | 0.555009 |
| <i>Tppp3</i>         | chr8:105467492-105471526  | 0.3103 | 0.3363 | 0.1161  | 0.707098 |
| <i>Gm10614</i>       | chr8:120589530-120593801  | 0.1598 | 0.1653 | 0.0488  | 0.950170 |
| <i>Il17c</i>         | chr8:122422019-122423639  | 0.6834 | 0.7936 | 0.2156  | 0.644220 |
| <i>Gm23008</i>       | chr9:20890756-20890836    | 6.0648 | 6.1546 | 0.0212  | 0.951185 |
| <i>Gm17545</i>       | chr9:22454289-22462062    | 6.0172 | 1.7860 | -1.7524 | 0.036986 |
| <i>Adams2</i>        | chr9:30942561-30963838    | 0.0998 | 0.1164 | 0.2218  | 0.813174 |
| <i>C1qtnf5</i>       | chr9:44107244-44109187    | 0.3621 | 0.2730 | -0.4075 | 0.512288 |
| <i>Gm20444</i>       | chr9:44107300-44108960    | 0.4327 | 0.1750 | -1.3061 | 0.228178 |
| <i>Gm25558</i>       | chr9:50887949-50888055    | 4.0423 | 2.2169 | -0.8666 | 0.256623 |
| <i>Dmxl2</i>         | chr9:54365157-54501760    | 0.0373 | 0.0165 | -1.1798 | 0.304135 |
| <i>Paqr5</i>         | chr9:61953480-62026856    | 0.1072 | 0.0660 | -0.6986 | 0.469492 |
| <i>Impg1</i>         | chr9:80313329-80465438    | 0.1361 | 0.2481 | 0.8666  | 0.245470 |
| <i>Nek11</i>         | chr9:105162466-105395524  | 0.1314 | 0.1755 | 0.4182  | 0.322128 |
| <i>Tlr9</i>          | chr9:106222597-106226876  | 0.0916 | 0.0850 | -0.1074 | 0.909741 |
| <i>Xlr</i>           | chrX:53777117-53797706    | 0.1620 | 0.0619 | -1.3873 | 0.312351 |
| <i>Rab39b</i>        | chrX:75572045-75578231    | 0.1292 | 0.0972 | -0.4095 | 0.660067 |
| <i>Pin4</i>          | chrX:102119446-102127669  | 0.9593 | 0.7051 | -0.4441 | 0.380103 |
| <i>Tlr13</i>         | chrX:106143203-106160493  | 0.1046 | 0.0769 | -0.4448 | 0.635432 |
| <i>Dach2</i>         | chrX:113297509-113836386  | 0.0438 | 0.0185 | -1.2386 | 0.224983 |
| <i>Mir3112</i>       | chrX:134075315-134075397  | 5.4234 | 4.7100 | -0.2035 | 0.775765 |
| <i>Lhfp1</i>         | chrX:145290358-145349089  | 0.2048 | 0.3655 | 0.8355  | 0.161111 |



|                      |                          |        |        |         |          |
|----------------------|--------------------------|--------|--------|---------|----------|
| <i>Gm15131</i>       | chrX:150707020-150707615 | 0.7431 | 0.4879 | -0.6070 | 0.335160 |
| <i>Gm15246</i>       | chrX:169320621-169368190 | 0.4664 | 0.1179 | -1.9844 | 0.277602 |
| <i>Acot10</i>        | chr15:20665218-20666750  | 0.2563 | 0.1438 | -0.8341 | 0.298484 |
| <i>n-R5s39</i>       | chr15:39146379-39146487  | 4.3276 | 1.6984 | -1.3494 | 0.055621 |
| <i>2010109I03Rik</i> | chr15:74878335-74881704  | 0.2442 | 0.2318 | -0.0753 | 0.866240 |
| <i>Nrbp2</i>         | chr15:76085594-76090013  | 0.1567 | 0.1476 | -0.0868 | 0.921503 |
| <i>Csf2rb</i>        | chr15:78325989-78351000  | 0.0621 | 0.0897 | 0.5301  | 0.567496 |
| <i>Card10</i>        | chr15:78775137-78803042  | 0.0769 | 0.0770 | 0.0013  | 0.998506 |
| <i>Gm6612</i>        | chr15:80952504-80952899  | 1.3320 | 2.2232 | 0.7391  | 0.128185 |
| <i>Plxnb2</i>        | chr15:89155548-89171120  | 0.0712 | 0.0954 | 0.4230  | 0.456370 |
| <i>Trav20</i>        | chr14:53863131-53863657  | 1.4046 | 0.5100 | -1.4616 | 0.122660 |
| <i>Traj49</i>        | chr14:54168685-54168744  | 7.5376 | 7.8255 | 0.0541  | 0.931883 |
| <i>Gzmc</i>          | chr14:56231400-56234656  | 0.3389 | 0.2945 | -0.2027 | 0.797357 |
| <i>Loxl2</i>         | chr14:69609170-69695833  | 0.0878 | 0.0864 | -0.0241 | 0.956071 |
| <i>Hr</i>            | chr14:70552211-70573548  | 0.0573 | 0.0316 | -0.8579 | 0.244846 |
| <i>Gm5493</i>        | chr17:22739943-22751509  | 0.2356 | 0.1772 | -0.4108 | 0.330150 |
| <i>Gm10012</i>       | chr17:25901855-25902227  | 1.3189 | 1.1242 | -0.2305 | 0.627374 |
| <i>Gm15597</i>       | chr17:27959614-27965316  | 0.4508 | 0.2989 | -0.5926 | 0.379646 |
| <i>Scube3</i>        | chr17:28142315-28174852  | 0.0716 | 0.0595 | -0.2676 | 0.752406 |
| <i>Cbs</i>           | chr17:31612622-31637199  | 0.1868 | 0.1703 | -0.1333 | 0.694976 |
| <i>Ncr3-ps</i>       | chr17:35180534-35184662  | 0.8081 | 0.8080 | -0.0001 | 0.999851 |
| <i>Gm20546</i>       | chr17:36248820-36253679  | 0.2606 | 0.2017 | -0.3695 | 0.647385 |
| <i>Spats1</i>        | chr17:45448936-45474938  | 0.5245 | 0.4581 | -0.1953 | 0.531365 |
| <i>Emr4</i>          | chr17:55749983-55853662  | 0.0866 | 0.0639 | -0.4393 | 0.639073 |
| <i>n-R5s29</i>       | chr17:78858933-78859052  | 4.7768 | 6.2746 | 0.3935  | 0.443835 |
| <i>AU021092</i>      | chr16:5211827-5222299    | 0.3968 | 0.4303 | 0.1168  | 0.582657 |
| <i>Gm7541</i>        | chr16:8623185-8623720    | 0.9245 | 0.7228 | -0.3550 | 0.554516 |
| <i>Tssk1</i>         | chr16:17894202-17895651  | 0.3627 | 0.2802 | -0.3722 | 0.505807 |
| <i>Gm9816</i>        | chr16:62716952-62718810  | 0.2818 | 0.1781 | -0.6617 | 0.224922 |
| <i>Fam3b</i>         | chr16:97471049-97504936  | 0.1974 | 0.2675 | 0.4389  | 0.634003 |
| <i>Batf2</i>         | chr19:6140982-6172476    | 0.1326 | 0.0795 | -0.7382 | 0.433668 |
| <i>Gm16274</i>       | chr19:12568234-12568826  | 0.8857 | 0.8064 | -0.1353 | 0.779824 |
| <i>Gldc</i>          | chr19:30098448-30175418  | 0.0978 | 0.1264 | 0.3709  | 0.650220 |
| <i>Tcf7l2</i>        | chr19:55741809-55933654  | 0.0465 | 0.0361 | -0.3653 | 0.567842 |
| <i>4930439A04Rik</i> | chr1:37329666-37334172   | 0.5978 | 0.2104 | -1.5063 | 0.056396 |
| <i>Slc40a1</i>       | chr1:45908069-45925594   | 0.1066 | 0.1753 | 0.7173  | 0.361288 |
| <i>Gm6822</i>        | chr1:55160739-55161053   | 1.3018 | 1.2894 | -0.0138 | 0.985918 |
| <i>Fn1</i>           | chr1:71585522-71653171   | 0.0841 | 0.0534 | -0.6550 | 0.589503 |
| <i>Cxcr2</i>         | chr1:74153988-74161238   | 0.1662 | 0.2242 | 0.4317  | 0.662366 |
| <i>Serpine2</i>      | chr1:79794196-79858696   | 0.1332 | 0.0614 | -1.1164 | 0.201377 |
| <i>Col4a3</i>        | chr1:82586920-82722059   | 0.0417 | 0.0185 | -1.1698 | 0.135256 |
| <i>Pla2g4a</i>       | chr1:149829617-149961290 | 0.0549 | 0.0544 | -0.0154 | 0.983889 |
| <i>BC026585</i>      | chr1:157458579-157489060 | 0.2871 | 0.3628 | 0.3376  | 0.511217 |
| <i>Fcgr2b</i>        | chr1:170960557-170976547 | 0.1626 | 0.2000 | 0.2985  | 0.582949 |
| <i>Ifi204</i>        | chr1:173747292-173766876 | 0.2202 | 0.4060 | 0.8829  | 0.150746 |
| <i>Osbpl1a</i>       | chr18:12755313-12941841  | 0.0534 | 0.0397 | -0.4277 | 0.636361 |
| <i>Gm15333</i>       | chr18:39341600-39341964  | 0.7880 | 0.5543 | -0.5075 | 0.605596 |
| <i>Pdgfrb</i>        | chr18:61045149-61085061  | 0.0674 | 0.0434 | -0.6373 | 0.392046 |
| <i>Gm26398</i>       | chr2:10504646-10504773   | 4.0440 | 2.2830 | -0.8248 | 0.267500 |
| <i>Gm25263</i>       | chr2:10509884-10509984   | 2.0460 | 0.1807 | -3.5010 | 0.302731 |
| <i>Adamsl2</i>       | chr2:27079378-27108981   | 0.0770 | 0.0570 | -0.4338 | 0.470276 |
| <i>Ak8</i>           | chr2:28700163-28813165   | 0.2483 | 0.0580 | -2.0979 | 0.017985 |
| <i>Stom</i>          | chr2:35313985-35336976   | 0.1542 | 0.2705 | 0.8108  | 0.106120 |
| <i>Gm13428</i>       | chr2:36137338-36137703   | 0.8859 | 1.1684 | 0.3993  | 0.665625 |
| <i>Gm13543</i>       | chr2:37672207-37673003   | 0.7451 | 0.7876 | 0.0801  | 0.858625 |
| <i>Gm13594</i>       | chr2:65238755-65239675   | 1.2398 | 1.0339 | -0.2620 | 0.479945 |
| <i>Gm13709</i>       | chr2:73370908-73379297   | 0.8399 | 0.7994 | -0.0713 | 0.897129 |
| <i>Gm14425</i>       | chr2:74855705-74856311   | 0.8194 | 0.5759 | -0.5086 | 0.348924 |
| <i>Gm13651</i>       | chr2:77291330-77292440   | 0.4083 | 0.2818 | -0.5350 | 0.291338 |
| <i>Pacsin3</i>       | chr2:91255953-91264679   | 0.1000 | 0.0684 | -0.5473 | 0.356088 |
| <i>ltpa-ps1</i>      | chr2:94384501-94385098   | 0.6657 | 0.7435 | 0.1595  | 0.817205 |
| <i>Gm24644</i>       | chr2:104040668-104040807 | 3.8878 | 2.7824 | -0.4826 | 0.392196 |
| <i>Gm13961</i>       | chr2:111182634-111187406 | 0.0859 | 0.1106 | 0.3641  | 0.480610 |
| <i>Il1b</i>          | chr2:129364569-129371139 | 0.3097 | 0.4257 | 0.4590  | 0.653763 |
| <i>Gm14051</i>       | chr2:132144532-132220250 | 0.8834 | 1.0679 | 0.2736  | 0.771403 |
| <i>Zfp345</i>        | chr2:150470990-150485091 | 0.0982 | 0.0405 | -1.2776 | 0.332057 |
| <i>Mir695</i>        | chr2:155356816-155356925 | 2.2071 | 0.1631 | -3.7580 | 0.257078 |
| <i>4930405A21Rik</i> | chr2:156714539-156720909 | 0.4981 | 0.5776 | 0.2136  | 0.722182 |
| <i>Mir3474</i>       | chr2:158638582-158638640 | 6.3544 | 8.9342 | 0.4916  | 0.517754 |
| <i>NA</i>            | chr3:32365774-32367436   | 0.3425 | 0.3740 | 0.1268  | 0.716491 |
| <i>Gm12564</i>       | chr3:37556182-37556503   | 1.7821 | 1.4264 | -0.3212 | 0.363718 |

|                      |                           |        |         |         |          |
|----------------------|---------------------------|--------|---------|---------|----------|
| <i>Mgarp</i>         | chr3:51388414-51396738    | 0.1397 | 0.0964  | -0.5341 | 0.666926 |
| <i>Hist2h3c2</i>     | chr3:96238109-96239127    | 0.4150 | 0.3946  | -0.0724 | 0.923837 |
| <i>Gm12517</i>       | chr3:108602390-108602815  | 1.0381 | 1.3410  | 0.3693  | 0.334703 |
| <i>Npnt</i>          | chr3:132881744-132950291  | 0.0762 | 0.0514  | -0.5691 | 0.742960 |
| <i>Slc9b2</i>        | chr3:135307699-135342767  | 0.1829 | 0.1460  | -0.3253 | 0.677812 |
| <i>Gm26857</i>       | chr4:3678116-3689548      | 0.1268 | 0.1002  | -0.3401 | 0.707090 |
| <i>Gm26254</i>       | chr4:31998623-31998741    | 3.6946 | 2.6442  | -0.4826 | 0.577990 |
| <i>Mir207</i>        | chr4:40722916-40722995    | 5.4138 | 2.7680  | -0.9678 | 0.098247 |
| <i>Gm24837</i>       | chr4:41211501-41211582    | 4.9571 | 2.7113  | -0.8705 | 0.223333 |
| <i>Car9</i>          | chr4:43506965-43513729    | 0.2726 | 0.3205  | 0.2336  | 0.626108 |
| <i>Gm11210</i>       | chr4:62705980-62725737    | 1.3381 | 1.0354  | -0.3700 | 0.475962 |
| <i>Gm11224</i>       | chr4:69954165-69955276    | 0.2601 | 0.0667  | -1.9634 | 0.191997 |
| <i>Gm12891</i>       | chr4:122925832-122926072  | 1.3916 | 1.6069  | 0.2076  | 0.739900 |
| <i>NA</i>            | chr4:129219456-129219544  | 4.3547 | 3.3326  | -0.3859 | 0.618879 |
| <i>6030445D17Rik</i> | chr4:136462249-136463977  | 0.2744 | 0.3063  | 0.1587  | 0.760468 |
| <i>Tmem51</i>        | chr4:142030991-142084304  | 0.2189 | 0.1568  | -0.4814 | 0.490891 |
| <i>Gm13142</i>       | chr4:147102326-147103981  | 0.3543 | 0.1372  | -1.3685 | 0.061473 |
| <i>Gm13151</i>       | chr4:147305673-147333734  | 0.1169 | 0.0258  | -2.1773 | 0.222810 |
| <i>Oit3</i>          | chr10:59422957-59441778   | 0.0704 | 0.1841  | 1.3859  | 0.015094 |
| <i>Atcayos</i>       | chr10:81194608-81210877   | 0.0679 | 0.1369  | 1.0127  | 0.198510 |
| <i>Dram1</i>         | chr10:88322803-88379080   | 0.1407 | 0.2223  | 0.6596  | 0.288891 |
| <i>Kif5a</i>         | chr10:127225695-127263363 | 0.0483 | 0.1053  | 1.1240  | 0.078875 |
| <i>Mir3060</i>       | chr11:4139363-4139446     | 4.1542 | 6.1579  | 0.5679  | 0.205303 |
| <i>Gm22121</i>       | chr11:44469012-44469066   | 4.4917 | 11.5681 | 1.3648  | 0.067596 |
| <i>Ebf1</i>          | chr11:44617316-45008091   | 0.0264 | 0.0492  | 0.9002  | 0.208006 |
| <i>1700016K19Rik</i> | chr11:75999911-76003569   | 0.4861 | 0.7570  | 0.6389  | 0.066245 |
| <i>Evpl</i>          | chr11:116220558-116238077 | 0.0461 | 0.0681  | 0.5648  | 0.477653 |
| <i>4933406C10Rik</i> | chr12:32919383-32953789   | 0.1158 | 0.1628  | 0.4917  | 0.520694 |
| <i>Smoc1</i>         | chr12:81026807-81186414   | 0.0225 | 0.1612  | 2.8395  | 0.322302 |
| <i>Gm26623</i>       | chr12:83620209-83621174   | 0.1338 | 0.4264  | 1.6718  | 0.187186 |
| <i>Gm19898</i>       | chr12:99245670-99245921   | 1.0983 | 1.7465  | 0.6692  | 0.238505 |
| <i>Igha</i>          | chr12:113258767-113260236 | 0.2146 | 0.2269  | 0.0805  | 0.961641 |
| <i>Ighg3</i>         | chr12:113359664-113361232 | 0.0001 | 0.2186  | 11.0940 | 0.355918 |
| <i>Dsp</i>           | chr13:38151327-38198577   | 0.0346 | 0.0930  | 1.4282  | 0.103407 |
| <i>Gm4149</i>        | chr13:75644863-75645226   | 1.2889 | 1.1073  | -0.2191 | 0.685237 |
| <i>Gm6044</i>        | chr5:64320255-64320754    | 0.7498 | 1.0383  | 0.4697  | 0.558374 |
| <i>Gm24840</i>       | chr5:123628200-123628347  | 2.3379 | 5.2338  | 1.1626  | 0.001737 |
| <i>Cyp3a13</i>       | chr5:137892931-137921619  | 0.0528 | 0.2051  | 1.9570  | 0.084283 |
| <i>Mir106b</i>       | chr5:138165736-138165818  | 4.8347 | 7.1504  | 0.5646  | 0.130124 |
| <i>Flt3</i>          | chr5:147330740-147400489  | 0.0311 | 0.0798  | 1.3578  | 0.075943 |
| <i>Igkv14-111</i>    | chr6:68256403-68256869    | 1.1484 | 2.1742  | 0.9209  | 0.139508 |
| <i>Klra14-ps</i>     | chr6:130149105-130160748  | 0.2312 | 0.9135  | 1.9821  | 0.065205 |
| <i>Rps4l</i>         | chr6:148354655-148355598  | 0.0551 | 0.3661  | 2.7319  | 0.211767 |
| <i>Cox6b2</i>        | chr7:4751791-4753094      | 0.3607 | 0.4779  | 0.4057  | 0.408841 |
| <i>Dgat2</i>         | chr7:99153662-99182713    | 0.1435 | 0.2762  | 0.9447  | 0.014046 |
| <i>Hbb-bs</i>        | chr7:103826533-103828096  | 0.2349 | 0.3363  | 0.5176  | 0.628344 |
| <i>Olfir524</i>      | chr7:140201742-140202800  | 0.2249 | 0.6787  | 1.5936  | 0.086864 |
| <i>Pkd1l2</i>        | chr8:116995678-117082449  | 0.0358 | 0.0710  | 0.9862  | 0.122227 |
| <i>Cpne7</i>         | chr8:123117373-123135182  | 0.0738 | 0.1250  | 0.7595  | 0.298572 |
| <i>Gm26870</i>       | chr9:3000281-3038313      | 0.0174 | 0.1142  | 2.7180  | 0.315924 |
| <i>Gm10718</i>       | chr9:3023546-3025218      | 0.0001 | 0.2653  | 11.3735 | 0.355918 |
| <i>Gm10717</i>       | chr9:3025416-3033289      | 0.0197 | 0.1040  | 2.4013  | 0.257310 |
| <i>Gm16218</i>       | chr9:65297531-65297919    | 1.1755 | 1.8922  | 0.6868  | 0.055001 |
| <i>Esyt3</i>         | chr9:99309966-99358530    | 0.1069 | 0.1559  | 0.5445  | 0.211130 |
| <i>Gm7598</i>        | chrX:38476460-38482486    | 0.1563 | 0.1408  | -0.1508 | 0.752729 |
| <i>Xlr3a</i>         | chrX:73086292-73097095    | 0.0079 | 0.0583  | 2.8820  | 0.373465 |
| <i>Dusp9</i>         | chrX:73639418-73643514    | 0.1294 | 0.1952  | 0.5929  | 0.228276 |
| <i>Awat2</i>         | chrX:100402220-100442717  | 0.2527 | 0.2304  | -0.1333 | 0.814677 |
| <i>Gm7117</i>        | chrX:105725127-105725532  | 0.6933 | 1.7130  | 1.3050  | 0.022839 |
| <i>Gm15228</i>       | chrX:167164096-167171278  | 0.1316 | 0.1276  | -0.0449 | 0.934522 |
| <i>Cacna1i</i>       | chr15:80287237-80398279   | 0.0182 | 0.0446  | 1.2884  | 0.117417 |
| <i>Smc1b</i>         | chr15:85064690-85131957   | 0.1124 | 0.0998  | -0.1717 | 0.687947 |
| <i>Gm21738</i>       | chr14:19415856-19418930   | 0.0214 | 0.5583  | 4.7036  | 0.247142 |
| <i>Trav3-1</i>       | chr14:52580706-52581213   | 1.2064 | 1.4866  | 0.3013  | 0.642510 |
| <i>Rem2</i>          | chr14:54476099-54480431   | 0.1019 | 0.2519  | 1.3059  | 0.165198 |
| <i>Syngap1</i>       | chr17:26941451-26970645   | 0.1079 | 0.1539  | 0.5115  | 0.088644 |
| <i>Fgd2</i>          | chr17:29360913-29379660   | 0.0670 | 0.1514  | 1.1762  | 0.059872 |
| <i>NA</i>            | chr17:34952239-34952309   | 5.8547 | 9.1391  | 0.6425  | 0.153465 |
| <i>Gm25706</i>       | chr17:80196157-80196404   | 1.5212 | 1.5613  | 0.0376  | 0.951918 |
| <i>Tnp2</i>          | chr16:10787935-10788655   | 0.7514 | 1.2002  | 0.6756  | 0.105407 |
| <i>Gm26822</i>       | chr16:10827926-10833507   | 0.1493 | 0.1887  | 0.3377  | 0.510293 |

|               |                           |        |         |         |          |
|---------------|---------------------------|--------|---------|---------|----------|
| Gm15694       | chr16:31987177-31987460   | 1.4491 | 2.0753  | 0.5182  | 0.378627 |
| Scd1          | chr19:44394450-44407709   | 0.0896 | 0.1786  | 0.9949  | 0.259925 |
| Wnt8b         | chr19:44493471-44514273   | 0.1093 | 0.2222  | 1.0238  | 0.005544 |
| Gm973         | chr1:59516263-59634508    | 0.1189 | 0.1832  | 0.6236  | 0.135156 |
| Rufy4         | chr1:74125540-74148223    | 0.1666 | 0.3067  | 0.8808  | 0.278070 |
| Gm8338        | chr1:119817762-119818125  | 0.1833 | 1.2125  | 2.7253  | 0.030605 |
| Il10          | chr1:131019844-131024974  | 0.1826 | 0.2224  | 0.2842  | 0.806075 |
| Fcrla         | chr1:170917575-170927583  | 0.1506 | 0.2407  | 0.6770  | 0.405270 |
| Gm23690       | chr1:181813606-181813700  | 4.1773 | 5.8574  | 0.4877  | 0.216642 |
| Bambi         | chr18:3507956-3516404     | 0.0718 | 0.1302  | 0.8586  | 0.136783 |
| Gm10269       | chr18:20682591-20682963   | 0.8158 | 1.6072  | 0.9783  | 0.175648 |
| Pter          | chr2:12924040-13003453    | 0.1322 | 0.2215  | 0.7446  | 0.043073 |
| Fcnaos        | chr2:25607891-25631761    | 0.2930 | 0.2924  | -0.0031 | 0.993473 |
| 1700026L06Rik | chr2:28692079-28699727    | 0.5647 | 0.6855  | 0.2796  | 0.471186 |
| Garnl3        | chr2:32986365-33131654    | 0.0288 | 0.0375  | 0.3808  | 0.644155 |
| Galnt3        | chr2:66082765-66124994    | 0.0965 | 0.1841  | 0.9317  | 0.095132 |
| Gm13818       | chr2:93794569-93795084    | 0.7825 | 0.9905  | 0.3401  | 0.507137 |
| Gm10801       | chr2:98662236-98664083    | 0.0946 | 5.5933  | 5.8862  | 0.343814 |
| Gm10800       | chr2:98666546-98667301    | 0.1140 | 12.7433 | 6.8049  | 0.331641 |
| Zfp133-ps     | chr2:144459279-144500267  | 0.1612 | 0.1277  | -0.3358 | 0.590043 |
| Vmn1r-ps1     | chr2:174591229-174591802  | 0.6112 | 0.7972  | 0.3834  | 0.444869 |
| mt-Tl2        | chrM:11670-11741          | 5.2953 | 8.2176  | 0.6340  | 0.297177 |
| Zc2hc1a       | chr3:7503425-7553848      | 0.0385 | 0.1138  | 1.5648  | 0.220294 |
| Zfp704        | chr3:9427010-9610085      | 0.0301 | 0.0383  | 0.3480  | 0.604472 |
| Mlf1          | chr3:67374096-67400003    | 0.0483 | 0.1260  | 1.3845  | 0.536803 |
| Muc1          | chr3:89229056-89233381    | 0.1420 | 0.1712  | 0.2698  | 0.747791 |
| Adh1          | chr3:138260990-138290698  | 0.1275 | 0.1977  | 0.6336  | 0.407453 |
| Gm16231       | chr3:152943312-152943944  | 0.8873 | 1.2665  | 0.5133  | 0.585189 |
| Gm25445       | chr4:53720901-53721200    | 1.2381 | 1.0990  | -0.1720 | 0.766099 |
| Gm11212       | chr4:63350410-63353846    | 0.5812 | 1.4516  | 1.3206  | 0.000521 |
| Gm12793       | chr4:101341356-101341648  | 1.1446 | 2.1987  | 0.9419  | 0.081267 |
| Mir761        | chr4:109017654-109017730  | 4.1649 | 4.3005  | 0.0462  | 0.959248 |
| Col9a2        | chr4:121039384-121055322  | 0.0997 | 0.1112  | 0.1581  | 0.865219 |
| Gm13092       | chr4:150315176-150315515  | 0.8815 | 1.4590  | 0.7270  | 0.221768 |
| Epm2a         | chr10:11343403-11459644   | 0.1000 | 0.1910  | 0.9327  | 0.269264 |
| Gm16106       | chr10:81504472-81504766   | 1.1433 | 1.7601  | 0.6224  | 0.398711 |
| Lif           | chr11:4257556-4272514     | 0.0393 | 0.0848  | 1.1095  | 0.248468 |
| Stc2          | chr11:31357306-31370074   | 0.0185 | 0.1454  | 2.9712  | 0.008054 |
| Rhbdl3        | chr11:80300911-80355955   | 0.0785 | 0.0775  | -0.0193 | 0.975483 |
| Gm11513       | chr11:95032758-95038283   | 0.5697 | 0.6407  | 0.1692  | 0.731526 |
| Ragef11       | chr11:98836784-98853697   | 0.0185 | 0.1402  | 2.9206  | 0.031150 |
| Gcnt4         | chr13:96924688-96950912   | 0.0855 | 0.0906  | 0.0835  | 0.843389 |
| Gm23458       | chr5:123360831-123361000  | 2.0252 | 3.4566  | 0.7713  | 0.221737 |
| Gm25436       | chr6:68257393-68257538    | 1.6178 | 4.5266  | 1.4844  | 0.038727 |
| Gm15773       | chr7:12603195-12604643    | 0.1836 | 0.3965  | 1.1107  | 0.159896 |
| 1700069B07Rik | chr7:121707188-121708011  | 0.5348 | 0.5428  | 0.0213  | 0.974762 |
| NA            | chr7:130834436-130834523  | 3.2183 | 27.8860 | 3.1152  | 0.338589 |
| Syce1         | chr7:140777228-140787854  | 0.0433 | 0.9573  | 4.4660  | 0.346003 |
| Gm16183       | chr8:84611201-84617184    | 0.3428 | 0.5378  | 0.6495  | 0.074638 |
| Eepd1         | chr9:25481546-25604110    | 0.1730 | 0.2113  | 0.2889  | 0.599051 |
| BC049352      | chr9:45182006-45250020    | 0.1049 | 0.3062  | 1.5452  | 0.020785 |
| Gm7613        | chr9:59766716-59767203    | 0.2297 | 0.6058  | 1.3994  | 0.312788 |
| Gm6964        | chrX:85793683-85794120    | 0.8474 | 1.0490  | 0.3078  | 0.590723 |
| Gm26020       | chrX:105819882-105820065  | 2.5791 | 4.2251  | 0.7121  | 0.115518 |
| Phldb2        | chr16:45746242-45953598   | 0.0470 | 0.0981  | 1.0630  | 0.255283 |
| Rpl12-ps1     | chr1:36957929-36958427    | 0.8705 | 0.7752  | -0.1673 | 0.744061 |
| Ppfa4         | chr1:134296782-134332928  | 0.0481 | 0.0911  | 0.9202  | 0.113229 |
| Gm16701       | chr1:166974023-167000841  | 0.0877 | 0.2819  | 1.6849  | 0.009051 |
| Eif3j2        | chr18:43475417-43477836   | 0.2349 | 0.2573  | 0.1312  | 0.788264 |
| Gm13219       | chr2:9352430-9447676      | 0.0637 | 0.0949  | 0.5756  | 0.460216 |
| Gm26491       | chr2:10475499-10475620    | 2.9268 | 2.8916  | -0.0175 | 0.976185 |
| Lgr4          | chr2:109917646-110014257  | 0.0525 | 0.0505  | -0.0568 | 0.946553 |
| Gm21596       | chr2:113919246-113920562  | 0.3670 | 0.5013  | 0.4500  | 0.111678 |
| Gm13991       | chr2:116527842-116528490  | 0.3488 | 1.0758  | 1.6250  | 0.029602 |
| Rps12-ps10    | chr2:122219992-122220391  | 1.1309 | 1.3763  | 0.2833  | 0.526999 |
| Gm22334       | chr2:155652891-155653024  | 3.1454 | 3.7455  | 0.2519  | 0.564173 |
| Vcam1         | chr3:116110019-116129688  | 0.0775 | 0.1255  | 0.6947  | 0.415737 |
| Gm12933       | chr4:126665253-126666125  | 0.1797 | 0.2772  | 0.6250  | 0.687373 |
| Rdh1          | chr10:127759720-127768297 | 0.0810 | 0.1254  | 0.6310  | 0.241836 |
| BC049762      | chr11:51253650-51263046   | 0.2464 | 0.4678  | 0.9247  | 0.112134 |
| Ccl9          | chr11:83572918-83578636   | 0.0646 | 0.2478  | 1.9400  | 0.078576 |

|                      |                           |        |        |         |          |
|----------------------|---------------------------|--------|--------|---------|----------|
| <i>Rnu1a1</i>        | chr11:87422866-87423030   | 1.9394 | 2.5518 | 0.3959  | 0.536901 |
| <i>Gm22059</i>       | chr11:98710985-98711089   | 1.4535 | 4.0364 | 1.4735  | 0.205550 |
| <i>Fam150b</i>       | chr12:30884321-30893854   | 0.1991 | 0.5092 | 1.3550  | 0.094362 |
| <i>Gm2830</i>        | chr13:54499704-54500089   | 1.1542 | 1.1322 | -0.0278 | 0.953883 |
| <i>Zfp934</i>        | chr13:62517499-62520544   | 0.2742 | 0.4000 | 0.5447  | 0.165686 |
| <i>Gm5864</i>        | chr5:32420002-32420972    | 0.3396 | 0.3892 | 0.1964  | 0.809855 |
| <i>Cxcl10</i>        | chr5:92346637-92348889    | 0.2711 | 0.5401 | 0.9944  | 0.102454 |
| <i>Gm8258</i>        | chr5:104775910-104776824  | 0.2965 | 0.8761 | 1.5632  | 0.113359 |
| <i>Vsig10</i>        | chr5:117319265-117355005  | 0.0428 | 0.0850 | 0.9896  | 0.423219 |
| <i>Prrt4</i>         | chr6:29169231-29179584    | 0.0673 | 0.1285 | 0.9333  | 0.106258 |
| <i>9130019P16Rik</i> | chr6:54269680-54430221    | 0.0412 | 0.0857 | 1.0543  | 0.134630 |
| <i>4930583K01Rik</i> | chr7:118243864-118245551  | 0.1531 | 0.6751 | 2.1403  | 0.129856 |
| <i>NA</i>            | chr7:144914470-144914541  | 2.8624 | 3.7892 | 0.4047  | 0.743323 |
| <i>Efnb2</i>         | chr8:8617433-8660773      | 0.1121 | 0.1616 | 0.5281  | 0.214536 |
| <i>Nqa1</i>          | chr8:107388224-107403206  | 0.2244 | 0.2923 | 0.3811  | 0.687076 |
| <i>Rpl19-ps12</i>    | chrX:6071221-6071812      | 0.9319 | 0.8588 | -0.1178 | 0.777942 |
| <i>Rgag4</i>         | chrX:102066543-102071304  | 0.0609 | 0.1351 | 1.1486  | 0.058567 |
| <i>Gm2093</i>        | chr15:3996038-4015858     | 0.1426 | 0.1340 | -0.0896 | 0.829681 |
| <i>Ly6i</i>          | chr15:74979811-74983430   | 0.2915 | 0.6468 | 1.1501  | 0.024001 |
| <i>Apol7c</i>        | chr15:77524866-77533315   | 0.1558 | 0.3606 | 1.2113  | 0.155777 |
| <i>Hspa1b</i>        | chr17:34956435-34959238   | 0.0120 | 0.0892 | 2.8911  | 0.375954 |
| <i>Vegfa</i>         | chr17:46016992-46032377   | 0.0756 | 0.1625 | 1.1045  | 0.081654 |
| <i>Gm9961</i>        | chr16:11901362-11930600   | 0.3984 | 0.4264 | 0.0979  | 0.932622 |
| <i>Gm15799</i>       | chr16:18937400-18937689   | 0.8359 | 1.3788 | 0.7220  | 0.336724 |
| <i>Gm8974</i>        | chr19:46205379-46205858   | 0.7091 | 0.9501 | 0.4221  | 0.338434 |
| <i>Acmsd</i>         | chr1:127729412-127767564  | 0.1230 | 0.2050 | 0.7363  | 0.239724 |
| <i>Gm8618</i>        | chr1:134109367-134109799  | 1.0232 | 1.3522 | 0.4022  | 0.151789 |
| <i>Mir1927</i>       | chr1:160295863-160295972  | 4.7889 | 5.3577 | 0.1619  | 0.627540 |
| <i>Gm26801</i>       | chr1:177429046-177443270  | 0.3851 | 0.2985 | -0.3675 | 0.441588 |
| <i>Bloc1s2-ps</i>    | chr2:52619731-52620601    | 0.3429 | 0.3965 | 0.2096  | 0.786921 |
| <i>Btbd18</i>        | chr2:84659078-84666306    | 0.0640 | 0.2053 | 1.6828  | 0.427166 |
| <i>Tcp11l1</i>       | chr2:104657287-104712169  | 0.0289 | 0.0710 | 1.2998  | 0.197821 |
| <i>Gm11687</i>       | chr2:144142487-144143373  | 0.4339 | 0.4091 | -0.0850 | 0.864529 |
| <i>Gm14277</i>       | chr2:157168819-157169179  | 0.9742 | 1.5220 | 0.6436  | 0.321404 |
| <i>Gm6570</i>        | chr3:87679650-87679998    | 0.9677 | 1.9002 | 0.9735  | 0.071398 |
| <i>Gm9387</i>        | chr3:128953781-128955098  | 0.2190 | 0.2336 | 0.0928  | 0.912622 |
| <i>Gm12460</i>       | chr4:51190106-51190463    | 0.3378 | 1.3805 | 2.0310  | 0.013874 |
| <i>Gm22300</i>       | chr4:56913641-56913767    | 1.5737 | 4.4904 | 1.5127  | 0.021908 |
| <i>C630043F03Rik</i> | chr4:72201347-72215352    | 0.1465 | 0.2617 | 0.8374  | 0.043433 |
| <i>Rps15a-ps4</i>    | chr4:132220045-132220437  | 0.6577 | 1.0217 | 0.6355  | 0.342101 |
| <i>Ccnd3-ps</i>      | chr4:139345299-139346180  | 0.5477 | 0.5798 | 0.0820  | 0.822090 |
| <i>Plch2</i>         | chr4:154983114-155056784  | 0.0142 | 0.0611 | 2.0998  | 0.029384 |
| <i>Aifm2</i>         | chr10:61715262-61739260   | 0.0612 | 0.1119 | 0.8701  | 0.232322 |
| <i>Gm26359</i>       | chr10:67235860-67235961   | 2.6973 | 3.3248 | 0.3017  | 0.788041 |
| <i>Gipc3</i>         | chr10:81337761-81343266   | 0.4438 | 0.5388 | 0.2798  | 0.334286 |
| <i>Aldh1l2</i>       | chr10:83487449-83534140   | 0.0421 | 0.0522 | 0.3100  | 0.733070 |
| <i>Gm6283</i>        | chr10:127313148-127314148 | 0.5334 | 0.6793 | 0.3489  | 0.207209 |
| <i>Pla2g3</i>        | chr11:3488283-3499350     | 0.0846 | 0.1694 | 1.0011  | 0.356879 |
| <i>Gm12186</i>       | chr11:48996686-48997713   | 0.3204 | 0.3437 | 0.1012  | 0.923167 |
| <i>Gm12259</i>       | chr11:58865964-58867154   | 1.4178 | 1.4642 | 0.0464  | 0.910423 |
| <i>Gm12267</i>       | chr11:60449209-60449970   | 0.5109 | 0.5130 | 0.0060  | 0.993838 |
| <i>Cldn7</i>         | chr11:69964778-69967885   | 0.2220 | 0.3677 | 0.7279  | 0.104778 |
| <i>Zmynd15</i>       | chr11:70459432-70466202   | 0.0327 | 0.0633 | 0.9515  | 0.446526 |
| <i>Gm22611</i>       | chr11:76974085-76974235   | 2.2764 | 2.7068 | 0.2498  | 0.735172 |
| <i>AU040972</i>      | chr11:79481718-79484031   | 0.3564 | 0.4441 | 0.3172  | 0.710053 |
| <i>Myo1d</i>         | chr11:80482125-80780025   | 0.0421 | 0.0779 | 0.8881  | 0.427309 |
| <i>Gm26394</i>       | chr11:98999507-98999622   | 2.5861 | 3.6861 | 0.5113  | 0.559028 |
| <i>Plcd3</i>         | chr11:103070303-103101658 | 0.0888 | 0.1304 | 0.5540  | 0.279395 |
| <i>Gm16045</i>       | chr11:117257648-117263437 | 0.1366 | 0.1183 | -0.2075 | 0.739315 |
| <i>Gm12586</i>       | chr11:121856772-121861227 | 0.2803 | 0.3496 | 0.3191  | 0.555624 |
| <i>Gm5432</i>        | chr12:15817002-15888155   | 0.1914 | 0.3424 | 0.8389  | 0.395239 |
| <i>2410018L13Rik</i> | chr12:22953996-23010284   | 0.0081 | 0.0682 | 3.0678  | 0.237289 |
| <i>Lamb1</i>         | chr12:31265233-31329644   | 0.0426 | 0.0522 | 0.2922  | 0.570491 |
| <i>Atxn71os1</i>     | chr12:33193993-33228854   | 0.1332 | 0.1522 | 0.1927  | 0.874502 |
| <i>Gm25970</i>       | chr12:65056572-65056658   | 2.3517 | 3.8852 | 0.7243  | 0.517648 |
| <i>Tnfrsf2</i>       | chr12:111442468-111455018 | 0.0557 | 0.1265 | 1.1840  | 0.302999 |
| <i>Ighv5-17</i>      | chr12:113859148-113859616 | 0.1242 | 0.9055 | 2.8658  | 0.314631 |
| <i>AK157302</i>      | chr13:21495222-21497146   | 0.1279 | 0.2669 | 1.0614  | 0.099676 |
| <i>AK157302</i>      | chr13:21495305-21495695   | 0.6306 | 1.3164 | 1.0618  | 0.099676 |
| <i>Gcm2</i>          | chr13:41101426-41109988   | 0.0663 | 0.1218 | 0.8768  | 0.421380 |
| <i>Gm25109</i>       | chr13:94517161-94517275   | 1.5434 | 4.3545 | 1.4964  | 0.027220 |

|                      |                           |        |        |         |          |
|----------------------|---------------------------|--------|--------|---------|----------|
| <i>Esm1</i>          | chr13:113209658-113218098 | 0.1214 | 0.2102 | 0.7916  | 0.386231 |
| <i>Fbxl13</i>        | chr5:21483846-21645605    | 0.0679 | 0.0848 | 0.3216  | 0.735773 |
| <i>Gm20432</i>       | chr5:25433035-25433285    | 1.2350 | 1.7028 | 0.4634  | 0.404984 |
| <i>Dpysl5</i>        | chr5:30711563-30799375    | 0.0001 | 0.0274 | 8.0988  | 0.355918 |
| <i>A930011G23Rik</i> | chr5:99297243-99729065    | 0.0075 | 0.0335 | 2.1582  | 0.167764 |
| <i>NA</i>            | chr5:105824510-105832434  | 0.0522 | 0.1550 | 1.5713  | 0.195413 |
| <i>Mir702</i>        | chr5:136991432-136991541  | 3.2181 | 4.5579 | 0.5022  | 0.350035 |
| <i>1700001J03Rik</i> | chr5:146182449-146185304  | 0.3569 | 0.5511 | 0.6268  | 0.502531 |
| <i>Rps10-ps4</i>     | chr5:147100561-147101053  | 0.5259 | 0.6411 | 0.2857  | 0.715480 |
| <i>1810059H22Rik</i> | chr5:148953747-148970122  | 0.0593 | 0.1842 | 1.6361  | 0.034599 |
| <i>Gm8615</i>        | chr5:149155445-149156081  | 0.4728 | 0.9599 | 1.0217  | 0.441104 |
| <i>Alox5ap</i>       | chr5:149265057-149288045  | 0.4363 | 0.7798 | 0.8379  | 0.351006 |
| <i>Ica1</i>          | chr6:8630526-8778488      | 0.0562 | 0.1484 | 1.4005  | 0.312297 |
| <i>2010107G12Rik</i> | chr6:34945277-34979054    | 0.0516 | 0.1334 | 1.3699  | 0.181533 |
| <i>Rbpsuh-rs3</i>    | chr6:46529350-46530922    | 0.1513 | 0.3879 | 1.3585  | 0.010851 |
| <i>Gm15573</i>       | chr6:53045883-53046423    | 0.2081 | 0.7151 | 1.7811  | 0.089827 |
| <i>Cpne9</i>         | chr6:113282306-113305627  | 0.0363 | 0.0711 | 0.9688  | 0.255225 |
| <i>C3ar1</i>         | chr6:122847137-122856161  | 0.0868 | 0.1373 | 0.6619  | 0.466114 |
| <i>Klra4</i>         | chr6:130043730-130067271  | 0.2913 | 0.7868 | 1.4335  | 0.249319 |
| <i>Dynlt1-ps1</i>    | chr6:135349087-135349780  | 0.5438 | 0.7133 | 0.3916  | 0.466745 |
| <i>Dennd5b</i>       | chr6:148988070-149101680  | 0.0180 | 0.0436 | 1.2755  | 0.221917 |
| <i>Nlrp12</i>        | chr7:3221509-3249740      | 0.0390 | 0.0856 | 1.1368  | 0.397255 |
| <i>Ceacam1</i>       | chr7:25461701-25477625    | 0.0675 | 0.0846 | 0.3246  | 0.718790 |
| <i>Spred3</i>        | chr7:29158828-29169841    | 0.0531 | 0.0679 | 0.3557  | 0.616046 |
| <i>Lgi4</i>          | chr7:31059341-31070935    | 0.0278 | 0.0845 | 1.6028  | 0.154874 |
| <i>Ttll13</i>        | chr7:80246375-80260821    | 0.0813 | 0.1235 | 0.6037  | 0.568661 |
| <i>Gm23479</i>       | chr7:98935893-98936015    | 0.6322 | 3.9344 | 2.6378  | 0.026810 |
| <i>Phox2a</i>        | chr7:101818312-101823166  | 0.0143 | 0.1183 | 3.0504  | 0.261350 |
| <i>Cox6a2</i>        | chr7:128205435-128206366  | 0.2245 | 0.7826 | 1.8016  | 0.052501 |
| <i>Ifitm6</i>        | chr7:141015811-141016892  | 0.2362 | 0.5180 | 1.1332  | 0.440932 |
| <i>Gm10284</i>       | chr8:57550298-57551303    | 0.0752 | 0.2954 | 1.9734  | 0.335261 |
| <i>Cyp4f18</i>       | chr8:71988481-72009626    | 0.1269 | 0.2481 | 0.9676  | 0.178728 |
| <i>Clgn</i>          | chr8:83389866-83428552    | 0.0087 | 0.0834 | 3.2524  | 0.215553 |
| <i>Lyl1</i>          | chr8:84701456-84704715    | 0.2183 | 0.2355 | 0.1098  | 0.842043 |
| <i>Rps6-ps2</i>      | chr8:88806390-88807140    | 0.4914 | 0.7623 | 0.6336  | 0.242997 |
| <i>A330008L17Rik</i> | chr8:99416641-99733438    | 0.0092 | 0.0999 | 3.4486  | 0.160687 |
| <i>NA</i>            | chr8:123859661-123860664  | 0.1148 | 0.4807 | 2.0655  | 0.098460 |
| <i>Gm16237</i>       | chr8:125224399-125227323  | 0.1963 | 0.2519 | 0.3598  | 0.683483 |
| <i>Pde4a</i>         | chr9:21165713-21213248    | 0.0301 | 0.0719 | 1.2587  | 0.017805 |
| <i>Gm16165</i>       | chr9:22669733-22670528    | 0.1815 | 0.6312 | 1.7980  | 0.194718 |
| <i>Tmem45b</i>       | chr9:31426198-31464238    | 0.1870 | 0.2128 | 0.1868  | 0.826279 |
| <i>Gm684</i>         | chr9:51270257-51278554    | 0.1561 | 0.2782 | 0.8341  | 0.500389 |
| <i>Igdcc4</i>        | chr9:65101485-65137940    | 0.0182 | 0.0325 | 0.8372  | 0.640381 |
| <i>Rnu5g</i>         | chr9:65201725-65201841    | 2.4580 | 3.8197 | 0.6360  | 0.505334 |
| <i>Tln2</i>          | chr9:67217086-67559703    | 0.0230 | 0.0259 | 0.1709  | 0.852056 |
| <i>Irak1bp1</i>      | chr9:82829805-82847688    | 0.1464 | 0.2613 | 0.8358  | 0.195538 |
| <i>Gpr62</i>         | chr9:106463972-106465940  | 0.1851 | 0.2707 | 0.5488  | 0.182067 |
| <i>Gm23232</i>       | chr9:114602087-114602192  | 2.6738 | 5.4427 | 1.0255  | 0.200236 |
| <i>Kcnd1</i>         | chrX:7822288-7838280      | 0.0745 | 0.0807 | 0.1147  | 0.884877 |
| <i>Mir363</i>        | chrX:52741692-52741767    | 6.2052 | 4.4511 | -0.4793 | 0.473870 |
| <i>Fhl1</i>          | chrX:56731786-56793346    | 0.0228 | 0.0703 | 1.6258  | 0.344319 |
| <i>Pnck</i>          | chrX:73655993-73660117    | 0.1889 | 0.1969 | 0.0601  | 0.914145 |
| <i>Gm14766</i>       | chrX:85790872-85791239    | 0.9020 | 1.2094 | 0.4230  | 0.516608 |
| <i>Gm9003</i>        | chrX:94422677-94423295    | 0.2849 | 0.8813 | 1.6290  | 0.309948 |
| <i>Spin4</i>         | chrX:95022506-95026682    | 0.0579 | 0.1234 | 1.0913  | 0.070318 |
| <i>Gm6238</i>        | chrX:104382041-104382506  | 0.8648 | 1.3511 | 0.6437  | 0.203131 |
| <i>Arl13a</i>        | chrX:134187500-134208028  | 0.2519 | 0.3188 | 0.3402  | 0.484289 |
| <i>Btk</i>           | chrX:134542335-134583570  | 0.0313 | 0.1005 | 1.6811  | 0.218831 |
| <i>Gm15038</i>       | chrX:136998041-136998337  | 0.4701 | 1.1856 | 1.3345  | 0.196785 |
| <i>Tro</i>           | chrX:150645303-150657583  | 0.0286 | 0.0433 | 0.5976  | 0.598725 |
| <i>Phex</i>          | chrX:157162074-157415312  | 0.0592 | 0.0415 | -0.5129 | 0.598668 |
| <i>Asb11</i>         | chrX:164436993-164459170  | 0.0787 | 0.1945 | 1.3058  | 0.299016 |
| <i>C1qtnf3</i>       | chr15:10952331-10980150   | 0.0448 | 0.1804 | 2.0094  | 0.042878 |
| <i>Angpt1</i>        | chr15:42424726-42676977   | 0.0434 | 0.0914 | 1.0733  | 0.296970 |
| <i>Gm22488</i>       | chr15:58146615-58146742   | 3.3824 | 5.6585 | 0.7424  | 0.385705 |
| <i>Gm22106</i>       | chr15:73729163-73729290   | 1.7755 | 2.4679 | 0.4751  | 0.618879 |
| <i>Abcd2</i>         | chr15:91145883-91191807   | 0.0781 | 0.0836 | 0.0985  | 0.876954 |
| <i>Rapgef3</i>       | chr15:97744769-97767972   | 0.0282 | 0.0355 | 0.3341  | 0.829403 |
| <i>Gm15512</i>       | chr14:33365950-33370143   | 0.0872 | 0.1553 | 0.8332  | 0.434338 |
| <i>Trav7d-3</i>      | chr14:52744248-52744839   | 1.0032 | 1.0120 | 0.0126  | 0.984226 |
| <i>Trav7d-4</i>      | chr14:52769752-52770390   | 0.7213 | 0.7385 | 0.0340  | 0.963524 |

|                      |                           |        |        |         |          |
|----------------------|---------------------------|--------|--------|---------|----------|
| <i>Trav14d-1</i>     | chr14:52855613-52856165   | 0.7463 | 0.9819 | 0.3958  | 0.601091 |
| <i>Traj61</i>        | chr14:54155004-54155076   | 2.6930 | 4.9024 | 0.8643  | 0.525229 |
| <i>Traj55</i>        | chr14:54161438-54161501   | 6.6386 | 7.0358 | 0.0838  | 0.882299 |
| <i>Mir687</i>        | chr14:73206762-73206851   | 2.3680 | 5.3801 | 1.1840  | 0.253535 |
| <i>Ccdc122</i>       | chr14:77036771-77112257   | 0.0984 | 0.2592 | 1.3968  | 0.025073 |
| <i>Scel</i>          | chr14:103513340-103613346 | 0.0640 | 0.0972 | 0.6038  | 0.603518 |
| <i>Gm15425</i>       | chr17:8564257-8568860     | 0.0590 | 0.1440 | 1.2868  | 0.338874 |
| <i>Vmn2r-ps121</i>   | chr17:19453324-19454522   | 0.2741 | 0.3691 | 0.4295  | 0.707629 |
| <i>Pi16</i>          | chr17:29318876-29329413   | 0.0805 | 0.1667 | 1.0511  | 0.326911 |
| <i>Glp1r</i>         | chr17:30901866-30936510   | 0.1041 | 0.2757 | 1.4052  | 0.399311 |
| <i>Ephx3</i>         | chr17:32183769-32189549   | 0.0457 | 0.0975 | 1.0927  | 0.498029 |
| <i>Gm25744</i>       | chr17:34952012-34952075   | 6.1612 | 7.8653 | 0.3523  | 0.476724 |
| <i>Gm9840</i>        | chr17:35935461-35935963   | 0.4846 | 0.7763 | 0.6798  | 0.462240 |
| <i>Sema6b</i>        | chr17:56123084-56140343   | 0.0844 | 0.1249 | 0.5666  | 0.371582 |
| <i>C3</i>            | chr17:57203969-57228136   | 0.0443 | 0.0968 | 1.1262  | 0.313206 |
| <i>Gm10343</i>       | chr16:10801368-10801716   | 1.4948 | 1.3200 | -0.1793 | 0.574715 |
| <i>Fgd4</i>          | chr16:16416916-16600549   | 0.0153 | 0.0202 | 0.4007  | 0.709247 |
| <i>Igll1</i>         | chr16:16860670-16863985   | 0.0001 | 0.1474 | 10.5260 | 0.355918 |
| <i>Tctex1d2</i>      | chr16:32419701-32429099   | 0.1456 | 0.3556 | 1.2879  | 0.075646 |
| <i>Cd80</i>          | chr16:38458932-38486933   | 0.1235 | 0.2504 | 1.0199  | 0.245578 |
| <i>Ccdc80</i>        | chr16:45093401-45127924   | 0.0001 | 0.0766 | 9.5815  | 0.251753 |
| <i>Gm23513</i>       | chr16:52105014-52105147   | 1.7139 | 3.0467 | 0.8300  | 0.340875 |
| <i>Olfr172</i>       | chr16:58760151-58761240   | 0.3616 | 0.5244 | 0.5362  | 0.252073 |
| <i>Olfr173</i>       | chr16:58796778-58797942   | 0.2707 | 0.4445 | 0.7158  | 0.429866 |
| <i>Epha3</i>         | chr16:63543537-63864158   | 0.0149 | 0.0461 | 1.6317  | 0.395971 |
| <i>Sema4c</i>        | chr1:36548641-36558349    | 0.0337 | 0.0526 | 0.6432  | 0.661456 |
| <i>Gm16107</i>       | chr1:52873136-52873998    | 0.2777 | 0.5123 | 0.8833  | 0.279849 |
| <i>Ccdc150</i>       | chr1:54250682-54368727    | 0.0742 | 0.1216 | 0.7124  | 0.335988 |
| <i>4930558J18Rik</i> | chr1:57359221-57377504    | 0.0852 | 0.1484 | 0.7993  | 0.544203 |
| <i>Slc11a1</i>       | chr1:74375202-74386062    | 0.0848 | 0.1053 | 0.3127  | 0.756851 |
| <i>Col4a4</i>        | chr1:82452557-82586849    | 0.0386 | 0.0628 | 0.7014  | 0.370593 |
| <i>Gm15433</i>       | chr1:84963668-84964559    | 0.0945 | 0.2918 | 1.6262  | 0.417284 |
| <i>Gm10552</i>       | chr1:85604084-85611896    | 0.2848 | 0.5061 | 0.8292  | 0.231706 |
| <i>Espnl</i>         | chr1:91322074-91348306    | 0.0644 | 0.0645 | 0.0037  | 0.995570 |
| <i>Klhl30</i>        | chr1:91351015-91362416    | 0.0892 | 0.0842 | -0.0821 | 0.943580 |
| <i>Cacna1e</i>       | chr1:154392518-154725920  | 0.0149 | 0.0366 | 1.3026  | 0.296647 |
| <i>Lhx4</i>          | chr1:155698035-155742120  | 0.0284 | 0.0627 | 1.1446  | 0.244482 |
| <i>Selp</i>          | chr1:164115263-164150026  | 0.0746 | 0.1329 | 0.8338  | 0.026043 |
| <i>Gm6286</i>        | chr1:166945596-166946358  | 0.4816 | 0.7494 | 0.6380  | 0.143968 |
| <i>NA</i>            | chr1:170277375-170285662  | 0.0861 | 0.2540 | 1.5610  | 0.232738 |
| <i>Mixl1</i>         | chr1:180693042-180697034  | 0.1190 | 0.1856 | 0.6406  | 0.415334 |
| <i>Gm23940</i>       | chr19:3490308-3490413     | 3.0096 | 3.5497 | 0.2381  | 0.848944 |
| <i>Lgals12</i>       | chr19:7596659-7607193     | 0.1247 | 0.1927 | 0.6276  | 0.377975 |
| <i>Cyp17a1</i>       | chr19:46667164-46672974   | 0.1323 | 0.2049 | 0.6310  | 0.538173 |
| <i>Mir133a-1</i>     | chr18:10782898-10782985   | 1.5979 | 3.8529 | 1.2698  | 0.463473 |
| <i>Cabyr</i>         | chr18:12741323-12755146   | 0.1519 | 0.2219 | 0.5467  | 0.478918 |
| <i>Gm16558</i>       | chr18:25391800-25392332   | 0.3926 | 1.0715 | 1.4487  | 0.026270 |
| <i>Alpk2</i>         | chr18:65265528-65393888   | 0.0538 | 0.0663 | 0.3014  | 0.419663 |
| <i>Hsbn1l1</i>       | chr18:80229757-80247102   | 0.2814 | 0.3253 | 0.2092  | 0.816396 |
| <i>Gm13216</i>       | chr2:5603570-5604161      | 0.6963 | 0.7833 | 0.1698  | 0.867354 |
| <i>Skida1</i>        | chr2:18040675-18049051    | 0.0695 | 0.1051 | 0.5965  | 0.317523 |
| <i>Gm14487</i>       | chr2:30534728-30539022    | 0.0916 | 0.2514 | 1.4568  | 0.349482 |
| <i>Gm22516</i>       | chr2:31189690-31189814    | 2.6272 | 2.5433 | -0.0468 | 0.949560 |
| <i>Gm13495</i>       | chr2:51938132-51938669    | 0.7755 | 1.0256 | 0.4033  | 0.263241 |
| <i>Gm13574</i>       | chr2:59991950-59992344    | 0.8383 | 1.6405 | 0.9686  | 0.136813 |
| <i>Nutm1</i>         | chr2:112247947-112259291  | 0.0949 | 0.1443 | 0.6051  | 0.498163 |
| <i>A430105I19Rik</i> | chr2:118754157-118762661  | 0.0338 | 0.1006 | 1.5728  | 0.267658 |
| <i>Kcnp3</i>         | chr2:127456497-127522094  | 0.0476 | 0.1671 | 1.8120  | 0.187417 |
| <i>Gm17374</i>       | chr2:140152042-140153532  | 2.4695 | 4.1653 | 0.7542  | 0.322296 |
| <i>Dzank1</i>        | chr2:144470556-144527414  | 0.0224 | 0.0716 | 1.6741  | 0.203042 |
| <i>Dnmt3bos</i>      | chr2:153648689-153650286  | 0.3394 | 0.7223 | 1.0897  | 0.247296 |
| <i>Gm20637</i>       | chr2:155546384-155546846  | 0.4570 | 1.0720 | 1.2301  | 0.165098 |
| <i>Gm11447</i>       | chr2:160845612-160846470  | 0.5488 | 0.5381 | -0.0284 | 0.961434 |
| <i>Tubb1</i>         | chr2:174450694-174457882  | 0.1975 | 0.2756 | 0.4812  | 0.434694 |
| <i>Gm14306</i>       | chr2:176670521-176719085  | 0.0536 | 0.1099 | 1.0358  | 0.428143 |
| <i>NA</i>            | chr3:51906986-51908816    | 0.2166 | 0.2235 | 0.0450  | 0.942079 |
| <i>P2ry12</i>        | chr3:59216270-59262831    | 0.1385 | 0.1931 | 0.4793  | 0.449744 |
| <i>5330417C22Rik</i> | chr3:108455693-108536526  | 0.0661 | 0.0677 | 0.0346  | 0.959476 |
| <i>Gm15551</i>       | chr3:126667328-126669032  | 0.5940 | 1.4483 | 1.2858  | 0.272909 |
| <i>Gm15460</i>       | chr3:137905008-137905399  | 0.1973 | 1.1269 | 2.5137  | 0.045561 |
| <i>mt-Ta</i>         | chrM:5017-5086            | 4.5777 | 3.4911 | -0.3909 | 0.716937 |

|                      |                          |        |        |         |          |
|----------------------|--------------------------|--------|--------|---------|----------|
| <i>Penk</i>          | chr4:4133530-4138819     | 0.0729 | 0.4884 | 2.7442  | 0.178576 |
| <i>Fam110b</i>       | chr4:5644089-6108223     | 0.0276 | 0.0498 | 0.8516  | 0.240796 |
| <i>Lrrc69</i>        | chr4:14623619-14796060   | 0.1569 | 0.3308 | 1.0758  | 0.376189 |
| <i>Gm24607</i>       | chr4:22396569-22396702   | 1.9113 | 3.4716 | 0.8611  | 0.300676 |
| <i>Aqp7</i>          | chr4:41033073-41048139   | 0.0756 | 0.2088 | 1.4655  | 0.163191 |
| <i>Gm12503</i>       | chr4:44092631-44109311   | 0.0403 | 0.1713 | 2.0879  | 0.051837 |
| <i>Orm1</i>          | chr4:63344559-63348163   | 0.1505 | 0.8088 | 2.4261  | 0.062201 |
| <i>Tlr4</i>          | chr4:66827583-66930284   | 0.0678 | 0.0702 | 0.0483  | 0.948783 |
| <i>Eqtn</i>          | chr4:94907266-94928843   | 0.1744 | 0.5627 | 1.6898  | 0.188465 |
| <i>4930551L18Rik</i> | chr4:95089082-95091419   | 0.0498 | 0.2934 | 2.5581  | 0.393890 |
| <i>Gm12788</i>       | chr4:98352426-98352734   | 0.2250 | 0.6698 | 1.5736  | 0.495223 |
| <i>Gm12795</i>       | chr4:101362176-101362890 | 0.6356 | 0.7889 | 0.3116  | 0.635089 |
| <i>BC055111</i>      | chr4:106590908-106617241 | 0.1191 | 0.2218 | 0.8964  | 0.383336 |
| <i>NA</i>            | chr4:111807357-111808426 | 0.2858 | 0.3800 | 0.4113  | 0.655539 |
| <i>Ermap</i>         | chr4:119175456-119190011 | 0.0801 | 0.0872 | 0.1231  | 0.791043 |
| <i>Gm25604</i>       | chr4:126860979-126861112 | 2.7052 | 4.4653 | 0.7230  | 0.430041 |
| <i>Fndc5</i>         | chr4:129136998-129144593 | 0.1479 | 0.1211 | -0.2886 | 0.680612 |
| <i>Asap3</i>         | chr4:136206364-136245216 | 0.0377 | 0.0572 | 0.6020  | 0.656244 |
| <i>Padi4</i>         | chr4:140745864-140774236 | 0.0553 | 0.0538 | -0.0383 | 0.969892 |
| <i>Gm13080</i>       | chr4:143611657-143612077 | 0.3550 | 0.5358 | 0.5938  | 0.703770 |

Supplementary Table 7: Analysis of RNA-seq data from WT and cDKO Tconv cells.

| Associated Gene Name | Coordinates Mus musculus Dec 2011 | cDKO Average FPKM | WT Average FPKM | WT / cDKO Log2 Fold Change | p-value  |
|----------------------|-----------------------------------|-------------------|-----------------|----------------------------|----------|
| <i>Ddx3y</i>         | chrY:1260714-1286613              | 65.4593           | 0.0374          | -10.7746                   | 0.000001 |
| <i>Kdm5d</i>         | chrY:897787-943811                | 31.7559           | 0.0185          | -10.7458                   | 0.000055 |
| <i>Uty</i>           | chrY:1096860-1245759              | 12.5073           | 0.0119          | -10.0363                   | 0.000000 |
| <i>Eij2s3y</i>       | chrY:1010542-1028847              | 30.3897           | 0.0122          | -11.2772                   | 0.002814 |
| <i>Tsix</i>          | chrX:103431516-103484957          | 0.0609            | 14.0584         | 7.8497                     | 0.000105 |
| <i>Gm26992</i>       | chrX:103422009-103481705          | 0.1119            | 31.1044         | 8.1193                     | 0.000143 |
| <i>Xist</i>          | chrX:103460374-103483217          | 0.0440            | 39.3345         | 9.8031                     | 0.000014 |
| <i>Kdm6a</i>         | chrX:18162574-18279936            | 18.3068           | 28.6074         | 0.6440                     | 0.000196 |
| <i>Ddit4</i>         | chr10:59949674-59951770           | 56.2957           | 35.2972         | -0.6735                    | 0.000404 |
| <i>Gpr83</i>         | chr9:14860209-14870789            | 7.0624            | 4.4120          | -0.6787                    | 0.000582 |
| <i>a</i>             | chr2:154791401-155051012          | 15.6605           | 9.2326          | -0.7623                    | 0.000010 |
| <i>Rgs3</i>          | chr4:62559846-62703018            | 8.6919            | 6.1921          | -0.4892                    | 0.000181 |
| <i>Igfbp4</i>        | chr11:99041243-99054392           | 182.4541          | 138.1599        | -0.4012                    | 0.000374 |
| <i>Gm9522</i>        | chr15:39180510-39181441           | 7.3217            | 2.2636          | -1.6935                    | 0.006444 |
| <i>Rell1</i>         | chr5:63908895-63968905            | 1.9873            | 4.0615          | 1.0312                     | 0.001556 |
| <i>H2-Eb1</i>        | chr17:34305882-34316199           | 12.4354           | 31.1959         | 1.3269                     | 0.019013 |
| <i>Gm20417</i>       | chr19:5797561-5798549             | 774.7319          | 1212.2415       | 0.6459                     | 0.006629 |
| <i>Kdm5c</i>         | chrX:152233019-152274535          | 24.5214           | 34.1855         | 0.4793                     | 0.001204 |
| <i>Fus</i>           | chr7:127967456-127982368          | 10.9863           | 17.5196         | 0.6733                     | 0.003678 |
| <i>mt-Nd4</i>        | chrM:10166-11544                  | 37.4131           | 68.4771         | 0.8721                     | 0.003912 |
| <i>Themis2</i>       | chr4:132781842-132796387          | 1.0162            | 2.3104          | 1.1849                     | 0.000341 |
| <i>Comm10</i>        | chr18:46958861-47087992           | 12.8509           | 8.1612          | -0.6550                    | 0.000109 |
| <i>Drc1</i>          | chr5:30281387-30366708            | 11.2098           | 6.0276          | -0.8951                    | 0.001533 |
| <i>Wdfy4</i>         | chr14:32959546-33185508           | 0.7504            | 1.8764          | 1.3222                     | 0.017952 |
| <i>Srf</i>           | chr17:46546838-46556162           | 31.6270           | 24.3407         | -0.3778                    | 0.000876 |
| <i>Tmem259</i>       | chr10:79974947-79984330           | 37.4108           | 29.6103         | -0.3374                    | 0.000442 |
| <i>Il4ra</i>         | chr7:125552281-125579472          | 107.8906          | 87.6872         | -0.2991                    | 0.000480 |
| <i>Snord17</i>       | chr2:144265978-144266216          | 1697.3754         | 1104.6940       | -0.6197                    | 0.004020 |
| <i>Fbx14</i>         | chr6:119479667-119483886          | 49.5016           | 40.0250         | -0.3066                    | 0.000174 |
| <i>Aim2</i>          | chr1:173350878-173466040          | 13.2524           | 18.3848         | 0.4723                     | 0.001178 |
| <i>Malat1</i>        | chr19:5795689-5802672             | 1710.5370         | 2385.1345       | 0.4796                     | 0.009961 |
| <i>Ppp1r12c</i>      | chr7:4481519-4501680              | 41.6634           | 33.9635         | -0.2948                    | 0.000865 |
| <i>Hmgcs1</i>        | chr13:119690461-119708086         | 38.5547           | 24.2985         | -0.6660                    | 0.007593 |
| <i>Vcpip1</i>        | chr1:9718621-9748382              | 10.5589           | 14.9968         | 0.5062                     | 0.007493 |
| <i>Ccdc171</i>       | chr4:83525544-83864670            | 4.5795            | 6.3450          | 0.4704                     | 0.000112 |
| <i>Palmd2Akap2</i>   | chr4:57568178-57896982            | 2.3877            | 1.5937          | -0.5833                    | 0.001090 |
| <i>Akap2</i>         | chr4:57717656-57896984            | 2.4798            | 1.6660          | -0.5738                    | 0.000959 |
| <i>Neat1</i>         | chr19:5824707-5845478             | 12.8324           | 19.0548         | 0.5704                     | 0.020717 |
| <i>Prpf19</i>        | chr19:10888155-10909559           | 19.4059           | 14.4133         | -0.4291                    | 0.003202 |
| <i>Mknl2</i>         | chr10:80665331-80671976           | 129.4449          | 108.2955        | -0.2574                    | 0.000422 |
| <i>mt-Nd1</i>        | chrM:2750-3707                    | 465.1625          | 729.8050        | 0.6498                     | 0.005904 |
| <i>Bmf</i>           | chr2:118528756-118549687          | 2.8844            | 1.5900          | -0.8593                    | 0.002881 |
| <i>Saraf</i>         | chr8:34154562-34170845            | 312.3110          | 265.6778        | -0.2333                    | 0.000115 |
| <i>Mepce</i>         | chr5:137781905-137786715          | 43.1681           | 35.6284         | -0.2769                    | 0.000978 |
| <i>Adrbk2</i>        | chr5:112910477-113015514          | 0.4066            | 1.0050          | 1.3055                     | 0.021961 |
| <i>Fgl2</i>          | chr5:21372641-21378374            | 1.3251            | 3.3123          | 1.3218                     | 0.039484 |
| <i>Zbtb7b</i>        | chr3:89377643-89394776            | 56.8854           | 45.4417         | -0.3240                    | 0.003798 |
| <i>Hid1</i>          | chr11:115347706-115367756         | 10.1227           | 7.5200          | -0.4288                    | 0.002845 |
| <i>Agap2</i>         | chr10:127078906-127093169         | 34.9848           | 29.8597         | -0.2285                    | 0.000218 |
| <i>Rgs14</i>         | chr13:55369731-55384687           | 72.6229           | 58.7221         | -0.3065                    | 0.002019 |
| <i>B430218F22Rik</i> | chr13:118386629-118388124         | 9.4576            | 5.7767          | -0.7112                    | 0.003644 |
| <i>Gm17509</i>       | chr13:117218700-117221075         | 22.9529           | 17.5398         | -0.3880                    | 0.002136 |
| <i>Dnajb1</i>        | chr8:83608174-83611902            | 57.6387           | 41.0991         | -0.4879                    | 0.024347 |
| <i>Crebzf</i>        | chr7:90442728-90447717            | 69.4290           | 59.4924         | -0.2228                    | 0.001999 |
| <i>Lypla2</i>        | chr4:135968223-135972626          | 38.6412           | 31.5169         | -0.2940                    | 0.001201 |
| <i>Hmgb2</i>         | chr8:57511842-57515999            | 2.5951            | 4.3850          | 0.7568                     | 0.003476 |
| <i>NA</i>            | chr1:6214611-6215292              | 12.8585           | 7.4562          | -0.7862                    | 0.004582 |
| <i>Jmjd6</i>         | chr11:116837431-116843449         | 24.9955           | 19.9204         | -0.3274                    | 0.006376 |
| <i>1810049J17Rik</i> | chr15:12321437-12321899           | 78.7317           | 58.9478         | -0.4175                    | 0.004320 |
| <i>Isg15</i>         | chr4:156199423-156200818          | 6.1812            | 11.2447         | 0.8633                     | 0.003244 |
| <i>Gramd1a</i>       | chr7:31130126-31151050            | 284.1960          | 233.8635        | -0.2812                    | 0.005118 |
| <i>Tmem229b</i>      | chr12:78961794-79007627           | 29.2393           | 24.5853         | -0.2501                    | 0.000597 |
| <i>mt-Nd2</i>        | chrM:3913-4951                    | 39.3326           | 84.3668         | 1.1009                     | 0.005833 |
| <i>Irf2</i>          | chr8:46739744-46847458            | 7.6917            | 11.1801         | 0.5396                     | 0.007179 |
| <i>Slc9a9</i>        | chr9:94669908-95230445            | 12.8620           | 18.2027         | 0.5010                     | 0.019507 |
| <i>Adamts14</i>      | chr10:61197111-61273438           | 3.3314            | 2.4035          | -0.4710                    | 0.000646 |
| <i>Coro1a</i>        | chr7:126699772-126707787          | 702.8962          | 590.4325        | -0.2515                    | 0.002386 |
| <i>Bub3</i>          | chr7:131560390-131571898          | 53.8878           | 44.3970         | -0.2795                    | 0.000715 |
| <i>Asb2</i>          | chr12:103321141-103356001         | 3.0635            | 5.8133          | 0.9241                     | 0.023981 |



|                      |                           |          |          |         |          |
|----------------------|---------------------------|----------|----------|---------|----------|
| <i>Rnf187</i>        | chr11:58932287-58938916   | 88.9781  | 73.9587  | -0.2667 | 0.001751 |
| <i>Vipr1</i>         | chr9:121642715-121672954  | 58.5511  | 49.2117  | -0.2507 | 0.004266 |
| <i>Lrrk2</i>         | chr15:91673174-91816120   | 0.2864   | 0.6105   | 1.0921  | 0.030020 |
| <i>Abcb9</i>         | chr5:124061529-124095798  | 10.7924  | 8.7020   | -0.3106 | 0.002435 |
| <i>Hnrnpa1</i>       | chr15:103240431-103244955 | 9.6483   | 13.1491  | 0.4466  | 0.000445 |
| <i>mt-Nd5</i>        | chrM:11741-13565          | 52.2773  | 74.8416  | 0.5177  | 0.007192 |
| <i>Abhd17a</i>       | chr10:80583648-80590341   | 36.4483  | 27.8565  | -0.3878 | 0.006595 |
| <i>Atp6v0b</i>       | chr4:117884325-117887333  | 28.3249  | 23.6229  | -0.2619 | 0.000001 |
| <i>Tbxa2r</i>        | chr10:81328731-81335171   | 29.6490  | 22.9591  | -0.3689 | 0.006201 |
| <i>Tbc1d15</i>       | chr10:115197876-115251493 | 7.1807   | 10.1177  | 0.4947  | 0.012008 |
| <i>Trim25</i>        | chr11:88999375-89020293   | 13.3876  | 18.2642  | 0.4481  | 0.019161 |
| <i>Ezh2</i>          | chr6:47530273-47595341    | 5.8592   | 7.6792   | 0.3903  | 0.003838 |
| <i>Trim28</i>        | chr7:13024151-13031035    | 69.2395  | 59.8082  | -0.2113 | 0.001190 |
| <i>Chtf8</i>         | chr8:106883862-106893601  | 60.4198  | 52.3858  | -0.2058 | 0.000104 |
| <i>Arrdc3</i>        | chr13:80883383-80896035   | 10.1318  | 15.3199  | 0.5965  | 0.025092 |
| <i>Dnajc6</i>        | chr4:101496647-101642799  | 5.1496   | 3.7632   | -0.4525 | 0.008874 |
| <i>Gm20645</i>       | chr11:23736846-23740357   | 4.4232   | 6.1378   | 0.4726  | 0.001329 |
| <i>Orai2</i>         | chr5:136147463-136170656  | 48.1667  | 40.9174  | -0.2353 | 0.001756 |
| <i>Mcm2</i>          | chr6:88883474-88898780    | 30.1934  | 24.7065  | -0.2893 | 0.003318 |
| <i>Zfp771</i>        | chr7:127244525-127254803  | 6.9841   | 4.5373   | -0.6222 | 0.001394 |
| <i>Anp32e</i>        | chr3:95929245-95947390    | 12.9931  | 17.4040  | 0.4217  | 0.003938 |
| <i>Ctnnb1</i>        | chr9:120929215-120960507  | 93.8645  | 79.9353  | -0.2317 | 0.003616 |
| <i>A1467606</i>      | chr7:127091435-127094049  | 188.2066 | 160.4395 | -0.2303 | 0.003303 |
| <i>Tle1</i>          | chr4:72117141-72200919    | 1.1405   | 1.7248   | 0.5967  | 0.004255 |
| <i>Ccnd1</i>         | chr7:144929930-144939869  | 1.8320   | 3.0145   | 0.7185  | 0.011354 |
| <i>Etaa1</i>         | chr11:17938755-17953875   | 5.4417   | 7.2930   | 0.4225  | 0.001042 |
| <i>Ccdc88a</i>       | chr11:29373657-29510808   | 0.4758   | 0.8314   | 0.8052  | 0.005310 |
| <i>Zfp69</i>         | chr4:120930136-120951699  | 1.8080   | 3.8234   | 1.0804  | 0.068797 |
| <i>Mbtd1</i>         | chr11:93885851-93946985   | 4.3322   | 5.5546   | 0.3586  | 0.004921 |
| <i>Nup62</i>         | chr7:44816087-44830809    | 16.0132  | 12.9361  | -0.3079 | 0.001340 |
| <i>Tsc22d3</i>       | chrX:140539527-140600659  | 109.5629 | 82.8707  | -0.4028 | 0.023505 |
| <i>Sifn10-ps</i>     | chr11:83028129-83040042   | 4.4939   | 6.5005   | 0.5326  | 0.010597 |
| <i>Cbx8</i>          | chr11:119036304-119040969 | 7.5719   | 5.0559   | -0.5827 | 0.028958 |
| <i>Idh2</i>          | chr7:80094845-80115392    | 35.2894  | 28.7821  | -0.2941 | 0.005222 |
| <i>Agpat2</i>        | chr2:26593056-26604417    | 6.2625   | 4.4574   | -0.4905 | 0.000335 |
| <i>Itgb3</i>         | chr11:104607999-104670476 | 56.7766  | 46.2850  | -0.2948 | 0.007901 |
| <i>A930038B10Rik</i> | chr14:34759401-34770553   | 1.0764   | 0.5689   | -0.9200 | 0.024864 |
| <i>Enthd2</i>        | chr11:120090530-120098731 | 13.5639  | 11.0427  | -0.2967 | 0.000910 |
| <i>Cdipt</i>         | chr7:126976348-126980499  | 102.8314 | 87.1523  | -0.2387 | 0.001157 |
| <i>Gm10642</i>       | chr9:70656250-70657860    | 15.7007  | 11.5650  | -0.4411 | 0.006796 |
| <i>Rpl10a</i>        | chr17:28328470-28331032   | 31.9790  | 26.7714  | -0.2564 | 0.001180 |
| <i>Tubb4b</i>        | chr2:25222159-25224702    | 42.9646  | 35.1190  | -0.2909 | 0.003346 |
| <i>Ddx6</i>          | chr9:44604891-44640731    | 38.4228  | 49.5947  | 0.3682  | 0.015506 |
| <i>Itgav</i>         | chr2:83724396-83806916    | 5.3863   | 8.0735   | 0.5839  | 0.031336 |
| <i>NA</i>            | chr19:47894597-47919299   | 32.0318  | 26.4235  | -0.2777 | 0.008940 |
| <i>Pml</i>           | chr9:58218075-58249786    | 9.7580   | 14.4593  | 0.5673  | 0.044516 |
| <i>Rab1b</i>         | chr19:5099206-5106996     | 61.5185  | 51.6590  | -0.2520 | 0.001672 |
| <i>Erdr1</i>         | chrY:90784737-90816464    | 3.3067   | 6.4405   | 0.9618  | 0.007335 |
| <i>Ktn1</i>          | chr14:47663755-47736563   | 17.8527  | 21.8509  | 0.2916  | 0.001507 |
| <i>Ndel1</i>         | chr11:68821433-68871858   | 23.0546  | 19.6339  | -0.2317 | 0.000054 |
| <i>Rabac1</i>        | chr7:24969749-24972728    | 140.3759 | 115.0145 | -0.2875 | 0.004519 |
| <i>Ccm2</i>          | chr11:6546886-6596744     | 76.2983  | 67.7998  | -0.1704 | 0.000068 |
| <i>Gm20512</i>       | chr7:19715015-19721731    | 8.9625   | 5.2128   | -0.7818 | 0.001684 |
| <i>Relt</i>          | chr7:100845847-100863446  | 19.1808  | 14.8736  | -0.3669 | 0.009929 |
| <i>Hspa8</i>         | chr9:40800983-40805200    | 127.8486 | 92.8106  | -0.4621 | 0.026987 |
| <i>Pou2f2</i>        | chr7:25091908-25159922    | 0.8040   | 1.6897   | 1.0715  | 0.033791 |
| <i>Srrm2</i>         | chr17:23803186-23824739   | 53.5433  | 76.6845  | 0.5182  | 0.053831 |
| <i>Gjpt1</i>         | chr6:87042845-87092197    | 7.5428   | 9.6805   | 0.3600  | 0.007677 |
| <i>Itgax</i>         | chr7:128129546-128150656  | 1.5185   | 2.8933   | 0.9301  | 0.038916 |
| <i>Actr2</i>         | chr11:20062303-20112913   | 47.7799  | 61.8583  | 0.3726  | 0.006498 |
| <i>Rnf40</i>         | chr7:127588697-127603605  | 51.9246  | 45.4295  | -0.1928 | 0.002354 |
| <i>Rrp9</i>          | chr9:106475962-106485424  | 23.6091  | 19.5978  | -0.2687 | 0.001850 |
| <i>Gpkow</i>         | chrX:7697130-7710262      | 8.2771   | 11.8758  | 0.5208  | 0.014923 |
| <i>Slc25a45</i>      | chr19:5877807-5885766     | 27.8359  | 23.7899  | -0.2266 | 0.000079 |
| <i>Ggt1</i>          | chr10:75561603-75586200   | 6.7019   | 4.8386   | -0.4700 | 0.023592 |
| <i>Cnn2</i>          | chr10:79988583-79996062   | 331.2183 | 274.3388 | -0.2718 | 0.007576 |
| <i>Bcap29</i>        | chr12:31595353-31634658   | 5.8167   | 8.2865   | 0.5105  | 0.003594 |
| <i>Lman2</i>         | chr13:55343832-55362783   | 37.6602  | 31.9746  | -0.2361 | 0.005023 |
| <i>Cxcr4</i>         | chr1:128588198-128592293  | 39.3399  | 25.4737  | -0.6270 | 0.033823 |
| <i>Pwp2</i>          | chr10:78170909-78185149   | 21.4861  | 17.7414  | -0.2763 | 0.005569 |
| <i>Ampd1</i>         | chr3:103074013-103099714  | 10.2025  | 7.1368   | -0.5156 | 0.023869 |

|                      |                           |          |           |         |          |
|----------------------|---------------------------|----------|-----------|---------|----------|
| <i>Tbc1d16</i>       | chr11:119143044-119228499 | 7.9072   | 6.0951    | -0.3755 | 0.013156 |
| <i>Dusp7</i>         | chr9:106368631-106375724  | 19.0405  | 15.3304   | -0.3127 | 0.007534 |
| <i>Snn</i>           | chr16:11066297-11074983   | 9.7705   | 13.7328   | 0.4911  | 0.014582 |
| <i>Tgm2</i>          | chr2:158116401-158146436  | 0.8814   | 1.4243    | 0.6924  | 0.000311 |
| <i>Snap29</i>        | chr16:17406002-17430826   | 11.9537  | 15.3291   | 0.3588  | 0.003034 |
| <i>Cd83</i>          | chr13:43785106-43803130   | 2.6752   | 5.6763    | 1.0853  | 0.036172 |
| <i>Nfatc1</i>        | chr18:80606204-80713071   | 9.1205   | 13.4499   | 0.5604  | 0.053556 |
| <i>NA</i>            | chr9:106883984-106887000  | 33.3064  | 28.1274   | -0.2438 | 0.003784 |
| <i>Lfng</i>          | chr5:140607340-140615543  | 204.4916 | 178.2084  | -0.1985 | 0.009399 |
| <i>Prr7</i>          | chr13:55464266-55473155   | 11.9252  | 8.2574    | -0.5302 | 0.008970 |
| <i>Mogs</i>          | chr6:83115495-83118898    | 48.1038  | 41.5678   | -0.2107 | 0.002717 |
| <i>Irf3</i>          | chr7:44997647-45002848    | 62.6757  | 55.0003   | -0.1885 | 0.000911 |
| <i>Sit1</i>          | chr4:43482080-43483734    | 88.4241  | 69.9835   | -0.3374 | 0.009215 |
| <i>Heatr2</i>        | chr5:139150222-139186510  | 11.1550  | 8.9301    | -0.3210 | 0.004610 |
| <i>Ldb1</i>          | chr19:46032592-46045214   | 133.0500 | 117.7617  | -0.1761 | 0.001374 |
| <i>Ryr3</i>          | chr2:112631354-113217096  | 0.2560   | 0.4626    | 0.8535  | 0.026080 |
| <i>Fcho2</i>         | chr13:98723406-98815449   | 5.1567   | 7.3504    | 0.5114  | 0.029523 |
| <i>Fem1a</i>         | chr17:56256792-56263608   | 22.4805  | 19.2611   | -0.2230 | 0.007533 |
| <i>Ddost</i>         | chr4:138304729-138312628  | 59.7018  | 51.5997   | -0.2104 | 0.001320 |
| <i>Stat2</i>         | chr10:128270575-128292849 | 15.5794  | 21.0249   | 0.4325  | 0.032808 |
| <i>Sp100</i>         | chr1:85649987-85709998    | 52.7683  | 61.1516   | 0.2127  | 0.001607 |
| <i>Csnk1g2</i>       | chr10:80622779-80640771   | 104.7747 | 91.6534   | -0.1930 | 0.002179 |
| <i>Zfp213</i>        | chr17:23556768-23564226   | 11.1487  | 8.6883    | -0.3597 | 0.005682 |
| <i>Ms4a4b</i>        | chr19:11443552-11463549   | 121.6202 | 151.7131  | 0.3190  | 0.010705 |
| <i>AI504432</i>      | chr3:107039503-107054347  | 15.3700  | 19.1737   | 0.3190  | 0.013544 |
| <i>NA</i>            | chr16:49913192-49915008   | 10.9222  | 14.6670   | 0.4253  | 0.007683 |
| <i>D130020L05Rik</i> | chr12:101082480-101088927 | 18.5311  | 14.8061   | -0.3238 | 0.008334 |
| <i>Scand1</i>        | chr2:156311846-156312704  | 81.1619  | 61.8918   | -0.3911 | 0.020656 |
| <i>Parvg</i>         | chr15:84324025-84342978   | 45.0560  | 38.1795   | -0.2389 | 0.004683 |
| <i>Mlec</i>          | chr5:115142980-115158179  | 96.6093  | 84.1858   | -0.1986 | 0.008644 |
| <i>Mob3a</i>         | chr10:80685255-80701820   | 114.4473 | 97.8922   | -0.2254 | 0.005143 |
| <i>Abcf2</i>         | chr5:24565340-24577467    | 48.1155  | 42.1834   | -0.1898 | 0.000259 |
| <i>Cyth3</i>         | chr5:143622446-143710250  | 5.7845   | 7.8169    | 0.4344  | 0.016375 |
| <i>Ltb</i>           | chr17:35194438-35196320   | 423.8971 | 351.8300  | -0.2688 | 0.013985 |
| <i>Ccdc85b</i>       | chr19:5456788-5457397     | 30.0058  | 22.1380   | -0.4387 | 0.007854 |
| <i>Poldip3</i>       | chr15:83125977-83149384   | 36.2148  | 32.0449   | -0.1765 | 0.002087 |
| <i>Gm16091</i>       | chr8:72147600-72160855    | 28.7850  | 22.4824   | -0.3565 | 0.005970 |
| <i>Gm26561</i>       | chr17:70878077-71393284   | 10.2830  | 13.8374   | 0.4283  | 0.002542 |
| <i>Scyl1</i>         | chr19:5758426-5771401     | 30.5692  | 26.2658   | -0.2189 | 0.001302 |
| <i>Polr3c</i>        | chr3:96711489-96727628    | 16.1762  | 21.0292   | 0.3785  | 0.006288 |
| <i>Fubp1</i>         | chr3:152210457-152236830  | 93.4895  | 78.0534   | -0.2603 | 0.019168 |
| <i>Eif2ak2</i>       | chr17:78852563-78882573   | 10.7962  | 14.7198   | 0.4472  | 0.017748 |
| <i>mt-Rnr1</i>       | chrM:69-1024              | 538.3929 | 1414.5727 | 1.3936  | 0.017200 |
| <i>Paqr7</i>         | chr4:134496696-134510235  | 19.1310  | 16.1368   | -0.2456 | 0.005406 |
| <i>Ppp1r8</i>        | chr4:132826928-132843169  | 27.1435  | 21.9182   | -0.3085 | 0.008267 |
| <i>Ddit3</i>         | chr10:127290773-127296288 | 18.6630  | 23.9981   | 0.3627  | 0.004113 |
| <i>Fcgrt</i>         | chr7:45092992-45103822    | 5.0537   | 3.3576    | -0.5899 | 0.004237 |
| <i>Zdhhc7</i>        | chr8:120081094-120101482  | 18.2448  | 15.2570   | -0.2580 | 0.004466 |
| <i>4632428N05Rik</i> | chr10:60346850-60372684   | 141.3205 | 125.6876  | -0.1691 | 0.006170 |
| <i>Pldb1</i>         | chr6:136612069-136661928  | 1.8722   | 3.3313    | 0.8314  | 0.033953 |
| <i>Tmem189</i>       | chr2:167642607-167689822  | 18.7656  | 16.0419   | -0.2263 | 0.000579 |
| <i>H2-Aa</i>         | chr17:34282743-34287827   | 11.6588  | 25.8342   | 1.1479  | 0.049125 |
| <i>Galnt12</i>       | chr4:47091908-47123070    | 17.7098  | 14.7184   | -0.2669 | 0.000656 |
| <i>Dvl1</i>          | chr4:155847401-155859303  | 23.9012  | 20.4030   | -0.2283 | 0.008136 |
| <i>Patz1</i>         | chr11:3288873-3309083     | 20.5998  | 17.3412   | -0.2484 | 0.010786 |
| <i>Pdlim4</i>        | chr11:54054927-54069014   | 32.5230  | 24.7318   | -0.3951 | 0.026737 |
| <i>Ddx49</i>         | chr8:70292865-70302489    | 19.3616  | 16.4248   | -0.2373 | 0.000913 |
| <i>Pygb</i>          | chr2:150786734-150831758  | 33.3294  | 28.7745   | -0.2120 | 0.005595 |
| <i>Mrpl28</i>        | chr17:26123519-26126613   | 27.6733  | 22.5959   | -0.2924 | 0.001052 |
| <i>Gadd45b</i>       | chr10:80930090-80932204   | 5.8978   | 9.7220    | 0.7211  | 0.035223 |
| <i>Fbxo33</i>        | chr12:59200654-59219725   | 22.7041  | 19.4190   | -0.2255 | 0.005555 |
| <i>AU020206</i>      | chr7:75769761-75782099    | 25.7361  | 44.5689   | 0.7922  | 0.073431 |
| <i>Ptpncap</i>       | chr19:4154605-4156751     | 335.9019 | 269.6475  | -0.3170 | 0.017391 |
| <i>Ocel1</i>         | chr8:71371297-71379361    | 11.3619  | 9.1178    | -0.3174 | 0.021077 |
| <i>Rbm3</i>          | chrX:8138974-8145880      | 34.4648  | 27.7730   | -0.3114 | 0.022838 |
| <i>Smndc1</i>        | chr19:53379213-53390573   | 12.3614  | 15.4296   | 0.3199  | 0.000249 |
| <i>Map2k2</i>        | chr10:81105914-81124697   | 26.9722  | 23.5335   | -0.1968 | 0.000685 |
| <i>Map3k10</i>       | chr7:27656374-27674598    | 4.5527   | 3.5581    | -0.3556 | 0.000891 |
| <i>mt-Nd6</i>        | chrM:13551-14070          | 33.1085  | 45.5830   | 0.4613  | 0.007305 |
| <i>Pabpc1</i>        | chr15:36595660-36608973   | 36.1972  | 46.4339   | 0.3593  | 0.030485 |
| <i>Cul9</i>          | chr17:46500571-46546388   | 0.9208   | 1.3014    | 0.4991  | 0.012423 |

|                      |                           |          |          |         |          |
|----------------------|---------------------------|----------|----------|---------|----------|
| <i>Gbp5</i>          | chr3:142496933-142522344  | 7.7118   | 11.1982  | 0.5381  | 0.036884 |
| <i>Pbdc1</i>         | chrX:105079755-105117090  | 4.5290   | 5.6178   | 0.3108  | 0.000095 |
| <i>Reep3</i>         | chr10:67009188-67096988   | 4.7345   | 6.0849   | 0.3620  | 0.002837 |
| <i>Gm10244</i>       | chr6:39419886-39421294    | 6.3339   | 4.1790   | -0.5999 | 0.004331 |
| <i>Gucd1</i>         | chr10:75351110-75517972   | 21.7060  | 18.9381  | -0.1968 | 0.003571 |
| <i>Cnga1</i>         | chr5:72603695-72642752    | 4.2154   | 3.0156   | -0.4832 | 0.019746 |
| <i>Zfp12</i>         | chr5:143235162-143248834  | 14.6190  | 12.4801  | -0.2282 | 0.004852 |
| <i>Klhl42</i>        | chr6:147091378-147112778  | 20.0885  | 17.1258  | -0.2302 | 0.009243 |
| <i>Gm13807</i>       | chr2:93403546-93417830    | 5.5385   | 8.1690   | 0.5607  | 0.003378 |
| <i>Pycr2</i>         | chr1:180904273-180908087  | 31.0083  | 25.6239  | -0.2752 | 0.005444 |
| <i>Wdr44</i>         | chrX:23693050-23806025    | 4.9930   | 6.2577   | 0.3257  | 0.008906 |
| <i>Cstf1</i>         | chr2:172370680-172382448  | 19.6631  | 16.7218  | -0.2338 | 0.005635 |
| <i>Gnaq</i>          | chr19:16132830-16387463   | 0.7555   | 1.3499   | 0.8373  | 0.047201 |
| <i>Grk6</i>          | chr13:55445333-55460925   | 229.5606 | 204.3791 | -0.1676 | 0.004689 |
| <i>Farsa</i>         | chr8:84856988-84869257    | 21.3129  | 18.5060  | -0.2037 | 0.002257 |
| <i>Rad21</i>         | chr15:51962604-51991760   | 40.8834  | 49.2139  | 0.2676  | 0.007376 |
| <i>Prcc2c</i>        | chr1:162670724-162740556  | 32.2159  | 43.8149  | 0.4436  | 0.061501 |
| <i>H2afj</i>         | chr6:136808247-136810074  | 45.1984  | 35.4407  | -0.3509 | 0.025535 |
| <i>AW549877</i>      | chr15:3982035-3995752     | 17.8859  | 22.0400  | 0.3013  | 0.010256 |
| <i>Cntln</i>         | chr4:84884308-85131921    | 0.6120   | 1.2128   | 0.9867  | 0.044777 |
| <i>Tlr12</i>         | chr4:128615445-128618619  | 4.4427   | 3.1436   | -0.4990 | 0.022072 |
| <i>Sf3b5</i>         | chr10:13008449-13009182   | 53.2658  | 41.3436  | -0.3655 | 0.011985 |
| <i>Atp2b1</i>        | chr10:98915151-99026143   | 24.4003  | 30.7585  | 0.3341  | 0.016939 |
| <i>Dynll1</i>        | chr5:115297109-115300999  | 14.4137  | 11.0102  | -0.3886 | 0.021177 |
| <i>Ank</i>           | chr15:27466676-27594909   | 6.9782   | 9.3426   | 0.4210  | 0.019006 |
| <i>Chd8</i>          | chr14:52198150-52237791   | 21.2815  | 26.5192  | 0.3174  | 0.022856 |
| <i>Decr1</i>         | chr4:15917239-15945507    | 4.0089   | 5.3258   | 0.4098  | 0.005196 |
| <i>Dcun1d2</i>       | chr8:13255962-13288126    | 15.9575  | 12.9018  | -0.3067 | 0.009731 |
| <i>Cyp2s1</i>        | chr7:25802474-25816913    | 5.6339   | 4.1478   | -0.4418 | 0.030383 |
| <i>Slc9a3r1</i>      | chr11:115163340-115181181 | 91.1298  | 79.8818  | -0.1901 | 0.002123 |
| <i>mt-Cytb</i>       | chrM:14144-15288          | 257.3355 | 460.3210 | 0.8390  | 0.010050 |
| <i>Pink1</i>         | chr4:138313408-138326307  | 54.0745  | 40.3902  | -0.4209 | 0.063806 |
| <i>Gpr180</i>        | chr14:118137126-118164232 | 11.3788  | 9.4313   | -0.2708 | 0.000461 |
| <i>Enpp4</i>         | chr17:44096307-44105809   | 10.8239  | 8.5449   | -0.3411 | 0.025503 |
| <i>Bhlhb9</i>        | chrX:135885850-135891081  | 6.4823   | 8.7021   | 0.4249  | 0.016242 |
| <i>5530601H04Rik</i> | chrX:105037196-105079609  | 2.0682   | 2.7079   | 0.3888  | 0.004497 |
| <i>Tbc1d14</i>       | chr5:36490603-36593276    | 4.9171   | 6.1935   | 0.3329  | 0.014805 |
| <i>Dedd2</i>         | chr7:25202839-25219859    | 42.5197  | 36.1722  | -0.2333 | 0.008985 |
| <i>Gm15832</i>       | chr1:39547569-39552002    | 5.5880   | 7.8587   | 0.4920  | 0.007247 |
| <i>Mir1893</i>       | chr18:6490563-6490646     | 104.4345 | 70.6618  | -0.5636 | 0.006875 |
| <i>Gm26566</i>       | chr4:88721804-88722842    | 26.7898  | 20.5367  | -0.3835 | 0.016191 |
| <i>H2-D1</i>         | chr17:35262729-35267499   | 825.6620 | 698.3160 | -0.2417 | 0.026660 |
| <i>Kcnn4</i>         | chr7:24370262-24385209    | 144.2102 | 125.1700 | -0.2043 | 0.014733 |
| <i>Tbc1d9</i>        | chr8:83165351-83272934    | 0.4955   | 1.0275   | 1.0522  | 0.053543 |
| <i>Trim59</i>        | chr3:69035287-69044755    | 13.0041  | 16.4142  | 0.3360  | 0.012167 |
| <i>Slain1</i>        | chr14:103650227-103704907 | 29.4270  | 25.9398  | -0.1820 | 0.000365 |
| <i>Ppp1r9b</i>       | chr11:94991034-95006899   | 55.6476  | 47.9292  | -0.2154 | 0.013148 |
| <i>A1480526</i>      | chr5:123133722-123141666  | 8.7934   | 11.1909  | 0.3478  | 0.015490 |
| <i>Mcoln3</i>        | chr3:146117458-146141806  | 3.8915   | 2.9106   | -0.4190 | 0.002919 |
| <i>Gsk3b</i>         | chr16:38089000-38246084   | 8.5572   | 10.6349  | 0.3136  | 0.010776 |
| <i>Mex3b</i>         | chr7:82867332-82871563    | 13.7729  | 11.6938  | -0.2361 | 0.000575 |
| <i>Ubash3a</i>       | chr17:31207872-31242202   | 65.6822  | 58.2722  | -0.1727 | 0.007898 |
| <i>Ctsd</i>          | chr7:142371147-142388038  | 156.6150 | 138.1847 | -0.1806 | 0.010281 |
| <i>Nol9</i>          | chr4:152039320-152061494  | 17.8178  | 15.6004  | -0.1917 | 0.001486 |
| <i>Dhx9</i>          | chr1:153455757-153487660  | 29.9488  | 35.8183  | 0.2582  | 0.013386 |
| <i>Gm26551</i>       | chr11:51949881-52269514   | 13.9545  | 19.5707  | 0.4880  | 0.055746 |
| <i>Mapk6</i>         | chr9:75369061-75410005    | 8.3610   | 10.2808  | 0.2982  | 0.009815 |
| <i>Tbl3</i>          | chr17:24697948-24707660   | 10.2418  | 8.3723   | -0.2908 | 0.021157 |
| <i>Kif13a</i>        | chr13:46749086-46929718   | 0.9051   | 1.7251   | 0.9305  | 0.083836 |
| <i>Gm26591</i>       | chr6:120033521-120036471  | 2.2429   | 3.4050   | 0.6023  | 0.003968 |
| <i>Dusp16</i>        | chr6:134715472-134792625  | 0.5192   | 0.8429   | 0.6991  | 0.009087 |
| <i>Elavl1</i>        | chr8:4284781-4325100      | 14.1906  | 17.1802  | 0.2758  | 0.006985 |
| <i>Sh3gl1</i>        | chr17:56016752-56036637   | 68.1057  | 57.5440  | -0.2431 | 0.013253 |
| <i>Gart</i>          | chr16:91621185-91646952   | 36.5445  | 32.2754  | -0.1792 | 0.001449 |
| <i>Prep</i>          | chr10:45067205-45158997   | 16.2545  | 13.4274  | -0.2757 | 0.011110 |
| <i>Rhobtb2</i>       | chr14:69784989-69805530   | 21.3414  | 18.6125  | -0.1974 | 0.003884 |
| <i>O610011F06Rik</i> | chr17:25875463-25886007   | 26.3677  | 20.7220  | -0.3476 | 0.010437 |
| <i>Flna</i>          | chrX:74223460-74249820    | 314.7423 | 275.6426 | -0.1914 | 0.020589 |
| <i>Ppm1j</i>         | chr3:104781055-104786018  | 20.7180  | 16.4040  | -0.3368 | 0.026216 |
| <i>Gm26541</i>       | chr10:80681837-80687176   | 59.7203  | 52.5473  | -0.1846 | 0.004551 |
| <i>Mgst2</i>         | chr3:51660359-51682675    | 14.3895  | 17.0440  | 0.2442  | 0.000253 |

|                      |                           |          |          |         |          |
|----------------------|---------------------------|----------|----------|---------|----------|
| <i>Sepn1</i>         | chr4:134537891-134552166  | 0.9707   | 1.5659   | 0.6899  | 0.003160 |
| <i>Tlr7</i>          | chrX:167304928-167330558  | 2.3588   | 3.8540   | 0.7083  | 0.043786 |
| <i>Twf2</i>          | chr9:106203107-106215387  | 96.9150  | 83.7215  | -0.2111 | 0.006465 |
| <i>Gm9887</i>        | chr12:69371834-69372458   | 22.8815  | 16.9327  | -0.4344 | 0.014765 |
| <i>Gm26508</i>       | chr11:119077572-119081865 | 34.3555  | 28.0685  | -0.2916 | 0.014753 |
| <i>Sin3b</i>         | chr8:72723287-72758203    | 31.8273  | 27.3695  | -0.2177 | 0.008935 |
| <i>Minos1</i>        | chr4:139101813-139131113  | 6.3124   | 6.6265   | 0.4506  | 0.020329 |
| <i>Pex11g</i>        | chr8:3457104-3467680      | 5.4587   | 7.3477   | 0.4287  | 0.018306 |
| <i>Adam23</i>        | chr1:63445890-63596515    | 0.2890   | 0.6041   | 1.0637  | 0.048682 |
| <i>Tdrp</i>          | chr8:13952008-13975032    | 38.0221  | 30.6512  | -0.3109 | 0.037609 |
| <i>Gm22489</i>       | chr1:161035849-161035911  | 91.0263  | 135.2647 | 0.5714  | 0.005714 |
| <i>2310036O22Rik</i> | chr8:85026832-85030285    | 168.7675 | 143.1290 | -0.2377 | 0.013388 |
| <i>Nudt16l1</i>      | chr16:4939110-4941020     | 19.9889  | 24.8715  | 0.3153  | 0.000982 |
| <i>Zfp867</i>        | chr11:59461196-59472474   | 4.3049   | 5.5554   | 0.3679  | 0.000348 |
| <i>Abcb1a</i>        | chr5:8660076-8748575      | 2.4230   | 3.7995   | 0.6490  | 0.036736 |
| <i>Abhd8</i>         | chr8:71456699-71463657    | 74.5226  | 64.3312  | -0.2122 | 0.009994 |
| <i>Dusp5</i>         | chr19:53529108-53542431   | 16.9389  | 13.7869  | -0.2970 | 0.014653 |
| <i>Slc7a1</i>        | chr5:148327409-148399904  | 7.2641   | 10.5876  | 0.5435  | 0.056986 |
| <i>Zfp622</i>        | chr15:25984365-25998482   | 30.3320  | 26.2506  | -0.2085 | 0.004403 |
| <i>Msn</i>           | chrX:96096041-96168552    | 85.0894  | 112.2361 | 0.3995  | 0.036562 |
| <i>Ruvbl2</i>        | chr7:45421851-45438096    | 22.6561  | 18.2764  | -0.3099 | 0.014893 |
| <i>Mpnd</i>          | chr17:56005710-56016790   | 33.8640  | 28.8647  | -0.2304 | 0.008876 |
| <i>Ifi203</i>        | chr1:173920406-173942672  | 32.0324  | 37.2912  | 0.2193  | 0.004897 |
| <i>Cxhc1</i>         | chr18:74216130-74221491   | 40.7793  | 35.7384  | -0.1904 | 0.004374 |
| <i>Dnajc11</i>       | chr4:151933690-151982137  | 7.1366   | 6.1942   | -0.2043 | 0.001823 |
| <i>Pdlim2</i>        | chr14:70164217-70177681   | 17.1778  | 14.5582  | -0.2387 | 0.012204 |
| <i>Nsg2</i>          | chr11:32004462-32059202   | 116.6149 | 98.7281  | -0.2402 | 0.018798 |
| <i>Prmt7</i>         | chr8:106210935-106252794  | 7.2538   | 6.1831   | -0.2304 | 0.000498 |
| <i>Cdk11b</i>        | chr4:155624853-155649938  | 25.1481  | 30.3545  | 0.2715  | 0.006908 |
| <i>Cope</i>          | chr8:70302517-70312993    | 25.8561  | 22.0013  | -0.2329 | 0.011405 |
| <i>Abhd15</i>        | chr11:77515120-77538607   | 5.5761   | 4.3089   | -0.3719 | 0.006293 |
| <i>Mlycd</i>         | chr8:119394877-119411102  | 8.0490   | 6.5094   | -0.3063 | 0.004414 |
| <i>NA</i>            | chr6:115675994-115677136  | 14.6241  | 10.9869  | -0.4126 | 0.013565 |
| <i>Dennd3</i>        | chr15:73512559-73572242   | 3.0018   | 2.3128   | -0.3762 | 0.006890 |
| <i>Top1</i>          | chr2:160645887-160722764  | 12.0811  | 14.2262  | 0.2358  | 0.001872 |
| <i>Exoc6b</i>        | chr6:84618486-85069513    | 3.3549   | 4.3969   | 0.3902  | 0.037990 |
| <i>Nab2</i>          | chr10:127660917-127668568 | 26.4853  | 22.9177  | -0.2087 | 0.008190 |
| <i>Ttll2</i>         | chr15:83571518-83595157   | 12.8526  | 10.6213  | -0.2751 | 0.014240 |
| <i>Pitpnb</i>        | chr5:111330762-111388359  | 8.2945   | 11.0641  | 0.4157  | 0.016918 |
| <i>Bop1</i>          | chr15:76452995-76477269   | 39.6492  | 34.7778  | -0.1891 | 0.005253 |
| <i>Hivep3</i>        | chr4:119733783-120138045  | 0.3271   | 0.6204   | 0.9235  | 0.091115 |
| <i>Ikzf3</i>         | chr11:98464901-98546031   | 10.3819  | 13.9968  | 0.4310  | 0.056964 |
| <i>Snx18</i>         | chr13:113592179-113618564 | 13.7551  | 11.7101  | -0.2322 | 0.008720 |
| <i>Wipf1</i>         | chr2:73429609-73529734    | 17.0308  | 22.2621  | 0.3864  | 0.061309 |
| <i>Id2</i>           | chr12:25093800-25096092   | 30.9478  | 45.6252  | 0.5600  | 0.071059 |
| <i>Eif3b</i>         | chr5:140419304-140443358  | 34.2073  | 44.1397  | 0.3678  | 0.033086 |
| <i>Ssh1</i>          | chr5:113937093-113993894  | 2.9522   | 3.8894   | 0.3978  | 0.030128 |
| <i>Jpx</i>           | chrX:103493557-103506425  | 0.9328   | 1.4146   | 0.6007  | 0.003720 |
| <i>NA</i>            | chr19:8770995-8772475     | 25.8414  | 17.6568  | -0.5495 | 0.055379 |
| <i>Slc46a3</i>       | chr5:147878436-147894815  | 6.1902   | 8.1071   | 0.3892  | 0.005736 |
| <i>Tkt</i>           | chr14:30548358-30574722   | 36.9863  | 32.4163  | -0.1903 | 0.006944 |
| <i>Rtn4rl1</i>       | chr11:75193782-75267769   | 9.7019   | 8.0794   | -0.2640 | 0.003541 |
| <i>Aig1</i>          | chr10:13647053-13868980   | 1.3394   | 1.7727   | 0.4044  | 0.003309 |
| <i>Gm26577</i>       | chr10:21145093-21154374   | 3.3241   | 5.0518   | 0.6038  | 0.025630 |
| <i>Dusp1</i>         | chr17:26505589-26508519   | 2.9885   | 5.3771   | 0.8474  | 0.156217 |
| <i>Map2k3</i>        | chr11:60932032-60952811   | 3.7828   | 5.5312   | 0.5481  | 0.024366 |
| <i>Xpo1</i>          | chr11:23256040-23298249   | 45.2860  | 51.4561  | 0.1843  | 0.000488 |
| <i>Sash3</i>         | chrX:48146435-48161565    | 213.5637 | 190.6375 | -0.1638 | 0.006332 |
| <i>Hook1</i>         | chr4:95967239-96025413    | 6.3610   | 7.7710   | 0.2888  | 0.007633 |
| <i>Srsf9</i>         | chr5:115327176-115333080  | 28.1308  | 23.6874  | -0.2480 | 0.001535 |
| <i>Dok2</i>          | chr14:70766035-70778495   | 32.2503  | 27.4252  | -0.2338 | 0.011788 |
| <i>Socs1</i>         | chr16:10783807-10785536   | 39.6193  | 31.8420  | -0.3153 | 0.025603 |
| <i>Rab18</i>         | chr18:6765204-6790231     | 12.4343  | 15.6482  | 0.3317  | 0.007633 |
| <i>Cdh23</i>         | chr10:60302747-60696490   | 1.4528   | 1.9260   | 0.4068  | 0.035446 |
| <i>Mef2a</i>         | chr7:67231162-67372858    | 12.8344  | 16.2123  | 0.3371  | 0.023468 |
| <i>Cmtr2</i>         | chr8:110217959-110224489  | 7.7822   | 6.3113   | -0.3022 | 0.006327 |
| <i>Gpr22</i>         | chr12:31706866-31713947   | 1.0258   | 1.6094   | 0.6498  | 0.024549 |
| <i>Ctbp1</i>         | chr5:33247723-33275004    | 88.7848  | 79.4976  | -0.1594 | 0.003045 |
| <i>Traj3</i>         | chr14:54217291-54217357   | 83.5719  | 121.8293 | 0.5438  | 0.002064 |
| <i>Arhgap11a</i>     | chr2:113831491-113848661  | 1.6934   | 2.3394   | 0.4662  | 0.012179 |
| <i>Hivep2</i>        | chr10:13966378-14151376   | 25.3215  | 31.6638  | 0.3225  | 0.047721 |

|                 |                           |          |          |         |          |
|-----------------|---------------------------|----------|----------|---------|----------|
| <i>Exoc8</i>    | chr8:124890299-124897705  | 15.2858  | 13.4270  | -0.1871 | 0.004791 |
| <i>Chmp7</i>    | chr14:69716978-69732570   | 21.8107  | 18.7202  | -0.2204 | 0.008301 |
| <i>Mdm4</i>     | chr1:132989844-133025366  | 46.7853  | 55.9660  | 0.2585  | 0.013742 |
| <i>Cpm</i>      | chr10:117629499-117687352 | 18.2186  | 15.0700  | -0.2737 | 0.034307 |
| <i>Paf1</i>     | chr7:28392950-28399388    | 33.0301  | 29.0725  | -0.1841 | 0.003251 |
| <i>Mvd</i>      | chr8:122433595-122443422  | 14.8040  | 11.8171  | -0.3251 | 0.016288 |
| <i>Bcl2a1b</i>  | chr9:89199208-89207827    | 5.0213   | 9.6910   | 0.9486  | 0.103692 |
| <i>Fyb</i>      | chr15:6579870-6663313     | 67.8579  | 56.9070  | -0.2539 | 0.051251 |
| <i>Rnaseh2c</i> | chr19:5601872-5603439     | 34.2967  | 29.3161  | -0.2264 | 0.002740 |
| <i>Taf1c</i>    | chr8:119597974-119605222  | 16.6235  | 14.3316  | -0.2140 | 0.009352 |
| <i>Gm14410</i>  | chr2:177183452-177206421  | 4.1536   | 2.9937   | -0.4724 | 0.014270 |
| <i>Sgol1</i>    | chr17:53674785-53689333   | 1.4727   | 2.1220   | 0.5270  | 0.003141 |
| <i>Ftx</i>      | chrX:103560906-103623754  | 2.4773   | 3.1433   | 0.3435  | 0.004807 |
| <i>Pctp</i>     | chr11:89982664-90002894   | 2.0105   | 1.2886   | -0.6418 | 0.017556 |
| <i>Dhx58</i>    | chr11:100694883-100704271 | 8.1386   | 11.8191  | 0.5383  | 0.048550 |
| <i>Trem12</i>   | chr17:48300037-48312534   | 54.9534  | 46.4945  | -0.2411 | 0.036276 |
| <i>Acvr2a</i>   | chr2:48814108-48903269    | 3.6221   | 4.5436   | 0.3270  | 0.003451 |
| <i>Srrm1</i>    | chr4:135320483-135353321  | 11.7037  | 14.5557  | 0.3146  | 0.039309 |
| <i>Art2a-ps</i> | chr7:101552452-101560865  | 4.3898   | 8.6310   | 0.9754  | 0.164440 |
| <i>Cd74</i>     | chr18:60803847-60812646   | 34.0038  | 60.8309  | 0.8391  | 0.050070 |
| <i>Pip5k1c</i>  | chr10:81292962-81319973   | 20.2160  | 17.5752  | -0.2020 | 0.014828 |
| <i>Sbk1</i>     | chr7:126272618-126294999  | 27.2026  | 23.7564  | -0.1954 | 0.022263 |
| <i>Pkm</i>      | chr9:59656367-59679375    | 177.5231 | 145.7448 | -0.2846 | 0.037814 |
| <i>Asap1</i>    | chr15:64086856-64382919   | 8.2915   | 11.3400  | 0.4517  | 0.075923 |
| <i>Pcca</i>     | chr14:122534323-122891100 | 6.9665   | 8.4446   | 0.2776  | 0.001994 |
| <i>Fam78a</i>   | chr2:32050054-32084857    | 90.8130  | 79.1584  | -0.1982 | 0.021950 |
| <i>Eya2</i>     | chr2:165595031-165771727  | 6.0644   | 4.6219   | -0.3919 | 0.017765 |
| <i>Fuz</i>      | chr7:44896078-44902631    | 12.2851  | 10.5900  | -0.2142 | 0.006708 |
| <i>Ly6c1</i>    | chr15:75045016-75048837   | 81.8268  | 65.1657  | -0.3285 | 0.034256 |
| <i>Supt20</i>   | chr3:54693104-54716837    | 41.0875  | 47.8330  | 0.2193  | 0.002759 |
| <i>Bcl2l2</i>   | chr14:54883376-54888234   | 0.9943   | 1.5512   | 0.6417  | 0.028084 |
| <i>Samhd1</i>   | chr2:157097532-157135265  | 47.5287  | 57.3416  | 0.2708  | 0.024676 |
| <i>Cirh1a</i>   | chr8:106893639-106923093  | 25.7148  | 22.4577  | -0.1954 | 0.000268 |
| <i>Gm26695</i>  | chr17:23556768-23558313   | 12.9181  | 9.9497   | -0.3767 | 0.011136 |
| <i>Rassf5</i>   | chr1:131176409-131245258  | 93.7564  | 84.9198  | -0.1428 | 0.001391 |
| <i>Xrn1</i>     | chr9:95954759-96053027    | 19.1385  | 22.5216  | 0.2348  | 0.012556 |
| <i>Sjfn9</i>    | chr11:82979628-82991830   | 2.6841   | 3.9013   | 0.5395  | 0.058550 |
| <i>Idnk</i>     | chr13:58157648-58164693   | 48.1478  | 40.9936  | -0.2321 | 0.015633 |
| <i>Ube2m</i>    | chr7:13035119-13038275    | 38.9110  | 32.9218  | -0.2411 | 0.015625 |
| <i>Pisd-ps2</i> | chr17:3076577-3084183     | 6.2226   | 8.6542   | 0.4759  | 0.040171 |
| <i>Slc4a7</i>   | chr14:14703024-14799943   | 10.2358  | 14.0965  | 0.4617  | 0.059360 |
| <i>B3gat2</i>   | chr1:23761752-23849158    | 5.9381   | 7.2619   | 0.2903  | 0.009751 |
| <i>Sjfn5os</i>  | chr11:82942340-82960681   | 8.5992   | 13.4080  | 0.6408  | 0.017949 |
| <i>Uso1</i>     | chr5:92137937-92202794    | 8.1093   | 10.6489  | 0.3931  | 0.047735 |
| <i>Arf5</i>     | chr6:28423559-28426602    | 106.2241 | 85.2902  | -0.3167 | 0.047293 |
| <i>Nop2</i>     | chr6:125131882-125144753  | 31.2972  | 27.0351  | -0.2112 | 0.009212 |
| <i>Emc9</i>     | chr14:55581515-55585302   | 37.0480  | 30.7409  | -0.2692 | 0.030158 |
| <i>Mtch1</i>    | chr17:29332071-29347904   | 19.0464  | 15.6687  | -0.2816 | 0.042538 |
| <i>Gm20427</i>  | chr17:34026033-34031572   | 62.9680  | 56.1244  | -0.1660 | 0.005742 |
| <i>Tuba4a</i>   | chr1:75214973-75219253    | 93.5402  | 77.6029  | -0.2695 | 0.038029 |
| <i>Hes6</i>     | chr1:91411482-91414038    | 21.5527  | 17.9125  | -0.2669 | 0.013737 |
| <i>Tlk1</i>     | chr2:70712406-70825728    | 25.0854  | 29.5811  | 0.2378  | 0.007322 |
| <i>Pold1</i>    | chr7:44532745-44548849    | 10.0040  | 8.6694   | -0.2066 | 0.001648 |
| <i>Brwd3</i>    | chrX:108737015-108834372  | 3.8913   | 4.6733   | 0.2642  | 0.011428 |
| <i>Abhd4</i>    | chr14:54254128-54269169   | 1.3617   | 2.6703   | 0.9715  | 0.099834 |
| <i>Cerk</i>     | chr15:86139127-86186141   | 10.8372  | 9.0787   | -0.2554 | 0.018876 |
| <i>Mtrr</i>     | chr13:68560779-68582121   | 11.2601  | 9.5494   | -0.2377 | 0.009385 |
| <i>Chpf</i>     | chr1:75474568-75479471    | 8.1336   | 6.8852   | -0.2404 | 0.002575 |
| <i>Snx9</i>     | chr17:5841327-5931033     | 1.5096   | 2.4921   | 0.7232  | 0.037354 |
| <i>Gm15472</i>  | chr3:103863165-103864423  | 4.0990   | 6.8600   | 0.7429  | 0.031591 |
| <i>Nfkbia</i>   | chr12:55489410-55492647   | 107.5965 | 131.7374 | 0.2920  | 0.034752 |
| <i>Ckb</i>      | chr12:111669354-111672338 | 8.5188   | 5.4321   | -0.6491 | 0.062742 |
| <i>Ppm1f</i>    | chr16:16896468-16927364   | 19.6202  | 16.9025  | -0.2151 | 0.018527 |
| <i>Nipbl</i>    | chr15:8291224-8444463     | 57.8015  | 66.4264  | 0.2006  | 0.005330 |
| <i>Gtf2h3</i>   | chr5:124579139-124597680  | 9.0656   | 7.6444   | -0.2460 | 0.004045 |
| <i>Ssbp4</i>    | chr8:70597490-70608314    | 58.2961  | 49.3753  | -0.2396 | 0.025595 |
| <i>Gm9725</i>   | chr8:81013575-81038584    | 19.9603  | 16.8991  | -0.2402 | 0.016689 |
| <i>Itgb7</i>    | chr15:102215994-102231935 | 344.7076 | 299.3022 | -0.2038 | 0.040332 |
| <i>Mfsd7b</i>   | chr1:191005831-191026190  | 16.0281  | 13.8840  | -0.2072 | 0.009509 |
| <i>Endog</i>    | chr2:30171492-30174069    | 16.1352  | 12.6840  | -0.3472 | 0.009025 |
| <i>Ssfa2</i>    | chr2:79635351-79672966    | 5.8560   | 7.5588   | 0.3682  | 0.022054 |

|                      |                           |           |           |         |          |
|----------------------|---------------------------|-----------|-----------|---------|----------|
| <i>Nus1</i>          | chr10:52417546-52440192   | 9.7008    | 11.6944   | 0.2696  | 0.005119 |
| <i>Gm16755</i>       | chr11:120486338-120488582 | 5.8645    | 8.8632    | 0.5958  | 0.019092 |
| <i>BC037034</i>      | chr5:138259655-138264046  | 23.4340   | 20.0377   | -0.2259 | 0.028983 |
| <i>BC037034</i>      | chr5:138259657-138264046  | 25.0188   | 21.3849   | -0.2264 | 0.029076 |
| <i>Mafk</i>          | chr5:139791512-139802653  | 19.3161   | 17.0029   | -0.1840 | 0.003349 |
| <i>Tspo</i>          | chr15:83563572-83574201   | 73.9062   | 60.6226   | -0.2858 | 0.024928 |
| <i>Neu1</i>          | chr17:34931252-34935953   | 20.3274   | 23.4360   | 0.2053  | 0.000677 |
| <i>Mex3a</i>         | chr3:88532394-88541396    | 1.2397    | 0.8349    | -0.5702 | 0.018112 |
| <i>Phf23</i>         | chr11:69995776-70000009   | 26.8548   | 23.2333   | -0.2090 | 0.008127 |
| <i>Hnrnpa2b1</i>     | chr6:51460433-51469894    | 132.7058  | 156.3600  | 0.2366  | 0.009312 |
| <i>Fkbp8</i>         | chr8:70527723-70535328    | 63.6868   | 56.2880   | -0.1782 | 0.018313 |
| <i>Plekha7</i>       | chr7:116123492-116308376  | 2.1009    | 1.7440    | -0.2686 | 0.000863 |
| <i>Csrp2bp</i>       | chr2:144368982-144407676  | 13.0028   | 11.3171   | -0.2003 | 0.002633 |
| <i>Z310001H17Rik</i> | chr6:129208411-129237982  | 6.5906    | 8.7937    | 0.4161  | 0.062831 |
| <i>Sirpa</i>         | chr2:129592834-129632228  | 0.8844    | 1.5647    | 0.8230  | 0.085108 |
| <i>Rnasel</i>        | chr1:153749425-153764221  | 13.0093   | 15.4445   | 0.2476  | 0.011329 |
| <i>Pdk1</i>          | chr2:71873223-71903858    | 93.9200   | 77.1173   | -0.2844 | 0.059777 |
| <i>Slc15a2</i>       | chr16:36750177-36784962   | 10.7515   | 7.7523    | -0.4718 | 0.092333 |
| <i>Zbtb20</i>        | chr16:42875880-43642602   | 2.8880    | 3.8598    | 0.4185  | 0.094132 |
| <i>Esrra</i>         | chr19:6910976-6921813     | 13.6129   | 11.3303   | -0.2648 | 0.014699 |
| <i>Zbtb48</i>        | chr4:152019773-152027671  | 8.5203    | 6.8896    | -0.3065 | 0.024327 |
| <i>Grccl10</i>       | chr6:124739182-124741374  | 77.2459   | 62.1963   | -0.3126 | 0.037456 |
| <i>Vasn</i>          | chr16:4639940-4650802     | 4.5780    | 6.6108    | 0.5301  | 0.059598 |
| <i>Hmgxb3</i>        | chr18:61131278-61177050   | 21.2613   | 18.6171   | -0.1916 | 0.021056 |
| <i>Sla2</i>          | chr2:156872456-156887192  | 37.6489   | 32.7876   | -0.1995 | 0.009021 |
| <i>Atic</i>          | chr1:71557149-71579631    | 23.9404   | 21.0386   | -0.1864 | 0.007097 |
| <i>Eef2</i>          | chr10:81176630-81182507   | 1355.7982 | 1189.8352 | -0.1884 | 0.021979 |
| <i>Tm9sf4</i>        | chr2:153161302-153210466  | 5.8166    | 6.9965    | 0.2665  | 0.008219 |
| <i>Gtf3a</i>         | chr5:146948656-146955614  | 33.2495   | 29.3535   | -0.1798 | 0.003814 |
| <i>Zfp276</i>        | chr8:123254194-123269745  | 12.7631   | 10.9858   | -0.2163 | 0.023254 |
| <i>Wdr18</i>         | chr10:79960151-79969246   | 17.4743   | 15.1129   | -0.2095 | 0.005704 |
| <i>Esrp2</i>         | chr8:106130318-106136974  | 3.0998    | 4.2289    | 0.4481  | 0.042422 |
| <i>Apbb1ip</i>       | chr2:22774093-22875653    | 10.6782   | 13.3386   | 0.3209  | 0.053006 |
| <i>Lrrc8a</i>        | chr2:30237714-30282148    | 21.5015   | 18.6715   | -0.2036 | 0.024391 |
| <i>Taldo1</i>        | chr7:141392198-141402968  | 67.8236   | 55.7316   | -0.2833 | 0.042188 |
| <i>Capn1</i>         | chr19:5988545-6015825     | 67.7469   | 60.7514   | -0.1572 | 0.009368 |
| <i>Whsc1l1</i>       | chr8:25601600-25719667    | 19.1293   | 22.9663   | 0.2637  | 0.033934 |
| <i>Gm12992</i>       | chr4:131899477-131920029  | 6.8895    | 9.1797    | 0.4140  | 0.047340 |
| <i>Pisd-ps1</i>      | chr11:3125903-3131004     | 62.6780   | 78.3937   | 0.3228  | 0.045839 |
| <i>Rps2</i>          | chr17:24718115-24721929   | 121.7831  | 97.5092   | -0.3207 | 0.048577 |
| <i>Sp6</i>           | chr11:97013393-97024734   | 3.3542    | 2.3894    | -0.4893 | 0.061311 |
| <i>Ncapp2</i>        | chr12:116405401-116463531 | 1.0859    | 1.7414    | 0.6813  | 0.059324 |
| <i>Samd1</i>         | chr8:83997671-84000386    | 22.2223   | 18.2639   | -0.2830 | 0.021241 |
| <i>Ist1</i>          | chr8:109671321-109693294  | 62.5538   | 56.2538   | -0.1531 | 0.002212 |
| <i>Lipa</i>          | chr19:34492317-34527474   | 64.0248   | 55.2026   | -0.2139 | 0.024514 |
| <i>Smap1</i>         | chr1:23844845-23922317    | 15.3827   | 18.6944   | 0.2813  | 0.018481 |
| <i>NA</i>            | chr1:133131179-133131782  | 23.7470   | 18.6705   | -0.3470 | 0.006021 |
| <i>Wdr26</i>         | chr1:181173227-181211552  | 33.4594   | 38.6636   | 0.2086  | 0.015613 |
| <i>Slc50a1</i>       | chr3:89268245-89270570    | 66.1256   | 57.4850   | -0.2020 | 0.017131 |
| <i>Aldh4a1</i>       | chr4:139622865-139649690  | 7.8129    | 6.5897    | -0.2457 | 0.008558 |
| <i>Utp23</i>         | chr15:51877428-51884614   | 7.2631    | 5.7692    | -0.3322 | 0.027030 |
| <i>Ccdc141</i>       | chr2:77009901-77170636    | 0.4530    | 0.6868    | 0.6003  | 0.025048 |
| <i>Pld2</i>          | chr11:70540063-70558110   | 0.4939    | 0.8228    | 0.7365  | 0.048078 |
| <i>Tk1</i>           | chr11:117815525-117826092 | 0.9555    | 1.4346    | 0.5864  | 0.040617 |
| <i>Zfp787</i>        | chr7:6131488-6155971      | 8.2871    | 6.4123    | -0.3700 | 0.015693 |
| <i>Furin</i>         | chr7:80388584-80405436    | 3.4438    | 4.8176    | 0.4843  | 0.074522 |
| <i>Rnf166</i>        | chr8:122466146-122476064  | 58.2563   | 49.7437   | -0.2279 | 0.026216 |
| <i>Gm26590</i>       | chr14:52197501-52213852   | 17.5234   | 22.4515   | 0.3575  | 0.025628 |
| <i>Tbc1d13</i>       | chr2:30133745-30152013    | 16.0964   | 14.0914   | -0.1919 | 0.005470 |
| <i>Spata5l1</i>      | chr2:122630624-122632930  | 12.5111   | 10.1118   | -0.3072 | 0.007323 |
| <i>Ugcg</i>          | chr4:59189256-59222833    | 76.1791   | 89.3821   | 0.2306  | 0.015786 |
| <i>Stard3</i>        | chr11:98358367-98381112   | 15.8065   | 13.5204   | -0.2254 | 0.013241 |
| <i>Etfa</i>          | chr9:55454507-55512243    | 8.2949    | 11.0569   | 0.4146  | 0.012954 |
| <i>lds</i>           | chrX:70343068-70365084    | 3.6321    | 4.8328    | 0.4121  | 0.034225 |
| <i>Nfia</i>          | chr4:97772733-98118874    | 0.3139    | 0.5420    | 0.7880  | 0.061808 |
| <i>Rsf1</i>          | chr7:97579895-97692782    | 11.3908   | 13.4173   | 0.2362  | 0.014859 |
| <i>Gm26596</i>       | chr10:112928500-112931155 | 5.8644    | 4.5802    | -0.3566 | 0.016014 |
| <i>H3f3b</i>         | chr11:116021911-116027962 | 70.7842   | 92.1133   | 0.3800  | 0.066186 |
| <i>Noa1</i>          | chr5:77294181-77310084    | 6.9945    | 5.8687    | -0.2532 | 0.004444 |
| <i>Atn1</i>          | chr6:124739188-124756524  | 28.8511   | 23.3647   | -0.3043 | 0.043056 |
| <i>Was</i>           | chrX:8081452-8090498      | 81.7088   | 70.5375   | -0.2121 | 0.022823 |

|                      |                           |          |          |         |          |
|----------------------|---------------------------|----------|----------|---------|----------|
| <i>Ncl</i>           | chr1:86344718-86359455    | 21.3433  | 27.3286  | 0.3566  | 0.035208 |
| <i>Cblb</i>          | chr16:52031548-52208047   | 14.0819  | 17.8799  | 0.3445  | 0.075140 |
| <i>Tex264</i>        | chr9:106658746-106685948  | 24.6069  | 21.2104  | -0.2143 | 0.008176 |
| <i>Dohh</i>          | chr10:81384427-81391560   | 10.2278  | 8.6337   | -0.2444 | 0.006197 |
| <i>Arf6</i>          | chr12:69372149-69375979   | 131.1049 | 116.0608 | -0.1758 | 0.017160 |
| <i>Gm2245</i>        | chr15:6604340-6654303     | 14.8454  | 12.6406  | -0.2320 | 0.027681 |
| <i>Gm11532</i>       | chr11:97020507-97026248   | 2.8313   | 2.0971   | -0.4331 | 0.053931 |
| <i>2410016O06Rik</i> | chr12:83950607-83952953   | 18.9880  | 16.3930  | -0.2120 | 0.004782 |
| <i>Tnfrsf9</i>       | chr4:150914561-150946102  | 4.3477   | 6.4892   | 0.5778  | 0.059046 |
| <i>Tomm40</i>        | chr7:19701312-19715438    | 12.4045  | 10.6249  | -0.2234 | 0.014003 |
| <i>Cog8</i>          | chr8:107046288-107056689  | 23.9762  | 21.0193  | -0.1899 | 0.012533 |
| <i>Mtbp</i>          | chr15:55557407-55626423   | 3.6010   | 4.4176   | 0.2948  | 0.000678 |
| <i>Mapre2</i>        | chr18:23752332-23893861   | 1.3713   | 1.8776   | 0.4533  | 0.052226 |
| <i>R3hdm1</i>        | chr1:128103305-128237735  | 8.5793   | 10.5930  | 0.3042  | 0.024782 |
| <i>Scarna2</i>       | chr3:108554337-108554751  | 988.8147 | 862.3368 | -0.1974 | 0.023214 |
| <i>E130307A14Rik</i> | chr10:39621411-39732007   | 5.2008   | 6.3495   | 0.2879  | 0.015706 |
| <i>Apba3</i>         | chr10:81268171-81273246   | 15.5096  | 12.9995  | -0.2547 | 0.014945 |
| <i>Nf1</i>           | chr11:79339692-79581612   | 1.4987   | 1.9491   | 0.3791  | 0.047783 |
| <i>Usp32</i>         | chr11:84984441-85140161   | 11.5472  | 13.6689  | 0.2434  | 0.017804 |
| <i>C530050E15Rik</i> | chr13:24631917-24638567   | 13.1570  | 18.0507  | 0.4562  | 0.101158 |
| <i>Ttc28</i>         | chr5:110879802-111289780  | 1.2128   | 1.6900   | 0.4787  | 0.087254 |
| <i>Klh25</i>         | chr7:75848337-75874130    | 15.8022  | 13.7191  | -0.2039 | 0.012375 |
| <i>Gtpbp3</i>        | chr8:71488102-71499583    | 8.5122   | 6.9953   | -0.2832 | 0.036177 |
| <i>G430095P16Rik</i> | chr8:84723006-84726844    | 26.4291  | 21.8347  | -0.2755 | 0.000215 |
| <i>Wash</i>          | chr17:66111545-66120503   | 19.1671  | 16.7244  | -0.1967 | 0.002987 |
| <i>Timmdc1</i>       | chr16:38498346-38522663   | 14.7544  | 12.2086  | -0.2732 | 0.011208 |
| <i>A1837181</i>      | chr19:5425156-5427313     | 42.1505  | 35.6713  | -0.2408 | 0.025927 |
| <i>Qrfp</i>          | chr2:31806165-31810580    | 3.4748   | 2.4020   | -0.5327 | 0.053708 |
| <i>Siah2</i>         | chr3:58674937-58692400    | 5.9004   | 4.7348   | -0.3175 | 0.011582 |
| <i>Ptpn22</i>        | chr3:103859794-103912247  | 42.0321  | 49.3648  | 0.2320  | 0.020233 |
| <i>2200002D01Rik</i> | chr7:29246560-29248432    | 5.5184   | 4.0464   | -0.4476 | 0.008754 |
| <i>Gm9905</i>        | chr7:121033251-121035096  | 5.1061   | 3.6796   | -0.4727 | 0.023532 |
| <i>Setbp1</i>        | chr18:78750379-79109391   | 0.2632   | 0.5915   | 1.1684  | 0.144914 |
| <i>Dgkz</i>          | chr2:91932823-91975864    | 75.9651  | 68.7169  | -0.1447 | 0.027247 |
| <i>Ccdc71l</i>       | chr12:32378788-32382943   | 16.1768  | 14.1544  | -0.1927 | 0.004376 |
| <i>Cdadc1</i>        | chr14:59560895-59597836   | 5.5467   | 7.9783   | 0.5245  | 0.064845 |
| <i>Pik3r1</i>        | chr13:101680760-101768217 | 49.8024  | 43.4351  | -0.1974 | 0.032206 |
| <i>Rb1</i>           | chr14:73183672-7325822    | 23.0216  | 26.3741  | 0.1961  | 0.005231 |
| <i>Cdc42se1</i>      | chr3:95228731-95236409    | 158.9596 | 144.8144 | -0.1345 | 0.006494 |
| <i>Srp68</i>         | chr11:116245165-116274217 | 14.4168  | 17.6962  | 0.2957  | 0.014675 |
| <i>Frat1</i>         | chr19:41830167-41830809   | 14.8768  | 10.7050  | -0.4748 | 0.025758 |
| <i>Pou5f2</i>        | chr13:78022912-78026296   | 1.3904   | 2.2136   | 0.6709  | 0.039512 |
| <i>Grp2</i>          | chr15:80623504-80650559   | 118.6187 | 102.6248 | -0.2090 | 0.039126 |
| <i>Dock4</i>         | chr12:40446052-40846486   | 0.5515   | 0.9245   | 0.7455  | 0.079427 |
| <i>Gramd3</i>        | chr18:56432131-56503792   | 65.9400  | 78.1663  | 0.2454  | 0.020200 |
| <i>Gm13610</i>       | chr2:32232781-32236382    | 7.2752   | 10.4882  | 0.5277  | 0.048157 |
| <i>Zbtb9</i>         | chr17:26973166-26976205   | 40.2394  | 35.6898  | -0.1731 | 0.007079 |
| <i>Tmem203</i>       | chr2:25255438-25256352    | 11.2843  | 8.4915   | -0.4102 | 0.014813 |
| <i>Spef1</i>         | chr2:131170260-131187282  | 2.2137   | 1.5495   | -0.5147 | 0.009678 |
| <i>Aacs</i>          | chr5:125475813-125517412  | 12.7090  | 10.6686  | -0.2525 | 0.035504 |
| <i>Spns1</i>         | chr7:126370059-126377450  | 18.1289  | 15.3186  | -0.2430 | 0.041480 |
| <i>Pmaip1</i>        | chr18:66458603-66465550   | 2.5027   | 3.6029   | 0.5257  | 0.036676 |
| <i>Maf1</i>          | chr15:76351293-76354380   | 69.9910  | 61.9756  | -0.1755 | 0.016666 |
| <i>NA</i>            | chr16:43620876-43623955   | 2.6477   | 3.8742   | 0.5492  | 0.067660 |
| <i>AW209491</i>      | chr13:14630244-14638202   | 6.0385   | 4.6139   | -0.3882 | 0.009260 |
| <i>Prmt1</i>         | chr7:44975988-44986492    | 11.1121  | 13.6407  | 0.2958  | 0.006981 |
| <i>Rrnad1</i>        | chr3:87922600-87930717    | 21.7008  | 19.7659  | -0.1347 | 0.000652 |
| <i>Luc7l2</i>        | chr6:38551333-38609470    | 22.1259  | 26.3616  | 0.2527  | 0.028849 |
| <i>Ccr9</i>          | chr9:123678438-123783457  | 3.3964   | 2.7107   | -0.3253 | 0.011704 |
| <i>Fermt3</i>        | chr19:6998957-7019469     | 130.7968 | 116.4055 | -0.1682 | 0.026084 |
| <i>Agtrap</i>        | chr4:148077060-148088031  | 10.0437  | 8.6736   | -0.2116 | 0.004774 |
| <i>Parn</i>          | chr16:13537963-13668170   | 14.9632  | 17.8236  | 0.2524  | 0.007047 |
| <i>Tcf3</i>          | chr10:80409513-80433647   | 22.2420  | 19.8318  | -0.1655 | 0.011000 |
| <i>Tref1</i>         | chr17:47140941-47359458   | 1.7954   | 2.5720   | 0.5186  | 0.042429 |
| <i>Fam120aas</i>     | chr13:48968286-48972031   | 13.7008  | 11.1943  | -0.2915 | 0.029509 |
| <i>Adamts6</i>       | chr13:104287872-104494763 | 10.5830  | 12.7302  | 0.2665  | 0.022911 |
| <i>BC003331</i>      | chr1:150361304-150393080  | 8.7053   | 10.6176  | 0.2865  | 0.017934 |
| <i>Zfp672</i>        | chr11:58315113-58323346   | 18.7323  | 16.4733  | -0.1854 | 0.005669 |
| <i>Ptpn21</i>        | chr12:98676740-98737405   | 0.5924   | 0.8990   | 0.6018  | 0.008319 |
| <i>Kat6a</i>         | chr8:22859534-22943259    | 22.1839  | 27.5556  | 0.3128  | 0.083839 |
| <i>Amt</i>           | chr9:108296852-108301571  | 3.8130   | 2.6965   | -0.4999 | 0.012377 |

|                      |                           |          |          |         |          |
|----------------------|---------------------------|----------|----------|---------|----------|
| <i>Srsf4</i>         | chr4:131873616-131901706  | 18.0181  | 22.8606  | 0.3434  | 0.048378 |
| <i>Bcl7b</i>         | chr5:135168282-135181855  | 24.0086  | 20.3479  | -0.2387 | 0.022823 |
| <i>Ap2s1</i>         | chr7:16738409-16749294    | 48.7506  | 40.5317  | -0.2664 | 0.033590 |
| <i>Eif2s3x</i>       | chrX:94188706-94212862    | 2.7506   | 3.5849   | 0.3822  | 0.004692 |
| <i>App</i>           | chr16:84954439-85173707   | 3.1561   | 4.4529   | 0.4966  | 0.027540 |
| <i>Acss2</i>         | chr2:155517947-155585724  | 16.1601  | 13.5235  | -0.2570 | 0.066341 |
| <i>Rmdn3</i>         | chr2:119137000-119157034  | 9.6773   | 8.2116   | -0.2370 | 0.021411 |
| <i>Slc16a5</i>       | chr11:115462473-115474398 | 26.6150  | 20.6903  | -0.3633 | 0.089879 |
| <i>Xab2</i>          | chr8:3608420-3621316      | 33.5126  | 30.6198  | -0.1302 | 0.002362 |
| <i>Nktr</i>          | chr9:121719168-121756843  | 24.2640  | 27.4218  | 0.1765  | 0.010187 |
| <i>Nupl2</i>         | chr5:24164962-24184013    | 2.1477   | 2.8460   | 0.4061  | 0.001023 |
| <i>NA</i>            | chr1:60703917-60705656    | 5.7740   | 4.3607   | -0.4050 | 0.017028 |
| <i>Fnbp1</i>         | chr2:31026205-31142008    | 15.8005  | 19.2490  | 0.2848  | 0.044576 |
| <i>Smcp2</i>         | chr4:120968316-121017247  | 22.3362  | 27.0804  | 0.2779  | 0.030723 |
| <i>Sirt7</i>         | chr11:120618371-120625240 | 48.0836  | 41.6660  | -0.2067 | 0.049685 |
| <i>Tspyl4</i>        | chr10:34297420-34301308   | 25.4326  | 22.1138  | -0.2017 | 0.033779 |
| <i>Yod1</i>          | chr1:130717326-130722055  | 9.3638   | 11.2083  | 0.2594  | 0.004086 |
| <i>Mlf2</i>          | chr6:124931387-124936138  | 43.4481  | 37.7522  | -0.2027 | 0.014270 |
| <i>Cep295</i>        | chr9:15316914-15357788    | 10.6923  | 12.5735  | 0.2338  | 0.019940 |
| <i>Plcb4</i>         | chr2:135659010-136014593  | 0.8289   | 1.2507   | 0.5935  | 0.087439 |
| <i>Rnpc3</i>         | chr3:113605066-113630149  | 18.3635  | 16.3281  | -0.1695 | 0.010239 |
| <i>Rgl2</i>          | chr17:33929542-33937687   | 42.6910  | 37.4437  | -0.1892 | 0.037603 |
| <i>Gpx1</i>          | chr9:108339079-108340338  | 122.0468 | 98.6006  | -0.3078 | 0.052279 |
| <i>Tdrd7</i>         | chr4:45965333-46034761    | 0.9572   | 1.5195   | 0.6667  | 0.030185 |
| <i>Der1</i>          | chr15:57869501-57892418   | 34.0997  | 30.5857  | -0.1569 | 0.008560 |
| <i>5830415F09Rik</i> | chr4:46376504-46389437    | 15.9009  | 13.5544  | -0.2304 | 0.010838 |
| <i>Xylt2</i>         | chr11:94663850-94677515   | 27.6588  | 23.5704  | -0.2308 | 0.050241 |
| <i>Ywhag</i>         | chr5:135908408-135934616  | 10.4081  | 12.5757  | 0.2729  | 0.017574 |
| <i>Nr2f6</i>         | chr8:71374122-71381960    | 6.7247   | 5.2729   | -0.3509 | 0.052189 |
| <i>Epc1</i>          | chr18:6435950-6516108     | 47.2006  | 43.1019  | -0.1311 | 0.004317 |
| <i>Eif6</i>          | chr2:155819831-155826925  | 34.0589  | 29.5403  | -0.2053 | 0.019349 |
| <i>Fkbp4</i>         | chr6:128429734-128438677  | 45.6595  | 37.8477  | -0.2707 | 0.061705 |
| <i>Snape3</i>        | chr4:83417723-83467676    | 23.5653  | 26.7936  | 0.1852  | 0.003323 |
| <i>Slc1a4</i>        | chr11:20302179-20332713   | 1.4349   | 2.1049   | 0.5528  | 0.041740 |
| <i>Tmub1</i>         | chr5:24445457-24447854    | 16.7866  | 14.0803  | -0.2536 | 0.014992 |
| <i>Unc93b1</i>       | chr19:3935185-3949340     | 3.9114   | 5.2573   | 0.4267  | 0.026299 |
| <i>Slc35g1</i>       | chr19:38395979-38405607   | 13.5793  | 11.6721  | -0.2183 | 0.016180 |
| <i>1700056N10Rik</i> | chr16:17047519-17049111   | 4.9987   | 7.1494   | 0.5163  | 0.020955 |
| <i>Rrn3</i>          | chr16:13780698-13814840   | 38.9292  | 33.8978  | -0.1997 | 0.028661 |
| <i>Adam8</i>         | chr7:139978931-139992562  | 0.8454   | 1.2497   | 0.5639  | 0.007386 |
| <i>Sec11c</i>        | chr18:65800548-65817665   | 22.0500  | 26.1358  | 0.2452  | 0.020559 |
| <i>Rnf43</i>         | chr11:87662721-87735539   | 2.5477   | 3.5009   | 0.4585  | 0.064137 |
| <i>Csk</i>           | chr9:57626646-57645653    | 131.8736 | 119.6942 | -0.1398 | 0.013154 |
| <i>Cactin</i>        | chr10:81321102-81326251   | 25.2105  | 22.0078  | -0.1960 | 0.023619 |
| <i>Ttyh3</i>         | chr5:140620585-140649031  | 7.9170   | 10.9924  | 0.4735  | 0.097197 |
| <i>Tmem208</i>       | chr8:105326353-105335219  | 30.8841  | 26.9154  | -0.1984 | 0.010015 |
| <i>Gcnt1</i>         | chr19:17326140-17356667   | 0.5175   | 1.1063   | 1.0961  | 0.149124 |
| <i>Mettl21c</i>      | chr1:44009407-44020034    | 1.3829   | 1.9766   | 0.5153  | 0.031675 |
| <i>Cmip</i>          | chr8:117257018-117461503  | 7.0599   | 9.3426   | 0.4042  | 0.087256 |
| <i>Dpm3</i>          | chr3:89259357-89267079    | 23.0436  | 17.4803  | -0.3986 | 0.062111 |
| <i>2810408A11Rik</i> | chr11:69897351-69900987   | 3.4786   | 2.5873   | -0.4271 | 0.007170 |
| <i>Ikbke</i>         | chr1:131254342-131279606  | 45.8639  | 55.9154  | 0.2859  | 0.062306 |
| <i>Diap1</i>         | chr18:37843600-37935476   | 17.5396  | 22.1638  | 0.3376  | 0.082812 |
| <i>Rufy1</i>         | chr11:50389285-50431125   | 13.2602  | 11.3510  | -0.2243 | 0.006719 |
| <i>Atxn7l3</i>       | chr11:102289299-102296631 | 38.0453  | 34.9132  | -0.1239 | 0.000459 |
| <i>Josd2</i>         | chr7:44467979-44471652    | 18.4053  | 15.6643  | -0.2326 | 0.037217 |
| <i>Cdc73</i>         | chr1:143598796-143702893  | 3.1681   | 3.9020   | 0.3006  | 0.045824 |
| <i>H2-Ab1</i>        | chr17:34263208-34269418   | 14.3283  | 26.0294  | 0.8613  | 0.075659 |
| <i>Txn14a</i>        | chr18:80206794-80223533   | 18.7505  | 15.9179  | -0.2363 | 0.021442 |
| <i>Yif1b</i>         | chr7:29238328-29247593    | 14.6158  | 11.9817  | -0.2867 | 0.021325 |
| <i>Cd44</i>          | chr2:102811140-102901665  | 7.1618   | 10.0722  | 0.4920  | 0.123087 |
| <i>Gm26860</i>       | chr10:42761595-42763635   | 3.5705   | 5.0746   | 0.5072  | 0.015753 |
| <i>Lynx1</i>         | chr15:74747855-74752979   | 2.8470   | 2.1694   | -0.3922 | 0.021231 |
| <i>Pfkm</i>          | chr15:98092588-98132447   | 7.5461   | 6.3103   | -0.2580 | 0.006208 |
| <i>Inpp4a</i>        | chr1:37299864-37410736    | 5.3295   | 7.0345   | 0.4005  | 0.095778 |
| <i>Etv6</i>          | chr6:134035699-134270158  | 4.2471   | 6.2161   | 0.5495  | 0.144022 |
| <i>Ppp2r5a</i>       | chr1:191351980-191397041  | 169.0180 | 145.7177 | -0.2140 | 0.045751 |
| <i>Trp53i13</i>      | chr11:77508098-77515980   | 6.8065   | 5.4592   | -0.3182 | 0.007172 |
| <i>Slc25a38</i>      | chr9:120110373-120124504  | 11.9389  | 10.1242  | -0.2379 | 0.022000 |
| <i>Cnnm4</i>         | chr1:36471619-36508764    | 4.5852   | 3.7138   | -0.3041 | 0.035984 |
| <i>4732487G21Rik</i> | chr12:86290760-86306006   | 5.4251   | 6.8008   | 0.3260  | 0.003674 |



|               |                           |          |          |         |          |
|---------------|---------------------------|----------|----------|---------|----------|
| 9130019O22Rik | chr7:127382259-127387166  | 5.8350   | 4.7155   | -0.3073 | 0.040226 |
| Ptprs         | chr17:56412430-56476483   | 1.1542   | 1.8858   | 0.7083  | 0.129631 |
| Dirc2         | chr16:35694061-35769356   | 11.9197  | 10.4640  | -0.1879 | 0.013798 |
| Vgll4         | chr6:114860627-114969994  | 27.8653  | 24.9264  | -0.1608 | 0.019869 |
| Shc1          | chr3:89418442-89430015    | 11.6486  | 10.3314  | -0.1731 | 0.004720 |
| Zfp653        | chr9:22055459-22071345    | 13.7064  | 11.5337  | -0.2490 | 0.022894 |
| Fam196b       | chr11:34314821-34422640   | 10.1865  | 14.1711  | 0.4763  | 0.137571 |
| Necap2        | chr4:141066511-141078357  | 28.4875  | 25.5325  | -0.1580 | 0.009155 |
| Slc39a7       | chr17:34028266-34031690   | 50.7278  | 45.2711  | -0.1642 | 0.016337 |
| Vps51         | chr19:6067841-6080324     | 15.4163  | 13.5420  | -0.1870 | 0.020441 |
| Rpn1          | chr6:88084472-88105304    | 37.7875  | 33.9578  | -0.1542 | 0.019959 |
| Gm8995        | chr7:106510538-106511671  | 393.3607 | 451.9209 | 0.2002  | 0.028900 |
| Hsd3b7        | chr7:127785607-127803802  | 3.6732   | 4.6612   | 0.3437  | 0.045294 |
| 2510039O18Rik | chr4:147940894-147947314  | 45.3214  | 39.7169  | -0.1904 | 0.057783 |
| Fzr1          | chr10:81366221-81378516   | 8.8285   | 7.3835   | -0.2579 | 0.045600 |
| Slc16a10      | chr10:40033534-40142254   | 2.9355   | 2.2997   | -0.3522 | 0.031935 |
| Edem1         | chr6:108828640-108859356  | 53.7133  | 48.1405  | -0.1580 | 0.024917 |
| Uros          | chr7:133686242-133710072  | 9.1203   | 7.7140   | -0.2416 | 0.020895 |
| Ino80d        | chr1:62958417-63114667    | 8.9058   | 11.0475  | 0.3109  | 0.080296 |
| Elf4          | chrX:48411045-48463132    | 13.1742  | 17.0731  | 0.3740  | 0.095441 |
| Myo10         | chr15:25622524-25813673   | 5.9111   | 5.1219   | -0.2067 | 0.022176 |
| S1pr4         | chr10:81497744-81500132   | 101.1889 | 91.2421  | -0.1493 | 0.043544 |
| Ppp3r1        | chr11:17159262-17200375   | 28.4685  | 32.6902  | 0.1995  | 0.003360 |
| Trim27        | chr13:21179444-21194724   | 28.4935  | 25.8270  | -0.1418 | 0.002831 |
| Pspc1         | chr14:56722440-56778316   | 14.5838  | 16.9070  | 0.2133  | 0.006983 |
| Bcl6          | chr16:23965051-23988852   | 4.2166   | 5.3473   | 0.3427  | 0.052583 |
| Arhgap26      | chr18:38601533-39376284   | 1.4926   | 2.0179   | 0.4350  | 0.091285 |
| Rnf220        | chr4:117271462-117497052  | 14.9187  | 13.3420  | -0.1611 | 0.022253 |
| Gm26778       | chr14:102978219-102982528 | 1.7205   | 2.3328   | 0.4392  | 0.005486 |
| NA            | chr14:102978219-102982528 | 1.7205   | 2.3328   | 0.4392  | 0.005486 |
| Uba1          | chrX:20658325-20683179    | 89.2832  | 80.2287  | -0.1543 | 0.018146 |
| Gsn           | chr2:35279662-35307892    | 27.0456  | 23.0645  | -0.2297 | 0.048624 |
| Trim23        | chr13:104178796-104203372 | 8.3239   | 9.8877   | 0.2484  | 0.017552 |
| Ptxna1        | chr6:89316315-89362613    | 1.0121   | 0.7230   | -0.4853 | 0.051687 |
| Pgp           | chr17:24470472-24471591   | 12.4700  | 9.7863   | -0.3496 | 0.019150 |
| 2810008D09Rik | chr11:117076789-117078955 | 27.9217  | 23.6545  | -0.2393 | 0.039162 |
| Plekha5       | chr6:140424098-140594906  | 6.4831   | 7.8198   | 0.2704  | 0.016302 |
| Tmem147       | chr7:30727700-30729534    | 33.7501  | 27.6790  | -0.2861 | 0.031478 |
| Cdv3          | chr9:103353101-103365780  | 15.2939  | 13.2837  | -0.2033 | 0.038727 |
| BC094916      | chr1:173519716-173535957  | 18.1625  | 23.0669  | 0.3449  | 0.066195 |
| Vasp          | chr7:19256928-19271817    | 154.0269 | 138.9195 | -0.1489 | 0.014652 |
| Gpalpp1       | chr14:76086231-76110815   | 21.3103  | 18.5488  | -0.2002 | 0.031130 |
| Amigo2        | chr15:97244073-97247287   | 33.2492  | 26.7360  | -0.3145 | 0.116897 |
| Hnrnpa3       | chr2:75659260-75669407    | 3.8752   | 4.9628   | 0.3569  | 0.053678 |
| Cbx4          | chr11:119077572-119086221 | 28.1600  | 24.5585  | -0.1974 | 0.044612 |
| B330016D10Rik | chr4:141546188-141547892  | 7.3239   | 5.6850   | -0.3654 | 0.016859 |
| Scarna9       | chr9:15326263-15326333    | 61.5768  | 91.5128  | 0.5716  | 0.030197 |
| Whsc1         | chr5:33820724-33897975    | 3.6012   | 4.8054   | 0.4162  | 0.092576 |
| E030018B13Rik | chr7:63916856-63920539    | 4.7836   | 7.2478   | 0.5995  | 0.040420 |
| Cdr2          | chr7:120957035-120982312  | 7.5123   | 5.5818   | -0.4285 | 0.067311 |
| Prdm1         | chr10:44437176-44528501   | 1.7366   | 2.4162   | 0.4765  | 0.072354 |
| Llg12         | chr11:115824048-115855780 | 7.3854   | 6.4023   | -0.2061 | 0.013013 |
| Tm7sf2        | chr19:6062820-6068373     | 6.5743   | 5.4949   | -0.2588 | 0.013202 |
| Rbm12b1       | chr4:12140263-12146731    | 7.8480   | 6.0958   | -0.3645 | 0.088479 |
| Papd4         | chr13:93147399-93192283   | 6.7672   | 8.5075   | 0.3302  | 0.003713 |
| Tcf20         | chr15:82808628-82912134   | 136.9479 | 121.2926 | -0.1751 | 0.041619 |
| Axin1         | chr17:26138687-26195811   | 37.1679  | 33.0261  | -0.1705 | 0.035024 |
| Zfp821        | chr8:109705548-109724932  | 1.8538   | 2.7320   | 0.5594  | 0.028193 |
| Hivep1        | chr13:42052020-42185026   | 6.3929   | 8.4812   | 0.4078  | 0.120466 |
| Ppan          | chr9:20888174-20892178    | 27.3387  | 24.2860  | -0.1708 | 0.012414 |
| Plxnc1        | chr10:94790865-94944578   | 5.6458   | 6.7950   | 0.2673  | 0.025735 |
| 2610024D14Rik | chr11:21099533-21099827   | 11.7931  | 18.4378  | 0.6447  | 0.055845 |
| C330027C09Rik | chr16:48994184-49019709   | 1.3747   | 1.8883   | 0.4580  | 0.031242 |
| Klf11         | chr12:24651370-24662774   | 3.0560   | 4.4208   | 0.5327  | 0.096354 |
| Mri1          | chr8:84249905-84257326    | 16.7382  | 14.8596  | -0.1718 | 0.006594 |
| Ets2          | chr16:95702074-95721051   | 14.8658  | 13.0133  | -0.1920 | 0.034162 |
| Ms4a4c        | chr19:11404769-11427246   | 20.8921  | 27.3259  | 0.3873  | 0.062420 |
| Arid5b        | chr10:68095592-68278726   | 7.7082   | 10.3502  | 0.4252  | 0.122197 |
| Ggt5          | chr10:75589380-75616968   | 14.2365  | 11.7002  | -0.2831 | 0.083282 |
| Avpr2         | chrX:73892101-73895502    | 51.1525  | 44.9390  | -0.1868 | 0.047228 |
| Ap3d1         | chr10:80706977-80742211   | 46.6103  | 42.4129  | -0.1361 | 0.020128 |

|                      |                           |           |           |         |          |
|----------------------|---------------------------|-----------|-----------|---------|----------|
| <i>Pes1</i>          | chr11:3963974-3980004     | 23.7522   | 20.7425   | -0.1955 | 0.020299 |
| <i>Plrg1</i>         | chr3:83055521-83072355    | 30.4190   | 26.5565   | -0.1959 | 0.024762 |
| <i>Bcl9</i>          | chr3:97203661-97228846    | 1.4909    | 1.9551    | 0.3911  | 0.044672 |
| <i>Dvl2</i>          | chr11:70000594-70012301   | 16.4418   | 14.7935   | -0.1524 | 0.013761 |
| <i>Rnf167</i>        | chr11:70647234-70651421   | 115.2445  | 103.2946  | -0.1579 | 0.029556 |
| <i>Mrpl38</i>        | chr11:116131816-116138868 | 11.8149   | 10.2207   | -0.2091 | 0.000773 |
| <i>Dhx15</i>         | chr5:52150208-52190519    | 165.9889  | 149.0649  | -0.1551 | 0.026695 |
| <i>Pex26</i>         | chr6:121183666-121198837  | 3.7817    | 3.1429    | -0.2670 | 0.021253 |
| <i>Btbd1</i>         | chr7:81792074-81829431    | 18.6947   | 16.0947   | -0.2160 | 0.029229 |
| <i>Ubxn7</i>         | chr16:32332251-32393747   | 19.0387   | 22.1846   | 0.2206  | 0.026150 |
| <i>Nxpe3</i>         | chr16:55839952-55895279   | 9.1601    | 11.6214   | 0.3433  | 0.076607 |
| <i>Cd84</i>          | chr1:171839696-171890718  | 36.5087   | 41.4295   | 0.1824  | 0.016614 |
| <i>Cnot6l</i>        | chr5:96070332-96164171    | 24.4651   | 27.7331   | 0.1809  | 0.014960 |
| <i>Lsr</i>           | chr7:30957408-30983169    | 4.0089    | 4.9656    | 0.3088  | 0.028797 |
| <i>Ran</i>           | chr5:129020068-129024323  | 25.1002   | 21.5933   | -0.2171 | 0.029107 |
| <i>Tomm20</i>        | chr8:126930663-126945921  | 11.5402   | 10.3071   | -0.1630 | 0.001455 |
| <i>Golgb1</i>        | chr16:36875139-36933085   | 10.9745   | 12.6436   | 0.2043  | 0.024654 |
| <i>Arhgap1</i>       | chr2:91649859-91672326    | 56.9284   | 52.0318   | -0.1298 | 0.013158 |
| <i>Fgr</i>           | chr4:132974094-133001910  | 0.8241    | 1.2757    | 0.6303  | 0.037171 |
| <i>Kjfc5b</i>        | chr17:26917090-26932579   | 2.9273    | 2.1998    | -0.4122 | 0.010687 |
| <i>Adam10</i>        | chr9:70678996-70780229    | 21.5599   | 24.9078   | 0.2082  | 0.014545 |
| <i>Itga5</i>         | chr15:103344288-103366763 | 0.7746    | 1.2028    | 0.6349  | 0.035515 |
| <i>Tecr</i>          | chr8:83571699-83594491    | 70.8658   | 60.7756   | -0.2216 | 0.057741 |
| <i>Frmf4b</i>        | chr6:97286866-97617541    | 0.4773    | 0.6947    | 0.5416  | 0.061072 |
| <i>Kras</i>          | chr6:145216698-145250239  | 21.3379   | 25.2928   | 0.2453  | 0.032658 |
| <i>Ndufv1</i>        | chr19:4007496-4012806     | 32.0699   | 28.2932   | -0.1808 | 0.027373 |
| <i>Atxn7l1os2</i>    | chr12:33358242-33394760   | 2.4866    | 3.6529    | 0.5549  | 0.057095 |
| <i>Nsun5</i>         | chr5:135369952-135376805  | 10.0973   | 8.5489    | -0.2402 | 0.038523 |
| <i>Tspan14</i>       | chr14:40906444-40966807   | 56.0592   | 50.3194   | -0.1558 | 0.032215 |
| <i>Taf8</i>          | chr17:47488049-47502287   | 29.5006   | 26.1024   | -0.1766 | 0.024167 |
| <i>Zfp35</i>         | chr18:23989631-24005376   | 7.2874    | 8.7912    | 0.2707  | 0.003065 |
| <i>Anapc2</i>        | chr2:25272477-25285915    | 11.3010   | 14.2532   | 0.3348  | 0.065398 |
| <i>Gpr155</i>        | chr2:73341505-73386572    | 4.1103    | 5.8996    | 0.5214  | 0.127174 |
| <i>Ehd4</i>          | chr2:120089174-120154606  | 1.4099    | 1.9505    | 0.4682  | 0.012392 |
| <i>Raly</i>          | chr2:154791095-154867261  | 92.1373   | 79.3623   | -0.2153 | 0.054350 |
| <i>Rcan3</i>         | chr4:135412307-135433853  | 27.5418   | 24.8041   | -0.1510 | 0.016187 |
| <i>Tusc2</i>         | chr9:107563254-107566108  | 23.0966   | 19.9006   | -0.2149 | 0.014918 |
| <i>Trib1</i>         | chr15:59648349-59656550   | 0.8061    | 1.2397    | 0.6210  | 0.060100 |
| <i>Gm15964</i>       | chr16:91611467-91623861   | 13.8936   | 11.8483   | -0.2297 | 0.031811 |
| <i>Atp5a1</i>        | chr18:7773728-77782869    | 226.1073  | 199.5023  | -0.1806 | 0.039215 |
| <i>1700123O20Rik</i> | chr14:54686170-54690742   | 29.2462   | 25.8978   | -0.1754 | 0.009337 |
| <i>Galnt6</i>        | chr15:100691812-100729376 | 129.3810  | 117.2099  | -0.1425 | 0.022387 |
| <i>A630001G21Rik</i> | chr1:85717082-85778643    | 10.4491   | 12.7908   | 0.2917  | 0.032739 |
| <i>Aptx</i>          | chr4:40682381-40703194    | 3.9246    | 4.7376    | 0.2716  | 0.007332 |
| <i>Zfp839</i>        | chr12:110850278-110869998 | 1.2748    | 1.7968    | 0.4952  | 0.010662 |
| <i>4930481A15Rik</i> | chr19:5406739-5422847     | 5.1110    | 6.8159    | 0.4153  | 0.039512 |
| <i>Aar2</i>          | chr2:156547583-156568972  | 12.7137   | 11.1975   | -0.1832 | 0.006347 |
| <i>Ust</i>           | chr10:8204752-8518825     | 1.7516    | 2.3778    | 0.4409  | 0.029909 |
| <i>Asxl2</i>         | chr12:3426856-3506852     | 13.7704   | 15.7742   | 0.1960  | 0.021721 |
| <i>Atpaf2</i>        | chr11:60400625-60418457   | 16.7041   | 14.3741   | -0.2167 | 0.014811 |
| <i>Dnajb9</i>        | chr12:44205896-44210068   | 5.3012    | 7.4509    | 0.4911  | 0.076674 |
| <i>1700023H06Rik</i> | chr13:80884223-80885524   | 6.0206    | 8.9971    | 0.5795  | 0.091504 |
| <i>Actb</i>          | chr5:142903114-142906754  | 3375.4583 | 2944.8449 | -0.1969 | 0.060402 |
| <i>Shisa5</i>        | chr9:109038564-109057724  | 911.3792  | 807.2861  | -0.1750 | 0.059100 |
| <i>Sart1</i>         | chr19:5377522-5388703     | 35.8227   | 32.8919   | -0.1231 | 0.007248 |
| <i>Psen2</i>         | chr1:180227003-180263438  | 23.9038   | 21.0452   | -0.1837 | 0.043988 |
| <i>Ftsj3</i>         | chr11:106249141-106256079 | 40.9512   | 36.9799   | -0.1472 | 0.018036 |
| <i>1700030K09Rik</i> | chr8:72443879-72461001    | 2.6561    | 3.5343    | 0.4121  | 0.016686 |
| <i>Gm13563</i>       | chr2:26381525-26389018    | 39.3511   | 34.8112   | -0.1769 | 0.011695 |
| <i>Birc5</i>         | chr11:117849250-117855743 | 1.1950    | 1.8774    | 0.6517  | 0.084982 |
| <i>Hs3st3b1</i>      | chr11:63885791-63922290   | 20.0042   | 17.5904   | -0.1855 | 0.058596 |
| <i>Ddx3x</i>         | chrX:13280969-13294052    | 92.8492   | 107.9274  | 0.2171  | 0.021512 |
| <i>Tmem129</i>       | chr5:33653215-33657977    | 11.6807   | 10.0546   | -0.2163 | 0.020476 |
| <i>Emc10</i>         | chr7:44489936-44496529    | 28.3103   | 25.1142   | -0.1728 | 0.036790 |
| <i>Gm16364</i>       | chr10:39556070-39558062   | 4.3968    | 6.5048    | 0.5651  | 0.085456 |
| <i>BC049715</i>      | chr6:136828842-136840536  | 4.8955    | 3.5398    | -0.4678 | 0.002900 |
| <i>Mrpl34</i>        | chr8:71464925-71465752    | 34.6950   | 27.5426   | -0.3331 | 0.048899 |
| <i>Naa50</i>         | chr16:44139829-44163366   | 9.4111    | 11.3590   | 0.2714  | 0.027055 |
| <i>Igsf6</i>         | chr7:121064066-121074530  | 3.4609    | 4.5982    | 0.4099  | 0.009811 |
| <i>Grik5</i>         | chr7:25009852-25072369    | 0.8211    | 1.3134    | 0.6776  | 0.056727 |
| <i>Scmh1</i>         | chr4:120405280-120530186  | 1.0583    | 1.4281    | 0.4323  | 0.042017 |

|                      |                           |          |          |         |          |
|----------------------|---------------------------|----------|----------|---------|----------|
| <i>Insig1</i>        | chr5:28071362-28078662    | 24.2196  | 20.2870  | -0.2556 | 0.060086 |
| <i>Tmem9b</i>        | chr7:109735833-109752875  | 59.2318  | 51.1111  | -0.2127 | 0.041170 |
| <i>Gm17017</i>       | chr1:85641221-85650585    | 1.9953   | 2.7784   | 0.4776  | 0.013128 |
| <i>Ybx3</i>          | chr6:131364857-131388450  | 6.6713   | 9.5580   | 0.5187  | 0.123890 |
| <i>Hsd1l</i>         | chr8:119561978-119575200  | 60.3325  | 54.8717  | -0.1369 | 0.009869 |
| <i>Arf4</i>          | chr14:26638073-26665084   | 13.5104  | 16.4114  | 0.2806  | 0.028166 |
| <i>Fam92a</i>        | chr4:12153408-12172015    | 2.1489   | 2.8092   | 0.3865  | 0.030579 |
| <i>Gm17108</i>       | chr13:69610497-69614901   | 7.4244   | 6.1505   | -0.2716 | 0.026970 |
| <i>Zc3h10</i>        | chr10:128541962-128547774 | 11.1833  | 9.9052   | -0.1751 | 0.008736 |
| <i>Kcnh2</i>         | chr5:24319588-24351604    | 3.1581   | 2.5335   | -0.3179 | 0.043896 |
| <i>Cd200</i>         | chr16:45382134-45409053   | 4.9811   | 6.7881   | 0.4466  | 0.102722 |
| <i>A430093F15Rik</i> | chr19:10740946-10786043   | 8.8712   | 12.5493  | 0.5004  | 0.103754 |
| <i>Rbm12</i>         | chr2:156091957-156111978  | 20.4004  | 17.5945  | -0.2135 | 0.073235 |
| <i>Alg5</i>          | chr3:54735538-54751127    | 7.3107   | 8.7492   | 0.2591  | 0.005602 |
| <i>Gm26546</i>       | chr10:88379243-88383711   | 1.4314   | 2.0066   | 0.4874  | 0.042993 |
| <i>Rasa1</i>         | chr13:85214779-85289029   | 34.0846  | 39.7412  | 0.2215  | 0.041500 |
| <i>NA</i>            | chr5:36796227-36797729    | 9.6869   | 7.7759   | -0.3170 | 0.030968 |
| <i>Gnai2</i>         | chr9:107614137-107635342  | 219.6732 | 194.9975 | -0.1719 | 0.039597 |
| <i>Mettl3</i>        | chr14:52294667-52305128   | 31.0641  | 28.0864  | -0.1454 | 0.016180 |
| <i>Zbtb11</i>        | chr16:55966274-56008913   | 27.6433  | 24.5278  | -0.1725 | 0.054290 |
| <i>Tcf4</i>          | chr18:69344145-69687967   | 0.3551   | 0.5011   | 0.4969  | 0.013930 |
| <i>Zfp704</i>        | chr3:9427010-9610085      | 0.2374   | 0.4712   | 0.9889  | 0.165942 |
| <i>Mum1</i>          | chr10:80226433-80243903   | 18.0587  | 15.9056  | -0.1832 | 0.054553 |
| <i>St3gal6</i>       | chr16:58468124-58524243   | 2.7975   | 3.5033   | 0.3246  | 0.018407 |
| <i>Lypd6b</i>        | chr2:49787687-49948849    | 12.3563  | 10.0445  | -0.2988 | 0.068319 |
| <i>Ccdc117</i>       | chr11:5528886-5542187     | 21.7894  | 18.4547  | -0.2396 | 0.066256 |
| <i>Lemd2</i>         | chr17:27189600-27204438   | 25.5064  | 22.6145  | -0.1736 | 0.035302 |
| <i>Cuedc1</i>        | chr11:88098057-88194140   | 0.6472   | 0.9285   | 0.5208  | 0.006857 |
| <i>Pip5k1a</i>       | chr3:95058529-95106930    | 18.7398  | 16.6434  | -0.1712 | 0.015756 |
| <i>Bpnt1</i>         | chr1:185332148-185357777  | 9.6091   | 7.7898   | -0.3028 | 0.038507 |
| <i>Anapc16</i>       | chr10:59987408-60003135   | 19.1560  | 16.5300  | -0.2127 | 0.046894 |
| <i>Esyt1</i>         | chr10:128510247-128525859 | 186.8930 | 165.0768 | -0.1791 | 0.082804 |
| <i>Usp34</i>         | chr11:23306894-23490560   | 14.9843  | 17.6888  | 0.2394  | 0.073678 |
| <i>Rel</i>           | chr11:23741513-23770970   | 6.2401   | 8.0650   | 0.3701  | 0.057163 |
| <i>Sap30l</i>        | chr11:57801636-57810217   | 22.9658  | 18.9835  | -0.2747 | 0.066065 |
| <i>Lrrc75a</i>       | chr11:62604883-62648523   | 4.2080   | 5.6613   | 0.4280  | 0.043945 |
| <i>Rrm2</i>          | chr12:24708240-24714146   | 2.6077   | 3.8931   | 0.5782  | 0.102966 |
| <i>9330151L19Rik</i> | chr12:69197210-69199868   | 13.4011  | 11.5712  | -0.2118 | 0.025317 |
| <i>Nsun2</i>         | chr13:69533745-69635780   | 32.3913  | 29.5016  | -0.1348 | 0.011320 |
| <i>Eif4h</i>         | chr5:134619879-134639348  | 112.1676 | 100.9164 | -0.1525 | 0.036998 |
| <i>Ppfibp1</i>       | chr6:146888486-147032025  | 0.9105   | 1.3617   | 0.5807  | 0.136808 |
| <i>Igsf23</i>        | chr7:19937304-19950743    | 21.3166  | 17.3827  | -0.2943 | 0.070136 |
| <i>Nav2</i>          | chr7:49246188-49610087    | 0.5376   | 0.8853   | 0.7198  | 0.111723 |
| <i>Isyna1</i>        | chr8:70594480-70597288    | 37.9350  | 33.1557  | -0.1943 | 0.041559 |
| <i>Acsf3</i>         | chr8:122775504-122817880  | 4.0371   | 5.5233   | 0.4522  | 0.050227 |
| <i>Ankrd12</i>       | chr17:65967500-66077089   | 14.4944  | 17.0037  | 0.2304  | 0.039122 |
| <i>Mrps26</i>        | chr2:130563741-130568695  | 11.9314  | 10.4148  | -0.1961 | 0.030470 |
| <i>Pmepa1</i>        | chr2:173224457-173276533  | 1.7739   | 2.3717   | 0.4190  | 0.035898 |
| <i>Atp1a1</i>        | chr3:101576218-101604603  | 119.0321 | 107.6660 | -0.1448 | 0.038694 |
| <i>Tgfb1</i>         | chr4:47353221-47414931    | 16.4034  | 14.6319  | -0.1649 | 0.043625 |
| <i>E130308A19Rik</i> | chr4:59626210-59761439    | 0.7086   | 0.9890   | 0.4810  | 0.088558 |
| <i>Zfp46</i>         | chr4:136284682-136293942  | 7.3636   | 6.4284   | -0.1960 | 0.018015 |
| <i>Agri</i>          | chr4:156165289-156197488  | 1.2679   | 1.7919   | 0.4991  | 0.120815 |
| <i>Capns1</i>        | chr7:30186941-30195164    | 57.1657  | 49.1856  | -0.2169 | 0.062753 |
| <i>Pcdhgc4</i>       | chr18:37674334-37841873   | 0.5531   | 0.7207   | 0.3819  | 0.075589 |
| <i>Ggnbp1</i>        | chr17:26973216-27036378   | 18.5495  | 16.8686  | -0.1370 | 0.005700 |
| <i>Atxn7l1</i>       | chr12:33147692-33375659   | 4.8703   | 6.3143   | 0.3746  | 0.119918 |
| <i>Hmgn2</i>         | chr4:133964737-133968650  | 3.3572   | 4.3312   | 0.3675  | 0.015875 |
| <i>Polm</i>          | chr11:5827859-5838016     | 4.2635   | 5.4443   | 0.3527  | 0.053709 |
| <i>Gm11508</i>       | chr11:88011990-88048006   | 49.4574  | 41.5265  | -0.2522 | 0.019901 |
| <i>Prpf31</i>        | chr7:3629984-3642486      | 19.6330  | 17.3782  | -0.1760 | 0.028738 |
| <i>Tmem160</i>       | chr7:16452778-16455489    | 27.0775  | 21.8030  | -0.3126 | 0.063032 |
| <i>Zfp36</i>         | chr7:28376783-28379255    | 33.7778  | 43.3116  | 0.3587  | 0.094341 |
| <i>Tyropb</i>        | chr7:30413787-30417577    | 7.4088   | 11.2208  | 0.5989  | 0.042024 |
| <i>Tmem161a</i>      | chr8:70172355-70183681    | 10.9103  | 9.6569   | -0.1761 | 0.002569 |
| <i>Lsm4</i>          | chr8:70673247-70678752    | 71.4424  | 60.6363  | -0.2366 | 0.066012 |
| <i>Ldlr</i>          | chr9:21723575-21749916    | 19.3006  | 14.9383  | -0.3696 | 0.126801 |
| <i>Rgcc</i>          | chr14:79288755-79301645   | 34.7764  | 25.9997  | -0.4196 | 0.106419 |
| <i>Rgs11</i>         | chr17:26202950-26211324   | 6.5127   | 5.5947   | -0.2192 | 0.005310 |
| <i>Nrip1</i>         | chr16:76287399-76373827   | 15.4681  | 17.7645  | 0.1997  | 0.033427 |
| <i>Malt1</i>         | chr18:65430962-65478823   | 45.1583  | 52.0975  | 0.2062  | 0.041531 |

|                      |                           |           |           |         |          |
|----------------------|---------------------------|-----------|-----------|---------|----------|
| <i>Ifih1</i>         | chr2:62595797-62646255    | 9.4085    | 12.0604   | 0.3582  | 0.089072 |
| <i>Rprd2</i>         | chr3:95759872-95818953    | 9.0279    | 10.8644   | 0.2672  | 0.073536 |
| <i>Bach2</i>         | chr4:32238803-32586108    | 9.1863    | 12.1866   | 0.4077  | 0.163486 |
| <i>Kti12</i>         | chr4:108847856-108849412  | 26.0863   | 22.2332   | -0.2306 | 0.041388 |
| <i>Xiap</i>          | chrX:42059678-42109656    | 11.5679   | 13.2701   | 0.1980  | 0.019444 |
| <i>Dph1</i>          | chr11:75177642-75191241   | 17.1296   | 15.1151   | -0.1805 | 0.010806 |
| <i>Ncor2</i>         | chr5:125017152-125179219  | 2.5902    | 3.4309    | 0.4055  | 0.103058 |
| <i>Cpsf4</i>         | chr5:145167212-145182041  | 16.8738   | 15.2116   | -0.1496 | 0.002778 |
| <i>Anxa6</i>         | chr11:54979107-55033445   | 256.5232  | 231.5039  | -0.1481 | 0.039643 |
| <i>Pnpo</i>          | chr11:96937824-96943986   | 14.1383   | 12.3097   | -0.1998 | 0.017326 |
| <i>Mob1b</i>         | chr5:88720854-88762058    | 2.4354    | 2.9115    | 0.2576  | 0.012849 |
| <i>Txlng</i>         | chrX:162778918-162829454  | 4.6732    | 5.6492    | 0.2736  | 0.024480 |
| <i>Lancl1</i>        | chr1:67000516-67038872    | 11.6268   | 10.2966   | -0.1753 | 0.016337 |
| <i>Rbm38</i>         | chr2:173020497-173034734  | 52.3035   | 44.2561   | -0.2410 | 0.098582 |
| <i>Fdps</i>          | chr3:89093591-89101967    | 19.0429   | 15.0174   | -0.3426 | 0.083636 |
| <i>Pus1</i>          | chr4:155887878-155891781  | 17.0836   | 14.9685   | -0.1907 | 0.008888 |
| <i>Oprm1</i>         | chr10:6758505-7038198     | 1.0796    | 1.4238    | 0.3993  | 0.034584 |
| <i>Fam207a</i>       | chr10:77486655-77515813   | 20.9478   | 18.3877   | -0.1881 | 0.023242 |
| <i>Per1</i>          | chr11:69095216-69109960   | 2.8523    | 3.8226    | 0.4224  | 0.089442 |
| <i>Agpat6</i>        | chr8:23172945-23208453    | 21.1759   | 19.1163   | -0.1476 | 0.006624 |
| <i>Diap3</i>         | chr14:86655366-87141224   | 0.8510    | 1.3338    | 0.6482  | 0.062943 |
| <i>B3galt4</i>       | chr17:33949913-33951488   | 24.6145   | 21.6496   | -0.1852 | 0.004715 |
| <i>Znhit2</i>        | chr19:6061191-6062470     | 17.6718   | 13.9311   | -0.3431 | 0.080096 |
| <i>Rgs1</i>          | chr1:144243971-144249242  | 3.0939    | 6.1847    | 0.9993  | 0.093301 |
| <i>Lamtor3</i>       | chr3:137918525-137928765  | 19.3957   | 16.3509   | -0.2464 | 0.019042 |
| <i>Rasgrf2</i>       | chr13:91880399-92131656   | 0.6732    | 1.0659    | 0.6630  | 0.083819 |
| <i>Ammecr1</i>       | chrX:142851145-142966728  | 2.2844    | 2.9200    | 0.3542  | 0.024424 |
| <i>Orai1</i>         | chr5:123015073-123030450  | 21.4231   | 18.6785   | -0.1978 | 0.044490 |
| <i>4933440N22Rik</i> | chr6:117907109-117907760  | 29.9120   | 24.4062   | -0.2935 | 0.042550 |
| <i>Dusp28</i>        | chr1:92906988-92908620    | 11.0299   | 8.9557    | -0.3006 | 0.034895 |
| <i>Galnt10</i>       | chr11:57645441-57787514   | 40.5895   | 36.1196   | -0.1683 | 0.047468 |
| <i>Grn</i>           | chr11:102430314-102437048 | 2.7657    | 3.8672    | 0.4836  | 0.083023 |
| <i>Pbrm1</i>         | chr14:31019137-31121592   | 32.0545   | 36.5240   | 0.1883  | 0.030808 |
| <i>Dcun1d1</i>       | chr3:35892104-35937445    | 5.7744    | 7.0808    | 0.2942  | 0.037094 |
| <i>Ahcy1</i>         | chr3:107663117-107696560  | 12.1821   | 14.7965   | 0.2805  | 0.052658 |
| <i>Taf15</i>         | chr11:83473085-83506743   | 9.4656    | 11.6387   | 0.2982  | 0.057162 |
| <i>Brms1l</i>        | chr12:55836365-55869735   | 14.9303   | 12.9487   | -0.2054 | 0.020114 |
| <i>Phldb3</i>        | chr7:24611327-24629288    | 7.1667    | 6.0059    | -0.2549 | 0.000809 |
| <i>Myg1</i>          | chr15:102331708-102338139 | 15.4956   | 13.7138   | -0.1762 | 0.006830 |
| <i>Anxa11</i>        | chr14:25842182-25886804   | 6.6961    | 8.6376    | 0.3673  | 0.095460 |
| <i>Zfp53</i>         | chr17:21491255-21509764   | 35.7108   | 40.4378   | 0.1793  | 0.000329 |
| <i>D17Wsu92e</i>     | chr17:27751231-27820558   | 39.0278   | 35.4594   | -0.1383 | 0.027088 |
| <i>Atp13a3</i>       | chr16:30312422-30388837   | 17.3790   | 20.5308   | 0.2404  | 0.063390 |
| <i>O610012G03Rik</i> | chr16:31948023-31948448   | 18.7784   | 14.1376   | -0.4095 | 0.024914 |
| <i>Pi4k2a</i>        | chr19:42090434-42122218   | 7.4406    | 8.7781    | 0.2385  | 0.007449 |
| <i>Mamdc4</i>        | chr2:25563114-25574845    | 7.9163    | 6.9128    | -0.1955 | 0.014420 |
| <i>Afp</i>           | chr5:90490713-90508907    | 7.1434    | 5.6218    | -0.3456 | 0.072445 |
| <i>Hnrnpul2</i>      | chr19:8819400-8834142     | 22.4233   | 26.2174   | 0.2255  | 0.055460 |
| <i>Nmd3</i>          | chr3:69721984-69749042    | 14.8876   | 18.2108   | 0.2907  | 0.032488 |
| <i>Sec24a</i>        | chr11:51692263-51763634   | 3.5729    | 4.5581    | 0.3513  | 0.088858 |
| <i>Gm24157</i>       | chr11:52099057-52099153   | 107.5221  | 83.5471   | -0.3640 | 0.025267 |
| <i>Evi2a</i>         | chr11:79526559-79530609   | 7.8926    | 10.0903   | 0.3544  | 0.059297 |
| <i>Myo9a</i>         | chr9:59750895-59928866    | 7.8306    | 9.1488    | 0.2245  | 0.045220 |
| <i>Gbp6</i>          | chr5:105270703-105293699  | 13.2167   | 16.8900   | 0.3538  | 0.083050 |
| <i>Cd274</i>         | chr19:29367454-29388095   | 12.4579   | 15.5272   | 0.3177  | 0.071795 |
| <i>Trabd</i>         | chr15:89075123-89087077   | 17.5705   | 15.8885   | -0.1452 | 0.029848 |
| <i>Crybg3</i>        | chr16:59490774-59555752   | 3.7528    | 4.4651    | 0.2507  | 0.009421 |
| <i>Gm10518</i>       | chr1:179803375-179804676  | 9.0955    | 7.0992    | -0.3575 | 0.050221 |
| <i>Cpne1</i>         | chr2:156071844-156111959  | 46.8975   | 42.9039   | -0.1284 | 0.027246 |
| <i>Tradd</i>         | chr8:105258285-105264609  | 19.5050   | 17.0599   | -0.1932 | 0.008125 |
| <i>H2-K1</i>         | chr17:33996016-34000333   | 1268.3983 | 1132.1108 | -0.1640 | 0.083334 |
| <i>Gm15440</i>       | chr13:51685528-51701041   | 5.0707    | 7.4388    | 0.5529  | 0.108021 |
| <i>Nap1l1</i>        | chr10:111473191-111498142 | 11.3108   | 13.4859   | 0.2538  | 0.026145 |
| <i>Dhrs13</i>        | chr11:78032279-78037866   | 6.8353    | 5.4056    | -0.3385 | 0.064536 |
| <i>Cyth1</i>         | chr11:118132018-118248592 | 109.0329  | 100.6309  | -0.1157 | 0.010168 |
| <i>3110056K07Rik</i> | chr12:70991614-71015832   | 25.7240   | 22.3133   | -0.2052 | 0.016964 |
| <i>Ppp2r5e</i>       | chr12:75450882-75596200   | 6.4644    | 8.0405    | 0.3148  | 0.052953 |
| <i>Cwc27</i>         | chr13:104631139-104817142 | 7.9375    | 9.4348    | 0.2493  | 0.001935 |
| <i>Fbxo21</i>        | chr5:117976769-118010191  | 11.1153   | 9.7543    | -0.1884 | 0.014255 |
| <i>Brca2</i>         | chr5:150522629-150569746  | 1.2498    | 1.5841    | 0.3420  | 0.038921 |
| <i>Ppp6r1</i>        | chr7:4631500-4658950      | 113.1886  | 104.0836  | -0.1210 | 0.023612 |

|                 |                           |          |          |         |          |
|-----------------|---------------------------|----------|----------|---------|----------|
| <i>Rasa3</i>    | chr8:13566949-13677603    | 172.8788 | 159.0189 | -0.1206 | 0.035825 |
| <i>Casp4</i>    | chr9:5308827-5336783      | 3.6758   | 7.6706   | 1.0613  | 0.072876 |
| <i>Gm16575</i>  | chr15:79739573-79741798   | 31.0116  | 27.1422  | -0.1923 | 0.039376 |
| <i>Men1</i>     | chr19:6334978-6340891     | 17.5256  | 15.6036  | -0.1676 | 0.020148 |
| <i>Otub1</i>    | chr19:7198201-7206316     | 36.3816  | 32.0644  | -0.1822 | 0.034373 |
| <i>Uck2</i>     | chr1:167226089-167285127  | 53.1473  | 44.8252  | -0.2457 | 0.067325 |
| <i>Taf3</i>     | chr2:9914551-10048596     | 3.6940   | 4.5342   | 0.2957  | 0.040921 |
| <i>Gtdc1</i>    | chr2:44564411-44927657    | 3.2338   | 3.8698   | 0.2590  | 0.015090 |
| <i>Prnp</i>     | chr2:131909927-131938429  | 1.4386   | 2.5366   | 0.8183  | 0.128630 |
| <i>Rbm8a</i>    | chr3:96629927-96633779    | 10.1193  | 12.3548  | 0.2880  | 0.030662 |
| <i>Nexn</i>     | chr3:152236985-152266320  | 2.7459   | 3.8248   | 0.4781  | 0.051015 |
| <i>Tmod1</i>    | chr4:46038934-46116032    | 5.3843   | 4.4564   | -0.2729 | 0.026767 |
| <i>Atp6v1g1</i> | chr4:63544771-63550750    | 22.4618  | 18.1597  | -0.3067 | 0.053379 |
| <i>Ncmap</i>    | chr4:135369575-135398227  | 1.9357   | 3.0541   | 0.6579  | 0.096151 |
| <i>Icmt</i>     | chr4:152297226-152307121  | 12.2023  | 10.8407  | -0.1707 | 0.035122 |
| <i>Gm16153</i>  | chr10:4409032-4423369     | 2.1754   | 2.8288   | 0.3789  | 0.017607 |
| <i>Atxn1</i>    | chr13:45549757-45964991   | 3.7598   | 4.9610   | 0.4000  | 0.129632 |
| <i>Sema4d</i>   | chr13:51701245-51793747   | 16.4894  | 21.6584  | 0.3934  | 0.157908 |
| <i>Ccdc77</i>   | chr6:120324322-120364374  | 4.8069   | 4.2013   | -0.1943 | 0.004882 |
| <i>Tmem86b</i>  | chr7:4628041-4630482      | 12.6724  | 9.9664   | -0.3465 | 0.074327 |
| <i>Dctn5</i>    | chr7:122133040-122149044  | 31.5332  | 28.3370  | -0.1542 | 0.010867 |
| <i>Srcap</i>    | chr7:127512026-127536376  | 10.6898  | 13.7085  | 0.3588  | 0.124448 |
| <i>Tial1</i>    | chr7:128439776-128461717  | 13.7673  | 16.0147  | 0.2182  | 0.037785 |
| <i>Gm11175</i>  | chr8:70699537-70700080    | 214.3811 | 175.7654 | -0.2865 | 0.128772 |
| <i>Gpr114</i>   | chr8:94923693-94943290    | 2.0512   | 1.4910   | -0.4602 | 0.038012 |
| <i>Mthfs</i>    | chr9:89199378-89240226    | 1.5710   | 2.3964   | 0.6092  | 0.114467 |
| <i>Gm26882</i>  | chr9:90094177-90095902    | 4.9606   | 6.5733   | 0.4061  | 0.023609 |
| <i>Parp4</i>    | chr14:56575618-56659794   | 12.1371  | 14.9110  | 0.2970  | 0.111106 |
| <i>Rftn1</i>    | chr17:49992256-50190674   | 29.9642  | 27.1365  | -0.1430 | 0.020791 |
| <i>Acs3</i>     | chr1:78657824-78706987    | 7.6832   | 6.3504   | -0.2748 | 0.050471 |
| <i>Sestd1</i>   | chr2:77180339-77280592    | 0.9068   | 1.1668   | 0.3637  | 0.014838 |
| <i>Mfap1a</i>   | chr2:121491910-121506665  | 8.5461   | 10.1569  | 0.2491  | 0.015157 |
| <i>Dnaja1</i>   | chr4:40722149-40737149    | 15.2160  | 12.1486  | -0.3248 | 0.191860 |
| <i>Gpr65</i>    | chr12:98268634-98276624   | 21.7733  | 18.8432  | -0.2085 | 0.026723 |
| <i>Gm26669</i>  | chr12:80108033-80113000   | 17.6954  | 21.9919  | 0.3136  | 0.047937 |
| <i>Ano8</i>     | chr8:71476022-71486067    | 9.0071   | 7.5309   | -0.2582 | 0.059096 |
| <i>Ccl5</i>     | chr11:83525777-83530518   | 2.5031   | 8.6876   | 1.7952  | 0.080773 |
| <i>Gm17072</i>  | chr8:81827662-81829275    | 2.5454   | 3.8829   | 0.6093  | 0.055019 |
| <i>Gramd1b</i>  | chr9:40293232-40531383    | 6.6848   | 8.4383   | 0.3361  | 0.113916 |
| <i>Uqcr1</i>    | chr9:108936647-108949640  | 79.9960  | 72.1502  | -0.1489 | 0.019409 |
| <i>Rnf149</i>   | chr1:39551295-39577405    | 11.9113  | 14.3742  | 0.2712  | 0.045916 |
| <i>Nle1</i>     | chr11:82900767-82908411   | 9.5203   | 8.2329   | -0.2096 | 0.017027 |
| <i>Tmem165</i>  | chr5:76183879-76209245    | 29.3827  | 26.0256  | -0.1750 | 0.031395 |
| <i>Ptpn7</i>    | chr1:135132724-135145320  | 71.9791  | 64.9368  | -0.1485 | 0.040822 |
| <i>Tox</i>      | chr4:6686352-6991557      | 5.7972   | 7.4898   | 0.3696  | 0.106107 |
| <i>Wdr74</i>    | chr19:8735838-8740623     | 37.9241  | 33.3915  | -0.1836 | 0.017611 |
| <i>Ankrd54</i>  | chr15:79053093-79062893   | 9.1901   | 7.9696   | -0.2056 | 0.023369 |
| <i>Ccdc50</i>   | chr16:27388868-27452218   | 3.7931   | 4.9497   | 0.3840  | 0.105779 |
| <i>Mark3</i>    | chr12:111574509-111656227 | 46.6081  | 42.2363  | -0.1421 | 0.017428 |
| <i>Gtpbp6</i>   | chr5:110103974-110108197  | 19.1750  | 16.6020  | -0.2079 | 0.067818 |
| <i>Trbc2</i>    | chr6:41546729-41548181    | 945.4221 | 802.9835 | -0.2356 | 0.084235 |
| <i>Ilkap</i>    | chr1:91375830-91398783    | 66.7167  | 60.6488  | -0.1376 | 0.009170 |
| <i>Cdkn2c</i>   | chr4:109660875-109667189  | 2.9674   | 4.5558   | 0.6185  | 0.156377 |
| <i>Cdca4</i>    | chr12:112820236-112829389 | 36.5079  | 32.5572  | -0.1652 | 0.020420 |
| <i>E2f6</i>     | chr12:16810964-16826743   | 6.5608   | 5.4060   | -0.2793 | 0.016541 |
| <i>Rab5c</i>    | chr11:100715008-100738215 | 84.7108  | 75.8699  | -0.1590 | 0.036114 |
| <i>Zcchc11</i>  | chr4:108459425-108559421  | 15.7511  | 18.7302  | 0.2499  | 0.066304 |
| <i>Pcyox1</i>   | chr6:86386005-86397150    | 4.2126   | 3.4783   | -0.2763 | 0.037598 |
| <i>Coro2a</i>   | chr4:46536936-46602202    | 0.9913   | 1.5328   | 0.6287  | 0.139681 |
| <i>Zufsp</i>    | chr10:33926935-33951212   | 23.8544  | 27.1742  | 0.1880  | 0.001556 |
| <i>Alyref</i>   | chr11:120592120-120598365 | 21.5878  | 18.9012  | -0.1917 | 0.037564 |
| <i>Ap1s2</i>    | chrX:163909016-163933666  | 5.0383   | 6.2236   | 0.3048  | 0.054299 |
| <i>Ncoa6</i>    | chr2:155390655-155473894  | 3.8562   | 4.6799   | 0.2793  | 0.064038 |
| <i>Luzp1</i>    | chr4:136469760-136554780  | 1.3702   | 1.8150   | 0.4056  | 0.076642 |
| <i>Sema4f</i>   | chr6:82911884-82939769    | 4.3056   | 3.6117   | -0.2535 | 0.044889 |
| <i>NA</i>       | chr13:104173721-104178439 | 10.3448  | 12.4757  | 0.2702  | 0.001692 |
| <i>Nlrp1b</i>   | chr11:71153101-71230733   | 0.7878   | 1.1574   | 0.5549  | 0.050715 |
| <i>Rgmb</i>     | chr17:15806252-15826586   | 6.8753   | 5.6018   | -0.2955 | 0.060681 |
| <i>Zfp598</i>   | chr17:24669751-24682015   | 20.9781  | 18.3999  | -0.1892 | 0.052337 |
| <i>Selplg</i>   | chr5:113817797-113830501  | 210.3813 | 186.8940 | -0.1708 | 0.086192 |
| <i>Cenpe</i>    | chr3:135212562-135273540  | 1.1759   | 1.7882   | 0.6047  | 0.121330 |

|                      |                           |          |          |         |          |
|----------------------|---------------------------|----------|----------|---------|----------|
| <i>Armcx5</i>        | chrX:135742732-135747322  | 7.7179   | 8.9974   | 0.2213  | 0.003600 |
| <i>Ccnl2</i>         | chr4:155812488-155824543  | 85.8345  | 77.1476  | -0.1539 | 0.058453 |
| <i>Nacc2</i>         | chr2:26055534-26123220    | 4.9906   | 4.2713   | -0.2246 | 0.060349 |
| <i>4930562F07Rik</i> | chr1:160074734-160077985  | 87.3866  | 78.1803  | -0.1606 | 0.027859 |
| <i>Rpl38</i>         | chr11:114668523-114672331 | 8.8274   | 12.1050  | 0.4556  | 0.012830 |
| <i>Herpud1</i>       | chr8:94386437-94395377    | 63.2404  | 56.6531  | -0.1587 | 0.032433 |
| <i>Nfat5</i>         | chr8:107293469-107379517  | 3.1982   | 4.0456   | 0.3391  | 0.108761 |
| <i>Tmco6</i>         | chr18:36735067-36742391   | 20.0045  | 17.1554  | -0.2217 | 0.054879 |
| <i>Myh9</i>          | chr15:77760586-77842175   | 278.3476 | 249.9728 | -0.1551 | 0.065808 |
| <i>Prpf3</i>         | chr3:95830123-95855885    | 9.0791   | 10.6640  | 0.2321  | 0.029339 |
| <i>Lrrc14</i>        | chr15:76710622-76717699   | 6.9560   | 5.9945   | -0.2146 | 0.058560 |
| <i>Cbx2</i>          | chr11:119022961-119031270 | 4.5627   | 3.8051   | -0.2619 | 0.040407 |
| <i>Arhgap4</i>       | chrX:73891441-73921870    | 86.3459  | 77.4081  | -0.1576 | 0.070047 |
| <i>Gm19557</i>       | chr19:47512981-47516578   | 4.3017   | 5.4256   | 0.3349  | 0.024273 |
| <i>Trim26</i>        | chr17:36837133-36859398   | 15.5693  | 18.3188  | 0.2346  | 0.061370 |
| <i>Sec24d</i>        | chr3:123267495-123365635  | 4.9019   | 4.0458   | -0.2769 | 0.049980 |
| <i>H2-Ke6</i>        | chr17:34026032-34028060   | 72.2008  | 64.6536  | -0.1593 | 0.031925 |
| <i>D930007J09Rik</i> | chr13:32802456-32802849   | 20.0333  | 14.9200  | -0.4252 | 0.062161 |
| <i>Rpsa-ps11</i>     | chr4:59162267-59163156    | 14.1469  | 11.0079  | -0.3619 | 0.049054 |
| <i>Rasa4</i>         | chr5:136083915-136111860  | 0.5849   | 0.8276   | 0.5007  | 0.006850 |
| <i>Zfp871</i>        | chr17:32771235-32788287   | 20.7337  | 25.6593  | 0.3075  | 0.125992 |
| <i>Ubqln1</i>        | chr13:58176155-58215653   | 46.6238  | 42.1974  | -0.1439 | 0.028253 |
| <i>Jund</i>          | chr8:70697738-70700616    | 96.7975  | 81.3497  | -0.2508 | 0.123944 |
| <i>Nup50</i>         | chr15:84923427-84942955   | 24.9443  | 22.9549  | -0.1199 | 0.005538 |
| <i>Anp32b</i>        | chr4:46450901-46472657    | 7.0648   | 8.9498   | 0.3412  | 0.019557 |
| <i>Ptpn11</i>        | chr5:121130532-121191397  | 17.7066  | 21.9335  | 0.3088  | 0.121317 |
| <i>Panx1</i>         | chr9:15005160-15045478    | 27.6929  | 25.1920  | -0.1366 | 0.003383 |
| <i>Adamtsl4</i>      | chr3:95676200-95687917    | 2.1409   | 2.8168   | 0.3958  | 0.032300 |
| <i>Wrnip1</i>        | chr13:32802037-32822609   | 26.2706  | 23.3486  | -0.1701 | 0.031184 |
| <i>Adk</i>           | chr14:21052573-21448568   | 25.0367  | 30.3348  | 0.2769  | 0.062332 |
| <i>3110002H16Rik</i> | chr18:12168716-12189997   | 22.5668  | 20.5203  | -0.1372 | 0.018005 |
| <i>Fam212b</i>       | chr3:105704598-105720842  | 2.5152   | 3.3872   | 0.4294  | 0.059124 |
| <i>4930404N11Rik</i> | chr10:81363066-81365816   | 3.6865   | 2.7567   | -0.4193 | 0.026155 |
| <i>Pank3</i>         | chr11:35769483-35791285   | 27.3249  | 23.8482  | -0.1963 | 0.078483 |
| <i>Zbtb32</i>        | chr7:30589680-30598909    | 3.4747   | 5.3469   | 0.6218  | 0.149452 |
| <i>Tfip11</i>        | chr5:112326357-112338073  | 11.4192  | 13.5549  | 0.2473  | 0.036467 |
| <i>Polr2a</i>        | chr11:69733996-69758637   | 12.2350  | 15.1981  | 0.3129  | 0.129831 |
| <i>Ptpn18</i>        | chr1:34459745-34473775    | 111.0964 | 91.3951  | -0.2816 | 0.100456 |
| <i>Usp14</i>         | chr18:9995431-10045119    | 8.2034   | 9.4646   | 0.2063  | 0.006364 |
| <i>Ndufs3</i>        | chr2:90894633-90904827    | 20.3460  | 17.5931  | -0.2097 | 0.054373 |
| <i>Yars</i>          | chr4:129189759-129219607  | 8.2666   | 9.7477   | 0.2378  | 0.030376 |
| <i>Mcl1</i>          | chr3:95658720-95663176    | 240.8048 | 222.3084 | -0.1153 | 0.018388 |
| <i>Sh3bp5</i>        | chr14:31359879-31436078   | 17.2565  | 21.0299  | 0.2853  | 0.052912 |
| <i>Gm20518</i>       | chr16:17835276-17891671   | 19.4457  | 17.1280  | -0.1831 | 0.052523 |
| <i>Rsl24d1</i>       | chr9:73113425-73123333    | 10.6084  | 8.9491   | -0.2454 | 0.006526 |
| <i>Metrn</i>         | chr17:25794570-25797136   | 9.8318   | 8.0550   | -0.2876 | 0.025969 |
| <i>Lat</i>           | chr7:126363831-126369543  | 447.6287 | 394.9329 | -0.1807 | 0.069189 |
| <i>Hist1h2bh</i>     | chr13:23542923-23543359   | 8.4461   | 12.8726  | 0.6080  | 0.066242 |
| <i>BC005537</i>      | chr13:24801656-24814013   | 56.2601  | 64.4803  | 0.1967  | 0.042284 |
| <i>Jakmp1</i>        | chr5:37028334-37148001    | 27.3095  | 24.8575  | -0.1357 | 0.025767 |
| <i>Mpv17l2</i>       | chr8:70758648-70760921    | 18.6514  | 15.6378  | -0.2542 | 0.021198 |
| <i>Gm8822</i>        | chrX:81820383-81822730    | 5.1190   | 4.1304   | -0.3096 | 0.015452 |
| <i>Fam69a</i>        | chr5:107908052-107987085  | 24.0670  | 27.4076  | 0.1875  | 0.006777 |
| <i>Cops7a</i>        | chr6:124958412-124965538  | 14.3010  | 12.5752  | -0.1855 | 0.022201 |
| <i>Ppme1</i>         | chr7:100326736-100371896  | 17.7914  | 15.7759  | -0.1735 | 0.010358 |
| <i>Eij2b5</i>        | chr16:20498816-20509955   | 32.7617  | 28.8669  | -0.1826 | 0.061827 |
| <i>Gm14453</i>       | chr2:173025684-173034580  | 35.8091  | 28.8812  | -0.3102 | 0.091570 |
| <i>Gm13833</i>       | chr6:31102845-31104646    | 4.9297   | 7.1691   | 0.5403  | 0.031882 |
| <i>Stx4a</i>         | chr7:127824293-127849019  | 19.0428  | 22.0639  | 0.2124  | 0.021704 |
| <i>Prdm9</i>         | chr17:15543078-15564354   | 1.8229   | 2.4211   | 0.4094  | 0.032353 |
| <i>Traf1</i>         | chr2:34941749-34961772    | 28.0057  | 31.9947  | 0.1921  | 0.034442 |
| <i>Rpl3</i>          | chr15:80077780-80083406   | 98.0446  | 81.2672  | -0.2708 | 0.109255 |
| <i>Atp6v0c</i>       | chr17:24163865-24169702   | 1.6104   | 2.1619   | 0.4249  | 0.005716 |
| <i>Sjfn3</i>         | chr11:83191329-83215154   | 4.7089   | 6.1893   | 0.3944  | 0.038992 |
| <i>Tssk6</i>         | chr8:69902183-69903516    | 4.9910   | 3.6551   | -0.4494 | 0.057307 |
| <i>H60b</i>          | chr10:22158585-22288849   | 3.9479   | 6.0602   | 0.6183  | 0.105299 |
| <i>Dscr3</i>         | chr16:94497782-94526830   | 22.4476  | 19.8843  | -0.1749 | 0.035940 |
| <i>Ephb6</i>         | chr6:41605481-41620509    | 22.2801  | 19.4137  | -0.1987 | 0.088068 |
| <i>Slc39a3</i>       | chr10:81028537-81037426   | 10.8883  | 9.3770   | -0.2156 | 0.058492 |
| <i>Gm21971</i>       | chr12:102673016-102727333 | 2.3582   | 3.1209   | 0.4042  | 0.021185 |
| <i>Dusp4</i>         | chr8:34807296-34819894    | 1.4480   | 2.4007   | 0.7294  | 0.149528 |

|                      |                           |           |           |         |          |
|----------------------|---------------------------|-----------|-----------|---------|----------|
| <i>Capza1</i>        | chr3:104822778-104864505  | 25.4093   | 21.6411   | -0.2316 | 0.072973 |
| <i>Szrd1</i>         | chr4:141113000-141139775  | 38.0100   | 34.0798   | -0.1575 | 0.033339 |
| <i>Helz</i>          | chr11:107547929-107693826 | 5.9607    | 7.2524    | 0.2830  | 0.117278 |
| <i>Gm26571</i>       | chr12:83950689-83951355   | 13.5911   | 10.4493   | -0.3793 | 0.043313 |
| <i>9230104M06Rik</i> | chr12:112999963-113001926 | 5.1437    | 3.7398    | -0.4598 | 0.068109 |
| <i>Msh6</i>          | chr17:87975049-87990883   | 36.1756   | 31.9371   | -0.1798 | 0.083645 |
| <i>Fbxo45</i>        | chr16:32230111-32247158   | 7.7420    | 6.7247    | -0.2032 | 0.030775 |
| <i>Hlcs</i>          | chr16:94129194-94313563   | 6.7581    | 8.1990    | 0.2788  | 0.059101 |
| <i>Mfsd11</i>        | chr11:116852439-116875635 | 7.7900    | 6.7191    | -0.2134 | 0.082846 |
| <i>Emb</i>           | chr13:117220624-117274098 | 181.5643  | 158.1262  | -0.1994 | 0.072785 |
| <i>Nrbp1</i>         | chr5:31240863-31251566    | 58.5305   | 53.9152   | -0.1185 | 0.024675 |
| <i>Gm26625</i>       | chr6:47546665-47551704    | 1.2534    | 1.9071    | 0.6055  | 0.056732 |
| <i>Zfp747</i>        | chr7:127372563-127376050  | 10.3283   | 9.0321    | -0.1935 | 0.000981 |
| <i>Cd81</i>          | chr7:143052738-143067934  | 12.9334   | 10.8077   | -0.2590 | 0.060002 |
| <i>H2-K2</i>         | chr17:33974785-33978788   | 48.2771   | 42.4382   | -0.1860 | 0.051722 |
| <i>Ap5b1</i>         | chr19:5568073-5571261     | 18.1549   | 15.9168   | -0.1898 | 0.057881 |
| <i>Preb</i>          | chr5:30950852-30960330    | 13.6312   | 15.4848   | 0.1839  | 0.025346 |
| <i>A830010M20Rik</i> | chr5:107497377-107580596  | 2.8301    | 3.3997    | 0.2645  | 0.032953 |
| <i>Nfatc3</i>        | chr8:106059602-106130537  | 41.4038   | 49.0097   | 0.2433  | 0.078124 |
| <i>Sap130</i>        | chr18:31634370-31723061   | 9.1795    | 11.4154   | 0.3145  | 0.108900 |
| <i>Usp6nl</i>        | chr2:6322666-6446390      | 4.1759    | 5.2629    | 0.3338  | 0.109185 |
| <i>Anxa5</i>         | chr3:36448924-36475843    | 54.8177   | 46.9264   | -0.2242 | 0.072644 |
| <i>Ankra2</i>        | chr13:98263157-98274750   | 11.8312   | 13.6998   | 0.2116  | 0.008793 |
| <i>2310057M21Rik</i> | chr7:131342717-131362698  | 5.2209    | 6.4574    | 0.3066  | 0.005452 |
| <i>Cacnb1</i>        | chr11:98001507-98023034   | 5.2466    | 4.4113    | -0.2502 | 0.063978 |
| <i>Uggt1</i>         | chr1:36141529-36244305    | 44.3666   | 40.2751   | -0.1396 | 0.070652 |
| <i>Gm20458</i>       | chr2:164460966-164490760  | 15.5863   | 13.1839   | -0.2415 | 0.035714 |
| <i>Gm26917</i>       | chr17:39843012-39846341   | 2368.5799 | 1964.3141 | -0.2700 | 0.138642 |
| <i>Stambp</i>        | chr6:83543205-83572504    | 2.0816    | 2.8950    | 0.4759  | 0.037786 |
| <i>Cmah</i>          | chr13:24327419-24477285   | 37.4370   | 43.1498   | 0.2049  | 0.057227 |
| <i>Sertad3</i>       | chr7:27473767-27477359    | 16.7536   | 13.8413   | -0.2755 | 0.048459 |
| <i>B3galt2</i>       | chr1:143640663-143650406  | 1.0799    | 1.5374    | 0.5095  | 0.088495 |
| <i>Zc3h12d</i>       | chr10:7832469-7870397     | 20.6839   | 24.9941   | 0.2731  | 0.097369 |
| <i>Ralgapa1</i>      | chr12:55602928-55821167   | 18.3029   | 21.1023   | 0.2053  | 0.057955 |
| <i>Psme3</i>         | chr11:101316212-101323537 | 30.5711   | 27.6943   | -0.1426 | 0.017782 |
| <i>Abhd14a</i>       | chr9:106440050-106447678  | 3.2679    | 2.4039    | -0.4430 | 0.001301 |
| <i>Cct5</i>          | chr15:31590799-31601847   | 141.9896  | 124.9793  | -0.1841 | 0.063970 |
| <i>Desi1</i>         | chr15:81992522-82033862   | 4.1651    | 5.2776    | 0.3415  | 0.062462 |
| <i>Nol10</i>         | chr12:17348457-17430094   | 6.0759    | 7.3043    | 0.2657  | 0.015399 |
| <i>Psmb10</i>        | chr8:105935727-105938392  | 104.3382  | 90.9598   | -0.1980 | 0.089814 |
| <i>Mccc1</i>         | chr3:35959311-36000678    | 1.3368    | 1.7991    | 0.4285  | 0.111176 |
| <i>BC068281</i>      | chr12:4843302-4856925     | 3.7256    | 3.0380    | -0.2943 | 0.013508 |
| <i>Sptlc2</i>        | chr12:87305057-87388355   | 15.4052   | 13.8680   | -0.1517 | 0.063499 |
| <i>Iggap2</i>        | chr13:95627176-95891922   | 48.3790   | 45.2951   | -0.0950 | 0.004248 |
| <i>NA</i>            | chr4:6445037-6447912      | 1.9957    | 2.7840    | 0.4802  | 0.065398 |
| <i>Stra13</i>        | chr11:120710941-120713738 | 15.5783   | 12.3172   | -0.3389 | 0.050150 |
| <i>Cox8a</i>         | chr19:7215157-7217616     | 108.3801  | 90.3963   | -0.2618 | 0.091806 |
| <i>Knstrn</i>        | chr2:118814002-118853957  | 1.7845    | 2.2669    | 0.3452  | 0.019611 |
| <i>Fmr1</i>          | chrX:68678540-68717963    | 11.2123   | 12.7152   | 0.1815  | 0.022529 |
| <i>Lrrc8d</i>        | chr5:105699968-105832436  | 1.6003    | 2.0715    | 0.3723  | 0.099284 |
| <i>Ejf1</i>          | chr11:100319884-100322096 | 21.0446   | 27.7118   | 0.3970  | 0.172848 |
| <i>H2afz</i>         | chr3:137864486-137866922  | 5.5526    | 7.0393    | 0.3423  | 0.020850 |
| <i>Commd1</i>        | chr11:22834743-22982382   | 17.6989   | 20.0614   | 0.1808  | 0.022047 |
| <i>Nono</i>          | chrX:101429317-101448591  | 53.0932   | 47.2358   | -0.1686 | 0.058116 |
| <i>Snord35b</i>      | chr7:45123024-45123111    | 351.0670  | 307.0427  | -0.1933 | 0.011543 |
| <i>Gm23547</i>       | chr6:124715231-124715502  | 31.4921   | 41.6174   | 0.4022  | 0.059671 |
| <i>Zmynd19</i>       | chr2:24949791-24962075    | 4.9158    | 4.2195    | -0.2203 | 0.013546 |
| <i>Atp11b</i>        | chr3:35754133-35856274    | 40.6351   | 47.1143   | 0.2134  | 0.069506 |
| <i>Rcc2</i>          | chr4:140700540-140723220  | 55.2343   | 49.7421   | -0.1511 | 0.060693 |
| <i>Gm14966</i>       | chr19:6355521-6363759     | 8.2195    | 10.8574   | 0.4016  | 0.023710 |
| <i>Gm26690</i>       | chr7:127982569-127984881  | 3.2924    | 4.4706    | 0.4413  | 0.049980 |
| <i>Apc</i>           | chr18:34220923-34322189   | 10.3915   | 12.1623   | 0.2270  | 0.079604 |
| <i>Akirin1</i>       | chr4:123734558-123750345  | 21.3738   | 19.1169   | -0.1610 | 0.027201 |
| <i>Tcf12</i>         | chr9:71844251-72111819    | 43.5332   | 40.6057   | -0.1004 | 0.003255 |
| <i>Huwe1</i>         | chrX:151800806-151935417  | 26.4449   | 31.8002   | 0.2660  | 0.133584 |
| <i>Phactr2</i>       | chr10:13207716-13474396   | 0.8949    | 1.7237    | 0.9457  | 0.113164 |
| <i>Zrsr1</i>         | chr11:22972004-22976496   | 10.8528   | 12.7646   | 0.2341  | 0.038856 |
| <i>Cdk5r1</i>        | chr11:80477045-80481179   | 1.4517    | 2.1846    | 0.5896  | 0.167419 |
| <i>Dus1l</i>         | chr11:120789200-120796403 | 20.2742   | 18.4352   | -0.1372 | 0.014913 |
| <i>Lrrc8c</i>        | chr5:105519387-105613018  | 10.2886   | 12.2209   | 0.2483  | 0.071810 |
| <i>Wdr46</i>         | chr17:33940659-33949695   | 29.7496   | 27.1099   | -0.1341 | 0.014859 |

|                      |                           |         |         |         |          |
|----------------------|---------------------------|---------|---------|---------|----------|
| <i>Gpr160</i>        | chr3:30855949-30897192    | 0.9927  | 1.4132  | 0.5096  | 0.033753 |
| <i>Flcn</i>          | chr11:59791407-59810016   | 17.0611 | 15.0108 | -0.1847 | 0.080789 |
| <i>A530017D24Rik</i> | chr11:61864567-61868058   | 6.0598  | 7.3279  | 0.2741  | 0.014993 |
| <i>Pdp1f</i>         | chr2:181187246-181188771  | 22.4413 | 18.7307 | -0.2607 | 0.068218 |
| <i>Fxr2</i>          | chr11:69632989-69653297   | 24.2118 | 22.1180 | -0.1305 | 0.009643 |
| <i>Ccdc137</i>       | chr11:120458114-120464358 | 10.3488 | 9.0470  | -0.1940 | 0.038457 |
| <i>Rbm33</i>         | chr5:28317120-28419244    | 14.4499 | 17.3176 | 0.2612  | 0.106752 |
| <i>Itga4</i>         | chr2:79255425-79333123    | 43.0466 | 53.6252 | 0.3170  | 0.145060 |
| <i>Inpp1</i>         | chr7:101822632-101838226  | 1.4197  | 2.1138  | 0.5743  | 0.134997 |
| <i>Tbc1d8b</i>       | chrX:139684995-139753405  | 4.6364  | 5.5714  | 0.2650  | 0.039350 |
| <i>Xpr1</i>          | chr1:155275700-155417415  | 6.0051  | 6.7670  | 0.1723  | 0.011231 |
| <i>Dnajb13</i>       | chr7:100503017-100514960  | 5.7892  | 4.3961  | -0.3971 | 0.079026 |
| <i>Slc27a4</i>       | chr2:29802633-29817522    | 8.5840  | 7.3492  | -0.2241 | 0.067154 |
| <i>Gtf3c2</i>        | chr5:31151141-31180144    | 14.1788 | 16.6178 | 0.2290  | 0.060863 |
| <i>Ercc2</i>         | chr7:19382009-19395694    | 16.4951 | 14.8758 | -0.1491 | 0.039779 |
| <i>Gpaa1</i>         | chr15:76331230-76334907   | 13.7910 | 12.1219 | -0.1861 | 0.039099 |
| <i>Nagpa</i>         | chr16:5195288-5204012     | 16.3782 | 14.2786 | -0.1979 | 0.056015 |
| <i>Fam168b</i>       | chr1:34813218-34843065    | 87.2350 | 80.6880 | -0.1126 | 0.046746 |
| <i>Scarb2</i>        | chr5:92443872-92505608    | 48.6858 | 44.2051 | -0.1393 | 0.022574 |
| <i>Wdr20</i>         | chr12:110737948-110795028 | 18.1661 | 16.1407 | -0.1705 | 0.026965 |
| <i>Polg</i>          | chr7:79448790-79466362    | 33.8423 | 30.6334 | -0.1437 | 0.071845 |
| <i>Spon1</i>         | chr7:113765997-114043370  | 0.7881  | 1.0727  | 0.4449  | 0.048028 |
| <i>Zmiz1</i>         | chr14:25459184-25666743   | 2.3028  | 3.1069  | 0.4321  | 0.164447 |
| <i>Gpsm1</i>         | chr2:26315514-26348237    | 4.3491  | 3.6935  | -0.2357 | 0.059558 |
| <i>C92009B18Rik</i>  | chr10:22306701-22321765   | 3.2774  | 4.1792  | 0.3507  | 0.071944 |
| <i>Abcb8</i>         | chr5:24393662-24410054    | 6.0270  | 5.2606  | -0.1962 | 0.021913 |
| <i>Ppat</i>          | chr5:76913248-76951578    | 17.4810 | 15.4557 | -0.1776 | 0.047252 |
| <i>B230325K18Rik</i> | chr7:127983078-127985701  | 3.0663  | 4.0609  | 0.4053  | 0.052823 |
| <i>Ahsa1</i>         | chr12:87266745-87273997   | 78.8637 | 68.7882 | -0.1972 | 0.074522 |
| <i>Kctd18</i>        | chr1:57955100-58018956    | 5.8059  | 6.6202  | 0.1894  | 0.021379 |
| <i>Map3k3</i>        | chr11:106084612-106155446 | 73.5638 | 68.4820 | -0.1033 | 0.009628 |
| <i>Peak1</i>         | chr9:56201130-56418050    | 2.2938  | 2.9179  | 0.3472  | 0.121138 |
| <i>Acpp</i>          | chr9:104288250-104337728  | 2.2174  | 1.6465  | -0.4295 | 0.144996 |
| <i>Ecd</i>           | chr14:20319858-20348121   | 25.3781 | 22.7665 | -0.1567 | 0.042327 |
| <i>NA</i>            | chr19:8772521-8774467     | 61.0266 | 53.3689 | -0.1934 | 0.054910 |
| <i>St8sia6</i>       | chr2:13651019-13793808    | 21.4954 | 25.3807 | 0.2397  | 0.077146 |
| <i>Ddx24</i>         | chr12:103407975-103425867 | 58.0377 | 66.0735 | 0.1871  | 0.038782 |
| <i>Acat1</i>         | chr9:53580521-53610382    | 26.9836 | 23.8559 | -0.1777 | 0.059147 |
| <i>Snx4</i>          | chr16:33251455-33299562   | 65.4584 | 58.5122 | -0.1618 | 0.060272 |
| <i>Creld2</i>        | chr15:88819645-88826681   | 14.8569 | 12.6838 | -0.2282 | 0.017043 |
| <i>Cacna1a</i>       | chr8:84388439-84640246    | 0.4253  | 0.6295  | 0.5659  | 0.085047 |
| <i>Atcay</i>         | chr10:81204507-81230833   | 1.3945  | 2.0164  | 0.5320  | 0.140738 |
| <i>Snap47</i>        | chr11:59407133-59451186   | 11.1118 | 9.3881  | -0.2432 | 0.061128 |
| <i>Chrn1</i>         | chr11:69784035-69795943   | 2.1949  | 2.9717  | 0.4371  | 0.034052 |
| <i>Atad2b</i>        | chr12:4917403-5044047     | 18.7809 | 21.1774 | 0.1733  | 0.016104 |
| <i>Gm26583</i>       | chr12:112946362-112950512 | 4.3828  | 3.6615  | -0.2594 | 0.029414 |
| <i>Gatsl2</i>        | chr5:134099710-134144343  | 1.0768  | 1.4092  | 0.3882  | 0.034203 |
| <i>U2af2</i>         | chr7:5062142-5079945      | 56.0090 | 50.1528 | -0.1593 | 0.046015 |
| <i>Mrpl48</i>        | chr7:100545750-100608297  | 4.2434  | 3.6872  | -0.2027 | 0.010088 |
| <i>Zfp827</i>        | chr8:79028436-79193766    | 1.5830  | 2.0259  | 0.3559  | 0.076525 |
| <i>Pja1</i>          | chrX:99465733-99471273    | 27.1474 | 23.7807 | -0.1910 | 0.065519 |
| <i>Saysd1</i>        | chr14:20075645-20083172   | 9.1019  | 7.7961  | -0.2234 | 0.011570 |
| <i>Lrrc58</i>        | chr16:37868388-37888858   | 10.7454 | 12.4106 | 0.2079  | 0.050080 |
| <i>Upf2</i>          | chr2:5951468-6056703      | 16.9400 | 19.2959 | 0.1879  | 0.021283 |
| <i>Asx1</i>          | chr2:153345844-153404007  | 20.8044 | 24.3437 | 0.2267  | 0.094082 |
| <i>Tstd2</i>         | chr4:46114745-46138694    | 11.8057 | 10.5772 | -0.1585 | 0.023271 |
| <i>Nipal3</i>        | chr4:135446136-135495038  | 19.2924 | 17.2660 | -0.1601 | 0.101181 |
| <i>Def6</i>          | chr17:28207777-28228608   | 90.5737 | 82.4482 | -0.1356 | 0.055216 |
| <i>Cdk4</i>          | chr10:127063533-127067920 | 38.9458 | 34.5948 | -0.1709 | 0.069062 |
| <i>Snord15a</i>      | chr7:99482784-99482932    | 37.1790 | 50.7955 | 0.4502  | 0.049305 |
| <i>Acvrl1</i>        | chr15:101128521-101145336 | 15.6926 | 13.2395 | -0.2452 | 0.109565 |
| <i>Nsun3</i>         | chr16:62732443-62786818   | 3.3062  | 4.0425  | 0.2901  | 0.026623 |
| <i>Tiam1</i>         | chr16:89787110-89980080   | 3.0716  | 5.9703  | 0.9588  | 0.120309 |
| <i>Sh3bp2</i>        | chr5:34525837-34563638    | 3.6837  | 4.4655  | 0.2777  | 0.018797 |
| <i>Baz2a</i>         | chr10:128092782-128129303 | 21.2874 | 24.8865 | 0.2254  | 0.096608 |
| <i>Gnb4</i>          | chr3:32580331-32616585    | 2.8092  | 2.3087  | -0.2831 | 0.149127 |
| <i>4932438A13Rik</i> | chr3:36863105-37053033    | 26.1648 | 31.1403 | 0.2512  | 0.118972 |
| <i>Snrpd3</i>        | chr10:75518041-75535440   | 27.7911 | 34.8231 | 0.3254  | 0.052073 |
| <i>Fam173a</i>       | chr17:25790507-25792284   | 59.2383 | 52.2401 | -0.1814 | 0.049086 |
| <i>Nudt5</i>         | chr2:5845018-5871895      | 7.8737  | 6.8292  | -0.2053 | 0.069327 |
| <i>Bcl2l12</i>       | chr7:44991221-44998712    | 17.4706 | 15.0372 | -0.2164 | 0.071203 |



|                      |                           |          |          |         |          |
|----------------------|---------------------------|----------|----------|---------|----------|
| <i>Mrpl12</i>        | chr11:120484612-120489065 | 12.3116  | 15.5085  | 0.3330  | 0.083175 |
| <i>Dnajc7</i>        | chr11:100582817-100620168 | 46.9092  | 53.4255  | 0.1877  | 0.029055 |
| <i>Kat6b</i>         | chr14:21481433-21672478   | 3.0848   | 3.7889   | 0.2966  | 0.087721 |
| <i>Ifnar2</i>        | chr16:91372782-91405589   | 27.3121  | 24.9192  | -0.1323 | 0.035172 |
| <i>Ankrd50</i>       | chr3:38449260-38484844    | 11.2374  | 10.2957  | -0.1263 | 0.017164 |
| <i>Socs4</i>         | chr14:47276930-47296098   | 9.4013   | 10.5725  | 0.1694  | 0.000764 |
| <i>Cpd</i>           | chr11:76778423-76847018   | 0.4758   | 0.8240   | 0.7924  | 0.161145 |
| <i>Acadl</i>         | chr1:66830838-66863277    | 12.4920  | 14.7143  | 0.2362  | 0.022416 |
| <i>Dnttip2</i>       | chr3:122274413-122285269  | 35.6813  | 41.4241  | 0.2153  | 0.036827 |
| <i>Npc2</i>          | chr12:84754559-84773112   | 151.1337 | 131.8355 | -0.1971 | 0.104872 |
| <i>Ppp1r15a</i>      | chr7:45522915-45526268    | 10.6869  | 14.6510  | 0.4552  | 0.232532 |
| <i>Ankrd10</i>       | chr8:11611582-11635754    | 38.4759  | 34.7251  | -0.1480 | 0.069274 |
| <i>Ppp3cb</i>        | chr14:20499363-20546573   | 18.5675  | 20.7699  | 0.1617  | 0.013902 |
| <i>Plekha1</i>       | chr3:95988428-95996001    | 4.8743   | 6.8118   | 0.4829  | 0.152948 |
| <i>Mmg1</i>          | chrX:56585511-56598069    | 7.8594   | 9.2828   | 0.2401  | 0.034783 |
| <i>Arfgef1</i>       | chr1:10137570-10232670    | 18.3037  | 20.9157  | 0.1925  | 0.056378 |
| <i>Zbtb45</i>        | chr7:13004935-13009822    | 7.6996   | 6.4131   | -0.2638 | 0.061919 |
| <i>Gatb</i>          | chr3:85574118-85655622    | 4.4519   | 3.7591   | -0.2440 | 0.045713 |
| <i>Mis18bp1</i>      | chr12:65132733-65172604   | 0.6068   | 0.8634   | 0.5089  | 0.091495 |
| <i>Gm26786</i>       | chr8:106237902-106425728  | 2.5160   | 3.0264   | 0.2665  | 0.004683 |
| <i>Megf11</i>        | chr9:64385625-64709205    | 1.0399   | 1.3276   | 0.3524  | 0.078723 |
| <i>Pccb</i>          | chr9:100982031-101034898  | 11.0202  | 9.6229   | -0.1956 | 0.035332 |
| <i>Cd40lg</i>        | chrX:57212142-57224042    | 16.2683  | 19.5595  | 0.2658  | 0.032155 |
| <i>Otud5</i>         | chrX:7841363-7876626      | 40.5810  | 37.5700  | -0.1112 | 0.027234 |
| <i>Kifc2</i>         | chr15:76660640-76668196   | 5.1601   | 4.3545   | -0.2449 | 0.016318 |
| <i>Cars</i>          | chr7:143557229-143600090  | 12.2364  | 14.5801  | 0.2528  | 0.073089 |
| <i>Senp7</i>         | chr16:56075408-56190011   | 17.2975  | 19.6728  | 0.1856  | 0.017854 |
| <i>Adpgk</i>         | chr9:59291571-59316199    | 41.3240  | 36.9666  | -0.1608 | 0.095923 |
| <i>Ets1</i>          | chr9:32696041-32757820    | 744.5036 | 690.5387 | -0.1086 | 0.028653 |
| <i>Rtcb</i>          | chr10:85938636-85957823   | 74.0107  | 67.2481  | -0.1382 | 0.045916 |
| <i>B4galt7</i>       | chr13:55599895-55610443   | 17.9738  | 16.0912  | -0.1596 | 0.019579 |
| <i>Cotl1</i>         | chr8:119809224-119840579  | 294.5121 | 257.8680 | -0.1917 | 0.088355 |
| <i>Abhd6</i>         | chr14:8002901-8056555     | 1.7656   | 2.6042   | 0.5607  | 0.056238 |
| <i>Ccdc91</i>        | chr6:147475870-147632612  | 9.9479   | 8.6304   | -0.2050 | 0.021311 |
| <i>Helz2</i>         | chr2:181227614-181242027  | 26.0082  | 32.4597  | 0.3197  | 0.164016 |
| <i>2810001G20Rik</i> | chr11:64079483-64083259   | 67.2266  | 57.9276  | -0.2148 | 0.096716 |
| <i>Nln</i>           | chr13:104023438-104109614 | 4.4203   | 3.7153   | -0.2507 | 0.043107 |
| <i>lft172</i>        | chr5:31253279-31291114    | 3.0938   | 3.8178   | 0.3034  | 0.054453 |
| <i>2410131K14Rik</i> | chr5:118245226-118266093  | 6.1416   | 5.4457   | -0.1735 | 0.016249 |
| <i>Psph</i>          | chr5:129765557-129787252  | 6.4289   | 5.3056   | -0.2770 | 0.078104 |
| <i>Zdhhc2</i>        | chr8:40423814-40510268    | 2.2944   | 3.1389   | 0.4522  | 0.160710 |
| <i>Prkce</i>         | chr17:86167784-86657919   | 2.3182   | 2.8240   | 0.2847  | 0.044011 |
| <i>Rmi2</i>          | chr16:10835058-10892966   | 2.2886   | 1.7958   | -0.3499 | 0.062430 |
| <i>Mcm4</i>          | chr16:15623896-15637400   | 28.6322  | 32.1602  | 0.1676  | 0.015358 |
| <i>Gm26649</i>       | chr1:64029462-64032927    | 4.6803   | 5.7751   | 0.3033  | 0.046353 |
| <i>Vamp4</i>         | chr1:162570514-162599084  | 8.6475   | 10.5212  | 0.2829  | 0.066785 |
| <i>Sell</i>          | chr1:164062075-164080785  | 530.8043 | 484.7387 | -0.1310 | 0.079091 |
| <i>Tnfaip8l2</i>     | chr3:95139520-95142360    | 138.7353 | 123.0619 | -0.1730 | 0.074881 |
| <i>Efhd2</i>         | chr4:141858141-141874920  | 13.3517  | 16.1026  | 0.2703  | 0.072235 |
| <i>Kcnab2</i>        | chr4:152390741-152477871  | 40.4567  | 37.1013  | -0.1249 | 0.053468 |
| <i>Hipk2</i>         | chr6:38694389-38876165    | 2.1018   | 2.9007   | 0.4648  | 0.178198 |
| <i>Cyfp2</i>         | chr11:46193849-46312859   | 34.2674  | 40.0819  | 0.2261  | 0.098357 |
| <i>Arhgef10</i>      | chr8:14911662-15001085    | 2.1056   | 1.7548   | -0.2629 | 0.071049 |
| <i>Supt3</i>         | chr17:44777151-45119290   | 1.1671   | 1.5501   | 0.4094  | 0.003986 |
| <i>Alkbh5</i>        | chr11:60536380-60558512   | 18.2372  | 16.4420  | -0.1495 | 0.081121 |
| <i>ltgae</i>         | chr11:73090582-73147446   | 0.7111   | 1.1303   | 0.6686  | 0.118080 |
| <i>Ndufa13</i>       | chr8:69894187-69902558    | 81.7441  | 70.0597  | -0.2225 | 0.121276 |
| <i>Cyp4f16</i>       | chr17:32536557-32551798   | 2.0942   | 2.7738   | 0.4055  | 0.038835 |
| <i>Ddx39b</i>        | chr17:35241745-35253707   | 99.6168  | 90.3543  | -0.1408 | 0.080255 |
| <i>Med20</i>         | chr17:47611581-47624418   | 15.1309  | 13.4915  | -0.1655 | 0.079680 |
| <i>Tbc1d8</i>        | chr1:39371498-39478747    | 5.6162   | 6.6516   | 0.2441  | 0.023516 |
| <i>Sh3glb2</i>       | chr2:30344808-30359337    | 24.6178  | 21.9498  | -0.1655 | 0.075429 |
| <i>Acss1</i>         | chr2:150618104-150668500  | 21.4341  | 19.6002  | -0.1290 | 0.038654 |
| <i>Psmd4</i>         | chr3:95032693-95042614    | 57.0789  | 51.1368  | -0.1586 | 0.069904 |
| <i>Ago3</i>          | chr4:126331703-126429556  | 4.4931   | 5.2978   | 0.2377  | 0.095424 |
| <i>Susd3</i>         | chr13:49230689-49248706   | 8.3786   | 6.8153   | -0.2979 | 0.112367 |
| <i>Scarna13</i>      | chr12:105031074-105031349 | 747.8921 | 628.0224 | -0.2520 | 0.119407 |
| <i>Wdr82</i>         | chr9:106170928-106191706  | 76.6045  | 70.0938  | -0.1281 | 0.053619 |
| <i>Polr1c</i>        | chr17:46243919-46248054   | 22.2105  | 19.4722  | -0.1898 | 0.054714 |
| <i>Tsen54</i>        | chr11:115814723-115823094 | 6.4611   | 5.4799   | -0.2376 | 0.011290 |
| <i>Zbtb17</i>        | chr4:141444653-141467930  | 13.5157  | 11.8726  | -0.1870 | 0.082440 |

|               |                           |          |          |         |          |
|---------------|---------------------------|----------|----------|---------|----------|
| Zfp407        | chr18:84128026-84589725   | 6.7392   | 7.9798   | 0.2438  | 0.111126 |
| Synj1         | chr16:90936091-91011308   | 6.3803   | 7.6078   | 0.2539  | 0.100821 |
| Hirip3        | chr7:126861971-126865377  | 3.3711   | 4.2823   | 0.3452  | 0.026611 |
| A230020J21Rik | chr1:191025349-191026186  | 9.8851   | 7.5798   | -0.3831 | 0.072502 |
| Sfi1          | chr11:3131849-3193463     | 22.9275  | 26.7566  | 0.2228  | 0.100308 |
| Irf2bp1       | chr7:19004064-19006761    | 15.6330  | 13.2791  | -0.2354 | 0.107997 |
| Urb1          | chr16:90751526-90810413   | 12.8208  | 11.7160  | -0.1300 | 0.044711 |
| Ahnak         | chr19:8989283-9076919     | 17.6221  | 33.6005  | 0.9311  | 0.079845 |
| Hsd11b1       | chr1:193221629-193264054  | 35.0662  | 31.5625  | -0.1519 | 0.042563 |
| Cuta          | chr17:26937972-26939478   | 51.4460  | 43.5379  | -0.2408 | 0.108583 |
| Glrx          | chr13:75839867-75850151   | 7.4754   | 10.4889  | 0.4886  | 0.187940 |
| Abcb1b        | chr5:8798146-8866314      | 4.2535   | 5.1401   | 0.2732  | 0.036518 |
| Maf           | chr8:115682941-115707794  | 3.7075   | 10.0203  | 1.4344  | 0.150874 |
| Gne           | chr4:44034074-44084177    | 9.8476   | 8.9108   | -0.1442 | 0.034044 |
| Idh3b         | chr2:130279308-130284547  | 46.2845  | 41.8146  | -0.1465 | 0.068757 |
| Pvr           | chr7:19903577-19921160    | 11.3307  | 10.1871  | -0.1535 | 0.042509 |
| Kmt2a         | chr9:44803354-44881296    | 11.6866  | 16.7495  | 0.5193  | 0.114243 |
| Tox4          | chr14:52279145-52296391   | 27.0075  | 24.7555  | -0.1256 | 0.037245 |
| Pcbp1         | chr6:86524498-86526171    | 14.3658  | 18.1120  | 0.3343  | 0.117345 |
| Gm26586       | chr8:72137388-72140820    | 21.2561  | 18.7263  | -0.1828 | 0.046964 |
| Padi2         | chr4:140906343-140952586  | 7.5028   | 5.9805   | -0.3272 | 0.143925 |
| Jkamp         | chr12:72085588-72101461   | 10.2236  | 8.7678   | -0.2216 | 0.055244 |
| Ggps1         | chr13:14052448-14063401   | 42.8392  | 37.9418  | -0.1751 | 0.072783 |
| Urm1          | chr2:29820074-29845002    | 8.3254   | 7.2609   | -0.1974 | 0.034628 |
| Wasf2         | chr4:133130504-133199756  | 15.3039  | 18.2817  | 0.2565  | 0.115549 |
| Clic4         | chr4:135213968-135272814  | 5.3882   | 6.2802   | 0.2210  | 0.024609 |
| Hspa4         | chr11:53259813-53300457   | 53.4476  | 48.1384  | -0.1509 | 0.079779 |
| G530012D18Rik | chr1:85575675-85577295    | 35.1202  | 44.0629  | 0.3273  | 0.060433 |
| Noc2l         | chr4:156236009-156247616  | 51.6347  | 47.3145  | -0.1261 | 0.040807 |
| Dapk1         | chr13:60601946-60763185   | 4.7439   | 3.9025   | -0.2817 | 0.143062 |
| Cd4           | chr6:124864691-124888221  | 240.3847 | 224.8165 | -0.0966 | 0.044133 |
| Eij4enif1     | chr11:3202391-3244588     | 9.0575   | 10.3057  | 0.1863  | 0.025906 |
| Kremen1       | chr11:5191551-5261558     | 11.9300  | 10.8061  | -0.1427 | 0.075455 |
| Ung           | chr5:114130385-114139323  | 4.8971   | 4.0370   | -0.2786 | 0.024137 |
| Rnf185        | chr11:3415981-3452363     | 11.9963  | 10.5715  | -0.1824 | 0.046639 |
| Wipf2         | chr11:98863637-98905040   | 3.1567   | 3.8419   | 0.2834  | 0.087998 |
| Slc2a3        | chr6:122727808-122801640  | 8.3350   | 7.2467   | -0.2018 | 0.084611 |
| Flt3l         | chr7:45131187-45136432    | 45.4164  | 40.7969  | -0.1548 | 0.071052 |
| Ears2         | chr7:122037212-122067263  | 8.5776   | 7.3617   | -0.2205 | 0.101165 |
| Ccr5          | chr9:124121542-124147699  | 0.8723   | 2.7787   | 1.6715  | 0.215473 |
| Arhgap31      | chr16:38598339-38713274   | 5.4262   | 6.8511   | 0.3364  | 0.139170 |
| NA            | chr1:151344368-151344736  | 29.0505  | 23.3954  | -0.3123 | 0.035491 |
| Tcerg1        | chr18:42511509-42575551   | 19.5782  | 22.1868  | 0.1805  | 0.036793 |
| Arnt          | chr3:95434387-95497240    | 8.3519   | 9.5244   | 0.1895  | 0.033679 |
| Slc36a4       | chr9:15709737-15742384    | 1.4051   | 2.0825   | 0.5676  | 0.160553 |
| Ncoa7         | chr10:30645583-30803107   | 11.2683  | 12.8293  | 0.1872  | 0.021068 |
| Naaa          | chr5:92257658-92278170    | 3.0860   | 2.4816   | -0.3144 | 0.066432 |
| Pole4         | chr6:82618991-82705365    | 19.3211  | 16.6521  | -0.2145 | 0.085099 |
| Gm4673        | chr7:30957408-30961619    | 4.6845   | 5.7207   | 0.2883  | 0.063980 |
| Lamp1         | chr8:13159134-13175338    | 76.4541  | 69.0274  | -0.1474 | 0.074972 |
| Prr13         | chr15:102459027-102462806 | 17.7915  | 22.1322  | 0.3150  | 0.110156 |
| Thap7         | chr16:17527981-17531136   | 22.8287  | 20.2047  | -0.1762 | 0.036443 |
| Dnajb5        | chr4:42949813-42959425    | 2.5477   | 3.1147   | 0.2899  | 0.027155 |
| Ccdc28b       | chr4:129619273-129623947  | 5.6671   | 7.7814   | 0.4574  | 0.147543 |
| Tpm4          | chr8:72134974-72153142    | 112.4412 | 98.4971  | -0.1910 | 0.109178 |
| Dld           | chr12:31331563-31351437   | 23.7947  | 26.9327  | 0.1787  | 0.003051 |
| Gfi1          | chr5:107716656-107726036  | 5.2732   | 6.3672   | 0.2720  | 0.023623 |
| Zfp14         | chr7:30038052-30044734    | 7.3429   | 5.9823   | -0.2957 | 0.037903 |
| Ocrl          | chrX:47912386-47965868    | 1.5029   | 1.8242   | 0.2795  | 0.029466 |
| Apobec3       | chr15:79891658-79915906   | 18.7743  | 22.1812  | 0.2406  | 0.098672 |
| Bach2os       | chr4:32559679-32571708    | 4.4432   | 6.4307   | 0.5334  | 0.212578 |
| Ippk          | chr13:49421310-49462990   | 15.2268  | 13.4689  | -0.1770 | 0.049694 |
| Tmem115       | chr9:107533944-107538656  | 21.5837  | 19.1977  | -0.1690 | 0.066792 |
| Stxbp5        | chr10:9755546-9901079     | 6.3460   | 7.2171   | 0.1856  | 0.040118 |
| Max           | chr12:76937268-76962248   | 51.8652  | 47.2258  | -0.1352 | 0.037647 |
| Eftud1        | chr7:82648613-82777852    | 9.8495   | 11.1639  | 0.1807  | 0.000998 |
| Atp13a1       | chr8:69791162-69807749    | 46.5514  | 42.2929  | -0.1384 | 0.097620 |
| Rabgga        | chr14:55715872-55722257   | 24.5562  | 22.0270  | -0.1568 | 0.075792 |
| Pram1         | chr17:33638055-33645706   | 1.5952   | 2.2296   | 0.4831  | 0.050982 |
| Mrpl2         | chr17:46646228-46650139   | 23.8129  | 20.4374  | -0.2205 | 0.067889 |
| Exosc8        | chr3:54728677-54735393    | 18.8366  | 21.5878  | 0.1967  | 0.035437 |

|                      |                           |          |          |         |          |
|----------------------|---------------------------|----------|----------|---------|----------|
| <i>Ptger2</i>        | chr14:44988194-45003820   | 2.6700   | 3.9890   | 0.5792  | 0.191054 |
| <i>Mthfd1l</i>       | chr10:3973117-4167081     | 19.1412  | 17.3844  | -0.1389 | 0.038058 |
| <i>Hnrnpf</i>        | chr6:117900323-117925622  | 29.4244  | 26.1996  | -0.1675 | 0.081296 |
| <i>Ranbp3</i>        | chr17:56673224-56711769   | 52.6555  | 48.0978  | -0.1306 | 0.046417 |
| <i>Zbtb37</i>        | chr1:161008793-161034849  | 13.2182  | 15.3400  | 0.2148  | 0.057421 |
| <i>Usp12</i>         | chr5:146734808-146795006  | 16.2075  | 18.9516  | 0.2257  | 0.042338 |
| <i>Bzw2</i>          | chr12:36091845-36156825   | 107.7806 | 93.0028  | -0.2128 | 0.118748 |
| <i>Tbc1d10b</i>      | chr7:127197464-127208468  | 21.5549  | 19.6173  | -0.1359 | 0.066986 |
| <i>Prkacb</i>        | chr3:146729578-146812960  | 71.2297  | 64.9804  | -0.1325 | 0.052873 |
| <i>Ddx55</i>         | chr5:124552863-124569660  | 9.1536   | 8.3081   | -0.1398 | 0.004117 |
| <i>Jrkl</i>          | chr9:13242789-13245741    | 8.2685   | 9.8233   | 0.2486  | 0.033150 |
| <i>Pfkfb2</i>        | chr1:130689042-130729253  | 7.6452   | 6.8980   | -0.1484 | 0.045397 |
| <i>Sptan1</i>        | chr2:29965559-30031451    | 91.0573  | 84.0464  | -0.1156 | 0.074439 |
| <i>Ppp2r3c</i>       | chr12:55280813-55303000   | 7.0936   | 8.5781   | 0.2741  | 0.031686 |
| <i>Brp</i>           | chr5:121660562-121687248  | 26.2343  | 23.8132  | -0.1397 | 0.049419 |
| <i>Tank</i>          | chr2:61578584-61654171    | 19.2507  | 22.4224  | 0.2200  | 0.078073 |
| <i>Peli1</i>         | chr11:21091290-21150323   | 49.2460  | 54.6205  | 0.1494  | 0.023737 |
| <i>B3gnt2</i>        | chr11:22834746-22860961   | 38.1129  | 43.2036  | 0.1809  | 0.041619 |
| <i>Lrrn3</i>         | chr12:41451672-41485751   | 1.1127   | 1.6935   | 0.6059  | 0.092860 |
| <i>Dnaaf2</i>        | chr12:69189086-69198429   | 10.2781  | 8.9495   | -0.1997 | 0.056989 |
| <i>Zbtb1</i>         | chr12:76370265-76396950   | 10.0505  | 11.4641  | 0.1899  | 0.059310 |
| <i>Aup1</i>          | chr6:83054652-83057680    | 87.9436  | 79.7267  | -0.1415 | 0.065929 |
| <i>Rp9</i>           | chr9:22448310-22468356    | 72.1172  | 63.8070  | -0.1766 | 0.071961 |
| <i>Cyp2d22</i>       | chr15:82370527-82380260   | 5.0108   | 4.1251   | -0.2806 | 0.063358 |
| <i>C430014B12Rik</i> | chr1:82691927-82725117    | 7.2444   | 5.4139   | -0.4202 | 0.085315 |
| <i>Gm11973</i>       | chr11:6475424-6493535     | 9.6733   | 7.7088   | -0.3275 | 0.044511 |
| <i>Hsd17b7</i>       | chr1:169949534-169969241  | 3.4040   | 2.8028   | -0.2804 | 0.078966 |
| <i>Usp39</i>         | chr6:72318677-72345184    | 26.6679  | 23.6424  | -0.1737 | 0.057437 |
| <i>Eif4g1</i>        | chr16:20668312-20692884   | 74.5757  | 68.5714  | -0.1211 | 0.080354 |
| <i>Rabep2</i>        | chr7:126428758-126449245  | 10.9147  | 9.7008   | -0.1701 | 0.102846 |
| <i>Oxct1</i>         | chr15:4026382-4155344     | 48.8574  | 43.5399  | -0.1662 | 0.079649 |
| <i>Gfod1</i>         | chr13:43195518-43304172   | 2.0250   | 2.6208   | 0.3721  | 0.102768 |
| <i>Gm20507</i>       | chr17:33630758-33645705   | 3.6853   | 4.5713   | 0.3108  | 0.030887 |
| <i>Fgd6</i>          | chr10:94036000-94145339   | 0.7169   | 0.9702   | 0.4364  | 0.084757 |
| <i>Sulf2</i>         | chr2:166073088-166155663  | 0.6878   | 0.9892   | 0.5243  | 0.061372 |
| <i>Cog6</i>          | chr3:52982122-53017223    | 16.9669  | 15.1764  | -0.1609 | 0.032884 |
| <i>Vps54</i>         | chr11:21239280-21321136   | 23.6350  | 28.0515  | 0.2472  | 0.118289 |
| <i>Aes</i>           | chr10:81559493-81566362   | 330.8525 | 286.1136 | -0.2096 | 0.151342 |
| <i>Nme4</i>          | chr17:26091733-26095508   | 7.2445   | 5.8490   | -0.3087 | 0.031756 |
| <i>Tbc1d10c</i>      | chr19:4184357-4191047     | 254.1778 | 237.2112 | -0.0997 | 0.053707 |
| <i>Gm16158</i>       | chr7:68338667-68353201    | 7.8706   | 10.8213  | 0.4593  | 0.074460 |
| <i>9330154K18Rik</i> | chr15:57717803-57738666   | 1.6640   | 2.2797   | 0.4542  | 0.119959 |
| <i>Trpc4ap</i>       | chr2:155634270-155692384  | 25.3667  | 23.4294  | -0.1146 | 0.063168 |
| <i>Gm22133</i>       | chr7:45458088-45458197    | 561.0688 | 453.6720 | -0.3065 | 0.146439 |
| <i>Trmu</i>          | chr15:85879311-85897394   | 8.8753   | 7.6854   | -0.2077 | 0.080338 |
| <i>Pptc7</i>         | chr5:122284364-122324281  | 29.8055  | 27.1993  | -0.1320 | 0.073681 |
| <i>Acot8</i>         | chr2:164792767-164804882  | 13.0310  | 11.5483  | -0.1743 | 0.000790 |
| <i>Pfkfb3</i>        | chr2:11471429-11502101    | 6.3164   | 7.1773   | 0.1843  | 0.006970 |
| <i>Cep290</i>        | chr10:100488288-100573655 | 0.9297   | 1.2914   | 0.4741  | 0.140342 |
| <i>Slc11a2</i>       | chr15:100387897-100425072 | 7.0214   | 6.3152   | -0.1529 | 0.020078 |
| <i>Tor4a</i>         | chr2:25192965-25196886    | 43.7137  | 39.7169  | -0.1383 | 0.106233 |
| <i>Trmt44</i>        | chr5:35557205-35575070    | 5.5818   | 4.6785   | -0.2547 | 0.119665 |
| <i>Dhx16</i>         | chr17:35879818-35892670   | 38.5672  | 34.5639  | -0.1581 | 0.104909 |
| <i>Rtp4</i>          | chr16:23609918-23614222   | 27.7699  | 36.4398  | 0.3920  | 0.161623 |
| <i>Gm9806</i>        | chr19:16780546-16781103   | 15.4232  | 12.5577  | -0.2965 | 0.004166 |
| <i>Phf11c</i>        | chr14:59380832-59395381   | 14.5633  | 17.4605  | 0.2617  | 0.093151 |
| <i>Acadvl</i>        | chr11:70010182-70015411   | 41.3009  | 37.8858  | -0.1245 | 0.044233 |
| <i>Ddx21</i>         | chr10:62580247-62602298   | 58.9868  | 66.9257  | 0.1822  | 0.042492 |
| <i>Cops6</i>         | chr5:138161070-138164646  | 12.6507  | 14.8347  | 0.2298  | 0.031654 |
| <i>Tmem8</i>         | chr17:26113315-26123254   | 9.0829   | 7.9894   | -0.1851 | 0.060521 |
| <i>Zfp318</i>        | chr17:46383730-46420920   | 6.6025   | 7.7777   | 0.2363  | 0.079236 |
| <i>Pyhin1</i>        | chr1:173630858-173647928  | 106.0778 | 120.3801 | 0.1825  | 0.058779 |
| <i>Slc25a53</i>      | chrX:136981115-137038302  | 0.8855   | 1.1711   | 0.4033  | 0.063634 |
| <i>Cpsf3l</i>        | chr4:155869545-155889103  | 28.3601  | 25.9493  | -0.1282 | 0.020146 |
| <i>Med13l</i>        | chr5:118560718-118765435  | 20.1568  | 23.4782  | 0.2201  | 0.109563 |
| <i>Fuk</i>           | chr8:110882462-110902459  | 6.3519   | 5.4376   | -0.2242 | 0.070118 |
| <i>Tor3a</i>         | chr1:156653616-156674356  | 5.1427   | 6.3618   | 0.3069  | 0.085428 |
| <i>Pdf</i>           | chr8:107044697-107048614  | 23.4462  | 21.1507  | -0.1487 | 0.005427 |
| <i>Plcx1</i>         | chr5:110099968-110105953  | 9.5812   | 8.1973   | -0.2250 | 0.118535 |
| <i>Neurl3</i>        | chr1:36264601-36273425    | 29.1881  | 34.8400  | 0.2554  | 0.077408 |
| <i>B930094E09Rik</i> | chr18:31609511-31610751   | 5.1939   | 4.0053   | -0.3749 | 0.046185 |

|                      |                           |          |          |         |          |
|----------------------|---------------------------|----------|----------|---------|----------|
| <i>Eif4a3</i>        | chr11:119288362-119300089 | 48.3440  | 43.3404  | -0.1576 | 0.059586 |
| <i>Wdr4</i>          | chr17:31494322-31519974   | 6.7369   | 5.9563   | -0.1777 | 0.052538 |
| <i>Arl5b</i>         | chr2:15049394-15082456    | 10.2712  | 9.4166   | -0.1253 | 0.017294 |
| <i>Gm26835</i>       | chr10:13967023-14007405   | 4.5665   | 6.2016   | 0.4415  | 0.170688 |
| <i>Tbc1d32</i>       | chr10:56014297-56228689   | 0.9503   | 1.2268   | 0.3684  | 0.044833 |
| <i>Psap</i>          | chr10:60277626-60302597   | 157.6071 | 148.7478 | -0.0835 | 0.029459 |
| <i>Gm11707</i>       | chr11:106972057-106973090 | 19.6515  | 15.6465  | -0.3288 | 0.068958 |
| <i>Gatad1</i>        | chr5:3632931-3647934      | 15.3604  | 13.5158  | -0.1846 | 0.078449 |
| <i>Bhlhe40</i>       | chr6:108660628-108666925  | 1.5734   | 4.2045   | 1.4181  | 0.125009 |
| <i>Zfp773</i>        | chr7:7130677-7136755      | 3.3767   | 2.7772   | -0.2820 | 0.014798 |
| <i>Stim1</i>         | chr7:102267823-102436848  | 40.0288  | 36.3074  | -0.1408 | 0.108945 |
| <i>A230103J11Rik</i> | chr8:85053159-85060460    | 8.9651   | 7.6902   | -0.2213 | 0.036997 |
| <i>Gm15655</i>       | chr8:115705077-115707233  | 6.8553   | 17.6140  | 1.3614  | 0.169551 |
| <i>Txn2</i>          | chr15:77915046-77929006   | 11.1891  | 14.1599  | 0.3397  | 0.104538 |
| <i>Gtpbp1</i>        | chr15:79690894-79721478   | 63.4897  | 58.9685  | -0.1066 | 0.045750 |
| <i>Prkcd</i>         | chr14:30595355-30626210   | 12.2601  | 13.9756  | 0.1889  | 0.025179 |
| <i>Aars2</i>         | chr17:45506840-45520842   | 8.1240   | 7.0219   | -0.2103 | 0.071530 |
| <i>Mbd5</i>          | chr2:48949509-49322284    | 2.4851   | 2.9105   | 0.2280  | 0.063768 |
| <i>Cwc22</i>         | chr2:77881158-77946375    | 8.0077   | 9.1422   | 0.1912  | 0.022849 |
| <i>Abtb2</i>         | chr2:103566309-103718423  | 36.1246  | 32.3459  | -0.1594 | 0.124184 |
| <i>Fam98b</i>        | chr2:117249738-117271540  | 1.9280   | 2.5265   | 0.3900  | 0.028448 |
| <i>Psmc3</i>         | chr2:91054008-91066369    | 59.3959  | 52.3808  | -0.1813 | 0.093082 |
| <i>Xaf1</i>          | chr11:72301628-72313733   | 8.9484   | 11.4902  | 0.3607  | 0.141471 |
| <i>Rnf32</i>         | chr5:29195991-29225524    | 2.3472   | 1.7716   | -0.4059 | 0.055648 |
| <i>Uvssa</i>         | chr5:33378550-33419754    | 9.7472   | 11.3392  | 0.2183  | 0.087351 |
| <i>Tmem221</i>       | chr8:71554302-71558871    | 4.4472   | 3.4869   | -0.3509 | 0.037190 |
| <i>Satb1</i>         | chr17:51736186-51833290   | 79.0850  | 91.0019  | 0.2025  | 0.075058 |
| <i>Cep104</i>        | chr4:153975193-154008732  | 3.5456   | 4.3233   | 0.2861  | 0.084450 |
| <i>Znrf1</i>         | chr8:111536096-111626030  | 36.8024  | 33.6842  | -0.1277 | 0.108442 |
| <i>Shc4</i>          | chr2:125627446-125724148  | 1.4400   | 1.2106   | -0.2503 | 0.002507 |
| <i>Fam175a</i>       | chr5:100805191-100820965  | 10.1024  | 11.7320  | 0.2157  | 0.020506 |
| <i>Bckdha</i>        | chr7:25629851-25658761    | 21.6515  | 18.5757  | -0.2211 | 0.110453 |
| <i>Adrbk1</i>        | chr19:4286000-4306222     | 119.2810 | 111.1731 | -0.1016 | 0.059576 |
| <i>A730015C16Rik</i> | chr4:108847398-108848619  | 10.8942  | 9.0195   | -0.2724 | 0.058909 |
| <i>Ilvbl</i>         | chr10:78574499-78584498   | 19.7641  | 17.8264  | -0.1489 | 0.028934 |
| <i>Irf2bpl</i>       | chr12:86880702-86884814   | 22.7281  | 20.0391  | -0.1817 | 0.119878 |
| <i>Mapkapk5</i>      | chr5:121518612-121545905  | 12.9407  | 11.9052  | -0.1203 | 0.007855 |
| <i>Apol10b</i>       | chr15:77584157-77596125   | 2.4757   | 1.6120   | -0.6190 | 0.097611 |
| <i>Dcbld2</i>        | chr16:58408442-58469727   | 0.5867   | 0.8005   | 0.4483  | 0.081224 |
| <i>Prmt2</i>         | chr10:76207221-76237865   | 5.0634   | 4.2576   | -0.2501 | 0.052048 |
| <i>Ptcd1</i>         | chr5:145147513-145167108  | 16.6581  | 15.0099  | -0.1503 | 0.026035 |
| <i>Gata1</i>         | chrX:7959259-7978071      | 5.3721   | 4.4433   | -0.2739 | 0.050383 |
| <i>Zadh2</i>         | chr18:84088157-84097514   | 5.3810   | 6.6100   | 0.2968  | 0.082438 |
| <i>Marcks1</i>       | chr4:129513580-129515985  | 4.5556   | 6.0998   | 0.4211  | 0.111098 |
| <i>Exosc5</i>        | chr7:25659152-25668031    | 30.6175  | 26.3710  | -0.2154 | 0.075380 |
| <i>Tes</i>           | chr6:17065148-17105828    | 79.6289  | 71.9003  | -0.1473 | 0.074305 |
| <i>Trbv31</i>        | chr6:41557690-41558371    | 116.3191 | 99.7101  | -0.2223 | 0.117426 |
| <i>Ift80</i>         | chr3:68892498-69004570    | 32.8700  | 36.2311  | 0.1405  | 0.013482 |
| <i>Pcnx</i>          | chr12:81860029-82000924   | 6.0407   | 6.9862   | 0.2098  | 0.071209 |
| <i>Glyr1</i>         | chr16:5013905-5049910     | 62.8685  | 58.2050  | -0.1112 | 0.048261 |
| <i>Shhg1</i>         | chr19:8723495-8726442     | 36.7551  | 43.0232  | 0.2272  | 0.083723 |
| <i>Prrc2b</i>        | chr2:32151081-32234537    | 18.8873  | 23.3881  | 0.3084  | 0.203315 |
| <i>Ddx27</i>         | chr2:167015192-167034947  | 25.0637  | 23.3774  | -0.1005 | 0.001434 |
| <i>Yae1d1</i>        | chr13:17986639-17993351   | 4.0220   | 3.3546   | -0.2618 | 0.030717 |
| <i>Limd1</i>         | chr9:123478700-123521548  | 31.8484  | 29.4720  | -0.1119 | 0.043228 |
| <i>Ak6</i>           | chr13:100651342-100666413 | 18.5476  | 15.3691  | -0.2712 | 0.082816 |
| <i>Fam210a</i>       | chr18:68260186-68300333   | 7.0094   | 8.0413   | 0.1981  | 0.048209 |
| <i>Gm26564</i>       | chr10:34295911-34298907   | 14.4693  | 12.8438  | -0.1719 | 0.058007 |
| <i>Rmnd5b</i>        | chr11:51623670-51635896   | 32.2428  | 29.4491  | -0.1308 | 0.022337 |
| <i>Tmem140</i>       | chr6:34863145-34874946    | 3.9746   | 4.6914   | 0.2392  | 0.038860 |
| <i>Txndc16</i>       | chr14:45134447-45220328   | 4.9993   | 4.4816   | -0.1577 | 0.041714 |
| <i>Aamp</i>          | chr1:74279839-74284738    | 68.4936  | 62.2043  | -0.1390 | 0.069994 |
| <i>Mdfic</i>         | chr6:15720660-15802165    | 1.5322   | 2.6248   | 0.7766  | 0.079673 |
| <i>Fancg</i>         | chr4:43002342-43010506    | 4.8369   | 4.0840   | -0.2441 | 0.068679 |
| <i>Taf6</i>          | chr5:138178616-138187451  | 15.9649  | 14.5350  | -0.1354 | 0.015220 |
| <i>Pim3</i>          | chr15:88862185-88865718   | 10.9084  | 9.3926   | -0.2158 | 0.091343 |
| <i>Nrd1</i>          | chr4:109000654-109061777  | 20.5108  | 23.0849  | 0.1706  | 0.038532 |
| <i>F2rl3</i>         | chr8:72761879-72763874    | 5.8972   | 4.7578   | -0.3097 | 0.057930 |
| <i>Zkscan3</i>       | chr13:21387012-21402755   | 15.8686  | 14.4597  | -0.1341 | 0.083006 |
| <i>Il21r</i>         | chr7:125603428-125633570  | 84.6322  | 76.3182  | -0.1492 | 0.116617 |
| <i>Mbd6</i>          | chr10:127281955-127289018 | 2.8436   | 3.7428   | 0.3964  | 0.121547 |

|                      |                           |          |          |         |          |
|----------------------|---------------------------|----------|----------|---------|----------|
| <i>Sytl1</i>         | chr4:133253089-133263113  | 9.2101   | 7.7319   | -0.2524 | 0.118063 |
| <i>Tmem184b</i>      | chr15:79360683-79403303   | 4.7381   | 6.0088   | 0.3427  | 0.135417 |
| <i>Gm8369</i>        | chr19:11492037-11512577   | 10.9118  | 14.2617  | 0.3863  | 0.115577 |
| <i>Pum2</i>          | chr12:8674133-8752581     | 45.7238  | 51.3002  | 0.1660  | 0.054984 |
| <i>Calm3</i>         | chr7:16915378-16924114    | 98.2571  | 86.0497  | -0.1914 | 0.118289 |
| <i>Gm20503</i>       | chr4:59003209-59041888    | 30.8193  | 25.5320  | -0.2715 | 0.121254 |
| <i>Ttn</i>           | chr2:76703979-76982547    | 0.6148   | 1.6817   | 1.4517  | 0.149883 |
| <i>Snx20</i>         | chr8:88626827-88636128    | 33.7749  | 30.0398  | -0.1691 | 0.088186 |
| <i>Tymp</i>          | chr15:89371930-89377039   | 9.8770   | 8.5370   | -0.2103 | 0.042665 |
| <i>Chrna2</i>        | chr14:66140959-66152948   | 1.0005   | 1.4757   | 0.5608  | 0.068844 |
| <i>Nup160</i>        | chr2:90677214-90736328    | 7.5518   | 8.5578   | 0.1804  | 0.028767 |
| <i>Stau1</i>         | chr2:166947548-166996299  | 10.6523  | 12.4154  | 0.2210  | 0.079201 |
| <i>Tmem261</i>       | chr4:75277353-75278305    | 39.4222  | 33.8059  | -0.2217 | 0.077506 |
| <i>Eps15</i>         | chr4:109280267-109387817  | 18.0965  | 20.2843  | 0.1647  | 0.025783 |
| <i>Map3k5</i>        | chr10:19934471-20142753   | 16.8303  | 19.9249  | 0.2435  | 0.132399 |
| <i>Rnf138</i>        | chr18:21001340-21028223   | 15.9586  | 18.7875  | 0.2354  | 0.077015 |
| <i>Rsrp1</i>         | chr4:134923591-134927671  | 269.0534 | 244.6470 | -0.1372 | 0.108713 |
| <i>Sumf1</i>         | chr6:108107027-108185582  | 8.2615   | 7.3159   | -0.1754 | 0.014449 |
| <i>Wdr1</i>          | chr5:38526813-38561666    | 249.4174 | 228.3007 | -0.1276 | 0.071673 |
| <i>Zfp1</i>          | chr19:6076486-6084944     | 13.4031  | 11.7852  | -0.1856 | 0.072387 |
| <i>Hnrnp1</i>        | chr11:50376989-50386528   | 90.6669  | 100.5241 | 0.1489  | 0.025873 |
| <i>Yy1</i>           | chr12:108792972-108816632 | 48.5507  | 45.3112  | -0.0996 | 0.010276 |
| <i>Gzmk</i>          | chr13:113171607-113225908 | 1.7447   | 4.2093   | 1.2706  | 0.222162 |
| <i>Baiap3</i>        | chr17:25242658-25256364   | 3.1473   | 4.0206   | 0.3533  | 0.155012 |
| <i>Scrn2</i>         | chr11:97029937-97033958   | 4.3917   | 3.5737   | -0.2974 | 0.020736 |
| <i>Herc3</i>         | chr6:58831464-58920398    | 35.1857  | 32.8026  | -0.1012 | 0.030860 |
| <i>Slc25a4</i>       | chr8:46206796-46211284    | 41.4092  | 36.7943  | -0.1705 | 0.098678 |
| <i>Pqbp1</i>         | chrX:7894518-7899269      | 51.2991  | 44.1348  | -0.2170 | 0.109096 |
| <i>Pex6</i>          | chr17:46711462-46725541   | 12.6979  | 11.1365  | -0.1893 | 0.096606 |
| <i>Mrpl24</i>        | chr3:87919505-87923672    | 79.5292  | 73.5448  | -0.1129 | 0.029624 |
| <i>A1314180</i>      | chr4:58798910-58912749    | 10.6279  | 11.8696  | 0.1594  | 0.025654 |
| <i>Snord14e</i>      | chr9:40804747-40804837    | 90.2952  | 66.1005  | -0.4500 | 0.179881 |
| <i>Ssbp3</i>         | chr4:106910700-107049694  | 13.7046  | 12.5043  | -0.1322 | 0.058774 |
| <i>Rrbp1</i>         | chr2:143947394-144011263  | 7.1974   | 8.4328   | 0.2285  | 0.100955 |
| <i>Pld3</i>          | chr7:27531999-27553218    | 32.2520  | 29.5516  | -0.1262 | 0.057549 |
| <i>Cpox</i>          | chr16:58670207-58680391   | 5.2028   | 4.4404   | -0.2286 | 0.044135 |
| <i>Trrap</i>         | chr5:144768091-144859778  | 13.5613  | 16.2902  | 0.2645  | 0.164162 |
| <i>Sept9</i>         | chr11:117199660-117362325 | 57.1470  | 53.5727  | -0.0932 | 0.017289 |
| <i>Rnf121</i>        | chr7:102019136-102065469  | 5.3428   | 6.2980   | 0.2373  | 0.040985 |
| <i>Crls1</i>         | chr2:132846665-132866785  | 9.5882   | 7.9110   | -0.2774 | 0.087071 |
| <i>Puf60</i>         | chr15:76070183-76080946   | 102.3017 | 93.2910  | -0.1330 | 0.063865 |
| <i>Ezr</i>           | chr17:6738040-6782784     | 194.2490 | 179.5690 | -0.1134 | 0.089420 |
| <i>Srm</i>           | chr4:148591502-148594993  | 13.5979  | 11.6289  | -0.2257 | 0.060454 |
| <i>Rps14</i>         | chr18:60774509-60778546   | 454.2743 | 372.0734 | -0.2880 | 0.178274 |
| <i>1810034E14Rik</i> | chr13:64248745-64268145   | 7.2937   | 6.0034   | -0.2809 | 0.052240 |
| <i>Lamc1</i>         | chr1:153218921-153332786  | 0.3743   | 0.6622   | 0.8230  | 0.159823 |
| <i>Frs2</i>          | chr10:117070128-117148474 | 5.1780   | 6.2866   | 0.2799  | 0.134866 |
| <i>Zfp553</i>        | chr7:127233060-127238179  | 16.4193  | 14.7885  | -0.1509 | 0.079196 |
| <i>Lpar5</i>         | chr6:125067919-125082472  | 5.2072   | 4.1656   | -0.3220 | 0.040457 |
| <i>Dennd4a</i>       | chr9:64811339-64919667    | 5.8438   | 6.9944   | 0.2593  | 0.083757 |
| <i>Mapkapk3</i>      | chr9:107254926-107289877  | 18.3123  | 16.8633  | -0.1189 | 0.066868 |
| <i>Fbxo34</i>        | chr14:47472560-47531962   | 3.9525   | 4.8444   | 0.2935  | 0.050049 |
| <i>Zgpat</i>         | chr2:181364927-181383628  | 72.6389  | 65.8308  | -0.1420 | 0.111758 |
| <i>Chtop</i>         | chr3:90498955-90509498    | 73.3405  | 68.4785  | -0.0990 | 0.018606 |
| <i>Ppp1r7</i>        | chr1:93342853-93373489    | 4.5043   | 5.1611   | 0.1964  | 0.023765 |
| <i>Gm20662</i>       | chr9:107996348-108045270  | 43.5552  | 38.9773  | -0.1602 | 0.136638 |
| <i>Wbp11</i>         | chr6:136813653-136828233  | 11.8927  | 14.0847  | 0.2440  | 0.092966 |
| <i>Klf13</i>         | chr7:63886350-63938915    | 47.6042  | 56.0165  | 0.2348  | 0.139628 |
| <i>St6gal1</i>       | chr16:23224739-23360350   | 70.9187  | 66.5551  | -0.0916 | 0.054098 |
| <i>Abi3</i>          | chr11:95830073-95842476   | 10.4234  | 9.4182   | -0.1463 | 0.031084 |
| <i>NA</i>            | chr9:88438597-88441187    | 1.8020   | 2.4733   | 0.4568  | 0.069097 |
| <i>Cerkl</i>         | chr2:79330542-79456785    | 7.1412   | 8.4926   | 0.2500  | 0.114820 |
| <i>Col10a1</i>       | chr10:34389980-34397085   | 1.9908   | 2.7579   | 0.4702  | 0.146435 |
| <i>Pglyrp2</i>       | chr17:32413099-32424167   | 65.3592  | 58.3817  | -0.1629 | 0.112984 |
| <i>Man1a2</i>        | chr3:100562207-100685503  | 26.6025  | 24.7493  | -0.1042 | 0.037592 |
| <i>Gng10</i>         | chr4:59035087-59041903    | 30.2389  | 25.1104  | -0.2681 | 0.124427 |
| <i>Cltc</i>          | chr11:86694350-86757565   | 41.0197  | 46.0046  | 0.1655  | 0.062223 |
| <i>F2rl2</i>         | chr13:95696852-95702739   | 1.3179   | 2.0007   | 0.6022  | 0.148480 |
| <i>Gltscr2</i>       | chr7:15937837-15946108    | 211.9711 | 191.2972 | -0.1481 | 0.103250 |
| <i>Csnk1g1</i>       | chr9:65908973-66045009    | 6.5262   | 7.6492   | 0.2291  | 0.099157 |
| <i>Nprl2</i>         | chr9:107542208-107545704  | 29.8702  | 26.4290  | -0.1766 | 0.050867 |

|                      |                           |          |          |         |          |
|----------------------|---------------------------|----------|----------|---------|----------|
| <i>Tab3</i>          | chrX:85574021-85634469    | 3.2536   | 3.8074   | 0.2268  | 0.018340 |
| <i>Chka</i>          | chr19:3851772-3894369     | 1.1937   | 1.4341   | 0.2648  | 0.028273 |
| <i>Slc18a2</i>       | chr19:59260877-59296012   | 2.4258   | 3.0150   | 0.3137  | 0.024564 |
| <i>Cenpl</i>         | chr1:161070766-161086724  | 1.0811   | 1.3963   | 0.3692  | 0.013927 |
| <i>Arhgap30</i>      | chr1:171388953-171410298  | 130.2444 | 120.6050 | -0.1109 | 0.077736 |
| <i>Mkks</i>          | chr2:136873779-136891389  | 9.0211   | 7.7416   | -0.2207 | 0.100049 |
| <i>Abhd12</i>        | chr2:150832492-150904741  | 20.4166  | 18.5317  | -0.1397 | 0.063477 |
| <i>Cyb5rl</i>        | chr4:107066987-107088268  | 2.8046   | 2.4262   | -0.2091 | 0.046766 |
| <i>Sorcs2</i>        | chr5:36017179-36398139    | 3.2549   | 2.7157   | -0.2613 | 0.150461 |
| <i>Hist1h2bc</i>     | chr13:23684198-23692488   | 22.6522  | 17.4765  | -0.3742 | 0.117859 |
| <i>Als2cl</i>        | chr9:110879869-110900530  | 139.4029 | 123.9220 | -0.1698 | 0.148653 |
| <i>H1fo</i>          | chr15:79028211-79030498   | 8.9761   | 12.2230  | 0.4454  | 0.198697 |
| <i>Zfp523</i>        | chr17:28177206-28205886   | 2.0707   | 2.7006   | 0.3832  | 0.099840 |
| <i>NA</i>            | chr1:119526424-119528224  | 21.0895  | 18.8713  | -0.1603 | 0.028367 |
| <i>Ubxn11</i>        | chr4:134102569-134127593  | 30.3177  | 27.4177  | -0.1451 | 0.112420 |
| <i>Ggta1</i>         | chr2:35400178-35463231    | 10.4835  | 8.6045   | -0.2850 | 0.247155 |
| <i>Itpril1</i>       | chr2:127138771-127143442  | 11.3000  | 10.2228  | -0.1445 | 0.024251 |
| <i>Sgpp2</i>         | chr1:78310345-78420286    | 1.7751   | 2.3206   | 0.3866  | 0.080909 |
| <i>Gm17334</i>       | chr11:53772280-53773187   | 38.5715  | 44.2101  | 0.1968  | 0.019394 |
| <i>Ucp2</i>          | chr7:100493336-100502020  | 40.0688  | 36.6787  | -0.1275 | 0.121372 |
| <i>Usp53</i>         | chr3:122933600-122984447  | 21.2759  | 19.1441  | -0.1523 | 0.113418 |
| <i>Cyp51</i>         | chr5:4081144-4104746      | 20.4106  | 16.7496  | -0.2852 | 0.192681 |
| <i>Urb2</i>          | chr8:124021507-124048505  | 10.7005  | 9.6853   | -0.1438 | 0.085027 |
| <i>Ermp1</i>         | chr19:29608213-29648415   | 6.8422   | 7.7254   | 0.1751  | 0.037688 |
| <i>D030028A08Rik</i> | chr11:96916269-96965060   | 5.0061   | 4.3884   | -0.1900 | 0.066800 |
| <i>Trap1</i>         | chr16:4039970-4077827     | 50.1831  | 46.2432  | -0.1180 | 0.058292 |
| <i>Dnaja3</i>        | chr16:4639988-4707695     | 18.9697  | 17.2323  | -0.1386 | 0.039409 |
| <i>Ralb</i>          | chr1:119470304-119504794  | 1.7845   | 2.2080   | 0.3072  | 0.015334 |
| <i>Entpd6</i>        | chr2:150749041-150771675  | 18.0053  | 16.4407  | -0.1311 | 0.051801 |
| <i>Khdrbs1</i>       | chr4:129703163-129742303  | 26.7459  | 30.3090  | 0.1804  | 0.052305 |
| <i>Z610008E11Rik</i> | chr10:79064373-79097600   | 13.4656  | 15.3747  | 0.1913  | 0.036823 |
| <i>Bsg</i>           | chr10:79704490-79711969   | 36.6320  | 33.3804  | -0.1341 | 0.036207 |
| <i>Flii</i>          | chr11:60714122-60727263   | 49.7002  | 46.4725  | -0.0969 | 0.051930 |
| <i>Baz1a</i>         | chr12:54892988-55014348   | 24.9402  | 29.0479  | 0.2200  | 0.118989 |
| <i>Ppp1cb</i>        | chr5:32458973-32517433    | 30.0590  | 34.6171  | 0.2037  | 0.063510 |
| <i>Zfp629</i>        | chr7:127607030-127615797  | 2.1112   | 1.7322   | -0.2855 | 0.074291 |
| <i>Zwilch</i>        | chr9:64137143-64173104    | 0.8727   | 1.1774   | 0.4319  | 0.012832 |
| <i>Mfng</i>          | chr15:78755881-78773475   | 41.0121  | 38.1979  | -0.1026 | 0.020825 |
| <i>Abcc4</i>         | chr14:118482691-118706219 | 9.8916   | 11.5255  | 0.2205  | 0.107892 |
| <i>Nubp2</i>         | chr17:24882610-24886350   | 28.0189  | 24.8958  | -0.1705 | 0.068600 |
| <i>Tnk2</i>          | chr16:32643873-32683493   | 11.7850  | 9.8415   | -0.2600 | 0.189440 |
| <i>Fbxo9</i>         | chr9:78081498-78109065    | 18.4961  | 16.7052  | -0.1469 | 0.036931 |
| <i>Gm26699</i>       | chr6:38551530-38554007    | 10.5390  | 12.4173  | 0.2366  | 0.045459 |
| <i>4930579G18Rik</i> | chr14:54650510-54654607   | 23.4163  | 27.5022  | 0.2320  | 0.034794 |
| <i>Tmem214</i>       | chr5:30869578-30879191    | 11.6901  | 10.6314  | -0.1369 | 0.078619 |
| <i>Taf10</i>         | chr7:105739392-105744361  | 41.9019  | 38.6563  | -0.1163 | 0.060109 |
| <i>Hars</i>          | chr18:36766529-36783205   | 42.5799  | 38.6732  | -0.1388 | 0.056974 |
| <i>Slc26a10</i>      | chr10:127172425-127180645 | 3.2347   | 4.1292   | 0.3522  | 0.037026 |
| <i>Atg14</i>         | chr14:47540893-47568434   | 4.8676   | 5.7751   | 0.2466  | 0.022321 |
| <i>Ephx1</i>         | chr1:180976154-181020904  | 44.8912  | 50.9938  | 0.1839  | 0.064386 |
| <i>Itfg3</i>         | chr17:26211821-26244223   | 4.7638   | 4.0350   | -0.2395 | 0.065949 |
| <i>Trim35</i>        | chr14:66297030-66311424   | 24.6232  | 22.5016  | -0.1300 | 0.089028 |
| <i>Cbill1</i>        | chr12:31484828-31499616   | 2.8187   | 3.5798   | 0.3449  | 0.073410 |
| <i>Zfp511</i>        | chr7:140036390-140040605  | 24.9717  | 22.0963  | -0.1765 | 0.017856 |
| <i>Trps1</i>         | chr15:50654760-50890041   | 2.8322   | 3.4097   | 0.2677  | 0.120636 |
| <i>Tonsl</i>         | chr15:76626001-76639958   | 2.9539   | 3.6123   | 0.2903  | 0.085483 |
| <i>Hist2h2be</i>     | chr3:96221120-96223738    | 9.8053   | 8.0322   | -0.2878 | 0.143811 |
| <i>Gm21969</i>       | chr4:139603185-139662691  | 7.1049   | 6.3347   | -0.1655 | 0.036130 |
| <i>Ywhae</i>         | chr11:75732868-75765845   | 25.4690  | 29.8594  | 0.2294  | 0.081066 |
| <i>Icam2</i>         | chr11:106377655-106388075 | 30.5500  | 27.6424  | -0.1443 | 0.044537 |
| <i>1600012H06Rik</i> | chr17:14943183-14959570   | 19.6460  | 17.9268  | -0.1321 | 0.027510 |
| <i>Tmem109</i>       | chr19:10870659-10882001   | 5.7642   | 5.0073   | -0.2031 | 0.070907 |
| <i>Msantd2</i>       | chr9:37489320-37524148    | 13.1300  | 11.5997  | -0.1788 | 0.048841 |
| <i>Clpb</i>          | chr7:101663632-101790168  | 4.6473   | 4.1174   | -0.1746 | 0.066841 |
| <i>Sdccag3</i>       | chr2:26382801-26389316    | 45.1005  | 41.1752  | -0.1314 | 0.074359 |
| <i>B3galt6</i>       | chr4:155989465-155992678  | 6.8571   | 5.9778   | -0.1980 | 0.046346 |
| <i>Aco2</i>          | chr15:81872308-81915133   | 47.0627  | 43.7691  | -0.1047 | 0.049077 |
| <i>Gm12531</i>       | chr3:37052214-37060035    | 9.7122   | 13.1970  | 0.4423  | 0.044689 |
| <i>Rbm10</i>         | chrX:20617502-20650901    | 16.4840  | 15.0593  | -0.1304 | 0.024610 |
| <i>Oxa1l</i>         | chr14:54360840-54369669   | 22.1849  | 20.2959  | -0.1284 | 0.038403 |
| <i>Hypk</i>          | chr2:121453289-121458672  | 9.8007   | 11.2573  | 0.1999  | 0.040142 |

|                      |                           |          |          |         |          |
|----------------------|---------------------------|----------|----------|---------|----------|
| <i>Thop1</i>         | chr10:81070034-81082559   | 2.1220   | 1.7272   | -0.2970 | 0.081160 |
| <i>Atp13a2</i>       | chr4:140986872-141007330  | 9.1036   | 8.2106   | -0.1489 | 0.090465 |
| <i>Gm20431</i>       | chr2:167607849-167661496  | 7.7641   | 6.7459   | -0.2028 | 0.023088 |
| <i>Bmpr2</i>         | chr1:59764278-59870549    | 0.9969   | 1.4123   | 0.5026  | 0.054834 |
| <i>Gm20683</i>       | chr17:25834464-25841763   | 18.5682  | 16.3955  | -0.1795 | 0.108203 |
| <i>4921514A10Rik</i> | chr4:141115659-141118087  | 8.1274   | 6.9172   | -0.2326 | 0.058935 |
| <i>Calcr1</i>        | chr2:84330625-84425411    | 27.3247  | 24.3465  | -0.1665 | 0.111265 |
| <i>Phkb</i>          | chr8:85840958-86061376    | 4.9265   | 5.5830   | 0.1805  | 0.006943 |
| <i>Ino80</i>         | chr2:119373041-119477687  | 19.1980  | 21.4336  | 0.1589  | 0.041926 |
| <i>Tbc1d31</i>       | chr15:57912198-57970067   | 1.0586   | 1.3463   | 0.3468  | 0.032822 |
| <i>Cd82</i>          | chr2:93419110-93463140    | 49.8613  | 59.3448  | 0.2512  | 0.150716 |
| <i>Engase</i>        | chr11:118476828-118489209 | 2.7889   | 2.3627   | -0.2393 | 0.050395 |
| <i>D630044L22Rik</i> | chr17:25951471-25963610   | 1.2735   | 1.7983   | 0.4978  | 0.098621 |
| <i>Asb6</i>          | chr2:30823096-30830333    | 10.3378  | 9.3136   | -0.1505 | 0.104098 |
| <i>Nrros</i>         | chr16:32142784-32165594   | 33.1807  | 28.9569  | -0.1964 | 0.153441 |
| <i>Itgal</i>         | chr7:127296259-127335137  | 32.5658  | 39.2667  | 0.2699  | 0.189305 |
| <i>Ube2b</i>         | chr11:51985496-52000762   | 36.1097  | 41.3451  | 0.1953  | 0.052161 |
| <i>Clasp2</i>        | chr9:113812585-113919697  | 20.1604  | 18.1174  | -0.1541 | 0.112472 |
| <i>Dnm1</i>          | chr16:16312234-16359030   | 28.6794  | 32.0128  | 0.1586  | 0.029150 |
| <i>Trmt61a</i>       | chr12:111678104-111683902 | 8.7952   | 7.5239   | -0.2252 | 0.080575 |
| <i>Sppl2b</i>        | chr10:80855274-80868705   | 9.4869   | 8.3671   | -0.1812 | 0.062833 |
| <i>Cd164</i>         | chr10:41519499-41531042   | 81.7798  | 91.1007  | 0.1557  | 0.034304 |
| <i>Atp5h</i>         | chr11:115415688-115419962 | 48.4250  | 41.1274  | -0.2357 | 0.137975 |
| <i>Zfp568</i>        | chr7:29983954-30028282    | 6.0918   | 5.3541   | -0.1862 | 0.139676 |
| <i>Gm26827</i>       | chr7:66109514-66173121    | 3.0794   | 4.5302   | 0.5569  | 0.172887 |
| <i>Ccdc102a</i>      | chr8:94902868-94918098    | 2.0246   | 1.5834   | -0.3546 | 0.000051 |
| <i>D230025D16Rik</i> | chr8:105225144-105253053  | 7.3478   | 6.5724   | -0.1609 | 0.040726 |
| <i>Tra2b</i>         | chr16:22244548-22266005   | 21.6837  | 24.3609  | 0.1680  | 0.032314 |
| <i>Mrps5</i>         | chr2:127587221-127606829  | 8.1960   | 6.9396   | -0.2401 | 0.189373 |
| <i>Utp11l</i>        | chr4:124678159-124693600  | 7.9261   | 9.1500   | 0.2072  | 0.037549 |
| <i>Casp1</i>         | chr9:5298516-5307265      | 13.0813  | 21.7602  | 0.7342  | 0.131428 |
| <i>A630052C17Rik</i> | chr11:29170908-29173558   | 11.1914  | 9.8773   | -0.1802 | 0.026629 |
| <i>Gm26514</i>       | chr13:38945542-38951313   | 2.4623   | 3.0712   | 0.3188  | 0.067920 |
| <i>Usb1</i>          | chr8:95332291-95347507    | 13.3532  | 12.0020  | -0.1539 | 0.041401 |
| <i>NA</i>            | chr4:155694341-155696481  | 6.0656   | 4.8876   | -0.3115 | 0.130596 |
| <i>B930041F14Rik</i> | chr4:155694341-155696481  | 6.0599   | 4.8831   | -0.3115 | 0.130596 |
| <i>Dapk3</i>         | chr10:81183006-81193197   | 21.6913  | 19.4821  | -0.1550 | 0.048879 |
| <i>Arl4a</i>         | chr12:40005446-40038025   | 3.6096   | 4.2726   | 0.2433  | 0.066212 |
| <i>Chst2</i>         | chr9:95400928-95407270    | 1.0775   | 2.6544   | 1.3008  | 0.147895 |
| <i>Notch4</i>        | chr17:34564267-34588503   | 1.9702   | 1.6583   | -0.2486 | 0.082326 |
| <i>Ablim1</i>        | chr19:57032732-57314919   | 103.9471 | 117.3221 | 0.1746  | 0.061506 |
| <i>Ciz1</i>          | chr2:32352326-32380226    | 9.2371   | 10.9054  | 0.2395  | 0.125881 |
| <i>Pigx</i>          | chr16:32084419-32099738   | 24.3847  | 21.6869  | -0.1692 | 0.081255 |
| <i>Sun2</i>          | chr15:79724069-79742536   | 150.4528 | 138.6347 | -0.1180 | 0.145687 |
| <i>Zfp335os</i>      | chr2:164911353-164919953  | 6.9158   | 5.5880   | -0.3076 | 0.037280 |
| <i>Nisch</i>         | chr14:31170929-31216946   | 21.8342  | 25.2568  | 0.2101  | 0.126520 |
| <i>Mettl22</i>       | chr16:8470787-8490684     | 6.4297   | 5.4528   | -0.2377 | 0.085669 |
| <i>Tmem143</i>       | chr7:45896940-45917413    | 3.2034   | 2.7342   | -0.2285 | 0.079165 |
| <i>Pstpip1</i>       | chr9:56089961-56128888    | 50.6481  | 47.3267  | -0.0979 | 0.034869 |
| <i>Bap1</i>          | chr14:31251488-31259929   | 30.8003  | 28.5520  | -0.1093 | 0.033399 |
| <i>Itk</i>           | chr11:46325149-46389515   | 160.0536 | 147.5614 | -0.1172 | 0.082111 |
| <i>1700034P13Rik</i> | chr1:9747647-9791922      | 4.4149   | 5.6835   | 0.3644  | 0.114104 |
| <i>Ascl4</i>         | chr10:85928490-85946206   | 7.8217   | 6.3635   | -0.2977 | 0.085344 |
| <i>Fkrp</i>          | chr7:16809269-16816732    | 12.7292  | 11.3943  | -0.1598 | 0.060761 |
| <i>Nppla2</i>        | chr7:141455197-141460743  | 9.8859   | 12.1405  | 0.2964  | 0.130665 |
| <i>Slc23a1</i>       | chr18:35614603-35627244   | 1.1483   | 1.5719   | 0.4529  | 0.034202 |
| <i>Mfsd5</i>         | chr15:102279455-102281744 | 17.5365  | 15.3430  | -0.1928 | 0.089188 |
| <i>Itgb2</i>         | chr10:77530251-77565708   | 172.1667 | 162.2447 | -0.0856 | 0.050649 |
| <i>Sco2</i>          | chr15:89371638-89373818   | 22.3175  | 19.7229  | -0.1783 | 0.046082 |
| <i>Lmo4</i>          | chr3:144188529-144205220  | 9.6396   | 8.3553   | -0.2063 | 0.085637 |
| <i>N4bp2l1</i>       | chr5:150571642-150594525  | 24.9695  | 28.0933  | 0.1701  | 0.010479 |
| <i>Jazf1</i>         | chr6:52768796-53068631    | 2.3880   | 3.1543   | 0.4015  | 0.085206 |
| <i>Psmc7</i>         | chr8:107580380-107588482  | 19.0062  | 22.5376  | 0.2459  | 0.081460 |
| <i>Dhodh</i>         | chr8:109591342-109608673  | 4.8755   | 4.2461   | -0.1994 | 0.099148 |
| <i>Fbxo31</i>        | chr8:121549439-121578806  | 6.7434   | 5.8721   | -0.1996 | 0.126069 |
| <i>A1413582</i>      | chr17:27563574-27565749   | 27.0786  | 24.4153  | -0.1494 | 0.024992 |
| <i>Cd47</i>          | chr16:49855617-49915010   | 34.7811  | 37.9440  | 0.1256  | 0.008076 |
| <i>Pou2f1</i>        | chr1:165865153-166002678  | 11.1905  | 12.8945  | 0.2045  | 0.118387 |
| <i>Mllt11</i>        | chr3:95219134-95228677    | 15.4232  | 13.5315  | -0.1888 | 0.056208 |
| <i>Sike1</i>         | chr3:102995727-103003914  | 20.2076  | 18.5185  | -0.1259 | 0.053459 |
| <i>Sars</i>          | chr3:108424864-108445209  | 63.2925  | 58.2972  | -0.1186 | 0.093820 |

|                      |                           |          |          |         |          |
|----------------------|---------------------------|----------|----------|---------|----------|
| <i>Imp4</i>          | chr1:34439850-34445736    | 26.6677  | 24.6539  | -0.1133 | 0.009928 |
| <i>Zbtb2</i>         | chr10:4367073-4388108     | 18.6569  | 16.9040  | -0.1423 | 0.060501 |
| <i>Trim24</i>        | chr6:37870810-37966296    | 12.9263  | 11.9540  | -0.1128 | 0.068126 |
| <i>Rrad</i>          | chr8:104628065-104631321  | 18.2364  | 16.2622  | -0.1653 | 0.042179 |
| <i>Wdr43</i>         | chr17:71616214-71659031   | 61.7509  | 57.2398  | -0.1094 | 0.054452 |
| <i>Nans</i>          | chr4:46489247-46503632    | 15.5384  | 14.1115  | -0.1390 | 0.047030 |
| <i>Fig4</i>          | chr10:41188171-41303241   | 16.6891  | 15.2004  | -0.1348 | 0.032200 |
| <i>Dido1</i>         | chr2:180657963-180709999  | 32.8094  | 30.4604  | -0.1072 | 0.111715 |
| <i>Itgb8</i>         | chr12:119158021-119238802 | 0.6597   | 1.6039   | 1.2818  | 0.129104 |
| <i>Inafm2</i>        | chr2:118745757-118748810  | 8.2411   | 7.2579   | -0.1833 | 0.036689 |
| <i>Nudt3</i>         | chr17:27579381-27623465   | 38.9311  | 34.3297  | -0.1815 | 0.123501 |
| <i>Rfxap</i>         | chr3:54803114-54807791    | 10.8804  | 9.5747   | -0.1844 | 0.038176 |
| <i>Gltf</i>          | chr5:114669402-114690984  | 44.4770  | 39.0203  | -0.1888 | 0.142838 |
| <i>Zcchc2</i>        | chr1:105990405-106034074  | 13.1073  | 15.3577  | 0.2286  | 0.142792 |
| <i>6430550D23Rik</i> | chr2:155973278-156007977  | 2.6976   | 3.3240   | 0.3012  | 0.096764 |
| <i>Ctla</i>          | chr4:44004451-44032846    | 87.1119  | 76.2637  | -0.1919 | 0.136955 |
| <i>Mfsd3</i>         | chr15:76701541-76704239   | 4.2064   | 3.4369   | -0.2915 | 0.047634 |
| <i>Pfdn2</i>         | chr1:171345669-171359254  | 3.6508   | 4.6500   | 0.3490  | 0.055166 |
| <i>Top2</i>          | chr1:43934001-44002999    | 52.5896  | 59.0045  | 0.1660  | 0.064120 |
| <i>Cdk2</i>          | chr10:128697938-128705051 | 17.2919  | 15.4306  | -0.1643 | 0.055246 |
| <i>Dis3</i>          | chr14:99076633-99099770   | 14.1132  | 12.7107  | -0.1510 | 0.087911 |
| <i>Zfp954</i>        | chr7:7114689-7121445      | 18.7155  | 16.7673  | -0.1586 | 0.034797 |
| <i>Kctd5</i>         | chr17:24047733-24073485   | 11.8596  | 10.6260  | -0.1585 | 0.025476 |
| <i>Zbtb7a</i>        | chr10:81135219-81152995   | 7.0059   | 8.6016   | 0.2960  | 0.153864 |
| <i>Ptms</i>          | chr6:124913680-124917946  | 13.4784  | 16.8501  | 0.3221  | 0.153864 |
| <i>Gnptab</i>        | chr10:88379131-88447329   | 9.1369   | 10.6734  | 0.2243  | 0.121693 |
| <i>Elac2</i>         | chr11:64979037-65002069   | 18.0333  | 16.4433  | -0.1332 | 0.058708 |
| <i>Kat8</i>          | chr7:127912516-127925832  | 23.2117  | 20.6188  | -0.1709 | 0.070443 |
| <i>Psd4</i>          | chr2:24367579-24409182    | 72.7801  | 67.6605  | -0.1052 | 0.109791 |
| <i>Tcf25</i>         | chr8:123373823-123404173  | 123.4033 | 115.3934 | -0.0968 | 0.115311 |
| <i>Trim12c</i>       | chr7:104338753-104353362  | 31.8386  | 36.4365  | 0.1946  | 0.091568 |
| <i>Grwd1</i>         | chr7:45825226-45830944    | 15.2748  | 13.5616  | -0.1716 | 0.066810 |
| <i>Hectd3</i>        | chr4:116995316-117005277  | 23.3275  | 21.3555  | -0.1274 | 0.120339 |
| <i>Hus1</i>          | chr11:8993136-9011191     | 4.2662   | 3.7447   | -0.1881 | 0.079374 |
| <i>Tnip2</i>         | chr5:34496086-34513997    | 9.0681   | 10.5798  | 0.2224  | 0.060221 |
| <i>Fan1</i>          | chr7:64346757-64374095    | 3.4374   | 4.0965   | 0.2530  | 0.055344 |
| <i>Slc20a2</i>       | chr8:22476699-22569607    | 2.4993   | 3.1597   | 0.3382  | 0.083389 |
| <i>Qrt1</i>          | chr9:21411836-21420277    | 20.3033  | 17.5158  | -0.2131 | 0.128274 |
| <i>Zfp202</i>        | chr9:40192315-40213604    | 1.2996   | 1.6601   | 0.3532  | 0.002764 |
| <i>Nt5e</i>          | chr9:88327608-88372089    | 21.4884  | 35.6242  | 0.7293  | 0.124637 |
| <i>Snrk</i>          | chr9:122117282-122169702  | 22.9252  | 21.1602  | -0.1156 | 0.082203 |
| <i>Slc38a1</i>       | chr15:96571417-96642913   | 16.4612  | 19.0298  | 0.2092  | 0.126295 |
| <i>Parp14</i>        | chr16:35832873-35871544   | 42.6191  | 49.7663  | 0.2237  | 0.144026 |
| <i>Brms1</i>         | chr19:5041403-5049917     | 27.0985  | 23.8873  | -0.1820 | 0.113424 |
| <i>Ctla4</i>         | chr1:60886999-60915832    | 11.8602  | 23.6615  | 0.9964  | 0.180024 |
| <i>Gin1</i>          | chr1:97770171-97793709    | 3.1211   | 3.7642   | 0.2703  | 0.026264 |
| <i>Rnf125</i>        | chr18:20944624-20983848   | 31.7304  | 27.2317  | -0.2206 | 0.132347 |
| <i>Ada</i>           | chr2:163726583-163750239  | 7.0973   | 6.0551   | -0.2291 | 0.050837 |
| <i>NA</i>            | chr4:32243732-32246475    | 7.4884   | 9.0051   | 0.2661  | 0.104452 |
| <i>Gbf1</i>          | chr19:46152508-46286510   | 9.0096   | 10.2747  | 0.1896  | 0.098108 |
| <i>Rpgrip1l</i>      | chr8:91217029-91313262    | 0.5053   | 0.6637   | 0.3932  | 0.051948 |
| <i>Egln1</i>         | chr8:124908595-124949254  | 18.1964  | 20.5466  | 0.1752  | 0.031194 |
| <i>Gcc2</i>          | chr10:58255496-58305599   | 10.2602  | 11.3377  | 0.1441  | 0.009815 |
| <i>Snrnp40</i>       | chr4:130360131-130390026  | 16.8875  | 15.3351  | -0.1391 | 0.051997 |
| <i>Unc13d</i>        | chr11:116062094-116077961 | 50.2499  | 45.7046  | -0.1368 | 0.149999 |
| <i>1700022111Rik</i> | chr4:42969945-42983639    | 4.5153   | 5.2206   | 0.2094  | 0.003788 |
| <i>Haus6</i>         | chr4:86578854-86612055    | 7.3789   | 8.2947   | 0.1688  | 0.014482 |
| <i>Emg1</i>          | chr6:124704380-124712178  | 133.7626 | 119.1860 | -0.1665 | 0.129356 |
| <i>Ramp1</i>         | chr1:91179821-91225196    | 18.9283  | 16.2853  | -0.2170 | 0.146590 |
| <i>Rin3</i>          | chr12:102283047-102390855 | 6.5537   | 7.8442   | 0.2593  | 0.135589 |
| <i>Prkar1a</i>       | chr11:109649404-109669656 | 51.8617  | 59.9963  | 0.2102  | 0.122629 |
| <i>Tmem126b</i>      | chr7:90468193-90476001    | 5.9487   | 7.0090   | 0.2366  | 0.055024 |
| <i>Kdm7a</i>         | chr6:39136622-39206789    | 26.9470  | 29.8807  | 0.1491  | 0.038220 |
| <i>Galnt2</i>        | chr8:124231390-124345724  | 32.4575  | 29.7810  | -0.1242 | 0.113350 |
| <i>Rexo4</i>         | chr2:26953562-26964386    | 25.2124  | 23.5475  | -0.0986 | 0.003221 |
| <i>Ing3</i>          | chr6:21949570-21976038    | 12.3715  | 11.2901  | -0.1320 | 0.031976 |
| <i>Hvcn1</i>         | chr5:122206803-122242297  | 47.2356  | 42.8763  | -0.1397 | 0.123006 |
| <i>Nfkbid</i>        | chr7:30421731-30428746    | 32.6177  | 29.8034  | -0.1302 | 0.078288 |
| <i>Gm20388</i>       | chr8:119910840-124345722  | 35.1058  | 32.2344  | -0.1231 | 0.113486 |
| <i>Atg101</i>        | chr15:101284300-101290934 | 19.6687  | 17.3517  | -0.1808 | 0.045846 |
| <i>Snhg7</i>         | chr2:26637176-26640244    | 13.9630  | 12.1853  | -0.1965 | 0.112439 |



|                      |                           |          |          |         |          |
|----------------------|---------------------------|----------|----------|---------|----------|
| <i>Pih1d1</i>        | chr7:45154302-45160069    | 16.8143  | 15.0074  | -0.1640 | 0.039995 |
| <i>Traf4</i>         | chr11:78158498-78165589   | 13.0768  | 11.4091  | -0.1968 | 0.155295 |
| <i>Arhgap20</i>      | chr9:51765336-51853856    | 0.2942   | 0.4209   | 0.5167  | 0.104009 |
| <i>Cldn25</i>        | chr16:58727909-58734251   | 4.1651   | 5.3631   | 0.3647  | 0.122484 |
| <i>Fgf2</i>          | chr3:37312518-37405377    | 2.7136   | 3.5589   | 0.3912  | 0.050838 |
| <i>Polr3b</i>        | chr10:84622436-84727177   | 24.3102  | 22.8158  | -0.0915 | 0.018314 |
| <i>4930403D09Rik</i> | chr11:34299706-34308113   | 11.8713  | 15.6958  | 0.4029  | 0.143425 |
| <i>BC017643</i>      | chr11:121222587-121229322 | 25.7005  | 23.3964  | -0.1355 | 0.132185 |
| <i>Entpd5</i>        | chr12:84373856-84409029   | 24.7208  | 22.4939  | -0.1362 | 0.094683 |
| <i>Hist1h1b</i>      | chr13:21779882-21780625   | 20.4857  | 33.4977  | 0.7094  | 0.145693 |
| <i>Tmed9</i>         | chr13:55593134-55597663   | 40.9091  | 46.2396  | 0.1767  | 0.035031 |
| <i>Mxd4</i>          | chr5:34173886-34187720    | 35.6291  | 31.8970  | -0.1596 | 0.128436 |
| <i>Prkcb</i>         | chr7:122288750-122634402  | 37.8849  | 34.8703  | -0.1196 | 0.103191 |
| <i>Vps26b</i>        | chr9:27004502-27030094    | 26.5156  | 24.5189  | -0.1129 | 0.055698 |
| <i>Pdcd7</i>         | chr9:65346067-65359642    | 15.3812  | 13.9090  | -0.1451 | 0.029250 |
| <i>Tfe3</i>          | chrX:7762559-7775202      | 2.3680   | 2.8306   | 0.2574  | 0.078826 |
| <i>Cdk5rap2</i>      | chr4:70216855-70410443    | 5.7240   | 6.3937   | 0.1596  | 0.023195 |
| <i>G3bp1</i>         | chr11:55469684-55504838   | 35.0974  | 32.9382  | -0.0916 | 0.028269 |
| <i>Gm14540</i>       | chr6:33038467-33043222    | 1.2669   | 1.7476   | 0.4641  | 0.089685 |
| <i>Zbtb10</i>        | chr3:9250601-9285333      | 0.6869   | 0.8792   | 0.3561  | 0.005218 |
| <i>Zfp935</i>        | chr13:62454322-62466709   | 9.0322   | 10.9107  | 0.2726  | 0.004408 |
| <i>She</i>           | chr3:89831369-89858834    | 1.1144   | 1.5229   | 0.4505  | 0.161681 |
| <i>Jak1</i>          | chr4:101152366-101265282  | 140.8301 | 152.6782 | 0.1165  | 0.012283 |
| <i>Ppap2a</i>        | chr13:112800893-112867881 | 2.1295   | 2.8553   | 0.4231  | 0.021633 |
| <i>Usp2</i>          | chr9:44067020-44095627    | 0.7285   | 1.0552   | 0.5345  | 0.111777 |
| <i>Taf2</i>          | chr15:55015128-55072152   | 20.3010  | 18.9098  | -0.1024 | 0.033688 |
| <i>Bend3</i>         | chr10:43479139-43515396   | 1.8575   | 2.3122   | 0.3159  | 0.098654 |
| <i>Casp7</i>         | chr19:56397128-56442344   | 6.2606   | 7.9398   | 0.3428  | 0.135913 |
| <i>Rap2b</i>         | chr3:61364506-61368703    | 12.2580  | 14.7410  | 0.2661  | 0.114197 |
| <i>Smcr8</i>         | chr11:60777524-60788287   | 17.8761  | 19.9726  | 0.1600  | 0.053749 |
| <i>Nr4a3</i>         | chr4:48045152-48086447    | 1.4870   | 1.9976   | 0.4258  | 0.175358 |
| <i>Hat1</i>          | chr2:71388957-71441622    | 9.8772   | 11.7687  | 0.2528  | 0.111027 |
| <i>Pogk</i>          | chr1:166384621-166409863  | 3.9966   | 4.7681   | 0.2546  | 0.111962 |
| <i>B630005N14Rik</i> | chr6:13625676-13677966    | 19.6950  | 17.6179  | -0.1608 | 0.100945 |
| <i>Tspan9</i>        | chr6:127961395-128143594  | 2.1701   | 2.9935   | 0.4641  | 0.142610 |
| <i>Zfp219</i>        | chr14:52006076-52020733   | 6.7349   | 5.8291   | -0.2084 | 0.100567 |
| <i>Nfkb2</i>         | chr19:46304736-46312090   | 20.7674  | 24.4467  | 0.2353  | 0.128150 |
| <i>Ppm1h</i>         | chr10:122678761-122945795 | 31.7309  | 29.5930  | -0.1006 | 0.088673 |
| <i>BC003965</i>      | chr17:25184560-25187661   | 14.6738  | 12.9642  | -0.1787 | 0.119720 |
| <i>Usp4</i>          | chr9:108347830-108392529  | 44.5798  | 49.0460  | 0.1377  | 0.016218 |
| <i>Dlgap5</i>        | chr14:47387778-47418407   | 2.0728   | 2.5560   | 0.3023  | 0.087509 |
| <i>Mam12</i>         | chr9:13619989-13709533    | 10.1999  | 12.0993  | 0.2464  | 0.135347 |
| <i>Lin54</i>         | chr5:100441917-100500639  | 8.4385   | 9.9786   | 0.2418  | 0.102550 |
| <i>Det1</i>          | chr7:78822961-78847236    | 11.4232  | 10.1833  | -0.1658 | 0.071155 |
| <i>Eea1</i>          | chr10:95940662-96045518   | 5.2925   | 11.8334  | 1.1608  | 0.179397 |
| <i>Cdca8</i>         | chr4:124918464-124939311  | 0.9538   | 1.2759   | 0.4197  | 0.122511 |
| <i>Tut1</i>          | chr19:8953849-8966207     | 28.1345  | 25.8188  | -0.1239 | 0.073146 |
| <i>Lcor1</i>         | chr5:45697180-45857615    | 2.9413   | 3.4033   | 0.2105  | 0.059173 |
| <i>Elovl5</i>        | chr9:77917363-77984519    | 80.0158  | 72.2265  | -0.1478 | 0.139680 |
| <i>Morf4l1</i>       | chr9:90091670-90114820    | 8.7844   | 10.2886  | 0.2280  | 0.009327 |
| <i>Ubn2</i>          | chr6:38433949-38524825    | 5.3471   | 6.0664   | 0.1821  | 0.091589 |
| <i>Golim4</i>        | chr3:75876182-75956949    | 2.5092   | 2.9882   | 0.2521  | 0.098659 |
| <i>Cdt1</i>          | chr8:122568014-122573128  | 14.4099  | 13.0102  | -0.1474 | 0.018409 |
| <i>3632454L22Rik</i> | chrX:135022733-135060336  | 0.9495   | 1.2710   | 0.4206  | 0.093300 |
| <i>Cep85</i>         | chr4:134129857-134187112  | 12.3601  | 11.3506  | -0.1229 | 0.024678 |
| <i>Sgk1</i>          | chr10:21882183-21999903   | 28.9736  | 25.0644  | -0.2091 | 0.205628 |
| <i>Ranbp9</i>        | chr13:43402672-43480973   | 50.4780  | 55.6738  | 0.1413  | 0.029168 |
| <i>Cd22</i>          | chr7:30865401-30880342    | 1.2768   | 2.4616   | 0.9470  | 0.134736 |
| <i>Rrp12</i>         | chr19:41862851-41896153   | 13.4839  | 12.4190  | -0.1187 | 0.020239 |
| <i>Lrrc59</i>        | chr11:94629766-94645216   | 20.9885  | 19.3750  | -0.1154 | 0.009084 |
| <i>Setd1a</i>        | chr7:127776669-127800122  | 5.5167   | 6.4986   | 0.2363  | 0.129663 |
| <i>Yrdc</i>          | chr4:124850678-124855242  | 21.8886  | 19.8634  | -0.1401 | 0.044845 |
| <i>Xrcc6</i>         | chr15:81987834-82040085   | 12.6957  | 11.5018  | -0.1425 | 0.050769 |
| <i>Gm10392</i>       | chr11:77516659-77519198   | 3.8426   | 3.0295   | -0.3430 | 0.076585 |
| <i>NA</i>            | chr8:8689665-8690644      | 30.7427  | 25.6454  | -0.2615 | 0.057881 |
| <i>Cmtm6</i>         | chr9:114731202-114749343  | 70.3847  | 65.0075  | -0.1147 | 0.097923 |
| <i>Psmd5</i>         | chr2:34852087-34870939    | 19.8266  | 17.8712  | -0.1498 | 0.085140 |
| <i>Gm26826</i>       | chr6:122813625-122820614  | 2.7849   | 3.6794   | 0.4018  | 0.021468 |
| <i>E130311K13Rik</i> | chr3:63914683-63929472    | 2.4585   | 3.2043   | 0.3822  | 0.074647 |
| <i>Dsn1</i>          | chr2:156995264-157007154  | 3.3208   | 4.0009   | 0.2688  | 0.032177 |
| <i>Tdo2</i>          | chr3:81957089-81975750    | 1.2805   | 1.7091   | 0.4165  | 0.077390 |

|                      |                           |          |          |         |          |
|----------------------|---------------------------|----------|----------|---------|----------|
| <i>Prg4</i>          | chr1:150449411-150466165  | 4.5624   | 5.3961   | 0.2421  | 0.064657 |
| <i>Pou6f1</i>        | chr15:100575317-100599984 | 6.6434   | 7.8744   | 0.2452  | 0.123965 |
| <i>Ppp1r3f</i>       | chrX:7557295-7605381      | 9.9970   | 8.8416   | -0.1772 | 0.153195 |
| <i>Hprt</i>          | chrX:52988136-53021659    | 41.8076  | 51.1937  | 0.2922  | 0.143807 |
| <i>Ehmt2</i>         | chr17:34898468-34914052   | 28.5256  | 26.3790  | -0.1129 | 0.111342 |
| <i>Mex3d</i>         | chr10:80380354-80387659   | 3.9230   | 3.2937   | -0.2523 | 0.095759 |
| <i>Wars</i>          | chr12:108860029-108894174 | 21.2239  | 19.7398  | -0.1046 | 0.017415 |
| <i>Ptdss1</i>        | chr13:66932829-66998401   | 27.3521  | 24.8410  | -0.1389 | 0.129991 |
| <i>Ncapg</i>         | chr5:45669921-45700544    | 1.3474   | 1.8803   | 0.4808  | 0.206148 |
| <i>Sec61a1</i>       | chr6:88503600-88518905    | 33.4774  | 31.4720  | -0.0891 | 0.050433 |
| <i>Lsm14a</i>        | chr7:34344645-34389540    | 27.1537  | 30.3635  | 0.1612  | 0.025319 |
| <i>Taf5l</i>         | chr8:123996317-124021309  | 25.3776  | 23.5291  | -0.1091 | 0.018561 |
| <i>Vps13d</i>        | chr4:144972625-145194995  | 14.6683  | 17.0330  | 0.2156  | 0.154315 |
| <i>Dph2</i>          | chr4:117888642-117892032  | 11.9690  | 10.6950  | -0.1624 | 0.098206 |
| <i>Zfp207</i>        | chr11:80383278-80405733   | 80.4287  | 75.3503  | -0.0941 | 0.078907 |
| <i>Pdcd2l</i>        | chr7:34184498-34196661    | 13.4821  | 11.8236  | -0.1894 | 0.010012 |
| <i>Rnps1</i>         | chr17:24414674-24425895   | 15.7832  | 14.1850  | -0.1540 | 0.020802 |
| <i>Slc12a2</i>       | chr18:57878677-57946821   | 2.3289   | 2.9230   | 0.3278  | 0.144418 |
| <i>Hist1h1d</i>      | chr13:23555031-23558852   | 16.2284  | 20.3957  | 0.3297  | 0.197150 |
| <i>Polh</i>          | chr17:46172003-46202625   | 16.7147  | 14.9339  | -0.1625 | 0.083110 |
| <i>Ash1l</i>         | chr3:88965811-89079373    | 25.9798  | 29.3462  | 0.1758  | 0.112269 |
| <i>Pttg1ip</i>       | chr10:77581719-77598732   | 22.2576  | 20.4847  | -0.1198 | 0.072516 |
| <i>Traj19</i>        | chr14:54200385-54200446   | 105.3962 | 132.4685 | 0.3298  | 0.028686 |
| <i>Farp1</i>         | chr14:121035199-121283744 | 1.3576   | 1.8980   | 0.4835  | 0.241512 |
| <i>Tstd3</i>         | chr4:21757381-21767212    | 4.2923   | 5.6347   | 0.3926  | 0.105600 |
| <i>Gm20696</i>       | chr6:99257483-99666797    | 15.0966  | 17.9335  | 0.2484  | 0.161515 |
| <i>Ppp2r5d</i>       | chr17:46682990-46705002   | 29.2027  | 27.0425  | -0.1109 | 0.024565 |
| <i>Lrwd1</i>         | chr5:136122771-136136074  | 13.7633  | 12.5841  | -0.1292 | 0.075114 |
| <i>Pik3r2</i>        | chr8:70768175-70776713    | 7.8059   | 6.9585   | -0.1658 | 0.086757 |
| <i>Jak2</i>          | chr19:29251827-29313080   | 57.0990  | 64.8343  | 0.1833  | 0.108765 |
| <i>Cir1</i>          | chr2:73283104-73312701    | 1.9668   | 2.5040   | 0.3484  | 0.055750 |
| <i>Insig2</i>        | chr1:121304352-121332589  | 4.8772   | 5.8486   | 0.2621  | 0.087804 |
| <i>Gm5134</i>        | chr10:75954513-76009591   | 1.2130   | 1.6551   | 0.4484  | 0.052475 |
| <i>Gns</i>           | chr10:121365089-121397245 | 10.0373  | 11.3562  | 0.1781  | 0.021088 |
| <i>Kdelr2</i>        | chr5:143403819-143421900  | 17.7290  | 15.5865  | -0.1858 | 0.107919 |
| <i>A430035B10Rik</i> | chr6:8488794-8510430      | 1.7943   | 1.4998   | -0.2587 | 0.014644 |
| <i>1700049G17Rik</i> | chr7:27907391-27929460    | 2.3528   | 2.7973   | 0.2496  | 0.068197 |
| <i>Pde11a</i>        | chr2:75989140-76338774    | 1.4579   | 1.8449   | 0.3396  | 0.056263 |
| <i>Fam20a</i>        | chr11:109669748-109722279 | 0.8649   | 1.9702   | 1.1877  | 0.188306 |
| <i>A230050P20Rik</i> | chr9:20868641-20874307    | 10.3809  | 12.8016  | 0.3024  | 0.188307 |
| <i>Slain1os</i>      | chr14:103692982-103699442 | 5.6058   | 4.8181   | -0.2184 | 0.103771 |
| <i>Wdr24</i>         | chr17:25823626-25828730   | 16.1382  | 14.2040  | -0.1842 | 0.173439 |
| <i>Zmat3</i>         | chr3:32334795-32365678    | 1.4020   | 1.1833   | -0.2446 | 0.049372 |
| <i>Arl4c</i>         | chr1:88673124-88702221    | 206.9614 | 189.1614 | -0.1297 | 0.124395 |
| <i>Zdhhc13</i>       | chr7:48789002-48827440    | 23.1805  | 21.1953  | -0.1292 | 0.028810 |
| <i>Ripk1</i>         | chr13:34002362-34035170   | 24.1177  | 22.4011  | -0.1065 | 0.092661 |
| <i>Rgs12</i>         | chr5:34949444-35039644    | 2.3810   | 1.9774   | -0.2680 | 0.173328 |
| <i>Zfp180</i>        | chr7:24081923-24107698    | 22.3230  | 20.5790  | -0.1174 | 0.067207 |
| <i>Gm17077</i>       | chr7:30955824-30958004    | 23.4513  | 18.9869  | -0.3047 | 0.015269 |
| <i>Ciapi1</i>        | chr8:94819817-94838358    | 6.5025   | 5.9150   | -0.1366 | 0.018685 |
| <i>Mon1b</i>         | chr8:113635585-113645178  | 11.5611  | 10.5955  | -0.1258 | 0.071828 |
| <i>Rora</i>          | chr9:68653785-69388246    | 2.0550   | 2.6673   | 0.3762  | 0.221791 |
| <i>Gm10250</i>       | chr15:5120601-5121172     | 9.4744   | 7.1811   | -0.3998 | 0.109643 |
| <i>Gm11131</i>       | chr17:35377020-35380292   | 55.2771  | 49.6279  | -0.1555 | 0.182426 |
| <i>Klc4</i>          | chr17:46630630-46645144   | 10.2178  | 8.8076   | -0.2143 | 0.127236 |
| <i>Med15</i>         | chr16:17651220-17722930   | 9.3569   | 11.7814  | 0.3324  | 0.203036 |
| <i>Mrpl49</i>        | chr19:6053629-6057751     | 25.7988  | 22.7300  | -0.1827 | 0.131288 |
| <i>Lipt1</i>         | chr1:37871737-37877387    | 3.9985   | 4.8003   | 0.2637  | 0.041155 |
| <i>Gpcpd1</i>        | chr2:132529081-132587729  | 31.8125  | 35.7114  | 0.1668  | 0.064846 |
| <i>Slc25a19</i>      | chr11:115614177-115628295 | 9.0676   | 8.0904   | -0.1645 | 0.090172 |
| <i>Uba2</i>          | chr7:34140688-34169599    | 43.8215  | 40.5339  | -0.1125 | 0.063748 |
| <i>Ppp1r3b</i>       | chr8:35375740-35388124    | 3.8082   | 3.1999   | -0.2511 | 0.103571 |
| <i>Cryz1l</i>        | chr16:91689321-91728975   | 5.1508   | 5.9104   | 0.1984  | 0.003307 |
| <i>Gm9821</i>        | chr2:91945702-91947655    | 7.9549   | 10.1645  | 0.3536  | 0.184266 |
| <i>Ctnnb1</i>        | chr2:157737400-157891614  | 30.6771  | 27.4279  | -0.1615 | 0.136957 |
| <i>1600020E01Rik</i> | chr6:86526270-86564442    | 23.0479  | 20.6770  | -0.1566 | 0.092089 |
| <i>Dzip1</i>         | chr14:118875519-118925314 | 18.1597  | 16.3160  | -0.1545 | 0.132812 |
| <i>Rbm25</i>         | chr12:83631235-83683123   | 25.9998  | 28.3641  | 0.1256  | 0.029666 |
| <i>Akt1</i>          | chr12:112653820-112674884 | 33.9211  | 31.5259  | -0.1056 | 0.095099 |
| <i>Oasl2</i>         | chr5:114896935-114912234  | 3.7581   | 6.5119   | 0.7931  | 0.097904 |
| <i>Setd2</i>         | chr9:110532596-110618633  | 23.6933  | 27.0656  | 0.1920  | 0.147075 |

|               |                           |          |          |         |          |
|---------------|---------------------------|----------|----------|---------|----------|
| Ar            | chrX:98149720-98323215    | 1.4179   | 1.7055   | 0.2664  | 0.046365 |
| N6amt2        | chr14:57549597-57571569   | 24.1373  | 20.4379  | -0.2400 | 0.124371 |
| Qpct          | chr17:79051905-79090243   | 3.4611   | 2.7342   | -0.3401 | 0.058278 |
| Agfg2         | chr5:137650482-137684726  | 10.9251  | 9.7186   | -0.1688 | 0.112272 |
| Gnl3l         | chrX:150983140-151017322  | 17.8511  | 16.3168  | -0.1297 | 0.091485 |
| Dgcr2         | chr16:17839481-17894145   | 21.6918  | 19.9654  | -0.1196 | 0.123292 |
| Tgs1          | chr4:3574874-3616619      | 6.0265   | 6.8845   | 0.1920  | 0.027443 |
| Kdm1a         | chr4:136550539-136602723  | 25.6120  | 23.7127  | -0.1112 | 0.095372 |
| Egln2         | chr7:27158657-27166802    | 29.9250  | 27.0950  | -0.1433 | 0.125496 |
| Mfge8         | chr7:79133768-79149060    | 10.6665  | 9.3274   | -0.1935 | 0.079638 |
| Nudt18        | chr14:70577846-70582571   | 1.9715   | 2.5155   | 0.3516  | 0.088392 |
| Gba           | chr3:89202927-89208681    | 40.5124  | 37.2404  | -0.1215 | 0.069175 |
| Msl1          | chr11:98795515-98807859   | 25.9291  | 23.8406  | -0.1211 | 0.109130 |
| Lztr1         | chr16:17508687-17526333   | 19.3300  | 18.1032  | -0.0946 | 0.036869 |
| Cenpf         | chr1:189640598-189688086  | 0.6043   | 1.0472   | 0.7932  | 0.127509 |
| Ip6k1         | chr9:108002500-108048780  | 48.2170  | 44.5402  | -0.1144 | 0.167187 |
| Hist1h1e      | chr13:23621754-23622502   | 126.9667 | 158.8803 | 0.3235  | 0.208301 |
| Endod1        | chr9:14353989-14381242    | 4.5569   | 7.6960   | 0.7561  | 0.138742 |
| Txn14b        | chr8:109565891-109574051  | 6.5560   | 5.5057   | -0.2519 | 0.053508 |
| Ndc80         | chr17:71496099-71526857   | 5.0782   | 6.4296   | 0.3404  | 0.144657 |
| Rab6b         | chr9:103112073-103185270  | 6.3021   | 7.7707   | 0.3022  | 0.141999 |
| Adsl          | chr15:80948489-80970947   | 21.7030  | 19.5797  | -0.1485 | 0.107734 |
| Clk3          | chr9:57750710-57765860    | 45.2861  | 41.9931  | -0.1089 | 0.075135 |
| Arhgap5       | chr12:52516076-52567852   | 14.9298  | 17.3409  | 0.2160  | 0.129993 |
| Txnrd1        | chr10:82859205-82897724   | 17.9323  | 16.1871  | -0.1477 | 0.132304 |
| Sjfn8         | chr11:83002157-83020810   | 51.2025  | 59.8145  | 0.2243  | 0.147092 |
| Gm20692       | chr6:120512448-120513232  | 5.8543   | 8.2569   | 0.4961  | 0.139621 |
| 9130221H12Rik | chr7:25228686-25230257    | 40.6719  | 37.3172  | -0.1242 | 0.057258 |
| Unc45a        | chr7:80325291-80341005    | 16.4911  | 15.2466  | -0.1132 | 0.052357 |
| Trp53         | chr11:69580358-69591873   | 12.1274  | 14.5019  | 0.2580  | 0.127280 |
| Pepd          | chr7:34912378-35044710    | 15.7500  | 13.8980  | -0.1805 | 0.150608 |
| Apex2         | chrX:150519518-150589868  | 1.8988   | 2.2514   | 0.2457  | 0.072611 |
| Arhgef4       | chr1:34678187-34813309    | 4.7313   | 4.2794   | -0.1448 | 0.094511 |
| Cd151         | chr7:141467361-141471479  | 11.6112  | 10.2535  | -0.1794 | 0.067151 |
| Rplp0         | chr5:115559466-115563727  | 664.7438 | 566.2887 | -0.2313 | 0.206736 |
| Gale          | chr4:135963726-135968178  | 5.0175   | 4.2650   | -0.2344 | 0.055415 |
| Ipcef1        | chr10:6885795-7052478     | 39.6611  | 43.4269  | 0.1309  | 0.027955 |
| Mrpl14        | chr17:45686321-45698495   | 7.4918   | 5.9067   | -0.3430 | 0.091869 |
| Sh3bgrl       | chrX:109095364-109197873  | 11.1352  | 13.2446  | 0.2503  | 0.155575 |
| Zhx2          | chr15:57694664-57839833   | 11.1747  | 13.0639  | 0.2253  | 0.129262 |
| Gnb1          | chr4:155491360-155559269  | 32.5197  | 37.2797  | 0.1971  | 0.079906 |
| Bzrap1        | chr11:87760540-87785928   | 0.8048   | 1.1036   | 0.4556  | 0.225915 |
| Zfp324        | chr7:12965837-12974236    | 5.9838   | 5.3968   | -0.1489 | 0.021663 |
| Cirbp         | chr10:80165984-80172786   | 37.4038  | 43.9802  | 0.2337  | 0.118460 |
| Mrps30        | chr13:118380109-118387252 | 30.1979  | 26.8158  | -0.1714 | 0.099262 |
| Dcun1d4       | chr5:73481001-73560794    | 2.2028   | 2.6845   | 0.2853  | 0.097479 |
| Usp28         | chr9:48985384-49042517    | 22.1662  | 25.9578  | 0.2278  | 0.146981 |
| Ticam1        | chr17:56269318-56276786   | 3.5235   | 4.3391   | 0.3004  | 0.101507 |
| Kdm4b         | chr17:56326061-56402870   | 18.5815  | 17.0391  | -0.1250 | 0.124916 |
| Tgjf1         | chr17:70844204-70853546   | 6.0111   | 7.2582   | 0.2720  | 0.126245 |
| B3gnt1        | chr19:5038825-5041134     | 6.1404   | 5.2872   | -0.2158 | 0.018724 |
| Lbr           | chr1:181815315-181842401  | 130.4085 | 121.1886 | -0.1058 | 0.094756 |
| Set           | chr2:30057377-30072577    | 17.8503  | 16.2228  | -0.1379 | 0.092596 |
| Slc25a44      | chr3:88410497-88425139    | 14.9629  | 13.5657  | -0.1414 | 0.063240 |
| Tpm3          | chr3:90072648-90100902    | 49.3572  | 45.3743  | -0.1214 | 0.115040 |
| Ptk2b         | chr14:66153256-66281052   | 29.1800  | 32.3138  | 0.1472  | 0.063619 |
| Mdc1          | chr17:35841514-35859670   | 9.2011   | 11.0170  | 0.2599  | 0.195119 |
| Ptprj         | chr2:90429753-90580647    | 1.0076   | 1.8557   | 0.8811  | 0.126489 |
| Enpp1         | chr10:24637913-24712159   | 1.6460   | 1.9737   | 0.2620  | 0.112598 |
| Gnb2l1        | chr11:48800331-48806434   | 438.3479 | 383.1287 | -0.1942 | 0.185743 |
| Rnft1         | chr11:86484656-86499025   | 11.0893  | 12.4085  | 0.1622  | 0.022285 |
| Pigh          | chr12:79080672-79089670   | 13.0454  | 11.6807  | -0.1594 | 0.056832 |
| Serpina3g     | chr12:104236244-104241939 | 2.9594   | 6.9178   | 1.2250  | 0.205516 |
| Slc25a29      | chr12:108825872-108835883 | 3.1892   | 2.6219   | -0.2826 | 0.046895 |
| Ipo11         | chr13:106794438-106936915 | 12.8952  | 11.7734  | -0.1313 | 0.046122 |
| Ptpn13        | chr5:103425191-103598359  | 2.4915   | 4.9898   | 1.0020  | 0.163900 |
| Mlxip         | chr5:123394797-123457932  | 6.6454   | 7.9579   | 0.2600  | 0.191124 |
| Alkbh4        | chr5:136136145-136141615  | 30.6685  | 28.0867  | -0.1269 | 0.063645 |
| Creb3l2       | chr6:37327254-37442146    | 0.6419   | 0.8688   | 0.4367  | 0.121727 |
| Zfp772        | chr7:7202121-7209998      | 2.5115   | 2.0308   | -0.3065 | 0.045868 |
| Il16          | chr7:83642847-83745726    | 119.0226 | 111.2359 | -0.0976 | 0.100427 |

|                      |                           |          |          |         |          |
|----------------------|---------------------------|----------|----------|---------|----------|
| <i>Itpril2</i>       | chr7:118485113-118491975  | 0.4861   | 0.8189   | 0.7523  | 0.255824 |
| <i>Tenm1</i>         | chrX:42527865-43429126    | 0.2322   | 0.3095   | 0.4147  | 0.061287 |
| <i>Mbtps2</i>        | chrX:157535370-157598715  | 2.7634   | 3.2544   | 0.2359  | 0.118666 |
| <i>Sbf1</i>          | chr15:89288235-89315311   | 71.9208  | 65.4799  | -0.1354 | 0.195644 |
| <i>Ermard</i>        | chr17:15041640-15064232   | 6.3779   | 5.6038   | -0.1867 | 0.025380 |
| <i>Tjap4</i>         | chr16:4544660-4559720     | 9.2434   | 7.9310   | -0.2209 | 0.127117 |
| <i>Gm16726</i>       | chr19:46264538-46267669   | 6.5039   | 8.1741   | 0.3297  | 0.019484 |
| <i>4930523C07Rik</i> | chr1:160044383-160078428  | 54.6053  | 51.5670  | -0.0826 | 0.050130 |
| <i>Elac1</i>         | chr18:73735037-73754479   | 4.0821   | 4.8208   | 0.2400  | 0.062433 |
| <i>Nfatc2</i>        | chr2:168476409-168601657  | 3.8153   | 4.7949   | 0.3297  | 0.240616 |
| <i>Dclre1a</i>       | chr19:56529160-56548222   | 1.2206   | 1.4930   | 0.2906  | 0.019592 |
| <i>Slc22a15</i>      | chr3:101858953-101924453  | 0.4342   | 0.7961   | 0.8748  | 0.163213 |
| <i>Ccr4</i>          | chr9:114490315-114496544  | 3.5361   | 4.5988   | 0.3791  | 0.173473 |
| <i>Odf2l</i>         | chr3:145118588-145153915  | 2.9395   | 3.5825   | 0.2854  | 0.006698 |
| <i>Nme1</i>          | chr11:93956978-93968521   | 23.1325  | 19.8190  | -0.2230 | 0.196978 |
| <i>Lrrc39</i>        | chr3:116562972-116583134  | 4.0268   | 4.6322   | 0.2021  | 0.012539 |
| <i>Gclc</i>          | chr9:77754534-77794485    | 22.6921  | 21.0730  | -0.1068 | 0.025941 |
| <i>Rhob</i>          | chr12:8497762-8499985     | 4.1256   | 5.8487   | 0.5035  | 0.162847 |
| <i>Leprotl1</i>      | chr8:34135571-34147033    | 84.6393  | 78.5088  | -0.1085 | 0.080524 |
| <i>Tmem126a</i>      | chr7:90450699-90457229    | 27.7981  | 31.7911  | 0.1936  | 0.022391 |
| <i>Rgs16</i>         | chr1:153740348-153745468  | 2.4175   | 5.5125   | 1.1892  | 0.202479 |
| <i>Tnfrsf4</i>       | chr4:156013842-156016612  | 13.5680  | 22.4989  | 0.7296  | 0.149053 |
| <i>Gm26636</i>       | chr6:87908842-87914459    | 20.3061  | 17.7752  | -0.1921 | 0.118837 |
| <i>Tpgs1</i>         | chr10:79669409-79676126   | 14.7762  | 12.6920  | -0.2194 | 0.079007 |
| <i>Dntt</i>          | chr19:41029274-41059523   | 9.9387   | 7.8419   | -0.3419 | 0.212989 |
| <i>Atp5b</i>         | chr10:128083272-128090391 | 172.0662 | 157.0454 | -0.1318 | 0.130140 |
| <i>Sh3bp5l</i>       | chr11:58330723-58347728   | 5.8184   | 5.3133   | -0.1310 | 0.020615 |
| <i>Crebbp</i>        | chr16:4084047-4213404     | 24.0690  | 28.7919  | 0.2585  | 0.224949 |
| <i>Ptpv</i>          | chr1:135108496-135132594  | 1.2648   | 1.6538   | 0.3869  | 0.175318 |
| <i>Ethe1</i>         | chr7:24587542-24608925    | 7.6161   | 6.2893   | -0.2762 | 0.107962 |
| <i>D16Ertd472e</i>   | chr16:78544011-78576657   | 27.4426  | 25.3788  | -0.1128 | 0.017363 |
| <i>Osbp</i>          | chr19:11965843-11994105   | 29.4788  | 27.6189  | -0.0940 | 0.055461 |
| <i>Myo1e</i>         | chr9:70207349-70400067    | 0.8985   | 1.6951   | 0.9157  | 0.124827 |
| <i>Akap9</i>         | chr5:3928053-4080209      | 17.1456  | 18.9612  | 0.1452  | 0.048093 |
| <i>Mecp2</i>         | chrX:74026591-74135363    | 8.3615   | 9.4930   | 0.1831  | 0.099302 |
| <i>Cyba</i>          | chr8:122424771-122432940  | 170.4196 | 152.1608 | -0.1635 | 0.168995 |
| <i>Suds3</i>         | chr5:117091681-117115993  | 45.9075  | 41.4992  | -0.1456 | 0.123452 |
| <i>D15Ertd621e</i>   | chr15:58415467-58457801   | 17.3895  | 19.4622  | 0.1625  | 0.068922 |
| <i>Tpra1</i>         | chr6:88902250-88912238    | 19.4620  | 17.7819  | -0.1302 | 0.099303 |
| <i>Glce</i>          | chr9:62057247-62070606    | 8.3746   | 7.6439   | -0.1317 | 0.040498 |
| <i>Braf</i>          | chr6:39603236-39725463    | 5.3645   | 6.1191   | 0.1899  | 0.113672 |
| <i>Zfp64</i>         | chr2:168893330-168955587  | 6.5377   | 5.7957   | -0.1738 | 0.140915 |
| <i>lft27</i>         | chr15:78159464-78174108   | 12.9330  | 10.9330  | -0.2424 | 0.079811 |
| <i>Snord2</i>        | chr16:23108952-23109021   | 105.5223 | 130.4207 | 0.3056  | 0.027203 |
| <i>Kif5c</i>         | chr2:49619297-49774778    | 0.8864   | 1.3099   | 0.5634  | 0.229012 |
| <i>Plek</i>          | chr11:16971205-17052381   | 1.9151   | 3.1745   | 0.7291  | 0.139645 |
| <i>Psme2b</i>        | chr11:4894353-48946190    | 30.4658  | 34.6425  | 0.1854  | 0.008862 |
| <i>2810021J22Rik</i> | chr11:58867215-58883288   | 6.5661   | 7.4783   | 0.1877  | 0.008269 |
| <i>Nudt14</i>        | chr12:112934732-112942118 | 19.0129  | 15.9643  | -0.2521 | 0.138844 |
| <i>Caml</i>          | chr13:55623004-55632411   | 18.2256  | 16.2870  | -0.1623 | 0.071201 |
| <i>Rbpj</i>          | chr5:53555778-53657445    | 3.7925   | 4.5793   | 0.2720  | 0.148269 |
| <i>Rnf34</i>         | chr5:122850187-122868945  | 32.4046  | 29.3979  | -0.1405 | 0.085804 |
| <i>Kdm2b</i>         | chr5:122870667-123015080  | 3.9991   | 4.5558   | 0.1880  | 0.080483 |
| <i>Bhlha15</i>       | chr5:144190285-144194441  | 1.3695   | 1.8151   | 0.4064  | 0.118635 |
| <i>Paip2b</i>        | chr6:83805400-83831741    | 10.5642  | 9.6401   | -0.1321 | 0.066416 |
| <i>Kmt2b</i>         | chr7:30568857-30588726    | 9.4637   | 11.6560  | 0.3006  | 0.243572 |
| <i>Ngrn</i>          | chr7:80261214-80265374    | 25.3916  | 22.7821  | -0.1564 | 0.085445 |
| <i>Cpne7</i>         | chr8:123117373-123135182  | 0.3785   | 1.3473   | 1.8319  | 0.133900 |
| <i>Tspan3</i>        | chr9:56135884-56161070    | 8.9482   | 10.8167  | 0.2736  | 0.135469 |
| <i>Atp11c</i>        | chrX:60223289-60592698    | 17.2115  | 19.0412  | 0.1457  | 0.042676 |
| <i>Zfp707</i>        | chr15:75969122-75975868   | 9.3936   | 8.4141   | -0.1589 | 0.057721 |
| <i>Gm20463</i>       | chr17:34601150-34601576   | 12.4288  | 16.2915  | 0.3904  | 0.045897 |
| <i>Uhrf1</i>         | chr17:56303320-56323486   | 2.0165   | 2.6009   | 0.3672  | 0.169439 |
| <i>Cd200r4</i>       | chr16:44811732-44839150   | 4.3662   | 3.5303   | -0.3066 | 0.131653 |
| <i>Minpp1</i>        | chr19:32485768-32515370   | 20.5092  | 18.3565  | -0.1600 | 0.119854 |
| <i>Dnlz</i>          | chr2:26348120-26352110    | 12.4799  | 11.2635  | -0.1480 | 0.060134 |
| <i>2610002J02Rik</i> | chr4:155249801-155256687  | 22.7445  | 20.3402  | -0.1612 | 0.100370 |
| <i>Atad3a</i>        | chr4:155740640-155761093  | 15.3101  | 13.7452  | -0.1556 | 0.149581 |
| <i>Sipa1l3</i>       | chr7:29320371-29518641    | 1.1317   | 1.4107   | 0.3179  | 0.171121 |
| <i>Marcks</i>        | chr10:37133374-37138920   | 1.3853   | 1.8307   | 0.4022  | 0.118564 |
| <i>Susd2</i>         | chr10:75636618-75644008   | 1.0693   | 1.5782   | 0.5615  | 0.206714 |

|                      |                           |           |           |         |          |
|----------------------|---------------------------|-----------|-----------|---------|----------|
| <i>Pebp1</i>         | chr5:117282650-117287625  | 12.4231   | 10.7858   | -0.2039 | 0.121710 |
| <i>Gm26762</i>       | chr7:34224754-34230236    | 7.6342    | 8.7539    | 0.1974  | 0.065021 |
| <i>Tex9</i>          | chr9:72458054-72491959    | 3.8499    | 3.2235    | -0.2562 | 0.160285 |
| <i>Gm10615</i>       | chr9:110117702-110119916  | 5.3126    | 4.2550    | -0.3203 | 0.166019 |
| <i>NA</i>            | chr15:78913918-78919517   | 10.7320   | 9.4574    | -0.1824 | 0.065495 |
| <i>Alcam</i>         | chr16:52248995-52454074   | 1.0946    | 1.8329    | 0.7437  | 0.170531 |
| <i>Gm26667</i>       | chr16:84713022-84715242   | 3.7499    | 5.0704    | 0.4352  | 0.154039 |
| <i>NA</i>            | chr1:160044583-160071509  | 112.8942  | 102.5455  | -0.1387 | 0.070793 |
| <i>Naa15</i>         | chr3:51416015-51475985    | 15.9190   | 18.0182   | 0.1787  | 0.106429 |
| <i>Ncbp1</i>         | chr4:46138612-46172403    | 44.5454   | 41.6894   | -0.0956 | 0.043885 |
| <i>Gm9939</i>        | chr8:34965051-34966209    | 6.8747    | 5.3030    | -0.3745 | 0.166208 |
| <i>Skap2</i>         | chr6:51859165-52012549    | 5.5367    | 6.9662    | 0.3313  | 0.144540 |
| <i>Cstf2t</i>        | chr19:31082840-31086590   | 38.6432   | 35.8743   | -0.1073 | 0.065755 |
| <i>Prpsap1</i>       | chr11:116470844-116494202 | 15.5782   | 14.0116   | -0.1529 | 0.099477 |
| <i>Atraid</i>        | chr5:31048311-31054633    | 18.2703   | 16.5362   | -0.1439 | 0.074476 |
| <i>Pgm1</i>          | chr5:64092935-64128355    | 7.5368    | 8.8882    | 0.2379  | 0.075661 |
| <i>Me2</i>           | chr18:73770039-73815392   | 69.5654   | 62.5859   | -0.1525 | 0.144538 |
| <i>Ulk3</i>          | chr9:57589451-57596233    | 6.0124    | 7.3847    | 0.2966  | 0.154603 |
| <i>Gm26720</i>       | chr1:91989050-91992628    | 2.5234    | 3.0656    | 0.2808  | 0.036751 |
| <i>Ddx50</i>         | chr10:62616022-62651218   | 35.1446   | 39.2761   | 0.1604  | 0.045304 |
| <i>Nom1</i>          | chr5:29434663-29453506    | 15.1494   | 14.0325   | -0.1105 | 0.030089 |
| <i>Qsox2</i>         | chr2:26208636-26237525    | 5.5036    | 4.9302    | -0.1587 | 0.022226 |
| <i>Gm16973</i>       | chr14:56696279-56701268   | 8.2678    | 9.6382    | 0.2213  | 0.043630 |
| <i>Zfp3</i>          | chr11:70764208-70772928   | 7.1371    | 6.0765    | -0.2321 | 0.105230 |
| <i>1500011B03Rik</i> | chr5:114808195-114813976  | 15.4569   | 13.5718   | -0.1876 | 0.087806 |
| <i>Ino80b</i>        | chr6:83121764-83125431    | 16.3458   | 14.5872   | -0.1642 | 0.051091 |
| <i>Vwa9</i>          | chr9:64960831-64986974    | 15.7875   | 14.2582   | -0.1470 | 0.084793 |
| <i>Prkag1</i>        | chr15:98812797-98831508   | 83.2895   | 77.0885   | -0.1116 | 0.089306 |
| <i>Ccnj</i>          | chr19:40831278-40848572   | 3.6579    | 4.2986    | 0.2329  | 0.038975 |
| <i>Nrip3</i>         | chr7:109758054-109782025  | 1.4497    | 1.8279    | 0.3344  | 0.029878 |
| <i>Cbl</i>           | chr9:44149261-44234046    | 20.1258   | 23.6706   | 0.2341  | 0.203182 |
| <i>Ireb2</i>         | chr9:54863754-54912534    | 9.6412    | 11.0306   | 0.1942  | 0.111701 |
| <i>Fasl</i>          | chr1:161780690-161788495  | 7.8824    | 9.3013    | 0.2388  | 0.053263 |
| <i>Spen</i>          | chr4:141467889-141538597  | 3.7222    | 4.6075    | 0.3078  | 0.248500 |
| <i>Msl3</i>          | chrX:168654116-168673898  | 22.8013   | 20.7467   | -0.1362 | 0.082950 |
| <i>Trappc5</i>       | chr8:3676298-3681255      | 16.0605   | 14.6075   | -0.1368 | 0.055544 |
| <i>Zfp846</i>        | chr9:20581324-20595194    | 8.7373    | 7.6139    | -0.1985 | 0.129088 |
| <i>Gm608</i>         | chr16:44173245-44227465   | 6.2750    | 7.4154    | 0.2409  | 0.195486 |
| <i>Kbtbd11</i>       | chr8:15011024-15033330    | 170.4570  | 157.8779  | -0.1106 | 0.169657 |
| <i>Dpp3</i>          | chr19:4907228-4928287     | 33.3750   | 30.9742   | -0.1077 | 0.093024 |
| <i>Npm3</i>          | chr19:45747733-45749591   | 21.3447   | 18.5403   | -0.2032 | 0.125162 |
| <i>Slc2a1</i>        | chr4:119108710-119137330  | 13.9846   | 12.6719   | -0.1422 | 0.099062 |
| <i>Vmp1</i>          | chr11:86583864-86683836   | 23.0491   | 33.6445   | 0.5457  | 0.144485 |
| <i>Ddx41</i>         | chr13:55530409-55536658   | 36.4105   | 33.8192   | -0.1065 | 0.030873 |
| <i>Egfl8</i>         | chr17:34613348-34615971   | 2.5397    | 3.2465    | 0.3542  | 0.006629 |
| <i>Gm12057</i>       | chr11:22758593-22859544   | 3.3075    | 2.5445    | -0.3784 | 0.152205 |
| <i>Enpp5</i>         | chr17:44078812-44086567   | 3.6296    | 3.1364    | -0.2107 | 0.097777 |
| <i>A630023P12Rik</i> | chr5:110514922-110525980  | 25.0931   | 30.2460   | 0.2694  | 0.174676 |
| <i>Fam134c</i>       | chr11:101096321-101119893 | 53.8565   | 50.1009   | -0.1043 | 0.132720 |
| <i>Cask</i>          | chrX:13517079-13851367    | 0.3717    | 0.5235    | 0.4939  | 0.141573 |
| <i>Wrap73</i>        | chr4:154142371-154167420  | 9.2835    | 8.4206    | -0.1407 | 0.083489 |
| <i>Trim17</i>        | chr11:58954684-58973098   | 12.8573   | 11.2758   | -0.1894 | 0.156293 |
| <i>Prps1l3</i>       | chr12:57230411-57239882   | 43.0418   | 39.0662   | -0.1398 | 0.099659 |
| <i>5430403G16Rik</i> | chr5:109674544-109691041  | 5.6831    | 6.5758    | 0.2105  | 0.024211 |
| <i>Pdp2</i>          | chr8:104591467-104596836  | 10.0182   | 9.0986    | -0.1389 | 0.038114 |
| <i>Gm10863</i>       | chr15:79166040-79227524   | 5.7581    | 4.5983    | -0.3245 | 0.197160 |
| <i>Srfbp1</i>        | chr18:52465692-52490738   | 27.8361   | 25.3052   | -0.1375 | 0.037644 |
| <i>Ppp2r4</i>        | chr2:30416038-30447806    | 19.3483   | 18.0921   | -0.0968 | 0.020704 |
| <i>Sdha</i>          | chr13:74322253-74350280   | 62.5516   | 69.2604   | 0.1470  | 0.048812 |
| <i>Coq5</i>          | chr5:115279665-115296972  | 17.9902   | 16.2765   | -0.1444 | 0.062582 |
| <i>Zfp90</i>         | chr8:106415338-106425889  | 5.0522    | 5.9232    | 0.2295  | 0.006808 |
| <i>Prf1</i>          | chr10:61297835-61304263   | 22.0782   | 19.7474   | -0.1610 | 0.150143 |
| <i>Qsox1</i>         | chr1:155778154-155812883  | 9.0945    | 8.3483    | -0.1235 | 0.093596 |
| <i>Ica1l</i>         | chr1:59989069-60043087    | 1.1783    | 1.5985    | 0.4400  | 0.101453 |
| <i>Fastk</i>         | chr5:24438439-24445287    | 21.2586   | 19.4803   | -0.1260 | 0.132631 |
| <i>Cmtm7</i>         | chr9:114756836-114781993  | 38.1528   | 33.9907   | -0.1667 | 0.109472 |
| <i>1700016P03Rik</i> | chr11:75172559-75177633   | 12.8990   | 10.9816   | -0.2322 | 0.021966 |
| <i>Mast4</i>         | chr13:102732485-103334497 | 0.5855    | 0.7324    | 0.3228  | 0.188007 |
| <i>Fam126a</i>       | chr5:23915275-24030690    | 5.3065    | 6.1064    | 0.2026  | 0.106106 |
| <i>NA</i>            | chr5:146261002-146261084  | 1892.3539 | 3195.5589 | 0.7559  | 0.192020 |
| <i>Fbxo46</i>        | chr7:19119858-19138261    | 14.4167   | 13.0415   | -0.1446 | 0.133323 |

|                      |                           |          |          |         |          |
|----------------------|---------------------------|----------|----------|---------|----------|
| <i>Snrnp70</i>       | chr7:45376461-45395692    | 204.6825 | 191.5884 | -0.0954 | 0.102762 |
| <i>Edc4</i>          | chr8:105880880-105894908  | 24.2116  | 22.3990  | -0.1123 | 0.157930 |
| <i>Abhd16a</i>       | chr17:35089262-35102987   | 16.7416  | 15.4572  | -0.1152 | 0.061658 |
| <i>Dnajc28</i>       | chr16:91614256-91619026   | 2.7702   | 2.3512   | -0.2366 | 0.011746 |
| <i>Atp2b4</i>        | chr1:133702673-133801041  | 1.0668   | 2.0520   | 0.9438  | 0.132320 |
| <i>Ppic</i>          | chr18:53406340-53418007   | 3.1416   | 4.4908   | 0.5155  | 0.148370 |
| <i>Ect2</i>          | chr3:27097221-27153878    | 1.3447   | 1.7087   | 0.3456  | 0.116714 |
| <i>Mier1</i>         | chr4:103114389-103165754  | 16.3187  | 18.0329  | 0.1441  | 0.048653 |
| <i>Zbtb8a</i>        | chr4:129353627-129378116  | 4.7697   | 4.0796   | -0.2255 | 0.029740 |
| <i>Nudc</i>          | chr4:133532541-133545996  | 30.2253  | 26.9364  | -0.1662 | 0.126244 |
| <i>Zdhhc18</i>       | chr4:133605298-133650154  | 42.0578  | 38.6761  | -0.1209 | 0.181635 |
| <i>Cradd</i>         | chr10:95174745-95324097   | 2.2376   | 2.9259   | 0.3869  | 0.011875 |
| <i>Dcaf7</i>         | chr11:106036871-106059324 | 38.3852  | 36.1365  | -0.0871 | 0.075759 |
| <i>Erlin1</i>        | chr19:44034943-44069785   | 1.5879   | 1.9607   | 0.3042  | 0.035055 |
| <i>Acaa2</i>         | chr18:74779196-74806207   | 41.2415  | 36.3557  | -0.1819 | 0.153589 |
| <i>Prc1</i>          | chr7:80294449-80316259    | 1.9021   | 2.4594   | 0.3707  | 0.209120 |
| <i>Mcu</i>           | chr10:59446983-59616692   | 4.4524   | 5.0639   | 0.1856  | 0.035057 |
| <i>Cnot8</i>         | chr11:58104152-58118594   | 29.6551  | 27.0846  | -0.1308 | 0.100997 |
| <i>Zfp361</i>        | chr12:80107759-80113013   | 22.3883  | 26.3951  | 0.2375  | 0.151098 |
| <i>Tamm41</i>        | chr6:115004380-115037876  | 3.0005   | 2.5795   | -0.2181 | 0.110257 |
| <i>Lag3</i>          | chr6:124904360-124911705  | 2.2653   | 5.7780   | 1.3509  | 0.172198 |
| <i>Star</i>          | chr8:25808473-25814723    | 3.9403   | 4.8314   | 0.2941  | 0.116871 |
| <i>Wwox</i>          | chr8:114439654-115352708  | 1.2569   | 1.4774   | 0.2332  | 0.015966 |
| <i>Zfp251</i>        | chr15:76852147-76871435   | 18.6010  | 17.2107  | -0.1121 | 0.043331 |
| <i>Gm28047</i>       | chr15:102536653-102625421 | 4.5050   | 5.4920   | 0.2858  | 0.119295 |
| <i>Bach1</i>         | chr16:87698944-87733346   | 11.1215  | 10.2268  | -0.1210 | 0.069470 |
| <i>Egr1</i>          | chr18:34859822-34864984   | 3.2907   | 4.1900   | 0.3486  | 0.209905 |
| <i>Slc2a4rg-ps</i>   | chr2:181384249-181387586  | 54.5239  | 48.0012  | -0.1838 | 0.225220 |
| <i>Psip1</i>         | chr4:83455679-83486459    | 56.9675  | 63.1076  | 0.1477  | 0.056194 |
| <i>Rps6ka1</i>       | chr4:133847289-133887797  | 60.1183  | 56.8865  | -0.0797 | 0.084692 |
| <i>Cep83</i>         | chr10:94688789-94790336   | 14.8108  | 17.0986  | 0.2072  | 0.104273 |
| <i>Nbr1</i>          | chr11:101552148-101581951 | 34.1241  | 32.1245  | -0.0871 | 0.104303 |
| <i>Gm15283</i>       | chr12:73926480-73949785   | 21.9714  | 27.2803  | 0.3122  | 0.234512 |
| <i>Lysmd3</i>        | chr13:81657805-81671888   | 24.7644  | 21.7841  | -0.1850 | 0.174345 |
| <i>Gsap</i>          | chr5:21186266-21291701    | 6.3974   | 7.5942   | 0.2474  | 0.134073 |
| <i>Maea</i>          | chr5:33335571-33373294    | 35.2313  | 32.7431  | -0.1057 | 0.036339 |
| <i>Irak1</i>         | chrX:74013913-74023918    | 19.7353  | 22.1731  | 0.1680  | 0.100449 |
| <i>Las1</i>          | chrX:95935334-95956962    | 6.4547   | 7.4547   | 0.2078  | 0.126023 |
| <i>Rpap3</i>         | chr15:97675104-97705822   | 14.6792  | 13.1696  | -0.1566 | 0.096679 |
| <i>Kcnh3</i>         | chr15:99224975-99242817   | 1.6611   | 1.2116   | -0.4552 | 0.211617 |
| <i>Appl1</i>         | chr14:26918987-26971232   | 12.0356  | 13.1675  | 0.1297  | 0.013501 |
| <i>Sac3d1</i>        | chr19:6116003-6118586     | 6.8387   | 5.6084   | -0.2861 | 0.102583 |
| <i>Entpd1</i>        | chr19:40612365-40741602   | 0.8180   | 1.6773   | 1.0359  | 0.153206 |
| <i>Fam129a</i>       | chr1:151571185-151721939  | 3.6777   | 5.9499   | 0.6941  | 0.150836 |
| <i>Sdr4ze1</i>       | chr8:117661398-117673689  | 1.8013   | 1.4453   | -0.3177 | 0.007317 |
| <i>Myb</i>           | chr10:21124929-21160984   | 20.3029  | 23.9368  | 0.2375  | 0.143587 |
| <i>Cmas</i>          | chr6:142756685-142775714  | 30.4439  | 28.3180  | -0.1044 | 0.076053 |
| <i>G630030J09Rik</i> | chr7:31149527-31152707    | 9.3915   | 7.9351   | -0.2431 | 0.173929 |
| <i>Nipa2</i>         | chr7:55931286-55962476    | 8.8426   | 8.0236   | -0.1402 | 0.078982 |
| <i>St5</i>           | chr7:109523910-109617147  | 2.4810   | 2.1388   | -0.2142 | 0.006573 |
| <i>Idh3g</i>         | chrX:73778962-73786897    | 43.5865  | 39.8960  | -0.1276 | 0.152941 |
| <i>Ighmbp2</i>       | chr19:3260923-3283017     | 8.0494   | 7.2157   | -0.1577 | 0.128031 |
| <i>Klf6</i>          | chr13:5861488-5870393     | 66.8889  | 78.0064  | 0.2218  | 0.165352 |
| <i>Gm2a</i>          | chr11:55098114-55113029   | 30.1890  | 34.8458  | 0.2070  | 0.112813 |
| <i>Ndufa10</i>       | chr1:92439009-92473860    | 46.6494  | 41.8225  | -0.1576 | 0.161065 |
| <i>Nucb2</i>         | chr7:116504368-116540554  | 1.9316   | 2.6491   | 0.4557  | 0.115999 |
| <i>Sugp1</i>         | chr8:70042812-70071953    | 20.8632  | 24.5306  | 0.2336  | 0.140436 |
| <i>Ovca2</i>         | chr11:75175941-75178835   | 18.6617  | 17.0659  | -0.1290 | 0.062136 |
| <i>Iah1</i>          | chr12:21316391-21323605   | 23.3191  | 20.6781  | -0.1734 | 0.050742 |
| <i>Zfp710</i>        | chr7:80024813-80092751    | 11.8882  | 10.8337  | -0.1340 | 0.130711 |
| <i>Akr1c12</i>       | chr13:4268171-4279433     | 4.9168   | 3.8603   | -0.3490 | 0.109522 |
| <i>Spint2</i>        | chr7:29256330-29281977    | 27.5207  | 33.0974  | 0.2662  | 0.130408 |
| <i>Prkrir</i>        | chr7:98703102-98718062    | 38.2132  | 34.9446  | -0.1290 | 0.144180 |
| <i>Drap1</i>         | chr19:5422804-5424979     | 52.6052  | 45.6782  | -0.2037 | 0.202915 |
| <i>Dusp10</i>        | chr1:184013301-184075636  | 39.7359  | 35.6181  | -0.1578 | 0.178117 |
| <i>Cicc1</i>         | chr3:108653912-108678840  | 14.6182  | 13.4239  | -0.1230 | 0.093304 |
| <i>Inadl</i>         | chr4:98395784-98719603    | 11.4402  | 10.6764  | -0.0997 | 0.131975 |
| <i>Srsf1</i>         | chr11:88047372-88053755   | 134.8928 | 124.4783 | -0.1159 | 0.166484 |
| <i>Tob2</i>          | chr15:81848269-81858326   | 13.7245  | 12.1856  | -0.1716 | 0.211944 |
| <i>St7l</i>          | chr3:104864502-104926860  | 6.9136   | 6.3531   | -0.1220 | 0.052108 |
| <i>Dynll2</i>        | chr11:87979524-87987533   | 3.6854   | 4.6340   | 0.3304  | 0.114126 |

|                      |                           |          |          |         |          |
|----------------------|---------------------------|----------|----------|---------|----------|
| <i>Mettl21a</i>      | chr1:64606472-64617242    | 9.6483   | 8.6263   | -0.1615 | 0.062557 |
| <i>Ell</i>           | chr8:70539674-70592858    | 10.7348  | 9.7063   | -0.1453 | 0.105172 |
| <i>Gen1</i>          | chr12:11240925-11265787   | 1.7819   | 2.2645   | 0.3458  | 0.091190 |
| <i>Fam168a</i>       | chr7:100706650-100841628  | 5.4216   | 6.3054   | 0.2178  | 0.125448 |
| <i>Zfp408</i>        | chr2:91643668-91649791    | 13.9392  | 12.8369  | -0.1189 | 0.055196 |
| <i>Sirt6</i>         | chr10:81621784-81627797   | 7.1068   | 6.1232   | -0.2149 | 0.155741 |
| <i>Med7</i>          | chr11:46436924-46442721   | 4.7133   | 5.5586   | 0.2380  | 0.038383 |
| <i>Edf1</i>          | chr2:25557846-25562082    | 55.4175  | 49.4503  | -0.1644 | 0.166615 |
| <i>Tbc1d30</i>       | chr10:121263823-121311189 | 3.2737   | 3.8279   | 0.2256  | 0.057268 |
| <i>Fastkd3</i>       | chr13:68582247-68592279   | 8.4778   | 7.5402   | -0.1691 | 0.035872 |
| <i>Pikfyve</i>       | chr1:65186749-65274012    | 21.1466  | 19.8501  | -0.0913 | 0.067742 |
| <i>Snord14d</i>      | chr9:40803994-40804080    | 111.6984 | 82.7229  | -0.4332 | 0.251617 |
| <i>Mesdc2</i>        | chr7:83884465-83901532    | 11.0493  | 10.2383  | -0.1100 | 0.017543 |
| <i>2010016118Rik</i> | chr3:106482012-106483437  | 115.7250 | 105.0980 | -0.1390 | 0.203628 |
| <i>Brat1</i>         | chr5:140705010-140719379  | 10.6638  | 9.8085   | -0.1206 | 0.121614 |
| <i>Zbtb43</i>        | chr2:33450286-33468559    | 12.0155  | 11.0757  | -0.1175 | 0.099257 |
| <i>Cars2</i>         | chr8:11514020-11550771    | 16.5151  | 14.8252  | -0.1557 | 0.087749 |
| <i>Dmap1</i>         | chr4:117674680-117682273  | 13.8540  | 12.6171  | -0.1349 | 0.044193 |
| <i>Sar1a</i>         | chr10:61680309-61693295   | 51.9412  | 48.1412  | -0.1096 | 0.113024 |
| <i>Rnf216</i>        | chr5:142990892-143113020  | 3.6429   | 4.6293   | 0.3457  | 0.216346 |
| <i>Fam96b</i>        | chr8:104639838-104641965  | 26.7711  | 23.7158  | -0.1748 | 0.089484 |
| <i>Cyhr1</i>         | chr15:76643394-76660117   | 14.3878  | 13.4806  | -0.0940 | 0.028457 |
| <i>Phb</i>           | chr11:95666956-95680773   | 5.6738   | 4.9653   | -0.1924 | 0.045442 |
| <i>Snx1</i>          | chr9:66088132-66126587    | 31.6267  | 29.3763  | -0.1065 | 0.086043 |
| <i>Rnf123</i>        | chr9:108051533-108083346  | 20.3006  | 23.1486  | 0.1894  | 0.157191 |
| <i>Alg1</i>          | chr16:5233620-5244912     | 16.3057  | 14.8241  | -0.1374 | 0.101507 |
| <i>Ubap1</i>         | chr4:41348995-41390525    | 15.4911  | 14.0486  | -0.1410 | 0.112230 |
| <i>Ccng1</i>         | chr11:40748551-40755311   | 89.0404  | 79.3261  | -0.1667 | 0.184521 |
| <i>Tatdn2</i>        | chr6:113697049-113711069  | 54.8109  | 51.5170  | -0.0894 | 0.083065 |
| <i>Gm17178</i>       | chr11:120689145-120709447 | 27.4589  | 23.3889  | -0.2314 | 0.025680 |
| <i>Supt7l</i>        | chr5:31514568-31527807    | 9.7876   | 8.7761   | -0.1574 | 0.146790 |
| <i>Arid4b</i>        | chr13:14063231-14199603   | 17.5139  | 19.7472  | 0.1731  | 0.118733 |
| <i>Usp3</i>          | chr9:66514636-66593142    | 42.2614  | 39.5215  | -0.0967 | 0.104942 |
| <i>Dffb</i>          | chr4:153964448-153975126  | 10.7106  | 9.5861   | -0.1600 | 0.055984 |
| <i>Ago2</i>          | chr15:73098591-73184840   | 11.4123  | 13.7312  | 0.2669  | 0.249604 |
| <i>Zc3h7b</i>        | chr15:81744847-81796269   | 4.2158   | 4.9988   | 0.2458  | 0.155498 |
| <i>Mroh2a</i>        | chr1:88226985-88262289    | 1.2263   | 1.5087   | 0.2990  | 0.085915 |
| <i>Mrps7</i>         | chr11:115603924-115608036 | 18.3400  | 16.7151  | -0.1338 | 0.042138 |
| <i>Phc1</i>          | chr6:122317730-122340561  | 2.6829   | 3.2778   | 0.2889  | 0.132183 |
| <i>Snora65</i>       | chr2:32963290-32963420    | 93.4887  | 79.6763  | -0.2306 | 0.062063 |
| <i>Fam101b</i>       | chr11:76019193-76027782   | 85.1474  | 78.3931  | -0.1192 | 0.160474 |
| <i>Naip2</i>         | chr13:100144062-100202092 | 2.1379   | 2.8669   | 0.4233  | 0.224626 |
| <i>Smarcc1</i>       | chr9:110132036-110240178  | 11.1817  | 12.9234  | 0.2089  | 0.126698 |
| <i>Snrpb</i>         | chr2:130171413-130179403  | 68.9065  | 63.2059  | -0.1246 | 0.123402 |
| <i>Aga</i>           | chr8:53511701-53523421    | 13.8581  | 12.1774  | -0.1865 | 0.081948 |
| <i>Tram2</i>         | chr1:20996295-21079229    | 0.9498   | 1.2052   | 0.3435  | 0.103814 |
| <i>Ints7</i>         | chr1:191575762-191622672  | 23.1553  | 21.6092  | -0.0997 | 0.079735 |
| <i>Msto1</i>         | chr3:88905106-88913999    | 10.6167  | 9.7568   | -0.1218 | 0.117018 |
| <i>Adipor2</i>       | chr6:119353149-119417483  | 44.2703  | 41.0019  | -0.1107 | 0.105073 |
| <i>Slc9a7</i>        | chrX:20105754-20291807    | 2.5483   | 3.4174   | 0.4234  | 0.211760 |
| <i>Brca1</i>         | chr11:101488763-101551955 | 1.3268   | 1.6515   | 0.3159  | 0.158841 |
| <i>Fbxo17</i>        | chr7:28716803-28738144    | 3.5693   | 4.6568   | 0.3837  | 0.149487 |
| <i>I830012016Rik</i> | chr19:34607969-34613401   | 3.5363   | 6.5722   | 0.8942  | 0.073227 |
| <i>2810408M09Rik</i> | chr2:165490109-165493324  | 9.3917   | 8.3609   | -0.1677 | 0.046014 |
| <i>Psmg1</i>         | chr16:95979932-95990960   | 18.1276  | 15.6837  | -0.2089 | 0.141289 |
| <i>Vamp1</i>         | chr6:125215550-125244543  | 14.9620  | 13.5435  | -0.1437 | 0.192674 |
| <i>Eomes</i>         | chr9:118478211-118486132  | 3.0985   | 4.9840   | 0.6858  | 0.100856 |
| <i>Sharpin</i>       | chr15:76347039-76351111   | 33.8928  | 31.4776  | -0.1067 | 0.114669 |
| <i>Prdx5</i>         | chr19:6906696-6910106     | 27.9037  | 24.7087  | -0.1754 | 0.158361 |
| <i>Gm15800</i>       | chr5:121220218-121368577  | 9.3578   | 11.2417  | 0.2646  | 0.247744 |
| <i>Gpn3</i>          | chr5:122371875-122382902  | 16.2632  | 14.5799  | -0.1576 | 0.141264 |
| <i>Pgs1</i>          | chr11:117986291-118024011 | 15.0035  | 13.9388  | -0.1062 | 0.060576 |
| <i>Mettl13</i>       | chr1:162532126-162548551  | 4.1631   | 3.7055   | -0.1680 | 0.136704 |
| <i>Gm26850</i>       | chr3:63963632-63968659    | 6.5641   | 5.7971   | -0.1793 | 0.051347 |
| <i>Gm26789</i>       | chr10:63292285-63295793   | 4.2937   | 5.4051   | 0.3321  | 0.177770 |
| <i>Hopx</i>          | chr5:77086442-77115161    | 3.1344   | 4.2161   | 0.4277  | 0.230049 |
| <i>Dusp11</i>        | chr6:85942267-85961667    | 28.8036  | 31.6706  | 0.1369  | 0.033057 |
| <i>Gnl1</i>          | chr17:35979850-35989462   | 30.1338  | 27.5914  | -0.1272 | 0.142619 |
| <i>Rbbp5</i>         | chr1:132477366-132505665  | 28.2563  | 26.5835  | -0.0880 | 0.037402 |
| <i>Il9r</i>          | chr11:32187540-32200279   | 1.4163   | 1.9633   | 0.4711  | 0.218140 |
| <i>Guk1</i>          | chr11:59183874-59192212   | 17.3831  | 15.5023  | -0.1652 | 0.117147 |

|                      |                           |          |          |         |          |
|----------------------|---------------------------|----------|----------|---------|----------|
| <i>Card6</i>         | chr15:5095980-5108539     | 5.9324   | 6.7673   | 0.1900  | 0.074234 |
| <i>Pik3cd</i>        | chr4:149649167-149702571  | 157.2210 | 148.5741 | -0.0816 | 0.132452 |
| <i>NA</i>            | chr5:105215698-105239533  | 3.7243   | 5.7678   | 0.6310  | 0.112187 |
| <i>Crtc3</i>         | chr7:80586626-80688877    | 6.7306   | 7.6876   | 0.1918  | 0.135178 |
| <i>Gde1</i>          | chr7:118688544-118705778  | 20.3221  | 18.4191  | -0.1418 | 0.065926 |
| <i>Ipo4</i>          | chr14:55625399-55637895   | 10.8409  | 9.8586   | -0.1370 | 0.139734 |
| <i>Tyms</i>          | chr5:30058201-30073617    | 1.0973   | 1.3561   | 0.3055  | 0.050583 |
| <i>Wdr3</i>          | chr3:100138179-100162407  | 22.4892  | 20.9211  | -0.1043 | 0.100927 |
| <i>Itgb1</i>         | chr8:128685653-128733200  | 62.4181  | 96.6515  | 0.6308  | 0.139123 |
| <i>2410089E03Rik</i> | chr15:8169105-8271158     | 4.8756   | 5.6652   | 0.2165  | 0.182734 |
| <i>Tyw1</i>          | chr5:130255618-130341563  | 5.6867   | 5.2252   | -0.1221 | 0.036360 |
| <i>Syngn2</i>        | chr11:117809667-117814283 | 18.7802  | 21.3349  | 0.1840  | 0.050541 |
| <i>Herc6</i>         | chr6:57580991-57665136    | 15.6962  | 18.3491  | 0.2253  | 0.166130 |
| <i>Zfp362</i>        | chr4:128773087-128806045  | 4.2856   | 5.3265   | 0.3137  | 0.193477 |
| <i>Slc43a2</i>       | chr11:75531693-75577575   | 6.3287   | 7.3952   | 0.2247  | 0.176080 |
| <i>Rdx</i>           | chr9:52047149-52088737    | 58.6352  | 54.0006  | -0.1188 | 0.136644 |
| <i>1700010I14Rik</i> | chr17:8988332-9008319     | 3.7595   | 3.0895   | -0.2832 | 0.101543 |
| <i>Zdhc9</i>         | chrX:48171968-48208878    | 1.5428   | 1.8854   | 0.2893  | 0.091372 |
| <i>Gls</i>           | chr1:52163447-52233232    | 27.7090  | 30.8598  | 0.1554  | 0.117174 |
| <i>Dennd1a</i>       | chr2:37798990-38287390    | 4.8428   | 5.7173   | 0.2395  | 0.149385 |
| <i>Gcfc2</i>         | chr6:81923668-81959915    | 5.7871   | 5.2576   | -0.1384 | 0.137542 |
| <i>Krr1</i>          | chr10:111972663-111988432 | 22.5574  | 20.7330  | -0.1217 | 0.119361 |
| <i>Fuca2</i>         | chr10:13499539-13519035   | 2.5710   | 3.0485   | 0.2458  | 0.101345 |
| <i>Parp3</i>         | chr9:106470321-106476949  | 31.0939  | 28.0814  | -0.1470 | 0.202767 |
| <i>Elovl6</i>        | chr3:129532385-129638495  | 5.9137   | 5.3567   | -0.1427 | 0.100025 |
| <i>Cdk2ap2</i>       | chr19:4097181-4099019     | 102.1894 | 90.5900  | -0.1738 | 0.232334 |
| <i>Gm6404</i>        | chr13:116153780-116154134 | 16.6725  | 12.7205  | -0.3903 | 0.143137 |
| <i>Ift52</i>         | chr2:163017353-163046141  | 10.5832  | 11.9680  | 0.1774  | 0.031243 |
| <i>Herc4</i>         | chr10:63243796-63317881   | 41.7668  | 46.3611  | 0.1506  | 0.075202 |
| <i>Zfp7</i>          | chr15:76879258-76892392   | 19.1142  | 17.6943  | -0.1114 | 0.041009 |
| <i>Grb7</i>          | chr11:98446393-98455373   | 1.0127   | 1.3925   | 0.4595  | 0.101890 |
| <i>Polr1b</i>        | chr2:129100994-129126594  | 10.5061  | 9.6854   | -0.1173 | 0.115802 |
| <i>Ak2</i>           | chr4:128991957-129011529  | 36.5003  | 33.8765  | -0.1076 | 0.063209 |
| <i>Gli1</i>          | chr10:127329888-127341589 | 5.0466   | 4.3233   | -0.2232 | 0.181637 |
| <i>Osgep</i>         | chr14:50906477-50924893   | 7.1077   | 6.4288   | -0.1448 | 0.081319 |
| <i>Hexim1</i>        | chr11:103116324-103119725 | 17.4398  | 20.3312  | 0.2213  | 0.127837 |
| <i>Wwp1</i>          | chr4:19608302-19708993    | 7.7225   | 8.6791   | 0.1685  | 0.066174 |
| <i>1700110K17Rik</i> | chr9:40323425-40343564    | 4.0132   | 5.2465   | 0.3866  | 0.081389 |
| <i>Ap4b1</i>         | chr3:103809519-103822025  | 18.6223  | 16.9929  | -0.1321 | 0.140954 |
| <i>Rcbt1</i>         | chr14:59201208-59237265   | 32.0743  | 30.1219  | -0.0906 | 0.088892 |
| <i>Cep76</i>         | chr18:67617396-67641336   | 3.9495   | 3.3663   | -0.2305 | 0.124833 |
| <i>Fam172a</i>       | chr13:77708689-78166238   | 16.5494  | 18.2573  | 0.1417  | 0.028830 |
| <i>Ift1</i>          | chr19:34640870-34650009   | 27.0144  | 43.5717  | 0.6897  | 0.110901 |
| <i>Plscr3</i>        | chr11:69846375-69852058   | 2.5970   | 3.2278   | 0.3137  | 0.136174 |
| <i>Mrpl27</i>        | chr11:94653766-94660089   | 8.7338   | 10.7073  | 0.2939  | 0.082185 |
| <i>Prpf39</i>        | chr12:65036332-65063386   | 42.5868  | 47.4207  | 0.1551  | 0.073567 |
| <i>Enoph1</i>        | chr5:100039993-100068762  | 13.4787  | 11.9060  | -0.1790 | 0.111775 |
| <i>1110001J03Rik</i> | chr6:38533501-38539449    | 11.0329  | 8.9195   | -0.3068 | 0.089785 |
| <i>Cdca2</i>         | chr14:67676330-67715841   | 0.8077   | 1.0929   | 0.4363  | 0.174948 |
| <i>Sufu</i>          | chr19:46396895-46488804   | 2.4555   | 3.0896   | 0.3314  | 0.210116 |
| <i>Eif5b</i>         | chr1:37998009-38055579    | 9.0390   | 10.2393  | 0.1799  | 0.102336 |
| <i>Zbed6</i>         | chr1:133619939-133661318  | 22.1155  | 24.8701  | 0.1694  | 0.148572 |
| <i>Rbfa</i>          | chr18:80192264-80200658   | 39.0564  | 34.9385  | -0.1607 | 0.157903 |
| <i>Cst7</i>          | chr2:150570414-150578944  | 12.0343  | 15.7958  | 0.3924  | 0.255672 |
| <i>Arid5a</i>        | chr1:36307732-36324029    | 30.6680  | 28.4184  | -0.1099 | 0.181406 |
| <i>Rcc1</i>          | chr4:132331918-132353605  | 6.3246   | 5.6941   | -0.1515 | 0.030407 |
| <i>Zmiz2</i>         | chr11:6389073-6406158     | 6.9126   | 8.7569   | 0.3412  | 0.284323 |
| <i>Crip1</i>         | chr12:113152011-113153877 | 315.9973 | 270.5182 | -0.2242 | 0.200083 |
| <i>Igflr1</i>        | chr7:30565426-30567962    | 39.4954  | 36.0772  | -0.1306 | 0.109810 |
| <i>Nufip1</i>        | chr14:76110890-76137379   | 10.4782  | 9.4328   | -0.1516 | 0.110521 |
| <i>Vamp3</i>         | chr4:151047299-151057963  | 12.8310  | 14.7229  | 0.1984  | 0.105184 |
| <i>Tab2</i>          | chr10:7905652-7956230     | 21.2333  | 20.0134  | -0.0854 | 0.061179 |
| <i>Axl</i>           | chr7:25757272-25788705    | 0.7374   | 1.1596   | 0.6530  | 0.276820 |
| <i>Tmed10</i>        | chr12:85340613-85374717   | 10.7617  | 11.9480  | 0.1509  | 0.000422 |
| <i>Sgpp1</i>         | chr12:75714247-75735729   | 44.6088  | 41.6731  | -0.0982 | 0.072437 |
| <i>Gm16534</i>       | chr2:32050085-32064911    | 25.5014  | 22.3803  | -0.1883 | 0.204838 |
| <i>Slc44a1</i>       | chr4:53440412-53622478    | 5.8165   | 5.2026   | -0.1609 | 0.126316 |
| <i>Eif5a</i>         | chr11:69916713-69921958   | 54.9699  | 49.5547  | -0.1496 | 0.187024 |
| <i>Ypel2</i>         | chr11:86936424-86993707   | 1.9430   | 2.3463   | 0.2721  | 0.064420 |
| <i>Gm15886</i>       | chr3:103771951-103789402  | 34.3960  | 39.3782  | 0.1952  | 0.132179 |
| <i>Gm15200</i>       | chr10:42698035-42698518   | 25.5574  | 21.9691  | -0.2183 | 0.024614 |



|                      |                           |          |          |         |          |
|----------------------|---------------------------|----------|----------|---------|----------|
| <i>Lmtd2</i>         | chr7:141210042-141214082  | 2.2526   | 2.8274   | 0.3279  | 0.005911 |
| <i>Nrp1</i>          | chr8:128359072-128505462  | 4.7164   | 9.1299   | 0.9529  | 0.164279 |
| <i>Pias3</i>         | chr3:96696383-96706070    | 2.8546   | 3.4822   | 0.2867  | 0.110714 |
| <i>Lef1</i>          | chr3:131110470-131224356  | 69.3642  | 78.3106  | 0.1750  | 0.130942 |
| <i>Kctd6</i>         | chr14:8214147-8223567     | 5.2474   | 4.6128   | -0.1860 | 0.058481 |
| <i>Lcp2</i>          | chr11:34046919-34092295   | 71.4490  | 77.5101  | 0.1175  | 0.030730 |
| <i>Tnrc6a</i>        | chr7:123123884-123195288  | 30.2721  | 33.8232  | 0.1600  | 0.122646 |
| <i>Ebna1bp2</i>      | chr4:118620798-118627776  | 23.4523  | 21.5105  | -0.1247 | 0.101958 |
| <i>Gm13050</i>       | chr4:143242023-143243368  | 24.7764  | 21.2254  | -0.2232 | 0.225671 |
| <i>Pmel</i>          | chr10:128706257-128720238 | 76.4533  | 72.0420  | -0.0857 | 0.072428 |
| <i>Lincpint</i>      | chr6:31165522-31218433    | 16.8355  | 20.5794  | 0.2897  | 0.225241 |
| <i>Zfp418</i>        | chr7:7171329-7183562      | 3.1640   | 2.6612   | -0.2497 | 0.064020 |
| <i>Hdac5</i>         | chr11:102194431-102230166 | 6.3291   | 5.7862   | -0.1294 | 0.164768 |
| <i>Fut8</i>          | chr12:77238103-77476338   | 7.1592   | 8.1511   | 0.1872  | 0.042516 |
| <i>Chdh</i>          | chr14:30009022-30040466   | 1.8347   | 1.5300   | -0.2620 | 0.165281 |
| <i>Srpk3</i>         | chrX:73774404-73778925    | 1.7321   | 2.3136   | 0.4176  | 0.155919 |
| <i>Twf1</i>          | chr15:94577950-94589889   | 12.6725  | 14.1764  | 0.1618  | 0.027899 |
| <i>Trappc10</i>      | chr10:78186724-78244642   | 35.4375  | 33.1351  | -0.0969 | 0.170287 |
| <i>Nck2</i>          | chr1:43445750-43570515    | 14.2680  | 13.2792  | -0.1036 | 0.063633 |
| <i>Casp3</i>         | chr8:46617448-46638706    | 11.7338  | 14.9846  | 0.3528  | 0.277908 |
| <i>Snord34</i>       | chr7:45126600-45126670    | 79.8558  | 64.4264  | -0.3097 | 0.046021 |
| <i>Cox7a2l</i>       | chr17:83501918-83514333   | 178.7420 | 154.7526 | -0.2079 | 0.234331 |
| <i>Tysnd1</i>        | chr10:61695513-61702773   | 13.8726  | 12.2864  | -0.1752 | 0.180846 |
| <i>Lmnb2</i>         | chr10:80901202-80918245   | 7.1238   | 6.4292   | -0.1480 | 0.072577 |
| <i>Zfc3h1</i>        | chr10:115384958-115432772 | 33.6803  | 36.6105  | 0.1204  | 0.033088 |
| <i>BC048403</i>      | chr10:121739936-121752878 | 1.6842   | 2.2370   | 0.4095  | 0.158258 |
| <i>Lgalsl</i>        | chr11:20823575-20831056   | 0.7859   | 1.2184   | 0.6326  | 0.326724 |
| <i>1110007C09Rik</i> | chr13:49202950-49216026   | 28.6773  | 25.0657  | -0.1942 | 0.185499 |
| <i>Gm25219</i>       | chr5:23487393-23487723    | 21.3644  | 26.8712  | 0.3309  | 0.136279 |
| <i>Prkab1</i>        | chr5:116013585-116024508  | 21.8631  | 20.1358  | -0.1187 | 0.093418 |
| <i>Ppp1r35</i>       | chr5:137778848-137780110  | 19.5372  | 17.2925  | -0.1761 | 0.064953 |
| <i>Zfp667</i>        | chr7:6286578-6307883      | 1.2101   | 1.5212   | 0.3301  | 0.046063 |
| <i>Trim12a</i>       | chr7:104299893-104315466  | 37.7145  | 41.6989  | 0.1449  | 0.080160 |
| <i>Mrps18b</i>       | chr17:35910378-35916389   | 8.6271   | 7.5194   | -0.1983 | 0.114828 |
| <i>NA</i>            | chr17:35994515-35999749   | 3.6157   | 4.3142   | 0.2548  | 0.097292 |
| <i>Tbcc</i>          | chr17:46890620-46892463   | 13.4414  | 12.1531  | -0.1454 | 0.016004 |
| <i>Fxn</i>           | chr19:24261452-24280605   | 4.6137   | 3.9213   | -0.2346 | 0.073320 |
| <i>Zfp281</i>        | chr1:136624900-136630053  | 51.7789  | 48.9600  | -0.0808 | 0.046588 |
| <i>Cyb5a</i>         | chr18:84851337-84880401   | 61.8611  | 53.8226  | -0.2008 | 0.226871 |
| <i>Arhgap21</i>      | chr2:20847918-20968881    | 0.4900   | 0.6443   | 0.3950  | 0.162852 |
| <i>Gfm1</i>          | chr3:67430095-67476529    | 12.4610  | 11.4600  | -0.1208 | 0.070894 |
| <i>Gatad2b</i>       | chr3:90341653-90358120    | 9.1185   | 10.6765  | 0.2276  | 0.079648 |
| <i>Tubd1</i>         | chr11:86544990-86567360   | 4.4363   | 5.3205   | 0.2622  | 0.045287 |
| <i>Thap2</i>         | chr10:115369965-115384435 | 6.5515   | 5.7567   | -0.1866 | 0.148947 |
| <i>Rab24</i>         | chr13:55319222-55321980   | 32.9615  | 30.6604  | -0.1044 | 0.078457 |
| <i>Coro7</i>         | chr16:4626132-4679777     | 13.2309  | 15.1925  | 0.1994  | 0.163589 |
| <i>Kcnq5</i>         | chr1:21398402-21961942    | 0.5991   | 0.8282   | 0.4671  | 0.185636 |
| <i>Gle1</i>          | chr2:29935425-29960371    | 10.2386  | 9.5434   | -0.1014 | 0.053765 |
| <i>Gm340</i>         | chr19:41582369-41586536   | 9.3803   | 10.8611  | 0.2115  | 0.135162 |
| <i>I7Rn6</i>         | chr7:89917528-89941199    | 6.0937   | 5.2455   | -0.2162 | 0.136869 |
| <i>Shhg12</i>        | chr4:132308677-132311024  | 27.3522  | 31.6254  | 0.2094  | 0.141649 |
| <i>Cd8b1</i>         | chr6:71322835-71337477    | 17.2021  | 14.6667  | -0.2300 | 0.202201 |
| <i>Ncln</i>          | chr10:81486248-81496392   | 43.5534  | 39.9345  | -0.1251 | 0.209594 |
| <i>Rnf135</i>        | chr11:80183850-80199757   | 2.8530   | 3.5188   | 0.3026  | 0.025535 |
| <i>Mthfd1</i>        | chr12:76255231-76319820   | 19.9076  | 18.4447  | -0.1101 | 0.087809 |
| <i>Pick1</i>         | chr15:79229172-79256674   | 4.2212   | 3.8469   | -0.1339 | 0.038220 |
| <i>Rxbp1</i>         | chr17:34031811-34038393   | 22.9076  | 21.0993  | -0.1186 | 0.152989 |
| <i>Gm9929</i>        | chr1:170868644-170881721  | 8.8411   | 7.6803   | -0.2031 | 0.078106 |
| <i>Smad7</i>         | chr18:75367528-75395935   | 45.5495  | 41.6825  | -0.1280 | 0.230140 |
| <i>Smc4</i>          | chr3:69004737-69034623    | 223.5166 | 250.8100 | 0.1662  | 0.137487 |
| <i>Evl</i>           | chr12:108554719-108688513 | 161.9141 | 148.2574 | -0.1271 | 0.206466 |
| <i>Brix1</i>         | chr15:10474778-10485947   | 12.7353  | 14.3514  | 0.1724  | 0.031878 |
| <i>R3hdm2</i>        | chr10:127380326-127499384 | 3.6501   | 4.3031   | 0.2375  | 0.158222 |
| <i>Rbm26</i>         | chr14:105106750-105177327 | 19.5067  | 21.2213  | 0.1215  | 0.031031 |
| <i>Shf</i>           | chr2:122348891-122369162  | 3.7308   | 3.1221   | -0.2570 | 0.096788 |
| <i>Mvk</i>           | chr5:114444268-114460591  | 4.9941   | 4.2378   | -0.2369 | 0.129375 |
| <i>Ccdc142os</i>     | chr6:83106607-83109054    | 10.4004  | 8.9556   | -0.2158 | 0.050662 |
| <i>Skiv2l2</i>       | chr13:112867779-112927380 | 30.5611  | 34.0766  | 0.1571  | 0.059310 |
| <i>Fryl</i>          | chr5:73020321-73256618    | 28.8460  | 32.7799  | 0.1844  | 0.194321 |
| <i>Med21</i>         | chr6:146642546-146650602  | 12.5544  | 10.7619  | -0.2223 | 0.162262 |
| <i>Brd7</i>          | chr8:88331038-88362194    | 21.5127  | 23.6465  | 0.1364  | 0.026808 |

|                      |                           |           |           |         |          |
|----------------------|---------------------------|-----------|-----------|---------|----------|
| <i>Kif23</i>         | chr9:61917279-61946799    | 3.1053    | 3.7068    | 0.2555  | 0.072220 |
| <i>Sec22a</i>        | chr16:35311130-35363918   | 5.3458    | 4.8625    | -0.1367 | 0.031836 |
| <i>Itpkb</i>         | chr1:180330484-180424802  | 50.9030   | 57.1851   | 0.1679  | 0.148321 |
| <i>Bard1</i>         | chr1:71027497-71103146    | 1.0152    | 1.2703    | 0.3234  | 0.064485 |
| <i>Ppil1</i>         | chr17:29250802-29264158   | 9.7270    | 11.1879   | 0.2019  | 0.054765 |
| <i>Myliip</i>        | chr13:45389741-45412019   | 41.3355   | 38.8337   | -0.0901 | 0.097389 |
| <i>Rassf1</i>        | chr9:107551554-107562263  | 13.7854   | 12.8571   | -0.1006 | 0.048839 |
| <i>Tmem134</i>       | chr19:4125933-4132307     | 25.1844   | 23.6958   | -0.0879 | 0.071235 |
| <i>Rpn2</i>          | chr2:157279016-157326319  | 51.0273   | 48.2749   | -0.0800 | 0.101891 |
| <i>Pcbp4</i>         | chr9:106453837-106464007  | 5.9341    | 5.0912    | -0.2210 | 0.069473 |
| <i>Kmt2c</i>         | chr5:25271797-25498783    | 17.9976   | 20.7407   | 0.2047  | 0.220798 |
| <i>Dcun1d5</i>       | chr9:7184565-7207031      | 61.5663   | 56.6321   | -0.1205 | 0.095974 |
| <i>Rpl6</i>          | chr5:121204480-121209241  | 51.8261   | 45.3534   | -0.1925 | 0.228254 |
| <i>Ndufs2</i>        | chr1:171234852-171247122  | 60.2353   | 56.3949   | -0.0950 | 0.087528 |
| <i>March7</i>        | chr2:60209886-60250676    | 37.7167   | 41.4771   | 0.1371  | 0.074184 |
| <i>Atf3</i>          | chr19:7494039-7538608     | 15.6560   | 17.5104   | 0.1615  | 0.109103 |
| <i>Rpain</i>         | chr11:70970212-70977833   | 14.6947   | 13.4272   | -0.1301 | 0.104292 |
| <i>Vezf1</i>         | chr11:88068278-88084729   | 27.2449   | 25.5343   | -0.0936 | 0.085632 |
| <i>Nfe2l3</i>        | chr6:51432669-51458768    | 9.0856    | 11.0956   | 0.2883  | 0.244754 |
| <i>Tmie</i>          | chr9:110865710-110880113  | 14.6379   | 12.0242   | -0.2838 | 0.302816 |
| <i>Rpl8</i>          | chr15:76904070-76906318   | 1884.0595 | 1664.4595 | -0.1788 | 0.234752 |
| <i>Fbxl15</i>        | chr19:46328183-46330446   | 3.6851    | 2.9852    | -0.3039 | 0.004255 |
| <i>C030005K06Rik</i> | chr18:50042729-50053844   | 1.5789    | 2.1874    | 0.4703  | 0.191449 |
| <i>Mrps15</i>        | chr4:126046924-126055532  | 25.0178   | 22.3992   | -0.1595 | 0.159208 |
| <i>Pisd</i>          | chr5:32736300-32785646    | 15.5877   | 17.3481   | 0.1544  | 0.059556 |
| <i>Ralgapa2</i>      | chr2:146239878-146512026  | 6.2468    | 7.0576    | 0.1761  | 0.157415 |
| <i>Agap3</i>         | chr5:24452176-24502047    | 22.9431   | 21.3340   | -0.1049 | 0.102465 |
| <i>Card9</i>         | chr2:26352175-26360918    | 5.9987    | 4.9291    | -0.2833 | 0.186745 |
| <i>Dyx1c1Ccp1</i>    | chr9:72958851-73016319    | 26.8761   | 25.2437   | -0.0904 | 0.109393 |
| <i>Cybb</i>          | chrX:9435251-9487771      | 1.7939    | 3.6993    | 1.0441  | 0.163403 |
| <i>Zfp945</i>        | chr17:22846696-22867134   | 9.7687    | 10.7943   | 0.1440  | 0.072985 |
| <i>Zscan20</i>       | chr4:128583538-128610098  | 3.8156    | 3.4323    | -0.1527 | 0.144645 |
| <i>Rcn3</i>          | chr7:45082912-45092221    | 4.2148    | 3.4626    | -0.2836 | 0.067620 |
| <i>Zfp191</i>        | chr18:24009701-24020810   | 12.0529   | 13.2269   | 0.1341  | 0.015424 |
| <i>1500011K16Rik</i> | chr2:127791387-127792488  | 12.6310   | 10.2040   | -0.3078 | 0.154993 |
| <i>Gm20633</i>       | chr3:96243549-96246380    | 2.9861    | 2.3507    | -0.3452 | 0.165167 |
| <i>Ikzf2</i>         | chr1:69531213-69685960    | 6.9620    | 13.0757   | 0.9093  | 0.183456 |
| <i>Gm15638</i>       | chr16:45945605-45971370   | 1.6829    | 2.1973    | 0.3848  | 0.212878 |
| <i>Ankrd52</i>       | chr10:128377114-128408704 | 5.1921    | 6.1932    | 0.2544  | 0.223381 |
| <i>Utp18</i>         | chr11:93859242-93885766   | 26.2684   | 23.7971   | -0.1425 | 0.172244 |
| <i>Mlx</i>           | chr11:101087276-101092207 | 37.2257   | 33.2786   | -0.1617 | 0.165804 |
| <i>Gm17259</i>       | chr13:81778772-81783749   | 1.6310    | 2.0070    | 0.2993  | 0.063654 |
| <i>Calu</i>          | chr6:29348068-29377110    | 32.6672   | 30.5560   | -0.0964 | 0.092774 |
| <i>Eps8l1</i>        | chr7:4460673-4479404      | 11.1069   | 6.2478    | -0.8300 | 0.195342 |
| <i>Epn1</i>          | chr7:5080234-5098178      | 27.6103   | 25.0157   | -0.1424 | 0.211781 |
| <i>Prr12</i>         | chr7:45027706-45052881    | 2.3745    | 3.0773    | 0.3740  | 0.257797 |
| <i>Gm1848</i>        | chrX:21146842-21147640    | 4.5973    | 5.9253    | 0.3661  | 0.017990 |
| <i>1700021K19Rik</i> | chr16:32821702-32877766   | 5.1643    | 4.7335    | -0.1257 | 0.041029 |
| <i>Ppp1ca</i>        | chr19:4192157-4195419     | 366.4007  | 329.2277  | -0.1543 | 0.208108 |
| <i>4930518I15Rik</i> | chr2:156856615-156857946  | 6.3132    | 7.6607    | 0.2791  | 0.062565 |
| <i>Supt20</i>        | chr3:54692822-54728762    | 24.7463   | 27.3825   | 0.1460  | 0.036828 |
| <i>Akap5</i>         | chr12:76324890-76334153   | 0.5125    | 0.7095    | 0.4693  | 0.174044 |
| <i>Cdc14b</i>        | chr13:64192544-64274973   | 3.0314    | 3.5341    | 0.2214  | 0.090575 |
| <i>Oas3</i>          | chr5:120753097-120777661  | 7.9686    | 11.9300   | 0.5822  | 0.154537 |
| <i>Retsat</i>        | chr6:72598474-72608425    | 3.2946    | 3.9427    | 0.2591  | 0.080156 |
| <i>Dctn1</i>         | chr6:83165919-83200117    | 17.5370   | 16.1233   | -0.1213 | 0.180870 |
| <i>Zfp607</i>        | chr7:27862556-27879567    | 16.2181   | 18.0548   | 0.1548  | 0.002638 |
| <i>Capn12</i>        | chr7:28881655-28893585    | 2.9142    | 3.5136    | 0.2698  | 0.046029 |
| <i>Ggact</i>         | chr14:122816222-122913757 | 24.2177   | 21.3146   | -0.1842 | 0.206074 |
| <i>Cops7b</i>        | chr1:86582903-86606978    | 6.4175    | 5.7102    | -0.1685 | 0.079254 |
| <i>Zfp52</i>         | chr17:21555045-21562066   | 8.3207    | 10.1816   | 0.2912  | 0.211643 |
| <i>Krtcap2</i>       | chr3:89245965-89249722    | 32.0408   | 27.5557   | -0.2176 | 0.196636 |
| <i>Dnm2</i>          | chr9:21424907-21507759    | 78.8658   | 74.4633   | -0.0829 | 0.148541 |
| <i>Dgka</i>          | chr10:128720140-128744056 | 543.0184  | 515.0586  | -0.0763 | 0.146779 |
| <i>Ss18</i>          | chr18:14624197-14682914   | 33.1576   | 31.3513   | -0.0808 | 0.063300 |
| <i>Rhof</i>          | chr5:123103043-123132692  | 29.4483   | 27.4635   | -0.1007 | 0.131975 |
| <i>Gm26771</i>       | chr3:83773852-83789956    | 5.2964    | 4.1656    | -0.3465 | 0.191307 |
| <i>Klhdc1</i>        | chr12:69241175-69284632   | 19.9424   | 18.1921   | -0.1325 | 0.151401 |
| <i>Nup205</i>        | chr6:35177429-35247590    | 22.3607   | 21.0533   | -0.0869 | 0.070198 |
| <i>Rpl27</i>         | chr11:101442297-101445529 | 10.7723   | 9.3272    | -0.2078 | 0.134214 |
| <i> Tubgcp6</i>      | chr15:89098356-89123087   | 16.5542   | 15.4153   | -0.1028 | 0.165454 |

|                      |                           |          |         |         |          |
|----------------------|---------------------------|----------|---------|---------|----------|
| <i>Pitpnm2</i>       | chr5:124118689-124249760  | 5.4218   | 6.3833  | 0.2355  | 0.227979 |
| <i>Actr1a</i>        | chr19:46376813-46395735   | 59.2299  | 56.2093 | -0.0755 | 0.023421 |
| <i>Ccna2</i>         | chr3:36564865-36572150    | 6.3262   | 7.7362  | 0.2903  | 0.212588 |
| <i>Rhog</i>          | chr7:102239122-102250123  | 28.0294  | 32.5661 | 0.2164  | 0.150453 |
| <i>Tpp1</i>          | chr7:105744846-105752207  | 7.3999   | 8.3545  | 0.1750  | 0.020627 |
| <i>Ccdc166</i>       | chr15:75979871-75982455   | 9.2836   | 8.1156  | -0.1940 | 0.178426 |
| <i>Sipa1</i>         | chr19:5651184-5663707     | 61.9894  | 57.7504 | -0.1022 | 0.192236 |
| <i>Plekhl1</i>       | chr10:80796099-80798626   | 31.7177  | 28.4755 | -0.1556 | 0.180475 |
| <i>Aff1</i>          | chr5:103692373-103855322  | 10.3824  | 11.9892 | 0.2076  | 0.206914 |
| <i>Mkrn1</i>         | chr6:39397803-39420462    | 25.6399  | 24.0944 | -0.0897 | 0.073839 |
| <i>Ptdss2</i>        | chr7:141122381-141157021  | 1.6410   | 1.9983  | 0.2842  | 0.054296 |
| <i>Cltb</i>          | chr13:54592400-54611344   | 8.6933   | 7.9926  | -0.1212 | 0.058649 |
| <i>Nudt19</i>        | chr7:35547184-35556304    | 11.2704  | 9.9370  | -0.1817 | 0.168390 |
| <i>Zfp414</i>        | chr17:33629089-33631779   | 8.5859   | 9.9456  | 0.2121  | 0.056660 |
| <i>Gm26637</i>       | chr17:78882041-78892500   | 2.5578   | 3.2567  | 0.3485  | 0.141481 |
| <i>Lman2l</i>        | chr1:36422064-36445271    | 2.1581   | 1.8286  | -0.2390 | 0.162895 |
| <i>Tet3</i>          | chr6:83362372-83441678    | 17.8820  | 21.2034 | 0.2458  | 0.258827 |
| <i>Igf1r</i>         | chr7:67952858-68226780    | 2.7013   | 4.4603  | 0.7235  | 0.206802 |
| <i>Bloc1s4</i>       | chr5:36747373-36748679    | 10.9603  | 9.3925  | -0.2227 | 0.158695 |
| <i>Zfp869</i>        | chr8:69706331-69710724    | 35.6359  | 40.1958 | 0.1737  | 0.101599 |
| <i>Gadd45gip1</i>    | chr8:84831521-84835482    | 29.4070  | 26.5957 | -0.1450 | 0.181770 |
| <i>Hmbox1</i>        | chr14:64811600-64949870   | 4.1931   | 4.9138  | 0.2288  | 0.179246 |
| <i>Rab8b</i>         | chr9:66843671-66919705    | 29.4774  | 33.8033 | 0.1976  | 0.192153 |
| <i>Tnfp1</i>         | chr11:54910784-54962917   | 26.5436  | 30.0970 | 0.1813  | 0.149052 |
| <i>Cuedc2</i>        | chr19:46329811-46338660   | 9.6148   | 8.3847  | -0.1975 | 0.125584 |
| <i>Mastl</i>         | chr2:23115605-23156024    | 0.8397   | 1.1098  | 0.4023  | 0.127766 |
| <i>Usp49</i>         | chr17:47630689-47686738   | 2.2603   | 2.6284  | 0.2177  | 0.104357 |
| <i>Mad1l1</i>        | chr5:140008688-140321552  | 13.5620  | 12.2570 | -0.1460 | 0.177056 |
| <i>Phgdh</i>         | chr3:98313169-98339990    | 6.6377   | 5.8040  | -0.1936 | 0.119847 |
| <i>Bmp8b</i>         | chr4:123105164-123132099  | 2.0249   | 1.6356  | -0.3081 | 0.176780 |
| <i>Pex14</i>         | chr4:148960534-149099876  | 4.1066   | 3.7164  | -0.1440 | 0.098312 |
| <i>Dalrd3</i>        | chr9:108569891-108572771  | 40.4619  | 37.6103 | -0.1054 | 0.112065 |
| <i>Smardc2</i>       | chr11:106263178-106272972 | 58.8172  | 55.4541 | -0.0849 | 0.096307 |
| <i>Phtf2</i>         | chr5:20758662-20882124    | 5.5624   | 6.4609  | 0.2161  | 0.154659 |
| <i>Apobec1</i>       | chr6:122577791-122602444  | 7.0603   | 8.3349  | 0.2394  | 0.141458 |
| <i>Nedd8</i>         | chr14:55662264-55671906   | 101.3881 | 89.5234 | -0.1796 | 0.201562 |
| <i>Hn1l</i>          | chr17:24942155-24960636   | 8.8198   | 7.9655  | -0.1470 | 0.052312 |
| <i>Mtfr1l</i>        | chr4:134525549-134535387  | 18.6167  | 17.1860 | -0.1154 | 0.135423 |
| <i>Ccdc55</i>        | chr11:77044291-77078435   | 8.8559   | 10.2433 | 0.2100  | 0.117400 |
| <i>Usp30</i>         | chr5:114100332-114123506  | 10.9416  | 9.9568  | -0.1361 | 0.099220 |
| <i>Trbv12-1</i>      | chr6:41113566-41114067    | 18.6787  | 23.4839 | 0.3303  | 0.113026 |
| <i>Mkl2</i>          | chr16:13256480-13417529   | 3.1047   | 3.6467  | 0.2321  | 0.156311 |
| <i>Jade1</i>         | chr3:41555733-41616862    | 14.3830  | 13.5450 | -0.0866 | 0.028950 |
| <i>E130102H24Rik</i> | chr4:101346530-101356248  | 13.7402  | 16.3223 | 0.2484  | 0.058512 |
| <i>Cptp</i>          | chr4:155864722-155869440  | 6.4810   | 5.7344  | -0.1766 | 0.054324 |
| <i>Dhdds</i>         | chr4:133969027-134000918  | 6.4840   | 7.5007  | 0.2101  | 0.101214 |
| <i>Tmem43</i>        | chr6:91473702-91488459    | 21.5704  | 20.0884 | -0.1027 | 0.126598 |
| <i>Fam50a</i>        | chrX:74313032-74320149    | 14.0246  | 16.9279 | 0.2714  | 0.159546 |
| <i>Angpt2</i>        | chr8:18690262-18741562    | 1.0635   | 1.4615  | 0.4587  | 0.231551 |
| <i>Spq7</i>          | chr8:123062941-123097760  | 19.3946  | 18.1061 | -0.0992 | 0.121608 |
| <i>Fam46a</i>        | chr9:85320438-85327124    | 7.5199   | 8.6489  | 0.2018  | 0.143661 |
| <i>Hagh</i>          | chr17:24840142-24864450   | 8.0510   | 7.0957  | -0.1822 | 0.050088 |
| <i>Cdc5l</i>         | chr17:45391891-45433707   | 34.8162  | 32.5984 | -0.0950 | 0.069062 |
| <i>Mtif3</i>         | chr5:146951572-146963800  | 18.7066  | 17.6499 | -0.0839 | 0.024933 |
| <i>Uhrf1bp1</i>      | chr17:27856489-27900040   | 0.7408   | 0.9417  | 0.3461  | 0.156256 |
| <i>Moap1</i>         | chr12:102742229-102743661 | 5.3600   | 6.5576  | 0.2909  | 0.058429 |
| <i>Gpr132</i>        | chr12:112850875-112860916 | 62.0817  | 57.3185 | -0.1152 | 0.177051 |
| <i>Ficd</i>          | chr5:113735781-113740600  | 3.7461   | 4.3822  | 0.2263  | 0.022752 |
| <i>Htatsf1</i>       | chrX:57053582-57067183    | 17.5534  | 19.1694 | 0.1271  | 0.007634 |
| <i>BC037032</i>      | chr15:4021685-4027402     | 1.8673   | 1.5362  | -0.2815 | 0.126477 |
| <i>Gpn2</i>          | chr4:133584361-133591735  | 11.0940  | 9.9211  | -0.1612 | 0.014058 |
| <i>Srsf10</i>        | chr4:135855746-135869908  | 17.8624  | 19.6445 | 0.1372  | 0.063006 |
| <i>Gm9625</i>        | chr13:67810245-67811200   | 22.5380  | 19.1738 | -0.2332 | 0.199779 |
| <i>Zfp784</i>        | chr7:5034438-5038446      | 4.7601   | 5.6282  | 0.2417  | 0.030309 |
| <i>Zfp235</i>        | chr7:24134173-24142266    | 5.6822   | 4.9546  | -0.1977 | 0.088306 |
| <i>Fdxr</i>          | chr11:115268023-115277050 | 10.1425  | 9.2130  | -0.1387 | 0.069731 |
| <i>Xrcc3</i>         | chr12:111803191-111813873 | 2.3821   | 2.9806  | 0.3233  | 0.105487 |
| <i>2610001J05Rik</i> | chr6:13867734-13871518    | 4.5971   | 5.4433  | 0.2438  | 0.072167 |
| <i>Slc16a13</i>      | chr11:70216788-70220994   | 1.5525   | 1.9740  | 0.3465  | 0.023853 |
| <i>Rangap1</i>       | chr15:81704247-81729919   | 39.4815  | 36.2579 | -0.1229 | 0.192957 |
| <i>Ldlrad4</i>       | chr18:67933256-68255549   | 12.1684  | 14.5454 | 0.2574  | 0.214848 |

|                      |                           |          |          |         |          |
|----------------------|---------------------------|----------|----------|---------|----------|
| <i>Il21</i>          | chr3:37222758-37232618    | 2.2212   | 5.9855   | 1.4301  | 0.227231 |
| <i>Stx6</i>          | chr1:155158702-155203517  | 38.9669  | 35.8066  | -0.1220 | 0.174500 |
| <i>F730043M19Rik</i> | chr12:33111710-33147597   | 2.0313   | 2.6544   | 0.3860  | 0.229932 |
| <i>Armc10</i>        | chr5:21645812-21662694    | 25.4078  | 23.1671  | -0.1332 | 0.171694 |
| <i>Hist1h2bb</i>     | chr13:23746733-23747202   | 30.6078  | 44.8819  | 0.5522  | 0.155993 |
| <i>Prss53</i>        | chr7:127885840-127890970  | 3.6088   | 4.3817   | 0.2800  | 0.080775 |
| <i>Srp19</i>         | chr18:34330846-34336599   | 13.4496  | 14.9021  | 0.1479  | 0.022115 |
| <i>Prrc1</i>         | chr18:57354732-57392719   | 2.2964   | 2.7788   | 0.2751  | 0.125440 |
| <i>Gm26712</i>       | chr6:57689432-57689649    | 26.9010  | 21.3261  | -0.3350 | 0.141112 |
| <i>Adap1</i>         | chr5:139271875-139325622  | 1.6502   | 2.2238   | 0.4303  | 0.252013 |
| <i>Z610021A01Rik</i> | chr7:41599260-41628533    | 13.0291  | 11.8797  | -0.1332 | 0.134349 |
| <i>Ccdc86</i>        | chr19:10941480-10949266   | 3.8980   | 4.5975   | 0.2381  | 0.088677 |
| <i>Magohb</i>        | chr6:131284387-131293244  | 3.9494   | 3.1870   | -0.3094 | 0.095743 |
| <i>Slx4</i>          | chr16:3979104-4003770     | 7.6296   | 8.6152   | 0.1753  | 0.129506 |
| <i>Htr2b</i>         | chr1:86099025-86111970    | 1.7252   | 2.2284   | 0.3693  | 0.070092 |
| <i>Atf2</i>          | chr2:73816508-73892639    | 9.7112   | 10.6829  | 0.1376  | 0.042838 |
| <i>Kansl1l</i>       | chr1:66719247-66817562    | 9.8173   | 10.8625  | 0.1460  | 0.063676 |
| <i>Ttc39b</i>        | chr4:83220299-83324255    | 19.3369  | 16.9717  | -0.1882 | 0.307282 |
| <i>Gak</i>           | chr5:108569410-108629739  | 48.0191  | 45.5578  | -0.0759 | 0.155763 |
| <i>NA</i>            | chr15:81857673-81858796   | 10.9677  | 9.1464   | -0.2620 | 0.166164 |
| <i>Tagln2</i>        | chr1:172500046-172507380  | 55.7915  | 50.6371  | -0.1399 | 0.199787 |
| <i>Bbc3</i>          | chr7:16309615-16318205    | 4.7639   | 3.9352   | -0.2757 | 0.197889 |
| <i>Gm20489</i>       | chrX:101261404-101269023  | 123.9056 | 136.2291 | 0.1368  | 0.069589 |
| <i>Spock2</i>        | chr10:60106218-60135198   | 1.8180   | 3.9136   | 1.1062  | 0.237713 |
| <i>Gcom1</i>         | chr9:71479324-71592265    | 23.4931  | 21.3855  | -0.1356 | 0.106611 |
| <i>Zfx2</i>          | chr14:55060261-55092324   | 0.9129   | 1.1817   | 0.3723  | 0.233090 |
| <i>Rpl37a</i>        | chr1:72711259-72713809    | 124.8751 | 105.5128 | -0.2431 | 0.268452 |
| <i>Cul2</i>          | chr18:3382987-3436377     | 11.0092  | 12.3242  | 0.1628  | 0.060865 |
| <i>NA</i>            | chr4:144972622-144974683  | 5.0453   | 6.0795   | 0.2690  | 0.126632 |
| <i>Foxj3</i>         | chr4:119537003-119629119  | 6.8486   | 7.5719   | 0.1448  | 0.055981 |
| <i>Rab11fip4</i>     | chr11:79591211-79698023   | 23.9679  | 22.3347  | -0.1018 | 0.206658 |
| <i>Ccni</i>          | chr5:93181932-93206495    | 37.1028  | 33.8660  | -0.1317 | 0.190883 |
| <i>Cln5</i>          | chr14:103070215-103077579 | 20.6226  | 18.9976  | -0.1184 | 0.118798 |
| <i>Mfsd12</i>        | chr10:81357490-81366225   | 3.6512   | 3.2035   | -0.1887 | 0.109294 |
| <i>Ube2g1</i>        | chr11:72607282-72686481   | 11.7006  | 13.4879  | 0.2051  | 0.150479 |
| <i>Ten1</i>          | chr11:116198854-116215318 | 9.0474   | 8.0621   | -0.1663 | 0.118835 |
| <i>Cfl2</i>          | chr12:54858816-54862877   | 14.4986  | 16.2887  | 0.1680  | 0.079047 |
| <i>Sap18</i>         | chr14:57798179-57804980   | 9.6022   | 8.7165   | -0.1396 | 0.113924 |
| <i>AI606181</i>      | chr19:41593362-41596158   | 2.9284   | 3.5987   | 0.2974  | 0.118211 |
| <i>Cr2</i>           | chr1:195136810-195176715  | 0.6537   | 0.8474   | 0.3745  | 0.103760 |
| <i>Gm28042</i>       | chr2:120027482-120043033  | 3.9027   | 3.4831   | -0.1641 | 0.209356 |
| <i>Diablo</i>        | chr5:123509764-123524176  | 13.6928  | 12.5811  | -0.1222 | 0.143975 |
| <i>Enc1</i>          | chr13:97241104-97253039   | 14.1143  | 12.9547  | -0.1237 | 0.157282 |
| <i>Acap1</i>         | chr11:69881566-69895539   | 101.4883 | 92.9967  | -0.1261 | 0.232298 |
| <i>Pcyt2</i>         | chr11:120610086-120617936 | 17.9082  | 16.2699  | -0.1384 | 0.185876 |
| <i>Mxd1</i>          | chr6:86647043-86669159    | 6.6607   | 7.9369   | 0.2529  | 0.193309 |
| <i>Erlc1</i>         | chr11:30930773-30954335   | 5.9804   | 6.8431   | 0.1944  | 0.048913 |
| <i>Slfn5</i>         | chr11:82951348-82962941   | 52.8163  | 61.0625  | 0.2093  | 0.204297 |
| <i>Trim65</i>        | chr11:116121845-116131128 | 6.3083   | 5.7131   | -0.1430 | 0.159681 |
| <i>Chsy1</i>         | chr7:66109514-66173789    | 3.1387   | 4.1450   | 0.4012  | 0.270122 |
| <i>Ppfia1</i>        | chr7:144476757-144553729  | 15.2508  | 14.2556  | -0.0974 | 0.185040 |
| <i>Slc35b2</i>       | chr17:45563963-45567669   | 10.7503  | 9.5776   | -0.1666 | 0.177072 |
| <i>Wrb</i>           | chr16:96145406-96157852   | 3.6595   | 3.1668   | -0.2086 | 0.155144 |
| <i>Uqcrq</i>         | chr11:53427921-53430831   | 12.5590  | 10.6184  | -0.2422 | 0.229899 |
| <i>Mir142hg</i>      | chr11:87755576-87757270   | 575.7569 | 527.6372 | -0.1259 | 0.221709 |
| <i>Snf8</i>          | chr11:96034884-96047430   | 10.3510  | 11.6676  | 0.1727  | 0.036205 |
| <i>Srsf2</i>         | chr11:116849900-116853094 | 119.0032 | 111.8002 | -0.0901 | 0.141552 |
| <i>Arel1</i>         | chr12:84918147-84970900   | 23.8944  | 22.4398  | -0.0906 | 0.177795 |
| <i>Heatr1</i>        | chr13:12395397-12438677   | 27.9952  | 26.2779  | -0.0913 | 0.184201 |
| <i>Timm50</i>        | chr7:28305515-28312072    | 8.4663   | 7.5807   | -0.1594 | 0.079297 |
| <i>Cyfp1</i>         | chr7:55841744-55930700    | 2.1481   | 3.7149   | 0.7903  | 0.213185 |
| <i>Bcl7c</i>         | chr7:127663352-127708933  | 1.2127   | 0.9860   | -0.2985 | 0.121485 |
| <i>Mki67</i>         | chr7:135689787-135716379  | 5.2307   | 7.7630   | 0.5696  | 0.161267 |
| <i>Pkn1</i>          | chr8:83669761-83699179    | 36.8080  | 34.0020  | -0.1144 | 0.208138 |
| <i>Gm614</i>         | chrX:101261375-101263992  | 12.9192  | 15.7552  | 0.2863  | 0.113428 |
| <i>Phf1</i>          | chr17:26933126-26937890   | 49.6569  | 45.6945  | -0.1200 | 0.208359 |
| <i>Kifc1</i>         | chr17:33875665-33890661   | 3.1439   | 2.7215   | -0.2082 | 0.035498 |
| <i>Gm21992</i>       | chr19:47429112-4811612    | 22.7737  | 21.3623  | -0.0923 | 0.150256 |
| <i>Fzd5</i>          | chr1:64730559-64737750    | 1.1763   | 1.5242   | 0.3737  | 0.210585 |
| <i>Pde6d</i>         | chr1:86542993-86582629    | 4.3327   | 5.1061   | 0.2369  | 0.009541 |
| <i>Slamf7</i>        | chr1:171634924-171649007  | 5.2250   | 6.6161   | 0.3406  | 0.123004 |

|                      |                           |          |          |         |          |
|----------------------|---------------------------|----------|----------|---------|----------|
| <i>Tmem154</i>       | chr3:84666191-84704575    | 14.4464  | 15.8781  | 0.1363  | 0.034577 |
| <i>Ecm1</i>          | chr3:95734146-95739569    | 4.3226   | 5.7778   | 0.4186  | 0.280045 |
| <i>Hipk1</i>         | chr3:103739814-103791563  | 43.5063  | 48.2989  | 0.1508  | 0.123401 |
| <i>Cnn3</i>          | chr3:121426540-121458205  | 17.7395  | 15.5880  | -0.1865 | 0.216988 |
| <i>Gar1</i>          | chr3:129824911-129831396  | 3.4062   | 4.2047   | 0.3038  | 0.051298 |
| <i>Slc15a4</i>       | chr5:127595663-127632897  | 6.0372   | 5.4211   | -0.1553 | 0.185619 |
| <i>Abi2</i>          | chr1:60409618-60481162    | 3.2685   | 3.8060   | 0.2196  | 0.136680 |
| <i>Eij2s2</i>        | chr2:154871409-154892935  | 8.8162   | 9.6925   | 0.1367  | 0.023287 |
| <i>Slc39a4</i>       | chr15:76612384-76616852   | 1.5754   | 2.4308   | 0.6257  | 0.258273 |
| <i>Cass4</i>         | chr2:172393793-172433757  | 0.9765   | 1.2765   | 0.3865  | 0.207647 |
| <i>Ado</i>           | chr10:67544511-67548955   | 17.5295  | 16.4423  | -0.0924 | 0.049362 |
| <i>Serpnb6b</i>      | chr13:32965208-32979067   | 7.6458   | 6.4969   | -0.2349 | 0.206787 |
| <i>Z510002D24Rik</i> | chr16:18836577-18840158   | 33.5733  | 30.3654  | -0.1449 | 0.178755 |
| <i>Mospd3</i>        | chr5:137596644-137601058  | 2.8707   | 2.2587   | -0.3459 | 0.146521 |
| <i>Ccdc66</i>        | chr14:27482411-27508460   | 14.3480  | 15.9420  | 0.1520  | 0.030163 |
| <i>Gpam</i>          | chr19:55069733-55099451   | 5.9178   | 5.2962   | -0.1601 | 0.110942 |
| <i>Clk1</i>          | chr1:58410188-58424066    | 124.9458 | 116.1575 | -0.1052 | 0.220857 |
| <i>Kif1b</i>         | chr4:149176318-149307693  | 16.8223  | 19.5466  | 0.2165  | 0.230468 |
| <i>Hnrmp3</i>        | chr10:63014663-63024217   | 12.5415  | 14.0701  | 0.1659  | 0.068799 |
| <i>Psm11</i>         | chr11:80428614-80473248   | 6.3161   | 7.0163   | 0.1517  | 0.023433 |
| <i>Timp2</i>         | chr11:118301068-118355740 | 8.8074   | 10.0577  | 0.1915  | 0.130652 |
| <i>Sostdc1</i>       | chr12:36314168-36318452   | 1.2448   | 4.0558   | 1.7040  | 0.281595 |
| <i>Nedd9</i>         | chr13:41309915-41487320   | 71.8855  | 67.3905  | -0.0932 | 0.142052 |
| <i>Papd7</i>         | chr13:69497958-69533839   | 6.1814   | 7.2056   | 0.2212  | 0.134106 |
| <i>Cox19</i>         | chr5:139336188-139345233  | 2.9534   | 3.4941   | 0.2425  | 0.054489 |
| <i>Wipi2</i>         | chr5:142629541-142670588  | 13.7939  | 12.9325  | -0.0930 | 0.171470 |
| <i>Rab19</i>         | chr6:39381174-39390380    | 10.4557  | 12.4559  | 0.2525  | 0.156177 |
| <i>Sept1</i>         | chr7:127214446-127218498  | 225.3856 | 210.8123 | -0.0964 | 0.157452 |
| <i>B130055M24Rik</i> | chr7:127448635-127460360  | 19.2103  | 16.9982  | -0.1765 | 0.244372 |
| <i>Cers4</i>         | chr8:4493025-4525757      | 5.2725   | 6.0906   | 0.2081  | 0.171959 |
| <i>Eri1</i>          | chr8:35465264-35495533    | 20.5963  | 19.2514  | -0.0974 | 0.091326 |
| <i>Phxr4</i>         | chr9:13431360-13432736    | 5.5614   | 6.8696   | 0.3048  | 0.135250 |
| <i>Mrps22</i>        | chr9:98588732-98601679    | 19.4754  | 17.4363  | -0.1596 | 0.089648 |
| <i>Tnrc6b</i>        | chr15:80711318-80941086   | 22.0390  | 25.3724  | 0.2032  | 0.254277 |
| <i>Zfp740</i>        | chr15:102203647-102215606 | 52.5090  | 50.0318  | -0.0697 | 0.059543 |
| <i>Dnajc3</i>        | chr14:118937931-118981702 | 58.8333  | 54.3260  | -0.1150 | 0.204139 |
| <i>Gm17552</i>       | chr19:4169565-4174284     | 8.3146   | 9.7874   | 0.2353  | 0.223912 |
| <i>Degs1</i>         | chr1:182275771-182282804  | 33.5420  | 31.6282  | -0.0848 | 0.032749 |
| <i>Ttc39c</i>        | chr18:12599925-12737050   | 0.9303   | 1.8054   | 0.9565  | 0.222983 |
| <i>Zer1</i>          | chr2:30097282-30124585    | 10.3882  | 11.6872  | 0.1700  | 0.153366 |
| <i>Wdsub1</i>        | chr2:59852363-59882591    | 1.7253   | 2.1537   | 0.3200  | 0.087218 |
| <i>Mettl15</i>       | chr2:109092296-109280748  | 2.5141   | 2.0432   | -0.2992 | 0.094492 |
| <i>Actl6a</i>        | chr3:32708545-32726968    | 29.4939  | 27.2245  | -0.1155 | 0.122169 |
| <i>Atp8b2</i>        | chr3:89939480-89963508    | 31.5868  | 29.7041  | -0.0887 | 0.212326 |
| <i>Vps72</i>         | chr3:95111021-95123051    | 11.2179  | 10.4007  | -0.1091 | 0.025608 |
| <i>Abcd3</i>         | chr3:121758908-121815302  | 6.6533   | 6.0477   | -0.1377 | 0.074302 |
| <i>Aknaos</i>        | chr4:63381357-63394018    | 20.8253  | 18.1585  | -0.1977 | 0.236744 |
| <i>Parp9</i>         | chr16:35938469-35972605   | 46.1432  | 52.6934  | 0.1915  | 0.182062 |
| <i>Slc16a6</i>       | chr11:109450854-109473598 | 5.0950   | 5.7596   | 0.1769  | 0.027789 |
| <i>Vipas39</i>       | chr12:87238874-87266286   | 21.1404  | 19.5324  | -0.1141 | 0.127180 |
| <i>Txnrd2</i>        | chr16:18426416-18479073   | 2.3901   | 2.9814   | 0.3189  | 0.170012 |
| <i>Scly</i>          | chr1:91298337-91321075    | 5.0175   | 5.7296   | 0.1915  | 0.081214 |
| <i>Sipa1l2</i>       | chr8:125418062-125492710  | 5.3972   | 4.8796   | -0.1454 | 0.169015 |
| <i>Prrc2a</i>        | chr17:35149075-35164897   | 19.4031  | 23.2977  | 0.2639  | 0.303867 |
| <i>Rabgap1l</i>      | chr1:160219173-160792938  | 21.9728  | 25.1384  | 0.1942  | 0.213026 |
| <i>Crtc1</i>         | chr8:70382354-70439579    | 1.0834   | 1.3090   | 0.2728  | 0.160096 |
| <i>Abcg3</i>         | chr5:104935056-104982718  | 22.8706  | 21.0689  | -0.1184 | 0.158266 |
| <i>Gpm6b</i>         | chrX:166238910-166388988  | 4.0812   | 8.0311   | 0.9766  | 0.194568 |
| <i>Gpr18</i>         | chr14:121911434-121915774 | 76.3745  | 71.1585  | -0.1021 | 0.125393 |
| <i>Ehd3</i>          | chr17:73804840-73832093   | 45.6750  | 42.8164  | -0.0932 | 0.169711 |
| <i>Pdia4</i>         | chr6:47796141-47813512    | 68.5116  | 63.9003  | -0.1005 | 0.179381 |
| <i>Jmjd1c</i>        | chr10:67096124-67256326   | 18.4736  | 20.1640  | 0.1263  | 0.096622 |
| <i>Nrn1</i>          | chr13:36725624-36734477   | 2.2855   | 3.2732   | 0.5182  | 0.259444 |
| <i>Myppop</i>        | chr7:18991244-19001766    | 3.3591   | 2.7916   | -0.2670 | 0.123149 |
| <i>Ywhaz</i>         | chr15:36770769-36794547   | 28.4391  | 32.2155  | 0.1799  | 0.127811 |
| <i>Umpps</i>         | chr16:33954781-33967038   | 12.8139  | 11.7241  | -0.1282 | 0.119223 |
| <i>Dnmbp</i>         | chr19:43847966-43912392   | 4.6420   | 5.4038   | 0.2192  | 0.140957 |
| <i>Gm23436</i>       | chr1:161036983-161037049  | 274.1498 | 234.8174 | -0.2234 | 0.183072 |
| <i>Mmadhc</i>        | chr2:50279880-50296801    | 18.6176  | 17.2319  | -0.1116 | 0.045678 |
| <i>Gm9870</i>        | chr5:72914295-72914942    | 14.0691  | 11.5206  | -0.2883 | 0.245560 |
| <i>Irf8</i>          | chr8:120736357-120756694  | 1.5989   | 1.9303   | 0.2717  | 0.161367 |

|                      |                           |          |          |         |          |
|----------------------|---------------------------|----------|----------|---------|----------|
| <i>Sccpdh</i>        | chr1:179668209-179687189  | 0.9010   | 2.1478   | 1.2533  | 0.238341 |
| <i>O610007P14Rik</i> | chr12:85815447-85824550   | 7.3117   | 6.5483   | -0.1591 | 0.142237 |
| <i>C1galt1c1</i>     | chrX:38630784-38635087    | 15.9082  | 14.1748  | -0.1664 | 0.126979 |
| <i>Nsmaf</i>         | chr4:6396206-6454271      | 18.4840  | 21.2971  | 0.2044  | 0.226995 |
| <i>Tha1</i>          | chr11:117867951-117873481 | 12.7159  | 11.0515  | -0.2024 | 0.283845 |
| <i>Ampd3</i>         | chr7:110768205-110812405  | 3.2278   | 3.7880   | 0.2309  | 0.144292 |
| <i>Tpm3-rs7</i>      | chr14:113314607-113316713 | 5.1099   | 4.2426   | -0.2684 | 0.146347 |
| <i>Dopey2</i>        | chr16:93711906-93810585   | 9.5061   | 10.8100  | 0.1854  | 0.179094 |
| <i>S100a6</i>        | chr3:90612893-90614414    | 24.7839  | 44.6857  | 0.8504  | 0.246313 |
| <i>Zfp868</i>        | chr8:69610856-69625548    | 8.2389   | 9.3021   | 0.1751  | 0.028465 |
| <i>Il10ra</i>        | chr9:45253836-45269149    | 18.4059  | 21.5466  | 0.2273  | 0.220812 |
| <i>Lgals3</i>        | chr14:47367750-47386160   | 1.9629   | 3.7977   | 0.9521  | 0.176114 |
| <i>Ap1g2</i>         | chr14:55098577-55106593   | 16.7422  | 18.6377  | 0.1547  | 0.101824 |
| <i>Cap1</i>          | chr4:122859046-122886056  | 203.1127 | 190.8071 | -0.0902 | 0.138773 |
| <i>Gmnn</i>          | chr13:24751844-24761923   | 3.5813   | 4.5490   | 0.3451  | 0.126380 |
| <i>Flywch1</i>       | chr17:23755422-23771591   | 8.8860   | 8.0429   | -0.1438 | 0.121738 |
| <i>Tmem170</i>       | chr8:111864897-111876675  | 3.7980   | 3.2011   | -0.2467 | 0.048026 |
| <i>2410015M20Rik</i> | chr17:56607451-56609771   | 55.5845  | 48.4505  | -0.1982 | 0.226881 |
| <i>Lgl1</i>          | chr11:60699722-60714186   | 14.4588  | 13.2747  | -0.1233 | 0.215916 |
| <i>Surf2</i>         | chr2:26916366-26920183    | 22.0231  | 20.6594  | -0.0922 | 0.058880 |
| <i>2310031A07Rik</i> | chr11:46440361-46447248   | 7.6614   | 9.1709   | 0.2595  | 0.036890 |
| <i>Psmg7</i>         | chr2:180036372-180042433  | 38.9824  | 35.7081  | -0.1266 | 0.174050 |
| <i>Limd2</i>         | chr11:106156255-106160860 | 290.7322 | 268.3950 | -0.1153 | 0.209529 |
| <i>Nudt4</i>         | chr10:95547006-95564167   | 9.6589   | 11.1577  | 0.2081  | 0.173903 |
| <i>Xrcc6bp1</i>      | chr10:126868429-126901371 | 3.6912   | 3.0138   | -0.2925 | 0.016431 |
| <i>Wbp1</i>          | chr6:83119043-83121559    | 21.1128  | 19.0358  | -0.1494 | 0.202794 |
| <i>Carm1</i>         | chr9:21546893-21589487    | 9.1269   | 10.5317  | 0.2065  | 0.174353 |
| <i>Dcps</i>          | chr9:35124407-35176061    | 26.6765  | 24.3924  | -0.1291 | 0.087057 |
| <i>Hinfp</i>         | chr9:44295672-44305671    | 16.9500  | 15.5788  | -0.1217 | 0.090561 |
| <i>Mrpl52</i>        | chr14:54426908-54429750   | 51.8724  | 60.3285  | 0.2179  | 0.126596 |
| <i>Rhbdl1</i>        | chr17:25834468-25837157   | 7.1251   | 5.7378   | -0.3124 | 0.264451 |
| <i>Dnah8</i>         | chr17:30624353-30875264   | 35.2688  | 27.2303  | -0.3732 | 0.225416 |
| <i>Daam2</i>         | chr17:49456021-49564337   | 0.8269   | 0.6596   | -0.3263 | 0.127721 |
| <i>Akt3</i>          | chr1:177020072-177258203  | 22.7916  | 25.0863  | 0.1384  | 0.078335 |
| <i>Spry1</i>         | chr3:37639946-37644598    | 1.6311   | 2.3589   | 0.5323  | 0.269146 |
| <i>Fam189b</i>       | chr3:89183142-89189295    | 29.5923  | 27.0837  | -0.1278 | 0.221247 |
| <i>Nop10</i>         | chr2:112261925-112263269  | 66.5493  | 57.6034  | -0.2083 | 0.263120 |
| <i>Rhoh</i>          | chr5:65863568-65896700    | 47.1813  | 42.7156  | -0.1435 | 0.233760 |
| <i>Jarid2</i>        | chr13:44729473-44921643   | 13.6119  | 14.9518  | 0.1355  | 0.085585 |
| <i>Zbtb8os</i>       | chr4:129335694-129354547  | 3.1499   | 3.6264   | 0.2032  | 0.020436 |
| <i>Litaf</i>         | chr16:10959274-11066157   | 5.3163   | 6.6063   | 0.3134  | 0.250557 |
| <i>Eif3i</i>         | chr4:129591959-129600648  | 45.8475  | 41.2692  | -0.1518 | 0.233700 |
| <i>Evi2b</i>         | chr11:79513384-79530589   | 17.5883  | 19.5912  | 0.1556  | 0.107240 |
| <i>Oas2</i>          | chr5:120730332-120749853  | 4.8572   | 8.0412   | 0.7273  | 0.176490 |
| <i>Atf7ip</i>        | chr6:136518850-136607377  | 26.6931  | 31.1457  | 0.2226  | 0.259074 |
| <i>Zfp715</i>        | chr7:43296196-43313294    | 15.6227  | 14.4695  | -0.1106 | 0.140688 |
| <i>Them6</i>         | chr15:74721233-74724373   | 12.0280  | 10.3122  | -0.2220 | 0.227771 |
| <i>Tbc1d4</i>        | chr14:101442359-101609191 | 11.6719  | 18.2557  | 0.6453  | 0.209001 |
| <i>Yif1a</i>         | chr19:5088537-5092879     | 17.6672  | 16.0825  | -0.1356 | 0.062629 |
| <i>Gm14446</i>       | chr19:34592887-34601968   | 91.1118  | 108.6355 | 0.2538  | 0.246272 |
| <i>Tor1aip1</i>      | chr1:156004598-156036480  | 12.9196  | 14.2865  | 0.1451  | 0.080102 |
| <i>Rprd1a</i>        | chr18:24484961-24530204   | 4.0753   | 3.6012   | -0.1784 | 0.109606 |
| <i>Ap1ar</i>         | chr3:127807263-127837492  | 23.5068  | 21.8915  | -0.1027 | 0.078696 |
| <i>Nup54</i>         | chr5:92415539-92435219    | 13.6822  | 12.3714  | -0.1453 | 0.142241 |
| <i>Mzt2</i>          | chr16:15848440-15863369   | 4.7124   | 3.7907   | -0.3140 | 0.125074 |
| <i>Naglu</i>         | chr11:101070011-101077672 | 9.8789   | 8.8166   | -0.1641 | 0.192906 |
| <i>Hps4</i>          | chr5:112343082-112378414  | 5.3278   | 4.8007   | -0.1503 | 0.087074 |
| <i>Gm13554</i>       | chr2:26059009-26060275    | 13.7010  | 11.0388  | -0.3117 | 0.183120 |
| <i>Tyw3</i>          | chr3:154576519-154597104  | 2.5471   | 2.1940   | -0.2153 | 0.117788 |
| <i>Pdlim1</i>        | chr19:40221172-40271842   | 10.1910  | 9.2385   | -0.1416 | 0.198411 |
| <i>Slc4a2</i>        | chr5:24423836-24440950    | 12.2560  | 11.2845  | -0.1191 | 0.205183 |
| <i>Dnmt1</i>         | chr9:20907205-20959888    | 51.0725  | 48.2224  | -0.0828 | 0.168596 |
| <i>4933427D14Rik</i> | chr11:72153928-72207459   | 5.8414   | 6.6783   | 0.1932  | 0.153327 |
| <i>Nxn</i>           | chr11:76257197-76399140   | 4.2779   | 3.6784   | -0.2178 | 0.137508 |
| <i>Galm</i>          | chr17:80127470-80185101   | 3.7175   | 4.4877   | 0.2716  | 0.145670 |
| <i>Fads1</i>         | chr19:10182887-10196870   | 6.4414   | 5.7046   | -0.1752 | 0.165132 |
| <i>D10Wsu102e</i>    | chr10:83360220-83368835   | 20.6780  | 22.9033  | 0.1475  | 0.062053 |
| <i>Tuba1a</i>        | chr15:98949840-98953551   | 35.4944  | 31.5827  | -0.1685 | 0.208669 |
| <i>Pam</i>           | chr1:97795113-98095646    | 1.3758   | 1.6487   | 0.2610  | 0.126188 |
| <i>Ece2</i>          | chr16:20611592-20646485   | 1.2980   | 1.1022   | -0.2359 | 0.101038 |
| <i>Rfx7</i>          | chr9:72532239-72622937    | 6.6928   | 7.8556   | 0.2311  | 0.196526 |

|                 |                           |          |          |         |          |
|-----------------|---------------------------|----------|----------|---------|----------|
| <i>Parp1</i>    | chr1:180568954-180601253  | 41.4204  | 38.3734  | -0.1102 | 0.174297 |
| <i>Rspry1</i>   | chr8:94601954-94660275    | 15.5858  | 14.5091  | -0.1033 | 0.134613 |
| <i>Gm21975</i>  | chr11:79513384-79530559   | 17.8445  | 19.8568  | 0.1542  | 0.107588 |
| <i>Eif3k</i>    | chr7:28971372-28981814    | 255.6113 | 228.2087 | -0.1636 | 0.244433 |
| <i>Zfp317</i>   | chr9:19641223-19648048    | 34.4661  | 32.2544  | -0.0957 | 0.056320 |
| <i>Alg3</i>     | chr16:20605450-20610768   | 8.8702   | 7.7221   | -0.2000 | 0.091225 |
| <i>Sssca1</i>   | chr19:5728087-5731732     | 19.2288  | 17.5698  | -0.1302 | 0.190749 |
| <i>Gm21958</i>  | chr3:54713175-54714353    | 6.0108   | 7.8346   | 0.3823  | 0.108213 |
| <i>Tnrc18</i>   | chr5:142750379-142817662  | 4.6288   | 5.5546   | 0.2630  | 0.259399 |
| <i>BC005624</i> | chr2:30972832-30982201    | 17.1803  | 15.6883  | -0.1311 | 0.145015 |
| <i>Zzz3</i>     | chr3:152395472-152462826  | 22.0495  | 20.8404  | -0.0814 | 0.135933 |
| <i>Atf6</i>     | chr1:170704673-170867771  | 2.1096   | 2.5377   | 0.2666  | 0.234987 |
| <i>Pip4k2a</i>  | chr2:18842254-18998126    | 40.2669  | 45.1037  | 0.1637  | 0.116777 |
| <i>Fam102b</i>  | chr3:108970996-109027607  | 9.6454   | 8.7789   | -0.1358 | 0.189874 |
| <i>Gm26538</i>  | chr18:34796894-34803484   | 2.9436   | 3.5912   | 0.2869  | 0.172944 |
| <i>Cdk19</i>    | chr10:40349307-40483818   | 18.2882  | 20.2082  | 0.1440  | 0.092114 |
| <i>NA</i>       | chr15:75979871-75982285   | 9.7585   | 8.5269   | -0.1946 | 0.207024 |
| <i>Gsk3a</i>    | chr7:25228257-25237851    | 40.7780  | 38.4332  | -0.0854 | 0.086116 |
| <i>Flad1</i>    | chr3:89401003-89411870    | 14.0139  | 12.9823  | -0.1103 | 0.149861 |
| <i>Tssc1</i>    | chr12:28751827-28867491   | 19.2606  | 17.6512  | -0.1259 | 0.078646 |
| <i>Acp1</i>     | chr12:30893325-30911612   | 4.3240   | 5.0289   | 0.2179  | 0.063150 |
| <i>Htra2</i>    | chr6:83051265-83055273    | 18.8610  | 17.2526  | -0.1286 | 0.193428 |
| <i>Zfp689</i>   | chr7:127443751-127449158  | 9.1434   | 8.0311   | -0.1871 | 0.178258 |
| <i>Fam89b</i>   | chr19:5728086-5729653     | 34.3247  | 31.3058  | -0.1328 | 0.150685 |
| <i>Dolk</i>     | chr2:30284228-30286354    | 8.2306   | 7.2447   | -0.1841 | 0.152227 |
| <i>Cept1</i>    | chr3:106502259-106547802  | 45.1016  | 49.2227  | 0.1261  | 0.058098 |
| <i>Surf6</i>    | chr2:26888627-26902879    | 20.5341  | 19.1374  | -0.1016 | 0.107321 |
| <i>Tpx2</i>     | chr2:152847963-152895321  | 1.5692   | 2.1057   | 0.4243  | 0.301876 |
| <i>Vrk2</i>     | chr11:26471321-26593999   | 5.0270   | 5.5927   | 0.1538  | 0.017783 |
| <i>Grap</i>     | chr11:61653264-61672784   | 105.7526 | 98.9299  | -0.0962 | 0.165126 |
| <i>Ccdc132</i>  | chr6:3498392-3603531      | 7.7886   | 7.2433   | -0.1047 | 0.028627 |
| <i>Cnot6</i>    | chr11:49671502-49712723   | 20.7134  | 23.0928  | 0.1569  | 0.152071 |
| <i>Ndufb11</i>  | chrX:20615325-20617619    | 51.8724  | 45.2482  | -0.1971 | 0.265856 |
| <i>Amdhd2</i>   | chr17:24155832-24163766   | 9.5074   | 8.5033   | -0.1610 | 0.194763 |
| <i>Eif4g3</i>   | chr4:137993021-138208508  | 13.2503  | 14.9543  | 0.1745  | 0.191796 |
| <i>Cfp</i>      | chrX:20925453-20931555    | 2.8418   | 3.5811   | 0.3336  | 0.092892 |
| <i>Nod1</i>     | chr6:54923941-54972612    | 7.3267   | 8.6405   | 0.2380  | 0.232077 |
| <i>Ndufs7</i>   | chr10:80249120-80256794   | 25.3375  | 22.9386  | -0.1435 | 0.204952 |
| <i>Ncaph2</i>   | chr15:89355718-89372826   | 34.9985  | 32.8283  | -0.0924 | 0.149783 |
| <i>Cdkn1b</i>   | chr6:134920400-134925513  | 76.8642  | 84.3157  | 0.1335  | 0.096222 |
| <i>Rbms2</i>    | chr10:128129469-128180297 | 2.3355   | 2.7769   | 0.2498  | 0.156994 |
| <i>Ctdp1</i>    | chr18:80407958-80469695   | 24.7760  | 23.3966  | -0.0826 | 0.115081 |
| <i>Phc3</i>     | chr3:30899294-30969415    | 11.8470  | 13.3738  | 0.1749  | 0.202010 |
| <i>Arsb</i>     | chr13:93771678-93943016   | 2.5308   | 3.1353   | 0.3090  | 0.194471 |
| <i>Mkln1</i>    | chr6:31398734-31516811    | 7.4480   | 8.0176   | 0.1063  | 0.012507 |
| <i>Slc39a14</i> | chr14:70303468-70351425   | 4.2669   | 3.8680   | -0.1416 | 0.225257 |
| <i>Dnajc25</i>  | chr4:58995061-59025573    | 1.2482   | 1.5201   | 0.2843  | 0.030109 |
| <i>Fn3krp</i>   | chr11:121421400-121431288 | 6.6022   | 5.7458   | -0.2004 | 0.157855 |
| <i>Chd7</i>     | chr4:8690405-8867659      | 22.6595  | 21.0275  | -0.1078 | 0.248512 |
| <i>Il15ra</i>   | chr2:11705286-11733986    | 2.2193   | 2.7051   | 0.2856  | 0.164775 |
| <i>Nhp2</i>     | chr11:51619734-51623714   | 36.5414  | 32.5636  | -0.1663 | 0.199179 |
| <i>Kmt2d</i>    | chr15:98831668-98871204   | 7.7352   | 10.3456  | 0.4195  | 0.197524 |
| <i>Psmb8</i>    | chr17:34197720-34201454   | 126.2356 | 116.8905 | -0.1110 | 0.218615 |
| <i>Rpl12</i>    | chr2:32961558-32964496    | 32.5595  | 30.2038  | -0.1083 | 0.155283 |
| <i>Impact</i>   | chr18:12972251-12992948   | 10.9456  | 12.1565  | 0.1514  | 0.045781 |
| <i>Mcee</i>     | chr7:64392644-64412121    | 7.1769   | 5.5143   | -0.3802 | 0.191762 |
| <i>Zfp709</i>   | chr8:71887263-71890912    | 8.6843   | 10.1228  | 0.2211  | 0.137037 |
| <i>Etv3</i>     | chr3:87525406-87540156    | 19.0001  | 17.7228  | -0.1004 | 0.213174 |
| <i>Pck2</i>     | chr14:55540265-55550017   | 4.8688   | 5.5572   | 0.1908  | 0.025969 |
| <i>Abce1</i>    | chr8:79683441-79711740    | 70.5052  | 65.8567  | -0.0984 | 0.168770 |
| <i>S100a4</i>   | chr3:90603769-90606045    | 41.6548  | 70.5874  | 0.7609  | 0.239039 |
| <i>Tmem97</i>   | chr11:78541816-78550777   | 3.6780   | 2.9753   | -0.3059 | 0.073725 |
| <i>Tsga10</i>   | chr1:37754571-37865298    | 0.3630   | 0.4735   | 0.3833  | 0.088722 |
| <i>Fbxl6</i>    | chr15:76535729-76538746   | 27.9795  | 25.6361  | -0.1262 | 0.182699 |
| <i>Pde1b</i>    | chr15:103503297-103530052 | 13.8721  | 12.4626  | -0.1546 | 0.234604 |
| <i>Bbs4</i>     | chr9:59321965-59353508    | 6.9557   | 7.9572   | 0.1941  | 0.055450 |
| <i>Spin2c</i>   | chrX:153832224-153834243  | 3.3878   | 2.6402   | -0.3597 | 0.160820 |
| <i>Spag5</i>    | chr11:78301528-78322457   | 0.8599   | 1.1179   | 0.3785  | 0.183785 |
| <i>Focad</i>    | chr4:88094628-88411011    | 7.4769   | 6.9403   | -0.1074 | 0.198773 |
| <i>Leprot</i>   | chr4:101647717-101659364  | 14.8699  | 16.6742  | 0.1652  | 0.044659 |
| <i>Acot7</i>    | chr4:152178133-152271855  | 4.4123   | 5.8529   | 0.4076  | 0.302744 |

|                       |                           |          |          |         |          |
|-----------------------|---------------------------|----------|----------|---------|----------|
| <i>Synrg</i>          | chr11:83964427-84044578   | 13.2575  | 14.6080  | 0.1400  | 0.096831 |
| <i>Usp42</i>          | chr5:143710324-143732280  | 7.7370   | 8.6722   | 0.1646  | 0.116810 |
| <i>Spr</i>            | chr6:85133677-85137766    | 21.0477  | 18.4946  | -0.1866 | 0.204585 |
| <i>Fam120b</i>        | chr17:15396245-15433580   | 25.0671  | 23.8324  | -0.0729 | 0.027979 |
| <i>Rgs19</i>          | chr2:181688418-181693977  | 54.9365  | 51.8575  | -0.0832 | 0.080405 |
| <i>Rock2</i>          | chr12:16894977-16988274   | 17.0810  | 18.8744  | 0.1440  | 0.108198 |
| <i>Cdca3</i>          | chr6:124829546-124833701  | 2.5478   | 3.2651   | 0.3579  | 0.213713 |
| <i>Igsf8</i>          | chr1:172261640-172319841  | 2.3800   | 2.0681   | -0.2027 | 0.110004 |
| <i>9930111J21Rik1</i> | chr11:48946149-48979398   | 11.5473  | 12.9530  | 0.1657  | 0.133831 |
| <i>Lamp2</i>          | chrX:38401356-38456454    | 4.5733   | 5.2552   | 0.2005  | 0.203538 |
| <i>Dock10</i>         | chr1:80501072-80758553    | 128.1837 | 121.7917 | -0.0738 | 0.127117 |
| <i>1500012F01Rik</i>  | chr2:167062933-167065862  | 24.7247  | 27.7460  | 0.1663  | 0.092167 |
| <i>Nup98</i>          | chr7:102134203-102210120  | 29.0406  | 31.7852  | 0.1303  | 0.070603 |
| <i>Zbtb39</i>         | chr10:127739537-127747335 | 2.0007   | 2.3797   | 0.2503  | 0.137166 |
| <i>Scai</i>           | chr2:39066213-39190730    | 8.7290   | 9.5652   | 0.1320  | 0.064655 |
| <i>Cacna1d</i>        | chr14:30039948-30491156   | 0.5303   | 0.9654   | 0.8642  | 0.207320 |
| <i>Fam58b</i>         | chr11:78750506-78751729   | 18.4288  | 16.1688  | -0.1888 | 0.239746 |
| <i>Prkca</i>          | chr11:107933386-108343928 | 11.5288  | 13.3409  | 0.2106  | 0.241776 |
| <i>Nphp3</i>          | chr9:104002543-104043730  | 0.6308   | 0.8000   | 0.3429  | 0.085717 |
| <i>Fth1</i>           | chr19:9982702-9985092     | 151.7404 | 180.3976 | 0.2496  | 0.203446 |
| <i>Slc20a1</i>        | chr2:129198763-129211616  | 57.4155  | 53.6058  | -0.0991 | 0.202209 |
| <i>Uhrf1bp1l</i>      | chr10:89744990-89819869   | 15.9757  | 17.3964  | 0.1229  | 0.056815 |
| <i>Mink1</i>          | chr11:70562880-70614483   | 13.2579  | 14.8179  | 0.1605  | 0.154368 |
| <i>Slc16a3</i>        | chr11:120948479-120960868 | 1.3865   | 1.8162   | 0.3895  | 0.261938 |
| <i>Tbcd</i>           | chr11:121451948-121617164 | 14.2821  | 13.3248  | -0.1001 | 0.198186 |
| <i>Frmf6</i>          | chr12:70825513-70902232   | 6.4999   | 7.4609   | 0.1989  | 0.145236 |
| <i>Fos</i>            | chr12:85473889-85477273   | 5.8786   | 7.1866   | 0.2898  | 0.229007 |
| <i>Ssr1</i>           | chr13:37971400-37994190   | 13.3476  | 14.6465  | 0.1340  | 0.074169 |
| <i>Rsb1l</i>          | chr5:20893027-20951822    | 16.7441  | 18.3054  | 0.1286  | 0.070362 |
| <i>Cct6a</i>          | chr5:129787438-129845820  | 97.1464  | 89.5833  | -0.1169 | 0.203626 |
| <i>Zkscan1</i>        | chr5:138085083-138107822  | 14.6992  | 15.8820  | 0.1117  | 0.006974 |
| <i>Arpc1b</i>         | chr5:145114214-145130705  | 75.8547  | 70.8520  | -0.0984 | 0.180934 |
| <i>Zfp783</i>         | chr6:47943170-47955913    | 3.4376   | 2.4259   | -0.5029 | 0.158349 |
| <i>Bax</i>            | chr7:45461694-45466898    | 47.7888  | 44.3439  | -0.1079 | 0.057687 |
| <i>Rab6a</i>          | chr7:100607409-100641268  | 23.3397  | 21.4946  | -0.1188 | 0.198903 |
| <i>Gtf3c1</i>         | chr7:125640954-125707780  | 24.7311  | 23.1496  | -0.0953 | 0.242948 |
| <i>D130040H23Rik</i>  | chr8:69300775-69303162    | 6.7424   | 8.1680   | 0.2767  | 0.145518 |
| <i>Upf1</i>           | chr8:70331521-70353273    | 36.8360  | 34.0171  | -0.1149 | 0.269542 |
| <i>Tyk2</i>           | chr9:21104068-21127346    | 27.1064  | 25.3302  | -0.0978 | 0.210301 |
| <i>Dpy19l1</i>        | chr9:24411775-24503140    | 10.3590  | 9.5916   | -0.1110 | 0.146221 |
| <i>Pafah1b2</i>       | chr9:45965310-45984871    | 30.9451  | 28.7581  | -0.1057 | 0.165010 |
| <i>Hmg20a</i>         | chr9:56418643-56496884    | 20.5679  | 22.7595  | 0.1461  | 0.070967 |
| <i>Hexa</i>           | chr9:59539666-59565105    | 35.1700  | 32.3123  | -0.1223 | 0.188033 |
| <i>Snx22</i>          | chr9:66065175-66069731    | 61.9164  | 56.2473  | -0.1385 | 0.244999 |
| <i>NA</i>             | chr9:110037288-110040467  | 2.5553   | 3.1373   | 0.2960  | 0.143767 |
| <i>Trak1</i>          | chr9:121366957-121474916  | 13.1064  | 14.5463  | 0.1504  | 0.099548 |
| <i>Atp6ap2</i>        | chrX:12587800-12617049    | 26.1880  | 24.0103  | -0.1253 | 0.185373 |
| <i>Upf3b</i>          | chrX:37091677-37110322    | 8.5342   | 9.5421   | 0.1610  | 0.073672 |
| <i>Scaf11</i>         | chr15:96411697-96460843   | 35.3631  | 38.2944  | 0.1149  | 0.045920 |
| <i>Galnt6os</i>       | chr15:100695779-100704896 | 27.1606  | 24.9477  | -0.1226 | 0.124397 |
| <i>Vdac2</i>          | chr14:21831268-21845879   | 28.8042  | 26.3700  | -0.1274 | 0.196636 |
| <i>Akap11</i>         | chr14:78492245-78536860   | 20.2541  | 18.8686  | -0.1022 | 0.234414 |
| <i>Ppp1r11</i>        | chr17:36948355-36951741   | 35.5210  | 32.3682  | -0.1341 | 0.202959 |
| <i>Chaf1a</i>         | chr17:56040415-56068026   | 1.4031   | 1.8119   | 0.3689  | 0.167293 |
| <i>Polr2h</i>         | chr16:20717664-20722267   | 13.2312  | 11.7146  | -0.1756 | 0.120256 |
| <i>Lsg1</i>           | chr16:30560493-30587592   | 13.3766  | 12.6134  | -0.0848 | 0.050354 |
| <i>Cd200r3</i>        | chr16:44943677-44981380   | 2.2299   | 1.8418   | -0.2759 | 0.253043 |
| <i>Mx2</i>            | chr16:97536082-97560899   | 3.4123   | 5.3324   | 0.6440  | 0.152305 |
| <i>Tmbim1</i>         | chr1:74288246-74305622    | 0.9713   | 1.1919   | 0.2954  | 0.215292 |
| <i>Cacybp</i>         | chr1:160202366-160212892  | 31.2630  | 27.6064  | -0.1795 | 0.273697 |
| <i>Gm4955</i>         | chr1:173468508-173491041  | 26.9641  | 31.0656  | 0.2043  | 0.224599 |
| <i>Gtf3c4</i>         | chr2:28822298-28840360    | 8.6952   | 7.9824   | -0.1234 | 0.186088 |
| <i>Arhgap15os</i>     | chr2:44059237-44065324    | 8.0736   | 9.3047   | 0.2047  | 0.060874 |
| <i>Cers6</i>          | chr2:68861440-69114282    | 13.6229  | 12.7369  | -0.0970 | 0.165180 |
| <i>Npepl1</i>         | chr2:174110348-174123070  | 31.8755  | 29.7960  | -0.0973 | 0.216668 |
| <i>Mrps28</i>         | chr3:8802145-8923918      | 15.5328  | 13.1349  | -0.2419 | 0.166580 |
| <i>Tet2</i>           | chr3:133463678-133544390  | 10.1372  | 11.0778  | 0.1280  | 0.076742 |
| <i>Adh5</i>           | chr3:138443092-138455499  | 41.3773  | 38.3049  | -0.1113 | 0.174250 |
| <i>Zc3h12a</i>        | chr4:125118422-125127840  | 10.2794  | 12.2820  | 0.2568  | 0.260052 |
| <i>Gm26615</i>        | chr4:133085473-133089146  | 1.3615   | 1.7469   | 0.3597  | 0.124648 |
| <i>Atp6v0e</i>        | chr17:26676395-26699644   | 20.4771  | 18.7369  | -0.1281 | 0.179150 |



|                  |                           |          |          |         |          |
|------------------|---------------------------|----------|----------|---------|----------|
| <i>Cnm2</i>      | chr19:46761595-46878795   | 3.3640   | 2.9008   | -0.2137 | 0.185007 |
| <i>Tprgl</i>     | chr4:154157484-154160666  | 78.5335  | 73.0195  | -0.1050 | 0.195373 |
| <i>Mib1</i>      | chr18:10725547-10818704   | 10.4270  | 11.3895  | 0.1274  | 0.061483 |
| <i>Gm26964</i>   | chr11:61865474-61867639   | 7.0213   | 8.5655   | 0.2868  | 0.070378 |
| <i>Traj6</i>     | chr14:54212687-54212749   | 134.2532 | 163.8632 | 0.2875  | 0.141078 |
| <i>H2-Q5</i>     | chr17:35394125-35397800   | 27.8193  | 32.8708  | 0.2407  | 0.257678 |
| <i>Vim</i>       | chr2:13573926-13582826    | 159.7141 | 148.1196 | -0.1087 | 0.211642 |
| <i>Dak</i>       | chr19:10592199-10604258   | 3.1990   | 3.9314   | 0.2974  | 0.163357 |
| <i>Tram1</i>     | chr1:13564701-13589864    | 153.4428 | 141.1975 | -0.1200 | 0.230673 |
| <i>Polr2b</i>    | chr5:77310146-77349324    | 40.7290  | 38.1864  | -0.0930 | 0.163609 |
| <i>Dhx30</i>     | chr9:110084319-110117830  | 15.9040  | 14.9528  | -0.0890 | 0.187231 |
| <i>Zfp367</i>    | chr13:64133021-64153202   | 4.2684   | 4.8815   | 0.1936  | 0.117634 |
| <i>Sec13</i>     | chr6:113728066-113740743  | 60.2088  | 55.4186  | -0.1196 | 0.196759 |
| <i>Edrf1</i>     | chr7:133637542-133672971  | 19.3507  | 18.0331  | -0.1017 | 0.204550 |
| <i>Bcl2</i>      | chr1:106538177-106714274  | 72.3729  | 66.8925  | -0.1136 | 0.276452 |
| <i>Ppp4r1-ps</i> | chr2:173579319-173659640  | 1.8036   | 2.1142   | 0.2293  | 0.176050 |
| <i>Chil5</i>     | chr3:106016918-106024916  | 23.4169  | 16.9498  | -0.4663 | 0.247848 |
| <i>Adcy7</i>     | chr8:88272402-88329962    | 95.5547  | 89.6264  | -0.0924 | 0.243547 |
| <i>Csrp1</i>     | chr1:135720060-135752232  | 50.6897  | 45.9766  | -0.1408 | 0.252478 |
| <i>Nkg7</i>      | chr7:43437072-43438246    | 7.6911   | 14.1330  | 0.8778  | 0.192287 |
| <i>Arhgap17</i>  | chr7:123279149-123369915  | 3.1940   | 3.8088   | 0.2540  | 0.167522 |
| <i>Kars</i>      | chr8:111993439-112011323  | 59.5728  | 55.2169  | -0.1095 | 0.177847 |
| <i>Cmc2</i>      | chr8:116888684-116921455  | 3.8531   | 3.1808   | -0.2766 | 0.175922 |
| <i>Ubi7</i>      | chr9:57910985-57929968    | 15.2684  | 17.8579  | 0.2260  | 0.144265 |
| <i>Cep170</i>    | chr1:176733652-176807124  | 6.8495   | 7.8272   | 0.1925  | 0.159900 |
| <i>Zkscan6</i>   | chr11:65807174-65829239   | 19.8829  | 18.4155  | -0.1106 | 0.126598 |
| <i>Dlg1</i>      | chr16:31663442-31873356   | 13.8823  | 15.0176  | 0.1134  | 0.011529 |
| <i>Crnk1</i>     | chr2:145917478-145935014  | 23.2388  | 21.5912  | -0.1061 | 0.148933 |
| <i>Mrpl55</i>    | chr11:59202485-59206134   | 13.4104  | 11.5536  | -0.2150 | 0.162745 |
| <i>NA</i>        | chr13:23575762-23577011   | 3.1872   | 4.1391   | 0.3770  | 0.159722 |
| <i>Pdxdc1</i>    | chr16:13833147-13903131   | 17.5254  | 16.7292  | -0.0671 | 0.031329 |
| <i>Rundc1</i>    | chr11:101425084-101435673 | 10.3145  | 9.4502   | -0.1263 | 0.173792 |
| <i>Agk</i>       | chr6:40325477-40396762    | 7.3042   | 6.4939   | -0.1696 | 0.102556 |
| <i>Osbp2</i>     | chr2:180119305-180162680  | 16.0590  | 15.0661  | -0.0921 | 0.061351 |
| <i>Gm13212</i>   | chr4:145585165-145625345  | 1.7069   | 2.2068   | 0.3706  | 0.160988 |
| <i>NA</i>        | chr10:79540245-79541960   | 14.9975  | 13.6377  | -0.1371 | 0.053977 |
| <i>Ikzf4</i>     | chr10:128630842-128645991 | 1.1990   | 1.5259   | 0.3479  | 0.198890 |
| <i>Slc35d2</i>   | chr13:64096309-64129330   | 11.5035  | 13.0224  | 0.1789  | 0.096213 |
| <i>Zxdc</i>      | chr6:90369491-90403490    | 8.2980   | 7.7344   | -0.1015 | 0.194390 |
| <i>Rad52</i>     | chr6:119902697-119922828  | 12.0587  | 11.1898  | -0.1079 | 0.046081 |
| <i>Cnot1</i>     | chr8:95719450-95807462    | 47.7232  | 52.2213  | 0.1299  | 0.110409 |
| <i>Galns</i>     | chr8:122578237-122611487  | 8.6314   | 7.7085   | -0.1631 | 0.188064 |
| <i>Cxcr5</i>     | chr9:44511787-44556391    | 9.7713   | 15.5719  | 0.6723  | 0.265798 |
| <i>Pcsk7</i>     | chr9:45906568-45929692    | 22.0113  | 20.6931  | -0.0891 | 0.138529 |
| <i>Trip4</i>     | chr9:65828929-65908794    | 5.6271   | 6.1759   | 0.1343  | 0.015834 |
| <i>Cdpf1</i>     | chr15:85806971-85811697   | 16.0881  | 14.0496  | -0.1955 | 0.199169 |
| <i>Actr8</i>     | chr14:29978336-29993221   | 34.0976  | 31.9427  | 0.3942  | 0.136946 |
| <i>Tsr3</i>      | chr17:25240169-25242798   | 22.5071  | 20.1010  | -0.1631 | 0.195298 |
| <i>Brd4</i>      | chr17:32196273-32284722   | 6.3903   | 7.2949   | 0.1910  | 0.203280 |
| <i>Lclat1</i>    | chr17:73107984-73243368   | 4.9086   | 5.9688   | 0.2821  | 0.268481 |
| <i>Ttc9c</i>     | chr19:8809074-8819333     | 14.7394  | 13.4794  | -0.1289 | 0.184381 |
| <i>Adipor1</i>   | chr1:134415377-134433351  | 25.5430  | 23.8386  | -0.0996 | 0.166423 |
| <i>Cytip</i>     | chr2:58129136-58195532    | 174.8913 | 164.8632 | -0.0852 | 0.178043 |
| <i>Ssr2</i>      | chr3:88579670-88588397    | 53.3586  | 48.5127  | -0.1374 | 0.227026 |
| <i>Slc25a24</i>  | chr3:109123148-109168457  | 6.9582   | 8.1951   | 0.2360  | 0.231014 |
| <i>Gbp7</i>      | chr3:142530337-142550083  | 45.4490  | 50.3846  | 0.1487  | 0.140555 |
| <i>Ifngr2</i>    | chr16:91547071-91565169   | 21.0043  | 19.3402  | -0.1191 | 0.185383 |
| <i>NA</i>        | chr7:127559385-127565266  | 8.4245   | 10.5560  | 0.3254  | 0.341750 |
| <i>Lss</i>       | chr10:76531587-76557138   | 5.0087   | 4.4712   | -0.1638 | 0.277901 |
| <i>Syne2</i>     | chr12:75818133-76110926   | 3.0838   | 2.8637   | -0.1068 | 0.183172 |
| <i>Rps6ka5</i>   | chr12:100549777-100725028 | 4.4499   | 3.9720   | -0.1639 | 0.118817 |
| <i>Srd5a3</i>    | chr5:76140270-76155504    | 6.6475   | 6.1473   | -0.1129 | 0.019939 |
| <i>Fam63b</i>    | chr9:70599013-70657174    | 30.2548  | 28.2972  | -0.0965 | 0.198228 |
| <i>Mrpl57</i>    | chr14:57826238-57828745   | 16.3474  | 14.3985  | -0.1831 | 0.220099 |
| <i>Ciita</i>     | chr16:10488177-10527564   | 1.3820   | 1.6985   | 0.2975  | 0.149191 |
| <i>Gsto1</i>     | chr19:47854969-47864790   | 2.6670   | 3.5139   | 0.3979  | 0.242830 |
| <i>Prkcq</i>     | chr2:11172112-11301226    | 104.1569 | 100.4237 | -0.0527 | 0.062041 |
| <i>Coa7</i>      | chr4:108328139-108341544  | 5.4964   | 4.9950   | -0.1380 | 0.076561 |
| <i>Homer3</i>    | chr8:70282826-70294361    | 6.4687   | 5.8613   | -0.1422 | 0.061338 |
| <i>Jmjd8</i>     | chr17:25828866-25831842   | 36.1231  | 34.1782  | -0.0798 | 0.117351 |
| <i>Katna1</i>    | chr10:7725999-7763150     | 32.1082  | 29.2284  | -0.1356 | 0.214780 |

|                       |                           |           |          |         |          |
|-----------------------|---------------------------|-----------|----------|---------|----------|
| <i>H2afy</i>          | chr13:56073618-56136361   | 43.2439   | 41.0753  | -0.0742 | 0.153091 |
| <i>Qprt</i>           | chr7:127107113-127122226  | 8.3819    | 9.7311   | 0.2153  | 0.164015 |
| <i>Stk11</i>          | chr10:80115802-80130682   | 21.6524   | 20.0849  | -0.1084 | 0.235933 |
| <i>Snx14</i>          | chr9:88376746-88438958    | 13.2961   | 14.7152  | 0.1463  | 0.080603 |
| <i>Axin2</i>          | chr11:108920348-108950783 | 11.8203   | 10.8311  | -0.1261 | 0.271289 |
| <i>2900005J15Rik</i>  | chr5:25100982-25110109    | 2.5833    | 3.2427   | 0.3279  | 0.200211 |
| <i>Psemb6</i>         | chr11:70525366-70527858   | 57.3528   | 50.5380  | -0.1825 | 0.299343 |
| <i>2810403A07Rik</i>  | chr3:88685793-88712933    | 67.4309   | 63.4702  | -0.0873 | 0.190483 |
| <i>Aprt</i>           | chr8:122574636-122576907  | 51.0519   | 46.4682  | -0.1357 | 0.178430 |
| <i>Fundc1</i>         | chrX:17556563-17572325    | 8.5066    | 9.7243   | 0.1930  | 0.097374 |
| <i>Ccnt1</i>          | chr15:98538688-98570923   | 22.1321   | 20.8269  | -0.0877 | 0.171848 |
| <i>1810012K08Rik</i>  | chr2:26138545-26139543    | 15.4183   | 13.3754  | -0.2051 | 0.064709 |
| <i>Tlr1</i>           | chr5:64924810-64932761    | 51.1943   | 47.1372  | -0.1191 | 0.262529 |
| <i>Dhx38</i>          | chr8:109548016-109565601  | 28.5246   | 26.9804  | -0.0803 | 0.105122 |
| <i>Dip2b</i>          | chr15:100038663-100219473 | 19.9384   | 21.9289  | 0.1373  | 0.135511 |
| <i>Cul7</i>           | chr17:46650336-46664364   | 1.4223    | 1.2149   | -0.2274 | 0.182151 |
| <i>BC029214</i>       | chr2:25455140-25461094    | 24.0296   | 22.0425  | -0.1245 | 0.198185 |
| <i>Hist3h2a</i>       | chr11:58954684-58956674   | 22.2940   | 19.7455  | -0.1751 | 0.229237 |
| <i>9330104G04Rik</i>  | chr7:16871353-16874886    | 3.1318    | 2.6621   | -0.2344 | 0.023417 |
| <i>Cenpj</i>          | chr14:56526760-56571846   | 8.2522    | 9.3791   | 0.1847  | 0.102767 |
| <i>Cd48</i>           | chr1:171682008-171705258  | 128.0865  | 118.2709 | -0.1150 | 0.259486 |
| <i>D17H6S53E</i>      | chr17:35126372-35128855   | 22.7216   | 21.2405  | -0.0972 | 0.070339 |
| <i>Gm11998</i>        | chr11:11557420-11579460   | 7.2336    | 5.8289   | -0.3115 | 0.250853 |
| <i>Irf5</i>           | chr6:29526624-29541869    | 8.2917    | 9.4063   | 0.1820  | 0.103218 |
| <i>Scaper</i>         | chr9:55549882-55919605    | 17.5013   | 19.3298  | 0.1434  | 0.102813 |
| <i>Ubn1</i>           | chr16:5050067-5086285     | 37.5624   | 35.2923  | -0.0899 | 0.240259 |
| <i>C330006A16Rik</i>  | chr2:26136813-26140521    | 15.6960   | 14.3663  | -0.1277 | 0.168428 |
| <i>Tceanc2</i>        | chr4:107134154-107179116  | 7.2434    | 6.7092   | -0.1105 | 0.174499 |
| <i>Cdc40</i>          | chr10:40831625-40883143   | 11.7346   | 13.3382  | 0.1848  | 0.117334 |
| <i>Trbd1</i>          | chr6:41533200-41533212    | 1124.3221 | 966.9559 | -0.2175 | 0.202646 |
| <i>9930111J21Rik2</i> | chr11:49015873-49051242   | 13.7951   | 15.0032  | 0.1211  | 0.052189 |
| <i>Ppm1k</i>          | chr6:57506501-57535426    | 14.8758   | 13.5651  | -0.1331 | 0.255064 |
| <i>Wdr55</i>          | chr18:36760238-36763708   | 30.8831   | 28.8327  | -0.0991 | 0.035599 |
| <i>Meaf6</i>          | chr4:125085133-125113238  | 5.2035    | 5.8510   | 0.1692  | 0.057556 |
| <i>Gm166</i>          | chr7:127582383-127588595  | 14.1742   | 13.0344  | -0.1209 | 0.115673 |
| <i>Chpt1</i>          | chr10:88452744-88504073   | 0.7184    | 0.9071   | 0.3365  | 0.189087 |
| <i>Wbp2</i>           | chr11:116078572-116086995 | 12.7087   | 14.7091  | 0.2109  | 0.212248 |
| <i>2700038G22Rik</i>  | chr5:23850596-23854924    | 4.0282    | 3.2889   | -0.2925 | 0.126562 |
| <i>Gm26858</i>        | chr17:32369304-32378445   | 3.6963    | 3.1627   | -0.2249 | 0.057669 |
| <i>Tubb5</i>          | chr17:35833925-35838306   | 267.0404  | 250.3567 | -0.0931 | 0.188829 |
| <i>Pfn2</i>           | chr3:57841894-57847564    | 1.9912    | 2.4460   | 0.2968  | 0.127151 |
| <i>2810425M01Rik</i>  | chr10:77486663-77516430   | 7.4153    | 6.4631   | -0.1983 | 0.184759 |
| <i>Rilp2</i>          | chr5:124463264-124478366  | 10.9104   | 13.5402  | 0.3115  | 0.275773 |
| <i>Scaf8</i>          | chr17:3114971-3198855     | 31.2047   | 33.8774  | 0.1186  | 0.074575 |
| <i>Hectd2</i>         | chr19:36554638-36621135   | 1.6645    | 1.9579   | 0.2342  | 0.161598 |
| <i>Asb1</i>           | chr1:91540564-91559590    | 5.5216    | 5.0176   | -0.1381 | 0.233935 |
| <i>Fastkd5</i>        | chr2:130613839-130630027  | 11.5153   | 10.5463  | -0.1268 | 0.119574 |
| <i>Padi3</i>          | chr4:140785364-140810648  | 1.3884    | 1.1452   | -0.2779 | 0.020518 |
| <i>Xpo7</i>           | chr14:70654245-70766628   | 9.5657    | 9.0830   | -0.0747 | 0.103149 |
| <i>Rpl36al</i>        | chr12:69182730-69184083   | 15.2818   | 13.3634  | -0.1935 | 0.189343 |
| <i>Gm26799</i>        | chr6:112696776-112704668  | 3.9052    | 4.7653   | 0.2872  | 0.037188 |
| <i>Irf2bp2</i>        | chr8:126588295-126593436  | 59.8247   | 56.8666  | -0.0732 | 0.216106 |
| <i>Acad11</i>         | chr9:104040661-104127463  | 7.0712    | 6.3911   | -0.1459 | 0.145799 |
| <i>Slc25a25</i>       | chr2:32414486-32451445    | 10.2282   | 9.5368   | -0.1010 | 0.119626 |
| <i>Ppm1l</i>          | chr3:69316860-69560802    | 1.0690    | 0.9199   | -0.2168 | 0.176539 |
| <i>Usp5</i>           | chr6:124815018-124829484  | 29.4093   | 27.7393  | -0.0843 | 0.123664 |
| <i>Gm22249</i>        | chr5:38546457-38546593    | 33.4245   | 26.6164  | -0.3286 | 0.152684 |
| <i>Oas1a</i>          | chr5:120896255-120907521  | 3.9514    | 6.7367   | 0.7697  | 0.169011 |
| <i>Sbno1</i>          | chr5:124368701-124425914  | 30.2087   | 32.5087  | 0.1059  | 0.052340 |
| <i>Zfp646</i>         | chr7:127876795-127885996  | 44.8495   | 42.2610  | -0.0858 | 0.238924 |
| <i>Thap11</i>         | chr8:105855102-105856950  | 18.9227   | 17.3098  | -0.1285 | 0.129603 |
| <i>Dpagt1</i>         | chr9:44326844-44333600    | 4.6943    | 5.5956   | 0.2534  | 0.092947 |
| <i>Rpp21</i>          | chr17:36255644-36258069   | 29.6062   | 26.4483  | -0.1627 | 0.233984 |
| <i>Gm26224</i>        | chr1:161035393-161035473  | 120.6286  | 104.5886 | -0.2058 | 0.109418 |
| <i>Tomm40l</i>        | chr1:171217801-171222514  | 11.3830   | 10.3716  | -0.1342 | 0.211659 |
| <i>Rabepk</i>         | chr2:3477555-34799912     | 7.4550    | 6.8311   | -0.1261 | 0.123682 |
| <i>Slc28a2</i>        | chr2:122426476-122461137  | 50.7198   | 47.5668  | -0.0926 | 0.185536 |
| <i>Slc35c2</i>        | chr2:165276553-165287869  | 9.2532    | 8.4680   | -0.1279 | 0.158919 |
| <i>Cab39</i>          | chr1:85793440-85851576    | 112.3857  | 105.6098 | -0.0897 | 0.177045 |
| <i>6030443J06Rik</i>  | chr5:22550436-22807850    | 0.6539    | 0.5352   | -0.2891 | 0.071915 |
| <i>Mpdu1</i>          | chr11:69656696-69662642   | 20.4997   | 18.7100  | -0.1318 | 0.186778 |

|                  |                           |          |          |         |          |
|------------------|---------------------------|----------|----------|---------|----------|
| <i>Pgls</i>      | chr8:71592175-71601092    | 12.8121  | 11.5939  | -0.1441 | 0.251103 |
| <i>Bdh1</i>      | chr16:31422279-31458901   | 15.4335  | 14.0093  | -0.1397 | 0.239773 |
| <i>Plekhn1</i>   | chr4:156221455-156228542  | 7.9676   | 6.9181   | -0.2038 | 0.249474 |
| <i>Mttrn10</i>   | chr7:64287652-64340407    | 2.8723   | 3.2711   | 0.1876  | 0.103505 |
| <i>Lzts1</i>     | chr8:69135502-69140953    | 4.8188   | 4.0955   | -0.2346 | 0.142039 |
| <i>Gm26694</i>   | chr17:25794893-25964784   | 8.6927   | 7.7059   | -0.1738 | 0.172548 |
| <i>Sos1</i>      | chr17:80393751-80480453   | 5.5412   | 6.3370   | 0.1936  | 0.225589 |
| <i>Pfkl</i>      | chr10:77986946-78010083   | 17.8266  | 16.4625  | -0.1148 | 0.214644 |
| <i>Acp6</i>      | chr3:97158776-97176574    | 8.7760   | 8.1423   | -0.1081 | 0.106046 |
| <i>Mybbp1a</i>   | chr11:72441354-72451768   | 24.6864  | 26.9952  | 0.1290  | 0.076293 |
| <i>Ankmy2</i>    | chr12:36157123-36197291   | 29.7357  | 27.3206  | -0.1222 | 0.202037 |
| <i>Irf4</i>      | chr13:30749225-30766927   | 4.8305   | 6.0409   | 0.3226  | 0.316607 |
| <i>Icos</i>      | chr1:60977926-61000320    | 21.0164  | 28.5686  | 0.4429  | 0.211183 |
| <i>Tnf</i>       | chr17:35199380-35202007   | 23.3936  | 26.1994  | 0.1634  | 0.092614 |
| <i>Snord22</i>   | chr19:8725865-8725991     | 93.4557  | 119.6790 | 0.3568  | 0.316548 |
| <i>Syne3</i>     | chr12:104929948-105009809 | 3.9637   | 4.7404   | 0.2582  | 0.236592 |
| <i>Tfdp1</i>     | chr8:13339673-13377702    | 14.5348  | 13.1234  | -0.1474 | 0.140532 |
| <i>Phf11b</i>    | chr14:59320963-59341335   | 29.6746  | 34.4225  | 0.2141  | 0.207245 |
| <i>Rc3h1</i>     | chr1:160906417-160974978  | 18.5382  | 21.0123  | 0.1807  | 0.221156 |
| <i>Thns1</i>     | chr2:21205723-21215009    | 2.3379   | 2.7323   | 0.2249  | 0.029058 |
| <i>Gzf1</i>      | chr2:148681022-148692949  | 7.2594   | 8.0813   | 0.1547  | 0.048431 |
| <i>Trmt6</i>     | chr2:132804206-132816055  | 9.9415   | 11.0781  | 0.1562  | 0.112907 |
| <i>Coq2</i>      | chr5:100654722-100675140  | 13.7560  | 12.3852  | -0.1514 | 0.257250 |
| <i>Mettl4</i>    | chr17:94727079-94749892   | 17.3927  | 15.9100  | -0.1285 | 0.138113 |
| <i>Agl</i>       | chr3:116739998-116808166  | 1.2225   | 1.4790   | 0.2748  | 0.243602 |
| <i>Zmym4</i>     | chr4:126861938-126968135  | 11.8758  | 13.0926  | 0.1407  | 0.124316 |
| <i>Ahdc1</i>     | chr4:133011259-133078110  | 2.6761   | 3.2490   | 0.2799  | 0.295682 |
| <i>Med17</i>     | chr9:15260351-15279867    | 19.3097  | 17.9619  | -0.1044 | 0.146761 |
| <i>Rreb1</i>     | chr13:37778399-37952002   | 2.8129   | 3.3219   | 0.2400  | 0.269127 |
| <i>Arhgap29</i>  | chr3:121953228-122016677  | 3.5106   | 4.2705   | 0.2827  | 0.227920 |
| <i>Slc9a1</i>    | chr4:133369705-133423702  | 4.0168   | 4.7755   | 0.2496  | 0.255091 |
| <i>Zfp770</i>    | chr2:114193460-114201469  | 4.3182   | 4.8716   | 0.1740  | 0.100909 |
| <i>Tbrg1</i>     | chr9:37649181-37657312    | 40.6844  | 38.0727  | -0.0957 | 0.169365 |
| <i>Ddx60</i>     | chr8:61928086-62037701    | 15.6804  | 18.7595  | 0.2587  | 0.302013 |
| <i>D10Jhu81e</i> | chr10:78162066-78169768   | 34.6041  | 31.5840  | -0.1317 | 0.209141 |
| <i>Ctu1</i>      | chr7:43672015-43678298    | 7.1127   | 6.3821   | -0.1564 | 0.132216 |
| <i>H2-Oa</i>     | chr17:34092339-34095234   | 5.1861   | 6.2636   | 0.2723  | 0.103203 |
| <i>Gm16365</i>   | chr10:39558495-39613682   | 2.8478   | 3.6416   | 0.3547  | 0.096717 |
| <i>Arrdc1</i>    | chr2:24925351-24935252    | 39.1490  | 37.2188  | -0.0729 | 0.054111 |
| <i>B4galnt4</i>  | chr7:141061273-141072119  | 1.8392   | 3.4101   | 0.8907  | 0.212973 |
| <i>Serpinc6a</i> | chr13:33917917-34002794   | 6.0878   | 6.8299   | 0.1659  | 0.120364 |
| <i>Gm16279</i>   | chr17:35896945-35912215   | 2.9938   | 2.5657   | -0.2227 | 0.142281 |
| <i>Trim11</i>    | chr11:58978062-58991458   | 31.2984  | 29.6756  | -0.0768 | 0.133704 |
| <i>Dnmt3a</i>    | chr12:3806006-3914443     | 7.3267   | 8.0715   | 0.1397  | 0.106784 |
| <i>Cacul1</i>    | chr19:60524695-60581023   | 16.1823  | 15.0772  | -0.1021 | 0.197141 |
| <i>Sf3b2</i>     | chr19:5273922-5295455     | 125.9400 | 120.4550 | -0.0642 | 0.087168 |
| <i>Kbtbd8</i>    | chr6:95117239-95129718    | 6.8957   | 6.3625   | -0.1161 | 0.092989 |
| <i>Gpr174</i>    | chrX:107255877-107296769  | 25.2186  | 27.7505  | 0.1380  | 0.105237 |
| <i>Ndufa8</i>    | chr2:36036325-36049406    | 42.1201  | 37.7542  | -0.1579 | 0.236425 |
| <i>Hnrnpab</i>   | chr11:51600099-51606847   | 109.1140 | 103.3226 | -0.0787 | 0.181618 |
| <i>Gimap8</i>    | chr6:48647233-48660875    | 240.3266 | 227.6081 | -0.0784 | 0.206302 |
| <i>Leng1</i>     | chr7:3660097-3665840      | 15.2782  | 13.9368  | -0.1326 | 0.161162 |
| <i>Hsh2d</i>     | chr8:72189667-72200995    | 20.4273  | 23.7014  | 0.2145  | 0.196749 |
| <i>Slc25a12</i>  | chr2:71271062-71367749    | 17.1543  | 16.1701  | -0.0852 | 0.126116 |
| <i>Arfgap1</i>   | chr2:180967224-180982526  | 18.0900  | 16.9296  | -0.0956 | 0.228092 |
| <i>Zfp513</i>    | chr5:31198980-31202303    | 14.3584  | 13.1494  | -0.1269 | 0.205138 |
| <i>Stub1</i>     | chr17:25830635-25833361   | 55.8273  | 52.6841  | -0.0836 | 0.121396 |
| <i>Fli1</i>      | chr9:32422207-32541389    | 74.3317  | 69.5034  | -0.0969 | 0.194823 |
| <i>Gm26841</i>   | chr2:152694732-152696692  | 17.4366  | 15.7144  | -0.1500 | 0.204013 |
| <i>Vps37b</i>    | chr5:124004640-124032260  | 59.2608  | 65.5428  | 0.1454  | 0.139374 |
| <i>Irf7</i>      | chr7:141262705-141266481  | 39.2808  | 51.5311  | 0.3916  | 0.169135 |
| <i>Stx11</i>     | chr10:12939982-12964259   | 3.9759   | 6.8683   | 0.7887  | 0.238979 |
| <i>Nmb</i>       | chr7:80902226-80905076    | 5.9336   | 7.3932   | 0.3173  | 0.099344 |
| <i>Sec23b</i>    | chr2:144556228-144590749  | 14.0524  | 13.2077  | -0.0894 | 0.109332 |
| <i>Hnrnpd</i>    | chr5:99958425-99978938    | 14.6130  | 16.4761  | 0.1731  | 0.215167 |
| <i>Ubqln2</i>    | chrX:153498231-153501537  | 3.9181   | 4.5986   | 0.2310  | 0.126443 |
| <i>Usp7</i>      | chr16:8689594-8792308     | 69.8910  | 66.5317  | -0.0711 | 0.188075 |
| <i>Trmt10c</i>   | chr16:56032608-56037819   | 30.6242  | 28.3622  | -0.1107 | 0.187073 |
| <i>Rad9b</i>     | chr5:122323222-122354233  | 14.5090  | 13.4744  | -0.1067 | 0.106262 |
| <i>Gapdh</i>     | chr6:125161714-125166467  | 5.8430   | 6.6671   | 0.1903  | 0.133642 |
| <i>Lpp</i>       | chr16:24393349-24992576   | 4.4511   | 5.1033   | 0.1973  | 0.260794 |

|                      |                           |          |           |         |          |
|----------------------|---------------------------|----------|-----------|---------|----------|
| <i>Kdelc1</i>        | chr1:44091462-44118808    | 2.6237   | 3.1305    | 0.2548  | 0.149934 |
| <i>Ormdl1</i>        | chr1:53297094-53310309    | 8.3013   | 7.4486    | -0.1564 | 0.247286 |
| <i>Ciao1</i>         | chr2:127240937-127247816  | 21.0606  | 19.7383   | -0.0935 | 0.133888 |
| <i>Mllt3</i>         | chr4:87769924-88033364    | 18.4759  | 20.1505   | 0.1252  | 0.065158 |
| <i>Faah</i>          | chr4:115967144-116017926  | 20.5764  | 22.7608   | 0.1456  | 0.173345 |
| <i>Ep400</i>         | chr5:110664372-110770717  | 15.9875  | 18.2740   | 0.1928  | 0.280744 |
| <i>Kmt2e</i>         | chr5:23434440-23504235    | 25.4858  | 28.1055   | 0.1412  | 0.180907 |
| <i>Clptm1</i>        | chr7:19631580-19665030    | 24.1820  | 22.8735   | -0.0803 | 0.167801 |
| <i>Odc1</i>          | chr12:17544872-17551502   | 8.4631   | 10.0733   | 0.2513  | 0.253223 |
| <i>Ifi2712a</i>      | chr12:103442166-103443680 | 338.1371 | 447.0548  | 0.4028  | 0.180783 |
| <i>Nkd2</i>          | chr13:73818533-73847631   | 1.4596   | 1.8884    | 0.3716  | 0.258712 |
| <i>Ggcx</i>          | chr6:72414307-72430712    | 6.4630   | 5.7809    | -0.1609 | 0.211560 |
| <i>Brpf1</i>         | chr6:113307180-113324857  | 16.5451  | 15.5829   | -0.0864 | 0.219021 |
| <i>Mctp2</i>         | chr7:72077831-72306595    | 15.4858  | 14.2437   | -0.1206 | 0.261252 |
| <i>Rps3</i>          | chr7:99477895-99483738    | 481.1283 | 430.6103  | -0.1600 | 0.296395 |
| <i>Pik3r4</i>        | chr9:105642994-105687655  | 11.8331  | 13.0141   | 0.1373  | 0.069398 |
| <i>Suv39h1</i>       | chrX:8061170-8074760      | 8.2451   | 7.7133    | -0.0962 | 0.030373 |
| <i>Nr1d2</i>         | chr14:18204053-18239127   | 8.2657   | 9.3515    | 0.1781  | 0.156914 |
| <i>Nfkbil1</i>       | chr17:35220174-35235792   | 8.8487   | 7.7561    | -0.1901 | 0.224878 |
| <i>Heg1</i>          | chr16:33684465-33771576   | 5.6791   | 6.4803    | 0.1904  | 0.252311 |
| <i>NA</i>            | chr1:91928784-91931176    | 7.1873   | 8.3241    | 0.2118  | 0.165670 |
| <i>Dap</i>           | chr15:31224384-31274338   | 11.0100  | 13.4028   | 0.2837  | 0.242218 |
| <i>Cdc34</i>         | chr10:79682194-79688394   | 33.9592  | 31.1940   | -0.1225 | 0.205700 |
| <i>Abcd4</i>         | chr12:84602530-84617466   | 5.4730   | 6.4644    | 0.2402  | 0.174347 |
| <i>Polr3g</i>        | chr13:81673842-81711013   | 6.7003   | 6.0868    | -0.1385 | 0.152490 |
| <i>Oas1b</i>         | chr5:120812634-120824163  | 17.1271  | 19.9401   | 0.2194  | 0.220251 |
| <i>Eif2ak3</i>       | chr6:70844514-70905245    | 12.2207  | 11.3984   | -0.1005 | 0.153499 |
| <i>Cd27</i>          | chr6:125232621-125237010  | 131.1131 | 125.3686  | -0.0646 | 0.144846 |
| <i>Gm21982</i>       | chr7:30641000-30664937    | 25.6522  | 23.9474   | -0.0992 | 0.214079 |
| <i>Il18bp</i>        | chr7:102015078-102018155  | 9.2815   | 11.3156   | 0.2859  | 0.283017 |
| <i>Stt3b</i>         | chr9:115242606-115310421  | 62.4175  | 58.9330   | -0.0829 | 0.227059 |
| <i>Asb8</i>          | chr15:98134636-98165625   | 10.1669  | 11.3481   | 0.1586  | 0.028806 |
| <i>Gm17233</i>       | chr14:73173819-73187321   | 10.7558  | 9.1023    | -0.2408 | 0.152929 |
| <i>Cdc45</i>         | chr16:18780446-18811987   | 1.8805   | 2.3467    | 0.3195  | 0.108418 |
| <i>Atp6v1a</i>       | chr16:44085401-44139705   | 10.5724  | 9.6517    | -0.1315 | 0.226921 |
| <i>Cggbp1</i>        | chr16:64851995-64859507   | 51.4796  | 48.2505   | -0.0935 | 0.220427 |
| <i>Taf5</i>          | chr19:47067747-47083479   | 12.6721  | 11.8270   | -0.0996 | 0.038542 |
| <i>Mfsd4</i>         | chr1:132022805-132068062  | 17.5423  | 19.5476   | 0.1562  | 0.173193 |
| <i>2610002M06Rik</i> | chrX:107782750-107816334  | 7.6056   | 7.1034    | -0.0985 | 0.051096 |
| <i>Tars</i>          | chr15:11383662-11399658   | 46.1451  | 43.6884   | -0.0789 | 0.099738 |
| <i>Zfp664</i>        | chr5:124862690-124902693  | 8.6081   | 9.7917    | 0.1859  | 0.195880 |
| <i>Smg6</i>          | chr11:74925822-75164448   | 13.0990  | 14.4051   | 0.1371  | 0.149217 |
| <i>Mrpl36</i>        | chr13:73331008-73332175   | 28.6061  | 24.9946   | -0.1947 | 0.248147 |
| <i>Dda1</i>          | chr8:71469198-71476098    | 21.4846  | 19.9102   | -0.1098 | 0.235026 |
| <i>Psd</i>           | chr19:46312086-46327156   | 1.2554   | 1.5351    | 0.2902  | 0.046456 |
| <i>Sfmbt2</i>        | chr2:10370509-10595253    | 4.1587   | 3.7757    | -0.1394 | 0.271545 |
| <i>Pde4dip</i>       | chr3:97689823-97888707    | 5.8199   | 5.4188    | -0.1030 | 0.198640 |
| <i>Nptn</i>          | chr9:58582239-58657955    | 15.3728  | 16.7773   | 0.1261  | 0.080761 |
| <i>Arhgap9</i>       | chr10:127323726-127329943 | 133.5581 | 126.7624  | -0.0753 | 0.172229 |
| <i>Mrpl22</i>        | chr11:58171660-58179565   | 11.3719  | 9.8885    | -0.2016 | 0.138520 |
| <i>Nsmce1</i>        | chr7:125467639-125491596  | 38.3340  | 33.5107   | -0.1940 | 0.310425 |
| <i>Slx1b</i>         | chr7:126689467-126695784  | 6.8281   | 6.1951    | -0.1404 | 0.149791 |
| <i>Gm23935</i>       | chr16:11144124-11144181   | 931.7258 | 1505.8103 | 0.6926  | 0.176794 |
| <i>Dock8</i>         | chr19:24999528-25202432   | 68.6870  | 75.6384   | 0.1391  | 0.181954 |
| <i>Abcf3</i>         | chr16:20548576-20561379   | 29.5952  | 27.7922   | -0.0907 | 0.142877 |
| <i>Chaf1b</i>        | chr16:93883900-93906115   | 5.3208   | 4.8337    | -0.1385 | 0.175036 |
| <i>Ttc4</i>          | chr4:106662255-106678944  | 21.0808  | 19.8031   | -0.0902 | 0.113596 |
| <i>H2-T24</i>        | chr17:36005694-36020560   | 69.6985  | 81.3167   | 0.2224  | 0.285313 |
| <i>Mst1</i>          | chr9:108080435-108085027  | 4.0907   | 4.8244    | 0.2380  | 0.095159 |
| <i>Ylpm1</i>         | chr12:84996320-85070515   | 5.4432   | 6.4239    | 0.2390  | 0.325308 |
| <i>Arpc4</i>         | chr6:113378112-113390448  | 76.0542  | 70.2786   | -0.1139 | 0.230954 |
| <i>Vps33b</i>        | chr7:80269648-80291579    | 16.2969  | 15.2142   | -0.0992 | 0.111413 |
| <i>Spryd3</i>        | chr15:102116527-102136234 | 14.4267  | 13.3778   | -0.1089 | 0.157668 |
| <i>Blzf1</i>         | chr1:164289799-164307489  | 4.3755   | 4.9459    | 0.1768  | 0.085540 |
| <i>Cenpb</i>         | chr2:131177290-131180012  | 29.1408  | 26.1863   | -0.1542 | 0.316395 |
| <i>Pxn</i>           | chr5:115506675-115555987  | 9.9857   | 9.4411    | -0.0809 | 0.115160 |
| <i>Ccdc142</i>       | chr6:83101616-83109939    | 12.2941  | 11.3601   | -0.1140 | 0.165691 |
| <i>Oaz1-ps</i>       | chr17:17345455-17346140   | 11.1516  | 9.4484    | -0.2391 | 0.165449 |
| <i>Cd46</i>          | chr1:195041284-195092248  | 3.1440   | 2.7317    | -0.2028 | 0.143769 |
| <i>Srsf12</i>        | chr4:33208990-33233340    | 2.1258   | 1.7944    | -0.2445 | 0.077401 |
| <i>Rtfdc1</i>        | chr2:172440555-172469908  | 38.4882  | 36.4304   | -0.0793 | 0.106916 |

|                |                           |          |          |         |          |
|----------------|---------------------------|----------|----------|---------|----------|
| NA             | chr6:136608858-136610870  | 12.9077  | 15.0523  | 0.2218  | 0.265017 |
| Ly6e           | chr15:74955050-74959905   | 141.6215 | 158.4019 | 0.1615  | 0.220134 |
| Tmem63a        | chr1:180942343-180975112  | 17.5025  | 16.4738  | -0.0874 | 0.197571 |
| Gpsm2          | chr3:108678637-108722187  | 9.1601   | 8.3767   | -0.1290 | 0.141386 |
| Tmem245        | chr4:56866922-56947437    | 5.2857   | 5.9644   | 0.1743  | 0.235014 |
| Gm13012        | chr4:137882369-137883937  | 8.4564   | 10.1394  | 0.2619  | 0.090135 |
| Gm15522        | chr5:34650717-34652477    | 6.6680   | 8.0876   | 0.2785  | 0.028739 |
| Trex1          | chr9:109057932-109060338  | 33.4604  | 37.4944  | 0.1642  | 0.149111 |
| D730003115Rik  | chr1:191224473-191225686  | 11.9920  | 9.6773   | -0.3094 | 0.273635 |
| Sqle           | chr15:59315076-59331192   | 7.2638   | 6.3247   | -0.1997 | 0.320242 |
| Ccdc53         | chr10:88201092-88246158   | 13.3448  | 11.9245  | -0.1624 | 0.282481 |
| E130012A19Rik  | chr11:97627392-97629716   | 2.1747   | 1.7942   | -0.2775 | 0.106383 |
| Plekhg2        | chr7:28359603-28372599    | 17.6489  | 20.1759  | 0.1931  | 0.259484 |
| Cep152         | chr2:125563087-125625113  | 10.3342  | 9.5145   | -0.1192 | 0.230128 |
| R74862         | chr7:143021783-143053686  | 1.9655   | 2.3234   | 0.2414  | 0.031615 |
| Rpl23a         | chr11:78180931-78183584   | 8.8998   | 7.5272   | -0.2417 | 0.139213 |
| Chst12         | chr5:140505549-140525724  | 6.5957   | 5.7193   | -0.2057 | 0.289320 |
| Timm10         | chr2:84826996-84830213    | 12.6828  | 11.1393  | -0.1872 | 0.082541 |
| Lrch1          | chr14:74754673-74947877   | 17.8390  | 19.2317  | 0.1085  | 0.002841 |
| Mrfap1         | chr5:36794866-36796772    | 30.7072  | 28.5068  | -0.1073 | 0.140065 |
| Trav15-1-dv6-1 | chr14:53559675-53560247   | 13.8569  | 11.6046  | -0.2559 | 0.000976 |
| Ifit3          | chr19:34583530-34588731   | 15.4911  | 26.5512  | 0.7773  | 0.174397 |
| Fam73b         | chr2:30364232-30385521    | 3.2470   | 2.9084   | -0.1589 | 0.201250 |
| Iffo2          | chr4:139530547-139620382  | 7.6094   | 7.1006   | -0.0998 | 0.129183 |
| Spsb3          | chr17:24886642-24892152   | 25.1745  | 23.4073  | -0.1050 | 0.251734 |
| Gm20721        | chr2:174330318-174346712  | 145.7977 | 160.2322 | 0.1362  | 0.129383 |
| Iscu           | chr5:113772747-113778288  | 9.2875   | 7.9966   | -0.2159 | 0.248617 |
| Cstf2          | chrX:134059186-134086819  | 13.0805  | 12.4104  | -0.0759 | 0.090136 |
| Sumo2          | chr11:115523101-115536276 | 3.9279   | 4.6580   | 0.2459  | 0.031832 |
| Ptxnd1         | chr6:115954810-115995005  | 1.2470   | 1.4899   | 0.2568  | 0.123535 |
| Rbm42          | chr7:30640993-30650317    | 36.8310  | 34.2724  | -0.1039 | 0.230324 |
| Mthfsd         | chr8:121095011-121108392  | 8.4466   | 7.7828   | -0.1181 | 0.199961 |
| Pdcd4          | chr19:53892230-53929861   | 139.9833 | 157.1134 | 0.1666  | 0.191689 |
| Trp53bp1       | chr2:121193280-121271407  | 9.3954   | 10.1176  | 0.1068  | 0.041217 |
| Eva1b          | chr4:126147743-126149875  | 11.3565  | 10.3223  | -0.1378 | 0.140042 |
| Rfesd          | chr13:76001534-76018712   | 6.7329   | 7.9216   | 0.2346  | 0.204960 |
| Chmp2a         | chr7:13032005-13034777    | 120.6139 | 109.6517 | -0.1375 | 0.273102 |
| Col11a2        | chr17:34039436-34066685   | 5.4948   | 4.6594   | -0.2379 | 0.358701 |
| Asna1          | chr8:85017933-85025278    | 36.8215  | 33.3795  | -0.1416 | 0.244186 |
| Dctd           | chr8:48099091-48153233    | 1.5158   | 1.2551   | -0.2723 | 0.124252 |
| Ostm1          | chr10:42583821-42702459   | 14.3383  | 13.5139  | -0.0854 | 0.155459 |
| Anxa2          | chr9:69453619-69491795    | 7.6469   | 10.7043  | 0.4852  | 0.233301 |
| Cep350         | chr1:155844965-155972890  | 22.8715  | 25.2601  | 0.1433  | 0.192430 |
| NA             | chr1:167223826-167223919  | 55.5139  | 46.2579  | -0.2632 | 0.101212 |
| Lig3           | chr11:82781107-82804274   | 14.2687  | 13.5169  | -0.0781 | 0.148361 |
| Rev3l          | chr10:39732117-39875211   | 17.5012  | 19.1242  | 0.1279  | 0.124650 |
| Fanca          | chr8:123268299-123318576  | 2.0304   | 1.8132   | -0.1633 | 0.175268 |
| Ncaph          | chr2:127103808-127133954  | 1.8195   | 2.2928   | 0.3335  | 0.266624 |
| Tardbp         | chr4:148612381-148627019  | 40.2222  | 43.6259  | 0.1172  | 0.079573 |
| Gm16033        | chr11:46143782-46147116   | 7.2371   | 9.3792   | 0.3741  | 0.221648 |
| Gm11583        | chr11:97160989-97161675   | 48.6901  | 43.2724  | -0.1702 | 0.244954 |
| Dnajc27        | chr12:4082573-4110612     | 5.9237   | 5.4551   | -0.1189 | 0.118736 |
| Grhl1          | chr12:24572286-24617391   | 0.9453   | 1.4482   | 0.6154  | 0.362070 |
| Psen1          | chr12:83688202-83735199   | 26.1190  | 28.5055  | 0.1261  | 0.081741 |
| Tapt1          | chr5:44175163-44226606    | 53.4245  | 50.6568  | -0.0767 | 0.200616 |
| Ccr2           | chr9:124101949-124113557  | 2.1624   | 3.9277   | 0.8611  | 0.216057 |
| Nupl1          | chr14:60219203-60251507   | 36.0050  | 34.0542  | -0.0804 | 0.104210 |
| E230001N04Rik  | chr17:28523256-28525347   | 9.6566   | 8.7746   | -0.1382 | 0.076537 |
| Nek7           | chr1:138484713-138619696  | 38.5422  | 42.7243  | 0.1486  | 0.187895 |
| 1700034H15Rik  | chr1:191890232-191907527  | 0.9219   | 0.7099   | -0.3769 | 0.282868 |
| Cc2d1b         | chr4:108619939-108634123  | 37.9333  | 36.3643  | -0.0609 | 0.065152 |
| B230219D22Rik  | chr13:55693123-55703499   | 39.8583  | 38.0969  | -0.0652 | 0.074239 |
| Palm3          | chr8:84021470-84030295    | 11.5994  | 13.4267  | 0.2111  | 0.252266 |
| Nyap1          | chr5:137730882-137741607  | 1.5864   | 1.3081   | -0.2783 | 0.266239 |
| Lime1          | chr2:181380077-181383628  | 114.1348 | 106.5400 | -0.0993 | 0.256052 |
| Poll           | chr19:45552274-45560531   | 7.8066   | 7.0505   | -0.1470 | 0.116975 |
| Neu3           | chr7:99811438-99828417    | 4.3299   | 5.1626   | 0.2538  | 0.241487 |
| Traj37         | chr14:54181517-54181577   | 108.9905 | 131.2607 | 0.2682  | 0.115945 |
| Pxylp1         | chr9:96823343-96892669    | 6.7266   | 6.0395   | -0.1555 | 0.235517 |
| Etfb           | chr7:43444107-43457800    | 10.8798  | 13.0208  | 0.2592  | 0.214669 |
| Rbm41          | chrX:139889510-139998595  | 5.4803   | 6.1395   | 0.1639  | 0.121057 |

|               |                           |          |          |         |          |
|---------------|---------------------------|----------|----------|---------|----------|
| Sp3           | chr2:72936426-72980446    | 112.1606 | 105.0326 | -0.0947 | 0.239101 |
| Gm26765       | chr10:91149514-91150594   | 30.7482  | 27.9807  | -0.1361 | 0.097708 |
| Sclt1         | chr3:41626716-41742514    | 2.3587   | 2.6746   | 0.1814  | 0.065468 |
| Slx4ip        | chr2:136891217-137071950  | 2.5190   | 2.8594   | 0.1829  | 0.033495 |
| Amer1         | chrX:95420317-95444872    | 5.5018   | 6.0596   | 0.1393  | 0.061778 |
| Cr1l          | chr1:195103788-195131570  | 50.4385  | 47.7351  | -0.0795 | 0.106245 |
| Fam222b       | chr11:78094659-78156700   | 3.3524   | 4.0748   | 0.2815  | 0.242583 |
| Gm16565       | chr1:165781074-165789367  | 16.3099  | 18.5397  | 0.1849  | 0.216770 |
| Apip          | chr2:103073674-103092644  | 7.3112   | 6.2063   | -0.2364 | 0.122162 |
| Pcnt          | chr10:76351253-76442912   | 26.4737  | 24.7982  | -0.0943 | 0.290074 |
| Scap          | chr9:110333287-110384946  | 22.0709  | 20.4517  | -0.1099 | 0.309706 |
| Klk8          | chr7:43797576-43803822    | 12.3083  | 15.5778  | 0.3399  | 0.304795 |
| Gm20470       | chr10:7743519-7761099     | 48.4731  | 43.2209  | -0.1655 | 0.121030 |
| Fam98c        | chr7:29152510-29156234    | 16.1334  | 15.0214  | -0.1030 | 0.161366 |
| Cxcr3         | chrX:101731534-101734269  | 12.7515  | 22.2291  | 0.8018  | 0.235575 |
| Tmem2         | chr19:21778341-21858327   | 1.6140   | 2.5382   | 0.6532  | 0.247533 |
| Trio          | chr15:27730651-28025848   | 7.4863   | 8.2327   | 0.1371  | 0.148087 |
| Dhcr24        | chr4:106561037-106589113  | 7.7803   | 6.9591   | -0.1609 | 0.287139 |
| Nampt         | chr12:32820334-32853369   | 16.5883  | 18.4667  | 0.1548  | 0.178154 |
| Bms1          | chr6:118383382-118419417  | 39.2171  | 37.5511  | -0.0626 | 0.051508 |
| Frm4a         | chr2:4017716-4614043      | 0.1691   | 0.2145   | 0.3437  | 0.148500 |
| Lgals9        | chr11:78962973-78984946   | 23.4903  | 26.3603  | 0.1663  | 0.144186 |
| Gm20069       | chr12:102612679-102618516 | 17.5143  | 15.0631  | -0.2175 | 0.168057 |
| Inf2          | chr12:112588783-112615556 | 3.2183   | 3.8710   | 0.2664  | 0.253544 |
| Erb2ip        | chr13:103818786-103920514 | 81.5980  | 88.2492  | 0.1130  | 0.076549 |
| Tecpr1        | chr5:144194441-144223615  | 59.3058  | 56.0189  | -0.0823 | 0.269222 |
| Msmo1         | chr8:64718138-64733792    | 10.0311  | 8.9353   | -0.1669 | 0.306392 |
| BC065403      | chr9:72361734-72409943    | 13.1222  | 14.9811  | 0.1911  | 0.031987 |
| Topbp1        | chr9:103305214-103350432  | 36.9599  | 35.0359  | -0.0771 | 0.240920 |
| Epm2aip1      | chr9:111271844-111279089  | 22.7739  | 20.9742  | -0.1188 | 0.283739 |
| Apobec2       | chr17:48419230-48432728   | 3.3182   | 4.3274   | 0.3831  | 0.277496 |
| Gtf2f1        | chr17:57003404-57011288   | 49.6309  | 46.4685  | -0.0950 | 0.196880 |
| Arl2          | chr19:6134373-6141406     | 6.6267   | 5.9655   | -0.1517 | 0.146109 |
| Hspd1         | chr1:55077834-55088243    | 22.7505  | 20.5848  | -0.1443 | 0.259890 |
| Dnajb2        | chr1:75236464-75244804    | 8.8506   | 7.6991   | -0.2011 | 0.208850 |
| Gm25395       | chr1:87776937-87777209    | 530.0796 | 465.7672 | -0.1866 | 0.336369 |
| Gm10521       | chr1:171895663-171898237  | 4.6563   | 5.4875   | 0.2370  | 0.128421 |
| Rbm43         | chr2:51924447-51935163    | 19.7702  | 18.4031  | -0.1034 | 0.169780 |
| Rps21         | chr2:180257376-180258445  | 172.3788 | 149.4508 | -0.2059 | 0.330764 |
| Smad1         | chr8:79338394-79399518    | 5.6784   | 5.1724   | -0.1346 | 0.247521 |
| Adams10       | chr17:33524203-33553782   | 38.7208  | 35.8641  | -0.1106 | 0.307056 |
| Btbd11        | chr10:85386813-85660292   | 2.1784   | 2.5395   | 0.2213  | 0.218583 |
| Gm10390       | chr5:120121102-120139263  | 2.9182   | 2.6627   | -0.1322 | 0.188434 |
| Sesn3         | chr9:14276300-14326138    | 52.3612  | 58.2339  | 0.1534  | 0.206023 |
| Zbtb33        | chrX:38189792-38197046    | 4.5413   | 5.0607   | 0.1563  | 0.024232 |
| Alkbh7        | chr17:56997338-56999322   | 9.9319   | 8.7562   | -0.1818 | 0.047458 |
| Gpatch11      | chr17:78835515-78848299   | 10.9037  | 10.0807  | -0.1132 | 0.159569 |
| Mettl18       | chr1:163994888-163997243  | 9.0180   | 10.6289  | 0.2371  | 0.210494 |
| Rpusd2        | chr2:119034789-119039769  | 4.0820   | 3.5940   | -0.1837 | 0.139702 |
| Trnau1ap      | chr4:132311762-132329538  | 12.9538  | 11.9845  | -0.1122 | 0.106971 |
| 9930012K11Rik | chr14:70154404-70159502   | 5.3481   | 4.7212   | -0.1799 | 0.176979 |
| Mycbp         | chr4:123904831-123912269  | 7.5726   | 6.8473   | -0.1453 | 0.144919 |
| Cnot7         | chr8:40492539-40515847    | 17.2252  | 16.4107  | -0.0699 | 0.054942 |
| Cd96          | chr16:46035656-46120251   | 107.6100 | 101.6827 | -0.0817 | 0.217390 |
| Shmt2         | chr10:127517122-127522444 | 27.7716  | 25.5222  | -0.1219 | 0.279245 |
| Tor1b         | chr2:30952958-30959015    | 24.6587  | 23.3122  | -0.0810 | 0.201019 |
| Arl15         | chr13:113794504-114157461 | 4.1470   | 4.8544   | 0.2272  | 0.142910 |
| Sel1l         | chr12:91806042-91849157   | 14.4851  | 15.9134  | 0.1357  | 0.166109 |
| Mat2a         | chr6:72432798-72439558    | 72.7058  | 66.5334  | -0.1280 | 0.332268 |
| Gm9888        | chr9:114780099-114782257  | 5.9471   | 5.0208   | -0.2443 | 0.086487 |
| Gm18828       | chr1:36764862-36765874    | 4.0884   | 5.2248   | 0.3538  | 0.207029 |
| Impa1         | chr3:10313539-10331439    | 19.7938  | 18.1661  | -0.1238 | 0.248614 |
| 1190007107Rik | chr10:82619850-82623196   | 7.1048   | 5.8583   | -0.2783 | 0.164242 |
| Mon1a         | chr9:107888128-107903125  | 12.3768  | 11.3329  | -0.1271 | 0.189773 |
| Ppia          | chr11:64154442-6419817    | 16.3042  | 18.0269  | 0.1449  | 0.105945 |
| Rcor3         | chr1:192098655-192138010  | 5.5776   | 6.2670   | 0.1681  | 0.069344 |
| Erp27         | chr6:136907310-136922180  | 1.4322   | 1.7977   | 0.3279  | 0.153777 |
| Ptges3        | chr10:128058953-128077272 | 10.5742  | 12.0670  | 0.1905  | 0.146816 |
| Gm12316       | chr11:70611211-70613211   | 11.1890  | 14.1765  | 0.3414  | 0.184253 |
| Adi1          | chr12:28675230-28682175   | 7.3510   | 8.5781   | 0.2227  | 0.130984 |
| Trbj1-3       | chr6:41534322-41534376    | 212.0604 | 243.0400 | 0.1967  | 0.026067 |

|                      |                           |          |          |         |          |
|----------------------|---------------------------|----------|----------|---------|----------|
| <i>Selk</i>          | chr14:29968307-29975074   | 14.5736  | 17.0145  | 0.2234  | 0.220770 |
| <i>Rpsud1</i>        | chr17:25727750-25731456   | 3.6231   | 3.0311   | -0.2574 | 0.169081 |
| <i>O610009E02Rik</i> | chr2:26445695-26459390    | 7.6425   | 9.4836   | 0.3114  | 0.315717 |
| <i>Mrqbp</i>         | chr2:180581303-180586304  | 24.3944  | 22.9692  | -0.0868 | 0.192849 |
| <i>Strip1</i>        | chr3:107612531-107631710  | 28.5056  | 26.9786  | -0.0794 | 0.201195 |
| <i>Gpr97</i>         | chr8:95017691-95045247    | 2.6185   | 2.2336   | -0.2294 | 0.085346 |
| <i>Gpr137b-ps</i>    | chr13:12619083-12650297   | 1.7290   | 2.0992   | 0.2799  | 0.079821 |
| <i>Akr1b3</i>        | chr6:34303933-34317497    | 6.8776   | 7.6414   | 0.1519  | 0.030909 |
| <i>Parp11</i>        | chr6:127446839-127494241  | 21.8510  | 20.4278  | -0.0972 | 0.246782 |
| <i>Rgs2</i>          | chr1:143999337-144004161  | 9.5450   | 11.0920  | 0.2167  | 0.252832 |
| <i>Abl2</i>          | chr1:156558785-156649568  | 9.8256   | 10.8684  | 0.1455  | 0.193266 |
| <i>Mrp11</i>         | chr19:4962305-4966995     | 9.0099   | 8.0487   | -0.1628 | 0.260920 |
| <i>Gm13008</i>       | chr4:136003565-136010937  | 17.8045  | 20.9161  | 0.2324  | 0.111000 |
| <i>Slmap</i>         | chr14:26413167-26534931   | 10.4302  | 11.7424  | 0.1710  | 0.248063 |
| <i>Glipr1</i>        | chr10:111985447-112002631 | 54.5618  | 49.4222  | -0.1427 | 0.274501 |
| <i>NA</i>            | chr12:87442682-87444017   | 11.7770  | 10.4315  | -0.1750 | 0.228120 |
| <i>Tpst2</i>         | chr5:112276690-112315361  | 30.3970  | 28.6327  | -0.0863 | 0.210516 |
| <i>Ccdc51</i>        | chr9:109082495-109093363  | 5.3443   | 4.6949   | -0.1869 | 0.187817 |
| <i>Zc3h6</i>         | chr2:128967401-129018563  | 9.9902   | 11.5248  | 0.2062  | 0.241521 |
| <i>Sf3b3</i>         | chr8:110810491-110846803  | 71.4173  | 68.5907  | -0.0583 | 0.119720 |
| <i>Tcof1</i>         | chr18:60813754-60848971   | 27.7537  | 31.4698  | 0.1813  | 0.257259 |
| <i>Acvr1b</i>        | chr15:101174103-101213678 | 19.8151  | 18.5351  | -0.0963 | 0.237197 |
| <i>Slc37a1</i>       | chr17:31295482-31350696   | 18.7923  | 17.3754  | -0.1131 | 0.301806 |
| <i>Abhd1</i>         | chr5:30950065-30955091    | 11.7538  | 13.2179  | 0.1694  | 0.078536 |
| <i>Pear1</i>         | chr3:87747889-87824306    | 2.0916   | 3.0005   | 0.5206  | 0.225506 |
| <i>Dtx3l</i>         | chr16:35926510-35939151   | 45.6250  | 50.5531  | 0.1480  | 0.201906 |
| <i>Pik3ip1</i>       | chr11:3330400-3342971     | 54.7483  | 52.0060  | -0.0741 | 0.217675 |
| <i>Unc50</i>         | chr1:37430169-37439124    | 27.4516  | 25.0395  | -0.1327 | 0.237544 |
| <i>Rfwd3</i>         | chr8:111270943-111300222  | 8.5526   | 7.9105   | -0.1126 | 0.212918 |
| <i>R3hcc1l</i>       | chr19:42518758-42592343   | 7.8248   | 8.5449   | 0.1270  | 0.047730 |
| <i>Strn4</i>         | chr7:16815888-16840931    | 15.8311  | 15.0666  | -0.0714 | 0.174556 |
| <i>Sumo3</i>         | chr10:77606096-77641543   | 20.5602  | 18.9146  | -0.1204 | 0.251876 |
| <i>Ldha</i>          | chr7:46841474-46855627    | 100.7369 | 93.9589  | -0.1005 | 0.248492 |
| <i>C2cd3</i>         | chr7:100372232-100470159  | 11.3945  | 12.6847  | 0.1547  | 0.226815 |
| <i>Ppp2r3a</i>       | chr9:101104991-101251832  | 2.3023   | 2.6347   | 0.1945  | 0.120491 |
| <i>Mical3</i>        | chr6:120931706-121003153  | 1.0258   | 1.2260   | 0.2572  | 0.117453 |
| <i>Manea</i>         | chr4:26324505-26346891    | 6.8516   | 7.5835   | 0.1464  | 0.071286 |
| <i>Os9</i>           | chr10:127094258-127121160 | 62.5641  | 59.2483  | -0.0786 | 0.286840 |
| <i>4931413K12Rik</i> | chr11:75589664-75594771   | 3.4911   | 4.5416   | 0.3795  | 0.276799 |
| <i>Tmem199</i>       | chr11:78507054-78512172   | 14.7574  | 13.4546  | -0.1333 | 0.210051 |
| <i>Rsad2</i>         | chr12:26442752-26456452   | 3.1505   | 5.2704   | 0.7423  | 0.176326 |
| <i>4833420G17Rik</i> | chr13:119462758-119486117 | 59.4278  | 56.2703  | -0.0788 | 0.203252 |
| <i>Nub1</i>          | chr5:24685814-24710555    | 56.3121  | 53.7158  | -0.0681 | 0.153639 |
| <i>Xpc</i>           | chr6:91489304-91515884    | 15.7700  | 15.0334  | -0.0690 | 0.050081 |
| <i>Cish</i>          | chr9:107296025-107302784  | 3.7182   | 4.3746   | 0.2345  | 0.221766 |
| <i>Cchcr1</i>        | chr17:35517099-35531015   | 0.9583   | 1.2282   | 0.3579  | 0.231557 |
| <i>Stx3</i>          | chr19:11775118-11819403   | 1.3113   | 1.5606   | 0.2511  | 0.034901 |
| <i>Marc2</i>         | chr1:184813067-184846451  | 15.7099  | 14.6996  | -0.0959 | 0.207997 |
| <i>Surf4</i>         | chr2:26920039-26933928    | 58.4359  | 55.8932  | -0.0642 | 0.102002 |
| <i>Myo1c</i>         | chr11:75650503-75673910   | 3.2161   | 3.9027   | 0.2792  | 0.315858 |
| <i>Ipo8</i>          | chr6:148770682-148831467  | 13.9491  | 13.1308  | -0.0872 | 0.237586 |
| <i>Kif4</i>          | chrX:100625736-100727214  | 0.8503   | 1.2207   | 0.5216  | 0.364626 |
| <i>Tmem9</i>         | chr1:136008218-136035030  | 7.2088   | 6.3023   | -0.1939 | 0.236995 |
| <i>Gm9968</i>        | chr16:43345886-43363666   | 1.7997   | 2.2433   | 0.3178  | 0.203596 |
| <i>Efr3a</i>         | chr15:65787033-65873816   | 29.8188  | 28.1898  | -0.0811 | 0.206006 |
| <i>Zmym5</i>         | chr14:56790584-56811716   | 12.6542  | 13.8614  | 0.1315  | 0.110923 |
| <i>Idc</i>           | chr19:37268742-37337852   | 13.8302  | 15.1091  | 0.1276  | 0.113150 |
| <i>Gimap4</i>        | chr6:48684548-48692060    | 935.3718 | 866.9969 | -0.1095 | 0.286014 |
| <i>Ifrd2</i>         | chr9:107587717-107593038  | 14.3272  | 13.1386  | -0.1249 | 0.171801 |
| <i>Airn</i>          | chr17:12741310-12860122   | 1.8964   | 2.3786   | 0.3269  | 0.217627 |
| <i>Cyb5b</i>         | chr8:107150660-10718470   | 30.3599  | 28.5036  | -0.0910 | 0.206140 |
| <i>Gm15564</i>       | chr16:35966751-35983230   | 5.4580   | 7.3742   | 0.4341  | 0.377938 |
| <i>Wdr5</i>          | chr2:27515156-27536535    | 18.0744  | 17.1138  | -0.0788 | 0.028101 |
| <i>Gna12</i>         | chr5:140758407-140830431  | 7.4929   | 8.5384   | 0.1884  | 0.205594 |
| <i>Nmnat1</i>        | chr4:149467571-149485202  | 2.1668   | 1.7964   | -0.2705 | 0.245217 |
| <i>Rgp1</i>          | chr4:43578714-43587487    | 9.7298   | 10.8022  | 0.1508  | 0.173810 |
| <i>Gss</i>           | chr2:155563180-155592810  | 2.4606   | 2.2158   | -0.1511 | 0.094787 |
| <i>Lsm12</i>         | chr11:102162496-102185296 | 12.8505  | 11.5989  | -0.1478 | 0.231509 |
| <i>Gm22988</i>       | chr11:69669634-69669778   | 25.5100  | 33.8670  | 0.4088  | 0.309529 |
| <i>Ost4</i>          | chr5:30905884-30907788    | 35.5500  | 31.4543  | -0.1766 | 0.316331 |
| <i>Ipo5</i>          | chr14:120911193-120948042 | 27.8785  | 26.7531  | -0.0594 | 0.012004 |

|               |                           |          |          |         |          |
|---------------|---------------------------|----------|----------|---------|----------|
| Zfp763        | chr17:33016862-33033402   | 6.4039   | 7.1184   | 0.1526  | 0.021039 |
| Myo1f         | chr17:33555718-33607764   | 5.9766   | 10.0764  | 0.7536  | 0.232723 |
| Suco          | chr1:161816111-161876661  | 29.2974  | 32.1178  | 0.1326  | 0.164665 |
| Arhgap15      | chr2:43748823-44395953    | 51.1285  | 54.6128  | 0.0951  | 0.037610 |
| Rars2         | chr4:34614956-34660167    | 12.6267  | 11.5487  | -0.1287 | 0.252620 |
| Gm26816       | chr8:110863228-110940314  | 5.3788   | 6.1588   | 0.1954  | 0.083372 |
| Phldb1        | chr9:44686303-44735198    | 0.7444   | 0.9674   | 0.3781  | 0.212800 |
| Ncoa1         | chr12:4247362-4477182     | 10.7157  | 11.8907  | 0.1501  | 0.188701 |
| Kdm8          | chr7:125444675-125462265  | 4.2313   | 3.6711   | -0.2049 | 0.184535 |
| 2610524H06Rik | chr5:114821934-114823468  | 9.2677   | 11.3396  | 0.2911  | 0.271959 |
| Tnfsf11       | chr14:78277444-78308043   | 4.7785   | 6.2087   | 0.3777  | 0.358637 |
| Gm24616       | chr16:23111616-23111755   | 72.1264  | 86.1042  | 0.2556  | 0.212069 |
| Rbm27         | chr18:42275352-42341542   | 17.2623  | 18.8458  | 0.1266  | 0.093843 |
| Ddx54         | chr5:120613129-120628590  | 43.4408  | 41.2949  | -0.0731 | 0.219005 |
| Mvb12a        | chr8:71542929-71548024    | 27.8506  | 25.3317  | -0.1368 | 0.228481 |
| D8Erd738e     | chr8:84246236-84249761    | 98.3894  | 90.2028  | -0.1253 | 0.247856 |
| Heatr3        | chr8:88137854-88172027    | 12.5270  | 11.8060  | -0.0855 | 0.080257 |
| Lactb         | chr9:66955392-66975484    | 12.8215  | 11.6267  | -0.1411 | 0.188618 |
| Gm16576       | chr15:79742697-79757394   | 1.0620   | 1.2908   | 0.2815  | 0.104125 |
| Fam160b2      | chr14:70583295-70599835   | 5.1309   | 5.9278   | 0.2083  | 0.210540 |
| Glo1          | chr17:30592865-30612659   | 14.3731  | 13.1891  | -0.1240 | 0.145569 |
| Ddb2          | chr2:91211571-91236982    | 56.0202  | 53.1629  | -0.0755 | 0.181692 |
| Notch2        | chr3:98013537-98150367    | 11.6369  | 13.2781  | 0.1903  | 0.312833 |
| mt-Tc         | chrM:5191-5257            | 416.2916 | 509.6927 | 0.2920  | 0.309842 |
| Mib2          | chr4:155654676-155669198  | 13.7380  | 12.6975  | -0.1136 | 0.279750 |
| Zfp128        | chr7:12881176-12893422    | 2.2611   | 2.7141   | 0.2634  | 0.183196 |
| Kdm6b         | chr11:69398507-69413675   | 3.0901   | 3.6620   | 0.2449  | 0.274574 |
| 4933426M11Rik | chr12:80790531-80880832   | 33.4695  | 31.1296  | -0.1046 | 0.338130 |
| Klhl7         | chr5:24100589-24161223    | 4.9385   | 5.5915   | 0.1791  | 0.077060 |
| Sidt2         | chr9:45937856-45955247    | 62.5372  | 59.4592  | -0.0728 | 0.290019 |
| Csrnp1        | chr9:119971165-119977250  | 17.1636  | 16.0280  | -0.0988 | 0.226831 |
| Eif3d         | chr15:77958997-77970824   | 103.2592 | 96.9764  | -0.0906 | 0.231595 |
| Rnf219        | chr14:104477533-104522666 | 6.4020   | 7.1535   | 0.1601  | 0.055516 |
| Trmt61b       | chr17:71557026-71598755   | 2.5145   | 2.1615   | -0.2183 | 0.112943 |
| Rae1          | chr2:173000116-173015739  | 33.5993  | 31.5221  | -0.0921 | 0.191608 |
| Nol6          | chr4:41114426-41124455    | 12.9108  | 11.9414  | -0.1126 | 0.295393 |
| Sde2          | chr1:180851150-180868097  | 17.2476  | 16.2559  | -0.0854 | 0.075323 |
| Arap2         | chr5:62602444-62766198    | 27.2745  | 29.4297  | 0.1097  | 0.077429 |
| Cux1          | chr5:136248134-136567490  | 6.8750   | 7.4344   | 0.1129  | 0.031704 |
| Ap3m2         | chr8:22787353-22805654    | 12.4239  | 11.5514  | -0.1051 | 0.182458 |
| Asah1         | chr8:41340196-41374773    | 12.5439  | 11.4961  | -0.1258 | 0.247383 |
| March2        | chr17:33685691-33718670   | 14.6391  | 13.7488  | -0.0905 | 0.174586 |
| Rbck1         | chr2:152316333-152332653  | 43.4615  | 41.1163  | -0.0800 | 0.271035 |
| Spdl1         | chr11:34809189-34833641   | 1.0364   | 1.3013   | 0.3285  | 0.156681 |
| Gm15787       | chr5:110154399-110176504  | 8.0449   | 7.3832   | -0.1238 | 0.171952 |
| Man2a2        | chr7:80349097-80371375    | 28.7234  | 26.9240  | -0.0933 | 0.295031 |
| Dync1li1      | chr9:114688789-114724302  | 36.5186  | 34.5671  | -0.0792 | 0.142292 |
| Ptxna3        | chrX:74329065-74344689    | 0.7384   | 0.8867   | 0.2640  | 0.071042 |
| Cnih1         | chr14:46775581-46788411   | 16.6489  | 18.9495  | 0.1867  | 0.181757 |
| Desi2         | chr1:178187416-178252598  | 17.3098  | 16.0743  | -0.1068 | 0.263429 |
| Pkp4          | chr2:59160849-59355208    | 5.9332   | 6.5994   | 0.1535  | 0.120643 |
| Otud7b        | chr3:96104526-96161129    | 6.6314   | 7.4347   | 0.1649  | 0.207880 |
| Cabin1        | chr10:75646109-75764357   | 18.2523  | 20.5479  | 0.1709  | 0.280187 |
| Wibg          | chr10:128747878-128766568 | 73.6106  | 68.1869  | -0.1104 | 0.284296 |
| Cct4          | chr11:22990518-23003780   | 68.5374  | 63.5914  | -0.1081 | 0.277750 |
| Cenpa         | chr5:30666776-30674827    | 7.3802   | 8.4723   | 0.1991  | 0.194435 |
| Rfc2          | chr5:134582689-134598328  | 30.1254  | 27.7657  | -0.1177 | 0.226215 |
| Ube4a         | chr9:44923130-44965600    | 14.2648  | 15.6861  | 0.1370  | 0.150287 |
| Rpl30         | chr15:34440504-34443640   | 42.5093  | 48.1725  | 0.1804  | 0.259504 |
| Il2rb         | chr15:78480552-78495066   | 27.2925  | 40.6983  | 0.5765  | 0.230845 |
| Rpp14         | chr14:8090077-8090554     | 26.3216  | 22.9414  | -0.1983 | 0.225870 |
| Decr2         | chr17:26081210-26090329   | 7.9748   | 7.1906   | -0.1493 | 0.143199 |
| Lrch3         | chr16:32914099-33015647   | 27.5434  | 29.6286  | 0.1053  | 0.034930 |
| N6amt1        | chr16:87354184-87368742   | 3.5783   | 4.1002   | 0.1964  | 0.180721 |
| Plcb3         | chr19:6953713-6969759     | 2.9623   | 3.4262   | 0.2099  | 0.134992 |
| Fen1          | chr19:10199131-10204169   | 12.7301  | 11.6307  | -0.1303 | 0.206804 |
| Rsrc1         | chr3:66981389-67358396    | 2.9281   | 3.2683   | 0.1586  | 0.151621 |
| Smg5          | chr3:88336259-88362337    | 44.0013  | 42.0630  | -0.0650 | 0.171071 |
| Sf3b4         | chr3:96172331-96177564    | 2.7658   | 3.3331   | 0.2692  | 0.100738 |
| Inpp5b        | chr4:124741849-124801511  | 36.6443  | 34.6389  | -0.0812 | 0.205652 |
| Unc5cl        | chr17:48454900-48539714   | 5.3175   | 6.3326   | 0.2521  | 0.242887 |



|                      |                           |          |          |         |          |
|----------------------|---------------------------|----------|----------|---------|----------|
| <i>Creld1</i>        | chr6:113483296-113493338  | 1.5196   | 1.2823   | -0.2449 | 0.143617 |
| <i>Tbl2</i>          | chr5:135149656-135163873  | 5.6882   | 5.1809   | -0.1348 | 0.305738 |
| <i>Glt8d2</i>        | chr10:82650432-82690650   | 1.0425   | 1.2457   | -0.2569 | 0.068890 |
| <i>Dcaf5</i>         | chr12:80335846-80436601   | 27.2323  | 25.9394  | -0.0702 | 0.243861 |
| <i>Hist1h4f</i>      | chr13:23551257-23551648   | 15.9037  | 24.4665  | 0.6214  | 0.261002 |
| <i>Ugdh</i>          | chr5:65413201-65435946    | 4.3843   | 4.8300   | 0.1397  | 0.019270 |
| <i>Rbm19</i>         | chr5:120116509-120197979  | 16.9259  | 15.9259  | -0.0879 | 0.133749 |
| <i>Slc44a2</i>       | chr9:21337827-21355025    | 150.9585 | 144.0369 | -0.0677 | 0.275831 |
| <i>Gstp1</i>         | chr19:4035410-4037912     | 12.2887  | 14.4764  | 0.2364  | 0.146574 |
| <i>AW112010</i>      | chr19:11047612-11050566   | 109.2728 | 142.5681 | 0.3837  | 0.244149 |
| <i>Hspe1</i>         | chr1:55088131-55091307    | 17.4522  | 15.0747  | -0.2113 | 0.298417 |
| <i>Soat1</i>         | chr1:156428107-156474328  | 17.6493  | 16.5821  | -0.0900 | 0.225118 |
| <i>Prpf6</i>         | chr2:181591867-181655660  | 34.9408  | 33.1262  | -0.0769 | 0.207497 |
| <i>Pygo2</i>         | chr3:89430213-89435128    | 19.3411  | 18.1537  | -0.0914 | 0.209383 |
| <i>Nf2</i>           | chr11:4765844-4849536     | 11.1470  | 12.4998  | 0.1653  | 0.233051 |
| <i>Pitrm1</i>        | chr13:6548156-6580139     | 27.5249  | 25.9326  | -0.0860 | 0.210394 |
| <i>Sart3</i>         | chr5:113742445-113771649  | 20.9964  | 22.9408  | 0.1278  | 0.100955 |
| <i>A130051J06Rik</i> | chr15:95787855-95791642   | 2.6958   | 3.2136   | 0.2535  | 0.105845 |
| <i>Lnpep</i>         | chr17:17527722-17624489   | 85.1631  | 92.8913  | 0.1253  | 0.193936 |
| <i>Polr3f</i>        | chr2:144527717-144541995  | 11.0214  | 10.4127  | -0.0820 | 0.133303 |
| <i>Mocs2</i>         | chr13:114818243-114829006 | 13.0983  | 11.9636  | -0.1307 | 0.196606 |
| <i>Hadha</i>         | chr5:30118300-30155162    | 30.9535  | 29.0994  | -0.0891 | 0.247502 |
| <i>4931406P16Rik</i> | chr7:34236706-34313551    | 10.6075  | 10.0793  | -0.0737 | 0.087643 |
| <i>Terf1</i>         | chr1:15805657-15843428    | 15.1328  | 17.2935  | 0.1926  | 0.186731 |
| <i>U2af1l4</i>       | chr7:30563300-30567960    | 29.8999  | 28.4318  | -0.0726 | 0.161806 |
| <i>Cdyl</i>          | chr13:35659861-35874064   | 8.1484   | 7.3983   | -0.1393 | 0.265127 |
| <i>Ssbp1</i>         | chr6:40471351-40481823    | 8.8987   | 10.1048  | 0.1834  | 0.153290 |
| <i>Rab23</i>         | chr1:33719881-33742564    | 1.0622   | 1.2701   | 0.2579  | 0.210107 |
| <i>Gm20716</i>       | chr2:168180985-168230364  | 28.7701  | 31.9979  | 0.1534  | 0.255181 |
| <i>Ubr4</i>          | chr4:139352608-139489588  | 29.0360  | 32.9953  | 0.1844  | 0.305144 |
| <i>Snx11</i>         | chr11:96767554-96777559   | 11.8057  | 10.7488  | -0.1353 | 0.333765 |
| <i>Mttr7</i>         | chr8:40551094-40634797    | 3.2391   | 2.8821   | -0.1684 | 0.210583 |
| <i>Vav1</i>          | chr17:57279099-57328031   | 74.2034  | 71.3393  | -0.0568 | 0.072253 |
| <i>Snrnp200</i>      | chr2:127208385-127240451  | 54.8803  | 52.5342  | -0.0630 | 0.227736 |
| <i>Amz1</i>          | chr5:140724126-140761439  | 1.6736   | 1.9316   | 0.2068  | 0.083756 |
| <i>Sgsm2</i>         | chr11:74849260-74897060   | 1.5172   | 1.7584   | 0.2128  | 0.105569 |
| <i>Rara</i>          | chr11:98927817-98974942   | 12.6287  | 14.3211  | 0.1814  | 0.233299 |
| <i>Eif4ebp3</i>      | chr18:36664059-36665917   | 26.7457  | 24.2976  | -0.1385 | 0.169363 |
| <i>Tmem127</i>       | chr2:127247907-127261107  | 37.1768  | 35.3750  | -0.0717 | 0.256763 |
| <i>Tmem33</i>        | chr5:67260564-67291461    | 8.7551   | 8.0808   | -0.1156 | 0.246038 |
| <i>Rpl13a</i>        | chr7:45125557-45136231    | 591.5198 | 516.8456 | -0.1947 | 0.346652 |
| <i>Atp7a</i>         | chrX:106027275-106124926  | 4.1922   | 4.6300   | 0.1433  | 0.110856 |
| <i>Slc38a7</i>       | chr8:95835919-95853539    | 3.9797   | 3.5399   | -0.1690 | 0.255512 |
| <i>Atp1b3</i>        | chr9:96332679-96364299    | 357.4992 | 385.8502 | 0.1101  | 0.105474 |
| <i>Srprb</i>         | chr9:103188032-103202137  | 13.4090  | 12.5909  | -0.0908 | 0.165972 |
| <i>Cnst</i>          | chr1:179546369-179627478  | 13.1419  | 12.5699  | -0.0642 | 0.144245 |
| <i>NA</i>            | chr12:55239325-55263020   | 5.5318   | 6.4490   | 0.2213  | 0.165246 |
| <i>Apeh</i>          | chr9:108085416-108094480  | 27.8164  | 30.3402  | 0.1253  | 0.100500 |
| <i>Cxcr6</i>         | chr9:123806476-123811754  | 6.5759   | 10.3514  | 0.6546  | 0.257771 |
| <i>1810043G02Rik</i> | chr10:77978523-77986905   | 1.8551   | 1.6075   | -0.2067 | 0.319824 |
| <i>Cep83os</i>       | chr10:94673492-94688613   | 4.2514   | 4.7897   | 0.1720  | 0.071056 |
| <i>Tcn2</i>          | chr11:3917191-3932159     | 4.8865   | 4.2508   | -0.2011 | 0.208915 |
| <i>Mgat4b</i>        | chr11:50210889-50235103   | 1.9375   | 2.3672   | 0.2890  | 0.136345 |
| <i>Polg2</i>         | chr11:106768252-106779537 | 6.9991   | 7.8348   | 0.1627  | 0.145366 |
| <i>Gtf2ird2</i>      | chr5:134184018-134224355  | 4.6118   | 4.2256   | -0.1262 | 0.226040 |
| <i>Nrip2</i>         | chr6:128399295-128408932  | 1.6790   | 1.4122   | -0.2496 | 0.216045 |
| <i>Smg9</i>          | chr7:24399618-24422778    | 21.3819  | 20.1181  | -0.0879 | 0.236742 |
| <i>Gm20537</i>       | chr9:88407431-88456616    | 42.6978  | 39.8921  | -0.0981 | 0.141160 |
| <i>MsrA</i>          | chr14:64122622-64455903   | 11.8874  | 10.1932  | -0.2218 | 0.358146 |
| <i>Dapl1</i>         | chr2:59484652-59505020    | 66.5826  | 51.8850  | -0.3598 | 0.236523 |
| <i>Pigt</i>          | chr2:164497519-164508301  | 9.8953   | 8.8761   | -0.1568 | 0.347187 |
| <i>Kpna6</i>         | chr4:129643979-129672767  | 11.6245  | 11.0559  | -0.0723 | 0.056446 |
| <i>Tmem131</i>       | chr1:36792190-36939527    | 15.1280  | 17.2089  | 0.1859  | 0.305719 |
| <i>Copa</i>          | chr1:172082528-172122330  | 46.7380  | 44.9740  | -0.0555 | 0.145065 |
| <i>Klhl21</i>        | chr4:152008802-152017680  | 12.7713  | 11.8784  | -0.1046 | 0.279614 |
| <i>Ankrd40</i>       | chr11:94328000-94341841   | 15.6634  | 14.8088  | -0.0809 | 0.134683 |
| <i>Sp2</i>           | chr11:96953339-96982959   | 3.0274   | 3.6053   | 0.2521  | 0.219559 |
| <i>Casd1</i>         | chr6:4600839-4643381      | 20.2834  | 19.1033  | -0.0865 | 0.197050 |
| <i>Mettl20</i>       | chr6:149139848-149151171  | 11.2356  | 10.2817  | -0.1280 | 0.250800 |
| <i>Sae1</i>          | chr7:16327052-16387797    | 30.9024  | 34.1163  | 0.1427  | 0.123247 |
| <i>Arc</i>           | chr15:74669082-74672570   | 1.9265   | 2.3904   | 0.3113  | 0.208169 |

|                      |                           |          |          |         |          |
|----------------------|---------------------------|----------|----------|---------|----------|
| <i>Ep300</i>         | chr15:81586213-81652077   | 11.7379  | 13.2753  | 0.1776  | 0.297895 |
| <i>Rap1a</i>         | chr3:105727266-105801330  | 30.0610  | 33.6357  | 0.1621  | 0.217540 |
| <i>Csf1</i>          | chr3:107741047-107760469  | 0.5433   | 1.2078   | 1.1524  | 0.202636 |
| <i>Usf2</i>          | chr7:30945251-30956803    | 23.3491  | 22.0647  | -0.0816 | 0.152666 |
| <i>Zfp609</i>        | chr9:65692390-65827564    | 2.4310   | 2.7830   | 0.1951  | 0.146665 |
| <i>AW554918</i>      | chr18:25168998-25467321   | 3.9300   | 4.3837   | 0.1576  | 0.113277 |
| <i>Ndufa2</i>        | chr18:36742331-36744557   | 62.3675  | 54.1344  | -0.2042 | 0.317005 |
| <i>Rnf213</i>        | chr11:119393099-119487418 | 71.9397  | 94.0950  | 0.3873  | 0.222749 |
| <i>Ptplad2</i>       | chr4:88396143-88438928    | 1.8847   | 1.6942   | -0.1537 | 0.078217 |
| <i>Cnnm3</i>         | chr1:36511866-36528237    | 6.2306   | 7.0900   | 0.1864  | 0.252594 |
| <i>Lpin1</i>         | chr12:16535668-16589770   | 12.3456  | 11.7302  | -0.0738 | 0.110452 |
| <i>Alms1</i>         | chr6:85587530-85702753    | 1.2410   | 1.5031   | 0.2765  | 0.290757 |
| <i>Cd2bp2</i>        | chr7:127191659-127196000  | 38.8081  | 36.8538  | -0.0745 | 0.234763 |
| <i>Colgalt1</i>      | chr8:71611023-71624909    | 26.7062  | 24.6286  | -0.1168 | 0.357584 |
| <i>N4bp1</i>         | chr8:86841138-86885258    | 7.3357   | 8.2076   | 0.1620  | 0.213132 |
| <i>Slc7a6</i>        | chr8:106168874-106198704  | 12.9993  | 14.2796  | 0.1355  | 0.107473 |
| <i>Acbd3</i>         | chr1:180726042-180754203  | 21.6610  | 23.7543  | 0.1331  | 0.131076 |
| <i>Samm50</i>        | chr15:84192232-84214303   | 44.3994  | 41.8170  | -0.0865 | 0.161978 |
| <i>Zfp524</i>        | chr7:5015500-5018486      | 17.3922  | 15.4435  | -0.1714 | 0.273701 |
| <i>Stard5</i>        | chr7:83631958-83653127    | 95.5879  | 91.5773  | -0.0618 | 0.201681 |
| <i>Klhl20</i>        | chr1:161088374-161131511  | 8.6265   | 8.1753   | -0.0775 | 0.127400 |
| <i>Rcsd1</i>         | chr1:165648944-165708094  | 83.2412  | 79.8494  | -0.0600 | 0.182677 |
| <i>Thumpd1</i>       | chr7:119715095-119720765  | 40.5605  | 38.3689  | -0.0801 | 0.164385 |
| <i>Elk1</i>          | chrX:20933394-20950608    | 2.6247   | 3.0522   | 0.2177  | 0.161232 |
| <i>Polrmt</i>        | chr10:79736122-79746581   | 9.8008   | 9.1593   | -0.0977 | 0.225178 |
| <i>Gdf11</i>         | chr10:128882294-128891718 | 7.8813   | 7.3111   | -0.1083 | 0.170692 |
| <i>4930599N23Rik</i> | chr6:39118407-39148312    | 8.6802   | 9.9378   | 0.1952  | 0.157412 |
| <i>Gimap1</i>        | chr6:48718606-48752600    | 99.2105  | 94.1650  | -0.0753 | 0.231838 |
| <i>Slc35a2</i>       | chrX:7884040-7894492      | 6.6625   | 6.0756   | -0.1331 | 0.198281 |
| <i>Rrp7a</i>         | chr15:83113432-83122801   | 11.8920  | 11.1854  | -0.0884 | 0.204794 |
| <i>Gm15441</i>       | chr3:96555764-96566801    | 112.5293 | 125.2760 | 0.1548  | 0.217435 |
| <i>Rpp25l</i>        | chr4:41712032-41713534    | 18.5474  | 16.5986  | -0.1602 | 0.225550 |
| <i>Angptl2</i>       | chr2:33216068-33247717    | 3.5508   | 6.9128   | 0.9611  | 0.263675 |
| <i>Ccdc9</i>         | chr7:16274041-16286795    | 11.4657  | 12.6253  | 0.1390  | 0.146800 |
| <i>Lamtor1</i>       | chr7:101905836-101911901  | 29.4286  | 26.7119  | -0.1397 | 0.258708 |
| <i>Lenep</i>         | chr3:89400987-89402793    | 5.9172   | 5.1366   | -0.2041 | 0.248971 |
| <i>Zfp426</i>        | chr9:20468548-20492746    | 12.5167  | 11.6060  | -0.1090 | 0.240960 |
| <i>Hbs1</i>          | chr10:21295978-21368889   | 13.8257  | 15.0448  | 0.1219  | 0.077390 |
| <i>Abhd5</i>         | chr9:122351607-122381524  | 2.5183   | 2.9650   | 0.2355  | 0.139619 |
| <i>Pdcd2</i>         | chr17:15519207-15527301   | 24.0068  | 22.5592  | -0.0897 | 0.142174 |
| <i>Stip1</i>         | chr19:7020695-7040026     | 55.2153  | 50.4452  | -0.1304 | 0.344878 |
| <i>Dcaf8</i>         | chr1:172148014-172196393  | 55.4084  | 53.1094  | -0.0611 | 0.182933 |
| <i>Tacc1</i>         | chr8:25154551-25201449    | 35.2677  | 33.5603  | -0.0716 | 0.269361 |
| <i>Traj9</i>         | chr14:54209392-54209450   | 109.7285 | 135.1779 | 0.3009  | 0.221973 |
| <i>Snx33</i>         | chr9:56917199-56928371    | 8.3298   | 7.7094   | -0.1117 | 0.269195 |
| <i>Ccdc22</i>        | chrX:7593808-7605517      | 15.7315  | 14.1591  | -0.1519 | 0.338494 |
| <i>Adrm1</i>         | chr2:180171484-180176286  | 6.3421   | 5.8301   | -0.1214 | 0.217452 |
| <i>Ndufaf4</i>       | chr4:24898082-24905001    | 8.3908   | 7.5281   | -0.1565 | 0.280521 |
| <i>Tpst1</i>         | chr5:130073325-130135729  | 2.8641   | 2.3949   | -0.2581 | 0.248566 |
| <i>Ms4a6c</i>        | chr19:11469367-11482197   | 39.2783  | 42.8541  | 0.1257  | 0.126722 |
| <i>Sgol2</i>         | chr1:57995970-58025899    | 0.7558   | 1.0296   | 0.4461  | 0.315719 |
| <i>BC051226</i>      | chr17:33908181-33909317   | 13.7932  | 12.4032  | -0.1533 | 0.121275 |
| <i>Taf6l</i>         | chr19:8774353-8786417     | 5.3327   | 4.8915   | -0.1246 | 0.194481 |
| <i>Gm17092</i>       | chr5:99977685-99978858    | 7.4704   | 6.1642   | -0.2773 | 0.243649 |
| <i>Gab3</i>          | chrX:74966842-75085458    | 3.8390   | 4.3785   | 0.1897  | 0.101291 |
| <i>Ndufs8</i>        | chr19:3908869-3912717     | 46.3945  | 41.2943  | -0.1680 | 0.316287 |
| <i>0610037L13Rik</i> | chr4:107889812-107899384  | 10.8394  | 10.2594  | -0.0793 | 0.095852 |
| <i>Akr7a5</i>        | chr4:139310743-139318426  | 7.0746   | 6.3939   | -0.1460 | 0.009997 |
| <i>2310003H01Rik</i> | chr11:120369054-120378764 | 6.1001   | 5.6896   | -0.1005 | 0.129341 |
| <i>Gdap10</i>        | chr12:32821871-32826904   | 5.8930   | 6.6860   | 0.1822  | 0.220092 |
| <i>Setd3</i>         | chr12:108106430-108179314 | 19.3759  | 18.4620  | -0.0697 | 0.140895 |
| <i>Rnf157</i>        | chr11:116336352-116413032 | 1.0411   | 0.8042   | -0.3726 | 0.368847 |
| <i>Map3k1</i>        | chr13:111746427-111808993 | 38.9237  | 42.0946  | 0.1130  | 0.149865 |
| <i>Ppp4c</i>         | chr7:126785906-126792471  | 125.2840 | 118.2097 | -0.0839 | 0.234865 |
| <i>Gmcl1</i>         | chr6:86691767-86733378    | 8.8038   | 9.8205   | 0.1577  | 0.118209 |
| <i>Fancc</i>         | chr13:63304708-63497278   | 4.7327   | 5.2388   | 0.1466  | 0.125245 |
| <i>D6Wsu163e</i>     | chr6:126939965-126975704  | 8.7208   | 7.9821   | -0.1277 | 0.131712 |
| <i>2010315B03Rik</i> | chr9:124292990-124311750  | 17.8434  | 19.7711  | 0.1480  | 0.069041 |
| <i>Klf9</i>          | chr19:23141225-23166911   | 1.1995   | 1.5012   | 0.3237  | 0.199926 |
| <i>Tmem55a</i>       | chr4:14864075-14915176    | 8.9811   | 8.1277   | -0.1440 | 0.196986 |
| <i>Ppard</i>         | chr17:28232753-28301469   | 1.3833   | 1.6864   | 0.2859  | 0.206580 |

|               |                           |            |            |         |          |
|---------------|---------------------------|------------|------------|---------|----------|
| NA            | chr15:76622087-76626027   | 191.0174   | 178.4877   | -0.0979 | 0.295794 |
| Trim44        | chr2:102300118-102407828  | 23.5505    | 25.7874    | 0.1309  | 0.142665 |
| Arf2          | chr11:103966738-103985337 | 8.1201     | 9.1610     | 0.1740  | 0.171992 |
| Prelid1       | chr13:55322054-55325271   | 87.1570    | 79.3068    | -0.1362 | 0.316193 |
| Pgm2          | chr4:99929413-99987294    | 14.8505    | 16.5641    | 0.1576  | 0.173925 |
| Bcat2         | chr7:45570152-45589710    | 12.6616    | 11.7314    | -0.1101 | 0.250819 |
| Mrpl20        | chr4:155803535-155809776  | 26.1153    | 23.1610    | -0.1732 | 0.279323 |
| Fam118b       | chr9:35216964-35267805    | 4.5845     | 5.0556     | 0.1411  | 0.022870 |
| Wdr78         | chr4:103038064-103114555  | 1.3659     | 1.1504     | -0.2477 | 0.343607 |
| Txlna         | chr4:129626077-129641065  | 21.2936    | 20.3319    | -0.0667 | 0.109150 |
| Vps4a         | chr8:107031221-107045755  | 37.5280    | 35.4301    | -0.0830 | 0.179689 |
| Fdx1          | chr9:51943306-51963533    | 10.2417    | 8.9089     | -0.2011 | 0.156925 |
| Ttll1         | chr15:83483771-83510893   | 1.7930     | 1.4909     | -0.2661 | 0.160020 |
| Pinx1         | chr14:63860311-63919859   | 8.4427     | 9.7802     | 0.2122  | 0.126008 |
| Hic2          | chr16:17233571-17263430   | 1.5566     | 1.3440     | -0.2119 | 0.279668 |
| Tjrc          | chr16:32608919-32632794   | 12.8697    | 11.8927    | -0.1139 | 0.287534 |
| Wdr75         | chr1:45795165-45823619    | 19.7182    | 18.4555    | -0.0955 | 0.240171 |
| Gbp3          | chr3:142560051-142573209  | 9.0896     | 10.8103    | 0.2501  | 0.339858 |
| 1300002E11Rik | chr16:21794346-21809037   | 6.1943     | 7.1233     | 0.2016  | 0.209499 |
| Dopey1        | chr9:86485406-86555806    | 31.6465    | 29.7984    | -0.0868 | 0.294020 |
| Got1          | chr19:43499751-43524605   | 9.8061     | 9.1195     | -0.1047 | 0.039699 |
| Hist2h3b      | chr3:96268653-96269141    | 45.4841    | 38.6670    | -0.2343 | 0.323120 |
| Hilpda        | chr6:29272487-29275446    | 7.7085     | 9.0862     | 0.2372  | 0.171263 |
| Ptpn23        | chr9:110385088-110408210  | 2.6424     | 3.1088     | 0.2345  | 0.243994 |
| Frmf8         | chr19:5849701-5875274     | 50.1542    | 47.9742    | -0.0641 | 0.247892 |
| Wdly1         | chr1:79702261-79776143    | 3.4262     | 3.8293     | 0.1604  | 0.110108 |
| Klhl2         | chr8:64739862-64849818    | 12.3421    | 11.4741    | -0.1052 | 0.180665 |
| Tjp2          | chr19:24094522-24225026   | 1.7551     | 3.0832     | 0.8129  | 0.278131 |
| Sfxn3         | chr19:45047575-45056383   | 10.6718    | 12.2399    | 0.1978  | 0.262561 |
| Lax1          | chr1:133679028-133690108  | 34.6777    | 40.1459    | 0.2112  | 0.331038 |
| Rxra          | chr2:27676439-27762957    | 3.0191     | 3.5379     | 0.2288  | 0.204504 |
| Nras          | chr3:103058338-103067914  | 50.2637    | 47.0528    | -0.0952 | 0.274208 |
| Rmrp          | chr4:43492787-43493058    | 19521.3102 | 15900.0120 | -0.2960 | 0.241943 |
| Prkcz         | chr4:155260128-155361361  | 1.1012     | 1.3339     | 0.2766  | 0.234212 |
| Mrps14        | chr1:160195214-160202170  | 8.7477     | 7.8243     | -0.1609 | 0.311093 |
| Rab1          | chr11:20201431-20226856   | 19.0470    | 21.0369    | 0.1434  | 0.157923 |
| 9030617O03Rik | chr12:100779056-100896981 | 5.0641     | 4.5901     | -0.1418 | 0.269121 |
| Hmocr         | chr13:96648966-96670936   | 20.5968    | 18.9627    | -0.1193 | 0.351105 |
| Zfp956        | chr6:47953389-47965300    | 15.1980    | 14.2239    | -0.0956 | 0.156837 |
| Polr3d        | chr14:70438747-70443471   | 15.9482    | 14.9697    | -0.0913 | 0.060134 |
| Izumo4        | chr10:80702692-80705382   | 46.6098    | 43.7237    | -0.0922 | 0.136644 |
| Nfil3         | chr13:52967208-52981073   | 1.6567     | 2.8965     | 0.8060  | 0.257266 |
| Nckap1l       | chr15:103453824-103498800 | 106.9105   | 103.3946   | -0.0482 | 0.115495 |
| Bfar          | chr16:13671857-13703612   | 20.6113    | 19.6425    | -0.0695 | 0.200385 |
| Comt          | chr16:18406885-18426852   | 6.5438     | 7.3652     | 0.1706  | 0.084465 |
| Setd6         | chr8:95715914-95719010    | 23.3976    | 21.9737    | -0.0906 | 0.092797 |
| Snape2        | chr8:4253101-4256219      | 10.5195    | 9.6087     | -0.1307 | 0.056951 |
| Ubxn8         | chr8:33619585-33641976    | 9.8314     | 10.9069    | 0.1498  | 0.110873 |
| Bsdcl         | chr4:129461580-129488498  | 14.0749    | 13.3060    | -0.0810 | 0.215294 |
| 9130023H24Rik | chr7:128234450-128238031  | 4.8821     | 5.4738     | 0.1650  | 0.045793 |
| Gm10434       | chr11:59208245-59208720   | 13.0633    | 11.0374    | -0.2431 | 0.154045 |
| Gm26679       | chr14:120384262-120388985 | 4.0647     | 5.0340     | 0.3086  | 0.189581 |
| Bcl7a         | chr5:123343833-123374082  | 2.9097     | 3.2971     | 0.1803  | 0.186602 |
| Fbxo5         | chr10:5799159-5805600     | 8.3692     | 9.5423     | 0.1892  | 0.166853 |
| Ubac2         | chr14:121878605-122021034 | 47.8134    | 45.6717    | -0.0661 | 0.095989 |
| Mad2l1        | chr6:66535389-66541033    | 5.2435     | 6.0522     | 0.2069  | 0.156126 |
| B4galt5       | chr2:167298443-167349183  | 10.8463    | 9.7929     | -0.1474 | 0.383811 |
| Ncoa5         | chr2:165000356-165034867  | 10.9712    | 11.9975    | 0.1290  | 0.067412 |
| Sptssa        | chr12:54645373-54656572   | 27.7567    | 31.1028    | 0.1642  | 0.186444 |
| Fbxl2         | chr9:113963636-114046191  | 4.7255     | 5.2598     | 0.1546  | 0.068125 |
| Zfp507        | chr7:35772345-35802989    | 14.8419    | 15.9849    | 0.1070  | 0.038894 |
| Egf           | chr3:129677574-129755322  | 0.7954     | 0.9956     | 0.3239  | 0.175354 |
| Rbms1         | chr2:60750192-60963192    | 20.3299    | 22.2120    | 0.1277  | 0.146009 |
| Gnptg         | chr17:25233330-25240124   | 19.4482    | 18.0922    | -0.1043 | 0.186782 |
| Gm25776       | chr12:91573429-91573572   | 50.6917    | 79.6042    | 0.6511  | 0.283117 |
| Otulin        | chr15:27605918-27630693   | 45.5247    | 42.7859    | -0.0895 | 0.205398 |
| Ptov1         | chr7:44863067-44869788    | 4.7118     | 4.1585     | -0.1802 | 0.341110 |
| Crtam         | chr9:40972752-41004628    | 4.3424     | 3.6068     | -0.2678 | 0.326092 |
| Gm21986       | chrX:101295838-101321348  | 4.0453     | 3.6464     | -0.1498 | 0.314429 |
| Ercc6l        | chrX:102141715-102157091  | 1.1663     | 1.3961     | 0.2595  | 0.186849 |
| Gm15629       | chr14:75197072-75199271   | 18.1656    | 21.4400    | 0.2391  | 0.186076 |

|               |                           |          |          |         |          |
|---------------|---------------------------|----------|----------|---------|----------|
| Gm6030        | chr16:45205099-45205501   | 33.0941  | 40.4834  | 0.2908  | 0.313066 |
| Sp140         | chr1:85600377-85645037    | 11.7763  | 13.0706  | 0.1504  | 0.159045 |
| L3mbtl3       | chr10:26274467-26375185   | 22.3134  | 21.1863  | -0.0748 | 0.161701 |
| Kidins220     | chr12:24974931-25059697   | 53.0803  | 50.5777  | -0.0697 | 0.318336 |
| Lpcat3        | chr9:124663026-124704418  | 18.1561  | 17.1759  | -0.0801 | 0.204841 |
| Aste1         | chr9:105395391-105405758  | 8.4085   | 7.8460   | -0.0999 | 0.049531 |
| Anks1         | chr17:27909339-28062600   | 8.6711   | 8.0708   | -0.1035 | 0.296000 |
| Gypc          | chr18:32528321-32560034   | 14.2499  | 15.6969  | 0.1395  | 0.072869 |
| Ccdc101       | chr7:126649308-126672925  | 15.8261  | 14.5090  | -0.1254 | 0.266312 |
| Pik3c3        | chr18:30272746-30348126   | 20.1413  | 21.6794  | 0.1062  | 0.026306 |
| Trip11        | chr12:101834042-101913267 | 21.1030  | 22.6646  | 0.1030  | 0.097603 |
| Rad51d        | chr11:82876433-82890614   | 10.7635  | 9.9898   | -0.1076 | 0.254980 |
| Lxn           | chr3:67457997-67463926    | 2.5130   | 3.0993   | 0.3025  | 0.102158 |
| Cct7          | chr6:85451504-85468477    | 76.2873  | 72.5682  | -0.0721 | 0.187023 |
| Tex30         | chr1:44086612-44102441    | 8.1888   | 7.2389   | -0.1779 | 0.263495 |
| Actr1b        | chr1:36699201-36714422    | 24.3518  | 23.0588  | -0.0787 | 0.203006 |
| Gm12359       | chr11:98797706-98810087   | 11.6855  | 10.6682  | -0.1314 | 0.201302 |
| Lpcat1        | chr13:73467196-73516422   | 15.5738  | 14.5214  | -0.1009 | 0.303338 |
| Bre           | chr5:31697683-32084962    | 7.5828   | 8.4839   | 0.1620  | 0.194300 |
| Gm26944       | chr7:92639738-92647442    | 19.3421  | 22.4492  | 0.2149  | 0.218549 |
| 2810428115Rik | chr8:70504291-70506752    | 11.5310  | 10.2682  | -0.1673 | 0.316076 |
| Nxf1          | chr19:8757102-8770909     | 115.6001 | 109.5477 | -0.0776 | 0.244660 |
| Mrpl44        | chr1:79776017-79781445    | 19.4213  | 17.2960  | -0.1672 | 0.275112 |
| Rad51         | chr2:119112792-119147445  | 1.4563   | 1.2917   | -0.1730 | 0.105189 |
| Rbm12b2       | chr4:12089438-12096243    | 14.3190  | 13.5947  | -0.0749 | 0.041358 |
| Mad2l2        | chr4:148130383-148145699  | 3.5103   | 4.0830   | 0.2180  | 0.127537 |
| Dhx33         | chr11:70984090-71004437   | 7.4899   | 7.0934   | -0.0785 | 0.204406 |
| Plekhh1       | chr11:103365087-103412664 | 5.9764   | 6.8943   | 0.2061  | 0.305131 |
| Akap13        | chr7:7545533-75754609     | 84.5590  | 93.0819  | 0.1385  | 0.266158 |
| Rps6kb2       | chr19:4156712-4163354     | 12.2862  | 13.7057  | 0.1577  | 0.170542 |
| Lrrc75b       | chr10:75550124-75560330   | 1.7711   | 2.1233   | 0.2617  | 0.189629 |
| Clint1        | chr11:45852050-45910625   | 37.3968  | 40.3382  | 0.1092  | 0.137157 |
| Mcm3          | chr1:20802973-20820278    | 21.8291  | 20.6725  | -0.0785 | 0.177375 |
| Tbl1x         | chrX:77511012-77662983    | 24.1210  | 26.0384  | 0.1104  | 0.097789 |
| Parp2         | chr14:50807945-50821300   | 38.3931  | 36.1431  | -0.0871 | 0.207071 |
| Suz12         | chr11:79993105-80034123   | 30.4167  | 33.0120  | 0.1181  | 0.122812 |
| Ctsc          | chr7:88278084-88310888    | 18.6665  | 17.5082  | -0.0924 | 0.246972 |
| Arhgef7       | chr8:11728104-11835219    | 4.4781   | 4.9542   | 0.1457  | 0.183007 |
| Hook3         | chr8:26021420-26119224    | 10.4194  | 11.2856  | 0.1152  | 0.134768 |
| Parp16        | chr9:65214689-65239219    | 3.5457   | 3.0955   | -0.1959 | 0.176351 |
| Zfp275        | chrX:73342620-73359080    | 15.3121  | 14.5448  | -0.0742 | 0.234081 |
| NA            | chr17:34996735-35000958   | 13.3761  | 15.8948  | 0.2489  | 0.359594 |
| Dbi           | chr1:120113279-120121078  | 18.5020  | 16.2643  | -0.1860 | 0.348897 |
| Dcaf12        | chr4:41291299-41314889    | 20.4464  | 19.4405  | -0.0728 | 0.158698 |
| Zfp273        | chr13:67813739-67827002   | 2.6427   | 3.0289   | 0.1968  | 0.076499 |
| 2210016L21Rik | chr5:114942157-114949783  | 10.0992  | 9.3523   | -0.1108 | 0.200398 |
| Trbj2-1       | chr6:41542753-41542803    | 142.7619 | 124.9084 | -0.1927 | 0.027912 |
| Lig1          | chr7:13277282-13311433    | 3.6979   | 4.1670   | 0.1723  | 0.143271 |
| Ftsj1         | chrX:8238667-8252406      | 2.5229   | 2.2200   | -0.1845 | 0.281508 |
| Mus81         | chr19:5482344-5488402     | 17.3649  | 16.3665  | -0.0854 | 0.175551 |
| Tceb1         | chr1:16642765-16656865    | 25.3594  | 28.7356  | 0.1803  | 0.196323 |
| Cdc23         | chr18:34630950-34651735   | 10.7766  | 10.2977  | -0.0656 | 0.068469 |
| Golga2        | chr2:32287383-32307921    | 19.0280  | 18.1749  | -0.0662 | 0.189431 |
| Gm10684       | chr9:45107175-45135606    | 2.5350   | 2.1468   | -0.2398 | 0.175448 |
| Deb1          | chr9:121710388-121712921  | 11.9930  | 14.3783  | 0.2617  | 0.175654 |
| Gm15743       | chr16:31427875-31429776   | 3.7161   | 3.1948   | -0.2180 | 0.135306 |
| Klhdc3        | chr17:46674549-46680930   | 16.7520  | 19.0448  | 0.1851  | 0.247952 |
| Mocs1         | chr17:49428361-49455435   | 8.7485   | 8.0779   | -0.1151 | 0.242282 |
| Ccdc73        | chr2:104867804-105017904  | 2.0525   | 2.3760   | 0.2112  | 0.086807 |
| Sec61b        | chr4:47474657-47483242    | 25.1157  | 21.9104  | -0.1970 | 0.335406 |
| Pop1          | chr15:34495303-34530648   | 5.1507   | 4.7330   | -0.1220 | 0.132449 |
| Gm20511       | chr11:103190709-103192896 | 23.1037  | 27.6606  | 0.2597  | 0.265128 |
| Zfp658        | chr7:43562255-43575461    | 5.2839   | 4.8187   | -0.1330 | 0.202029 |
| Mllt6         | chr11:97663413-97685463   | 77.8819  | 74.1697  | -0.0705 | 0.297686 |
| Ndn12         | chr7:64867051-64872997    | 4.6954   | 4.3643   | -0.1055 | 0.097181 |
| Ppil2         | chr16:17086554-17111257   | 30.1175  | 29.0842  | -0.0504 | 0.133793 |
| Tnks1bp1      | chr2:85048021-85073048    | 7.7541   | 7.1317   | -0.1207 | 0.336744 |
| Klh9          | chr4:88718291-88722465    | 54.4491  | 50.8666  | -0.0982 | 0.298686 |
| Rnf5          | chr17:34601090-34603690   | 5.6046   | 6.6269   | 0.2417  | 0.154320 |
| Mtch2         | chr2:90847154-90866810    | 9.6134   | 9.1461   | -0.0719 | 0.117536 |
| Sgta          | chr10:81044074-81060178   | 21.1053  | 19.6318  | -0.1044 | 0.255046 |

|                      |                           |          |          |         |          |
|----------------------|---------------------------|----------|----------|---------|----------|
| <i>Uap1</i>          | chr1:170141937-170174957  | 9.4714   | 8.8534   | -0.0974 | 0.097959 |
| <i>Ube2j2</i>        | chr4:155943830-155959604  | 8.2952   | 7.7824   | -0.0921 | 0.105892 |
| <i>Gcdh</i>          | chr8:84886392-84893921    | 11.4528  | 10.5470  | -0.1189 | 0.259680 |
| <i>Mtap</i>          | chr4:89137121-89181081    | 16.2060  | 18.0362  | 0.1544  | 0.173242 |
| <i>Katnbl1</i>       | chr2:112379210-112414240  | 4.4487   | 5.0368   | 0.1791  | 0.132308 |
| <i>Tmem173</i>       | chr18:35733677-35740554   | 68.2191  | 65.0395  | -0.0689 | 0.276556 |
| <i>Rpl10a-ps1</i>    | chr1:64993923-64994631    | 14.1640  | 12.2638  | -0.2078 | 0.227492 |
| <i>Hspa4l</i>        | chr3:40744494-40796103    | 4.8423   | 5.3179   | 0.1352  | 0.168036 |
| <i>Slc35e1</i>       | chr8:72480640-72492614    | 26.5148  | 25.3410  | -0.0653 | 0.199931 |
| <i>Anapc5</i>        | chr5:122787468-122821339  | 119.9402 | 113.9035 | -0.0745 | 0.275643 |
| <i>Dolpp1</i>        | chr2:30392253-30400529    | 8.4785   | 7.8643   | -0.1085 | 0.164287 |
| <i>Zfp365</i>        | chr10:67886102-67912662   | 2.2738   | 2.6757   | 0.2348  | 0.238580 |
| <i>Larp1</i>         | chr11:58009063-58062034   | 21.9597  | 24.8126  | 0.1762  | 0.322428 |
| <i>Emc6</i>          | chr11:73175518-73177037   | 29.6165  | 26.6935  | -0.1499 | 0.309377 |
| <i>Arl5c</i>         | chr11:97989577-97996181   | 63.7564  | 59.3626  | -0.1030 | 0.300496 |
| <i>Slc25a28</i>      | chr19:43663821-43674881   | 23.8666  | 22.3897  | -0.0922 | 0.160497 |
| <i>Eri3</i>          | chr4:117550364-117674297  | 8.2659   | 7.7006   | -0.1022 | 0.033703 |
| <i>Laptm5</i>        | chr4:130913124-130936141  | 137.7281 | 151.5736 | 0.1382  | 0.223917 |
| <i>Bin2</i>          | chr15:100641076-100669553 | 184.0276 | 176.2371 | -0.0624 | 0.275174 |
| <i>Cand1</i>         | chr10:119199254-119240055 | 25.4112  | 24.3136  | -0.0637 | 0.249255 |
| <i>Pdcd1</i>         | chr1:94038306-94052553    | 15.9891  | 27.3483  | 0.7744  | 0.306901 |
| <i>Nt5dc1</i>        | chr10:34288287-34418552   | 22.3341  | 24.6213  | 0.1407  | 0.193839 |
| <i>Gm11724</i>       | chr11:117789896-117791313 | 24.0053  | 27.3169  | 0.1864  | 0.049910 |
| <i>Zfp456</i>        | chr13:67345245-67375810   | 9.5761   | 8.9051   | -0.1048 | 0.286522 |
| <i>Cdc25a</i>        | chr9:109875578-109893888  | 10.3514  | 9.5393   | -0.1179 | 0.238083 |
| <i>Ebag9</i>         | chr15:44619640-44641024   | 13.9396  | 15.9094  | 0.1907  | 0.214083 |
| <i>Sgsm3</i>         | chr15:80977764-81012289   | 1.9276   | 2.2888   | 0.2478  | 0.175967 |
| <i>Ankrd28</i>       | chr14:31700014-31830415   | 11.2400  | 12.6183  | 0.1669  | 0.276533 |
| <i>Cxadr</i>         | chr16:78301495-78359785   | 0.6700   | 0.8457   | 0.3360  | 0.247647 |
| <i>Kif18a</i>        | chr2:109280737-109341747  | 0.8086   | 0.9633   | 0.2526  | 0.223667 |
| <i>Zfp639</i>        | chr3:32515294-32520685    | 44.1260  | 41.3024  | -0.0954 | 0.240211 |
| <i>Nrf1</i>          | chr6:30047987-30153458    | 10.9132  | 10.4834  | -0.0580 | 0.107619 |
| <i>Reep2</i>         | chr18:34840588-34847463   | 3.5620   | 4.2699   | 0.2615  | 0.190619 |
| <i>Fam45a</i>        | chr19:60811584-60836227   | 6.4873   | 7.1543   | 0.1412  | 0.142120 |
| <i>Gopc</i>          | chr10:52337023-52382124   | 11.3738  | 12.3278  | 0.1162  | 0.013155 |
| <i>Derl2</i>         | chr11:71007163-71019841   | 8.7256   | 9.4250   | 0.1112  | 0.037152 |
| <i>Pex12</i>         | chr11:83294641-83302586   | 3.8864   | 4.4959   | 0.2102  | 0.223699 |
| <i>Tmtc4</i>         | chr14:122918970-122984035 | 2.9702   | 3.2978   | 0.1509  | 0.056828 |
| <i>NA</i>            | chr1:143605161-143606608  | 3.6393   | 4.3395   | 0.2539  | 0.076459 |
| <i>Lrrc41</i>        | chr4:116075268-116097043  | 9.9272   | 9.2089   | -0.1084 | 0.296741 |
| <i>Scml4</i>         | chr10:42860369-42960780   | 38.4746  | 36.7987  | -0.0643 | 0.273307 |
| <i>2210015D19Rik</i> | chr11:5762128-5784710     | 5.3662   | 4.8220   | -0.1543 | 0.242797 |
| <i>Slc5a10</i>       | chr11:61672780-61720826   | 3.6164   | 3.1338   | -0.2066 | 0.255357 |
| <i>Bud31</i>         | chr5:145140361-145148078  | 48.1775  | 43.8391  | -0.1361 | 0.313889 |
| <i>Ptpre</i>         | chr7:135537823-135686294  | 12.7137  | 12.0311  | -0.0796 | 0.219174 |
| <i>Babam1</i>        | chr8:71396854-71404772    | 38.4261  | 36.3623  | -0.0796 | 0.166479 |
| <i>Chordc1</i>       | chr9:18292266-18314000    | 52.1495  | 48.1371  | -0.1155 | 0.338859 |
| <i>Traf7</i>         | chr17:24508561-24527938   | 23.0379  | 22.1472  | -0.0569 | 0.145828 |
| <i>Pot1b</i>         | chr17:55652024-55712628   | 9.0222   | 9.9531   | 0.1417  | 0.114828 |
| <i>Lrsam1</i>        | chr2:32925215-32961614    | 3.4260   | 3.1252   | -0.1326 | 0.137439 |
| <i>Elp4</i>          | chr2:105697319-105904564  | 2.3779   | 2.6721   | 0.1683  | 0.083834 |
| <i>Fam73a</i>        | chr3:152273458-152340407  | 2.7894   | 3.1500   | 0.1754  | 0.090535 |
| <i>Arid1a</i>        | chr4:133679007-133756769  | 15.6231  | 18.0380  | 0.2074  | 0.373884 |
| <i>Tcf7</i>          | chr11:52252370-52283014   | 228.7134 | 257.0237 | 0.1684  | 0.297560 |
| <i>Mrps24</i>        | chr11:5703982-5715680     | 24.1374  | 21.7252  | -0.1519 | 0.307532 |
| <i>Zfp777</i>        | chr6:48024187-48048911    | 19.0082  | 17.7993  | -0.0948 | 0.294484 |
| <i>Map1s</i>         | chr8:70905973-70917526    | 12.4233  | 11.5135  | -0.1097 | 0.322538 |
| <i>Tmem255a</i>      | chrX:38196572-38252439    | 0.8977   | 1.1036   | 0.2980  | 0.134013 |
| <i>Ric1</i>          | chr19:29522281-29606829   | 8.6917   | 9.5937   | 0.1425  | 0.234475 |
| <i>Exoc7</i>         | chr11:116288000-116307233 | 14.8395  | 14.1378  | -0.0699 | 0.086684 |
| <i>Zfp346</i>        | chr13:55105310-55134825   | 7.4759   | 8.3312   | 0.1563  | 0.176184 |
| <i>Snrpd2</i>        | chr7:19149721-19152735    | 28.9826  | 25.1273  | -0.2059 | 0.316816 |
| <i>Rrp1</i>          | chr10:78400361-78413043   | 93.9872  | 88.9617  | -0.0793 | 0.273299 |
| <i>Wbscr27</i>       | chr5:134932367-134942637  | 6.5337   | 5.8865   | -0.1505 | 0.326323 |
| <i>Jade3</i>         | chrX:20425687-20519939    | 4.6109   | 4.1506   | -0.1517 | 0.322523 |
| <i>Tepl</i>          | chr14:50824061-50870560   | 6.7836   | 7.5765   | 0.1595  | 0.244001 |
| <i>Dennd1c</i>       | chr17:57066055-57078510   | 50.7391  | 54.7224  | 0.1090  | 0.114084 |
| <i>Rpa3</i>          | chr6:8255935-8259173      | 9.5032   | 11.0417  | 0.2165  | 0.218939 |
| <i>Fbxo28</i>        | chr1:182313101-182341606  | 19.4589  | 18.5436  | -0.0695 | 0.154157 |
| <i>Mex3c</i>         | chr18:73573043-73592575   | 28.1939  | 26.9129  | -0.0671 | 0.179443 |
| <i>Haus2</i>         | chr2:120609382-120621560  | 7.1318   | 8.1875   | 0.1992  | 0.251537 |

|                      |                           |          |          |         |          |
|----------------------|---------------------------|----------|----------|---------|----------|
| <i>Bcas3</i>         | chr11:85353166-85826058   | 7.6560   | 8.3347   | 0.1225  | 0.087206 |
| <i>Gm17296</i>       | chr8:126426651-126475065  | 8.9157   | 8.2109   | -0.1188 | 0.335153 |
| <i>Zfp831</i>        | chr2:174643533-174710832  | 18.6341  | 20.4382  | 0.1333  | 0.241830 |
| <i>Kpna4</i>         | chr3:69067148-69127113    | 25.5445  | 27.6519  | 0.1144  | 0.145542 |
| <i>Pus10</i>         | chr11:23665673-23732876   | 7.9381   | 8.6729   | 0.1277  | 0.039490 |
| <i>Gltscr1</i>       | chr7:15971261-15999495    | 3.0281   | 3.6953   | 0.2873  | 0.371381 |
| <i>Atf5</i>          | chr7:44812256-44816658    | 2.2419   | 1.8421   | -0.2834 | 0.249396 |
| <i>Zfp143</i>        | chr7:110061701-110095392  | 30.1105  | 28.3032  | -0.0893 | 0.258036 |
| <i>Zfp300</i>        | chrX:21079173-21089527    | 1.8172   | 1.5593   | -0.2209 | 0.286800 |
| <i>Prepl</i>         | chr17:85063476-85090267   | 4.5896   | 5.1429   | 0.1642  | 0.090662 |
| <i>Gm26888</i>       | chr11:119151650-119156994 | 3.5898   | 3.1018   | -0.2108 | 0.362086 |
| <i>Fanci</i>         | chr7:79391928-79450265    | 9.8793   | 9.0882   | -0.1204 | 0.315450 |
| <i>Hspbp1</i>        | chr7:4660520-4684963      | 17.7697  | 16.3353  | -0.1214 | 0.271430 |
| <i>Zeb1</i>          | chr18:5591859-5775467     | 14.1395  | 15.1953  | 0.1039  | 0.061315 |
| <i>Ywhab</i>         | chr2:163994959-164018588  | 31.9081  | 34.5520  | 0.1148  | 0.088967 |
| <i>Txndc15</i>       | chr13:55714649-55726221   | 30.7206  | 28.7393  | -0.0962 | 0.199046 |
| <i>Trbj1-7</i>       | chr6:41535641-41535686    | 162.8154 | 197.7547 | 0.2805  | 0.220568 |
| <i>Adar</i>          | chr3:89715021-89753446    | 40.1482  | 44.4609  | 0.1472  | 0.278845 |
| <i>Dancr</i>         | chr5:74093059-74095405    | 4.1068   | 3.6318   | -0.1773 | 0.175424 |
| <i>Rtn4ip1</i>       | chr10:43901806-43947862   | 4.2426   | 4.9128   | 0.2116  | 0.215436 |
| <i>Selo</i>          | chr15:89089083-89100340   | 23.8362  | 22.7216  | -0.0691 | 0.175522 |
| <i>Gm13789</i>       | chr5:114363414-114365357  | 25.2396  | 28.7254  | 0.1866  | 0.161074 |
| <i>Cd2ap</i>         | chr17:42792950-42876424   | 29.8745  | 28.2799  | -0.0791 | 0.237902 |
| <i>Stard4</i>        | chr18:33199354-33213862   | 4.3924   | 4.8909   | 0.1551  | 0.106873 |
| <i>Sv2a</i>          | chr3:96181150-96195521    | 2.0374   | 2.3406   | 0.2002  | 0.087983 |
| <i>Fancm</i>         | chr12:65075605-65132058   | 5.2948   | 4.9574   | -0.0950 | 0.183996 |
| <i>Asun</i>          | chr6:146549631-146577835  | 25.2461  | 23.7929  | -0.0855 | 0.261789 |
| <i>Tm6sf1</i>        | chr7:81859000-81884434    | 4.9626   | 4.5936   | -0.1115 | 0.240203 |
| <i>NA</i>            | chrX:12134458-12160346    | 4.5232   | 3.7817   | -0.2583 | 0.274130 |
| <i>Spef2</i>         | chr15:9578192-9748868     | 1.6365   | 1.4796   | -0.1454 | 0.024855 |
| <i>Dcaf11</i>        | chr14:55560005-55570065   | 13.1766  | 14.1843  | 0.1063  | 0.051947 |
| <i>Dus3l</i>         | chr17:56764750-56770092   | 24.6002  | 23.1425  | -0.0881 | 0.285729 |
| <i>Snx2</i>          | chr18:53176364-53220860   | 39.0643  | 42.7913  | 0.1315  | 0.195340 |
| <i>Gtf3c5</i>        | chr2:28566310-28583751    | 3.5840   | 4.0586   | 0.1794  | 0.146440 |
| <i>Romo1</i>         | chr2:156144038-156145797  | 20.0970  | 17.7086  | -0.1825 | 0.307534 |
| <i>Ece1</i>          | chr4:137862236-137965229  | 7.7982   | 8.8861   | 0.1884  | 0.275230 |
| <i>Zbtb24</i>        | chr10:41450395-41465571   | 21.8950  | 20.6247  | -0.0862 | 0.190783 |
| <i>Hist1h3b</i>      | chr13:23752266-23752886   | 12.7772  | 18.5654  | 0.5390  | 0.287746 |
| <i>Dpy19l3</i>       | chr7:35685164-35754454    | 2.2585   | 2.5149   | 0.1551  | 0.144386 |
| <i>Zfp330</i>        | chr8:82763620-82774160    | 26.2667  | 24.3573  | -0.1089 | 0.241829 |
| <i>Irgm1</i>         | chr11:48861967-48871683   | 36.7603  | 40.6803  | 0.1462  | 0.247007 |
| <i>Cdkn2aipnl</i>    | chr11:51967660-51977334   | 55.3196  | 51.6428  | -0.0992 | 0.288794 |
| <i>Shpk</i>          | chr11:73199459-73224511   | 5.2773   | 4.7179   | -0.1616 | 0.278138 |
| <i>Tnpo3</i>         | chr6:29540826-29609887    | 20.6821  | 19.9908  | -0.0490 | 0.104467 |
| <i>Pagr1a</i>        | chr7:127001481-127020327  | 14.8194  | 14.0872  | -0.0731 | 0.122939 |
| <i>Fbrs</i>          | chr7:127485220-127491513  | 10.5939  | 12.1676  | 0.1998  | 0.291087 |
| <i>Oraov1</i>        | chr7:144915099-144930748  | 6.3662   | 6.9831   | 0.1334  | 0.027078 |
| <i>Keap1</i>         | chr9:21229729-21239332    | 22.5123  | 21.4423  | -0.0703 | 0.213421 |
| <i>Tipin</i>         | chr9:64281606-64304792    | 15.5932  | 17.6407  | 0.1780  | 0.186504 |
| <i>Fyco1</i>         | chr9:123789509-123851899  | 10.6041  | 11.7563  | 0.1488  | 0.248021 |
| <i>5033417F24Rik</i> | chr1:92908379-92910764    | 4.2728   | 3.7587   | -0.1849 | 0.095855 |
| <i>Txn1</i>          | chr18:63662800-63692359   | 17.7234  | 16.0141  | -0.1463 | 0.318197 |
| <i>Ppig</i>          | chr2:69722544-69754012    | 9.7767   | 10.7212  | 0.1330  | 0.162534 |
| <i>Galk2</i>         | chr2:125859108-125984299  | 7.9102   | 7.3828   | -0.0995 | 0.239225 |
| <i>Nup210l</i>       | chr3:90104131-90212017    | 2.1509   | 1.9262   | -0.1591 | 0.189706 |
| <i>Prpf38b</i>       | chr3:108902666-108911727  | 61.5139  | 65.2221  | 0.0844  | 0.017384 |
| <i>Nedd4</i>         | chr9:72662556-72749842    | 0.9785   | 1.2276   | 0.3272  | 0.241931 |
| <i>Gm22486</i>       | chr6:71882556-71882693    | 46.6631  | 60.0264  | 0.3633  | 0.391323 |
| <i>Pus1</i>          | chr5:110773666-110780659  | 15.2759  | 14.3232  | -0.0929 | 0.138761 |
| <i>Pfas</i>          | chr11:68985696-69008460   | 7.1607   | 6.6511   | -0.1065 | 0.329464 |
| <i>Ykt6</i>          | chr11:5955692-5967780     | 32.0307  | 30.5361  | -0.0689 | 0.158233 |
| <i>Fam193b</i>       | chr13:55539318-55571120   | 28.0432  | 26.2431  | -0.0957 | 0.364104 |
| <i>B9d2</i>          | chr7:25681157-25686558    | 5.6229   | 6.7185   | 0.2568  | 0.160059 |
| <i>Btg1</i>          | chr10:96617000-96622813   | 160.8178 | 178.7099 | 0.1522  | 0.268548 |
| <i>Rars</i>          | chr11:35808380-35834506   | 25.8148  | 24.0718  | -0.1009 | 0.284901 |
| <i>Eif2b2</i>        | chr12:85219480-85226628   | 25.8974  | 24.1403  | -0.1014 | 0.269506 |
| <i>NA</i>            | chr13:23535421-23535951   | 11.0741  | 13.8787  | 0.3257  | 0.347342 |
| <i>Nqo2</i>          | chr13:33964658-33988465   | 3.8564   | 4.3574   | 0.1762  | 0.142122 |
| <i>Cdk20</i>         | chr13:64432552-64439720   | 2.8025   | 2.3413   | -0.2594 | 0.283562 |
| <i>Cdk6</i>          | chr5:3343892-3523218      | 4.9243   | 5.8556   | 0.2499  | 0.306483 |
| <i>Fam109a</i>       | chr5:121849027-121854599  | 2.8331   | 2.4692   | -0.1984 | 0.141176 |

|                      |                           |          |          |         |          |
|----------------------|---------------------------|----------|----------|---------|----------|
| <i>Usp1</i>          | chr5:149184349-149215434  | 15.4917  | 14.6702  | -0.0786 | 0.266547 |
| <i>Scaf1</i>         | chr7:45002947-45016363    | 6.8969   | 7.6636   | 0.1521  | 0.234255 |
| <i>E030037K01Rik</i> | chr8:47713265-47715021    | 5.1138   | 4.5489   | -0.1689 | 0.112293 |
| <i>Zfp866</i>        | chr8:69761325-69791178    | 24.1002  | 23.0906  | -0.0617 | 0.218146 |
| <i>A130014A01Rik</i> | chr8:120101581-120103904  | 3.3447   | 3.9174   | 0.2280  | 0.121334 |
| <i>Gm16568</i>       | chr9:15330572-15335345    | 13.7692  | 15.3952  | 0.1610  | 0.168491 |
| <i>Gm16754</i>       | chr9:21225370-21232639    | 15.8770  | 14.8932  | -0.0923 | 0.124429 |
| <i>Vps11</i>         | chr9:44348105-44361670    | 30.6760  | 29.2590  | -0.0682 | 0.231291 |
| <i>Ppib</i>          | chr9:66060168-66066629    | 211.1662 | 193.9835 | -0.1224 | 0.357489 |
| <i>Stag1</i>         | chr9:100597797-100958545  | 19.1372  | 20.5426  | 0.1022  | 0.049992 |
| <i>Pgrmc1</i>        | chrX:36598205-36606079    | 24.5331  | 23.0935  | -0.0872 | 0.167459 |
| <i>Spag1</i>         | chr15:36179367-36235610   | 3.3210   | 3.7731   | 0.1841  | 0.078173 |
| <i>Btd</i>           | chr14:31641027-31668579   | 7.8760   | 7.1540   | -0.1387 | 0.194576 |
| <i>Lrp10</i>         | chr14:54464163-54471497   | 41.7783  | 46.3753  | 0.1506  | 0.283982 |
| <i>Ints9</i>         | chr14:64950044-65039835   | 7.8291   | 8.7830   | 0.1659  | 0.135838 |
| <i>Naa60</i>         | chr16:3872374-3904770     | 24.9270  | 26.6608  | 0.0970  | 0.007335 |
| <i>A1846148</i>      | chr19:7356463-7383026     | 8.6387   | 8.0299   | -0.1054 | 0.201373 |
| <i>Dpcd</i>          | chr19:45560614-45578279   | 13.6777  | 12.3397  | -0.1485 | 0.236341 |
| <i>Fam117b</i>       | chr1:59913005-59985346    | 17.1837  | 18.6663  | 0.1194  | 0.133739 |
| <i>Nifk</i>          | chr1:118321838-118333822  | 34.1004  | 31.3652  | -0.1206 | 0.331366 |
| <i>Ppp1r15b</i>      | chr1:133131142-133139783  | 48.4305  | 46.5824  | -0.0561 | 0.260825 |
| <i>Tsen15</i>        | chr1:152370734-152386688  | 2.5695   | 3.0607   | 0.2523  | 0.082646 |
| <i>Kifap3</i>        | chr1:163779582-163917109  | 1.9687   | 2.3063   | 0.2283  | 0.126149 |
| <i>Casc5</i>         | chr2:119047118-119105501  | 1.0786   | 1.3649   | 0.3396  | 0.372646 |
| <i>Ppip5k1</i>       | chr2:121310560-121355396  | 1.1268   | 1.2682   | 0.1705  | 0.065373 |
| <i>Stk4</i>          | chr2:164070321-164155524  | 147.8499 | 142.9009 | -0.0491 | 0.145833 |
| <i>Sys1</i>          | chr2:164456963-164479638  | 12.1941  | 11.5560  | -0.0775 | 0.228687 |
| <i>Dcst1</i>         | chr3:89350218-89365253    | 1.1635   | 1.3995   | 0.2664  | 0.109545 |
| <i>Nfx1</i>          | chr4:40970905-41025993    | 27.3770  | 26.4582  | -0.0492 | 0.207872 |
| <i>Acot11</i>        | chr4:106744554-106804998  | 1.6760   | 2.0533   | 0.2929  | 0.330559 |
| <i>Tnfrsf1b</i>      | chr4:145213462-145246870  | 15.7421  | 19.7190  | 0.3250  | 0.261069 |
| <i>Nlrx1</i>         | chr9:44252712-44268599    | 1.6366   | 2.0094   | 0.2961  | 0.295277 |
| <i>Gata3</i>         | chr2:9857077-9890034      | 8.3329   | 9.4362   | 0.1794  | 0.264008 |
| <i>Vcl</i>           | chr14:20929432-21033673   | 4.4637   | 4.9485   | 0.1488  | 0.107071 |
| <i>Phlpp1</i>        | chr1:106171751-106394250  | 2.8593   | 3.3050   | 0.2090  | 0.259875 |
| <i>Ptbp1</i>         | chr10:79854426-79864771   | 48.5209  | 46.5909  | -0.0586 | 0.211215 |
| <i>Csnk1d</i>        | chr11:120961748-120991330 | 30.0921  | 28.8194  | -0.0623 | 0.304482 |
| <i>Polr1e</i>        | chr4:45018582-45036565    | 8.4335   | 7.8727   | -0.0993 | 0.165236 |
| <i>Cdca7l</i>        | chr12:117804288-117878706 | 11.8934  | 10.9424  | -0.1202 | 0.268796 |
| <i>Parp8</i>         | chr13:116854823-117025516 | 25.1617  | 27.3228  | 0.1189  | 0.110315 |
| <i>Fam193a</i>       | chr5:34369932-34486456    | 13.0886  | 14.5216  | 0.1499  | 0.278475 |
| <i>Setd5</i>         | chr6:113077364-113153435  | 16.5018  | 18.2759  | 0.1473  | 0.298260 |
| <i>Clns1a</i>        | chr7:97696633-97718879    | 37.3327  | 34.4948  | -0.1141 | 0.284543 |
| <i>Slc7a6os</i>      | chr8:106200437-106210933  | 37.3846  | 35.2040  | -0.0867 | 0.288411 |
| <i>Man2c1</i>        | chr9:57130689-57142722    | 20.5408  | 19.5979  | -0.0678 | 0.314427 |
| <i>Tmem29</i>        | chrX:150397772-150459154  | 0.9054   | 1.0680   | 0.2383  | 0.175964 |
| <i>Gm26884</i>       | chr15:79689139-79692385   | 2.6966   | 2.3205   | -0.2167 | 0.293230 |
| <i>Tfb1m</i>         | chr17:3519262-3557713     | 7.5303   | 8.6955   | 0.2076  | 0.135214 |
| <i>Tceb2</i>         | chr17:23824739-23829109   | 85.1589  | 77.2001  | -0.1416 | 0.336133 |
| <i>Timm21</i>        | chr18:84947293-84951524   | 24.5165  | 22.6033  | -0.1172 | 0.226163 |
| <i>Traf2</i>         | chr2:25517981-25546940    | 14.3747  | 13.7089  | -0.0684 | 0.198389 |
| <i>Pard6b</i>        | chr2:168081003-168101203  | 1.6881   | 1.4610   | -0.2085 | 0.107836 |
| <i>Trim2</i>         | chr3:84160438-84305446    | 0.4035   | 0.4859   | 0.2681  | 0.245698 |
| <i>Cct3</i>          | chr3:88297115-88321767    | 41.7067  | 39.1079  | -0.0928 | 0.307362 |
| <i>Gm26530</i>       | chr3:116488965-116493358  | 3.4173   | 3.8306   | 0.1647  | 0.023556 |
| <i>Capzb</i>         | chr4:139192898-139291818  | 50.8034  | 47.1663  | -0.1072 | 0.345090 |
| <i>Gm26672</i>       | chr18:37746558-37768242   | 0.5997   | 0.7440   | 0.3112  | 0.197376 |
| <i>Arpc1a</i>        | chr5:145083829-145108761  | 13.8205  | 15.0921  | 0.1270  | 0.047928 |
| <i>Ssu72</i>         | chr4:155704799-155733879  | 39.7635  | 36.9558  | -0.1056 | 0.317025 |
| <i>Ctstn1</i>        | chr4:149586467-149648899  | 4.4731   | 5.1628   | 0.2069  | 0.288847 |
| <i>Serpib9</i>       | chr13:33003249-33017957   | 10.9603  | 10.1838  | -0.1060 | 0.247319 |
| <i>Gm10125</i>       | chr18:5491502-5593505     | 0.6893   | 0.8479   | 0.2987  | 0.247177 |
| <i>Trav14-2</i>      | chr14:53640700-53641224   | 21.4860  | 18.8741  | -0.1870 | 0.180999 |
| <i>Higd2a</i>        | chr13:54590206-54591158   | 60.7971  | 54.6899  | -0.1527 | 0.338472 |
| <i>Kif15</i>         | chr9:122951080-123018725  | 2.6859   | 3.2675   | 0.2828  | 0.365757 |
| <i>Acat2</i>         | chr17:12942889-12960747   | 6.8339   | 6.2443   | -0.1302 | 0.136157 |
| <i>Nop58</i>         | chr1:59685005-59711510    | 65.8000  | 61.4208  | -0.0994 | 0.303699 |
| <i>Gm21985</i>       | chr2:112266313-112406319  | 34.5410  | 37.3950  | 0.1145  | 0.183987 |
| <i>Gm17388</i>       | chr4:136355773-136359440  | 3.2581   | 3.7907   | 0.2184  | 0.228120 |
| <i>Wdr70</i>         | chr15:7873054-8099209     | 8.6382   | 9.9190   | 0.1995  | 0.229719 |
| <i>Trim39</i>        | chr17:36258872-36272247   | 20.6632  | 19.6723  | -0.0709 | 0.283233 |

|                      |                           |           |           |         |          |
|----------------------|---------------------------|-----------|-----------|---------|----------|
| <i>Itm2c</i>         | chr1:85894280-85908675    | 60.7599   | 57.6789   | -0.0751 | 0.286383 |
| <i>Fbxl8</i>         | chr8:105264647-105269326  | 8.4463    | 7.7234    | -0.1291 | 0.212226 |
| <i>Gm26083</i>       | chr11:117077242-117077435 | 103.0653  | 86.2227   | -0.2574 | 0.355378 |
| <i>Tango2</i>        | chr16:18300824-18348103   | 3.2847    | 3.7239    | 0.1811  | 0.255835 |
| <i>Rab40c</i>        | chr17:25882113-25919727   | 6.5141    | 5.8898    | -0.1453 | 0.308014 |
| <i>Oasl1</i>         | chr5:114923239-114937915  | 5.2019    | 7.2272    | 0.4744  | 0.249286 |
| <i>Slc25a32</i>      | chr15:39094190-39112716   | 13.9283   | 12.9751   | -0.1023 | 0.215194 |
| <i>Dnase1l2</i>      | chr17:24440080-24443105   | 4.4434    | 3.8890    | -0.1922 | 0.314967 |
| <i>Cd52</i>          | chr4:134082447-134095082  | 768.4990  | 696.9345  | -0.1410 | 0.390195 |
| <i>Kansl1</i>        | chr11:104333228-104468861 | 21.4464   | 23.7024   | 0.1443  | 0.253141 |
| <i>Smarcd3</i>       | chr5:24590817-24602012    | 10.3785   | 9.6538    | -0.1044 | 0.340138 |
| <i>Apol7e</i>        | chr15:77698888-77719288   | 22.3728   | 20.9391   | -0.0955 | 0.266763 |
| <i>Camk2d</i>        | chr3:126596301-126844913  | 6.8344    | 7.6021    | 0.1536  | 0.283488 |
| <i>Cyb561a3</i>      | chr19:10577453-10588548   | 12.1015   | 11.0951   | -0.1253 | 0.223445 |
| <i>Tfb2m</i>         | chr1:179528054-179546267  | 3.0328    | 3.5326    | 0.2201  | 0.154000 |
| <i>Zbtb49</i>        | chr5:38189734-38220457    | 2.9861    | 2.7557    | -0.1158 | 0.228267 |
| <i>Ggnbp2</i>        | chr11:84832360-84870817   | 39.0715   | 41.8878   | 0.1004  | 0.082388 |
| <i>Mmab</i>          | chr5:114431033-114444059  | 4.7972    | 4.3639    | -0.1366 | 0.213446 |
| <i>Ptger1</i>        | chr8:83666832-83672753    | 32.1213   | 30.6220   | -0.0690 | 0.320627 |
| <i>Dus2</i>          | chr8:105991336-106053840  | 3.8050    | 4.4557    | 0.2278  | 0.279756 |
| <i>Vprbp</i>         | chr9:106821873-106883318  | 26.7408   | 25.7680   | -0.0535 | 0.205120 |
| <i>Ppp1r37</i>       | chr7:19530966-19562398    | 19.0394   | 17.8518   | -0.0929 | 0.334305 |
| <i>Myl6</i>          | chr10:128490859-128493875 | 134.3323  | 122.5447  | -0.1325 | 0.362471 |
| <i>Rps5</i>          | chr7:12922289-12926686    | 710.0068  | 636.2079  | -0.1583 | 0.400791 |
| <i>Pank2</i>         | chr2:131262494-131299188  | 23.4780   | 22.5811   | -0.0562 | 0.055730 |
| <i>Smox</i>          | chr2:131491495-131525922  | 4.0898    | 3.6978    | -0.1453 | 0.242326 |
| <i>Mrm1</i>          | chr11:84813060-84819515   | 13.0956   | 12.2448   | -0.0969 | 0.265581 |
| <i>Mtmr1</i>         | chrX:71364759-71419196    | 15.3195   | 14.5032   | -0.0790 | 0.218443 |
| <i>Ssna1</i>         | chr2:25271038-25272438    | 27.9062   | 25.0683   | -0.1547 | 0.345879 |
| <i>Ccdc124</i>       | chr8:70868226-70873490    | 35.8713   | 31.9465   | -0.1672 | 0.362925 |
| <i>Agbl5</i>         | chr5:30888693-30906965    | 8.8277    | 8.2842    | -0.0917 | 0.283591 |
| <i>Ccdc92</i>        | chr5:124834417-124862424  | 1.9582    | 2.3883    | 0.2865  | 0.189862 |
| <i>Zkscan5</i>       | chr5:145204561-145221750  | 5.2910    | 5.9181    | 0.1616  | 0.150357 |
| <i>Isq20</i>         | chr7:78913423-78920362    | 5.4948    | 6.6076    | 0.2661  | 0.317604 |
| <i>Mbnl2</i>         | chr14:120275668-120431697 | 21.2957   | 23.1086   | 0.1179  | 0.153265 |
| <i>Sdc3</i>          | chr4:130792536-130826319  | 0.9606    | 1.1684    | 0.2824  | 0.240746 |
| <i>Brcc3</i>         | chrX:75416627-75454001    | 6.1320    | 6.7712    | 0.1431  | 0.195329 |
| <i>Gnas</i>          | chr2:174284319-174346744  | 20.5011   | 22.2368   | 0.1172  | 0.169183 |
| <i>Gas2</i>          | chr7:51862014-51994975    | 0.9794    | 1.1939    | 0.2857  | 0.187783 |
| <i>Acaa1a</i>        | chr9:119339675-119350299  | 15.3230   | 14.6942   | -0.0604 | 0.010385 |
| <i>Rlim</i>          | chrX:103957162-103981284  | 33.8325   | 35.9526   | 0.0877  | 0.046426 |
| <i>Gpd1l</i>         | chr9:114899340-114933987  | 19.0299   | 17.8659   | -0.0911 | 0.358316 |
| <i>Gm14233</i>       | chr2:131298544-131299835  | 9.1093    | 11.1889   | 0.2967  | 0.159799 |
| <i>Rrp8</i>          | chr7:105732206-105737376  | 16.3133   | 15.2999   | -0.0925 | 0.207093 |
| <i>Lars2</i>         | chr9:123366939-123462664  | 4.6254    | 5.3827    | 0.2187  | 0.326278 |
| <i>1110058L19Rik</i> | chr1:23995938-24005656    | 5.5147    | 6.7065    | 0.2823  | 0.189332 |
| <i>Ppox</i>          | chr1:171275989-171281186  | 14.4312   | 13.6519   | -0.0801 | 0.267550 |
| <i>A830080D01Rik</i> | chrX:159526687-159593081  | 8.4260    | 9.4434    | 0.1645  | 0.213205 |
| <i>Rraga</i>         | chr4:86575672-86577281    | 11.0473   | 12.6198   | 0.1920  | 0.242193 |
| <i>Cyca</i>          | chr6:50562562-50566538    | 3.5657    | 4.0798    | 0.1943  | 0.152601 |
| <i>Zfp326</i>        | chr5:105876564-105915818  | 4.6354    | 5.1228    | 0.1442  | 0.159390 |
| <i>Wasl</i>          | chr6:24613804-24665009    | 6.3192    | 6.9642    | 0.1402  | 0.149709 |
| <i>Cebpa</i>         | chr7:35119292-35121926    | 1.7072    | 3.2110    | 0.9114  | 0.331689 |
| <i>Tspan32os</i>     | chr7:142988968-143008033  | 16.6388   | 15.0966   | -0.1403 | 0.267927 |
| <i>Mcoln1</i>        | chr8:3500456-3515232      | 12.1620   | 11.4878   | -0.0823 | 0.173988 |
| <i>Has3</i>          | chr8:106870241-106884566  | 7.5669    | 7.1570    | -0.0803 | 0.211253 |
| <i>Gm10804</i>       | chr2:93452818-93469871    | 1.7525    | 2.0733    | 0.2425  | 0.117958 |
| <i>9430008C03Rik</i> | chr2:158355306-158361580  | 15.2852   | 14.3642   | -0.0897 | 0.316868 |
| <i>Alad</i>          | chr4:62509168-62519918    | 6.1210    | 5.3495    | -0.1944 | 0.307801 |
| <i>Pofut2</i>        | chr10:77259299-77269586   | 18.6986   | 17.4045   | -0.1035 | 0.320159 |
| <i>Trpv2</i>         | chr11:62574485-62600515   | 20.9716   | 19.9568   | -0.0716 | 0.240578 |
| <i>Slc39a11</i>      | chr11:113244852-113650079 | 8.4861    | 7.8082    | -0.1201 | 0.312108 |
| <i>Cul4a</i>         | chr8:13105620-13147940    | 12.0146   | 11.4688   | -0.0671 | 0.210114 |
| <i>Gm17491</i>       | chr8:22480290-22483330    | 14.7627   | 13.8588   | -0.0911 | 0.205052 |
| <i>AA386476</i>      | chr8:47675390-47677055    | 2.3356    | 2.8220    | 0.2730  | 0.075436 |
| <i>Gm27006</i>       | chr8:79705596-79706539    | 4.9962    | 4.1510    | -0.2674 | 0.252851 |
| <i>Ptlad1</i>        | chr9:64986984-65021717    | 56.2821   | 52.5117   | -0.1000 | 0.367553 |
| <i>Eef1a1</i>        | chr9:78478448-78489151    | 1955.3562 | 1789.8447 | -0.1276 | 0.378995 |
| <i>Syn1</i>          | chrX:20860510-20921004    | 1.3763    | 1.7247    | 0.3256  | 0.294064 |
| <i>Zfp280c</i>       | chrX:48541624-48594504    | 7.2805    | 7.9634    | 0.1293  | 0.111153 |
| <i>1110038F14Rik</i> | chr15:76948538-76950729   | 24.7297   | 23.0276   | -0.1029 | 0.120158 |



|                      |                           |         |         |         |          |
|----------------------|---------------------------|---------|---------|---------|----------|
| <i>D030056L22Rik</i> | chr19:18713192-18718428   | 11.1459 | 10.2244 | -0.1245 | 0.171256 |
| <i>E030042O20Rik</i> | chr2:75704769-75710024    | 4.7238  | 4.1041  | -0.2029 | 0.187991 |
| <i>Tyro3</i>         | chr2:119797732-119818104  | 2.1081  | 1.8705  | -0.1725 | 0.326671 |
| <i>Gm26899</i>       | chr2:120532903-120539846  | 14.5597 | 16.0754 | 0.1429  | 0.172285 |
| <i>Zscan29</i>       | chr2:121158272-121171125  | 13.9326 | 14.9216 | 0.0989  | 0.037211 |
| <i>Psemb4</i>        | chr3:94884092-94886961    | 78.7311 | 72.8855 | -0.1113 | 0.339213 |
| <i>Tnpo2</i>         | chr8:85036914-85057583    | 24.5939 | 23.2710 | -0.0798 | 0.315738 |
| <i>Gm14471</i>       | chr2:30306066-30323986    | 3.6151  | 4.1738  | 0.2073  | 0.112831 |
| <i>Cep41</i>         | chr6:30653456-30693749    | 2.8685  | 3.2124  | 0.1633  | 0.041289 |
| <i>Dot1l</i>         | chr10:80755205-80795461   | 5.6817  | 6.4218  | 0.1766  | 0.310512 |
| <i>Coq10a</i>        | chr10:128363096-128370032 | 8.2371  | 7.6362  | -0.1093 | 0.104561 |
| <i>Tmem18</i>        | chr12:30584442-30591213   | 16.7872 | 15.7952 | -0.0879 | 0.249952 |
| <i>Thumpd3</i>       | chr6:113046224-113068273  | 19.8524 | 21.5674 | 0.1195  | 0.116287 |
| <i>Tm2d2</i>         | chr8:25017210-25023259    | 15.2349 | 13.7980 | -0.1429 | 0.270639 |
| <i>B3gnt9</i>        | chr8:105252637-105255153  | 2.9765  | 2.6345  | -0.1761 | 0.107032 |
| <i>Nup133</i>        | chr8:123897122-123949265  | 6.9190  | 6.5171  | -0.0863 | 0.144086 |
| <i>Prickle3</i>      | chrX:7657259-7668186      | 4.6556  | 5.2094  | 0.1621  | 0.175966 |
| <i>Eef1d</i>         | chr15:75894795-75909556   | 32.0585 | 29.8517 | -0.1029 | 0.353521 |
| <i>Bbip1</i>         | chr19:53929678-53944627   | 32.8933 | 36.1305 | 0.1354  | 0.199429 |
| <i>Dst</i>           | chr1:33908224-34308652    | 0.8528  | 1.1499  | 0.4312  | 0.273093 |
| <i>Vps4b</i>         | chr1:106764070-106796728  | 20.8953 | 22.5235 | 0.1083  | 0.137102 |
| <i>Nr1i3</i>         | chr1:171213969-171220701  | 7.0380  | 6.4923  | -0.1164 | 0.317015 |
| <i>Nfs1</i>          | chr2:156078928-156144186  | 15.2343 | 14.5098 | -0.0703 | 0.196611 |
| <i>Ndufb5</i>        | chr3:32736989-32751566    | 28.3456 | 25.6756 | -0.1427 | 0.352609 |
| <i>Prdm2</i>         | chr4:143107390-143212995  | 11.9406 | 13.3324 | 0.1591  | 0.300041 |
| <i>Slc25a14</i>      | chrX:48623412-48662294    | 2.6499  | 3.1332  | 0.2417  | 0.166291 |
| <i>Uqcr11</i>        | chr10:80402996-80406830   | 30.6057 | 27.4866 | -0.1551 | 0.300652 |
| <i>Gcc1</i>          | chr6:28416090-28428390    | 13.7639 | 13.0651 | -0.0752 | 0.208506 |
| <i>Recql</i>         | chr6:142350341-142387087  | 16.7157 | 15.9996 | -0.0632 | 0.230511 |
| <i>Pnkp</i>          | chr7:44857138-44862925    | 23.6100 | 22.3869 | -0.0767 | 0.210730 |
| <i>Pard6a</i>        | chr8:105701153-105703493  | 2.8853  | 3.5162  | 0.2853  | 0.179645 |
| <i>Tbcel</i>         | chr9:42412315-42507809    | 17.5852 | 16.8616 | -0.0606 | 0.191083 |
| <i>Nol12</i>         | chr15:78934932-78943634   | 5.1476  | 5.7442  | 0.1582  | 0.136559 |
| <i>Racgap1</i>       | chr15:99620495-99651656   | 2.2605  | 2.7150  | 0.2643  | 0.372167 |
| <i>Pfdn6</i>         | chr17:33938820-33940343   | 29.2155 | 26.2748 | -0.1531 | 0.339891 |
| <i>Rrp36</i>         | chr17:46667457-46674255   | 26.5554 | 24.7134 | -0.1037 | 0.263042 |
| <i>Vps8</i>          | chr16:21423117-21644680   | 5.1784  | 5.6283  | 0.1202  | 0.099344 |
| <i>Hcls1</i>         | chr16:36934982-36963212   | 93.7228 | 89.0631 | -0.0736 | 0.290428 |
| <i>Rhbdd1</i>        | chr1:82316451-82445366    | 9.3706  | 8.6287  | -0.1190 | 0.359009 |
| <i>Atg16l1</i>       | chr1:87755869-87792428    | 14.4195 | 13.7311 | -0.0706 | 0.334652 |
| <i>Fbxo38</i>        | chr18:62504068-62548743   | 42.8205 | 41.4194 | -0.0480 | 0.060176 |
| <i>Golga1</i>        | chr2:39016260-39065541    | 16.7847 | 16.1314 | -0.0573 | 0.097971 |
| <i>Tagap1</i>        | chr17:6954964-6961156     | 7.9142  | 7.3207  | -0.1124 | 0.111577 |
| <i>Gm11695</i>       | chr11:115462044-115463454 | 15.3305 | 13.3255 | -0.2022 | 0.152210 |
| <i>Gm20536</i>       | chr6:72609835-72616190    | 67.7880 | 63.4907 | -0.0945 | 0.103791 |
| <i>Fnta</i>          | chr8:25998728-26015601    | 35.1119 | 32.7786 | -0.0992 | 0.301165 |
| <i>Gm17169</i>       | chr8:81790557-81790908    | 12.5207 | 15.1776 | 0.2776  | 0.156844 |
| <i>Dusp12</i>        | chr1:170873497-170885540  | 8.9312  | 8.2200  | -0.1197 | 0.271276 |
| <i>Mbd1</i>          | chr18:74268271-74282685   | 25.9729 | 24.6337 | -0.0764 | 0.283120 |
| <i>Fitm2</i>         | chr2:163466378-163472629  | 4.5872  | 4.2167  | -0.1215 | 0.214495 |
| <i>Dcp1a</i>         | chr14:30479564-30527056   | 14.5444 | 15.8025 | 0.1197  | 0.165435 |
| <i>Psemb7</i>        | chr2:38588035-38644087    | 50.6265 | 46.1839 | -0.1325 | 0.332553 |
| <i>Zcrb1</i>         | chr15:93386096-93398334   | 11.7406 | 12.7585 | 0.1200  | 0.026430 |
| <i>Lyst</i>          | chr13:13590408-13777440   | 31.8097 | 30.2642 | -0.0719 | 0.360239 |
| <i>Mrps12</i>        | chr7:28739640-28741820    | 19.3526 | 17.2042 | -0.1698 | 0.340840 |
| <i>Ubb</i>           | chr11:62551170-62553213   | 72.1657 | 81.9070 | 0.1827  | 0.324994 |
| <i>Sirt5</i>         | chr13:43370709-43395202   | 11.0704 | 10.0396 | -0.1410 | 0.247077 |
| <i>Pla2g6</i>        | chr15:79286227-79328390   | 1.6779  | 1.9533  | 0.2193  | 0.190089 |
| <i>Atp6v0a2</i>      | chr5:124629066-12472144   | 36.2244 | 34.5288 | -0.0692 | 0.257220 |
| <i>Arap1</i>         | chr7:101348066-101412586  | 14.7751 | 14.0712 | -0.0704 | 0.327397 |
| <i>Psmg2</i>         | chr18:67641598-67654162   | 23.8566 | 21.8110 | -0.1293 | 0.288948 |
| <i>Polr2c</i>        | chr8:94857449-94864242    | 10.1701 | 9.3078  | -0.1278 | 0.139680 |
| <i>Gm17344</i>       | chr8:109859983-109868455  | 15.5481 | 17.2598 | 0.1507  | 0.120956 |
| <i>Timm13</i>        | chr10:80899449-80900969   | 25.5964 | 23.5688 | -0.1191 | 0.292995 |
| <i>Hiatl1</i>        | chr13:65064662-65112982   | 18.2619 | 17.3378 | -0.0749 | 0.271817 |
| <i>Rdh10</i>         | chr1:16105773-16133734    | 3.8698  | 3.5086  | -0.1413 | 0.286278 |
| <i>Lair1</i>         | chr7:4007072-4063204      | 4.8128  | 4.3664  | -0.1404 | 0.250994 |
| <i>Serpini1</i>      | chr3:75557546-75643495    | 2.9671  | 2.6847  | -0.1443 | 0.293417 |
| <i>Gpn1</i>          | chr5:31494740-31512903    | 6.0247  | 5.7009  | -0.0797 | 0.191375 |
| <i>Calcoo1</i>       | chr15:102706778-102722178 | 9.9354  | 9.2614  | -0.1014 | 0.332377 |
| <i>Top3b</i>         | chr16:16870735-16892990   | 10.7579 | 10.2297 | -0.0726 | 0.326651 |

|               |                           |          |          |         |          |
|---------------|---------------------------|----------|----------|---------|----------|
| Zfyve27       | chr19:42163950-42194590   | 10.3003  | 9.6768   | -0.0901 | 0.368337 |
| Lypla1        | chr1:4807787-4886770      | 13.5235  | 14.9302  | 0.1428  | 0.245561 |
| Ncf2          | chr1:152807889-152836990  | 1.9325   | 2.3141   | 0.2600  | 0.188808 |
| Camk1d        | chr2:5293456-5714515      | 6.6823   | 7.2821   | 0.1240  | 0.133651 |
| Ptges2        | chr2:32395895-32402739    | 6.6068   | 5.9815   | -0.1434 | 0.184997 |
| Manbal        | chr2:157367593-157396763  | 7.9804   | 9.2737   | 0.2167  | 0.167134 |
| Cebpb         | chr2:167688914-167690418  | 4.5297   | 3.9407   | -0.2010 | 0.184782 |
| Gm26873       | chr17:17389942-17395303   | 5.7307   | 6.4749   | 0.1762  | 0.102250 |
| Larp4b        | chr13:9093904-9173086     | 40.8008  | 39.4098  | -0.0500 | 0.159639 |
| Sppl2a        | chr2:126890390-126933235  | 16.3780  | 17.5865  | 0.1027  | 0.104405 |
| Atp10d        | chr5:72203328-72298775    | 16.7216  | 18.1614  | 0.1192  | 0.201816 |
| Eij4e2        | chr1:87213913-87240488    | 13.7063  | 13.1982  | -0.0545 | 0.123728 |
| Nfic          | chr10:81396185-81431005   | 1.0879   | 1.2960   | 0.2526  | 0.255598 |
| Uqcr10        | chr11:4701972-4704342     | 59.3185  | 53.4972  | -0.1490 | 0.349296 |
| Rpl37rt       | chr5:115102921-115110268  | 6.6992   | 5.7069   | -0.2313 | 0.089478 |
| Pom121        | chr5:135376140-135394546  | 3.0801   | 3.5404   | 0.2009  | 0.299400 |
| Bola2         | chr7:126695400-126697058  | 33.7244  | 30.3965  | -0.1499 | 0.381139 |
| Stk24         | chr14:121286342-121379334 | 62.1748  | 66.8373  | 0.1043  | 0.128179 |
| Tfeb          | chr17:47737029-47792419   | 3.6632   | 3.3693   | -0.1206 | 0.271196 |
| Gm26447       | chr16:23111300-23111429   | 141.1028 | 170.2457 | 0.2709  | 0.436755 |
| Rad9a         | chr19:4195197-4201603     | 61.3992  | 58.4459  | -0.0711 | 0.247315 |
| B3gat3        | chr19:8920373-8927234     | 26.1508  | 24.4789  | -0.0953 | 0.270927 |
| Cdc37l1       | chr19:28990493-29017569   | 38.7946  | 36.9842  | -0.0689 | 0.252663 |
| Zranb3        | chr1:127954183-128103047  | 1.0507   | 1.2580   | 0.2598  | 0.223960 |
| Gm26533       | chr18:31781225-31789045   | 8.6891   | 9.7440   | 0.1653  | 0.126330 |
| Comm2         | chr3:57642903-57651715    | 4.8653   | 4.4546   | -0.1272 | 0.238128 |
| Dnajb14       | chr3:137867674-137916557  | 1.8254   | 2.0149   | 0.1425  | 0.089667 |
| Kdm4a         | chr4:118136956-118180043  | 27.6025  | 26.5413  | -0.0566 | 0.249684 |
| H6pd          | chr4:149979474-150009023  | 10.3988  | 9.8269   | -0.0816 | 0.278431 |
| Plk3          | chr4:117128654-117133963  | 7.5228   | 8.7557   | 0.2190  | 0.322776 |
| Midn          | chr10:80148271-80158368   | 16.1381  | 14.9162  | -0.1136 | 0.410347 |
| Vrk3          | chr7:44748412-44777515    | 20.4032  | 19.3131  | -0.0792 | 0.301679 |
| Cflar         | chr1:58711507-58758884    | 31.1778  | 30.0156  | -0.0548 | 0.252460 |
| Capn10        | chr1:92934375-92947941    | 4.1635   | 3.8412   | -0.1162 | 0.189961 |
| Rpl17         | chr18:75000476-750003381  | 18.1071  | 20.4563  | 0.1760  | 0.154852 |
| Zfp58         | chr13:67490166-67500555   | 15.7716  | 14.7302  | -0.0986 | 0.263738 |
| Qdpr          | chr5:45434031-45450235    | 16.0494  | 14.9390  | -0.1034 | 0.213611 |
| 3110062M04Rik | chr6:34871770-34878060    | 5.5859   | 6.1851   | 0.1470  | 0.136214 |
| Gm26770       | chr6:128356003-128358839  | 6.0084   | 6.7862   | 0.1756  | 0.104065 |
| Timm10b       | chr7:105640055-105655748  | 13.4095  | 12.4068  | -0.1121 | 0.310308 |
| Arf3          | chr15:98737620-98763214   | 40.5693  | 38.7654  | -0.0656 | 0.273645 |
| Lpxn          | chr19:12798605-12833807   | 30.7304  | 34.5921  | 0.1708  | 0.328532 |
| Gm15417       | chr3:89391849-89398779    | 3.0496   | 2.6429   | -0.2065 | 0.053568 |
| Fasn          | chr11:120805939-120824178 | 31.3895  | 29.5114  | -0.0890 | 0.418727 |
| Sik3          | chr9:46012819-46224194    | 5.6470   | 6.4048   | 0.1817  | 0.339505 |
| 1600002K03Rik | chr10:80172943-80175146   | 11.4796  | 10.0618  | -0.1902 | 0.219984 |
| Osbp13        | chr6:50293329-50456201    | 1.0719   | 1.8622   | 0.7968  | 0.299300 |
| Rhno1         | chr6:128356999-128362911  | 14.9732  | 16.2797  | 0.1207  | 0.037924 |
| Ap1m1         | chr8:72240017-72257385    | 24.3602  | 27.3018  | 0.1645  | 0.273693 |
| 2300009A05Rik | chr9:63394446-63399244    | 22.0502  | 19.6893  | -0.1634 | 0.299240 |
| Crtap         | chr9:114375133-114390675  | 4.2559   | 3.6967   | -0.2032 | 0.305454 |
| Rbbp7         | chrX:162760401-162779092  | 36.3753  | 39.6913  | 0.1259  | 0.167891 |
| Gm17066       | chr14:105109389-105114676 | 19.4828  | 21.5860  | 0.1479  | 0.105638 |
| Chml          | chr1:175686487-175688353  | 2.9518   | 3.4868   | 0.2403  | 0.113366 |
| Myl12a        | chr17:70993655-71002878   | 48.7999  | 45.3797  | -0.1048 | 0.351899 |
| Zfp398        | chr6:47835660-47868257    | 7.1848   | 7.8235   | 0.1229  | 0.103764 |
| Fis1          | chr5:136953274-136966234  | 52.1493  | 48.1296  | -0.1157 | 0.366143 |
| Knop1         | chr7:118842221-118856254  | 13.4343  | 12.7401  | -0.0765 | 0.257296 |
| Ndufa7        | chr17:33824590-33838316   | 33.9909  | 31.1525  | -0.1258 | 0.358171 |
| Rab31         | chr17:65651725-65772752   | 1.5639   | 1.8533   | 0.2449  | 0.139959 |
| B230217O12Rik | chr19:57323384-57360775   | 3.8251   | 4.5318   | 0.2446  | 0.221019 |
| Nup37         | chr10:88146991-88178388   | 10.1384  | 9.1535   | -0.1474 | 0.247669 |
| Pyurf         | chr6:57686575-57692078    | 5.9960   | 5.4024   | -0.1504 | 0.304796 |
| Rasgrp4       | chr7:29134853-29153961    | 4.3423   | 4.0366   | -0.1053 | 0.274177 |
| Sphk2         | chr7:45709466-45718002    | 15.9608  | 15.1556  | -0.0747 | 0.254746 |
| Metap1        | chr3:138458959-138489382  | 27.8383  | 26.1778  | -0.0887 | 0.300384 |
| Fdft1         | chr14:63145152-63177793   | 9.0726   | 8.1943   | -0.1469 | 0.389063 |
| Trim32        | chr4:65604985-65616238    | 5.8834   | 5.4062   | -0.1220 | 0.243845 |
| Pknox1        | chr17:31564748-31607680   | 17.8872  | 17.0934  | -0.0655 | 0.219918 |
| Glmn          | chr5:107548966-107597888  | 5.3020   | 5.9186   | 0.1587  | 0.049783 |
| Gabrapl2      | chr8:111940702-111953612  | 4.9053   | 5.6258   | 0.1977  | 0.224749 |

|               |                           |          |          |         |          |
|---------------|---------------------------|----------|----------|---------|----------|
| Zkscan7       | chr9:122888470-122896124  | 6.7422   | 7.6854   | 0.1889  | 0.220260 |
| Ercc4         | chr16:13109683-13150617   | 7.3138   | 7.9548   | 0.1212  | 0.125599 |
| Znhit1        | chr5:136982163-136988021  | 7.6867   | 6.8417   | -0.1680 | 0.308456 |
| Ankrd11       | chr8:122883336-122974793  | 48.9537  | 53.3509  | 0.1241  | 0.266942 |
| Acbd6         | chr1:155558119-155687233  | 12.7826  | 11.8626  | -0.1078 | 0.298622 |
| Golph3        | chr15:12321495-12351265   | 75.2972  | 70.8107  | -0.0886 | 0.348122 |
| Med22         | chr2:26905261-26910677    | 18.8203  | 17.6434  | -0.0932 | 0.320417 |
| Maml1         | chr11:50255633-50292311   | 7.4027   | 8.2929   | 0.1638  | 0.283371 |
| Ctps          | chr4:120539867-120570276  | 11.1675  | 10.5655  | -0.0799 | 0.102709 |
| Rbm4          | chr19:4784292-4793901     | 30.4591  | 29.0065  | -0.0705 | 0.330555 |
| Ulp1          | chr10:7444872-7473477     | 3.7492   | 4.3769   | 0.2233  | 0.150804 |
| Gvin1         | chr7:106156534-106215340  | 0.8325   | 1.0336   | 0.3121  | 0.358228 |
| Thada         | chr17:84190055-84466196   | 20.7264  | 22.5628  | 0.1225  | 0.256118 |
| Bptf          | chr11:107033080-107132127 | 31.1456  | 33.7504  | 0.1159  | 0.234809 |
| Sos2          | chr12:69583761-69681852   | 4.5676   | 5.0545   | 0.1461  | 0.234863 |
| Zfp119a       | chr17:55865203-55878862   | 9.2988   | 10.3410  | 0.1532  | 0.051059 |
| Kif5b         | chr18:6201001-6242174     | 53.7988  | 51.3769  | -0.0665 | 0.304934 |
| Fpgs          | chr2:32682608-32704137    | 5.5800   | 5.1985   | -0.1022 | 0.147631 |
| Efcab14       | chr4:115737743-11577327   | 5.8480   | 6.3804   | 0.1257  | 0.167746 |
| B3galnt2      | chr13:13954673-13999068   | 25.1481  | 23.7523  | -0.0824 | 0.300260 |
| Gm25394       | chr13:49684300-49684433   | 26.2656  | 36.0586  | 0.4572  | 0.401786 |
| Rab7          | chr6:87999105-88045270    | 16.5040  | 18.6945  | 0.1798  | 0.288104 |
| Chst10        | chr1:38863876-38898160    | 9.4624   | 10.4143  | 0.1383  | 0.113478 |
| Kdm1b         | chr13:47043498-47084613   | 17.4338  | 16.6008  | -0.0706 | 0.222604 |
| Ubap2         | chr4:41194312-41275144    | 7.7147   | 8.6847   | 0.1709  | 0.285997 |
| Ksr1          | chr11:79013439-79146407   | 4.1275   | 4.7594   | 0.2055  | 0.350905 |
| NA            | chr5:105323790-105343929  | 11.7852  | 13.5339  | 0.1996  | 0.286587 |
| Adnp          | chr2:168180985-168207112  | 21.5723  | 24.3734  | 0.1761  | 0.388883 |
| 1700064H15Rik | chr3:19610367-19628677    | 30.7132  | 25.9638  | -0.2424 | 0.405203 |
| Trbv29        | chr6:41271402-41271881    | 39.2967  | 46.9826  | 0.2577  | 0.369092 |
| Marvel2       | chr13:100595956-100616971 | 1.5269   | 1.8830   | 0.3024  | 0.317503 |
| Tesk2         | chr4:116720947-116805956  | 8.2157   | 7.7550   | -0.0832 | 0.074155 |
| Sept6         | chrX:36911325-36991794    | 40.2668  | 37.6550  | -0.0967 | 0.384433 |
| NA            | chrX:136741857-136743143  | 3.5741   | 2.9190   | -0.2921 | 0.368922 |
| Gm15911       | chr13:55602181-55604783   | 6.9392   | 6.0629   | -0.1948 | 0.041769 |
| Snord21       | chr5:107904554-107904648  | 98.8068  | 87.1751  | -0.1807 | 0.271925 |
| Mcm5          | chr8:75109527-75128439    | 15.0956  | 14.0435  | -0.1042 | 0.353916 |
| Hmmr          | chr11:40701394-40733422   | 0.8773   | 1.1568   | 0.3991  | 0.402590 |
| Znrf2         | chr6:54816915-54893500    | 72.7780  | 69.3219  | -0.0702 | 0.324615 |
| Atp6ap1       | chrX:74297096-74304721    | 46.0310  | 43.8179  | -0.0711 | 0.338508 |
| Gm26723       | chr12:100208987-100209814 | 29.3458  | 26.5596  | -0.1439 | 0.327703 |
| Kpna2-ps      | chr17:47620770-47622339   | 13.8183  | 12.5202  | -0.1423 | 0.359109 |
| Ppp6r3        | chr19:3454932-3575749     | 59.4821  | 63.1877  | 0.0872  | 0.047023 |
| Traj39        | chr14:54179961-54180024   | 74.1347  | 61.3458  | -0.2732 | 0.288195 |
| Ythdf2        | chr4:132184911-132212303  | 20.1710  | 21.8298  | 0.1140  | 0.116665 |
| Atmin         | chr8:116943392-116960445  | 9.9966   | 9.3604   | -0.0949 | 0.376315 |
| Mapkbp1       | chr2:119972698-120027408  | 3.1551   | 3.5444   | 0.1679  | 0.269431 |
| Arfrp1        | chr2:181357689-181365404  | 18.1624  | 19.6033  | 0.1101  | 0.104041 |
| Il12rb1       | chr8:70808448-70821424    | 3.1467   | 3.9249   | 0.3188  | 0.378958 |
| Prdx3         | chr19:60864050-60874556   | 48.9556  | 45.9670  | -0.0909 | 0.290216 |
| Bach2it1      | chr4:32251760-32265835    | 13.1216  | 16.1246  | 0.2973  | 0.352899 |
| Clk2          | chr3:89164794-89176921    | 21.9287  | 21.0778  | -0.0571 | 0.210102 |
| Bckdk         | chr7:127904081-127909664  | 15.8636  | 14.8348  | -0.0967 | 0.332671 |
| Ing1          | chr8:11556065-11563250    | 21.8877  | 20.7106  | -0.0797 | 0.263684 |
| Gse1          | chr8:120230535-120581390  | 6.9993   | 8.0272   | 0.1977  | 0.387319 |
| Lpgat1        | chr1:191717833-191784255  | 5.1208   | 5.6541   | 0.1429  | 0.232966 |
| Nfya          | chr17:48386884-48409906   | 7.5907   | 8.4574   | 0.1560  | 0.275332 |
| Gm16286       | chr18:80206764-80212741   | 41.4587  | 39.7850  | -0.0595 | 0.221911 |
| Plcg1         | chr2:160731299-160775760  | 76.4137  | 73.5682  | -0.0547 | 0.364742 |
| Pnlsr         | chr4:21847582-21876475    | 43.4442  | 46.2939  | 0.0917  | 0.073458 |
| Myo6          | chr9:80165030-80311729    | 27.5248  | 22.2573  | -0.3065 | 0.349173 |
| Gm17200       | chr9:123678095-123701046  | 3.9049   | 4.4944   | 0.2029  | 0.124074 |
| Gm16675       | chr8:46730971-46739515    | 5.9784   | 6.9739   | 0.2222  | 0.232354 |
| Zdhhc8        | chr16:18220753-18235136   | 9.1359   | 8.4492   | -0.1127 | 0.406193 |
| Fbxo11        | chr17:87990858-88065291   | 21.3383  | 23.1302  | 0.1163  | 0.197611 |
| Dnajc5        | chr2:181520484-181555133  | 41.2015  | 39.7089  | -0.0532 | 0.279128 |
| BC017158      | chr7:128271378-128298170  | 6.3878   | 5.9643   | -0.0990 | 0.330288 |
| Hps6          | chr19:46003477-46006173   | 8.1493   | 7.6081   | -0.0992 | 0.087632 |
| Wdr38         | chr2:38997475-39006168    | 2.8248   | 2.3932   | -0.2392 | 0.371720 |
| Pfn1          | chr11:70651849-70654644   | 396.6742 | 371.1641 | -0.0959 | 0.392684 |
| Mmd           | chr11:90187683-90278589   | 6.0446   | 6.8443   | 0.1793  | 0.343835 |

|                      |                           |         |         |         |          |
|----------------------|---------------------------|---------|---------|---------|----------|
| <i>Cep131</i>        | chr11:120064429-120086827 | 1.8135  | 2.0915  | 0.2058  | 0.064303 |
| <i>NA</i>            | chr10:22113049-22149270   | 2.0356  | 1.7400  | -0.2264 | 0.130320 |
| <i>Taok1</i>         | chr11:77529161-77607815   | 29.6281 | 31.8788 | 0.1056  | 0.170359 |
| <i>Fyn</i>           | chr10:39368854-39565381   | 87.1500 | 94.2166 | 0.1125  | 0.197987 |
| <i>Mief2</i>         | chr11:60728397-60732951   | 9.3243  | 8.6480  | -0.1086 | 0.312375 |
| <i>Dtnb</i>          | chr12:3572380-3781796     | 5.5822  | 6.0346  | 0.1124  | 0.067395 |
| <i>Coq6</i>          | chr12:84361656-84373796   | 7.4118  | 6.8662  | -0.1103 | 0.255033 |
| <i>Eij5</i>          | chr12:111538100-111546753 | 78.9471 | 83.8629 | 0.0871  | 0.055319 |
| <i>Hadhb</i>         | chr5:30155247-30184593    | 6.1026  | 6.6603  | 0.1262  | 0.121118 |
| <i>Cox6a1</i>        | chr5:115345641-115348981  | 96.9251 | 88.8925 | -0.1248 | 0.386762 |
| <i>Cep44</i>         | chr8:56531521-56551047    | 6.6721  | 6.2196  | -0.1013 | 0.001328 |
| <i>Rfxank</i>        | chr8:70130811-70139197    | 13.5792 | 12.6940 | -0.0973 | 0.370700 |
| <i>Wdr13</i>         | chrX:8123300-8132892      | 12.1244 | 11.4236 | -0.0859 | 0.349993 |
| <i>Tatdn1</i>        | chr15:58890152-58933730   | 8.2129  | 9.2491  | 0.1714  | 0.070738 |
| <i>Zfp623</i>        | chr15:75940951-75949377   | 9.4676  | 8.7684  | -0.1107 | 0.221799 |
| <i>Rsl1d1</i>        | chr16:11192969-11203331   | 58.4393 | 54.4092 | -0.1031 | 0.370571 |
| <i>Opa1</i>          | chr16:29579333-29654884   | 18.5581 | 17.8266 | -0.0580 | 0.227870 |
| <i>Kbtbd4</i>        | chr2:90904739-90911626    | 13.2594 | 12.5611 | -0.0781 | 0.169740 |
| <i>Tmem230</i>       | chr2:132239491-132247807  | 5.1560  | 5.7606  | 0.1600  | 0.139389 |
| <i>Smim12</i>        | chr4:127243783-127247809  | 26.5596 | 24.5096 | -0.1159 | 0.277857 |
| <i>Cyld</i>          | chr8:88697027-88751945    | 45.1352 | 47.8254 | 0.0835  | 0.070443 |
| <i>Parl</i>          | chr16:20279819-20302387   | 9.1770  | 9.9892  | 0.1223  | 0.080550 |
| <i>Yipf5</i>         | chr18:40204864-40219399   | 11.0918 | 12.3562 | 0.1557  | 0.213382 |
| <i>Psmc5</i>         | chr11:106256153-106263120 | 38.8301 | 42.8815 | 0.1432  | 0.206363 |
| <i>Sqstm1</i>        | chr11:50199365-50210827   | 74.5249 | 71.2033 | -0.0658 | 0.299666 |
| <i>Hnrnpdl</i>       | chr5:100033576-100039664  | 77.3190 | 82.4798 | 0.0932  | 0.111908 |
| <i>Lztf1</i>         | chr9:123694415-123717625  | 3.1309  | 3.4253  | 0.1297  | 0.098879 |
| <i>Setdb1</i>        | chr3:95323524-95357202    | 17.7117 | 16.9113 | -0.0667 | 0.315530 |
| <i>Elmod3</i>        | chr6:72565921-72598413    | 2.6806  | 3.0891  | 0.2046  | 0.182006 |
| <i>Zbtb18</i>        | chr1:177444660-177450760  | 12.4629 | 11.7075 | -0.0902 | 0.324218 |
| <i>Ints6</i>         | chr14:62676329-62761112   | 23.4826 | 22.0008 | -0.0940 | 0.373385 |
| <i>Acadm</i>         | chr3:153922356-153944632  | 16.7785 | 15.7788 | -0.0886 | 0.248844 |
| <i>Cep85l</i>        | chr10:53278080-53379851   | 3.2509  | 3.8163  | 0.2313  | 0.279524 |
| <i>Cnep1r1</i>       | chr8:88118768-88135110    | 7.2667  | 8.0015  | 0.1390  | 0.141669 |
| <i>Ano10</i>         | chr9:122175878-122294374  | 14.0075 | 12.9423 | -0.1141 | 0.389998 |
| <i>Abca1</i>         | chr4:53030786-53159895    | 5.2416  | 6.5154  | 0.3139  | 0.268736 |
| <i>Dhrs7b</i>        | chr11:60830630-60860195   | 5.6016  | 5.1326  | -0.1262 | 0.241519 |
| <i>Anapc11</i>       | chr11:120598420-120608198 | 7.2348  | 6.6963  | -0.1116 | 0.345212 |
| <i>Gm20531</i>       | chr6:124732167-124738040  | 32.1014 | 30.1244 | -0.0917 | 0.302807 |
| <i>Nxt2</i>          | chrX:142226769-142239692  | 1.8650  | 2.2132  | 0.2470  | 0.228991 |
| <i>Nr4a1</i>         | chr15:101266845-101274792 | 15.6855 | 17.5245 | 0.1599  | 0.271706 |
| <i>Ncoa4</i>         | chr14:32159864-32179855   | 2.7033  | 3.0235  | 0.1615  | 0.031170 |
| <i>Uchl5</i>         | chr1:14377277-143807466   | 11.6750 | 13.2215 | 0.1795  | 0.238119 |
| <i>Fbxo32</i>        | chr15:58175878-58214892   | 6.9481  | 7.6302  | 0.1351  | 0.217580 |
| <i>Cdip1</i>         | chr16:4750347-4790292     | 15.8067 | 16.9769 | 0.1030  | 0.113404 |
| <i>Tmem150a</i>      | chr6:72355446-72359762    | 4.0824  | 4.7526  | 0.2193  | 0.137179 |
| <i>Pkd1l3</i>        | chr8:109614516-109672592  | 3.2063  | 2.9854  | -0.1030 | 0.121240 |
| <i>Slc31a2</i>       | chr4:62262561-62298411    | 9.8980  | 9.2172  | -0.1028 | 0.095922 |
| <i>Fam122b</i>       | chrX:53243414-53269805    | 1.5267  | 1.7747  | 0.2172  | 0.116694 |
| <i>Abcb6</i>         | chr1:75171716-75180392    | 1.3939  | 1.6682  | 0.2591  | 0.303796 |
| <i>Rdh13</i>         | chr7:4424769-4445649      | 2.6378  | 2.4427  | -0.1108 | 0.150401 |
| <i>Rps13</i>         | chr7:116331506-116334190  | 8.4628  | 7.2625  | -0.2207 | 0.140986 |
| <i>Rpl31-ps8</i>     | chr15:90764245-90764679   | 29.1368 | 24.9269 | -0.2251 | 0.358416 |
| <i>Gm16229</i>       | chr10:12766388-127665484  | 20.3007 | 18.9085 | -0.1025 | 0.256929 |
| <i>Itpk1</i>         | chr12:102568581-102704929 | 13.7591 | 14.9993 | 0.1245  | 0.164307 |
| <i>Poc5</i>          | chr13:96388293-96415587   | 13.7034 | 12.8439 | -0.0935 | 0.284018 |
| <i>Ppm1d</i>         | chr11:85311243-85347066   | 15.3264 | 14.5209 | -0.0779 | 0.243984 |
| <i>Tmem168</i>       | chr6:13580686-13608100    | 18.0244 | 17.0983 | -0.0761 | 0.315302 |
| <i>Gm6180</i>        | chr8:42246910-42247411    | 17.2383 | 20.7636 | 0.2684  | 0.312654 |
| <i>Sertad2</i>       | chr11:20543252-20653021   | 9.4386  | 10.3608 | 0.1345  | 0.242592 |
| <i>Snd1</i>          | chr6:28475138-28935162    | 19.8942 | 19.1475 | -0.0552 | 0.360272 |
| <i>1110002L01Rik</i> | chr12:3403877-3427011     | 6.3999  | 6.0129  | -0.0900 | 0.071290 |
| <i>Atg2a</i>         | chr19:6241667-6262335     | 9.2961  | 10.6240 | 0.1926  | 0.393229 |
| <i>Slc25a16</i>      | chr10:62920632-62946498   | 5.8555  | 5.4501  | -0.1035 | 0.277628 |
| <i>Gm21970</i>       | chr16:91391720-91419451   | 40.5096 | 37.8922 | -0.0964 | 0.321211 |
| <i>Gm7008</i>        | chr12:40222757-40229184   | 6.6575  | 5.9650  | -0.1585 | 0.252272 |
| <i>Polr2f</i>        | chr15:79141350-79151774   | 35.0936 | 31.8640 | -0.1393 | 0.314801 |
| <i>Tctn1</i>         | chr5:122241286-122264460  | 8.8078  | 8.2228  | -0.0991 | 0.330422 |
| <i>Med14</i>         | chrX:12675368-12762073    | 13.0134 | 14.0584 | 0.1114  | 0.186639 |
| <i>D3Erd254e</i>     | chr3:36159521-36170335    | 3.1443  | 3.4786  | 0.1458  | 0.117067 |
| <i>Rpl27a</i>        | chr7:109519146-109522367  | 22.5171 | 21.2379 | -0.0844 | 0.292266 |

|                      |                           |          |          |         |          |
|----------------------|---------------------------|----------|----------|---------|----------|
| <i>Ptbp2</i>         | chr3:119718741-119783388  | 14.7814  | 15.9791  | 0.1124  | 0.094756 |
| <i>Tnfrsf8</i>       | chr4:63831307-63861347    | 33.7880  | 38.2208  | 0.1778  | 0.381838 |
| <i>Slc4a8</i>        | chr15:100761746-100823968 | 0.8491   | 0.9657   | 0.1857  | 0.173291 |
| <i>Prorsd1</i>       | chr11:29511756-29515033   | 6.8976   | 7.7463   | 0.1674  | 0.141049 |
| <i>U2surp</i>        | chr9:95456893-95511996    | 28.3234  | 30.3752  | 0.1009  | 0.131677 |
| <i>2810002D19Rik</i> | chr2:94406150-94411682    | 7.0199   | 6.3668   | -0.1409 | 0.266016 |
| <i>Gas8</i>          | chr8:123518834-123536649  | 4.0405   | 3.5175   | -0.2000 | 0.261840 |
| <i>Hk1</i>           | chr10:62268854-62379908   | 18.7310  | 20.1877  | 0.1080  | 0.165996 |
| <i>Pcna</i>          | chr2:132249161-132253314  | 35.3975  | 33.2137  | -0.0919 | 0.325717 |
| <i>Chmp1a</i>        | chr8:123204263-123212763  | 29.2678  | 27.6316  | -0.0830 | 0.339937 |
| <i>Cyth4</i>         | chr15:78597046-78622019   | 70.8540  | 68.4029  | -0.0508 | 0.173809 |
| <i>Celf2</i>         | chr2:6539693-7509563      | 8.7623   | 9.3436   | 0.0927  | 0.111551 |
| <i>Mief1</i>         | chr15:80234079-80253366   | 14.3538  | 13.7066  | -0.0666 | 0.304220 |
| <i>4930565N06Rik</i> | chr16:36880518-36897189   | 1.7818   | 2.3034   | 0.3705  | 0.404532 |
| <i>Wsb1</i>          | chr11:79239371-79254671   | 21.0875  | 22.5553  | 0.0971  | 0.050483 |
| <i>Aspscr1</i>       | chr11:120672972-120709447 | 12.4368  | 11.8402  | -0.0709 | 0.279703 |
| <i>Zfp874a</i>       | chr13:67424548-67451624   | 6.3616   | 7.0687   | 0.1521  | 0.247266 |
| <i>Slc25a13</i>      | chr6:6041217-6217118      | 1.6059   | 1.9465   | 0.2775  | 0.286743 |
| <i>E330009J07Rik</i> | chr6:40401374-40436135    | 19.0743  | 18.0011  | -0.0835 | 0.365996 |
| <i>Gm26628</i>       | chr6:71961144-71963775    | 5.8114   | 5.2003   | -0.1603 | 0.280581 |
| <i>Lyrn5</i>         | chr6:145211133-145216939  | 10.2456  | 11.2851  | 0.1394  | 0.158586 |
| <i>Prpf40b</i>       | chr15:99259086-99317018   | 3.1114   | 3.5322   | 0.1830  | 0.250037 |
| <i>Noc3l</i>         | chr19:38788127-38819237   | 11.6390  | 11.0981  | -0.0687 | 0.039203 |
| <i>Hnrnpu</i>        | chr1:178323073-178337797  | 150.7286 | 160.9655 | 0.0948  | 0.108514 |
| <i>Srpk2</i>         | chr5:23503355-23616571    | 26.2893  | 25.2144  | -0.0602 | 0.244071 |
| <i>Rnf4</i>          | chr5:34336288-34355629    | 26.1654  | 25.2793  | -0.0497 | 0.176818 |
| <i>Trbv4</i>         | chr6:41059442-41059881    | 67.6958  | 75.5428  | 0.1582  | 0.216471 |
| <i>Rad23a</i>        | chr8:84834018-84840665    | 40.5419  | 38.1073  | -0.0893 | 0.364610 |
| <i>Fem1b</i>         | chr9:62791831-62811648    | 21.1846  | 20.4580  | -0.0504 | 0.213928 |
| <i>Ccpg1</i>         | chr9:72985428-73016340    | 24.7687  | 23.7949  | -0.0579 | 0.317633 |
| <i>Lmf1</i>          | chr17:25579173-25662826   | 1.4135   | 1.5974   | 0.1764  | 0.250800 |
| <i>Lonp1</i>         | chr17:56614300-56626903   | 30.7708  | 29.3471  | -0.0683 | 0.350426 |
| <i>Vps13a</i>        | chr19:16616762-16780822   | 38.1375  | 40.6264  | 0.0912  | 0.121325 |
| <i>Arl8b</i>         | chr6:108783058-108823723  | 32.6426  | 31.0698  | -0.0712 | 0.263693 |
| <i>Gm7964</i>        | chr7:83755903-83757356    | 6.3731   | 7.2410   | 0.1842  | 0.091370 |
| <i>2810417H13Rik</i> | chr9:65890236-65903266    | 1.6534   | 2.0717   | 0.3253  | 0.401407 |
| <i>Mterf4</i>        | chr1:93299210-93305915    | 6.1591   | 5.7659   | -0.0952 | 0.227298 |
| <i>Hist2h2bb</i>     | chr3:96269720-96279001    | 35.8877  | 44.5396  | 0.3116  | 0.280577 |
| <i>Gm26790</i>       | chr7:35772377-35779168    | 8.5323   | 9.4454   | 0.1467  | 0.109116 |
| <i>C2cd2l</i>        | chr9:44309236-44320282    | 5.8771   | 5.3199   | -0.1437 | 0.430349 |
| <i>Slc12a6</i>       | chr2:112265824-112363163  | 28.4576  | 30.5990  | 0.1047  | 0.216794 |
| <i>Trmt10a</i>       | chr3:138143447-138159821  | 1.5715   | 1.7672   | 0.1693  | 0.094698 |
| <i>Sfswap</i>        | chr5:129501230-129571383  | 31.7969  | 30.2539  | -0.0718 | 0.369706 |
| <i>2700029M09Rik</i> | chr8:60890417-60907580    | 13.7448  | 15.4259  | 0.1665  | 0.253004 |
| <i>Zpr1</i>          | chr9:46273063-46282643    | 25.2794  | 24.2196  | -0.0618 | 0.221709 |
| <i>Arfgef2</i>       | chr2:166805587-166898052  | 11.0735  | 11.9314  | 0.1076  | 0.153996 |
| <i>Pydc3</i>         | chr1:173673674-173698392  | 36.5835  | 39.2096  | 0.1000  | 0.155239 |
| <i>Prss12</i>        | chr3:123446912-123506602  | 2.1122   | 2.5204   | 0.2549  | 0.195837 |
| <i>Drg2</i>          | chr11:60454590-60468754   | 16.0221  | 15.1099  | -0.0846 | 0.271089 |
| <i>Lrrc45</i>        | chr11:120713924-120721128 | 13.6156  | 12.7487  | -0.0949 | 0.344690 |
| <i>Sec23a</i>        | chr12:58958382-59012017   | 12.7717  | 12.0374  | -0.0854 | 0.316985 |
| <i>Camkk2</i>        | chr5:122731172-122779410  | 9.2724   | 8.6634   | -0.0980 | 0.336976 |
| <i>Abhd11</i>        | chr5:135009151-135012175  | 17.6151  | 16.4502  | -0.0987 | 0.310653 |
| <i>Pcolce</i>        | chr5:137605102-137613784  | 3.4203   | 3.1124   | -0.1361 | 0.261341 |
| <i>Mrps25</i>        | chr6:92169524-92184033    | 20.0913  | 19.2362  | -0.0627 | 0.354386 |
| <i>Mboat7</i>        | chr7:3677789-3693523      | 6.7959   | 7.3992   | 0.1227  | 0.203363 |
| <i>Apoe</i>          | chr7:19696108-19699166    | 4.3750   | 5.5943   | 0.3547  | 0.453063 |
| <i>Rab11fip1</i>     | chr8:27138772-27174646    | 7.8154   | 7.4219   | -0.0745 | 0.322745 |
| <i>Fto</i>           | chr8:91313531-91668439    | 3.7366   | 4.2274   | 0.1780  | 0.367191 |
| <i>Sin3a</i>         | chr9:57072039-57128366    | 28.0041  | 30.2990  | 0.1136  | 0.204445 |
| <i>Cep162</i>        | chr9:87189572-87255536    | 4.0134   | 4.3695   | 0.1226  | 0.103283 |
| <i>Sat1</i>          | chrX:155213131-155216449  | 32.8748  | 36.0116  | 0.1315  | 0.237984 |
| <i>Drosha</i>        | chr15:12824814-12935290   | 8.0761   | 7.6821   | -0.0722 | 0.230956 |
| <i>Matn2</i>         | chr15:34306679-34436242   | 1.5470   | 1.8548   | 0.2618  | 0.302301 |
| <i>Traj2</i>         | chr14:54217835-54217901   | 108.9495 | 127.6933 | 0.2290  | 0.239303 |
| <i>Ifnar1</i>        | chr16:91485237-91507441   | 51.4024  | 49.7247  | -0.0479 | 0.326043 |
| <i>Actr3</i>         | chr1:125392904-125435727  | 143.7812 | 135.4918 | -0.0857 | 0.377182 |
| <i>Slamf6</i>        | chr1:171917536-171943868  | 76.2826  | 84.1582  | 0.1417  | 0.314064 |
| <i>Mfap1b</i>        | chr2:121460234-121474067  | 5.6459   | 6.3003   | 0.1582  | 0.198018 |
| <i>Edem2</i>         | chr2:155701676-155729475  | 17.2040  | 16.2445  | -0.0828 | 0.365101 |
| <i>Uckl1</i>         | chr2:181569148-181584892  | 21.9267  | 20.8698  | -0.0713 | 0.335680 |

|                      |                           |           |           |         |          |
|----------------------|---------------------------|-----------|-----------|---------|----------|
| <i>Gm128</i>         | chr3:95236919-95241598    | 3.6256    | 4.2643    | 0.2341  | 0.239062 |
| <i>lfi44</i>         | chr3:151730921-151749947  | 0.7203    | 1.3247    | 0.8791  | 0.358152 |
| <i>Ubxn2b</i>        | chr4:6191097-621688       | 6.4810    | 6.1525    | -0.0750 | 0.134173 |
| <i>Tln1</i>          | chr4:43531518-43562691    | 115.8090  | 111.2943  | -0.0574 | 0.374351 |
| <i>Ago1</i>          | chr4:126435011-126468583  | 9.5968    | 10.5425   | 0.1356  | 0.256533 |
| <i>Cry1</i>          | chr10:85131701-85185054   | 17.4414   | 16.2496   | -0.1021 | 0.376485 |
| <i>Rab10os</i>       | chr12:3235503-3250377     | 12.3937   | 13.4670   | 0.1198  | 0.169804 |
| <i>Aaed1</i>         | chr13:64291835-64312710   | 27.3937   | 24.8406   | -0.1411 | 0.369687 |
| <i>Polr1a</i>        | chr6:71909052-71979356    | 28.3797   | 27.1358   | -0.0647 | 0.352281 |
| <i>Spast</i>         | chr17:74338986-74391113   | 19.4042   | 18.2087   | -0.0917 | 0.399424 |
| <i>Gm16541</i>       | chr19:42536849-42563108   | 10.4820   | 11.9332   | 0.1871  | 0.015578 |
| <i>Ivns1abp</i>      | chr1:151344497-151364445  | 69.9632   | 66.5423   | -0.0723 | 0.361457 |
| <i>Runx3</i>         | chr4:135120651-135177990  | 3.2109    | 3.7102    | 0.2085  | 0.325149 |
| <i>Snora70</i>       | chrX:74272483-74272620    | 30.3362   | 35.9198   | 0.2437  | 0.031899 |
| <i>Cant1</i>         | chr11:118406288-118419086 | 17.3845   | 16.4932   | -0.0759 | 0.379367 |
| <i>Ngfrap1</i>       | chrX:136270252-136271978  | 18.5372   | 21.1039   | 0.1871  | 0.276393 |
| <i>Cog1</i>          | chr11:113649168-113667054 | 18.3001   | 17.4946   | -0.0649 | 0.323069 |
| <i>Narf</i>          | chr11:121237252-121255856 | 17.8661   | 16.6552   | -0.1012 | 0.404303 |
| <i>Zfp810</i>        | chr9:22276747-22307638    | 12.7106   | 14.0593   | 0.1455  | 0.246240 |
| <i>1110059E24Rik</i> | chr19:21581201-21652976   | 6.2150    | 7.0929    | 0.1906  | 0.309061 |
| <i>Gm16586</i>       | chr1:178321107-178324171  | 93.5333   | 88.9798   | -0.0720 | 0.372278 |
| <i>Pma5</i>          | chr3:108256925-108279974  | 9.9750    | 8.8616    | -0.1707 | 0.313116 |
| <i>2310033P09Rik</i> | chr11:59208320-59210738   | 22.7750   | 21.4235   | -0.0883 | 0.175684 |
| <i>Ntan1</i>         | chr16:13819250-13835451   | 31.4335   | 29.5576   | -0.0888 | 0.339415 |
| <i>Prkd3</i>         | chr17:78949404-79020816   | 20.4372   | 19.3366   | -0.0799 | 0.381845 |
| <i>Aida</i>          | chr1:183297059-183324501  | 8.3835    | 9.2938    | 0.1487  | 0.227779 |
| <i>Pdp1</i>          | chr4:11958183-11966452    | 7.0449    | 7.8074    | 0.1483  | 0.229962 |
| <i>Faf1</i>          | chr4:109676587-109963960  | 15.9885   | 15.2698   | -0.0663 | 0.211393 |
| <i>Sec23ip</i>       | chr7:128744869-128784836  | 19.5069   | 18.7809   | -0.0547 | 0.180438 |
| <i>Aaas</i>          | chr15:102338246-102350759 | 18.6641   | 17.5125   | -0.0919 | 0.259652 |
| <i>Gm4876</i>        | chr6:17065009-17171833    | 5.1557    | 5.8843    | 0.1907  | 0.296054 |
| <i>Tdg</i>           | chr10:82629827-82650799   | 1.8457    | 2.0964    | 0.1838  | 0.103360 |
| <i>A230072E10Rik</i> | chrX:151291973-151344846  | 2.9026    | 2.6751    | -0.1177 | 0.273172 |
| <i>Gbp9</i>          | chr5:105078393-105139539  | 73.4499   | 80.7863   | 0.1373  | 0.306012 |
| <i>Gps2</i>          | chr11:69913887-69916591   | 50.9737   | 48.7406   | -0.0646 | 0.209475 |
| <i>Arhgap27os3</i>   | chr11:103344752-103350124 | 14.6502   | 16.3223   | 0.1559  | 0.309641 |
| <i>Isca1</i>         | chr13:59755408-59769810   | 3.7983    | 4.3007    | 0.1792  | 0.225890 |
| <i>Scarna10</i>      | chr6:125186358-125186683  | 3821.5951 | 3460.9124 | -0.1430 | 0.434294 |
| <i>Zfp59</i>         | chr7:27842854-27855086    | 4.7816    | 4.2012    | -0.1867 | 0.347436 |
| <i>6030458C11Rik</i> | chr15:12808176-12824657   | 13.8363   | 13.2370   | -0.0639 | 0.119917 |
| <i>Pdia3</i>         | chr2:121413774-121438687  | 76.2237   | 81.1938   | 0.0911  | 0.109442 |
| <i>Stard3nl</i>      | chr13:19357676-19395752   | 10.2059   | 9.2546    | -0.1412 | 0.248226 |
| <i>Nxt1</i>          | chr2:148672600-148676027  | 13.5270   | 12.3360   | -0.1330 | 0.227150 |
| <i>Kat2a</i>         | chr11:100704745-100712465 | 14.8243   | 14.0735   | -0.0750 | 0.263085 |
| <i>Mndal</i>         | chr1:173857220-173942491  | 173.6654  | 187.7346  | 0.1124  | 0.240377 |
| <i>Gm4759</i>        | chr7:106421549-106441073  | 96.5198   | 104.0677  | 0.1086  | 0.244253 |
| <i>Dclre1b</i>       | chr3:103800604-103809444  | 4.2007    | 4.5711    | 0.1219  | 0.085621 |
| <i>Ube4bos1</i>      | chr4:149347884-149365277  | 2.8178    | 3.2512    | 0.2064  | 0.152479 |
| <i>Eml2</i>          | chr7:19176420-19206482    | 4.3369    | 4.8606    | 0.1645  | 0.207108 |
| <i>Josd1</i>         | chr15:79674249-79687872   | 10.1784   | 9.6188    | -0.0816 | 0.135689 |
| <i>Ccdc64</i>        | chr5:115648174-115731621  | 25.1597   | 24.1880   | -0.0568 | 0.332111 |
| <i>Sbp</i>           | chr5:33634951-33652574    | 12.3254   | 11.4659   | -0.1043 | 0.361516 |
| <i>Vamp5</i>         | chr6:72368048-72380468    | 3.9738    | 4.6368    | 0.2226  | 0.203573 |
| <i>Rbbp6</i>         | chr7:122965685-123002557  | 22.8091   | 24.7356   | 0.1170  | 0.233773 |
| <i>Rfc4</i>          | chr16:23113942-23127737   | 9.3495    | 10.6512   | 0.1881  | 0.266930 |
| <i>Hif1a</i>         | chr12:73901374-73947530   | 44.1856   | 53.4276   | 0.2740  | 0.304651 |
| <i>Cdc42ep4</i>      | chr11:113726849-113751881 | 2.1461    | 1.8993    | -0.1762 | 0.271146 |
| <i>Tgtp1</i>         | chr11:48985326-48994172   | 29.5418   | 27.7653   | -0.0895 | 0.400209 |
| <i>Kif13b</i>        | chr14:64652530-64806296   | 11.6032   | 12.8162   | 0.1434  | 0.310088 |
| <i>Zfp39</i>         | chr11:58888152-58904225   | 12.1058   | 13.3508   | 0.1412  | 0.233344 |
| <i>Myo5a</i>         | chr9:75071014-75223688    | 2.7555    | 3.0494    | 0.1462  | 0.265871 |
| <i>Gsr</i>           | chr8:33652522-33698163    | 14.5237   | 13.6570   | -0.0888 | 0.267929 |
| <i>Erp29</i>         | chr5:121428589-121452506  | 12.1034   | 11.6111   | -0.0599 | 0.223405 |
| <i>Spata13</i>       | chr14:60634000-60764556   | 49.0146   | 46.9506   | -0.0621 | 0.406261 |
| <i>Slc4a1ap</i>      | chr5:31526994-31554042    | 15.9619   | 15.3297   | -0.0583 | 0.115070 |
| <i>E430025E21Rik</i> | chr15:59331997-59374167   | 14.5817   | 15.6310   | 0.1003  | 0.058860 |
| <i>Fam102a</i>       | chr2:32535331-32569756    | 53.9595   | 51.1032   | -0.0785 | 0.437255 |
| <i>Hrh2</i>          | chr13:54192128-5422432    | 3.7000    | 4.2838    | 0.2113  | 0.280585 |
| <i>Hdhd2</i>         | chr18:76930125-76972902   | 9.4026    | 8.7535    | -0.1032 | 0.338837 |
| <i>Ccdc97</i>        | chr7:25711105-25719088    | 6.7131    | 7.5199    | 0.1637  | 0.283282 |
| <i>Egr2</i>          | chr10:67535474-67542188   | 10.5919   | 11.7953   | 0.1553  | 0.287154 |

|                      |                           |          |         |         |          |
|----------------------|---------------------------|----------|---------|---------|----------|
| <i>Ogdh</i>          | chr11:6291632-6356642     | 34.3348  | 37.0947 | 0.1115  | 0.228769 |
| <i>Man2b2</i>        | chr5:36806920-36830653    | 11.3260  | 12.6226 | 0.1564  | 0.317730 |
| <i>Gosr1</i>         | chr11:76726601-76763579   | 23.4032  | 22.4601 | -0.0593 | 0.213977 |
| <i>Napa</i>          | chr7:16098457-16117975    | 25.2909  | 24.1916 | -0.0641 | 0.251647 |
| <i>Klf7</i>          | chr1:64029446-64122282    | 7.6056   | 8.4076  | 0.1446  | 0.293961 |
| <i>Trmt11</i>        | chr10:30534224-30600749   | 10.7922  | 11.9849 | 0.1512  | 0.240035 |
| <i>Z310022B05Rik</i> | chr8:124635765-124663369  | 1.3256   | 1.5893  | 0.2617  | 0.197874 |
| <i>Pttg1</i>         | chr11:43420249-43426251   | 15.9531  | 17.7539 | 0.1543  | 0.252797 |
| <i>Sgcb</i>          | chr5:73632748-73647713    | 3.5657   | 4.0095  | 0.1692  | 0.165855 |
| <i>Il17ra</i>        | chr6:120463196-120483727  | 100.8760 | 95.7385 | -0.0754 | 0.463675 |
| <i>Ncstn</i>         | chr1:172066012-172082795  | 14.1480  | 15.3670 | 0.1192  | 0.203471 |
| <i>Nek3</i>          | chr8:22128282-22166435    | 4.2775   | 3.8533  | -0.1506 | 0.144007 |
| <i>Mars2</i>         | chr1:55237176-55240058    | 15.7773  | 14.8855 | -0.0839 | 0.332201 |
| <i>Mrps11</i>        | chr7:78783118-78792989    | 6.7565   | 6.1861  | -0.1273 | 0.220046 |
| <i>Rbmx1</i>         | chr8:78505270-78508928    | 3.4168   | 3.9670  | 0.2154  | 0.110965 |
| <i>B3gnt5</i>        | chr16:19760207-19772753   | 4.8041   | 5.4003  | 0.1688  | 0.302811 |
| <i>Alas1</i>         | chr9:106233454-106248126  | 7.3654   | 6.9251  | -0.0889 | 0.222389 |
| <i>Wdr36</i>         | chr18:32837224-32866420   | 28.5861  | 27.2068 | -0.0713 | 0.299676 |
| <i>Arsk</i>          | chr13:76060421-76098660   | 3.5316   | 3.2703  | -0.1109 | 0.231995 |
| <i>Emilin1</i>       | chr5:30913401-30921278    | 1.1897   | 1.4003  | 0.2351  | 0.200416 |
| <i>Impdh1</i>        | chr6:29200433-29216364    | 29.7528  | 27.9874 | -0.0883 | 0.391633 |
| <i>Cic</i>           | chr7:25267703-25294159    | 9.5739   | 10.9401 | 0.1924  | 0.418359 |
| <i>Lrrc51</i>        | chr7:101912983-101933895  | 4.1487   | 4.9266  | 0.2479  | 0.205410 |
| <i>Mrpl23</i>        | chr7:142532798-142540747  | 2.7220   | 2.3714  | -0.1989 | 0.073620 |
| <i>1190002N15Rik</i> | chr9:94517863-94538081    | 8.7052   | 8.1664  | -0.0922 | 0.307677 |
| <i>Gm17638</i>       | chr15:77961673-77967126   | 25.7104  | 24.6605 | -0.0601 | 0.276586 |
| <i>Cyp4f13</i>       | chr17:32924687-32947402   | 7.6343   | 8.5853  | 0.1694  | 0.273667 |
| <i>Pgap1</i>         | chr1:54472999-54557684    | 9.1339   | 8.5807  | -0.0901 | 0.396120 |
| <i>Tsc1</i>          | chr2:28641227-28691167    | 7.9783   | 7.5817  | -0.0736 | 0.395154 |
| <i>Dcaf10</i>        | chr4:45342100-45379759    | 6.9941   | 7.5698  | 0.1141  | 0.133904 |
| <i>Toe1</i>          | chr4:116794309-116807640  | 16.0471  | 15.2702 | -0.0716 | 0.177747 |
| <i>Tmed4</i>         | chr11:6270368-6274870     | 17.8163  | 16.8376 | -0.0815 | 0.228728 |
| <i>Mrps17</i>        | chr5:129715496-129718875  | 25.7715  | 23.7780 | -0.1162 | 0.375275 |
| <i>Fam32a</i>        | chr8:72219729-72223764    | 59.3973  | 55.1512 | -0.1070 | 0.409514 |
| <i>Nme3</i>          | chr17:24896499-24897522   | 21.3957  | 19.4139 | -0.1402 | 0.362639 |
| <i>Rnf168</i>        | chr16:32277458-32301434   | 15.2139  | 14.4536 | -0.0740 | 0.290291 |
| <i>Rps6kc1</i>       | chr1:190700201-190911770  | 1.5565   | 1.7745  | 0.1891  | 0.287654 |
| <i>Ybx1</i>          | chr4:119277980-119294604  | 67.9817  | 63.5655 | -0.0969 | 0.390998 |
| <i>Coasy</i>         | chr11:101082564-101086619 | 9.2157   | 8.6628  | -0.0893 | 0.181144 |
| <i>Oxr1</i>          | chr15:41447481-41861048   | 23.3220  | 21.9196 | -0.0895 | 0.373528 |
| <i>Sag</i>           | chr1:87803679-87845158    | 0.9509   | 1.1087  | 0.2215  | 0.259442 |
| <i>Actg1</i>         | chr11:120345689-120348542 | 14.2478  | 13.3657 | -0.0922 | 0.311175 |
| <i>Dbr1</i>          | chr9:99575798-99584463    | 15.5250  | 14.5707 | -0.0915 | 0.264235 |
| <i>Mark2</i>         | chr19:7275395-7341860     | 17.0526  | 18.8257 | 0.1427  | 0.327038 |
| <i>Cd226</i>         | chr18:89197430-89270201   | 40.1963  | 37.7902 | -0.0891 | 0.376865 |
| <i>Rpl18a</i>        | chr8:70894721-70897443    | 60.0983  | 67.3754 | 0.1649  | 0.321553 |
| <i>Cramp1l</i>       | chr17:24961227-25015230   | 5.4457   | 6.1263  | 0.1699  | 0.359202 |
| <i>Kansl2</i>        | chr15:98518820-98534244   | 6.2664   | 5.7442  | -0.1255 | 0.214702 |
| <i>Traf3ip1</i>      | chr1:91494667-91529303    | 3.8539   | 4.2990  | 0.1577  | 0.094363 |
| <i>Gorasp1</i>       | chr9:119925672-119937558  | 7.3224   | 8.0205  | 0.1314  | 0.099297 |
| <i>Jmjd4</i>         | chr11:59450044-59458567   | 7.4482   | 7.0903  | -0.0710 | 0.299238 |
| <i>Abcd1</i>         | chrX:73716596-73738534    | 9.6524   | 10.7628 | 0.1571  | 0.315459 |
| <i>NA</i>            | chr15:76721465-76723845   | 12.2224  | 11.2938 | -0.1140 | 0.298750 |
| <i>Dgcr14</i>        | chr16:17900710-17911348   | 17.7066  | 16.8949 | -0.0677 | 0.223615 |
| <i>Skap1</i>         | chr11:96464592-96759130   | 57.7979  | 55.0695 | -0.0698 | 0.366923 |
| <i>Zmynd8</i>        | chr2:165784151-165899016  | 12.1333  | 13.1834 | 0.1197  | 0.278361 |
| <i>mt-Te</i>         | chrM:14070-14139          | 52.9137  | 63.0083 | 0.2519  | 0.032390 |
| <i>Uchl3</i>         | chr14:101653966-101696124 | 17.2293  | 19.4788 | 0.1770  | 0.284043 |
| <i>Elmo1</i>         | chr13:20090506-20608353   | 17.9729  | 19.6300 | 0.1272  | 0.323248 |
| <i>Rsrc2</i>         | chr5:123728425-123749414  | 38.1245  | 36.5761 | -0.0598 | 0.339599 |
| <i>Kntc1</i>         | chr5:123749725-123821593  | 0.7502   | 0.9010  | 0.2642  | 0.305679 |
| <i>Tirap</i>         | chr9:35184550-35200291    | 0.7538   | 0.9212  | 0.2894  | 0.256007 |
| <i>Mtdh</i>          | chr15:34082693-34142386   | 14.8051  | 15.7237 | 0.0868  | 0.074336 |
| <i>Tnks2</i>         | chr19:36834231-36893477   | 53.9414  | 51.8121 | -0.0581 | 0.351264 |
| <i>AU022252</i>      | chr4:119203569-119232712  | 4.1898   | 3.9459  | -0.0865 | 0.345034 |
| <i>Fbxl12</i>        | chr9:20618117-20644767    | 9.6326   | 10.5656 | 0.1334  | 0.239395 |
| <i>Tubg1</i>         | chr11:101119937-101126419 | 6.1877   | 5.5925  | -0.1459 | 0.328203 |
| <i>Alg8</i>          | chr7:97371605-97392153    | 3.8419   | 3.4439  | -0.1577 | 0.313434 |
| <i>Gpr108</i>        | chr17:57234913-57247641   | 26.0375  | 24.8598 | -0.0668 | 0.278582 |
| <i>Yars2</i>         | chr16:16302964-16309640   | 8.1902   | 7.6956  | -0.0899 | 0.123082 |
| <i>Ltbp3</i>         | chr19:5740903-5758532     | 1.2589   | 1.0803  | -0.2208 | 0.341172 |

|                      |                           |          |         |         |          |
|----------------------|---------------------------|----------|---------|---------|----------|
| <i>Dctn3</i>         | chr4:41714797-41723170    | 29.0355  | 26.8391 | -0.1135 | 0.327924 |
| <i>Vapb</i>          | chr2:173737510-173784336  | 8.7992   | 8.3948  | -0.0679 | 0.204591 |
| <i>Snord32a</i>      | chr7:45127381-45127464    | 103.4985 | 92.0021 | -0.1699 | 0.296021 |
| <i>Atr</i>           | chr9:95857596-95951644    | 19.0085  | 18.1602 | -0.0659 | 0.367632 |
| <i>Ogg1</i>          | chr6:113326971-113335068  | 6.5555   | 6.0252  | -0.1217 | 0.076411 |
| <i>Zdhhc6</i>        | chr19:55298300-55316032   | 18.6454  | 17.6920 | -0.0757 | 0.269660 |
| <i>Gm2000</i>        | chr1:156366039-156366484  | 9.9768   | 7.9293  | -0.3314 | 0.417517 |
| <i>Emc4</i>          | chr2:112363010-112368027  | 14.3818  | 16.0022 | 0.1540  | 0.131005 |
| <i>Daam1</i>         | chr12:71831077-71992367   | 5.5545   | 6.0237  | 0.1170  | 0.095515 |
| <i>Btbd10</i>        | chr7:113315625-113369392  | 5.0076   | 4.6554  | -0.1052 | 0.324480 |
| <i>Agpat5</i>        | chr8:18846276-18891361    | 3.0301   | 2.8627  | -0.0820 | 0.220111 |
| <i>Rchy1</i>         | chr5:91948903-91963068    | 17.6494  | 18.9631 | 0.1036  | 0.039364 |
| <i>Psmc8</i>         | chr7:29174187-29180701    | 90.1746  | 82.7703 | -0.1236 | 0.420531 |
| <i>Zfp84</i>         | chr7:29768551-29779821    | 18.9202  | 17.9112 | -0.0791 | 0.311439 |
| <i>Podnl1</i>        | chr8:84125988-84132527    | 5.9163   | 8.4449  | 0.5134  | 0.331613 |
| <i>U2af1</i>         | chr17:31647081-31658754   | 21.4609  | 23.6479 | 0.1400  | 0.166963 |
| <i>Pacs1</i>         | chr19:5133687-5273119     | 15.4944  | 17.2323 | 0.1534  | 0.345995 |
| <i>Prex1</i>         | chr2:166566341-166713832  | 31.1593  | 34.0579 | 0.1283  | 0.309143 |
| <i>Snx16</i>         | chr3:10417818-10440124    | 2.2911   | 2.6613  | 0.2161  | 0.131008 |
| <i>Eci2</i>          | chr13:34977747-35027094   | 13.6856  | 12.8336 | -0.0927 | 0.323782 |
| <i>Snx13</i>         | chr12:35047188-35147469   | 8.3559   | 9.0669  | 0.1178  | 0.212240 |
| <i>Pgam5</i>         | chr5:110259129-110269913  | 25.5090  | 24.0003 | -0.0880 | 0.364943 |
| <i>Ecsit</i>         | chr9:22072245-22085438    | 22.3608  | 21.0662 | -0.0860 | 0.297737 |
| <i>Zfp599</i>        | chr9:22247429-22259895    | 3.5008   | 3.9264  | 0.1655  | 0.131578 |
| <i>Snx3</i>          | chr10:42502029-42535381   | 48.2643  | 44.3722 | -0.1213 | 0.408939 |
| <i>Lsm1</i>          | chr8:25785590-25803975    | 12.9333  | 12.0809 | -0.0984 | 0.268572 |
| <i>Ppm1m</i>         | chr9:106194171-106199746  | 22.1900  | 21.2669 | -0.0613 | 0.255068 |
| <i>Gm11579</i>       | chr1:60776664-60781834    | 7.7958   | 9.1065  | 0.2242  | 0.198111 |
| <i>Cat</i>           | chr2:103453848-103485160  | 39.8346  | 37.9436 | -0.0702 | 0.314849 |
| <i>Slc35e2</i>       | chr4:155601415-155623340  | 17.8177  | 17.1852 | -0.0521 | 0.216633 |
| <i>P4hb</i>          | chr11:120560297-120573253 | 79.2985  | 76.9537 | -0.0433 | 0.228013 |
| <i>Gm10135</i>       | chr5:72965807-72974702    | 62.6921  | 58.1536 | -0.1084 | 0.077564 |
| <i>Ccdc61</i>        | chr7:18890882-18910415    | 8.9611   | 8.3196  | -0.1072 | 0.245828 |
| <i>C130036L24Rik</i> | chr1:86359573-86373791    | 2.8327   | 2.5478  | -0.1529 | 0.276397 |
| <i>Rab33b</i>        | chr3:51483965-51495905    | 17.9977  | 17.1256 | -0.0717 | 0.245061 |
| <i>Hist2h2ac</i>     | chr3:96220360-96220880    | 71.8699  | 65.3277 | -0.1377 | 0.402497 |
| <i>Rragd</i>         | chr4:32983036-33022180    | 1.6749   | 1.4923  | -0.1666 | 0.262544 |
| <i>5430405H02Rik</i> | chr2:156852429-156862945  | 5.8568   | 6.6981  | 0.1936  | 0.164353 |
| <i>Gabrr2</i>        | chr4:33062998-33095865    | 5.4184   | 4.8933  | -0.1471 | 0.287206 |
| <i>Esr1</i>          | chr10:4611592-5005614     | 0.4886   | 0.5807  | 0.2492  | 0.321283 |
| <i>Psmc2</i>         | chr5:21785282-21803787    | 11.7200  | 12.7383 | 0.1202  | 0.181880 |
| <i>Sfmbt1</i>        | chr14:30714848-30822713   | 2.0470   | 2.2874  | 0.1602  | 0.180741 |
| <i>Aspm</i>          | chr1:139454772-139494090  | 0.9421   | 1.2834  | 0.4459  | 0.302526 |
| <i>G3bp2</i>         | chr5:92052145-92083735    | 62.9192  | 60.3130 | -0.0610 | 0.338593 |
| <i>Ercc1</i>         | chr7:19344777-19356524    | 10.3519  | 9.7808  | -0.0819 | 0.152398 |
| <i>Zfp61</i>         | chr7:24291038-24301232    | 5.1237   | 4.6526  | -0.1391 | 0.343946 |
| <i>Nrm</i>           | chr17:35861317-35865402   | 15.7997  | 14.6117 | -0.1128 | 0.345480 |
| <i>Ufd1l</i>         | chr16:18811778-18835261   | 17.3845  | 18.6719 | 0.1031  | 0.116353 |
| <i>Etf1</i>          | chr18:34902784-34932007   | 59.3111  | 56.3084 | -0.0750 | 0.375240 |
| <i>Gm4841</i>        | chr18:60268300-60273267   | 1.7072   | 2.5837  | 0.5978  | 0.276289 |
| <i>NA</i>            | chr2:3504528-3512759      | 8.5604   | 8.0964  | -0.0804 | 0.268981 |
| <i>Pum1</i>          | chr4:130663320-130781564  | 29.0397  | 28.1380 | -0.0455 | 0.313726 |
| <i>Klhl17</i>        | chr4:156229043-156234857  | 16.9622  | 16.0246 | -0.0820 | 0.358920 |
| <i>Kri1</i>          | chr9:21273457-21287971    | 58.6013  | 62.6972 | 0.0975  | 0.146411 |
| <i>Ddx31</i>         | chr2:28840405-28905571    | 12.5668  | 11.9630 | -0.0710 | 0.234360 |
| <i>Cracr2a</i>       | chr6:127577974-127629938  | 13.6604  | 15.3340 | 0.1667  | 0.238619 |
| <i>Sox4</i>          | chr13:28948918-28953713   | 10.6596  | 9.8635  | -0.1120 | 0.401173 |
| <i>Glrx5</i>         | chr12:105032688-105040910 | 26.8703  | 24.6995 | -0.1215 | 0.365315 |
| <i>Ccny</i>          | chr18:9314043-9450150     | 41.3241  | 39.1509 | -0.0779 | 0.357714 |
| <i>Rap1gds1</i>      | chr3:138925905-139075199  | 36.4103  | 38.8391 | 0.0932  | 0.065346 |
| <i>Ptprf</i>         | chr4:118208212-118291405  | 0.8837   | 0.7838  | -0.1730 | 0.334867 |
| <i>O610009L18Rik</i> | chr11:120348677-120351190 | 9.4548   | 8.2830  | -0.1909 | 0.159459 |
| <i>5031425E22Rik</i> | chr5:23431809-23433919    | 34.0849  | 32.6479 | -0.0621 | 0.287138 |
| <i>Gm15751</i>       | chr5:123508394-123514011  | 11.3803  | 10.5327 | -0.1117 | 0.283446 |
| <i>Hmgb1</i>         | chr5:149046701-149053513  | 8.1484   | 8.8073  | 0.1122  | 0.086751 |
| <i>Lyrr1</i>         | chr7:119895860-119916756  | 3.4416   | 3.9976  | 0.2160  | 0.084470 |
| <i>Cdyl2</i>         | chr8:116568723-116732991  | 6.7555   | 6.4125  | -0.0752 | 0.359217 |
| <i>Lrrc1</i>         | chr9:77430822-77544059    | 15.2289  | 13.9748 | -0.1240 | 0.413131 |
| <i>Glipr2</i>        | chr4:43957400-43979118    | 37.0009  | 34.6502 | -0.0947 | 0.430703 |
| <i>Nol8</i>          | chr13:49653349-49679015   | 29.5568  | 28.1852 | -0.0686 | 0.328667 |
| <i>Acpt</i>          | chr7:44252147-44257378    | 3.8100   | 3.3521  | -0.1848 | 0.321201 |



|                      |                           |          |         |         |          |
|----------------------|---------------------------|----------|---------|---------|----------|
| <i>Gm16536</i>       | chr9:45856768-45858357    | 5.2166   | 6.0162  | 0.2057  | 0.203006 |
| <i>Ghitm</i>         | chr14:37120443-37135322   | 43.9991  | 41.8014 | -0.0739 | 0.346263 |
| <i>Hs6st1</i>        | chr1:36068399-36106446    | 8.9323   | 8.3300  | -0.1007 | 0.409406 |
| <i>Ankhd1</i>        | chr18:36559986-36665917   | 37.2977  | 36.1941 | -0.0433 | 0.346007 |
| <i>Ccnd3</i>         | chr17:47505050-47599691   | 26.8506  | 25.9717 | -0.0480 | 0.337639 |
| <i>Fam212a</i>       | chr9:107984226-107985879  | 3.1194   | 3.9773  | 0.3505  | 0.384803 |
| <i>Msmg</i>          | chr4:43583215-43584494    | 12.6296  | 14.3500 | 0.1842  | 0.143581 |
| <i>Suox</i>          | chr10:128669886-128673918 | 20.8473  | 19.9128 | -0.0662 | 0.137056 |
| <i>G730046D07Rik</i> | chr7:126565918-126566380  | 13.8881  | 16.0105 | 0.2052  | 0.104980 |
| <i>Rnf41</i>         | chr10:128411615-128441438 | 14.3071  | 13.7060 | -0.0619 | 0.272118 |
| <i>Ubt1</i>          | chr19:41981762-42034641   | 5.0748   | 4.5153  | -0.1685 | 0.254665 |
| <i>Usp8</i>          | chr2:126707327-126759297  | 26.1284  | 27.9160 | 0.0955  | 0.117236 |
| <i>Szt2</i>          | chr4:118362742-118409273  | 8.3434   | 9.3585  | 0.1656  | 0.395342 |
| <i>MIh1</i>          | chr9:111228227-111271608  | 12.6438  | 11.9624 | -0.0799 | 0.371859 |
| <i>4930500M09Rik</i> | chr1:170214859-170215556  | 8.2255   | 7.1054  | -0.2112 | 0.357788 |
| <i>Rptor</i>         | chr11:119602904-119899576 | 3.9787   | 4.5240  | 0.1853  | 0.416299 |
| <i>Gsdmd</i>         | chr15:75862338-75867404   | 60.6019  | 57.5814 | -0.0738 | 0.407439 |
| <i>Ntmt1</i>         | chr2:30807825-30823033    | 5.7478   | 5.3059  | -0.1154 | 0.251924 |
| <i>Mocs3</i>         | chr2:168230621-168232302  | 9.4337   | 8.6747  | -0.1210 | 0.306567 |
| <i>Serinc1</i>       | chr10:57515773-57532530   | 31.9300  | 34.1659 | 0.0976  | 0.184167 |
| <i>Sf3a2</i>         | chr10:80798197-80804924   | 7.0562   | 8.0261  | 0.1858  | 0.332883 |
| <i>Pola1</i>         | chrX:93304766-93632155    | 3.4574   | 3.7705  | 0.1251  | 0.142723 |
| <i>Gm14027</i>       | chr2:129016951-129021756  | 8.0553   | 9.6896  | 0.2665  | 0.311508 |
| <i>Atrn</i>          | chr2:130906494-131030333  | 8.3912   | 8.0464  | -0.0605 | 0.359451 |
| <i>Gm15344</i>       | chr10:86692118-86693095   | 40.3427  | 37.4213 | -0.1084 | 0.211893 |
| <i>Wnk1</i>          | chr6:119923968-120038672  | 20.1131  | 22.1366 | 0.1383  | 0.370113 |
| <i>Birc3</i>         | chr9:7848698-7873186      | 27.7284  | 29.8383 | 0.1058  | 0.234841 |
| <i>Ubxn1</i>         | chr19:8871558-8875663     | 106.3473 | 98.6609 | -0.1082 | 0.438483 |
| <i>Ankrd6</i>        | chr4:32804034-32950841    | 0.7943   | 0.9646  | 0.2803  | 0.323472 |
| <i>Triap1</i>        | chr5:115341224-115343569  | 11.9968  | 13.4002 | 0.1596  | 0.118541 |
| <i>Tprkb</i>         | chr6:85915737-85930284    | 10.8084  | 9.9559  | -0.1185 | 0.396647 |
| <i>C030039L03Rik</i> | chr7:27689339-27706484    | 0.9308   | 0.8048  | -0.2098 | 0.184771 |
| <i>Zfp619</i>        | chr7:39517765-39540420    | 2.0346   | 2.2952  | 0.1738  | 0.227118 |
| <i>Pdcl3</i>         | chr1:38987813-38997236    | 19.6451  | 18.1453 | -0.1146 | 0.371833 |
| <i>A1597479</i>      | chr1:43098709-43115947    | 12.4593  | 11.7543 | -0.0840 | 0.302331 |
| <i>Dnajb4</i>        | chr3:152178510-152210279  | 5.3178   | 4.9638  | -0.0994 | 0.251904 |
| <i>3010026O09Rik</i> | chr11:50174443-50200115   | 3.4086   | 4.0330  | 0.2427  | 0.278110 |
| <i>Fam179b</i>       | chr12:64965741-65022573   | 18.6627  | 17.8037 | -0.0680 | 0.437906 |
| <i>Gm21967</i>       | chr13:119606649-119610458 | 3.0175   | 2.6341  | -0.1960 | 0.135684 |
| <i>Orc5</i>          | chr5:22486484-22550429    | 17.9436  | 19.2969 | 0.1049  | 0.100939 |
| <i>Xrcc2</i>         | chr5:25689811-25705825    | 1.4570   | 1.3150  | -0.1480 | 0.024632 |
| <i>Brf2</i>          | chr8:27123831-27128632    | 7.5275   | 6.8583  | -0.1343 | 0.180428 |
| <i>Gm5617</i>        | chr9:48495344-48495964    | 11.2447  | 9.7097  | -0.2118 | 0.373448 |
| <i>Nck1</i>          | chr9:100492292-100546053  | 12.1979  | 13.1149 | 0.1046  | 0.112761 |
| <i>Dcaf6</i>         | chr1:165329510-165460465  | 20.9879  | 20.1590 | -0.0581 | 0.161900 |
| <i>Mpc2</i>          | chr1:165461036-165481214  | 6.8754   | 6.3336  | -0.1184 | 0.351008 |
| <i>A330023F24Rik</i> | chr1:194976374-195037908  | 1.4428   | 1.6757  | 0.2159  | 0.369863 |
| <i>Trub2</i>         | chr2:29761223-29788502    | 6.9696   | 6.5494  | -0.0897 | 0.385051 |
| <i>Nup188</i>        | chr2:30286396-30344266    | 12.1039  | 13.1257 | 0.1169  | 0.239139 |
| <i>Sec62</i>         | chr3:30792875-30821263    | 33.8277  | 36.4404 | 0.1073  | 0.212083 |
| <i>Lrba</i>          | chr3:86224689-86782693    | 29.0448  | 31.3896 | 0.1120  | 0.276957 |
| <i>Masp2</i>         | chr4:148602553-148615499  | 19.3743  | 20.9020 | 0.1095  | 0.191369 |
| <i>Dr1</i>           | chr5:108268896-108280526  | 26.3259  | 28.4804 | 0.1135  | 0.200131 |
| <i>Slc38a10</i>      | chr11:120103959-120151346 | 20.8266  | 19.9023 | -0.0655 | 0.439703 |
| <i>Arhgap19</i>      | chr19:41766587-41802084   | 1.4912   | 1.7458  | 0.2274  | 0.319868 |
| <i>Far1</i>          | chr7:113513833-113571511  | 10.8481  | 11.7886 | 0.1199  | 0.256638 |
| <i>Ppp2r1b</i>       | chr9:50845300-50894229    | 14.6824  | 15.7679 | 0.1029  | 0.138264 |
| <i>Gm14337</i>       | chr2:173984481-173984691  | 20.7209  | 25.5578 | 0.3027  | 0.352599 |
| <i>Dnajc13</i>       | chr9:104151596-104262930  | 22.5091  | 24.2063 | 0.1049  | 0.229533 |
| <i>Antxr2</i>        | chr5:97882782-98030733    | 11.0665  | 11.9124 | 0.1063  | 0.166186 |
| <i>Mkl1</i>          | chr15:81012280-81190757   | 15.1757  | 16.8075 | 0.1473  | 0.365003 |
| <i>Gng12</i>         | chr6:66896396-67021350    | 1.8508   | 2.1540  | 0.2189  | 0.311826 |
| <i>Atp1b1</i>        | chr1:164437266-164458355  | 33.8912  | 32.3353 | -0.0678 | 0.364202 |
| <i>Aldh18a1</i>      | chr19:40550256-40588463   | 22.0124  | 21.1317 | -0.0589 | 0.329789 |
| <i>Senp3</i>         | chr11:69673114-69682084   | 23.6352  | 22.6268 | -0.0629 | 0.334775 |
| <i>Cmpk2</i>         | chr12:26469203-26479835   | 7.6635   | 9.7302  | 0.3445  | 0.307195 |
| <i>NA</i>            | chr12:84417193-84418577   | 12.0748  | 13.4382 | 0.1543  | 0.190365 |
| <i>Rnf113a2</i>      | chr12:84417195-84418578   | 12.0748  | 13.4382 | 0.1543  | 0.190365 |
| <i>Rcor1</i>         | chr12:111039350-111115901 | 16.3489  | 17.5370 | 0.1012  | 0.161079 |
| <i>Zfp775</i>        | chr6:48613179-48623227    | 2.8175   | 3.1995  | 0.1834  | 0.227109 |
| <i>Iqgap1</i>        | chr7:80711582-80803331    | 85.6141  | 91.3951 | 0.0943  | 0.186559 |

|                      |                           |          |          |         |          |
|----------------------|---------------------------|----------|----------|---------|----------|
| <i>Nod2</i>          | chr8:88647314-88688474    | 0.9780   | 1.1662   | 0.2538  | 0.261324 |
| <i>Birc2</i>         | chr9:7818235-7835255      | 46.3746  | 49.9841  | 0.1081  | 0.175917 |
| <i>Rragb</i>         | chrX:153139980-153171943  | 4.7228   | 5.3186   | 0.1714  | 0.142697 |
| <i>Zbed4</i>         | chr15:88751659-88784516   | 1.7770   | 1.5953   | -0.1556 | 0.311247 |
| <i>Lpar6</i>         | chr14:73237890-73240358   | 36.9230  | 40.2451  | 0.1243  | 0.251569 |
| <i>Tiam2</i>         | chr17:3326572-3519397     | 0.6869   | 0.8154   | 0.2475  | 0.189004 |
| <i>Zfp40</i>         | chr17:23173868-23193252   | 4.7064   | 4.4016   | -0.0966 | 0.218195 |
| <i>Eci1</i>          | chr17:24426682-24439316   | 15.5266  | 14.2447  | -0.1243 | 0.318181 |
| <i>Srsf3</i>         | chr17:29032672-29043366   | 64.5185  | 62.6042  | -0.0435 | 0.298915 |
| <i>AY036118</i>      | chr17:39848102-39848827   | 523.7256 | 478.0913 | -0.1315 | 0.520963 |
| <i>Nudt8</i>         | chr19:4000579-4005816     | 3.9809   | 3.7016   | -0.1049 | 0.172780 |
| <i>Stambpl1</i>      | chr19:34192228-34240333   | 16.4993  | 15.7054  | -0.0711 | 0.363845 |
| <i>Rbm45</i>         | chr2:76369983-76383768    | 46.4203  | 44.5763  | -0.0585 | 0.243165 |
| <i>Dclk2</i>         | chr3:86786149-86920884    | 1.6362   | 1.8712   | 0.1935  | 0.030097 |
| <i>Gon4l</i>         | chr3:88835230-88910103    | 14.6280  | 14.0355  | -0.0596 | 0.386180 |
| <i>Tmem104</i>       | chr11:115187486-115247023 | 1.8191   | 2.0778   | 0.1918  | 0.138757 |
| <i>Tbce</i>          | chr13:13997948-14039638   | 21.7692  | 20.8108  | -0.0650 | 0.337886 |
| <i>4930480K23Rik</i> | chr14:69732783-69767113   | 2.1362   | 2.4287   | 0.1852  | 0.108040 |
| <i>Dtx4</i>          | chr19:12466340-12501996   | 1.9547   | 2.2947   | 0.2313  | 0.321817 |
| <i>Ankrd39</i>       | chr1:36538172-36547201    | 9.5958   | 8.7834   | -0.1276 | 0.343926 |
| <i>Uck1</i>          | chr2:32255001-32260159    | 10.3672  | 9.7196   | -0.0930 | 0.346011 |
| <i>Ndufb6</i>        | chr4:40270590-40279421    | 22.4721  | 25.8906  | 0.2043  | 0.351800 |
| <i>Slc1a5</i>        | chr7:16781345-16798274    | 51.3240  | 49.0196  | -0.0663 | 0.440322 |
| <i>Gm16861</i>       | chr16:4935047-4939585     | 3.5347   | 4.1019   | 0.2147  | 0.112026 |
| <i>Aurka</i>         | chr2:172356189-172370535  | 2.1612   | 2.5586   | 0.2435  | 0.308714 |
| <i>Milr1</i>         | chr11:106751225-106768794 | 5.7206   | 6.3591   | 0.1527  | 0.139384 |
| <i>Foxn3</i>         | chr12:99194979-99450111   | 20.7537  | 22.3404  | 0.1063  | 0.184052 |
| <i>Cand2</i>         | chr6:115774537-115804893  | 3.5225   | 3.9277   | 0.1571  | 0.229037 |
| <i>Tacc2</i>         | chr7:130577483-130764784  | 0.5289   | 0.6205   | 0.2306  | 0.151423 |
| <i>Ept1</i>          | chr5:30232580-30272012    | 5.0320   | 4.7603   | -0.0801 | 0.384097 |
| <i>Wbscr22</i>       | chr5:135052956-135064959  | 12.7713  | 12.1003  | -0.0779 | 0.305741 |
| <i>Mtmt14</i>        | chr6:113237842-113281387  | 15.6496  | 14.9118  | -0.0697 | 0.274582 |
| <i>Tatdn3</i>        | chr1:191045825-191062932  | 5.1087   | 4.6324   | -0.1412 | 0.336679 |
| <i>Mast2</i>         | chr4:116306761-116464183  | 3.4906   | 3.9628   | 0.1831  | 0.355624 |
| <i>Malsu1</i>        | chr6:49073794-49086751    | 7.7454   | 8.4531   | 0.1261  | 0.100555 |
| <i>4933434E20Rik</i> | chr3:90051635-90063341    | 20.1195  | 19.2847  | -0.0611 | 0.269560 |
| <i>Gm10143</i>       | chr19:10198367-10202384   | 9.0274   | 8.4443   | -0.0963 | 0.311370 |
| <i>Vdac3</i>         | chr8:22577074-22593813    | 10.4807  | 9.6629   | -0.1172 | 0.204777 |
| <i>Pgap3</i>         | chr11:98388676-98400490   | 2.3516   | 2.0856   | -0.1732 | 0.347795 |
| <i>Polr3e</i>        | chr7:120917743-120947432  | 20.0012  | 19.2348  | -0.0564 | 0.308193 |
| <i>Cox11</i>         | chr11:90638172-90644931   | 6.4813   | 7.3816   | 0.1877  | 0.195316 |
| <i>Gpr183</i>        | chr14:121952330-121965193 | 64.2366  | 68.4146  | 0.0909  | 0.132694 |
| <i>Tex261</i>        | chr6:83768880-83775812    | 21.7977  | 20.9844  | -0.0549 | 0.292324 |
| <i>Xylt1</i>         | chr7:117380978-117667751  | 3.2472   | 3.8257   | 0.2365  | 0.406556 |
| <i>Reep5</i>         | chr18:34344888-34373415   | 11.3759  | 12.4369  | 0.1286  | 0.192823 |
| <i>Lrp8</i>          | chr4:107802260-107876840  | 1.3067   | 1.1919   | -0.1327 | 0.342809 |
| <i>P2rx7</i>         | chr5:122643910-122691432  | 5.7293   | 7.2558   | 0.3408  | 0.338208 |
| <i>Prosc</i>         | chr8:27042554-27056131    | 12.3947  | 11.8538  | -0.0644 | 0.220103 |
| <i>Shprh</i>         | chr10:11149426-11217595   | 12.2589  | 13.0753  | 0.0930  | 0.143497 |
| <i>Tspan31</i>       | chr10:127067316-127070261 | 12.0291  | 13.4232  | 0.1582  | 0.276865 |
| <i>Iars</i>          | chr13:49682099-49734267   | 14.0862  | 15.1829  | 0.1082  | 0.204082 |
| <i>Bst2</i>          | chr8:71534263-71537437    | 40.0356  | 45.2122  | 0.1754  | 0.360669 |
| <i>A530083I20Rik</i> | chr9:122885079-122903184  | 1.6962   | 2.0088   | 0.2440  | 0.265499 |
| <i>Tmem164</i>       | chrX:142681405-142843494  | 20.2900  | 19.4259  | -0.0628 | 0.361635 |
| <i>Ccdc78</i>        | chr17:25786579-25790513   | 3.8564   | 4.4216   | 0.1973  | 0.076580 |
| <i>Abcc5</i>         | chr16:20331302-20426394   | 8.0001   | 8.7045   | 0.1217  | 0.276756 |
| <i>Sp110</i>         | chr1:85576898-85598817    | 21.1863  | 22.6101  | 0.0938  | 0.135668 |
| <i>Tanc1</i>         | chr2:59612041-59846149    | 6.5034   | 6.0678   | -0.1000 | 0.462112 |
| <i>Cep250</i>        | chr2:155956457-155998900  | 10.9838  | 11.9193  | 0.1179  | 0.291390 |
| <i>Gm11457</i>       | chr2:164754241-164769666  | 10.1345  | 11.5355  | 0.1868  | 0.084349 |
| <i>Gm16573</i>       | chr14:56607260-56620513   | 11.7089  | 13.1772  | 0.1704  | 0.278943 |
| <i>Kcnmb4os2</i>     | chr10:116473162-116475319 | 2.2680   | 1.8887   | -0.2640 | 0.400958 |
| <i>Tbx21</i>         | chr11:97098070-97115331   | 2.1422   | 3.2628   | 0.6070  | 0.311488 |
| <i>Traj7</i>         | chr14:54211469-54211528   | 90.0896  | 107.1307 | 0.2499  | 0.295289 |
| <i>Rab37</i>         | chr11:115091430-115162236 | 15.1296  | 16.2777  | 0.1055  | 0.168131 |
| <i>6720427I07Rik</i> | chr13:48535522-48537822   | 37.5361  | 34.9702  | -0.1022 | 0.437914 |
| <i>Rps10-ps1</i>     | chr3:95622277-95622775    | 26.9868  | 23.4596  | -0.2021 | 0.404241 |
| <i>Nop16</i>         | chr13:54584184-54590090   | 8.8365   | 8.2486   | -0.0993 | 0.057449 |
| <i>Rasa2</i>         | chr9:96539299-96631617    | 16.4895  | 17.9143  | 0.1196  | 0.246015 |
| <i>Cox14</i>         | chr15:99725617-99728136   | 31.8997  | 29.1987  | -0.1276 | 0.384701 |
| <i>Rab3ip</i>        | chr10:116905783-116950380 | 32.7401  | 31.1149  | -0.0735 | 0.375712 |

|                      |                           |          |          |         |          |
|----------------------|---------------------------|----------|----------|---------|----------|
| <i>Z310010J17Rik</i> | chr7:90124857-90129474    | 8.9550   | 10.6255  | 0.2468  | 0.222449 |
| <i>Usp11</i>         | chrX:20703905-20720539    | 3.2363   | 3.5972   | 0.1525  | 0.176272 |
| <i>Clk4</i>          | chr11:51261729-51281766   | 44.9903  | 43.0574  | -0.0634 | 0.406709 |
| <i>Gtf2a1</i>        | chr12:91555915-91590487   | 8.2305   | 8.9836   | 0.1263  | 0.216893 |
| <i>Gins3</i>         | chr8:95633558-95645059    | 4.9030   | 4.4165   | -0.1508 | 0.297679 |
| <i>Hgh1</i>          | chr15:76368897-76371403   | 7.9408   | 7.2462   | -0.1321 | 0.400157 |
| <i>Slc52a3</i>       | chr2:151996510-152009258  | 1.6894   | 1.3560   | -0.3171 | 0.436582 |
| <i>Zyg11b</i>        | chr4:108229723-108301096  | 31.0041  | 29.6694  | -0.0635 | 0.376553 |
| <i>Fbxw9</i>         | chr8:85060054-85067124    | 1.3847   | 1.1991   | -0.2077 | 0.300779 |
| <i>Eif3g</i>         | chr9:20894351-20898600    | 93.3206  | 88.6149  | -0.0746 | 0.358369 |
| <i>Itgb3bp</i>       | chr4:99765401-99929813    | 4.6657   | 4.3520   | -0.1004 | 0.259818 |
| <i>Ints4</i>         | chr7:97480955-97541397    | 19.4418  | 18.6913  | -0.0568 | 0.116455 |
| <i>Ndfip1</i>        | chr18:38418974-38464399   | 111.5951 | 120.5544 | 0.1114  | 0.252005 |
| <i>Lrrcc1</i>        | chr3:14533787-14572658    | 8.3480   | 8.9869   | 0.1064  | 0.187558 |
| <i>Smc2</i>          | chr4:52439242-52488260    | 10.0326  | 11.1019  | 0.1461  | 0.330425 |
| <i>Arl14ep</i>       | chr2:106962526-106974424  | 9.8795   | 9.3498   | -0.0795 | 0.337127 |
| <i>Letmd1</i>        | chr15:100469033-100479252 | 23.3126  | 22.3870  | -0.0585 | 0.175913 |
| <i>Ino80dos</i>      | chr1:63114470-63158290    | 6.8303   | 7.6940   | 0.1718  | 0.169715 |
| <i>H2-T10</i>        | chr17:36115875-36121465   | 15.1202  | 16.2858  | 0.1071  | 0.130014 |
| <i>Ccdc14</i>        | chr16:34690615-34725194   | 2.1942   | 2.4833   | 0.1786  | 0.130526 |
| <i>Nip7</i>          | chr8:107056876-107060926  | 15.8477  | 14.8680  | -0.0921 | 0.362683 |
| <i>Lyz2</i>          | chr10:117277333-117282274 | 3.8041   | 4.7209   | 0.3115  | 0.368468 |
| <i>Ubfd1</i>         | chr7:122067174-122082194  | 7.2530   | 6.8949   | -0.0731 | 0.378037 |
| <i>Phf7</i>          | chr14:31237695-31251218   | 9.2472   | 8.5892   | -0.1065 | 0.255642 |
| <i>Gemin5</i>        | chr11:58120001-58168539   | 11.0600  | 10.6552  | -0.0538 | 0.241243 |
| <i>Gm20033</i>       | chr5:64708206-64804117    | 5.3550   | 4.8591   | -0.1402 | 0.322800 |
| <i>Inpp5f</i>        | chr7:128611327-128696425  | 12.3056  | 13.1561  | 0.0964  | 0.187711 |
| <i>Dazap2</i>        | chr15:100615627-100620731 | 71.9522  | 79.1282  | 0.1372  | 0.308184 |
| <i>Xdh</i>           | chr17:73883907-73950182   | 8.7537   | 9.9813   | 0.1893  | 0.416774 |
| <i>Gm20680</i>       | chr15:100586095-100592037 | 5.3737   | 6.4896   | 0.2722  | 0.268659 |
| <i>Elovl7</i>        | chr13:108214403-108287105 | 1.2375   | 1.0873   | -0.1866 | 0.308286 |
| <i>Ubl3</i>          | chr5:148504630-148552789  | 36.8290  | 34.4161  | -0.0978 | 0.427711 |
| <i>Cpeb4</i>         | chr11:31872210-31935634   | 10.2043  | 10.9588  | 0.1029  | 0.135949 |
| <i>Hint3</i>         | chr10:30608140-30618479   | 13.5332  | 15.0588  | 0.1541  | 0.178885 |
| <i>Tmem263</i>       | chr10:85102626-85117747   | 6.3961   | 7.0836   | 0.1473  | 0.266375 |
| <i>Rhbdd3</i>        | chr11:5098925-5106093     | 2.0458   | 1.7766   | -0.2035 | 0.316833 |
| <i>Ahr</i>           | chr12:35497973-35535038   | 1.0084   | 1.2243   | 0.2799  | 0.398858 |
| <i>Habp4</i>         | chr13:64161865-64186536   | 8.6653   | 8.0592   | -0.1046 | 0.315102 |
| <i>Commd8</i>        | chr5:72156999-72168183    | 34.2306  | 31.9874  | -0.0978 | 0.440965 |
| <i>Gbp4</i>          | chr5:105115766-105139586  | 81.2150  | 88.0493  | 0.1166  | 0.290953 |
| <i>Snrpa</i>         | chr7:27187004-27196271    | 13.0919  | 12.1366  | -0.1093 | 0.392215 |
| <i>Idh3a</i>         | chr9:54586510-54604661    | 16.5420  | 18.2557  | 0.1422  | 0.301371 |
| <i>Gm20661</i>       | chr9:107983057-107995007  | 5.3676   | 4.8131   | -0.1573 | 0.420845 |
| <i>Rnf19a</i>        | chr15:36239933-36283147   | 45.0627  | 48.8713  | 0.1171  | 0.314401 |
| <i>Glis2</i>         | chr16:4594712-4624924     | 0.8541   | 1.0277   | 0.2670  | 0.247701 |
| <i>Fam86</i>         | chr16:5244151-5255983     | 15.1392  | 14.2295  | -0.0894 | 0.409891 |
| <i>Gm15725</i>       | chr16:37882541-37883631   | 29.3163  | 32.0176  | 0.1272  | 0.164147 |
| <i>Runx1</i>         | chr16:92601466-92826066   | 9.3298   | 10.3462  | 0.1492  | 0.351049 |
| <i>Swi5</i>          | chr2:32278815-32288075    | 25.5687  | 23.3914  | -0.1284 | 0.444325 |
| <i>Fam105a</i>       | chr15:27655070-27681542   | 71.5480  | 68.8131  | -0.0562 | 0.403013 |
| <i>Dnajc18</i>       | chr18:35671102-35703144   | 6.8143   | 6.3499   | -0.1018 | 0.402113 |
| <i>Trbj2-5</i>       | chr6:41543452-41543501    | 207.3265 | 185.3825 | -0.1614 | 0.403805 |
| <i>Srebfp2</i>       | chr15:82147265-82205376   | 27.6526  | 25.9779  | -0.0901 | 0.485775 |
| <i>Tubb4a</i>        | chr17:57080065-57087782   | 2.8598   | 2.5427   | -0.1695 | 0.240118 |
| <i>Cox5b</i>         | chr1:36691486-36693385    | 57.7524  | 52.8962  | -0.1267 | 0.435033 |
| <i>Osgpl1</i>        | chr1:53313623-53326343    | 3.0627   | 3.3652   | 0.1359  | 0.096156 |
| <i>Ptma</i>          | chr1:86526735-86530698    | 114.4522 | 102.9529 | -0.1528 | 0.467163 |
| <i>Ubac1</i>         | chr2:25998542-26021747    | 15.7026  | 14.9809  | -0.0679 | 0.178119 |
| <i>Gmps</i>          | chr3:63976105-64022579    | 8.7349   | 9.4025   | 0.1063  | 0.214157 |
| <i>Pacrgl</i>        | chr5:48372391-48388756    | 3.5911   | 4.1544   | 0.2102  | 0.065200 |
| <i>Tmem110</i>       | chr14:30825589-30876986   | 6.0927   | 5.7473   | -0.0842 | 0.226286 |
| <i>Ngdn</i>          | chr14:55015453-55024135   | 54.2716  | 51.0640  | -0.0879 | 0.401997 |
| <i>lft140</i>        | chr17:25016090-25099495   | 5.7841   | 6.2374   | 0.1089  | 0.128762 |
| <i>Ly75</i>          | chr2:60292102-60383303    | 29.7077  | 28.3716  | -0.0664 | 0.466560 |
| <i>Zswim3</i>        | chr2:164805097-164822130  | 3.2562   | 2.9241   | -0.1552 | 0.309761 |
| <i>Smug1</i>         | chr15:103153306-103158002 | 7.6863   | 7.2452   | -0.0853 | 0.221428 |
| <i>Cyp20a1</i>       | chr1:60343322-60388060    | 6.7291   | 6.0959   | -0.1426 | 0.386063 |
| <i>Gm17029</i>       | chr4:148960296-148984671  | 2.4491   | 2.2743   | -0.1068 | 0.205820 |
| <i>Pex7</i>          | chr10:19859928-19907689   | 7.3763   | 6.8237   | -0.1123 | 0.277381 |
| <i>Cdk10</i>         | chr8:123224840-123232250  | 15.0760  | 14.0864  | -0.0979 | 0.360452 |
| <i>Exosc4</i>        | chr15:76327396-76330677   | 14.8255  | 13.8755  | -0.0955 | 0.299780 |

|                      |                           |          |          |         |          |
|----------------------|---------------------------|----------|----------|---------|----------|
| <i>Dock9</i>         | chr14:121542038-121797734 | 8.5639   | 8.2419   | -0.0553 | 0.237978 |
| <i>Tlhc1</i>         | chr8:119760586-119778416  | 5.4823   | 5.0385   | -0.1218 | 0.298744 |
| <i>Snmp25</i>        | chr11:32205414-32208984   | 6.5732   | 5.8705   | -0.1631 | 0.127195 |
| <i>Pak4</i>          | chr7:28558818-28598185    | 2.5716   | 2.3038   | -0.1586 | 0.384875 |
| <i>Cwc25</i>         | chr11:97745480-97766556   | 7.1325   | 7.7054   | 0.1115  | 0.108975 |
| <i>Ccp110</i>        | chr7:118712551-118737024  | 2.3935   | 2.6291   | 0.1354  | 0.181282 |
| <i>Ndst2</i>         | chr14:20723738-20730327   | 10.1859  | 11.1438  | 0.1297  | 0.251244 |
| <i>8430429K09Rik</i> | chr11:3452364-3479831     | 3.1507   | 2.8244   | -0.1577 | 0.300396 |
| <i>Fmn1</i>          | chr11:103171106-103198901 | 34.7106  | 38.2209  | 0.1390  | 0.379383 |
| <i>Gm17529</i>       | chr12:58953094-58968011   | 2.2551   | 2.0062   | -0.1687 | 0.287217 |
| <i>Rdh11</i>         | chr12:79174336-79192293   | 12.1341  | 11.4259  | -0.0868 | 0.343650 |
| <i>Cep128</i>        | chr12:90998491-91384409   | 1.1240   | 1.2645   | 0.1700  | 0.254035 |
| <i>Gm17039</i>       | chr13:67360670-67365679   | 5.3851   | 5.0329   | -0.0976 | 0.339728 |
| <i>Slc26a1</i>       | chr5:108669877-108675569  | 2.4973   | 2.8253   | 0.1780  | 0.212208 |
| <i>Tesc</i>          | chr5:118027742-118061878  | 24.0614  | 21.9196  | -0.1345 | 0.454099 |
| <i>Zfp316</i>        | chr5:143249696-143270022  | 0.9683   | 1.1276   | 0.2197  | 0.259833 |
| <i>Tcaim</i>         | chr9:122805538-122836334  | 9.9022   | 9.3819   | -0.0779 | 0.191258 |
| <i>Rab11fip3</i>     | chr17:25989035-26069409   | 3.2244   | 2.9965   | -0.1058 | 0.397412 |
| <i>Scarna6</i>       | chr1:87784555-87784820    | 121.6975 | 107.9167 | -0.1734 | 0.460734 |
| <i>Hjurp</i>         | chr1:88262470-88277633    | 36.6037  | 35.4731  | -0.0453 | 0.403465 |
| <i>Oser1</i>         | chr2:163405821-163424697  | 3.0475   | 2.7502   | -0.1481 | 0.222501 |
| <i>Sap30bp</i>       | chr11:115933281-115966725 | 18.7616  | 17.8187  | -0.0744 | 0.379063 |
| <i>Glt8d1</i>        | chr14:31001392-31012441   | 4.3355   | 4.8254   | 0.1545  | 0.090119 |
| <i>Sh2d1a</i>        | chrX:42502452-42523697    | 14.9061  | 16.3367  | 0.1322  | 0.287502 |
| <i>Dleu2</i>         | chr14:61602838-61682373   | 6.3888   | 7.2462   | 0.1817  | 0.421545 |
| <i>Fas</i>           | chr19:34290658-34327770   | 16.8271  | 18.1970  | 0.1129  | 0.094963 |
| <i>Erap1</i>         | chr13:74639871-74691875   | 67.2447  | 65.0839  | -0.0471 | 0.385479 |
| <i>Wscd2</i>         | chr5:113490332-113589725  | 1.1844   | 1.0743   | -0.1408 | 0.414789 |
| <i>Senp1</i>         | chr15:98038743-98093744   | 8.5293   | 9.1107   | 0.0951  | 0.153128 |
| <i>Mx1</i>           | chr16:97447034-97462907   | 3.5201   | 6.1501   | 0.8050  | 0.283742 |
| <i>Gpc1</i>          | chr1:92831644-92860198    | 3.1617   | 2.8461   | -0.1517 | 0.406805 |
| <i>Slc26a11</i>      | chr11:119355556-119381079 | 4.5044   | 5.0259   | 0.1580  | 0.280838 |
| <i>Laptm4a</i>       | chr12:8921663-8938742     | 42.9608  | 45.9035  | 0.0956  | 0.078970 |
| <i>Trim30d</i>       | chr7:104470013-104507849  | 7.9686   | 10.0066  | 0.3286  | 0.324862 |
| <i>Amfr</i>          | chr8:93971587-94012663    | 45.4614  | 43.7402  | -0.0557 | 0.425760 |
| <i>Prmt6</i>         | chr3:110246111-110250998  | 11.4670  | 10.8692  | -0.0772 | 0.311575 |
| <i>Naa25</i>         | chr5:121397935-121444378  | 12.1918  | 11.7466  | -0.0537 | 0.311496 |
| <i>Setd1b</i>        | chr5:123142192-123167435  | 2.0725   | 2.3315   | 0.1699  | 0.337224 |
| <i>Tnpo1</i>         | chr13:98839018-98926384   | 33.8831  | 32.8087  | -0.0465 | 0.305119 |
| <i>Bcl3</i>          | chr7:19808461-19822770    | 12.2480  | 15.7897  | 0.3664  | 0.314251 |
| <i>Dph5</i>          | chr3:115888172-115929332  | 30.7431  | 29.1786  | -0.0754 | 0.442470 |
| <i>Elk3</i>          | chr10:93247413-93311135   | 13.0270  | 13.9766  | 0.1015  | 0.153471 |
| <i>Tom11l</i>        | chr11:90643464-90688366   | 2.2875   | 2.5173   | 0.1381  | 0.153019 |
| <i>Coro1c</i>        | chr5:113842435-113908758  | 10.7975  | 10.3108  | -0.0665 | 0.392056 |
| <i>E130317F20Rik</i> | chr10:79851380-79854956   | 3.6414   | 3.3349   | -0.1268 | 0.269060 |
| <i>BC043934</i>      | chr9:96435783-96437434    | 32.4538  | 30.9358  | -0.0691 | 0.299461 |
| <i>Rev1</i>          | chr1:38052786-38129662    | 11.7592  | 12.6212  | 0.1021  | 0.116851 |
| <i>Ilf3</i>          | chr9:21368018-21405361    | 26.5151  | 25.7787  | -0.0406 | 0.092600 |
| <i>Fez2</i>          | chr17:78377884-78418131   | 14.7288  | 13.7299  | -0.1013 | 0.384996 |
| <i>Gm26635</i>       | chr16:17254959-17260326   | 1.6382   | 1.4376   | -0.1884 | 0.225633 |
| <i>Amy1</i>          | chr3:113555709-113606699  | 5.4563   | 4.9542   | -0.1393 | 0.386300 |
| <i>9030624J02Rik</i> | chr7:118740225-118842966  | 11.7349  | 11.3567  | -0.0473 | 0.232337 |
| <i>Ppp2r5b</i>       | chr19:6227764-6235872     | 7.7252   | 7.2703   | -0.0876 | 0.194411 |
| <i>D630008O14Rik</i> | chr1:106541942-106575045  | 25.2099  | 23.5944  | -0.0955 | 0.469322 |
| <i>Zfp106</i>        | chr2:120506819-120563843  | 16.5132  | 17.7207  | 0.1018  | 0.233307 |
| <i>Fbxo7</i>         | chr10:86021971-86051873   | 5.4507   | 5.9199   | 0.1191  | 0.181372 |
| <i>Zfyve16</i>       | chr13:92487107-92530868   | 8.0723   | 8.8085   | 0.1259  | 0.303857 |
| <i>Sepsecs</i>       | chr5:52640086-52669729    | 6.5656   | 6.1145   | -0.1027 | 0.450369 |
| <i>Atp8a1</i>        | chr5:67618139-67847432    | 11.2000  | 12.1464  | 0.1170  | 0.304794 |
| <i>Sec11a</i>        | chr7:80904888-80947780    | 22.9820  | 22.1372  | -0.0540 | 0.275184 |
| <i>Trmt1</i>         | chr8:84686306-84699808    | 14.9293  | 14.3848  | -0.0536 | 0.322270 |
| <i>Qtrtd1</i>        | chr16:43861406-43926809   | 8.1771   | 7.7721   | -0.0733 | 0.267924 |
| <i>Mrpl37</i>        | chr4:107055873-107066868  | 8.8536   | 8.3937   | -0.0770 | 0.346765 |
| <i>Cdc20</i>         | chr4:118432900-118437352  | 3.4766   | 4.0179   | 0.2088  | 0.275293 |
| <i>Snip1</i>         | chr4:125066671-125074042  | 25.5136  | 24.3378  | -0.0681 | 0.317931 |
| <i>1700020I14Rik</i> | chr2:119594296-119607502  | 35.9604  | 38.5101  | 0.0988  | 0.214149 |
| <i>Pced1b</i>        | chr15:97247106-97385689   | 32.5699  | 36.3307  | 0.1576  | 0.369713 |
| <i>Setx</i>          | chr2:29124180-29182471    | 123.8993 | 119.6523 | -0.0503 | 0.410388 |
| <i>Gm17084</i>       | chr13:34033062-34037147   | 9.1128   | 8.4921   | -0.1018 | 0.445607 |
| <i>Smek2</i>         | chr11:29172889-29220797   | 66.8744  | 63.9643  | -0.0642 | 0.425015 |
| <i>Mir686</i>        | chr14:54616676-54616785   | 63.9222  | 57.2634  | -0.1587 | 0.137911 |

|                      |                           |          |          |         |          |
|----------------------|---------------------------|----------|----------|---------|----------|
| <i>Epas1</i>         | chr17:86753906-86833410   | 1.4911   | 1.3215   | -0.1741 | 0.346058 |
| <i>1700018M17Rik</i> | chr4:59549153-59549625    | 26.6122  | 24.3947  | -0.1255 | 0.241982 |
| <i>Fastkd1</i>       | chr2:69686814-69713516    | 3.9209   | 4.2952   | 0.1315  | 0.157511 |
| <i>1200014J11Rik</i> | chr11:73047782-73080217   | 12.3863  | 13.2172  | 0.0937  | 0.163899 |
| <i>Gm26549</i>       | chr17:32284786-32298689   | 5.8141   | 5.1591   | -0.1724 | 0.286433 |
| <i>Mtjf2</i>         | chr11:29526407-29545279   | 10.2892  | 11.1414  | 0.1148  | 0.180075 |
| <i>Trbv26</i>        | chr6:41227524-41227993    | 33.4327  | 38.3424  | 0.1977  | 0.330932 |
| <i>Tulp3</i>         | chr6:128321139-128355851  | 0.6936   | 0.8217   | 0.2444  | 0.231250 |
| <i>A330035P11Rik</i> | chr14:122103429-122106974 | 2.0000   | 2.3079   | 0.2066  | 0.234579 |
| <i>Abca3</i>         | chr17:24351949-24410201   | 11.7626  | 12.7466  | 0.1159  | 0.308085 |
| <i>Nif3l1</i>        | chr1:58445150-58481816    | 9.8212   | 9.2415   | -0.0878 | 0.334956 |
| <i>Eef1b2</i>        | chr1:63176824-63180486    | 188.3040 | 210.0007 | 0.1573  | 0.372998 |
| <i>Zfand1</i>        | chr3:10339952-10351317    | 2.9060   | 3.1760   | 0.1282  | 0.033579 |
| <i>Oma1</i>          | chr4:103313811-103371868  | 15.1211  | 14.2391  | -0.0867 | 0.291560 |
| <i>Gm12758</i>       | chr7:34234376-34240207    | 6.1002   | 5.7311   | -0.0901 | 0.313852 |
| <i>Ndufc2</i>        | chr7:97400002-97407802    | 39.3492  | 36.3378  | -0.1149 | 0.400275 |
| <i>Mks1</i>          | chr11:87853214-87863803   | 3.7855   | 4.2661   | 0.1725  | 0.285310 |
| <i>Vcp-rs</i>        | chrX:104345828-104348234  | 1.7937   | 1.5380   | -0.2219 | 0.345071 |
| <i>Aco1</i>          | chr4:40143080-40198338    | 9.8874   | 9.2917   | -0.0896 | 0.416039 |
| <i>AU041133</i>      | chr10:82138252-82152011   | 9.3596   | 10.3307  | 0.1424  | 0.118802 |
| <i>Mat2b</i>         | chr11:40679313-40695203   | 29.9278  | 28.8498  | -0.0529 | 0.332499 |
| <i>Zzef1</i>         | chr11:72796225-72927120   | 18.1105  | 19.6408  | 0.1170  | 0.330556 |
| <i>Gm17111</i>       | chr12:110664891-110665408 | 15.7161  | 18.4230  | 0.2293  | 0.322005 |
| <i>Tab1</i>          | chr15:80133153-80161701   | 16.0704  | 15.3001  | -0.0709 | 0.361703 |
| <i>2610020C07Rik</i> | chr16:11203382-11225796   | 5.4388   | 6.0549   | 0.1548  | 0.234083 |
| <i>Pcgf6</i>         | chr19:47033618-47050845   | 15.1938  | 14.2258  | -0.0950 | 0.388286 |
| <i>Sh3pxd2a</i>      | chr19:47260173-47464411   | 8.1238   | 7.5909   | -0.0979 | 0.473982 |
| <i>Zfp397</i>        | chr18:23954687-23964671   | 38.4021  | 36.3310  | -0.0800 | 0.455019 |
| <i>Afg3l2</i>        | chr18:67404766-67449166   | 15.8414  | 17.2794  | 0.1253  | 0.262138 |
| <i>Fmnl2</i>         | chr2:52857859-53134202    | 0.7292   | 0.8565   | 0.2321  | 0.158772 |
| <i>Ddx19b</i>        | chr8:111003187-111031751  | 12.5232  | 12.0318  | -0.0577 | 0.343790 |
| <i>Vta1</i>          | chr10:14654754-14705560   | 17.5552  | 16.4662  | -0.0924 | 0.375644 |
| <i>Brf1</i>          | chr12:112959861-113000621 | 41.9007  | 40.0729  | -0.0643 | 0.409439 |
| <i>Clptm1l</i>       | chr13:73604001-73620639   | 65.6856  | 63.8119  | -0.0418 | 0.224260 |
| <i>Ndufa6</i>        | chr15:82350138-82354291   | 141.5136 | 129.6908 | -0.1259 | 0.447189 |
| <i>5830416P10Rik</i> | chr19:53441211-53464796   | 4.1414   | 4.6466   | 0.1661  | 0.391116 |
| <i>Plod1</i>         | chr4:147909752-147936767  | 1.5841   | 1.4284   | -0.1492 | 0.373304 |
| <i>Paics</i>         | chr5:76951306-76967509    | 37.7193  | 35.6696  | -0.0806 | 0.412879 |
| <i>Camta2</i>        | chr11:70669462-70688105   | 4.0569   | 4.6025   | 0.1821  | 0.385129 |
| <i>Dph3</i>          | chr14:32080565-32085692   | 8.0158   | 7.4577   | -0.1041 | 0.387738 |
| <i>NA</i>            | chr1:133619870-133661380  | 35.3329  | 37.8594  | 0.0996  | 0.229360 |
| <i>Ncdn</i>          | chr4:126743749-126753438  | 17.6618  | 16.7688  | -0.0749 | 0.445179 |
| <i>Alyref2</i>       | chr1:171503477-171504750  | 8.4741   | 7.5641   | -0.1639 | 0.411092 |
| <i>6330416G13Rik</i> | chr4:63558780-63586357    | 12.1231  | 11.4680  | -0.0801 | 0.429249 |
| <i>Naa40</i>         | chr19:7225667-7241222     | 15.7422  | 15.1186  | -0.0583 | 0.223470 |
| <i>Mfsd1</i>         | chr3:67582767-67604231    | 24.0597  | 22.9779  | -0.0664 | 0.401814 |
| <i>Rundc3b</i>       | chr5:8490333-8622952      | 8.4486   | 7.8170   | -0.1121 | 0.394582 |
| <i>Rsf1os2</i>       | chr7:97650009-97696828    | 2.2083   | 2.4895   | 0.1729  | 0.100562 |
| <i>Cpt1a</i>         | chr19:3323300-3385732     | 22.1481  | 26.4071  | 0.2537  | 0.328161 |
| <i>Cited2</i>        | chr10:17723227-17725673   | 7.7214   | 8.8953   | 0.2042  | 0.415952 |
| <i>Cct2</i>          | chr10:117050997-117063814 | 193.9011 | 183.8726 | -0.0766 | 0.428353 |
| <i>Tbc1d10a</i>      | chr11:4186788-4215505     | 18.9193  | 18.1207  | -0.0622 | 0.261827 |
| <i>lft20</i>         | chr11:78536360-78541737   | 25.8830  | 24.2558  | -0.0937 | 0.369178 |
| <i>Cdk13</i>         | chr13:17715961-17805097   | 51.2515  | 49.7246  | -0.0436 | 0.422255 |
| <i>Eef1e1</i>        | chr13:38645697-38659028   | 21.7848  | 20.0417  | -0.1203 | 0.382313 |
| <i>Rnf44</i>         | chr13:54679398-54693907   | 9.7500   | 10.8911  | 0.1597  | 0.394950 |
| <i>Cox7c</i>         | chr13:86044815-86046904   | 16.0758  | 14.9644  | -0.1034 | 0.295742 |
| <i>Zc3hc1</i>        | chr6:30366379-30391028    | 6.5557   | 6.1950   | -0.0816 | 0.287124 |
| <i>Tgoln1</i>        | chr6:72608431-72617000    | 48.3295  | 51.2816  | 0.0855  | 0.136901 |
| <i>Zfp444</i>        | chr7:6172225-6191349      | 5.3445   | 4.9675   | -0.1055 | 0.354324 |
| <i>Myopos</i>        | chr7:18993552-19001222    | 14.9991  | 13.5636  | -0.1451 | 0.233375 |
| <i>Qpctl</i>         | chr7:19140216-19149196    | 5.2825   | 5.9358   | 0.1682  | 0.179904 |
| <i>Pold3</i>         | chr7:100082110-100121565  | 10.7029  | 11.4994  | 0.1036  | 0.132834 |
| <i>Ino80e</i>        | chr7:126851579-126862377  | 11.8578  | 11.4353  | -0.0523 | 0.147880 |
| <i>Mau2</i>          | chr8:70016122-70042734    | 49.9313  | 48.3138  | -0.0475 | 0.422950 |
| <i>Tmem65</i>        | chr15:58782268-58823530   | 8.4744   | 9.3072   | 0.1352  | 0.299293 |
| <i>Dpysl2</i>        | chr14:66802863-66868688   | 21.4256  | 23.5062  | 0.1337  | 0.316896 |
| <i>Zc3h13</i>        | chr14:75284372-75344426   | 14.1734  | 15.3936  | 0.1191  | 0.259591 |
| <i>E4f1</i>          | chr17:24443791-24455311   | 24.7843  | 23.6900  | -0.0652 | 0.386334 |
| <i>Macrocl1</i>      | chr19:7056767-7198061     | 5.2282   | 5.9655   | 0.1903  | 0.124690 |
| <i>Pydc4</i>         | chr1:173566283-173599274  | 48.9477  | 55.0491  | 0.1695  | 0.433516 |

|                      |                           |          |          |         |          |
|----------------------|---------------------------|----------|----------|---------|----------|
| <i>Wdr7</i>          | chr18:63708694-63989760   | 11.5555  | 11.1246  | -0.0548 | 0.368833 |
| <i>Plagl2</i>        | chr2:153227758-153241426  | 4.3203   | 4.8050   | 0.1534  | 0.321346 |
| <i>Tnik</i>          | chr3:28263213-28675858    | 22.1717  | 21.2755  | -0.0595 | 0.488882 |
| <i>Mtx1</i>          | chr3:89209080-89227088    | 12.1757  | 11.4961  | -0.0829 | 0.376367 |
| <i>Hspb11</i>        | chr4:107253592-107279938  | 5.5913   | 6.4099   | 0.1971  | 0.303687 |
| <i>Spata6</i>        | chr4:111719983-111829184  | 11.6453  | 11.1049  | -0.0686 | 0.356599 |
| <i>Fahd2a</i>        | chr2:127436214-127444565  | 6.6509   | 7.4485   | 0.1634  | 0.097103 |
| <i>Elf2</i>          | chr3:51255664-51340644    | 53.8112  | 52.2521  | -0.0424 | 0.239367 |
| <i>Gm26522</i>       | chr7:88278786-88283529    | 2.5958   | 3.0923   | 0.2525  | 0.276494 |
| <i>Safb</i>          | chr17:56584824-56606294   | 20.6247  | 22.2216  | 0.1076  | 0.272072 |
| <i>Nek9</i>          | chr12:85299513-85339362   | 25.2941  | 27.0489  | 0.0968  | 0.216880 |
| <i>Gm16984</i>       | chr13:34963981-34990452   | 5.1826   | 4.5673   | -0.1823 | 0.249855 |
| <i>Wrrn</i>          | chr8:33234383-33385527    | 20.7726  | 20.1666  | -0.0427 | 0.200139 |
| <i>Chkb</i>          | chr15:89416404-89429908   | 10.8715  | 10.3858  | -0.0659 | 0.354305 |
| <i>Abhd13</i>        | chr8:9977706-9992155      | 18.5960  | 17.9173  | -0.0536 | 0.352710 |
| <i>Trp53inp2</i>     | chr2:155381058-155389850  | 0.6917   | 0.8516   | 0.3000  | 0.364241 |
| <i>Dgcr6</i>         | chr16:18052859-18071632   | 1.7512   | 1.5426   | -0.1830 | 0.194903 |
| <i>Gmppa</i>         | chr1:75435929-75443179    | 17.0752  | 16.0633  | -0.0881 | 0.439043 |
| <i>Fam20b</i>        | chr1:156678544-156719001  | 9.0373   | 8.6733   | -0.0593 | 0.360940 |
| <i>Tada2a</i>        | chr11:84078919-84129600   | 2.7831   | 3.1504   | 0.1788  | 0.179267 |
| <i>Rpgrip1</i>       | chr14:52110703-52163546   | 5.1283   | 4.9411   | -0.0537 | 0.197703 |
| <i>Hmha1</i>         | chr10:80016652-80031472   | 457.3867 | 437.1684 | -0.0652 | 0.485537 |
| <i>Thoc3</i>         | chr13:54458836-54468849   | 18.3269  | 17.5471  | -0.0627 | 0.220675 |
| <i>Rest</i>          | chr5:77265490-77286432    | 23.2461  | 22.5657  | -0.0429 | 0.332396 |
| <i>Rpap2</i>         | chr5:107597372-107661838  | 10.3595  | 11.1509  | 0.1062  | 0.143758 |
| <i>Snrpa1</i>        | chr7:66060298-66074582    | 17.1018  | 16.0786  | -0.0890 | 0.397444 |
| <i>Cbr4</i>          | chr8:61487733-61503482    | 3.2477   | 3.6445   | 0.1663  | 0.160468 |
| <i>Ccnb2</i>         | chr9:70407688-70421554    | 3.5107   | 4.4123   | 0.3298  | 0.469344 |
| <i>Pde12</i>         | chr14:26659957-26669883   | 9.7478   | 9.3517   | -0.0599 | 0.343311 |
| <i>Kif11</i>         | chr19:37376402-37421859   | 3.6136   | 4.7636   | 0.3986  | 0.359428 |
| <i>Taf4b</i>         | chr18:14783244-14900359   | 8.8323   | 9.5147   | 0.1074  | 0.159381 |
| <i>Atpaf1</i>        | chr4:115784811-115818828  | 1.9266   | 2.2151   | 0.2013  | 0.071179 |
| <i>Bccip</i>         | chr7:133709332-133721145  | 16.7676  | 18.3778  | 0.1323  | 0.262888 |
| <i>Zdhhc21</i>       | chr4:82798737-82859958    | 4.6141   | 5.0168   | 0.1207  | 0.318615 |
| <i>March9</i>        | chr10:127055010-127060184 | 2.2248   | 1.9756   | -0.1714 | 0.299980 |
| <i>Nup153</i>        | chr13:46679904-46727940   | 92.7718  | 98.5542  | 0.0872  | 0.211102 |
| <i>Smco4</i>         | chr9:15505486-15545260    | 7.0516   | 8.3746   | 0.2481  | 0.446831 |
| <i>Vps13c</i>        | chr9:67840395-67995634    | 14.7131  | 16.1111  | 0.1309  | 0.399268 |
| <i>Gm13436</i>       | chr2:36807807-36808425    | 114.6185 | 104.0933 | -0.1390 | 0.495489 |
| <i>Cd302</i>         | chr2:60251992-60284488    | 3.1112   | 3.6941   | 0.2478  | 0.203042 |
| <i>Fam174b</i>       | chr7:73740306-73776919    | 1.3134   | 1.6774   | 0.3529  | 0.423828 |
| <i>Degs2</i>         | chr12:108686791-108702306 | 40.2231  | 38.2263  | -0.0735 | 0.447800 |
| <i>Aldoa</i>         | chr7:126795233-126800751  | 114.1162 | 107.7675 | -0.0826 | 0.475634 |
| <i>Heca</i>          | chr10:17900465-17948067   | 75.8904  | 74.1440  | -0.0336 | 0.216177 |
| <i>Ubc</i>           | chr5:125385964-125390202  | 42.0060  | 45.0893  | 0.1022  | 0.257904 |
| <i>Rpl19-ps11</i>    | chr8:19492905-19493623    | 15.5361  | 18.0016  | 0.2125  | 0.422035 |
| <i>Z310011J03Rik</i> | chr10:80318253-80320537   | 28.8227  | 26.9866  | -0.0950 | 0.445432 |
| <i>Hist1h2bj</i>     | chr13:22043213-22043676   | 9.3443   | 11.4882  | 0.2980  | 0.445955 |
| <i>Mdh2</i>          | chr5:135778479-135790398  | 41.6255  | 45.2568  | 0.1207  | 0.252466 |
| <i>Polr2j</i>        | chr5:136116630-136122947  | 41.7642  | 38.4785  | -0.1182 | 0.454948 |
| <i>Hpgds</i>         | chr6:65117292-65144908    | 1.5051   | 1.7536   | 0.2204  | 0.246844 |
| <i>Ruvbl1</i>        | chr6:88465408-88497572    | 7.5479   | 6.8992   | -0.1296 | 0.330772 |
| <i>Rad18</i>         | chr6:112619849-112696686  | 6.1378   | 6.6900   | 0.1243  | 0.247793 |
| <i>Dcun1d3</i>       | chr7:119853162-119896291  | 6.8963   | 6.5658   | -0.0709 | 0.293132 |
| <i>Deaf1</i>         | chr7:141297175-141327725  | 7.8960   | 7.3536   | -0.1027 | 0.355693 |
| <i>Abcc10</i>        | chr17:46303220-46328352   | 1.8712   | 2.1000   | 0.1664  | 0.259553 |
| <i>Ppm1b</i>         | chr17:84956740-85023991   | 14.6379  | 15.5103  | 0.0835  | 0.002070 |
| <i>Cdk9</i>          | chr2:32705783-32713076    | 8.6499   | 8.2815   | -0.0628 | 0.227033 |
| <i>Etohi1</i>        | chr2:178023283-178034022  | 10.9083  | 10.1510  | -0.1038 | 0.369798 |
| <i>Syt11</i>         | chr3:88744699-88775164    | 10.3010  | 12.4724  | 0.2760  | 0.355488 |
| <i>Dnttip1</i>       | chr2:164745982-164768607  | 11.3661  | 12.3202  | 0.1163  | 0.079534 |
| <i>Zfp758</i>        | chr17:22361452-22377281   | 18.2784  | 17.2874  | -0.0804 | 0.401764 |
| <i>Ndufb3</i>        | chr1:58586383-58595964    | 29.0947  | 26.5196  | -0.1337 | 0.417440 |
| <i>Smarb1</i>        | chr10:75896768-75921617   | 7.3283   | 7.8631   | 0.1016  | 0.178000 |
| <i>Bod1</i>          | chr11:31665180-31671885   | 9.5335   | 8.9209   | -0.0958 | 0.156010 |
| <i>Ppp2ca</i>        | chr11:52098680-52127778   | 44.1236  | 42.4305  | -0.0564 | 0.399048 |
| <i>Trappc12</i>      | chr12:28690628-28750453   | 25.2667  | 24.4327  | -0.0484 | 0.362477 |
| <i>F2r</i>           | chr13:95601803-95618459   | 8.1332   | 10.3370  | 0.3459  | 0.367477 |
| <i>Tbc1d19</i>       | chr5:53809626-53904380    | 1.9385   | 1.7299   | -0.1642 | 0.043900 |
| <i>E130309D02Rik</i> | chr5:143301194-143315360  | 7.4402   | 6.9830   | -0.0915 | 0.436876 |
| <i>Dfna5</i>         | chr6:50189368-50263862    | 1.1075   | 1.2726   | 0.2004  | 0.263616 |

|                      |                           |          |          |         |          |
|----------------------|---------------------------|----------|----------|---------|----------|
| <i>Tax1bp1</i>       | chr6:52713728-52766780    | 51.8908  | 55.3880  | 0.0941  | 0.229551 |
| <i>Tubgcp5</i>       | chr7:55794147-55831447    | 14.8533  | 15.8734  | 0.0958  | 0.118230 |
| <i>9030407P2ORik</i> | chr7:120673438-120677560  | 2.7536   | 2.4089   | -0.1929 | 0.400663 |
| <i>Fbxo8</i>         | chr8:56551089-56592393    | 9.2484   | 8.7289   | -0.0834 | 0.340388 |
| <i>Terf2ip</i>       | chr8:112011358-112020528  | 11.8566  | 11.1497  | -0.0887 | 0.393040 |
| <i>Akap17b</i>       | chrX:36608313-36645395    | 2.4671   | 2.2869   | -0.1094 | 0.280940 |
| <i>Acot9</i>         | chrX:155262442-155297654  | 15.3877  | 16.9235  | 0.1373  | 0.298423 |
| <i>Naga</i>          | chr15:82329531-82338826   | 16.0822  | 15.1082  | -0.0901 | 0.378211 |
| <i>Cacnb3</i>        | chr15:98632219-98644530   | 2.4707   | 2.1577   | -0.1954 | 0.433187 |
| <i>Zdhhc20</i>       | chr14:57832701-57890262   | 45.2855  | 48.1436  | 0.0883  | 0.210582 |
| <i>Vwa8</i>          | chr14:78849177-79202310   | 6.6939   | 7.3910   | 0.1429  | 0.347927 |
| <i>H2-M3</i>         | chr17:37270219-37274484   | 44.1970  | 47.7147  | 0.1105  | 0.247053 |
| <i>Crim1</i>         | chr17:78200247-78376592   | 8.9729   | 8.4120   | -0.0931 | 0.470127 |
| <i>Pigf</i>          | chr17:86997255-87025406   | 10.3402  | 9.3702   | -0.1421 | 0.300471 |
| <i>Pola2</i>         | chr19:5940542-5964206     | 13.9987  | 13.4088  | -0.0621 | 0.229694 |
| <i>Pbxip1</i>        | chr3:89436705-89450952    | 45.6789  | 43.2345  | -0.0793 | 0.536461 |
| <i>Them4</i>         | chr3:94310088-94332540    | 1.8060   | 2.0711   | 0.1975  | 0.217565 |
| <i>Rnf115</i>        | chr3:96727610-96791155    | 34.0199  | 32.4290  | -0.0691 | 0.397531 |
| <i>Junb</i>          | chr8:84976908-84978748    | 107.5633 | 119.3604 | 0.1501  | 0.411332 |
| <i>Xbp1</i>          | chr11:5520658-5525893     | 21.6348  | 23.1638  | 0.0985  | 0.182212 |
| <i>Gm10644</i>       | chr8:83932328-83955205    | 6.1730   | 7.0244   | 0.1864  | 0.377349 |
| <i>Klrd1</i>         | chr6:129591781-129598775  | 9.2483   | 8.0042   | -0.2084 | 0.476367 |
| <i>Gemin7</i>        | chr7:19564945-19573823    | 13.7383  | 12.8651  | -0.0947 | 0.272292 |
| <i>Icosl</i>         | chr10:78069359-78079525   | 2.6831   | 3.1017   | 0.2092  | 0.300751 |
| <i>Tmc4</i>          | chr7:3665789-3677524      | 2.5468   | 2.8625   | 0.1686  | 0.173126 |
| <i>Pigm</i>          | chr1:172376530-172384099  | 15.3461  | 16.4376  | 0.0991  | 0.232746 |
| <i>B230398E01Rik</i> | chr3:94959033-94962048    | 7.9782   | 8.8628   | 0.1517  | 0.241422 |
| <i>Myd88</i>         | chr9:119335933-119341411  | 26.3509  | 28.4424  | 0.1102  | 0.252405 |
| <i>Zfp933</i>        | chr4:147822985-147848366  | 7.4473   | 8.0978   | 0.1208  | 0.218862 |
| <i>Dicer1</i>        | chr12:104687741-104751952 | 22.3031  | 23.8199  | 0.0949  | 0.266426 |
| <i>Hibadh</i>        | chr6:52546227-52640389    | 17.1355  | 18.7323  | 0.1285  | 0.277586 |
| <i>Magt1</i>         | chrX:105968083-106011906  | 24.1080  | 23.0508  | -0.0647 | 0.399346 |
| <i>Tgds</i>          | chr14:118111910-118132765 | 9.3514   | 8.7648   | -0.0935 | 0.266115 |
| <i>Eme2</i>          | chr17:24888485-24895087   | 24.9024  | 23.8048  | -0.0650 | 0.495917 |
| <i>Yipf4</i>         | chr17:74489492-74500277   | 29.9685  | 28.3971  | -0.0777 | 0.405610 |
| <i>Smyd4</i>         | chr11:75348432-75405705   | 5.3095   | 4.9877   | -0.0902 | 0.281562 |
| <i>Exosc7</i>        | chr9:123113214-123136129  | 17.8243  | 16.7929  | -0.0860 | 0.398352 |
| <i>Ralbp1</i>        | chr17:65848432-65885755   | 30.0973  | 28.6601  | -0.0706 | 0.445499 |
| <i>Fip1l1</i>        | chr5:74535448-74598790    | 17.4780  | 16.9637  | -0.0431 | 0.359222 |
| <i>Snw1</i>          | chr12:87449935-87472299   | 80.3497  | 75.6762  | -0.0865 | 0.456202 |
| <i>Nup210</i>        | chr6:91013067-91116829    | 103.1107 | 98.2135  | -0.0702 | 0.538992 |
| <i>Inafm1</i>        | chr7:16272013-16273692    | 9.4311   | 8.6114   | -0.1312 | 0.454006 |
| <i>Ptgr</i>          | chr7:16906489-16910905    | 6.3298   | 5.9207   | -0.0964 | 0.317570 |
| <i>Bivm</i>          | chr1:44118956-44144770    | 2.1308   | 2.4116   | 0.1786  | 0.225959 |
| <i>Gpatch3</i>       | chr4:133574744-133584243  | 8.8066   | 8.1798   | -0.1065 | 0.378162 |
| <i>Gm16023</i>       | chr4:155608299-155624755  | 7.0077   | 6.5852   | -0.0897 | 0.198025 |
| <i>Pigl</i>          | chr11:62458459-62514417   | 4.0660   | 4.6093   | 0.1809  | 0.227830 |
| <i>Mppe1</i>         | chr18:67225529-67245830   | 42.2952  | 40.3153  | -0.0692 | 0.450675 |
| <i>Eno3</i>          | chr11:70657201-70662513   | 9.7534   | 9.0744   | -0.1041 | 0.334869 |
| <i>Gfod2</i>         | chr8:105713853-105758664  | 2.6407   | 2.4296   | -0.1202 | 0.258043 |
| <i>NA</i>            | chr9:73008480-73015657    | 11.2032  | 12.1523  | 0.1173  | 0.192969 |
| <i>Emc1</i>          | chr4:139352586-139378730  | 17.9045  | 17.1987  | -0.0580 | 0.471169 |
| <i>Gabpb2</i>        | chr3:95181765-95217916    | 25.4836  | 26.9053  | 0.0783  | 0.125277 |
| <i>Sp1</i>           | chr15:102406142-102436404 | 36.8847  | 38.9798  | 0.0797  | 0.127401 |
| <i>Nadk</i>          | chr4:155562377-155591001  | 29.6884  | 28.7361  | -0.0470 | 0.251613 |
| <i>Gm24119</i>       | chr10:91118290-91118536   | 245.7280 | 204.7287 | -0.2633 | 0.360992 |
| <i>Trbj2-4</i>       | chr6:41543361-41543410    | 212.9968 | 237.5727 | 0.1575  | 0.093882 |
| <i>Saccag8</i>       | chr1:176814659-177020437  | 8.5608   | 9.2031   | 0.1044  | 0.091772 |
| <i>Bcl2l11</i>       | chr2:128126037-128162547  | 7.4410   | 8.0433   | 0.1123  | 0.247036 |
| <i>Vkorc1l1</i>      | chr5:129942108-129984745  | 4.0683   | 4.5332   | 0.1561  | 0.212025 |
| <i>Impa2</i>         | chr18:67289252-67319146   | 5.6317   | 6.4745   | 0.2012  | 0.339444 |
| <i>Spo11</i>         | chr2:172977699-172993576  | 5.2861   | 4.9257   | -0.1019 | 0.362792 |
| <i>Ctsa</i>          | chr2:164832872-164841032  | 38.7661  | 37.2284  | -0.0584 | 0.467585 |
| <i>Elmod2</i>        | chr8:83312631-83332486    | 3.2562   | 3.5086   | 0.1077  | 0.100914 |
| <i>Trim21</i>        | chr7:102557921-102565469  | 53.0498  | 50.5709  | -0.0690 | 0.475855 |
| <i>Hspbap1</i>       | chr16:35770385-35828446   | 4.2702   | 4.6975   | 0.1376  | 0.217530 |
| <i>Neurl4</i>        | chr11:69901071-69913820   | 18.4771  | 17.7184  | -0.0605 | 0.460586 |
| <i>Nop14</i>         | chr5:34638531-34660148    | 22.2284  | 23.7221  | 0.0938  | 0.070584 |
| <i>Hexb</i>          | chr13:97176331-97198357   | 43.5569  | 41.1518  | -0.0819 | 0.452058 |
| <i>Tug1</i>          | chr11:3639784-3649673     | 44.8369  | 43.8510  | -0.0321 | 0.270692 |
| <i>Nkiras2</i>       | chr11:100619243-100627607 | 8.9358   | 8.5011   | -0.0719 | 0.348957 |

|                      |                           |           |           |         |          |
|----------------------|---------------------------|-----------|-----------|---------|----------|
| <i>Fam53a</i>        | chr5:33600350-33629635    | 10.8626   | 10.4182   | -0.0603 | 0.449718 |
| <i>Ndufb2</i>        | chr6:39592573-39603382    | 4.5826    | 5.0083    | 0.1282  | 0.185177 |
| <i>Ccnd2</i>         | chr6:127125778-127151048  | 63.8916   | 69.7398   | 0.1264  | 0.336819 |
| <i>Cd3e</i>          | chr9:44998742-45009590    | 57.2822   | 62.3815   | 0.1230  | 0.343367 |
| <i>Cnpy3</i>         | chr17:46735704-46752214   | 16.2887   | 15.5225   | -0.0695 | 0.382957 |
| <i>Rftn2</i>         | chr1:55170158-55226782    | 1.9639    | 1.7731    | -0.1475 | 0.422155 |
| <i>Yam1</i>          | chr17:39846957-39848788   | 302.8367  | 281.7538  | -0.1041 | 0.555224 |
| <i>Slc6a6</i>        | chr6:91684066-91759063    | 19.5564   | 18.8272   | -0.0548 | 0.444233 |
| <i>Xpo5</i>          | chr17:46202854-46242299   | 26.0797   | 25.1139   | -0.0544 | 0.374896 |
| <i>Sgk3</i>          | chr1:9798129-9902556      | 13.2940   | 12.5280   | -0.0856 | 0.442939 |
| <i>Zfp131</i>        | chr13:119765186-119790805 | 32.7865   | 31.0099   | -0.0804 | 0.447215 |
| <i>Phb2</i>          | chr6:124712335-124716950  | 44.5339   | 42.8135   | -0.0568 | 0.374794 |
| <i>9130011E15Rik</i> | chr19:45818143-45998488   | 4.7104    | 5.2265    | 0.1500  | 0.238838 |
| <i>Eral1</i>         | chr11:78073375-78080383   | 13.9172   | 13.1154   | -0.0856 | 0.387473 |
| <i>Tmppe</i>         | chr9:114401094-11441200   | 8.0345    | 7.5513    | -0.0895 | 0.506836 |
| <i>Hmga1</i>         | chr17:27556619-27563674   | 4.8068    | 4.3793    | -0.1344 | 0.348783 |
| <i>Rab8a</i>         | chr8:72161199-72183904    | 51.4202   | 49.0065   | -0.0694 | 0.438425 |
| <i>Rpl41</i>         | chr10:128548113-128549305 | 147.5661  | 121.1149  | -0.2850 | 0.324914 |
| <i>Bet1</i>          | chr6:4076898-4086972      | 4.6026    | 5.0643    | 0.1379  | 0.211613 |
| <i>Ap3s2</i>         | chr7:79875331-79920640    | 5.4396    | 5.0989    | -0.0933 | 0.422155 |
| <i>Gm22442</i>       | chr11:69350517-69350661   | 1713.8740 | 1922.6440 | 0.1658  | 0.433767 |
| <i>Pex5</i>          | chr6:124396815-124415067  | 14.1113   | 13.5872   | -0.0546 | 0.312092 |
| <i>Tarbp2</i>        | chr15:102518191-102523676 | 5.2537    | 5.6941    | 0.1161  | 0.070728 |
| <i>Gstt2</i>         | chr10:75831844-75834881   | 12.5462   | 11.5900   | -0.1144 | 0.385285 |
| <i>BlvrB</i>         | chr7:27447977-27466144    | 2.6025    | 3.0549    | 0.2312  | 0.117349 |
| <i>E430018J23Rik</i> | chr7:127389672-127393629  | 5.2652    | 5.8410    | 0.1497  | 0.268453 |
| <i>Sh2d2a</i>        | chr3:87846754-87855722    | 21.1231   | 22.6146   | 0.0984  | 0.237478 |
| <i>Ercc6</i>         | chr14:32513520-32580989   | 16.8920   | 16.3373   | -0.0482 | 0.414996 |
| <i>Lgmn</i>          | chr12:102394083-102439813 | 13.3119   | 12.4630   | -0.0951 | 0.433686 |
| <i>Ap5s1</i>         | chr2:131207077-131213514  | 7.4947    | 6.8426    | -0.1313 | 0.353954 |
| <i>Sbf2</i>          | chr7:110308012-110614922  | 0.7118    | 0.8184    | 0.2014  | 0.315204 |
| <i>Zfp169</i>        | chr13:48487646-48513451   | 6.3922    | 7.0364    | 0.1385  | 0.373743 |
| <i>Pde6b</i>         | chr5:108388390-108432397  | 1.5993    | 1.4106    | -0.1811 | 0.425451 |
| <i>Gm6225</i>        | chr18:3336415-3366863     | 2.2124    | 2.6178    | 0.2427  | 0.263531 |
| <i>Pa2g4</i>         | chr10:12857765-128565934  | 23.4677   | 25.4429   | 0.1166  | 0.240336 |
| <i>2410006H16Rik</i> | chr11:62602876-62604807   | 121.0242  | 133.0308  | 0.1365  | 0.347095 |
| <i>Gm5d</i>          | chr13:31819578-32338712   | 2.3127    | 2.1000    | -0.1392 | 0.160466 |
| <i>Zfp280d</i>       | chr9:72274898-72363770    | 23.1666   | 24.7197   | 0.0936  | 0.169433 |
| <i>Mnt</i>           | chr11:74830919-74845725   | 4.3355    | 4.9175    | 0.1817  | 0.415889 |
| <i>Pomt2</i>         | chr12:87106865-87147902   | 2.9273    | 2.7019    | -0.1156 | 0.383744 |
| <i>Tarsl2</i>        | chr7:65644897-65692091    | 3.9634    | 3.6638    | -0.1134 | 0.411862 |
| <i>Polr3gl</i>       | chr3:96577871-96594181    | 14.0824   | 13.1012   | -0.1042 | 0.416817 |
| <i>Gm27003</i>       | chr2:126675915-126683805  | 8.7573    | 7.7421    | -0.1778 | 0.101165 |
| <i>Tmsb10</i>        | chr6:72957346-72958748    | 54.5258   | 60.5521   | 0.1512  | 0.377745 |
| <i>5430416N02Rik</i> | chr5:100420841-100429516  | 9.4420    | 8.8687    | -0.0904 | 0.434510 |
| <i>Gm13856</i>       | chr6:34151928-34174235    | 2.5118    | 2.9013    | 0.2079  | 0.055060 |
| <i>Trmt1l</i>        | chr1:151428647-151458182  | 26.7048   | 25.7812   | -0.0508 | 0.294324 |
| <i>Hint2</i>         | chr4:43654226-43656466    | 6.1582    | 6.9291    | 0.1702  | 0.260190 |
| <i>Gna15</i>         | chr10:81502305-81524225   | 2.5590    | 3.1634    | 0.3059  | 0.474108 |
| <i>Atp5sl</i>        | chr7:25619413-25625551    | 18.6127   | 17.7119   | -0.0716 | 0.424996 |
| <i>Tpt1</i>          | chr14:75845092-75848525   | 17.6033   | 19.7036   | 0.1626  | 0.428232 |
| <i>Srbd1</i>         | chr17:85984664-86145175   | 11.0481   | 11.8987   | 0.1070  | 0.149900 |
| <i>2410004N09Rik</i> | chr18:33794891-33795986   | 35.6282   | 39.2357   | 0.1391  | 0.171906 |
| <i>Erp44</i>         | chr4:48193322-48279558    | 16.0843   | 17.2027   | 0.0970  | 0.142138 |
| <i>Mrpl10</i>        | chr11:97041559-97049213   | 31.7503   | 30.1162   | -0.0762 | 0.404899 |
| <i>Ap1m2</i>         | chr9:21295456-21312333    | 2.6897    | 2.1584    | -0.3175 | 0.485639 |
| <i>Fam35a</i>        | chr14:34237040-34310503   | 9.0956    | 8.5834    | -0.0836 | 0.357626 |
| <i>Setdb2</i>        | chr14:59402008-59440884   | 16.8966   | 16.3306   | -0.0492 | 0.223888 |
| <i>Scd2</i>          | chr19:44293675-44306864   | 15.7654   | 17.2885   | 0.1331  | 0.344202 |
| <i>Fam13b</i>        | chr18:34442351-34506823   | 32.6662   | 35.1891   | 0.1073  | 0.271529 |
| <i>Tmem198b</i>      | chr10:128800035-128804370 | 1.8513    | 2.1064    | 0.1862  | 0.077088 |
| <i>Utp20</i>         | chr10:88746606-88826814   | 17.2602   | 16.5591   | -0.0598 | 0.462086 |
| <i>Kptn</i>          | chr7:16119894-16127516    | 5.6827    | 5.3502    | -0.0870 | 0.233694 |
| <i>Rps26-ps1</i>     | chr8:107439175-107439585  | 14.1737   | 11.8626   | -0.2568 | 0.448757 |
| <i>Cfdp1</i>         | chr8:111768472-111854310  | 53.8859   | 49.8712   | -0.1117 | 0.458055 |
| <i>Rnf26</i>         | chr9:44066326-44113517    | 1.0923    | 1.2729    | 0.2208  | 0.246270 |
| <i>Tceanc</i>        | chrX:166499811-166518567  | 4.1034    | 4.4949    | 0.1315  | 0.146810 |
| <i>Klf10</i>         | chr15:38294412-38300707   | 9.3414    | 10.5136   | 0.1705  | 0.434574 |
| <i>Zfp472</i>        | chr17:32965813-32979233   | 15.3914   | 14.5655   | -0.0796 | 0.345896 |
| <i>Dzip3</i>         | chr16:48924231-48994165   | 3.6427    | 3.4265    | -0.0883 | 0.445334 |
| <i>Cspp1</i>         | chr1:10038217-10136768    | 6.3796    | 6.8671    | 0.1062  | 0.233345 |



|                      |                          |          |          |         |          |
|----------------------|--------------------------|----------|----------|---------|----------|
| <i>Ggt7</i>          | chr2:155490378-155518237 | 2.9729   | 2.5828   | -0.2029 | 0.521518 |
| <i>Apoa1bp</i>       | chr3:88056522-88058495   | 36.4341  | 34.4395  | -0.0812 | 0.396606 |
| <i>Kbtbd2</i>        | chr6:56777523-56797813   | 40.7226  | 39.4387  | -0.0462 | 0.410737 |
| <i>Med31</i>         | chr11:72211723-72215592  | 5.7437   | 5.2422   | -0.1318 | 0.289293 |
| <i>Trbj2-6</i>       | chr6:41543597-41543645   | 147.0548 | 125.5925 | -0.2276 | 0.493597 |
| <i>Lamtor4</i>       | chr5:138255607-138259398 | 24.4883  | 23.0206  | -0.0892 | 0.371619 |
| <i>St8sia1</i>       | chr6:142821544-142964452 | 12.6043  | 13.6338  | 0.1133  | 0.327947 |
| <i>Trpc2</i>         | chr7:102065510-102096864 | 6.5553   | 6.3037   | -0.0564 | 0.307261 |
| <i>NA</i>            | chr8:95323013-95325263   | 4.8515   | 5.5840   | 0.2029  | 0.369958 |
| <i>Cmc1</i>          | chr9:118064528-118150196 | 14.3169  | 16.1332  | 0.1723  | 0.371702 |
| <i>Uprt</i>          | chrX:104482817-104507490 | 4.7289   | 5.2588   | 0.1532  | 0.167455 |
| <i>Twsg1</i>         | chr17:65923065-65951187  | 11.7054  | 12.9530  | 0.1461  | 0.402503 |
| <i>Calm2</i>         | chr17:87433411-87446935  | 76.2112  | 71.3210  | -0.0957 | 0.475453 |
| <i>Zbtb46</i>        | chr2:181387761-181459426 | 2.4529   | 2.7452   | 0.1624  | 0.369419 |
| <i>Ube2q1</i>        | chr3:89773608-89783997   | 43.4876  | 41.8360  | -0.0559 | 0.377698 |
| <i>Polr2e</i>        | chr10:80035948-80039795  | 17.6457  | 19.0197  | 0.1082  | 0.188516 |
| <i>Tmem256</i>       | chr11:69838513-69839618  | 6.7830   | 5.7691   | -0.2336 | 0.435811 |
| <i>Clock</i>         | chr5:76212176-76304548   | 9.2246   | 9.8780   | 0.0987  | 0.220883 |
| <i>Tgfbf2</i>        | chr9:116087697-116175363 | 117.5499 | 114.6543 | -0.0360 | 0.453121 |
| <i>Nelfb</i>         | chr2:25199711-25211489   | 30.2082  | 29.4469  | -0.0368 | 0.178906 |
| <i>Tprn</i>          | chr2:25262617-25269885   | 5.5990   | 5.2558   | -0.0912 | 0.111879 |
| <i>Eif3j1</i>        | chr2:122028545-122056598 | 2.8173   | 3.1085   | 0.1419  | 0.196643 |
| <i>Akr1a1</i>        | chr4:116636509-116651680 | 66.5454  | 62.8861  | -0.0816 | 0.490705 |
| <i>M6pr</i>          | chr6:122308719-122317680 | 53.8695  | 51.7361  | -0.0583 | 0.445471 |
| <i>Glb1l</i>         | chr1:75198242-75210778   | 4.6578   | 5.0313   | 0.1113  | 0.085392 |
| <i>Gm13199</i>       | chr2:5862079-5862934     | 7.1544   | 6.3956   | -0.1618 | 0.207002 |
| <i>Tti1</i>          | chr2:157981802-158028433 | 15.2181  | 14.6811  | -0.0518 | 0.260982 |
| <i>Zfp146</i>        | chr7:30161273-30169727   | 36.6486  | 35.4066  | -0.0497 | 0.275937 |
| <i>Fam186b</i>       | chr15:99271017-99287180  | 1.6194   | 1.4383   | -0.1711 | 0.258025 |
| <i>Gm9392</i>        | chr7:46820266-46822048   | 2.5659   | 2.9956   | 0.2234  | 0.224790 |
| <i>Gmip</i>          | chr8:69808678-69821870   | 28.6692  | 27.7491  | -0.0471 | 0.464437 |
| <i>Zcchc9</i>        | chr13:91796532-91807705  | 16.0816  | 15.2939  | -0.0725 | 0.399976 |
| <i>Alg6</i>          | chr4:99715663-99763460   | 1.0363   | 1.1716   | 0.1770  | 0.263525 |
| <i>4833422C13Rik</i> | chr13:91701664-91741872  | 1.3904   | 1.5898   | 0.1934  | 0.286167 |
| <i>Zfp809</i>        | chr9:22225713-22243197   | 20.5858  | 19.5105  | -0.0774 | 0.292371 |
| <i>Med11</i>         | chr11:70451918-70453727  | 38.2368  | 35.7211  | -0.0982 | 0.450950 |
| <i>Ccr7</i>          | chr11:99144195-99155077  | 279.2535 | 270.0831 | -0.0482 | 0.487371 |
| <i>Lnx1</i>          | chr5:74592445-74702911   | 3.0016   | 3.3353   | 0.1521  | 0.207726 |
| <i>Gm26582</i>       | chr5:92043063-92055960   | 51.8996  | 49.8514  | -0.0581 | 0.430847 |
| <i>Pim2</i>          | chrX:7878261-7883432     | 11.3088  | 12.6249  | 0.1588  | 0.378184 |
| <i>Eif2s1</i>        | chr12:78861818-78887010  | 28.1166  | 26.3562  | -0.0933 | 0.461292 |
| <i>Edem3</i>         | chr1:151755373-151822328 | 19.7851  | 18.9431  | -0.0627 | 0.456336 |
| <i>Gid4</i>          | chr11:60417144-60450927  | 11.0115  | 10.4922  | -0.0697 | 0.395425 |
| <i>Ssbp2</i>         | chr13:91460282-91703429  | 5.6837   | 6.1130   | 0.1051  | 0.142237 |
| <i>Loh12cr1</i>      | chr6:134639626-134711184 | 7.4650   | 6.9011   | -0.1133 | 0.338055 |
| <i>Gm16794</i>       | chr9:95942048-95959393   | 4.1587   | 4.6340   | 0.1561  | 0.272236 |
| <i>Mgat5</i>         | chr1:127204985-127483704 | 8.6273   | 9.3355   | 0.1138  | 0.221582 |
| <i>Uap11</i>         | chr2:25359888-25365682   | 3.7733   | 4.1593   | 0.1405  | 0.231467 |
| <i>Gm26516</i>       | chr4:130774816-130779246 | 3.7513   | 3.2505   | -0.2067 | 0.405879 |
| <i>Tomt</i>          | chr7:101898372-101906359 | 5.3624   | 4.9758   | -0.1079 | 0.307907 |
| <i>lws1</i>          | chr18:32067733-32104331  | 26.2005  | 25.5049  | -0.0388 | 0.330231 |
| <i>Sec63</i>         | chr10:42761495-42832514  | 13.6134  | 14.5408  | 0.0951  | 0.236165 |
| <i>Gimap3</i>        | chr6:48765088-48766519   | 396.1123 | 381.3187 | -0.0549 | 0.506666 |
| <i>Slc30a9</i>       | chr5:67306954-67358565   | 10.9403  | 10.5241  | -0.0560 | 0.435794 |
| <i>Mpg</i>           | chr11:32226504-32232700  | 10.3071  | 11.2110  | 0.1213  | 0.291631 |
| <i>Srebfl</i>        | chr11:60199088-60222581  | 25.4629  | 24.4750  | -0.0571 | 0.495144 |
| <i>Stim2</i>         | chr5:53998416-54121057   | 21.6210  | 20.9473  | -0.0457 | 0.360574 |
| <i>Rhbdd2</i>        | chr5:135632617-135646448 | 3.0620   | 3.4077   | 0.1543  | 0.342574 |
| <i>Mesdc1</i>        | chr7:83880494-83884341   | 4.4307   | 4.0647   | -0.1244 | 0.499008 |
| <i>Dlat</i>          | chr9:50634632-50659780   | 9.6256   | 9.2268   | -0.0610 | 0.276265 |
| <i>Mapk14</i>        | chr17:28691341-28748404  | 31.8918  | 34.0539  | 0.0946  | 0.182348 |
| <i>Creg1</i>         | chr1:165763745-165775308 | 8.9674   | 8.2594   | -0.1186 | 0.429337 |
| <i>Phpt1</i>         | chr2:25573429-25575224   | 14.3751  | 13.0782  | -0.1364 | 0.442612 |
| <i>Scamp3</i>        | chr3:89177472-89182765   | 29.9949  | 32.4586  | 0.1139  | 0.272818 |
| <i>Ilk</i>           | chr7:105736591-105742925 | 45.9185  | 44.2892  | -0.0521 | 0.404413 |
| <i>Man2c1os</i>      | chr9:57099949-57131290   | 9.5983   | 10.4685  | 0.1252  | 0.204336 |
| <i>Tspan5</i>        | chr3:138742194-138904433 | 4.6900   | 5.1763   | 0.1423  | 0.306411 |
| <i>D430042O09Rik</i> | chr7:125707914-125874793 | 4.4032   | 4.1761   | -0.0764 | 0.363928 |
| <i>Trdmt1</i>        | chr2:13509013-13544664   | 4.3902   | 4.0834   | -0.1045 | 0.330285 |
| <i>Otud3</i>         | chr4:138895378-138913945 | 6.9528   | 6.3532   | -0.1301 | 0.380831 |
| <i>Csnk2a2</i>       | chr8:95446095-95488820   | 7.6855   | 8.4212   | 0.1319  | 0.255455 |

|                      |                           |          |          |         |          |
|----------------------|---------------------------|----------|----------|---------|----------|
| <i>Pltp</i>          | chr2:164839517-164857711  | 3.3529   | 3.7822   | 0.1738  | 0.223450 |
| <i>Slc2a9</i>        | chr5:38349272-38503143    | 4.8574   | 4.5619   | -0.0906 | 0.455120 |
| <i>Pla2g15</i>       | chr8:106150398-106164713  | 3.4602   | 3.1200   | -0.1493 | 0.423930 |
| <i>Ms4a6b</i>        | chr19:11516511-11531256   | 423.7667 | 454.7689 | 0.1019  | 0.321492 |
| <i>Tspyl2</i>        | chrX:152336851-152342425  | 15.8833  | 17.0433  | 0.1017  | 0.158621 |
| <i>Foxo1</i>         | chr3:52268336-52350109    | 24.4981  | 27.4165  | 0.1624  | 0.455120 |
| <i>Mettl9</i>        | chr7:121034444-121076834  | 44.5677  | 41.4663  | -0.1041 | 0.496694 |
| <i>Idua</i>          | chr5:108660330-108684557  | 7.0750   | 7.6915   | 0.1205  | 0.245405 |
| <i>NA</i>            | chr9:57148179-57151937    | 1.0112   | 1.1903   | 0.2354  | 0.220565 |
| <i>Smg7</i>          | chr1:152836995-152902646  | 30.5585  | 29.7370  | -0.0393 | 0.420981 |
| <i>Nup214</i>        | chr2:31974435-32053975    | 9.2316   | 10.0274  | 0.1193  | 0.343595 |
| <i>Vps33a</i>        | chr5:123528763-123573015  | 15.0712  | 14.5168  | -0.0541 | 0.350852 |
| <i>C530005A16Rik</i> | chr4:116589732-116597630  | 10.0392  | 10.8716  | 0.1149  | 0.111407 |
| <i>Hyi</i>           | chr4:118359989-118362744  | 8.3921   | 9.1213   | 0.1202  | 0.081414 |
| <i>Cabp7</i>         | chr11:4736891-4746778     | 4.2200   | 3.8949   | -0.1156 | 0.244017 |
| <i>Il12rb2</i>       | chr6:67291317-67376188    | 3.6801   | 4.1244   | 0.1645  | 0.318102 |
| <i>Aebp2</i>         | chr6:140622448-140678472  | 18.4544  | 19.7594  | 0.0986  | 0.263783 |
| <i>Tmem41b</i>       | chr7:109972186-109986929  | 3.5382   | 3.3100   | -0.0962 | 0.311889 |
| <i>Pdpr</i>          | chr8:111094629-111137074  | 17.5743  | 18.6586  | 0.0864  | 0.166086 |
| <i>Agpat4</i>        | chr17:12118703-12219645   | 2.1208   | 2.4450   | 0.2053  | 0.292218 |
| <i>Acap2</i>         | chr16:31092412-31201238   | 25.3725  | 27.1458  | 0.0975  | 0.255677 |
| <i>Dnajc24</i>       | chr2:105966708-106003549  | 7.2323   | 8.0629   | 0.1568  | 0.229065 |
| <i>Trappc3</i>       | chr4:126262324-126275883  | 22.1020  | 20.6913  | -0.0952 | 0.437787 |
| <i>Pank4</i>         | chr4:154964122-154980938  | 32.7184  | 31.7638  | -0.0427 | 0.391737 |
| <i>Gm17305</i>       | chr11:69364018-69369408   | 117.9174 | 112.0852 | -0.0732 | 0.466434 |
| <i>Glrx2</i>         | chr1:143739028-143749676  | 5.1284   | 5.5432   | 0.1122  | 0.112017 |
| <i>Dkc1</i>          | chrX:75095853-75109777    | 27.1671  | 26.0463  | -0.0608 | 0.400697 |
| <i>Zfp563</i>        | chr17:33089309-33106203   | 4.8587   | 4.4694   | -0.1205 | 0.307683 |
| <i>Stam2</i>         | chr2:52691663-52742281    | 6.8323   | 7.3591   | 0.1072  | 0.235057 |
| <i>Lta</i>           | chr17:35203164-35205351   | 8.1402   | 8.9985   | 0.1446  | 0.098329 |
| <i>Manba</i>         | chr3:135485610-135571404  | 5.8586   | 6.3165   | 0.1086  | 0.244513 |
| <i>Eij4ebp2</i>      | chr10:61432496-61452669   | 13.7457  | 15.4375  | 0.1675  | 0.408068 |
| <i>Tsfm</i>          | chr10:127011571-127030840 | 5.4019   | 4.9941   | -0.1132 | 0.345577 |
| <i>Atxn2l</i>        | chr7:126491707-126503437  | 18.6514  | 20.7899  | 0.1566  | 0.448295 |
| <i>Cep164</i>        | chr9:45766945-45828691    | 9.1190   | 8.7925   | -0.0526 | 0.349779 |
| <i>Gm26631</i>       | chr9:57531286-57537629    | 6.4811   | 7.0892   | 0.1294  | 0.153797 |
| <i>Safb2</i>         | chr17:56560964-56584585   | 13.3497  | 14.5010  | 0.1193  | 0.361090 |
| <i>Gm15834</i>       | chr1:58505147-58523230    | 1.3082   | 1.4849   | 0.1829  | 0.134958 |
| <i>C1d</i>           | chr11:17257578-17269176   | 7.9495   | 8.8501   | 0.1548  | 0.401106 |
| <i>Psmc3ip</i>       | chr11:101091822-101095436 | 10.6561  | 9.9225   | -0.1029 | 0.366657 |
| <i>Cep95</i>         | chr11:106789251-106819930 | 21.4918  | 20.6407  | -0.0583 | 0.401298 |
| <i>Recql4</i>        | chr15:76703552-76710559   | 1.2703   | 1.4791   | 0.2195  | 0.254342 |
| <i>Thumpd2</i>       | chr17:81026326-81065085   | 11.5661  | 10.7625  | -0.1039 | 0.411316 |
| <i>Nmt2</i>          | chr2:3284211-3328877      | 11.4134  | 10.8471  | -0.0734 | 0.478075 |
| <i>Atp9a</i>         | chr2:168634437-168742409  | 1.4311   | 1.7084   | 0.2555  | 0.475111 |
| <i>Dync1li2</i>      | chr8:104417673-104443047  | 20.5141  | 21.7551  | 0.0847  | 0.120753 |
| <i>Mapk7</i>         | chr11:61488811-61494406   | 7.0711   | 6.5994   | -0.0996 | 0.492461 |
| <i>Sergef</i>        | chr7:46443167-46639807    | 3.9785   | 3.6581   | -0.1211 | 0.274706 |
| <i>Inip</i>          | chr4:59769636-59801589    | 11.1970  | 10.5976  | -0.0794 | 0.437342 |
| <i>Acrbp</i>         | chr6:125049688-125063267  | 5.4574   | 5.0085   | -0.1238 | 0.489951 |
| <i>Spryd7</i>        | chr14:61531992-61556886   | 3.4397   | 3.1475   | -0.1281 | 0.415991 |
| <i>Creb3</i>         | chr4:43562331-43567060    | 28.2904  | 27.0276  | -0.0659 | 0.400963 |
| <i>Adnp2</i>         | chr18:80126337-80151482   | 8.9968   | 9.6166   | 0.0961  | 0.119027 |
| <i>Rce1</i>          | chr19:4622550-4625617     | 19.9367  | 18.8643  | -0.0798 | 0.350431 |
| <i>B430306N03Rik</i> | chr17:48316140-48327024   | 3.0640   | 2.7998   | -0.1301 | 0.514713 |
| <i>Mroh1</i>         | chr15:76380260-76453038   | 4.0529   | 4.3610   | 0.1057  | 0.270149 |
| <i>Psmc6</i>         | chr14:14112183-14120984   | 34.3181  | 32.6074  | -0.0738 | 0.443107 |
| <i>Dad1</i>          | chr14:54235478-54254104   | 19.2022  | 18.2099  | -0.0766 | 0.458077 |
| <i>Cebpzos</i>       | chr17:78916498-78921037   | 11.1298  | 12.4778  | 0.1649  | 0.361697 |
| <i>Mthfd2</i>        | chr6:83305690-83317606    | 25.1624  | 24.0614  | -0.0645 | 0.425369 |
| <i>Tnfaip3</i>       | chr10:19000909-19015657   | 14.7677  | 16.0370  | 0.1190  | 0.370736 |
| <i>Gna11</i>         | chr10:81528723-81545190   | 7.1221   | 6.7139   | -0.0852 | 0.457507 |
| <i>Med9</i>          | chr11:59948205-59962205   | 4.9665   | 5.4956   | 0.1461  | 0.014369 |
| <i>Timm9</i>         | chr12:71123172-71136675   | 15.1694  | 13.8642  | -0.1298 | 0.442993 |
| <i>Rabggtb</i>       | chr3:153907288-153912966  | 41.8184  | 40.0196  | -0.0634 | 0.362847 |
| <i>Cby1</i>          | chr15:79659226-79667660   | 6.9351   | 6.3346   | -0.1307 | 0.230712 |
| <i>Lrrc20</i>        | chr10:61475832-61582226   | 2.9940   | 2.6947   | -0.1519 | 0.381849 |
| <i>Mdh1</i>          | chr11:21556786-21572367   | 52.0447  | 49.5016  | -0.0723 | 0.465280 |
| <i>Lsm11</i>         | chr11:45928268-45944935   | 6.8221   | 6.4705   | -0.0763 | 0.453768 |
| <i>Relb</i>          | chr7:19606216-19629438    | 13.0565  | 14.3573  | 0.1370  | 0.373500 |
| <i>Fchs2</i>         | chr7:101108774-101284405  | 8.9039   | 9.5633   | 0.1031  | 0.265982 |

|                 |                           |          |          |         |          |
|-----------------|---------------------------|----------|----------|---------|----------|
| <i>Smpd1</i>    | chr7:105554359-105558388  | 14.6725  | 14.0403  | -0.0635 | 0.301094 |
| <i>Oat</i>      | chr7:132557474-132576398  | 33.0302  | 31.5422  | -0.0665 | 0.420731 |
| <i>Tmed1</i>    | chr9:21507379-21510186    | 11.8057  | 11.0421  | -0.0965 | 0.406507 |
| <i>Rbm5</i>     | chr9:107740370-107770996  | 41.3521  | 40.3164  | -0.0366 | 0.451538 |
| <i>Xkrx</i>     | chrX:134149042-134162076  | 1.9761   | 2.2863   | 0.2104  | 0.281477 |
| <i>Naa16</i>    | chr14:79334203-79390778   | 6.4903   | 6.9700   | 0.1029  | 0.183826 |
| <i>Ndufa11</i>  | chr17:56717761-56724248   | 8.2496   | 7.7420   | -0.0916 | 0.369518 |
| <i>Tnfsf14</i>  | chr17:57189491-57194189   | 2.6678   | 3.1972   | 0.2612  | 0.432806 |
| <i>Stam</i>     | chr2:14074099-14148338    | 7.3577   | 7.8957   | 0.1018  | 0.150816 |
| <i>Ubr3</i>     | chr2:69897245-70024013    | 13.9377  | 14.9522  | 0.1014  | 0.289635 |
| <i>Dap3</i>     | chr3:88920802-88951181    | 14.2994  | 13.8658  | -0.0444 | 0.197464 |
| <i>Smu1</i>     | chr4:40736541-40757923    | 45.4203  | 43.3603  | -0.0670 | 0.445682 |
| <i>Cherp</i>    | chr8:72460488-72475233    | 7.2539   | 8.1873   | 0.1746  | 0.434815 |
| <i>Rbl1</i>     | chr2:157145892-157204534  | 18.5811  | 19.7763  | 0.0899  | 0.218237 |
| <i>Socs7</i>    | chr11:97362550-97398542   | 7.0826   | 6.7153   | -0.0768 | 0.467500 |
| <i>Haus3</i>    | chr5:34153920-34169445    | 21.0375  | 22.5867  | 0.1025  | 0.181760 |
| <i>Smim14</i>   | chr5:65446843-65537184    | 11.4380  | 10.9015  | -0.0693 | 0.465190 |
| <i>Car12</i>    | chr9:66713685-66766845    | 0.8660   | 1.0155   | 0.2298  | 0.208879 |
| <i>Ubxn4</i>    | chr1:128244180-128279377  | 40.8443  | 39.0237  | -0.0658 | 0.486650 |
| <i>Snora44</i>  | chr4:132309940-132310069  | 39.7638  | 34.3761  | -0.2100 | 0.397039 |
| <i>Gm20390</i>  | chr11:93949818-93968293   | 79.0920  | 73.6164  | -0.1035 | 0.500758 |
| <i>Pdcd6ip</i>  | chr9:113651743-113708259  | 17.2890  | 18.6480  | 0.1092  | 0.346413 |
| <i>Hip1r</i>    | chr5:123973627-124003211  | 7.1814   | 8.7966   | 0.2927  | 0.375592 |
| <i>Trac</i>     | chr14:54220520-54223097   | 823.7403 | 876.0493 | 0.0888  | 0.213575 |
| <i>Prmt3</i>    | chr7:49778345-49858265    | 26.6290  | 25.8066  | -0.0453 | 0.285494 |
| <i>Trbv15</i>   | chr6:41141210-41141658    | 157.4767 | 146.7046 | -0.1022 | 0.485393 |
| <i>Arhgef18</i> | chr8:3393005-3456601      | 72.5879  | 70.0470  | -0.0514 | 0.524043 |
| <i>Adam9</i>    | chr8:24949610-25016922    | 1.6150   | 1.8531   | 0.1984  | 0.295963 |
| <i>Mak16</i>    | chr8:31159467-31168724    | 72.2430  | 69.0678  | -0.0648 | 0.449853 |
| <i>Sh3rf1</i>   | chr8:61224170-61396072    | 2.8194   | 3.1653   | 0.1669  | 0.359080 |
| <i>Cog2</i>     | chr8:124520766-124552008  | 14.7758  | 14.2737  | -0.0499 | 0.363871 |
| <i>Timm8b</i>   | chr9:50603900-50605320    | 38.3757  | 34.4875  | -0.1541 | 0.470741 |
| <i>Zfp445</i>   | chr9:122851913-122862128  | 44.2574  | 46.9285  | 0.0845  | 0.204590 |
| <i>Calhm2</i>   | chr19:47105352-47138294   | 4.6479   | 5.1073   | 0.1360  | 0.295108 |
| <i>Mis18a</i>   | chr16:90719311-90727404   | 10.8443  | 10.3125  | -0.0725 | 0.333059 |
| <i>Hpcal1</i>   | chr12:17690813-17791926   | 26.0814  | 28.1721  | 0.1112  | 0.279926 |
| <i>Pdcd5</i>    | chr7:35641981-35647521    | 4.7239   | 5.3272   | 0.1734  | 0.367094 |
| <i>Btaf1</i>    | chr19:36926078-37012752   | 32.4708  | 31.3009  | -0.0529 | 0.454932 |
| <i>Timm44</i>   | chr8:4259730-4275913      | 18.1560  | 17.6144  | -0.0437 | 0.185842 |
| <i>Trav14-3</i> | chr14:53763082-53765043   | 6.2850   | 5.5673   | -0.1749 | 0.344693 |
| <i>Kpna3</i>    | chr14:61365185-61439947   | 13.0186  | 14.0780  | 0.1129  | 0.306753 |
| <i>Erbp3</i>    | chr10:128567522-128589652 | 2.1572   | 3.2040   | 0.5707  | 0.286471 |
| <i>Imp3</i>     | chr9:56937499-56938397    | 57.5321  | 54.8085  | -0.0700 | 0.402509 |
| <i>Got2</i>     | chr8:95864133-95888547    | 11.6522  | 12.5950  | 0.1122  | 0.219446 |
| <i>Cs</i>       | chr10:128337831-128362479 | 66.1468  | 64.3047  | -0.0407 | 0.379070 |
| <i>Arl6ip1</i>  | chr7:118118890-118129625  | 98.5342  | 94.1716  | -0.0653 | 0.479623 |
| <i>Rfx1</i>     | chr8:84066835-84096992    | 15.0696  | 16.3119  | 0.1143  | 0.320324 |
| <i>Cdk1</i>     | chr10:69336634-69352938   | 1.1068   | 1.3683   | 0.3059  | 0.487371 |
| <i>Pwp1</i>     | chr10:85871830-85889096   | 21.0919  | 20.2627  | -0.0579 | 0.329176 |
| <i>Gm12592</i>  | chr11:3305425-3331178     | 12.1475  | 11.6406  | -0.0615 | 0.303540 |
| <i>Cfap36</i>   | chr11:29221531-29247409   | 6.8197   | 7.4724   | 0.1319  | 0.268470 |
| <i>Aff4</i>     | chr11:53350832-53421830   | 21.7384  | 23.0465  | 0.0843  | 0.242519 |
| <i>Rpl26</i>    | chr11:68901582-68906989   | 135.9374 | 125.8160 | -0.1116 | 0.529562 |
| <i>Batf</i>     | chr12:85686668-85709087   | 42.2396  | 47.2825  | 0.1627  | 0.479368 |
| <i>Calm1</i>    | chr12:100199434-100209806 | 170.4562 | 160.9085 | -0.0832 | 0.508986 |
| <i>Ccdc88c</i>  | chr12:100912699-101028983 | 82.4269  | 79.1879  | -0.0578 | 0.547445 |
| <i>Phf2</i>     | chr13:48801749-48870885   | 13.0709  | 14.3481  | 0.1345  | 0.422847 |
| <i>Faf2</i>     | chr13:54621783-54664068   | 16.8649  | 16.3376  | -0.0458 | 0.341075 |
| <i>Med10</i>    | chr13:69809881-69816094   | 31.9119  | 34.5097  | 0.1129  | 0.163770 |
| <i>Cpeb2</i>    | chr5:43233462-43289724    | 1.8147   | 1.6454   | -0.1413 | 0.505311 |
| <i>Exoc1</i>    | chr5:76529310-76570294    | 12.0797  | 11.6870  | -0.0477 | 0.446283 |
| <i>Sap25</i>    | chr5:137641333-137642902  | 31.1325  | 29.2417  | -0.0904 | 0.533680 |
| <i>Gm24082</i>  | chr5:138606698-138606781  | 51.4490  | 45.5667  | -0.1752 | 0.176188 |
| <i>Casp2</i>    | chr6:42264984-42282508    | 17.3620  | 16.9315  | -0.0362 | 0.327499 |
| <i>Hist4h4</i>  | chr6:136801552-136804431  | 14.9547  | 12.2019  | -0.2935 | 0.354245 |
| <i>Golt1b</i>   | chr6:142387220-142403858  | 13.6038  | 13.0325  | -0.0619 | 0.247940 |
| <i>Tgfb1</i>    | chr7:25687001-25705077    | 15.5317  | 17.5432  | 0.1757  | 0.464645 |
| <i>Herc2</i>    | chr7:56050154-56231794    | 40.4300  | 38.7826  | -0.0600 | 0.551171 |
| <i>Trim34a</i>  | chr7:104244456-104340693  | 20.1877  | 21.9583  | 0.1213  | 0.365192 |
| <i>Mphosph6</i> | chr8:117791644-117801929  | 10.9185  | 12.2997  | 0.1719  | 0.368092 |
| <i>Rexo2</i>    | chr9:48468513-48480611    | 55.7016  | 52.0229  | -0.0986 | 0.476883 |

|                      |                           |           |           |         |          |
|----------------------|---------------------------|-----------|-----------|---------|----------|
| <i>Nudt16</i>        | chr9:105129337-105131805  | 24.6741   | 23.2972   | -0.0828 | 0.431242 |
| <i>Il7r</i>          | chr15:9506160-9529876     | 202.9877  | 195.8521  | -0.0516 | 0.525043 |
| <i>Zfp41</i>         | chr15:75616678-75625300   | 3.0169    | 3.3639    | 0.1571  | 0.325491 |
| <i>Gm17606</i>       | chr14:54640951-54648293   | 46.5795   | 52.5031   | 0.1727  | 0.306163 |
| <i>Ppp2r2a</i>       | chr14:67014056-67072471   | 7.9292    | 8.6487    | 0.1253  | 0.345394 |
| <i>Tagap</i>         | chr17:7925999-7934897     | 40.4204   | 44.0690   | 0.1247  | 0.397086 |
| <i>Bak1</i>          | chr17:27019809-27029009   | 17.8468   | 17.0026   | -0.0699 | 0.410228 |
| <i>Taf11</i>         | chr17:27901121-27909242   | 5.8203    | 6.4520    | 0.1487  | 0.279120 |
| <i>Cd320</i>         | chr17:33843090-33849774   | 2.3771    | 2.1049    | -0.1755 | 0.348980 |
| <i>Nde1</i>          | chr16:14163274-14192928   | 21.4817   | 23.0254   | 0.1001  | 0.235102 |
| <i>Pcnp</i>          | chr16:56007244-56029739   | 17.0813   | 16.3891   | -0.0597 | 0.317577 |
| <i>Rfk</i>           | chr19:17394042-17401349   | 16.5851   | 15.4870   | -0.0988 | 0.483236 |
| <i>Smarca2</i>       | chr19:26605114-26778321   | 25.0177   | 26.7335   | 0.0957  | 0.265738 |
| <i>Avpi1</i>         | chr19:42123272-42129059   | 3.5245    | 4.1288    | 0.2283  | 0.327194 |
| <i>Farp2</i>         | chr1:93512078-93621976    | 1.3389    | 1.5572    | 0.2179  | 0.393036 |
| <i>Myef2</i>         | chr2:125084627-125123661  | 6.3964    | 6.8563    | 0.1002  | 0.136297 |
| <i>Cdc25b</i>        | chr2:131186948-131198497  | 16.8796   | 19.0555   | 0.1749  | 0.473394 |
| <i>Epb4.1l1</i>      | chr2:156420908-156543214  | 0.7473    | 0.6665    | -0.1650 | 0.438179 |
| <i>Gm20402</i>       | chr3:52268434-52269435    | 45.0508   | 40.2271   | -0.1634 | 0.551726 |
| <i>Zcchc7</i>        | chr4:44755876-44932215    | 17.7630   | 18.7548   | 0.0784  | 0.167718 |
| <i>Ccdc163</i>       | chr4:116708508-116751206  | 2.9784    | 3.3470    | 0.1683  | 0.152650 |
| <i>Sfn</i>           | chr4:133600555-133602168  | 14.4888   | 13.7037   | -0.0804 | 0.380723 |
| <i>Pex10</i>         | chr4:155067015-155072433  | 7.9712    | 7.5956    | -0.0696 | 0.246283 |
| <i>Fam213a</i>       | chr14:40993739-41013788   | 3.6763    | 3.3027    | -0.1546 | 0.442886 |
| <i>D3ErtD751e</i>    | chr3:41742610-41759389    | 4.6709    | 4.3971    | -0.0872 | 0.342273 |
| <i>9530068E07Rik</i> | chr11:52396427-52408728   | 19.5377   | 18.7898   | -0.0563 | 0.455613 |
| <i>Gm15446</i>       | chr5:109923399-109943936  | 5.2188    | 5.6545    | 0.1157  | 0.103642 |
| <i>Mtg2</i>          | chr2:180070587-180085902  | 8.0015    | 7.7334    | -0.0492 | 0.178796 |
| <i>Ociad1</i>        | chr5:73292793-73314077    | 40.9224   | 39.3878   | -0.0551 | 0.446972 |
| <i>Ikbbk</i>         | chr8:22659211-22706589    | 16.8320   | 17.7899   | 0.0799  | 0.179507 |
| <i>PsmA2</i>         | chr13:14613241-14625671   | 123.0261  | 115.0879  | -0.0962 | 0.512225 |
| <i>Rusc1</i>         | chr3:89083980-89093363    | 11.4272   | 10.8253   | -0.0781 | 0.497928 |
| <i>Prim2</i>         | chr1:33453810-33669786    | 8.7176    | 8.0634    | -0.1126 | 0.413645 |
| <i>Mrrf</i>          | chr2:36136388-36190647    | 5.0393    | 4.7054    | -0.0989 | 0.217259 |
| <i>Ntrk3</i>         | chr7:78192361-78578408    | 2.0015    | 1.8406    | -0.1209 | 0.349755 |
| <i>Gm16206</i>       | chr3:53452618-53457797    | 3.1162    | 2.7876    | -0.1608 | 0.359256 |
| <i>Adck4</i>         | chr7:27233022-27262252    | 6.8971    | 6.4538    | -0.0959 | 0.450158 |
| <i>Sorl1</i>         | chr9:41964719-42124297    | 13.3397   | 14.5634   | 0.1266  | 0.435429 |
| <i>Cep70</i>         | chr9:99243441-99300401    | 5.3594    | 5.8630    | 0.1296  | 0.137718 |
| <i>Med30</i>         | chr15:52712444-52730431   | 30.7135   | 29.0985   | -0.0779 | 0.316151 |
| <i>H2-Q4</i>         | chr17:35379616-35385290   | 140.9208  | 133.3560  | -0.0796 | 0.574413 |
| <i>Gm15674</i>       | chr1:130422823-130437914  | 8.0347    | 9.1657    | 0.1900  | 0.465279 |
| <i>Etfhd</i>         | chr3:79603787-79628863    | 6.5391    | 6.2505    | -0.0651 | 0.370334 |
| <i>Gm13091</i>       | chr4:150566868-150568544  | 19.0539   | 21.3594   | 0.1648  | 0.221668 |
| <i>Rplp1</i>         | chr9:61913283-61914538    | 2883.1594 | 2549.0283 | -0.1777 | 0.433664 |
| <i>Coq3</i>          | chr4:21879672-21912162    | 3.4263    | 3.8277    | 0.1598  | 0.281180 |
| <i>Ctdsp1</i>        | chr1:74391508-74397285    | 14.7650   | 14.0240   | -0.0743 | 0.521043 |
| <i>Slc35c1</i>       | chr2:92452763-92460538    | 12.0221   | 11.3671   | -0.0808 | 0.526567 |
| <i>Stk17b</i>        | chr1:53755505-53785224    | 268.2561  | 255.7319  | -0.0690 | 0.507493 |
| <i>6330418K02Rik</i> | chr5:138264042-138266661  | 5.5107    | 4.9617    | -0.1514 | 0.396701 |
| <i>Vav3</i>          | chr3:109340652-109685698  | 6.4025    | 6.1149    | -0.0663 | 0.411928 |
| <i>Papolg</i>        | chr11:23862645-23895253   | 20.6373   | 19.8889   | -0.0533 | 0.441020 |
| <i>Gm16234</i>       | chr10:14664219-14668318   | 14.9824   | 13.6759   | -0.1316 | 0.414874 |
| <i>Stx7</i>          | chr10:24149316-24188959   | 10.6223   | 11.5210   | 0.1172  | 0.252619 |
| <i>Chd3os</i>        | chr11:69340460-69342641   | 2.1513    | 2.4909    | 0.2114  | 0.185950 |
| <i>Arhgdia</i>       | chr11:120578103-120581624 | 79.6008   | 86.8978   | 0.1265  | 0.388573 |
| <i>Hist1h4i</i>      | chr13:22040815-22041352   | 8.2200    | 7.1359    | -0.2041 | 0.317454 |
| <i>Adam22</i>        | chr5:8072351-8368160      | 0.4584    | 0.5275    | 0.2025  | 0.300989 |
| <i>Trim56</i>        | chr5:137105643-137116209  | 38.7188   | 41.3313   | 0.0942  | 0.310287 |
| <i>Rnf169</i>        | chr7:99920256-99980458    | 13.4180   | 12.9560   | -0.0505 | 0.446463 |
| <i>AB124611</i>      | chr9:21526175-21545333    | 42.4879   | 40.6661   | -0.0632 | 0.408979 |
| <i>Tpr</i>           | chr1:150392837-150449935  | 81.0122   | 85.2828   | 0.0741  | 0.163226 |
| <i>Sdhd</i>          | chr4:140961202-140979193  | 40.9500   | 38.5096   | -0.0886 | 0.508092 |
| <i>Bcr</i>           | chr10:75060895-75184923   | 5.3299    | 5.0641    | -0.0738 | 0.467836 |
| <i>Gm26890</i>       | chr7:19597292-19602294    | 2.0804    | 2.3695    | 0.1877  | 0.234665 |
| <i>D2Wsu81e</i>      | chr2:30173446-30178459    | 10.1871   | 9.6948    | -0.0715 | 0.337552 |
| <i>Rps19</i>         | chr7:24884370-24889806    | 74.8607   | 69.9020   | -0.0989 | 0.544990 |
| <i>Ebpl</i>          | chr14:61339762-61360445   | 5.7153    | 5.2824    | -0.1136 | 0.315030 |
| <i>Angel2</i>        | chr1:190925111-190946962  | 23.3046   | 24.5581   | 0.0756  | 0.102694 |
| <i>Greb1l</i>        | chr18:10325176-10562934   | 1.0738    | 1.2020    | 0.1627  | 0.336141 |
| <i>Klf20a</i>        | chr18:34624623-34633265   | 6.6778    | 7.3211    | 0.1327  | 0.361188 |

|                      |                           |          |          |         |          |
|----------------------|---------------------------|----------|----------|---------|----------|
| <i>Akt1s1</i>        | chr7:44848990-44855421    | 9.9808   | 9.4383   | -0.0806 | 0.484005 |
| <i>Tbccd1</i>        | chr16:22813214-22857569   | 7.4672   | 7.0237   | -0.0883 | 0.379944 |
| <i>Elof1</i>         | chr9:22112988-22117148    | 23.4461  | 21.8634  | -0.1008 | 0.442005 |
| <i>Xpnpep3</i>       | chr15:81400137-81456807   | 3.5447   | 3.8509   | 0.1196  | 0.148286 |
| <i>Fam204a</i>       | chr19:60198585-60226697   | 12.6666  | 13.6305  | 0.1058  | 0.082135 |
| <i>Ccn1</i>          | chr3:65946150-65958249    | 69.5372  | 67.8371  | -0.0357 | 0.422009 |
| <i>Uba52</i>         | chr8:70508262-70510801    | 6.0751   | 5.6036   | -0.1166 | 0.230902 |
| <i>Cnih4</i>         | chr1:181150930-181168994  | 5.8720   | 6.3788   | 0.1194  | 0.211647 |
| <i>Akr1c13</i>       | chr13:4191183-4205596     | 11.9743  | 10.7971  | -0.1493 | 0.514391 |
| <i>Naa20</i>         | chr2:145902098-145916425  | 8.9798   | 9.6517   | 0.1041  | 0.199716 |
| <i>Zfp592</i>        | chr7:80993680-81045164    | 23.2517  | 24.9829  | 0.1036  | 0.342609 |
| <i>Gm25082</i>       | chr11:51270434-51270689   | 36.3421  | 33.3661  | -0.1233 | 0.338697 |
| <i>Ints2</i>         | chr11:86210680-86257575   | 5.7176   | 5.4501   | -0.0691 | 0.483919 |
| <i>2700097009Rik</i> | chr12:55045660-55080110   | 2.3749   | 2.6479   | 0.1570  | 0.276922 |
| <i>Trpt1</i>         | chr19:6996130-6999044     | 6.0277   | 6.7690   | 0.1673  | 0.143536 |
| <i>Tbcd12</i>        | chr19:38836578-38919923   | 1.7111   | 1.9323   | 0.1754  | 0.284614 |
| <i>Map3k8</i>        | chr18:4331326-4353015     | 3.0518   | 3.4838   | 0.1910  | 0.446489 |
| <i>Stk35</i>         | chr2:129800516-129832287  | 2.1982   | 2.4970   | 0.1839  | 0.399692 |
| <i>Pole3</i>         | chr4:62522648-62525068    | 8.8988   | 8.2279   | -0.1131 | 0.426531 |
| <i>Add3</i>          | chr19:53140444-53247399   | 158.4370 | 154.4912 | -0.0364 | 0.413073 |
| <i>Phykpl</i>        | chrX:151584756-151604489  | 21.4331  | 22.6422  | 0.0792  | 0.159024 |
| <i>Yy2</i>           | chrX:157565946-157598650  | 4.0233   | 4.4014   | 0.1296  | 0.155684 |
| <i>Mut</i>           | chr17:40934684-40961989   | 14.0738  | 13.4749  | -0.0627 | 0.409676 |
| <i>Slc30a6</i>       | chr17:74395607-74424229   | 7.8400   | 7.3863   | -0.0860 | 0.213610 |
| <i>Ccdc69</i>        | chr11:55049730-55078131   | 17.2178  | 16.3010  | -0.0789 | 0.410422 |
| <i>Pten</i>          | chr19:32757496-32826160   | 21.2985  | 20.5650  | -0.0506 | 0.469515 |
| <i>Skil</i>          | chr3:31095057-31122577    | 28.9569  | 30.5582  | 0.0777  | 0.208125 |
| <i>Pdap1</i>         | chr5:145128768-145140238  | 20.7771  | 20.0255  | -0.0532 | 0.345560 |
| <i>Gatad2a</i>       | chr8:69907068-69996379    | 18.8111  | 20.3083  | 0.1105  | 0.349203 |
| <i>Zdhhc15</i>       | chrX:104536968-104671064  | 12.8245  | 12.1861  | -0.0737 | 0.504727 |
| <i>Atp5o</i>         | chr16:91684397-91931687   | 41.0145  | 38.6223  | -0.0867 | 0.505321 |
| <i>Srgap2</i>        | chr1:131285250-131527361  | 6.2789   | 6.8044   | 0.1160  | 0.305686 |
| <i>Fuca1</i>         | chr4:135920734-135940311  | 11.2410  | 12.0472  | 0.0999  | 0.159459 |
| <i>Tmem50a</i>       | chr4:134897848-134915024  | 128.3307 | 123.7023 | -0.0530 | 0.455385 |
| <i>Armc6</i>         | chr8:70220171-70234466    | 3.5754   | 3.3097   | -0.1114 | 0.400588 |
| <i>Ramp3</i>         | chr11:6658520-6677475     | 3.1363   | 2.7610   | -0.1839 | 0.304644 |
| <i>Top2a</i>         | chr11:98992942-99024189   | 7.6872   | 9.8915   | 0.3637  | 0.395576 |
| <i>Mrpl1</i>         | chr5:96209492-96266727    | 5.8704   | 6.4114   | 0.1272  | 0.307199 |
| <i>Foxp1</i>         | chr6:98925337-99522721    | 32.8233  | 35.0608  | 0.0951  | 0.323816 |
| <i>Zfp940</i>        | chr7:29833619-29853669    | 3.1877   | 2.9678   | -0.1031 | 0.446763 |
| <i>Traj17</i>        | chr14:54201774-54201837   | 60.5212  | 72.0602  | 0.2518  | 0.347796 |
| <i>Dapp1</i>         | chr3:137931006-137981545  | 14.9256  | 16.0900  | 0.1084  | 0.307333 |
| <i>Vapa</i>          | chr17:65580055-65613555   | 73.9399  | 70.1533  | -0.0758 | 0.484232 |
| <i>Atox1</i>         | chr11:55446640-55461239   | 42.7773  | 39.7897  | -0.1044 | 0.462534 |
| <i>Tango6</i>        | chr8:106683067-106851439  | 4.2284   | 4.7426   | 0.1656  | 0.407619 |
| <i>Arl3</i>          | chr19:46531108-46573085   | 5.7140   | 5.0787   | -0.1700 | 0.271262 |
| <i>Slc25a11</i>      | chr11:70644195-70647479   | 47.1418  | 45.6952  | -0.0450 | 0.342788 |
| <i>Lap3</i>          | chr5:45493373-45512674    | 6.1085   | 5.6752   | -0.1062 | 0.420535 |
| <i>Kif22</i>         | chr7:127027731-127042420  | 5.8876   | 6.6410   | 0.1737  | 0.406041 |
| <i>Elp3</i>          | chr14:65530445-65593112   | 25.8181  | 25.0620  | -0.0429 | 0.319549 |
| <i>Tmem39a</i>       | chr16:38558697-38592162   | 6.2984   | 6.0287   | -0.0631 | 0.105772 |
| <i>Acads</i>         | chr5:115110298-115119346  | 12.0067  | 11.3821  | -0.0771 | 0.443409 |
| <i>Rnf114</i>        | chr2:167492644-167516173  | 72.4144  | 70.4697  | -0.0393 | 0.463031 |
| <i>Paip1</i>         | chr13:119428600-119458218 | 22.4732  | 21.3829  | -0.0718 | 0.479007 |
| <i>Tmem206</i>       | chr1:191325911-191350914  | 7.1228   | 7.9234   | 0.1537  | 0.311438 |
| <i>Sgpl1</i>         | chr10:61098641-61147703   | 18.3954  | 19.5735  | 0.0896  | 0.260806 |
| <i>Klhl11</i>        | chr11:100462613-100472741 | 16.2608  | 15.5627  | -0.0633 | 0.326033 |
| <i>Mcur1</i>         | chr13:43538411-43560191   | 8.5958   | 9.2313   | 0.1029  | 0.162036 |
| <i>Zfp668</i>        | chr7:127865169-127876828  | 8.4653   | 8.0974   | -0.0641 | 0.413730 |
| <i>Smdt1</i>         | chr15:82338958-82349091   | 37.9432  | 35.4451  | -0.0983 | 0.501078 |
| <i>Ndfip2</i>        | chr14:105258572-105309298 | 4.9218   | 4.7673   | -0.0460 | 0.246266 |
| <i>Fam160b1</i>      | chr19:57361008-57389594   | 24.3846  | 23.6268  | -0.0455 | 0.485189 |
| <i>Ythdc2</i>        | chr18:44828664-44889720   | 10.0728  | 10.7447  | 0.0932  | 0.230731 |
| <i>BC031181</i>      | chr18:75005899-75009933   | 35.0016  | 32.9826  | -0.0857 | 0.454575 |
| <i>Serinc3</i>       | chr2:163623271-163645131  | 80.4713  | 86.4345  | 0.1031  | 0.369857 |
| <i>Gstk1</i>         | chr6:42245934-42250441    | 5.9786   | 6.8987   | 0.2065  | 0.332343 |
| <i>Mfn2</i>          | chr4:147873598-147904704  | 9.2761   | 10.0258  | 0.1121  | 0.271518 |
| <i>Pdha1</i>         | chrX:160122208-160138413  | 57.1685  | 55.1397  | -0.0521 | 0.451046 |
| <i>Ccdc28a</i>       | chr10:18213675-18234998   | 8.0450   | 7.6200   | -0.0783 | 0.353583 |
| <i>Appbp2</i>        | chr11:85187261-85235130   | 14.4386  | 15.5835  | 0.1101  | 0.327307 |
| <i>Tmco3</i>         | chr8:13288012-13322924    | 3.7627   | 3.5243   | -0.0945 | 0.386080 |

|                      |                           |          |          |         |          |
|----------------------|---------------------------|----------|----------|---------|----------|
| <i>Sumf2</i>         | chr5:129846989-129864050  | 7.5701   | 7.1701   | -0.0783 | 0.279994 |
| <i>Chchd3</i>        | chr6:32790975-33060260    | 33.3291  | 31.3072  | -0.0903 | 0.519981 |
| <i>Cbx5</i>          | chr15:103191543-103239816 | 14.9991  | 15.8843  | 0.0827  | 0.193951 |
| <i>Csnk2a1</i>       | chr2:152226838-152281852  | 22.7928  | 22.0641  | -0.0469 | 0.421706 |
| <i>Fam214a</i>       | chr9:74953052-75032468    | 14.0733  | 14.9155  | 0.0838  | 0.131845 |
| <i>Smyd2</i>         | chr1:189880491-189922363  | 3.7543   | 3.4569   | -0.1190 | 0.330399 |
| <i>Miip</i>          | chr4:147860777-147868816  | 25.4419  | 24.6003  | -0.0485 | 0.483855 |
| <i>A930024E05Rik</i> | chr5:122989353-122998345  | 12.4539  | 11.7922  | -0.0788 | 0.422822 |
| <i>Akap10</i>        | chr11:61871306-61930252   | 14.6188  | 15.4184  | 0.0768  | 0.063859 |
| <i>Gabbr1</i>        | chr17:37045965-37075067   | 4.0278   | 4.3484   | 0.1105  | 0.248112 |
| <i>Gm22422</i>       | chr16:56035752-56035887   | 61.8154  | 85.9287  | 0.4752  | 0.422937 |
| <i>Hif1an</i>        | chr19:44562849-44576274   | 11.0367  | 11.8793  | 0.1061  | 0.335731 |
| <i>AV039307</i>      | chr2:120850704-120866689  | 5.8322   | 6.5826   | 0.1746  | 0.285863 |
| <i>Tmem38b</i>       | chr4:53826044-53862019    | 1.0850   | 1.2960   | 0.2565  | 0.407749 |
| <i>Ttc27</i>         | chr17:74717749-74863570   | 19.5015  | 18.5419  | -0.0728 | 0.456504 |
| <i>Mospd1</i>        | chrX:53344597-53370502    | 6.2590   | 5.7856   | -0.1135 | 0.373246 |
| <i>Pkn2</i>          | chr3:142790901-142882004  | 29.6230  | 28.5541  | -0.0530 | 0.492652 |
| <i>Spn</i>           | chr7:127132231-127137823  | 252.4145 | 242.3830 | -0.0585 | 0.570544 |
| <i>Ly6a</i>          | chr15:74994877-74997634   | 151.1321 | 184.2840 | 0.2861  | 0.368435 |
| <i>Gm10524</i>       | chr18:82692948-82706174   | 2.8309   | 3.1978   | 0.1758  | 0.097496 |
| <i>NA</i>            | chr7:29155679-29156918    | 3.6207   | 3.1653   | -0.1939 | 0.381442 |
| <i>Gatc</i>          | chr5:115333241-115341178  | 11.7486  | 12.7031  | 0.1127  | 0.108667 |
| <i>Dhx57</i>         | chr17:80238303-80290476   | 18.2782  | 19.3639  | 0.0832  | 0.186231 |
| <i>Bcl2l1</i>        | chr2:152780667-152831728  | 3.2114   | 3.5755   | 0.1549  | 0.313367 |
| <i>Zmym3</i>         | chrX:101404383-101420849  | 6.0026   | 6.4722   | 0.1087  | 0.325933 |
| <i>Dhrs11</i>        | chr11:84820855-84828994   | 4.9371   | 4.4206   | -0.1594 | 0.454102 |
| <i>Gm11537</i>       | chr11:96766801-96768269   | 10.4522  | 9.6007   | -0.1226 | 0.360363 |
| <i>Trp53bp2</i>      | chr1:182409171-182462432  | 8.4118   | 8.0258   | -0.0678 | 0.481657 |
| <i>Phyh1</i>         | chr2:30266202-30301080    | 5.0125   | 5.4919   | 0.1318  | 0.198134 |
| <i>Ppie</i>          | chr4:123127114-123139951  | 21.5114  | 20.4193  | -0.0752 | 0.428441 |
| <i>Rfx3</i>          | chr19:27761720-28011166   | 5.1148   | 5.5508   | 0.1180  | 0.333579 |
| <i>Unc119b</i>       | chr5:115122549-115134975  | 12.7494  | 12.3146  | -0.0501 | 0.394283 |
| <i>Nudt7</i>         | chr8:114133556-114152312  | 3.8780   | 4.2513   | 0.1326  | 0.163381 |
| <i>Camta1</i>        | chr4:150917321-151861876  | 0.8323   | 0.7728   | -0.1070 | 0.243018 |
| <i>Grb2</i>          | chr11:115644044-115708597 | 14.7454  | 16.0774  | 0.1248  | 0.353422 |
| <i>Ints1</i>         | chr5:139751281-139775678  | 19.1545  | 18.3147  | -0.0647 | 0.566020 |
| <i>Gm26836</i>       | chr11:75745071-75761195   | 5.3645   | 6.0733   | 0.1790  | 0.382454 |
| <i>Aim1</i>          | chr10:43950306-44004846   | 27.8819  | 29.3559  | 0.0743  | 0.174766 |
| <i>Pak2</i>          | chr16:32016289-32079342   | 45.3881  | 48.0085  | 0.0810  | 0.210499 |
| <i>Exosc2</i>        | chr2:31670714-31681350    | 19.3827  | 18.6240  | -0.0576 | 0.277363 |
| <i>Urod</i>          | chr4:116989964-116994413  | 13.7526  | 13.1047  | -0.0696 | 0.411897 |
| <i>Sf3a1</i>         | chr11:4160349-4182541     | 15.1385  | 16.1107  | 0.0898  | 0.211449 |
| <i>Dhx40</i>         | chr11:86768845-86807696   | 23.6220  | 25.7208  | 0.1228  | 0.417535 |
| <i>Zfp141</i>        | chr7:42473385-42505726    | 12.0002  | 11.4579  | -0.0667 | 0.444156 |
| <i>Arrb1</i>         | chr7:99535465-99606771    | 14.6320  | 14.2279  | -0.0404 | 0.476203 |
| <i>Arv1</i>          | chr8:124722138-124734123  | 13.8536  | 15.0239  | 0.1170  | 0.074489 |
| <i>St3gal4</i>       | chr9:35046578-35116810    | 13.2674  | 14.2296  | 0.1010  | 0.066595 |
| <i>Tjcp2</i>         | chr15:100502798-100552008 | 5.2672   | 4.8358   | -0.1233 | 0.501390 |
| <i>Rbm4b</i>         | chr19:4756542-4767065     | 13.5182  | 14.3810  | 0.0893  | 0.266570 |
| <i>Dut</i>           | chr2:125247189-125258608  | 10.9048  | 10.2724  | -0.0862 | 0.401436 |
| <i>Cisn</i>          | chr4:126556934-126593903  | 0.6219   | 0.7516   | 0.2732  | 0.496667 |
| <i>Ninj1</i>         | chr13:49187484-49196244   | 4.6368   | 4.2612   | -0.1219 | 0.083536 |
| <i>Fam149b</i>       | chr14:20348161-20383489   | 16.5494  | 17.6355  | 0.0917  | 0.177194 |
| <i>Selt</i>          | chr3:58576635-58593133    | 29.7120  | 32.1334  | 0.1130  | 0.388174 |
| <i>Dstn</i>          | chr2:143915319-143943324  | 6.5809   | 7.3213   | 0.1538  | 0.368843 |
| <i>Ptar1</i>         | chr19:23687399-23721129   | 15.5850  | 14.8529  | -0.0694 | 0.386825 |
| <i>Zscan26</i>       | chr13:21442174-21453730   | 51.8074  | 49.9498  | -0.0527 | 0.497514 |
| <i>Topors</i>        | chr4:40259600-40269850    | 28.3680  | 27.5941  | -0.0399 | 0.387477 |
| <i>Bend5</i>         | chr4:111415005-111460298  | 2.3322   | 2.0605   | -0.1786 | 0.437476 |
| <i>Zc3h4</i>         | chr7:16401195-16437694    | 18.4150  | 19.8293  | 0.1068  | 0.358832 |
| <i>Kdelr1</i>        | chr7:45872771-45883731    | 20.3406  | 19.4051  | -0.0679 | 0.447600 |
| <i>Kdm3a</i>         | chr6:71588973-71632905    | 40.7202  | 39.5012  | -0.0438 | 0.501466 |
| <i>Ankrd13a</i>      | chr5:114774676-114806200  | 67.3442  | 65.3245  | -0.0439 | 0.456303 |
| <i>Isy1</i>          | chr6:87818446-87838759    | 44.7234  | 42.3522  | -0.0786 | 0.490522 |
| <i>Egr3</i>          | chr14:70077444-70080157   | 2.6174   | 3.1000   | 0.2442  | 0.297984 |
| <i>Gm16059</i>       | chr15:79427219-79431629   | 1.3644   | 1.6019   | 0.2315  | 0.358756 |
| <i>Gm11775</i>       | chr11:121029401-121052357 | 7.4596   | 8.7147   | 0.2244  | 0.393862 |
| <i>Fgfr10p</i>       | chr17:8165500-8196804     | 9.4165   | 10.0190  | 0.0895  | 0.048712 |
| <i>Cnppd1</i>        | chr1:75134553-75142368    | 40.0210  | 38.9708  | -0.0384 | 0.495516 |
| <i>Klhdc2</i>        | chr12:69296680-69310687   | 21.8004  | 20.9631  | -0.0565 | 0.531096 |
| <i>Rbm18</i>         | chr2:36116078-36136773    | 7.9403   | 8.4919   | 0.0969  | 0.202775 |

|               |                           |          |          |         |          |
|---------------|---------------------------|----------|----------|---------|----------|
| Gm6630        | chr16:23179555-23180011   | 9.4833   | 8.4358   | -0.1689 | 0.319282 |
| Chpf2         | chr5:24586740-24594395    | 17.9143  | 17.0749  | -0.0692 | 0.566459 |
| Doc2g         | chr19:4003320-4007005     | 2.2159   | 2.0007   | -0.1474 | 0.398108 |
| Lgals4        | chr7:28833974-28841703    | 4.5805   | 4.2059   | -0.1231 | 0.410438 |
| Dck           | chr5:88764995-88783281    | 18.5829  | 20.1945  | 0.1200  | 0.394212 |
| Fbxl22        | chr9:66508458-66514593    | 5.1408   | 5.6525   | 0.1369  | 0.308190 |
| Glyctk        | chr9:106152856-106158138  | 4.9479   | 4.6668   | -0.0844 | 0.416246 |
| Pdss1         | chr2:22895521-22940266    | 4.2278   | 4.6376   | 0.1335  | 0.319574 |
| Tmem41a       | chr16:21934326-21947552   | 4.3233   | 3.8819   | -0.1554 | 0.301820 |
| Ppp6c         | chr2:39194353-39226451    | 19.5813  | 20.6937  | 0.0797  | 0.090263 |
| Ddx42         | chr11:106216925-106249139 | 51.7418  | 54.4416  | 0.0734  | 0.137613 |
| Gm16039       | chr6:8259287-8597480      | 5.6911   | 6.0715   | 0.0933  | 0.240483 |
| Dnhd1         | chr7:105640561-105721799  | 2.2214   | 2.1019   | -0.0798 | 0.477110 |
| Klf2          | chr8:72319032-72321656    | 130.5883 | 142.9883 | 0.1309  | 0.461891 |
| Mrpl3         | chr9:105053238-105077466  | 14.8263  | 14.1542  | -0.0669 | 0.445067 |
| Nsmce2        | chr15:59374197-59601683   | 5.2850   | 4.9853   | -0.0842 | 0.279552 |
| Mss51         | chr14:20482863-20496901   | 4.3652   | 4.9348   | 0.1770  | 0.332872 |
| Plcl2         | chr17:50509546-50688493   | 60.5899  | 59.5640  | -0.0246 | 0.350766 |
| Vti1a         | chr19:55316350-55626561   | 11.5293  | 12.4948  | 0.1160  | 0.349505 |
| Hars2         | chr18:36783007-36792562   | 12.8289  | 12.2697  | -0.0643 | 0.451371 |
| Tsyp13        | chr2:153222379-153225441  | 6.8669   | 7.4356   | 0.1148  | 0.193267 |
| Fam129c       | chr8:71597647-71607936    | 1.5703   | 1.4149   | -0.1504 | 0.379554 |
| Plin3         | chr17:56278961-56290511   | 19.6539  | 18.7135  | -0.0707 | 0.476475 |
| Trbv12-2      | chr6:41118863-41119364    | 43.6307  | 47.7298  | 0.1295  | 0.266620 |
| Pcf11         | chr7:92643711-92669933    | 48.4497  | 47.5073  | -0.0283 | 0.394374 |
| Galnt7        | chr8:57523827-57653032    | 13.8359  | 14.7064  | 0.0880  | 0.191445 |
| Gm20496       | chr17:34199315-34205449   | 178.6893 | 171.6202 | -0.0582 | 0.508322 |
| Tmbim6        | chr15:99392881-99410049   | 104.3008 | 102.3187 | -0.0277 | 0.444214 |
| Slc25a23      | chr17:57043710-57059863   | 1.7310   | 2.0114   | 0.2166  | 0.437909 |
| Pycard        | chr7:127992102-127993867  | 71.8749  | 68.4960  | -0.0695 | 0.503825 |
| Mif4gd        | chr11:115607917-115612969 | 27.9151  | 27.0046  | -0.0478 | 0.390717 |
| Chmp6         | chr11:119913440-119919548 | 14.3071  | 13.7668  | -0.0555 | 0.117635 |
| Myo1h         | chr5:114314940-114364576  | 8.8670   | 9.5191   | 0.1024  | 0.296609 |
| Atg4b         | chr1:93751499-93789434    | 10.5704  | 10.1926  | -0.0525 | 0.496594 |
| Gclm          | chr3:122245556-122269984  | 3.4519   | 3.7762   | 0.1295  | 0.297611 |
| A430005L14Rik | chr4:153957236-153961925  | 11.5329  | 10.8784  | -0.0843 | 0.294680 |
| Gltscr1l      | chr17:46798115-46831413   | 7.3168   | 7.9347   | 0.1170  | 0.373645 |
| B230322F03Rik | chr7:35555366-35556935    | 3.4425   | 3.1191   | -0.1423 | 0.148398 |
| Rbm7          | chr9:48488708-48495330    | 55.8016  | 53.3754  | -0.0641 | 0.485237 |
| Traf3ip3      | chr1:193175505-193201703  | 119.8810 | 117.4362 | -0.0297 | 0.442596 |
| Tbc1d20       | chr2:152293827-152313996  | 25.2896  | 24.6426  | -0.0374 | 0.396678 |
| Hdgfrp3       | chr7:81881250-81934473    | 7.3494   | 6.9367   | -0.0834 | 0.554939 |
| Pak1          | chr7:97842934-97912381    | 4.0127   | 3.6396   | -0.1408 | 0.476281 |
| Dedd          | chr1:171329144-171342331  | 7.2642   | 7.7532   | 0.0940  | 0.144196 |
| Tmem50b       | chr16:91574502-91597800   | 12.9359  | 12.4185  | -0.0589 | 0.331400 |
| Ttc19         | chr11:62281472-62328451   | 7.5461   | 7.2532   | -0.0571 | 0.340229 |
| Heatr6        | chr11:83753695-83783754   | 9.8505   | 9.5322   | -0.0474 | 0.398276 |
| Traj18        | chr14:54200776-54200842   | 67.4604  | 78.2212  | 0.2135  | 0.319814 |
| Ppp2r1a       | chr17:20945310-20965916   | 47.8520  | 46.7586  | -0.0333 | 0.409058 |
| Zfp691        | chr4:119169512-119174195  | 2.0281   | 2.3278   | 0.1988  | 0.295663 |
| Tecpr2        | chr12:110889263-110972394 | 3.5418   | 3.3692   | -0.0721 | 0.467039 |
| Dbnl          | chr11:5788487-5800962     | 84.8526  | 81.6355  | -0.0558 | 0.542819 |
| Smn1          | chr13:100124851-100137690 | 4.2482   | 4.7051   | 0.1474  | 0.219008 |
| Ccsap         | chr8:123840830-123860209  | 5.4922   | 6.0665   | 0.1435  | 0.300341 |
| Gm11632       | chr11:98084456-98085424   | 12.4528  | 13.8358  | 0.1519  | 0.170537 |
| Magee1        | chrX:105120395-105123909  | 1.9925   | 2.2688   | 0.1873  | 0.352051 |
| Dusp6         | chr10:99263230-99267488   | 15.6276  | 14.5702  | -0.1011 | 0.530170 |
| Sod2          | chr17:13007838-13018119   | 13.2735  | 12.6685  | -0.0673 | 0.441697 |
| 4930402H24Rik | chr2:130706199-130906406  | 3.9322   | 3.7894   | -0.0534 | 0.340976 |
| Helb          | chr10:120083607-120112987 | 18.3953  | 19.4051  | 0.0771  | 0.120762 |
| Ech1          | chr7:28825216-28832247    | 29.0880  | 27.7287  | -0.0690 | 0.511207 |
| 4632433K11Rik | chr7:5034117-5035246      | 5.1491   | 5.7897   | 0.1692  | 0.140530 |
| Tec           | chr5:72755717-72868483    | 11.4362  | 10.9471  | -0.0631 | 0.403256 |
| Pcid2         | chr8:13077188-13105459    | 14.1997  | 13.6904  | -0.0527 | 0.402442 |
| Dpp8          | chr9:65032457-65082650    | 44.8030  | 43.8049  | -0.0325 | 0.433288 |
| Ncoa2         | chr1:13139104-13374083    | 18.1076  | 19.1960  | 0.0842  | 0.274714 |
| 1810062O18Rik | chr14:20546078-20570687   | 3.3081   | 2.9555   | -0.1626 | 0.359441 |
| Chd3          | chr11:69343272-69369406   | 125.8093 | 119.5795 | -0.0733 | 0.586936 |
| Eapp          | chr12:54670339-54695897   | 10.3847  | 11.2803  | 0.1194  | 0.378552 |
| Nlrc3         | chr16:3945006-3976632     | 17.9829  | 19.3798  | 0.1079  | 0.383807 |
| Gm12250       | chr11:58183842-58190198   | 42.5250  | 47.1765  | 0.1498  | 0.491940 |

|                      |                           |          |          |         |          |
|----------------------|---------------------------|----------|----------|---------|----------|
| <i>Dennd1b</i>       | chr1:138963435-139176043  | 15.9690  | 15.6447  | -0.0296 | 0.330014 |
| <i>Marf1</i>         | chr16:14109165-14159274   | 27.1316  | 28.4840  | 0.0702  | 0.110008 |
| <i>Fam219b</i>       | chr9:57537527-57543187    | 16.8957  | 16.2351  | -0.0575 | 0.449917 |
| <i>Ubr5</i>          | chr15:37967327-38078853   | 36.1725  | 38.2615  | 0.0810  | 0.275847 |
| <i>Tpd52l2</i>       | chr2:181497164-181517966  | 11.7999  | 11.4369  | -0.0451 | 0.245913 |
| <i>Slc6a20b</i>      | chr9:123593819-123632565  | 0.7281   | 0.8434   | 0.2121  | 0.213303 |
| <i>Aff3</i>          | chr1:38177325-38664955    | 19.4770  | 21.0982  | 0.1153  | 0.431670 |
| <i>Ftl1</i>          | chr7:45457943-45459884    | 80.9178  | 75.8809  | -0.0927 | 0.538535 |
| <i>Plekhb2</i>       | chr1:34849975-34879580    | 6.8284   | 7.3572   | 0.1076  | 0.341833 |
| <i>Gigyf2</i>        | chr1:87326997-87450796    | 14.4034  | 14.0385  | -0.0370 | 0.470810 |
| <i>NA</i>            | chr11:58327720-58330339   | 13.5178  | 12.7346  | -0.0861 | 0.502116 |
| <i>Cpsf7</i>         | chr19:10525243-10547735   | 30.6638  | 32.4131  | 0.0800  | 0.194817 |
| <i>Hist1h4b</i>      | chr13:23756936-23757427   | 19.2512  | 16.7374  | -0.2019 | 0.536396 |
| <i>Gm15672</i>       | chr5:139147575-139150693  | 4.1287   | 3.7146   | -0.1525 | 0.436909 |
| <i>Arhgap39</i>      | chr15:76723984-76818170   | 3.9432   | 4.3168   | 0.1306  | 0.375717 |
| <i>Map3k4</i>        | chr17:12227620-12318660   | 17.1262  | 16.7111  | -0.0354 | 0.285613 |
| <i>Cnot11</i>        | chr1:39534991-39546881    | 16.8976  | 16.2453  | -0.0568 | 0.481072 |
| <i>Rbm17</i>         | chr2:11585438-11604153    | 39.6330  | 38.0923  | -0.0572 | 0.467796 |
| <i>Pold2</i>         | chr11:5872179-5878292     | 19.1479  | 18.0079  | -0.0886 | 0.515460 |
| <i>Ppp4r1</i>        | chr17:65782572-65841926   | 12.4885  | 13.2908  | 0.0898  | 0.201312 |
| <i>Klhdc10</i>       | chr6:30401867-30455179    | 5.7307   | 5.5159   | -0.0551 | 0.455164 |
| <i>Slc17a5</i>       | chr9:78536487-78588041    | 4.3005   | 4.7389   | 0.1400  | 0.331707 |
| <i>Supt4a</i>        | chr11:87737551-87743623   | 49.2975  | 45.9696  | -0.1008 | 0.514927 |
| <i>Rpl23</i>         | chr11:97777526-97782437   | 165.3555 | 147.0733 | -0.1690 | 0.406970 |
| <i>Clip1</i>         | chr5:123577794-123684618  | 30.9690  | 30.2791  | -0.0325 | 0.422168 |
| <i>Ptpn9</i>         | chr9:56994967-57062805    | 5.4458   | 5.1920   | -0.0689 | 0.319048 |
| <i>Yipf3</i>         | chr17:46248079-46252537   | 26.7423  | 25.8017  | -0.0517 | 0.508360 |
| <i>Lrrprc</i>        | chr17:84705246-84790789   | 17.2760  | 16.7991  | -0.0404 | 0.464732 |
| <i>Ube2v2</i>        | chr16:15552676-15594524   | 3.1134   | 3.4303   | 0.1398  | 0.294885 |
| <i>Dsel</i>          | chr1:111858701-111864909  | 1.6281   | 1.8134   | 0.1555  | 0.335156 |
| <i>Orc4</i>          | chr2:48902823-48950277    | 11.2191  | 11.8977  | 0.0847  | 0.215185 |
| <i>Mfsd8</i>         | chr3:40818069-40846885    | 5.2394   | 5.6740   | 0.1150  | 0.122468 |
| <i>Fam132b</i>       | chr1:91366429-91374216    | 2.6853   | 2.4217   | -0.1490 | 0.467540 |
| <i>Adat2</i>         | chr10:13552893-13563376   | 3.6117   | 4.1403   | 0.1971  | 0.333414 |
| <i>Dock2</i>         | chr11:34226814-34783892   | 121.3418 | 128.8565 | 0.0867  | 0.358272 |
| <i>Gm12258</i>       | chr11:58847157-58861956   | 14.2224  | 13.4872  | -0.0766 | 0.530370 |
| <i>Amz2</i>          | chr11:109425945-109452813 | 10.3589  | 9.9746   | -0.0545 | 0.408760 |
| <i>Hectd1</i>        | chr12:51743721-51829536   | 90.4903  | 88.4788  | -0.0324 | 0.498940 |
| <i>Nfxl1</i>         | chr5:72513300-72559684    | 2.0258   | 2.2750   | 0.1674  | 0.327337 |
| <i>Shkbp1</i>        | chr7:27342132-27356019    | 10.1425  | 9.8042   | -0.0489 | 0.181038 |
| <i>Sertad1</i>       | chr7:27486909-27490316    | 28.3524  | 26.6424  | -0.0897 | 0.539204 |
| <i>Rpl18</i>         | chr7:45715456-45720835    | 56.3242  | 52.6762  | -0.0966 | 0.570177 |
| <i>Nap114</i>        | chr7:143513578-143549090  | 107.0890 | 103.8889 | -0.0438 | 0.460713 |
| <i>1700017B05Rik</i> | chr9:57252321-57262599    | 9.9887   | 9.4345   | -0.0824 | 0.580816 |
| <i>Hsd17b10</i>      | chrX:152001844-152004442  | 32.9177  | 30.8161  | -0.0952 | 0.523132 |
| <i>1810014B01Rik</i> | chr10:86685600-86694806   | 30.9135  | 32.9968  | 0.0941  | 0.179119 |
| <i>Tmem11</i>        | chr11:60864451-60879272   | 13.5619  | 12.8147  | -0.0818 | 0.429131 |
| <i>Fam160a2</i>      | chr7:105371210-105400054  | 3.4266   | 3.7300   | 0.1224  | 0.375470 |
| <i>5730405O15Rik</i> | chrX:13042014-13045297    | 4.2698   | 3.8815   | -0.1375 | 0.417309 |
| <i>Pgk1</i>          | chrX:106187099-106203699  | 2.6413   | 2.9683   | 0.1684  | 0.227320 |
| <i>Myc</i>           | chr15:61985390-61990374   | 16.9541  | 18.8196  | 0.1506  | 0.461532 |
| <i>Trappc8</i>       | chr18:20817223-20896078   | 37.8517  | 36.5886  | -0.0490 | 0.506939 |
| <i>Suv39h2</i>       | chr2:3455814-3475031      | 2.1902   | 2.0338   | -0.1069 | 0.279878 |
| <i>Sec61a2</i>       | chr2:5870986-5895432      | 3.8922   | 4.2742   | 0.1350  | 0.291389 |
| <i>Txnip</i>         | chr3:96557956-96561883    | 311.7185 | 333.8119 | 0.0988  | 0.384704 |
| <i>Itga7</i>         | chr10:128933812-128958277 | 1.5536   | 1.8534   | 0.2545  | 0.530789 |
| <i>Sfxn1</i>         | chr13:54071844-54108346   | 18.4375  | 17.8688  | -0.0452 | 0.184815 |
| <i>Gusb</i>          | chr5:129989010-130003049  | 9.7963   | 9.4263   | -0.0555 | 0.422921 |
| <i>Camk1</i>         | chr6:113334123-113343984  | 0.9224   | 1.0403   | 0.1735  | 0.274798 |
| <i>Hgsnat</i>        | chr8:25944458-25976744    | 14.7301  | 14.0711  | -0.0660 | 0.439926 |
| <i>Gm15561</i>       | chr12:69267770-69273432   | 8.8980   | 7.8892   | -0.1736 | 0.394419 |
| <i>Tmcc3</i>         | chr10:94311948-94590956   | 0.9924   | 0.9059   | -0.1317 | 0.329458 |
| <i>Smg8</i>          | chr11:87077731-87086774   | 8.9585   | 8.5483   | -0.0676 | 0.393081 |
| <i>Lonp2</i>         | chr8:86624042-86723873    | 36.0492  | 35.3021  | -0.0302 | 0.348178 |
| <i>Med18</i>         | chr4:132458730-132463921  | 7.0057   | 6.5620   | -0.0944 | 0.359344 |
| <i>Kdm3b</i>         | chr18:34777007-34839370   | 23.0969  | 24.6248  | 0.0924  | 0.349923 |
| <i>Mrps23</i>        | chr11:88204387-88211507   | 33.0310  | 31.2822  | -0.0785 | 0.500322 |
| <i>Ptp4a3</i>        | chr15:73723144-73758766   | 17.5393  | 16.6514  | -0.0749 | 0.574401 |
| <i>Rtf1</i>          | chr2:119675067-119735407  | 21.1119  | 20.3702  | -0.0516 | 0.507075 |
| <i>1110008F13Rik</i> | chr2:156863127-156873563  | 23.9302  | 22.9605  | -0.0597 | 0.469249 |
| <i>Dpm2</i>          | chr2:32570857-32573579    | 12.6890  | 13.7524  | 0.1161  | 0.247823 |



|                      |                           |           |           |         |          |
|----------------------|---------------------------|-----------|-----------|---------|----------|
| <i>Adora2a</i>       | chr10:75316942-75334788   | 5.9040    | 5.4105    | -0.1259 | 0.512230 |
| <i>9930104L06Rik</i> | chr4:124937047-124944656  | 6.9584    | 6.6746    | -0.0601 | 0.420689 |
| <i>Hmg20b</i>        | chr10:81346047-81350480   | 5.5462    | 6.0896    | 0.1348  | 0.321743 |
| <i>Zfp748</i>        | chr13:67538640-67553138   | 18.4311   | 17.6766   | -0.0603 | 0.510572 |
| <i>Jmy</i>           | chr13:93430096-93499808   | 5.8811    | 6.3708    | 0.1154  | 0.404235 |
| <i>Klh124</i>        | chr16:20097553-20127744   | 36.6801   | 38.8855   | 0.0842  | 0.299369 |
| <i>4933421O10Rik</i> | chr4:33027141-33031323    | 2.1396    | 2.3801    | 0.1537  | 0.237010 |
| <i>Hist1h2bk</i>     | chr13:22035820-22036299   | 8.1359    | 9.5624    | 0.2331  | 0.408893 |
| <i>Gm9828</i>        | chr13:98316421-98324415   | 7.2165    | 8.2452    | 0.1923  | 0.520860 |
| <i>Cd101</i>         | chr3:100993529-101029556  | 7.9618    | 7.4219    | -0.1013 | 0.544709 |
| <i>Eif4b</i>         | chr15:102073772-102097172 | 161.4791  | 156.7025  | -0.0433 | 0.522580 |
| <i>Galnt11</i>       | chr5:25222881-25265918    | 15.3365   | 14.6627   | -0.0648 | 0.489613 |
| <i>Myo7a</i>         | chr7:98051059-98119524    | 0.6125    | 0.5450    | -0.1685 | 0.463703 |
| <i>Gm17035</i>       | chr15:66929606-66931107   | 14.4167   | 12.9217   | -0.1579 | 0.479707 |
| <i>Bzw1</i>          | chr1:58393135-58406548    | 93.9925   | 90.3771   | -0.0566 | 0.529700 |
| <i>Rpl4</i>          | chr9:64173386-64178562    | 1363.3559 | 1282.6899 | -0.0880 | 0.561256 |
| <i>Tsta3</i>         | chr15:75924683-75929730   | 22.1240   | 21.0297   | -0.0732 | 0.453612 |
| <i>Hdac10</i>        | chr15:89123306-89128700   | 11.5268   | 11.0481   | -0.0612 | 0.487530 |
| <i>Ttc17</i>         | chr2:94300766-94406689    | 10.2566   | 10.8449   | 0.0805  | 0.203092 |
| <i>Chd4</i>          | chr6:125095980-125130591  | 88.8873   | 93.6888   | 0.0759  | 0.218700 |
| <i>Scoc</i>          | chr8:83434492-83458391    | 2.3043    | 2.6444    | 0.1986  | 0.348003 |
| <i>Qrich1</i>        | chr9:108517086-108560167  | 84.1834   | 81.7723   | -0.0419 | 0.471990 |
| <i>Gm19684</i>       | chr17:36121677-36129692   | 2.4380    | 2.8160    | 0.2080  | 0.209649 |
| <i>Tmem87b</i>       | chr2:128818117-128854261  | 12.7451   | 12.3519   | -0.0452 | 0.471580 |
| <i>Spata2</i>        | chr2:167481132-167492887  | 5.6460    | 5.2979    | -0.0918 | 0.551363 |
| <i>Mbip</i>          | chr12:56328305-56345894   | 13.9594   | 15.0811   | 0.1115  | 0.201358 |
| <i>Ski</i>           | chr4:155154074-15522592   | 34.7455   | 37.0519   | 0.0927  | 0.343979 |
| <i>Fads6</i>         | chr11:115279621-115297663 | 1.2318    | 1.1202    | -0.1370 | 0.458250 |
| <i>Rpsud3</i>        | chr6:113415318-113419348  | 6.1229    | 5.7652    | -0.0868 | 0.190873 |
| <i>Rad23b</i>        | chr4:55350042-55392237    | 24.1670   | 25.8473   | 0.0970  | 0.320806 |
| <i>Ipo13</i>         | chr4:117894485-117914999  | 3.8296    | 4.2741    | 0.1584  | 0.410384 |
| <i>NA</i>            | chr10:5020202-5069063     | 17.6544   | 16.7048   | -0.0798 | 0.574780 |
| <i>Acaca</i>         | chr11:84129671-84401651   | 2.8414    | 2.6959    | -0.0758 | 0.475570 |
| <i>Pqlc3</i>         | chr12:16988647-17000408   | 5.6226    | 6.0833    | 0.1136  | 0.339414 |
| <i>Gtf2h5</i>        | chr17:6079785-6086517     | 7.0145    | 7.6567    | 0.1264  | 0.363014 |
| <i>1110037F02Rik</i> | chr4:11485957-11550684    | 33.5235   | 35.0879   | 0.0658  | 0.069334 |
| <i>Gfer</i>          | chr17:24693190-24696156   | 13.8686   | 12.9324   | -0.1008 | 0.502546 |
| <i>2010300F17Rik</i> | chr11:96712981-96747436   | 22.5184   | 24.0098   | 0.0925  | 0.268048 |
| <i>Gm17139</i>       | chr12:84918147-84919238   | 27.0688   | 29.5550   | 0.1268  | 0.297362 |
| <i>Ptpn4</i>         | chr1:119658043-119837613  | 7.0399    | 7.5563    | 0.1021  | 0.307515 |
| <i>Rcn1</i>          | chr2:105386290-105399319  | 17.3346   | 16.6945   | -0.0543 | 0.485783 |
| <i>Ttpal</i>         | chr2:163602313-163619013  | 20.5243   | 19.9625   | -0.0400 | 0.482433 |
| <i>Gm9958</i>        | chr5:90367203-90368487    | 4.0924    | 4.7644    | 0.2193  | 0.414675 |
| <i>Plekha2</i>       | chr8:25039143-25102194    | 39.0381   | 37.9031   | -0.0426 | 0.501341 |
| <i>Nat2</i>          | chr8:67494866-67502580    | 14.9162   | 16.4037   | 0.1371  | 0.375700 |
| <i>Usp10</i>         | chr8:119910359-119957560  | 13.6057   | 13.2007   | -0.0436 | 0.466261 |
| <i>Mtcp1</i>         | chrX:75404845-75416584    | 8.9715    | 9.7960    | 0.1269  | 0.114101 |
| <i>Fndc3a</i>        | chr14:72537945-72710003   | 10.4083   | 11.0645   | 0.0882  | 0.263814 |
| <i>E430024P14Rik</i> | chr17:7881105-7946426     | 8.9195    | 9.6929    | 0.1200  | 0.397339 |
| <i>Vars2</i>         | chr17:35655633-35667592   | 9.6346    | 9.2081    | -0.0653 | 0.538628 |
| <i>Xrcc5</i>         | chr1:72307420-72394952    | 23.6607   | 22.6397   | -0.0636 | 0.524838 |
| <i>Cttna1</i>        | chr18:35118887-35254773   | 7.7460    | 8.5033    | 0.1346  | 0.438892 |
| <i>Mllt10</i>        | chr2:18055236-18212388    | 23.8799   | 25.1169   | 0.0729  | 0.115525 |
| <i>Arpc5l</i>        | chr2:39008075-39015877    | 29.3503   | 28.5421   | -0.0403 | 0.431794 |
| <i>Pmpcb</i>         | chr5:21737140-21757152    | 15.1689   | 14.6433   | -0.0509 | 0.471623 |
| <i>H2-Q6</i>         | chr17:35424849-35430055   | 80.4307   | 88.0599   | 0.1307  | 0.490444 |
| <i>Flot2</i>         | chr11:78037930-78060434   | 16.1626   | 15.3469   | -0.0747 | 0.540639 |
| <i>Cox4i1</i>        | chr8:120668221-120674207  | 114.5347  | 108.0241  | -0.0844 | 0.556188 |
| <i>Sh3bp1</i>        | chr15:78899666-78919032   | 42.8646   | 41.1648   | -0.0584 | 0.582751 |
| <i>Qk</i>            | chr17:10206470-10319361   | 8.9777    | 9.5286    | 0.0859  | 0.219261 |
| <i>Elk4</i>          | chr1:132007606-132032612  | 43.1022   | 46.1765   | 0.0994  | 0.364240 |
| <i>Gipc1</i>         | chr8:83652677-83664788    | 18.1550   | 17.2350   | -0.0750 | 0.520849 |
| <i>Tap2</i>          | chr17:34203526-34216321   | 63.9727   | 61.6544   | -0.0533 | 0.594844 |
| <i>Nemf</i>          | chr12:69311543-69357176   | 42.0893   | 44.4421   | 0.0785  | 0.214568 |
| <i>Smc5</i>          | chr19:23206440-23273897   | 16.8872   | 17.9134   | 0.0851  | 0.250493 |
| <i>Zfp189</i>        | chr4:49521175-49531517    | 3.5290    | 3.8858    | 0.1390  | 0.252831 |
| <i>Lnx2</i>          | chr5:147016654-147076586  | 13.1541   | 14.2267   | 0.1131  | 0.413169 |
| <i>Ap2a2</i>         | chr7:141562179-141633011  | 32.0517   | 31.2075   | -0.0385 | 0.415395 |
| <i>Pced1a</i>        | chr2:130417246-130424701  | 8.5114    | 8.2556    | -0.0440 | 0.212985 |
| <i>Zdhhc4</i>        | chr5:143316488-143329256  | 12.2965   | 11.8357   | -0.0551 | 0.372701 |
| <i>2210016F16Rik</i> | chr13:58380045-58385225   | 18.0491   | 17.2924   | -0.0618 | 0.463371 |

|                      |                           |          |          |         |          |
|----------------------|---------------------------|----------|----------|---------|----------|
| <i>Nbeal2</i>        | chr9:110624788-110654161  | 14.2084  | 15.4012  | 0.1163  | 0.436482 |
| <i>Hibch</i>         | chr1:52845012-52920986    | 11.1838  | 10.5659  | -0.0820 | 0.450623 |
| <i>Dazap1</i>        | chr10:80261485-80288408   | 30.5271  | 29.1959  | -0.0643 | 0.565817 |
| <i>Stk10</i>         | chr11:32533304-32624587   | 107.1033 | 104.4114 | -0.0367 | 0.550449 |
| <i>Pqlc2</i>         | chr4:139294028-139310708  | 1.6086   | 1.4599   | -0.1399 | 0.364044 |
| <i>Mdm2</i>          | chr10:117688887-117710758 | 26.6354  | 25.8242  | -0.0446 | 0.526218 |
| <i>Mlst8</i>         | chr17:24473549-24479078   | 12.9288  | 12.4788  | -0.0511 | 0.433135 |
| <i>Dnajc16</i>       | chr4:141760188-141790931  | 5.3932   | 5.7807   | 0.1001  | 0.231206 |
| <i>Aasdh</i>         | chr5:76873658-76905514    | 5.2189   | 5.0179   | -0.0567 | 0.425478 |
| <i>Foxo4</i>         | chrX:101254527-101260873  | 13.7496  | 14.7353  | 0.0999  | 0.326375 |
| <i>Pcgf1</i>         | chr6:83077868-83080855    | 5.5016   | 6.1456   | 0.1597  | 0.302818 |
| <i>Tdrd3</i>         | chr14:87416638-87545373   | 6.9400   | 6.6850   | -0.0540 | 0.343425 |
| <i>Zfp692</i>        | chr11:58307068-58314627   | 21.3397  | 20.5791  | -0.0524 | 0.388961 |
| <i>Iji27</i>         | chr12:103434210-103440239 | 62.4315  | 67.1295  | 0.1047  | 0.400518 |
| <i>Agbl3</i>         | chr6:34780431-34859459    | 0.8216   | 0.7456   | -0.1401 | 0.489092 |
| <i>Senp2</i>         | chr16:22009483-22049269   | 23.1263  | 22.4125  | -0.0452 | 0.513696 |
| <i>Klhl12</i>        | chr1:134455530-134491018  | 5.2080   | 5.0267   | -0.0511 | 0.256395 |
| <i>Man1a</i>         | chr10:53904787-54075796   | 25.6508  | 25.0382  | -0.0349 | 0.500099 |
| <i>B130046B21Rik</i> | chr15:98807031-98816077   | 36.0302  | 35.0230  | -0.0409 | 0.392691 |
| <i>Eml3</i>          | chr19:8929693-8941563     | 26.6431  | 25.4803  | -0.0644 | 0.594005 |
| <i>Sbno2</i>         | chr10:80057415-80102698   | 23.6084  | 26.0024  | 0.1393  | 0.480684 |
| <i>Acat3</i>         | chr17:12923832-12940402   | 21.0350  | 19.9618  | -0.0756 | 0.507116 |
| <i>Lsm6</i>          | chr8:78804864-78821140    | 7.9820   | 8.5078   | 0.0920  | 0.048052 |
| <i>Stx5a</i>         | chr19:8741412-8756069     | 24.0843  | 23.4282  | -0.0398 | 0.502624 |
| <i>Kcmf1</i>         | chr6:72841113-72899979    | 20.6254  | 19.8714  | -0.0537 | 0.466933 |
| <i>Gpr4</i>          | chr7:19212537-19224176    | 1.3407   | 1.5603   | 0.2189  | 0.305385 |
| <i>Ccdc15</i>        | chr9:37275834-37348392    | 4.1847   | 4.5757   | 0.1289  | 0.271175 |
| <i>Prpf40a</i>       | chr2:53134703-53191284    | 21.4614  | 22.6894  | 0.0803  | 0.233676 |
| <i>Mmachc</i>        | chr4:116702278-116708406  | 3.8905   | 3.6059   | -0.1096 | 0.297188 |
| <i>Elp2</i>          | chr18:24603960-24638830   | 37.3524  | 36.5000  | -0.0333 | 0.318439 |
| <i>Cd3g</i>          | chr9:44969571-44980431    | 587.9208 | 556.7359 | -0.0786 | 0.558733 |
| <i>Urgcp</i>         | chr11:5713416-5762376     | 10.3346  | 10.0165  | -0.0451 | 0.377596 |
| <i>Wfikkn2</i>       | chr11:94235955-94246005   | 2.7292   | 3.1424   | 0.2034  | 0.492804 |
| <i>Mccc2</i>         | chr13:99948532-100015639  | 6.9824   | 6.5490   | -0.0924 | 0.434212 |
| <i>BC147527</i>      | chr13:120308145-120308649 | 35.0565  | 32.0191  | -0.1307 | 0.531999 |
| <i>1700028K03Rik</i> | chr5:107508943-107551549  | 1.1035   | 1.2419   | 0.1704  | 0.402666 |
| <i>4930512H18Rik</i> | chr8:61849005-61922834    | 3.0110   | 3.6773   | 0.2884  | 0.485439 |
| <i>Vill</i>          | chr9:119052777-119071525  | 1.2838   | 1.1300   | -0.1841 | 0.515884 |
| <i>Cab39l</i>        | chr14:59440980-59548903   | 24.0918  | 23.1784  | -0.0558 | 0.520456 |
| <i>Cd5</i>           | chr19:10718142-10738974   | 216.0924 | 231.0524 | 0.0966  | 0.391892 |
| <i>Gm13477</i>       | chr2:44788264-44790951    | 1.7009   | 1.9306   | 0.1827  | 0.165399 |
| <i>Sdcbp2</i>        | chr2:151572621-151590005  | 9.4165   | 10.7306  | 0.1885  | 0.525724 |
| <i>Hiat1</i>         | chr3:116631163-116681260  | 25.9583  | 25.1075  | -0.0481 | 0.498417 |
| <i>Dlst</i>          | chr12:85110832-85134091   | 48.8419  | 47.6278  | -0.0363 | 0.489987 |
| <i>Arvcf</i>         | chr16:18348181-18407076   | 0.9328   | 0.8429   | -0.1463 | 0.453879 |
| <i>C230037L18Rik</i> | chr15:89476235-89484847   | 1.8556   | 2.1494   | 0.2120  | 0.249500 |
| <i>Btg2</i>          | chr1:134075169-134079120  | 139.8556 | 135.9423 | -0.0409 | 0.509239 |
| <i>Trbj1-2</i>       | chr6:41534000-41534048    | 253.7726 | 279.6771 | 0.1402  | 0.327757 |
| <i>Enox2</i>         | chrX:49009706-49288259    | 5.8468   | 5.5241   | -0.0819 | 0.481757 |
| <i>Mgme1</i>         | chr2:144270662-144281227  | 2.6332   | 2.4171   | -0.1235 | 0.433495 |
| <i>Hip1</i>          | chr5:135406522-135545122  | 0.5735   | 0.9223   | 0.6855  | 0.412755 |
| <i>Rngtt</i>         | chr4:33310310-33502614    | 11.6626  | 11.3635  | -0.0375 | 0.359807 |
| <i>Hnrnpc</i>        | chr14:52073379-52104028   | 50.3671  | 54.1538  | 0.1046  | 0.354494 |
| <i>Slc8b1</i>        | chr5:120511167-120534024  | 2.4742   | 2.2878   | -0.1130 | 0.244402 |
| <i>Ccdc47</i>        | chr11:106197407-106216344 | 15.0480  | 14.5576  | -0.0478 | 0.499717 |
| <i>Cnp</i>           | chr11:100574903-100591729 | 73.0236  | 71.0341  | -0.0399 | 0.495991 |
| <i>Tnfrsf1a</i>      | chr6:125349361-125362484  | 11.4991  | 10.8912  | -0.0784 | 0.514904 |
| <i>Ppt1</i>          | chr4:122836241-122859175  | 25.9060  | 27.3376  | 0.0776  | 0.160944 |
| <i>Park7</i>         | chr4:150897132-150914437  | 39.0190  | 37.2328  | -0.0676 | 0.532204 |
| <i>Sepw1</i>         | chr7:15917207-15922402    | 93.1867  | 87.9956  | -0.0827 | 0.569059 |
| <i>E130208F15Rik</i> | chr7:30321739-30323472    | 8.9727   | 9.7841   | 0.1249  | 0.285059 |
| <i>Hist1h4h</i>      | chr13:23531043-23531519   | 150.1331 | 129.5711 | -0.2125 | 0.405813 |
| <i>Capn15</i>        | chr17:25959555-25985680   | 4.2178   | 4.7471   | 0.1705  | 0.479345 |
| <i>Epb4.1</i>        | chr4:131923412-132075321  | 22.8424  | 24.1201  | 0.0785  | 0.205923 |
| <i>Igf2bp3</i>       | chr6:49085220-49214954    | 2.7158   | 2.9755   | 0.1318  | 0.212743 |
| <i>Baz2b</i>         | chr2:59899362-60209839    | 7.5383   | 8.0533   | 0.0953  | 0.375076 |
| <i>Snora7a</i>       | chr6:115807974-115808114  | 80.9912  | 93.8174  | 0.2121  | 0.536242 |
| <i>Cndp2</i>         | chr18:84667469-84685633   | 20.3893  | 22.0584  | 0.1135  | 0.334653 |
| <i>Rcbtb2</i>        | chr14:73123036-73207843   | 10.3870  | 10.0279  | -0.0508 | 0.502796 |
| <i>Gm21972</i>       | chr1:86133636-86162788    | 17.1416  | 18.8280  | 0.1354  | 0.332662 |
| <i>Pmf1</i>          | chr3:88394142-88410316    | 13.9568  | 13.0033  | -0.1021 | 0.493046 |

|                      |                           |         |         |         |          |
|----------------------|---------------------------|---------|---------|---------|----------|
| <i>Cntd1</i>         | chr11:101279011-101296317 | 18.2033 | 17.5004 | -0.0568 | 0.490218 |
| <i>PsmA6</i>         | chr12:55384221-55418454   | 45.3668 | 49.2821 | 0.1194  | 0.390780 |
| <i>Pmm1</i>          | chr15:81951107-81960930   | 3.0769  | 3.3810  | 0.1360  | 0.019411 |
| <i>Map3k7</i>        | chr4:31964096-32023467    | 18.4521 | 17.9581 | -0.0391 | 0.524746 |
| <i>Elovl1</i>        | chr4:118428092-118432953  | 16.3898 | 15.8607 | -0.0473 | 0.382358 |
| <i>Lrrc71</i>        | chr3:87736922-87748625    | 3.2625  | 3.0426  | -0.1007 | 0.529410 |
| <i>Serinc5</i>       | chr13:92611137-92711944   | 9.9546  | 10.9512 | 0.1377  | 0.496166 |
| <i>Rsu1</i>          | chr2:13076966-13271431    | 5.5809  | 5.3145  | -0.0705 | 0.507236 |
| <i>Ccdc134</i>       | chr15:82127921-82142200   | 15.9356 | 15.1262 | -0.0752 | 0.506635 |
| <i>Hist1h1a</i>      | chr13:23763667-23764414   | 26.7784 | 32.8658 | 0.2955  | 0.409169 |
| <i>Cmya5</i>         | chr13:93040712-93144724   | 0.9213  | 1.0229  | 0.1509  | 0.363285 |
| <i>Plcd4</i>         | chr1:74542887-74567794    | 0.9891  | 0.9012  | -0.1342 | 0.310759 |
| <i>Xrcc1</i>         | chr7:24547149-24573438    | 18.8688 | 18.1556 | -0.0556 | 0.458092 |
| <i>Pidd1</i>         | chr7:141438112-141444025  | 1.0266  | 1.1857  | 0.2079  | 0.337477 |
| <i>Mrpl4</i>         | chr9:21002736-21008835    | 20.8906 | 19.8125 | -0.0764 | 0.473249 |
| <i>Pop5</i>          | chr5:115235835-115245351  | 21.0933 | 20.3022 | -0.0552 | 0.414751 |
| <i>Csf1r</i>         | chr18:61105571-61132149   | 3.2920  | 3.0632  | -0.1039 | 0.543297 |
| <i>Zfp574</i>        | chr7:25077204-25083492    | 8.0787  | 7.6998  | -0.0693 | 0.557086 |
| <i>Egln3</i>         | chr12:54178980-54203860   | 1.7901  | 2.2254  | 0.3140  | 0.575782 |
| <i>Spata2l</i>       | chr8:123232254-123236209  | 5.1793  | 4.8094  | -0.1069 | 0.542433 |
| <i>Plekho2</i>       | chr9:65554385-65580040    | 13.3213 | 14.2603 | 0.0983  | 0.307230 |
| <i>Sec24c</i>        | chr14:20674320-20694850   | 55.7765 | 58.7889 | 0.0759  | 0.270185 |
| <i>Ccnf</i>          | chr17:24223231-24251409   | 1.3807  | 1.6259  | 0.2358  | 0.476789 |
| <i>Frrs1</i>         | chr3:116878226-116903750  | 3.5487  | 3.9364  | 0.1496  | 0.258045 |
| <i>Slc27a1</i>       | chr8:71568926-71586708    | 2.3024  | 2.1100  | -0.1259 | 0.275583 |
| <i>Hcfc1r1</i>       | chr17:23673595-23675227   | 11.0418 | 12.2277 | 0.1472  | 0.346788 |
| <i>Zfp26</i>         | chr9:20432971-20460162    | 19.9511 | 20.8955 | 0.0667  | 0.064010 |
| <i>Atp6v1f</i>       | chr6:29467717-29470512    | 38.2246 | 35.9704 | -0.0877 | 0.531507 |
| <i>Dguok</i>         | chr6:83480216-83506969    | 21.4340 | 20.7864 | -0.0443 | 0.240530 |
| <i>Slc9a6</i>        | chrX:56609756-56664230    | 7.3710  | 7.8747  | 0.0954  | 0.238643 |
| <i>Ppp1r12b</i>      | chr1:134754657-134955942  | 3.0404  | 2.9134  | -0.0616 | 0.543693 |
| <i>Rer1</i>          | chr4:155074109-155086382  | 80.5858 | 77.2106 | -0.0617 | 0.533456 |
| <i>Asah2</i>         | chr19:31984653-32061469   | 2.6202  | 2.4237  | -0.1124 | 0.516727 |
| <i>Nme7</i>          | chr1:164312878-164348181  | 10.6526 | 9.8061  | -0.1195 | 0.430295 |
| <i>Strn3</i>         | chr12:51608540-51691914   | 27.8277 | 29.1679 | 0.0679  | 0.018336 |
| <i>Nup155</i>        | chr15:8109312-8159857     | 11.6250 | 11.2462 | -0.0478 | 0.541139 |
| <i>Lcmt2</i>         | chr2:121128306-121140698  | 5.8267  | 6.3127  | 0.1156  | 0.290954 |
| <i>App2</i>          | chr10:83600032-83648738   | 12.8364 | 12.0991 | -0.0853 | 0.569530 |
| <i>Gm11706</i>       | chr11:106814669-106816008 | 13.8042 | 12.2906 | -0.1675 | 0.404862 |
| <i>Aldh6a1</i>       | chr12:84430722-84450950   | 10.1068 | 9.7207  | -0.0562 | 0.396532 |
| <i>Cep72</i>         | chr13:74036494-74062285   | 3.4302  | 3.2080  | -0.0966 | 0.420395 |
| <i>Dhx29</i>         | chr13:112927729-112969431 | 13.2336 | 12.6540 | -0.0646 | 0.526786 |
| <i>Gdpgp1</i>        | chr7:80232866-80241006    | 7.7722  | 7.4217  | -0.0666 | 0.463681 |
| <i>AcsM3</i>         | chr7:119760922-119787513  | 1.3454  | 1.4973  | 0.1543  | 0.222538 |
| <i>Gm16163</i>       | chr8:124831697-124863703  | 10.4242 | 9.7449  | -0.0972 | 0.404814 |
| <i>Wac</i>           | chr18:7868831-7973547     | 19.6426 | 20.8730 | 0.0877  | 0.258339 |
| <i>Taf13</i>         | chr3:108571697-108583222  | 3.5751  | 3.9273  | 0.1355  | 0.294342 |
| <i>Sep15</i>         | chr3:144570303-144597680  | 63.0323 | 59.0611 | -0.0939 | 0.565675 |
| <i>Ldlrap1</i>       | chr4:134744734-134768024  | 34.9555 | 34.0940 | -0.0360 | 0.539172 |
| <i>Eno1</i>          | chr4:150236720-150248879  | 16.3821 | 15.6936 | -0.0619 | 0.565704 |
| <i>Tespa1</i>        | chr10:130322851-130362642 | 62.9756 | 60.3973 | -0.0603 | 0.568140 |
| <i>Aak1</i>          | chr6:86849516-86991864    | 7.3520  | 8.0436  | 0.1297  | 0.475664 |
| <i>Ikzf5</i>         | chr7:131388651-131410521  | 6.5244  | 6.9823  | 0.0978  | 0.270898 |
| <i>PsmD13</i>        | chr7:140881967-140898643  | 17.8921 | 17.2961 | -0.0489 | 0.431141 |
| <i>5031439G07Rik</i> | chr15:84943935-84988551   | 3.7919  | 3.6293  | -0.0632 | 0.492813 |
| <i>Tsc2</i>          | chr17:24595936-24632629   | 10.4540 | 11.3292 | 0.1160  | 0.428321 |
| <i>Srsf11</i>        | chr3:158010472-158036639  | 29.1964 | 30.6712 | 0.0711  | 0.156570 |
| <i>Gm13204</i>       | chr4:148569055-148569876  | 10.2798 | 9.4899  | -0.1153 | 0.440997 |
| <i>Ganc</i>          | chr2:120403895-120461700  | 5.5106  | 5.2700  | -0.0644 | 0.548623 |
| <i>Nrbf2</i>         | chr10:67266688-67285305   | 3.7581  | 4.1622  | 0.1473  | 0.067873 |
| <i>Tmem120b</i>      | chr5:123068414-123117749  | 6.2493  | 5.9280  | -0.0762 | 0.444654 |
| <i>Nadsyn1</i>       | chr7:143795583-143822849  | 6.1134  | 5.7657  | -0.0845 | 0.492465 |
| <i>Ddx19a</i>        | chr8:110974995-110997800  | 5.1118  | 5.5240  | 0.1119  | 0.053171 |
| <i>Nhej1</i>         | chr1:74967138-75046639    | 5.2232  | 4.7444  | -0.1387 | 0.364372 |
| <i>Gapvd1</i>        | chr2:34676183-34755232    | 27.8884 | 29.3483 | 0.0736  | 0.208963 |
| <i>Acer2</i>         | chr4:86874395-86934822    | 1.4202  | 1.3217  | -0.1037 | 0.396938 |
| <i>Fam160a2</i>      | chr7:105371210-105373718  | 1.7223  | 2.0036  | 0.2183  | 0.360707 |
| <i>Gemin6</i>        | chr17:80224440-80228497   | 4.4482  | 3.8678  | -0.2017 | 0.490085 |
| <i>Uxs1</i>          | chr1:43746965-43827800    | 2.7168  | 2.9964  | 0.1414  | 0.372371 |
| <i>Mafg</i>          | chr11:120625116-120633600 | 4.7169  | 5.1642  | 0.1307  | 0.426656 |
| <i>Prkrip1</i>       | chr5:136178126-136198963  | 5.9773  | 5.7040  | -0.0675 | 0.339062 |

|                      |                           |          |          |         |          |
|----------------------|---------------------------|----------|----------|---------|----------|
| <i>Atad2</i>         | chr15:58094046-58135082   | 17.8045  | 19.0079  | 0.0944  | 0.370749 |
| <i>Pik3r5</i>        | chr11:68432120-68497849   | 39.3263  | 38.1114  | -0.0453 | 0.578133 |
| <i>Rpa1</i>          | chr11:75298165-75348324   | 55.0182  | 53.2383  | -0.0474 | 0.562698 |
| <i>Sp4</i>           | chr12:118234932-118301440 | 40.0808  | 39.3285  | -0.0273 | 0.400234 |
| <i>Gm20603</i>       | chr9:21028306-21032357    | 3.4485   | 3.7890   | 0.1358  | 0.346247 |
| <i>Taf7</i>          | chr18:37640901-37644204   | 20.7473  | 19.6113  | -0.0812 | 0.552160 |
| <i>Chd6</i>          | chr2:160946977-161109075  | 14.9360  | 15.7513  | 0.0767  | 0.288782 |
| <i>Trim30a</i>       | chr7:104409024-104465193  | 54.6018  | 58.8102  | 0.1071  | 0.455646 |
| <i>Sugp2</i>         | chr8:70234225-70279915    | 9.2637   | 8.9500   | -0.0497 | 0.582766 |
| <i>Rpl14</i>         | chr9:120571516-120574653  | 359.4861 | 322.5918 | -0.1562 | 0.440647 |
| <i>5730455P16Rik</i> | chr11:80360491-80378034   | 5.2155   | 5.6874   | 0.1250  | 0.393628 |
| <i>Gm17083</i>       | chr13:34006965-34008331   | 3.9666   | 4.5155   | 0.1870  | 0.360591 |
| <i>Zfp74</i>         | chr7:29930814-29954089    | 3.4460   | 3.7245   | 0.1121  | 0.215763 |
| <i>Cdc14a</i>        | chr3:116272552-116424032  | 2.3980   | 2.5657   | 0.0975  | 0.156328 |
| <i>Tlcd1</i>         | chr11:78176710-78181909   | 3.5951   | 3.4230   | -0.0708 | 0.274714 |
| <i>6430562O15Rik</i> | chr13:99396923-99412864   | 0.7302   | 0.8507   | 0.2204  | 0.406910 |
| <i>Smarcd1</i>       | chr15:99702286-99713995   | 12.0802  | 13.1135  | 0.1184  | 0.411912 |
| <i>Ranbp1</i>        | chr16:18239783-18248732   | 48.6376  | 46.0262  | -0.0796 | 0.553276 |
| <i>Phf5a</i>         | chr15:81865318-81871911   | 33.6690  | 31.9349  | -0.0763 | 0.492044 |
| <i>Fxr1</i>          | chr3:34020078-34069342    | 48.3249  | 51.4218  | 0.0896  | 0.291477 |
| <i>Tbk1</i>          | chr10:121546454-121586794 | 37.7444  | 39.6042  | 0.0694  | 0.084217 |
| <i>Rsl1</i>          | chr13:67173206-67183126   | 9.7662   | 10.5892  | 0.1167  | 0.183554 |
| <i>Zfp410</i>        | chr12:84316858-84343830   | 16.7764  | 16.2587  | -0.0452 | 0.339902 |
| <i>Fem1c</i>         | chr18:46501745-46525971   | 11.0661  | 11.6839  | 0.0784  | 0.137988 |
| <i>Ppa2</i>          | chr3:133310109-133378235  | 10.6706  | 10.0869  | -0.0812 | 0.501282 |
| <i>Dennd5a</i>       | chr7:109893779-109960470  | 4.4957   | 4.8013   | 0.0949  | 0.283287 |
| <i>Ube2t</i>         | chr1:134962564-134974162  | 2.3841   | 2.7149   | 0.1875  | 0.287353 |
| <i>Fbxl20</i>        | chr11:98082555-98150403   | 12.0746  | 12.8369  | 0.0883  | 0.376385 |
| <i>Ankib1</i>        | chr5:3689999-3803109      | 38.2345  | 37.1977  | -0.0397 | 0.493001 |
| <i>1700037H04Rik</i> | chr2:131146324-131160081  | 3.8699   | 3.5286   | -0.1332 | 0.508816 |
| <i>Dlg4</i>          | chr11:70017084-70045532   | 3.3719   | 3.1907   | -0.0797 | 0.483876 |
| <i>Dek</i>           | chr13:47084774-47106201   | 49.8363  | 52.9385  | 0.0871  | 0.320845 |
| <i>Prkag2os2</i>     | chr5:24873543-24875934    | 3.7509   | 4.2793   | 0.1901  | 0.372300 |
| <i>Dnajb11</i>       | chr16:22857844-22879634   | 30.1334  | 29.3521  | -0.0379 | 0.417922 |
| <i>Grpel2</i>        | chr18:61712439-61726331   | 10.4948  | 10.1011  | -0.0552 | 0.438930 |
| <i>Prdm11</i>        | chr2:92965150-93046167    | 1.1051   | 1.2129   | 0.1343  | 0.413048 |
| <i>Ncoa3</i>         | chr2:165992635-166073242  | 35.9891  | 38.1928  | 0.0857  | 0.352309 |
| <i>Ppp3ca</i>        | chr3:136670123-136937727  | 13.4690  | 12.8809  | -0.0644 | 0.563137 |
| <i>Sdf4</i>          | chr4:155992871-156013610  | 51.2416  | 49.6433  | -0.0457 | 0.565719 |
| <i>Traj27</i>        | chr14:54192302-54192361   | 81.7781  | 95.5641  | 0.2248  | 0.438584 |
| <i>Cep19</i>         | chr16:32099799-32108069   | 14.8647  | 14.0028  | -0.0862 | 0.496531 |
| <i>Pabpn1</i>        | chr14:54892499-54898169   | 35.0016  | 33.9755  | -0.0429 | 0.511498 |
| <i>Mycbp2</i>        | chr14:103113410-103346814 | 49.7261  | 47.8332  | -0.0560 | 0.634312 |
| <i>Fam126b</i>       | chr1:58522805-58586323    | 8.1860   | 7.8839   | -0.0542 | 0.542210 |
| <i>Nsf</i>           | chr11:103821781-103954056 | 11.6106  | 11.3045  | -0.0385 | 0.457138 |
| <i>Auh</i>           | chr13:52835118-52929681   | 4.9922   | 4.7888   | -0.0600 | 0.555874 |
| <i>Gm17137</i>       | chr7:126164032-126168403  | 2.5957   | 2.8972   | 0.1585  | 0.435938 |
| <i>1110032A03Rik</i> | chr9:50762827-50775520    | 2.6958   | 2.9988   | 0.1537  | 0.417244 |
| <i>NA</i>            | chr13:67317941-67360605   | 6.6461   | 7.0893   | 0.0931  | 0.227570 |
| <i>2310047M10Rik</i> | chr11:69059774-69061576   | 10.6884  | 10.1844  | -0.0697 | 0.353029 |
| <i>Phka2</i>         | chrX:160502165-160598878  | 4.0449   | 4.3914   | 0.1186  | 0.383873 |
| <i>Mir1894</i>       | chr17:35917888-35917969   | 126.0417 | 138.8144 | 0.1393  | 0.244439 |
| <i>Gbp11</i>         | chr5:105323041-105346472  | 12.1450  | 13.3375  | 0.1351  | 0.456531 |
| <i>Gpr137</i>        | chr19:6938068-6942450     | 4.4400   | 4.1025   | -0.1141 | 0.493299 |
| <i>Zmynd11</i>       | chr13:9684835-9765321     | 25.1770  | 24.7253  | -0.0261 | 0.273510 |
| <i>Napepld</i>       | chr5:21662900-21701396    | 2.7132   | 2.5324   | -0.0995 | 0.372408 |
| <i>Zfp644</i>        | chr5:106500893-106697287  | 23.0359  | 22.5944  | -0.0279 | 0.404601 |
| <i>NA</i>            | chr8:122443655-122445647  | 8.3899   | 7.9662   | -0.0748 | 0.322851 |
| <i>Pfdn5</i>         | chr15:102326115-102331873 | 120.0935 | 111.2858 | -0.1099 | 0.590429 |
| <i>Mob2</i>          | chr7:142008552-142061034  | 27.6083  | 26.7202  | -0.0472 | 0.340315 |
| <i>Gm20604</i>       | chr12:102741731-102758672 | 6.0728   | 6.5410   | 0.1072  | 0.081648 |
| <i>Amd1</i>          | chr10:40287457-40302188   | 4.1520   | 4.5253   | 0.1242  | 0.249982 |
| <i>Hexdc</i>         | chr11:121204432-121222655 | 2.3278   | 2.5691   | 0.1423  | 0.336365 |
| <i>Tdp1</i>          | chr12:99884516-99955219   | 2.3743   | 2.6114   | 0.1373  | 0.315659 |
| <i>Ighm</i>          | chr12:113418949-113422730 | 210.7009 | 198.1364 | -0.0887 | 0.618396 |
| <i>Agtpbbp1</i>      | chr13:59449536-59585227   | 7.0785   | 6.8922   | -0.0385 | 0.456795 |
| <i>Gigyf1</i>        | chr5:137518879-137527934  | 8.4092   | 9.1750   | 0.1257  | 0.449299 |
| <i>Erc1</i>          | chr6:119570803-119848150  | 2.9799   | 3.2058   | 0.1054  | 0.297465 |
| <i>Tfpt</i>          | chr7:3620323-3629929      | 15.2957  | 14.4406  | -0.0830 | 0.464629 |
| <i>Cnot3</i>         | chr7:3645289-3661108      | 11.6699  | 12.5012  | 0.0993  | 0.323646 |
| <i>Zfp551</i>        | chr7:12415152-12422751    | 2.9141   | 3.2237   | 0.1457  | 0.230482 |

|               |                           |          |          |         |          |
|---------------|---------------------------|----------|----------|---------|----------|
| BC030336      | chr7:120677619-120734854  | 8.0088   | 7.7365   | -0.0499 | 0.353388 |
| Ccl25         | chr8:4325209-4360020      | 1.8505   | 2.0943   | 0.1786  | 0.215901 |
| Nob1          | chr8:107412485-107425051  | 7.5329   | 8.2285   | 0.1274  | 0.364514 |
| Faim          | chr9:98986372-99002018    | 21.7186  | 20.3658  | -0.0928 | 0.535860 |
| Dlg3          | chrX:100767721-100818410  | 3.1414   | 2.9449   | -0.0932 | 0.511697 |
| Nudt13        | chr14:20294689-20317575   | 4.1204   | 3.8322   | -0.1046 | 0.444297 |
| Mrps16        | chr14:20391230-20393555   | 36.5986  | 40.5446  | 0.1477  | 0.459674 |
| Fam208a       | chr14:27428846-27483552   | 48.2092  | 50.7368  | 0.0737  | 0.215529 |
| Sytl3         | chr17:6673457-6738042     | 1.4091   | 1.5937   | 0.1776  | 0.348638 |
| Poltd4        | chr19:4231898-4233631     | 38.3638  | 36.2352  | -0.0824 | 0.532632 |
| Nenf          | chr1:191306788-191318194  | 6.2285   | 5.6292   | -0.1460 | 0.227004 |
| Ino80c        | chr18:24104756-24121953   | 15.4302  | 14.7048  | -0.0695 | 0.511976 |
| Mettl5        | chr2:69871197-69885615    | 13.5567  | 14.6045  | 0.1074  | 0.377584 |
| Slc9a8        | chr2:167421711-167477000  | 9.1122   | 9.7359   | 0.0955  | 0.361840 |
| Cd1d1         | chr3:86995833-86999441    | 18.4941  | 17.7263  | -0.0612 | 0.547362 |
| A730011C13Rik | chr3:94994409-94997350    | 9.4786   | 10.2411  | 0.1116  | 0.250380 |
| Prkab2        | chr3:97658192-97673812    | 2.9039   | 3.2037   | 0.1417  | 0.404806 |
| Txndc12       | chr4:108834600-108862127  | 15.0044  | 14.2401  | -0.0754 | 0.512086 |
| Zbtb40        | chr4:136979731-137048801  | 5.7175   | 5.4245   | -0.0759 | 0.604976 |
| Qrs1          | chr10:43874187-43901745   | 6.0123   | 5.7385   | -0.0673 | 0.387905 |
| D19Bwg1357e   | chr19:27388701-27429820   | 23.4943  | 22.7601  | -0.0458 | 0.465127 |
| Ddx56         | chr11:6258918-6267772     | 25.5676  | 24.5750  | -0.0571 | 0.538299 |
| Exoc3         | chr13:74169804-74208700   | 25.9075  | 25.3373  | -0.0321 | 0.388065 |
| B630019A10Rik | chr16:23175287-23224446   | 16.7194  | 17.9483  | 0.1023  | 0.331181 |
| Zfp560        | chr9:20345135-20385177    | 2.9646   | 3.2118   | 0.1155  | 0.209505 |
| Fbxw17        | chr13:50417863-50433780   | 3.3572   | 3.6598   | 0.1245  | 0.276697 |
| Hdgfrp2       | chr17:56079656-56100596   | 38.1532  | 40.5828  | 0.0891  | 0.318389 |
| Asl           | chr5:130011257-130025132  | 5.8632   | 5.5546   | -0.0780 | 0.507862 |
| Daxx          | chr17:33909413-33915589   | 44.2749  | 47.3372  | 0.0965  | 0.409168 |
| Cnot4         | chr6:35022065-35133737    | 9.6372   | 10.3320  | 0.1004  | 0.387905 |
| Ntng2         | chr2:29194793-29253005    | 2.3748   | 2.6259   | 0.1450  | 0.284219 |
| Cas21         | chr4:148804428-148954889  | 0.4650   | 0.5306   | 0.1905  | 0.397752 |
| Trim37        | chr11:87127076-87220683   | 4.1704   | 3.9823   | -0.0666 | 0.483658 |
| Mrs2          | chr13:24992482-25020379   | 15.2449  | 16.2682  | 0.0937  | 0.154087 |
| Ext2          | chr2:93695630-93822568    | 8.3158   | 8.0235   | -0.0516 | 0.580330 |
| Atad5         | chr11:80089399-80135794   | 3.0280   | 3.2398   | 0.0975  | 0.157585 |
| Stx18         | chr5:38038741-38137765    | 6.5313   | 6.2865   | -0.0551 | 0.291104 |
| Ggct          | chr6:54982579-54992950    | 4.6861   | 5.0480   | 0.1073  | 0.227309 |
| Zfp60         | chr7:27731388-27753702    | 5.6932   | 5.4855   | -0.0536 | 0.454600 |
| Hcst          | chr7:30417716-30419854    | 124.3673 | 117.5402 | -0.0815 | 0.550459 |
| Aen           | chr7:78895853-78911209    | 8.0359   | 7.6912   | -0.0632 | 0.570275 |
| Lage3         | chrX:74351275-74353618    | 7.2334   | 6.7343   | -0.1032 | 0.466660 |
| 4930453N24Rik | chr16:64751750-64771161   | 23.8726  | 22.8442  | -0.0635 | 0.580032 |
| Scaf4         | chr16:90228956-90284425   | 9.9696   | 11.0472  | 0.1481  | 0.515489 |
| Uhrf2         | chr19:30030512-30093722   | 18.4599  | 17.9985  | -0.0365 | 0.536661 |
| Gm26792       | chr19:46335286-46338538   | 1.7271   | 1.5484   | -0.1576 | 0.401857 |
| Bcl10         | chr3:145924377-145934283  | 29.3585  | 28.1686  | -0.0597 | 0.504099 |
| Cnr2          | chr4:135895393-135920207  | 6.7405   | 6.4547   | -0.0625 | 0.425322 |
| Slc5a2        | chr7:128265656-128272430  | 2.8703   | 2.6473   | -0.1167 | 0.497813 |
| Vps26a        | chr10:62454842-62486805   | 21.4866  | 20.6672  | -0.0561 | 0.518930 |
| Fam216a       | chr5:122364579-122372364  | 9.1919   | 8.5984   | -0.0963 | 0.404163 |
| Atp6v1e1      | chr6:120795244-120822685  | 55.8621  | 53.8151  | -0.0539 | 0.514062 |
| Irgq          | chr7:24530647-24538599    | 5.0095   | 4.8177   | -0.0563 | 0.503354 |
| Tmem219       | chr7:126886170-126922917  | 9.5523   | 9.0937   | -0.0710 | 0.390220 |
| St3gal1       | chr15:67102874-67113992   | 9.7070   | 10.4056  | 0.1003  | 0.331386 |
| Gm26642       | chr1:135248560-135266443  | 3.5790   | 3.9042   | 0.1255  | 0.045058 |
| Sfrp2         | chr3:83766320-83774316    | 2.6634   | 2.3776   | -0.1638 | 0.544283 |
| Ptgrn         | chr3:101040231-101110278  | 5.1062   | 4.7441   | -0.1061 | 0.578268 |
| Ap4m1         | chr5:138172001-138178708  | 5.8709   | 5.5901   | -0.0707 | 0.418604 |
| Slc37a3       | chr6:39334769-39377707    | 8.8679   | 9.4529   | 0.0922  | 0.263403 |
| Hspa14        | chr2:3488849-3512814      | 14.1740  | 13.8280  | -0.0357 | 0.445976 |
| Gm14321       | chr2:167777466-167782569  | 4.7518   | 5.6325   | 0.2453  | 0.518245 |
| Cnpy2         | chr10:128322458-128327187 | 24.8742  | 23.5212  | -0.0807 | 0.537718 |
| Mir1896       | chr13:21445159-21445240   | 133.4067 | 123.2681 | -0.1140 | 0.462093 |
| 9130401M01Rik | chr15:58022275-58076425   | 16.3295  | 15.5442  | -0.0711 | 0.492119 |
| 9230116N13Rik | chr1:136411915-136415519  | 1.7947   | 2.0425   | 0.1866  | 0.178475 |
| Rpe           | chr1:66700830-66719805    | 20.5049  | 21.7414  | 0.0845  | 0.202749 |
| Plaa          | chr4:94567513-94603244    | 21.4908  | 20.9377  | -0.0376 | 0.477022 |
| Mob1a         | chr6:83326015-83343776    | 101.7990 | 98.2583  | -0.0511 | 0.575723 |
| Stxbp2        | chr8:3630954-3643644      | 28.4843  | 27.5563  | -0.0478 | 0.580528 |
| Abca2         | chr2:25428702-25448540    | 13.3279  | 14.4809  | 0.1197  | 0.497524 |

|                      |                           |           |           |         |          |
|----------------------|---------------------------|-----------|-----------|---------|----------|
| <i>Rapgef1</i>       | chr2:29619719-29740978    | 33.5476   | 32.8873   | -0.0287 | 0.570965 |
| <i>Slirp</i>         | chr12:87443895-87452206   | 35.0812   | 33.5577   | -0.0641 | 0.554721 |
| <i>Fry</i>           | chr5:150259929-150497752  | 6.9291    | 7.5049    | 0.1152  | 0.472452 |
| <i>Ugp2</i>          | chr11:21321137-21371201   | 12.7720   | 13.5857   | 0.0891  | 0.215001 |
| <i>Ccdc43</i>        | chr11:102684685-102697782 | 9.5599    | 9.2190    | -0.0524 | 0.286836 |
| <i>Slc25a20</i>      | chr9:108662097-108684641  | 16.2465   | 17.7239   | 0.1256  | 0.458788 |
| <i>Gch1</i>          | chr14:47153894-47189413   | 3.2083    | 3.5755    | 0.1563  | 0.355527 |
| <i>Cd200r1</i>       | chr16:44765735-44794978   | 11.6338   | 12.5252   | 0.1065  | 0.314554 |
| <i>Sele</i>          | chr1:164048233-164057677  | 2.4290    | 2.7286    | 0.1678  | 0.347391 |
| <i>Med27</i>         | chr2:29346818-29524793    | 6.7124    | 6.3657    | -0.0765 | 0.527342 |
| <i>Dhx8</i>          | chr11:101732918-101767358 | 23.6116   | 23.1087   | -0.0311 | 0.519260 |
| <i>Pskh1</i>         | chr8:105900440-105931778  | 17.4271   | 16.7569   | -0.0566 | 0.571019 |
| <i>Otub2</i>         | chr12:103388681-103406350 | 2.3055    | 2.5771    | 0.1607  | 0.386800 |
| <i>Hnrnpa0</i>       | chr13:58125878-58128556   | 55.0910   | 53.5001   | -0.0423 | 0.594761 |
| <i>6330408A02Rik</i> | chr7:13258966-13278721    | 1.7799    | 1.9103    | 0.1020  | 0.221584 |
| <i>Impg2</i>         | chr16:56204312-56273756   | 0.4243    | 0.4930    | 0.2163  | 0.385435 |
| <i>Mtfr1</i>         | chr3:19187326-19220817    | 11.1414   | 10.7985   | -0.0451 | 0.382370 |
| <i>Lrp12</i>         | chr15:39870602-39943994   | 2.9197    | 2.7375    | -0.0929 | 0.451175 |
| <i>Pprc1</i>         | chr19:46044885-46072915   | 6.6226    | 7.2771    | 0.1360  | 0.522146 |
| <i>lpp</i>           | chr4:116507548-116538243  | 5.4700    | 6.0117    | 0.1362  | 0.354044 |
| <i>BC029722</i>      | chr2:155817729-155819426  | 17.9403   | 17.1019   | -0.0690 | 0.465768 |
| <i>Trim41</i>        | chr11:48806403-48817353   | 14.3671   | 13.7931   | -0.0588 | 0.540283 |
| <i>Trafd1</i>        | chr5:121371724-121385632  | 14.5036   | 13.8915   | -0.0622 | 0.612862 |
| <i>Churc1</i>        | chr12:76765537-76783180   | 8.6003    | 9.3294    | 0.1174  | 0.428210 |
| <i>Med25</i>         | chr7:44879390-44892397    | 13.9185   | 13.4137   | -0.0533 | 0.501061 |
| <i>Map2k5</i>        | chr9:63163768-63377902    | 12.0863   | 12.9989   | 0.1050  | 0.313425 |
| <i>Diexf</i>         | chr1:193104402-193130251  | 8.4281    | 9.0058    | 0.0956  | 0.285551 |
| <i>Orc3</i>          | chr4:34570795-34614944    | 21.9899   | 23.0988   | 0.0710  | 0.182879 |
| <i>Necap1</i>        | chr6:122874556-122888934  | 13.0970   | 12.5411   | -0.0626 | 0.466578 |
| <i>Cd55</i>          | chr1:130439026-130462744  | 19.6623   | 21.4303   | 0.1242  | 0.496662 |
| <i>Mrip</i>          | chr11:59661304-59780860   | 9.0160    | 8.7686    | -0.0401 | 0.567492 |
| <i>Wdhd1</i>         | chr14:47240943-47276832   | 3.3976    | 3.6597    | 0.1072  | 0.341469 |
| <i>Mir3082</i>       | chr17:25831364-25831428   | 115.1484  | 106.0634  | -0.1186 | 0.380990 |
| <i>Gm22744</i>       | chr19:8725091-8725156     | 70.9777   | 79.8444   | 0.1698  | 0.197474 |
| <i>Ddb1</i>          | chr19:10605624-10629813   | 84.9829   | 83.2849   | -0.0291 | 0.513906 |
| <i>Alkbh1</i>        | chr12:87425839-87443839   | 17.6609   | 17.2295   | -0.0357 | 0.494946 |
| <i>Zfp384</i>        | chr6:125009144-125037870  | 6.7928    | 7.2500    | 0.0940  | 0.303243 |
| <i>Ccdc107</i>       | chr4:43492899-43495921    | 1873.7106 | 1654.7285 | -0.1793 | 0.511705 |
| <i>Cklf</i>          | chr8:104250902-104264936  | 8.9620    | 9.6686    | 0.1095  | 0.243685 |
| <i>Casc1</i>         | chr6:145174833-145210970  | 1.1164    | 1.2516    | 0.1649  | 0.381278 |
| <i>Usp35</i>         | chr7:97309379-97332020    | 2.1702    | 1.9865    | -0.1276 | 0.585890 |
| <i>1700025G04Rik</i> | chr1:151884523-152090320  | 3.6682    | 3.4890    | -0.0722 | 0.560391 |
| <i>Tmed7</i>         | chr18:46560234-46597535   | 16.5939   | 16.1564   | -0.0385 | 0.515657 |
| <i>Tmco4</i>         | chr4:138972887-139059171  | 17.7238   | 17.0573   | -0.0553 | 0.580505 |
| <i>Irs2</i>          | chr8:10986979-11008458    | 4.9606    | 6.0137    | 0.2777  | 0.482545 |
| <i>Slc25a27</i>      | chr17:43641899-43667015   | 5.9263    | 5.6433    | -0.0706 | 0.238311 |
| <i>Galk1</i>         | chr11:116008456-116012719 | 13.5658   | 12.8479   | -0.0784 | 0.481363 |
| <i>Alkbh8</i>        | chr9:3335477-3387050      | 7.6895    | 8.2590    | 0.1031  | 0.292660 |
| <i>Clpx</i>          | chr9:65294259-65330658    | 12.7619   | 13.4894   | 0.0800  | 0.116221 |
| <i>Serac1</i>        | chr17:6042195-6079741     | 2.6943    | 2.5347    | -0.0881 | 0.474975 |
| <i>Ensa</i>          | chr3:95624979-95632102    | 44.2672   | 42.9638   | -0.0431 | 0.527629 |
| <i>B230369F24Rik</i> | chr1:178313327-178318549  | 1.9394    | 1.7686    | -0.1331 | 0.266973 |
| <i>Ankrd17</i>       | chr5:90227189-90366185    | 20.4412   | 21.6350   | 0.0819  | 0.338086 |
| <i>Tmcc1</i>         | chr6:116018617-116193486  | 4.9779    | 5.3292    | 0.0984  | 0.309807 |
| <i>3010003L21Rik</i> | chr6:148944866-148947129  | 2.9268    | 2.6371    | -0.1504 | 0.504592 |
| <i>1810030O07Rik</i> | chrX:12654878-12673668    | 26.6931   | 25.6271   | -0.0588 | 0.543153 |
| <i>Piga</i>          | chrX:164419792-164433916  | 4.1663    | 4.4784    | 0.1042  | 0.274311 |
| <i>Ccs</i>           | chr19:4825365-4839322     | 35.1151   | 33.6441   | -0.0617 | 0.530018 |
| <i>Sdhc</i>          | chr1:171127164-171150603  | 15.3397   | 14.8534   | -0.0465 | 0.395144 |
| <i>Gm26852</i>       | chr7:19382219-19392718    | 4.0535    | 3.8772    | -0.0642 | 0.496530 |
| <i>Cttn3</i>         | chr8:60910388-60983300    | 8.2665    | 8.7485    | 0.0817  | 0.339268 |
| <i>Atxn7</i>         | chr14:14012490-14107296   | 16.8164   | 17.8522   | 0.0862  | 0.335671 |
| <i>Thoc6</i>         | chr17:23668613-23673882   | 9.5326    | 9.1147    | -0.0647 | 0.316933 |
| <i>Tnfrsf13b</i>     | chr11:61126754-61149372   | 14.1804   | 13.4876   | -0.0723 | 0.539623 |
| <i>Ndufa9</i>        | chr6:126821862-126849144  | 40.6560   | 38.8350   | -0.0661 | 0.573054 |
| <i>Hnrnpm</i>        | chr17:33646232-33686860   | 57.9241   | 56.2651   | -0.0419 | 0.578209 |
| <i>Gm15601</i>       | chr14:45587739-45598512   | 2.7033    | 2.9331    | 0.1177  | 0.060458 |
| <i>A430046D13Rik</i> | chr10:128499363-128504242 | 6.8239    | 7.4059    | 0.1181  | 0.253267 |
| <i>Trbv1</i>         | chr6:40891295-40891885    | 86.5560   | 82.2420   | -0.0738 | 0.525886 |
| <i>Carkd</i>         | chr8:11497505-11514960    | 13.0424   | 12.6653   | -0.0423 | 0.420040 |
| <i>Rpl39</i>         | chrX:37082519-37085402    | 136.1754  | 157.8367  | 0.2130  | 0.408357 |

|                      |                           |          |          |         |          |
|----------------------|---------------------------|----------|----------|---------|----------|
| <i>Vps18</i>         | chr2:119288739-119298453  | 6.5855   | 6.2497   | -0.0755 | 0.595816 |
| <i>Ice1</i>          | chr13:70588688-70637634   | 28.0910  | 29.7575  | 0.0831  | 0.362608 |
| <i>Ppp4r2</i>        | chr6:100833637-100868717  | 14.5630  | 14.0700  | -0.0497 | 0.518622 |
| <i>Acadsb</i>        | chr7:131410600-131446211  | 7.3505   | 7.9008   | 0.1042  | 0.357392 |
| <i>Tbc1d22a</i>      | chr15:86214458-86498503   | 15.1421  | 14.7278  | -0.0400 | 0.402533 |
| <i>Mipep</i>         | chr14:60784565-60903610   | 6.7688   | 6.4283   | -0.0745 | 0.430297 |
| <i>Mgat4a</i>        | chr1:37439339-37541016    | 11.7439  | 11.4494  | -0.0366 | 0.521885 |
| <i>Ccbl1</i>         | chr2:30185123-30205847    | 6.0342   | 5.7605   | -0.0670 | 0.394501 |
| <i>Fbxo10</i>        | chr4:45034246-45084604    | 1.3955   | 1.2864   | -0.1174 | 0.351961 |
| <i>Fktn</i>          | chr4:53713997-53765785    | 3.0204   | 3.2682   | 0.1137  | 0.309416 |
| <i>Son</i>           | chr16:91647505-91679221   | 87.0936  | 91.5389  | 0.0718  | 0.306395 |
| <i>Micu3</i>         | chr8:40307457-40386308    | 2.9533   | 3.2391   | 0.1333  | 0.436222 |
| <i>Rin1</i>          | chr7:28788968-28798963    | 80.8454  | 78.9467  | -0.0343 | 0.600999 |
| <i>Gdi1</i>          | chrX:74304997-74311862    | 35.1472  | 34.1784  | -0.0403 | 0.599607 |
| <i>Gm26749</i>       | chr17:74575380-74617119   | 28.6186  | 27.5655  | -0.0541 | 0.591469 |
| <i>Mtpap</i>         | chr18:4375591-4397330     | 21.5245  | 22.8973  | 0.0892  | 0.312387 |
| <i>Tor1a</i>         | chr2:30960626-30967933    | 20.5801  | 19.8750  | -0.0503 | 0.461149 |
| <i>Lrig2</i>         | chr3:104453983-104511856  | 10.4246  | 10.1336  | -0.0409 | 0.522370 |
| <i>Uqcrb</i>         | chr13:66900616-66905378   | 15.1142  | 16.6303  | 0.1379  | 0.404113 |
| <i>Matk</i>          | chr10:81252934-81263365   | 9.8799   | 10.7554  | 0.1225  | 0.508473 |
| <i>Zfp759</i>        | chr13:67128227-67141787   | 6.2599   | 6.7508   | 0.1089  | 0.342818 |
| <i>Krtcap3</i>       | chr5:31251690-31253202    | 11.9342  | 13.3609  | 0.1629  | 0.493862 |
| <i>Mrps18c</i>       | chr5:100798626-100804471  | 17.0152  | 18.6335  | 0.1311  | 0.426510 |
| <i>Lsm3</i>          | chr6:91515927-91522625    | 24.9112  | 23.2912  | -0.0970 | 0.561522 |
| <i>Mapk3</i>         | chr7:126759600-126765819  | 10.4853  | 10.0270  | -0.0645 | 0.467936 |
| <i>Orc6</i>          | chr8:85299631-85308278    | 9.2909   | 8.7092   | -0.0933 | 0.479143 |
| <i>Zfx</i>           | chrX:94074630-94123702    | 13.6859  | 14.4873  | 0.0821  | 0.278723 |
| <i>Plec</i>          | chr15:76170973-76232574   | 58.7804  | 55.8835  | -0.0729 | 0.661819 |
| <i>Naa30</i>         | chr14:49172225-49191031   | 18.9172  | 18.3951  | -0.0404 | 0.571779 |
| <i>Tcp1</i>          | chr17:12915700-12925067   | 56.1147  | 54.1402  | -0.0517 | 0.579391 |
| <i>Rpl22l1</i>       | chr3:28805435-28807352    | 74.2956  | 87.1043  | 0.2295  | 0.450566 |
| <i>Il6st</i>         | chr13:112475007-112506860 | 88.9376  | 94.5502  | 0.0883  | 0.418791 |
| <i>Bbx</i>           | chr16:50191843-50432390   | 9.2738   | 9.7546   | 0.0729  | 0.233095 |
| <i>Ercc3</i>         | chr18:32240299-32270151   | 18.1508  | 19.3088  | 0.0892  | 0.262254 |
| <i>Dennd2c</i>       | chr3:103102603-103169769  | 1.3179   | 1.2097   | -0.1236 | 0.514444 |
| <i>Ube2j1</i>        | chr4:33031415-33052363    | 47.8104  | 46.0047  | -0.0555 | 0.574712 |
| <i>Usp48</i>         | chr4:137593754-137658537  | 19.2646  | 20.2729  | 0.0736  | 0.285469 |
| <i>Fbxo22</i>        | chr9:55208924-55224433    | 20.1998  | 19.4806  | -0.0523 | 0.514390 |
| <i>Lsm2</i>          | chr17:34981861-34985891   | 5.5112   | 5.2468   | -0.0709 | 0.422680 |
| <i>Apex1</i>         | chr14:50924967-50927139   | 36.1348  | 34.5393  | -0.0652 | 0.543109 |
| <i>Xpa</i>           | chr4:46155346-46196311    | 18.7743  | 19.9531  | 0.0879  | 0.173094 |
| <i>Gm26602</i>       | chr10:79910855-79911140   | 49.0054  | 46.6473  | -0.0711 | 0.211425 |
| <i>Nsd1</i>          | chr13:55209781-55318325   | 47.5048  | 50.0074  | 0.0741  | 0.302115 |
| <i>Atg16l2</i>       | chr7:101289391-101302251  | 14.9513  | 14.5337  | -0.0409 | 0.500650 |
| <i>Cep68</i>         | chr11:20227036-20249429   | 17.1135  | 16.7619  | -0.0300 | 0.503094 |
| <i>Gm23973</i>       | chr7:103271549-103271870  | 15.1601  | 13.4748  | -0.1700 | 0.456752 |
| <i>1110038B12Rik</i> | chr17:34950237-34952471   | 6.1886   | 6.7544   | 0.1262  | 0.244226 |
| <i>Lzic</i>          | chr4:149485228-149496668  | 9.9997   | 9.5375   | -0.0683 | 0.325857 |
| <i>Mrpl17</i>        | chr7:105806657-105811099  | 6.3150   | 6.7324   | 0.0923  | 0.156472 |
| <i>Ripk2</i>         | chr4:16122732-16163647    | 10.4737  | 11.1990  | 0.0966  | 0.304185 |
| <i>Jag2</i>          | chr12:112908589-112929495 | 1.8561   | 1.7281   | -0.1031 | 0.382181 |
| <i>Pde7a</i>         | chr3:19223107-19311322    | 17.8648  | 19.0177  | 0.0902  | 0.408909 |
| <i>Fxyd5</i>         | chr7:31032721-31042481    | 130.0087 | 125.0255 | -0.0564 | 0.613105 |
| <i>Med26</i>         | chr8:72494557-72548310    | 6.7948   | 7.3534   | 0.1140  | 0.344203 |
| <i>Mrps6</i>         | chr16:92058269-92112227   | 8.4969   | 9.2109   | 0.1164  | 0.251948 |
| <i>Zfp81</i>         | chr17:33329341-33358878   | 5.1179   | 5.5055   | 0.1053  | 0.396050 |
| <i>Rtel1</i>         | chr2:181319738-181356616  | 19.4535  | 18.9356  | -0.0389 | 0.611280 |
| <i>Rab5b</i>         | chr10:128677192-128696268 | 15.3637  | 14.7759  | -0.0563 | 0.522719 |
| <i>Psmo1</i>         | chr7:114264605-114276118  | 46.1736  | 44.1288  | -0.0653 | 0.576808 |
| <i>Raver1</i>        | chr9:21074167-21091988    | 16.2836  | 17.7259  | 0.1224  | 0.486069 |
| <i>Fastkd2</i>       | chr1:63730613-63754655    | 6.0142   | 5.7354   | -0.0685 | 0.539149 |
| <i>B4galt3</i>       | chr1:171270327-171276896  | 8.5391   | 8.2350   | -0.0523 | 0.554047 |
| <i>Rmnd1</i>         | chr10:4401914-4432388     | 8.3979   | 8.1299   | -0.0468 | 0.483533 |
| <i>Ccdc125</i>       | chr13:100669480-100697240 | 16.4670  | 15.9516  | -0.0459 | 0.396027 |
| <i>Igfbp1</i>        | chrX:100494290-100516125  | 20.6480  | 19.8675  | -0.0556 | 0.563754 |
| <i>mmu-mir-3061</i>  | chr11:52124529-52127779   | 7.8164   | 8.4389   | 0.1105  | 0.356701 |
| <i>Ndufa12</i>       | chr10:94198954-94221443   | 13.1105  | 12.0781  | -0.1183 | 0.553236 |
| <i>Usp15</i>         | chr10:123113243-123196935 | 43.0071  | 45.3296  | 0.0759  | 0.288071 |
| <i>9930021J03Rik</i> | chr19:29714401-29806009   | 9.1963   | 8.9812   | -0.0341 | 0.474525 |
| <i>Zfp518a</i>       | chr19:40894704-40917947   | 22.5680  | 21.9780  | -0.0382 | 0.544851 |
| <i>Snord47</i>       | chr1:161038081-161038158  | 66.5446  | 74.6415  | 0.1657  | 0.270843 |

|                      |                           |           |           |         |          |
|----------------------|---------------------------|-----------|-----------|---------|----------|
| <i>Dnajc9</i>        | chr14:20384637-20388910   | 52.6097   | 50.1837   | -0.0681 | 0.577459 |
| <i>Abcc1</i>         | chr16:14361557-14475737   | 6.3753    | 6.8234    | 0.0980  | 0.417349 |
| <i>E030030I06Rik</i> | chr10:22113049-22148823   | 2.5250    | 2.2997    | -0.1348 | 0.503772 |
| <i>Gm23130</i>       | chr10:23786469-23786543   | 66.5269   | 74.0731   | 0.1550  | 0.051302 |
| <i>Tmem5</i>         | chr10:122078113-122097371 | 3.6581    | 3.9420    | 0.1078  | 0.303353 |
| <i>Gm12000</i>       | chr11:11695132-11696439   | 33.4773   | 36.3508   | 0.1188  | 0.400700 |
| <i>Gm11423</i>       | chr11:82779600-82781042   | 6.9354    | 6.3993    | -0.1161 | 0.276524 |
| <i>Al662270</i>      | chr11:83223575-83226604   | 66.0201   | 63.1257   | -0.0647 | 0.573024 |
| <i>Becn1</i>         | chr11:101285951-101302286 | 24.9922   | 24.4689   | -0.0305 | 0.488486 |
| <i>Armc7</i>         | chr11:115475666-115490467 | 32.6786   | 31.6884   | -0.0444 | 0.563717 |
| <i>Gpr68</i>         | chr12:100876681-100908198 | 9.3931    | 11.3444   | 0.2723  | 0.472760 |
| <i>Polk</i>          | chr13:96480688-96542485   | 6.6431    | 7.1225    | 0.1005  | 0.334074 |
| <i>Mrps27</i>        | chr13:99344785-99415561   | 6.9268    | 7.5288    | 0.1202  | 0.272375 |
| <i>Taok3</i>         | chr5:117120128-117275219  | 7.6474    | 8.0656    | 0.0768  | 0.260807 |
| <i>Rita1</i>         | chr5:120594304-120612589  | 1.6312    | 1.4823    | -0.1381 | 0.356186 |
| <i>Snrnp35</i>       | chr5:124483133-124491124  | 3.1937    | 3.6362    | 0.1872  | 0.290940 |
| <i>Bpgm</i>          | chr6:34476206-34505613    | 9.3837    | 10.0305   | 0.0962  | 0.346638 |
| <i>Gm4070</i>        | chr7:105895138-105953967  | 0.5532    | 0.6566    | 0.2471  | 0.554183 |
| <i>Hras</i>          | chr7:141189104-141194005  | 8.1729    | 7.8680    | -0.0549 | 0.433089 |
| <i>Glg1</i>          | chr8:111154420-111259216  | 28.0963   | 29.9300   | 0.0912  | 0.442429 |
| <i>Ccdc84</i>        | chr9:44410159-44418003    | 19.9152   | 21.3894   | 0.1030  | 0.315090 |
| <i>Wdr6</i>          | chr9:108572312-108578670  | 22.9052   | 22.3666   | -0.0343 | 0.494794 |
| <i>Dcaf13</i>        | chr15:39112873-39146856   | 44.4190   | 42.8932   | -0.0504 | 0.522189 |
| <i>L3mbtl2</i>       | chr15:81663888-81688315   | 8.7008    | 8.4750    | -0.0379 | 0.383212 |
| <i>Gm6904</i>        | chr14:59244440-59260216   | 4.5722    | 5.1988    | 0.1853  | 0.315666 |
| <i>Mapk8ip3</i>      | chr17:24892152-24936977   | 18.7287   | 19.8558   | 0.0843  | 0.389089 |
| <i>Ager</i>          | chr17:34597861-34600934   | 3.6255    | 4.0358    | 0.1547  | 0.300160 |
| <i>Abhd10</i>        | chr16:45729724-45742955   | 4.6957    | 5.0660    | 0.1095  | 0.300713 |
| <i>Gm15342</i>       | chr16:96036089-96038743   | 7.3193    | 6.9381    | -0.0772 | 0.416667 |
| <i>Trim8</i>         | chr19:46501647-46516444   | 21.5542   | 23.2696   | 0.1105  | 0.454003 |
| <i>Bcs1l</i>         | chr1:74588288-74592443    | 6.2118    | 6.7063    | 0.1105  | 0.160404 |
| <i>1700026D11Rik</i> | chr2:132490633-132524057  | 1.5802    | 1.3820    | -0.1934 | 0.512556 |
| <i>Fam46c</i>        | chr3:100451627-100489324  | 27.7883   | 29.8544   | 0.1035  | 0.466902 |
| <i>Wdtdc1</i>        | chr4:133292458-133353481  | 6.4521    | 6.2358    | -0.0492 | 0.449434 |
| <i>Stard9</i>        | chr2:120629125-120731897  | 1.2137    | 1.3221    | 0.1235  | 0.428097 |
| <i>Ap2a1</i>         | chr7:44900372-44929496    | 15.9069   | 15.3887   | -0.0478 | 0.597497 |
| <i>Epb4.1l2</i>      | chr10:25359797-25523519   | 18.3525   | 19.6662   | 0.0997  | 0.379029 |
| <i>Zfp354c</i>       | chr11:50811085-50827724   | 2.8991    | 2.7289    | -0.0873 | 0.519311 |
| <i>Coa3</i>          | chr11:101277967-101279114 | 31.9283   | 29.9511   | -0.0922 | 0.567867 |
| <i>Pde4d</i>         | chr13:108449947-109953461 | 4.9743    | 5.3061    | 0.0932  | 0.338540 |
| <i>Gm26779</i>       | chr5:109886230-109891137  | 8.8436    | 8.0691    | -0.1322 | 0.275609 |
| <i>Get4</i>          | chr5:139252323-139270051  | 8.5458    | 8.1559    | -0.0674 | 0.502096 |
| <i>Slc12a4</i>       | chr8:105943589-105966115  | 3.7525    | 4.1615    | 0.1493  | 0.490228 |
| <i>Cox6c</i>         | chr15:35925885-35938246   | 20.2455   | 21.7661   | 0.1045  | 0.422101 |
| <i>Hist1h2bg</i>     | chr13:23571395-23572013   | 17.8250   | 20.0223   | 0.1677  | 0.517013 |
| <i>Tmem120a</i>      | chr5:135735484-135744271  | 9.4918    | 10.2253   | 0.1074  | 0.182564 |
| <i>Dnajc15</i>       | chr14:77826216-77874917   | 61.0209   | 56.4686   | -0.1119 | 0.596636 |
| <i>Epb4.1l4a</i>     | chr18:33796326-34007206   | 1.2054    | 1.0999    | -0.1322 | 0.200251 |
| <i>Gm22009</i>       | chr3:69085104-69085447    | 4178.8772 | 3940.9301 | -0.0846 | 0.634243 |
| <i>1500002C15Rik</i> | chr4:155732547-155734627  | 13.6277   | 13.0791   | -0.0593 | 0.465837 |
| <i>St3gal3</i>       | chr4:117932153-118134914  | 2.4224    | 2.2303    | -0.1192 | 0.427160 |
| <i>Cd37</i>          | chr7:45233631-45239115    | 42.4467   | 41.3848   | -0.0366 | 0.617208 |
| <i>Trmt13</i>        | chr3:116581092-116614587  | 10.0646   | 10.6029   | 0.0752  | 0.103536 |
| <i>Tmf1</i>          | chr6:97155265-97179124    | 44.5959   | 43.4475   | -0.0376 | 0.549609 |
| <i>Arid4a</i>        | chr12:71015989-71098592   | 44.4311   | 47.0130   | 0.0815  | 0.336579 |
| <i>Man1c1</i>        | chr4:134561689-134704290  | 1.5072    | 1.6797    | 0.1563  | 0.418187 |
| <i>Eif2ak4</i>       | chr2:118388617-118475234  | 4.3544    | 4.6468    | 0.0938  | 0.305587 |
| <i>Foxj2</i>         | chr6:122819913-122845366  | 7.7661    | 8.4083    | 0.1146  | 0.459037 |
| <i>Nacc1</i>         | chr8:84670482-84687862    | 11.3444   | 10.9538   | -0.0505 | 0.588931 |
| <i>Zxdb</i>          | chrX:94724568-94730191    | 2.3080    | 2.5232    | 0.1286  | 0.404449 |
| <i>Isca2</i>         | chr12:84773269-84775089   | 29.4499   | 28.1365   | -0.0658 | 0.496073 |
| <i>Bod1l</i>         | chr5:41787541-41844168    | 35.1924   | 36.9239   | 0.0693  | 0.275267 |
| <i>Mios</i>          | chr6:8209221-8236274      | 8.7732    | 9.2448    | 0.0755  | 0.164233 |
| <i>Ppp5c</i>         | chr7:17004639-17027924    | 19.3802   | 18.8089   | -0.0432 | 0.525683 |
| <i>Oaz2</i>          | chr9:65668000-65690300    | 4.0089    | 3.7260    | -0.1056 | 0.516097 |
| <i>3110052M02Rik</i> | chr17:21657581-21662540   | 6.9440    | 6.3816    | -0.1218 | 0.527386 |
| <i>Tbc1d22b</i>      | chr17:29549787-29606895   | 14.0077   | 14.9922   | 0.0980  | 0.381634 |
| <i>Hist2h2ab</i>     | chr3:96219864-96220308    | 12.7021   | 11.4491   | -0.1498 | 0.486115 |
| <i>Akna</i>          | chr4:63367124-63403354    | 75.6777   | 81.9668   | 0.1152  | 0.530519 |
| <i>B230319C09Rik</i> | chr6:83441754-83448322    | 3.8279    | 4.3005    | 0.1679  | 0.484586 |
| <i>Rhot2</i>         | chr17:25838456-25844851   | 18.0802   | 17.6122   | -0.0378 | 0.550695 |



|                      |                           |          |          |         |          |
|----------------------|---------------------------|----------|----------|---------|----------|
| <i>Foxp4</i>         | chr17:47867132-47924645   | 3.5268   | 3.9552   | 0.1654  | 0.515463 |
| <i>Nr2c2ap</i>       | chr8:70131332-70133739    | 19.0507  | 18.2153  | -0.0647 | 0.528028 |
| <i>Abr</i>           | chr11:76416733-76622314   | 14.6755  | 14.2841  | -0.0390 | 0.609600 |
| <i>Ahi1</i>          | chr10:20952546-21080428   | 4.2733   | 4.6829   | 0.1321  | 0.494592 |
| <i>Lppr3</i>         | chr10:79860474-79874634   | 7.4500   | 7.2168   | -0.0459 | 0.404997 |
| <i>Tbc1d9b</i>       | chr11:50131395-50172785   | 17.3476  | 16.8092  | -0.0455 | 0.630873 |
| <i>Pthr2</i>         | chr11:86683984-86692457   | 8.5727   | 9.1780   | 0.0984  | 0.297120 |
| <i>Msi2</i>          | chr11:88339381-88718513   | 13.8318  | 14.6904  | 0.0869  | 0.399369 |
| <i>Ubtf</i>          | chr11:102304559-102319742 | 42.7425  | 41.8939  | -0.0289 | 0.553236 |
| <i>L2hgdh</i>        | chr12:69690435-69724874   | 2.7543   | 2.5590   | -0.1061 | 0.510991 |
| <i>Tmem156</i>       | chr5:65063207-65091555    | 24.7803  | 23.6708  | -0.0661 | 0.405466 |
| <i>N4bp2</i>         | chr5:65763520-65830108    | 9.9637   | 10.6345  | 0.0940  | 0.401001 |
| <i>Smyd5</i>         | chr6:85431988-85446435    | 9.6973   | 10.3279  | 0.0909  | 0.232523 |
| <i>Anapc15</i>       | chr7:101881324-101901845  | 4.8702   | 4.6592   | -0.0639 | 0.410108 |
| <i>Afg3l1</i>        | chr8:123477902-123503916  | 7.4033   | 7.8714   | 0.0885  | 0.173699 |
| <i>Cers5</i>         | chr15:99733505-99772885   | 19.4601  | 19.0580  | -0.0301 | 0.440908 |
| <i>Tfg</i>           | chr16:56690331-56717450   | 14.5945  | 14.0802  | -0.0518 | 0.539355 |
| <i>Samsn1</i>        | chr16:75858792-76022270   | 10.8904  | 11.9027  | 0.1282  | 0.548046 |
| <i>Prdx6</i>         | chr1:161240111-161251219  | 35.0777  | 33.7895  | -0.0540 | 0.576622 |
| <i>Fbxo18</i>        | chr2:11742572-11777582    | 15.7164  | 15.2030  | -0.0479 | 0.613938 |
| <i>Man1b1</i>        | chr2:25332337-25352212    | 17.5981  | 17.0258  | -0.0477 | 0.586836 |
| <i>Metap1d</i>       | chr2:71453275-71525194    | 11.4037  | 11.0623  | -0.0438 | 0.442079 |
| <i>Nipsnap3b</i>     | chr4:53011879-53022060    | 18.4273  | 17.6368  | -0.0633 | 0.514364 |
| <i>Tnfrsf18</i>      | chr4:156026163-156028895  | 42.7011  | 40.8611  | -0.0635 | 0.615494 |
| <i>Sumo1</i>         | chr1:59639433-59670834    | 15.0992  | 16.3454  | 0.1144  | 0.426889 |
| <i>Esf1</i>          | chr2:140119882-140170564  | 10.9263  | 11.6570  | 0.0934  | 0.359349 |
| <i>Tmem19</i>        | chr10:115340738-115362262 | 13.1063  | 12.7519  | -0.0395 | 0.342547 |
| <i>Lemd3</i>         | chr10:120923412-120979332 | 14.8563  | 15.6092  | 0.0713  | 0.158344 |
| <i>Asb3</i>          | chr11:30954394-31102704   | 7.4965   | 7.2201   | -0.0542 | 0.490215 |
| <i>Cox10</i>         | chr11:63962626-64079468   | 9.2006   | 8.8920   | -0.0492 | 0.358553 |
| <i>Tmem14c</i>       | chr13:41016249-41022575   | 39.8193  | 38.4032  | -0.0522 | 0.460151 |
| <i>Arl10</i>         | chr13:54575014-54581128   | 3.1608   | 2.7967   | -0.1766 | 0.596304 |
| <i>Ctsl</i>          | chr13:64363213-64370306   | 5.1645   | 4.7934   | -0.1076 | 0.513914 |
| <i>Dmtf1</i>         | chr5:9118800-9161749      | 48.0050  | 50.3869  | 0.0699  | 0.260033 |
| <i>Sdad1</i>         | chr5:92284009-92310024    | 20.9445  | 20.5078  | -0.0304 | 0.520571 |
| <i>Atp2a2</i>        | chr5:122442701-122502225  | 27.3042  | 28.6878  | 0.0713  | 0.265351 |
| <i>Tsc22d4</i>       | chr5:137745729-137768450  | 16.9547  | 16.5235  | -0.0372 | 0.607838 |
| <i>Cnpy4</i>         | chr5:138187484-138193918  | 10.4621  | 10.0258  | -0.0615 | 0.497016 |
| <i>Klhl35</i>        | chr7:99466003-99474022    | 2.2334   | 2.0479   | -0.1251 | 0.467971 |
| <i>Dhx32</i>         | chr7:133720941-133782726  | 7.5674   | 7.2469   | -0.0624 | 0.524503 |
| <i>Bag4</i>          | chr8:25764537-25785209    | 8.5252   | 9.0361   | 0.0840  | 0.255174 |
| <i>Gm16845</i>       | chr9:22071031-22086122    | 7.3100   | 6.9059   | -0.0821 | 0.288897 |
| <i>Prrg1</i>         | chrX:78449612-78583896    | 1.5776   | 1.4690   | -0.1029 | 0.613045 |
| <i>Ttc21b</i>        | chr2:66184326-66256617    | 3.2164   | 3.0714   | -0.0665 | 0.523919 |
| <i>Ola1</i>          | chr2:73092800-73218924    | 16.1808  | 15.4396  | -0.0676 | 0.571789 |
| <i>Sqrdl</i>         | chr2:122765236-122809569  | 2.6563   | 2.9808   | 0.1663  | 0.491607 |
| <i>Ostc</i>          | chr3:130695920-130709444  | 60.5571  | 57.7399  | -0.0687 | 0.590382 |
| <i>Ascc2</i>         | chr11:4637746-4685699     | 10.3569  | 11.0122  | 0.0885  | 0.283202 |
| <i>Cd3d</i>          | chr9:44981792-44987052    | 191.9726 | 202.9767 | 0.0804  | 0.318221 |
| <i>Abcf1</i>         | chr17:35956818-35969761   | 35.9467  | 35.2182  | -0.0295 | 0.505714 |
| <i>Luc7l3</i>        | chr11:94287889-94321988   | 56.6372  | 55.2390  | -0.0361 | 0.602840 |
| <i>Lrig1</i>         | chr6:94604528-94700158    | 16.6751  | 16.0743  | -0.0529 | 0.611647 |
| <i>Jagn1</i>         | chr6:113442568-113448229  | 15.0857  | 14.4155  | -0.0656 | 0.361577 |
| <i>Numbl</i>         | chr7:27258432-27282144    | 0.4493   | 0.5158   | 0.1989  | 0.400692 |
| <i>Bricd5</i>        | chr17:24473883-24475469   | 10.9303  | 10.3100  | -0.0843 | 0.441127 |
| <i>Zfp101</i>        | chr17:33360506-33394641   | 5.4183   | 5.1662   | -0.0687 | 0.592565 |
| <i>Uqcrfs1</i>       | chr13:30540307-30545362   | 46.2689  | 44.3536  | -0.0610 | 0.566369 |
| <i>AA474408</i>      | chr7:110057986-110061325  | 2.6969   | 2.9601   | 0.1344  | 0.348378 |
| <i>Eif3m</i>         | chr2:104999655-105017080  | 43.5404  | 41.5155  | -0.0687 | 0.595923 |
| <i>4921531C22Rik</i> | chr2:179975992-179979013  | 4.5159   | 4.9439   | 0.1306  | 0.200698 |
| <i>Setd7</i>         | chr3:51515318-51560878    | 22.8998  | 22.3550  | -0.0347 | 0.611687 |
| <i>Phf11a</i>        | chr14:59276912-59297522   | 2.7217   | 3.1933   | 0.2305  | 0.509451 |
| <i>Psat1</i>         | chr19:15904677-15947337   | 9.0952   | 8.7701   | -0.0525 | 0.493130 |
| <i>Supv3l1</i>       | chr10:62429208-62449738   | 13.4695  | 12.9177  | -0.0603 | 0.584144 |
| <i>Oaz1</i>          | chr10:80826655-80829290   | 10.8040  | 11.6105  | 0.1039  | 0.332941 |
| <i>Ap1b1</i>         | chr11:4986823-5042791     | 33.4964  | 32.6865  | -0.0353 | 0.614731 |
| <i>Tefm</i>          | chr11:80136677-80142175   | 4.4527   | 4.0283   | -0.1445 | 0.529387 |
| <i>Tmc6</i>          | chr11:117765987-117782198 | 43.6969  | 42.5482  | -0.0384 | 0.642907 |
| <i>Brd9</i>          | chr13:73937837-73960894   | 36.9630  | 36.0797  | -0.0349 | 0.496067 |
| <i>Atg10</i>         | chr13:90935348-91223987   | 3.8997   | 4.4011   | 0.1745  | 0.444700 |
| <i>Serbp1</i>        | chr6:67266978-67289302    | 87.1944  | 84.1828  | -0.0507 | 0.603694 |

|                      |                           |          |          |         |          |
|----------------------|---------------------------|----------|----------|---------|----------|
| <i>Gm15884</i>       | chr6:124715572-124718831  | 30.8671  | 29.2355  | -0.0784 | 0.487924 |
| <i>Cdc16</i>         | chr8:13757675-13781938    | 22.2973  | 21.7298  | -0.0372 | 0.446259 |
| <i>Ofd1</i>          | chrX:166390032-166440704  | 11.3996  | 12.0230  | 0.0768  | 0.210074 |
| <i>Eif1</i>          | chr14:79481193-79582476   | 99.5611  | 97.3947  | -0.0317 | 0.572612 |
| <i>Zfand3</i>        | chr17:30005086-30210019   | 22.3417  | 21.7367  | -0.0396 | 0.467966 |
| <i>Arpc2</i>         | chr1:74236496-74268209    | 207.1229 | 198.8416 | -0.0589 | 0.616282 |
| <i>Kdsr</i>          | chr1:106720409-106759742  | 8.3290   | 8.8262   | 0.0837  | 0.293683 |
| <i>Dph6</i>          | chr2:114516415-114654964  | 2.9471   | 3.1642   | 0.1025  | 0.274349 |
| <i>Pigu</i>          | chr2:155278242-155357430  | 2.7176   | 2.9246   | 0.1059  | 0.369862 |
| <i>Tex10</i>         | chr4:48430857-48473459    | 18.1934  | 17.7437  | -0.0361 | 0.489414 |
| <i>3110040N11Rik</i> | chr7:81782181-81789478    | 13.6873  | 13.0200  | -0.0721 | 0.447216 |
| <i>Gpr89</i>         | chr3:96868280-96905346    | 4.6059   | 4.9656   | 0.1085  | 0.388942 |
| <i>Ric8b</i>         | chr10:84917615-85016446   | 10.4842  | 11.1725  | 0.0917  | 0.277379 |
| <i>Rbak</i>          | chr5:143172185-143180775  | 8.6565   | 9.2544   | 0.0964  | 0.309335 |
| <i>Bace1</i>         | chr9:45838579-45864399    | 4.7694   | 5.1440   | 0.1091  | 0.411151 |
| <i>Zfand5</i>        | chr19:21272277-21282289   | 11.1551  | 11.7862  | 0.0794  | 0.289686 |
| <i>Trbv14</i>        | chr6:41135166-41135609    | 22.5788  | 24.7233  | 0.1309  | 0.136948 |
| <i>Zfp579</i>        | chr7:4983482-4996158      | 1.5090   | 1.3987   | -0.1095 | 0.358924 |
| <i>Akap8</i>         | chr17:32303675-32321153   | 103.0398 | 101.4404 | -0.0226 | 0.584576 |
| <i>Nhp211</i>        | chr15:82041318-82047598   | 5.4011   | 5.0610   | -0.0938 | 0.519538 |
| <i>Tpd52</i>         | chr3:8928625-9004723      | 4.1647   | 4.5862   | 0.1391  | 0.442798 |
| <i>Irf9</i>          | chr14:55603570-55610030   | 54.1294  | 57.5013  | 0.0872  | 0.425617 |
| <i>Vmn2r97</i>       | chr17:18914321-18948071   | 1.6205   | 1.8511   | 0.1919  | 0.399851 |
| <i>Zfp369</i>        | chr13:65278813-65304221   | 10.7937  | 11.5243  | 0.0945  | 0.431320 |
| <i>Ppp1r16a</i>      | chr15:76671614-76694919   | 3.7030   | 3.4643   | -0.0962 | 0.591972 |
| <i>Gmfb</i>          | chr14:46808148-46822242   | 53.8973  | 52.1651  | -0.0471 | 0.618112 |
| <i>Ypel1</i>         | chr16:17069695-17087045   | 5.5959   | 5.3965   | -0.0523 | 0.490926 |
| <i>Cdc42bpg</i>      | chr19:6306455-6325652     | 1.3149   | 1.2202   | -0.1078 | 0.541492 |
| <i>Vmn2r84</i>       | chr10:130385315-130394241 | 1.9113   | 2.1566   | 0.1742  | 0.404174 |
| <i>Prpsap2</i>       | chr11:61729649-61762088   | 9.4431   | 10.1689  | 0.1068  | 0.321977 |
| <i>Aatf</i>          | chr11:84422854-84513522   | 22.2229  | 21.7109  | -0.0336 | 0.415309 |
| <i>Smarce1</i>       | chr11:99209046-99231017   | 9.3021   | 9.0751   | -0.0356 | 0.440465 |
| <i>Myl4</i>          | chr11:104550662-104595753 | 0.9965   | 0.8917   | -0.1604 | 0.456594 |
| <i>Dhrs7</i>         | chr12:72650355-72664828   | 17.6978  | 16.7330  | -0.0809 | 0.559669 |
| <i>Zscan12</i>       | chr13:21362826-21369824   | 7.7192   | 8.2914   | 0.1032  | 0.303170 |
| <i>Pelo</i>          | chr13:115088356-115090188 | 5.9643   | 5.6202   | -0.0857 | 0.356389 |
| <i>Picalm</i>        | chr7:90130231-90209447    | 77.6346  | 81.5806  | 0.0715  | 0.294544 |
| <i>Trim34b</i>       | chr7:104300229-104336909  | 8.8940   | 9.6140   | 0.1123  | 0.349128 |
| <i>Ccdc82</i>        | chr9:13246981-13289409    | 47.3053  | 46.0824  | -0.0378 | 0.501670 |
| <i>Sik2</i>          | chr9:50892800-51009073    | 4.9472   | 5.2596   | 0.0883  | 0.337602 |
| <i>Nme6</i>          | chr9:109832748-109843116  | 2.1195   | 1.9112   | -0.1492 | 0.474820 |
| <i>Psme2</i>         | chr14:55587440-55591113   | 32.9953  | 35.3107  | 0.0978  | 0.401216 |
| <i>C920025E04Rik</i> | chr17:36109233-36111658   | 8.2539   | 9.1010   | 0.1409  | 0.322046 |
| <i>Mta2</i>          | chr19:8941874-8952303     | 81.1638  | 79.5891  | -0.0283 | 0.560615 |
| <i>Idh1</i>          | chr1:65158615-65186479    | 6.0520   | 5.7366   | -0.0772 | 0.424545 |
| <i>Lman1</i>         | chr18:65980753-66022580   | 6.3474   | 6.1308   | -0.0501 | 0.526319 |
| <i>Fam69b</i>        | chr2:26628456-26636497    | 2.4568   | 2.7790   | 0.1778  | 0.437351 |
| <i>Atp5g3</i>        | chr2:73908446-73911326    | 33.7259  | 32.5585  | -0.0508 | 0.563705 |
| <i>Psmf1</i>         | chr2:151715811-151744186  | 6.4341   | 6.8282   | 0.0858  | 0.247076 |
| <i>Lsm14b</i>        | chr2:180024986-180035465  | 19.6399  | 18.9281  | -0.0533 | 0.603772 |
| <i>1810022K09Rik</i> | chr3:14606319-14611221    | 48.4081  | 44.9492  | -0.1070 | 0.590912 |
| <i>Kcna2</i>         | chr3:107101566-107106879  | 1.3214   | 1.1986   | -0.1407 | 0.445464 |
| <i>Macf1</i>         | chr4:123349632-123684360  | 197.5535 | 191.5320 | -0.0447 | 0.657889 |
| <i>Xlr3b</i>         | chrX:73192206-73202930    | 1.5494   | 0.7907   | -0.9706 | 0.459249 |
| <i>Rint1</i>         | chr5:23787710-23820369    | 7.5503   | 7.3057   | -0.0475 | 0.585597 |
| <i>Mfap3</i>         | chr11:57518663-57533815   | 13.2776  | 12.9966  | -0.0309 | 0.487018 |
| <i>Kbtbd3</i>        | chr9:4309742-4331721      | 3.6539   | 3.9942   | 0.1285  | 0.176566 |
| <i>Gm21844</i>       | chr19:4801511-4805784     | 12.1988  | 13.4893  | 0.1451  | 0.344535 |
| <i>Ythdf1</i>        | chr2:180904376-180920949  | 23.4827  | 22.8414  | -0.0399 | 0.622479 |
| <i>Aarsd1</i>        | chr11:101406838-101417615 | 10.2535  | 9.8607   | -0.0563 | 0.403202 |
| <i>Cd7</i>           | chr11:121036746-121039418 | 32.3109  | 30.5739  | -0.0797 | 0.619121 |
| <i>Ube2a</i>         | chrX:36874357-36884215    | 14.7969  | 15.7414  | 0.0893  | 0.098373 |
| <i>Med19</i>         | chr2:84678401-84688215    | 15.5446  | 16.5166  | 0.0875  | 0.235777 |
| <i>Slc25a39</i>      | chr11:102402984-102407946 | 10.7708  | 10.2318  | -0.0741 | 0.596971 |
| <i>Rmi1</i>          | chr13:58402596-58411149   | 3.3299   | 3.1369   | -0.0861 | 0.458291 |
| <i>Prkag2</i>        | chr5:24862743-25100642    | 5.8959   | 6.2930   | 0.0940  | 0.359970 |
| <i>Cnbp</i>          | chr6:87842614-87851106    | 139.4684 | 148.4617 | 0.0902  | 0.402943 |
| <i>Alg11</i>         | chr8:22060720-22071627    | 11.2817  | 10.9744  | -0.0398 | 0.475181 |
| <i>Tk2</i>           | chr8:104226690-104248558  | 39.1736  | 41.1812  | 0.0721  | 0.242780 |
| <i>Eif3l</i>         | chr15:79075222-79094400   | 88.3517  | 85.8969  | -0.0407 | 0.572077 |
| <i>Galnt1</i>        | chr18:24205343-24286818   | 32.2633  | 31.4952  | -0.0348 | 0.605852 |

|                      |                           |          |          |         |          |
|----------------------|---------------------------|----------|----------|---------|----------|
| <i>Spg11</i>         | chr2:122053519-122118386  | 12.1246  | 11.8524  | -0.0328 | 0.549697 |
| <i>Apmap</i>         | chr2:150583079-150608567  | 16.1398  | 15.6459  | -0.0448 | 0.456744 |
| <i>Pik3r3</i>        | chr4:116221617-116303056  | 1.4624   | 1.6159   | 0.1441  | 0.317429 |
| <i>Mrps18a</i>       | chr17:46110985-46128910   | 7.8733   | 8.3706   | 0.0884  | 0.202004 |
| <i>Gm10451</i>       | chr12:76444559-76451336   | 3.4109   | 2.0932   | -0.7044 | 0.400892 |
| <i>Hist1h2ac</i>     | chr13:23681466-23683948   | 2.1908   | 2.4777   | 0.1776  | 0.440889 |
| <i>lqsec1</i>        | chr6:90659597-90810123    | 3.7698   | 4.1111   | 0.1250  | 0.489204 |
| <i>Zfp358</i>        | chr8:3493137-3497208      | 4.0858   | 3.8354   | -0.0913 | 0.416058 |
| <i>Yaf2</i>          | chr15:93284277-93336935   | 12.7488  | 12.1281  | -0.0720 | 0.539127 |
| <i>Zfp395</i>        | chr14:65358675-65398930   | 1.8994   | 1.7720   | -0.1001 | 0.495829 |
| <i>Mrps34</i>        | chr17:24895115-24897502   | 23.7556  | 22.8757  | -0.0545 | 0.573958 |
| <i>Bysl</i>          | chr17:47599330-47611492   | 17.8598  | 17.4328  | -0.0349 | 0.520289 |
| <i>Lmbrd1</i>        | chr1:24678543-24766299    | 10.5101  | 11.0667  | 0.0744  | 0.200586 |
| <i>lqcc</i>          | chr4:129615125-129619099  | 18.2070  | 17.4644  | -0.0601 | 0.596219 |
| <i>Rfc1</i>          | chr5:65261851-65335670    | 17.8336  | 18.6419  | 0.0639  | 0.053515 |
| <i>Rpap1</i>         | chr2:119763303-119787537  | 7.9602   | 7.5959   | -0.0676 | 0.651774 |
| <i>Card14</i>        | chr11:119307767-119345375 | 2.9750   | 3.2484   | 0.1269  | 0.411424 |
| <i>Srsf5</i>         | chr12:80945503-80950507   | 177.5938 | 174.5616 | -0.0248 | 0.543822 |
| <i>Pmvk</i>          | chr3:89459117-89469013    | 11.1017  | 10.4519  | -0.0870 | 0.501435 |
| <i>Rps27a</i>        | chr11:29545845-29548109   | 12.9958  | 12.4735  | -0.0592 | 0.476288 |
| <i>Cenpc1</i>        | chr5:86012042-86065583    | 11.7001  | 12.5058  | 0.0961  | 0.406211 |
| <i>Chd2</i>          | chr7:73426690-73541746    | 64.0005  | 67.1256  | 0.0688  | 0.286319 |
| <i>Kctd13</i>        | chr7:126928878-126945631  | 6.7206   | 7.2565   | 0.1107  | 0.299112 |
| <i>Bbs9</i>          | chr9:22475714-22888280    | 9.9338   | 9.6008   | -0.0492 | 0.566492 |
| <i>Skiv2l</i>        | chr17:34839227-34850210   | 32.7807  | 31.8409  | -0.0420 | 0.645502 |
| <i>B130006D01Rik</i> | chr11:95723586-95726710   | 3.8511   | 4.2307   | 0.1356  | 0.401831 |
| <i>Hist1h2be</i>     | chr13:23583741-23621124   | 2.9806   | 3.3049   | 0.1490  | 0.477803 |
| <i>Ubp1</i>          | chr9:113930933-113977199  | 48.8525  | 47.8841  | -0.0289 | 0.626789 |
| <i>Wdyh1</i>         | chr15:58141435-58158652   | 19.7619  | 21.0594  | 0.0917  | 0.263061 |
| <i>Mettl7a1</i>      | chr15:100304816-100314348 | 2.7803   | 3.0913   | 0.1530  | 0.284912 |
| <i>Rft1</i>          | chr14:30654359-30691317   | 5.3353   | 5.8213   | 0.1258  | 0.478230 |
| <i>Zfp160</i>        | chr17:21008940-21028852   | 14.2880  | 13.8587  | -0.0440 | 0.566964 |
| <i>Gm17080</i>       | chr17:45586119-45588377   | 9.7052   | 10.7638  | 0.1494  | 0.422921 |
| <i>Nhs1</i>          | chr10:18390321-18533892   | 1.0446   | 1.1371   | 0.1224  | 0.384569 |
| <i>Npcd</i>          | chr15:79789674-79834237   | 5.2932   | 4.9350   | -0.1011 | 0.490193 |
| <i>Pno1</i>          | chr11:17203197-17211568   | 13.2948  | 12.6860  | -0.0676 | 0.525354 |
| <i>Gars</i>          | chr6:55038000-55079504    | 53.7329  | 52.5000  | -0.0335 | 0.594744 |
| <i>Mef2d</i>         | chr3:88142371-88172086    | 14.1208  | 15.3521  | 0.1206  | 0.526459 |
| <i>Mrpl46</i>        | chr7:78775235-78783531    | 17.8042  | 16.9360  | -0.0721 | 0.526490 |
| <i>Ube2cbp</i>       | chr9:86307233-86464950    | 3.3125   | 2.9665   | -0.1592 | 0.569282 |
| <i>Tmpo</i>          | chr10:91147570-91171582   | 41.1570  | 40.0973  | -0.0376 | 0.610708 |
| <i>Eif2b1</i>        | chr5:124570212-124579131  | 13.8766  | 13.2881  | -0.0625 | 0.561981 |
| <i>Ppil3</i>         | chr1:58430993-58445486    | 19.1192  | 18.1166  | -0.0777 | 0.588849 |
| <i>Prr3</i>          | chr17:35972540-35980236   | 5.0281   | 5.4935   | 0.1277  | 0.453586 |
| <i>Dxo</i>           | chr17:34837018-34839233   | 14.5884  | 15.6338  | 0.0998  | 0.371185 |
| <i>Irf6</i>          | chr1:193153111-193172042  | 7.2213   | 7.8060   | 0.1123  | 0.486885 |
| <i>Ssrp1</i>         | chr2:85037233-85047109    | 58.5496  | 57.2124  | -0.0333 | 0.578626 |
| <i>Atrip</i>         | chr9:109057932-109074124  | 17.1908  | 18.2335  | 0.0850  | 0.377243 |
| <i>Mttr12</i>        | chr15:12205027-12272240   | 23.3663  | 22.9335  | -0.0270 | 0.544017 |
| <i>Psmb5</i>         | chr14:54614119-54617995   | 19.8190  | 18.7485  | -0.0801 | 0.522126 |
| <i>Zap70</i>         | chr1:36761860-36782816    | 99.2364  | 96.5163  | -0.0401 | 0.636000 |
| <i>Gm12352</i>       | chr11:98438036-98439046   | 14.2249  | 13.3392  | -0.0927 | 0.466692 |
| <i>Trbv3</i>         | chr6:41048393-41048824    | 151.2371 | 162.0337 | 0.0995  | 0.458733 |
| <i>Tuba3a</i>        | chr6:125278273-125286042  | 2.4701   | 2.8740   | 0.2185  | 0.424487 |
| <i>Sh2b1</i>         | chr7:126466993-126475130  | 14.3922  | 15.4425  | 0.1016  | 0.438580 |
| <i>Mid1ip1</i>       | chrX:10715012-10719690    | 5.6523   | 6.1150   | 0.1135  | 0.238972 |
| <i>Alg12</i>         | chr15:88805243-88819318   | 13.9268  | 13.4108  | -0.0545 | 0.565265 |
| <i>Gm15829</i>       | chr16:33966238-33967312   | 5.0574   | 4.6164   | -0.1316 | 0.441775 |
| <i>Sod1</i>          | chr16:90220741-90226322   | 102.7377 | 110.6081 | 0.1065  | 0.464697 |
| <i>Casc4</i>         | chr2:121866969-121936220  | 2.6937   | 2.9154   | 0.1141  | 0.380866 |
| <i>Ggh</i>           | chr4:20042051-20066750    | 5.6936   | 5.2252   | -0.1239 | 0.552221 |
| <i>Pomk</i>          | chr8:25980603-25994121    | 5.1835   | 4.9402   | -0.0694 | 0.540805 |
| <i>4930412M03Rik</i> | chr11:60112218-60115230   | 6.2249   | 5.7811   | -0.1067 | 0.463482 |
| <i>Dym</i>           | chr18:75018771-75286966   | 9.9118   | 10.6507  | 0.1037  | 0.320128 |
| <i>Per2</i>          | chr1:91415983-91459330    | 0.8921   | 1.0201   | 0.1934  | 0.475925 |
| <i>Nckap1</i>        | chr2:80500511-80581380    | 2.4579   | 2.6727   | 0.1209  | 0.386228 |
| <i>Rps13-ps2</i>     | chr7:88530404-88530925    | 59.8544  | 54.5944  | -0.1327 | 0.658467 |
| <i>Bcap31</i>        | chrX:73686177-73716175    | 83.7816  | 81.2906  | -0.0435 | 0.580902 |
| <i>Phactr4</i>       | chr4:132355922-132422489  | 1.1219   | 1.2739   | 0.1832  | 0.453228 |
| <i>4930581F22Rik</i> | chr9:35116727-35130922    | 15.8665  | 15.3219  | -0.0504 | 0.597050 |
| <i>Hnnpnr</i>        | chr4:136310941-136342968  | 23.4483  | 24.5910  | 0.0686  | 0.224599 |

|                      |                           |          |          |         |          |
|----------------------|---------------------------|----------|----------|---------|----------|
| <i>Erf</i>           | chr7:25242560-25250761    | 7.5562   | 7.2050   | -0.0687 | 0.617977 |
| <i>Caap1</i>         | chr4:94500080-94556796    | 5.4188   | 5.1670   | -0.0686 | 0.527898 |
| <i>Slc35d1</i>       | chr4:103170648-103215164  | 2.3711   | 2.2343   | -0.0857 | 0.548274 |
| <i>Slc35b1</i>       | chr11:95384691-95391776   | 13.5864  | 14.5039  | 0.0943  | 0.329684 |
| <i>Chst15</i>        | chr7:132235779-132317228  | 2.4185   | 2.6382   | 0.1255  | 0.381070 |
| <i>Dusp2</i>         | chr2:127336158-127338376  | 47.5034  | 50.4828  | 0.0878  | 0.426864 |
| <i>Ntn1</i>          | chr11:68209363-68400823   | 1.3370   | 1.4979   | 0.1639  | 0.465848 |
| <i>Rpp40</i>         | chr13:35893471-35906359   | 2.1038   | 2.2788   | 0.1153  | 0.325486 |
| <i>Gm16907</i>       | chr13:63289600-63297147   | 14.3590  | 15.3818  | 0.0993  | 0.396632 |
| <i>Eif4g2</i>        | chr7:111067984-111083030  | 80.5480  | 84.3737  | 0.0669  | 0.237271 |
| <i>Raver2</i>        | chr4:101068982-101152370  | 4.6256   | 4.9291   | 0.0917  | 0.274441 |
| <i>Gm12744</i>       | chr4:106587096-106589108  | 9.6022   | 8.5867   | -0.1613 | 0.615877 |
| <i>Perm1</i>         | chr4:156215926-156221307  | 2.4300   | 2.2600   | -0.1046 | 0.584571 |
| <i>Mgea5</i>         | chr19:45750260-45783520   | 91.3680  | 95.0061  | 0.0563  | 0.073840 |
| <i>Pef1</i>          | chr4:130102557-130128135  | 12.6890  | 12.0145  | -0.0788 | 0.595838 |
| <i>Gm11399</i>       | chr11:3142047-3143363     | 14.4320  | 16.3904  | 0.1836  | 0.425278 |
| <i>Fance</i>         | chr17:28313529-28326568   | 7.1908   | 6.8397   | -0.0722 | 0.608751 |
| <i>Naca</i>          | chr10:128035345-128048637 | 11.6311  | 10.9385  | -0.0886 | 0.623082 |
| <i>Ube3b</i>         | chr5:114380627-114421168  | 21.9992  | 23.2590  | 0.0803  | 0.354177 |
| <i>Zfp655</i>        | chr5:145231722-145247302  | 16.8089  | 17.8317  | 0.0852  | 0.372717 |
| <i>Arhgef1</i>       | chr7:24902911-24926592    | 111.7913 | 119.8740 | 0.1007  | 0.509421 |
| <i>Gm15598</i>       | chr17:27988027-28008432   | 5.8229   | 5.2084   | -0.1609 | 0.556906 |
| <i>Rpf1</i>          | chr3:146506347-146521423  | 68.0412  | 66.0159  | -0.0436 | 0.567157 |
| <i>Gsg2</i>          | chr11:73135484-73138294   | 3.0926   | 3.3974   | 0.1356  | 0.407919 |
| <i>Fam65b</i>        | chr13:24582188-24733816   | 85.8952  | 84.9158  | -0.0165 | 0.634111 |
| <i>Slc25a40</i>      | chr5:8422849-8454790      | 7.6852   | 8.2614   | 0.1043  | 0.365656 |
| <i>Gm26648</i>       | chr5:24696901-24704690    | 15.0456  | 15.7746  | 0.0683  | 0.165831 |
| <i>Gm13842</i>       | chr5:116026410-116029230  | 6.5431   | 5.9943   | -0.1264 | 0.554384 |
| <i>Fam134b</i>       | chr15:25843263-25973687   | 54.7397  | 57.7683  | 0.0777  | 0.385456 |
| <i>Fbxl17</i>        | chr17:63057451-63500017   | 6.6336   | 7.1264   | 0.1034  | 0.447236 |
| <i>Rabl3</i>         | chr16:37539884-37572385   | 1.4920   | 1.6232   | 0.1216  | 0.223292 |
| <i>Creb1</i>         | chr1:64532803-64604547    | 35.2630  | 34.3941  | -0.0360 | 0.607760 |
| <i>Ralgps2</i>       | chr1:156804165-156939626  | 15.5677  | 15.1750  | -0.0369 | 0.583362 |
| <i>Atp5c1</i>        | chr2:10056015-10080510    | 101.8531 | 97.3073  | -0.0659 | 0.624917 |
| <i>Qser1</i>         | chr2:104754794-104816696  | 2.2690   | 2.4841   | 0.1306  | 0.438874 |
| <i>Mrps21</i>        | chr3:95862633-95871519    | 16.9522  | 15.8177  | -0.0999 | 0.585486 |
| <i>Smim8</i>         | chr4:34768663-34778423    | 10.3894  | 11.4785  | 0.1438  | 0.510675 |
| <i>Trbv13-1</i>      | chr6:41116035-41116468    | 123.4566 | 131.7141 | 0.0934  | 0.400132 |
| <i>1810026J23Rik</i> | chr9:21592721-21595970    | 10.6065  | 10.3044  | -0.0417 | 0.385278 |
| <i>Wdr45</i>         | chrX:7721972-7728201      | 13.1156  | 14.0519  | 0.0995  | 0.408341 |
| <i>Asic1</i>         | chr15:99670717-99701127   | 1.8361   | 1.7125   | -0.1005 | 0.278771 |
| <i>Gm26732</i>       | chr16:44329996-44333050   | 8.4992   | 9.3767   | 0.1418  | 0.542867 |
| <i>Elmo2</i>         | chr2:165288030-165326479  | 9.9965   | 9.7379   | -0.0378 | 0.612103 |
| <i>Zkscan8</i>       | chr13:21513221-21531120   | 10.1088  | 10.6898  | 0.0806  | 0.358809 |
| <i>Zfp157</i>        | chr5:138441467-138460694  | 5.1797   | 5.5280   | 0.0939  | 0.418234 |
| <i>Prmt5</i>         | chr14:54507186-54517525   | 16.9686  | 16.4282  | -0.0467 | 0.584935 |
| <i>Sdr39u1</i>       | chr14:55897285-55900232   | 50.4064  | 49.1820  | -0.0355 | 0.560702 |
| <i>Slc29a3</i>       | chr10:60712071-60752794   | 2.2644   | 2.4875   | 0.1356  | 0.454755 |
| <i>Ampd2</i>         | chr3:108074061-108086651  | 7.1635   | 6.9258   | -0.0487 | 0.591459 |
| <i>Gm26718</i>       | chr5:110259162-110269847  | 26.5853  | 25.3425  | -0.0691 | 0.602829 |
| <i>Invs</i>          | chr4:48279759-48431954    | 3.6753   | 3.5885   | -0.0345 | 0.152916 |
| <i>Hcfc2</i>         | chr10:82696159-82742428   | 11.9185  | 11.5404  | -0.0465 | 0.593659 |
| <i>Mis12</i>         | chr11:71019610-71027371   | 13.7305  | 14.6249  | 0.0910  | 0.334281 |
| <i>Adam17</i>        | chr12:21323508-21373632   | 18.7606  | 18.1757  | -0.0457 | 0.641379 |
| <i>Fam3a</i>         | chrX:74384718-74393272    | 6.2122   | 6.6967   | 0.1083  | 0.293655 |
| <i>Ccdc25</i>        | chr14:65837301-65866604   | 16.8201  | 16.2746  | -0.0476 | 0.468344 |
| <i>Pkmyt1</i>        | chr17:23726335-23736729   | 11.4052  | 10.8423  | -0.0730 | 0.636966 |
| <i>NA</i>            | chr19:45578276-45579763   | 16.9226  | 18.4508  | 0.1247  | 0.362471 |
| <i>Uri1</i>          | chr7:37960001-38019542    | 21.3868  | 20.7178  | -0.0459 | 0.569072 |
| <i>Copg1</i>         | chr6:87887813-87913595    | 24.0712  | 23.6903  | -0.0230 | 0.640574 |
| <i>Dennd6a</i>       | chr14:26579577-26633394   | 16.6919  | 16.2189  | -0.0415 | 0.566619 |
| <i>Cln7</i>          | chr17:25133390-25162104   | 12.5661  | 12.2086  | -0.0416 | 0.619611 |
| <i>Tmem186</i>       | chr16:8633883-8637712     | 19.4185  | 18.9028  | -0.0388 | 0.549335 |
| <i>Zdhhc5</i>        | chr2:84687969-84715180    | 21.3809  | 22.3784  | 0.0658  | 0.178619 |
| <i>Pip4k2b</i>       | chr11:97715156-97744704   | 27.5407  | 28.8763  | 0.0683  | 0.195035 |
| <i>Donson</i>        | chr16:91677267-91688765   | 38.6588  | 37.3446  | -0.0499 | 0.639682 |
| <i>Usp37</i>         | chr1:74435509-74544286    | 14.8041  | 14.4863  | -0.0313 | 0.568149 |
| <i>Aimp2</i>         | chr5:143902703-143909847  | 14.6866  | 14.1101  | -0.0578 | 0.483694 |
| <i>Commd6</i>        | chr14:101633765-101640686 | 17.1819  | 16.3303  | -0.0733 | 0.551584 |
| <i>Taf12</i>         | chr4:132274374-132295766  | 11.8543  | 11.2330  | -0.0777 | 0.618039 |
| <i>Cep57l1</i>       | chr10:41718839-41809607   | 9.6804   | 10.3267  | 0.0933  | 0.261977 |

|                      |                           |          |          |         |          |
|----------------------|---------------------------|----------|----------|---------|----------|
| <i>Fam117a</i>       | chr11:95337017-95381872   | 34.2871  | 33.4209  | -0.0369 | 0.639884 |
| <i>Tmub2</i>         | chr11:102284930-102289237 | 19.3280  | 18.8110  | -0.0391 | 0.566064 |
| <i>Wsb2</i>          | chr5:117357303-117378601  | 9.1733   | 8.8897   | -0.0453 | 0.598278 |
| <i>Gt(ROSA)26Sor</i> | chr6:113067427-113077333  | 20.7813  | 22.3254  | 0.1034  | 0.454097 |
| <i>Dcaf15</i>        | chr8:84097074-84104773    | 43.2762  | 42.1282  | -0.0388 | 0.633948 |
| <i>Tmem108</i>       | chr9:103482935-103761837  | 1.3688   | 1.2522   | -0.1284 | 0.412313 |
| <i>Vps52</i>         | chr17:33955811-33966984   | 17.1831  | 18.1260  | 0.0771  | 0.265930 |
| <i>Ppp1r14b</i>      | chr19:6975047-6977324     | 11.7019  | 10.8784  | -0.1053 | 0.567148 |
| <i>Gm20707</i>       | chr4:147782318-147809840  | 3.9831   | 4.3650   | 0.1321  | 0.410573 |
| <i>NA</i>            | chr10:118860825-118863542 | 15.6531  | 16.7256  | 0.0956  | 0.408166 |
| <i>Shisa3</i>        | chr5:67607882-67623552    | 1.0731   | 1.2022   | 0.1639  | 0.346135 |
| <i>Slc39a8</i>       | chr3:135825278-135888572  | 1.0179   | 0.9530   | -0.0951 | 0.496068 |
| <i>Gm17041</i>       | chr9:107300379-107301838  | 9.3591   | 10.9422  | 0.2255  | 0.492908 |
| <i>Ddx5</i>          | chr11:106780354-106789185 | 348.7857 | 363.5467 | 0.0598  | 0.207775 |
| <i>Ppp1r18</i>       | chr17:35865592-35875596   | 38.7520  | 37.8006  | -0.0359 | 0.618692 |
| <i>Ndufs1</i>        | chr1:63143595-63176822    | 30.4463  | 29.6382  | -0.0388 | 0.578770 |
| <i>Dag1</i>          | chr9:108205954-108263924  | 5.7221   | 6.3078   | 0.1406  | 0.553638 |
| <i>Map4</i>          | chr9:109931457-110083947  | 7.8663   | 8.2992   | 0.0773  | 0.352095 |
| <i>Exoc6</i>         | chr19:37550417-37683245   | 32.6376  | 34.4988  | 0.0800  | 0.398706 |
| <i>Sec24b</i>        | chr3:129982758-130061553  | 8.8648   | 9.5745   | 0.1111  | 0.516673 |
| <i>Pfkip</i>         | chr13:6579767-6648777     | 23.2122  | 22.7136  | -0.0313 | 0.652126 |
| <i>Prkd2</i>         | chr7:16842901-16870461    | 58.5278  | 56.6552  | -0.0469 | 0.684327 |
| <i>Atxn1l</i>        | chr8:109726450-109737739  | 9.9875   | 10.5318  | 0.0765  | 0.302050 |
| <i>Phip</i>          | chr9:82866158-82975489    | 41.6333  | 43.9036  | 0.0766  | 0.374050 |
| <i>Ccdc71</i>        | chr9:108460517-108465945  | 18.6573  | 18.1967  | -0.0361 | 0.486696 |
| <i>Rpsa</i>          | chr9:120127765-120132369  | 18.2204  | 19.2981  | 0.0829  | 0.193727 |
| <i>Tmem63b</i>       | chr17:45660170-45686905   | 4.6451   | 4.4490   | -0.0622 | 0.612935 |
| <i>Heatr5b</i>       | chr17:78752905-78835381   | 9.3727   | 9.9323   | 0.0837  | 0.381451 |
| <i>Cct8</i>          | chr16:87483325-87495873   | 76.7391  | 74.5202  | -0.0423 | 0.617103 |
| <i>4833407H14Rik</i> | chr19:53460630-53462723   | 5.0504   | 5.6218   | 0.1547  | 0.445043 |
| <i>Vps39</i>         | chr2:120316460-120353137  | 12.6593  | 12.4637  | -0.0225 | 0.427989 |
| <i>Aim1l</i>         | chr4:134065911-134092504  | 2.6576   | 2.5333   | -0.0691 | 0.559424 |
| <i>Gtf3c6</i>        | chr10:40249202-40257665   | 17.0013  | 18.6058  | 0.1301  | 0.467548 |
| <i>Srgn</i>          | chr10:62493832-62527451   | 98.5916  | 111.9767 | 0.1837  | 0.495590 |
| <i>Specc1l</i>       | chr10:75212072-75312399   | 27.6586  | 27.2134  | -0.0234 | 0.627100 |
| <i>Llph</i>          | chr10:120227069-120232071 | 6.4509   | 7.0051   | 0.1189  | 0.275747 |
| <i>Pip4k2c</i>       | chr10:127197066-127211622 | 16.4273  | 16.0498  | -0.0335 | 0.465684 |
| <i>Gm12216</i>       | chr11:53783417-53859256   | 4.3896   | 4.1084   | -0.0955 | 0.597022 |
| <i>Ifj35</i>         | chr11:101448406-101458698 | 55.3991  | 53.3473  | -0.0544 | 0.653988 |
| <i>1810043H04Rik</i> | chr11:120098927-120100704 | 12.4651  | 11.5703  | -0.1075 | 0.555024 |
| <i>Pak1ip1</i>       | chr13:41001022-41013019   | 23.7701  | 23.1377  | -0.0389 | 0.570632 |
| <i>Dhfr</i>          | chr13:92354782-92389053   | 1.6636   | 1.5433   | -0.1083 | 0.492140 |
| <i>1700028E10Rik</i> | chr5:151368708-151414083  | 1.7904   | 2.0395   | 0.1879  | 0.480036 |
| <i>Tia1</i>          | chr6:86404218-86433403    | 13.5194  | 14.1043  | 0.0611  | 0.122749 |
| <i>Trnt1</i>         | chr6:106769119-106782474  | 34.8735  | 33.8766  | -0.0418 | 0.597669 |
| <i>Zfp606</i>        | chr7:12478292-12496235    | 5.1777   | 5.0268   | -0.0427 | 0.467743 |
| <i>Mettl10</i>       | chr7:132827456-132852673  | 13.5221  | 12.9390  | -0.0636 | 0.531524 |
| <i>Arglu1</i>        | chr8:8666576-8690537      | 105.2144 | 103.1664 | -0.0284 | 0.618041 |
| <i>Zfp266</i>        | chr9:20495067-20521417    | 19.0007  | 18.5817  | -0.0322 | 0.572956 |
| <i>Srpr</i>          | chr9:35200174-35247973    | 20.9202  | 22.0071  | 0.0731  | 0.277856 |
| <i>Amacr</i>         | chr15:10981755-10996624   | 2.4010   | 2.2102   | -0.1194 | 0.435844 |
| <i>Nckap5los</i>     | chr15:99427700-99435313   | 2.9560   | 3.3796   | 0.1932  | 0.467352 |
| <i>Chchd1</i>        | chr14:20703026-20704417   | 47.7574  | 52.4807  | 0.1361  | 0.536156 |
| <i>Kctd20</i>        | chr17:28951949-28969549   | 22.0710  | 21.6482  | -0.0279 | 0.562795 |
| <i>Lbh</i>           | chr17:72918304-72941942   | 88.4715  | 86.3488  | -0.0350 | 0.635847 |
| <i>Map3k11</i>       | chr19:5689130-5702862     | 21.3814  | 20.7858  | -0.0408 | 0.645251 |
| <i>Gm14965</i>       | chr19:6409399-6418606     | 7.1229   | 6.6998   | -0.0884 | 0.497879 |
| <i>Fkbp2</i>         | chr19:6977740-6980461     | 10.8334  | 11.9708  | 0.1440  | 0.398622 |
| <i>Cwf19l1</i>       | chr19:44108643-44135876   | 7.6550   | 8.1646   | 0.0930  | 0.313345 |
| <i>Mrpl15</i>        | chr1:4773205-4785739      | 10.2394  | 9.8944   | -0.0495 | 0.582249 |
| <i>Arpc5</i>         | chr1:152766541-152775597  | 146.5438 | 140.7980 | -0.0577 | 0.636999 |
| <i>Gorab</i>         | chr1:163384908-163403641  | 4.9185   | 5.3224   | 0.1139  | 0.366044 |
| <i>Sft2d2</i>        | chr1:165174340-165194433  | 41.3342  | 40.5267  | -0.0285 | 0.620188 |
| <i>Polr2d</i>        | chr18:31789158-31796642   | 17.5799  | 16.5770  | -0.0847 | 0.556585 |
| <i>Dtwd2</i>         | chr18:49696144-49755601   | 2.6239   | 2.4572   | -0.0947 | 0.500487 |
| <i>Ndor1</i>         | chr2:25244820-25256022    | 16.4598  | 15.9260  | -0.0476 | 0.676755 |
| <i>Adal</i>          | chr2:121140427-121156680  | 7.3960   | 7.2068   | -0.0374 | 0.328950 |
| <i>Ccdc109b</i>      | chr3:129914959-129970206  | 4.8020   | 5.3653   | 0.1600  | 0.498061 |
| <i>Ikbkap</i>        | chr4:56749679-56802331    | 13.4806  | 13.1728  | -0.0333 | 0.614830 |
| <i>Prpf4</i>         | chr4:62408796-62426990    | 11.4906  | 11.1769  | -0.0399 | 0.543412 |
| <i>AU040320</i>      | chr4:126753543-126870070  | 12.3491  | 13.1110  | 0.0864  | 0.430020 |

|                 |                            |          |          |         |          |
|-----------------|----------------------------|----------|----------|---------|----------|
| <i>Fam76a</i>   | chr4:132899212-132922558   | 10.9222  | 10.5275  | -0.0531 | 0.523054 |
| <i>Pnrc2</i>    | chr4:135870917-135873850   | 98.5721  | 95.0241  | -0.0529 | 0.641468 |
| <i>Fndc9</i>    | chr11:46235530-46239872    | 5.6222   | 6.2273   | 0.1475  | 0.538206 |
| <i>Cecr5</i>    | chr6:120509493-120531319   | 40.3734  | 39.5405  | -0.0301 | 0.631516 |
| <i>Pik3c2a</i>  | chr7:116337275-116443458   | 27.4616  | 28.9406  | 0.0757  | 0.380187 |
| <i>Senp8</i>    | chr9:59734258-59750649     | 1.4151   | 1.5830   | 0.1617  | 0.360216 |
| <i>Cox15</i>    | chr19:43733253-43753000    | 7.1261   | 7.6012   | 0.0931  | 0.391239 |
| <i>Gtf2b</i>    | chr3:142765225-142783603   | 37.7930  | 36.1372  | -0.0646 | 0.610352 |
| <i>Tomm7</i>    | chr5:23838943-23844161     | 34.1614  | 37.8270  | 0.1471  | 0.553876 |
| <i>Tada2b</i>   | chr5:36473669-36484285     | 10.6935  | 11.3052  | 0.0803  | 0.205621 |
| <i>NA</i>       | chr17:17374331-17394898    | 16.6799  | 16.2408  | -0.0385 | 0.502814 |
| <i>Brpf3</i>    | chr17:28801089-28838546    | 2.9306   | 3.2232   | 0.1373  | 0.558392 |
| <i>Ccdc30</i>   | chr4:119322892-119415521   | 1.3786   | 1.2869   | -0.0993 | 0.492198 |
| <i>Srpk1</i>    | chr17:28587647-28622521    | 59.1286  | 58.1551  | -0.0240 | 0.615714 |
| <i>Zfp148</i>   | chr16:33380774-33503903    | 19.6995  | 19.3474  | -0.0260 | 0.573162 |
| <i>Lsm10</i>    | chr4:126096622-126098584   | 15.4190  | 14.5673  | -0.0820 | 0.513022 |
| <i>Stk40</i>    | chr4:126103956-126141029   | 7.9258   | 8.4564   | 0.0935  | 0.386440 |
| <i>Rere</i>     | chr4:150281645-150621966   | 9.7673   | 10.3981  | 0.0903  | 0.408041 |
| <i>Trappc9</i>  | chr15:72589620-73061204    | 7.7078   | 8.2149   | 0.0919  | 0.425971 |
| <i>Fbxl3</i>    | chr14:103080238-103099566  | 41.6935  | 41.0014  | -0.0242 | 0.558971 |
| <i>Rab20</i>    | chr8:11453391-11478638     | 7.4981   | 7.0234   | -0.0944 | 0.543777 |
| <i>Pramef8</i>  | chr4:143412425-143421091   | 14.5683  | 14.2488  | -0.0320 | 0.520365 |
| <i>Atp11a</i>   | chr8:12757013-12868728     | 3.9820   | 4.3003   | 0.1110  | 0.520438 |
| <i>Cbfa2t2</i>  | chr2:154436480-154539356   | 3.3738   | 3.6332   | 0.1069  | 0.425010 |
| <i>Trim45</i>   | chr3:100922201-100936925   | 0.7465   | 0.8425   | 0.1746  | 0.370385 |
| <i>Fbf1</i>     | chr11:116142284-116168166  | 4.1267   | 4.0131   | -0.0403 | 0.468588 |
| <i>Eri2</i>     | chr7:119768678-119794058   | 3.0387   | 3.2505   | 0.0972  | 0.368538 |
| <i>Gm22701</i>  | chr8:110498851-110499127   | 52.5057  | 43.7528  | -0.2631 | 0.445641 |
| <i>Gm6712</i>   | chr17:17316077-17319511    | 14.1300  | 13.1913  | -0.0992 | 0.171913 |
| <i>Papss1</i>   | chr3:131564767-131643670   | 14.3333  | 13.7576  | -0.0591 | 0.594707 |
| <i>Elp5</i>     | chr11:69968221-69982517    | 12.5594  | 12.1115  | -0.0524 | 0.497061 |
| <i>Exosc3</i>   | chr4:45316612-45342732     | 30.5046  | 29.5130  | -0.0477 | 0.522967 |
| <i>Slc5a3</i>   | chr16:92058321-92087473    | 4.6060   | 4.9530   | 0.1048  | 0.488447 |
| <i>Rnaseh1</i>  | chr12:28649601-28659591    | 19.1106  | 18.3973  | -0.0549 | 0.574653 |
| <i>Fancd2</i>   | chr6:113531681-113597017   | 0.4817   | 0.5504   | 0.1924  | 0.518881 |
| <i>Ogfd1</i>    | chr8:94037197-94067921     | 6.6176   | 6.3724   | -0.0545 | 0.589495 |
| <i>Cryl1</i>    | chr14:57275033-57398483    | 8.0825   | 8.7540   | 0.1151  | 0.317778 |
| <i>Ccdc186</i>  | chr19:56787480-56822190    | 7.9237   | 8.3608   | 0.0775  | 0.261499 |
| <i>Prpf18</i>   | chr2:4622057-4652113       | 20.3667  | 19.9450  | -0.0302 | 0.583135 |
| <i>Med8</i>     | chr4:118409336-118415782   | 22.0193  | 21.4166  | -0.0400 | 0.566997 |
| <i>Rab43</i>    | chr6:87788852-87812164     | 11.3477  | 10.9934  | -0.0458 | 0.637262 |
| <i>Abtb1</i>    | chr6:88835914-88841935     | 28.2063  | 27.3553  | -0.0442 | 0.625848 |
| <i>BC035044</i> | chr6:128848043-128891126   | 2.1258   | 1.9658   | -0.1129 | 0.358477 |
| <i>Ddx47</i>    | chr6:135011611-135023776   | 18.0694  | 19.0726  | 0.0780  | 0.332751 |
| <i>Sntb1</i>    | chr15:55638842-55906949    | 15.7681  | 17.0064  | 0.1091  | 0.516650 |
| <i>Rit1</i>     | chr3:88716837-88731049     | 10.2566  | 9.8611   | -0.0567 | 0.538610 |
| <i>Prdm10</i>   | chr9:31280537-31378543     | 5.1957   | 5.5458   | 0.0941  | 0.379685 |
| <i>Lyrm2</i>    | chr4:32800252-32801559     | 15.2840  | 16.6617  | 0.1245  | 0.488158 |
| <i>Tgtp2</i>    | chr11:49057193-49064206    | 31.4884  | 30.4682  | -0.0475 | 0.650921 |
| <i>Cinp</i>     | chr12:110872609-110889145  | 9.7442   | 9.2325   | -0.0778 | 0.565731 |
| <i>Dbf4</i>     | chr5:8396972-8422716       | 7.6950   | 7.3904   | -0.0583 | 0.615658 |
| <i>Gbp8</i>     | chr5:105014152-105139540   | 45.5165  | 48.1512  | 0.0812  | 0.385674 |
| <i>Ing4</i>     | chr6:125039759-125051499   | 13.9622  | 13.5605  | -0.0421 | 0.643856 |
| <i>Trappc6a</i> | chr7:19508669-19516145     | 14.4684  | 13.6662  | -0.0823 | 0.636795 |
| <i>Sema4b</i>   | chr7:80186840-80226394     | 11.2332  | 10.7567  | -0.0625 | 0.683182 |
| <i>Fbxl19</i>   | chr7:127746774-127768927   | 2.6951   | 2.9727   | 0.1414  | 0.447378 |
| <i>Psd3</i>     | chr8:67689081-68062286     | 0.3725   | 0.4123   | 0.1463  | 0.267303 |
| <i>Ddx26b</i>   | chrX:56454856-56507843     | 14.2661  | 13.9806  | -0.0292 | 0.570218 |
| <i>Camsap2</i>  | chr1:136268122-136346104   | 13.8128  | 13.4427  | -0.0392 | 0.628922 |
| <i>Ier5</i>     | chr1:155096366-155099636   | 48.5727  | 47.0603  | -0.0456 | 0.673609 |
| <i>Tor1aip2</i> | chr1:156035402-156068861   | 17.3866  | 18.0964  | 0.0577  | 0.040188 |
| <i>Adss</i>     | chr1:177762961-177796511   | 32.2756  | 33.7479  | 0.0644  | 0.246547 |
| <i>Gm12167</i>  | chr11:46342286-46345020    | 106.1388 | 103.4096 | -0.0376 | 0.560404 |
| <i>Nrde2</i>    | chr12:100125451-100159653  | 20.1637  | 19.6013  | -0.0408 | 0.629426 |
| <i>Trbj1-4</i>  | chr6:41534810-41534861     | 224.5189 | 241.6232 | 0.1059  | 0.145063 |
| <i>Fundc2</i>   | chrX:75382398-75396459     | 9.0974   | 9.8946   | 0.1212  | 0.515977 |
| <i>Gm17106</i>  | chr16:32985853-33108601    | 13.4604  | 14.9575  | 0.1521  | 0.350035 |
| <i>Fbxo3</i>    | chr2:104027720-104063240   | 13.4110  | 14.1121  | 0.0735  | 0.352948 |
| <i>Lyar</i>     | chr5:38220469-38234306     | 12.6678  | 12.0560  | -0.0714 | 0.605736 |
| <i>Zdhhc17</i>  | chr10:110941781-1111010066 | 15.2319  | 16.0179  | 0.0726  | 0.296623 |
| <i>Flot1</i>    | chr17:35823229-35832791    | 10.6902  | 10.1959  | -0.0683 | 0.637560 |

|                      |                           |          |          |         |          |
|----------------------|---------------------------|----------|----------|---------|----------|
| <i>Snx15</i>         | chr19:6119398-6128304     | 8.0939   | 8.6479   | 0.0955  | 0.191498 |
| <i>Gm9967</i>        | chr7:126774964-126776818  | 2.5817   | 2.3527   | -0.1340 | 0.458927 |
| <i>Tmem123</i>       | chr9:7764040-7794333      | 68.3290  | 66.0784  | -0.0483 | 0.636150 |
| <i>Pus3</i>          | chr9:35558594-35567183    | 27.7852  | 26.7019  | -0.0574 | 0.656146 |
| <i>Bag6</i>          | chr17:35135177-35147322   | 19.0389  | 20.2393  | 0.0882  | 0.458572 |
| <i>Sfxn4</i>         | chr19:60837276-60861479   | 1.6163   | 1.7961   | 0.1521  | 0.270274 |
| <i>Ccne2</i>         | chr4:11191350-11204779    | 3.3445   | 3.6273   | 0.1171  | 0.428884 |
| <i>Zcchc17</i>       | chr4:130315382-130359943  | 9.7998   | 9.3894   | -0.0617 | 0.601980 |
| <i>Grin3b</i>        | chr10:79970714-79977190   | 1.7440   | 1.6152   | -0.1107 | 0.546778 |
| <i>Dnajb6</i>        | chr5:29735687-29786478    | 6.7123   | 6.5440   | -0.0366 | 0.463783 |
| <i>Pradc1</i>        | chr6:85446809-85451970    | 7.7242   | 7.3760   | -0.0665 | 0.295003 |
| <i>Proser3</i>       | chr7:30539133-30552296    | 1.5239   | 1.4117   | -0.1103 | 0.442069 |
| <i>Siae</i>          | chr9:37613846-37648318    | 6.5845   | 6.3356   | -0.0556 | 0.539678 |
| <i>Hsf2</i>          | chr10:57486384-57513133   | 6.3416   | 6.0222   | -0.0745 | 0.543617 |
| <i>Trappc11</i>      | chr8:47490114-47533470    | 18.0775  | 17.7191  | -0.0289 | 0.576529 |
| <i>Wdr89</i>         | chr12:75630593-75669537   | 5.6909   | 5.4056   | -0.0742 | 0.594890 |
| <i>Zfp459</i>        | chr13:67405721-67421418   | 1.4027   | 1.5804   | 0.1721  | 0.408275 |
| <i>Snx19</i>         | chr9:30427328-30466726    | 13.0598  | 13.9171  | 0.0917  | 0.478017 |
| <i>Gm16278</i>       | chr17:25919088-25935745   | 2.6550   | 2.9799   | 0.1665  | 0.424352 |
| <i>Pmm2</i>          | chr16:8637673-8657531     | 21.7034  | 21.3362  | -0.0246 | 0.611092 |
| <i>Adprh</i>         | chr16:38445398-38452689   | 22.9405  | 22.1752  | -0.0490 | 0.568542 |
| <i>Pygm</i>          | chr19:6384398-6398459     | 3.2038   | 3.5370   | 0.1427  | 0.455088 |
| <i>Nsun4</i>         | chr4:116032841-116053876  | 11.5935  | 11.2488  | -0.0435 | 0.552118 |
| <i>Celsr2</i>        | chr3:108390850-108415552  | 0.5534   | 0.5192   | -0.0921 | 0.373985 |
| <i>Nmt1</i>          | chr11:103028189-103068912 | 22.5785  | 22.1585  | -0.0271 | 0.578444 |
| <i>Iars2</i>         | chr1:185284725-185329396  | 18.9132  | 18.5358  | -0.0291 | 0.667634 |
| <i>Rwdd3</i>         | chr3:121155399-121171695  | 1.7584   | 1.9501   | 0.1493  | 0.473182 |
| <i>Gm26920</i>       | chr7:30056033-30090410    | 8.8803   | 8.5656   | -0.0520 | 0.414614 |
| <i>Gm9812</i>        | chr12:55820610-55821580   | 6.4110   | 5.9536   | -0.1068 | 0.551439 |
| <i>Triobp</i>        | chr15:78947723-79005867   | 5.5000   | 5.3706   | -0.0343 | 0.605662 |
| <i>Rdh12</i>         | chr12:79208913-79222665   | 2.6855   | 2.9798   | 0.1501  | 0.488774 |
| <i>Afap1</i>         | chr5:35893318-36003923    | 2.5969   | 2.8182   | 0.1180  | 0.486138 |
| <i>Adcy6</i>         | chr15:98589993-98607633   | 16.4510  | 15.9152  | -0.0478 | 0.687531 |
| <i>Lgals1</i>        | chr15:78926724-78930465   | 133.3692 | 145.2675 | 0.1233  | 0.589848 |
| <i>Clybl</i>         | chr14:122181693-122402232 | 5.7031   | 6.2638   | 0.1353  | 0.409143 |
| <i>Chic2</i>         | chr5:75001025-75044774    | 8.3583   | 8.8075   | 0.0755  | 0.249662 |
| <i>Ube3a</i>         | chr7:59228751-59306727    | 37.2636  | 36.7123  | -0.0215 | 0.549505 |
| <i>Tmem181a</i>      | chr17:6270474-6305783     | 2.7163   | 3.0221   | 0.1539  | 0.396696 |
| <i>Lgals3bp</i>      | chr11:118392750-118402092 | 24.5834  | 26.8822  | 0.1290  | 0.594646 |
| <i>Mboat1</i>        | chr13:30136497-30246717   | 15.0915  | 15.8679  | 0.0724  | 0.177567 |
| <i>Por</i>           | chr5:135670032-135735326  | 14.7286  | 14.2726  | -0.0454 | 0.662208 |
| <i>Lancl2</i>        | chr6:57702600-57739438    | 3.1652   | 2.9840   | -0.0850 | 0.493396 |
| <i>Smarcad1</i>      | chr6:65042666-65116050    | 14.6290  | 14.2533  | -0.0375 | 0.583308 |
| <i>Ijfo1</i>         | chr6:125145240-125161782  | 7.7171   | 7.4892   | -0.0433 | 0.635273 |
| <i>Eps15l1</i>       | chr8:72341000-72421474    | 21.5886  | 22.7655  | 0.0766  | 0.315947 |
| <i>Rbx1</i>          | chr15:81466315-81476369   | 25.4060  | 24.6199  | -0.0453 | 0.546242 |
| <i>Ano6</i>          | chr15:95790842-95975464   | 19.0690  | 20.0965  | 0.0757  | 0.327830 |
| <i>Gtf2h4</i>        | chr17:35667729-35673739   | 4.4092   | 4.2120   | -0.0660 | 0.438121 |
| <i>Ccdc58</i>        | chr16:36071659-36092118   | 9.9677   | 9.4314   | -0.0798 | 0.448309 |
| <i>1700056E22Rik</i> | chr1:184033031-184033998  | 3.8401   | 4.4598   | 0.2159  | 0.551572 |
| <i>Naif1</i>         | chr2:32450456-32456953    | 3.8395   | 3.6780   | -0.0620 | 0.596594 |
| <i>Cops2</i>         | chr2:125830303-125859139  | 27.6792  | 29.2893  | 0.0816  | 0.422551 |
| <i>Rpl11</i>         | chr4:136028264-136053428  | 8.3860   | 8.9612   | 0.0957  | 0.296751 |
| <i>Rsc1a1</i>        | chr4:141683562-141723419  | 28.5472  | 27.9926  | -0.0283 | 0.599945 |
| <i>Shoc2</i>         | chr19:53944305-54033268   | 28.9002  | 28.0357  | -0.0438 | 0.632851 |
| <i>Trim5</i>         | chr7:104263385-104288094  | 15.2439  | 16.2098  | 0.0886  | 0.418617 |
| <i>Ehhadh</i>        | chr16:21761286-21787844   | 6.4907   | 6.1459   | -0.0788 | 0.573791 |
| <i>Snora81</i>       | chr16:23110755-23110933   | 203.1231 | 180.5261 | -0.1701 | 0.546268 |
| <i>Exd2</i>          | chr12:80463094-80498135   | 12.3262  | 12.9831  | 0.0749  | 0.235454 |
| <i>Praf2</i>         | chrX:7728438-7731064      | 6.1430   | 5.7408   | -0.0977 | 0.483879 |
| <i>Ring1</i>         | chr17:34020791-34024680   | 10.0200  | 9.7197   | -0.0439 | 0.554989 |
| <i>Aldh16a1</i>      | chr7:45140683-45154584    | 6.0496   | 5.8321   | -0.0528 | 0.592172 |
| <i>Zfp948</i>        | chr17:21567045-21588697   | 1.8876   | 2.1207   | 0.1680  | 0.449465 |
| <i>Cetn3</i>         | chr13:81783291-81797143   | 39.2807  | 42.7670  | 0.1227  | 0.544193 |
| <i>Sh3glb1</i>       | chr3:144688843-144720323  | 31.1399  | 32.9523  | 0.0816  | 0.430395 |
| <i>Gpx4</i>          | chr10:80047165-80056439   | 9.6321   | 9.0063   | -0.0969 | 0.615832 |
| <i>Gbas</i>          | chr5:129725062-129758327  | 18.8323  | 18.2514  | -0.0452 | 0.578340 |
| <i>Cdc42ep3</i>      | chr17:79334024-79355091   | 13.7153  | 13.1507  | -0.0607 | 0.592025 |
| <i>Brd1</i>          | chr15:88687299-88734233   | 22.6595  | 22.1382  | -0.0336 | 0.679589 |
| <i>Gm9752</i>        | chr13:119473803-119476761 | 14.9809  | 15.8672  | 0.0829  | 0.376313 |
| <i>Ubl4</i>          | chrX:74365717-74373218    | 10.9378  | 10.5403  | -0.0534 | 0.603159 |

|                      |                           |         |         |         |          |
|----------------------|---------------------------|---------|---------|---------|----------|
| <i>Mta3</i>          | chr17:83706162-83821516   | 16.4877 | 16.1804 | -0.0271 | 0.593461 |
| <i>Mbd4</i>          | chr6:115840696-115853371  | 4.4645  | 4.7761  | 0.0973  | 0.412337 |
| <i>Stradb</i>        | chr1:58973521-58995715    | 2.6558  | 2.5367  | -0.0662 | 0.601092 |
| <i>Dpp7</i>          | chr2:25352275-25356359    | 4.3761  | 4.1390  | -0.0804 | 0.571273 |
| <i>Nim1k</i>         | chr13:119710093-119755882 | 0.7574  | 0.7002  | -0.1132 | 0.580593 |
| <i>Ythdc1</i>        | chr5:86804220-86836659    | 37.4127 | 36.6611 | -0.0293 | 0.663634 |
| <i>Crif2</i>         | chr5:109554710-109558993  | 22.5975 | 21.8813 | -0.0465 | 0.593004 |
| <i>Brip1</i>         | chr11:86058137-86201193   | 1.1106  | 1.0323  | -0.1054 | 0.506933 |
| <i>Gk5</i>           | chr9:96119361-96184627    | 1.5288  | 1.4415  | -0.0849 | 0.479908 |
| <i>Zfp386</i>        | chr12:116047723-116063360 | 17.8996 | 18.8639 | 0.0757  | 0.390767 |
| <i>Slc7a5</i>        | chr8:121881149-121907694  | 8.9539  | 9.6864  | 0.1134  | 0.509089 |
| <i>Dclre1c</i>       | chr2:3424130-3464130      | 4.3646  | 4.2440  | -0.0404 | 0.572166 |
| <i>Ankrd37</i>       | chr8:45996901-45999867    | 5.1776  | 5.6605  | 0.1286  | 0.376643 |
| <i>AA474331</i>      | chr10:39890017-39899238   | 4.1120  | 3.9437  | -0.0603 | 0.444430 |
| <i>Ufc1</i>          | chr1:171288562-171295024  | 18.8717 | 20.2557 | 0.1021  | 0.503518 |
| <i>2310015A10Rik</i> | chr12:80120547-80132844   | 6.4209  | 6.8819  | 0.1000  | 0.455275 |
| <i>Grpel1</i>        | chr5:36464997-36474080    | 19.3827 | 18.7919 | -0.0447 | 0.609193 |
| <i>Pwwp2a</i>        | chr11:43681997-43721491   | 8.7536  | 8.5324  | -0.0369 | 0.605181 |
| <i>Fiz1</i>          | chr7:5007056-5014697      | 12.1064 | 11.7563 | -0.0423 | 0.613090 |
| <i>9430038I01Rik</i> | chr7:137375573-137410762  | 1.4341  | 1.3386  | -0.0994 | 0.523349 |
| <i>AU019823</i>      | chr9:50605239-50617464    | 8.6523  | 8.4225  | -0.0388 | 0.558718 |
| <i>Rai1</i>          | chr11:60105012-60199197   | 7.4922  | 8.1276  | 0.1174  | 0.556457 |
| <i>Gdpd5</i>         | chr7:99381548-99460983    | 2.1189  | 2.3413  | 0.1440  | 0.467250 |
| <i>Rufy2</i>         | chr10:62980222-63017210   | 16.0443 | 15.7257 | -0.0289 | 0.649051 |
| <i>Zfr2</i>          | chr10:81233154-81252123   | 1.2142  | 1.3371  | 0.1391  | 0.475861 |
| <i>Rsad1</i>         | chr11:94539797-94549255   | 1.8787  | 2.0774  | 0.1450  | 0.483733 |
| <i>Ormdl3</i>        | chr11:98581255-98587368   | 18.5676 | 18.0312 | -0.0423 | 0.574011 |
| <i>Gm11626</i>       | chr11:101456575-101457390 | 51.0936 | 48.7038 | -0.0691 | 0.566311 |
| <i>Nol7</i>          | chr13:43398375-43402858   | 56.5517 | 60.1785 | 0.0897  | 0.470749 |
| <i>Cdk5</i>          | chr5:24418249-24423530    | 17.4668 | 17.0110 | -0.0381 | 0.512185 |
| <i>Ube3c</i>         | chr5:29569241-29676077    | 20.7963 | 21.7787 | 0.0666  | 0.206689 |
| <i>D930016D06Rik</i> | chr5:104525734-104554211  | 4.1924  | 4.4970  | 0.1012  | 0.320522 |
| <i>Nomo1</i>         | chr7:46033697-46084212    | 11.5714 | 11.2957 | -0.0348 | 0.654804 |
| <i>Insr</i>          | chr8:3150921-3279617      | 8.9106  | 9.4184  | 0.0799  | 0.418066 |
| <i>Phf6</i>          | chrX:52912265-52956943    | 11.5646 | 12.1829 | 0.0752  | 0.386594 |
| <i>Mcm6</i>          | chr1:128331590-128359656  | 42.6796 | 45.5294 | 0.0933  | 0.535148 |
| <i>4930579G24Rik</i> | chr3:79629078-79632817    | 2.2018  | 2.4754  | 0.1690  | 0.442720 |
| <i>Exoc2</i>         | chr13:30813918-30974047   | 32.4931 | 31.9592 | -0.0239 | 0.606846 |
| <i>Gm16001</i>       | chr5:124111108-124112241  | 5.5674  | 5.1427  | -0.1145 | 0.574954 |
| <i>Ndufaf5</i>       | chr2:140170648-140203689  | 8.2223  | 7.8230  | -0.0718 | 0.536483 |
| <i>Zdhhc12</i>       | chr2:30090943-30093648    | 4.8991  | 5.3821  | 0.1357  | 0.432797 |
| <i>NA</i>            | chr17:27565111-27566220   | 4.4720  | 4.1077  | -0.1226 | 0.504846 |
| <i>Prdm15</i>        | chr16:97791466-97851850   | 5.7867  | 5.5888  | -0.0502 | 0.685615 |
| <i>Pdxx</i>          | chr10:78436743-78464975   | 3.4709  | 3.3353  | -0.0575 | 0.567317 |
| <i>Mars</i>          | chr10:127296220-127311786 | 25.3973 | 26.8231 | 0.0788  | 0.390948 |
| <i>Sgsh</i>          | chr11:119343424-119355536 | 15.5727 | 15.1080 | -0.0437 | 0.679389 |
| <i>Rras2</i>         | chr7:114046784-114117781  | 45.2472 | 43.5323 | -0.0557 | 0.664704 |
| <i>Copb2</i>         | chr9:98563730-98588375    | 59.3995 | 58.4214 | -0.0240 | 0.588913 |
| <i>Ndufb8</i>        | chr19:44548571-44555440   | 15.9114 | 15.4398 | -0.0434 | 0.601932 |
| <i>Ik</i>            | chr18:36744655-36757639   | 80.3378 | 84.6015 | 0.0746  | 0.365237 |
| <i>Tor2a</i>         | chr2:32757233-32762244    | 13.3423 | 12.9463 | -0.0435 | 0.592731 |
| <i>Inpp5k</i>        | chr11:75630987-75648871   | 19.7501 | 19.2401 | -0.0377 | 0.684379 |
| <i>Tapbpl</i>        | chr6:125223932-125231860  | 36.5192 | 35.6125 | -0.0363 | 0.655896 |
| <i>Prim1</i>         | chr10:128015167-128030037 | 6.4299  | 6.1060  | -0.0746 | 0.627552 |
| <i>G6pc3</i>         | chr11:102189619-102194081 | 4.9422  | 4.6808  | -0.0784 | 0.518938 |
| <i>Chn2</i>          | chr6:54039553-54301810    | 2.8415  | 3.0649  | 0.1092  | 0.464650 |
| <i>Cd69</i>          | chr6:129267323-129275369  | 78.4147 | 75.7529 | -0.0498 | 0.662593 |
| <i>Zfp82</i>         | chr7:30054488-30072900    | 3.9217  | 3.7885  | -0.0499 | 0.516068 |
| <i>Cyb561d1</i>      | chr3:108195686-108201212  | 10.7499 | 11.3457 | 0.0778  | 0.355361 |
| <i>Spty2d1</i>       | chr7:46990395-47008411    | 17.2912 | 16.8978 | -0.0332 | 0.620134 |
| <i>Hsd17b12</i>      | chr2:94032688-94157964    | 15.5192 | 16.3476 | 0.0750  | 0.196262 |
| <i>Trappc13</i>      | chr13:104142148-104178469 | 10.8229 | 11.4485 | 0.0811  | 0.372235 |
| <i>Nol11</i>         | chr11:107166662-107189381 | 15.2165 | 14.8619 | -0.0340 | 0.614416 |
| <i>Pus7l</i>         | chr15:94522687-94543547   | 7.2632  | 6.9819  | -0.0570 | 0.524634 |
| <i>4833418N02Rik</i> | chr17:87274885-87282814   | 1.6405  | 1.4813  | -0.1473 | 0.572048 |
| <i>Gm26722</i>       | chr4:129309080-129318443  | 21.6093 | 23.0533 | 0.0933  | 0.411156 |
| <i>Leng8</i>         | chr7:4137038-4148173      | 37.1403 | 39.2204 | 0.0786  | 0.463967 |
| <i>Zhx1</i>          | chr15:58047002-58076541   | 18.2026 | 17.8138 | -0.0312 | 0.615529 |
| <i>Epsti1</i>        | chr14:77904238-78002656   | 67.0929 | 64.3924 | -0.0593 | 0.670477 |
| <i>Cln6</i>          | chr9:62838784-62852006    | 4.7084  | 5.1679  | 0.1343  | 0.493783 |
| <i>Errfi1</i>        | chr4:150853918-150868892  | 2.6911  | 2.5258  | -0.0915 | 0.578468 |



|                      |                           |          |          |         |          |
|----------------------|---------------------------|----------|----------|---------|----------|
| <i>Rnf126</i>        | chr10:79758514-79766952   | 14.9459  | 16.1482  | 0.1116  | 0.469656 |
| <i>Abca7</i>         | chr10:79996493-80015572   | 37.5621  | 36.3535  | -0.0472 | 0.704099 |
| <i>Nnt</i>           | chr13:119335447-119408997 | 4.7021   | 4.5557   | -0.0456 | 0.591036 |
| <i>Vac14</i>         | chr8:110618637-110720396  | 16.1999  | 15.7184  | -0.0435 | 0.668919 |
| <i>Ssx2ip</i>        | chr3:146404641-146440139  | 1.9389   | 1.7952   | -0.1110 | 0.599869 |
| <i>Ctc1</i>          | chr11:69015910-69036473   | 2.9172   | 3.1512   | 0.1113  | 0.472395 |
| <i>Tead2</i>         | chr7:45215752-45233635    | 1.0417   | 1.1707   | 0.1684  | 0.465250 |
| <i>Gm10643</i>       | chr8:84063560-84065137    | 6.2136   | 5.8101   | -0.0969 | 0.582494 |
| <i>Fam49a</i>        | chr12:12262138-12376359   | 29.8378  | 31.4583  | 0.0763  | 0.420824 |
| <i>Dram2</i>         | chr3:106547692-106574845  | 12.9594  | 13.6839  | 0.0785  | 0.255150 |
| <i>Mgat1</i>         | chr11:49244190-49263030   | 16.4635  | 16.1328  | -0.0293 | 0.636247 |
| <i>Gm20705</i>       | chr6:99384606-99388499    | 3.5230   | 3.2276   | -0.1263 | 0.631108 |
| <i>Fibp</i>          | chr19:5460606-5465052     | 31.7995  | 33.8158  | 0.0887  | 0.398240 |
| <i>Agfg1</i>         | chr1:82839482-82896275    | 79.5190  | 78.5933  | -0.0169 | 0.626656 |
| <i>Tas1r3</i>        | chr4:155859267-155863362  | 3.0720   | 2.8848   | -0.0907 | 0.641009 |
| <i>Itgam</i>         | chr7:128062639-128128160  | 1.2710   | 1.3910   | 0.1301  | 0.413294 |
| <i>Gm21974</i>       | chr7:127886226-127895454  | 3.0083   | 3.3688   | 0.1633  | 0.482325 |
| <i>Traj15</i>        | chr14:54204421-54204481   | 105.3819 | 98.2920  | -0.1005 | 0.450279 |
| <i>Lcor</i>          | chr19:41482644-41562246   | 8.2763   | 8.7635   | 0.0825  | 0.419167 |
| <i>Usp40</i>         | chr1:87945120-88008551    | 12.3957  | 13.1158  | 0.0815  | 0.402127 |
| <i>Ttbk2</i>         | chr2:120732815-120850604  | 2.2333   | 2.3927   | 0.0995  | 0.440545 |
| <i>Rundc3a</i>       | chr11:102393402-102402555 | 2.6679   | 2.9583   | 0.1491  | 0.514963 |
| <i>Kctd2</i>         | chr11:115420127-115431274 | 24.7949  | 24.2978  | -0.0292 | 0.579302 |
| <i>Gpc2</i>          | chr5:138264951-138280005  | 1.1194   | 1.0613   | -0.0770 | 0.504997 |
| <i>Itpkc</i>         | chr7:27207171-27228628    | 4.8527   | 5.1938   | 0.0980  | 0.296312 |
| <i>2410002F23Rik</i> | chr7:44246721-44262720    | 17.5949  | 17.2256  | -0.0306 | 0.699875 |
| <i>Ern1</i>          | chr11:106394649-106487852 | 2.0698   | 2.2378   | 0.1126  | 0.462035 |
| <i>Sptlc1</i>        | chr13:53332715-53377365   | 24.2184  | 23.6327  | -0.0353 | 0.601152 |
| <i>Fbxl18</i>        | chr5:142866945-142895421  | 1.0220   | 1.1088   | 0.1176  | 0.455239 |
| <i>Trim3</i>         | chr7:105604462-105633571  | 1.3417   | 1.4986   | 0.1596  | 0.439250 |
| <i>1110059G10Rik</i> | chr9:122945088-122951000  | 4.6029   | 5.0463   | 0.1327  | 0.542495 |
| <i>Sms</i>           | chrX:157443854-157492287  | 4.3160   | 4.5855   | 0.0874  | 0.332741 |
| <i>Zfp944</i>        | chr17:22337988-22361400   | 13.1836  | 12.7812  | -0.0447 | 0.569709 |
| <i>Gm4707</i>        | chr17:71458326-71460395   | 6.6713   | 7.3066   | 0.1312  | 0.522441 |
| <i>Gm15491</i>       | chr19:45749507-45752310   | 68.8959  | 72.4018  | 0.0716  | 0.223777 |
| <i>Txndc9</i>        | chr1:37983866-37997346    | 15.8372  | 15.4775  | -0.0331 | 0.587616 |
| <i>Cops8</i>         | chr1:90603424-90613341    | 29.2283  | 28.5092  | -0.0359 | 0.546153 |
| <i>Kpnb1</i>         | chr11:97159713-97187881   | 61.8964  | 60.9296  | -0.0227 | 0.644846 |
| <i>Tmem177</i>       | chr1:119907889-119913208  | 3.7291   | 4.0227   | 0.1093  | 0.362361 |
| <i>Uqcc1</i>         | chr2:155846893-155930310  | 5.6229   | 5.4462   | -0.0461 | 0.566160 |
| <i>Jtb</i>           | chr3:90231596-90235838    | 37.4522  | 36.2739  | -0.0461 | 0.619388 |
| <i>Tm2d1</i>         | chr4:98355369-98383306    | 9.1184   | 8.5235   | -0.0973 | 0.588712 |
| <i>Kcnp2</i>         | chr19:45791838-45816061   | 2.7789   | 3.0550   | 0.1367  | 0.500923 |
| <i>H2afv</i>         | chr11:6427228-6444443     | 24.0483  | 22.8985  | -0.0707 | 0.653861 |
| <i>Pigg</i>          | chr5:108312608-108349355  | 3.5761   | 3.3835   | -0.0799 | 0.657328 |
| <i>Cln3</i>          | chr7:126571206-126585817  | 10.0613  | 9.8450   | -0.0314 | 0.608904 |
| <i>Samd8</i>         | chr14:21750530-21798725   | 4.6506   | 4.4793   | -0.0541 | 0.651771 |
| <i>Rtn3</i>          | chr19:7425900-7483289     | 10.3856  | 10.8962  | 0.0692  | 0.210357 |
| <i>Traf3ip2</i>      | chr10:39612933-39655307   | 16.9542  | 18.0233  | 0.0882  | 0.458434 |
| <i>Lace1</i>         | chr10:42312584-42478565   | 3.6364   | 3.9127   | 0.1057  | 0.094521 |
| <i>Zfp280b</i>       | chr10:76032653-76043234   | 8.6992   | 9.2387   | 0.0868  | 0.366066 |
| <i>Mier2</i>         | chr10:79540244-79555199   | 9.7186   | 9.4637   | -0.0383 | 0.627305 |
| <i>Hs1bp3</i>        | chr12:8313432-8343824     | 1.7535   | 1.9320   | 0.1399  | 0.304027 |
| <i>Ttc32</i>         | chr12:9029996-9036394     | 5.5063   | 5.0827   | -0.1155 | 0.469232 |
| <i>Lrpap1</i>        | chr5:35091489-35105766    | 11.7721  | 11.5036  | -0.0333 | 0.567344 |
| <i>Gm10401</i>       | chr5:115097688-115098295  | 14.8480  | 16.1668  | 0.1228  | 0.360086 |
| <i>Ube2h</i>         | chr6:30211288-30304539    | 23.7540  | 25.0412  | 0.0761  | 0.362102 |
| <i>Shq1</i>          | chr6:100573080-100671157  | 4.3701   | 4.1517   | -0.0740 | 0.446356 |
| <i>Stard10</i>       | chr7:101317085-101346626  | 2.7042   | 2.5271   | -0.0977 | 0.505809 |
| <i>Ndrp2</i>         | chr14:51905270-51913488   | 13.4060  | 12.8379  | -0.0625 | 0.642040 |
| <i>Trav8-2</i>       | chr14:53738301-53741038   | 1.7996   | 1.6623   | -0.1145 | 0.484368 |
| <i>Traj14</i>        | chr14:54205110-54205143   | 319.4743 | 348.9518 | 0.1273  | 0.479689 |
| <i>Sec31b</i>        | chr19:44516956-44545864   | 2.7054   | 2.5599   | -0.0798 | 0.577000 |
| <i>Psmb2</i>         | chr4:126677629-126709714  | 60.0853  | 57.6918  | -0.0586 | 0.665825 |
| <i>Gan</i>           | chr8:117158134-117205834  | 2.8923   | 3.1739   | 0.1341  | 0.506718 |
| <i>Pja2</i>          | chr17:64281004-64331916   | 13.7201  | 14.4347  | 0.0733  | 0.344929 |
| <i>Sfpq</i>          | chr4:127021323-127037013  | 92.7456  | 91.1337  | -0.0253 | 0.706200 |
| <i>Vrk1</i>          | chr12:106010262-106077410 | 18.9441  | 19.9326  | 0.0734  | 0.327366 |
| <i>NA</i>            | chr13:106833859-106847267 | 4.5008   | 4.2135   | -0.0952 | 0.510716 |
| <i>Uevld</i>         | chr7:46923538-46958527    | 0.9453   | 1.0411   | 0.1393  | 0.458340 |
| <i>Vav2</i>          | chr2:27262103-27427033    | 2.7241   | 2.9237   | 0.1020  | 0.409166 |

|               |                           |           |          |         |          |
|---------------|---------------------------|-----------|----------|---------|----------|
| 9330020H09Rik | chr15:98567323-98569583   | 7.1626    | 6.8370   | -0.0671 | 0.541610 |
| Mllt1         | chr17:56892611-56935388   | 12.5682   | 12.1840  | -0.0448 | 0.680165 |
| Rps15         | chr10:80292452-80294114   | 1013.8865 | 967.1453 | -0.0681 | 0.692646 |
| Mrpl42        | chr10:95480805-95501927   | 30.5782   | 28.8713  | -0.0829 | 0.627143 |
| Trappc6b      | chr12:59043092-59061461   | 23.6587   | 22.8193  | -0.0521 | 0.596159 |
| AK010878      | chr12:102719974-102757810 | 4.3883    | 4.6423   | 0.0812  | 0.046055 |
| Gimap9        | chr6:48676128-48679114    | 143.6672  | 139.2264 | -0.0453 | 0.662599 |
| Poir2i        | chr7:30231947-30233390    | 13.8287   | 13.1406  | -0.0736 | 0.614590 |
| Kdm2a         | chr19:4316143-4398285     | 25.2501   | 24.8452  | -0.0233 | 0.715175 |
| Gm20628       | chr3:96267074-96270289    | 26.5377   | 29.8766  | 0.1710  | 0.484168 |
| Zkscan17      | chr11:59485519-59526751   | 7.0985    | 7.6000   | 0.0985  | 0.487745 |
| Hspa5         | chr2:34771969-34776531    | 96.3371   | 101.3845 | 0.0737  | 0.439678 |
| Prkar2a       | chr9:108692142-108749512  | 3.9976    | 4.3457   | 0.1205  | 0.490862 |
| Nup35         | chr2:80617235-80658906    | 3.7554    | 3.5496   | -0.0813 | 0.589067 |
| Mrto4         | chr4:139347434-139352576  | 7.7853    | 8.2756   | 0.0881  | 0.269171 |
| 1810013L24Rik | chr16:8830099-8858916     | 27.8685   | 27.3436  | -0.0274 | 0.665123 |
| Tubgcp3       | chr8:12614276-12672248    | 17.3636   | 18.1105  | 0.0608  | 0.221847 |
| Rbm14         | chr19:4800568-4811634     | 18.8505   | 18.2505  | -0.0467 | 0.711627 |
| 2700049A03Rik | chr12:71136847-71243303   | 7.5352    | 7.9784   | 0.0825  | 0.428221 |
| Hist1h3a      | chr13:23761852-23762386   | 7.7381    | 8.7799   | 0.1822  | 0.535130 |
| Ptpn12        | chr5:20986644-21055911    | 10.5624   | 10.1426  | -0.0585 | 0.653339 |
| Dera          | chr6:137754541-137837891  | 16.5283   | 15.7873  | -0.0662 | 0.643702 |
| Snord15b      | chr7:99479562-99479707    | 240.8443  | 282.0451 | 0.2278  | 0.536668 |
| Lpar2         | chr8:69822428-69831102    | 0.7103    | 0.7920   | 0.1570  | 0.272398 |
| Zfp706        | chr15:36997030-37007402   | 10.6050   | 11.2398  | 0.0839  | 0.424121 |
| Top2b         | chr14:16365178-16430787   | 139.0399  | 135.8657 | -0.0333 | 0.678538 |
| Timm17b       | chrX:7899356-7908351      | 9.0956    | 8.6483   | -0.0728 | 0.648588 |
| Ddrgk1        | chr2:130653959-130664659  | 34.9357   | 34.2774  | -0.0274 | 0.569368 |
| Erlin2        | chr8:27023798-27039433    | 9.9966    | 9.7565   | -0.0351 | 0.430491 |
| Atp2a3        | chr11:72961168-72993044   | 81.6252   | 86.0679  | 0.0765  | 0.454482 |
| Blm           | chr7:80454992-80535119    | 4.2597    | 4.1358   | -0.0426 | 0.216376 |
| Dnaaf1        | chr8:119575234-119598454  | 4.6603    | 4.4504   | -0.0665 | 0.528103 |
| Lcp1          | chr14:75131100-75230842   | 100.2650  | 98.2306  | -0.0296 | 0.668678 |
| Zfp263        | chr16:3744092-3750790     | 29.3301   | 28.8813  | -0.0222 | 0.631562 |
| Fam111a       | chr19:12545739-12589768   | 26.3303   | 25.6115  | -0.0399 | 0.677207 |
| Ralgapb       | chr2:158409847-158499253  | 18.1560   | 18.8883  | 0.0570  | 0.161846 |
| Smarcc2       | chr10:128459235-128490173 | 30.3485   | 32.0197  | 0.0773  | 0.458436 |
| NA            | chr13:23544051-23545055   | 34.4889   | 37.6785  | 0.1276  | 0.572962 |
| 4931414P19Rik | chr14:54583662-54605908   | 1.6242    | 1.8138   | 0.1593  | 0.342930 |
| Trat1         | chr16:48734689-48771956   | 94.2191   | 100.4504 | 0.0924  | 0.486935 |
| Slc26a2       | chr18:61192918-61211612   | 6.4200    | 6.7481   | 0.0719  | 0.374893 |
| Sdf2          | chr11:78245745-78255496   | 24.3200   | 23.7052  | -0.0369 | 0.553327 |
| Pou2af1       | chr9:51213689-51240079    | 7.1362    | 7.9310   | 0.1523  | 0.617461 |
| Zfp952        | chr17:32993128-33005457   | 10.1335   | 10.6274  | 0.0687  | 0.129658 |
| Hspb6         | chr7:30552177-30555443    | 3.5305    | 3.2793   | -0.1065 | 0.625804 |
| Dpp9          | chr17:56186681-56218889   | 13.2256   | 14.0789  | 0.0902  | 0.459514 |
| Rtn4          | chr11:29692946-29744331   | 14.0457   | 14.7546  | 0.0710  | 0.374374 |
| Slc39a13      | chr2:91061790-91070417    | 4.9649    | 4.8053   | -0.0471 | 0.601134 |
| Ralgs1        | chr2:33133420-33371486    | 2.3103    | 2.1914   | -0.0762 | 0.678328 |
| Spryd4        | chr10:128209907-128211794 | 10.9808   | 10.5606  | -0.0563 | 0.485406 |
| Srp14         | chr2:118475849-118479711  | 64.7612   | 61.2985  | -0.0793 | 0.675157 |
| 1700047K16Rik | chr11:58322987-58324439   | 10.2394   | 9.7014   | -0.0779 | 0.542459 |
| Zfp119b       | chr17:5938552-5945174     | 5.2971    | 5.7455   | 0.1172  | 0.405679 |
| B3gnt4        | chr5:123510459-123511882  | 2.9759    | 2.6986   | -0.1411 | 0.538722 |
| Zc3hav1       | chr6:38305285-38354603    | 115.8041  | 121.1451 | 0.0650  | 0.392782 |
| 9430015G10Rik | chr4:156109981-156127265  | 11.1322   | 10.8539  | -0.0365 | 0.575978 |
| Mttr2         | chr9:13748409-13806481    | 17.8474   | 17.4924  | -0.0290 | 0.595159 |
| Arih1         | chr9:59388257-59486618    | 31.8320   | 31.3485  | -0.0221 | 0.653801 |
| Gm26910       | chr18:67773711-67774857   | 6.0463    | 6.7414   | 0.1570  | 0.409132 |
| Gm14303       | chr2:172509431-172509697  | 15.4232   | 17.6029  | 0.1907  | 0.528839 |
| AW011738      | chr4:156203303-156205151  | 18.5147   | 19.8392  | 0.0997  | 0.494557 |
| Usp46         | chr5:73998462-74068430    | 1.8323    | 1.7371   | -0.0770 | 0.493280 |
| Utp3          | chr5:88554482-88556083    | 43.4297   | 42.1372  | -0.0436 | 0.639066 |
| Vimp          | chr7:66079648-66089412    | 27.3005   | 29.1521  | 0.0947  | 0.473873 |
| Fam53b        | chr7:132712081-132813886  | 20.1249   | 19.6541  | -0.0342 | 0.716491 |
| Xlr4c         | chrX:73233687-73243130    | 3.4237    | 3.8176   | 0.1571  | 0.526002 |
| Traf6         | chr2:101678428-101701669  | 9.7566    | 10.2858  | 0.0762  | 0.388679 |
| Wdr77         | chr3:105959368-105984600  | 14.5255   | 14.2188  | -0.0308 | 0.659594 |
| Snx6          | chr12:54746348-54795703   | 39.3970   | 37.7713  | -0.0608 | 0.671484 |
| Chm           | chrX:113040594-113185517  | 13.5174   | 13.1170  | -0.0434 | 0.653538 |
| Limk2         | chr11:3344255-3409189     | 25.9707   | 25.6367  | -0.0187 | 0.681416 |

|                      |                           |          |          |         |          |
|----------------------|---------------------------|----------|----------|---------|----------|
| <i>Tssc4</i>         | chr7:143069248-143071093  | 11.7260  | 11.3679  | -0.0448 | 0.385803 |
| <i>Slc48a1</i>       | chr15:97784354-97792692   | 12.5709  | 13.3142  | 0.0829  | 0.331260 |
| <i>Gm10548</i>       | chr18:34207774-34221772   | 2.2221   | 2.4247   | 0.1259  | 0.279167 |
| <i>B430305J03Rik</i> | chr3:61362249-61365951    | 7.6261   | 8.1765   | 0.1005  | 0.454985 |
| <i>Mtmt3</i>         | chr11:4480867-4594863     | 38.8101  | 38.3335  | -0.0178 | 0.713571 |
| <i>Herpud2</i>       | chr9:25108129-25151781    | 14.7563  | 15.6837  | 0.0879  | 0.421579 |
| <i>Dcald</i>         | chr11:102994046-103028333 | 3.3826   | 3.1943   | -0.0826 | 0.604256 |
| <i>Gprn3</i>         | chr6:59352460-59426290    | 7.3281   | 7.9432   | 0.1163  | 0.547837 |
| <i>Trib2</i>         | chr12:15791726-15816877   | 122.4782 | 120.4713 | -0.0238 | 0.690985 |
| <i>Rdh14</i>         | chr12:10390779-10395562   | 17.9961  | 17.2848  | -0.0582 | 0.618637 |
| <i>Ctu2</i>          | chr8:122476142-122484138  | 12.1455  | 11.9340  | -0.0254 | 0.522734 |
| <i>Dis3l</i>         | chr9:64306755-64341288    | 5.2513   | 5.5520   | 0.0803  | 0.335920 |
| <i>Mid1</i>          | chrX:169685198-170005736  | 0.7178   | 0.8012   | 0.1585  | 0.444522 |
| <i>Gnl3</i>          | chr14:31012433-31019089   | 43.6976  | 42.5992  | -0.0367 | 0.637714 |
| <i>Micu1</i>         | chr10:59702476-59864132   | 5.6958   | 5.5742   | -0.0311 | 0.537971 |
| <i>Rfng</i>          | chr11:120780745-120784207 | 3.9605   | 3.7447   | -0.0808 | 0.617193 |
| <i>Trappc2l</i>      | chr8:122611625-122615588  | 37.1434  | 35.7086  | -0.0568 | 0.568767 |
| <i>Lpcat4</i>        | chr2:112239467-112247111  | 7.5118   | 8.1178   | 0.1119  | 0.498150 |
| <i>Rasgrp1</i>       | chr2:117279992-117343001  | 120.0707 | 118.0921 | -0.0240 | 0.718046 |
| <i>Psm3</i>          | chr12:70974620-70996347   | 9.7801   | 9.4016   | -0.0569 | 0.641686 |
| <i>1110057K04Rik</i> | chr12:8208106-8285758     | 22.8912  | 22.4220  | -0.0299 | 0.574901 |
| <i>Gjm2</i>          | chr13:97137936-97181195   | 10.6452  | 10.4590  | -0.0255 | 0.636667 |
| <i>Nabp1</i>         | chr1:51469497-51478399    | 55.2906  | 53.9495  | -0.0354 | 0.671175 |
| <i>Ythdf3</i>        | chr3:16183182-16217035    | 40.6696  | 42.2071  | 0.0535  | 0.137805 |
| <i>Rab35</i>         | chr5:115631928-115647736  | 41.4002  | 40.6278  | -0.0272 | 0.638782 |
| <i>Mcts1</i>         | chrX:38600577-38613426    | 24.7696  | 24.0142  | -0.0447 | 0.600481 |
| <i>Carhsp1</i>       | chr16:8658586-8672153     | 5.9086   | 6.3047   | 0.0936  | 0.334387 |
| <i>Pex19</i>         | chr1:172126754-172136493  | 12.0646  | 11.8337  | -0.0279 | 0.357428 |
| <i>Snrpb2</i>        | chr2:143063038-143072853  | 16.4753  | 17.5746  | 0.0932  | 0.504422 |
| <i>Jade2</i>         | chr11:51813454-51857653   | 12.7943  | 13.4741  | 0.0747  | 0.454172 |
| <i>Ndufab1</i>       | chr7:122085402-122101886  | 3.6064   | 3.4918   | -0.0466 | 0.592570 |
| <i>Fhod1</i>         | chr8:105329162-105347953  | 6.4894   | 6.2340   | -0.0579 | 0.694677 |
| <i>Zik1</i>          | chr7:10487228-10495394    | 1.1241   | 1.2414   | 0.1431  | 0.445569 |
| <i>2510003E04Rik</i> | chr10:62538625-62578457   | 5.2879   | 5.1186   | -0.0469 | 0.642862 |
| <i>Acs1</i>          | chr8:46471040-46536051    | 2.2833   | 2.2080   | -0.0484 | 0.504454 |
| <i>Map2k1</i>        | chr9:64185769-64253631    | 25.6867  | 25.0450  | -0.0365 | 0.654028 |
| <i>Higd1a</i>        | chr9:121848559-121858000  | 6.3754   | 6.8398   | 0.1014  | 0.386242 |
| <i>Ptp4a1</i>        | chr1:30940302-30949770    | 1.4554   | 1.5773   | 0.1160  | 0.237106 |
| <i>Rala</i>          | chr13:17880574-17944239   | 20.1644  | 21.4385  | 0.0884  | 0.487093 |
| <i>Cox18</i>         | chr5:90214723-90224001    | 10.1697  | 9.8107   | -0.0518 | 0.506381 |
| <i>Ipo7</i>          | chr7:110018424-110055114  | 43.7446  | 42.7930  | -0.0317 | 0.670550 |
| <i>Rps6</i>          | chr4:86854659-86857412    | 8.4594   | 8.1232   | -0.0585 | 0.398764 |
| <i>E2f3</i>          | chr13:29906574-29985668   | 1.8052   | 1.6995   | -0.0871 | 0.598341 |
| <i>Zfp212</i>        | chr6:47920475-47932639    | 11.8194  | 11.5196  | -0.0371 | 0.646341 |
| <i>Taok2</i>         | chr7:126865677-126884703  | 15.0351  | 14.7491  | -0.0277 | 0.704998 |
| <i>Ndufc1</i>        | chr3:51404676-51408988    | 7.3732   | 7.9657   | 0.1115  | 0.434668 |
| <i>2610507I01Rik</i> | chr11:59199835-59202385   | 6.3961   | 6.0317   | -0.0846 | 0.550465 |
| <i>Arl6ip5</i>       | chr6:97210688-97233315    | 89.0845  | 86.8147  | -0.0372 | 0.674462 |
| <i>Gm20490</i>       | chr2:173022502-173022956  | 68.1224  | 64.9207  | -0.0695 | 0.602671 |
| <i>Mfn1</i>          | chr3:32529464-32579239    | 4.5679   | 4.8412   | 0.0838  | 0.331987 |
| <i>Btf3</i>          | chr13:98309895-98317006   | 50.0288  | 53.6416  | 0.1006  | 0.555203 |
| <i>Ift74</i>         | chr4:94614490-94693229    | 2.0146   | 1.8720   | -0.1059 | 0.549909 |
| <i>Zbtb44</i>        | chr9:31030643-31075879    | 10.7455  | 11.2692  | 0.0687  | 0.344637 |
| <i>Med24</i>         | chr11:98704590-98729435   | 11.3783  | 11.1360  | -0.0311 | 0.691260 |
| <i>Acot6</i>         | chr12:84100653-84111349   | 1.5546   | 1.4418   | -0.1086 | 0.542654 |
| <i>Dhcr7</i>         | chr7:143823144-143848410  | 4.0494   | 4.3675   | 0.1091  | 0.439536 |
| <i>Ttc13</i>         | chr8:124671334-124721983  | 36.6863  | 36.1392  | -0.0217 | 0.719915 |
| <i>Mtss1</i>         | chr15:58941243-59082026   | 14.7476  | 15.6300  | 0.0838  | 0.457036 |
| <i>Tada1</i>         | chr1:166379096-166393621  | 10.4504  | 10.2072  | -0.0340 | 0.508722 |
| <i>E2f2</i>          | chr4:136172393-136196057  | 9.2250   | 9.9463   | 0.1086  | 0.569733 |
| <i>Mterf2</i>        | chr10:85119434-85128027   | 12.5887  | 12.0755  | -0.0600 | 0.601297 |
| <i>Pdia6</i>         | chr12:17266544-17284770   | 25.3308  | 24.8421  | -0.0281 | 0.668158 |
| <i>Dnajb12</i>       | chr10:59879555-59899302   | 9.6002   | 10.2293  | 0.0916  | 0.440392 |
| <i>Rps8</i>          | chr4:117153826-117156243  | 47.7799  | 51.4911  | 0.1079  | 0.543324 |
| <i>Mir142b</i>       | chr11:87756863-87756927   | 88.5895  | 98.6877  | 0.1557  | 0.467246 |
| <i>Lrrc28</i>        | chr7:67513410-67645236    | 4.4844   | 4.2994   | -0.0608 | 0.592526 |
| <i>Tom70a</i>        | chr16:57121713-57154530   | 49.7223  | 48.6798  | -0.0306 | 0.670702 |
| <i>Vps29</i>         | chr5:122354368-122364984  | 11.4117  | 12.1458  | 0.0899  | 0.498615 |
| <i>Gm12256</i>       | chr11:58889709-58891548   | 25.4018  | 27.5733  | 0.1183  | 0.474157 |
| <i>C920006Q11Rik</i> | chr9:78175913-78178879    | 5.5546   | 6.1203   | 0.1399  | 0.492708 |
| <i>Samd9l</i>        | chr6:3372259-3399571      | 149.2770 | 158.1455 | 0.0833  | 0.537736 |

|                      |                           |          |          |         |          |
|----------------------|---------------------------|----------|----------|---------|----------|
| <i>Ubal2</i>         | chr11:116434093-116439077 | 4.8374   | 4.5820   | -0.0783 | 0.233858 |
| <i>Gm16083</i>       | chr1:130462575-130557075  | 3.9988   | 3.7554   | -0.0906 | 0.621071 |
| <i>Plxb1</i>         | chr9:109095435-109119911  | 0.4636   | 0.5218   | 0.1706  | 0.489023 |
| <i>Mrpl13</i>        | chr15:55534093-55557748   | 3.5639   | 3.8013   | 0.0930  | 0.462299 |
| <i>Fcho1</i>         | chr8:71708386-71725716    | 28.7755  | 30.4400  | 0.0811  | 0.516880 |
| <i>Tet1</i>          | chr10:62804569-62899118   | 3.4903   | 3.3707   | -0.0503 | 0.702283 |
| <i>Phospho1</i>      | chr11:95824498-95832140   | 2.9646   | 2.7680   | -0.0990 | 0.609627 |
| <i>Fam3c</i>         | chr6:22306519-22356243    | 36.7301  | 38.5468  | 0.0696  | 0.357931 |
| <i>Aagab</i>         | chr9:63602654-63641889    | 23.0061  | 22.4963  | -0.0323 | 0.638156 |
| <i>Il18rap</i>       | chr1:40515361-40551705    | 2.1231   | 2.7660   | 0.3817  | 0.572454 |
| <i>Vars</i>          | chr17:35000986-35016322   | 22.5979  | 23.9197  | 0.0820  | 0.518774 |
| <i>Wdr83os</i>       | chr8:85080739-85082339    | 16.8926  | 16.1036  | -0.0690 | 0.654347 |
| <i>Smad4</i>         | chr18:73639008-73703780   | 52.7691  | 51.7146  | -0.0291 | 0.701493 |
| <i>3110057012Rik</i> | chr3:40846969-40938138    | 3.5755   | 3.4381   | -0.0565 | 0.579732 |
| <i>Carns1</i>        | chr19:4164323-4175479     | 12.8180  | 13.7060  | 0.0966  | 0.541404 |
| <i>Pthrhd1</i>       | chr12:4234026-4240123     | 1.6120   | 1.7672   | 0.1327  | 0.439881 |
| <i>Map3k9</i>        | chr12:81714949-81781170   | 0.8578   | 0.7965   | -0.1071 | 0.683633 |
| <i>Dctpp1</i>        | chr7:127256958-127260709  | 10.8162  | 9.8225   | -0.1390 | 0.654211 |
| <i>Wbp4</i>          | chr14:79459936-79481268   | 17.7900  | 17.1334  | -0.0543 | 0.675356 |
| <i>Rif1</i>          | chr2:52072836-52122383    | 31.5715  | 31.0137  | -0.0257 | 0.707014 |
| <i>Arhgef11</i>      | chr3:87617558-87738034    | 11.5289  | 11.2970  | -0.0293 | 0.678657 |
| <i>Hist1h1c</i>      | chr13:23738806-23740366   | 165.3075 | 183.4761 | 0.1504  | 0.499285 |
| <i>Khk</i>           | chr5:30921555-30931246    | 5.1816   | 5.6675   | 0.1293  | 0.456254 |
| <i>Atm</i>           | chr9:53439148-53536740    | 35.1027  | 34.5547  | -0.0227 | 0.724453 |
| <i>Gm12696</i>       | chr4:97521427-97522332    | 10.6130  | 9.9152   | -0.0981 | 0.653592 |
| <i>Ndufb10</i>       | chr17:24722059-24724478   | 46.4667  | 44.7560  | -0.0541 | 0.664720 |
| <i>Bri3</i>          | chr5:14424436-144446757   | 2.4057   | 2.6789   | 0.1552  | 0.426355 |
| <i>A730061H03Rik</i> | chr14:55559941-55560406   | 9.0375   | 9.9298   | 0.1358  | 0.060248 |
| <i>Esd</i>           | chr14:74732296-74750765   | 16.3783  | 15.7541  | -0.0561 | 0.665210 |
| <i>Dnajc10</i>       | chr2:80315465-80354043    | 25.3647  | 26.5656  | 0.0667  | 0.413730 |
| <i>A930005H10Rik</i> | chr3:115887821-115888130  | 43.1887  | 41.1891  | -0.0684 | 0.627736 |
| <i>4930404I05Rik</i> | chr16:91011248-91016743   | 8.4788   | 8.9996   | 0.0860  | 0.379307 |
| <i>Gm20605</i>       | chr5:137629174-137642899  | 47.4670  | 46.1924  | -0.0393 | 0.735376 |
| <i>Grk5</i>          | chr19:60889748-61092553   | 1.4952   | 1.6539   | 0.1456  | 0.427875 |
| <i>Mdp1</i>          | chr14:55657878-55660508   | 47.1422  | 45.7331  | -0.0438 | 0.670720 |
| <i>Rom1</i>          | chr19:8927381-8929356     | 4.3628   | 4.8234   | 0.1448  | 0.559835 |
| <i>Txn1</i>          | chr4:57943372-57956411    | 36.4305  | 39.3127  | 0.1098  | 0.575311 |
| <i>Pdhb</i>          | chr14:8165990-8172992     | 34.3933  | 36.2599  | 0.0762  | 0.369359 |
| <i>Tsr1</i>          | chr11:74898070-74909342   | 29.4631  | 30.7043  | 0.0595  | 0.153202 |
| <i>Med1</i>          | chr11:98152153-98193293   | 21.3561  | 22.2769  | 0.0609  | 0.270136 |
| <i>Sdhaf1</i>        | chr7:30321410-30322375    | 28.5811  | 30.5105  | 0.0942  | 0.495629 |
| <i>Gm23262</i>       | chr7:111076059-111076227  | 565.4484 | 642.4392 | 0.1842  | 0.543083 |
| <i>Elp6</i>          | chr9:110305191-110322092  | 3.9199   | 3.7008   | -0.0830 | 0.554131 |
| <i>Myl12b</i>        | chr17:70973919-70990787   | 159.1747 | 154.3193 | -0.0447 | 0.709982 |
| <i>Gm1976</i>        | chr17:94759943-94834799   | 2.6058   | 2.8828   | 0.1457  | 0.505001 |
| <i>Col9a3</i>        | chr2:180597789-180622189  | 1.6288   | 1.5072   | -0.1120 | 0.622955 |
| <i>Tmem101</i>       | chr11:102152545-102156404 | 3.9761   | 3.7327   | -0.0911 | 0.609141 |
| <i>1700109H08Rik</i> | chr5:3571565-3584356      | 11.9832  | 12.9465  | 0.1116  | 0.381548 |
| <i>Fam185a</i>       | chr5:21424957-21482124    | 1.5941   | 1.4887   | -0.0986 | 0.552497 |
| <i>Mkxn2</i>         | chr6:115601937-115618670  | 25.7761  | 25.2867  | -0.0277 | 0.551671 |
| <i>Evi5l</i>         | chr8:4166566-4211257      | 2.4703   | 2.3975   | -0.0432 | 0.582671 |
| <i>Gm17477</i>       | chr9:80118894-80121937    | 7.5062   | 8.0516   | 0.1012  | 0.464876 |
| <i>Fgf13</i>         | chrX:59062144-59568071    | 1.0561   | 1.1926   | 0.1753  | 0.495549 |
| <i>Dhrs1</i>         | chr14:55739019-55745690   | 6.6783   | 6.3581   | -0.0709 | 0.650485 |
| <i>Rpl7l1</i>        | chr17:46773906-46782656   | 35.2212  | 34.3652  | -0.0355 | 0.663157 |
| <i>Foxn2</i>         | chr17:88440710-88490533   | 22.7848  | 22.2320  | -0.0354 | 0.704842 |
| <i>Camsap1</i>       | chr2:25926837-25983282    | 4.9106   | 4.7709   | -0.0416 | 0.678758 |
| <i>Dlgap4</i>        | chr2:156613704-156764363  | 7.3435   | 7.1676   | -0.0350 | 0.711067 |
| <i>Mysm1</i>         | chr4:94942039-94979100    | 24.9668  | 24.5420  | -0.0248 | 0.703398 |
| <i>Exosc9</i>        | chr3:36552605-36565729    | 9.0345   | 9.5836   | 0.0851  | 0.484917 |
| <i>Dtx3</i>          | chr10:127190377-127195728 | 15.1336  | 14.7502  | -0.0370 | 0.641501 |
| <i>Pcif1</i>         | chr2:164879303-164894454  | 31.3527  | 30.7528  | -0.0279 | 0.747704 |
| <i>Tgfb3l</i>        | chr8:4248213-4251423      | 4.3545   | 4.6984   | 0.1097  | 0.135374 |
| <i>Zmat2</i>         | chr18:36793922-36799660   | 26.8370  | 28.5542  | 0.0895  | 0.512605 |
| <i>Zcchc6</i>        | chr13:59771878-59823147   | 52.4753  | 54.5159  | 0.0550  | 0.246957 |
| <i>Dtx1</i>          | chr5:120680201-120711927  | 80.3488  | 77.1994  | -0.0577 | 0.747002 |
| <i>Brd3</i>          | chr2:27445578-27507662    | 6.2851   | 6.6444   | 0.0802  | 0.445811 |
| <i>Gm26819</i>       | chr13:69809913-69816094   | 10.5350  | 11.0635  | 0.0706  | 0.319389 |
| <i>Usp24</i>         | chr4:106316212-106441322  | 28.5485  | 30.1149  | 0.0771  | 0.477403 |
| <i>Asf1b</i>         | chr8:83955506-83970197    | 3.3607   | 3.6603   | 0.1232  | 0.521877 |
| <i>Cd53</i>          | chr3:106758860-106790149  | 393.4545 | 384.2483 | -0.0342 | 0.702747 |

|                      |                           |          |          |         |          |
|----------------------|---------------------------|----------|----------|---------|----------|
| <i>Tnfrsf22</i>      | chr7:143634807-143649661  | 2.7703   | 2.9946   | 0.1123  | 0.464281 |
| <i>Rnf214</i>        | chr9:45863424-45906894    | 6.7573   | 7.1106   | 0.0735  | 0.296159 |
| <i>Gm14681</i>       | chrX:66778441-66778852    | 14.8509  | 16.4603  | 0.1484  | 0.545545 |
| <i>Gm27029</i>       | chr11:101406691-101424796 | 11.3522  | 11.0160  | -0.0434 | 0.470051 |
| <i>Rad17</i>         | chr13:100617164-100651059 | 20.0811  | 19.5417  | -0.0393 | 0.644188 |
| <i>Araf</i>          | chrX:20797813-20860519    | 21.0942  | 22.1190  | 0.0684  | 0.408572 |
| <i>Fam76b</i>        | chr9:13827715-13846541    | 27.1882  | 26.6130  | -0.0309 | 0.683001 |
| <i>Ap2m1</i>         | chr16:20535477-20544909   | 8.9466   | 8.7329   | -0.0349 | 0.539097 |
| <i>NA</i>            | chr4:116033906-116053380  | 5.4715   | 5.2950   | -0.0473 | 0.618137 |
| <i>Samd11</i>        | chr4:156246972-156255338  | 13.4474  | 13.0998  | -0.0378 | 0.662312 |
| <i>Trpm4</i>         | chr7:45303154-45333780    | 1.9135   | 2.1279   | 0.1532  | 0.565418 |
| <i>Dbp</i>           | chr7:45705087-45710155    | 10.2204  | 9.8864   | -0.0479 | 0.633027 |
| <i>Alg9</i>          | chr9:50775018-50843542    | 5.8959   | 6.2243   | 0.0782  | 0.216953 |
| <i>Ddx17</i>         | chr15:79527706-79546741   | 119.0258 | 117.0313 | -0.0244 | 0.742760 |
| <i>Map3k12</i>       | chr15:102497648-102517064 | 5.9296   | 6.2631   | 0.0789  | 0.420557 |
| <i>Itch</i>          | chr2:155133508-155226855  | 20.9378  | 20.5341  | -0.0281 | 0.692338 |
| <i>Add1</i>          | chr5:34573663-34632308    | 93.2464  | 92.2688  | -0.0152 | 0.738991 |
| <i>Aasdhppt</i>      | chr9:4294792-4309494      | 9.3092   | 8.9515   | -0.0565 | 0.626216 |
| <i>Rap2c</i>         | chrX:51003911-51018018    | 21.4779  | 22.6014  | 0.0736  | 0.408065 |
| <i>March6</i>        | chr15:31455898-31531037   | 23.0784  | 24.2005  | 0.0685  | 0.426787 |
| <i>Trav14n-3</i>     | chr14:53370295-53370575   | 19.1274  | 21.1769  | 0.1468  | 0.431675 |
| <i>Luc7l</i>         | chr17:26252909-26285504   | 23.2855  | 22.9168  | -0.0230 | 0.672251 |
| <i>Snord96a</i>      | chr11:48802031-48802112   | 59.5915  | 65.2994  | 0.1320  | 0.349432 |
| <i>Itsn1</i>         | chr16:91729280-91920597   | 0.3002   | 0.2824   | -0.0886 | 0.541975 |
| <i>Itga10</i>        | chr3:96645583-96664519    | 0.9933   | 0.8924   | -0.1545 | 0.654625 |
| <i>Tnfaip1</i>       | chr11:78522849-78536332   | 6.7872   | 7.1987   | 0.0849  | 0.363278 |
| <i>Zbtb14</i>        | chr17:69383049-69390750   | 7.4512   | 7.2300   | -0.0435 | 0.626027 |
| <i>Tjp3</i>          | chr10:81273206-81291267   | 3.0301   | 3.2772   | 0.1131  | 0.394972 |
| <i>Fancl</i>         | chr11:26386134-26471876   | 7.8469   | 8.3010   | 0.0812  | 0.340497 |
| <i>Tsg101</i>        | chr7:46888948-46919969    | 8.1922   | 8.6811   | 0.0836  | 0.314797 |
| <i>Il18r1</i>        | chr1:40465551-40500854    | 25.2790  | 24.0193  | -0.0737 | 0.746911 |
| <i>Pex16</i>         | chr2:92374675-92381217    | 13.6773  | 13.2278  | -0.0482 | 0.570989 |
| <i>Ctdspl2</i>       | chr2:121956000-122013642  | 10.7255  | 10.4430  | -0.0385 | 0.689674 |
| <i>Srp72</i>         | chr5:76974682-76999937    | 25.3628  | 26.4655  | 0.0614  | 0.286178 |
| <i>Dhps</i>          | chr8:85071756-85075162    | 16.7414  | 16.3826  | -0.0313 | 0.555493 |
| <i>Gnal</i>          | chr18:67088335-67226792   | 9.9558   | 10.5006  | 0.0769  | 0.427853 |
| <i>Csde1</i>         | chr3:103020545-103058189  | 133.0323 | 130.1416 | -0.0317 | 0.701087 |
| <i>Lrjf1</i>         | chr3:106684986-106736577  | 12.0092  | 12.5381  | 0.0622  | 0.208522 |
| <i>Slfm1</i>         | chr11:83116848-83122670   | 260.4105 | 273.5274 | 0.0709  | 0.477211 |
| <i>2700089E24Rik</i> | chr6:133105238-133107747  | 21.0307  | 20.2568  | -0.0541 | 0.679661 |
| <i>Fam103a1</i>      | chr7:81762924-81769491    | 2.6835   | 2.9555   | 0.1393  | 0.340945 |
| <i>Pvt1</i>          | chr15:62037985-62378096   | 3.7736   | 3.6181   | -0.0607 | 0.684799 |
| <i>Ldoc1l</i>        | chr15:84553397-84557823   | 3.2571   | 3.0833   | -0.0791 | 0.682272 |
| <i>Unkl</i>          | chr17:25188396-25234443   | 5.5215   | 5.8107   | 0.0737  | 0.218263 |
| <i>Fam98a</i>        | chr17:75537085-75551946   | 7.3491   | 7.0785   | -0.0541 | 0.685061 |
| <i>Arhgef2</i>       | chr3:88607453-88648052    | 18.3988  | 19.4122  | 0.0774  | 0.494149 |
| <i>Pigs</i>          | chr11:78328414-78342782   | 13.5650  | 13.2411  | -0.0349 | 0.637854 |
| <i>Dnajc30</i>       | chr5:135064205-135065365  | 7.7375   | 8.4770   | 0.1317  | 0.508461 |
| <i>BC106179</i>      | chr16:23220655-23225368   | 13.7090  | 14.4024  | 0.0712  | 0.357810 |
| <i>Ywhaq</i>         | chr12:21390070-21417637   | 11.2296  | 10.8992  | -0.0431 | 0.604047 |
| <i>Far1os</i>        | chr7:113530488-113564987  | 4.1362   | 3.8473   | -0.1045 | 0.405123 |
| <i>Ostf1</i>         | chr19:18579327-18631789   | 24.9065  | 24.1940  | -0.0419 | 0.690234 |
| <i>Kif3a</i>         | chr11:53567378-53601967   | 1.7634   | 1.6402   | -0.1044 | 0.629165 |
| <i>Sec14l1</i>       | chr11:117115167-117159268 | 5.9855   | 6.3484   | 0.0849  | 0.504096 |
| <i>Gtf2h1</i>        | chr7:46796102-46823800    | 34.7063  | 33.9746  | -0.0307 | 0.670447 |
| <i>Gm5805</i>        | chr15:81972389-81972845   | 10.8867  | 10.0781  | -0.1113 | 0.543607 |
| <i>Zmiz1os1</i>      | chr14:25455736-25461128   | 1.1006   | 1.2323   | 0.1631  | 0.411213 |
| <i>Tiprl</i>         | chr1:165214921-165236943  | 20.8199  | 20.2085  | -0.0430 | 0.627239 |
| <i>Alg13</i>         | chrX:144317811-144374450  | 1.4797   | 1.5936   | 0.1070  | 0.216778 |
| <i>Pigv</i>          | chr4:133660386-133672647  | 7.7668   | 7.5765   | -0.0358 | 0.659659 |
| <i>Zfp322a</i>       | chr13:23353102-23369208   | 14.8919  | 14.5248  | -0.0360 | 0.667831 |
| <i>Gm10505</i>       | chr17:27342459-27344825   | 3.2612   | 3.5736   | 0.1320  | 0.370793 |
| <i>Ctbs</i>          | chr3:146450469-146465849  | 5.0308   | 5.3832   | 0.0977  | 0.461127 |
| <i>Fam206a</i>       | chr4:56802344-56809601    | 3.1009   | 3.3070   | 0.0929  | 0.374126 |
| <i>Chid1</i>         | chr7:141493135-141539857  | 4.2318   | 4.1129   | -0.0411 | 0.714204 |
| <i>Snx25</i>         | chr8:46033260-46152159    | 11.0597  | 11.6303  | 0.0726  | 0.375394 |
| <i>Dennd6b</i>       | chr15:89182216-89196474   | 7.3189   | 7.1134   | -0.0411 | 0.700319 |
| <i>Sgms1</i>         | chr19:32122726-32389714   | 10.2848  | 10.7206  | 0.0599  | 0.217313 |
| <i>Nceh1</i>         | chr3:27182964-27284608    | 6.7306   | 7.1265   | 0.0825  | 0.450225 |
| <i>Nmnat3</i>        | chr9:98287434-98420527    | 2.5233   | 2.4331   | -0.0526 | 0.535452 |
| <i>Kxd1</i>          | chr8:70508271-70527956    | 16.7612  | 16.3066  | -0.0397 | 0.681010 |

|                      |                           |          |          |         |          |
|----------------------|---------------------------|----------|----------|---------|----------|
| <i>Arhgef3</i>       | chr14:27238038-27403904   | 104.8645 | 102.9561 | -0.0265 | 0.730794 |
| <i>3110009E18Rik</i> | chr1:120121186-120188189  | 1.9480   | 2.1776   | 0.1607  | 0.519577 |
| <i>P4ha1</i>         | chr10:59323295-59373304   | 22.2642  | 23.6541  | 0.0874  | 0.559883 |
| <i>Mmgt2</i>         | chr11:62648663-62666354   | 4.3536   | 4.2093   | -0.0486 | 0.592836 |
| <i>Nfe2l1</i>        | chr11:96817413-96829968   | 16.7082  | 17.5136  | 0.0679  | 0.389380 |
| <i>Dnah17</i>        | chr11:118021722-118129219 | 2.4582   | 2.3834   | -0.0446 | 0.712262 |
| <i>Med28</i>         | chr5:45520220-45529276    | 10.9404  | 10.5840  | -0.0478 | 0.682681 |
| <i>Mtf2</i>          | chr5:108065673-108109004  | 24.1138  | 23.5942  | -0.0314 | 0.686349 |
| <i>Atp5k</i>         | chr5:108433243-108434448  | 46.0618  | 50.4432  | 0.1311  | 0.619124 |
| <i>Rfc3</i>          | chr5:151642755-151651242  | 3.1508   | 3.3741   | 0.0988  | 0.397985 |
| <i>Fam21</i>         | chr6:116208032-116262668  | 44.1538  | 43.5552  | -0.0197 | 0.667029 |
| <i>Fam192a</i>       | chr8:94574942-94601726    | 31.9281  | 31.0540  | -0.0400 | 0.673824 |
| <i>NA</i>            | chr8:109863107-109864203  | 15.1863  | 14.6202  | -0.0548 | 0.611279 |
| <i>Bcor</i>          | chrX:12036739-12160355    | 18.4391  | 19.4993  | 0.0807  | 0.536025 |
| <i>Mbnl3</i>         | chrX:51117268-51206532    | 3.5478   | 3.8039   | 0.1006  | 0.525819 |
| <i>Atrx</i>          | chrX:105797614-105929397  | 44.2364  | 46.0468  | 0.0579  | 0.277328 |
| <i>Gpt</i>           | chr15:76696763-76699674   | 3.8909   | 4.2230   | 0.1181  | 0.366552 |
| <i>Nek4</i>          | chr14:30951485-30987439   | 3.4979   | 3.3196   | -0.0755 | 0.574848 |
| <i>Zfp943</i>        | chr17:21962551-22071168   | 12.1786  | 12.8326  | 0.0755  | 0.472592 |
| <i>Hspa13</i>        | chr16:75755189-75766821   | 3.7950   | 4.0242   | 0.0846  | 0.417502 |
| <i>Scyl3</i>         | chr1:163929099-163955126  | 13.7465  | 14.3280  | 0.0598  | 0.228523 |
| <i>Rock1</i>         | chr18:10064400-10181792   | 53.5353  | 55.8363  | 0.0607  | 0.344658 |
| <i>Matr3</i>         | chr18:35562157-35592045   | 99.6678  | 104.7582 | 0.0719  | 0.470532 |
| <i>Phyh</i>          | chr2:4919018-4938730      | 23.4486  | 24.8431  | 0.0833  | 0.512508 |
| <i>Blvra</i>         | chr2:127070664-127097084  | 8.9541   | 8.6005   | -0.0581 | 0.640960 |
| <i>Gpr171</i>        | chr3:59096447-59101821    | 42.6916  | 41.4381  | -0.0430 | 0.701905 |
| <i>Igsf3</i>         | chr3:101377124-101463060  | 0.8060   | 0.8734   | 0.1157  | 0.032126 |
| <i>Eya3</i>          | chr4:132638986-132724765  | 13.6154  | 14.1917  | 0.0598  | 0.184294 |
| <i>Abracl</i>        | chr10:18011262-18023252   | 108.8983 | 104.3318 | -0.0618 | 0.704863 |
| <i>Hace1</i>         | chr10:45577828-45712345   | 5.0234   | 4.9313   | -0.0267 | 0.634392 |
| <i>Ankrd24</i>       | chr10:81628539-81647610   | 1.1880   | 1.1335   | -0.0677 | 0.593080 |
| <i>Rab21</i>         | chr10:115289862-115315591 | 34.4134  | 33.8311  | -0.0246 | 0.594715 |
| <i>Slc22a5</i>       | chr11:53864541-53891660   | 5.8540   | 5.6499   | -0.0512 | 0.645480 |
| <i>Nme2</i>          | chr11:93949813-93956259   | 41.1804  | 39.4642  | -0.0614 | 0.697723 |
| <i>Lasp1</i>         | chr11:97798999-97838764   | 28.7841  | 28.3204  | -0.0234 | 0.725695 |
| <i>Tmem161b</i>      | chr13:84222295-84295966   | 10.5228  | 11.0922  | 0.0760  | 0.307894 |
| <i>Dimt1</i>         | chr13:106947128-106960224 | 5.8911   | 6.2689   | 0.0897  | 0.353477 |
| <i>Ap1s1</i>         | chr5:137034992-137046135  | 7.5308   | 8.0124   | 0.0894  | 0.375679 |
| <i>Smo</i>           | chr6:29735693-29761365    | 1.0853   | 1.2021   | 0.1475  | 0.392797 |
| <i>Akr1b10</i>       | chr6:34384217-34396950    | 6.1304   | 6.5537   | 0.0963  | 0.524364 |
| <i>Emc3</i>          | chr6:113514873-113531638  | 25.8008  | 25.0401  | -0.0432 | 0.690015 |
| <i>Ankrd27</i>       | chr7:35586246-35639237    | 16.2767  | 16.0281  | -0.0222 | 0.667400 |
| <i>Tspan32</i>       | chr7:143005045-143019644  | 101.6513 | 100.2299 | -0.0203 | 0.723678 |
| <i>Dync2h1</i>       | chr9:6928502-7184446      | 2.1658   | 2.1128   | -0.0357 | 0.665507 |
| <i>Atp2c1</i>        | chr9:105403538-105521257  | 17.7969  | 17.3346  | -0.0380 | 0.714734 |
| <i>Plp2</i>          | chrX:7667940-7671390      | 4.3462   | 4.0562   | -0.0996 | 0.536358 |
| <i>Gpr34</i>         | chrX:13632088-13640858    | 7.1965   | 7.9053   | 0.1355  | 0.629004 |
| <i>Arhgef6</i>       | chrX:57231484-57338729    | 32.0853  | 31.7416  | -0.0155 | 0.655398 |
| <i>NA</i>            | chrX:150408583-150440905  | 3.4562   | 3.8654   | 0.1615  | 0.586125 |
| <i>Gm10101</i>       | chr14:46829108-46832027   | 2.9083   | 2.7147   | -0.0994 | 0.630840 |
| <i>Traj31</i>        | chr14:54187894-54187951   | 151.8495 | 144.4722 | -0.0719 | 0.550778 |
| <i>Ube2i</i>         | chr17:25261915-25274622   | 29.8991  | 29.5113  | -0.0188 | 0.725663 |
| <i>Birc6</i>         | chr17:74528294-74703773   | 39.0595  | 41.0121  | 0.0704  | 0.475307 |
| <i>Arhgap12</i>      | chr18:6024426-6136098     | 10.0301  | 10.5332  | 0.0706  | 0.400995 |
| <i>Plekha3</i>       | chr2:76675280-76696828    | 18.2684  | 17.9397  | -0.0262 | 0.575609 |
| <i>Pofut1</i>        | chr2:153241532-153270247  | 9.2503   | 9.0756   | -0.0275 | 0.743599 |
| <i>Cers2</i>         | chr3:95314791-95323588    | 39.0729  | 40.6786  | 0.0581  | 0.298518 |
| <i>Polr2m</i>        | chr9:71478436-71485935    | 64.0549  | 62.6177  | -0.0327 | 0.694145 |
| <i>Rmnd5a</i>        | chr6:71388633-71440637    | 37.2698  | 36.7348  | -0.0209 | 0.718354 |
| <i>Ptpn6</i>         | chr6:124720706-124738714  | 104.4460 | 102.4936 | -0.0272 | 0.712099 |
| <i>Gm16157</i>       | chr7:68266338-68276594    | 3.8800   | 3.6235   | -0.0987 | 0.524912 |
| <i>Bicd2</i>         | chr13:49341548-49387025   | 14.4133  | 15.1381  | 0.0708  | 0.393928 |
| <i>St7</i>           | chr6:17692932-17943025    | 1.1718   | 1.1204   | -0.0646 | 0.577142 |
| <i>Gm16892</i>       | chr16:57167400-57174413   | 4.6134   | 4.3716   | -0.0777 | 0.524352 |
| <i>Mia3</i>          | chr1:183326724-183369529  | 48.1767  | 47.5808  | -0.0180 | 0.751403 |
| <i>2700016F22Rik</i> | chr4:139376548-139380379  | 7.4293   | 7.8672   | 0.0826  | 0.451578 |
| <i>Akt2</i>          | chr7:27591551-27640826    | 11.1806  | 10.9963  | -0.0240 | 0.691218 |
| <i>Zfp382</i>        | chr7:30121941-30134665    | 7.4255   | 7.8671   | 0.0834  | 0.164554 |
| <i>Gm17354</i>       | chr4:108633842-108637441  | 5.9468   | 6.2863   | 0.0801  | 0.132356 |
| <i>Ube4b</i>         | chr4:149328415-149426749  | 9.4617   | 9.9359   | 0.0706  | 0.398188 |
| <i>Bmp2k</i>         | chr5:96997688-97091867    | 8.2939   | 8.1511   | -0.0251 | 0.663867 |

|                  |                           |          |          |         |          |
|------------------|---------------------------|----------|----------|---------|----------|
| <i>Pex3</i>      | chr10:13523841-13553142   | 7.6831   | 8.0413   | 0.0657  | 0.162525 |
| <i>Ccdc6</i>     | chr10:70097120-70193200   | 11.8509  | 11.6602  | -0.0234 | 0.707010 |
| <i>Arhgap25</i>  | chr6:87458544-87533259    | 47.2137  | 49.1077  | 0.0567  | 0.335785 |
| <i>Nr2c2</i>     | chr6:92091389-92173057    | 31.5414  | 31.1619  | -0.0175 | 0.772887 |
| <i>NA</i>        | chr7:27988274-28014115    | 11.4522  | 11.0639  | -0.0498 | 0.656241 |
| <i>Ddx23</i>     | chr15:98645133-98662889   | 29.8665  | 29.5530  | -0.0152 | 0.726284 |
| <i>Polr2g</i>    | chr19:8793128-8798557     | 50.8360  | 49.1410  | -0.0489 | 0.676368 |
| <i>Swt1</i>      | chr1:151367698-151428455  | 7.6049   | 7.4362   | -0.0324 | 0.670009 |
| <i>Rnf14</i>     | chr18:38296634-38317847   | 29.0843  | 28.6487  | -0.0218 | 0.649975 |
| <i>Eif1a</i>     | chr18:46597703-46610225   | 20.3287  | 21.3196  | 0.0687  | 0.390767 |
| <i>Pxmp4</i>     | chr2:154585757-154603708  | 10.4195  | 10.0563  | -0.0512 | 0.699621 |
| <i>Stxbp3a</i>   | chr3:108793175-108840526  | 12.5418  | 13.0947  | 0.0622  | 0.296672 |
| <i>Tert</i>      | chr13:73627000-73649041   | 1.8948   | 1.7875   | -0.0841 | 0.559747 |
| <i>Casp8ap2</i>  | chr4:32615450-32653265    | 21.9202  | 21.4306  | -0.0326 | 0.701977 |
| <i>Ccng2</i>     | chr5:93267256-93276231    | 24.0014  | 25.2259  | 0.0718  | 0.485401 |
| <i>Slc38a9</i>   | chr13:112660765-112738743 | 5.9709   | 5.8385   | -0.0323 | 0.711824 |
| <i>Anapc13</i>   | chr9:102626295-102634241  | 23.6148  | 25.3948  | 0.1048  | 0.358985 |
| <i>Dnajc17</i>   | chr2:119172499-119208795  | 11.9919  | 11.4514  | -0.0665 | 0.673231 |
| <i>Rnmt1</i>     | chr11:76243714-76250619   | 6.7805   | 6.4844   | -0.0644 | 0.594829 |
| <i>Tob1</i>      | chr11:94211453-94215495   | 8.3169   | 9.0108   | 0.1156  | 0.581709 |
| <i>Socs3</i>     | chr11:117966078-117970047 | 116.7287 | 112.0397 | -0.0591 | 0.748988 |
| <i>Hist1h2ak</i> | chr13:21753394-21753907   | 37.6636  | 40.8947  | 0.1187  | 0.618149 |
| <i>Tubb2a</i>    | chr13:34074300-34078008   | 15.3282  | 14.4928  | -0.0808 | 0.710790 |
| <i>Unc5a</i>     | chr13:54949410-55006018   | 0.9240   | 1.0346   | 0.1631  | 0.491881 |
| <i>Eif2b4</i>    | chr5:31187557-31193430    | 15.3401  | 14.8904  | -0.0429 | 0.686154 |
| <i>Ptcd3</i>     | chr6:71880647-71908762    | 36.8621  | 36.1672  | -0.0275 | 0.677041 |
| <i>Primpol</i>   | chr8:46575578-46617212    | 8.4072   | 8.8377   | 0.0720  | 0.443572 |
| <i>Ubash3b</i>   | chr9:41011097-41161697    | 8.7711   | 9.2562   | 0.0777  | 0.506895 |
| <i>Rap2a</i>     | chr14:120478460-120507194 | 2.0916   | 1.9538   | -0.0984 | 0.619525 |
| <i>Mad2l1bp</i>  | chr17:46147389-46153553   | 16.0871  | 15.6030  | -0.0441 | 0.548169 |
| <i>Snx29</i>     | chr16:11322907-11755472   | 2.9988   | 3.2336   | 0.1088  | 0.571823 |
| <i>Tmem258</i>   | chr19:10204013-10207824   | 31.9034  | 30.8481  | -0.0485 | 0.683618 |
| <i>Ufm1</i>      | chr3:53855211-53863830    | 7.0339   | 7.4631   | 0.0854  | 0.508080 |
| <i>Arhgef39</i>  | chr4:43496141-43499695    | 2.0328   | 2.2510   | 0.1471  | 0.511578 |
| <i>Zfp788</i>    | chr7:41633202-41651534    | 7.3293   | 7.7004   | 0.0712  | 0.285756 |
| <i>Mob3b</i>     | chr4:34949073-35157484    | 1.3307   | 1.2305   | -0.1130 | 0.699056 |
| <i>Lymr7</i>     | chr11:54826865-54860916   | 2.0078   | 2.1729   | 0.1140  | 0.425578 |
| <i>Tlk2</i>      | chr11:105178806-105283959 | 18.6286  | 18.3315  | -0.0232 | 0.687956 |
| <i>Zscan2</i>    | chr7:80860919-80876516    | 11.6350  | 11.3204  | -0.0395 | 0.630091 |
| <i>Mrpl18</i>    | chr17:12911348-12916345   | 24.9577  | 23.9624  | -0.0587 | 0.682823 |
| <i>Ganab</i>     | chr19:8898089-8916663     | 50.3463  | 52.2726  | 0.0542  | 0.282654 |
| <i>Asrgl1</i>    | chr19:9109867-9135636     | 8.3374   | 8.1300   | -0.0363 | 0.645713 |
| <i>Rpl31</i>     | chr1:39367850-39371908    | 27.6933  | 26.9270  | -0.0405 | 0.625424 |
| <i>Stard7</i>    | chr2:127270217-127298932  | 20.8737  | 20.5500  | -0.0225 | 0.676812 |
| <i>Gm14029</i>   | chr2:129182481-129183947  | 5.6092   | 6.0699   | 0.1139  | 0.436268 |
| <i>Ogt</i>       | chrX:101640059-101684351  | 68.5314  | 71.7757  | 0.0667  | 0.492315 |
| <i>Rnaseh2b</i>  | chr14:62292588-62372992   | 3.3910   | 3.6087   | 0.0897  | 0.481915 |
| <i>Brd2</i>      | chr17:34112022-34122634   | 55.4689  | 55.1185  | -0.0091 | 0.769856 |
| <i>Gm11769</i>   | chr11:120150561-120152341 | 2.9706   | 3.2508   | 0.1300  | 0.238081 |
| <i>Setd4</i>     | chr16:93583456-93604063   | 5.9435   | 5.7904   | -0.0376 | 0.629403 |
| <i>Gm14295</i>   | chr2:176798611-176811223  | 1.5878   | 1.7448   | 0.1360  | 0.506627 |
| <i>Purb</i>      | chr11:6467598-6476076     | 41.1550  | 43.1143  | 0.0671  | 0.466121 |
| <i>Zfp62</i>     | chr11:49203291-49218816   | 36.7138  | 38.1691  | 0.0561  | 0.291109 |
| <i>Casc3</i>     | chr11:98804904-98833814   | 19.3245  | 18.9506  | -0.0282 | 0.738350 |
| <i>Sec31a</i>    | chr5:100361648-100416234  | 17.1561  | 16.9650  | -0.0162 | 0.722247 |
| <i>Trbj1-5</i>   | chr6:41535083-41535133    | 194.2882 | 211.1830 | 0.1203  | 0.501026 |
| <i>Sars2</i>     | chr7:28741967-28753879    | 6.8777   | 6.6189   | -0.0553 | 0.652228 |
| <i>Fam175b</i>   | chr7:132859224-132885114  | 11.1957  | 11.7370  | 0.0681  | 0.384143 |
| <i>Rnaseh2a</i>  | chr8:84956609-84969767    | 9.5799   | 9.3659   | -0.0326 | 0.567067 |
| <i>Cbfb</i>      | chr8:105170673-105217986  | 85.6504  | 83.3803  | -0.0388 | 0.722803 |
| <i>Itpr3os</i>   | chr17:27099657-27101440   | 10.7367  | 11.7085  | 0.1250  | 0.461458 |
| <i>Cript</i>     | chr17:87025549-87035810   | 18.2218  | 17.4226  | -0.0647 | 0.695178 |
| <i>Ly9</i>       | chr1:171588623-171607410  | 65.1525  | 64.2630  | -0.0198 | 0.743861 |
| <i>Vaultrc5</i>  | chr18:36801865-36802008   | 32.7562  | 29.2646  | -0.1626 | 0.664621 |
| <i>ligp1</i>     | chr18:60376028-60392627   | 55.3135  | 62.2715  | 0.1709  | 0.548490 |
| <i>Eif5a2</i>    | chr3:28781310-28798846    | 3.7445   | 3.9993   | 0.0950  | 0.540647 |
| <i>Ubiad1</i>    | chr4:148434494-148444771  | 5.3843   | 5.2008   | -0.0500 | 0.571591 |
| <i>Csrnp2</i>    | chr15:100479569-100495239 | 6.4548   | 6.2935   | -0.0365 | 0.619855 |
| <i>Dennd4b</i>   | chr3:90265184-90280669    | 22.1737  | 21.6260  | -0.0361 | 0.766010 |
| <i>Lrrfp2</i>    | chr9:111118110-111225668  | 7.8675   | 8.3484   | 0.0856  | 0.504868 |
| <i>Chd1l</i>     | chr3:97560741-97610203    | 23.9541  | 24.9672  | 0.0598  | 0.234975 |

|                      |                           |          |          |         |          |
|----------------------|---------------------------|----------|----------|---------|----------|
| <i>Dhrs13os</i>      | chr11:78030011-78032665   | 2.5735   | 2.4324   | -0.0814 | 0.596795 |
| <i>Slc31a1</i>       | chr4:62360726-62391769    | 3.1886   | 3.3955   | 0.0907  | 0.204928 |
| <i>Lrrc42</i>        | chr4:107233513-107253532  | 8.6966   | 9.3101   | 0.0984  | 0.464375 |
| <i>Tmem243</i>       | chr5:9100736-9118983      | 36.2615  | 35.1486  | -0.0450 | 0.654920 |
| <i>Gm16793</i>       | chr8:35582571-35588972    | 3.8595   | 3.6595   | -0.0768 | 0.542866 |
| <i>Grhpr</i>         | chr4:44981394-44990734    | 7.1110   | 7.6058   | 0.0970  | 0.235933 |
| <i>Fra10ac1</i>      | chr19:38188480-38224138   | 10.1489  | 10.8748  | 0.0997  | 0.501646 |
| <i>Chmp5</i>         | chr4:40948406-40965303    | 35.7831  | 34.5384  | -0.0511 | 0.705203 |
| <i>Nedd4l</i>        | chr18:64887755-65217826   | 4.3399   | 4.2185   | -0.0409 | 0.723358 |
| <i>Smpd13a</i>       | chr10:57794334-57811830   | 53.2890  | 56.5390  | 0.0854  | 0.589792 |
| <i>Zfp873</i>        | chr10:82058416-82061329   | 9.0051   | 8.6982   | -0.0500 | 0.546366 |
| <i>Bcl11b</i>        | chr12:107910402-108003602 | 81.4155  | 80.0127  | -0.0251 | 0.762867 |
| <i>Eef1g</i>         | chr19:8967040-8978479     | 47.7148  | 46.2418  | -0.0452 | 0.712439 |
| <i>Arfgap2</i>       | chr2:91264973-91276931    | 16.9612  | 16.6555  | -0.0262 | 0.720788 |
| <i>Cdan1</i>         | chr2:120716153-120850128  | 5.6883   | 5.9906   | 0.0747  | 0.464037 |
| <i>Rab2a</i>         | chr4:8535643-8607778      | 50.3453  | 49.5711  | -0.0224 | 0.659238 |
| <i>Trbv13-2</i>      | chr6:41121416-41121832    | 198.9647 | 208.8680 | 0.0701  | 0.414792 |
| <i>Sema4g</i>        | chr19:44989100-45003397   | 1.0065   | 0.9471   | -0.0879 | 0.568572 |
| <i>Ubqln4</i>        | chr3:88553715-88569725    | 17.6343  | 17.3165  | -0.0262 | 0.688862 |
| <i>Cd99l2</i>        | chrX:71420059-71492849    | 4.2353   | 4.5046   | 0.0889  | 0.521751 |
| <i>Osbp9</i>         | chr4:109061144-109202272  | 29.0625  | 28.5793  | -0.0242 | 0.707356 |
| <i>Acyp1</i>         | chr12:85272397-85288438   | 14.2640  | 13.7724  | -0.0506 | 0.631078 |
| <i>Gm5141</i>        | chr13:62773607-62777089   | 5.7361   | 5.3952   | -0.0884 | 0.645996 |
| <i>NA</i>            | chr13:109954108-109955963 | 10.0563  | 9.7550   | -0.0439 | 0.626009 |
| <i>Ahcy12</i>        | chr6:29768010-29912310    | 8.5163   | 8.8398   | 0.0538  | 0.093110 |
| <i>Nudt21</i>        | chr8:94017769-94037021    | 5.2239   | 5.5619   | 0.0904  | 0.394967 |
| <i>Hmbs</i>          | chr9:44336349-44344228    | 9.2200   | 8.8433   | -0.0602 | 0.624502 |
| <i>Senp6</i>         | chr9:80066902-80144953    | 44.4669  | 46.2695  | 0.0573  | 0.355384 |
| <i>Mtcp1</i>         | chrX:75410443-75416588    | 10.7263  | 11.2129  | 0.0640  | 0.247665 |
| <i>Tuba1c</i>        | chr15:99029890-99038105   | 5.6519   | 5.3910   | -0.0682 | 0.571319 |
| <i>Iqcb1</i>         | chr16:36828384-36872721   | 2.0236   | 2.1744   | 0.1037  | 0.502231 |
| <i>Dcp2</i>          | chr18:44380499-44424969   | 17.2554  | 16.9598  | -0.0249 | 0.731388 |
| <i>Clic3</i>         | chr2:25456837-25458776    | 9.5769   | 9.1349   | -0.0682 | 0.594490 |
| <i>4930481B07Rik</i> | chr3:95015624-95020138    | 3.6300   | 3.4276   | -0.0828 | 0.480238 |
| <i>NA</i>            | chr4:108622928-108625216  | 11.3697  | 11.0763  | -0.0377 | 0.610864 |
| <i>Cast</i>          | chr13:74694285-74807921   | 97.9983  | 102.7054 | 0.0677  | 0.492602 |
| <i>Rabgef1</i>       | chr5:130171797-130214342  | 6.8522   | 6.6832   | -0.0360 | 0.575202 |
| <i>Supt5</i>         | chr7:28314897-28338719    | 58.5722  | 57.8751  | -0.0173 | 0.771439 |
| <i>4732440D04Rik</i> | chr1:6213292-6214590      | 14.4742  | 13.5122  | -0.0992 | 0.694355 |
| <i>Pcbp2</i>         | chr15:102470631-102500059 | 30.7527  | 32.3013  | 0.0709  | 0.441328 |
| <i>Ms4a6d</i>        | chr19:11586603-11604849   | 2.6751   | 2.9428   | 0.1376  | 0.456052 |
| <i>Kdm5b</i>         | chr1:134560170-134632877  | 21.6970  | 21.3710  | -0.0218 | 0.760144 |
| <i>Mgat2</i>         | chr12:69184157-69186772   | 44.4895  | 43.5190  | -0.0318 | 0.724234 |
| <i>Simc1</i>         | chr13:54503778-54551290   | 5.1925   | 5.4947   | 0.0816  | 0.449744 |
| <i>Mcm7</i>          | chr5:138164582-138172422  | 16.3049  | 16.0339  | -0.0242 | 0.650718 |
| <i>Zfp526</i>        | chr7:25221450-25227507    | 15.5215  | 15.2521  | -0.0253 | 0.695599 |
| <i>Fam173b</i>       | chr15:31601851-31621227   | 5.7930   | 5.6174   | -0.0444 | 0.707088 |
| <i>4930473A02Rik</i> | chr2:130543790-130563749  | 19.3548  | 20.4982  | 0.0828  | 0.452321 |
| <i>Dnajc14</i>       | chr10:128805675-128819446 | 36.3674  | 35.8598  | -0.0203 | 0.688944 |
| <i>Gm12185</i>       | chr11:48904655-48992226   | 5.4783   | 5.8430   | 0.0930  | 0.527316 |
| <i>Spag7</i>         | chr11:70663770-70669416   | 20.3071  | 19.7691  | -0.0387 | 0.621473 |
| <i>Arhgap27</i>      | chr11:103331496-103363692 | 16.6699  | 17.5705  | 0.0759  | 0.513454 |
| <i>Zfp566</i>        | chr7:30077336-30090527    | 3.1249   | 2.9475   | -0.0843 | 0.477603 |
| <i>Zswim4</i>        | chr8:84210941-84237042    | 9.0474   | 8.8165   | -0.0373 | 0.736679 |
| <i>Ngly1</i>         | chr14:16249279-16311926   | 24.4663  | 23.9558  | -0.0304 | 0.733155 |
| <i>Ass1</i>          | chr2:31470206-31520672    | 19.7446  | 19.2489  | -0.0367 | 0.701577 |
| <i>Cst3</i>          | chr2:148871721-148875692  | 23.2319  | 22.3059  | -0.0587 | 0.682407 |
| <i>Gm20521</i>       | chr14:54883440-54898137   | 60.5840  | 59.4440  | -0.0274 | 0.710446 |
| <i>Gm26759</i>       | chr8:126566969-126590988  | 39.2335  | 41.2553  | 0.0725  | 0.425324 |
| <i>Ppcs</i>          | chr4:119418529-119422420  | 8.8059   | 8.4743   | -0.0554 | 0.506538 |
| <i>Dnah11</i>        | chr12:117877981-118199043 | 0.7905   | 0.7580   | -0.0606 | 0.550196 |
| <i>Zdhhc16</i>       | chr19:41933471-41944095   | 18.2419  | 17.8833  | -0.0286 | 0.453907 |
| <i>Ing5</i>          | chr1:93803964-93822101    | 21.4917  | 21.2338  | -0.0174 | 0.653893 |
| <i>Zfpm1</i>         | chr8:122282140-122337251  | 14.1567  | 15.1043  | 0.0935  | 0.565376 |
| <i>H2-Q7</i>         | chr17:35439154-35443773   | 63.7949  | 67.6927  | 0.0856  | 0.593443 |
| <i>Itm2a</i>         | chrX:107397098-107403376  | 42.4222  | 45.0776  | 0.0876  | 0.539212 |
| <i>0610010F05Rik</i> | chr11:23564960-23633639   | 2.7964   | 2.6943   | -0.0537 | 0.586536 |
| <i>Mcrs1</i>         | chr15:99242817-99251961   | 9.0047   | 8.6872   | -0.0518 | 0.616284 |
| <i>Sept2</i>         | chr1:93478963-93510260    | 26.9562  | 28.1520  | 0.0626  | 0.419327 |
| <i>Cpsf3</i>         | chr12:21286296-21315056   | 61.3589  | 60.6354  | -0.0171 | 0.690534 |
| <i>Ndufa4</i>        | chr6:11900372-11907446    | 123.7461 | 119.0176 | -0.0562 | 0.718263 |



|                      |                           |          |          |         |          |
|----------------------|---------------------------|----------|----------|---------|----------|
| <i>Snrnp27</i>       | chr6:86675220-86684522    | 17.2172  | 16.5256  | -0.0592 | 0.687495 |
| <i>Cln4-2</i>        | chr7:7282315-7299511      | 33.1923  | 32.7707  | -0.0184 | 0.719085 |
| <i>Cnot2</i>         | chr10:116485160-116581511 | 48.9349  | 51.1031  | 0.0625  | 0.382134 |
| <i>Naa38</i>         | chr11:69395486-69396680   | 19.2948  | 18.5159  | -0.0594 | 0.651993 |
| <i>4930430F08Rik</i> | chr10:100572273-100589259 | 3.3856   | 3.6459   | 0.1069  | 0.496113 |
| <i>Rapgef6</i>       | chr11:54522846-54699285   | 99.0005  | 97.9014  | -0.0161 | 0.794209 |
| <i>Dqx1</i>          | chr6:83057843-83067210    | 2.9560   | 3.1927   | 0.1111  | 0.486201 |
| <i>Slc30a5</i>       | chr13:100802648-100833427 | 32.8863  | 32.2296  | -0.0291 | 0.731979 |
| <i>Ttf2</i>          | chr3:100938859-100969663  | 5.0682   | 5.3577   | 0.0801  | 0.484176 |
| <i>Sptbn1</i>        | chr11:30099394-30268175   | 45.7694  | 48.0345  | 0.0697  | 0.532487 |
| <i>Fbxw10</i>        | chr11:62847068-62877465   | 1.3420   | 1.4612   | 0.1228  | 0.340387 |
| <i>Atg4d</i>         | chr9:21265298-21274368    | 39.8096  | 39.2823  | -0.0192 | 0.728997 |
| <i>Mzt1</i>          | chr14:99034543-99046136   | 19.2854  | 20.3046  | 0.0743  | 0.483791 |
| <i>Mina</i>          | chr16:59471774-59492461   | 14.6738  | 15.4153  | 0.0711  | 0.415327 |
| <i>Gm11670</i>       | chr11:108939309-108942015 | 8.6320   | 8.0212   | -0.1059 | 0.629860 |
| <i>Trmt2a</i>        | chr16:18248678-18254772   | 18.6731  | 19.4265  | 0.0571  | 0.224717 |
| <i>Hddc2</i>         | chr10:31313381-31328204   | 6.8962   | 7.3449   | 0.0909  | 0.543678 |
| <i>BC025920</i>      | chr10:81606269-81620703   | 4.0035   | 3.8251   | -0.0658 | 0.694158 |
| <i>Txndc17</i>       | chr11:72207546-72210015   | 29.0728  | 31.0840  | 0.0965  | 0.594868 |
| <i>Mrpl9</i>         | chr3:94443317-94451130    | 22.8417  | 22.4091  | -0.0276 | 0.666318 |
| <i>Nipal1</i>        | chr5:72647795-72671078    | 9.0710   | 8.8288   | -0.0390 | 0.685399 |
| <i>Gpatch4</i>       | chr3:88043107-88055993    | 17.7190  | 17.2405  | -0.0395 | 0.681575 |
| <i>S1pr1</i>         | chr3:115710432-115715055  | 379.9387 | 373.2099 | -0.0258 | 0.754638 |
| <i>Rbm48</i>         | chr5:3583977-3596585      | 14.2435  | 13.9603  | -0.0290 | 0.615811 |
| <i>Trbc1</i>         | chr6:41538217-41539347    | 339.9151 | 334.3046 | -0.0240 | 0.746459 |
| <i>Zfp637</i>        | chr6:117841179-117845956  | 5.4304   | 5.1913   | -0.0650 | 0.621579 |
| <i>C130026I21Rik</i> | chr1:84992689-85270566    | 1.4970   | 1.3421   | -0.1575 | 0.688264 |
| <i>Smim13</i>        | chr13:41249859-41276574   | 4.2300   | 4.0599   | -0.0592 | 0.659693 |
| <i>Xlr4a</i>         | chrX:73074344-73082478    | 12.5426  | 13.3127  | 0.0860  | 0.499903 |
| <i>Smpd5</i>         | chr15:76294433-76296896   | 14.9717  | 14.5411  | -0.0421 | 0.708184 |
| <i>Zfp236</i>        | chr18:82593592-82692883   | 19.3249  | 18.9996  | -0.0245 | 0.771479 |
| <i>Mrpl51</i>        | chr6:125191800-125195583  | 7.2735   | 6.9892   | -0.0575 | 0.675307 |
| <i>Xkr8</i>          | chr4:132724896-132732546  | 2.2286   | 2.3923   | 0.1022  | 0.398984 |
| <i>Atp6v1b2</i>      | chr8:69088645-69113711    | 12.2758  | 12.7865  | 0.0588  | 0.151901 |
| <i>Actr6</i>         | chr10:89711972-89732295   | 20.0749  | 19.4696  | -0.0442 | 0.675804 |
| <i>Poli</i>          | chr18:70508679-70530620   | 14.0991  | 13.9003  | -0.0205 | 0.609816 |
| <i>Caprin1</i>       | chr2:103762940-103797649  | 41.3633  | 40.8652  | -0.0175 | 0.739627 |
| <i>Mcfcd2</i>        | chr17:87254657-87265935   | 10.8604  | 10.5663  | -0.0396 | 0.619462 |
| <i>Cyb5d1</i>        | chr11:69391924-69395631   | 5.7205   | 5.4573   | -0.0680 | 0.511297 |
| <i>Bet1l</i>         | chr7:140853383-140856383  | 20.7230  | 20.1272  | -0.0421 | 0.680473 |
| <i>Papd5</i>         | chr8:88199212-88259722    | 22.3936  | 22.0304  | -0.0236 | 0.726612 |
| <i>Frat2</i>         | chr19:41845977-41848132   | 11.6074  | 11.1455  | -0.0586 | 0.740109 |
| <i>Carf</i>          | chr1:60098246-60151032    | 4.6028   | 4.8806   | 0.0845  | 0.417462 |
| <i>Eprs</i>          | chr1:185363094-185428355  | 53.1571  | 52.4037  | -0.0206 | 0.722262 |
| <i>Dynlrb1</i>       | chr2:155236532-155250277  | 56.3850  | 54.0822  | -0.0602 | 0.724214 |
| <i>Gm6297</i>        | chr4:40720153-40722398    | 1.9546   | 1.7878   | -0.1287 | 0.706147 |
| <i>Meis3</i>         | chr7:16175089-16186510    | 7.4699   | 7.2466   | -0.0438 | 0.684492 |
| <i>Uba3</i>          | chr6:97183669-97205642    | 23.9259  | 23.3724  | -0.0338 | 0.693070 |
| <i>Ncapd2</i>        | chr6:125168008-125191595  | 9.0931   | 9.6398   | 0.0842  | 0.557532 |
| <i>Trit1</i>         | chr4:123016596-123054949  | 14.2252  | 13.8700  | -0.0365 | 0.642778 |
| <i>Cox20</i>         | chr1:178319129-178322693  | 107.7342 | 105.7156 | -0.0273 | 0.724367 |
| <i>Hnf1a</i>         | chr5:114948360-114971067  | 2.0099   | 1.9076   | -0.0753 | 0.614525 |
| <i>Lpin2</i>         | chr17:71182559-71249817   | 4.5968   | 4.8471   | 0.0765  | 0.532862 |
| <i>Eme1</i>          | chr11:94644995-94653964   | 2.8982   | 3.1135   | 0.1034  | 0.372164 |
| <i>Aldh7a1</i>       | chr18:56509686-56572951   | 0.9539   | 1.0379   | 0.1218  | 0.398560 |
| <i>Nipsnap1</i>      | chr11:4873950-4894200     | 10.3084  | 10.0207  | -0.0408 | 0.661895 |
| <i>Mrpl45</i>        | chr11:97315715-97329920   | 9.7064   | 9.3507   | -0.0539 | 0.685389 |
| <i>Rccd1</i>         | chr7:80316595-80324454    | 8.9350   | 8.6893   | -0.0402 | 0.705601 |
| <i>Gm6483</i>        | chr8:19682267-19698275    | 1.3211   | 1.4233   | 0.1075  | 0.473965 |
| <i>Wdr5b</i>         | chr16:36041189-36042973   | 14.0639  | 14.8733  | 0.0807  | 0.501240 |
| <i>Pgrmc2</i>        | chr3:41066325-41083046    | 8.4757   | 8.2658   | -0.0362 | 0.665374 |
| <i>Snrpf</i>         | chr10:93583028-93589706   | 11.6279  | 12.6931  | 0.1265  | 0.600871 |
| <i>Nefh</i>          | chr11:4938753-4948064     | 2.2888   | 2.4992   | 0.1268  | 0.546669 |
| <i>Rnasek</i>        | chr11:70238123-70239842   | 14.2266  | 13.5215  | -0.0733 | 0.697703 |
| <i>Haus5</i>         | chr7:30653710-30664994    | 6.3829   | 6.2112   | -0.0393 | 0.588888 |
| <i>Plekhh1</i>       | chr7:100642891-100662414  | 1.3355   | 1.2582   | -0.0860 | 0.530376 |
| <i>Pkp3</i>          | chr7:141078217-141090510  | 20.6054  | 22.0571  | 0.0982  | 0.649360 |
| <i>Cenpu</i>         | chr8:46552054-46580007    | 5.7681   | 5.5872   | -0.0460 | 0.630591 |
| <i>Abcg1</i>         | chr17:31057697-31115777   | 44.6934  | 44.0257  | -0.0217 | 0.786067 |
| <i>Tnfrsf8l1</i>     | chr17:56162476-56173955   | 16.7242  | 16.4360  | -0.0251 | 0.568996 |
| <i>Prkdc</i>         | chr16:15637865-15842235   | 15.2627  | 14.9913  | -0.0259 | 0.783691 |

|                      |                           |          |          |         |          |
|----------------------|---------------------------|----------|----------|---------|----------|
| <i>Atg3</i>          | chr16:45158784-45188538   | 23.7902  | 23.3549  | -0.0266 | 0.695545 |
| <i>Chuk</i>          | chr19:44073334-44107480   | 25.6625  | 25.2321  | -0.0244 | 0.726316 |
| <i>Ankrd23</i>       | chr1:36530533-36535729    | 9.5847   | 9.2275   | -0.0548 | 0.720310 |
| <i>Plk4</i>          | chr3:40800018-40816883    | 3.4765   | 3.6759   | 0.0805  | 0.435291 |
| <i>1700113A16Rik</i> | chr3:88171559-88177785    | 7.6620   | 8.3625   | 0.1262  | 0.548821 |
| <i>Gm15265</i>       | chr3:94998799-95004869    | 24.7821  | 24.1012  | -0.0402 | 0.670583 |
| <i>Sdcbp</i>         | chr4:6365649-6408423      | 32.5689  | 31.9216  | -0.0290 | 0.736537 |
| <i>Mul1</i>          | chr4:138434670-138442265  | 5.9466   | 5.8097   | -0.0336 | 0.660172 |
| <i>Nfkbiz</i>        | chr16:55811374-55838899   | 27.0558  | 28.2653  | 0.0631  | 0.443094 |
| <i>Zdhhc24</i>       | chr19:4878667-4885397     | 4.2040   | 4.0592   | -0.0506 | 0.597943 |
| <i>Gabarap</i>       | chr11:69991142-69994951   | 76.0474  | 73.5822  | -0.0475 | 0.739146 |
| <i>Wdfy2</i>         | chr14:62837689-62956886   | 7.7975   | 7.5522   | -0.0461 | 0.488713 |
| <i>Ezh1</i>          | chr11:101191114-101226463 | 19.3966  | 19.2444  | -0.0114 | 0.699707 |
| <i>Nr1h2</i>         | chr7:44549615-44553951    | 26.3143  | 25.7904  | -0.0290 | 0.761987 |
| <i>Gm4890</i>        | chr8:79295122-79307685    | 2.0133   | 1.8872   | -0.0933 | 0.496964 |
| <i>Neto2</i>         | chr8:85636587-85690973    | 0.8837   | 0.8264   | -0.0967 | 0.597384 |
| <i>Sf3b1</i>         | chr1:54985168-55027478    | 294.0655 | 289.3961 | -0.0231 | 0.776155 |
| <i>Gpd2</i>          | chr2:57237634-57370719    | 7.0046   | 6.7808   | -0.0468 | 0.733702 |
| <i>4930427A07Rik</i> | chr12:113156420-113165456 | 1.5446   | 1.6920   | 0.1315  | 0.456019 |
| <i>Sh2b3</i>         | chr5:121815487-121836859  | 14.7219  | 15.5464  | 0.0786  | 0.552595 |
| <i>5830462I19Rik</i> | chr9:110372047-110375430  | 8.2118   | 7.9878   | -0.0399 | 0.730683 |
| <i>Gm26675</i>       | chr16:3862383-3884505     | 17.3096  | 16.8835  | -0.0360 | 0.644665 |
| <i>Denr</i>          | chr5:123907174-123928832  | 12.3905  | 13.1987  | 0.0912  | 0.550923 |
| <i>Kif2a</i>         | chr13:106958995-107022126 | 7.2998   | 7.6791   | 0.0731  | 0.487406 |
| <i>Git2</i>          | chr5:114727406-114775517  | 23.2164  | 24.2630  | 0.0636  | 0.467879 |
| <i>Bri3bp</i>        | chr5:125441567-125460872  | 4.7627   | 4.6570   | -0.0324 | 0.684556 |
| <i>Slc25a26</i>      | chr6:94500313-94604648    | 3.8557   | 4.1293   | 0.0989  | 0.103650 |
| <i>Uvrag</i>         | chr7:98886742-99141144    | 24.7396  | 24.3749  | -0.0214 | 0.707650 |
| <i>Banp</i>          | chr8:121949749-122029258  | 9.1007   | 8.7819   | -0.0514 | 0.768164 |
| <i>Tpm1</i>          | chr9:67022589-67049406    | 8.1318   | 7.9570   | -0.0313 | 0.707420 |
| <i>Pdzd11</i>        | chrX:100622882-100626568  | 9.0029   | 9.5461   | 0.0845  | 0.495780 |
| <i>Pycri</i>         | chr15:75916462-75921560   | 9.5555   | 9.2082   | -0.0534 | 0.546337 |
| <i>Rarg</i>          | chr15:102234937-102257517 | 9.5887   | 10.1133  | 0.0769  | 0.511123 |
| <i>Inpp1</i>         | chr1:52789412-52817688    | 37.1859  | 36.6477  | -0.0210 | 0.703841 |
| <i>Zbtb41</i>        | chr1:139422382-139453005  | 8.2286   | 8.1056   | -0.0217 | 0.669189 |
| <i>Mr1</i>           | chr1:155127877-155146780  | 9.3995   | 9.9505   | 0.0822  | 0.508445 |
| <i>Rc3h2</i>         | chr2:37370068-37422903    | 17.0707  | 17.7815  | 0.0589  | 0.420558 |
| <i>Tomm5</i>         | chr4:45105207-45108114    | 9.9436   | 9.4594   | -0.0720 | 0.621454 |
| <i>Gm13157</i>       | chr4:147753973-147809788  | 8.6071   | 9.0964   | 0.0798  | 0.468657 |
| <i>Myl6b</i>         | chr10:128494156-128498685 | 4.3779   | 4.0982   | -0.0952 | 0.569897 |
| <i>2810474O19Rik</i> | chr6:149309413-149335658  | 51.7928  | 53.7920  | 0.0546  | 0.363001 |
| <i>Coa4</i>          | chr7:100537099-100540369  | 6.8336   | 6.5720   | -0.0563 | 0.441085 |
| <i>Gm14085</i>       | chr2:122484940-122528040  | 46.2799  | 44.5833  | -0.0539 | 0.764571 |
| <i>Znrf3</i>         | chr11:5276323-5444847     | 7.8228   | 7.6243   | -0.0371 | 0.765365 |
| <i>H2afx</i>         | chr9:44334714-44336071    | 15.3524  | 14.7948  | -0.0534 | 0.715880 |
| <i>Sf3b6</i>         | chr12:4817607-4827658     | 63.9089  | 61.5002  | -0.0554 | 0.728949 |
| <i>Mterf3</i>        | chr13:66906967-66933088   | 11.8026  | 12.3720  | 0.0680  | 0.425656 |
| <i>Setmar</i>        | chr6:108065044-108077122  | 3.7290   | 3.5344   | -0.0773 | 0.519235 |
| <i>1700058P15Rik</i> | chr7:19258491-19259739    | 14.7317  | 13.9244  | -0.0813 | 0.659049 |
| <i>Bloc1s3</i>       | chr7:19505813-19508331    | 7.1911   | 6.9173   | -0.0560 | 0.586619 |
| <i>Usp54</i>         | chr14:20548911-20618354   | 1.4574   | 1.5578   | 0.0961  | 0.430102 |
| <i>Psemb1</i>        | chr17:15475720-15498276   | 139.9969 | 135.4251 | -0.0479 | 0.741116 |
| <i>Lmnb1</i>         | chr18:56707812-56753424   | 11.5089  | 11.1966  | -0.0397 | 0.735044 |
| <i>Smad2</i>         | chr18:76241579-76305731   | 25.0022  | 24.6658  | -0.0195 | 0.686876 |
| <i>Slc14a1</i>       | chr18:78100090-78142119   | 8.8339   | 9.2533   | 0.0669  | 0.331329 |
| <i>Capn3</i>         | chr2:120456018-120504913  | 2.0440   | 1.9649   | -0.0569 | 0.414477 |
| <i>Gdi2</i>          | chr13:3538074-3566261     | 120.9590 | 127.3035 | 0.0738  | 0.549249 |
| <i>Zfp329</i>        | chr7:12804976-12818858    | 20.7461  | 20.4485  | -0.0208 | 0.731197 |
| <i>Ctdsp2</i>        | chr10:126978716-126999975 | 20.9507  | 22.1145  | 0.0780  | 0.550894 |
| <i>Card11</i>        | chr5:140872998-141000596  | 47.8768  | 50.2807  | 0.0707  | 0.529793 |
| <i>Slc41a3</i>       | chr6:90604724-90646412    | 3.8171   | 3.6584   | -0.0613 | 0.679416 |
| <i>Gng3</i>          | chr19:8836928-8839246     | 2.4753   | 2.7120   | 0.1318  | 0.397225 |
| <i>Spag17</i>        | chr3:99885405-100143322   | 1.0099   | 1.0847   | 0.1030  | 0.433053 |
| <i>Tbck</i>          | chr3:132684143-132838506  | 13.2139  | 13.0348  | -0.0197 | 0.687247 |
| <i>Wtap</i>          | chr17:12966795-12992546   | 23.0550  | 22.7540  | -0.0190 | 0.713664 |
| <i>4933406P04Rik</i> | chr10:20310505-20312294   | 2.6197   | 2.4563   | -0.0929 | 0.621792 |
| <i>Fam120a</i>       | chr13:48879218-48968017   | 73.6492  | 73.1461  | -0.0099 | 0.811763 |
| <i>Gm17122</i>       | chr5:113842600-113843116  | 35.2058  | 33.8873  | -0.0551 | 0.623158 |
| <i>Gadd45a</i>       | chr6:67035095-67037457    | 4.0792   | 4.4645   | 0.1302  | 0.593584 |
| <i>Eed</i>           | chr7:89954655-89980983    | 35.5415  | 35.0852  | -0.0186 | 0.644186 |
| <i>Palb2</i>         | chr7:122107261-122132946  | 1.7587   | 1.8812   | 0.0971  | 0.355967 |

|                      |                           |          |           |         |          |
|----------------------|---------------------------|----------|-----------|---------|----------|
| <i>Otud4</i>         | chr8:79639617-79677724    | 44.8833  | 44.5454   | -0.0109 | 0.800388 |
| <i>Mpzl3</i>         | chr9:45055185-45077436    | 5.8799   | 5.7611    | -0.0294 | 0.701211 |
| <i>Traj24</i>        | chr14:54195637-54195700   | 86.4931  | 95.4108   | 0.1416  | 0.571030 |
| <i>Gm26693</i>       | chr17:32810143-32821697   | 4.5846   | 5.0308    | 0.1340  | 0.530365 |
| <i>Zc3h7a</i>        | chr16:11136591-11176393   | 38.5084  | 38.0250   | -0.0182 | 0.768425 |
| <i>Slk</i>           | chr19:47579677-47645246   | 28.5874  | 29.6904   | 0.0546  | 0.360113 |
| <i>Spg20</i>         | chr3:55112107-55137322    | 7.6760   | 7.5261    | -0.0284 | 0.667319 |
| <i>Gm15471</i>       | chr3:103803128-103808439  | 3.4801   | 3.8204    | 0.1346  | 0.387152 |
| <i>Mob3c</i>         | chr4:115828091-115836185  | 18.5152  | 18.1917   | -0.0254 | 0.697379 |
| <i>NA</i>            | chr4:155409189-155447944  | 1.8548   | 1.2396    | -0.5814 | 0.713039 |
| <i>Wdr45b</i>        | chr11:121327223-121354445 | 9.9046   | 9.7324    | -0.0253 | 0.703679 |
| <i>Tdp2</i>          | chr13:24831678-24842153   | 25.4215  | 24.9916   | -0.0246 | 0.630962 |
| <i>Mfsd10</i>        | chr5:34633641-34637212    | 8.5047   | 8.2860    | -0.0376 | 0.681392 |
| <i>Tmem175</i>       | chr5:108629769-108647770  | 12.0009  | 12.6088   | 0.0713  | 0.511861 |
| <i>Golga3</i>        | chr5:110176700-110226470  | 10.8821  | 10.7711   | -0.0148 | 0.747637 |
| <i>Ankle2</i>        | chr5:110231003-110256651  | 27.8306  | 27.5717   | -0.0135 | 0.713939 |
| <i>Tra2a</i>         | chr6:49243920-49264052    | 28.6786  | 28.0489   | -0.0320 | 0.737470 |
| <i>C87436</i>        | chr6:86438373-86473500    | 11.9560  | 11.7047   | -0.0306 | 0.732606 |
| <i>Gm26982</i>       | chr6:113714970-113716121  | 10.0304  | 10.7995   | 0.1066  | 0.535078 |
| <i>Gm17216</i>       | chr6:148213366-148214573  | 5.8517   | 6.4109    | 0.1317  | 0.411500 |
| <i>Ddx28</i>         | chr8:106009615-106011486  | 9.4871   | 10.2774   | 0.1154  | 0.656103 |
| <i>Ttc33</i>         | chr15:5185524-5218336     | 15.8544  | 15.5021   | -0.0324 | 0.636301 |
| <i>Mir719</i>        | chr14:60228805-60228915   | 88.4701  | 84.9583   | -0.0584 | 0.610306 |
| <i>Sft2d1</i>        | chr17:8311101-8396852     | 8.0433   | 7.8352    | -0.0378 | 0.734815 |
| <i>Gm9974</i>        | chr16:17081998-17082691   | 6.2169   | 5.8117    | -0.0972 | 0.584688 |
| <i>Gnb1l</i>         | chr16:18498767-18566679   | 2.5332   | 2.4193    | -0.0664 | 0.665381 |
| <i>Rab3gap2</i>      | chr1:185204167-185286743  | 13.5008  | 13.3080   | -0.0208 | 0.745091 |
| <i>Secisbp2l</i>     | chr2:125736985-125782870  | 18.0013  | 18.6535   | 0.0513  | 0.236774 |
| <i>Nsfl1c</i>        | chr2:151494181-151511414  | 11.2259  | 11.8003   | 0.0720  | 0.420501 |
| <i>Ergic3</i>        | chr2:156008044-156018279  | 17.7290  | 17.3015   | -0.0352 | 0.714540 |
| <i>Pdcd10</i>        | chr3:75516489-75556856    | 13.4013  | 14.1564   | 0.0791  | 0.527617 |
| <i>Sh3d19</i>        | chr3:85971108-86130526    | 0.9037   | 0.9709    | 0.1035  | 0.306791 |
| <i>Ctss</i>          | chr3:95526785-95556403    | 182.9738 | 191.3636  | 0.0647  | 0.497672 |
| <i>Ppih</i>          | chr4:119300009-119320546  | 4.6511   | 4.4566    | -0.0616 | 0.435886 |
| <i>Itga9</i>         | chr9:118606689-118901003  | 0.6327   | 0.5956    | -0.0873 | 0.395939 |
| <i>Rps26</i>         | chr10:128624529-128626506 | 762.8626 | 705.0688  | -0.1137 | 0.636610 |
| <i>Rpl35a</i>        | chr16:33056452-33060189   | 79.0422  | 73.9795   | -0.0955 | 0.636627 |
| <i>Fam214b</i>       | chr4:43032413-43046220    | 1.1866   | 1.2997    | 0.1314  | 0.482199 |
| <i>Snora74a</i>      | chr18:35557031-35557227   | 883.0622 | 1015.9170 | 0.2022  | 0.560441 |
| <i>Ssh2</i>          | chr11:77216286-77460220   | 29.4865  | 30.6931   | 0.0579  | 0.441983 |
| <i>Ctr9</i>          | chr7:111028950-111056377  | 20.5359  | 20.1893   | -0.0246 | 0.738057 |
| <i>Atp6v1c1</i>      | chr15:38661903-38692443   | 33.3295  | 32.7599   | -0.0249 | 0.691331 |
| <i>Adrb2</i>         | chr18:62177816-62179959   | 23.7897  | 25.1755   | 0.0817  | 0.510147 |
| <i>Utrn</i>          | chr10:12382187-12861735   | 104.9844 | 109.9638  | 0.0669  | 0.555280 |
| <i>Tmbim4</i>        | chr10:120201589-120224917 | 5.2955   | 5.6172    | 0.0851  | 0.451010 |
| <i>Rap1gap2</i>      | chr11:74383355-74590186   | 1.9451   | 2.3276    | 0.2590  | 0.624371 |
| <i>Eid2b</i>         | chr7:28277705-28280129    | 1.8966   | 2.0718    | 0.1275  | 0.345084 |
| <i>Wwp2</i>          | chr8:107436397-107558594  | 23.0753  | 23.9335   | 0.0527  | 0.231418 |
| <i>Sepp1</i>         | chr15:3268546-3280508     | 151.4350 | 146.6292  | -0.0465 | 0.764809 |
| <i>Msrb1</i>         | chr17:24736641-24742778   | 20.0883  | 19.2951   | -0.0581 | 0.721975 |
| <i>Snrpd1</i>        | chr18:10617795-10628230   | 27.5007  | 29.3434   | 0.0936  | 0.573180 |
| <i>Trib3</i>         | chr2:152337421-152344032  | 2.4343   | 2.6889    | 0.1435  | 0.563240 |
| <i>Wars2</i>         | chr3:99141067-99239186    | 3.2956   | 3.1901    | -0.0469 | 0.668384 |
| <i>Ube2d3</i>        | chr3:135438296-135467178  | 100.0482 | 97.2924   | -0.0403 | 0.753835 |
| <i>Adprhl2</i>       | chr4:126316046-126321703  | 17.7104  | 17.3137   | -0.0327 | 0.738452 |
| <i>Ccdc126</i>       | chr6:49319273-49341582    | 5.6008   | 5.4239    | -0.0463 | 0.519693 |
| <i>Gabpa</i>         | chr16:84834924-84863779   | 22.7314  | 23.6921   | 0.0597  | 0.399573 |
| <i>Zfp708</i>        | chr13:67069399-67097976   | 6.8339   | 6.5414    | -0.0631 | 0.698918 |
| <i>A430033K04Rik</i> | chr5:138622858-138648903  | 5.9224   | 5.7587    | -0.0404 | 0.625635 |
| <i>Gm20204</i>       | chr8:117210777-117215997  | 2.2038   | 2.1095    | -0.0631 | 0.740505 |
| <i>Cwf19l2</i>       | chr9:3404084-3479236      | 17.0390  | 17.9515   | 0.0753  | 0.536517 |
| <i>Nckap5l</i>       | chr15:99422034-99457748   | 7.2337   | 6.9601    | -0.0556 | 0.776811 |
| <i>Cbwd1</i>         | chr19:24919915-24961616   | 6.2474   | 5.9880    | -0.0612 | 0.633226 |
| <i>Rad54l2</i>       | chr9:106688081-106789213  | 8.3466   | 8.1772    | -0.0296 | 0.787725 |
| <i>Ttc7b</i>         | chr12:100300770-100520822 | 8.9909   | 8.8035    | -0.0304 | 0.723423 |
| <i>Copb1</i>         | chr7:114215558-114254680  | 50.4119  | 52.3718   | 0.0550  | 0.354857 |
| <i>Cicn6</i>         | chr4:148004258-148038821  | 4.4816   | 4.7573    | 0.0861  | 0.525053 |
| <i>Arcn1</i>         | chr9:44741563-44767845    | 26.1034  | 25.7138   | -0.0217 | 0.745702 |
| <i>Pik3cg</i>        | chr12:32173472-32208659   | 12.4724  | 12.3092   | -0.0190 | 0.778537 |
| <i>Fv1</i>           | chr4:147868978-147870358  | 12.9905  | 12.6870   | -0.0341 | 0.503356 |
| <i>Psemb3</i>        | chr11:97703398-97713500   | 15.3879  | 15.0473   | -0.0323 | 0.694605 |

|                      |                          |          |          |         |          |
|----------------------|--------------------------|----------|----------|---------|----------|
| <i>Psme4</i>         | chr11:30771725-30880361  | 19.6282  | 20.3491  | 0.0520  | 0.265228 |
| <i>Zfp626</i>        | chr7:27810812-27818669   | 16.3678  | 15.8122  | -0.0498 | 0.671495 |
| <i>Lin37</i>         | chr7:30555440-30559838   | 13.2973  | 12.9195  | -0.0416 | 0.664708 |
| <i>Mms22l</i>        | chr4:24496450-24602950   | 3.1303   | 3.3252   | 0.0871  | 0.542311 |
| <i>2010111101Rik</i> | chr13:63014933-63326096  | 10.6692  | 10.4400  | -0.0313 | 0.767094 |
| <i>Vkorc1</i>        | chr7:127893066-127895617 | 7.1548   | 7.8984   | 0.1427  | 0.527939 |
| <i>Dock11</i>        | chrX:35888831-36076562   | 71.0674  | 70.1730  | -0.0183 | 0.779167 |
| <i>Atxn10</i>        | chr15:85336380-85463836  | 31.2214  | 32.5259  | 0.0591  | 0.365354 |
| <i>Rpp14</i>         | chr14:8080366-8091834    | 12.0106  | 11.6183  | -0.0479 | 0.712453 |
| <i>Il17rb</i>        | chr14:29996140-30008896  | 3.8809   | 3.7412   | -0.0529 | 0.683393 |
| <i>Mettl6</i>        | chr14:31478319-31495030  | 15.8878  | 15.5569  | -0.0304 | 0.660527 |
| <i>Pcx</i>           | chr19:4510471-4621752    | 1.2243   | 1.3230   | 0.1119  | 0.194183 |
| <i>Cops5</i>         | chr1:10024601-10038127   | 16.6941  | 16.4617  | -0.0202 | 0.616185 |
| <i>Srp9</i>          | chr1:182124736-182132407 | 24.9681  | 26.2698  | 0.0733  | 0.487819 |
| <i>H13</i>           | chr2:152669460-152708670 | 20.9928  | 20.8573  | -0.0093 | 0.767901 |
| <i>Car2</i>          | chr3:14886425-14900769   | 2.9791   | 3.2764   | 0.1372  | 0.588658 |
| <i>Mns1</i>          | chr9:72438528-72458574   | 5.8592   | 5.5776   | -0.0710 | 0.648035 |
| <i>Teddm2</i>        | chr1:153849541-153900208 | 2.0178   | 2.2265   | 0.1420  | 0.533325 |
| <i>Acn9</i>          | chr6:6956003-7042979     | 0.9703   | 1.0500   | 0.1139  | 0.407647 |
| <i>Atpif1</i>        | chr4:132530554-132533659 | 12.2616  | 13.2388  | 0.1106  | 0.651143 |
| <i>Vdac1</i>         | chr11:52360859-52389397  | 17.8725  | 18.7034  | 0.0656  | 0.414064 |
| <i>Timm22</i>        | chr11:76406951-76416292  | 6.8296   | 6.6445   | -0.0396 | 0.616934 |
| <i>Brip1os</i>       | chr11:86201369-86304443  | 14.9625  | 15.5642  | 0.0569  | 0.323178 |
| <i>Tmem248</i>       | chr5:130219743-130243765 | 21.8943  | 21.6612  | -0.0154 | 0.733782 |
| <i>Gm20422</i>       | chr8:69742861-69774886   | 13.2390  | 12.8866  | -0.0389 | 0.645886 |
| <i>Naa10</i>         | chrX:73916872-73921944   | 18.0374  | 17.7262  | -0.0251 | 0.722111 |
| <i>Ankrd46</i>       | chr15:36477667-36496791  | 18.8635  | 19.6923  | 0.0620  | 0.319933 |
| <i>Gm26782</i>       | chr14:50870363-50879003  | 4.7370   | 4.5110   | -0.0705 | 0.712377 |
| <i>Tm9sf3</i>        | chr19:41210841-41264004  | 74.8737  | 73.5990  | -0.0248 | 0.777216 |
| <i>Stklid1</i>       | chr2:26934046-26953496   | 2.6162   | 2.8461   | 0.1215  | 0.438753 |
| <i>Zhx3</i>          | chr2:160743926-160872998 | 11.7021  | 12.2766  | 0.0691  | 0.545128 |
| <i>Tsc22d2</i>       | chr3:58415688-58466787   | 7.1647   | 7.5567   | 0.0768  | 0.564486 |
| <i>Tgfbr3</i>        | chr5:107106569-107289629 | 24.6626  | 25.7318  | 0.0612  | 0.433055 |
| <i>Ttll3</i>         | chr6:113389259-113414583 | 12.7725  | 12.5302  | -0.0276 | 0.755575 |
| <i>Tmem70</i>        | chr1:16665206-16678275   | 13.9434  | 13.4967  | -0.0470 | 0.725715 |
| <i>Ubr1</i>          | chr2:120860268-120970715 | 18.5848  | 19.3928  | 0.0614  | 0.472863 |
| <i>1110065P20Rik</i> | chr4:124849484-124850730 | 5.8033   | 5.4638   | -0.0870 | 0.615427 |
| <i>1700021F05Rik</i> | chr10:43525120-43540994  | 7.1609   | 6.8533   | -0.0633 | 0.571431 |
| <i>Gatsl3</i>        | chr11:4218224-4222409    | 13.9946  | 13.4243  | -0.0600 | 0.743315 |
| <i>Psmg3</i>         | chr5:139823591-139826885 | 3.9292   | 4.1805   | 0.0894  | 0.381701 |
| <i>Krba1</i>         | chr6:48395585-48419855   | 8.2062   | 8.6486   | 0.0758  | 0.551108 |
| <i>Arl2bp</i>        | chr8:94666754-94674417   | 61.1258  | 60.2184  | -0.0216 | 0.762998 |
| <i>NA</i>            | chr17:12232480-12271184  | 17.2223  | 16.9827  | -0.0202 | 0.713095 |
| <i>Osbpl11</i>       | chr16:33185070-33243311  | 18.3759  | 18.1401  | -0.0186 | 0.756574 |
| <i>Hmgn1</i>         | chr16:96120617-96127729  | 15.1755  | 14.7536  | -0.0407 | 0.737069 |
| <i>Nfkb1</i>         | chr3:135584654-135691547 | 70.3955  | 73.0951  | 0.0543  | 0.400304 |
| <i>Pafah2</i>        | chr4:134396319-134427413 | 1.1970   | 1.1245   | -0.0902 | 0.597554 |
| <i>Zfand2a</i>       | chr5:139471210-139484549 | 8.0877   | 8.4839   | 0.0690  | 0.305420 |
| <i>Pnn</i>           | chr12:59066918-59074017  | 44.0700  | 45.7066  | 0.0526  | 0.243625 |
| <i>Bnip3l</i>        | chr14:66985238-67008877  | 19.9504  | 21.0448  | 0.0770  | 0.573522 |
| <i>Inpp5d</i>        | chr1:87620311-87720507   | 26.4573  | 27.4746  | 0.0544  | 0.343535 |
| <i>Prrg4</i>         | chr2:104830740-104849876 | 1.6588   | 1.8072   | 0.1237  | 0.531650 |
| <i>Pcm1</i>          | chr8:41239758-41334086   | 22.6412  | 23.5094  | 0.0543  | 0.398378 |
| <i>Sla</i>           | chr15:66780818-66831829  | 27.3410  | 28.6337  | 0.0667  | 0.552983 |
| <i>Coa5</i>          | chr1:37417083-37430103   | 26.5294  | 26.0299  | -0.0274 | 0.743894 |
| <i>Dcdc2b</i>        | chr4:129608330-129614257 | 11.6420  | 11.3027  | -0.0427 | 0.671105 |
| <i>Gins2</i>         | chr8:120578632-120589304 | 6.3540   | 6.8282   | 0.1038  | 0.639933 |
| <i>Ifrd1</i>         | chr12:40201566-40248504  | 11.9274  | 11.7514  | -0.0215 | 0.729893 |
| <i>Pi4ka</i>         | chr16:17280350-17406314  | 18.2348  | 18.9673  | 0.0568  | 0.408842 |
| <i>Dand5</i>         | chr8:84815404-84822823   | 4.1324   | 3.8647   | -0.0966 | 0.690108 |
| <i>Lims1</i>         | chr10:58323465-58424691  | 53.0424  | 52.1185  | -0.0254 | 0.775504 |
| <i>Guf1</i>          | chr5:69556923-69575972   | 10.9347  | 11.3941  | 0.0594  | 0.439497 |
| <i>Gal3st4</i>       | chr5:138264920-138272840 | 2.0767   | 1.9842   | -0.0658 | 0.584846 |
| <i>Clec2d</i>        | chr6:129180614-129186534 | 439.0389 | 460.2492 | 0.0681  | 0.554311 |
| <i>Slc10a3</i>       | chrX:74369216-74373349   | 17.1420  | 18.0150  | 0.0717  | 0.486076 |
| <i>Dnajc2</i>        | chr5:21757266-21785251   | 20.4607  | 20.0939  | -0.0261 | 0.742315 |
| <i>Cib1</i>          | chr7:80227155-80232813   | 16.1009  | 15.7382  | -0.0329 | 0.672975 |
| <i>Zfp764</i>        | chr7:127403667-127406822 | 8.2673   | 8.0479   | -0.0388 | 0.664718 |
| <i>Zfp930</i>        | chr8:69226342-69228980   | 15.6135  | 16.4309  | 0.0736  | 0.425899 |
| <i>Calr</i>          | chr8:84841849-84846934   | 153.9672 | 150.9653 | -0.0284 | 0.793351 |
| <i>Ufl1</i>          | chr4:25248599-25281821   | 7.7938   | 7.6586   | -0.0253 | 0.661223 |

|                      |                           |           |           |         |          |
|----------------------|---------------------------|-----------|-----------|---------|----------|
| <i>Adat1</i>         | chr8:111966907-111992302  | 2.8886    | 2.7980    | -0.0459 | 0.662777 |
| <i>Snupn</i>         | chr9:56950877-56983206    | 7.7268    | 7.3136    | -0.0793 | 0.694492 |
| <i>Slamf1</i>        | chr1:171767126-171801184  | 12.7331   | 13.4049   | 0.0742  | 0.539538 |
| <i>Poldip2</i>       | chr11:78512192-78522736   | 9.3709    | 9.7967    | 0.0641  | 0.267500 |
| <i>Gm25994</i>       | chr11:106783170-106783271 | 1196.7947 | 1181.8165 | -0.0182 | 0.784568 |
| <i>Cep170b</i>       | chr12:112722173-112746591 | 1.8949    | 1.8146    | -0.0624 | 0.717672 |
| <i>Srek1</i>         | chr13:103741614-103764504 | 18.2861   | 19.0600   | 0.0598  | 0.429037 |
| <i>NA</i>            | chr5:114812792-114813945  | 6.6887    | 7.3872    | 0.1433  | 0.582639 |
| <i>Lrch4</i>         | chr5:137629120-137641099  | 41.5103   | 40.7167   | -0.0279 | 0.800349 |
| <i>Gm16042</i>       | chr6:8595737-8596988      | 13.6078   | 13.2057   | -0.0433 | 0.729714 |
| <i>Gm16042</i>       | chr6:8595742-8596989      | 13.6514   | 13.2481   | -0.0433 | 0.729714 |
| <i>Ing2</i>          | chr8:47667177-47675556    | 5.4824    | 5.8000    | 0.0812  | 0.359019 |
| <i>Sept7</i>         | chr9:25252438-25308571    | 148.3777  | 156.2890  | 0.0749  | 0.578867 |
| <i>Phf8</i>          | chrX:151520671-151633859  | 8.9008    | 9.2467    | 0.0550  | 0.284524 |
| <i>Cgrrf1</i>        | chr14:46832133-46854193   | 1.9555    | 2.1115    | 0.1107  | 0.404100 |
| <i>Tapbp</i>         | chr17:33915898-33929288   | 108.7778  | 114.3949  | 0.0726  | 0.592064 |
| <i>Tap1</i>          | chr17:34187552-34197225   | 90.5907   | 88.8710   | -0.0277 | 0.811072 |
| <i>Gm15868</i>       | chr16:14311840-14314014   | 11.0814   | 12.2871   | 0.1490  | 0.675509 |
| <i>Nudt22</i>        | chr19:6993017-6996117     | 7.2681    | 6.8916    | -0.0767 | 0.682070 |
| <i>Tgfbra1</i>       | chr1:43047268-43098622    | 8.4058    | 8.8066    | 0.0672  | 0.448519 |
| <i>Smyd3</i>         | chr1:178951959-179518041  | 4.2012    | 4.1166    | -0.0293 | 0.698287 |
| <i>A430110L20Rik</i> | chr1:181225985-181228498  | 2.3487    | 2.5512    | 0.1193  | 0.486813 |
| <i>Zfp438</i>        | chr18:5210030-5334439     | 2.3024    | 2.2006    | -0.0652 | 0.658758 |
| <i>2700094K13Rik</i> | chr2:84669217-84670770    | 19.0199   | 18.4018   | -0.0477 | 0.675851 |
| <i>Gm14325</i>       | chr2:177831790-177840336  | 4.0978    | 3.8309    | -0.0972 | 0.672581 |
| <i>Hadh</i>          | chr3:131233418-131272101  | 8.1513    | 7.9530    | -0.0355 | 0.736934 |
| <i>Gng5</i>          | chr3:146499833-146505572  | 16.6530   | 16.3571   | -0.0259 | 0.691440 |
| <i>Gm5687</i>        | chr18:12898426-12899066   | 6.8807    | 6.4442    | -0.0946 | 0.672067 |
| <i>Tomm34</i>        | chr2:164053539-164071169  | 36.6536   | 36.3669   | -0.0113 | 0.741616 |
| <i>Cyb561d2</i>      | chr9:107539010-107541865  | 11.3174   | 11.0461   | -0.0350 | 0.705129 |
| <i>Pggt1b</i>        | chr18:46239948-46280850   | 9.1691    | 9.6141    | 0.0684  | 0.400553 |
| <i>Itih5</i>         | chr2:10153570-10256529    | 4.1675    | 4.0079    | -0.0563 | 0.765426 |
| <i>Nufip2</i>        | chr11:77686154-77741921   | 51.9060   | 51.4266   | -0.0134 | 0.810234 |
| <i>Map4k1</i>        | chr7:28982853-29003279    | 38.8868   | 38.4578   | -0.0160 | 0.773789 |
| <i>Nucb1</i>         | chr7:45492873-45510406    | 15.1549   | 15.8341   | 0.0633  | 0.491658 |
| <i>Mttr9</i>         | chr14:63523615-63543953   | 14.6074   | 15.2956   | 0.0664  | 0.384801 |
| <i>Ddi2</i>          | chr4:141677548-141723419  | 19.3787   | 19.1348   | -0.0183 | 0.806747 |
| <i>Emi5</i>          | chr12:98786603-98901484   | 8.8706    | 9.2112    | 0.0544  | 0.293466 |
| <i>Ccdc157</i>       | chr11:4141122-4160293     | 2.1832    | 2.3152    | 0.0847  | 0.325910 |
| <i>Echs1</i>         | chr7:140105709-140116476  | 6.2666    | 6.5839    | 0.0713  | 0.505966 |
| <i>Gm15648</i>       | chr16:17152629-17153704   | 18.2240   | 19.2542   | 0.0793  | 0.269098 |
| <i>Cluh</i>          | chr11:74649494-74670847   | 14.2253   | 13.9534   | -0.0278 | 0.803769 |
| <i>Rqcd1</i>         | chr1:74506057-74530844    | 13.8533   | 14.4400   | 0.0598  | 0.286639 |
| <i>Mpv17</i>         | chr5:31140659-31158153    | 5.8293    | 5.6804    | -0.0373 | 0.636639 |
| <i>Mphosph9</i>      | chr5:124250958-124327972  | 8.3319    | 8.6612    | 0.0559  | 0.222912 |
| <i>Gps1</i>          | chr11:120784271-120789102 | 6.8580    | 6.6711    | -0.0399 | 0.669978 |
| <i>Ascc3</i>         | chr10:50592668-50851202   | 36.1501   | 37.4765   | 0.0520  | 0.390588 |
| <i>Asf1a</i>         | chr10:53596960-53609213   | 22.7457   | 23.6516   | 0.0563  | 0.245097 |
| <i>Cyb5d2</i>        | chr11:72777231-72796142   | 2.2243    | 2.3628    | 0.0871  | 0.320170 |
| <i>Pi4k2b</i>        | chr5:52741586-52769344    | 2.3773    | 2.5461    | 0.0989  | 0.501042 |
| <i>Paqr3</i>         | chr5:97082328-97111596    | 2.3242    | 2.2601    | -0.0404 | 0.700516 |
| <i>Faxacb1</i>       | chr9:50768235-50773348    | 3.2175    | 3.4407    | 0.0968  | 0.534077 |
| <i>Pacs1n2</i>       | chr15:83375606-83464606   | 8.9278    | 9.3159    | 0.0614  | 0.204636 |
| <i>Ergic1</i>        | chr17:26561488-26656931   | 4.7316    | 4.9685    | 0.0705  | 0.412372 |
| <i>3300002I08Rik</i> | chr2:150310934-150362765  | 2.6068    | 2.4333    | -0.0994 | 0.691000 |
| <i>Afmid</i>         | chr11:117825923-117839908 | 6.6711    | 7.0394    | 0.0775  | 0.495177 |
| <i>Ccar1</i>         | chr10:62743927-62792368   | 31.7128   | 33.1590   | 0.0643  | 0.481520 |
| <i>Tollip</i>        | chr7:141874812-141918507  | 14.8268   | 14.6072   | -0.0215 | 0.775002 |
| <i>0610038B21Rik</i> | chr8:77518114-77523898    | 2.4500    | 2.6729    | 0.1256  | 0.431266 |
| <i>Slc25a30</i>      | chr14:75761998-75787037   | 20.1942   | 19.7749   | -0.0303 | 0.694112 |
| <i>Nt5c3b</i>        | chr11:100422320-100441808 | 19.6413   | 19.3491   | -0.0216 | 0.727694 |
| <i>Lig4</i>          | chr8:9970019-9977686      | 3.2600    | 3.4938    | 0.0999  | 0.530248 |
| <i>Nkiras1</i>       | chr14:18271135-18283942   | 5.2766    | 5.5197    | 0.0650  | 0.331796 |
| <i>Atf1</i>          | chr15:100227818-100261244 | 7.8447    | 8.3063    | 0.0825  | 0.495174 |
| <i>Col4a3bp</i>      | chr13:96542617-96640167   | 20.3825   | 21.2950   | 0.0632  | 0.509645 |
| <i>Nusap1</i>        | chr2:119618297-119651244  | 2.5668    | 2.9813    | 0.2160  | 0.645698 |
| <i>Rps6ka3</i>       | chrX:159210306-159368244  | 16.9883   | 16.5966   | -0.0337 | 0.794921 |
| <i>Srrd</i>          | chr5:112337391-112343040  | 9.3941    | 9.1082    | -0.0446 | 0.673876 |
| <i>Zfat</i>          | chr15:68083765-68258856   | 2.7561    | 2.6826    | -0.0390 | 0.744337 |
| <i>Dpp4</i>          | chr2:62330072-62412231    | 26.4779   | 27.7426   | 0.0673  | 0.575507 |
| <i>Tasp1</i>         | chr2:139833479-140066805  | 17.4268   | 17.0860   | -0.0285 | 0.747128 |

|                      |                           |          |          |         |          |
|----------------------|---------------------------|----------|----------|---------|----------|
| <i>Pomgnt1</i>       | chr4:116123839-116159849  | 6.3580   | 6.2258   | -0.0303 | 0.755225 |
| <i>Gppb1/1</i>       | chr4:116557657-116593882  | 51.2508  | 50.6013  | -0.0184 | 0.791137 |
| <i>Plekha1</i>       | chr7:130865755-130913312  | 13.0541  | 12.8496  | -0.0228 | 0.770571 |
| <i>March5</i>        | chr19:37207542-37222139   | 19.5097  | 19.2664  | -0.0181 | 0.655825 |
| <i>Casp8</i>         | chr1:58795373-58847503    | 86.1146  | 89.5121  | 0.0558  | 0.431757 |
| <i>Tsn</i>           | chr1:118298516-118311132  | 38.7930  | 38.0805  | -0.0267 | 0.763510 |
| <i>Ckap5</i>         | chr2:91526761-91620664    | 17.6259  | 18.3793  | 0.0604  | 0.503463 |
| <i>Atp5j</i>         | chr16:84827865-84835625   | 13.5505  | 14.2382  | 0.0714  | 0.478542 |
| <i>Hp1bp3</i>        | chr4:138216295-138244683  | 62.2908  | 61.8462  | -0.0103 | 0.788346 |
| <i>Gm23212</i>       | chr1:161036681-161036741  | 271.1842 | 261.3041 | -0.0535 | 0.717802 |
| <i>Med12l</i>        | chr3:59006977-59318410    | 0.5791   | 0.6332   | 0.1288  | 0.582417 |
| <i>St6galnac2</i>    | chr11:116675302-116694868 | 1.2698   | 1.2201   | -0.0576 | 0.648398 |
| <i>Trbv19</i>        | chr6:41178588-41179048    | 77.9182  | 82.8351  | 0.0883  | 0.620958 |
| <i>Tmem30a</i>       | chr9:79768942-79793507    | 31.7925  | 33.1634  | 0.0609  | 0.495055 |
| <i>Trim33</i>        | chr3:103279292-103358768  | 21.8780  | 21.7104  | -0.0111 | 0.782416 |
| <i>Dnd1</i>          | chr18:36763670-36766214   | 3.1365   | 2.9980   | -0.0652 | 0.649344 |
| <i>Pdzd2</i>         | chr15:12357053-12592556   | 0.3813   | 0.4182   | 0.1331  | 0.562253 |
| <i>Rbm34</i>         | chr8:126947174-126971079  | 10.9284  | 11.4263  | 0.0643  | 0.421594 |
| <i>Ubl5</i>          | chr9:20642877-20647140    | 25.8759  | 25.1127  | -0.0432 | 0.768787 |
| <i>Bclaf1</i>        | chr10:20312468-20342501   | 105.2399 | 104.0272 | -0.0167 | 0.792550 |
| <i>Myo19</i>         | chr11:84880147-84911226   | 1.7962   | 1.7444   | -0.0422 | 0.673269 |
| <i>Trbv17</i>        | chr6:41163091-41163551    | 37.9025  | 36.1746  | -0.0673 | 0.698223 |
| <i>4930432K21Rik</i> | chr8:84148024-84172590    | 2.8895   | 2.7263   | -0.0839 | 0.688067 |
| <i>Slc35f2</i>       | chr9:53771534-53818161    | 3.3783   | 3.2304   | -0.0646 | 0.629615 |
| <i>Pars2</i>         | chr4:106651068-106655282  | 6.8416   | 6.6425   | -0.0426 | 0.745847 |
| <i>Gnpda2</i>        | chr5:69573107-69592337    | 8.2037   | 8.5850   | 0.0655  | 0.487133 |
| <i>Trim14</i>        | chr4:46494818-46536141    | 11.7327  | 12.4028  | 0.0801  | 0.560161 |
| <i>Slc39a10</i>      | chr1:46807543-46854046    | 5.7657   | 5.6347   | -0.0332 | 0.729981 |
| <i>Stat6</i>         | chr10:127642985-127660957 | 72.5405  | 72.2058  | -0.0067 | 0.840028 |
| <i>Gemin4</i>        | chr11:76210570-76217664   | 9.6733   | 9.4966   | -0.0266 | 0.731510 |
| <i>D11Wsu47e</i>     | chr11:113684411-113694647 | 9.4542   | 9.9404   | 0.0723  | 0.432588 |
| <i>Fntb</i>          | chr12:76765588-76921412   | 10.2888  | 10.0678  | -0.0313 | 0.726546 |
| <i>Lgals8</i>        | chr13:12439414-12464944   | 26.4585  | 27.5274  | 0.0571  | 0.436156 |
| <i>Zfp458</i>        | chr13:67254917-67269068   | 1.7002   | 1.8562   | 0.1267  | 0.620908 |
| <i>Usp18</i>         | chr6:121245905-121270916  | 26.4578  | 29.7349  | 0.1685  | 0.633498 |
| <i>Rnf113a1</i>      | chrX:37191244-37192462    | 5.4133   | 5.8420   | 0.1099  | 0.527375 |
| <i>Mea1</i>          | chr17:46681136-46683105   | 40.9405  | 39.6609  | -0.0458 | 0.750056 |
| <i>Slc17a9</i>       | chr2:180725262-180742280  | 16.7236  | 16.4002  | -0.0282 | 0.784420 |
| <i>Gm24044</i>       | chr9:120128779-120128935  | 48.8458  | 52.2139  | 0.0962  | 0.323662 |
| <i>Gm26668</i>       | chr11:102863336-103075903 | 1.9340   | 2.0773   | 0.1032  | 0.470553 |
| <i>Rnu3a</i>         | chr10:40258466-40258678   | 241.8803 | 276.5522 | 0.1933  | 0.615417 |
| <i>Metap2</i>        | chr10:93858488-93897093   | 8.5734   | 8.9404   | 0.0605  | 0.418051 |
| <i>Mdm1</i>          | chr10:118141786-118168997 | 3.8324   | 3.6932   | -0.0534 | 0.666682 |
| <i>Hn1</i>           | chr11:115497352-115514387 | 47.6707  | 46.6311  | -0.0318 | 0.771723 |
| <i>Endov</i>         | chr11:119491346-119511437 | 6.1218   | 5.9875   | -0.0320 | 0.790407 |
| <i>Slc12a7</i>       | chr13:73763696-73816743   | 48.2627  | 47.3762  | -0.0267 | 0.820645 |
| <i>Mterf1a</i>       | chr5:3890580-3893933      | 4.4819   | 4.7892   | 0.0957  | 0.557224 |
| <i>Zfp800</i>        | chr6:28239930-28398005    | 18.9899  | 18.6949  | -0.0226 | 0.756814 |
| <i>Trbv20</i>        | chr6:41188272-41188977    | 75.4051  | 71.7086  | -0.0725 | 0.740089 |
| <i>Zfp28</i>         | chr7:6383317-6396633      | 2.4365   | 2.3414   | -0.0574 | 0.614798 |
| <i>Gm21983</i>       | chr7:27168429-27181086    | 22.3812  | 21.9193  | -0.0301 | 0.769675 |
| <i>Ctcf</i>          | chr8:105636567-105682922  | 57.3752  | 59.3413  | 0.0486  | 0.199393 |
| <i>Gm26397</i>       | chr8:126944846-126944980  | 91.1188  | 99.4139  | 0.1257  | 0.692655 |
| <i>Bud13</i>         | chr9:46283007-46298783    | 5.5551   | 5.4474   | -0.0282 | 0.388999 |
| <i>Rps27l</i>        | chr9:66946085-66949516    | 18.5268  | 17.5994  | -0.0741 | 0.722996 |
| <i>Rac2</i>          | chr15:78559168-78572783   | 213.8856 | 210.4205 | -0.0236 | 0.805958 |
| <i>Ap3m1</i>         | chr14:21031441-21052508   | 13.9349  | 14.4932  | 0.0567  | 0.425410 |
| <i>Gm15821</i>       | chr17:34211311-34214459   | 51.3589  | 50.3416  | -0.0289 | 0.802402 |
| <i>Asnsd1</i>        | chr1:53325506-53352752    | 15.1392  | 15.9125  | 0.0719  | 0.570920 |
| <i>Ankzf1</i>        | chr1:75192150-75199387    | 15.3747  | 15.1322  | -0.0229 | 0.773635 |
| <i>Camk4</i>         | chr18:32939040-33195767   | 21.0505  | 20.8547  | -0.0135 | 0.800879 |
| <i>Abl1</i>          | chr2:31688375-31804227    | 9.7930   | 10.2433  | 0.0649  | 0.529836 |
| <i>Alkbh3</i>        | chr2:93980549-94010807    | 10.0297  | 10.5260  | 0.0697  | 0.452791 |
| <i>Gyg</i>           | chr3:20122083-20155317    | 11.0883  | 10.8324  | -0.0337 | 0.718845 |
| <i>Chrn2</i>         | chr3:89753447-89764632    | 2.1119   | 2.0363   | -0.0526 | 0.709963 |
| <i>Kdm4c</i>         | chr4:74242496-74405860    | 19.3755  | 19.1805  | -0.0146 | 0.755417 |
| <i>Rab14</i>         | chr2:35180204-35201120    | 25.3641  | 26.2747  | 0.0509  | 0.293513 |
| <i>Eif2b3</i>        | chr4:117019401-117087306  | 3.4650   | 3.3853   | -0.0336 | 0.700493 |
| <i>Armc1</i>         | chr3:19132145-19163065    | 13.2791  | 12.9804  | -0.0328 | 0.744326 |
| <i>Zfp512</i>        | chr5:31452435-31481749    | 15.7092  | 15.4881  | -0.0204 | 0.753349 |
| <i>Stk26</i>         | chrX:50841046-50893097    | 38.2631  | 37.4131  | -0.0324 | 0.780197 |

|                      |                           |          |          |         |          |
|----------------------|---------------------------|----------|----------|---------|----------|
| <i>Efsec</i>         | chr6:88257333-88446539    | 21.6782  | 21.2061  | -0.0318 | 0.789579 |
| <i>Scamp4</i>        | chr10:80602881-80615783   | 22.1284  | 21.7323  | -0.0261 | 0.781335 |
| <i>Typ23b</i>        | chr11:62879454-62916780   | 9.6341   | 10.1156  | 0.0704  | 0.443081 |
| <i>N4bp2l2</i>       | chr5:150608006-150665612  | 23.6708  | 23.4661  | -0.0125 | 0.810426 |
| <i>Z310044K18Rik</i> | chr7:83659574-83660963    | 8.8669   | 8.3874   | -0.0802 | 0.586690 |
| <i>Tmem183a</i>      | chr1:134346096-134361999  | 21.0699  | 21.8604  | 0.0531  | 0.263993 |
| <i>Hhat</i>          | chr1:192512827-192771213  | 0.6922   | 0.6621   | -0.0640 | 0.632606 |
| <i>Gm12942</i>       | chr4:127123690-127129644  | 7.8751   | 7.6479   | -0.0422 | 0.580807 |
| <i>Ccnh</i>          | chr13:85189407-85223469   | 18.5891  | 19.3252  | 0.0560  | 0.373262 |
| <i>Rps4x</i>         | chrX:102184940-102189394  | 173.4815 | 167.7135 | -0.0488 | 0.777579 |
| <i>1700052N19Rik</i> | chr10:4432466-4455141     | 4.6017   | 4.8203   | 0.0669  | 0.437936 |
| <i>Slc38a6</i>       | chr12:73286778-73354049   | 1.2949   | 1.3919   | 0.1042  | 0.586020 |
| <i>Ccdc176</i>       | chr12:84409070-84433780   | 2.0974   | 1.9768   | -0.0855 | 0.648667 |
| <i>Gm26965</i>       | chr13:67491151-67526151   | 16.8095  | 16.3846  | -0.0369 | 0.709884 |
| <i>Usp38</i>         | chr8:80980733-81014906    | 45.6606  | 45.2236  | -0.0139 | 0.808645 |
| <i>Ccar2</i>         | chr14:70138176-70153811   | 38.1860  | 37.9211  | -0.0100 | 0.787802 |
| <i>Tbp</i>           | chr17:15499887-15528379   | 11.1372  | 11.0654  | -0.0093 | 0.798301 |
| <i>Pim1</i>          | chr17:29490811-29495445   | 90.6345  | 95.5627  | 0.0764  | 0.632141 |
| <i>Scrn3</i>         | chr2:73312600-73337818    | 2.6890   | 2.8329   | 0.0752  | 0.137775 |
| <i>Trip6</i>         | chr5:137309898-137314241  | 2.6646   | 2.8854   | 0.1148  | 0.310639 |
| <i>Fbxl4</i>         | chr4:22357542-22434091    | 9.3049   | 9.0635   | -0.0379 | 0.753141 |
| <i>McpH1</i>         | chr8:18595130-18803189    | 3.3899   | 3.5839   | 0.0803  | 0.553852 |
| <i>6230400D17Rik</i> | chr14:20687235-20703012   | 17.3279  | 18.2119  | 0.0718  | 0.456123 |
| <i>Rfx5</i>          | chr3:94954074-94961561    | 9.3066   | 9.1893   | -0.0183 | 0.746967 |
| <i>Gm16740</i>       | chr3:95217456-95226658    | 11.2937  | 10.8791  | -0.0540 | 0.664202 |
| <i>Atf4</i>          | chr15:80255183-80257540   | 107.6934 | 111.8594 | 0.0548  | 0.408186 |
| <i>Rps6kb1</i>       | chr11:86498870-86544805   | 16.8930  | 16.7386  | -0.0132 | 0.814288 |
| <i>Nup43</i>         | chr10:7667502-7678881     | 9.0546   | 8.7863   | -0.0434 | 0.726674 |
| <i>Ogfod3</i>        | chr11:121177590-121204711 | 3.4465   | 3.2215   | -0.0974 | 0.679194 |
| <i>Utp15</i>         | chr13:98246844-98262992   | 18.6287  | 18.3613  | -0.0209 | 0.779893 |
| <i>Gm24146</i>       | chr5:139844929-139845250  | 25.4844  | 27.3025  | 0.0994  | 0.556993 |
| <i>Baiap2l1</i>      | chr5:144264525-144358112  | 1.2714   | 1.3816   | 0.1199  | 0.359250 |
| <i>Gm26856</i>       | chr7:49856161-49857600    | 5.3869   | 5.7480   | 0.0936  | 0.222015 |
| <i>Chd9</i>          | chr8:90828834-91054508    | 12.6369  | 13.1814  | 0.0609  | 0.511947 |
| <i>Ddx10</i>         | chr9:53098453-53248112    | 31.4114  | 32.7227  | 0.0590  | 0.439098 |
| <i>Rbm15b</i>        | chr9:106880928-106882289  | 18.8583  | 18.4390  | -0.0324 | 0.700578 |
| <i>Ttc5</i>          | chr14:50765414-50785518   | 29.8834  | 29.3381  | -0.0266 | 0.741683 |
| <i>Traj34</i>        | chr14:54184698-54184756   | 73.6632  | 69.0618  | -0.0931 | 0.655106 |
| <i>Rcan1</i>         | chr16:92391952-92466146   | 2.8996   | 3.1388   | 0.1144  | 0.643938 |
| <i>Mavs</i>          | chr2:131234062-131248025  | 8.5750   | 8.3734   | -0.0343 | 0.763961 |
| <i>Tmem64</i>        | chr4:15265830-15286753    | 25.8526  | 25.3389  | -0.0290 | 0.792201 |
| <i>Fkbp3</i>         | chr12:65062435-65073944   | 120.2812 | 116.1337 | -0.0506 | 0.777695 |
| <i>Ccnk</i>          | chr12:108179737-108203359 | 7.7911   | 8.2545   | 0.0833  | 0.572739 |
| <i>Gm10382</i>       | chr5:125389321-125390554  | 4.8086   | 4.5258   | -0.0874 | 0.747307 |
| <i>Nfatc2ip</i>      | chr7:126382853-126396737  | 4.2254   | 4.5077   | 0.0933  | 0.552229 |
| <i>Pin1</i>          | chr9:20652129-20666584    | 8.1450   | 8.0103   | -0.0241 | 0.644550 |
| <i>Slc26a6</i>       | chr9:108854036-108912558  | 4.3303   | 4.6132   | 0.0913  | 0.424534 |
| <i>Tle4</i>          | chr19:14448071-14598051   | 23.7844  | 23.4267  | -0.0219 | 0.795324 |
| <i>Sorbs1</i>        | chr19:40295048-40402267   | 1.9886   | 2.1643   | 0.1222  | 0.591303 |
| <i>Dmxl1</i>         | chr18:49832669-49965473   | 13.0782  | 12.9261  | -0.0169 | 0.826212 |
| <i>Neb</i>           | chr2:52136646-52338798    | 1.7294   | 1.8491   | 0.0965  | 0.658034 |
| <i>PsmD14</i>        | chr2:61711693-61800376    | 29.6766  | 29.0496  | -0.0308 | 0.762686 |
| <i>Apc2</i>          | chr10:80295976-80318263   | 1.1196   | 1.0872   | -0.0423 | 0.728964 |
| <i>Ccdc38</i>        | chr10:93540631-93584327   | 2.7184   | 2.9320   | 0.1091  | 0.633089 |
| <i>Rad50</i>         | chr11:53649518-53707319   | 19.7476  | 19.4679  | -0.0206 | 0.782665 |
| <i>Synj2bp</i>       | chr12:81497940-81532911   | 18.1904  | 17.8491  | -0.0273 | 0.772818 |
| <i>Adam1a</i>        | chr5:121518575-121521695  | 2.4736   | 2.3637   | -0.0655 | 0.725337 |
| <i>Parp12</i>        | chr6:39086409-39118349    | 7.2152   | 7.7071   | 0.0951  | 0.660440 |
| <i>Sympk</i>         | chr7:19024376-19054618    | 19.9707  | 19.7071  | -0.0192 | 0.825234 |
| <i>Frg1</i>          | chr8:41397456-41417118    | 61.9298  | 65.3572  | 0.0777  | 0.613361 |
| <i>4921524J17Rik</i> | chr8:85408758-85432841    | 6.5112   | 6.9291   | 0.0897  | 0.511840 |
| <i>Gramd4</i>        | chr15:86057694-86137634   | 54.0998  | 53.6014  | -0.0134 | 0.850979 |
| <i>Gxylt1</i>        | chr15:93239741-93275161   | 5.4467   | 5.7355   | 0.0745  | 0.532607 |
| <i>Rab2b</i>         | chr14:52261758-52279545   | 5.4516   | 5.3432   | -0.0290 | 0.599949 |
| <i>NA</i>            | chr17:21966174-21968272   | 3.2390   | 3.4787   | 0.1030  | 0.427161 |
| <i>Nelfe</i>         | chr17:34850390-34856372   | 7.1599   | 7.5523   | 0.0770  | 0.403589 |
| <i>Smchd1</i>        | chr17:71344488-71475343   | 38.7929  | 40.2951  | 0.0548  | 0.496083 |
| <i>Pdcl</i>          | chr2:37350073-37359332    | 14.5728  | 14.2217  | -0.0352 | 0.756075 |
| <i>Trp53i11</i>      | chr2:93187547-93201759    | 11.3695  | 11.1776  | -0.0246 | 0.786895 |
| <i>Slc35a3</i>       | chr3:116669468-116712831  | 6.2249   | 6.5031   | 0.0631  | 0.520317 |
| <i>Alg14</i>         | chr3:121291816-121362011  | 8.1583   | 7.7061   | -0.0823 | 0.717162 |

|                      |                           |          |          |         |          |
|----------------------|---------------------------|----------|----------|---------|----------|
| <i>Pnrc1</i>         | chr4:33245422-33290163    | 115.6769 | 121.0658 | 0.0657  | 0.556603 |
| <i>Odf2</i>          | chr2:29889220-29931746    | 10.8219  | 10.7367  | -0.0114 | 0.816104 |
| <i>Crk</i>           | chr11:75679258-75706908   | 23.7230  | 23.4992  | -0.0137 | 0.810098 |
| <i>Zfp455</i>        | chr13:67194505-67209298   | 2.6032   | 2.7847   | 0.0972  | 0.341791 |
| <i>Fbxo24</i>        | chr5:137612502-137629002  | 2.4324   | 2.3040   | -0.0782 | 0.700178 |
| <i>Ej4e3</i>         | chr6:99625134-99666771    | 9.3862   | 9.1420   | -0.0380 | 0.713927 |
| <i>Gprc5b</i>        | chr7:118972039-118995211  | 1.9053   | 1.7883   | -0.0915 | 0.749845 |
| <i>Sc5d</i>          | chr9:42254176-42264300    | 27.8193  | 27.3177  | -0.0263 | 0.768885 |
| <i>H2-DMa</i>        | chr17:34135181-34139101   | 17.6128  | 17.0827  | -0.0441 | 0.756180 |
| <i>Cenpq</i>         | chr17:40923050-40935047   | 13.3551  | 14.0297  | 0.0711  | 0.555719 |
| <i>1110054M08Rik</i> | chr16:24391611-24393588   | 3.6695   | 3.4667   | -0.0820 | 0.683900 |
| <i>Mrpl39</i>        | chr16:84717575-84735742   | 16.7492  | 16.3484  | -0.0349 | 0.748303 |
| <i>Rcl1</i>          | chr19:29101374-29143843   | 18.3229  | 17.9995  | -0.0257 | 0.756173 |
| <i>Tcea1</i>         | chr1:4857813-4897909      | 8.7006   | 9.1682   | 0.0755  | 0.507380 |
| <i>Gpr21</i>         | chr2:37516331-37520603    | 1.2555   | 1.3756   | 0.1318  | 0.552117 |
| <i>Cse1l</i>         | chr2:166906039-166946389  | 21.4957  | 22.3476  | 0.0561  | 0.423064 |
| <i>Tbc1d1</i>        | chr5:64159450-64351486    | 30.7215  | 30.5541  | -0.0079 | 0.839602 |
| <i>Ubald1</i>        | chr16:4874777-4880315     | 11.4110  | 11.1336  | -0.0355 | 0.803635 |
| <i>Rps28</i>         | chr17:33819026-33824562   | 76.7420  | 72.0980  | -0.0901 | 0.680461 |
| <i>lqce</i>          | chr5:140661826-140702378  | 4.1257   | 4.3051   | 0.0614  | 0.375919 |
| <i>Gm11478</i>       | chr11:86630427-86631026   | 17.0039  | 16.0156  | -0.0864 | 0.732205 |
| <i>6530402F18Rik</i> | chr2:29245106-29253006    | 4.4944   | 4.3959   | -0.0319 | 0.749149 |
| <i>Srrt</i>          | chr5:137295703-137307674  | 70.5468  | 69.6104  | -0.0193 | 0.814912 |
| <i>Alkbh6</i>        | chr7:30308716-30314304    | 7.8885   | 8.2686   | 0.0679  | 0.384600 |
| <i>Pdk3</i>          | chrX:93764606-93832201    | 8.7226   | 9.1415   | 0.0677  | 0.383763 |
| <i>BC065397</i>      | chrX:136741823-136803364  | 3.6851   | 3.9066   | 0.0842  | 0.381183 |
| <i>Gtpbp8</i>        | chr16:44736767-44746363   | 16.7076  | 17.4003  | 0.0586  | 0.400186 |
| <i>Znf512b</i>       | chr2:181582102-181592803  | 17.2995  | 18.0931  | 0.0647  | 0.557222 |
| <i>Vps45</i>         | chr3:95999831-96058466    | 5.0409   | 5.2873   | 0.0688  | 0.322197 |
| <i>Cc2d1a</i>        | chr8:84132827-84147936    | 13.3326  | 14.0617  | 0.0768  | 0.588213 |
| <i>Akap12</i>        | chr10:4266328-4359468     | 4.2314   | 4.1348   | -0.0333 | 0.724772 |
| <i>ltfg1</i>         | chr8:85717556-85840949    | 24.5629  | 24.1021  | -0.0273 | 0.793657 |
| <i>Cops3</i>         | chr11:59817794-59839838   | 25.7296  | 25.3152  | -0.0234 | 0.774649 |
| <i>Rhot1</i>         | chr11:80209018-80267907   | 12.3716  | 12.2242  | -0.0173 | 0.755212 |
| <i>Zfp687</i>        | chr3:95006589-95015448    | 13.6366  | 14.3116  | 0.0697  | 0.580009 |
| <i>1110034G24Rik</i> | chr2:132686930-132751055  | 10.0120  | 9.7882   | -0.0326 | 0.664115 |
| <i>Ndufs6</i>        | chr13:73319837-73328542   | 19.5929  | 18.7380  | -0.0644 | 0.743676 |
| <i>4930503L19Rik</i> | chr18:70453139-70472480   | 10.1788  | 10.7376  | 0.0771  | 0.573879 |
| <i>Anapc4</i>        | chr5:52834014-52867797    | 14.6406  | 15.1551  | 0.0498  | 0.240061 |
| <i>Galc</i>          | chr12:98202303-98259459   | 1.1036   | 1.2022   | 0.1234  | 0.378477 |
| <i>2310061I04Rik</i> | chr17:35892676-35897431   | 3.5651   | 3.8197   | 0.0995  | 0.494614 |
| <i>Wrap53</i>        | chr11:69561757-69580255   | 10.6199  | 10.3575  | -0.0361 | 0.746279 |
| <i>Btbd7</i>         | chr12:102784655-102878406 | 19.7198  | 19.4355  | -0.0210 | 0.796748 |
| <i>Zbtb4</i>         | chr11:69765911-69784023   | 19.6148  | 19.4611  | -0.0113 | 0.852312 |
| <i>Ankrd49</i>       | chr9:14780208-14782964    | 21.7380  | 21.1320  | -0.0408 | 0.753010 |
| <i>Qars</i>          | chr9:108508004-108515941  | 22.5334  | 23.3933  | 0.0540  | 0.394974 |
| <i>Telo2</i>         | chr17:25099569-25115967   | 4.6386   | 4.5472   | -0.0287 | 0.771488 |
| <i>Mutyh</i>         | chr4:116807722-116819440  | 5.3497   | 5.2113   | -0.0378 | 0.536498 |
| <i>A730071L15Rik</i> | chr11:6200028-6201643     | 3.8626   | 3.6949   | -0.0640 | 0.501863 |
| <i>Nup88</i>         | chr11:70943057-70969973   | 14.3457  | 14.2684  | -0.0078 | 0.711999 |
| <i>Psmc12</i>        | chr11:107479483-107504362 | 18.4134  | 19.2212  | 0.0619  | 0.469052 |
| <i>Tmx1</i>          | chr12:70453094-70468040   | 22.6112  | 22.1432  | -0.0302 | 0.777322 |
| <i>Ppm1a</i>         | chr12:72761210-72794940   | 34.7554  | 34.3325  | -0.0177 | 0.768194 |
| <i>Numb</i>          | chr12:83794033-83921934   | 17.1804  | 16.9056  | -0.0233 | 0.783870 |
| <i>Secisbp2</i>      | chr13:51651696-51684044   | 17.9158  | 18.5989  | 0.0540  | 0.398636 |
| <i>Ttc37</i>         | chr13:76098733-76187983   | 16.5042  | 16.2908  | -0.0188 | 0.799916 |
| <i>F2rl1</i>         | chr13:95511731-95525240   | 11.6368  | 12.3193  | 0.0822  | 0.643239 |
| <i>Bdp1</i>          | chr13:100017993-100104070 | 22.4905  | 23.3195  | 0.0522  | 0.407563 |
| <i>Paxip1</i>        | chr5:27740666-27791339    | 9.3200   | 9.2118   | -0.0169 | 0.772328 |
| <i>Grsf1</i>         | chr5:88659447-88676171    | 17.0271  | 17.7825  | 0.0626  | 0.462249 |
| <i>Trbv16</i>        | chr6:41151790-41152225    | 97.7564  | 94.9755  | -0.0416 | 0.754516 |
| <i>Avl9</i>          | chr6:56714926-56761911    | 25.1566  | 25.0072  | -0.0086 | 0.822586 |
| <i>Rpl28</i>         | chr7:4792873-4794562      | 3.9219   | 4.2955   | 0.1312  | 0.511151 |
| <i>Swap70</i>        | chr7:110221702-110283503  | 4.0645   | 3.9441   | -0.0434 | 0.713698 |
| <i>6820431F20Rik</i> | chr8:20262612-20297546    | 0.7000   | 0.6651   | -0.0738 | 0.685238 |
| <i>Rnf170</i>        | chr8:26119367-26143871    | 4.2115   | 4.4358   | 0.0749  | 0.533985 |
| <i>Cdc37</i>         | chr9:21138540-21149906    | 60.3835  | 59.2439  | -0.0275 | 0.811474 |
| <i>Gm16124</i>       | chr9:53667245-53681265    | 15.4038  | 14.7843  | -0.0592 | 0.637967 |
| <i>Abcb7</i>         | chrX:104280656-104413856  | 17.7836  | 17.4845  | -0.0245 | 0.786770 |
| <i>Wdr90</i>         | chr17:25844770-25861501   | 2.3946   | 2.3396   | -0.0335 | 0.737659 |
| <i>Trmt112</i>       | chr19:6909697-6911049     | 10.5256  | 10.2448  | -0.0390 | 0.640491 |



|                      |                           |         |          |         |          |
|----------------------|---------------------------|---------|----------|---------|----------|
| <i>Kansl3</i>        | chr1:36335729-36369181    | 21.1569 | 20.9060  | -0.0172 | 0.825819 |
| <i>Mjff</i>          | chr1:82724889-82752394    | 22.1977 | 21.8428  | -0.0233 | 0.778191 |
| <i>St6galnac4</i>    | chr2:32587094-32599698    | 6.0279  | 6.3742   | 0.0806  | 0.584634 |
| <i>Ivd</i>           | chr2:118861953-118882909  | 11.0216 | 10.8671  | -0.0204 | 0.793476 |
| <i>Ppp1r16b</i>      | chr2:158665397-158766334  | 14.6440 | 15.1887  | 0.0527  | 0.371800 |
| <i>Gm17641</i>       | chr3:68867916-68870266    | 2.0159  | 1.8929   | -0.0909 | 0.671563 |
| <i>Magi3</i>         | chr3:104013258-104220374  | 8.5279  | 8.8677   | 0.0564  | 0.322923 |
| <i>Lamtor5</i>       | chr3:107278857-107284079  | 16.1643 | 17.2116  | 0.0906  | 0.619749 |
| <i>Pigk</i>          | chr3:152714099-152980408  | 7.3956  | 7.2975   | -0.0193 | 0.790476 |
| <i>Gmeb1</i>         | chr4:132221024-132261602  | 5.0198  | 4.9510   | -0.0199 | 0.709140 |
| <i>Gm17195</i>       | chr12:79163407-79163835   | 11.5728 | 10.9724  | -0.0769 | 0.585018 |
| <i>Atg2b</i>         | chr12:105613538-105685241 | 14.9754 | 15.5535  | 0.0546  | 0.449754 |
| <i>Plbd2</i>         | chr5:120483281-120503625  | 2.8731  | 2.7703   | -0.0526 | 0.791155 |
| <i>2310045N01Rik</i> | chr8:70139498-70167488    | 13.5245 | 14.1192  | 0.0621  | 0.442465 |
| <i>Gm16185</i>       | chr9:97085325-97088610    | 9.6913  | 10.1873  | 0.0720  | 0.582161 |
| <i>Flnb</i>          | chr14:7817956-7951588     | 19.3952 | 19.0327  | -0.0272 | 0.829634 |
| <i>Mrpl43</i>        | chr19:45005013-45006442   | 29.3217 | 28.5830  | -0.0368 | 0.756411 |
| <i>Mcmdc2</i>        | chr1:9908637-9942085      | 1.5999  | 1.5336   | -0.0610 | 0.658696 |
| <i>Paip2</i>         | chr18:35598616-35617186   | 57.9467 | 61.1978  | 0.0788  | 0.639053 |
| <i>Ccdc94</i>        | chr17:55959186-55967949   | 15.5626 | 16.2926  | 0.0661  | 0.125726 |
| <i>Lta4h</i>         | chr10:93453395-93484896   | 66.2927 | 65.4076  | -0.0194 | 0.792166 |
| <i>Supt6</i>         | chr11:78206745-78245987   | 32.8682 | 34.0407  | 0.0506  | 0.413187 |
| <i>Mnat1</i>         | chr12:73123716-73273988   | 8.8374  | 9.2575   | 0.0670  | 0.440322 |
| <i>C1galt1</i>       | chr6:7844841-7872047      | 29.5546 | 29.1660  | -0.0191 | 0.767647 |
| <i>4921507P07Rik</i> | chr6:50573301-50596632    | 1.7819  | 1.9257   | 0.1120  | 0.468946 |
| <i>Tbx6</i>          | chr7:126781482-126785560  | 7.6697  | 7.4384   | -0.0442 | 0.772005 |
| <i>Armc5</i>         | chr7:128237356-128245100  | 7.0665  | 7.4306   | 0.0725  | 0.503315 |
| <i>9530027J09Rik</i> | chrX:48276791-48285426    | 13.9444 | 14.7225  | 0.0783  | 0.572800 |
| <i>Ttc3</i>          | chr16:94370617-94469222   | 18.1677 | 18.7755  | 0.0475  | 0.264174 |
| <i>Syvn1</i>         | chr19:6046575-6053712     | 7.1053  | 7.5115   | 0.0802  | 0.586661 |
| <i>Tommm22</i>       | chr15:79670860-79672862   | 71.6185 | 70.0699  | -0.0315 | 0.774120 |
| <i>Ndc1</i>          | chr4:107367783-107416346  | 4.3677  | 4.2408   | -0.0425 | 0.755430 |
| <i>Glimp</i>         | chr3:88325022-88331313    | 9.9179  | 9.8043   | -0.0166 | 0.778611 |
| <i>Mbd3</i>          | chr10:80392538-80399550   | 17.2885 | 16.9350  | -0.0298 | 0.796934 |
| <i>Agpat1</i>        | chr17:34604261-34613449   | 17.3914 | 17.1646  | -0.0189 | 0.777015 |
| <i>Trp53inp1</i>     | chr4:11156430-11174379    | 98.6662 | 102.5907 | 0.0563  | 0.524143 |
| <i>Slc30a4</i>       | chr2:122681232-122702663  | 11.3709 | 11.0226  | -0.0449 | 0.805025 |
| <i>Mtmt11</i>        | chr3:96162003-96171718    | 3.8726  | 3.7272   | -0.0552 | 0.756927 |
| <i>Actr10</i>        | chr12:70937856-70964718   | 19.9760 | 20.7569  | 0.0553  | 0.414638 |
| <i>Mrps31</i>        | chr8:22411339-22429665    | 14.9272 | 14.3749  | -0.0544 | 0.743944 |
| <i>Stag2</i>         | chrX:42149316-42277185    | 66.1021 | 68.5820  | 0.0531  | 0.455037 |
| <i>Abhd17b</i>       | chr19:21653308-21685637   | 13.8910 | 13.5619  | -0.0346 | 0.750311 |
| <i>Cox5a</i>         | chr9:57521231-57532424    | 51.2485 | 49.7746  | -0.0421 | 0.763110 |
| <i>Oxnad1</i>        | chr14:32085373-32103202   | 3.7913  | 3.6937   | -0.0376 | 0.763666 |
| <i>Arpc3</i>         | chr5:122391877-122406179  | 67.3927 | 65.6160  | -0.0385 | 0.790851 |
| <i>Tnks</i>          | chr8:34829178-34965690    | 10.3476 | 10.1784  | -0.0238 | 0.829760 |
| <i>Cmtm3</i>         | chr8:104340593-104347672  | 4.2702  | 4.0868   | -0.0633 | 0.671048 |
| <i>Gm9917</i>        | chr9:107558809-107568415  | 10.0270 | 9.8690   | -0.0229 | 0.761436 |
| <i>Gm9843</i>        | chr16:76403208-76403712   | 16.4767 | 15.6594  | -0.0734 | 0.697294 |
| <i>Ranbp6</i>        | chr19:29808107-29812974   | 23.8733 | 23.5578  | -0.0192 | 0.789570 |
| <i>Nucks1</i>        | chr1:131910457-131936321  | 45.0495 | 46.6705  | 0.0510  | 0.417716 |
| <i>Pigc</i>          | chr1:161969185-162027106  | 7.9825  | 7.8423   | -0.0256 | 0.713206 |
| <i>Mrps2</i>         | chr2:28468065-28471178    | 11.0214 | 10.8009  | -0.0292 | 0.761950 |
| <i>Sass6</i>         | chr3:116595007-116630984  | 2.6110  | 2.7726   | 0.0867  | 0.458448 |
| <i>Psmid9</i>        | chr5:123228189-123250131  | 4.3577  | 4.5838   | 0.0730  | 0.437525 |
| <i>Ddx39</i>         | chr8:83715176-83726892    | 56.2059 | 58.1160  | 0.0482  | 0.400169 |
| <i>Gm4956</i>        | chr1:21285245-21298312    | 4.6341  | 5.0082   | 0.1120  | 0.594992 |
| <i>Gpatch2</i>       | chr1:187215507-187351704  | 7.7566  | 7.6680   | -0.0166 | 0.826248 |
| <i>Kdm6bos</i>       | chr11:69401512-69402700   | 4.5920  | 4.9949   | 0.1213  | 0.392667 |
| <i>Lipe</i>          | chr7:25379526-25398710    | 5.1997  | 5.4705   | 0.0733  | 0.519204 |
| <i>A930029G22Rik</i> | chr17:69416659-69439304   | 3.3595  | 3.2070   | -0.0670 | 0.614105 |
| <i>R3hdm4</i>        | chr10:79910052-79917006   | 24.2495 | 25.3758  | 0.0655  | 0.486926 |
| <i>Acy1</i>          | chr9:106432995-106438236  | 7.6078  | 7.3330   | -0.0531 | 0.724571 |
| <i>Slc39a1</i>       | chr3:90248171-90253612    | 9.2806  | 9.7401   | 0.0697  | 0.440990 |
| <i>Tmem57</i>        | chr4:134802758-134853345  | 10.8025 | 11.2658  | 0.0606  | 0.533999 |
| <i>Osbpl8</i>        | chr10:111164801-111297247 | 57.1947 | 56.4175  | -0.0197 | 0.820017 |
| <i>Nfix</i>          | chr8:84699875-84800344    | 2.3521  | 2.2924   | -0.0372 | 0.738255 |
| <i>Phkg2</i>         | chr7:127573339-127583305  | 17.6206 | 17.4252  | -0.0161 | 0.776826 |
| <i>Far2</i>          | chr6:148047258-148182758  | 5.9820  | 6.2454   | 0.0622  | 0.415066 |
| <i>Tmem251</i>       | chr12:102743759-102747561 | 9.3663  | 9.7970   | 0.0649  | 0.438569 |
| <i>Zfand2b</i>       | chr1:75168645-75171629    | 15.7106 | 16.5130  | 0.0719  | 0.545366 |

|                      |                           |          |          |         |          |
|----------------------|---------------------------|----------|----------|---------|----------|
| <i>Atg13</i>         | chr2:91674617-91710576    | 7.8272   | 7.6901   | -0.0255 | 0.795955 |
| <i>Bicap</i>         | chr2:157556361-157571274  | 5.2244   | 5.1107   | -0.0317 | 0.693144 |
| <i>Ints8</i>         | chr4:11199157-11254258    | 8.6584   | 9.0177   | 0.0587  | 0.431434 |
| <i>Tesk1</i>         | chr4:43441938-43448064    | 10.0183  | 9.8255   | -0.0280 | 0.817308 |
| <i>Rps6ka4</i>       | chr19:6829084-6840601     | 13.2635  | 13.1028  | -0.0176 | 0.790458 |
| <i>Ddx1</i>          | chr12:13219307-13249213   | 36.1349  | 35.7411  | -0.0158 | 0.794232 |
| <i>Gm26529</i>       | chr7:89980748-89981848    | 4.8408   | 4.6321   | -0.0636 | 0.558619 |
| <i>Plcl1</i>         | chr1:55406387-55751802    | 1.4205   | 1.5542   | 0.1298  | 0.634136 |
| <i>Rps19bp1</i>      | chr15:80260613-80264306   | 11.7112  | 11.2863  | -0.0533 | 0.692164 |
| <i>Lmf2</i>          | chr15:89351003-89355659   | 11.2470  | 11.7624  | 0.0646  | 0.425624 |
| <i>Gm20695</i>       | chr16:3884647-3919517     | 26.0922  | 27.2307  | 0.0616  | 0.392555 |
| <i>Cep57</i>         | chr9:13807791-13827107    | 15.5029  | 16.1371  | 0.0578  | 0.480658 |
| <i>Cd28</i>          | chr1:60716799-60773359    | 67.5107  | 70.0873  | 0.0540  | 0.519302 |
| <i>Pstk</i>          | chr7:131371140-131387839  | 11.8756  | 11.6620  | -0.0262 | 0.623680 |
| <i>Thy1</i>          | chr9:44043383-44048579    | 207.8209 | 203.4307 | -0.0308 | 0.817086 |
| <i>Hdac1</i>         | chr4:129516103-129542713  | 7.0648   | 6.9025   | -0.0335 | 0.794651 |
| <i>Cep97</i>         | chr16:55899887-55934855   | 23.6758  | 23.5556  | -0.0073 | 0.851020 |
| <i>Xpo6</i>          | chr7:126101714-126200501  | 27.4010  | 27.1568  | -0.0129 | 0.865187 |
| <i>Zfp68</i>         | chr5:138604615-138619761  | 28.6635  | 28.3452  | -0.0161 | 0.789764 |
| <i>Zc3h18</i>        | chr8:122376608-122417360  | 13.5486  | 13.4504  | -0.0105 | 0.856038 |
| <i>Mpst</i>          | chr15:78406711-78414002   | 12.6165  | 12.3446  | -0.0314 | 0.710636 |
| <i>Phf20l1</i>       | chr15:66577571-66645255   | 87.9706  | 90.9979  | 0.0488  | 0.427145 |
| <i>Fam134a</i>       | chr1:75142785-75147909    | 36.2968  | 35.9583  | -0.0135 | 0.836928 |
| <i>Smek1</i>         | chr12:101039408-101083702 | 59.3087  | 58.8702  | -0.0107 | 0.837392 |
| <i>Rragc</i>         | chr4:123917445-123936997  | 16.9663  | 16.6966  | -0.0231 | 0.783081 |
| <i>Gm15559</i>       | chr5:110770948-110779260  | 2.6689   | 2.5441   | -0.0691 | 0.683943 |
| <i>D830025C05Rik</i> | chr8:25597011-25597989    | 4.8325   | 5.2044   | 0.1069  | 0.373841 |
| <i>Zfp961</i>        | chr8:71951037-71993408    | 8.2758   | 8.6416   | 0.0624  | 0.395254 |
| <i>Ndufb7</i>        | chr8:83566670-83571626    | 10.3768  | 10.1450  | -0.0326 | 0.779837 |
| <i>Pts</i>           | chr9:50521617-50528641    | 56.9916  | 59.2473  | 0.0560  | 0.433990 |
| <i>Clec16a</i>       | chr16:10545338-10744878   | 4.2246   | 4.4099   | 0.0620  | 0.387224 |
| <i>Klhl6</i>         | chr16:19946498-19983037   | 137.2453 | 136.0866 | -0.0122 | 0.854046 |
| <i>Pla2g16</i>       | chr19:7557458-7588545     | 10.4787  | 10.2769  | -0.0281 | 0.797510 |
| <i>Pqlc1</i>         | chr18:80253291-80292725   | 1.4333   | 1.3884   | -0.0459 | 0.699698 |
| <i>Peo1</i>          | chr19:45006557-45012762   | 6.5950   | 6.4352   | -0.0354 | 0.778679 |
| <i>Smpd2</i>         | chr10:41485641-41490369   | 15.8060  | 15.6724  | -0.0122 | 0.832333 |
| <i>Rpl13</i>         | chr8:123102349-123105244  | 29.3614  | 31.0146  | 0.0790  | 0.648932 |
| <i>Pign</i>          | chr1:105518421-105659008  | 10.6731  | 11.0737  | 0.0532  | 0.401921 |
| <i>Cpsf6</i>         | chr10:117344672-117380015 | 31.0024  | 30.8321  | -0.0079 | 0.861861 |
| <i>Mettl1</i>        | chr10:127041413-127046365 | 5.8226   | 5.6392   | -0.0462 | 0.768388 |
| <i>Klf3</i>          | chr5:64803522-64830129    | 81.0081  | 85.0131  | 0.0696  | 0.644174 |
| <i>Clp2</i>          | chr5:134489385-134552434  | 2.7151   | 2.6252   | -0.0486 | 0.723738 |
| <i>Coq7</i>          | chr7:118509658-118533356  | 1.0556   | 1.0031   | -0.0736 | 0.639900 |
| <i>Tjdp2</i>         | chr9:96196274-96323646    | 4.7891   | 5.0100   | 0.0651  | 0.540122 |
| <i>P4htm</i>         | chr9:108578825-108597600  | 3.8988   | 3.7512   | -0.0557 | 0.672115 |
| <i>Comtd1</i>        | chr14:21845860-21848977   | 4.2314   | 4.4984   | 0.0883  | 0.485674 |
| <i>Gm23946</i>       | chr14:32191853-32192050   | 23.2703  | 21.9185  | -0.0863 | 0.656954 |
| <i>Kbtbd7</i>        | chr14:79426510-79431039   | 4.5288   | 4.7604   | 0.0719  | 0.522666 |
| <i>Rps10</i>         | chr17:27630421-27636629   | 53.5118  | 52.2525  | -0.0344 | 0.805916 |
| <i>BC027231</i>      | chr16:44724300-44737284   | 10.2977  | 10.6625  | 0.0502  | 0.090789 |
| <i>Cfl1</i>          | chr19:5490484-5494029     | 486.5943 | 473.6621 | -0.0389 | 0.810208 |
| <i>Tmem216</i>       | chr19:10533864-10556238   | 6.8741   | 6.6895   | -0.0393 | 0.745382 |
| <i>Lipo1</i>         | chr19:33517739-33761951   | 1.9596   | 1.8621   | -0.0736 | 0.738053 |
| <i>Wdr12</i>         | chr1:60076867-60098645    | 11.7164  | 11.5266  | -0.0236 | 0.803590 |
| <i>Seh1l</i>         | chr18:67774875-67795461   | 22.7958  | 23.7321  | 0.0581  | 0.504534 |
| <i>Pithd1</i>        | chr4:135975459-135987264  | 14.6668  | 14.4308  | -0.0234 | 0.722918 |
| <i>Cd247</i>         | chr1:165788680-165877276  | 125.3345 | 124.2165 | -0.0129 | 0.844780 |
| <i>Kcna3</i>         | chr3:107036161-107038129  | 26.0571  | 25.6043  | -0.0253 | 0.828130 |
| <i>Rabl6</i>         | chr2:25583017-25608521    | 13.0861  | 13.5395  | 0.0491  | 0.249820 |
| <i>Fam219a</i>       | chr4:41517690-41569538    | 1.2572   | 1.3722   | 0.1263  | 0.595217 |
| <i>Fgd3</i>          | chr13:49261553-49320311   | 30.7279  | 30.5401  | -0.0088 | 0.876657 |
| <i>Rps9</i>          | chr7:3703992-3706901      | 272.9361 | 265.5552 | -0.0396 | 0.809243 |
| <i>Zscan22</i>       | chr7:12897814-12909083    | 2.8929   | 3.0869   | 0.0937  | 0.513554 |
| <i>Emc8</i>          | chr8:120653913-120668573  | 4.5346   | 4.7756   | 0.0747  | 0.551779 |
| <i>Mrpl50</i>        | chr4:49512595-49521093    | 11.5853  | 12.2274  | 0.0778  | 0.587878 |
| <i>Loxl3</i>         | chr6:83034172-83052562    | 2.5237   | 2.4531   | -0.0410 | 0.636262 |
| <i>Hira</i>          | chr16:18877036-18970309   | 8.6594   | 8.5060   | -0.0258 | 0.818137 |
| <i>Ankrd32</i>       | chr13:77043087-77135473   | 6.1221   | 6.3780   | 0.0591  | 0.477984 |
| <i>Sil1</i>          | chr18:35266399-35498925   | 14.7830  | 14.4184  | -0.0360 | 0.785913 |
| <i>Harbi1</i>        | chr2:91710851-91721545    | 3.1792   | 3.0890   | -0.0415 | 0.744162 |
| <i>Ndufv3</i>        | chr17:31520114-31531321   | 38.8675  | 37.7198  | -0.0432 | 0.796783 |

|                      |                           |          |          |         |          |
|----------------------|---------------------------|----------|----------|---------|----------|
| <i>Rnf122</i>        | chr8:31111819-31131482    | 2.8276   | 2.9590   | 0.0655  | 0.338252 |
| <i>Bscl2</i>         | chr19:8837466-8848683     | 8.4865   | 8.7982   | 0.0520  | 0.301001 |
| <i>Ptch1</i>         | chr13:63511532-63565520   | 5.8536   | 6.1755   | 0.0772  | 0.580584 |
| <i>Sdhd</i>          | chr9:50596337-50603849    | 38.1993  | 37.4657  | -0.0280 | 0.776641 |
| <i>Polr3a</i>        | chr14:24448693-24487046   | 18.5954  | 18.4074  | -0.0147 | 0.853855 |
| <i>Fam122a</i>       | chr19:24476501-24477356   | 5.7059   | 6.1889   | 0.1172  | 0.504684 |
| <i>Lrrc47</i>        | chr4:154011730-154021513  | 12.6824  | 12.3582  | -0.0374 | 0.825136 |
| <i>Gm11346</i>       | chr13:24597612-24604925   | 62.4795  | 64.7064  | 0.0505  | 0.444804 |
| <i>9430091E24Rik</i> | chr8:111128885-111145480  | 10.1405  | 9.8434   | -0.0429 | 0.689040 |
| <i>Acsf5</i>         | chr19:55253368-55296627   | 59.6242  | 59.0252  | -0.0146 | 0.828885 |
| <i>Zfp617</i>        | chr8:71908634-71934629    | 6.3011   | 6.6492   | 0.0776  | 0.606590 |
| <i>Foxp3</i>         | chrX:7579675-7595243      | 6.3260   | 6.2070   | -0.0274 | 0.774640 |
| <i>Gm23119</i>       | chr18:74778560-74778700   | 57.1381  | 61.0276  | 0.0950  | 0.541937 |
| <i>Tnfrsf14</i>      | chr4:154922209-154928563  | 35.3161  | 37.1359  | 0.0725  | 0.592449 |
| <i>Mpc1</i>          | chr17:8282903-8297661     | 4.2238   | 4.0865   | -0.0477 | 0.468680 |
| <i>Cntrl</i>         | chr2:35109491-35178822    | 54.9202  | 54.4719  | -0.0118 | 0.868146 |
| <i>Smc3</i>          | chr19:53600397-53645833   | 38.0752  | 39.5152  | 0.0536  | 0.498079 |
| <i>Tmem209</i>       | chr6:30479052-30509783    | 11.2940  | 11.6941  | 0.0502  | 0.401392 |
| <i>Lrrc61</i>        | chr6:48554795-48570722    | 4.3080   | 4.1959   | -0.0380 | 0.717279 |
| <i>Pelp1</i>         | chr11:70392882-70410031   | 5.8883   | 6.2325   | 0.0819  | 0.588479 |
| <i>Rffl</i>          | chr11:82802448-82871210   | 10.3576  | 10.2724  | -0.0119 | 0.788466 |
| <i>Tmem167b</i>      | chr3:108556424-108562466  | 25.3843  | 24.8565  | -0.0303 | 0.791565 |
| <i>Git1</i>          | chr11:77493561-77507786   | 6.9625   | 7.3577   | 0.0796  | 0.642000 |
| <i>Exo5</i>          | chr4:120921195-120925017  | 10.1339  | 10.6764  | 0.0752  | 0.570445 |
| <i>Proz</i>          | chr8:13060907-13075006    | 1.9295   | 2.0948   | 0.1186  | 0.538590 |
| <i>Gm26767</i>       | chr9:97068182-97073429    | 3.1780   | 3.3506   | 0.0763  | 0.361353 |
| <i>Cisd2</i>         | chr3:135406411-135423925  | 17.5885  | 17.3447  | -0.0201 | 0.806597 |
| <i>Rab27a</i>        | chr9:73044864-73097592    | 38.5549  | 38.0905  | -0.0175 | 0.816768 |
| <i>Gimap5</i>        | chr6:48746196-48754210    | 32.4725  | 33.7366  | 0.0551  | 0.468049 |
| <i>Bid</i>           | chr6:120891929-120916853  | 6.0401   | 5.9180   | -0.0295 | 0.734700 |
| <i>Zfp790</i>        | chr7:29816071-29832042    | 10.8906  | 10.7471  | -0.0191 | 0.780623 |
| <i>1700084C06Rik</i> | chr9:21091754-21128393    | 12.4456  | 13.2706  | 0.0926  | 0.538928 |
| <i>Traj23</i>        | chr14:54196080-54196140   | 160.0790 | 171.8319 | 0.1022  | 0.623173 |
| <i>Nelfcd</i>        | chr2:174415803-174427502  | 17.1631  | 16.9967  | -0.0141 | 0.689588 |
| <i>Ttc14</i>         | chr3:33799954-33814860    | 39.7300  | 41.1296  | 0.0499  | 0.469295 |
| <i>Igkc</i>          | chr6:70726434-70726757    | 11.4165  | 14.1890  | 0.3137  | 0.686782 |
| <i>Rnpepl1</i>       | chr1:92910782-92924384    | 12.7568  | 12.5011  | -0.0292 | 0.847035 |
| <i>Ssr3</i>          | chr3:65379654-65392623    | 33.9508  | 35.1578  | 0.0504  | 0.420926 |
| <i>Pi4kb</i>         | chr3:94974730-95006843    | 30.1163  | 29.9160  | -0.0096 | 0.854680 |
| <i>Utp14b</i>        | chr1:78658037-78667588    | 4.3079   | 4.5551   | 0.0805  | 0.559178 |
| <i>Ube2v1</i>        | chr2:167607637-167632095  | 1.8211   | 1.9560   | 0.1031  | 0.464679 |
| <i>Zfp605</i>        | chr5:110110091-110129794  | 4.3965   | 4.6256   | 0.0733  | 0.520007 |
| <i>Atg7</i>          | chr6:114643096-114860614  | 7.2047   | 7.4909   | 0.0562  | 0.375982 |
| <i>Rbm6</i>          | chr9:107773558-107873237  | 17.6176  | 18.1551  | 0.0434  | 0.185178 |
| <i>1110008P14Rik</i> | chr2:32377096-32381938    | 10.3446  | 10.1796  | -0.0232 | 0.779548 |
| <i>Grin3a</i>        | chr4:49661610-49845744    | 0.4100   | 0.4452   | 0.1190  | 0.624791 |
| <i>Hsp90b1</i>       | chr10:86690208-86705509   | 80.5018  | 83.4221  | 0.0514  | 0.439422 |
| <i>Col23a1</i>       | chr11:51289919-51583918   | 1.8396   | 1.9527   | 0.0861  | 0.530603 |
| <i>Coil</i>          | chr11:88970251-88991613   | 5.8746   | 5.7505   | -0.0308 | 0.688477 |
| <i>Taco1</i>         | chr11:106066060-106073612 | 7.7719   | 7.5184   | -0.0478 | 0.739790 |
| <i>Sri</i>           | chr5:8046077-8069379      | 52.6051  | 51.5182  | -0.0301 | 0.818061 |
| <i>Lsm8</i>          | chr6:18848578-18855751    | 12.9880  | 12.6807  | -0.0346 | 0.787907 |
| <i>S1pr2</i>         | chr9:20965951-20976793    | 3.4341   | 3.6900   | 0.1037  | 0.671179 |
| <i>Pnkd</i>          | chr1:74284929-74353694    | 1.2560   | 1.3435   | 0.0972  | 0.437524 |
| <i>Gm9823</i>        | chr2:29738334-29738665    | 38.7687  | 37.8046  | -0.0363 | 0.723276 |
| <i>Snx30</i>         | chr4:59805839-59904737    | 5.0468   | 5.2699   | 0.0624  | 0.471574 |
| <i>Ube2n</i>         | chr10:95515161-95545658   | 3.9672   | 3.8670   | -0.0369 | 0.652704 |
| <i>Med13</i>         | chr11:86267032-86357602   | 26.2639  | 27.1964  | 0.0503  | 0.473359 |
| <i>Cfap97</i>        | chr8:46151770-46195590    | 11.6584  | 12.0818  | 0.0515  | 0.390781 |
| <i>Fbxw11</i>        | chr11:32642723-32746816   | 16.3318  | 16.9282  | 0.0517  | 0.381327 |
| <i>Vamp2</i>         | chr11:69088489-69092384   | 6.0706   | 6.4763   | 0.0933  | 0.654369 |
| <i>Hgs</i>           | chr11:120467634-120483984 | 17.4494  | 17.2019  | -0.0206 | 0.832673 |
| <i>Zfp712</i>        | chr13:67038593-67061170   | 6.5472   | 6.4263   | -0.0269 | 0.719004 |
| <i>Ptcd2</i>         | chr13:99319648-99344678   | 22.8701  | 22.4337  | -0.0278 | 0.781549 |
| <i>Atp5j2</i>        | chr5:145183697-145192062  | 23.2792  | 22.6591  | -0.0390 | 0.775234 |
| <i>Nt5c3</i>         | chr6:56882399-56923932    | 12.5149  | 13.0292  | 0.0581  | 0.533111 |
| <i>Chchd4</i>        | chr6:91464275-91473423    | 6.9772   | 7.3780   | 0.0806  | 0.445096 |
| <i>Hnrnp1</i>        | chr7:28808540-28822266    | 69.5583  | 69.2840  | -0.0057 | 0.905366 |
| <i>Pde3b</i>         | chr7:114415280-114539251  | 39.7937  | 41.7475  | 0.0691  | 0.652621 |
| <i>Pdzd4</i>         | chrX:73793358-73824969    | 1.3716   | 1.3129   | -0.0631 | 0.726016 |
| <i>Supt16</i>        | chr14:52160418-52197239   | 47.8823  | 49.4015  | 0.0451  | 0.290086 |

|                      |                           |          |          |         |          |
|----------------------|---------------------------|----------|----------|---------|----------|
| <i>Il1rap</i>        | chr16:26581703-26730117   | 2.2503   | 2.3474   | 0.0609  | 0.381515 |
| <i>Dtymk</i>         | chr1:93792575-93801934    | 18.8706  | 18.6290  | -0.0186 | 0.787163 |
| <i>Ube2d2a</i>       | chr18:35771558-35807172   | 19.9808  | 19.7140  | -0.0194 | 0.806464 |
| <i>Hs2st1</i>        | chr3:144431102-144570181  | 5.8147   | 6.0769   | 0.0636  | 0.499320 |
| <i>Z610301B20Rik</i> | chr4:10874497-10899425    | 3.3945   | 3.2454   | -0.0648 | 0.721038 |
| <i>Gm17435</i>       | chr8:72492933-72505499    | 2.8749   | 3.0843   | 0.1014  | 0.588884 |
| <i>Slc25a10</i>      | chr11:120491839-120499187 | 2.5038   | 2.4298   | -0.0433 | 0.733049 |
| <i>Tubb2b</i>        | chr13:34127007-34130354   | 2.5166   | 2.7560   | 0.1311  | 0.689720 |
| <i>Rab10</i>         | chr12:3247429-3309969     | 59.8339  | 58.8374  | -0.0242 | 0.820967 |
| <i>Rufy3</i>         | chr5:88583573-88642671    | 1.4412   | 1.3825   | -0.0600 | 0.694784 |
| <i>Zfp319</i>        | chr8:95326136-95331950    | 8.2980   | 8.1656   | -0.0232 | 0.830578 |
| <i>Lamtor2</i>       | chr3:88549818-88553074    | 15.1516  | 14.5945  | -0.0540 | 0.792101 |
| <i>Gm12490</i>       | chr3:101260916-101261476  | 8.9601   | 8.5964   | -0.0598 | 0.726221 |
| <i>Adck1</i>         | chr12:88360553-88461719   | 9.6822   | 9.5187   | -0.0246 | 0.650625 |
| <i>Cdk16</i>         | chrX:20687953-20699880    | 11.6759  | 12.1552  | 0.0580  | 0.455048 |
| <i>Prdx2</i>         | chr8:84969586-84974834    | 18.1872  | 17.8486  | -0.0271 | 0.790596 |
| <i>D330023K18Rik</i> | chr2:31146456-31152291    | 3.4330   | 3.2498   | -0.0791 | 0.643312 |
| <i>Fam96a</i>        | chr9:66126610-66138955    | 30.5944  | 29.5533  | -0.0499 | 0.795246 |
| <i>Manf</i>          | chr9:106838311-106891979  | 20.2096  | 19.9546  | -0.0183 | 0.800643 |
| <i>Gla</i>           | chrX:134588148-134601125  | 3.3810   | 3.2761   | -0.0455 | 0.737135 |
| <i>Dync1i2</i>       | chr2:71211705-71263303    | 14.5208  | 15.0801  | 0.0545  | 0.482164 |
| <i>Prox2</i>         | chr12:85085813-85106431   | 1.4217   | 1.5418   | 0.1169  | 0.598508 |
| <i>Zfyve20</i>       | chr6:92186711-92214925    | 9.4682   | 9.3684   | -0.0153 | 0.791983 |
| <i>Zfp963</i>        | chr8:69741638-69749970    | 6.5931   | 6.4133   | -0.0399 | 0.726950 |
| <i>Tlr2</i>          | chr3:83836272-83841767    | 1.9290   | 1.8494   | -0.0609 | 0.656091 |
| <i>Zfp182</i>        | chrX:21028938-21062316    | 10.4702  | 10.2912  | -0.0249 | 0.832977 |
| <i>Prps2</i>         | chrX:167346321-167382749  | 35.4404  | 34.8236  | -0.0253 | 0.818913 |
| <i>Pigb</i>          | chr9:73015695-73039699    | 5.1639   | 5.4765   | 0.0848  | 0.508405 |
| <i>Rtca</i>          | chr3:116488962-116508208  | 11.8091  | 12.3131  | 0.0603  | 0.282995 |
| <i>Zmym1</i>         | chr4:127047093-127061152  | 12.4906  | 12.3174  | -0.0201 | 0.793504 |
| <i>Ctdnep1</i>       | chr11:69981155-69990601   | 10.9837  | 11.5639  | 0.0743  | 0.566263 |
| <i>Arsf</i>          | chr11:109473373-109573330 | 1.2620   | 1.3798   | 0.1287  | 0.652679 |
| <i>Zbtb42</i>        | chr12:112678827-112682747 | 2.5192   | 2.6860   | 0.0925  | 0.579379 |
| <i>Ccz1</i>          | chr5:143987915-144014853  | 28.6773  | 29.8371  | 0.0572  | 0.514594 |
| <i>Zkscan14</i>      | chr5:145194945-145201868  | 13.2257  | 13.8186  | 0.0633  | 0.441927 |
| <i>Art2b</i>         | chr7:101578859-101581161  | 41.0057  | 40.0062  | -0.0356 | 0.793485 |
| <i>Pfkfb4</i>        | chr9:108991901-109032223  | 3.8074   | 3.7263   | -0.0311 | 0.722331 |
| <i>Rictor</i>        | chr15:6708380-6800398     | 44.3188  | 45.7392  | 0.0455  | 0.368950 |
| <i>Eaf1</i>          | chr14:31495078-31509858   | 14.7125  | 14.5244  | -0.0186 | 0.833373 |
| <i>Zfp955a</i>       | chr17:33241518-33255040   | 9.5563   | 9.2881   | -0.0411 | 0.738300 |
| <i>Mfsd6</i>         | chr1:52656285-52727462    | 11.8136  | 12.3212  | 0.0607  | 0.587199 |
| <i>Slc19a2</i>       | chr1:164249045-164265385  | 2.2957   | 2.2204   | -0.0481 | 0.746017 |
| <i>Efcab2</i>        | chr1:178405880-178483247  | 2.1100   | 2.2682   | 0.1043  | 0.579153 |
| <i>Slc24a5</i>       | chr2:125068123-125088677  | 6.4866   | 6.8054   | 0.0692  | 0.389112 |
| <i>Comm7</i>         | chr2:153616932-153632781  | 9.6659   | 9.5587   | -0.0161 | 0.774789 |
| <i>Srsf6</i>         | chr2:162931527-162937121  | 104.3320 | 103.6181 | -0.0099 | 0.865341 |
| <i>Hltf</i>          | chr3:20057810-20118490    | 25.0907  | 24.7588  | -0.0192 | 0.831499 |
| <i>Ccdc17</i>        | chr4:116596653-116600266  | 3.1004   | 3.3027   | 0.0912  | 0.607030 |
| <i>Fbxo6</i>         | chr4:148145715-148152140  | 8.9900   | 8.7267   | -0.0429 | 0.778734 |
| <i>Lsp1</i>          | chr7:142460808-142494867  | 99.5156  | 97.8177  | -0.0248 | 0.830162 |
| <i>Slc3a2</i>        | chr19:8706881-8723369     | 25.9346  | 25.7243  | -0.0117 | 0.850268 |
| <i>Sephs1</i>        | chr2:4881563-4910557      | 9.5292   | 9.4131   | -0.0177 | 0.775286 |
| <i>Dpy30</i>         | chr17:74299473-74323944   | 20.5150  | 19.8545  | -0.0472 | 0.769030 |
| <i>Mipol1</i>        | chr12:57230426-57497199   | 1.4637   | 1.4190   | -0.0447 | 0.733448 |
| <i>Inpp5a</i>        | chr7:139389108-139579652  | 4.1126   | 3.9810   | -0.0469 | 0.795686 |
| <i>Tmem192</i>       | chr8:64947184-64969034    | 15.9722  | 16.9128  | 0.0826  | 0.612369 |
| <i>Mrpl21</i>        | chr19:3282900-3292837     | 13.1273  | 12.7474  | -0.0424 | 0.799154 |
| <i>Xrcc4</i>         | chr13:89774026-90089608   | 7.3024   | 7.6130   | 0.0601  | 0.497614 |
| <i>4632415L05Rik</i> | chr3:19894885-19895962    | 8.9502   | 9.4761   | 0.0824  | 0.511190 |
| <i>Plekhm3</i>       | chr1:64785982-64956824    | 2.4123   | 2.5325   | 0.0702  | 0.573128 |
| <i>B3glct</i>        | chr5:149678229-149762599  | 2.0830   | 2.0198   | -0.0444 | 0.712151 |
| <i>Slc25a3</i>       | chr10:91116573-91124059   | 48.2688  | 49.8162  | 0.0455  | 0.373620 |
| <i>Gm26563</i>       | chr11:80017353-80029868   | 6.3573   | 6.6427   | 0.0634  | 0.387048 |
| <i>Stat3</i>         | chr11:100885097-100939540 | 38.7253  | 38.4488  | -0.0103 | 0.885833 |
| <i>Skp2</i>          | chr15:9111984-9140451     | 1.3419   | 1.3047   | -0.0406 | 0.707061 |
| <i>Ppp1r2</i>        | chr16:31251536-31275277   | 3.7486   | 3.9561   | 0.0777  | 0.561454 |
| <i>Cep192</i>        | chr18:67800106-67885168   | 23.0117  | 23.8086  | 0.0491  | 0.455821 |
| <i>Cd72</i>          | chr4:43446461-43454628    | 11.0295  | 10.8906  | -0.0183 | 0.825405 |
| <i>Stx17</i>         | chr4:48124914-48186507    | 8.1640   | 8.4731   | 0.0536  | 0.352917 |
| <i>2810006K23Rik</i> | chr5:124328088-124341844  | 2.1802   | 2.0968   | -0.0563 | 0.660437 |
| <i>Il4i1</i>         | chr7:44816369-44840809    | 1.8829   | 2.0133   | 0.0966  | 0.563499 |

|                      |                           |         |         |         |          |
|----------------------|---------------------------|---------|---------|---------|----------|
| <i>Rab4b</i>         | chr7:27168423-27178896    | 20.7925 | 20.5009 | -0.0204 | 0.826995 |
| <i>Pcdcd6</i>        | chr13:74303120-74317326   | 42.2385 | 41.5456 | -0.0239 | 0.806946 |
| <i>Immt</i>          | chr6:71831330-71875257    | 34.3111 | 34.1059 | -0.0087 | 0.867345 |
| <i>Nup107</i>        | chr10:117750623-117792705 | 22.0304 | 21.8515 | -0.0118 | 0.771446 |
| <i>Rps20</i>         | chr4:3831333-3835665      | 68.0330 | 71.5745 | 0.0732  | 0.661179 |
| <i>Man2b1</i>        | chr8:85083268-85098739    | 39.8482 | 39.5226 | -0.0118 | 0.875133 |
| <i>1700027A07Rik</i> | chr15:78911965-78913660   | 10.4101 | 9.9244  | -0.0689 | 0.700290 |
| <i>Tom1l2</i>        | chr11:60226713-60352905   | 4.0568  | 4.2619  | 0.0711  | 0.622504 |
| <i>Ints3</i>         | chr3:90391379-90433636    | 14.6679 | 14.5739 | -0.0093 | 0.773900 |
| <i>Dnajc8</i>        | chr4:132535549-132553742  | 54.2467 | 53.0655 | -0.0318 | 0.819279 |
| <i>Mmp24</i>         | chr2:155775341-155818366  | 3.3183  | 3.2428  | -0.0332 | 0.661199 |
| <i>4930539J05Rik</i> | chr3:135436208-135438665  | 3.4160  | 3.6843  | 0.1091  | 0.644551 |
| <i>Gm16093</i>       | chr3:19227779-19240987    | 16.1807 | 15.4103 | -0.0704 | 0.715860 |
| <i>Polb</i>          | chr8:22628118-22653437    | 21.9191 | 21.4171 | -0.0334 | 0.771894 |
| <i>Atp6v1d</i>       | chr12:78842988-78861638   | 93.2228 | 97.7361 | 0.0682  | 0.654775 |
| <i>Gm22270</i>       | chr5:107905176-107905308  | 36.5140 | 34.5876 | -0.0782 | 0.713857 |
| <i>Daglb</i>         | chr5:143464492-143504442  | 2.1936  | 2.3201  | 0.0809  | 0.606522 |
| <i>Tmem135</i>       | chr7:89139722-89404222    | 7.1757  | 7.4371  | 0.0516  | 0.234375 |
| <i>Hyls1</i>         | chr9:35560819-35570103    | 19.6223 | 19.3183 | -0.0225 | 0.836673 |
| <i>Prps1</i>         | chrX:140456612-140476140  | 17.3068 | 18.1235 | 0.0665  | 0.574418 |
| <i>Ndufaf7</i>       | chr17:78937134-78948052   | 6.2923  | 6.6242  | 0.0742  | 0.596732 |
| <i>Cntf</i>          | chr19:12763659-12765632   | 3.9207  | 3.6994  | -0.0838 | 0.763816 |
| <i>Zc3h15</i>        | chr2:83644434-83664622    | 31.0025 | 32.2934 | 0.0589  | 0.573087 |
| <i>Fbrs1l</i>        | chr5:110361753-110448503  | 6.2463  | 6.0846  | -0.0378 | 0.842240 |
| <i>Parp6</i>         | chr9:59617283-59650290    | 18.8167 | 18.6620 | -0.0119 | 0.827446 |
| <i>Msl2</i>          | chr9:101074726-101104784  | 46.5597 | 46.3752 | -0.0057 | 0.910210 |
| <i>Chchd7</i>        | chr4:3938887-3951046      | 4.4912  | 4.6955  | 0.0642  | 0.408659 |
| <i>Rnf20</i>         | chr4:49632005-49656887    | 29.9575 | 29.7874 | -0.0082 | 0.862935 |
| <i>Gm20671</i>       | chr5:32737229-32827109    | 26.8837 | 26.6074 | -0.0149 | 0.828979 |
| <i>Chtf18</i>        | chr17:25718925-25727419   | 1.1477  | 1.0960  | -0.0666 | 0.714295 |
| <i>Zfp120</i>        | chr2:150114405-150136708  | 13.8775 | 14.4595 | 0.0593  | 0.584594 |
| <i>Rab3d</i>         | chr9:21907490-21918192    | 4.1967  | 4.1021  | -0.0329 | 0.778871 |
| <i>Thoc2</i>         | chrX:41794990-41920674    | 24.7450 | 25.4914 | 0.0429  | 0.218463 |
| <i>Mapkapk2</i>      | chr1:131053703-131097543  | 37.8482 | 39.4118 | 0.0584  | 0.600999 |
| <i>Nr6a1</i>         | chr2:38723369-38927688    | 0.6753  | 0.7305  | 0.1134  | 0.668289 |
| <i>Ap4s1</i>         | chr12:51690965-51738939   | 19.6312 | 20.5814 | 0.0682  | 0.536849 |
| <i>Pex11b</i>        | chr3:96635375-96653101    | 4.7780  | 4.7084  | -0.0212 | 0.775098 |
| <i>Adat3</i>         | chr10:80602879-80615783   | 11.0223 | 10.8816 | -0.0185 | 0.855948 |
| <i>Mettl25</i>       | chr10:105763188-105841380 | 5.2845  | 5.5511  | 0.0710  | 0.502412 |
| <i>Mien1</i>         | chr11:98437707-98438991   | 35.6847 | 37.6520 | 0.0774  | 0.648629 |
| <i>Angel1</i>        | chr12:86700501-86726460   | 2.2706  | 2.4413  | 0.1046  | 0.675319 |
| <i>Gpld1</i>         | chr13:24943151-24990753   | 4.7063  | 4.5878  | -0.0368 | 0.796658 |
| <i>Sv2c</i>          | chr13:95959442-96132577   | 1.0333  | 1.1175  | 0.1131  | 0.645751 |
| <i>Dhx37</i>         | chr5:125414405-125434048  | 9.3242  | 9.1952  | -0.0201 | 0.849378 |
| <i>Gmfg</i>          | chr7:28437446-28448233    | 32.5872 | 34.1553 | 0.0678  | 0.636343 |
| <i>Elmo3</i>         | chr8:105305600-105310623  | 6.9163  | 7.2399  | 0.0660  | 0.495572 |
| <i>Atp6v0d1</i>      | chr8:105524464-105566047  | 28.6831 | 28.3390 | -0.0174 | 0.800620 |
| <i>Foxred1</i>       | chr9:35204205-35211055    | 13.0372 | 12.9073 | -0.0144 | 0.813164 |
| <i>Mettl17</i>       | chr14:51884841-51893039   | 18.1363 | 17.9478 | -0.0151 | 0.839822 |
| <i>Filip1l</i>       | chr16:57353092-57573126   | 14.5630 | 15.2876 | 0.0701  | 0.643840 |
| <i>Lrp5</i>          | chr19:3584827-3686564     | 0.8510  | 0.9102  | 0.0969  | 0.563965 |
| <i>Nab1</i>          | chr1:52457293-52500679    | 31.6458 | 32.8948 | 0.0558  | 0.571476 |
| <i>Hdac4</i>         | chr1:91932756-92148393    | 14.9723 | 14.7284 | -0.0237 | 0.859212 |
| <i>Glul</i>          | chr1:153899943-153909723  | 27.1257 | 26.7039 | -0.0226 | 0.829083 |
| <i>Adam15</i>        | chr3:89339639-89349996    | 2.0024  | 1.9538  | -0.0355 | 0.759777 |
| <i>Wis</i>           | chr3:159839736-159935833  | 7.0418  | 7.4497  | 0.0812  | 0.695780 |
| <i>Gm12940</i>       | chr4:127033730-127049398  | 34.4530 | 35.6446 | 0.0491  | 0.399545 |
| <i>Tmem222</i>       | chr4:133266044-133277792  | 18.8774 | 19.5858 | 0.0531  | 0.288143 |
| <i>Rab22a</i>        | chr2:173659759-173707343  | 10.6118 | 10.5298 | -0.0112 | 0.839817 |
| <i>Nit2</i>          | chr16:57156670-57167332   | 18.8138 | 18.3830 | -0.0334 | 0.767787 |
| <i>Scp2</i>          | chr4:108043838-108144998  | 18.3456 | 17.8231 | -0.0417 | 0.821040 |
| <i>Vps36</i>         | chr8:22192808-22220843    | 15.2409 | 15.1062 | -0.0128 | 0.780323 |
| <i>G6pdx</i>         | chrX:74409482-74429194    | 13.0008 | 13.4996 | 0.0543  | 0.436232 |
| <i>Tmem62</i>        | chr2:120977016-121007852  | 9.4488  | 9.2577  | -0.0295 | 0.805734 |
| <i>E130215H24Rik</i> | chr2:150667493-150668935  | 10.1800 | 9.8750  | -0.0439 | 0.730327 |
| <i>Sfxn2</i>         | chr19:46573364-46596898   | 7.1336  | 7.4713  | 0.0667  | 0.574897 |
| <i>Mast3</i>         | chr8:70778116-70792433    | 17.8301 | 18.7342 | 0.0714  | 0.651416 |
| <i>Blmh</i>          | chr11:76924808-76987379   | 9.6438  | 9.4792  | -0.0248 | 0.826825 |
| <i>Ddx52</i>         | chr11:83942061-83963088   | 32.3353 | 33.4575 | 0.0492  | 0.464855 |
| <i>Gm20529</i>       | chr9:108051674-108058592  | 51.4205 | 50.2513 | -0.0332 | 0.156408 |
| <i>Ehbp1l1</i>       | chr19:5707375-5726317     | 13.0264 | 12.8283 | -0.0221 | 0.857548 |

|                      |                           |          |          |         |          |
|----------------------|---------------------------|----------|----------|---------|----------|
| <i>Marveld1</i>      | chr19:42147399-42151695   | 9.6135   | 9.4671   | -0.0221 | 0.821231 |
| <i>Mrp30</i>         | chr1:37890476-37898535    | 31.8537  | 33.4029  | 0.0685  | 0.650965 |
| <i>2700062C07Rik</i> | chr18:24470860-24477765   | 9.7262   | 10.3988  | 0.0965  | 0.692425 |
| <i>Cds2</i>          | chr2:132263147-132312050  | 38.7037  | 38.4669  | -0.0089 | 0.903276 |
| <i>Galnt4</i>        | chr10:99108134-99113245   | 11.3233  | 11.1508  | -0.0222 | 0.816741 |
| <i>Spred2</i>        | chr11:19924374-20024026   | 2.9028   | 3.1003   | 0.0949  | 0.636876 |
| <i>Prr33</i>         | chr7:142491073-142506771  | 8.0585   | 7.8491   | -0.0380 | 0.830522 |
| <i>Fut11</i>         | chr14:20694967-20700197   | 10.0991  | 9.9712   | -0.0184 | 0.766147 |
| <i>Rela</i>          | chr19:5637482-5648130     | 32.1822  | 33.5066  | 0.0582  | 0.566212 |
| <i>Klh5</i>          | chr5:65107567-65168188    | 8.4939   | 8.8242   | 0.0550  | 0.407243 |
| <i>Zfyve21</i>       | chr12:111814169-111828388 | 4.4324   | 4.2732   | -0.0528 | 0.674712 |
| <i>Tmem191c</i>      | chr16:17276299-17283229   | 10.2455  | 10.1023  | -0.0203 | 0.824311 |
| <i>L1cam</i>         | chrX:73853777-73896105    | 8.5336   | 8.9391   | 0.0670  | 0.622479 |
| <i>Slc19a1</i>       | chr10:77032240-77061002   | 3.4676   | 3.4028   | -0.0272 | 0.788460 |
| <i>Adam19</i>        | chr11:46055991-46147343   | 8.9081   | 9.7797   | 0.1347  | 0.666619 |
| <i>Mrp19</i>         | chr6:81957850-81965958    | 7.6596   | 7.5837   | -0.0144 | 0.777577 |
| <i>Gm4944</i>        | chr17:22197264-22225614   | 8.4041   | 8.7373   | 0.0561  | 0.525968 |
| <i>Gm10814</i>       | chr19:6012619-6018426     | 9.5698   | 9.4121   | -0.0240 | 0.755947 |
| <i>Nin</i>           | chr12:70011434-70111925   | 35.0389  | 34.8154  | -0.0092 | 0.892470 |
| <i>Gga2</i>          | chr7:121986721-122021222  | 0.9270   | 0.8988   | -0.0446 | 0.732865 |
| <i>Rcn2</i>          | chr9:56041844-56061882    | 10.0210  | 9.9088   | -0.0162 | 0.791551 |
| <i>Sipa1l1</i>       | chr12:82170015-82451782   | 21.7188  | 21.4943  | -0.0150 | 0.883884 |
| <i>Setd8</i>         | chr5:124439929-124462308  | 9.0005   | 8.8303   | -0.0275 | 0.828141 |
| <i>Rnf24</i>         | chr2:131298063-131352892  | 4.1146   | 4.2897   | 0.0601  | 0.377108 |
| <i>Tma7</i>          | chr9:109077987-109082381  | 20.1969  | 21.5793  | 0.0955  | 0.702600 |
| <i>Entpd7</i>        | chr19:43689671-43733697   | 0.8463   | 0.8193   | -0.0469 | 0.782942 |
| <i>Inpp5e</i>        | chr2:26396248-26409203    | 19.1177  | 19.0115  | -0.0080 | 0.862803 |
| <i>Pex2</i>          | chr3:5560187-5576239      | 15.0029  | 15.6004  | 0.0563  | 0.502862 |
| <i>Ulk4</i>          | chr9:120960267-121277197  | 4.0473   | 3.9751   | -0.0260 | 0.804936 |
| <i>2810004N23Rik</i> | chr8:124839354-124863029  | 24.2958  | 23.8999  | -0.0237 | 0.778314 |
| <i>Rabgap1</i>       | chr2:37443278-37566454    | 16.3705  | 16.3004  | -0.0062 | 0.877843 |
| <i>Npm1</i>          | chr11:33152286-33163206   | 91.9521  | 96.3616  | 0.0676  | 0.669374 |
| <i>N4bp3</i>         | chr11:51643062-51650842   | 2.6012   | 2.5171   | -0.0474 | 0.762284 |
| <i>Npepps</i>        | chr11:97205841-97280638   | 6.6081   | 6.8834   | 0.0589  | 0.497454 |
| <i>C530008M17Rik</i> | chr5:76657682-76873554    | 0.5950   | 0.5620   | -0.0821 | 0.801900 |
| <i>Hmces</i>         | chr6:87913934-87936629    | 8.8794   | 9.2704   | 0.0622  | 0.509800 |
| <i>Zfp109</i>        | chr7:24228047-24236632    | 3.1343   | 3.0261   | -0.0507 | 0.746515 |
| <i>Tm2d3</i>         | chr7:65691168-65701913    | 19.0344  | 18.7169  | -0.0243 | 0.796962 |
| <i>Rps17</i>         | chr7:81342731-81345254    | 7.3371   | 7.0936   | -0.0487 | 0.781623 |
| <i>Gm22579</i>       | chr9:15316675-15316808    | 35.7513  | 38.2568  | 0.0977  | 0.619629 |
| <i>Nfrkb</i>         | chr9:31386191-31421333    | 17.0036  | 16.9191  | -0.0072 | 0.908266 |
| <i>Azi2</i>          | chr9:118040498-118069794  | 25.0414  | 24.9070  | -0.0078 | 0.866185 |
| <i>Tbc1d25</i>       | chrX:8154471-8176181      | 5.1681   | 5.4560   | 0.0782  | 0.540719 |
| <i>Eny2</i>          | chr15:44428110-44437685   | 10.8603  | 11.3286  | 0.0609  | 0.566004 |
| <i>Pxk</i>           | chr14:8098212-8165111     | 19.8208  | 20.5911  | 0.0550  | 0.485361 |
| <i>Gng2</i>          | chr14:19872558-19977627   | 11.4951  | 12.1340  | 0.0780  | 0.718222 |
| <i>Dhhd1</i>         | chr14:45593173-45658143   | 8.5237   | 8.4486   | -0.0128 | 0.858769 |
| <i>Traj28</i>        | chr14:54191660-54191725   | 104.2555 | 111.3553 | 0.0950  | 0.548176 |
| <i>Dgkh</i>          | chr14:78569608-78725089   | 1.7671   | 1.9025   | 0.1065  | 0.663666 |
| <i>Paqr4</i>         | chr17:23736185-23740330   | 4.9846   | 5.3014   | 0.0889  | 0.683715 |
| <i>Jam2</i>          | chr16:84774122-84825928   | 0.7770   | 0.8407   | 0.1136  | 0.601603 |
| <i>Il1rl2</i>        | chr1:40324626-40365471    | 8.2631   | 8.1169   | -0.0258 | 0.706099 |
| <i>Gm26879</i>       | chr1:192092371-192099630  | 6.8642   | 6.6191   | -0.0525 | 0.711516 |
| <i>Rell2</i>         | chr18:37955078-37959179   | 4.1145   | 4.3256   | 0.0722  | 0.451475 |
| <i>Ttf1</i>          | chr2:29060261-29087656    | 14.9585  | 14.8389  | -0.0116 | 0.842415 |
| <i>Mvb12b</i>        | chr2:33729952-33887946    | 3.8007   | 3.9804   | 0.0667  | 0.486673 |
| <i>Gorasp2</i>       | chr2:70661575-70712636    | 19.4024  | 19.2090  | -0.0144 | 0.852379 |
| <i>Ube2e3</i>        | chr2:78868123-78921293    | 4.1006   | 4.0200   | -0.0286 | 0.749185 |
| <i>Mapre1</i>        | chr2:153741273-153773310  | 20.4227  | 21.1809  | 0.0526  | 0.535128 |
| <i>Snx27</i>         | chr3:94497543-94582716    | 11.9043  | 12.3320  | 0.0509  | 0.468226 |
| <i>Snord45c</i>      | chr3:153912124-153912204  | 52.1338  | 56.0923  | 0.1056  | 0.512937 |
| <i>Prpf38a</i>       | chr4:108563171-108579336  | 12.6306  | 13.1002  | 0.0527  | 0.506371 |
| <i>Ptgr2</i>         | chr12:84285231-84315832   | 6.3977   | 6.3053   | -0.0210 | 0.802679 |
| <i>Tchp</i>          | chr5:114707759-114722327  | 6.6991   | 6.5396   | -0.0348 | 0.826151 |
| <i>Zfp688</i>        | chr7:127418966-127422068  | 9.0090   | 9.4266   | 0.0654  | 0.579290 |
| <i>Dse</i>           | chr10:34151393-34207551   | 4.8069   | 4.6865   | -0.0366 | 0.803766 |
| <i>4930469K13Rik</i> | chr11:33973960-34098554   | 14.2114  | 15.1470  | 0.0920  | 0.629302 |
| <i>Rabep1</i>        | chr11:70844777-70943105   | 17.4974  | 18.1440  | 0.0524  | 0.547820 |
| <i>Aoc2</i>          | chr11:101325062-101329702 | 5.3733   | 5.1957   | -0.0485 | 0.839786 |
| <i>Mrp32</i>         | chr13:14610300-14613037   | 36.6103  | 35.6707  | -0.0375 | 0.796968 |
| <i>Srek1ip1</i>      | chr13:104792483-104839274 | 5.6860   | 5.9973   | 0.0769  | 0.662094 |

|                      |                           |          |          |         |          |
|----------------------|---------------------------|----------|----------|---------|----------|
| <i>Cdc7</i>          | chr5:106964321-106984432  | 11.4701  | 11.3013  | -0.0214 | 0.819254 |
| <i>Slc25a42</i>      | chr8:70184339-70212305    | 1.1858   | 1.2780   | 0.1080  | 0.686859 |
| <i>Mbtps1</i>        | chr8:119508155-119558761  | 46.4271  | 46.2541  | -0.0054 | 0.925756 |
| <i>Diap2</i>         | chrX:129749741-130465834  | 4.1010   | 4.0299   | -0.0252 | 0.840670 |
| <i>Zbtb22</i>        | chr17:33915903-33919324   | 21.6461  | 21.5112  | -0.0090 | 0.856179 |
| <i>Fam65c</i>        | chr2:167980163-168010618  | 0.9701   | 0.9311   | -0.0592 | 0.545738 |
| <i>Dnal4</i>         | chr15:79761452-79777849   | 3.0722   | 2.9403   | -0.0633 | 0.802895 |
| <i>Depdc5</i>        | chr5:32863700-32994231    | 5.5620   | 5.7696   | 0.0529  | 0.465901 |
| <i>Zfand6</i>        | chr7:84615053-84679361    | 63.1608  | 65.6581  | 0.0559  | 0.564641 |
| <i>Wdr59</i>         | chr8:111448783-111522107  | 4.3078   | 4.5182   | 0.0688  | 0.561244 |
| <i>Xpo4</i>          | chr14:57581001-57665430   | 10.9519  | 11.3492  | 0.0514  | 0.504868 |
| <i>Vti1b</i>         | chr12:79156016-79172667   | 37.1757  | 36.6001  | -0.0225 | 0.820259 |
| <i>Lrrc23</i>        | chr6:124769862-124779727  | 3.0898   | 2.9714   | -0.0564 | 0.716300 |
| <i>Trav14d-3-dv8</i> | chr14:53078579-53079045   | 16.5898  | 15.7352  | -0.0763 | 0.747589 |
| <i>Gm24407</i>       | chr5:115490253-115490394  | 306.7049 | 279.1054 | -0.1360 | 0.728770 |
| <i>Ttll4</i>         | chr1:74661744-74701832    | 11.9391  | 12.3794  | 0.0522  | 0.489157 |
| <i>Hax1</i>          | chr3:89995456-89998686    | 6.8374   | 6.6000   | -0.0510 | 0.736892 |
| <i>Gm17134</i>       | chr10:79863936-79864434   | 31.9271  | 31.3376  | -0.0269 | 0.762622 |
| <i>Haus4</i>         | chr14:54541784-54554361   | 16.6303  | 16.3329  | -0.0260 | 0.775148 |
| <i>Ints10</i>        | chr8:68793928-68829410    | 5.9743   | 5.9222   | -0.0126 | 0.780501 |
| <i>Hnrnp11</i>       | chr17:80029486-80062334   | 18.4175  | 19.1737  | 0.0580  | 0.557326 |
| <i>Ptpn1</i>         | chr2:167932056-167979385  | 33.0330  | 32.7818  | -0.0110 | 0.890936 |
| <i>Bola1</i>         | chr3:96196587-96219709    | 8.1247   | 7.8101   | -0.0570 | 0.790171 |
| <i>6430590A07Rik</i> | chr3:40885896-40894123    | 6.6963   | 6.4159   | -0.0617 | 0.807874 |
| <i>Pole</i>          | chr5:110286305-110337474  | 1.8103   | 1.7592   | -0.0413 | 0.821665 |
| <i>Gm20425</i>       | chr9:103190207-103230307  | 7.5045   | 7.3309   | -0.0338 | 0.792431 |
| <i>Rrm2b</i>         | chr15:37923951-37961318   | 8.8372   | 8.7382   | -0.0163 | 0.829689 |
| <i>Cdk17</i>         | chr10:93160875-93241342   | 63.5868  | 65.7236  | 0.0477  | 0.516219 |
| <i>Ift46</i>         | chr9:44767907-44792714    | 5.0534   | 4.9986   | -0.0157 | 0.816905 |
| <i>Phax</i>          | chr18:56562442-56587712   | 21.9555  | 22.8504  | 0.0576  | 0.603946 |
| <i>Tpgs2</i>         | chr18:25127222-25169007   | 3.5353   | 3.4525   | -0.0342 | 0.794132 |
| <i>Med16</i>         | chr10:79894707-79908923   | 5.1510   | 5.4097   | 0.0707  | 0.596886 |
| <i>Itsn2</i>         | chr12:4593007-4713950     | 75.4551  | 75.2373  | -0.0042 | 0.920260 |
| <i>Scrib</i>         | chr15:76047157-76069784   | 15.8108  | 15.6246  | -0.0171 | 0.883280 |
| <i>Cog5</i>          | chr12:31654868-31937630   | 33.5146  | 33.4042  | -0.0048 | 0.899633 |
| <i>Mif</i>           | chr10:75859352-75860250   | 24.1947  | 23.5206  | -0.0408 | 0.772856 |
| <i>Klf16</i>         | chr10:80567123-80577321   | 9.4143   | 9.1712   | -0.0377 | 0.841205 |
| <i>1110008L16Rik</i> | chr12:55302636-55382491   | 5.1125   | 4.9418   | -0.0490 | 0.803230 |
| <i>Cpsf2</i>         | chr12:101975973-102005993 | 19.1275  | 19.7767  | 0.0482  | 0.459239 |
| <i>Pcsk1</i>         | chr13:75089825-75132498   | 1.9597   | 2.1733   | 0.1492  | 0.721321 |
| <i>Fam60a</i>        | chr6:148921034-148946467  | 1.3984   | 1.4898   | 0.0913  | 0.496649 |
| <i>Slc37a4</i>       | chr9:44398175-44402963    | 12.4824  | 12.2359  | -0.0288 | 0.845106 |
| <i>Zfp451</i>        | chr1:33760471-33814595    | 5.7559   | 5.9684   | 0.0523  | 0.544802 |
| <i>Xrn2</i>          | chr2:147012995-147078000  | 104.8543 | 108.4042 | 0.0480  | 0.544793 |
| <i>Ubr7</i>          | chr12:102757974-102777701 | 24.2229  | 23.8927  | -0.0198 | 0.841434 |
| <i>Rttm</i>          | chr18:88971789-89131013   | 6.1166   | 6.3374   | 0.0512  | 0.393287 |
| <i>Nudt1</i>         | chr5:140331859-140338137  | 6.5444   | 6.3065   | -0.0534 | 0.753712 |
| <i>Zfml</i>          | chr6:83914352-83986869    | 57.7752  | 57.2398  | -0.0134 | 0.875938 |
| <i>Trbj2-2</i>       | chr6:41542956-41543007    | 181.0788 | 191.5488 | 0.0811  | 0.603879 |
| <i>Rp2h</i>          | chrX:20364480-20405653    | 7.1647   | 7.0454   | -0.0242 | 0.804942 |
| <i>Foxk1</i>         | chr5:142401496-142462014  | 18.8665  | 19.7467  | 0.0658  | 0.674274 |
| <i>Nfyb</i>          | chr10:82748700-82764144   | 13.1321  | 13.6215  | 0.0528  | 0.517867 |
| <i>Gm26572</i>       | chr8:121091627-121094858  | 2.4716   | 2.3899   | -0.0485 | 0.777167 |
| <i>1700037C18Rik</i> | chr16:3895178-3908689     | 12.1589  | 12.6189  | 0.0536  | 0.422292 |
| <i>Ppip5k2</i>       | chr1:97706047-97770411    | 12.8101  | 12.6961  | -0.0129 | 0.879061 |
| <i>Slmo2</i>         | chr2:174465066-174473081  | 19.5643  | 20.3993  | 0.0603  | 0.608258 |
| <i>Def8</i>          | chr8:123442985-123463270  | 3.8647   | 3.8027   | -0.0233 | 0.794011 |
| <i>Tomm6</i>         | chr17:47686645-47688386   | 12.9614  | 13.6528  | 0.0750  | 0.560287 |
| <i>BC024978</i>      | chr7:27195780-27205386    | 2.0119   | 2.1503   | 0.0960  | 0.494962 |
| <i>Rps15a</i>        | chr7:118104377-118116186  | 58.1352  | 62.4337  | 0.1029  | 0.641683 |
| <i>Gm21811</i>       | chr8:20136454-20150494    | 1.1926   | 1.2868   | 0.1097  | 0.599367 |
| <i>Plekhh2</i>       | chr4:10988661-11007927    | 15.2997  | 15.8576  | 0.0517  | 0.492853 |
| <i>Ppil4</i>         | chr10:7792890-7823135     | 24.1484  | 25.0211  | 0.0512  | 0.556378 |
| <i>Gtf2i</i>         | chr5:134237833-134314760  | 43.9787  | 43.8469  | -0.0043 | 0.917155 |
| <i>Ppp2cb</i>        | chr8:33599620-33619794    | 30.8305  | 30.5528  | -0.0131 | 0.852197 |
| <i>Yipf2</i>         | chr9:21588708-21592831    | 16.8546  | 16.6298  | -0.0194 | 0.854372 |
| <i>Klhl18</i>        | chr9:110425927-110476694  | 5.2701   | 5.4892   | 0.0588  | 0.431728 |
| <i>Mgrn1</i>         | chr16:4886099-4938296     | 15.1228  | 15.0155  | -0.0103 | 0.809516 |
| <i>C2cd2</i>         | chr16:97855209-97922633   | 2.7850   | 2.9348   | 0.0756  | 0.663501 |
| <i>Pcgf5</i>         | chr19:36379066-36456192   | 19.8217  | 20.5632  | 0.0530  | 0.414393 |
| <i>Ptprc</i>         | chr1:138062860-138175706  | 549.9917 | 548.1149 | -0.0049 | 0.928709 |

|                      |                           |         |         |         |          |
|----------------------|---------------------------|---------|---------|---------|----------|
| <i>Pfdn1</i>         | chr18:36403678-36454495   | 26.1518 | 25.3926 | -0.0425 | 0.813310 |
| <i>Zbtb6</i>         | chr2:37425499-37443171    | 15.5486 | 16.1356 | 0.0535  | 0.572666 |
| <i>Ankrd13c</i>      | chr3:157947413-158006833  | 21.4498 | 21.2688 | -0.0122 | 0.853488 |
| <i>2010002M12Rik</i> | chr19:34617048-34640743   | 1.9192  | 1.8512  | -0.0521 | 0.764287 |
| <i>Sesn1</i>         | chr10:41810573-41908424   | 56.7513 | 55.9898 | -0.0195 | 0.865370 |
| <i>Cdc42se2</i>      | chr11:54717455-54787675   | 83.2364 | 82.7654 | -0.0082 | 0.892450 |
| <i>Tmem39b</i>       | chr4:129676354-129696838  | 2.7581  | 2.9521  | 0.0981  | 0.616296 |
| <i>Usp25</i>         | chr16:77014068-77116779   | 70.3858 | 72.2963 | 0.0386  | 0.177152 |
| <i>Ctps2</i>         | chrX:162901237-163032508  | 28.4442 | 29.4037 | 0.0479  | 0.498658 |
| <i>Smad3</i>         | chr9:63646766-63757994    | 17.5736 | 17.4407 | -0.0110 | 0.882428 |
| <i>Bad</i>           | chr19:6941860-6951898     | 7.1168  | 6.9343  | -0.0375 | 0.801999 |
| <i>Vps16</i>         | chr2:130424338-130444269  | 43.5857 | 43.4847 | -0.0033 | 0.939573 |
| <i>Gm14420</i>       | chr2:177464732-177478129  | 1.9953  | 1.8726  | -0.0916 | 0.772686 |
| <i>Hdac3</i>         | chr18:37935843-37954988   | 19.4798 | 19.3285 | -0.0112 | 0.854896 |
| <i>D8Ertd82e</i>     | chr8:36094827-36147787    | 3.9086  | 3.8249  | -0.0312 | 0.858386 |
| <i>Ntpr</i>          | chr8:125729962-125748235  | 5.6158  | 5.4816  | -0.0349 | 0.795690 |
| <i>Psmc3</i>         | chr11:98682553-98695979   | 18.0400 | 18.6216 | 0.0458  | 0.310005 |
| <i>Sar1b</i>         | chr11:51763686-51791925   | 25.6565 | 26.6967 | 0.0573  | 0.559772 |
| <i>Ctse</i>          | chr1:131638305-131675503  | 10.5445 | 11.1463 | 0.0801  | 0.708732 |
| <i>1700021J08Rik</i> | chr4:117002165-117003012  | 24.1259 | 23.6069 | -0.0314 | 0.783710 |
| <i>Sidt1</i>         | chr16:44240179-44333196   | 29.2488 | 30.4731 | 0.0592  | 0.662974 |
| <i>Msl3l2</i>        | chr10:56106916-56116880   | 3.3340  | 3.5521  | 0.0914  | 0.634414 |
| <i>Uba7</i>          | chr9:107975504-107984060  | 40.8824 | 42.7515 | 0.0645  | 0.681850 |
| <i>2310058D17Rik</i> | chr11:58965747-58978050   | 3.8968  | 3.8040  | -0.0347 | 0.788762 |
| <i>Kctd7</i>         | chr5:130144860-130155806  | 1.4572  | 1.3925  | -0.0655 | 0.779327 |
| <i>Clec2i</i>        | chr6:128887587-128898167  | 37.5930 | 37.2214 | -0.0143 | 0.863497 |
| <i>Orai3</i>         | chr7:127769814-127775150  | 10.0295 | 9.8716  | -0.0229 | 0.785278 |
| <i>F8a</i>           | chrX:73228305-73230795    | 7.9249  | 7.8094  | -0.0212 | 0.763422 |
| <i>Dos</i>           | chr10:80130450-80140835   | 3.1451  | 3.3123  | 0.0748  | 0.616799 |
| <i>Fkbp15</i>        | chr4:62300341-62360548    | 20.9299 | 20.8605 | -0.0048 | 0.926815 |
| <i>Hdac8</i>         | chrX:102284638-102505359  | 3.9850  | 4.1769  | 0.0679  | 0.575181 |
| <i>Sts1a4</i>        | chr1:95587683-95667594    | 36.2277 | 35.7238 | -0.0202 | 0.860937 |
| <i>Tmed8</i>         | chr12:87166241-87200229   | 10.0288 | 10.3713 | 0.0484  | 0.440830 |
| <i>Pex1</i>          | chr5:3596065-3637232      | 3.8136  | 3.7751  | -0.0146 | 0.808580 |
| <i>Rpl36a</i>        | chrX:134585653-134588062  | 5.7160  | 6.0183  | 0.0743  | 0.481593 |
| <i>Ddx11</i>         | chr17:66123519-66152167   | 12.6904 | 12.5465 | -0.0165 | 0.852262 |
| <i>Lmbrd2</i>        | chr15:9140620-9198318     | 4.5418  | 4.7637  | 0.0688  | 0.598383 |
| <i>5031434O11Rik</i> | chr3:51559756-51567117    | 3.2209  | 3.3820  | 0.0704  | 0.499653 |
| <i>Saal1</i>         | chr7:46686107-46710680    | 3.1455  | 3.0865  | -0.0273 | 0.817717 |
| <i>Gm26885</i>       | chr17:29461895-29491925   | 26.3848 | 27.6575 | 0.0680  | 0.679664 |
| <i>Spice1</i>        | chr16:44347120-44388497   | 12.0097 | 11.8870 | -0.0148 | 0.861717 |
| <i>Rfwd2</i>         | chr1:159232325-159347580  | 5.2096  | 5.4167  | 0.0562  | 0.498316 |
| <i>Pomt1</i>         | chr2:32236589-32255005    | 2.0791  | 2.1802  | 0.0685  | 0.460619 |
| <i>Gm25835</i>       | chr11:69668851-69668995   | 82.7367 | 89.1646 | 0.1079  | 0.775138 |
| <i>Pafah1b1</i>      | chr11:74673948-74724670   | 46.1119 | 47.5403 | 0.0440  | 0.475786 |
| <i>Abhd17c</i>       | chr7:84109355-84151893    | 7.7949  | 8.1642  | 0.0668  | 0.569663 |
| <i>Zfp719</i>        | chr7:43579609-43593235    | 10.5595 | 10.4724 | -0.0119 | 0.832851 |
| <i>Mb21d1</i>        | chr9:78430525-78443237    | 2.1142  | 2.0598  | -0.0376 | 0.644045 |
| <i>Rwdd2b</i>        | chr16:87433406-87440573   | 6.3789  | 6.2277  | -0.0346 | 0.761592 |
| <i>Gm24105</i>       | chr5:149247953-149248244  | 14.9948 | 14.0280 | -0.0961 | 0.775983 |
| <i>Rpl19</i>         | chr11:98026709-98030492   | 16.2007 | 15.7285 | -0.0427 | 0.804493 |
| <i>Kdm5a</i>         | chr6:120364098-120444574  | 32.4970 | 32.4348 | -0.0028 | 0.951534 |
| <i>Klc3</i>          | chr7:19394436-19404104    | 7.3623  | 7.2279  | -0.0266 | 0.819676 |
| <i>Sucla2</i>        | chr14:73525318-73596142   | 15.3229 | 15.1412 | -0.0172 | 0.836792 |
| <i>4930519F09Rik</i> | chr10:28880920-28923507   | 8.9625  | 9.4384  | 0.0746  | 0.646744 |
| <i>Mir546</i>        | chr10:126998439-126998560 | 63.9298 | 61.5746 | -0.0542 | 0.811584 |
| <i>Mapk9</i>         | chr11:49846750-49886421   | 15.8109 | 15.7610 | -0.0046 | 0.909282 |
| <i>Katnal1</i>       | chr5:148874331-148995223  | 0.7579  | 0.7330  | -0.0482 | 0.777864 |
| <i>Zfp746</i>        | chr6:48062394-48086593    | 19.4931 | 20.1281 | 0.0462  | 0.347858 |
| <i>Gm16933</i>       | chr8:25037051-25041757    | 20.2885 | 19.9413 | -0.0249 | 0.845320 |
| <i>Spes3</i>         | chr8:54520432-54529998    | 40.2564 | 39.8554 | -0.0144 | 0.866944 |
| <i>Uxt</i>           | chrX:20941721-20962017    | 4.6200  | 4.8731  | 0.0770  | 0.385515 |
| <i>Oplah</i>         | chr15:76296596-76328015   | 4.0567  | 3.9927  | -0.0229 | 0.838716 |
| <i>Crebrf</i>        | chr17:26715649-26776635   | 35.6413 | 35.4283 | -0.0086 | 0.898360 |
| <i>NA</i>            | chr17:32403005-32404698   | 60.7680 | 60.2096 | -0.0133 | 0.885283 |
| <i>Wdr11</i>         | chr7:129591862-129635738  | 6.6601  | 6.9084  | 0.0528  | 0.565630 |
| <i>Gtppb2</i>        | chr17:46161031-46169370   | 31.2932 | 31.0687 | -0.0104 | 0.904239 |
| <i>Fgfr1op2</i>      | chr6:146577202-146599198  | 30.5648 | 31.4713 | 0.0422  | 0.220938 |
| <i>Kif1c</i>         | chr11:70700547-70731964   | 8.1581  | 8.4645  | 0.0532  | 0.524727 |
| <i>Akr1e1</i>        | chr13:4590756-4609174     | 1.5066  | 1.4120  | -0.0936 | 0.799155 |
| <i>Dhx34</i>         | chr7:16197146-16222037    | 8.4575  | 8.3675  | -0.0154 | 0.876516 |



|                      |                           |         |         |         |          |
|----------------------|---------------------------|---------|---------|---------|----------|
| <i>Hnrnpul1</i>      | chr7:25721497-25754730    | 79.8663 | 79.5207 | -0.0063 | 0.928603 |
| <i>Snora3</i>        | chr7:109520119-109520251  | 36.9052 | 35.4990 | -0.0560 | 0.703063 |
| <i>Csad</i>          | chr15:102176997-102189043 | 4.7737  | 4.6587  | -0.0352 | 0.796589 |
| <i>Camk2g</i>        | chr14:20734874-20794088   | 15.6126 | 15.5452 | -0.0062 | 0.872146 |
| <i>Ccndbp1</i>       | chr2:121008402-121016904  | 21.0252 | 20.8150 | -0.0145 | 0.860708 |
| <i>Cnbd2</i>         | chr2:156312298-156375638  | 5.1184  | 4.9961  | -0.0349 | 0.806629 |
| <i>Ube2r2</i>        | chr4:41135742-41193380    | 21.7443 | 21.4885 | -0.0171 | 0.862214 |
| <i>Bag5</i>          | chr12:111709487-111713257 | 13.5150 | 14.0287 | 0.0538  | 0.495153 |
| <i>Kif21b</i>        | chr1:136131388-136177998  | 67.4528 | 70.0960 | 0.0555  | 0.646976 |
| <i>Nudt6</i>         | chr3:37404909-37420211    | 9.2361  | 9.6628  | 0.0652  | 0.456715 |
| <i>Wdr61</i>         | chr9:54714734-54734519    | 9.9516  | 10.3170 | 0.0520  | 0.521257 |
| <i>Atxn7l3b</i>      | chr10:112925437-112929026 | 37.7728 | 37.5415 | -0.0089 | 0.884234 |
| <i>Smc6</i>          | chr12:11265885-11319785   | 51.6156 | 53.5873 | 0.0541  | 0.631945 |
| <i>Rnf144a</i>       | chr12:26306796-26415256   | 9.8462  | 9.7220  | -0.0183 | 0.867020 |
| <i>Twistnb</i>       | chr12:33429623-33439380   | 18.3787 | 18.1528 | -0.0178 | 0.822017 |
| <i>C78339</i>        | chr13:46669521-46678056   | 22.6352 | 23.4527 | 0.0512  | 0.556878 |
| <i>Rpl15</i>         | chr14:18267822-18271391   | 13.6874 | 14.2442 | 0.0575  | 0.589857 |
| <i>BC002059</i>      | chr17:16972909-16973770   | 22.7671 | 22.4318 | -0.0214 | 0.776531 |
| <i>Stk11ip</i>       | chr1:75521528-75537335    | 8.6834  | 9.0750  | 0.0636  | 0.667032 |
| <i>Shhg4</i>         | chr18:35553409-35558316   | 7.0288  | 6.8234  | -0.0428 | 0.703821 |
| <i>Tmx2</i>          | chr2:84671315-84679140    | 8.0008  | 8.3194  | 0.0563  | 0.219514 |
| <i>2510009E07Rik</i> | chr16:21649044-21694665   | 2.9924  | 2.9330  | -0.0290 | 0.813332 |
| <i>Mmp11</i>         | chr10:75923221-75932502   | 2.2253  | 2.5836  | 0.2154  | 0.653838 |
| <i>Fau</i>           | chr19:6057887-6059524     | 17.3562 | 16.9318 | -0.0357 | 0.802867 |
| <i>Casp6</i>         | chr3:129901424-129914103  | 8.6052  | 8.4589  | -0.0247 | 0.725748 |
| <i>Hdac2</i>         | chr10:36974543-37001889   | 23.9446 | 23.6419 | -0.0184 | 0.859474 |
| <i>Stx16</i>         | chr2:174076307-174099771  | 26.1587 | 27.1792 | 0.0552  | 0.615006 |
| <i>Lats1</i>         | chr10:7681208-7716458     | 13.1442 | 13.6429 | 0.0537  | 0.600852 |
| <i>Cdk12</i>         | chr11:98203058-98278504   | 24.0247 | 23.9471 | -0.0047 | 0.941545 |
| <i>Acly</i>          | chr11:100476352-100528000 | 73.6550 | 72.4153 | -0.0245 | 0.877302 |
| <i>Zfp865</i>        | chr7:5020375-5033138      | 8.4877  | 8.3812  | -0.0182 | 0.877773 |
| <i>Uba5</i>          | chr9:104046598-104063134  | 17.9034 | 17.7513 | -0.0123 | 0.850857 |
| <i>Oxsm</i>          | chr14:16238655-16249808   | 5.8524  | 5.7816  | -0.0175 | 0.820305 |
| <i>Rnf31</i>         | chr14:55591707-55603693   | 23.2957 | 24.1787 | 0.0537  | 0.603148 |
| <i>Brwd1</i>         | chr16:95992091-96082526   | 16.6488 | 16.5653 | -0.0073 | 0.922873 |
| <i>Armc9</i>         | chr1:86154779-86278284    | 0.8804  | 0.8607  | -0.0328 | 0.728527 |
| <i>Smg1</i>          | chr7:118131307-118243637  | 45.0006 | 46.7219 | 0.0542  | 0.631925 |
| <i>Rpp30</i>         | chr19:36083715-36104772   | 11.4685 | 11.1346 | -0.0426 | 0.793148 |
| <i>Stk19</i>         | chr17:34823992-34836945   | 2.7233  | 2.6549  | -0.0367 | 0.734464 |
| <i>Gpatch1</i>       | chr7:35276535-35318440    | 6.5491  | 6.8088  | 0.0561  | 0.266369 |
| <i>Btbd2</i>         | chr10:80642616-80657071   | 9.2610  | 9.0990  | -0.0255 | 0.870579 |
| <i>Kcnmb4</i>        | chr10:116417860-116473878 | 4.7263  | 4.6059  | -0.0372 | 0.825585 |
| <i>Toporsos</i>      | chr4:40269568-40270940    | 15.5235 | 16.3678 | 0.0764  | 0.702906 |
| <i>Bnip1</i>         | chr17:26781078-26792565   | 4.3538  | 4.5314  | 0.0577  | 0.423647 |
| <i>Dynlt3</i>        | chrX:9654266-9663003      | 8.1658  | 8.6650  | 0.0856  | 0.752661 |
| <i>Ict1</i>          | chr11:115403751-115412674 | 16.9797 | 16.7208 | -0.0222 | 0.846442 |
| <i>Usp22</i>         | chr11:61151784-61175055   | 20.9277 | 20.8563 | -0.0049 | 0.929487 |
| <i>Pdcd11</i>        | chr19:47090765-47131143   | 19.5549 | 19.4505 | -0.0077 | 0.916026 |
| <i>Spca2</i>         | chr7:99837568-99858883    | 38.4944 | 39.6550 | 0.0429  | 0.360657 |
| <i>Tubgcp4</i>       | chr2:121170653-121198770  | 15.1593 | 15.1155 | -0.0042 | 0.930937 |
| <i>Swsap1</i>        | chr9:21955752-21958270    | 4.4641  | 4.6883  | 0.0707  | 0.428369 |
| <i>Fbxl5</i>         | chr5:43744615-43821639    | 16.5201 | 16.4014 | -0.0104 | 0.890721 |
| <i>Zfp654</i>        | chr16:64780350-64786321   | 14.6151 | 15.1795 | 0.0547  | 0.631042 |
| <i>Uba6</i>          | chr5:86110719-86172803    | 11.2634 | 11.6830 | 0.0528  | 0.593682 |
| <i>Zfp11</i>         | chr5:129654592-129670099  | 1.3685  | 1.4739  | 0.1071  | 0.655223 |
| <i>Arpp19</i>        | chr9:75037613-75060313    | 11.8199 | 11.5992 | -0.0272 | 0.841347 |
| <i>Uckl1os</i>       | chr2:181578479-181585170  | 10.6627 | 10.5401 | -0.0167 | 0.855615 |
| <i>Notch1</i>        | chr2:26457902-26516663    | 17.9801 | 19.2517 | 0.0986  | 0.695999 |
| <i>Pds5b</i>         | chr5:150673738-150810690  | 10.9989 | 11.3586 | 0.0464  | 0.519308 |
| <i>Gm11613</i>       | chr11:97644183-97660367   | 3.8251  | 3.7095  | -0.0443 | 0.786271 |
| <i>Strada</i>        | chr11:106163329-106202168 | 8.1388  | 8.0912  | -0.0085 | 0.865144 |
| <i>Rhbf2</i>         | chr11:116598164-116627019 | 3.8952  | 4.0884  | 0.0698  | 0.632224 |
| <i>B3gntl1</i>       | chr11:121616196-121673153 | 10.9013 | 10.7474 | -0.0205 | 0.874623 |
| <i>Dtd2</i>          | chr12:51988311-52006501   | 2.9852  | 3.1535  | 0.0791  | 0.626884 |
| <i>Hsd17b11</i>      | chr5:103989761-104021919  | 4.2440  | 4.1444  | -0.0343 | 0.822385 |
| <i>Rfc5</i>          | chr5:117378102-117389047  | 8.1099  | 8.0180  | -0.0164 | 0.851856 |
| <i>Ccdc174</i>       | chr6:91878052-91899843    | 6.8356  | 7.0444  | 0.0434  | 0.175462 |
| <i>Slc10a7</i>       | chr8:78509334-78734005    | 9.5586  | 9.4769  | -0.0124 | 0.846796 |
| <i>Kctd9</i>         | chr14:67715936-67742310   | 3.9567  | 4.1665  | 0.0745  | 0.692227 |
| <i>Zfp54</i>         | chr17:21423226-21435640   | 5.9894  | 5.8704  | -0.0290 | 0.785291 |
| <i>Atrnl1</i>        | chr19:57611033-58133338   | 1.3706  | 1.4418  | 0.0730  | 0.552718 |

|                      |                           |          |          |         |          |
|----------------------|---------------------------|----------|----------|---------|----------|
| <i>Pcmdt1</i>        | chr1:7088919-7173628      | 20.2412  | 20.0606  | -0.0129 | 0.878601 |
| <i>Rpl7</i>          | chr1:16101294-16104662    | 221.9362 | 217.5509 | -0.0288 | 0.859750 |
| <i>Tmem194b</i>      | chr1:52630704-52651919    | 23.6363  | 24.4531  | 0.0490  | 0.557034 |
| <i>Pik3c2b</i>       | chr1:133045666-133108687  | 0.7273   | 0.7077   | -0.0394 | 0.739833 |
| <i>Scg5</i>          | chr2:113776361-113829121  | 3.7454   | 3.9662   | 0.0826  | 0.491402 |
| <i>Cp</i>            | chr3:19957053-20009145    | 0.7476   | 0.7969   | 0.0922  | 0.670430 |
| <i>5730508B09Rik</i> | chr3:127869687-127896323  | 7.0117   | 6.7924   | -0.0458 | 0.791657 |
| <i>Reck</i>          | chr4:43875529-43944806    | 0.9823   | 0.9445   | -0.0566 | 0.719918 |
| <i>Zfp850</i>        | chr7:27988711-28008416    | 12.0693  | 11.8385  | -0.0278 | 0.827656 |
| <i>BC004004</i>      | chr17:29268787-29302881   | 7.6186   | 7.9309   | 0.0580  | 0.642547 |
| <i>Znhit6</i>        | chr3:145576207-145605245  | 2.9202   | 2.8502   | -0.0350 | 0.694758 |
| <i>Ehd1</i>          | chr19:6276724-6300096     | 4.4852   | 4.3844   | -0.0328 | 0.826012 |
| <i>Mtrf1</i>         | chr14:79397771-79423650   | 2.3016   | 2.4590   | 0.0954  | 0.630323 |
| <i>Gm20441</i>       | chr10:75771450-75780954   | 7.0532   | 7.5648   | 0.1010  | 0.678669 |
| <i>Bbs10</i>         | chr10:111298678-111301736 | 3.5146   | 3.4194   | -0.0396 | 0.755164 |
| <i>Nabp2</i>         | chr10:128401394-128411492 | 8.5733   | 8.9275   | 0.0584  | 0.416039 |
| <i>Mpp5</i>          | chr12:78748946-78840711   | 10.4750  | 10.3589  | -0.0161 | 0.858499 |
| <i>Prr14l</i>        | chr5:32789217-32854256    | 15.0921  | 15.6146  | 0.0491  | 0.542566 |
| <i>Rltpr</i>         | chr8:105690905-105698178  | 25.4962  | 26.7246  | 0.0679  | 0.680742 |
| <i>Mir17hg</i>       | chr14:115042878-115046727 | 16.9421  | 16.6732  | -0.0231 | 0.857030 |
| <i>Usf1</i>          | chr1:171411312-171419142  | 22.9136  | 22.7097  | -0.0129 | 0.878500 |
| <i>Ankrd16</i>       | chr2:11777875-11790325    | 15.8961  | 15.7928  | -0.0094 | 0.908356 |
| <i>Fam188a</i>       | chr2:12347262-12419469    | 14.5426  | 15.0211  | 0.0467  | 0.443948 |
| <i>Larp7</i>         | chr3:127536953-127553348  | 22.7186  | 23.5931  | 0.0545  | 0.585843 |
| <i>Pde4b</i>         | chr4:102087542-102607259  | 16.3855  | 16.8635  | 0.0415  | 0.406408 |
| <i>Pias4</i>         | chr10:81153265-81167923   | 7.6062   | 7.5573   | -0.0093 | 0.856453 |
| <i>Igtp</i>          | chr11:58199555-58207591   | 171.3168 | 170.0161 | -0.0110 | 0.909648 |
| <i>Nfu1</i>          | chr6:87009235-87028461    | 12.0189  | 12.4899  | 0.0555  | 0.524342 |
| <i>Chp1</i>          | chr2:119547696-119587027  | 18.6561  | 18.4215  | -0.0183 | 0.868142 |
| <i>Phf12</i>         | chr11:77982753-78030539   | 18.4288  | 19.1794  | 0.0576  | 0.659268 |
| <i>Papola</i>        | chr12:105784693-105838944 | 37.1613  | 37.0843  | -0.0030 | 0.953348 |
| <i>Morf4l2</i>       | chrX:136732941-136743690  | 12.6456  | 13.1151  | 0.0526  | 0.573294 |
| <i>Cdh24</i>         | chr14:54631991-54641364   | 5.0127   | 4.8831   | -0.0378 | 0.854478 |
| <i>Aven</i>          | chr2:112492963-112634573  | 10.5454  | 11.0156  | 0.0629  | 0.698722 |
| <i>Sync</i>          | chr4:129287616-129308559  | 1.8580   | 1.9706   | 0.0850  | 0.371127 |
| <i>Nt5dc3</i>        | chr10:86779004-86838389   | 2.4996   | 2.4487   | -0.0297 | 0.859320 |
| <i>Btbd19</i>        | chr4:117119218-117125725  | 6.6231   | 6.8606   | 0.0508  | 0.297341 |
| <i>Psmg4</i>         | chr13:34162963-34178172   | 26.4272  | 25.7060  | -0.0399 | 0.805149 |
| <i>Gm26640</i>       | chr6:72953235-72957249    | 3.9534   | 4.2611   | 0.1081  | 0.771924 |
| <i>NA</i>            | chr9:45954100-45955998    | 10.6087  | 11.2017  | 0.0785  | 0.676372 |
| <i>Ndufa1</i>        | chrX:37187587-37191163    | 52.1740  | 54.7888  | 0.0705  | 0.686759 |
| <i>Bin3</i>          | chr14:70100144-70138191   | 24.7977  | 25.7340  | 0.0535  | 0.566190 |
| <i>Polr3k</i>        | chr2:181864336-181870830  | 9.3801   | 9.2471   | -0.0206 | 0.817673 |
| <i>Magoh</i>         | chr4:107879754-107887424  | 55.0638  | 53.9310  | -0.0300 | 0.845334 |
| <i>Bcdin3d</i>       | chr15:99470083-99474730   | 11.5289  | 11.3222  | -0.0261 | 0.841213 |
| <i>Cyb5r1</i>        | chr1:134405780-134411740  | 5.2819   | 5.4925   | 0.0564  | 0.475375 |
| <i>Mtrf1l</i>        | chr10:5811886-5823910     | 8.9505   | 8.8666   | -0.0136 | 0.809823 |
| <i>Gna13</i>         | chr11:109362830-109401369 | 44.9578  | 46.5398  | 0.0499  | 0.628768 |
| <i>Esyt2</i>         | chr12:116281221-116373096 | 106.4057 | 105.9937 | -0.0056 | 0.936589 |
| <i>Slc5a6</i>        | chr5:31036035-31048924    | 2.8155   | 2.7671   | -0.0250 | 0.690805 |
| <i>Dgkq</i>          | chr5:108646692-108669672  | 10.3165  | 10.7066  | 0.0535  | 0.623005 |
| <i>2610020H08Rik</i> | chr7:119794005-119848943  | 7.2047   | 7.4837   | 0.0548  | 0.500713 |
| <i>Prrt2</i>         | chr7:127016770-127021211  | 4.3599   | 4.5466   | 0.0605  | 0.332579 |
| <i>4930594M22Rik</i> | chr14:122913029-122937469 | 1.3216   | 1.4049   | 0.0881  | 0.530670 |
| <i>Slc25a1</i>       | chr16:17925210-17928219   | 12.0663  | 12.5215  | 0.0534  | 0.450158 |
| <i>Sft2d3</i>        | chr18:31909093-31911903   | 8.7534   | 9.0991   | 0.0559  | 0.492585 |
| <i>Zbtb34</i>        | chr2:33406107-33431324    | 1.5973   | 1.6819   | 0.0744  | 0.522845 |
| <i>Sp3os</i>         | chr2:72979423-72988677    | 8.3793   | 8.1327   | -0.0431 | 0.784179 |
| <i>Gm10704</i>       | chr3:88576244-88577208    | 6.2953   | 6.0843   | -0.0492 | 0.747961 |
| <i>Prpf4b</i>        | chr13:34875493-34902877   | 88.8344  | 88.4785  | -0.0058 | 0.923289 |
| <i>Ppp2r5c</i>       | chr12:110485738-110583061 | 77.9974  | 77.5257  | -0.0088 | 0.905524 |
| <i>Fam133b</i>       | chr5:3543843-3569810      | 23.1755  | 24.0581  | 0.0539  | 0.584625 |
| <i>Tmem184a</i>      | chr5:139802484-139819917  | 1.4942   | 1.4583   | -0.0351 | 0.735841 |
| <i>Tbc1d17</i>       | chr7:44840900-44849079    | 16.9964  | 16.8465  | -0.0128 | 0.898578 |
| <i>Lphn1</i>         | chr8:83900104-83941954    | 10.4697  | 10.9493  | 0.0646  | 0.683728 |
| <i>Rad1</i>          | chr15:10486017-10499063   | 4.1096   | 4.0543   | -0.0195 | 0.822768 |
| <i>Chadl</i>         | chr15:81678295-81697287   | 2.0683   | 2.1717   | 0.0704  | 0.448063 |
| <i>Crkl</i>          | chr16:17451986-17486255   | 23.1557  | 23.9332  | 0.0476  | 0.486188 |
| <i>Slc25a51</i>      | chr4:45395922-45408766    | 14.7301  | 15.2248  | 0.0477  | 0.476428 |
| <i>Kin</i>           | chr2:10080592-10092806    | 20.9839  | 21.7923  | 0.0545  | 0.615573 |
| <i>Pan3</i>          | chr5:147430160-147548502  | 40.3622  | 40.2614  | -0.0036 | 0.951185 |

|                      |                           |         |         |         |          |
|----------------------|---------------------------|---------|---------|---------|----------|
| <i>Atp8b4</i>        | chr2:126320972-126500674  | 14.1881 | 14.0093 | -0.0183 | 0.887230 |
| <i>Trim68</i>        | chr7:102677579-102687326  | 6.2470  | 6.5497  | 0.0683  | 0.655102 |
| <i>Thrap3</i>        | chr4:126164081-126202760  | 29.1719 | 29.9981 | 0.0403  | 0.367997 |
| <i>Ccdc62</i>        | chr5:123927417-123969895  | 2.0339  | 1.9436  | -0.0655 | 0.821455 |
| <i>Susd1</i>         | chr4:59314682-59438633    | 1.9705  | 2.0663  | 0.0685  | 0.533298 |
| <i>Lrrc75aos2</i>    | chr11:62605765-62607748   | 4.2046  | 4.4861  | 0.0935  | 0.604433 |
| <i>Vps53</i>         | chr11:76046225-76179647   | 10.8623 | 10.8077 | -0.0073 | 0.851840 |
| <i>Zc3h14</i>        | chr12:98746967-98787774   | 32.6175 | 33.6341 | 0.0443  | 0.515039 |
| <i>Ppp1r13b</i>      | chr12:111828457-111908055 | 17.0718 | 16.9407 | -0.0111 | 0.912653 |
| <i>Mta1</i>          | chr12:113098277-113137206 | 20.4182 | 20.2725 | -0.0103 | 0.912425 |
| <i>Trmt2b</i>        | chrX:134222338-134276984  | 9.7449  | 9.6701  | -0.0111 | 0.840246 |
| <i>Yeats2</i>        | chr16:20141062-20232573   | 13.4482 | 13.9372 | 0.0515  | 0.557942 |
| <i>B230307C23Rik</i> | chr16:97997322-98010000   | 8.2103  | 8.5996  | 0.0668  | 0.541236 |
| <i>Wbp1l</i>         | chr19:46599083-46657389   | 28.2722 | 28.1682 | -0.0053 | 0.943354 |
| <i>Tmem234</i>       | chr4:129600667-129624059  | 41.9829 | 41.7431 | -0.0083 | 0.903610 |
| <i>Parp10</i>        | chr15:76231173-76243441   | 27.4294 | 27.1333 | -0.0157 | 0.901050 |
| <i>Bcl2l13</i>       | chr6:120836229-120892842  | 7.5528  | 7.8100  | 0.0483  | 0.462069 |
| <i>Mcmbp</i>         | chr7:128696440-128740495  | 42.6184 | 42.5950 | -0.0008 | 0.982766 |
| <i>Gtf2e1</i>        | chr16:37509789-37539789   | 5.4000  | 5.3499  | -0.0135 | 0.835714 |
| <i>Dstyk</i>         | chr1:132417452-132466959  | 5.8609  | 5.8108  | -0.0124 | 0.881674 |
| <i>Hspa9</i>         | chr18:34937413-34954357   | 61.1112 | 60.8082 | -0.0072 | 0.912304 |
| <i>Otud1</i>         | chr2:19658061-19660590    | 15.8269 | 15.7206 | -0.0097 | 0.883073 |
| <i>Snapc4</i>        | chr2:26362764-26380653    | 12.6888 | 13.1343 | 0.0498  | 0.570155 |
| <i>Fbxw7</i>         | chr3:84815267-84979198    | 13.0252 | 13.0097 | -0.0017 | 0.956487 |
| <i>Alg2</i>          | chr4:47465066-47474333    | 8.2484  | 8.1303  | -0.0208 | 0.884953 |
| <i>4933439C10Rik</i> | chr11:59505661-59513647   | 2.6500  | 2.6142  | -0.0197 | 0.794984 |
| <i>Fkbp5</i>         | chr17:28399094-28517524   | 9.4465  | 9.3015  | -0.0223 | 0.877139 |
| <i>Gbe1</i>          | chr16:70313948-70569716   | 5.4602  | 5.3965  | -0.0169 | 0.836055 |
| <i>Dpf2</i>          | chr19:5896515-5913010     | 10.1609 | 10.1124 | -0.0069 | 0.920317 |
| <i>Usp20</i>         | chr2:30982278-31023586    | 2.6100  | 2.5670  | -0.0240 | 0.876777 |
| <i>Gins4</i>         | chr8:23226609-23237668    | 25.8198 | 25.4596 | -0.0203 | 0.850510 |
| <i>Haghl</i>         | chr17:25779842-25785673   | 10.2121 | 10.0305 | -0.0259 | 0.869439 |
| <i>D2hgdh</i>        | chr1:93825239-93852348    | 5.6354  | 5.8429  | 0.0522  | 0.315172 |
| <i>Bbs2</i>          | chr8:94067953-94098811    | 6.7628  | 7.0599  | 0.0620  | 0.683478 |
| <i>Txk</i>           | chr5:72695977-72752773    | 70.9650 | 70.7827 | -0.0037 | 0.946714 |
| <i>Rnf10</i>         | chr5:115241411-115272898  | 16.9441 | 16.8051 | -0.0119 | 0.916832 |
| <i>Hemk1</i>         | chr9:107327691-107338350  | 3.5000  | 3.4309  | -0.0288 | 0.832656 |
| <i>Ubr2</i>          | chr17:46928291-47010532   | 26.3320 | 27.2203 | 0.0479  | 0.609876 |
| <i>Zfp661</i>        | chr2:127574661-127587094  | 1.9772  | 1.9198  | -0.0425 | 0.812703 |
| <i>Cyp4f17</i>       | chr17:32506461-32528894   | 4.2421  | 4.1382  | -0.0358 | 0.728406 |
| <i>Plgrkt</i>        | chr19:29348598-29367390   | 40.0603 | 41.3828 | 0.0469  | 0.578226 |
| <i>Art4</i>          | chr6:136848450-136857733  | 3.3309  | 3.2447  | -0.0378 | 0.761288 |
| <i>Lrrc57</i>        | chr2:120604237-120609520  | 7.9623  | 7.8778  | -0.0154 | 0.789417 |
| <i>Yeats4</i>        | chr10:117215141-117224507 | 42.0742 | 43.6651 | 0.0535  | 0.628156 |
| <i>Cwc15</i>         | chr9:14500616-14510577    | 77.1390 | 75.7223 | -0.0267 | 0.862003 |
| <i>Gbbp1</i>         | chr13:111425679-111490111 | 67.8230 | 70.1698 | 0.0491  | 0.617395 |
| <i>Zranb2</i>        | chr3:157534159-157548390  | 35.3028 | 34.9474 | -0.0146 | 0.886241 |
| <i>Map4k5</i>        | chr12:69803749-69893200   | 3.0129  | 2.9741  | -0.0187 | 0.854154 |
| <i>Agps</i>          | chr2:75832176-75931350    | 14.3810 | 14.3171 | -0.0064 | 0.915109 |
| <i>Prdx4</i>         | chrX:155323917-155340754  | 7.1968  | 7.0071  | -0.0385 | 0.829280 |
| <i>Hdgf</i>          | chr3:87906320-87916132    | 37.5492 | 37.1354 | -0.0160 | 0.886368 |
| <i>Morc2a</i>        | chr11:3649493-3690477     | 14.7668 | 15.2804 | 0.0493  | 0.590199 |
| <i>Mettl2</i>        | chr11:105126424-105140394 | 10.5357 | 10.4542 | -0.0112 | 0.882150 |
| <i>Rpia</i>          | chr6:70765719-70792232    | 7.2574  | 7.5441  | 0.0559  | 0.630057 |
| <i>Gm5914</i>        | chr8:105624335-105637485  | 14.5540 | 15.3579 | 0.0776  | 0.497914 |
| <i>Bcl9l</i>         | chr9:44499135-44510388    | 4.3979  | 4.6646  | 0.0849  | 0.738945 |
| <i>Tbc1d2b</i>       | chr9:90202046-90270804    | 12.3797 | 12.7760 | 0.0455  | 0.550452 |
| <i>Rab12</i>         | chr17:66494511-66519717   | 8.7102  | 9.0852  | 0.0608  | 0.649475 |
| <i>1700007L15Rik</i> | chr16:33379854-33380727   | 6.2006  | 5.9601  | -0.0571 | 0.728847 |
| <i>2410004B18Rik</i> | chr3:145938013-145944829  | 14.6792 | 14.5066 | -0.0171 | 0.831622 |
| <i>Ric8</i>          | chr7:140856956-140863730  | 27.9257 | 27.9102 | -0.0008 | 0.985739 |
| <i>Gm16638</i>       | chr7:83597047-83631842    | 2.9408  | 3.1221  | 0.0863  | 0.663693 |
| <i>Fadd</i>          | chr7:144577317-144582463  | 4.6838  | 4.6289  | -0.0170 | 0.857787 |
| <i>Med4</i>          | chr14:73510048-73518545   | 26.7985 | 26.5006 | -0.0161 | 0.857921 |
| <i>Gm12227</i>       | chr11:54728676-54734323   | 8.5829  | 9.2076  | 0.1014  | 0.666092 |
| <i>Iba57</i>         | chr11:59155368-59163739   | 3.1229  | 3.2615  | 0.0627  | 0.518763 |
| <i>Vat1</i>          | chr11:101458744-101466230 | 5.3557  | 5.6004  | 0.0644  | 0.511642 |
| <i>Dus4l</i>         | chr12:31640054-31654826   | 4.9431  | 4.7764  | -0.0495 | 0.810807 |
| <i>Wbscr16</i>       | chr5:134148053-134176774  | 5.4967  | 5.7236  | 0.0583  | 0.284911 |
| <i>Phrf1</i>         | chr7:141228783-141262750  | 22.6134 | 22.5025 | -0.0071 | 0.937567 |
| <i>Aktip</i>         | chr8:91112040-91134465    | 16.4068 | 16.9597 | 0.0478  | 0.532333 |

|                      |                           |          |          |         |          |
|----------------------|---------------------------|----------|----------|---------|----------|
| <i>Wnk3</i>          | chrX:151198139-151320152  | 0.4616   | 0.4965   | 0.1053  | 0.675969 |
| <i>Paglut1</i>       | chr16:38525136-38550258   | 12.3878  | 12.3267  | -0.0071 | 0.913714 |
| <i>Trip12</i>        | chr1:84721188-84839304    | 64.1582  | 65.9236  | 0.0392  | 0.432030 |
| <i>Maml3</i>         | chr3:51687610-52104891    | 2.0026   | 1.9641   | -0.0280 | 0.835105 |
| <i>Gm21092</i>       | chr8:20550330-20581999    | 1.6221   | 1.5730   | -0.0444 | 0.808464 |
| <i>Snord104</i>      | chr11:106500992-106501062 | 63.7592  | 67.8493  | 0.0897  | 0.710507 |
| <i>Dip2c</i>         | chr13:9276527-9668928     | 1.9989   | 1.9215   | -0.0570 | 0.867951 |
| <i>Zfp738</i>        | chr13:67667436-67687071   | 6.5599   | 6.7998   | 0.0518  | 0.428581 |
| <i>Trbj1-1</i>       | chr6:41533863-41533911    | 97.3840  | 103.1872 | 0.0835  | 0.661106 |
| <i>O610030E20Rik</i> | chr6:72347316-72353158    | 13.5709  | 13.5465  | -0.0026 | 0.943140 |
| <i>Memo1</i>         | chr17:74200705-74294883   | 15.3105  | 15.8966  | 0.0542  | 0.518710 |
| <i>Kctd3</i>         | chr1:188971097-189007840  | 6.5463   | 6.4914   | -0.0122 | 0.883899 |
| <i>Mical3</i>        | chr6:121007240-121081609  | 2.7560   | 2.9437   | 0.0951  | 0.700134 |
| <i>Abhd14b</i>       | chr9:106448639-106452915  | 4.3243   | 4.5893   | 0.0858  | 0.622698 |
| <i>Tef</i>           | chr15:81802420-81826861   | 5.6133   | 5.8178   | 0.0516  | 0.600758 |
| <i>Serinc4</i>       | chr2:121439058-121456781  | 13.2677  | 13.1971  | -0.0077 | 0.899629 |
| <i>E2f5</i>          | chr3:14578670-14606308    | 10.6000  | 10.4508  | -0.0205 | 0.829945 |
| <i>Fancf</i>         | chr7:51860576-51862267    | 6.9241   | 6.8243   | -0.0209 | 0.828011 |
| <i>Zmat1</i>         | chrX:134971371-135009209  | 1.2566   | 1.3252   | 0.0767  | 0.431338 |
| <i>Zfp597</i>        | chr16:3858320-3884561     | 13.1819  | 13.1248  | -0.0063 | 0.913253 |
| <i>Plcx2</i>         | chr16:45959262-46010218   | 17.8391  | 18.3412  | 0.0401  | 0.377148 |
| <i>Yip1</i>          | chr4:107314362-107359823  | 5.2452   | 5.4232   | 0.0482  | 0.483886 |
| <i>D5Ertd579e</i>    | chr5:36584787-36696024    | 7.7638   | 8.0314   | 0.0489  | 0.581785 |
| <i>Trbj2-3</i>       | chr6:41543222-41543271    | 201.1591 | 211.3851 | 0.0715  | 0.540356 |
| <i>Ppapdc1b</i>      | chr8:25720060-25724887    | 6.4475   | 6.7696   | 0.0703  | 0.631675 |
| <i>Tsnax</i>         | chr8:125012996-125034192  | 35.6122  | 35.4810  | -0.0053 | 0.925733 |
| <i>Atg4a</i>         | chrX:140956906-141164270  | 6.0473   | 6.2814   | 0.0548  | 0.551657 |
| <i>Dgk1</i>          | chr1:87853286-87944489    | 80.4286  | 80.3268  | -0.0018 | 0.974484 |
| <i>Ascc1</i>         | chr10:60002804-60099990   | 16.0291  | 16.6639  | 0.0560  | 0.580964 |
| <i>Acad9</i>         | chr3:36065978-36094944    | 5.1859   | 5.1432   | -0.0119 | 0.886599 |
| <i>Thg1l</i>         | chr11:45946842-45955494   | 5.1693   | 5.3954   | 0.0618  | 0.635741 |
| <i>Zc3h12b</i>       | chrX:95711677-95932637    | 1.3792   | 1.3514   | -0.0294 | 0.836572 |
| <i>Bambi-ps1</i>     | chr2:122466934-122467526  | 41.6233  | 40.7383  | -0.0310 | 0.863643 |
| <i>Tsyp1l</i>        | chr10:34282189-34284885   | 40.9294  | 40.8032  | -0.0045 | 0.922656 |
| <i>Mapk1ip1l</i>     | chr14:47298313-47323204   | 13.5011  | 13.4418  | -0.0064 | 0.932217 |
| <i>Irak2</i>         | chr6:113638466-113695009  | 4.5129   | 4.7137   | 0.0628  | 0.622293 |
| <i>Mcm3ap</i>        | chr10:76468970-76515856   | 19.6708  | 20.3408  | 0.0483  | 0.576986 |
| <i>Glcc1</i>         | chr6:8509599-8597548      | 8.3828   | 8.6749   | 0.0494  | 0.585144 |
| <i>Mlh3</i>          | chr12:85234528-85270591   | 10.5498  | 10.4933  | -0.0077 | 0.906739 |
| <i>Ppm1g</i>         | chr5:31202667-31220545    | 55.9739  | 55.8052  | -0.0044 | 0.942690 |
| <i>Rpl37</i>         | chr15:5116612-5119140     | 137.2193 | 143.3780 | 0.0633  | 0.705283 |
| <i>Slc25a17</i>      | chr15:81318920-81360765   | 23.4771  | 23.3154  | -0.0100 | 0.858687 |
| <i>Rab11fip2</i>     | chr19:59902883-59943654   | 7.9419   | 7.9061   | -0.0065 | 0.889171 |
| <i>Ccdc181</i>       | chr1:164275584-164287847  | 3.8101   | 4.0060   | 0.0723  | 0.629475 |
| <i>Cep120</i>        | chr18:53681723-53744547   | 22.2769  | 22.9555  | 0.0433  | 0.449657 |
| <i>Rgs10</i>         | chr7:128373620-128418758  | 90.2735  | 93.9666  | 0.0578  | 0.701885 |
| <i>Homez</i>         | chr14:54852735-54870961   | 2.5610   | 2.6698   | 0.0600  | 0.608378 |
| <i>Mapk1ip1</i>      | chr7:138835822-138846273  | 11.7473  | 12.2269  | 0.0577  | 0.547470 |
| <i>Ewsr1</i>         | chr11:5069688-5099266     | 57.1115  | 57.1757  | 0.0016  | 0.968110 |
| <i>Zcchc8</i>        | chr5:123698301-123721044  | 16.9789  | 17.4801  | 0.0420  | 0.205338 |
| <i>Trbv5</i>         | chr6:41062358-41062803    | 79.0238  | 77.9978  | -0.0189 | 0.845689 |
| <i>Emp3</i>          | chr7:45918022-45921426    | 131.5003 | 130.2300 | -0.0140 | 0.899899 |
| <i>Klhl36</i>        | chr8:119862304-119876988  | 7.9434   | 7.8538   | -0.0164 | 0.856966 |
| <i>Strbp</i>         | chr2:37569867-37703859    | 4.7864   | 4.9401   | 0.0456  | 0.515185 |
| <i>Ssb</i>           | chr2:69861561-69871846    | 110.6267 | 114.5670 | 0.0505  | 0.659326 |
| <i>Sco1</i>          | chr11:67052669-67067070   | 5.4034   | 5.6299   | 0.0592  | 0.666141 |
| <i>P2rx4</i>         | chr5:122707583-122729738  | 7.7286   | 7.6473   | -0.0153 | 0.864078 |
| <i>NA</i>            | chr7:143634805-143636585  | 2.4399   | 2.6154   | 0.1002  | 0.692512 |
| <i>Tcea2</i>         | chr2:181680309-181688071  | 13.2426  | 13.1548  | -0.0096 | 0.904139 |
| <i>Tmem68</i>        | chr4:3549040-3574853      | 10.6012  | 10.4962  | -0.0144 | 0.854134 |
| <i>Sytl2</i>         | chr7:90348698-90410438    | 5.3434   | 5.5918   | 0.0656  | 0.700548 |
| <i>Usp19</i>         | chr9:108490675-108502333  | 37.3230  | 37.2383  | -0.0033 | 0.963048 |
| <i>Utp14a</i>        | chrX:48256861-48282453    | 23.4563  | 23.1943  | -0.0162 | 0.884569 |
| <i>Mpp1</i>          | chrX:75109732-75131016    | 11.9786  | 12.4055  | 0.0505  | 0.612399 |
| <i>Nt5c2</i>         | chr19:46886830-47015153   | 8.5896   | 8.8864   | 0.0490  | 0.563518 |
| <i>Acbd4</i>         | chr11:103101681-103112200 | 8.4028   | 8.3104   | -0.0159 | 0.843008 |
| <i>Slc45a4</i>       | chr15:73577423-73645762   | 2.3795   | 2.5069   | 0.0753  | 0.735497 |
| <i>Tnfrsf10</i>      | chr3:27317027-27342427    | 7.2884   | 7.5798   | 0.0565  | 0.672476 |
| <i>Sned1</i>         | chr1:93235840-93301065    | 0.8914   | 0.8757   | -0.0257 | 0.738308 |
| <i>Ints12</i>        | chr3:133091839-133110988  | 4.3445   | 4.5016   | 0.0512  | 0.566710 |
| <i>Gm7389</i>        | chr8:3994627-3997505      | 1.4520   | 1.4001   | -0.0525 | 0.799337 |

|                      |                           |           |           |         |          |
|----------------------|---------------------------|-----------|-----------|---------|----------|
| <i>Bcor1</i>         | chrX:48341357-48408049    | 1.1025    | 1.0826    | -0.0263 | 0.858452 |
| <i>Map4k2</i>        | chr19:6341134-6355615     | 77.8232   | 77.5965   | -0.0042 | 0.956657 |
| <i>Zfp931</i>        | chr2:178067694-178078476  | 6.3424    | 6.2020    | -0.0323 | 0.834786 |
| <i>Pogz</i>          | chr3:94837566-94882326    | 6.5756    | 6.8459    | 0.0581  | 0.677847 |
| <i>Atp5d</i>         | chr10:80138631-80145818   | 37.2331   | 36.7374   | -0.0193 | 0.894956 |
| <i>Arl5a</i>         | chr2:52397950-52424901    | 14.4347   | 14.9614   | 0.0517  | 0.684757 |
| <i>Ptp4a2</i>        | chr4:129811218-129850003  | 98.1051   | 97.3677   | -0.0109 | 0.907539 |
| <i>Map10</i>         | chr8:125669817-125673365  | 1.8799    | 1.9864    | 0.0795  | 0.703577 |
| <i>Shhg6</i>         | chr1:9941958-9944118      | 24.8613   | 25.8224   | 0.0547  | 0.628771 |
| <i>Cox6b1</i>        | chr7:30616973-30626151    | 187.7168  | 183.6636  | -0.0315 | 0.870105 |
| <i>A630014C17Rik</i> | chr11:52276054-52286179   | 8.0591    | 7.9512    | -0.0194 | 0.885692 |
| <i>Pole2</i>         | chr12:69201778-69228190   | 18.1410   | 17.9042   | -0.0190 | 0.867098 |
| <i>Edc3</i>          | chr9:57708539-57752499    | 14.4430   | 14.4307   | -0.0012 | 0.980566 |
| <i>Arl8a</i>         | chr1:135146823-135156269  | 7.0237    | 7.3158    | 0.0588  | 0.482025 |
| <i>Foxd2os</i>       | chr4:114909256-114921967  | 1.2817    | 1.2358    | -0.0526 | 0.746677 |
| <i>Lepre1</i>        | chr4:119232914-119248975  | 1.5186    | 1.6187    | 0.0920  | 0.709475 |
| <i>Tmem106b</i>      | chr6:13069758-13089269    | 21.9218   | 21.8610   | -0.0040 | 0.942365 |
| <i>Z310022A10Rik</i> | chr7:27553294-27582094    | 2.9089    | 2.8412    | -0.0340 | 0.862518 |
| <i>Slca3a1</i>       | chr7:74275418-74554780    | 8.1976    | 8.1256    | -0.0127 | 0.916901 |
| <i>Thrb</i>          | chr14:17660959-18038088   | 1.3436    | 1.3204    | -0.0251 | 0.827965 |
| <i>Rps6ka2</i>       | chr17:7170114-7303313     | 1.2465    | 1.3087    | 0.0703  | 0.607935 |
| <i>Atp6v1g2</i>      | chr17:35233659-35238767   | 2.6285    | 2.7826    | 0.0822  | 0.665735 |
| <i>Thap4</i>         | chr1:93705390-93754838    | 5.5450    | 5.7946    | 0.0635  | 0.567069 |
| <i>Glod4</i>         | chr11:76120986-76243725   | 11.1046   | 11.0526   | -0.0068 | 0.906837 |
| <i>Ppp1cc</i>        | chr5:122158277-122175273  | 6.7016    | 6.6108    | -0.0197 | 0.891737 |
| <i>Nfkbie</i>        | chr17:45555715-45563169   | 18.8747   | 19.5826   | 0.0531  | 0.636064 |
| <i>Trub1</i>         | chr19:57452905-57491005   | 6.5885    | 6.5635    | -0.0055 | 0.901697 |
| <i>Rrp15</i>         | chr1:186720977-186749358  | 10.0348   | 9.8923    | -0.0206 | 0.862856 |
| <i>Gm11944</i>       | chr11:3308995-3320722     | 7.1976    | 7.7547    | 0.1075  | 0.745712 |
| <i>Fbxw8</i>         | chr5:118064980-118155458  | 4.3790    | 4.5915    | 0.0684  | 0.722498 |
| <i>Slc25a18</i>      | chr6:120773767-120793982  | 3.1227    | 3.3670    | 0.1087  | 0.678796 |
| <i>Morc3</i>         | chr16:93832120-93876072   | 59.6987   | 59.2527   | -0.0108 | 0.909435 |
| <i>Rassf3</i>        | chr10:121410349-121476250 | 19.6701   | 19.5049   | -0.0122 | 0.901355 |
| <i>Trbv13-3</i>      | chr6:41130146-41130585    | 90.7898   | 89.3394   | -0.0232 | 0.860551 |
| <i>Mto1</i>          | chr9:78448207-78475348    | 10.8960   | 10.8029   | -0.0124 | 0.888647 |
| <i>Itm2b</i>         | chr14:73362230-73385271   | 318.3891  | 317.0394  | -0.0061 | 0.934805 |
| <i>Gramd1c</i>       | chr16:43980349-44027945   | 2.3461    | 2.2944    | -0.0321 | 0.680865 |
| <i>Tgjf2</i>         | chr2:156840076-156855570  | 6.2414    | 6.1895    | -0.0120 | 0.879928 |
| <i>Ubxn2a</i>        | chr12:4879031-4907705     | 15.8634   | 15.6700   | -0.0177 | 0.881246 |
| <i>Smim19</i>        | chr8:22462614-22476879    | 10.0130   | 9.8509    | -0.0235 | 0.857020 |
| <i>Pdss2</i>         | chr10:43221485-43464882   | 2.3810    | 2.4899    | 0.0645  | 0.605024 |
| <i>Timeless</i>      | chr10:128232064-128252941 | 10.9535   | 11.3360   | 0.0495  | 0.654906 |
| <i>Stat5b</i>        | chr11:100780730-100850724 | 48.4769   | 49.7973   | 0.0388  | 0.428047 |
| <i>Dcaf4</i>         | chr12:83520465-83541988   | 9.0458    | 9.4027    | 0.0558  | 0.544882 |
| <i>D930015E06Rik</i> | chr3:83898286-84040161    | 25.7874   | 26.6400   | 0.0469  | 0.633253 |
| <i>H3f3aos</i>       | chr1:180813775-180816859  | 6.1395    | 6.3964    | 0.0592  | 0.649241 |
| <i>Sf3a3</i>         | chr4:124714775-124732460  | 28.5402   | 29.4715   | 0.0463  | 0.580177 |
| <i>Ranbp10</i>       | chr8:105768307-105827350  | 18.1669   | 18.7911   | 0.0487  | 0.627493 |
| <i>Adck2</i>         | chr6:39573872-39596595    | 9.0795    | 9.4088    | 0.0514  | 0.552715 |
| <i>Gm11725</i>       | chr11:117871249-117887416 | 2.9277    | 3.0901    | 0.0779  | 0.620991 |
| <i>Ncbp2</i>         | chr16:31948512-31961781   | 12.9468   | 13.4401   | 0.0539  | 0.617879 |
| <i>Zfp110</i>        | chr7:12834760-12850577    | 37.9368   | 38.9695   | 0.0387  | 0.372125 |
| <i>Lysmd4</i>        | chr7:67222543-67228468    | 3.7131    | 3.8657    | 0.0581  | 0.518877 |
| <i>Tvp23a</i>        | chr16:10420556-10447362   | 8.9445    | 9.2735    | 0.0521  | 0.606660 |
| <i>Rb1cc1</i>        | chr1:6206196-6276648      | 16.5747   | 16.5677   | -0.0006 | 0.990067 |
| <i>Zgrf1</i>         | chr3:127553488-127618021  | 2.5767    | 2.6746    | 0.0538  | 0.502286 |
| <i>Sacm1l</i>        | chr9:123529881-123592598  | 29.1696   | 30.0314   | 0.0420  | 0.523964 |
| <i>Bag1</i>          | chr4:40936397-40948281    | 56.0068   | 55.2658   | -0.0192 | 0.882785 |
| <i>Zbp1</i>          | chr2:173206611-173218923  | 40.0703   | 41.9662   | 0.0667  | 0.764035 |
| <i>Zfp493</i>        | chr13:67779753-67792512   | 1.7553    | 1.7186    | -0.0305 | 0.802560 |
| <i>Sbds</i>          | chr5:130245730-130255530  | 38.5174   | 38.4641   | -0.0020 | 0.953609 |
| <i>Tpk1</i>          | chr6:43345000-43666278    | 1.6626    | 1.7511    | 0.0747  | 0.676096 |
| <i>Ppp2r2d</i>       | chr7:138846078-138883057  | 8.3906    | 8.6596    | 0.0455  | 0.568467 |
| <i>Snora68</i>       | chr8:70895758-70895889    | 32.6788   | 34.6704   | 0.0853  | 0.617230 |
| <i>Gm26377</i>       | chr9:78478527-78478635    | 6618.5510 | 6886.2072 | 0.0572  | 0.718583 |
| <i>Tinf2</i>         | chr14:55679082-55681817   | 33.0975   | 34.0657   | 0.0416  | 0.333258 |
| <i>Gm26724</i>       | chr17:27201031-27203071   | 7.5295    | 7.4388    | -0.0175 | 0.740832 |
| <i>Zmpste24</i>      | chr4:121059236-121098241  | 7.1811    | 7.1615    | -0.0039 | 0.922509 |
| <i>Eogt</i>          | chr6:97110023-97149182    | 6.1781    | 6.0963    | -0.0192 | 0.879758 |
| <i>Sall2</i>         | chr14:52311171-52328762   | 5.1898    | 5.3759    | 0.0508  | 0.489177 |
| <i>Ercc6l2</i>       | chr13:63815239-63900302   | 7.2994    | 7.5166    | 0.0423  | 0.398236 |

|                      |                           |          |          |         |          |
|----------------------|---------------------------|----------|----------|---------|----------|
| <i>Dars2</i>         | chr1:161040600-161070658  | 4.1940   | 4.1397   | -0.0188 | 0.857698 |
| <i>Itpr3</i>         | chr17:27057303-27122223   | 31.8879  | 32.9492  | 0.0472  | 0.630910 |
| <i>Atf6b</i>         | chr17:34647145-34655074   | 16.1354  | 16.0715  | -0.0057 | 0.938569 |
| <i>4933406118Rik</i> | chr7:114315478-114415161  | 2.4305   | 2.5750   | 0.0833  | 0.573378 |
| <i>Zfp652</i>        | chr11:95712672-95835115   | 14.9705  | 14.9375  | -0.0032 | 0.966377 |
| <i>Golm1</i>         | chr13:59634995-59675784   | 18.2281  | 17.8567  | -0.0297 | 0.889840 |
| <i>Rnf181</i>        | chr6:72359713-72362721    | 28.2692  | 28.0726  | -0.0101 | 0.900289 |
| <i>Amn1</i>          | chr6:149157146-149188712  | 4.6693   | 4.8327   | 0.0496  | 0.349463 |
| <i>Glrx3</i>         | chr7:137437647-137468594  | 9.7878   | 10.1493  | 0.0523  | 0.285651 |
| <i>Tubgcp2</i>       | chr7:139995954-140036350  | 17.1373  | 16.9883  | -0.0126 | 0.906920 |
| <i>Use1</i>          | chr8:71366847-71369732    | 52.3041  | 51.6625  | -0.0178 | 0.895110 |
| <i>Zdhhc3</i>        | chr9:123066159-123113205  | 10.3357  | 10.6103  | 0.0378  | 0.302054 |
| <i>Gmpr2</i>         | chr14:55672234-55678750   | 22.1589  | 22.9702  | 0.0519  | 0.557777 |
| <i>Em14</i>          | chr17:83350930-83480361   | 29.9487  | 30.8313  | 0.0419  | 0.566281 |
| <i>Gm6611</i>        | chr16:32923217-32924489   | 6.5429   | 6.9393   | 0.0849  | 0.716541 |
| <i>Trp53rk</i>       | chr2:166792530-166799505  | 1.8585   | 1.8237   | -0.0273 | 0.832907 |
| <i>Mettl14</i>       | chr3:123364644-123385990  | 6.2173   | 6.4304   | 0.0486  | 0.436121 |
| <i>Utp6</i>          | chr11:79932320-79962390   | 16.3634  | 16.8716  | 0.0441  | 0.584111 |
| <i>Gm15927</i>       | chr7:3632113-3644887      | 7.8147   | 7.6954   | -0.0222 | 0.865848 |
| <i>Galt</i>          | chr4:41755227-41758695    | 13.8111  | 13.7454  | -0.0069 | 0.866343 |
| <i>Vcpkmt</i>        | chr12:69577627-69583028   | 9.8226   | 9.6269   | -0.0290 | 0.818260 |
| <i>Nup93</i>         | chr8:94214596-94315066    | 13.8538  | 13.7566  | -0.0102 | 0.906947 |
| <i>2610015P09Rik</i> | chr16:43889799-43964314   | 2.6551   | 2.6144   | -0.0223 | 0.764504 |
| <i>Coro1b</i>        | chr19:4148618-4154035     | 65.2797  | 65.3011  | 0.0005  | 0.992006 |
| <i>Phf21a</i>        | chr2:92093116-92364666    | 13.2043  | 13.5998  | 0.0426  | 0.493340 |
| <i>Gm26773</i>       | chr14:118107830-118117100 | 2.8597   | 2.9991   | 0.0687  | 0.589434 |
| <i>Ifngr1</i>        | chr10:19591948-19610229   | 54.6508  | 53.8740  | -0.0207 | 0.897700 |
| <i>Riok1</i>         | chr13:38036988-38061433   | 31.7493  | 31.6463  | -0.0047 | 0.932119 |
| <i>Frmdbos</i>       | chr19:5848507-5851372     | 49.2740  | 51.2598  | 0.0570  | 0.665372 |
| <i>Cacfd1</i>        | chr2:27009925-27021089    | 3.4880   | 3.6412   | 0.0620  | 0.662255 |
| <i>Nmi</i>           | chr2:51948486-51973494    | 36.7165  | 36.2077  | -0.0201 | 0.887099 |
| <i>Cpne3</i>         | chr4:19519253-19570108    | 11.2885  | 11.6141  | 0.0410  | 0.503335 |
| <i>Ddx46</i>         | chr13:55635026-55681256   | 39.1917  | 39.2298  | 0.0014  | 0.970536 |
| <i>1700019G17Rik</i> | chr6:85899050-85904884    | 2.9388   | 2.8508   | -0.0438 | 0.848270 |
| <i>Bora</i>          | chr14:99046426-99074537   | 6.0924   | 6.3238   | 0.0538  | 0.496256 |
| <i>Dtx2</i>          | chr5:135994799-136032872  | 3.9050   | 3.8830   | -0.0082 | 0.913240 |
| <i>Atad3aos</i>      | chr4:155761177-155769264  | 2.7689   | 2.6774   | -0.0485 | 0.712062 |
| <i>Ccnb2-ps</i>      | chr8:71916555-71918851    | 4.0331   | 3.9169   | -0.0422 | 0.846024 |
| <i>Gm16214</i>       | chr9:42022614-42034113    | 5.5936   | 5.9079   | 0.0789  | 0.709328 |
| <i>Gm13571</i>       | chr2:60338187-60371234    | 5.9365   | 5.8747   | -0.0151 | 0.892705 |
| <i>Bloc1s6</i>       | chr2:122738502-122749475  | 8.4894   | 8.3813   | -0.0185 | 0.877585 |
| <i>Amigo1</i>        | chr3:108186334-108192286  | 1.5345   | 1.5062   | -0.0268 | 0.766123 |
| <i>Aqp3</i>          | chr4:41092721-41098183    | 3.1526   | 3.0310   | -0.0568 | 0.839130 |
| <i>Aftph</i>         | chr11:20685083-20741589   | 30.6156  | 31.4359  | 0.0381  | 0.485626 |
| <i>Cep63</i>         | chr9:102586577-102626534  | 6.4293   | 6.6340   | 0.0452  | 0.504079 |
| <i>Api5</i>          | chr2:94411681-94438136    | 32.5668  | 32.4692  | -0.0043 | 0.943504 |
| <i>Tbca</i>          | chr13:94788942-94842899   | 46.6940  | 45.2638  | -0.0449 | 0.858245 |
| <i>Pafah1b3</i>      | chr7:25295048-25297986    | 2.1675   | 2.3022   | 0.0870  | 0.598728 |
| <i>Fmn13</i>         | chr15:99317224-99370482   | 13.7207  | 13.7099  | -0.0011 | 0.981257 |
| <i>Smim11</i>        | chr16:92301285-92313041   | 17.4444  | 16.9700  | -0.0398 | 0.861973 |
| <i>Sh3bgrl3</i>      | chr4:134127405-134128789  | 261.2197 | 258.3428 | -0.0160 | 0.910516 |
| <i>Slc2a12</i>       | chr10:22645010-22704285   | 1.8887   | 1.9767   | 0.0657  | 0.522082 |
| <i>Sirt1</i>         | chr10:63319004-63381704   | 16.1853  | 16.1301  | -0.0049 | 0.946472 |
| <i>Asb13</i>         | chr13:3634031-3651774     | 16.0626  | 16.6334  | 0.0504  | 0.609879 |
| <i>Mxd3</i>          | chr13:55325167-55329758   | 8.4021   | 8.2877   | -0.0198 | 0.845479 |
| <i>Rbks</i>          | chr5:31624438-31697627    | 5.3705   | 5.6513   | 0.0735  | 0.674107 |
| <i>Grk4</i>          | chr5:34660378-34755305    | 1.2465   | 1.3090   | 0.0706  | 0.384461 |
| <i>Baz1b</i>         | chr5:135187263-135246129  | 35.1426  | 35.1355  | -0.0003 | 0.995874 |
| <i>Cog7</i>          | chr7:121922838-121981711  | 5.1815   | 5.1271   | -0.0152 | 0.883661 |
| <i>Maz</i>           | chr7:127022142-127026479  | 70.2495  | 70.2497  | 0.0000  | 0.999926 |
| <i>Champ1</i>        | chr8:13869640-13881639    | 11.2759  | 11.2314  | -0.0057 | 0.947377 |
| <i>Cln8</i>          | chr8:14881334-14901720    | 2.1006   | 2.0754   | -0.0174 | 0.904004 |
| <i>Cdkn2d</i>        | chr9:21288462-21291209    | 44.8069  | 46.6099  | 0.0569  | 0.711487 |
| <i>Acp5</i>          | chr9:22126730-22135746    | 85.8528  | 88.4361  | 0.0428  | 0.517781 |
| <i>Neil1</i>         | chr9:57143255-57147034    | 11.1370  | 11.6076  | 0.0597  | 0.605736 |
| <i>Taf9b</i>         | chrX:106206882-106221158  | 8.4653   | 8.7708   | 0.0511  | 0.638327 |
| <i>Man2a1</i>        | chr17:64600735-64755110   | 24.2654  | 24.9411  | 0.0396  | 0.515721 |
| <i>Cluap1</i>        | chr16:3908800-3941147     | 16.9212  | 16.8176  | -0.0089 | 0.886417 |
| <i>Klhl22</i>        | chr16:17759617-17793382   | 3.3354   | 3.3049   | -0.0133 | 0.855360 |
| <i>Tyw5</i>          | chr1:57388236-57407101    | 7.6253   | 7.5346   | -0.0173 | 0.855555 |
| <i>Snrpe</i>         | chr1:133603870-133610291  | 24.8555  | 24.3304  | -0.0308 | 0.870159 |

|                      |                           |          |          |         |          |
|----------------------|---------------------------|----------|----------|---------|----------|
| <i>Spata1</i>        | chr3:146457202-146499753  | 4.1925   | 4.3525   | 0.0540  | 0.611087 |
| <i>Prcc</i>          | chr3:87858899-87885608    | 23.1708  | 23.0376  | -0.0083 | 0.924089 |
| <i>lkzf1</i>         | chr11:11685002-11772926   | 108.6849 | 111.6474 | 0.0388  | 0.476889 |
| <i>Hexim2</i>        | chr11:103132428-103139876 | 2.3250   | 2.2650   | -0.0378 | 0.721386 |
| <i>Pat1</i>          | chr19:11912398-11945096   | 10.7418  | 11.1213  | 0.0501  | 0.588688 |
| <i>Rab32</i>         | chr10:10545010-10558233   | 1.8427   | 1.9578   | 0.0874  | 0.736799 |
| <i>Znrd1as</i>       | chr17:36958591-36965622   | 3.1722   | 3.3590   | 0.0826  | 0.713088 |
| <i>2210411M09Rik</i> | chr1:180952063-180958149  | 9.3166   | 9.8219   | 0.0762  | 0.666989 |
| <i>Zscan21</i>       | chr5:138116902-138134265  | 8.1375   | 8.0922   | -0.0080 | 0.805720 |
| <i>Acad8</i>         | chr9:26974134-26999566    | 5.6868   | 5.6156   | -0.0182 | 0.874162 |
| <i>Snapc5</i>        | chr9:64179296-64182684    | 34.3442  | 33.9090  | -0.0184 | 0.872345 |
| <i>Tmem42</i>        | chr9:123021325-123023490  | 14.8372  | 14.6194  | -0.0213 | 0.844537 |
| <i>Nadk2</i>         | chr15:9071259-9110487     | 5.6655   | 5.8745   | 0.0523  | 0.636013 |
| <i>Acin1</i>         | chr14:54642160-54686931   | 47.6882  | 49.0850  | 0.0416  | 0.561389 |
| <i>Wfikkn1</i>       | chr17:25877629-25880305   | 2.5789   | 2.5049   | -0.0420 | 0.846380 |
| <i>Gm15427</i>       | chr1:95498583-95499187    | 9.6419   | 9.3255   | -0.0481 | 0.868534 |
| <i>Riok3</i>         | chr18:12128849-12157367   | 47.7396  | 48.9943  | 0.0374  | 0.410534 |
| <i>Espn</i>          | chr4:152120330-152152371  | 3.1002   | 3.2422   | 0.0646  | 0.687385 |
| <i>Unk</i>           | chr11:116030321-116061214 | 12.7314  | 13.1464  | 0.0463  | 0.600352 |
| <i>Myh10</i>         | chr11:68691558-68816632   | 0.4552   | 0.4849   | 0.0912  | 0.672847 |
| <i>Prkra</i>         | chr2:76629897-76648015    | 2.3781   | 2.3081   | -0.0431 | 0.705663 |
| <i>Chchd5</i>        | chr2:129129699-129134134  | 7.3951   | 7.7137   | 0.0608  | 0.677732 |
| <i>Snora33</i>       | chr10:23785346-23785475   | 39.3248  | 41.4425  | 0.0757  | 0.702309 |
| <i>Gimap6</i>        | chr6:48701581-48708225    | 405.9347 | 419.6665 | 0.0480  | 0.675567 |
| <i>Capn2</i>         | chr1:182467255-182517495  | 42.2563  | 43.5719  | 0.0442  | 0.651624 |
| <i>Dhx35</i>         | chr2:158794806-158858214  | 7.7570   | 7.7201   | -0.0069 | 0.933928 |
| <i>Ypel3</i>         | chr7:126776954-126780514  | 42.9878  | 42.6941  | -0.0099 | 0.932345 |
| <i>Nudt9</i>         | chr5:104046305-104065379  | 14.6040  | 15.0674  | 0.0451  | 0.503609 |
| <i>Zfp65</i>         | chr13:67705305-67729119   | 10.1684  | 10.4912  | 0.0451  | 0.603120 |
| <i>Taf9</i>          | chr13:100651342-100656059 | 18.9384  | 18.6274  | -0.0239 | 0.866385 |
| <i>Wdr81</i>         | chr11:75440943-75454717   | 8.7470   | 9.0676   | 0.0519  | 0.686263 |
| <i>Tpi1</i>          | chr6:124810585-124814296  | 16.8620  | 17.7374  | 0.0730  | 0.812581 |
| <i>Cbx3</i>          | chr6:51470359-51483704    | 7.9420   | 8.2238   | 0.0503  | 0.533857 |
| <i>Zfp780b</i>       | chr7:27962707-27975368    | 6.0599   | 5.9840   | -0.0182 | 0.862778 |
| <i>Smim7</i>         | chr8:72565187-72571088    | 16.4627  | 16.9697  | 0.0438  | 0.577324 |
| <i>Micall1</i>       | chr15:79108971-79136897   | 16.1107  | 15.9634  | -0.0133 | 0.932693 |
| <i>Akap8l</i>        | chr17:32321424-32350581   | 71.4304  | 71.3354  | -0.0019 | 0.978693 |
| <i>Rab11a</i>        | chr9:64715298-64737758    | 17.6363  | 18.2487  | 0.0492  | 0.689221 |
| <i>Ovgp1</i>         | chr3:105973710-105987423  | 6.2154   | 6.4585   | 0.0553  | 0.660016 |
| <i>Cnksr3</i>        | chr10:7119062-7212237     | 2.5099   | 2.4625   | -0.0275 | 0.874423 |
| <i>Cdon</i>          | chr9:35421127-35507651    | 11.5338  | 11.8783  | 0.0425  | 0.568526 |
| <i>Nacad</i>         | chr11:6597822-6606053     | 5.2364   | 5.1624   | -0.0205 | 0.915199 |
| <i>Kif3c</i>         | chr12:3365131-3406494     | 6.2589   | 6.2065   | -0.0121 | 0.922271 |
| <i>Ulk1</i>          | chr5:110784487-110810097  | 4.5388   | 4.7563   | 0.0675  | 0.731903 |
| <i>Mest</i>          | chr6:30723546-30748455    | 1.3054   | 1.3880   | 0.0885  | 0.650614 |
| <i>Ccne1</i>         | chr7:38097983-38107534    | 6.5374   | 6.7939   | 0.0555  | 0.633837 |
| <i>Lcmt1</i>         | chr7:123377981-123430358  | 9.8133   | 10.2018  | 0.0560  | 0.659749 |
| <i>Tns1</i>          | chr1:73910230-74124447    | 1.0604   | 1.1173   | 0.0755  | 0.720821 |
| <i>Tmem241</i>       | chr18:11981302-12121480   | 5.3684   | 5.3155   | -0.0143 | 0.854367 |
| <i>Phf3</i>          | chr1:30802341-30863256    | 40.2344  | 41.2913  | 0.0374  | 0.447044 |
| <i>Gm26613</i>       | chr11:115615461-115626707 | 3.6533   | 3.8583   | 0.0788  | 0.599742 |
| <i>Tbl1xr1</i>       | chr3:22076651-22216594    | 31.3288  | 32.1562  | 0.0376  | 0.493870 |
| <i>Gm15872</i>       | chr1:193187374-193192011  | 16.2789  | 17.0782  | 0.0692  | 0.711097 |
| <i>Zfp932</i>        | chr5:109996520-110010411  | 5.7823   | 5.7124   | -0.0176 | 0.880124 |
| <i>Nmrk1</i>         | chr19:18631949-18652194   | 1.2490   | 1.3205   | 0.0803  | 0.620984 |
| <i>Gpsm3</i>         | chr17:34589805-34591754   | 84.6708  | 87.4662  | 0.0469  | 0.636116 |
| <i>Zfp628</i>        | chr7:4915216-4922003      | 3.5020   | 3.6822   | 0.0724  | 0.686057 |
| <i>Ercc8</i>         | chr13:108158730-108195364 | 3.4067   | 3.3812   | -0.0108 | 0.891182 |
| <i>Tmem88</i>        | chr11:69396518-69398234   | 7.8170   | 7.7015   | -0.0215 | 0.830527 |
| <i>Krit1</i>         | chr5:3803164-3844515      | 23.4111  | 23.3860  | -0.0015 | 0.979210 |
| <i>Phc2</i>          | chr4:128654701-128752881  | 8.9975   | 9.3352   | 0.0532  | 0.682790 |
| <i>Gm11574</i>       | chr11:97048690-97051432   | 12.4690  | 12.3277  | -0.0164 | 0.852425 |
| <i>Ict1os</i>        | chr11:115406585-115408314 | 5.5882   | 5.4489   | -0.0364 | 0.825915 |
| <i>Cd97</i>          | chr8:83723250-83741326    | 215.5156 | 222.4148 | 0.0455  | 0.694472 |
| <i>Traj11</i>        | chr14:54207138-54207197   | 131.9312 | 129.7236 | -0.0243 | 0.854841 |
| <i>Crocc</i>         | chr4:141016636-141060550  | 1.9093   | 1.8937   | -0.0118 | 0.889281 |
| <i>Pds5a</i>         | chr5:65615259-65697856    | 73.3644  | 75.2164  | 0.0360  | 0.408171 |
| <i>Phtf1</i>         | chr3:103968109-104024598  | 13.4688  | 13.8272  | 0.0379  | 0.475354 |
| <i>Gm11974</i>       | chr11:6525590-6528760     | 12.4566  | 12.9676  | 0.0580  | 0.681176 |
| <i>Pon2</i>          | chr6:5264146-5298455      | 12.3472  | 12.2581  | -0.0105 | 0.923346 |
| <i>Npat</i>          | chr9:53537046-53574342    | 13.2497  | 13.2377  | -0.0013 | 0.979700 |

|                      |                           |          |          |         |          |
|----------------------|---------------------------|----------|----------|---------|----------|
| <i>Sh3kbp1</i>       | chrX:159627271-159978069  | 45.7698  | 45.7143  | -0.0018 | 0.978541 |
| <i>Trim13</i>        | chr14:61598225-61605946   | 4.0791   | 4.2851   | 0.0711  | 0.700119 |
| <i>Ppt2</i>          | chr17:34616661-34628510   | 5.1325   | 5.0653   | -0.0190 | 0.901515 |
| <i>Boll</i>          | chr1:55248657-55363469    | 3.5864   | 3.4754   | -0.0454 | 0.866495 |
| <i>Dok4</i>          | chr8:94863827-94876312    | 2.7470   | 2.8738   | 0.0651  | 0.682201 |
| <i>Sirt2</i>         | chr7:28766734-28788665    | 13.8137  | 14.2645  | 0.0463  | 0.581045 |
| <i>Insf6</i>         | chr19:29321343-29325356   | 14.4140  | 14.1288  | -0.0288 | 0.836176 |
| <i>Ambra1</i>        | chr2:91730133-91918849    | 23.1223  | 23.0747  | -0.0030 | 0.974522 |
| <i>Smim4</i>         | chr14:31088868-31128930   | 18.2815  | 17.8646  | -0.0333 | 0.864545 |
| <i>Cebpz</i>         | chr17:78919005-78937070   | 34.2855  | 35.2711  | 0.0409  | 0.566991 |
| <i>Ifi30</i>         | chr8:70762773-70766663    | 24.0466  | 24.8676  | 0.0484  | 0.558660 |
| <i>Stxbp4</i>        | chr11:90476491-90638084   | 0.3859   | 0.3739   | -0.0457 | 0.821301 |
| <i>Gm21981</i>       | chr17:47686738-47694455   | 5.4264   | 5.6691   | 0.0631  | 0.670263 |
| <i>Ptpra</i>         | chr2:130450277-130554026  | 47.9849  | 47.9768  | -0.0002 | 0.996518 |
| <i>Bin1</i>          | chr18:32377216-32435736   | 52.8302  | 52.8771  | 0.0013  | 0.974319 |
| <i>Nars</i>          | chr18:64499664-64516557   | 57.5895  | 59.1667  | 0.0390  | 0.474387 |
| <i>Ahcy</i>          | chr2:155059309-155074497  | 1.5169   | 1.5966   | 0.0739  | 0.639265 |
| <i>Stx8</i>          | chr11:67966192-68207148   | 3.8783   | 3.8517   | -0.0099 | 0.883683 |
| <i>Gaa</i>           | chr11:119267886-119285454 | 5.8628   | 5.8083   | -0.0135 | 0.927140 |
| <i>Usp31</i>         | chr7:121642020-121707253  | 7.0317   | 7.0144   | -0.0036 | 0.966215 |
| <i>Lrrc29</i>        | chr8:105312340-105326276  | 3.1145   | 3.2906   | 0.0794  | 0.665437 |
| <i>Alg10b</i>        | chr15:90224310-90230554   | 13.4889  | 13.4698  | -0.0020 | 0.963063 |
| <i>Dnase1</i>        | chr16:4036941-4040024     | 5.9335   | 5.8734   | -0.0147 | 0.915433 |
| <i>Fh1</i>           | chr1:175600373-175625635  | 11.7154  | 11.6551  | -0.0074 | 0.918946 |
| <i>Gm16062</i>       | chr11:59810079-59818491   | 19.9268  | 20.6475  | 0.0513  | 0.655110 |
| <i>Eif4a1</i>        | chr11:69666935-69672423   | 30.0727  | 30.8822  | 0.0383  | 0.486134 |
| <i>Hist1h4c</i>      | chr13:23698059-23698454   | 142.8860 | 137.0784 | -0.0599 | 0.816090 |
| <i>Aggf1</i>         | chr13:95350682-95375352   | 22.2475  | 22.8281  | 0.0372  | 0.337641 |
| <i>Gtf2h2</i>        | chr13:100460217-100492579 | 5.8988   | 6.0808   | 0.0439  | 0.470305 |
| <i>Letm1</i>         | chr5:33739672-33782817    | 8.9754   | 8.9496   | -0.0042 | 0.963816 |
| <i>Ddx51</i>         | chr5:110653450-110660496  | 5.1818   | 5.1415   | -0.0112 | 0.930535 |
| <i>Crbn</i>          | chr6:106778248-106800074  | 51.5913  | 51.3201  | -0.0076 | 0.938348 |
| <i>Rrm1</i>          | chr7:102441694-102469771  | 11.7628  | 12.1645  | 0.0484  | 0.709906 |
| <i>Emd</i>           | chrX:74254686-74261548    | 16.3072  | 16.8923  | 0.0509  | 0.682042 |
| <i>Parg</i>          | chr14:32201948-32297550   | 25.9026  | 25.9113  | 0.0005  | 0.991689 |
| <i>Smpd4</i>         | chr16:17619353-17644828   | 5.5510   | 5.5216   | -0.0077 | 0.940079 |
| <i>Sfr1</i>          | chr19:47731755-47735588   | 53.9833  | 53.4074  | -0.0155 | 0.912366 |
| <i>Dars</i>          | chr1:128363707-128417416  | 54.2473  | 54.0975  | -0.0040 | 0.954768 |
| <i>Gm22357</i>       | chr1:161036056-161036139  | 351.7580 | 349.1657 | -0.0107 | 0.883497 |
| <i>Tmco1</i>         | chr1:167308669-167333978  | 8.2574   | 8.5325   | 0.0473  | 0.642755 |
| <i>Eid1</i>          | chr2:125673099-125675638  | 25.6517  | 25.4482  | -0.0115 | 0.915052 |
| <i>Thoc5</i>         | chr11:4895319-4928867     | 22.1496  | 22.8547  | 0.0452  | 0.606075 |
| <i>Bub1b</i>         | chr2:118598210-118641591  | 2.8537   | 2.7650   | -0.0455 | 0.883378 |
| <i>Traj12</i>        | chr14:54206552-54206610   | 188.2437 | 198.2277 | 0.0746  | 0.731037 |
| <i>Kctd4</i>         | chr14:75955002-75965217   | 1.4719   | 1.5661   | 0.0895  | 0.735681 |
| <i>Strn</i>          | chr17:78649912-78737196   | 16.5837  | 16.6231  | 0.0034  | 0.927097 |
| <i>Canx</i>          | chr11:50293960-50325673   | 79.8868  | 79.8631  | -0.0004 | 0.994170 |
| <i>Unc119</i>        | chr11:78343481-78349164   | 3.7868   | 3.9585   | 0.0640  | 0.705362 |
| <i>Dyrk1b</i>        | chr7:28179468-28187294    | 3.5947   | 3.5575   | -0.0150 | 0.878256 |
| <i>Scamp2</i>        | chr9:57560943-57588797    | 27.6107  | 27.6001  | -0.0006 | 0.992694 |
| <i>9930014A18Rik</i> | chr15:60822964-60831793   | 2.2321   | 2.3306   | 0.0623  | 0.605394 |
| <i>Paxbp1</i>        | chr16:91014036-91044543   | 36.7935  | 36.8547  | 0.0024  | 0.956754 |
| <i>A130010J15Rik</i> | chr1:193168048-193177832  | 23.1609  | 23.8144  | 0.0401  | 0.566325 |
| <i>Gabpb1</i>        | chr2:126627441-126676337  | 9.3991   | 9.4090   | 0.0015  | 0.967035 |
| <i>Mdn1</i>          | chr4:32657118-32775217    | 27.4031  | 28.3279  | 0.0479  | 0.694515 |
| <i>Tspan13</i>       | chr12:36014556-36042500   | 42.7620  | 42.3365  | -0.0144 | 0.916511 |
| <i>Cebpg</i>         | chr7:35046421-35056503    | 15.7133  | 16.1596  | 0.0404  | 0.535653 |
| <i>Serhl</i>         | chr15:83089505-83116674   | 3.8384   | 3.9664   | 0.0473  | 0.645638 |
| <i>Pias2</i>         | chr18:77065207-77155708   | 15.5965  | 16.0231  | 0.0389  | 0.454817 |
| <i>Epg5</i>          | chr18:77938466-78035027   | 13.7881  | 13.7991  | 0.0012  | 0.986197 |
| <i>Nasp</i>          | chr4:116601051-116627941  | 10.9498  | 10.8823  | -0.0089 | 0.931000 |
| <i>Nup85</i>         | chr11:115564433-115583985 | 20.3795  | 20.3675  | -0.0008 | 0.981349 |
| <i>Hook2</i>         | chr8:84990594-85003364    | 2.3201   | 2.4406   | 0.0730  | 0.717798 |
| <i>Syap1</i>         | chrX:162857056-162888447  | 18.4833  | 19.0588  | 0.0442  | 0.609591 |
| <i>Ripk3</i>         | chr14:55784995-55788857   | 17.9827  | 17.9198  | -0.0051 | 0.927843 |
| <i>Gm15879</i>       | chr16:4032838-4037847     | 4.7276   | 4.6012   | -0.0391 | 0.832801 |
| <i>4632404H12Rik</i> | chr3:89767510-89773240    | 7.8501   | 8.1131   | 0.0475  | 0.520877 |
| <i>Hps5</i>          | chr7:46760465-46796064    | 12.7110  | 13.0776  | 0.0410  | 0.519162 |
| <i>Mfhas1</i>        | chr8:35587797-35679449    | 14.6486  | 14.6313  | -0.0017 | 0.984122 |
| <i>Pnp</i>           | chr14:50944301-50965237   | 6.4966   | 6.4272   | -0.0155 | 0.882351 |
| <i>Polq</i>          | chr16:37011785-37095417   | 1.5933   | 1.6600   | 0.0591  | 0.699347 |



|                      |                           |          |          |         |          |
|----------------------|---------------------------|----------|----------|---------|----------|
| <i>Ccnt2</i>         | chr1:127774163-127808061  | 18.2148  | 18.2249  | 0.0008  | 0.990601 |
| <i>Asap2</i>         | chr12:21111747-21270171   | 2.3740   | 2.4708   | 0.0577  | 0.648477 |
| <i>Mblac2</i>        | chr13:81711416-81753275   | 3.8929   | 3.8429   | -0.0186 | 0.867765 |
| <i>Slc35f6</i>       | chr5:30647932-30659731    | 9.4214   | 9.3296   | -0.0141 | 0.909887 |
| <i>Nagk</i>          | chr6:83794981-83803420    | 4.8790   | 5.0481   | 0.0492  | 0.308217 |
| <i>Gpr19</i>         | chr6:134869092-134897925  | 3.2338   | 3.3797   | 0.0637  | 0.718679 |
| <i>Isoc2a</i>        | chr7:4877052-4895717      | 10.3245  | 10.7783  | 0.0621  | 0.672367 |
| <i>Zranb1</i>        | chr7:132931141-132986391  | 22.2482  | 22.2303  | -0.0012 | 0.984858 |
| <i>Vps37a</i>        | chr8:40511782-40551134    | 14.2287  | 14.2108  | -0.0018 | 0.977679 |
| <i>Coq9</i>          | chr8:94838320-94854895    | 12.4559  | 12.4241  | -0.0037 | 0.944476 |
| <i>Hsf1</i>          | chr15:76477444-76500972   | 24.4503  | 24.4106  | -0.0023 | 0.977573 |
| <i>Ube2e1</i>        | chr14:18282721-18331859   | 5.8007   | 5.7518   | -0.0122 | 0.899953 |
| <i>Sacs</i>          | chr14:61138456-61240695   | 17.6076  | 17.5904  | -0.0014 | 0.985840 |
| <i>Slc25a37</i>      | chr14:69241850-69285103   | 8.0842   | 8.0680   | -0.0029 | 0.960644 |
| <i>Gm13546</i>       | chr2:58164000-58177063    | 8.0982   | 8.4548   | 0.0622  | 0.728914 |
| <i>S100a13</i>       | chr3:90514434-90524581    | 42.9579  | 41.9417  | -0.0345 | 0.882772 |
| <i>Hist2h4</i>       | chr3:96261703-96263311    | 34.7092  | 33.3799  | -0.0563 | 0.832554 |
| <i>Sigmar1</i>       | chr4:41738492-41756157    | 8.5306   | 8.8176   | 0.0477  | 0.555365 |
| <i>Rps7</i>          | chr12:28630846-28635953   | 11.0081  | 10.8443  | -0.0216 | 0.876493 |
| <i>Gcsh</i>          | chr8:116981809-116993537  | 4.9974   | 4.9150   | -0.0240 | 0.802265 |
| <i>Cox7a2</i>        | chr9:79755240-79759853    | 63.0256  | 62.1119  | -0.0211 | 0.903414 |
| <i>Arl13b</i>        | chr16:62793684-62847040   | 4.1763   | 4.3126   | 0.0463  | 0.546921 |
| <i>Gm20538</i>       | chr19:44543721-44552831   | 47.8222  | 47.2662  | -0.0169 | 0.858332 |
| <i>Tmed5</i>         | chr5:108106365-108132620  | 13.1470  | 13.5689  | 0.0456  | 0.704550 |
| <i>Phf14</i>         | chr6:11907808-12081197    | 21.7991  | 22.3458  | 0.0357  | 0.370908 |
| <i>C2cd5</i>         | chr6:143010919-143100107  | 17.7879  | 18.2959  | 0.0406  | 0.563517 |
| <i>Tmc3</i>          | chr7:83584926-83625614    | 1.6119   | 1.6767   | 0.0569  | 0.629747 |
| <i>Pcyt1a</i>        | chr16:32430920-32475070   | 4.4209   | 4.3980   | -0.0075 | 0.907332 |
| <i>Cox17</i>         | chr16:38346990-38352763   | 8.9511   | 9.2100   | 0.0411  | 0.571094 |
| <i>Lin9</i>          | chr1:180641149-180690518  | 7.8373   | 8.0834   | 0.0446  | 0.549220 |
| <i>Snap23</i>        | chr2:120567670-120601255  | 8.1275   | 8.0599   | -0.0120 | 0.906429 |
| <i>1110032F04Rik</i> | chr3:68869585-68872163    | 5.8035   | 6.0521   | 0.0605  | 0.749232 |
| <i>Skp1a</i>         | chr11:52231994-52246858   | 70.3850  | 69.5246  | -0.0177 | 0.916149 |
| <i>Ftsj2</i>         | chr5:140327673-140331898  | 5.8498   | 5.7558   | -0.0234 | 0.852439 |
| <i>Opa3</i>          | chr7:19228333-19256543    | 8.0919   | 8.0759   | -0.0029 | 0.971560 |
| <i>Polr2l</i>        | chr7:141471859-141475132  | 4.0825   | 4.0065   | -0.0271 | 0.861348 |
| <i>Foxred2</i>       | chr15:77940521-77956722   | 2.3871   | 2.3548   | -0.0197 | 0.892047 |
| <i>Capn7</i>         | chr14:31336637-31371986   | 38.1764  | 38.1022  | -0.0028 | 0.972338 |
| <i>5830428H23Rik</i> | chr19:61053839-61140840   | 10.9218  | 11.2214  | 0.0390  | 0.373902 |
| <i>Gm15675</i>       | chr1:130429780-130437191  | 7.7764   | 8.1096   | 0.0605  | 0.765840 |
| <i>Gm12966</i>       | chr4:129899092-129899902  | 15.2588  | 15.8648  | 0.0562  | 0.637729 |
| <i>Myeov2</i>        | chr1:92637144-92641985    | 17.3834  | 18.0200  | 0.0519  | 0.689021 |
| <i>Drg1</i>          | chr11:3187359-3266415     | 24.0680  | 23.9409  | -0.0076 | 0.935944 |
| <i>Snora73b</i>      | chr4:132352321-132352526  | 923.1238 | 879.9721 | -0.0691 | 0.825778 |
| <i>Med29</i>         | chr7:28386145-28392708    | 3.9813   | 4.1841   | 0.0717  | 0.590672 |
| <i>Eif1b</i>         | chr9:120492605-120495327  | 45.5554  | 45.0284  | -0.0168 | 0.907693 |
| <i>Mre11a</i>        | chr9:14784653-14837123    | 12.0393  | 12.3672  | 0.0388  | 0.464363 |
| <i>Uhmk1</i>         | chr1:170193419-170215397  | 33.6479  | 34.4762  | 0.0351  | 0.418526 |
| <i>Acot13</i>        | chr13:24817947-24831517   | 22.3888  | 23.2782  | 0.0562  | 0.691484 |
| <i>Gm17690</i>       | chr3:96167463-96172414    | 5.3625   | 5.3022   | -0.0163 | 0.889425 |
| <i>Klhl3</i>         | chr13:58004220-58113592   | 4.5594   | 4.5327   | -0.0085 | 0.905927 |
| <i>C1qbp</i>         | chr11:70977835-70983026   | 12.1953  | 12.6012  | 0.0472  | 0.579991 |
| <i>Commd9</i>        | chr2:101886246-101901646  | 6.4445   | 6.3717   | -0.0164 | 0.761035 |
| <i>Tmed3</i>         | chr9:89699202-89705043    | 15.1759  | 15.7200  | 0.0508  | 0.690810 |
| <i>Socs5</i>         | chr17:87107678-87137583   | 4.1674   | 4.3179   | 0.0512  | 0.629733 |
| <i>Ncor1</i>         | chr11:62316425-62458541   | 49.8931  | 51.2482  | 0.0387  | 0.566284 |
| <i>Elmsan1</i>       | chr12:84149175-84218881   | 11.2829  | 11.2215  | -0.0079 | 0.955672 |
| <i>Zfp260</i>        | chr7:30094776-30107622    | 27.4154  | 28.1772  | 0.0395  | 0.612408 |
| <i>Ebp</i>           | chrX:8185328-8193512      | 17.6199  | 17.5161  | -0.0085 | 0.922358 |
| <i>Ddx59</i>         | chr1:136415270-136440158  | 7.2476   | 7.4854   | 0.0466  | 0.569631 |
| <i>Ccnc</i>          | chr4:21727700-21759922    | 9.1059   | 9.0162   | -0.0143 | 0.916329 |
| <i>Plin2</i>         | chr4:86648385-86670060    | 2.9881   | 2.9430   | -0.0220 | 0.899025 |
| <i>NA</i>            | chr18:36671159-36679366   | 23.0766  | 23.8059  | 0.0449  | 0.616211 |
| <i>Jak3</i>          | chr8:71676295-71690575    | 31.0572  | 32.4346  | 0.0626  | 0.784326 |
| <i>Zcchc24</i>       | chr14:25711639-25768856   | 1.2627   | 1.3270   | 0.0717  | 0.609024 |
| <i>Gm25117</i>       | chr10:111481492-111481636 | 41.7595  | 44.2777  | 0.0845  | 0.803908 |
| <i>Irf1</i>          | chr11:53770013-53778374   | 128.4174 | 132.4912 | 0.0451  | 0.674938 |
| <i>Zfp429</i>        | chr13:67389308-67399767   | 12.5469  | 12.9229  | 0.0426  | 0.438559 |
| <i>Rpl21</i>         | chr5:146832889-146837032  | 8.9538   | 8.9205   | -0.0054 | 0.924952 |
| <i>Trappc4</i>       | chr9:44403760-44407548    | 29.7227  | 29.5287  | -0.0094 | 0.915872 |
| <i>Pibf1</i>         | chr14:99099432-99254493   | 9.6037   | 9.9047   | 0.0445  | 0.569900 |

|                      |                           |          |          |         |          |
|----------------------|---------------------------|----------|----------|---------|----------|
| <i>Rprd1b</i>        | chr2:158028496-158132297  | 6.5586   | 6.5554   | -0.0007 | 0.989114 |
| <i>2810455O05Rik</i> | chr8:123838552-123840785  | 3.5429   | 3.7315   | 0.0748  | 0.633714 |
| <i>Slc30a7</i>       | chr3:115938972-116007406  | 15.4256  | 15.8496  | 0.0391  | 0.569763 |
| <i>Cisd1</i>         | chr10:71330479-71344954   | 5.7355   | 6.0456   | 0.0760  | 0.719411 |
| <i>Irgm2</i>         | chr11:58199617-58222779   | 45.3890  | 46.7598  | 0.0429  | 0.656504 |
| <i>Map2k4</i>        | chr11:65688242-65788297   | 10.8240  | 11.1488  | 0.0427  | 0.611851 |
| <i>Isoc2b</i>        | chr7:4844958-4866193      | 5.5158   | 5.7716   | 0.0654  | 0.717490 |
| <i>Upf3a</i>         | chr8:13785614-13798538    | 20.8215  | 20.6576  | -0.0114 | 0.916886 |
| <i>Csgalnact1</i>    | chr8:68356780-68735146    | 0.9173   | 0.8979   | -0.0308 | 0.839636 |
| <i>Atp5g1</i>        | chr11:96068851-96075670   | 1.4354   | 1.4056   | -0.0302 | 0.841887 |
| <i>Gm17036</i>       | chr18:6213912-6227324     | 34.8398  | 36.2250  | 0.0562  | 0.674752 |
| <i>8030462N17Rik</i> | chr18:77633280-77714010   | 17.2170  | 17.1850  | -0.0027 | 0.962636 |
| <i>Bola3</i>         | chr6:83349146-83360136    | 5.2640   | 5.4628   | 0.0535  | 0.698302 |
| <i>Mcat</i>          | chr15:83546796-83555711   | 10.8139  | 10.6968  | -0.0157 | 0.909123 |
| <i>Tuba1b</i>        | chr15:98931424-98934565   | 4.3525   | 4.2739   | -0.0263 | 0.897406 |
| <i>Grasp</i>         | chr15:101224206-101232755 | 2.8208   | 2.9639   | 0.0714  | 0.717630 |
| <i>Slc35b3</i>       | chr13:38932139-38960875   | 29.8941  | 29.8636  | -0.0015 | 0.981155 |
| <i>Stk3</i>          | chr15:34875495-35155806   | 3.2210   | 3.1809   | -0.0181 | 0.863476 |
| <i>1110004E09Rik</i> | chr16:90925808-90934927   | 8.8040   | 9.1617   | 0.0575  | 0.667286 |
| <i>Ramp2</i>         | chr11:101246027-101259546 | 10.0205  | 10.3376  | 0.0449  | 0.563015 |
| <i>Whamm</i>         | chr7:81571291-81596836    | 13.4919  | 13.9217  | 0.0452  | 0.605335 |
| <i>Slc37a2</i>       | chr9:37229148-37255738    | 2.1856   | 2.2965   | 0.0713  | 0.800822 |
| <i>B930036N10Rik</i> | chr1:171500567-171504111  | 2.6977   | 2.8371   | 0.0727  | 0.804631 |
| <i>Ift81</i>         | chr5:122550203-122614518  | 1.2297   | 1.2908   | 0.0699  | 0.666394 |
| <i>Cd6</i>           | chr19:10789340-10830058   | 135.7403 | 135.2676 | -0.0050 | 0.965759 |
| <i>Irgb1bp1</i>      | chr12:21240824-21286237   | 12.0385  | 11.9232  | -0.0139 | 0.916106 |
| <i>Gtpbp4</i>        | chr13:8972070-8996017     | 37.8501  | 37.7655  | -0.0032 | 0.966353 |
| <i>Gm20939</i>       | chr17:94873985-94877497   | 3.9164   | 4.0883   | 0.0619  | 0.674303 |
| <i>Ncf4</i>          | chr15:78244800-78262580   | 18.3650  | 18.9812  | 0.0476  | 0.720979 |
| <i>Tm9sf1</i>        | chr14:55635964-55643806   | 15.7195  | 15.7243  | 0.0004  | 0.993395 |
| <i>Emc7</i>          | chr2:112454996-112472162  | 9.4902   | 9.4466   | -0.0066 | 0.942258 |
| <i>Top3a</i>         | chr11:60740057-60777365   | 8.8817   | 9.1372   | 0.0409  | 0.426730 |
| <i>Cdkl3</i>         | chr11:52004220-52089784   | 1.9055   | 1.8823   | -0.0177 | 0.819015 |
| <i>Mir3064</i>       | chr11:106782692-106782759 | 437.9982 | 453.4482 | 0.0500  | 0.705145 |
| <i>Cln5</i>          | chrX:7153809-7319358      | 0.8563   | 0.8477   | -0.0145 | 0.856842 |
| <i>Rnpep</i>         | chr1:135262711-135284084  | 10.0581  | 10.0227  | -0.0051 | 0.953102 |
| <i>Itdg6</i>         | chr2:71745615-71858416    | 38.3175  | 39.4263  | 0.0412  | 0.679216 |
| <i>Il6ra</i>         | chr3:89869323-89913162    | 75.6538  | 75.6949  | 0.0008  | 0.992278 |
| <i>Tnfrsf25</i>      | chr4:152115933-152120119  | 32.5089  | 33.6421  | 0.0494  | 0.752459 |
| <i>Ttc38</i>         | chr15:85832305-85858822   | 14.6385  | 14.6531  | 0.0014  | 0.954652 |
| <i>Plekhh1</i>       | chr12:79029162-79081648   | 2.3051   | 2.3904   | 0.0524  | 0.680449 |
| <i>Gnpnat1</i>       | chr14:45376333-45388802   | 6.5593   | 6.5017   | -0.0127 | 0.878870 |
| <i>Tmem167</i>       | chr13:90089122-90143907   | 8.9682   | 9.1984   | 0.0366  | 0.522621 |
| <i>Gimap7</i>        | chr6:48718620-48724636    | 76.1432  | 79.2934  | 0.0585  | 0.785681 |
| <i>Pgap2</i>         | chr7:102210207-102238567  | 6.1364   | 6.3337   | 0.0457  | 0.542961 |
| <i>Ap2b1</i>         | chr11:83299023-83405035   | 23.4709  | 24.0762  | 0.0367  | 0.465804 |
| <i>Stk38l</i>        | chr6:146724994-146778812  | 2.9734   | 3.0955   | 0.0581  | 0.641559 |
| <i>H2-T23</i>        | chr17:36029772-36032855   | 108.3185 | 107.8543 | -0.0062 | 0.960300 |
| <i>Rasgrp2</i>       | chr19:6399339-6415216     | 34.0165  | 33.9530  | -0.0027 | 0.978822 |
| <i>Srr</i>           | chr11:74906358-74925948   | 12.4111  | 12.7654  | 0.0406  | 0.497752 |
| <i>Tle3</i>          | chr9:61372365-61418497    | 20.9300  | 20.9096  | -0.0014 | 0.989171 |
| <i>Vegfb</i>         | chr19:6982472-6987651     | 3.2894   | 3.4339   | 0.0620  | 0.468362 |
| <i>Immp1l</i>        | chr2:105904637-105965558  | 11.1138  | 10.8846  | -0.0301 | 0.887145 |
| <i>Sirt3</i>         | chr7:140863669-140882309  | 4.4406   | 4.6578   | 0.0689  | 0.639784 |
| <i>Atg5</i>          | chr10:44268357-44364291   | 18.2426  | 18.0951  | -0.0117 | 0.928147 |
| <i>A630072L19Rik</i> | chr12:100941741-100949875 | 11.2555  | 11.5958  | 0.0430  | 0.599394 |
| <i>Dtnbp1</i>        | chr13:44922078-45002096   | 12.1226  | 12.5532  | 0.0504  | 0.669587 |
| <i>Thoc7</i>         | chr14:13949013-13961225   | 45.7244  | 47.2484  | 0.0473  | 0.709179 |
| <i>Exosc1</i>        | chr19:41922979-41933314   | 18.6289  | 18.5070  | -0.0095 | 0.928539 |
| <i>Ppwd1</i>         | chr13:104205120-104228844 | 11.6287  | 11.9996  | 0.0453  | 0.568948 |
| <i>Cstb</i>          | chr10:78425669-78427619   | 26.2018  | 25.8275  | -0.0208 | 0.888675 |
| <i>Rybp</i>          | chr6:100228565-100287441  | 3.8252   | 3.9629   | 0.0510  | 0.612461 |
| <i>Ptk2</i>          | chr15:73205104-73423191   | 1.2095   | 1.1678   | -0.0507 | 0.877537 |
| <i>2700060E02Rik</i> | chr14:19811401-19823823   | 31.7699  | 31.3759  | -0.0180 | 0.915199 |
| <i>Nubp1</i>         | chr16:10411947-10424428   | 18.5300  | 18.5325  | 0.0002  | 0.997021 |
| <i>Nhlrc3</i>        | chr3:53448587-53463323    | 6.9983   | 7.1959   | 0.0402  | 0.487560 |
| <i>1810058I24Rik</i> | chr6:35252653-35263496    | 5.0235   | 5.2048   | 0.0511  | 0.582063 |
| <i>Plk-ps1</i>       | chr5:35554183-35555971    | 2.5055   | 2.4553   | -0.0292 | 0.812559 |
| <i>Mphosph8</i>      | chr14:56668247-56697430   | 14.8166  | 15.2636  | 0.0429  | 0.667318 |
| <i>Pgam2</i>         | chr11:5801639-5803733     | 7.4400   | 7.3304   | -0.0214 | 0.884280 |
| <i>Kif16b</i>        | chr2:142617473-142901531  | 10.6757  | 10.6768  | 0.0001  | 0.998453 |

|                      |                           |          |          |         |          |
|----------------------|---------------------------|----------|----------|---------|----------|
| <i>Fkbp1a</i>        | chr2:151542482-151561692  | 14.3909  | 14.3416  | -0.0049 | 0.967572 |
| <i>Siva1</i>         | chr12:112644827-112649152 | 6.0908   | 5.9193   | -0.0412 | 0.831244 |
| <i>Lrrc40</i>        | chr3:158036661-158068478  | 6.6973   | 6.6571   | -0.0087 | 0.931707 |
| <i>Rbmx</i>          | chrX:57383529-57393036    | 45.6699  | 45.6578  | -0.0004 | 0.995915 |
| <i>Ltv1</i>          | chr10:13178639-13193137   | 28.1439  | 28.0247  | -0.0061 | 0.947746 |
| <i>Fam26f</i>        | chr10:34126068-34127972   | 11.9029  | 12.3182  | 0.0495  | 0.678052 |
| <i>Ipmk</i>          | chr10:71347762-71433327   | 4.4338   | 4.5728   | 0.0445  | 0.645993 |
| <i>Myo1g</i>         | chr11:6506547-6520965     | 49.5455  | 49.6254  | 0.0023  | 0.973128 |
| <i>Ahsa2</i>         | chr11:23487881-23498030   | 21.9220  | 21.9101  | -0.0008 | 0.992727 |
| <i>Gm11723</i>       | chr11:117783325-117785055 | 19.2674  | 18.9750  | -0.0221 | 0.913239 |
| <i>Med6</i>          | chr12:81573556-81595008   | 15.2801  | 15.1847  | -0.0090 | 0.895889 |
| <i>Hist1h4j</i>      | chr13:21735061-21735837   | 11.8699  | 11.4258  | -0.0550 | 0.878866 |
| <i>Ctla2a</i>        | chr13:60934154-60936625   | 3.6745   | 3.8544   | 0.0690  | 0.796369 |
| <i>Fam169a</i>       | chr13:97067286-97129521   | 1.1380   | 1.1923   | 0.0671  | 0.635195 |
| <i>Smim20</i>        | chr5:53267105-53283510    | 4.3661   | 4.5043   | 0.0450  | 0.695410 |
| <i>Gm15708</i>       | chr5:144277060-144280513  | 23.8216  | 24.6751  | 0.0508  | 0.746117 |
| <i>Lrmp</i>          | chr6:145115652-145174934  | 26.0319  | 26.8146  | 0.0427  | 0.726769 |
| <i>Nosip</i>         | chr7:45062428-45078503    | 14.9164  | 14.8711  | -0.0044 | 0.958041 |
| <i>Pagr1b</i>        | chr7:127001479-127016484  | 46.6245  | 46.4609  | -0.0051 | 0.947868 |
| <i>Ash2l</i>         | chr8:25816190-25847694    | 16.9062  | 16.9076  | 0.0001  | 0.998176 |
| <i>Inpp4b</i>        | chr8:81342555-82125036    | 96.1068  | 98.3511  | 0.0333  | 0.511735 |
| <i>Ap1g1</i>         | chr8:109778553-109861358  | 19.4391  | 19.4799  | 0.0030  | 0.955095 |
| <i>Commd4</i>        | chr9:57155040-57158299    | 47.6580  | 47.5547  | -0.0031 | 0.963862 |
| <i>Zbtb38</i>        | chr9:96682762-96752831    | 9.6131   | 9.8784   | 0.0393  | 0.655759 |
| <i>Amigo3</i>        | chr9:108053158-108055701  | 5.7986   | 6.0543   | 0.0623  | 0.720614 |
| <i>Cul4b</i>         | chrX:38533273-38576196    | 18.7954  | 19.3031  | 0.0385  | 0.591292 |
| <i>Tsr2</i>          | chrX:151087093-151096543  | 7.1580   | 7.3584   | 0.0398  | 0.369395 |
| <i>Fancb</i>         | chrX:164980591-164997272  | 2.4346   | 2.3892   | -0.0272 | 0.829759 |
| <i>Z610037D02Rik</i> | chr15:96134818-96283608   | 1.2184   | 1.1964   | -0.0263 | 0.811639 |
| <i>R3hcc1</i>        | chr14:69697306-69707584   | 7.9095   | 7.8490   | -0.0111 | 0.927737 |
| <i>Ubxn6</i>         | chr17:56067044-56075028   | 12.8422  | 12.8477  | 0.0006  | 0.989651 |
| <i>Btrc</i>          | chr19:45363733-45533341   | 3.3740   | 3.4881   | 0.0480  | 0.596492 |
| <i>Map4k4</i>        | chr1:39900912-40026310    | 65.9705  | 66.1654  | 0.0043  | 0.943366 |
| <i>Ankrd44</i>       | chr1:54645339-54926387    | 42.5679  | 42.7185  | 0.0051  | 0.920337 |
| <i>Ube2f</i>         | chr1:91250310-91288877    | 6.1710   | 6.3676   | 0.0452  | 0.619562 |
| <i>Z310035C23Rik</i> | chr1:105663860-105755131  | 27.5587  | 27.6624  | 0.0054  | 0.875425 |
| <i>Ier3ip1</i>       | chr18:76930016-76941605   | 20.3010  | 21.0944  | 0.0553  | 0.768328 |
| <i>Epc2</i>          | chr2:49451485-49551948    | 29.6606  | 30.3680  | 0.0340  | 0.436656 |
| <i>Snapin</i>        | chr3:90488025-90491033    | 29.5452  | 30.4126  | 0.0417  | 0.684021 |
| <i>Trmt10b</i>       | chr4:45297126-45316131    | 6.9980   | 7.2343   | 0.0479  | 0.720282 |
| <i>Hsd1l2</i>        | chr4:59581562-59618689    | 13.9034  | 14.3276  | 0.0434  | 0.670493 |
| <i>Tmem59</i>        | chr4:107178398-107200996  | 48.4188  | 48.4853  | 0.0020  | 0.962441 |
| <i>Sesn2</i>         | chr4:132492031-132510501  | 1.8858   | 1.9800   | 0.0703  | 0.734096 |
| <i>Cdc42</i>         | chr4:137319695-137357720  | 194.4110 | 193.3866 | -0.0076 | 0.949776 |
| <i>Tmem201</i>       | chr4:149715374-149738044  | 3.2258   | 3.3510   | 0.0549  | 0.736942 |
| <i>Aurkaip1</i>      | chr4:155831271-155833130  | 34.4771  | 35.4585  | 0.0405  | 0.647062 |
| <i>Acap3</i>         | chr4:155891821-155907251  | 7.4277   | 7.4171   | -0.0021 | 0.982211 |
| <i>Taf1d</i>         | chr9:15306213-15312104    | 55.0628  | 56.6308  | 0.0405  | 0.682434 |
| <i>S100pbbp</i>      | chr4:129148004-129189727  | 9.8964   | 10.1608  | 0.0380  | 0.593411 |
| <i>Z493052L14Rik</i> | chr5:109735989-109751886  | 6.3634   | 6.5680   | 0.0457  | 0.582288 |
| <i>Ankrd26</i>       | chr6:118502563-118562256  | 6.9981   | 6.9793   | -0.0039 | 0.965453 |
| <i>Arfp1</i>         | chr3:84496092-85887516    | 19.2761  | 19.2179  | -0.0044 | 0.959730 |
| <i>Ube2g2</i>        | chr10:77622274-77645993   | 16.2198  | 16.1927  | -0.0024 | 0.963101 |
| <i>Arl1</i>          | chr10:88730857-88744094   | 11.5365  | 11.9242  | 0.0477  | 0.752070 |
| <i>Ap5z1</i>         | chr5:142463930-142478715  | 9.1722   | 9.1470   | -0.0040 | 0.973522 |
| <i>Nkap</i>          | chrX:37126794-37150746    | 10.4125  | 10.3416  | -0.0099 | 0.929862 |
| <i>Z530082P21Rik</i> | chr17:23743233-23754065   | 2.8649   | 2.8377   | -0.0137 | 0.926676 |
| <i>Ube2z</i>         | chr11:96047431-96065388   | 22.9229  | 22.9223  | 0.0000  | 0.999616 |
| <i>Sntb2</i>         | chr8:106935749-107014192  | 4.9341   | 4.8885   | -0.0134 | 0.932900 |
| <i>Zfp830</i>        | chr11:82764344-82767622   | 14.9149  | 14.8905  | -0.0024 | 0.972399 |
| <i>Nptxr</i>         | chr15:79786351-79834333   | 1.3496   | 1.3323   | -0.0187 | 0.905486 |
| <i>Rassf2</i>        | chr2:131989414-132030258  | 33.2065  | 33.2955  | 0.0039  | 0.943972 |
| <i>Ccdc12</i>        | chr9:110656502-110711590  | 30.3392  | 30.2229  | -0.0055 | 0.938520 |
| <i>Zyx</i>           | chr6:42349827-42360146    | 14.0890  | 14.6137  | 0.0528  | 0.752606 |
| <i>E2f4</i>          | chr8:105297662-105305369  | 22.5759  | 23.2923  | 0.0451  | 0.632664 |
| <i>Vamp7-ps</i>      | chr2:174046618-174047273  | 8.3111   | 8.6937   | 0.0649  | 0.758513 |
| <i>Nanos1</i>        | chr19:60755986-60759913   | 6.9230   | 6.8572   | -0.0138 | 0.934054 |
| <i>Acbd5</i>         | chr2:23068167-23114510    | 16.0966  | 16.5356  | 0.0388  | 0.648842 |
| <i>Snora23</i>       | chr7:110046363-110046547  | 106.3212 | 101.1451 | -0.0720 | 0.851967 |
| <i>Prcp</i>          | chr7:92875252-92934573    | 4.5736   | 4.7494   | 0.0544  | 0.752975 |
| <i>Ap3s1</i>         | chr18:46741916-46790826   | 6.1955   | 6.0619   | -0.0315 | 0.885276 |

|                      |                           |          |          |         |          |
|----------------------|---------------------------|----------|----------|---------|----------|
| <i>Timm17a</i>       | chr1:135301531-135313778  | 14.6756  | 15.1592  | 0.0468  | 0.689431 |
| <i>Atxn2</i>         | chr5:121711336-121816493  | 4.9835   | 5.1600   | 0.0502  | 0.700377 |
| <i>H2-Ob</i>         | chr17:34238902-34245907   | 19.6470  | 19.5198  | -0.0094 | 0.943303 |
| <i>Uqcc3</i>         | chr19:8880015-8880933     | 44.0638  | 43.7641  | -0.0098 | 0.934083 |
| <i>Stx2</i>          | chr5:128984556-129008574  | 2.9881   | 3.0972   | 0.0517  | 0.620061 |
| <i>Tbc1d23</i>       | chr16:57168865-57231466   | 16.7955  | 17.2205  | 0.0360  | 0.427124 |
| <i>Rnf6</i>          | chr5:146209191-146221555  | 26.1447  | 26.8380  | 0.0378  | 0.603202 |
| <i>Gm26904</i>       | chr17:46471500-46825221   | 6.1084   | 6.0445   | -0.0152 | 0.935513 |
| <i>Lyrn4</i>         | chr13:35978796-36117357   | 8.1969   | 8.4822   | 0.0494  | 0.685884 |
| <i>Vhl</i>           | chr6:113623958-113631633  | 12.4922  | 12.8399  | 0.0396  | 0.613456 |
| <i>Shhg5</i>         | chr9:88521051-88522929    | 35.2665  | 36.2599  | 0.0401  | 0.622432 |
| <i>Gm19705</i>       | chr1:136670768-136690804  | 7.7226   | 7.9814   | 0.0476  | 0.446622 |
| <i>C630016N16Rik</i> | chr7:30729578-30745929    | 6.3996   | 6.6869   | 0.0634  | 0.712675 |
| <i>A1987944</i>      | chr7:41373771-41393260    | 18.4113  | 18.3206  | -0.0071 | 0.934485 |
| <i>Pdcd1</i>         | chr7:141408134-141414136  | 18.0494  | 18.5915  | 0.0427  | 0.694815 |
| <i>Tpcn2</i>         | chr7:145253922-145283927  | 7.0244   | 7.2624   | 0.0481  | 0.655470 |
| <i>Thyn1</i>         | chr9:26999676-27007330    | 32.8157  | 33.7793  | 0.0418  | 0.644950 |
| <i>Hdac7</i>         | chr15:97792663-97844502   | 17.1997  | 17.8140  | 0.0506  | 0.760788 |
| <i>Taf1a</i>         | chr1:183388980-183409353  | 14.2835  | 14.1921  | -0.0093 | 0.899950 |
| <i>Gnpda1</i>        | chr18:38327557-38339003   | 7.3388   | 7.3168   | -0.0043 | 0.939756 |
| <i>Atp9b</i>         | chr18:80734142-80934058   | 31.4876  | 31.5855  | 0.0045  | 0.933762 |
| <i>Tmem87a</i>       | chr2:120355311-120404113  | 21.4848  | 21.5241  | 0.0026  | 0.964351 |
| <i>Rpl32</i>         | chr6:115805504-115808747  | 570.6508 | 600.4701 | 0.0735  | 0.760372 |
| <i>Prkaa1</i>        | chr15:5143860-5181899     | 20.4840  | 20.4236  | -0.0043 | 0.965083 |
| <i>Phospho2</i>      | chr2:69789622-69800005    | 11.7695  | 11.7083  | -0.0075 | 0.943179 |
| <i>Dtwd1</i>         | chr2:126152140-126165279  | 5.1428   | 5.3599   | 0.0597  | 0.752653 |
| <i>Dpm1</i>          | chr2:168209047-168230591  | 8.1501   | 8.3880   | 0.0415  | 0.707870 |
| <i>Il11ra1</i>       | chr4:41699988-41769474    | 1.6163   | 1.6890   | 0.0634  | 0.615131 |
| <i>Aamad2</i>        | chr7:97550330-97579497    | 6.7892   | 6.6805   | -0.0233 | 0.891256 |
| <i>Ndufaf2</i>       | chr13:108052589-108158625 | 6.3703   | 6.6934   | 0.0714  | 0.657333 |
| <i>Gm15567</i>       | chr7:27249262-27257932    | 2.7714   | 2.8950   | 0.0629  | 0.691964 |
| <i>2810403D21Rik</i> | chrX:108834477-108974906  | 1.0093   | 1.0506   | 0.0579  | 0.755810 |
| <i>Ifit2</i>         | chr19:34550693-34576419   | 34.8930  | 35.8740  | 0.0400  | 0.692044 |
| <i>Pkd2l2</i>        | chr18:34409422-34442789   | 8.6690   | 8.9704   | 0.0493  | 0.697162 |
| <i>Hist1h2bm</i>     | chr13:21722097-21722478   | 14.1719  | 14.9716  | 0.0792  | 0.847190 |
| <i>Fam136a</i>       | chr6:86365682-86370057    | 12.6189  | 13.0232  | 0.0455  | 0.734278 |
| <i>Arhgdib</i>       | chr6:136923522-136941899  | 343.7938 | 341.8583 | -0.0081 | 0.957481 |
| <i>Gm26865</i>       | chr18:4373668-4379980     | 2.7692   | 2.7308   | -0.0201 | 0.908112 |
| <i>Exosc10</i>       | chr4:148558428-148582401  | 39.5893  | 39.7288  | 0.0051  | 0.908837 |
| <i>O610010K14Rik</i> | chr11:70235205-70237914   | 15.3620  | 15.8650  | 0.0465  | 0.713126 |
| <i>Rpf2</i>          | chr10:40223245-40247036   | 15.4965  | 15.3599  | -0.0128 | 0.921683 |
| <i>Lrrc14b</i>       | chr13:74359577-74364005   | 2.5283   | 2.6443   | 0.0647  | 0.637164 |
| <i>Smc1a</i>         | chrX:152016427-152062694  | 51.5397  | 51.6670  | 0.0036  | 0.948168 |
| <i>Tmx4</i>          | chr2:134594184-134644145  | 6.7837   | 6.9606   | 0.0371  | 0.594756 |
| <i>Zfp341</i>        | chr2:154613296-154646821  | 1.4758   | 1.4545   | -0.0210 | 0.895456 |
| <i>Agpat3</i>        | chr10:78269177-78352489   | 18.6523  | 19.1533  | 0.0382  | 0.630572 |
| <i>Spin1</i>         | chr13:51100879-51152546   | 15.7994  | 16.2173  | 0.0377  | 0.602417 |
| <i>Rpl10</i>         | chrX:74270811-74273135    | 23.4210  | 23.3566  | -0.0040 | 0.967422 |
| <i>Fam118a</i>       | chr15:85037061-85062828   | 16.3975  | 16.3871  | -0.0009 | 0.987409 |
| <i>Rexo1</i>         | chr10:80540921-80561560   | 9.9479   | 9.9309   | -0.0025 | 0.984210 |
| <i>Noc4l</i>         | chr5:110648417-110653417  | 10.8309  | 11.1943  | 0.0476  | 0.673485 |
| <i>Phf10</i>         | chr17:14945008-14961273   | 14.3349  | 14.3184  | -0.0017 | 0.982815 |
| <i>Rasal3</i>        | chr17:32390658-32403583   | 118.8748 | 118.8679 | -0.0001 | 0.999359 |
| <i>Ppp1r10</i>       | chr17:35916433-35932281   | 23.7254  | 23.7540  | 0.0017  | 0.983340 |
| <i>Trappc1</i>       | chr11:69323979-69325793   | 22.0445  | 22.7359  | 0.0445  | 0.720681 |
| <i>Tsen34</i>        | chr7:3693374-3701023      | 3.9559   | 4.0910   | 0.0484  | 0.512223 |
| <i>Phlpp2</i>        | chr8:109868541-109944671  | 0.8074   | 0.8503   | 0.0746  | 0.800870 |
| <i>Mitd1</i>         | chr1:37874800-37890411    | 33.4647  | 34.4084  | 0.0401  | 0.732754 |
| <i>Mga</i>           | chr2:119897227-119969581  | 24.6836  | 25.2655  | 0.0336  | 0.519611 |
| <i>Homer1</i>        | chr13:93303756-93404129   | 2.8624   | 2.9564   | 0.0466  | 0.706737 |
| <i>Ndufa3</i>        | chr7:3617372-3620163      | 59.9141  | 59.2513  | -0.0160 | 0.931360 |
| <i>Tmem60</i>        | chr5:20882190-20886870    | 12.3243  | 12.7412  | 0.0480  | 0.734359 |
| <i>Chmp3</i>         | chr6:71543796-71582609    | 34.8131  | 34.7926  | -0.0009 | 0.990842 |
| <i>Ibtk</i>          | chr9:85687360-85749334    | 28.6821  | 28.7890  | 0.0054  | 0.883340 |
| <i>Hyal2</i>         | chr9:107569116-107572776  | 3.1277   | 3.2602   | 0.0598  | 0.644993 |
| <i>Rps3a1</i>        | chr3:86137939-86142702    | 113.4469 | 117.3386 | 0.0487  | 0.783676 |
| <i>Sarnp</i>         | chr10:128821770-128877638 | 12.1599  | 11.9774  | -0.0218 | 0.908201 |
| <i>Pnpla8</i>        | chr12:44221369-44312343   | 13.7463  | 13.7229  | -0.0025 | 0.974640 |
| <i>Pgm2l1</i>        | chr7:100227393-100278868  | 6.0968   | 6.2730   | 0.0411  | 0.689981 |
| <i>Gpatch2l</i>      | chr12:86241889-86291414   | 17.9418  | 17.9896  | 0.0038  | 0.923193 |
| <i>Zfp287</i>        | chr11:62700355-62731905   | 7.0493   | 7.2482   | 0.0401  | 0.633121 |

|                      |                           |          |          |         |          |
|----------------------|---------------------------|----------|----------|---------|----------|
| <i>Map1c3b</i>       | chr8:121590360-121598760  | 9.3144   | 9.5604   | 0.0376  | 0.580743 |
| <i>Mrps9</i>         | chr1:42851232-42905682    | 35.8373  | 36.7265  | 0.0354  | 0.438519 |
| <i>Gm17711</i>       | chr10:18011267-18011505   | 131.5055 | 129.6394 | -0.0206 | 0.920763 |
| <i>Map7</i>          | chr10:20148470-20281589   | 7.8921   | 8.3661   | 0.0841  | 0.773018 |
| <i>Ppa1</i>          | chr10:61648551-61674168   | 10.8895  | 11.2344  | 0.0450  | 0.713802 |
| <i>A230046K03Rik</i> | chr10:83543940-83596469   | 40.1339  | 41.1289  | 0.0353  | 0.641122 |
| <i>Gm17249</i>       | chr10:84619331-84622578   | 3.4364   | 3.5593   | 0.0507  | 0.732933 |
| <i>Apaf1</i>         | chr10:90989310-91082770   | 8.5054   | 8.7274   | 0.0372  | 0.651783 |
| <i>F420014N23Rik</i> | chr10:127195248-127202643 | 4.0581   | 4.2225   | 0.0573  | 0.775221 |
| <i>Wdr92</i>         | chr11:17182106-17233796   | 22.6177  | 23.1848  | 0.0357  | 0.501295 |
| <i>Pnpt1</i>         | chr11:29130743-29161828   | 28.0912  | 28.0651  | -0.0013 | 0.987819 |
| <i>Ulk2</i>          | chr11:61775648-61855073   | 14.8203  | 14.8447  | 0.0024  | 0.970564 |
| <i>Slc25a35</i>      | chr11:68968130-68974365   | 1.4871   | 1.4622   | -0.0243 | 0.898666 |
| <i>Gm21988</i>       | chr11:70235205-70239830   | 22.3077  | 22.2278  | -0.0052 | 0.968416 |
| <i>Znhit3</i>        | chr11:84910949-84916366   | 4.6023   | 4.7600   | 0.0486  | 0.715703 |
| <i>Zbtb25</i>        | chr12:76347781-76369602   | 8.2144   | 8.4601   | 0.0425  | 0.568298 |
| <i>Gphn</i>          | chr12:78226654-78684767   | 5.1558   | 5.3197   | 0.0451  | 0.619792 |
| <i>Lin52</i>         | chr12:84451507-84531533   | 4.5628   | 4.5114   | -0.0163 | 0.867688 |
| <i>Hist1h2ai</i>     | chr13:21716411-21717452   | 7.1035   | 6.8787   | -0.0464 | 0.884783 |
| <i>Snrnp48</i>       | chr13:38204938-38227663   | 35.7313  | 35.7460  | 0.0006  | 0.991527 |
| <i>Msh3</i>          | chr13:92211880-92355003   | 17.6870  | 17.6857  | -0.0001 | 0.998933 |
| <i>Cdk7</i>          | chr13:100697026-100730942 | 8.4714   | 8.4854   | 0.0024  | 0.959887 |
| <i>Itga2</i>         | chr13:114835915-114932041 | 1.1306   | 1.1082   | -0.0289 | 0.838965 |
| <i>Rab28</i>         | chr5:41624975-41708155    | 10.6753  | 10.5981  | -0.0105 | 0.913444 |
| <i>NA</i>            | chr5:73193827-73256588    | 18.7659  | 19.2777  | 0.0388  | 0.600002 |
| <i>Cep135</i>        | chr5:76588697-76646466    | 11.1402  | 11.1653  | 0.0032  | 0.956201 |
| <i>Gm15777</i>       | chr5:100670858-100678105  | 6.6777   | 7.0014   | 0.0683  | 0.721146 |
| <i>BC005561</i>      | chr5:104508351-104522383  | 10.1227  | 10.1173  | -0.0008 | 0.991978 |
| <i>Tmem116</i>       | chr5:121451892-121524183  | 2.7379   | 2.7094   | -0.0151 | 0.912426 |
| <i>Acad10</i>        | chr5:121621025-121660514  | 2.7369   | 2.7179   | -0.0100 | 0.938518 |
| <i>Slc12a9</i>       | chr5:137314557-137333597  | 3.8879   | 4.0094   | 0.0444  | 0.489623 |
| <i>Mrp135</i>        | chr6:71813002-71823810    | 6.4013   | 6.3611   | -0.0091 | 0.934152 |
| <i>Vamp8</i>         | chr6:72385222-72390703    | 27.1688  | 27.9879  | 0.0429  | 0.738295 |
| <i>Aldh11</i>        | chr6:90486426-90600203    | 0.9683   | 1.0200   | 0.0750  | 0.764982 |
| <i>Ldhd</i>          | chr6:142490248-142507957  | 7.7333   | 8.0468   | 0.0573  | 0.743351 |
| <i>Zfp446</i>        | chr7:12977847-12984340    | 1.7565   | 1.8328   | 0.0613  | 0.725407 |
| <i>Cd3eap</i>        | chr7:19356848-19359483    | 11.0245  | 10.9821  | -0.0056 | 0.957872 |
| <i>Pde8a</i>         | chr7:81213595-81334533    | 2.4302   | 2.4086   | -0.0128 | 0.939732 |
| <i>Gm26981</i>       | chr7:92729839-92733748    | 8.7631   | 9.0115   | 0.0403  | 0.633781 |
| <i>Mtg1</i>          | chr7:140137563-140150786  | 3.5827   | 3.5481   | -0.0140 | 0.926336 |
| <i>Golga7</i>        | chr8:23241352-23257074    | 11.3660  | 11.2948  | -0.0091 | 0.937594 |
| <i>Gm26768</i>       | chr8:34094547-34096149    | 12.4779  | 12.9092  | 0.0490  | 0.649086 |
| <i>Prmt10</i>        | chr8:77549396-77581338    | 11.0011  | 11.0225  | 0.0028  | 0.946938 |
| <i>Ldhd</i>          | chr8:111623784-111630374  | 4.5368   | 4.6964   | 0.0499  | 0.748007 |
| <i>Zfp1</i>          | chr8:111643442-111671008  | 18.1090  | 18.6166  | 0.0399  | 0.692622 |
| <i>Rpusd4</i>        | chr9:35267864-35277731    | 13.0317  | 13.3820  | 0.0383  | 0.339462 |
| <i>Rnf111</i>        | chr9:70425428-70503725    | 22.0425  | 22.1078  | 0.0043  | 0.954649 |
| <i>Nat6</i>          | chr9:107578886-107584048  | 3.6858   | 3.8361   | 0.0576  | 0.710011 |
| <i>Ndufaf3</i>       | chr9:108565865-108567342  | 14.9169  | 14.8223  | -0.0092 | 0.904612 |
| <i>Wdr48</i>         | chr9:119894894-119926579  | 28.8976  | 29.5689  | 0.0331  | 0.447334 |
| <i>A230072C01Rik</i> | chrX:20961683-20986737    | 3.2099   | 3.3444   | 0.0592  | 0.659571 |
| <i>C330007P06Rik</i> | chrX:36823736-36874111    | 5.3319   | 5.3159   | -0.0043 | 0.961969 |
| <i>Rps24-ps3</i>     | chrX:79195046-79195448    | 126.7437 | 133.8966 | 0.0792  | 0.771752 |
| <i>A630033H20Rik</i> | chrX:107148926-107173661  | 9.4016   | 9.6495   | 0.0375  | 0.622947 |
| <i>Gprasp1</i>       | chrX:135742732-135803474  | 11.6116  | 11.9283  | 0.0388  | 0.636927 |
| <i>Map3k15</i>       | chrX:159988432-160123351  | 12.3133  | 12.6260  | 0.0362  | 0.616355 |
| <i>1700088E04Rik</i> | chr15:79134654-79141251   | 14.5427  | 15.1597  | 0.0600  | 0.762768 |
| <i>Cbx7</i>          | chr15:79915806-79971119   | 40.7894  | 40.8026  | 0.0005  | 0.996694 |
| <i>Pphln1</i>        | chr15:93398349-93491913   | 9.4576   | 9.7223   | 0.0398  | 0.575021 |
| <i>Timm23</i>        | chr14:32180161-32201898   | 6.2094   | 6.4305   | 0.0505  | 0.708119 |
| <i>Trav4-4-dv10</i>  | chr14:53683646-53684176   | 13.8381  | 13.6206  | -0.0229 | 0.820807 |
| <i>Tssk4</i>         | chr14:55650181-55652539   | 2.4432   | 2.5768   | 0.0768  | 0.710984 |
| <i>Sugt1</i>         | chr14:79587690-79629755   | 46.9167  | 46.6457  | -0.0084 | 0.952646 |
| <i>Chd1</i>          | chr17:15704966-15772610   | 34.4769  | 35.3469  | 0.0360  | 0.634769 |
| <i>Ccdc167</i>       | chr17:29689377-29717012   | 13.1508  | 13.5322  | 0.0412  | 0.667402 |
| <i>Kank3</i>         | chr17:33810519-33822918   | 2.7408   | 2.7113   | -0.0156 | 0.918142 |
| <i>A930015D03Rik</i> | chr17:35994452-36038435   | 14.9243  | 15.5078  | 0.0553  | 0.735264 |
| <i>Slc29a1</i>       | chr17:45585199-45599606   | 9.6517   | 9.6251   | -0.0040 | 0.969282 |
| <i>Anks3</i>         | chr16:4941414-4964237     | 22.1347  | 22.7231  | 0.0378  | 0.512018 |
| <i>Dexi</i>          | chr16:10530206-10543054   | 10.7718  | 10.7261  | -0.0061 | 0.870970 |
| <i>Ydjc</i>          | chr16:17144620-17160701   | 2.1625   | 2.1478   | -0.0098 | 0.942733 |

|                      |                           |          |          |         |          |
|----------------------|---------------------------|----------|----------|---------|----------|
| <i>Wdr53</i>         | chr16:32247226-32257083   | 8.3434   | 8.2461   | -0.0169 | 0.907553 |
| <i>Klc2</i>          | chr19:5107745-5118560     | 4.7290   | 4.8875   | 0.0475  | 0.672988 |
| <i>Incenp</i>        | chr19:9872296-9899533     | 8.3869   | 8.6720   | 0.0482  | 0.775161 |
| <i>Tctn3</i>         | chr19:40596445-40612233   | 2.9713   | 2.9444   | -0.0131 | 0.929485 |
| <i>Stat1</i>         | chr1:52119437-52161865    | 262.0614 | 269.8355 | 0.0422  | 0.735459 |
| <i>Hdlbp</i>         | chr1:93405939-93478808    | 27.4796  | 28.1522  | 0.0349  | 0.532537 |
| <i>Slc41a1</i>       | chr1:131827492-131848865  | 11.7812  | 12.1700  | 0.0468  | 0.763217 |
| <i>Nuak2</i>         | chr1:132316125-132333488  | 1.5955   | 1.5727   | -0.0208 | 0.871375 |
| <i>Csnk1g3</i>       | chr18:53862112-53955684   | 11.2655  | 11.5603  | 0.0373  | 0.385852 |
| <i>Ptpn2</i>         | chr18:67665510-67724595   | 31.0141  | 30.9693  | -0.0021 | 0.980929 |
| <i>Mbd2</i>          | chr18:70568188-70626131   | 66.2011  | 66.2327  | 0.0007  | 0.992919 |
| <i>Plcb2</i>         | chr2:118707516-118728438  | 30.8758  | 31.6967  | 0.0379  | 0.649904 |
| <i>Itpa</i>          | chr2:130667609-130681614  | 7.5077   | 7.4429   | -0.0125 | 0.920694 |
| <i>Mcts2</i>         | chr2:152687147-152687940  | 10.9281  | 11.3985  | 0.0608  | 0.662818 |
| <i>Pag1</i>          | chr3:9687478-9833679      | 24.5358  | 25.2622  | 0.0421  | 0.714132 |
| <i>Mynn</i>          | chr3:30602086-30618492    | 15.1120  | 15.1319  | 0.0019  | 0.968441 |
| <i>Prkci</i>         | chr3:30995746-31052741    | 3.6846   | 3.6666   | -0.0071 | 0.944899 |
| <i>Pik3ca</i>        | chr3:32397670-32468486    | 26.1266  | 26.7564  | 0.0344  | 0.621221 |
| <i>Crtc2</i>         | chr3:90254162-90264125    | 5.9559   | 6.1592   | 0.0484  | 0.707385 |
| <i>Aph1a</i>         | chr3:95893968-95898288    | 3.4033   | 3.5280   | 0.0519  | 0.634232 |
| <i>Rmdn1</i>         | chr4:19575161-19606932    | 5.6754   | 5.8588   | 0.0459  | 0.568183 |
| <i>Akirin2</i>       | chr4:34550936-34566908    | 27.7537  | 28.4609  | 0.0363  | 0.424801 |
| <i>Zbtb5</i>         | chr4:44991241-45012412    | 6.7223   | 6.7359   | 0.0029  | 0.955930 |
| <i>Ptbp3</i>         | chr4:59471867-59549364    | 102.1198 | 102.2210 | 0.0014  | 0.985624 |
| <i>Megf9</i>         | chr4:70427064-70534995    | 1.1924   | 1.1725   | -0.0243 | 0.929846 |
| <i>Prdx1</i>         | chr4:116685543-116700822  | 22.1758  | 22.0436  | -0.0086 | 0.947853 |
| <i>Gm12841</i>       | chr4:117883620-117885995  | 27.8534  | 27.6759  | -0.0092 | 0.881019 |
| <i>Snora61</i>       | chr4:132310239-132310369  | 45.7047  | 47.6625  | 0.0605  | 0.762067 |
| <i>Tmem240</i>       | chr4:155734799-155740564  | 0.9922   | 1.0406   | 0.0686  | 0.741216 |
| <i>Psmc10</i>        | chrX:140948428-140956728  | 13.8834  | 14.3149  | 0.0442  | 0.697276 |
| <i>Pla2g12a</i>      | chr3:129878621-129895821  | 4.2345   | 4.3981   | 0.0547  | 0.711360 |
| <i>Ctage5</i>        | chr12:59129719-59191583   | 18.4832  | 18.9222  | 0.0339  | 0.556790 |
| <i>Gm6421</i>        | chr13:117358211-117358622 | 10.6115  | 10.1883  | -0.0587 | 0.877158 |
| <i>Cd79a</i>         | chr7:24897380-24902197    | 3.8180   | 3.7610   | -0.0217 | 0.902648 |
| <i>Hyou1</i>         | chr9:44379489-44392369    | 16.9828  | 17.0278  | 0.0038  | 0.960437 |
| <i>Zfp51</i>         | chr17:21450351-21465591   | 26.2915  | 27.0314  | 0.0400  | 0.744894 |
| <i>Gm20517</i>       | chr17:47611588-47683861   | 4.1850   | 4.1823   | -0.0009 | 0.987102 |
| <i>Ybey</i>          | chr10:76459568-76469114   | 2.1593   | 2.1344   | -0.0168 | 0.911427 |
| <i>Sypl</i>          | chr12:32953890-32979050   | 2.7782   | 2.8687   | 0.0462  | 0.683617 |
| <i>Txndc5</i>        | chr13:38500272-38528824   | 16.4898  | 16.9391  | 0.0388  | 0.694201 |
| <i>Gm24336</i>       | chr19:44113978-44114124   | 161.9702 | 155.6743 | -0.0572 | 0.859104 |
| <i>Ccdc34</i>        | chr2:110017816-110173360  | 0.8958   | 0.9283   | 0.0514  | 0.721400 |
| <i>Trpm7</i>         | chr2:126791564-126876230  | 28.4413  | 29.1339  | 0.0347  | 0.651017 |
| <i>Smad5</i>         | chr13:56703009-56742377   | 18.5549  | 19.0543  | 0.0383  | 0.696235 |
| <i>Il2rg</i>         | chrX:101264377-101268255  | 157.9648 | 158.7101 | 0.0068  | 0.899206 |
| <i>Zfp955b</i>       | chr17:33289648-33303196   | 7.0752   | 7.3019   | 0.0455  | 0.571046 |
| <i>Rbm15</i>         | chr3:107326109-107333289  | 25.0462  | 25.0904  | 0.0025  | 0.978762 |
| <i>Nek1</i>          | chr8:60993194-61131346    | 3.3529   | 3.4529   | 0.0424  | 0.634056 |
| <i>Usp47</i>         | chr7:112023505-112111386  | 45.0342  | 45.2500  | 0.0069  | 0.845429 |
| <i>Scarb1</i>        | chr5:125277086-125341094  | 1.5754   | 1.5655   | -0.0091 | 0.947427 |
| <i>Gm23455</i>       | chr9:15316488-15316588    | 194.6165 | 191.7583 | -0.0213 | 0.917765 |
| <i>Gdap2</i>         | chr3:100162380-100206981  | 9.6538   | 9.9229   | 0.0397  | 0.689635 |
| <i>Arsa</i>          | chr15:89472475-89477425   | 6.4243   | 6.6280   | 0.0450  | 0.649957 |
| <i>Arl6ip6</i>       | chr2:53191725-53219220    | 8.1703   | 8.1376   | -0.0058 | 0.949841 |
| <i>Stk39</i>         | chr2:68210444-68472268    | 8.9747   | 9.2216   | 0.0391  | 0.674848 |
| <i>Gapdhs</i>        | chr7:30729774-30743681    | 3.7664   | 3.7265   | -0.0154 | 0.915970 |
| <i>Abcg2</i>         | chr6:58584522-58692869    | 3.2349   | 3.2106   | -0.0109 | 0.925425 |
| <i>Farsb</i>         | chr1:78417957-78488859    | 30.4692  | 30.4731  | 0.0002  | 0.998038 |
| <i>Slc2a8</i>        | chr2:32972989-32982083    | 1.8456   | 1.9405   | 0.0724  | 0.773823 |
| <i>Dnase1l1</i>      | chrX:74273216-74282337    | 5.2191   | 5.3931   | 0.0473  | 0.759429 |
| <i>4931406C07Rik</i> | chr9:15283336-15306448    | 1.3935   | 1.3705   | -0.0241 | 0.839328 |
| <i>Cntrob</i>        | chr11:69299486-69323775   | 3.3292   | 3.4351   | 0.0452  | 0.714469 |
| <i>Rph3al</i>        | chr11:75830998-75938429   | 1.8545   | 1.9409   | 0.0657  | 0.762155 |
| <i>Recql5</i>        | chr11:115892594-115933477 | 5.1708   | 5.1695   | -0.0004 | 0.997194 |
| <i>Larp4</i>         | chr15:99970073-100016351  | 13.0131  | 13.0358  | 0.0025  | 0.968066 |
| <i>Ndufv2</i>        | chr17:66078794-66101559   | 32.9171  | 32.7114  | -0.0090 | 0.950420 |
| <i>Ddx58</i>         | chr4:40203772-40239828    | 41.3766  | 42.3895  | 0.0349  | 0.662561 |
| <i>Gm24265</i>       | chr5:115489458-115489599  | 427.9866 | 410.1770 | -0.0613 | 0.872801 |
| <i>C730034F03Rik</i> | chr15:89429588-89430868   | 6.6479   | 6.8758   | 0.0486  | 0.693553 |
| <i>Cox16</i>         | chr12:81359025-81485127   | 10.0661  | 10.3577  | 0.0412  | 0.749460 |
| <i>Hist3h2ba</i>     | chr11:58948910-58949532   | 7.9494   | 8.2454   | 0.0527  | 0.705461 |

|                      |                           |          |          |         |          |
|----------------------|---------------------------|----------|----------|---------|----------|
| <i>Orc2</i>          | chr1:58462770-58505109    | 14.6608  | 15.0582  | 0.0386  | 0.700838 |
| <i>Rdh5</i>          | chr10:128913592-128922888 | 12.0746  | 12.0454  | -0.0035 | 0.968823 |
| <i>Shmt1</i>         | chr11:60788103-60811718   | 5.0282   | 5.0225   | -0.0016 | 0.957339 |
| <i>Btbd6</i>         | chr12:112976481-112978930 | 27.2289  | 27.9023  | 0.0352  | 0.472710 |
| <i>Exoc4</i>         | chr6:33249084-33973979    | 9.8651   | 10.1083  | 0.0351  | 0.630186 |
| <i>Suclg2</i>        | chr6:95474133-95718837    | 11.1833  | 11.5076  | 0.0412  | 0.742832 |
| <i>Gm1966</i>        | chr7:106601242-106604035  | 119.8448 | 122.6100 | 0.0329  | 0.537573 |
| <i>Tusc3</i>         | chr8:39005866-39165112    | 23.3407  | 23.3092  | -0.0019 | 0.980009 |
| <i>C330011M18Rik</i> | chr8:84065235-84067287    | 6.8340   | 7.0785   | 0.0507  | 0.796348 |
| <i>Anp32a</i>        | chr9:62341292-62378812    | 62.2779  | 64.1090  | 0.0418  | 0.740732 |
| <i>Rbmx2</i>         | chrX:48695003-48710723    | 3.4594   | 3.6003   | 0.0576  | 0.713229 |
| <i>Fam83f</i>        | chr15:80671846-80700420   | 1.3212   | 1.3908   | 0.0741  | 0.758370 |
| <i>Rarb</i>          | chr14:16430841-16575472   | 2.8757   | 2.8546   | -0.0106 | 0.956120 |
| <i>Hsp90ab1</i>      | chr17:45567774-45573271   | 232.7636 | 240.2526 | 0.0457  | 0.761942 |
| <i>Kat2b</i>         | chr17:53566860-53672720   | 34.1973  | 34.2814  | 0.0035  | 0.959514 |
| <i>D17Wsu104e</i>    | chr17:56175743-56183920   | 14.7211  | 15.1350  | 0.0400  | 0.627781 |
| <i>C1pp</i>          | chr17:56990263-56996371   | 22.9141  | 22.8035  | -0.0070 | 0.957634 |
| <i>Pms1</i>          | chr1:53189186-53297018    | 4.7341   | 4.7202   | -0.0042 | 0.967723 |
| <i>Atxn7l2</i>       | chr3:108202221-108210934  | 2.8631   | 2.9659   | 0.0509  | 0.659953 |
| <i>Usp1</i>          | chr4:98923809-98935543    | 18.9371  | 18.9722  | 0.0027  | 0.961718 |
| <i>Il27ra</i>        | chr8:84030286-84042575    | 115.9419 | 116.2414 | 0.0037  | 0.966106 |
| <i>Thoc1</i>         | chr18:9958179-9995484     | 27.7067  | 27.6149  | -0.0048 | 0.969594 |
| <i>Ilf2</i>          | chr3:90476200-90488379    | 49.5796  | 49.5210  | -0.0017 | 0.986288 |
| <i>Gnpat</i>         | chr8:124863032-124890057  | 25.4172  | 25.5187  | 0.0057  | 0.914895 |
| <i>Xk</i>            | chrX:9272755-9313250      | 1.0327   | 1.0769   | 0.0605  | 0.705205 |
| <i>Pacsin1</i>       | chr17:27655508-27711106   | 11.1542  | 11.5101  | 0.0453  | 0.758246 |
| <i>Ndst1</i>         | chr18:60685977-60713389   | 11.0856  | 11.0999  | 0.0019  | 0.985416 |
| <i>Gm13456</i>       | chr2:40555751-40557116    | 59.0169  | 57.8036  | -0.0300 | 0.892667 |
| <i>Eif1ad</i>        | chr19:5366812-5371511     | 20.9169  | 20.8716  | -0.0031 | 0.975881 |
| <i>Rpl22</i>         | chr4:152325741-152334071  | 86.7297  | 89.7018  | 0.0486  | 0.807921 |
| <i>Cpped1</i>        | chr16:11803720-11909445   | 1.1810   | 1.2365   | 0.0662  | 0.748741 |
| <i>Ap4e1</i>         | chr2:127008716-127067909  | 6.6887   | 6.7043   | 0.0033  | 0.953381 |
| <i>Pdzd8</i>         | chr19:59296083-59345780   | 20.1052  | 20.5905  | 0.0344  | 0.601238 |
| <i>Bloc1s1</i>       | chr10:128917881-128924035 | 21.3011  | 21.9491  | 0.0432  | 0.758836 |
| <i>Apopt1</i>        | chr12:111713260-111754980 | 6.5391   | 6.7747   | 0.0511  | 0.781598 |
| <i>Asb7</i>          | chr7:66644564-66689596    | 4.1164   | 4.2241   | 0.0373  | 0.403765 |
| <i>St13</i>          | chr15:81363668-81400077   | 37.3401  | 37.1502  | -0.0074 | 0.964351 |
| <i>Cul3</i>          | chr1:80264922-80340480    | 63.7942  | 63.9674  | 0.0039  | 0.953439 |
| <i>Madd</i>          | chr2:91137359-91183837    | 42.1118  | 42.3107  | 0.0068  | 0.919248 |
| <i>Extl2</i>         | chr3:116007461-116029016  | 2.0101   | 1.9882   | -0.0159 | 0.882747 |
| <i>Plekhm2</i>       | chr4:141625733-141664899  | 5.5551   | 5.5353   | -0.0052 | 0.973110 |
| <i>Fech</i>          | chr18:64456549-64489066   | 9.2901   | 9.5336   | 0.0373  | 0.531495 |
| <i>Hmgb1-ps8</i>     | chr10:22262741-22263367   | 104.8121 | 104.8108 | 0.0000  | 0.999852 |
| <i>Dcp1b</i>         | chr6:119175251-119221614  | 7.8705   | 8.0942   | 0.0404  | 0.672661 |
| <i>Slc38a2</i>       | chr15:96687393-96699698   | 50.0680  | 50.2040  | 0.0039  | 0.964421 |
| <i>Zfp422</i>        | chr6:116624015-116628999  | 5.6499   | 5.6397   | -0.0026 | 0.967544 |
| <i>Gm26617</i>       | chrX:94793102-94798237    | 1.7752   | 1.8438   | 0.0547  | 0.763750 |
| <i>Dync1h1</i>       | chr12:110601451-110666945 | 66.6694  | 68.4922  | 0.0389  | 0.722147 |
| <i>Klhl8</i>         | chr5:103861972-103911259  | 2.9238   | 2.9002   | -0.0117 | 0.927152 |
| <i>Mxi1</i>          | chr19:53310505-53375810   | 5.4256   | 5.5917   | 0.0435  | 0.735869 |
| <i>Nfe2l2</i>        | chr2:75675512-75704641    | 29.6442  | 30.3155  | 0.0323  | 0.441285 |
| <i>Ankfy1</i>        | chr11:72690005-7272146    | 18.8209  | 19.2250  | 0.0306  | 0.420898 |
| <i>Tmed2</i>         | chr5:124540694-124550506  | 10.2488  | 10.1987  | -0.0071 | 0.952434 |
| <i>Dctn6</i>         | chr8:34090419-34108796    | 24.9684  | 25.5859  | 0.0352  | 0.612748 |
| <i>Zfp882</i>        | chr8:71908607-71916354    | 7.2557   | 7.4586   | 0.0398  | 0.749661 |
| <i>Zrsr2</i>         | chrX:163935442-163958661  | 9.0341   | 9.2599   | 0.0356  | 0.662986 |
| <i>Eif3h</i>         | chr15:51786557-51865481   | 140.7833 | 140.2874 | -0.0051 | 0.971960 |
| <i>Dvl3</i>          | chr16:20516981-20532520   | 2.6647   | 2.7728   | 0.0574  | 0.763248 |
| <i>Nolc1</i>         | chr19:46075862-46085528   | 26.0287  | 26.1174  | 0.0049  | 0.941800 |
| <i>Coq10b</i>        | chr1:55052769-55072701    | 11.2496  | 11.5905  | 0.0431  | 0.786805 |
| <i>Dpy19l4</i>       | chr4:11261314-11322137    | 5.4927   | 5.4860   | -0.0018 | 0.985726 |
| <i>Hint1</i>         | chr11:54866382-54870501   | 84.5242  | 84.0617  | -0.0079 | 0.958999 |
| <i>Spop</i>          | chr11:95414079-95493406   | 18.2235  | 18.6590  | 0.0341  | 0.468743 |
| <i>Nat9</i>          | chr11:115182831-115187859 | 3.2911   | 3.4205   | 0.0557  | 0.643522 |
| <i>Copg2</i>         | chr6:30747553-30896794    | 14.3400  | 14.6872  | 0.0345  | 0.672504 |
| <i>Apobr</i>         | chr7:126584941-126589112  | 3.1095   | 3.0930   | -0.0077 | 0.951837 |
| <i>Ndrp1</i>         | chr15:66929320-66969640   | 5.0536   | 5.0407   | -0.0037 | 0.976460 |
| <i>Banf1</i>         | chr19:5364640-5366645     | 49.7890  | 49.5480  | -0.0070 | 0.963669 |
| <i>Tmem81</i>        | chr1:132506229-132508637  | 8.2645   | 8.5137   | 0.0429  | 0.491074 |
| <i>Crcp</i>          | chr5:130029289-130060789  | 18.3386  | 18.2991  | -0.0031 | 0.969003 |
| <i>Arid2</i>         | chr15:96287517-96404992   | 17.0796  | 17.1377  | 0.0049  | 0.953889 |

|                   |                           |          |          |         |          |
|-------------------|---------------------------|----------|----------|---------|----------|
| <i>Csnk2b</i>     | chr17:35116195-35122053   | 37.0126  | 37.9490  | 0.0360  | 0.663036 |
| <i>Zbtb21</i>     | chr16:97947434-97962621   | 7.2273   | 7.4266   | 0.0392  | 0.646300 |
| <i>Mettl23</i>    | chr11:116843277-116854263 | 45.2976  | 45.4359  | 0.0044  | 0.935011 |
| <i>Lca5</i>       | chr9:83390292-83441127    | 1.4324   | 1.4838   | 0.0509  | 0.745622 |
| <i>Pdpc1</i>      | chr17:24073679-24150924   | 21.3249  | 21.4281  | 0.0070  | 0.888556 |
| <i>Mtx3</i>       | chr13:92844786-92858230   | 8.2627   | 8.2536   | -0.0016 | 0.988966 |
| <i>Zfp78</i>      | chr7:6371363-6379491      | 2.9024   | 3.0123   | 0.0536  | 0.635345 |
| <i>Lysmd2</i>     | chr9:75625731-75637773    | 4.4276   | 4.6056   | 0.0569  | 0.660981 |
| <i>Glb1</i>       | chr9:114401075-114474376  | 18.2824  | 18.7406  | 0.0357  | 0.580582 |
| <i>Pdrg1</i>      | chr2:153008889-153015427  | 21.6424  | 21.7003  | 0.0039  | 0.939784 |
| <i>Fpgt</i>       | chr3:155084920-155093378  | 14.2740  | 14.2267  | -0.0048 | 0.966922 |
| <i>Angptl1</i>    | chr1:156838561-156861078  | 1.4430   | 1.5186   | 0.0737  | 0.754340 |
| <i>Gripap1</i>    | chrX:7789764-7820567      | 12.8098  | 12.8389  | 0.0033  | 0.967369 |
| <i>Tmem128</i>    | chr5:38260184-38269622    | 23.5915  | 23.6033  | 0.0007  | 0.991387 |
| <i>Car15</i>      | chr16:17835275-17838364   | 5.8825   | 6.1514   | 0.0645  | 0.755855 |
| <i>Kif20b</i>     | chr19:34922357-34975731   | 5.5622   | 5.7200   | 0.0404  | 0.779440 |
| <i>Jrk</i>        | chr15:74702411-74709535   | 6.2960   | 6.2802   | -0.0036 | 0.974600 |
| <i>Sifn2</i>      | chr11:83065111-83070678   | 343.7486 | 344.2471 | 0.0021  | 0.980290 |
| <i>Synj2</i>      | chr17:5941279-6044290     | 7.1579   | 7.1688   | 0.0022  | 0.983570 |
| <i>Zfp36l2</i>    | chr17:84183930-84187947   | 59.3012  | 59.3548  | 0.0013  | 0.990918 |
| <i>Kctd1</i>      | chr18:14968684-15151446   | 2.1289   | 2.1192   | -0.0066 | 0.964169 |
| <i>Pura</i>       | chr18:36281096-36301521   | 11.7988  | 11.8555  | 0.0069  | 0.904999 |
| <i>Wdr47</i>      | chr3:108591278-108645719  | 6.4962   | 6.6771   | 0.0396  | 0.651746 |
| <i>Zfr</i>        | chr15:12117830-12185683   | 32.3103  | 32.9979  | 0.0304  | 0.501127 |
| <i>Gtf2f2</i>     | chr14:75896936-76010865   | 19.6893  | 20.2085  | 0.0376  | 0.683427 |
| <i>Suv420h1</i>   | chr19:3767420-3818303     | 20.1817  | 20.6092  | 0.0302  | 0.410166 |
| <i>Dis3l2</i>     | chr1:86703803-87050097    | 13.6689  | 13.7048  | 0.0038  | 0.959714 |
| <i>Pdik1l</i>     | chr4:134275001-134287895  | 9.8509   | 10.0944  | 0.0352  | 0.669976 |
| <i>Ccdc130</i>    | chr8:84257794-84270380    | 6.7623   | 6.9822   | 0.0462  | 0.658201 |
| <i>Icam1</i>      | chr9:21015959-21028797    | 17.8869  | 18.4584  | 0.0454  | 0.791235 |
| <i>Arfgap3</i>    | chr15:83299739-83350247   | 3.8327   | 3.9565   | 0.0459  | 0.742053 |
| <i>Ube2l3</i>     | chr16:17152012-17202649   | 7.5998   | 7.6241   | 0.0046  | 0.932795 |
| <i>Htt</i>        | chr5:34761739-34912534    | 11.6368  | 11.9635  | 0.0399  | 0.758467 |
| <i>Lrrc24</i>     | chr15:76715275-76722173   | 2.8219   | 2.9497   | 0.0639  | 0.757385 |
| <i>Tacc3</i>      | chr5:33658127-33678995    | 3.8927   | 4.0097   | 0.0427  | 0.795165 |
| <i>Cyb5r4</i>     | chr9:87022013-87077774    | 8.1368   | 8.1502   | 0.0024  | 0.968022 |
| <i>Map2k6</i>     | chr11:110399121-110525522 | 3.9443   | 3.9260   | -0.0067 | 0.949423 |
| <i>Abt1</i>       | chr13:23421538-23423866   | 16.9309  | 16.7839  | -0.0126 | 0.941621 |
| <i>Cd2</i>        | chr3:101275898-101287939  | 281.9123 | 282.5533 | 0.0033  | 0.967015 |
| <i>Clcf1</i>      | chr19:4214237-4223490     | 13.6936  | 14.0988  | 0.0421  | 0.751013 |
| <i>Gm26896</i>    | chr10:81606367-81609791   | 4.2578   | 4.2316   | -0.0089 | 0.959495 |
| <i>Nt5m</i>       | chr11:59839446-59880968   | 3.9342   | 4.0642   | 0.0469  | 0.658978 |
| <i>Pitpnc1</i>    | chr11:107207891-107470699 | 32.9006  | 33.6825  | 0.0339  | 0.610303 |
| <i>Gm20498</i>    | chr12:81358859-81532905   | 13.2371  | 13.5902  | 0.0380  | 0.749132 |
| <i>Limk1</i>      | chr5:134656038-134688590  | 2.6639   | 2.6634   | -0.0003 | 0.997652 |
| <i>Rac1</i>       | chr5:143505477-143528036  | 64.3295  | 65.9333  | 0.0355  | 0.692858 |
| <i>Lins</i>       | chr7:66689888-66717256    | 2.1781   | 2.1758   | -0.0015 | 0.987680 |
| <i>Rassf7</i>     | chr7:141215859-141218658  | 5.3349   | 5.2828   | -0.0142 | 0.926961 |
| <i>Mpi</i>        | chr9:57544255-57552763    | 6.7683   | 6.7775   | 0.0020  | 0.981124 |
| <i>Arid3b</i>     | chr9:57790352-57836793    | 5.9440   | 5.9623   | 0.0044  | 0.961638 |
| <i>Rnf7</i>       | chr9:96470940-96478675    | 16.2485  | 16.7267  | 0.0418  | 0.726804 |
| <i>Gm6472</i>     | chrX:152909503-152910155  | 35.1257  | 34.6728  | -0.0187 | 0.935801 |
| <i>Ap5m1</i>      | chr14:49066494-49087723   | 20.5682  | 21.0428  | 0.0329  | 0.641110 |
| <i>Psme1</i>      | chr14:55578122-55581529   | 123.2225 | 123.2846 | 0.0007  | 0.994573 |
| <i>Zfp942</i>     | chr17:21926959-21962464   | 14.7849  | 15.1296  | 0.0333  | 0.625901 |
| <i>Map4k3</i>     | chr17:80580511-80728093   | 7.6556   | 7.8616   | 0.0383  | 0.640654 |
| <i>Usp16</i>      | chr16:87454702-87483517   | 12.3702  | 12.6348  | 0.0305  | 0.395695 |
| <i>Ankrd13d</i>   | chr19:4270179-4283137     | 3.7510   | 3.7400   | -0.0043 | 0.963912 |
| <i>Gm25894</i>    | chr19:8724250-8724325     | 64.1405  | 66.6633  | 0.0557  | 0.747755 |
| <i>Ak3</i>        | chr19:29020832-29047961   | 23.8108  | 23.8655  | 0.0033  | 0.972745 |
| <i>Usp21</i>      | chr1:171281944-171287991  | 6.0472   | 6.0647   | 0.0042  | 0.951115 |
| <i>Atg12</i>      | chr18:46732416-46741579   | 24.1601  | 24.1929  | 0.0020  | 0.975744 |
| <i>Dph7</i>       | chr2:24962399-24972163    | 14.9641  | 14.9888  | 0.0024  | 0.973286 |
| <i>Pmpca</i>      | chr2:26389338-26397122    | 25.4055  | 25.9522  | 0.0307  | 0.398795 |
| <i>Crat</i>       | chr2:30400470-30415813    | 1.5020   | 1.5616   | 0.0562  | 0.700957 |
| <i>Fubp3</i>      | chr2:31572650-31617526    | 7.7396   | 7.7459   | 0.0012  | 0.988872 |
| <i>Nat10</i>      | chr2:103721255-103761270  | 10.2053  | 10.2441  | 0.0055  | 0.939889 |
| <i>Wdr76</i>      | chr2:121506722-121544860  | 5.8147   | 5.8241   | 0.0023  | 0.965961 |
| <i>Dnajc19</i>    | chr3:34056019-34081321    | 10.2046  | 10.4569  | 0.0352  | 0.652860 |
| <i>Rapgef4os2</i> | chr2:72224687-72232302    | 4.8314   | 4.8059   | -0.0076 | 0.963761 |
| <i>Slc35b4</i>    | chr6:34153379-34177111    | 4.5691   | 4.6884   | 0.0372  | 0.611180 |



|               |                           |         |         |         |          |
|---------------|---------------------------|---------|---------|---------|----------|
| 311000122Rik  | chr16:13671928-13678405   | 11.2162 | 11.1874 | -0.0037 | 0.975022 |
| Abi1          | chr2:22940072-23040241    | 48.7507 | 48.8239 | 0.0022  | 0.979907 |
| Acp2          | chr2:91202884-91214098    | 14.7840 | 15.1113 | 0.0316  | 0.509190 |
| Ccdc59        | chr10:105841066-105847833 | 15.1894 | 15.2026 | 0.0013  | 0.987338 |
| Cul5          | chr9:53614581-53670014    | 14.1338 | 14.1842 | 0.0051  | 0.924855 |
| Arhgap18      | chr10:26753420-26918648   | 7.4419  | 7.3890  | -0.0103 | 0.952466 |
| Helq          | chr5:100762144-100798598  | 5.7580  | 5.9048  | 0.0363  | 0.537470 |
| Sec16a        | chr2:26409430-26445216    | 30.9703 | 31.7913 | 0.0377  | 0.743909 |
| Spred1        | chr2:117121373-117182279  | 2.8187  | 2.8107  | -0.0041 | 0.964427 |
| Nprl3         | chr11:32225627-32267707   | 8.2058  | 8.4156  | 0.0364  | 0.690711 |
| Nt5c          | chr11:115490419-115491862 | 84.4637 | 84.5391 | 0.0013  | 0.989221 |
| Itpr2         | chr6:146108298-146502223  | 43.3088 | 44.3989 | 0.0359  | 0.715749 |
| Cog4          | chr8:110846599-110882227  | 16.8885 | 16.9488 | 0.0051  | 0.915555 |
| Sf1           | chr19:6363689-6378030     | 40.3546 | 41.3744 | 0.0360  | 0.703317 |
| Gm24452       | chr19:8724530-8724602     | 84.0086 | 87.5520 | 0.0596  | 0.580335 |
| Tshz1         | chr18:84011626-84086404   | 14.1814 | 14.5193 | 0.0340  | 0.574353 |
| Rnf146        | chr10:29344177-29362442   | 24.1503 | 24.2474 | 0.0058  | 0.906844 |
| Gcn1l1        | chr5:115565253-115622656  | 12.8978 | 12.9295 | 0.0035  | 0.974715 |
| Wdr91         | chr6:34880425-34910876    | 13.4764 | 13.8131 | 0.0356  | 0.652558 |
| Tm7sf3        | chr6:146602351-146642824  | 7.2840  | 7.4803  | 0.0384  | 0.738907 |
| Echdc1        | chr10:29313165-29346661   | 14.2265 | 14.5769 | 0.0351  | 0.693804 |
| 9230112E08Rik | chr2:180984231-180985591  | 7.2374  | 7.4902  | 0.0495  | 0.690341 |
| Nr2c1         | chr10:94148022-94197211   | 3.4146  | 3.5208  | 0.0442  | 0.697469 |
| Wdr86         | chr5:24711737-24730727    | 0.7977  | 0.8352  | 0.0663  | 0.716166 |
| Chchd2        | chr5:129881155-129887470  | 19.0164 | 19.5861 | 0.0426  | 0.798273 |
| D930028M14Rik | chr7:25152456-25156623    | 6.3678  | 6.6005  | 0.0518  | 0.808616 |
| Eif3f         | chr7:108934416-108942951  | 82.3959 | 82.6745 | 0.0049  | 0.952540 |
| Letm2         | chr8:25578491-25597487    | 10.2013 | 10.5048 | 0.0423  | 0.739939 |
| Rpl29         | chr9:106429453-106431568  | 18.4319 | 18.2788 | -0.0120 | 0.951084 |
| Slc25a46      | chr18:31580167-31609902   | 19.1592 | 19.1257 | -0.0025 | 0.983773 |
| Gpank1        | chr17:35121454-35124814   | 15.8936 | 15.8915 | -0.0002 | 0.998542 |
| Bahd1         | chr2:118900376-118924528  | 9.9794  | 10.0004 | 0.0030  | 0.977495 |
| Med23         | chr10:24869985-24913681   | 14.2044 | 14.2800 | 0.0077  | 0.815369 |
| Themis        | chr10:28668359-28883818   | 37.7976 | 37.8712 | 0.0028  | 0.976476 |
| Foxo3         | chr10:42181840-42276755   | 18.1585 | 18.6214 | 0.0363  | 0.720254 |
| Oxid1         | chr11:120456605-120458068 | 5.8789  | 6.0830  | 0.0492  | 0.752646 |
| Prkch         | chr12:73584796-73778185   | 92.3640 | 94.4579 | 0.0323  | 0.709224 |
| Pcbd2         | chr13:55727367-55776830   | 16.8931 | 16.7501 | -0.0123 | 0.940850 |
| Hnrmpk        | chr13:58391141-58403343   | 62.6877 | 64.0459 | 0.0309  | 0.615719 |
| Zfp874b       | chr13:67471513-67484225   | 16.5151 | 16.4834 | -0.0028 | 0.982968 |
| Ap3b1         | chr13:94358959-94566316   | 32.2438 | 32.9771 | 0.0324  | 0.552781 |
| Cad           | chr5:31054779-31078479    | 8.9600  | 8.9698  | 0.0016  | 0.990642 |
| Snx17         | chr5:31193226-31198900    | 31.8291 | 31.9652 | 0.0062  | 0.894856 |
| Fam220a       | chr5:143548707-143564531  | 5.9435  | 5.9351  | -0.0020 | 0.981641 |
| Zfp282        | chr6:47877203-47908485    | 4.9726  | 4.9808  | 0.0024  | 0.980688 |
| 9630033F20Rik | chr6:127085115-127109550  | 5.7373  | 5.8832  | 0.0362  | 0.537424 |
| 8430419L09Rik | chr6:135197976-135244955  | 6.4817  | 6.5020  | 0.0045  | 0.962806 |
| Etnk1         | chr6:143167229-143208542  | 55.5382 | 56.7539 | 0.0312  | 0.626220 |
| Mrps35        | chr6:147042763-147070903  | 6.9044  | 7.0813  | 0.0365  | 0.689609 |
| Mark4         | chr7:19426074-19458494    | 7.7531  | 7.7224  | -0.0057 | 0.977684 |
| Cfap20        | chr8:95420251-95434869    | 18.0438 | 18.5040 | 0.0363  | 0.674158 |
| Piezo1        | chr8:122481697-122551329  | 8.9294  | 9.1812  | 0.0401  | 0.771599 |
| Gm26733       | chr9:20432759-20563282    | 16.3524 | 16.3798 | 0.0024  | 0.970762 |
| Ei24          | chr9:36779158-36797393    | 18.4873 | 18.5211 | 0.0026  | 0.973105 |
| Acsf4         | chrX:142317992-142390535  | 15.0273 | 15.0604 | 0.0032  | 0.973320 |
| Laptm4b       | chr15:34238025-34284295   | 2.2443  | 2.2051  | -0.0254 | 0.885789 |
| Ext1          | chr15:53064037-53346159   | 8.4996  | 8.6965  | 0.0330  | 0.593050 |
| Rnf139        | chr15:58889228-58902390   | 32.7377 | 33.5337 | 0.0347  | 0.744714 |
| Gm26518       | chr15:102455525-102483722 | 4.5917  | 4.5943  | 0.0008  | 0.992523 |
| Vmn2r96       | chr17:18581726-18598157   | 4.5530  | 4.7153  | 0.0505  | 0.823112 |
| Fahd1         | chr17:24848895-24850302   | 2.8836  | 2.8616  | -0.0111 | 0.926678 |
| Gm17251       | chr17:33759991-33761870   | 9.5968  | 9.5468  | -0.0075 | 0.946255 |
| Ddr1          | chr17:35681566-35704621   | 3.5537  | 3.6773  | 0.0493  | 0.794814 |
| Atf2          | chr17:79848391-79896123   | 9.6187  | 9.6333  | 0.0022  | 0.980792 |
| Zfp91         | chr19:12763659-12796126   | 18.5235 | 18.6201 | 0.0075  | 0.862883 |
| Atp6v1h       | chr1:5083172-5162549      | 28.6865 | 29.3829 | 0.0346  | 0.741684 |
| Als2          | chr1:59162925-59237231    | 5.2691  | 5.2825  | 0.0037  | 0.955054 |
| Lrrfp1        | chr1:90998726-91128944    | 68.0880 | 69.4935 | 0.0295  | 0.398836 |
| Gm24489       | chr1:161037600-161037681  | 84.5581 | 83.6162 | -0.0162 | 0.931621 |
| Nsun6         | chr2:14995130-15054884    | 3.9956  | 3.9919  | -0.0013 | 0.986208 |
| Sh2d3c        | chr2:32721054-32755512    | 17.0020 | 17.0717 | 0.0059  | 0.952369 |

|                      |                           |          |          |         |          |
|----------------------|---------------------------|----------|----------|---------|----------|
| <i>Snx5</i>          | chr2:144250122-144270906  | 56.4418  | 57.7357  | 0.0327  | 0.688079 |
| <i>Pcmdt2</i>        | chr2:181837853-181857461  | 38.0082  | 38.8461  | 0.0315  | 0.637529 |
| <i>Ubap2l</i>        | chr3:89999588-90052475    | 27.2059  | 27.8713  | 0.0349  | 0.694228 |
| <i>Rpl34</i>         | chr3:130726830-130730398  | 200.7484 | 197.3161 | -0.0249 | 0.914761 |
| <i>Mknk1</i>         | chr4:115839197-115879250  | 9.6640   | 9.9165   | 0.0372  | 0.615852 |
| <i>Uqcrh</i>         | chr4:116066964-116075071  | 110.7624 | 110.1250 | -0.0083 | 0.965713 |
| <i>Map7d1</i>        | chr4:126232166-126256343  | 8.6936   | 8.7078   | 0.0024  | 0.983303 |
| <i>Cetn2</i>         | chrX:72913531-72918411    | 19.5596  | 20.0820  | 0.0380  | 0.785898 |
| <i>Slc16a1</i>       | chr3:104638667-104658462  | 13.0607  | 13.0927  | 0.0035  | 0.964400 |
| <i>Zfp595</i>        | chr13:67312997-67332560   | 11.5646  | 11.6095  | 0.0056  | 0.914262 |
| <i>Lrp6</i>          | chr6:134446475-134566965  | 15.3912  | 15.7787  | 0.0359  | 0.703767 |
| <i>Arfp2</i>         | chr7:105634202-105640416  | 7.2078   | 7.3764   | 0.0334  | 0.643338 |
| <i>Ddhd2</i>         | chr8:25725323-25754280    | 15.7729  | 16.1386  | 0.0331  | 0.669188 |
| <i>Gm26448</i>       | chr9:120129350-120129553  | 316.9171 | 308.5045 | -0.0388 | 0.895739 |
| <i>Zfp97</i>         | chr17:17121414-17146831   | 2.4663   | 2.4308   | -0.0209 | 0.913429 |
| <i>Ppid</i>          | chr3:79591341-79603650    | 24.0350  | 24.1301  | 0.0057  | 0.924488 |
| <i>Sirt4</i>         | chr5:115478009-115484725  | 2.7632   | 2.7306   | -0.0171 | 0.928591 |
| <i>Mpp6</i>          | chr6:50110240-50198598    | 11.8822  | 12.1812  | 0.0359  | 0.711794 |
| <i>Accs2os</i>       | chr2:155547039-155556930  | 12.2785  | 12.2386  | -0.0047 | 0.965021 |
| <i>Bphl</i>          | chr13:34037640-34074074   | 12.0932  | 12.0420  | -0.0061 | 0.963120 |
| <i>1600014C10Rik</i> | chr7:38183216-38197568    | 24.1837  | 24.2307  | 0.0028  | 0.977090 |
| <i>Ppp1r3fos</i>     | chrX:7573599-7581015      | 2.5837   | 2.5770   | -0.0037 | 0.984737 |
| <i>Traj22</i>        | chr14:54197247-54197307   | 233.0910 | 232.4872 | -0.0037 | 0.976091 |
| <i>Clasp1</i>        | chr1:118389057-118609432  | 10.9378  | 11.2051  | 0.0348  | 0.672648 |
| <i>Rpl7a</i>         | chr2:26910763-26913318    | 30.4798  | 30.4720  | -0.0004 | 0.997586 |
| <i>1810037117Rik</i> | chr3:122924361-122926193  | 17.6032  | 18.1075  | 0.0408  | 0.783777 |
| <i>Ndufaf6</i>       | chr4:11051044-11076205    | 4.2872   | 4.2205   | -0.0226 | 0.905032 |
| <i>Ctns</i>          | chr11:73183595-73199042   | 5.3204   | 5.4713   | 0.0404  | 0.725577 |
| <i>Tada3</i>         | chr6:113366024-113377883  | 7.9866   | 8.0158   | 0.0053  | 0.925580 |
| <i>Ddx18</i>         | chr1:121553834-121567989  | 9.6606   | 9.9069   | 0.0363  | 0.552796 |
| <i>Psmc1</i>         | chr1:86064386-86139151    | 20.4003  | 20.8513  | 0.0315  | 0.617801 |
| <i>Fbxw5</i>         | chr2:25500749-25505471    | 18.3976  | 18.4566  | 0.0046  | 0.959709 |
| <i>Slc25a22</i>      | chr7:141429738-141437892  | 6.8419   | 6.8526   | 0.0023  | 0.987460 |
| <i>Exog</i>          | chr9:119444922-119465517  | 3.4328   | 3.5397   | 0.0442  | 0.699616 |
| <i>Gm11696</i>       | chr11:109354777-109363654 | 6.3199   | 6.3300   | 0.0023  | 0.980509 |
| <i>Gm5898</i>        | chr7:63542478-63544549    | 1.9178   | 2.0055   | 0.0646  | 0.790549 |
| <i>Arih2</i>         | chr9:108602941-108649380  | 21.3932  | 21.4916  | 0.0066  | 0.911602 |
| <i>Impad1</i>        | chr4:4762483-4793355      | 11.7577  | 11.7917  | 0.0042  | 0.957145 |
| <i>Mrpl54</i>        | chr10:81264712-81266934   | 37.7068  | 37.5660  | -0.0054 | 0.971687 |
| <i>Gm26740</i>       | chr10:22187012-22302835   | 49.2440  | 50.4354  | 0.0345  | 0.746110 |
| <i>Map3k14</i>       | chr11:103219761-103267472 | 16.0689  | 16.1475  | 0.0070  | 0.933250 |
| <i>Fam195b</i>       | chr11:120542887-120549727 | 24.5587  | 25.3049  | 0.0432  | 0.756928 |
| <i>Hist1h3e</i>      | chr13:23561533-23562369   | 33.4178  | 34.4501  | 0.0439  | 0.831346 |
| <i>Zfp94</i>         | chr7:24301703-24316666    | 2.9512   | 2.9487   | -0.0012 | 0.982300 |
| <i>Klhl26</i>        | chr8:70450227-70476943    | 6.1745   | 6.3464   | 0.0396  | 0.684337 |
| <i>Arrdc2</i>        | chr8:70835154-70839720    | 13.0606  | 13.0769  | 0.0018  | 0.987145 |
| <i>Katnb1</i>        | chr8:95081200-95099874    | 5.3782   | 5.3784   | 0.0001  | 0.999678 |
| <i>Msantd4</i>       | chr9:4383534-4386861      | 12.9775  | 13.2719  | 0.0324  | 0.675482 |
| <i>Ncapd3</i>        | chr9:27030174-27095311    | 36.1544  | 36.2940  | 0.0056  | 0.943150 |
| <i>Mtfmt</i>         | chr9:65435781-65453054    | 6.7756   | 6.7925   | 0.0036  | 0.944927 |
| <i>Ice2</i>          | chr9:69397905-69433122    | 8.9884   | 9.0241   | 0.0057  | 0.933037 |
| <i>Oxsr1</i>         | chr9:119238431-119322427  | 20.9906  | 21.0808  | 0.0062  | 0.923031 |
| <i>Trmt12</i>        | chr15:58872648-58876781   | 6.2566   | 6.4164   | 0.0364  | 0.765600 |
| <i>Ppp3cc</i>        | chr14:70217897-70289449   | 36.7000  | 36.7804  | 0.0032  | 0.976021 |
| <i>Vmac</i>          | chr17:56713931-56717699   | 7.6614   | 7.6488   | -0.0024 | 0.978959 |
| <i>Eij4a2</i>        | chr16:23107443-23114136   | 146.0267 | 149.2425 | 0.0314  | 0.684819 |
| <i>Tcirg1</i>        | chr19:3896049-3907133     | 12.2358  | 12.5178  | 0.0329  | 0.575274 |
| <i>Fbxw4</i>         | chr19:45578253-45660312   | 12.1876  | 12.5259  | 0.0395  | 0.765112 |
| <i>Stk25</i>         | chr1:93621901-93635722    | 31.0146  | 31.7366  | 0.0332  | 0.620461 |
| <i>Rapgef4</i>       | chr2:71981239-72257474    | 12.6028  | 12.6352  | 0.0037  | 0.971551 |
| <i>Ccdc32</i>        | chr2:119017778-119029393  | 5.9841   | 5.9429   | -0.0100 | 0.946027 |
| <i>Gm10762</i>       | chr2:128966592-128967725  | 9.3957   | 9.3486   | -0.0072 | 0.956300 |
| <i>Ccdc39</i>        | chr3:33812361-33844310    | 3.4353   | 3.5298   | 0.0391  | 0.682723 |
| <i>Bbs12</i>         | chr3:37312553-37321453    | 4.1799   | 4.3277   | 0.0501  | 0.855598 |
| <i>Sema4a</i>        | chr3:88435958-88461182    | 26.1049  | 26.7327  | 0.0343  | 0.675214 |
| <i>E130218I03Rik</i> | chr4:134243661-134245873  | 8.3750   | 8.6185   | 0.0413  | 0.741719 |
| <i>Dcaf17</i>        | chr2:71055327-71099142    | 5.7710   | 5.8982   | 0.0315  | 0.514462 |
| <i>Grina</i>         | chr15:76246806-76249904   | 30.2593  | 30.4004  | 0.0067  | 0.932744 |
| <i>Gm11715</i>       | chr11:107157407-107167150 | 8.6730   | 8.6006   | -0.0121 | 0.911462 |
| <i>Hsbp1</i>         | chr8:119344537-119348927  | 51.4918  | 52.8434  | 0.0374  | 0.793697 |
| <i>Mapkap1</i>       | chr2:34406770-34624950    | 17.6747  | 17.7786  | 0.0085  | 0.843847 |

|                      |                           |          |          |         |          |
|----------------------|---------------------------|----------|----------|---------|----------|
| <i>Psmid2</i>        | chr16:20651651-20663414   | 33.1392  | 33.8694  | 0.0314  | 0.626917 |
| <i>Actr5</i>         | chr2:158624887-158639211  | 11.8490  | 11.9073  | 0.0071  | 0.925492 |
| <i>Syncrip</i>       | chr9:88449728-88482574    | 29.0299  | 29.1739  | 0.0071  | 0.908842 |
| <i>Zfp946</i>        | chr17:22424221-22456689   | 1.1217   | 1.1671   | 0.0572  | 0.774731 |
| <i>Ogfod2</i>        | chr5:124112296-124115483  | 8.8732   | 9.1010   | 0.0366  | 0.593964 |
| <i>Dnajc1</i>        | chr2:18195653-18392830    | 11.3692  | 11.6228  | 0.0318  | 0.623840 |
| <i>Crif3</i>         | chr11:80046492-80080991   | 110.6151 | 110.9076 | 0.0038  | 0.969412 |
| <i>Pacs2</i>         | chr12:113014507-113074401 | 18.2814  | 18.7411  | 0.0358  | 0.712051 |
| <i>Mapk11</i>        | chr15:89142485-89149606   | 24.7964  | 24.8693  | 0.0042  | 0.964676 |
| <i>Zfp799</i>        | chr17:32815454-32822200   | 6.3834   | 6.5469   | 0.0365  | 0.708976 |
| <i>Zfp174</i>        | chr16:3847267-3858880     | 1.3760   | 1.3722   | -0.0041 | 0.975978 |
| <i>Rpp38</i>         | chr2:3328948-3332643      | 10.6885  | 11.0173  | 0.0437  | 0.786312 |
| <i>Zfp217</i>        | chr2:170108642-170148103  | 33.6306  | 33.8408  | 0.0090  | 0.890894 |
| <i>Taf4a</i>         | chr2:179912145-179976646  | 8.8385   | 9.0917   | 0.0407  | 0.753525 |
| <i>Gnai3</i>         | chr3:108107279-108146146  | 79.5695  | 79.8149  | 0.0044  | 0.960008 |
| <i>Mrvi1</i>         | chr7:110868265-110982461  | 0.6438   | 0.6714   | 0.0606  | 0.720667 |
| <i>Ehmt1</i>         | chr2:24790768-24919609    | 14.7990  | 14.8821  | 0.0081  | 0.899138 |
| <i>Dyx1c1</i>        | chr9:72958784-72973064    | 2.4582   | 2.5478   | 0.0517  | 0.693400 |
| <i>Slc23a2</i>       | chr2:132052495-132145108  | 8.6046   | 8.8210   | 0.0358  | 0.708398 |
| <i>Xpot</i>          | chr10:121587379-121626316 | 10.2663  | 10.3213  | 0.0077  | 0.902372 |
| <i>Gpx3</i>          | chr11:54902452-54910377   | 2.3747   | 2.3489   | -0.0158 | 0.957393 |
| <i>Nelfa</i>         | chr5:33896935-33936413    | 9.2104   | 9.4180   | 0.0322  | 0.265462 |
| <i>Zfp420</i>        | chr7:29859978-29877292    | 4.1828   | 4.1801   | -0.0009 | 0.990590 |
| <i>Haus7</i>         | chrX:73437314-73459044    | 11.5960  | 11.8958  | 0.0368  | 0.576967 |
| <i>Mospd2</i>        | chrX:164936168-164980375  | 2.7954   | 2.7945   | -0.0005 | 0.994491 |
| <i>Cyb5r3</i>        | chr15:83153493-83172592   | 9.2584   | 9.5131   | 0.0392  | 0.813830 |
| <i>Hmox2</i>         | chr16:4726360-4766742     | 30.4725  | 31.2174  | 0.0348  | 0.758324 |
| <i>Ints5</i>         | chr19:8892986-8897890     | 10.4958  | 10.7551  | 0.0352  | 0.610989 |
| <i>Esco1</i>         | chr18:10566601-10610352   | 34.9754  | 35.0747  | 0.0041  | 0.965200 |
| <i>Pnpla7</i>        | chr2:24976032-25054057    | 20.7247  | 21.1800  | 0.0314  | 0.671520 |
| <i>Gm27027</i>       | chr2:93956816-93996354    | 9.0714   | 9.4012   | 0.0515  | 0.745861 |
| <i>Hipk3</i>         | chr2:104426480-104494446  | 25.9787  | 26.5488  | 0.0313  | 0.658676 |
| <i>Cables2</i>       | chr2:180258539-180273496  | 11.5246  | 11.8055  | 0.0348  | 0.700799 |
| <i>Samd10</i>        | chr2:181595217-181599212  | 6.4791   | 6.6663   | 0.0411  | 0.704604 |
| <i>Rnf11</i>         | chr4:109451097-109484728  | 6.9444   | 6.9217   | -0.0047 | 0.974264 |
| <i>Frbp4</i>         | chr2:90745369-90781021    | 42.9042  | 43.8158  | 0.0303  | 0.673554 |
| <i>Camkk1</i>        | chr11:73019007-73042073   | 2.1525   | 2.2281   | 0.0499  | 0.798487 |
| <i>Smurf1</i>        | chr5:144876494-144965847  | 15.3746  | 15.4765  | 0.0095  | 0.873200 |
| <i>Dok1</i>          | chr6:83030933-83033471    | 11.8224  | 12.1037  | 0.0339  | 0.649556 |
| <i>Cml1</i>          | chr6:85910153-85915687    | 4.9178   | 4.8524   | -0.0193 | 0.932452 |
| <i>Tma16</i>         | chr8:66474329-66486530    | 2.9038   | 2.9851   | 0.0398  | 0.651909 |
| <i>Clic1</i>         | chr17:35049965-35058749   | 108.8090 | 111.2245 | 0.0317  | 0.696010 |
| <i>Shhg3</i>         | chr4:132348013-132353686  | 428.0043 | 450.9231 | 0.0753  | 0.838713 |
| <i>4833439L19Rik</i> | chr13:54551217-54565435   | 12.1652  | 12.2242  | 0.0070  | 0.869744 |
| <i>Sult2b1</i>       | chr7:45729982-45759612    | 2.6120   | 2.5951   | -0.0094 | 0.932234 |
| <i>Aifm1</i>         | chrX:48474943-48513563    | 8.2567   | 8.4506   | 0.0335  | 0.546991 |
| <i>Zfp239</i>        | chr6:117862099-117873291  | 0.9515   | 0.9316   | -0.0305 | 0.923940 |
| <i>Med12</i>         | chrX:101274029-101297465  | 27.8787  | 28.0137  | 0.0070  | 0.946751 |
| <i>H3f3a</i>         | chr1:180800831-180813943  | 13.0706  | 13.0270  | -0.0048 | 0.977905 |
| <i>Sra1</i>          | chr18:36666680-36671196   | 21.0845  | 21.1129  | 0.0019  | 0.983466 |
| <i>Lysmd1</i>        | chr3:95134087-95139518    | 4.8903   | 5.0133   | 0.0358  | 0.578429 |
| <i>Orm2</i>          | chr4:63362448-63365878    | 9.3831   | 9.7676   | 0.0579  | 0.821185 |
| <i>Taf1b</i>         | chr12:24498580-24558571   | 25.6590  | 26.2313  | 0.0318  | 0.723744 |
| <i>Rps25</i>         | chr9:44407713-44410405    | 30.7603  | 31.6233  | 0.0399  | 0.845591 |
| <i>Commd5</i>        | chr15:76899909-76901305   | 11.2716  | 11.6010  | 0.0416  | 0.789039 |
| <i>Mtf1</i>          | chr4:124802103-124849800  | 4.4457   | 4.4628   | 0.0055  | 0.954771 |
| <i>Z310067B10Rik</i> | chr11:115765432-115799366 | 8.9914   | 9.0262   | 0.0056  | 0.962828 |
| <i>Emid1</i>         | chr11:5106264-5152257     | 1.6845   | 1.7485   | 0.0538  | 0.778283 |
| <i>Lmna</i>          | chr3:88481147-88509956    | 2.3766   | 2.3637   | -0.0079 | 0.972517 |
| <i>Bloc1s5</i>       | chr13:38602708-38635109   | 6.5188   | 6.4757   | -0.0096 | 0.945867 |
| <i>Nudcd2</i>        | chr11:40733666-40740046   | 13.0767  | 13.0597  | -0.0019 | 0.987493 |
| <i>Nek8</i>          | chr11:78166105-78176675   | 2.2244   | 2.2875   | 0.0403  | 0.595731 |
| <i>NA</i>            | chr5:143548705-143564525  | 5.8633   | 6.0193   | 0.0379  | 0.686950 |
| <i>Rbm28</i>         | chr6:29123572-29165006    | 15.2752  | 15.6119  | 0.0315  | 0.632929 |
| <i>Vopp1</i>         | chr6:57727806-57825154    | 5.3453   | 5.4690   | 0.0330  | 0.747643 |
| <i>Itpr1</i>         | chr6:108213117-108551109  | 26.9525  | 27.5940  | 0.0339  | 0.760245 |
| <i>Gm7457</i>        | chr6:142814230-142833494  | 1.3802   | 1.4308   | 0.0519  | 0.725002 |
| <i>Akip1</i>         | chr7:109703689-109712189  | 7.5745   | 7.8197   | 0.0460  | 0.822297 |
| <i>Pgm3</i>          | chr9:86552475-86571842    | 10.3590  | 10.6011  | 0.0333  | 0.631311 |
| <i>Pkd1</i>          | chr17:24549949-24596514   | 16.8508  | 17.3303  | 0.0405  | 0.819545 |
| <i>Rab29</i>         | chr1:131867223-131872887  | 18.5319  | 18.5490  | 0.0013  | 0.983375 |

|                      |                           |           |           |         |          |
|----------------------|---------------------------|-----------|-----------|---------|----------|
| <i>Cstf3</i>         | chr2:104590522-104665429  | 6.2292    | 6.3837    | 0.0354  | 0.706153 |
| <i>9830144P21Rik</i> | chr2:129205957-129230579  | 9.1485    | 9.1733    | 0.0039  | 0.968170 |
| <i>Phf20</i>         | chr2:156196465-156309952  | 6.7836    | 6.9255    | 0.0298  | 0.355448 |
| <i>Dbnnd2</i>        | chr2:164486105-164493319  | 1.1618    | 1.2092    | 0.0576  | 0.758809 |
| <i>Rad54l</i>        | chr4:116094263-116123690  | 2.3876    | 2.3904    | 0.0017  | 0.991091 |
| <i>Clasrp</i>        | chr7:19581043-19604468    | 22.7867   | 23.3577   | 0.0357  | 0.698683 |
| <i>St3gal2</i>       | chr8:110919921-110972480  | 3.6503    | 3.7430    | 0.0362  | 0.676277 |
| <i>Nik</i>           | chr11:78567167-78697373   | 29.3593   | 29.5762   | 0.0106  | 0.816764 |
| <i>Pde2a</i>         | chr7:101421690-101512829  | 14.3109   | 14.0603   | -0.0255 | 0.929906 |
| <i>Fbxo4</i>         | chr15:3965444-3979573     | 5.5190    | 5.4964    | -0.0059 | 0.951151 |
| <i>Zfyve26</i>       | chr12:79232346-79296282   | 9.0249    | 9.2558    | 0.0365  | 0.778402 |
| <i>Fbxo30</i>        | chr10:11281329-11298052   | 1.4210    | 1.4197    | -0.0013 | 0.990577 |
| <i>4930556J24Rik</i> | chr11:3937540-3976778     | 5.4932    | 5.6704    | 0.0458  | 0.667799 |
| <i>Camk2b</i>        | chr11:5969643-6066362     | 1.6907    | 1.7570    | 0.0555  | 0.868853 |
| <i>Aldh3a2</i>       | chr11:61223416-61267464   | 13.2372   | 13.3146   | 0.0084  | 0.814366 |
| <i>Arrb2</i>         | chr11:70432634-70440828   | 82.6547   | 83.2997   | 0.0112  | 0.742558 |
| <i>Gngt2</i>         | chr11:95837215-95845734   | 9.4375    | 9.4219    | -0.0024 | 0.983748 |
| <i>Stat5a</i>        | chr11:100859350-100885169 | 12.8553   | 12.9261   | 0.0079  | 0.926115 |
| <i>Nbas</i>          | chr12:13269126-13583810   | 11.7528   | 11.8151   | 0.0076  | 0.934942 |
| <i>Zfp87</i>         | chr13:67515780-67526177   | 14.5414   | 14.8675   | 0.0320  | 0.703553 |
| <i>Alkbh2</i>        | chr5:114123925-114128218  | 5.2280    | 5.2194    | -0.0024 | 0.986434 |
| <i>Krcc1</i>         | chr6:71272018-71285318    | 57.7494   | 57.8272   | 0.0019  | 0.986585 |
| <i>Cd9</i>           | chr6:125460265-125494791  | 14.5954   | 14.6075   | 0.0012  | 0.992168 |
| <i>Lrrc56</i>        | chr7:141194156-141210055  | 0.9569    | 0.9502    | -0.0102 | 0.918309 |
| <i>Vps35</i>         | chr8:85260396-85299513    | 42.5781   | 43.5379   | 0.0322  | 0.750879 |
| <i>9330175E14Rik</i> | chr8:94422898-94435105    | 11.9610   | 12.2609   | 0.0357  | 0.764079 |
| <i>1810008B01Rik</i> | chr8:124305131-124306507  | 10.4918   | 10.7673   | 0.0374  | 0.632890 |
| <i>Sprtn</i>         | chr8:124897885-124903813  | 19.3969   | 19.4735   | 0.0057  | 0.957944 |
| <i>Arhgef12</i>      | chr9:42963841-43105718    | 3.4842    | 3.5715    | 0.0357  | 0.758162 |
| <i>Cox7b</i>         | chrX:106015699-106022450  | 53.3857   | 54.8797   | 0.0398  | 0.827887 |
| <i>Celsr1</i>        | chr15:85898757-86033777   | 14.2191   | 14.6616   | 0.0442  | 0.852056 |
| <i>Snora78</i>       | chr17:24719675-24719803   | 77.4374   | 76.4782   | -0.0180 | 0.946640 |
| <i>Gm11110</i>       | chr17:57092034-57105942   | 4.5144    | 4.6655    | 0.0475  | 0.826031 |
| <i>Gspt1</i>         | chr16:11219291-11254270   | 23.0298   | 23.5137   | 0.0300  | 0.476688 |
| <i>Pcnx13</i>        | chr19:5664634-5688908     | 14.9233   | 14.9737   | 0.0049  | 0.973900 |
| <i>Rbbp8</i>         | chr18:11633275-11743207   | 7.1547    | 7.3157    | 0.0321  | 0.770328 |
| <i>Nabl</i>          | chr2:17343908-17731464    | 0.4390    | 0.4305    | -0.0282 | 0.937353 |
| <i>Cry2</i>          | chr2:92403645-92434043    | 3.4687    | 3.4777    | 0.0037  | 0.977481 |
| <i>Snora73a</i>      | chr4:132352774-132352979  | 1990.5272 | 2093.5914 | 0.0728  | 0.847827 |
| <i>9130020K20Rik</i> | chr4:136347285-136350334  | 4.3498    | 4.3501    | 0.0001  | 0.999473 |
| <i>Sec61g</i>        | chr11:16500529-16508484   | 2.1618    | 2.1431    | -0.0125 | 0.957516 |
| <i>Mfsd9</i>         | chr1:40772037-40790687    | 0.7732    | 0.8029    | 0.0544  | 0.763669 |
| <i>Ejf2a</i>         | chr3:58525820-58557501    | 11.8686   | 12.1238   | 0.0307  | 0.703014 |
| <i>Zfp938</i>        | chr10:82224849-82241280   | 6.6449    | 6.6078    | -0.0081 | 0.962131 |
| <i>Rhoq</i>          | chr17:86963081-87000069   | 2.8055    | 2.7995    | -0.0031 | 0.981347 |
| <i>Mov10</i>         | chr3:104794835-104818563  | 13.6881   | 13.7154   | 0.0029  | 0.986156 |
| <i>Cep89</i>         | chr7:35397034-35438689    | 1.5321    | 1.5812    | 0.0455  | 0.721253 |
| <i>Kif3b</i>         | chr2:153291412-153333390  | 16.9086   | 17.0112   | 0.0087  | 0.880151 |
| <i>Ikbkg</i>         | chrX:74393289-74453854    | 14.5121   | 14.8129   | 0.0296  | 0.663724 |
| <i>Osm</i>           | chr11:4236419-4241026     | 15.2362   | 15.6262   | 0.0365  | 0.754930 |
| <i>Tmc8</i>          | chr11:117782075-117793110 | 36.1004   | 36.9412   | 0.0332  | 0.732570 |
| <i>Mrp133</i>        | chr5:31596934-31701972    | 10.2931   | 10.3493   | 0.0078  | 0.888803 |
| <i>Lin7c</i>         | chr2:109890852-109901003  | 28.2063   | 28.2779   | 0.0037  | 0.972370 |
| <i>Gm10676</i>       | chr7:18989553-18992774    | 3.3880    | 3.4961    | 0.0453  | 0.762419 |
| <i>Gmppb</i>         | chr9:108049268-108052801  | 16.2147   | 16.3034   | 0.0079  | 0.923138 |
| <i>Gm11100</i>       | chr14:13918443-13949558   | 7.1471    | 7.3402    | 0.0385  | 0.797205 |
| <i>Gtf3c3</i>        | chr1:54397580-54438971    | 19.1501   | 19.5535   | 0.0301  | 0.665307 |
| <i>Reps1</i>         | chr10:18055860-18125155   | 16.8451   | 17.2034   | 0.0304  | 0.707173 |
| <i>Gm12264</i>       | chr11:59775285-59780321   | 16.0484   | 16.0156   | -0.0030 | 0.976826 |
| <i>Tbpl1</i>         | chr10:22703878-22731938   | 18.6093   | 19.0023   | 0.0301  | 0.686046 |
| <i>Crot</i>          | chr5:8966032-8997324      | 13.4800   | 13.7681   | 0.0305  | 0.750056 |
| <i>Spp13</i>         | chr5:115011136-115098790  | 9.7202    | 9.9722    | 0.0369  | 0.761063 |
| <i>Gtf2a2</i>        | chr9:70012549-70022866    | 18.5698   | 18.6095   | 0.0031  | 0.976406 |
| <i>Cyc1</i>          | chr15:76343522-76345934   | 41.0064   | 41.9073   | 0.0314  | 0.702263 |
| <i>Micu2</i>         | chr14:57916279-57999262   | 34.9037   | 35.0650   | 0.0067  | 0.932148 |
| <i>Senp5</i>         | chr16:31962505-32003287   | 9.2534    | 9.3113    | 0.0090  | 0.851727 |
| <i>Stk38</i>         | chr17:28970884-29007945   | 53.4913   | 54.5638   | 0.0286  | 0.654433 |
| <i>Polr3h</i>        | chr15:81915029-81926213   | 7.2014    | 7.2314    | 0.0060  | 0.938264 |
| <i>Tm9sf2</i>        | chr14:122107037-122159604 | 58.0537   | 59.2216   | 0.0287  | 0.673113 |
| <i>Net1</i>          | chr13:3882564-3918220     | 8.3829    | 8.5719    | 0.0322  | 0.687635 |
| <i>Gimap1os</i>      | chr6:48738345-48740621    | 48.8164   | 48.9575   | 0.0042  | 0.968959 |

|                      |                           |           |           |         |          |
|----------------------|---------------------------|-----------|-----------|---------|----------|
| <i>Psmc4</i>         | chr7:28041706-28050101    | 47.0842   | 47.3238   | 0.0073  | 0.911414 |
| <i>Maged2</i>        | chrX:150806369-150814345  | 1.3131    | 1.3553    | 0.0456  | 0.836172 |
| <i>9430016H08Rik</i> | chr1:57406327-57417953    | 3.9762    | 4.0819    | 0.0379  | 0.694271 |
| <i>Gas5</i>          | chr1:161034421-161038539  | 100.9342  | 101.4599  | 0.0075  | 0.920797 |
| <i>Haus1</i>         | chr18:77757566-77767780   | 18.6629   | 19.1590   | 0.0378  | 0.803908 |
| <i>Fchsdl</i>        | chr18:37957430-37969774   | 6.6669    | 6.8311    | 0.0351  | 0.702775 |
| <i>Gm11766</i>       | chr11:119938510-119942074 | 1.8540    | 1.9279    | 0.0564  | 0.836446 |
| <i>Cipc</i>          | chr12:86947342-86965362   | 8.0036    | 8.0492    | 0.0082  | 0.811510 |
| <i>Arhgap10</i>      | chr8:77250365-77517907    | 10.7940   | 11.0483   | 0.0336  | 0.662736 |
| <i>Coa6</i>          | chr8:126422500-126425434  | 14.5091   | 14.8827   | 0.0367  | 0.726717 |
| <i>Ube2q2</i>        | chr9:55148853-55207529    | 7.4394    | 7.4497    | 0.0020  | 0.985091 |
| <i>Gm16618</i>       | chr16:20511132-20517766   | 4.2052    | 4.1624    | -0.0148 | 0.911310 |
| <i>Mms19</i>         | chr19:41941085-41981157   | 15.1475   | 15.2688   | 0.0115  | 0.805819 |
| <i>Dip2a</i>         | chr10:76259428-76345291   | 1.7971    | 1.8496    | 0.0416  | 0.832169 |
| <i>Pgpep1</i>        | chr8:70646435-70659738    | 0.8221    | 0.8579    | 0.0614  | 0.808965 |
| <i>Gm14798</i>       | chrX:94028853-94099304    | 10.6195   | 10.9097   | 0.0389  | 0.793212 |
| <i>Rps24</i>         | chr14:24490680-24496146   | 837.8575  | 829.0848  | -0.0152 | 0.947350 |
| <i>Spcs1</i>         | chr14:30999825-31001672   | 26.2197   | 26.2158   | -0.0002 | 0.998775 |
| <i>Tbc1d5</i>        | chr17:50733126-51179349   | 6.8131    | 6.9635    | 0.0315  | 0.648316 |
| <i>Cln2</i>          | chr16:20702963-20717746   | 0.8336    | 0.8657    | 0.0544  | 0.788921 |
| <i>Tceb3</i>         | chr4:136003367-136021763  | 23.7411   | 23.8737   | 0.0080  | 0.908679 |
| <i>Gm21987</i>       | chr16:38347039-38362297   | 25.0489   | 24.9349   | -0.0066 | 0.966839 |
| <i>Pus7</i>          | chr5:23740647-23783711    | 4.9073    | 5.0267    | 0.0347  | 0.781227 |
| <i>Pomp</i>          | chr5:147860627-147875778  | 64.4500   | 66.0315   | 0.0350  | 0.796635 |
| <i>Htatip2</i>       | chr7:49759105-49773999    | 10.0845   | 10.3817   | 0.0419  | 0.761003 |
| <i>Trappc2</i>       | chrX:166440573-166453140  | 2.0536    | 2.0502    | -0.0024 | 0.984143 |
| <i>Dyrk1a</i>        | chr16:94570009-94695517   | 28.0567   | 28.6105   | 0.0282  | 0.583804 |
| <i>Ctsz</i>          | chr2:174427492-174439039  | 24.1976   | 24.2048   | 0.0004  | 0.997646 |
| <i>Mrpl53</i>        | chr6:83109094-83109939    | 19.9478   | 19.9273   | -0.0015 | 0.989271 |
| <i>Ube2w</i>         | chr1:16540789-16619489    | 5.3567    | 5.4901    | 0.0355  | 0.837658 |
| <i>Emc2</i>          | chr15:43477228-43527777   | 35.6484   | 35.6445   | -0.0002 | 0.999107 |
| <i>Tcp11l2</i>       | chr10:84576625-84614359   | 32.0165   | 32.1881   | 0.0077  | 0.916447 |
| <i>Chek2</i>         | chr5:110840016-110874133  | 2.5576    | 2.6389    | 0.0451  | 0.821052 |
| <i>Pnpla6</i>        | chr8:3515383-3544266      | 9.8160    | 9.8607    | 0.0066  | 0.960949 |
| <i>Cdkn2aip</i>      | chr8:47709343-477113931   | 17.2266   | 17.5728   | 0.0287  | 0.626602 |
| <i>Acd</i>           | chr8:105698158-105701095  | 12.9478   | 13.0145   | 0.0074  | 0.930329 |
| <i>Tcta</i>          | chr9:108302958-108305951  | 11.9672   | 12.2609   | 0.0350  | 0.769460 |
| <i>Gm9938</i>        | chr19:23723278-23725034   | 13.5560   | 13.5785   | 0.0024  | 0.981392 |
| <i>Xpnppe1</i>       | chr19:52943416-53040214   | 6.0108    | 6.1394    | 0.0305  | 0.504554 |
| <i>Nhlrc2</i>        | chr19:56548260-56598846   | 14.0511   | 14.3474   | 0.0301  | 0.596498 |
| <i>Stat4</i>         | chr1:51987147-52107188    | 60.4419   | 60.7265   | 0.0068  | 0.938081 |
| <i>Eij2d</i>         | chr1:131153180-131187658  | 13.4915   | 13.7663   | 0.0291  | 0.646997 |
| <i>Pdix</i>          | chr2:103021074-103073513  | 5.6794    | 5.6851    | 0.0015  | 0.988094 |
| <i>mt-Co1</i>        | chrM:5327-6872            | 3017.4124 | 3033.9073 | 0.0079  | 0.922840 |
| <i>Lias</i>          | chr5:65391496-65410693    | 7.6780    | 7.8409    | 0.0303  | 0.707244 |
| <i>Itfg2</i>         | chr6:128409443-128424931  | 4.6418    | 4.6596    | 0.0055  | 0.971208 |
| <i>Ufsp2</i>         | chr8:45975527-45996958    | 11.5887   | 11.6204   | 0.0039  | 0.956316 |
| <i>Scyl2</i>         | chr10:89638720-89686285   | 9.8250    | 9.8839    | 0.0086  | 0.880599 |
| <i>Tulp4</i>         | chr17:6106436-6251128     | 4.5102    | 4.6108    | 0.0318  | 0.678580 |
| <i>Vps41</i>         | chr13:18717291-18866809   | 33.6730   | 34.3192   | 0.0274  | 0.604433 |
| <i>Rdm1</i>          | chr11:101627194-101636100 | 8.3557    | 8.3661    | 0.0018  | 0.983334 |
| <i>Zfp85</i>         | chr13:67747799-67755228   | 8.9667    | 9.1680    | 0.0320  | 0.708348 |
| <i>Raf1</i>          | chr6:115618066-115676635  | 41.7211   | 41.9834   | 0.0090  | 0.912577 |
| <i>Ammecr1l</i>      | chr18:31759823-31784071   | 11.3377   | 11.4040   | 0.0084  | 0.918102 |
| <i>Nop56</i>         | chr2:130274429-130279313  | 32.5212   | 33.1796   | 0.0289  | 0.514080 |
| <i>Rapgef2</i>       | chr3:79062515-79181340    | 9.9932    | 10.0722   | 0.0114  | 0.736843 |
| <i>Ranbp2</i>        | chr10:58446851-58494155   | 72.5356   | 73.9754   | 0.0284  | 0.683578 |
| <i>Poc1b</i>         | chr10:99107035-99198074   | 5.4974    | 5.6532    | 0.0403  | 0.812578 |
| <i>9330160F10Rik</i> | chr11:69057717-69060483   | 4.4164    | 4.5331    | 0.0376  | 0.815095 |
| <i>Osbpl7</i>        | chr11:97050627-97068904   | 7.3349    | 7.5124    | 0.0345  | 0.704424 |
| <i>2610035D17Rik</i> | chr11:113043894-113201838 | 10.1952   | 10.2444   | 0.0070  | 0.942143 |
| <i>Zfp277</i>        | chr12:40315045-40445790   | 13.7439   | 13.7702   | 0.0028  | 0.976437 |
| <i>Rheb</i>          | chr5:24802822-24842624    | 9.4750    | 9.6773    | 0.0305  | 0.697752 |
| <i>Tufm</i>          | chr7:126487354-126490730  | 3.9947    | 4.1132    | 0.0422  | 0.542730 |
| <i>Doc2a</i>         | chr7:126847415-126852705  | 4.6770    | 4.7932    | 0.0354  | 0.706834 |
| <i>Unc13a</i>        | chr8:71624416-71671757    | 1.5703    | 1.5734    | 0.0028  | 0.988789 |
| <i>Plp1</i>          | chrX:136822670-136839733  | 1.0790    | 1.0782    | -0.0011 | 0.992703 |
| <i>Fam199x</i>       | chrX:137049593-137082503  | 5.3870    | 5.5088    | 0.0323  | 0.748882 |
| <i>Extl3</i>         | chr14:65052059-65098106   | 13.9515   | 14.2713   | 0.0327  | 0.724231 |
| <i>1600002H07Rik</i> | chr17:24215053-24220851   | 3.1096    | 3.0902    | -0.0090 | 0.949778 |
| <i>Znrd1</i>         | chr17:36954357-36958559   | 31.9274   | 32.7354   | 0.0361  | 0.828624 |

|                      |                           |          |          |         |          |
|----------------------|---------------------------|----------|----------|---------|----------|
| <i>Mrps10</i>        | chr17:47368886-47381417   | 4.7204   | 4.7467   | 0.0080  | 0.923366 |
| <i>Srsf7</i>         | chr17:80200088-80207305   | 76.8313  | 77.3815  | 0.0103  | 0.853857 |
| <i>Txndc11</i>       | chr16:11074910-11134650   | 7.6547   | 7.7065   | 0.0097  | 0.910541 |
| <i>Rnf2</i>          | chr1:151469405-151500823  | 37.4366  | 37.5260  | 0.0034  | 0.977934 |
| <i>Zfp335</i>        | chr2:164891881-164911757  | 21.9230  | 22.4512  | 0.0343  | 0.760190 |
| <i>Fmo5</i>          | chr3:97628803-97655282    | 1.6349   | 1.6883   | 0.0463  | 0.788113 |
| <i>Rnf19b</i>        | chr4:129058270-129085886  | 19.2895  | 19.3376  | 0.0036  | 0.978959 |
| <i>Stx12</i>         | chr4:132853500-132884509  | 10.5568  | 10.7869  | 0.0311  | 0.739319 |
| <i>Gskip</i>         | chr12:105685351-105703047 | 8.9530   | 8.9790   | 0.0042  | 0.964154 |
| <i>Gpi1</i>          | chr7:34202121-34230289    | 46.4627  | 46.7270  | 0.0082  | 0.931438 |
| <i>4632427E13Rik</i> | chr7:92734165-92741468    | 20.0444  | 20.4783  | 0.0309  | 0.788837 |
| <i>Tiparp</i>        | chr3:65528409-65555145    | 10.5222  | 10.5833  | 0.0084  | 0.842557 |
| <i>Ublcp1</i>        | chr11:44454570-44470498   | 4.5796   | 4.5591   | -0.0065 | 0.964653 |
| <i>Nsdhl</i>         | chrX:72918556-72958514    | 4.4104   | 4.5446   | 0.0433  | 0.774893 |
| <i>Slc10a1</i>       | chr12:80953184-80968079   | 7.4595   | 7.6599   | 0.0382  | 0.785916 |
| <i>Zscan25</i>       | chr5:145283342-145291469  | 11.6212  | 11.8898  | 0.0330  | 0.549884 |
| <i>Zfp593</i>        | chr4:134243288-134245592  | 9.3081   | 9.5447   | 0.0362  | 0.780417 |
| <i>Wdr37</i>         | chr13:8802967-8871909     | 13.2847  | 13.3871  | 0.0111  | 0.841546 |
| <i>Galnt3</i>        | chr5:110544344-110621382  | 2.1200   | 2.1880   | 0.0456  | 0.839001 |
| <i>S100a10</i>       | chr3:93555079-93564643    | 141.9365 | 145.4283 | 0.0351  | 0.845744 |
| <i>Chfr</i>          | chr5:110135839-110171972  | 36.2206  | 36.4865  | 0.0106  | 0.845395 |
| <i>Gm16982</i>       | chr7:141610065-141613747  | 6.2154   | 6.2427   | 0.0063  | 0.942330 |
| <i>Ipo9</i>          | chr1:135382311-135430499  | 13.1083  | 13.3820  | 0.0298  | 0.643406 |
| <i>Mpp7</i>          | chr18:7347961-7626863     | 2.8799   | 2.8759   | -0.0020 | 0.987454 |
| <i>Serf2</i>         | chr2:121449194-121458313  | 22.9957  | 23.4731  | 0.0296  | 0.692210 |
| <i>Lmbr1l</i>        | chr15:98903920-98918231   | 29.9754  | 30.6013  | 0.0298  | 0.732857 |
| <i>Gm15492</i>       | chr6:113308665-113326747  | 8.3920   | 8.6970   | 0.0515  | 0.828010 |
| <i>Abcb10</i>        | chr8:123952458-123983122  | 1.5407   | 1.5786   | 0.0351  | 0.834935 |
| <i>Dnaja4</i>        | chr9:54698872-54716315    | 2.0970   | 2.1671   | 0.0474  | 0.852058 |
| <i>NA</i>            | chr11:76179670-76214816   | 7.2173   | 7.3932   | 0.0347  | 0.697008 |
| <i>Erich1</i>        | chr8:14027564-14090327    | 12.3161  | 12.3586  | 0.0050  | 0.958242 |
| <i>Slc16a4</i>       | chr3:107291229-107312115  | 2.0220   | 2.0231   | 0.0008  | 0.995631 |
| <i>Ptger4</i>        | chr15:5206660-5244187     | 12.3787  | 12.4456  | 0.0078  | 0.940215 |
| <i>Pitpna</i>        | chr11:75588096-75628804   | 47.2661  | 48.2618  | 0.0301  | 0.726022 |
| <i>Gm20499</i>       | chr5:114809035-114823460  | 13.1332  | 13.1328  | 0.0000  | 0.999624 |
| <i>Mtpn</i>          | chr6:35508905-35539888    | 45.5273  | 46.4424  | 0.0287  | 0.736429 |
| <i>Trbv2</i>         | chr6:41047555-41047995    | 104.7281 | 107.0456 | 0.0316  | 0.797214 |
| <i>Zfp467</i>        | chr6:48427696-48445825    | 3.0790   | 3.0949   | 0.0074  | 0.948973 |
| <i>Gm15135</i>       | chr7:104261464-104262174  | 53.3252  | 53.4674  | 0.0038  | 0.973496 |
| <i>Rplp2</i>         | chr7:141447369-141451585  | 114.9152 | 114.1803 | -0.0093 | 0.967654 |
| <i>Zswim8</i>        | chr14:20707551-20723618   | 20.3692  | 20.8280  | 0.0321  | 0.782371 |
| <i>Lactb2</i>        | chr1:13624844-13660546    | 11.0209  | 11.2672  | 0.0319  | 0.806877 |
| <i>Rabif</i>         | chr1:134494659-134507882  | 24.3577  | 24.4568  | 0.0059  | 0.954745 |
| <i>Accs</i>          | chr2:93833466-93849943    | 3.7619   | 3.8497   | 0.0333  | 0.784882 |
| <i>Ndufaf1</i>       | chr2:119655445-119662827  | 11.7899  | 12.0485  | 0.0313  | 0.815071 |
| <i>Snx21</i>         | chr2:164785822-164793816  | 3.4015   | 3.4877   | 0.0361  | 0.728748 |
| <i>Atp5e</i>         | chr2:174461071-174464105  | 31.3408  | 32.1782  | 0.0380  | 0.860282 |
| <i>Ccrn4l</i>        | chr3:51224446-51251644    | 2.0253   | 2.0338   | 0.0060  | 0.964932 |
| <i>Aldh1b1</i>       | chr4:45799021-45804604    | 3.7635   | 3.8601   | 0.0365  | 0.613069 |
| <i>Rnu11</i>         | chr4:132270079-132270213  | 68.9484  | 67.9203  | -0.0217 | 0.950439 |
| <i>Dffa</i>          | chr4:149104145-149120647  | 9.6041   | 9.6707   | 0.0100  | 0.868660 |
| <i>Pgd</i>           | chr4:149149990-149166771  | 6.1734   | 6.2117   | 0.0089  | 0.913965 |
| <i>Smim1</i>         | chr4:154020469-154026230  | 2.6849   | 2.7639   | 0.0418  | 0.796897 |
| <i>Rpl9</i>          | chr5:65388363-65391443    | 13.3170  | 13.3976  | 0.0087  | 0.904842 |
| <i>Numa1</i>         | chr7:101969842-102014959  | 90.2432  | 91.0082  | 0.0122  | 0.845004 |
| <i>Rbbp9</i>         | chr2:144542264-144550869  | 3.9172   | 4.0131   | 0.0349  | 0.814436 |
| <i>Trove2</i>        | chr1:143750789-143777068  | 2.0885   | 2.0977   | 0.0064  | 0.910974 |
| <i>Athl1</i>         | chr7:140941390-140947664  | 12.5364  | 12.6174  | 0.0093  | 0.906686 |
| <i>Smim15</i>        | chr13:108046423-108049146 | 50.4159  | 51.5684  | 0.0326  | 0.831065 |
| <i>Rpl5</i>          | chr5:107900501-107909005  | 20.8987  | 21.3059  | 0.0278  | 0.663714 |
| <i>Gmeb2</i>         | chr2:181251448-181288035  | 12.6604  | 12.7611  | 0.0114  | 0.879697 |
| <i>Rasal1</i>        | chr5:120648811-120679597  | 10.5297  | 10.5756  | 0.0063  | 0.966020 |
| <i>Ankrd61</i>       | chr5:143890740-143897685  | 3.6015   | 3.5990   | -0.0010 | 0.994772 |
| <i>2510046G10Rik</i> | chr7:126649222-126649570  | 12.0720  | 12.0535  | -0.0022 | 0.988323 |
| <i>Myo9b</i>         | chr8:71272713-71360712    | 43.6301  | 44.5058  | 0.0287  | 0.706782 |
| <i>Nrg4</i>          | chr9:55220221-55326844    | 2.5678   | 2.5681   | 0.0002  | 0.998646 |
| <i>Ipk2</i>          | chr9:108795993-108806333  | 19.1035  | 19.1998  | 0.0073  | 0.899959 |
| <i>Slc25a5</i>       | chrX:36795650-36798807    | 56.0046  | 56.2659  | 0.0067  | 0.950793 |
| <i>Glud1</i>         | chr14:34310726-34345144   | 55.2618  | 55.6842  | 0.0110  | 0.861176 |
| <i>Igf2r</i>         | chr17:12682405-12769664   | 32.9346  | 33.1790  | 0.0107  | 0.890868 |
| <i>D330041H03Rik</i> | chr17:24404648-24414542   | 14.3082  | 14.4096  | 0.0102  | 0.899793 |

|               |                           |          |          |         |          |
|---------------|---------------------------|----------|----------|---------|----------|
| Gm16069       | chr3:89180754-89182293    | 25.9310  | 26.6733  | 0.0407  | 0.785461 |
| Stoml2        | chr4:43027689-43031710    | 11.1553  | 11.1910  | 0.0046  | 0.962084 |
| Id3           | chr4:136143496-136145755  | 23.8442  | 24.4132  | 0.0340  | 0.808591 |
| Prune         | chr3:95253673-95282076    | 4.2906   | 4.3058   | 0.0051  | 0.970459 |
| Pex13         | chr11:23646478-23665959   | 5.5054   | 5.6185   | 0.0293  | 0.692243 |
| Gm20460       | chr17:34614483-34627349   | 5.6540   | 5.6663   | 0.0031  | 0.989219 |
| Aplp2         | chr9:31149556-31211815    | 20.0312  | 20.1816  | 0.0108  | 0.817469 |
| Smarca5       | chr8:80698506-80739497    | 15.3221  | 15.4202  | 0.0092  | 0.885309 |
| Gm11427       | chr11:83254195-83260534   | 5.0936   | 5.0948   | 0.0004  | 0.998378 |
| Amica1        | chr9:45079182-45108530    | 8.0272   | 8.0463   | 0.0034  | 0.978617 |
| Btf3l4        | chr4:108814294-108833614  | 2.8612   | 2.8637   | 0.0013  | 0.989246 |
| Rap1b         | chr10:117814470-117845935 | 216.9644 | 218.1451 | 0.0078  | 0.937118 |
| A530054K11Rik | chr13:67617000-67637791   | 12.4412  | 12.5166  | 0.0087  | 0.899789 |
| Zfp825        | chr13:74480516-74482943   | 5.1495   | 5.2870   | 0.0380  | 0.779423 |
| Fbxo25        | chr8:13907805-13940521    | 14.2873  | 14.3465  | 0.0060  | 0.943608 |
| Acsbg1        | chr9:54604876-54661870    | 3.3124   | 3.4069   | 0.0406  | 0.864783 |
| Klhl15        | chrX:94234598-94277724    | 2.8664   | 2.9332   | 0.0332  | 0.679584 |
| Eif3e         | chr15:43250039-43282736   | 155.8994 | 156.3391 | 0.0041  | 0.977304 |
| Dgcr8         | chr16:18253947-18289249   | 14.0504  | 14.1753  | 0.0128  | 0.766712 |
| Pigp          | chr16:94358762-94371015   | 9.0240   | 9.2410   | 0.0343  | 0.839850 |
| Csf2ra        | chr19:61224401-61228418   | 2.1207   | 2.2020   | 0.0543  | 0.786713 |
| Ahctf1        | chr1:179744893-179803680  | 33.3580  | 33.6276  | 0.0116  | 0.848080 |
| Cd160         | chr3:96798762-96829351    | 3.1690   | 3.2539   | 0.0382  | 0.870757 |
| Mthfr         | chr4:148039076-148059551  | 5.6389   | 5.6675   | 0.0073  | 0.964890 |
| Zwint         | chr10:72654844-72674964   | 14.1425  | 14.2501  | 0.0109  | 0.782311 |
| Prdm4         | chr10:85891969-85916945   | 16.0587  | 16.3762  | 0.0282  | 0.599213 |
| Dyrk2         | chr10:118859348-118868903 | 37.6193  | 38.4753  | 0.0325  | 0.765136 |
| Dctn2         | chr10:127266261-127281959 | 43.8005  | 44.0795  | 0.0092  | 0.904680 |
| Gm22123       | chr11:6472224-6472277     | 125.4740 | 128.8669 | 0.0385  | 0.835790 |
| Slc36a1       | chr11:55204349-55236330   | 5.1764   | 5.3001   | 0.0341  | 0.785115 |
| Adprm         | chr11:67037904-67052594   | 14.3303  | 14.6225  | 0.0291  | 0.797811 |
| Mttr4         | chr11:87592161-87616302   | 12.0383  | 12.1292  | 0.0108  | 0.900712 |
| Cdk5rap3      | chr11:96907425-96916496   | 15.4211  | 15.5391  | 0.0110  | 0.870124 |
| Vps25         | chr11:101253706-101259549 | 21.5862  | 21.7348  | 0.0099  | 0.902049 |
| Gpatch8       | chr11:102475914-102556392 | 13.5436  | 13.7952  | 0.0266  | 0.500967 |
| Cdc27         | chr11:104502744-104550620 | 19.6496  | 20.0050  | 0.0259  | 0.589334 |
| Acox1         | chr11:116171887-116199045 | 8.6083   | 8.7845   | 0.0292  | 0.654207 |
| Scfd1         | chr12:51377579-51450096   | 36.4231  | 37.1162  | 0.0272  | 0.732458 |
| Fcf1          | chr12:84970896-84983303   | 16.9366  | 17.2906  | 0.0298  | 0.725309 |
| Ndufs4        | chr13:114287794-114388094 | 28.1709  | 28.2378  | 0.0034  | 0.979062 |
| Caprin2       | chr6:148842491-148896237  | 1.1881   | 1.2187   | 0.0366  | 0.825433 |
| AW146154      | chr7:41478879-41499890    | 4.0646   | 4.0701   | 0.0019  | 0.977710 |
| Prr14         | chr7:127459610-127476759  | 17.6799  | 18.0853  | 0.0327  | 0.737559 |
| Tti2          | chr8:31150315-31164702    | 16.0591  | 16.1675  | 0.0097  | 0.876812 |
| Siah1a        | chr8:86723939-86746006    | 19.0506  | 19.1739  | 0.0093  | 0.854184 |
| Terf2         | chr8:107069399-107096547  | 11.5672  | 11.7986  | 0.0286  | 0.441996 |
| Zw10          | chr9:49055580-49078772    | 20.8347  | 21.2222  | 0.0266  | 0.590688 |
| Pik3cb        | chr9:99038401-99140621    | 2.6740   | 2.6839   | 0.0053  | 0.964442 |
| Rhoa          | chr9:108306204-108337939  | 52.8733  | 54.0126  | 0.0308  | 0.792610 |
| Nckip5d       | chr9:108808379-108818366  | 3.1891   | 3.2751   | 0.0384  | 0.791797 |
| Vma21         | chrX:71815923-71839757    | 1.1002   | 1.1260   | 0.0335  | 0.797046 |
| Hccs          | chrX:169250192-169320372  | 6.8139   | 6.9488   | 0.0283  | 0.775787 |
| Azin1         | chr15:38487429-38519266   | 24.4209  | 24.9001  | 0.0280  | 0.781699 |
| Dhrs4         | chr14:55478757-55490338   | 10.2020  | 10.2233  | 0.0030  | 0.970256 |
| Zfp760        | chr17:21707740-21725636   | 3.8548   | 3.8545   | -0.0001 | 0.999431 |
| Khrrp         | chr17:57021057-57031507   | 21.6818  | 22.1655  | 0.0318  | 0.754920 |
| Ptplb         | chr16:35022420-35109175   | 1.5992   | 1.6474   | 0.0428  | 0.592307 |
| Kpna1         | chr16:35978749-36037131   | 12.0506  | 12.1320  | 0.0097  | 0.872604 |
| Ccdc88b       | chr19:6844622-6858211     | 45.8811  | 46.9129  | 0.0321  | 0.789666 |
| Slc35a4       | chr18:36679578-36683858   | 12.5004  | 12.7546  | 0.0291  | 0.668195 |
| Lars          | chr18:42202349-42262122   | 33.5585  | 34.1648  | 0.0258  | 0.506489 |
| Csnk1a1       | chr18:61555273-61590061   | 51.1468  | 51.5519  | 0.0114  | 0.840500 |
| Fbxw2         | chr2:34804513-34826311    | 20.9799  | 21.3637  | 0.0262  | 0.405155 |
| Dnmt3b        | chr2:153649449-153687730  | 2.7486   | 2.7621   | 0.0071  | 0.961344 |
| Cdk5rap1      | chr2:154335379-154373010  | 7.8092   | 7.6943   | -0.0214 | 0.955368 |
| Bmp7          | chr2:172868011-172940321  | 1.0682   | 1.0473   | -0.0286 | 0.955589 |
| Proser1       | chr3:53463665-53481755    | 2.2118   | 2.2726   | 0.0391  | 0.750102 |
| 5830417110Rik | chr3:88775215-88826328    | 3.1824   | 3.2525   | 0.0314  | 0.592527 |
| Tars2         | chr3:95739975-95754977    | 17.0696  | 17.2046  | 0.0114  | 0.888878 |
| Thap3         | chr4:151982638-151988997  | 20.6274  | 20.7856  | 0.0110  | 0.917085 |
| Ero1lb        | chr13:12565882-12609526   | 5.7074   | 5.7259   | 0.0047  | 0.976023 |

|                      |                           |          |          |         |          |
|----------------------|---------------------------|----------|----------|---------|----------|
| <i>Pcnx14</i>        | chr12:72536356-72580213   | 2.4180   | 2.4333   | 0.0092  | 0.920839 |
| <i>Stoml1</i>        | chr9:58253163-58262523    | 12.8999  | 12.9710  | 0.0079  | 0.947288 |
| <i>Nfkbib</i>        | chr7:28758250-28767512    | 9.0504   | 9.2712   | 0.0348  | 0.774367 |
| <i>Snrpc</i>         | chr17:27839973-27851968   | 3.2323   | 3.3039   | 0.0316  | 0.657901 |
| <i>Tsen2</i>         | chr6:115544663-115578350  | 1.7550   | 1.7655   | 0.0087  | 0.937432 |
| <i>Vps9d1</i>        | chr8:123242355-123254348  | 6.1398   | 6.1851   | 0.0106  | 0.914089 |
| <i>2210404O09Rik</i> | chr17:21879569-21908092   | 6.7900   | 6.9359   | 0.0307  | 0.845195 |
| <i>Chmp4b</i>        | chr2:154651704-154694785  | 89.9668  | 90.6147  | 0.0104  | 0.884838 |
| <i>Tnfrsf8</i>       | chr18:49979426-50107173   | 8.9671   | 9.1674   | 0.0319  | 0.834392 |
| <i>1810032O08Rik</i> | chr11:116671659-116675799 | 6.2286   | 6.2615   | 0.0076  | 0.905186 |
| <i>Cutc</i>          | chr19:43752995-43768638   | 4.1219   | 4.2416   | 0.0413  | 0.630433 |
| <i>Ccny11</i>        | chr1:64690454-64725644    | 1.4683   | 1.5104   | 0.0408  | 0.708664 |
| <i>Dusp19</i>        | chr2:80617044-80632361    | 3.6657   | 3.6719   | 0.0024  | 0.974564 |
| <i>Isoc1</i>         | chr18:58659481-58679570   | 24.0457  | 24.2390  | 0.0115  | 0.806002 |
| <i>Lmtk2</i>         | chr5:144100435-144188204  | 11.2112  | 11.4607  | 0.0318  | 0.820962 |
| <i>Hist1h4k</i>      | chr13:21750193-21750505   | 68.7593  | 67.8554  | -0.0191 | 0.951770 |
| <i>Strap</i>         | chr6:137735077-137751932  | 29.7452  | 29.9511  | 0.0100  | 0.877301 |
| <i>Klhdc4</i>        | chr8:121796312-121829569  | 6.7522   | 6.7848   | 0.0070  | 0.931410 |
| <i>Mturn</i>         | chr6:54681771-54700406    | 20.9395  | 21.3836  | 0.0303  | 0.805732 |
| <i>Dock5</i>         | chr14:67751927-67933572   | 1.9975   | 2.0122   | 0.0106  | 0.920285 |
| <i>Nrarp</i>         | chr2:25180757-25183330    | 2.0282   | 2.0266   | -0.0011 | 0.995830 |
| <i>H2-T22</i>        | chr17:36037127-36042747   | 45.2727  | 46.1618  | 0.0281  | 0.703774 |
| <i>Cenpo</i>         | chr12:4196003-4234294     | 6.6582   | 6.7028   | 0.0096  | 0.936238 |
| <i>Wdr41</i>         | chr13:94976343-95023314   | 6.0167   | 6.0474   | 0.0073  | 0.923317 |
| <i>Gm14820</i>       | chrX:8049171-8074619      | 4.2045   | 4.2119   | 0.0026  | 0.963400 |
| <i>Gm15932</i>       | chr14:55567218-55575991   | 16.9087  | 17.3869  | 0.0402  | 0.811030 |
| <i>Mrpl40</i>        | chr16:18872017-18876767   | 27.9623  | 28.0572  | 0.0049  | 0.967118 |
| <i>Pan2</i>          | chr10:128303334-128321358 | 13.7608  | 14.0522  | 0.0302  | 0.692562 |
| <i>Eftud2</i>        | chr11:102838472-102880985 | 11.5474  | 11.6529  | 0.0131  | 0.797162 |
| <i>Arl16</i>         | chr11:120464865-120467607 | 5.0172   | 5.1308   | 0.0323  | 0.731425 |
| <i>Mier3</i>         | chr13:111686177-111718596 | 11.7851  | 11.8595  | 0.0091  | 0.915662 |
| <i>Wdr19</i>         | chr5:65199695-65260415    | 2.6971   | 2.7614   | 0.0340  | 0.706269 |
| <i>2900076A07Rik</i> | chr7:81523549-81531498    | 18.6438  | 18.9941  | 0.0269  | 0.733784 |
| <i>Armc8</i>         | chr9:99478390-99568899    | 18.1744  | 18.3234  | 0.0118  | 0.761454 |
| <i>Gm12802</i>       | chr4:107126612-107136252  | 2.5144   | 2.5878   | 0.0415  | 0.698077 |
| <i>Fhl3</i>          | chr4:124700700-124708611  | 4.7168   | 4.8556   | 0.0418  | 0.777022 |
| <i>Traj21</i>        | chr14:54198789-54198846   | 284.5100 | 291.2146 | 0.0336  | 0.719420 |
| <i>Rnf38</i>         | chr4:44126209-44233789    | 19.7307  | 19.9027  | 0.0125  | 0.877659 |
| <i>Smarca4</i>       | chr9:21616168-21704230    | 35.7852  | 36.5296  | 0.0297  | 0.766908 |
| <i>1110051M20Rik</i> | chr2:91275067-91444704    | 8.6071   | 8.6805   | 0.0123  | 0.892717 |
| <i>Gba2</i>          | chr4:43566927-43578873    | 18.0589  | 18.4485  | 0.0308  | 0.741785 |
| <i>Tnrc6c</i>        | chr11:117654288-117763439 | 21.8006  | 22.2518  | 0.0296  | 0.758981 |
| <i>Tmem106c</i>      | chr15:97964228-97970286   | 6.0736   | 6.0810   | 0.0017  | 0.989305 |
| <i>5830432E09Rik</i> | chr7:135635930-135652314  | 2.6563   | 2.6678   | 0.0062  | 0.928230 |
| <i>Fbxo42</i>        | chr4:141147912-141204062  | 6.3478   | 6.3961   | 0.0109  | 0.919700 |
| <i>Pcmt1</i>         | chr10:7629372-7681136     | 12.3462  | 12.4280  | 0.0095  | 0.888858 |
| <i>Nae1</i>          | chr8:104511027-104534637  | 12.4350  | 12.4869  | 0.0060  | 0.962100 |
| <i>Folr4</i>         | chr9:14885813-14903949    | 44.9712  | 45.0918  | 0.0039  | 0.984204 |
| <i>Armcx2</i>        | chrX:134804144-134809221  | 8.1876   | 8.2460   | 0.0103  | 0.827498 |
| <i>Tfam</i>          | chr10:71225463-71238280   | 19.5433  | 19.6763  | 0.0098  | 0.902239 |
| <i>Rnf215</i>        | chr11:4135201-4141172     | 15.2192  | 15.3453  | 0.0119  | 0.749549 |
| <i>4930470G03Rik</i> | chr13:21440470-21445934   | 32.3907  | 32.6152  | 0.0100  | 0.889015 |
| <i>Slain2</i>        | chr5:72914303-72978829    | 16.7556  | 17.0514  | 0.0252  | 0.531540 |
| <i>Shfm1</i>         | chr6:6557293-6578658      | 43.2834  | 43.3679  | 0.0028  | 0.988027 |
| <i>Rnf103</i>        | chr6:71493893-71525020    | 11.3672  | 11.4437  | 0.0097  | 0.900503 |
| <i>Ube2s</i>         | chr7:4808154-4812351      | 7.3360   | 7.5259   | 0.0369  | 0.757177 |
| <i>Acer3</i>         | chr7:98213657-98321208    | 2.7387   | 2.8006   | 0.0322  | 0.734469 |
| <i>Ier2</i>          | chr8:84661330-84662852    | 51.5068  | 51.8245  | 0.0089  | 0.955508 |
| <i>Tgm4</i>          | chr9:123034738-123067561  | 1.6783   | 1.7179   | 0.0337  | 0.769533 |
| <i>A430057M04Rik</i> | chr14:21847577-21856926   | 0.9723   | 0.9750   | 0.0040  | 0.976883 |
| <i>Zfp142</i>        | chr1:74565126-74588246    | 4.0309   | 4.0659   | 0.0125  | 0.889985 |
| <i>Fam174a</i>       | chr1:95313627-95335284    | 7.5230   | 7.6775   | 0.0293  | 0.820112 |
| <i>D1Ert622e</i>     | chr1:97643902-97662074    | 6.2254   | 6.2615   | 0.0083  | 0.927951 |
| <i>Cdca7</i>         | chr2:72476158-72486893    | 3.7536   | 3.7647   | 0.0043  | 0.954182 |
| <i>Ttl</i>           | chr2:129065941-129096283  | 2.1306   | 2.1838   | 0.0356  | 0.788501 |
| <i>Slc33a1</i>       | chr3:63933506-63964768    | 11.3974  | 11.6118  | 0.0269  | 0.666197 |
| <i>Gm11737</i>       | chr11:118204711-118205179 | 9.1314   | 9.1648   | 0.0053  | 0.983536 |
| <i>Nbn</i>           | chr4:15957924-15992589    | 19.7465  | 19.8551  | 0.0079  | 0.925876 |
| <i>Vezt</i>          | chr10:93939164-94035817   | 2.3070   | 2.3541   | 0.0292  | 0.653800 |
| <i>Ifi47</i>         | chr11:49076586-49096974   | 126.3773 | 127.3879 | 0.0115  | 0.863763 |
| <i>Stt3a</i>         | chr9:36731274-36767679    | 17.2045  | 17.5095  | 0.0254  | 0.579939 |



|                      |                           |          |          |         |          |
|----------------------|---------------------------|----------|----------|---------|----------|
| <i>Herc1</i>         | chr9:66350449-66508775    | 29.0271  | 29.2858  | 0.0128  | 0.881182 |
| <i>1110012L19Rik</i> | chrX:70385876-70389417    | 9.1709   | 9.3608   | 0.0296  | 0.802454 |
| <i>Ddt</i>           | chr10:75771229-75773414   | 14.4206  | 14.7566  | 0.0332  | 0.858192 |
| <i>Arid3a</i>        | chr10:79927042-79955018   | 3.4918   | 3.5078   | 0.0066  | 0.962316 |
| <i>B4galnt1</i>      | chr10:127165155-127172340 | 172.3476 | 173.7627 | 0.0118  | 0.911163 |
| <i>Zppb</i>          | chr11:11279625-11462408   | 1.7528   | 1.7567   | 0.0032  | 0.973931 |
| <i>Cisd3</i>         | chr11:97685825-97688621   | 9.1798   | 9.1953   | 0.0024  | 0.981509 |
| <i>Thra</i>          | chr11:98740637-98769006   | 4.0678   | 4.0939   | 0.0092  | 0.953409 |
| <i>Usp36</i>         | chr11:118259650-118290244 | 9.9996   | 10.2284  | 0.0326  | 0.832224 |
| <i>Ccdc127</i>       | chr13:74350308-74365783   | 6.1744   | 6.2238   | 0.0115  | 0.728932 |
| <i>Sept11</i>        | chr5:93093456-93174958    | 12.3638  | 12.6112  | 0.0286  | 0.715736 |
| <i>Eij2ak1</i>       | chr5:143817787-143904256  | 10.7551  | 10.9554  | 0.0266  | 0.640360 |
| <i>Aplf</i>          | chr6:87628428-87672168    | 2.7157   | 2.7255   | 0.0052  | 0.964020 |
| <i>Gabrapl1</i>      | chr6:129533199-129542331  | 2.4535   | 2.5238   | 0.0407  | 0.910167 |
| <i>Cyth2</i>         | chr7:45806636-45814581    | 21.9721  | 22.1653  | 0.0126  | 0.813568 |
| <i>Mvp</i>           | chr7:126986859-127014621  | 19.9635  | 20.1308  | 0.0120  | 0.876993 |
| <i>Tspan4</i>        | chr7:141475239-141493427  | 1.9248   | 1.9903   | 0.0483  | 0.861036 |
| <i>Pet100</i>        | chr8:3621550-3624231      | 23.3358  | 23.8490  | 0.0314  | 0.865352 |
| <i>Mmaa</i>          | chr8:79266423-79294956    | 3.6079   | 3.6909   | 0.0328  | 0.796526 |
| <i>BC023829</i>      | chrX:70459752-70477180    | 7.3315   | 7.4803   | 0.0290  | 0.555194 |
| <i>Gyk</i>           | chrX:85701936-85776819    | 1.1082   | 1.1085   | 0.0003  | 0.998376 |
| <i>Fam120c</i>       | chrX:151344174-151471842  | 3.2083   | 3.2340   | 0.0115  | 0.896393 |
| <i>Fam84b</i>        | chr15:60818995-60825080   | 6.5043   | 6.6361   | 0.0289  | 0.728541 |
| <i>Copz1</i>         | chr15:103272910-103299862 | 26.7191  | 27.2863  | 0.0303  | 0.817233 |
| <i>Khynyn</i>        | chr14:55884968-55896781   | 39.7848  | 40.5534  | 0.0276  | 0.747887 |
| <i>Cog3</i>          | chr14:75702350-75754493   | 25.0945  | 25.5323  | 0.0250  | 0.370263 |
| <i>Sik1</i>          | chr17:31844247-31855792   | 4.8442   | 4.9500   | 0.0312  | 0.625841 |
| <i>Pbx2</i>          | chr17:34591265-34597400   | 24.7380  | 25.1986  | 0.0266  | 0.633209 |
| <i>Aip</i>           | chr19:4114445-4125858     | 27.6821  | 28.2889  | 0.0313  | 0.803518 |
| <i>Dnpep</i>         | chr1:75307895-75317637    | 12.9349  | 13.1838  | 0.0275  | 0.692522 |
| <i>Nit1</i>          | chr1:171338007-171345646  | 15.2464  | 15.3752  | 0.0121  | 0.707431 |
| <i>0610009O20Rik</i> | chr18:38250248-38262629   | 17.8400  | 17.9972  | 0.0127  | 0.870037 |
| <i>Gm4951</i>        | chr18:60212079-60247820   | 2.8860   | 2.7836   | -0.0521 | 0.948990 |
| <i>Hps3</i>          | chr3:19995944-20035315    | 14.6124  | 14.8717  | 0.0254  | 0.666563 |
| <i>Ctso</i>          | chr3:81932600-81956725    | 16.5438  | 16.6472  | 0.0090  | 0.933116 |
| <i>S100a9</i>        | chr3:90692631-90695721    | 11.1400  | 10.7427  | -0.0524 | 0.946143 |
| <i>Scnm1</i>         | chr3:95129535-95134012    | 25.2068  | 25.3563  | 0.0085  | 0.924068 |
| <i>Phtf1os</i>       | chr3:103964535-103968581  | 14.1094  | 14.3745  | 0.0269  | 0.808432 |
| <i>Dbt</i>           | chr3:116513069-116549976  | 8.2205   | 8.3904   | 0.0295  | 0.623183 |
| <i>Gm11870</i>       | chr4:16011004-16012326    | 4.0381   | 4.1651   | 0.0447  | 0.843865 |
| <i>Klf24</i>         | chr4:41390744-41464887    | 0.9453   | 0.9444   | -0.0014 | 0.995173 |
| <i>Pabpc4</i>        | chr4:123262350-123298925  | 6.6520   | 6.7086   | 0.0122  | 0.874043 |
| <i>Rnh1</i>          | chr7:141160327-141172851  | 24.9898  | 25.1398  | 0.0086  | 0.927369 |
| <i>Tjap1</i>         | chr17:46257850-46283026   | 5.5627   | 5.6988   | 0.0349  | 0.751130 |
| <i>Bmi1</i>          | chr2:18677017-18686629    | 21.7554  | 22.1482  | 0.0258  | 0.755529 |
| <i>Sub1</i>          | chr15:11981338-11996983   | 40.1798  | 40.3058  | 0.0045  | 0.979624 |
| <i>Osgin2</i>        | chr4:15997120-16013888    | 3.8434   | 3.9227   | 0.0295  | 0.698342 |
| <i>Klh128</i>        | chr12:64942439-64965536   | 17.2438  | 17.3793  | 0.0113  | 0.873791 |
| <i>Arhgap35</i>      | chr7:16494472-16614993    | 6.5394   | 6.5942   | 0.0120  | 0.930983 |
| <i>Nox1</i>          | chrX:134086420-134221956  | 1.9462   | 1.9880   | 0.0306  | 0.838886 |
| <i>2210013O21Rik</i> | chrX:153723589-153741264  | 6.2534   | 6.3962   | 0.0326  | 0.754066 |
| <i>Arid1b</i>        | chr17:4994331-5347656     | 12.3121  | 12.5797  | 0.0310  | 0.801058 |
| <i>Gid8</i>          | chr2:180710116-180718733  | 20.2542  | 20.4047  | 0.0107  | 0.869822 |
| <i>2010107E04Rik</i> | chr12:111961375-111966977 | 97.8073  | 98.0121  | 0.0030  | 0.987473 |
| <i>Mcm9</i>          | chr10:53536328-53630439   | 9.9935   | 10.0870  | 0.0134  | 0.862655 |
| <i>Tbrg4</i>         | chr11:6615597-6626067     | 12.6696  | 12.7888  | 0.0135  | 0.868144 |
| <i>Hacl1</i>         | chr14:31552904-31641286   | 3.6542   | 3.6745   | 0.0080  | 0.872849 |
| <i>Hells</i>         | chr19:38930914-38971051   | 2.8299   | 2.8374   | 0.0038  | 0.976725 |
| <i>C330018D20Rik</i> | chr18:56955832-56975368   | 4.6067   | 4.7027   | 0.0298  | 0.568608 |
| <i>Vcp</i>           | chr4:42979962-43000507    | 15.7858  | 15.9299  | 0.0131  | 0.648880 |
| <i>Pea15a</i>        | chr1:172196727-172206804  | 18.3063  | 18.6695  | 0.0283  | 0.759191 |
| <i>Celf1</i>         | chr2:90940381-91019497    | 29.5232  | 30.0992  | 0.0279  | 0.747571 |
| <i>Ndufa5</i>        | chr6:24518665-24528013    | 21.0248  | 21.0282  | 0.0002  | 0.999165 |
| <i>Eef2k</i>         | chr7:120842830-120907219  | 2.5343   | 2.5916   | 0.0323  | 0.756797 |
| <i>Prkcsh</i>        | chr9:22003034-22014219    | 43.4562  | 44.2695  | 0.0268  | 0.668541 |
| <i>Atad1</i>         | chr19:32672562-32712298   | 45.1855  | 45.5321  | 0.0110  | 0.872922 |
| <i>Lck</i>           | chr4:129548343-129573641  | 240.6464 | 245.5141 | 0.0289  | 0.788151 |
| <i>Ghdc</i>          | chr11:100766031-100770957 | 1.9773   | 1.9744   | -0.0021 | 0.992582 |
| <i>Cpsf1</i>         | chr15:76595808-76607591   | 27.1446  | 27.3968  | 0.0133  | 0.887221 |
| <i>Uimc1</i>         | chr13:55027879-55100300   | 25.1719  | 25.5932  | 0.0239  | 0.573277 |
| <i>Cyp4v3</i>        | chr8:45269670-45333216    | 2.1483   | 2.1915   | 0.0287  | 0.867054 |

|                      |                           |           |           |         |          |
|----------------------|---------------------------|-----------|-----------|---------|----------|
| <i>Eif4e</i>         | chr3:138526190-138557599  | 11.2403   | 11.4530   | 0.0270  | 0.837958 |
| <i>Cmpk1</i>         | chr4:114959335-114987241  | 16.9946   | 17.3296   | 0.0282  | 0.829448 |
| <i>Casp9</i>         | chr4:141793611-141815976  | 3.4374    | 3.5188    | 0.0337  | 0.738393 |
| <i>1700120B22Rik</i> | chr10:63243073-63244148   | 19.4079   | 19.5496   | 0.0105  | 0.938101 |
| <i>Ppp1r12a</i>      | chr10:108162399-108277575 | 103.4076  | 105.1841  | 0.0246  | 0.734952 |
| <i>Ormdl2</i>        | chr10:128817456-128821631 | 24.4435   | 24.5999   | 0.0092  | 0.928540 |
| <i>Ttc1</i>          | chr11:43729511-43748008   | 20.3087   | 20.6659   | 0.0251  | 0.731934 |
| <i>Gp1ba</i>         | chr11:70639121-70642036   | 3.1240    | 3.2030    | 0.0360  | 0.757864 |
| <i>Kat7</i>          | chr11:95274258-95310246   | 26.2205   | 26.4758   | 0.0140  | 0.732102 |
| <i>Tex2</i>          | chr11:106502146-106613423 | 16.5633   | 16.8670   | 0.0262  | 0.750278 |
| <i>Ube2o</i>         | chr11:116537739-116581447 | 5.2026    | 5.2446    | 0.0116  | 0.931366 |
| <i>Foxk2</i>         | chr11:121259989-121309896 | 9.8326    | 9.9260    | 0.0136  | 0.858856 |
| <i>Aldh2</i>         | chr5:121566026-121593824  | 3.0953    | 3.1060    | 0.0050  | 0.956828 |
| <i>Arl6ip4</i>       | chr5:124116088-124118196  | 23.7095   | 24.2158   | 0.0305  | 0.814636 |
| <i>Zcwpw1</i>        | chr5:137787797-137822621  | 6.2229    | 6.3611    | 0.0317  | 0.839834 |
| <i>Rpl14-ps1</i>     | chr7:45324940-45325651    | 142.1820  | 146.4062  | 0.0422  | 0.881667 |
| <i>A430078G23Rik</i> | chr8:3353414-3390295      | 61.8849   | 63.0422   | 0.0267  | 0.709282 |
| <i>Hmgxb4</i>        | chr8:74993355-75031978    | 11.2666   | 11.3612   | 0.0121  | 0.825213 |
| <i>Wdr83</i>         | chr8:85075034-85081306    | 12.8280   | 13.0645   | 0.0264  | 0.730277 |
| <i>Hcfc1</i>         | chrX:73942791-73966357    | 18.8419   | 19.2745   | 0.0327  | 0.853636 |
| <i>Taz</i>           | chrX:74281911-74290151    | 19.3413   | 19.4941   | 0.0114  | 0.896239 |
| <i>Gm24201</i>       | chr16:23110382-231110507  | 68.7556   | 69.1061   | 0.0073  | 0.961731 |
| <i>A930006K02Rik</i> | chr16:91465103-91470121   | 7.7570    | 7.9655    | 0.0383  | 0.756874 |
| <i>Fam178a</i>       | chr19:44931118-44983787   | 22.9646   | 23.1798   | 0.0135  | 0.780318 |
| <i>Rrs1</i>          | chr1:9545407-9547454      | 9.6725    | 9.7493    | 0.0114  | 0.897688 |
| <i>Ccdc115</i>       | chr1:34436670-34439672    | 15.7118   | 15.7614   | 0.0045  | 0.978897 |
| <i>Smarcal1</i>      | chr1:72583250-72633134    | 7.6444    | 7.7908    | 0.0274  | 0.636911 |
| <i>Lnp</i>           | chr2:74520290-74579435    | 4.2747    | 4.3055    | 0.0103  | 0.907453 |
| <i>Gm561</i>         | chr2:144594053-144595366  | 9.8949    | 10.1046   | 0.0303  | 0.818858 |
| <i>Fam63a</i>        | chr3:95281344-95296166    | 5.3920    | 5.4406    | 0.0129  | 0.830349 |
| <i>Gbp2</i>          | chr3:142620601-142638008  | 79.0362   | 80.6436   | 0.0290  | 0.840417 |
| <i>Usp45</i>         | chr4:21767155-21837872    | 13.8019   | 14.0517   | 0.0259  | 0.721537 |
| <i>Cpt2</i>          | chr4:107903980-107923610  | 4.5159    | 4.6311    | 0.0364  | 0.826512 |
| <i>Rlf</i>           | chr4:121145372-121215084  | 27.7243   | 28.2036   | 0.0247  | 0.707819 |
| <i>Gm16008</i>       | chr4:156022007-156031643  | 20.3318   | 20.4362   | 0.0074  | 0.952275 |
| <i>Stap1</i>         | chr5:86071745-86103993    | 19.5358   | 19.8783   | 0.0251  | 0.747992 |
| <i>Hrsp12</i>        | chr15:34484020-34495255   | 2.7126    | 2.7665    | 0.0284  | 0.880315 |
| <i>Gm9754</i>        | chr5:118065359-118069710  | 2.7550    | 2.8336    | 0.0406  | 0.857978 |
| <i>Ctsb</i>          | chr14:63122461-63145919   | 33.4458   | 34.1149   | 0.0286  | 0.846459 |
| <i>Hbp1</i>          | chr12:31926253-31950535   | 39.0718   | 39.7469   | 0.0247  | 0.712541 |
| <i>Ergic2</i>        | chr6:148179078-148212374  | 14.0774   | 14.3163   | 0.0243  | 0.618330 |
| <i>Leng9</i>         | chr7:4148182-4149872      | 9.3166    | 9.5097    | 0.0296  | 0.745220 |
| <i>Golga5</i>        | chr12:102469133-102497902 | 36.6696   | 37.3000   | 0.0246  | 0.706231 |
| <i>Fkbp1</i>         | chr17:34644763-34646324   | 3.1708    | 3.1646    | -0.0028 | 0.981040 |
| <i>Rwdd1</i>         | chr10:33996554-34019624   | 11.2200   | 11.2463   | 0.0034  | 0.979650 |
| <i>Psmc1</i>         | chr12:100110185-100123364 | 47.6837   | 47.9978   | 0.0095  | 0.924514 |
| <i>Aars</i>          | chr8:111033143-111057664  | 16.1636   | 16.3242   | 0.0143  | 0.848096 |
| <i>Rhebl1</i>        | chr15:98877777-98881404   | 5.1206    | 5.1380    | 0.0049  | 0.971285 |
| <i>Acot2</i>         | chr12:83987860-83993873   | 9.1862    | 9.3567    | 0.0265  | 0.732381 |
| <i>Naa35</i>         | chr13:59585258-59634798   | 6.3579    | 6.4078    | 0.0113  | 0.860097 |
| <i>Ppp6r2</i>        | chr15:89253034-89286261   | 22.8103   | 23.0470   | 0.0149  | 0.796631 |
| <i>Gm5239</i>        | chr18:35536582-35536951   | 18.6692   | 18.5472   | -0.0095 | 0.975872 |
| <i>NA</i>            | chr3:90062795-90068347    | 9.3466    | 9.5293    | 0.0279  | 0.589886 |
| <i>Zfp951</i>        | chr5:104814342-104828957  | 4.6879    | 4.6746    | -0.0041 | 0.991771 |
| <i>Rps15a-ps5</i>    | chr5:105797286-105797743  | 49.6352   | 51.1530   | 0.0435  | 0.893463 |
| <i>Mplkip</i>        | chr13:17695412-17699105   | 14.2433   | 14.4935   | 0.0251  | 0.417070 |
| <i>Snx10</i>         | chr6:51523900-51590679    | 2.4620    | 2.5117    | 0.0288  | 0.891020 |
| <i>Psmc6</i>         | chr14:45329823-45349071   | 64.2994   | 64.6566   | 0.0080  | 0.954705 |
| <i>Snx32</i>         | chr19:5495277-5510489     | 11.5966   | 11.8451   | 0.0306  | 0.819993 |
| <i>B2m</i>           | chr2:122147685-122153083  | 3097.0925 | 3116.7101 | 0.0091  | 0.946994 |
| <i>Dennd2d</i>       | chr3:106482404-106503030  | 95.6943   | 97.3445   | 0.0247  | 0.699271 |
| <i>Ptpn3</i>         | chr4:57190840-57301837    | 0.5851    | 0.6008    | 0.0383  | 0.867148 |
| <i>Chrac1</i>        | chr15:73090391-73097554   | 17.8511   | 17.9580   | 0.0086  | 0.938372 |
| <i>Narf1</i>         | chr17:25773775-25783332   | 10.6457   | 10.8422   | 0.0264  | 0.779358 |
| <i>Pard6g</i>        | chr18:80046894-80119640   | 3.6755    | 3.7527    | 0.0300  | 0.793466 |
| <i>Kiz</i>           | chr2:146855863-146970097  | 14.2651   | 14.3675   | 0.0103  | 0.881618 |
| <i>Zfp113</i>        | chr5:138139701-138155744  | 6.8794    | 7.0037    | 0.0258  | 0.689237 |
| <i>Tmem91</i>        | chr7:25669138-25675166    | 1.7035    | 1.7468    | 0.0363  | 0.760708 |
| <i>Nars2</i>         | chr7:96951504-97064761    | 5.2531    | 5.3042    | 0.0140  | 0.831048 |
| <i>Apool</i>         | chrX:112311333-112372755  | 4.9207    | 4.9309    | 0.0030  | 0.986162 |
| <i>Hnrmp2</i>        | chrX:134601178-134607060  | 15.0204   | 15.2803   | 0.0248  | 0.689844 |

|                      |                           |          |           |         |          |
|----------------------|---------------------------|----------|-----------|---------|----------|
| <i>Ttc7</i>          | chr17:87282885-87381769   | 22.1562  | 22.3882   | 0.0150  | 0.835052 |
| <i>Ndrp3</i>         | chr2:156927344-156992056  | 24.3316  | 24.5469   | 0.0127  | 0.903699 |
| <i>Adh1</i>          | chr3:138260990-138290698  | 3.4956   | 3.4991    | 0.0014  | 0.993836 |
| <i>Mettl16</i>       | chr11:74770829-74828525   | 5.0461   | 5.1337    | 0.0248  | 0.547880 |
| <i>Brk1</i>          | chr6:113604771-113616948  | 84.9192  | 86.4496   | 0.0258  | 0.801020 |
| <i>Fgd1</i>          | chrX:151046149-151089521  | 0.8296   | 0.8509    | 0.0365  | 0.798606 |
| <i>Nudcd1</i>        | chr15:44375226-44428307   | 7.3947   | 7.5358    | 0.0273  | 0.843052 |
| <i>Tsc22d1</i>       | chr14:76414960-76507765   | 2.4327   | 2.4910    | 0.0342  | 0.819099 |
| <i>1810009A15Rik</i> | chr19:8888902-8890740     | 55.7205  | 56.7176   | 0.0256  | 0.828501 |
| <i>Aqr</i>           | chr2:114101169-114187024  | 23.6666  | 24.0598   | 0.0238  | 0.373425 |
| <i>Pyroxd1</i>       | chr6:142345653-142363257  | 14.4261  | 14.6704   | 0.0242  | 0.479067 |
| <i>Gm15210</i>       | chr8:100030486-100032147  | 5.3901   | 5.4118    | 0.0058  | 0.962549 |
| <i>Taf1</i>          | chrX:101532733-101601789  | 25.1203  | 25.3845   | 0.0151  | 0.625781 |
| <i>Usp9x</i>         | chrX:13071497-13173328    | 30.3625  | 30.6366   | 0.0130  | 0.875016 |
| <i>Zswim6</i>        | chr13:107724617-107890064 | 9.9843   | 10.0770   | 0.0133  | 0.857208 |
| <i>Anapc7</i>        | chr5:122421692-122444912  | 8.6677   | 8.8435    | 0.0290  | 0.740390 |
| <i>Ercc5</i>         | chr1:44147846-44181260    | 12.0790  | 12.2977   | 0.0259  | 0.618887 |
| <i>Vps37c</i>        | chr19:10688814-10714419   | 6.9429   | 7.1022    | 0.0327  | 0.798135 |
| <i>Nedd1</i>         | chr10:92684745-92722420   | 11.7293  | 11.8062   | 0.0094  | 0.921906 |
| <i>5330438D12Rik</i> | chr10:116581280-116583515 | 5.5752   | 5.6939    | 0.0304  | 0.779563 |
| <i>Atxn3</i>         | chr12:101918900-101958246 | 15.2732  | 15.3987   | 0.0118  | 0.874340 |
| <i>Fars2</i>         | chr13:36117410-36537592   | 10.5932  | 10.6752   | 0.0111  | 0.922699 |
| <i>Gnb2</i>          | chr5:137528126-137533510  | 48.3781  | 49.2471   | 0.0257  | 0.752752 |
| <i>Rwdd4a</i>        | chr8:47533663-47552955    | 11.3334  | 11.5446   | 0.0266  | 0.832366 |
| <i>Rbl2</i>          | chr8:91070056-91123844    | 27.3680  | 27.6219   | 0.0133  | 0.869227 |
| <i>Rpgr</i>          | chrX:10073620-10216920    | 0.7179   | 0.7159    | -0.0040 | 0.987980 |
| <i>Rab26os</i>       | chr17:24528247-24528744   | 11.4186  | 11.3748   | -0.0055 | 0.983929 |
| <i>Rnf8</i>          | chr17:29614789-29703359   | 27.6110  | 28.0832   | 0.0245  | 0.719732 |
| <i>Rps18</i>         | chr17:33951998-33956001   | 43.2323  | 44.0173   | 0.0260  | 0.805067 |
| <i>Ypel5</i>         | chr17:72836703-72851195   | 25.2181  | 25.6470   | 0.0243  | 0.807135 |
| <i>Il10rb</i>        | chr16:91406163-91425834   | 13.6989  | 13.8100   | 0.0117  | 0.873400 |
| <i>Mrpl16</i>        | chr19:11770414-11774944   | 15.2864  | 15.3743   | 0.0083  | 0.960056 |
| <i>Rbm22</i>         | chr18:60560735-60572810   | 21.2169  | 21.4288   | 0.0143  | 0.735509 |
| <i>Mettl8</i>        | chr2:70964560-71055583    | 3.4553   | 3.5251    | 0.0289  | 0.821446 |
| <i>Mtor</i>          | chr4:148448610-148557683  | 11.6738  | 11.7907   | 0.0144  | 0.896327 |
| <i>Ska2</i>          | chr11:87109233-87124635   | 5.0475   | 5.0715    | 0.0068  | 0.953821 |
| <i>Spag9</i>         | chr11:93996090-94126085   | 16.7009  | 16.8598   | 0.0137  | 0.845942 |
| <i>Cul1</i>          | chr6:47453397-47526139    | 34.4542  | 34.7502   | 0.0123  | 0.862094 |
| <i>Tmem184c</i>      | chr8:77595981-77610698    | 13.2191  | 13.3108   | 0.0100  | 0.906878 |
| <i>Fopnl</i>         | chr16:14299243-14317375   | 28.3956  | 28.5515   | 0.0079  | 0.959740 |
| <i>Rab5a</i>         | chr17:53479233-53507671   | 24.5939  | 24.7798   | 0.0109  | 0.907727 |
| <i>Nsmf</i>          | chr2:25054354-25062881    | 2.6115   | 2.6641    | 0.0288  | 0.874273 |
| <i>Dhx36</i>         | chr3:62470038-62507004    | 38.9621  | 39.3049   | 0.0126  | 0.862050 |
| <i>Gm21781</i>       | chr10:4391586-4396424     | 11.9351  | 12.1828   | 0.0296  | 0.851264 |
| <i>Cip1</i>          | chr2:84722103-84727350    | 15.3370  | 15.5971   | 0.0243  | 0.747368 |
| <i>Gm26643</i>       | chr4:43030998-43032482    | 3.2061   | 3.2046    | -0.0006 | 0.996655 |
| <i>Gm17484</i>       | chr8:25754508-25769704    | 7.5047   | 7.6372    | 0.0252  | 0.815244 |
| <i>Spg21</i>         | chr9:65460936-65488470    | 25.6864  | 26.1373   | 0.0251  | 0.821061 |
| <i>Ube2d1</i>        | chr10:71254979-71285262   | 5.6403   | 5.6981    | 0.0147  | 0.813407 |
| <i>Mob4</i>          | chr1:55131230-55154899    | 17.5466  | 17.6776   | 0.0107  | 0.910586 |
| <i>Rps11</i>         | chr7:45122387-45124389    | 995.4124 | 1014.3379 | 0.0272  | 0.872507 |
| <i>Prkaca</i>        | chr8:83972977-83996445    | 16.2997  | 16.4538   | 0.0136  | 0.865168 |
| <i>Zfp959</i>        | chr17:55892183-55898584   | 16.8443  | 16.9581   | 0.0097  | 0.918992 |
| <i>Gm6548</i>        | chr17:78850791-78851956   | 13.6431  | 13.7354   | 0.0097  | 0.946437 |
| <i>Gm10785</i>       | chr16:91688910-91715642   | 3.8035   | 3.8988    | 0.0357  | 0.832396 |
| <i>Sdhaf2</i>        | chr19:10500512-10525209   | 18.2267  | 18.3632   | 0.0108  | 0.900598 |
| <i>Gm6085</i>        | chr1:4687933-4689403      | 11.6385  | 11.6863   | 0.0059  | 0.967167 |
| <i>Gm9889</i>        | chr3:115715149-115716727  | 9.6120   | 9.6825    | 0.0105  | 0.951803 |
| <i>Rpa2</i>          | chr4:132768331-132778752  | 12.2236  | 12.3206   | 0.0114  | 0.858449 |
| <i>Chchd10</i>       | chr10:75935572-75937725   | 12.1077  | 12.1866   | 0.0094  | 0.941118 |
| <i>Pigq</i>          | chr17:25926426-25944510   | 6.7455   | 6.8155    | 0.0149  | 0.894573 |
| <i>Polr1d</i>        | chr5:147077049-147111361  | 28.6297  | 29.1238   | 0.0247  | 0.839912 |
| <i>Atg9a</i>         | chr1:75180865-75191923    | 10.9976  | 11.1130   | 0.0151  | 0.887739 |
| <i>Brox</i>          | chr1:183276341-183297256  | 14.4105  | 14.6426   | 0.0231  | 0.753108 |
| <i>Gm13625</i>       | chr2:69871411-69872202    | 23.6681  | 24.0727   | 0.0245  | 0.903090 |
| <i>Pfdn4</i>         | chr2:170496427-170519123  | 5.7082   | 5.8200    | 0.0280  | 0.866998 |
| <i>Dennd4c</i>       | chr4:86748554-86850603    | 9.4711   | 9.6312    | 0.0242  | 0.792939 |
| <i>Heatr5a</i>       | chr12:51875872-51971321   | 8.0380   | 8.1106    | 0.0130  | 0.897189 |
| <i>Mphosph10</i>     | chr7:64376575-64392268    | 20.9867  | 21.3437   | 0.0243  | 0.811739 |
| <i>AA987161</i>      | chr13:67589442-67609707   | 18.1236  | 18.4160   | 0.0231  | 0.806649 |
| <i>Pdlim5</i>        | chr3:142239585-142395696  | 13.0162  | 13.2335   | 0.0239  | 0.671276 |

|               |                           |           |           |         |          |
|---------------|---------------------------|-----------|-----------|---------|----------|
| 4933407K13Rik | chrX:75706931-75764699    | 0.9077    | 0.9279    | 0.0317  | 0.827086 |
| Prkx          | chrX:77761410-77796278    | 11.3189   | 11.4312   | 0.0142  | 0.843116 |
| Zswim1        | chr2:164822685-164826871  | 4.1161    | 4.2053    | 0.0310  | 0.770913 |
| Tlr6          | chr5:64953105-64960048    | 2.9917    | 3.0474    | 0.0267  | 0.863528 |
| Gm25791       | chr9:15314844-15314981    | 71.3021   | 72.7726   | 0.0295  | 0.932245 |
| Zmym2         | chr14:56887794-56962579   | 39.3861   | 39.7913   | 0.0148  | 0.797283 |
| AA415398      | chr4:119530307-119539529  | 2.0742    | 2.1186    | 0.0305  | 0.797658 |
| Tmem194       | chr10:127666900-127701049 | 5.1836    | 5.2282    | 0.0124  | 0.892701 |
| Cd68          | chr11:69664212-69666153   | 5.1008    | 5.2232    | 0.0342  | 0.847178 |
| Scfd2         | chr5:74204815-74531747    | 4.2222    | 4.2646    | 0.0144  | 0.885462 |
| 1110004F10Rik | chr7:116093300-116105210  | 32.8481   | 33.3935   | 0.0238  | 0.807203 |
| Osbpl5        | chr7:143688761-143756985  | 8.1014    | 8.1591    | 0.0102  | 0.955567 |
| Pias1         | chr9:62880076-62980879    | 23.5121   | 23.9265   | 0.0252  | 0.676353 |
| Nmral1        | chr16:4710058-4719356     | 1.7406    | 1.7726    | 0.0263  | 0.905563 |
| Nudcd3        | chr11:6105690-6200415     | 13.3883   | 13.6091   | 0.0236  | 0.462297 |
| Ube2k         | chr5:65537232-65598988    | 10.5115   | 10.5847   | 0.0100  | 0.952998 |
| Cacna2d4      | chr6:119236525-119352407  | 6.9113    | 6.9813    | 0.0145  | 0.809362 |
| Gys1          | chr7:45434843-45456619    | 2.9351    | 2.9985    | 0.0308  | 0.758787 |
| 2210018M11Rik | chr7:98590614-98656569    | 18.8850   | 19.2470   | 0.0274  | 0.804790 |
| Angptl6       | chr9:20873808-20879727    | 5.1167    | 5.2329    | 0.0324  | 0.794810 |
| Rrp1b         | chr17:32036099-32062865   | 9.3137    | 9.4048    | 0.0140  | 0.891845 |
| Olfir99       | chr17:37279500-37280418   | 7.4137    | 7.4697    | 0.0109  | 0.950887 |
| Rab3gap1      | chr1:127868772-127943868  | 26.8071   | 27.0910   | 0.0152  | 0.714798 |
| Zfyve19       | chr2:119208616-119217049  | 7.7078    | 7.8396    | 0.0245  | 0.785942 |
| Gcnt7         | chr2:172450312-172458596  | 5.6986    | 5.7350    | 0.0092  | 0.954241 |
| S100a8        | chr3:90669070-90670034    | 10.3736   | 10.1202   | -0.0357 | 0.968368 |
| Otud6b        | chr4:14809497-14826587    | 8.9516    | 9.0329    | 0.0130  | 0.847371 |
| Rnf145        | chr11:44518963-44565520   | 40.6285   | 41.2871   | 0.0232  | 0.696985 |
| Capza2        | chr6:17636233-17666972    | 34.7985   | 35.0868   | 0.0119  | 0.913810 |
| Svil          | chr18:4920539-5119299     | 12.2185   | 12.4318   | 0.0250  | 0.707095 |
| Znfx1         | chr2:167035792-167063015  | 23.7829   | 24.0384   | 0.0154  | 0.865429 |
| Natd1         | chr11:60902245-60914750   | 3.6357    | 3.7114    | 0.0297  | 0.872715 |
| Plod3         | chr5:136987018-136996648  | 3.3140    | 3.3847    | 0.0305  | 0.792112 |
| Zfp27         | chr7:29893332-29906572    | 5.2942    | 5.3951    | 0.0272  | 0.772473 |
| Gm15545       | chr7:44986899-44994597    | 9.1640    | 9.2448    | 0.0127  | 0.915657 |
| Ndufb4        | chr16:37647169-37654453   | 8.5184    | 8.6670    | 0.0249  | 0.876264 |
| Ltn1          | chr16:87376650-87432606   | 19.2129   | 19.4196   | 0.0154  | 0.808802 |
| Rsb1          | chr3:103914119-103966636  | 22.5362   | 22.7614   | 0.0143  | 0.824893 |
| Zmat5         | chr11:4704677-4737669     | 13.6520   | 13.9195   | 0.0280  | 0.702588 |
| Gm12977       | chr4:133871829-133876533  | 15.2956   | 15.4730   | 0.0166  | 0.863752 |
| Dgke          | chr11:89035178-89066850   | 9.7444    | 9.9065    | 0.0238  | 0.671454 |
| Pot1a         | chr6:25743736-25809246    | 6.9180    | 7.0248    | 0.0221  | 0.521475 |
| Aimp1         | chr3:132660497-132683879  | 38.8881   | 39.1679   | 0.0103  | 0.933003 |
| Tmsb4x        | chrX:167207092-167209315  | 1306.6257 | 1334.3615 | 0.0303  | 0.900401 |
| Wdr73         | chr7:80890722-80901269    | 9.5875    | 9.7412    | 0.0229  | 0.748903 |
| Cbx6          | chr15:79823895-79834688   | 8.5525    | 8.7178    | 0.0276  | 0.841838 |
| Trmt5         | chr12:73280409-73286711   | 11.6959   | 11.7856   | 0.0110  | 0.894564 |
| Mecr          | chr4:131843469-131867786  | 6.3953    | 6.5250    | 0.0290  | 0.810290 |
| Mon2          | chr10:122992060-123076505 | 20.2681   | 20.5065   | 0.0169  | 0.621911 |
| Chac2         | chr11:30976706-30986350   | 3.8909    | 3.9029    | 0.0044  | 0.965774 |
| Smurf2        | chr11:106820065-106920715 | 27.2517   | 27.6873   | 0.0229  | 0.753020 |
| Gga3          | chr11:115584254-115604051 | 9.4186    | 9.5237    | 0.0160  | 0.884273 |
| Traf3         | chr12:111166369-111267153 | 16.3723   | 16.5569   | 0.0162  | 0.899305 |
| Mtr           | chr13:12186541-12258113   | 14.9985   | 15.1695   | 0.0164  | 0.624196 |
| Fosl2         | chr5:32136471-32157831    | 1.8693    | 1.9120    | 0.0325  | 0.891981 |
| Atp10a        | chr7:58658201-58829426    | 25.8744   | 26.3226   | 0.0248  | 0.829134 |
| Nsmce4a       | chr7:130532522-130573118  | 38.5880   | 38.9253   | 0.0126  | 0.900186 |
| B3gnt3        | chr8:71691718-71701800    | 2.8403    | 2.8672    | 0.0136  | 0.957131 |
| Tagln         | chr9:45929627-45936058    | 4.4807    | 4.5255    | 0.0144  | 0.939714 |
| Sltm          | chr9:70542919-70592237    | 56.1644   | 56.7695   | 0.0155  | 0.749330 |
| Sec22c        | chr9:121680046-121705490  | 9.6479    | 9.8218    | 0.0258  | 0.774304 |
| Csnk1e        | chr15:79417855-79443919   | 7.9641    | 8.1043    | 0.0252  | 0.792018 |
| Tmem242       | chr17:5410863-5440260     | 16.0823   | 16.3438   | 0.0233  | 0.873922 |
| Btbd9         | chr17:30215523-30576287   | 7.2948    | 7.4334    | 0.0271  | 0.784668 |
| Rab11b        | chr17:33742483-33760530   | 8.8594    | 9.0186    | 0.0257  | 0.771905 |
| C030034I22Rik | chr17:69417460-69418931   | 8.1783    | 8.2481    | 0.0123  | 0.846894 |
| Sdf2l1        | chr16:17130137-17132383   | 8.1931    | 8.2506    | 0.0101  | 0.952143 |
| Trak2         | chr1:58900448-58973430    | 19.1791   | 19.4901   | 0.0232  | 0.695506 |
| Stk16         | chr1:75210837-75215606    | 21.8002   | 22.1617   | 0.0237  | 0.640359 |
| Crem          | chr18:3266047-3337748     | 2.5162    | 2.5323    | 0.0092  | 0.935654 |
| Tubb6         | chr18:67390716-67402748   | 2.4259    | 2.4890    | 0.0371  | 0.865191 |

|               |                           |          |          |        |          |
|---------------|---------------------------|----------|----------|--------|----------|
| Zbtb26        | chr2:37432167-37443121    | 8.5320   | 8.6722   | 0.0235 | 0.596830 |
| Zc3h8         | chr2:128926267-128944077  | 9.0315   | 9.0855   | 0.0086 | 0.937940 |
| Ss18l1        | chr2:180042508-180070201  | 4.3629   | 4.4444   | 0.0267 | 0.649528 |
| Zmym6         | chr4:127077382-127124372  | 7.7366   | 7.8545   | 0.0218 | 0.580967 |
| Syf2          | chr4:134930897-134937548  | 68.7895  | 69.9080  | 0.0233 | 0.843634 |
| Snrpg         | chr6:86371582-86378902    | 43.1765  | 43.3711  | 0.0065 | 0.971354 |
| Snopc1        | chr12:73964529-73984820   | 12.4696  | 12.5826  | 0.0130 | 0.875262 |
| Psmc4         | chr9:54950789-54958030    | 28.5936  | 28.8167  | 0.0112 | 0.934183 |
| Hdac6         | chrX:7930119-7947889      | 3.9137   | 3.9907   | 0.0281 | 0.842214 |
| Slc35a5       | chr16:45139572-45158706   | 7.6810   | 7.8030   | 0.0227 | 0.715696 |
| Btla          | chr16:45224314-45252895   | 83.5286  | 84.3926  | 0.0148 | 0.864707 |
| Ppargc1b      | chr18:61298135-61400431   | 2.7935   | 2.8247   | 0.0160 | 0.942439 |
| Cops4         | chr5:100518308-100547803  | 14.5981  | 14.8323  | 0.0230 | 0.809538 |
| Nkrf          | chrX:36887539-36902899    | 4.2045   | 4.2503   | 0.0156 | 0.888015 |
| 4931431C16Rik | chr5:35581226-35588763    | 3.0260   | 3.0889   | 0.0297 | 0.864184 |
| Arntl         | chr7:113207464-113314122  | 13.9459  | 14.0517  | 0.0109 | 0.925446 |
| Insl3         | chr8:71689213-71690575    | 22.1597  | 22.3845  | 0.0146 | 0.934541 |
| Tmem260       | chr14:48446127-48515135   | 5.6130   | 5.7068   | 0.0239 | 0.714498 |
| Tbc1d22bos    | chr17:29578815-29596305   | 3.6257   | 3.7004   | 0.0294 | 0.829062 |
| Tmem138       | chr19:10570477-10577362   | 5.1235   | 5.2103   | 0.0242 | 0.830875 |
| Ralgds        | chr2:28513124-28553081    | 5.0955   | 5.1416   | 0.0130 | 0.932469 |
| 3110043O21Rik | chr4:35191284-35226175    | 3.5847   | 3.6477   | 0.0252 | 0.869454 |
| Cdkal1        | chr13:29191745-29855674   | 3.5195   | 3.5795   | 0.0244 | 0.731662 |
| Ift88         | chr14:57424061-57517936   | 1.8063   | 1.8126   | 0.0050 | 0.968548 |
| Ginm1         | chr10:7767946-7792800     | 17.1442  | 17.2492  | 0.0088 | 0.958333 |
| Kpna2         | chr11:106988628-106999541 | 2.1073   | 2.1474   | 0.0272 | 0.864480 |
| Gm6863        | chr12:96922419-96923061   | 13.7235  | 13.7645  | 0.0043 | 0.985098 |
| NA            | chr7:28399548-28598144    | 3.8772   | 3.9657   | 0.0326 | 0.874039 |
| A730017L22Rik | chr2:130873058-130906396  | 2.5094   | 2.5521   | 0.0243 | 0.763922 |
| Ccdc90b       | chr7:92561148-92582294    | 7.0594   | 7.0798   | 0.0042 | 0.986346 |
| Anapc10       | chr8:79711819-79777321    | 4.2179   | 4.2856   | 0.0230 | 0.889420 |
| Tmx3          | chr18:90510153-90543267   | 24.5908  | 24.9841  | 0.0229 | 0.804074 |
| Jup           | chr11:100368957-100397763 | 1.1365   | 1.1486   | 0.0153 | 0.908688 |
| Golga4        | chr9:118506317-118582522  | 29.9305  | 30.2933  | 0.0174 | 0.567641 |
| Mtmr6         | chr14:60265204-60302370   | 31.9521  | 32.2959  | 0.0154 | 0.819593 |
| Tcf19         | chr17:35512733-35516824   | 10.1948  | 10.2627  | 0.0096 | 0.943379 |
| BC021614      | chr19:4057477-4059295     | 60.3994  | 61.4172  | 0.0241 | 0.882907 |
| Hps1          | chr19:42755104-42779978   | 7.6359   | 7.7711   | 0.0253 | 0.835880 |
| Mbp           | chr18:82475145-82585637   | 32.0879  | 32.5787  | 0.0219 | 0.467733 |
| Phf13         | chr4:151989632-151996258  | 3.4943   | 3.5261   | 0.0131 | 0.947842 |
| Fam169b       | chr7:68273838-68363089    | 41.4470  | 42.1697  | 0.0249 | 0.796440 |
| Uqcrc2        | chr7:120635175-120659478  | 63.1550  | 63.8014  | 0.0147 | 0.853068 |
| Brd8          | chr18:34598614-34624601   | 16.6132  | 16.8719  | 0.0223 | 0.778899 |
| Napg          | chr18:62977835-62999450   | 14.1489  | 14.3644  | 0.0218 | 0.531062 |
| Spopl         | chr2:23506219-23572106    | 12.2107  | 12.4011  | 0.0223 | 0.746888 |
| Eif1ax        | chrX:159372177-159389928  | 15.5089  | 15.6478  | 0.0129 | 0.920472 |
| Wdr33         | chr18:31804056-31908987   | 24.4166  | 24.7106  | 0.0173 | 0.706131 |
| Maneal        | chr4:124855238-124862171  | 2.3421   | 2.3838   | 0.0254 | 0.879663 |
| Gm11400       | chr11:3149741-3150955     | 5.9441   | 6.0895   | 0.0349 | 0.875054 |
| Ankrd13b      | chr11:77470484-77489678   | 1.3674   | 1.3851   | 0.0185 | 0.928024 |
| Csgalnact2    | chr6:118107451-118139140  | 7.5188   | 7.6305   | 0.0213 | 0.714120 |
| Xlr4b         | chrX:73214332-73222453    | 5.6308   | 5.6938   | 0.0160 | 0.801031 |
| Vbp1          | chrX:75514298-75534942    | 31.9573  | 32.2019  | 0.0110 | 0.944696 |
| Rbm39         | chr2:156147238-156180238  | 161.3955 | 163.1395 | 0.0155 | 0.802735 |
| Pigo          | chr4:43017634-43025819    | 8.7665   | 8.9316   | 0.0269 | 0.810950 |
| Baiap2        | chr11:119942762-120006782 | 4.4250   | 4.4726   | 0.0154 | 0.811187 |
| Pms2          | chr5:143909963-143937309  | 8.6483   | 8.7421   | 0.0156 | 0.676382 |
| Trbj2-7       | chr6:41543809-41543856    | 231.3915 | 233.9631 | 0.0159 | 0.914936 |
| Cenpt         | chr8:105844677-105852008  | 11.0424  | 11.1815  | 0.0181 | 0.856646 |
| Thtpa         | chr14:55094834-55098986   | 10.5774  | 10.7433  | 0.0224 | 0.759294 |
| Prpf8         | chr11:75486815-75509449   | 78.7599  | 80.0261  | 0.0230 | 0.729245 |
| Zcchc4        | chr5:52775408-52824665    | 3.5872   | 3.6463   | 0.0236 | 0.764460 |
| Dnajc21       | chr15:10446755-10470516   | 9.7282   | 9.8867   | 0.0233 | 0.822132 |
| Ppif          | chr14:25694153-25700468   | 6.6926   | 6.7740   | 0.0174 | 0.842123 |
| Socs6         | chr18:88665223-88927481   | 3.3835   | 3.4356   | 0.0220 | 0.809126 |
| Slc39a9       | chr12:80644214-80683341   | 6.5863   | 6.7028   | 0.0253 | 0.771736 |
| Gm12183       | chr11:48751759-48753770   | 7.3534   | 7.4740   | 0.0235 | 0.825588 |
| Gm17300       | chr4:132351771-132353382  | 401.4448 | 410.4537 | 0.0320 | 0.926968 |
| Eif3c         | chr7:126546454-126566411  | 86.9258  | 88.2838  | 0.0224 | 0.718525 |
| Gosr2         | chr11:103676848-103697898 | 38.7996  | 39.2058  | 0.0150 | 0.860027 |
| Exoc5         | chr14:49012145-49066653   | 15.5117  | 15.6641  | 0.0141 | 0.890732 |

|                      |                           |          |          |        |          |
|----------------------|---------------------------|----------|----------|--------|----------|
| <i>Gm17104</i>       | chr7:30564736-30565356    | 53.7581  | 54.2935  | 0.0143 | 0.904690 |
| <i>Npc1</i>          | chr18:12189692-12236400   | 9.4699   | 9.5816   | 0.0169 | 0.835741 |
| <i>Ppcdc</i>         | chr9:57412667-57440114    | 28.9420  | 29.3829  | 0.0218 | 0.769100 |
| <i>Gm20522</i>       | chr17:35122737-35126440   | 6.2130   | 6.2461   | 0.0077 | 0.947563 |
| <i>Xyylt1</i>        | chr16:30955626-31081432   | 4.7833   | 4.8275   | 0.0133 | 0.919900 |
| <i>Ccdc93</i>        | chr1:121431048-121506460  | 9.3920   | 9.5432   | 0.0230 | 0.713849 |
| <i>P2ry10</i>        | chrX:107088491-107104974  | 61.4710  | 62.0038  | 0.0125 | 0.929901 |
| <i>Adcy9</i>         | chr16:4287528-4420498     | 0.9891   | 1.0071   | 0.0260 | 0.836124 |
| <i>Disp1</i>         | chr1:183086263-183221529  | 4.8404   | 4.9297   | 0.0264 | 0.824302 |
| <i>Mtx2</i>          | chr2:74825802-74878431    | 7.1206   | 7.1792   | 0.0118 | 0.920310 |
| <i>Mrpl47</i>        | chr3:32725396-32737147    | 8.3502   | 8.4270   | 0.0132 | 0.894877 |
| <i>Rnf130</i>        | chr11:50025345-50104758   | 15.6825  | 15.8090  | 0.0116 | 0.935498 |
| <i>Gm26735</i>       | chr13:28943047-28951671   | 11.2523  | 11.4320  | 0.0229 | 0.860827 |
| <i>Haus8</i>         | chr8:71248560-71272934    | 4.8750   | 4.9272   | 0.0154 | 0.839604 |
| <i>BC055324</i>      | chr1:16394592-163994796   | 4.8797   | 4.9525   | 0.0213 | 0.768190 |
| <i>Traf5</i>         | chr1:191997429-192092559  | 24.4341  | 24.8433  | 0.0240 | 0.808652 |
| <i>Gm11646</i>       | chr11:106051150-106051852 | 17.9502  | 18.1487  | 0.0159 | 0.931636 |
| <i>Top1mt</i>        | chr15:75657034-75678800   | 6.0122   | 6.1086   | 0.0229 | 0.870577 |
| <i>B230354K17Rik</i> | chr17:45433851-45442544   | 4.6735   | 4.7205   | 0.0144 | 0.889740 |
| <i>Msrp2</i>         | chr2:19371439-19394976    | 8.9293   | 8.9941   | 0.0104 | 0.927086 |
| <i>Actn4</i>         | chr7:28893247-28962340    | 20.2849  | 20.5302  | 0.0173 | 0.884658 |
| <i>Tmod3</i>         | chr9:75497795-75559657    | 61.9887  | 62.6299  | 0.0148 | 0.871923 |
| <i>Col20a1</i>       | chr2:180986534-181017540  | 1.5059   | 1.5406   | 0.0328 | 0.899885 |
| <i>Nsa2</i>          | chr13:97129426-97137926   | 20.1437  | 20.4583  | 0.0224 | 0.886920 |
| <i>Gtf2e2</i>        | chr8:33731913-33777173    | 12.8058  | 12.9294  | 0.0139 | 0.816746 |
| <i>Ift57</i>         | chr16:49699232-49765126   | 2.3370   | 2.3738   | 0.0226 | 0.767518 |
| <i>Chmp2b</i>        | chr16:65539132-65562697   | 15.9567  | 16.1939  | 0.0213 | 0.885998 |
| <i>Hmgcl</i>         | chr4:135946447-135962617  | 8.2972   | 8.4308   | 0.0230 | 0.835414 |
| <i>Gm20708</i>       | chr11:117809667-117839904 | 9.9126   | 10.0141  | 0.0147 | 0.866202 |
| <i>Cep78</i>         | chr19:15955773-15984989   | 3.9543   | 4.0166   | 0.0226 | 0.848755 |
| <i>Zfp292</i>        | chr4:34803112-34882960    | 49.9239  | 50.5353  | 0.0176 | 0.707210 |
| <i>Cdc26</i>         | chr4:62383653-62408642    | 3.3477   | 3.3820   | 0.0147 | 0.863601 |
| <i>Arf1</i>          | chr11:59211411-59228270   | 57.9239  | 58.8232  | 0.0222 | 0.824547 |
| <i>Sigirr</i>        | chr7:141091174-141100546  | 42.9051  | 43.4118  | 0.0169 | 0.846575 |
| <i>Reep4</i>         | chr14:70545250-70548933   | 16.1360  | 16.3431  | 0.0184 | 0.871306 |
| <i>Gm25951</i>       | chr4:140717042-140717106  | 79.9232  | 81.5665  | 0.0294 | 0.862505 |
| <i>Actn1</i>         | chr12:80167541-80260371   | 132.1872 | 134.3331 | 0.0232 | 0.769670 |
| <i>Psmb9</i>         | chr17:34181987-34187764   | 50.2932  | 50.8700  | 0.0165 | 0.854154 |
| <i>Leo1</i>          | chr9:75441523-75466432    | 16.5367  | 16.7215  | 0.0160 | 0.752379 |
| <i>Wbp5</i>          | chrX:136245078-136247139  | 10.3190  | 10.4555  | 0.0190 | 0.917881 |
| <i>Ndufb9</i>        | chr15:58933809-58939489   | 73.8780  | 75.0251  | 0.0222 | 0.900622 |
| <i>Dgat1</i>         | chr15:76502014-76511951   | 9.8303   | 9.9294   | 0.0145 | 0.903636 |
| <i>Mapk8</i>         | chr14:33377897-33447158   | 6.8920   | 6.9933   | 0.0211 | 0.478780 |
| <i>Nbeal1</i>        | chr1:60180598-6038328     | 6.2776   | 6.3510   | 0.0168 | 0.831129 |
| <i>6330409D20Rik</i> | chr2:32732619-32741016    | 6.5999   | 6.6789   | 0.0172 | 0.946864 |
| <i>Bcas2</i>         | chr3:103171654-103179166  | 21.4852  | 21.8032  | 0.0212 | 0.813566 |
| <i>Atp5f1</i>        | chr3:105942697-105960099  | 31.8043  | 32.1242  | 0.0144 | 0.897707 |
| <i>Map3k2</i>        | chr18:32163088-32236751   | 18.2363  | 18.4528  | 0.0170 | 0.764312 |
| <i>Gm13562</i>       | chr2:26352644-26371952    | 10.4580  | 10.5896  | 0.0180 | 0.904477 |
| <i>Pop4</i>          | chr7:38262819-38271348    | 21.8577  | 22.0622  | 0.0134 | 0.878324 |
| <i>Mrpl41</i>        | chr2:24974116-24975098    | 32.0098  | 32.2805  | 0.0121 | 0.929399 |
| <i>Usp33</i>         | chr3:152346477-152393612  | 22.4157  | 22.7434  | 0.0209 | 0.712294 |
| <i>Gtpbp10</i>       | chr8:5537453-5559538      | 1.6214   | 1.6313   | 0.0088 | 0.952615 |
| <i>Dnase2a</i>       | chr8:84908559-84922915    | 1.6997   | 1.7291   | 0.0247 | 0.884256 |
| <i>Rnf25</i>         | chr1:74593747-74601397    | 16.2356  | 16.4820  | 0.0217 | 0.806414 |
| <i>Fam208b</i>       | chr13:3566035-3611108     | 40.5234  | 41.0290  | 0.0179 | 0.769285 |
| <i>B4galt1</i>       | chr4:40804601-40854005    | 36.3900  | 36.8549  | 0.0183 | 0.799563 |
| <i>Frip1</i>         | chr11:54438198-54518235   | 16.7160  | 16.9550  | 0.0205 | 0.731305 |
| <i>Fam57a</i>        | chr11:76179670-76214827   | 5.1596   | 5.2282   | 0.0190 | 0.808175 |
| <i>Wdr25</i>         | chr12:108894271-109028452 | 1.2190   | 1.2352   | 0.0190 | 0.874554 |
| <i>Crebl2</i>        | chr6:134830153-134858931  | 14.9097  | 15.0732  | 0.0157 | 0.868450 |
| <i>Ick</i>           | chr9:78109191-78172107    | 1.6282   | 1.6558   | 0.0243 | 0.818649 |
| <i>Impdh2</i>        | chr9:108560533-108565519  | 9.4155   | 9.5769   | 0.0245 | 0.795591 |
| <i>Tmem55b</i>       | chr14:50926069-50930856   | 20.7732  | 21.0307  | 0.0178 | 0.782695 |
| <i>Ssh3</i>          | chr19:4261667-4269172     | 5.0396   | 5.0947   | 0.0157 | 0.902202 |
| <i>Gm13402</i>       | chr2:29349841-29396459    | 11.5694  | 11.8095  | 0.0296 | 0.875104 |
| <i>1700029J07Rik</i> | chr8:45953605-45975252    | 1.6095   | 1.6325   | 0.0205 | 0.881773 |
| <i>Cdc123</i>        | chr2:5794293-5845164      | 12.5835  | 12.7609  | 0.0202 | 0.749988 |
| <i>NA</i>            | chr4:136343974-136345981  | 6.9410   | 7.0280   | 0.0180 | 0.912876 |
| <i>Zfp958</i>        | chr8:4625839-4629380      | 18.1809  | 18.3617  | 0.0143 | 0.877087 |
| <i>A530040E14Rik</i> | chr1:85105945-85114035    | 1.9195   | 1.9528   | 0.0248 | 0.946062 |

|                      |                           |          |          |        |          |
|----------------------|---------------------------|----------|----------|--------|----------|
| <i>Gpr146</i>        | chr5:139377741-139396415  | 17.2688  | 17.4938  | 0.0187 | 0.832626 |
| <i>Map2k7</i>        | chr8:4238739-4251423      | 18.2617  | 18.5514  | 0.0227 | 0.741169 |
| <i>Yipf6</i>         | chrX:98936315-98949017    | 10.7578  | 10.8834  | 0.0167 | 0.700853 |
| <i>Ero1l</i>         | chr14:45283091-45318572   | 7.0473   | 7.1496   | 0.0208 | 0.827547 |
| <i>Obfc1</i>         | chr19:47501032-47537507   | 8.8150   | 8.9143   | 0.0162 | 0.837245 |
| <i>Slc30a1</i>       | chr1:191906766-191913247  | 10.9998  | 11.1747  | 0.0228 | 0.835776 |
| <i>Spata5</i>        | chr3:37419895-37579096    | 18.6598  | 18.9382  | 0.0214 | 0.412786 |
| <i>Ddx20</i>         | chr3:105678269-105687574  | 10.3935  | 10.5008  | 0.0148 | 0.863975 |
| <i>Trbj1-6</i>       | chr6:41535553-41535606    | 445.1992 | 450.4563 | 0.0169 | 0.741474 |
| <i>Fam49b</i>        | chr15:63929096-64060448   | 51.0156  | 51.7455  | 0.0205 | 0.835834 |
| <i>Ppapdc2</i>       | chr19:28963919-28966798   | 8.8356   | 8.9543   | 0.0192 | 0.808173 |
| <i>Nudt2</i>         | chr4:41465150-41480926    | 5.0570   | 5.1219   | 0.0184 | 0.940008 |
| <i>Ctsw</i>          | chr19:5465239-5468498     | 54.9225  | 55.4366  | 0.0134 | 0.948342 |
| <i>Nploc4</i>        | chr11:120380369-120437708 | 14.5090  | 14.7292  | 0.0217 | 0.758940 |
| <i>Snord100</i>      | chr10:23785749-23785823   | 70.5484  | 71.6518  | 0.0224 | 0.782778 |
| <i>Wnk4</i>          | chr11:101260566-101277409 | 0.9934   | 1.0125   | 0.0274 | 0.888659 |
| <i>Oas1c</i>         | chr5:120800193-120812514  | 10.3677  | 10.4967  | 0.0178 | 0.878750 |
| <i>Gm20479</i>       | chr7:27352648-27357419    | 17.4776  | 17.6879  | 0.0173 | 0.882798 |
| <i>Prickle1</i>      | chr15:93499113-93595891   | 1.7896   | 1.8267   | 0.0295 | 0.853228 |
| <i>Ccser2</i>        | chr14:36874935-36968777   | 17.8993  | 18.1183  | 0.0175 | 0.765232 |
| <i>Acox3</i>         | chr5:35583039-35613801    | 8.0850   | 8.1892   | 0.0185 | 0.831460 |
| <i>Cmtm4</i>         | chr8:104348190-104395807  | 3.4816   | 3.5213   | 0.0163 | 0.830893 |
| <i>Sephs2</i>        | chr7:127272560-127273919  | 21.5835  | 21.8398  | 0.0170 | 0.843868 |
| <i>Paqr8</i>         | chr1:20890621-20938755    | 3.6432   | 3.6804   | 0.0146 | 0.903680 |
| <i>Fam162a</i>       | chr16:36043843-36071515   | 27.0151  | 27.3979  | 0.0203 | 0.917658 |
| <i>G2e3</i>          | chr12:51348060-51376986   | 9.0113   | 9.1366   | 0.0199 | 0.852799 |
| <i>6530409C15Rik</i> | chr6:28215554-28260862    | 7.2123   | 7.3095   | 0.0193 | 0.812914 |
| <i>Rnf141</i>        | chr7:110800431-110844457  | 4.4934   | 4.5642   | 0.0225 | 0.768655 |
| <i>Thap1</i>         | chr8:26158211-26162940    | 6.1008   | 6.1835   | 0.0194 | 0.852947 |
| <i>Slc25a36</i>      | chr9:97075596-97111157    | 17.7024  | 17.9135  | 0.0171 | 0.708505 |
| <i>Adck5</i>         | chr15:76576357-76595816   | 6.8888   | 7.0045   | 0.0240 | 0.789659 |
| <i>Gga1</i>          | chr15:78877189-78894585   | 16.6056  | 16.8366  | 0.0199 | 0.878283 |
| <i>Nop9</i>          | chr14:55745692-55755500   | 11.6392  | 11.7982  | 0.0196 | 0.721968 |
| <i>Wiz</i>           | chr17:32354054-32389401   | 2.5343   | 2.5706   | 0.0205 | 0.876627 |
| <i>Atat1</i>         | chr17:35897594-35910075   | 1.0082   | 1.0177   | 0.0136 | 0.934602 |
| <i>NA</i>            | chr3:40950630-40977793    | 14.2124  | 14.3958  | 0.0185 | 0.896150 |
| <i>Suv420h2</i>      | chr7:4740114-4747514      | 7.5709   | 7.6737   | 0.0194 | 0.834571 |
| <i>Pigyl</i>         | chr9:22156845-22158358    | 6.0439   | 6.1348   | 0.0215 | 0.925715 |
| <i>Anxa7</i>         | chr14:20455260-20480133   | 24.5435  | 24.8011  | 0.0151 | 0.887904 |
| <i>Slc39a6</i>       | chr18:24579880-24603817   | 7.6475   | 7.7686   | 0.0227 | 0.814088 |
| <i>Ogfr</i>          | chr2:180589244-180595836  | 47.7776  | 48.3724  | 0.0178 | 0.830459 |
| <i>Gstcd</i>         | chr3:132981752-133092033  | 3.3803   | 3.4308   | 0.0214 | 0.826086 |
| <i>Zfyve1</i>        | chr12:83546940-83597147   | 14.6430  | 14.8212  | 0.0175 | 0.710852 |
| <i>Lyrn9</i>         | chr11:78826583-78846870   | 4.9215   | 4.9826   | 0.0178 | 0.793337 |
| <i>Etohd2</i>        | chr13:59769964-59773680   | 17.7154  | 17.9191  | 0.0165 | 0.794575 |
| <i>Tpcn1</i>         | chr5:120534159-120588613  | 8.6405   | 8.7919   | 0.0251 | 0.863575 |
| <i>Nlrc5</i>         | chr8:94472762-94527272    | 86.7984  | 87.9260  | 0.0186 | 0.873338 |
| <i>Tmem71</i>        | chr15:66526211-66561046   | 100.0712 | 101.5014 | 0.0205 | 0.812312 |
| <i>Terc</i>          | chr3:96414436-96414859    | 39.5480  | 40.2054  | 0.0238 | 0.888143 |
| <i>Rab9</i>          | chrX:166457252-166479867  | 11.3139  | 11.4679  | 0.0195 | 0.840610 |
| <i>Cbx1</i>          | chr11:96789126-96808640   | 16.5650  | 16.7992  | 0.0203 | 0.805893 |
| <i>Gm26517</i>       | chr12:51888014-51889459   | 8.7035   | 8.8451   | 0.0233 | 0.816072 |
| <i>Sav1</i>          | chr12:69965011-69987002   | 12.8336  | 13.0260  | 0.0215 | 0.808295 |
| <i>Pcgf3</i>         | chr5:108461231-108506976  | 6.4210   | 6.5187   | 0.0218 | 0.718557 |
| <i>Lats2</i>         | chr14:57642076-57758388   | 16.6604  | 16.8667  | 0.0178 | 0.846885 |
| <i>Uqcc2</i>         | chr17:27122662-27133916   | 18.5391  | 18.7194  | 0.0140 | 0.918458 |
| <i>Dnajc4</i>        | chr19:6987910-6992503     | 20.5782  | 20.7940  | 0.0151 | 0.907626 |
| <i>Anapc1</i>        | chr2:128610103-128687391  | 18.5326  | 18.7753  | 0.0188 | 0.788786 |
| <i>Rbbp4</i>         | chr4:129307099-129335370  | 23.3610  | 23.6860  | 0.0199 | 0.708049 |
| <i>Serp1</i>         | chr3:58521968-58525873    | 72.5879  | 73.3807  | 0.0157 | 0.897780 |
| <i>Tmem69</i>        | chr4:116551632-116555936  | 5.0132   | 5.0686   | 0.0159 | 0.916621 |
| <i>Hsp90aa1</i>      | chr12:110690604-110702728 | 15.6417  | 15.8257  | 0.0169 | 0.929586 |
| <i>Gstz1</i>         | chr12:87147706-87164721   | 7.6752   | 7.7808   | 0.0197 | 0.869555 |
| <i>Zfp949</i>        | chr9:88548019-88571086    | 8.4155   | 8.5352   | 0.0204 | 0.794632 |
| <i>D030055H07Rik</i> | chr9:106148686-106160201  | 2.7198   | 2.7574   | 0.0198 | 0.879218 |
| <i>Cnot10</i>        | chr9:114585877-114640200  | 23.8413  | 24.1722  | 0.0199 | 0.615235 |
| <i>Dctn4</i>         | chr18:60526220-60558762   | 23.0445  | 23.3254  | 0.0175 | 0.722033 |
| <i>Fam107b</i>       | chr2:3613757-3782142      | 138.0537 | 139.9512 | 0.0197 | 0.859569 |
| <i>Mical1</i>        | chr10:41476313-41487032   | 27.1380  | 27.5308  | 0.0207 | 0.799605 |
| <i>Ttll5</i>         | chr12:85824658-86061893   | 1.8154   | 1.8391   | 0.0187 | 0.876760 |
| <i>Txnrd3</i>        | chr6:89643987-89675529    | 1.5171   | 1.5310   | 0.0132 | 0.948938 |

|                      |                           |          |          |        |          |
|----------------------|---------------------------|----------|----------|--------|----------|
| <i>Ddias</i>         | chr7:92857528-92874213    | 1.5091   | 1.5238   | 0.0139 | 0.946460 |
| <i>Fam210b</i>       | chr2:172345564-172355749  | 3.3696   | 3.4170   | 0.0201 | 0.806635 |
| <i>Fam114a2</i>      | chr11:57482992-57518617   | 31.6255  | 32.0629  | 0.0198 | 0.586017 |
| <i>Myo18a</i>        | chr11:77763245-77865980   | 7.1219   | 7.2200   | 0.0197 | 0.852760 |
| <i>Pigw</i>          | chr11:84876314-84880285   | 4.5602   | 4.6262   | 0.0207 | 0.863898 |
| <i>Pecam1</i>        | chr11:106654216-106750628 | 92.3848  | 93.5485  | 0.0181 | 0.736468 |
| <i>Fam104a</i>       | chr11:113661318-113684155 | 14.9176  | 15.1320  | 0.0206 | 0.880441 |
| <i>Gemin2</i>        | chr12:59013392-59028470   | 5.3259   | 5.3773   | 0.0139 | 0.931024 |
| <i>Ncf1</i>          | chr5:134220052-134229625  | 2.2113   | 2.2344   | 0.0150 | 0.888389 |
| <i>Stx1a</i>         | chr5:135023481-135051100  | 4.9183   | 4.9993   | 0.0236 | 0.806623 |
| <i>Pop7</i>          | chr5:137501437-137502518  | 12.5171  | 12.6747  | 0.0181 | 0.888327 |
| <i>Tbcb</i>          | chr7:30224130-30232272    | 15.6516  | 15.8651  | 0.0196 | 0.871904 |
| <i>Tmem80</i>        | chr7:141327738-141337156  | 9.3632   | 9.4774   | 0.0175 | 0.893796 |
| <i>Slc25a15</i>      | chr8:22375553-22398621    | 3.4199   | 3.4675   | 0.0200 | 0.826835 |
| <i>Rab4a</i>         | chr8:123805984-123835287  | 5.7113   | 5.8065   | 0.0239 | 0.868390 |
| <i>Vwa5a</i>         | chr9:38718267-38743337    | 10.3999  | 10.5202  | 0.0166 | 0.908431 |
| <i>Mtm1</i>          | chrX:71210766-71315691    | 1.3014   | 1.3166   | 0.0167 | 0.848526 |
| <i>Cmtr1</i>         | chr17:29549798-29705979   | 27.7372  | 28.0938  | 0.0184 | 0.805640 |
| <i>Spidr</i>         | chr16:15889226-16146851   | 8.8687   | 8.9680   | 0.0161 | 0.891945 |
| <i>Kat5</i>          | chr19:5603016-5610094     | 35.2245  | 35.6683  | 0.0181 | 0.756573 |
| <i>Aldh9a1</i>       | chr1:167349990-167368530  | 16.2628  | 16.4702  | 0.0183 | 0.742754 |
| <i>Dtd1</i>          | chr2:144599896-144768758  | 9.7396   | 9.8302   | 0.0134 | 0.933245 |
| <i>Mbnl1</i>         | chr3:60501251-60629748    | 319.9744 | 324.4763 | 0.0202 | 0.760737 |
| <i>Spsb1</i>         | chr4:149896282-149955043  | 5.5352   | 5.6325   | 0.0251 | 0.876926 |
| <i>Rps25-ps1</i>     | chr6:145266326-145266825  | 7.9834   | 8.0647   | 0.0146 | 0.947885 |
| <i>Faddos</i>        | chr7:144567354-144581512  | 3.7775   | 3.8107   | 0.0126 | 0.948476 |
| <i>4933416M07Rik</i> | chr8:27142909-27149671    | 4.6305   | 4.6915   | 0.0189 | 0.916635 |
| <i>Bckdhb</i>        | chr9:83925149-84124239    | 5.9867   | 6.0942   | 0.0257 | 0.899066 |
| <i>Yme1l1</i>        | chr2:23156368-23199260    | 41.9947  | 42.4898  | 0.0169 | 0.859303 |
| <i>Ptpmt1</i>        | chr2:90908715-90918258    | 9.9833   | 10.1048  | 0.0175 | 0.825423 |
| <i>Surf1</i>         | chr2:26913382-26916530    | 29.5748  | 29.9140  | 0.0165 | 0.809221 |
| <i>Mapk1</i>         | chr16:16983381-17047453   | 35.0488  | 35.4930  | 0.0182 | 0.700397 |
| <i>Rpl35</i>         | chr2:39001579-39005624    | 27.7785  | 28.0649  | 0.0148 | 0.954378 |
| <i>Klc1</i>          | chr12:111758848-111807844 | 16.5660  | 16.8143  | 0.0215 | 0.650599 |
| <i>Gnl2</i>          | chr4:125016584-125055380  | 22.3665  | 22.6447  | 0.0178 | 0.671070 |
| <i>Adck3</i>         | chr1:180165237-180199602  | 3.8583   | 3.9011   | 0.0159 | 0.920374 |
| <i>Epha1</i>         | chr6:42358486-42373268    | 1.4015   | 1.4307   | 0.0298 | 0.855711 |
| <i>Bnip2</i>         | chr9:69989465-70008317    | 35.8668  | 36.3015  | 0.0174 | 0.835493 |
| <i>Fam53c</i>        | chr18:34758905-34773760   | 6.0293   | 6.1229   | 0.0222 | 0.891679 |
| <i>Ttc16</i>         | chr2:32757025-32775633    | 0.7420   | 0.7530   | 0.0213 | 0.935751 |
| <i>Ssr4</i>          | chrX:73787027-73790830    | 21.0841  | 21.3355  | 0.0171 | 0.772574 |
| <i>Ppp1r21</i>       | chr17:88530123-88588365   | 15.8753  | 16.0720  | 0.0178 | 0.800664 |
| <i>Commd3</i>        | chr2:18672383-18676231    | 30.0879  | 30.4730  | 0.0183 | 0.900098 |
| <i>Gm13331</i>       | chr2:23508859-23509307    | 12.4160  | 12.6322  | 0.0249 | 0.877193 |
| <i>Sec22b</i>        | chr3:97901189-97923276    | 10.4500  | 10.5888  | 0.0190 | 0.641838 |
| <i>Rnf13</i>         | chr3:57736065-57835233    | 22.8951  | 23.1591  | 0.0165 | 0.854783 |
| <i>Gm12764</i>       | chr7:34388664-34394779    | 19.5465  | 19.7989  | 0.0185 | 0.842456 |
| <i>Kctd10</i>        | chr5:114363566-114380515  | 32.4439  | 32.8654  | 0.0186 | 0.762484 |
| <i>Tigd2</i>         | chr6:59208869-59212033    | 34.9847  | 35.4423  | 0.0187 | 0.758421 |
| <i>As3mt</i>         | chr19:46707442-46741095   | 4.3016   | 4.3535   | 0.0173 | 0.918667 |
| <i>1700066M21Rik</i> | chr1:57377619-57385423    | 4.8959   | 4.9552   | 0.0174 | 0.897791 |
| <i>Gm17275</i>       | chr1:180802567-180809483  | 22.3622  | 22.6237  | 0.0168 | 0.906835 |
| <i>Ccdc23</i>        | chr4:119195305-119201298  | 12.6098  | 12.7832  | 0.0197 | 0.887486 |
| <i>Rps12</i>         | chr10:23785210-23787195   | 18.0631  | 18.2731  | 0.0167 | 0.917737 |
| <i>Sun1</i>          | chr5:139200636-139249840  | 16.2990  | 16.5070  | 0.0183 | 0.834306 |
| <i>Rab3a</i>         | chr8:70754678-70758677    | 5.7507   | 5.8389   | 0.0220 | 0.865211 |
| <i>Isg20l2</i>       | chr3:87930313-87940686    | 30.5893  | 30.9730  | 0.0180 | 0.630412 |
| <i>Slu7</i>          | chr11:43433743-43447981   | 35.5505  | 36.0164  | 0.0188 | 0.773265 |
| <i>Trpv6</i>         | chr6:41620620-41636405    | 2.2934   | 2.3275   | 0.0213 | 0.903334 |
| <i>C230052I12Rik</i> | chr7:35392274-35396817    | 7.7831   | 7.8929   | 0.0202 | 0.824385 |
| <i>Mylpf</i>         | chr7:127211607-127214298  | 10.8443  | 10.9926  | 0.0196 | 0.858083 |
| <i>Tnfrsf26</i>      | chr7:143607684-143627845  | 33.3877  | 33.8323  | 0.0191 | 0.858933 |
| <i>Trav14-1</i>      | chr14:53554056-53554554   | 37.4016  | 37.8830  | 0.0185 | 0.879745 |
| <i>Oard1</i>         | chr17:48410013-48417266   | 30.1066  | 30.4840  | 0.0180 | 0.845973 |
| <i>Fyttd1</i>        | chr16:32877499-32908963   | 11.5853  | 11.7208  | 0.0168 | 0.856144 |
| <i>2500004C02Rik</i> | chr2:153341156-153346073  | 2.9365   | 2.9736   | 0.0181 | 0.896028 |
| <i>Slc35a1</i>       | chr4:34663256-34687438    | 8.2449   | 8.3769   | 0.0229 | 0.789961 |
| <i>Ywhah</i>         | chr5:33018815-33027966    | 18.1369  | 18.3828  | 0.0194 | 0.830556 |
| <i>Hscb</i>          | chr5:110829069-110839777  | 15.5671  | 15.7430  | 0.0162 | 0.929410 |
| <i>Abhd2</i>         | chr7:79273200-79365508    | 27.4656  | 27.8657  | 0.0209 | 0.803708 |
| <i>Ubox5</i>         | chr2:130590001-130630038  | 5.8904   | 5.9691   | 0.0191 | 0.791986 |



|                      |                          |         |         |         |          |
|----------------------|--------------------------|---------|---------|---------|----------|
| <i>Bloc1s2</i>       | chr19:44139265-44146446  | 5.5773  | 5.6276  | 0.0130  | 0.937786 |
| <i>Cdk8</i>          | chr5:146231229-146302874 | 7.4754  | 7.5709  | 0.0183  | 0.766361 |
| <i>3830406C13Rik</i> | chr14:12284208-12303231  | 11.1909 | 11.3312 | 0.0180  | 0.870882 |
| <i>Wapal</i>         | chr14:34673927-34747983  | 64.7307 | 65.5500 | 0.0181  | 0.814637 |
| <i>Rpl36</i>         | chr17:56613394-56614243  | 14.3102 | 14.4977 | 0.0188  | 0.909027 |
| <i>Pitpnm1</i>       | chr19:4099997-4113965    | 40.5278 | 41.0891 | 0.0198  | 0.880896 |
| <i>Ate1</i>          | chr7:130391525-130519961 | 22.2035 | 22.4843 | 0.0181  | 0.690767 |
| <i>Dnaja2</i>        | chr8:85537639-85555271   | 60.0867 | 60.8286 | 0.0177  | 0.842202 |
| <i>Gm26510</i>       | chr17:70874351-70924996  | 7.9180  | 8.0188  | 0.0182  | 0.847216 |
| <i>Fdx1l</i>         | chr9:21067519-21073514   | 23.6838 | 24.0491 | 0.0221  | 0.851509 |
| <i>Snx12</i>         | chrX:101097785-101222563 | 9.9911  | 10.1098 | 0.0170  | 0.846692 |
| <i>Suclg1</i>        | chr6:73248381-73276911   | 13.5850 | 13.7678 | 0.0193  | 0.708833 |
| <i>Fsd2</i>          | chr7:81533307-81566944   | 3.3410  | 3.3868  | 0.0196  | 0.959841 |
| <i>Fam65a</i>        | chr8:105605228-105622194 | 2.8711  | 2.9191  | 0.0239  | 0.914605 |
| <i>Nvl</i>           | chr1:181093422-181144157 | 26.8880 | 27.2484 | 0.0192  | 0.788008 |
| <i>Golph3l</i>       | chr3:95588933-95619247   | 21.9152 | 22.1955 | 0.0183  | 0.815463 |
| <i>2310039H08Rik</i> | chr17:46772634-46773407  | 20.1206 | 20.3949 | 0.0195  | 0.840911 |
| <i>Msh2</i>          | chr17:87672329-87723713  | 17.0310 | 17.2430 | 0.0178  | 0.798037 |
| <i>Slc52a2</i>       | chr15:76538942-76542130  | 10.3363 | 10.4763 | 0.0194  | 0.855069 |
| <i>Lrrc8b</i>        | chr5:105415774-105486189 | 5.5739  | 5.6632  | 0.0229  | 0.874664 |
| <i>Zfp677</i>        | chr17:21383747-21399265  | 11.6612 | 11.7979 | 0.0168  | 0.893761 |
| <i>Rnmt</i>          | chr18:68300354-68324852  | 11.5023 | 11.6528 | 0.0188  | 0.705161 |
| <i>Tmem170b</i>      | chr13:41606215-41641347  | 4.6082  | 4.6779  | 0.0217  | 0.865841 |
| <i>Capg</i>          | chr6:72544390-72562983   | 17.4668 | 17.6906 | 0.0184  | 0.921352 |
| <i>Gpr107</i>        | chr2:31152315-31219548   | 7.5353  | 7.6425  | 0.0204  | 0.798786 |
| <i>2610507B11Rik</i> | chr11:78261751-78290623  | 35.2276 | 35.7331 | 0.0206  | 0.701989 |
| <i>Hsd17b4</i>       | chr18:50128200-50196269  | 23.9393 | 24.2433 | 0.0182  | 0.805395 |
| <i>Adcy3</i>         | chr12:4133102-4213525    | 8.7844  | 8.9181  | 0.0218  | 0.880355 |
| <i>Gtf2ird1</i>      | chr5:134357668-134456716 | 4.4020  | 4.4652  | 0.0206  | 0.864525 |
| <i>Cbr1</i>          | chr16:93607836-93610505  | 26.9735 | 27.3167 | 0.0182  | 0.882724 |
| <i>Irak4</i>         | chr15:94543642-94581815  | 10.6340 | 10.7791 | 0.0196  | 0.773367 |
| <i>Nfyc</i>          | chr4:120757437-120831572 | 10.4657 | 10.6085 | 0.0196  | 0.800955 |
| <i>Nr3c1</i>         | chr18:39410544-39491301  | 41.8554 | 42.4228 | 0.0194  | 0.773290 |
| <i>Ccdc170</i>       | chr10:4482501-4562231    | 0.2744  | 0.2197  | -0.3206 | 0.357132 |
| <i>Gm10097</i>       | chr10:5069191-5071975    | 0.6341  | 0.7166  | 0.1765  | 0.382211 |
| <i>Syne1</i>         | chr10:5336948-5550692    | 0.2345  | 0.3414  | 0.5420  | 0.237228 |
| <i>Lrp11</i>         | chr10:7589799-7625483    | 0.6504  | 0.6307  | -0.0443 | 0.878034 |
| <i>B430219N15Rik</i> | chr10:7780184-7781357    | 2.4054  | 2.3593  | -0.0279 | 0.742258 |
| <i>NA</i>            | chr10:7792522-7792822    | 4.7519  | 4.3362  | -0.1321 | 0.658577 |
| <i>Gm15560</i>       | chr10:7808115-7808758    | 2.9416  | 2.6680  | -0.1408 | 0.671905 |
| <i>Sash1</i>         | chr10:8722218-8886070    | 0.1578  | 0.2986  | 0.9203  | 0.144999 |
| <i>Gm16577</i>       | chr10:11212279-11212979  | 4.6619  | 5.0582  | 0.1177  | 0.492296 |
| <i>Txlnb</i>         | chr10:17796225-17845665  | 0.1649  | 0.2328  | 0.4973  | 0.061163 |
| <i>Ect2l</i>         | chr10:18129021-18210890  | 0.3726  | 0.3574  | -0.0602 | 0.893313 |
| <i>Gm10827</i>       | chr10:18235052-18238060  | 0.3350  | 0.3667  | 0.1305  | 0.645107 |
| <i>Mtfr2</i>         | chr10:20347818-20361669  | 0.2695  | 0.2538  | -0.0867 | 0.815307 |
| <i>1700021A07Rik</i> | chr10:21425341-21425650  | 4.8593  | 6.4303  | 0.4041  | 0.097634 |
| <i>Gm26581</i>       | chr10:22212652-22217241  | 0.3365  | 0.5139  | 0.6110  | 0.066646 |
| <i>Gm1972</i>        | chr10:22224279-22253819  | 0.7341  | 1.2467  | 0.7640  | 0.183137 |
| <i>Gm26528</i>       | chr10:22281453-22281736  | 4.5189  | 7.3701  | 0.7057  | 0.118934 |
| <i>Gm5421</i>        | chr10:22343438-22345792  | 1.4636  | 1.7077  | 0.2225  | 0.213258 |
| <i>Arg1</i>          | chr10:24915207-24927470  | 0.6259  | 0.8351  | 0.4162  | 0.423008 |
| <i>Akap7</i>         | chr10:25169089-25307870  | 0.7403  | 0.9041  | 0.2884  | 0.168504 |
| <i>Samd3</i>         | chr10:26229706-26272172  | 0.5195  | 0.7294  | 0.4896  | 0.079938 |
| <i>Ptprk</i>         | chr10:28074819-28597397  | 0.2667  | 0.1970  | -0.4369 | 0.191025 |
| <i>Gm25596</i>       | chr10:29349584-29349691  | 15.9652 | 18.0022 | 0.1732  | 0.608597 |
| <i>Gm10275</i>       | chr10:29698745-29699379  | 4.6773  | 4.3936  | -0.0903 | 0.694527 |
| <i>Cenpw</i>         | chr10:30196010-30200540  | 0.9998  | 1.3278  | 0.4094  | 0.275402 |
| <i>Gm5422</i>        | chr10:31248139-31251045  | 0.3386  | 0.3016  | -0.1668 | 0.542850 |
| <i>Tube1</i>         | chr10:39134022-39151058  | 1.0055  | 1.1071  | 0.1389  | 0.426782 |
| <i>Gm6963</i>        | chr10:39424617-39424996  | 3.9782  | 5.2555  | 0.4017  | 0.543868 |
| <i>Gm16210</i>       | chr10:39752258-39752868  | 2.8907  | 3.3350  | 0.2063  | 0.431603 |
| <i>Gm26824</i>       | chr10:39864858-39866332  | 1.8903  | 2.4018  | 0.3455  | 0.180587 |
| <i>BC021785</i>      | chr10:39958060-39986646  | 0.2269  | 0.1407  | -0.6889 | 0.069642 |
| <i>Cdk19os</i>       | chr10:40348507-40350103  | 1.4405  | 1.3977  | -0.0435 | 0.826849 |
| <i>Ccdc162</i>       | chr10:41538845-41709300  | 0.2875  | 0.3702  | 0.3647  | 0.139203 |
| <i>Gm26464</i>       | chr10:42820462-42820767  | 3.3443  | 2.6147  | -0.3551 | 0.366406 |
| <i>Rps19-ps11</i>    | chr10:43373487-43373920  | 1.4467  | 1.4171  | -0.0299 | 0.948712 |
| <i>Cd24a</i>         | chr10:43579168-43584262  | 1.4233  | 1.5857  | 0.1559  | 0.479723 |
| <i>Gp49a</i>         | chr10:51480631-51486316  | 0.6481  | 1.5504  | 1.2584  | 0.301467 |
| <i>Lilrb4</i>        | chr10:51480639-51496613  | 1.2096  | 2.2688  | 0.9074  | 0.379680 |

|               |                         |         |         |         |          |
|---------------|-------------------------|---------|---------|---------|----------|
| Gm26741       | chr10:52358766-52358853 | 15.8315 | 21.5501 | 0.4449  | 0.163026 |
| Pln           | chr10:53337685-53345999 | 0.4923  | 0.6080  | 0.3046  | 0.289968 |
| Pkib          | chr10:57631980-57741112 | 0.0803  | 0.1387  | 0.7883  | 0.027531 |
| Ccdc138       | chr10:58497969-58576242 | 1.1154  | 1.1631  | 0.0604  | 0.700780 |
| NA            | chr10:59221952-59226431 | 0.5546  | 0.7777  | 0.4877  | 0.196396 |
| Sowahc        | chr10:59221952-59226434 | 0.5540  | 0.7769  | 0.4877  | 0.196396 |
| Chst3         | chr10:60181531-60219260 | 0.3590  | 0.4531  | 0.3361  | 0.277734 |
| Gm17455       | chr10:60399725-60403556 | 2.7975  | 2.5468  | -0.1355 | 0.463467 |
| Gm5424        | chr10:62071014-62072609 | 2.1922  | 2.1572  | -0.0232 | 0.741094 |
| Hk1os         | chr10:62340255-62363367 | 0.7428  | 0.8589  | 0.2094  | 0.466360 |
| 4930507D05Rik | chr10:62449488-62451322 | 1.0388  | 0.9325  | -0.1557 | 0.671541 |
| Stox1         | chr10:62659042-62726128 | 0.3584  | 0.4485  | 0.3235  | 0.260760 |
| Dna2          | chr10:62947025-62974185 | 0.4999  | 0.8483  | 0.7628  | 0.010694 |
| Gm16135       | chr10:62998778-62999689 | 2.0915  | 2.4240  | 0.2129  | 0.329346 |
| NA            | chr10:63024314-63058813 | 0.7471  | 0.7153  | -0.0627 | 0.781510 |
| Dnajc12       | chr10:63382442-63408840 | 0.9468  | 0.7261  | -0.3828 | 0.190022 |
| 1700040L02Rik | chr10:68430952-68541896 | 0.5671  | 0.6483  | 0.1930  | 0.687197 |
| Gm6419        | chr10:74862987-74863419 | 2.5923  | 2.5071  | -0.0482 | 0.902163 |
| Gm9985        | chr10:75590141-75590653 | 7.0568  | 7.2397  | 0.0369  | 0.820584 |
| Gstt3         | chr10:75774114-75781414 | 0.3681  | 0.4198  | 0.1897  | 0.766746 |
| Derl3         | chr10:75893397-75895941 | 0.9612  | 1.1975  | 0.3171  | 0.258184 |
| Gm867         | chr10:75937720-75940672 | 1.2704  | 1.2894  | 0.0213  | 0.936908 |
| Vpreb3        | chr10:75943056-75949657 | 0.2510  | 0.4873  | 0.9568  | 0.383949 |
| Mir678        | chr10:76207325-76207409 | 8.4465  | 5.4295  | -0.6375 | 0.007099 |
| Gm16240       | chr10:76293164-76294860 | 1.3191  | 1.5183  | 0.2029  | 0.623152 |
| 2610028H24Rik | chr10:76449080-76461110 | 0.6766  | 0.4884  | -0.4703 | 0.171901 |
| 4930483K19Rik | chr10:76545810-76562226 | 1.8670  | 1.8122  | -0.0430 | 0.831514 |
| Pcbp3         | chr10:76761856-76961887 | 0.6316  | 1.0213  | 0.6934  | 0.091046 |
| Col18a1       | chr10:77052177-77166548 | 0.1074  | 0.1477  | 0.4594  | 0.281084 |
| Adarb1        | chr10:77290725-77418270 | 0.1582  | 0.1743  | 0.1395  | 0.639911 |
| Syde1         | chr10:78584502-78591964 | 1.0472  | 0.9604  | -0.1248 | 0.619943 |
| Gzmm          | chr10:79689019-79695261 | 1.5124  | 1.7179  | 0.1838  | 0.310617 |
| Palm          | chr10:79793571-79820896 | 0.5013  | 0.5788  | 0.2073  | 0.605390 |
| Kiss1r        | chr10:79916970-79922273 | 0.6491  | 0.4837  | -0.4245 | 0.249853 |
| Gamt          | chr10:80258150-80261012 | 0.7556  | 0.7753  | 0.0370  | 0.847140 |
| Gm15122       | chr10:80282443-80283006 | 5.5409  | 6.0418  | 0.1249  | 0.549116 |
| Pcsk4         | chr10:80321282-80329498 | 1.2787  | 1.0895  | -0.2311 | 0.391785 |
| Gm22721       | chr10:80382301-80382384 | 10.0864 | 7.7903  | -0.3727 | 0.473966 |
| Gm26710       | chr10:80578646-80580677 | 0.6683  | 0.5537  | -0.2715 | 0.411756 |
| Amh           | chr10:80805247-80807648 | 0.6750  | 0.7173  | 0.0877  | 0.750160 |
| Mir1982       | chr10:80828796-80828870 | 18.4158 | 17.7739 | -0.0512 | 0.809745 |
| Lsm7          | chr10:80852824-80855209 | 5.3982  | 4.5989  | -0.2312 | 0.321845 |
| Tmprss9       | chr10:80879719-80899441 | 0.6659  | 0.7513  | 0.1741  | 0.282145 |
| Snord37       | chr10:81178949-81179013 | 25.0026 | 21.5320 | -0.2156 | 0.665000 |
| 4930442H23Rik | chr10:81182604-81183849 | 2.2856  | 2.8981  | 0.3425  | 0.188484 |
| Atcayos       | chr10:81194608-81210877 | 0.3246  | 0.5463  | 0.7512  | 0.108256 |
| Mir3057       | chr10:81271596-81271687 | 18.3084 | 16.7719 | -0.1265 | 0.593962 |
| Gm16315       | chr10:81301700-81302917 | 1.2954  | 1.3159  | 0.0227  | 0.914547 |
| Smim24        | chr10:81393050-81395392 | 0.8833  | 1.2130  | 0.4576  | 0.286744 |
| Gm16104       | chr10:81409574-81411579 | 1.1240  | 1.6047  | 0.5136  | 0.250602 |
| Tile2         | chr10:81574560-81590845 | 0.1795  | 0.0730  | -1.2979 | 0.023008 |
| Zfp433        | chr10:81718918-81721468 | 1.9108  | 2.3936  | 0.3250  | 0.198611 |
| Gm4924        | chr10:82378592-82381237 | 0.9639  | 1.1314  | 0.2313  | 0.204863 |
| Ap3m1-ps      | chr10:82585405-82587534 | 0.3035  | 0.3034  | -0.0002 | 0.999655 |
| Gm4799        | chr10:82954343-82955000 | 2.6046  | 2.0685  | -0.3325 | 0.249269 |
| Chst11        | chr10:82985497-83195900 | 0.3227  | 0.6545  | 1.0200  | 0.161044 |
| Ckap4         | chr10:84526304-84534036 | 0.4122  | 0.3612  | -0.1905 | 0.502687 |
| Fhl4          | chr10:85097018-85102495 | 0.5832  | 0.4174  | -0.4827 | 0.250590 |
| A230060F14Rik | chr10:86021779-86022325 | 4.1248  | 3.6134  | -0.1910 | 0.185020 |
| Syn3          | chr10:86055124-86498896 | 0.0646  | 0.0772  | 0.2556  | 0.556190 |
| Gm25745       | chr10:86705315-86705448 | 12.0191 | 13.2283 | 0.1383  | 0.667971 |
| BC030307      | chr10:86705810-86776843 | 0.5499  | 0.4309  | -0.3516 | 0.182270 |
| Parpbb        | chr10:88091431-88146941 | 0.5063  | 0.6822  | 0.4303  | 0.340557 |
| Gm16235       | chr10:88444235-88449887 | 4.5729  | 4.2156  | -0.1174 | 0.643795 |
| Sycp3         | chr10:88459568-88473236 | 0.5843  | 0.5872  | 0.0070  | 0.991447 |
| Gm4925        | chr10:88729540-88731101 | 0.7594  | 0.9000  | 0.2450  | 0.467732 |
| Gas2l3        | chr10:89408822-89443967 | 0.2449  | 0.3735  | 0.6086  | 0.028979 |
| 1500026H17Rik | chr10:89686370-89700866 | 0.2294  | 0.1380  | -0.7336 | 0.040476 |
| NA            | chr10:89724749-89724875 | 7.4448  | 4.7023  | -0.6629 | 0.124972 |
| Ikkip         | chr10:91082939-91102607 | 0.4247  | 0.5749  | 0.4371  | 0.110400 |
| Cfap54        | chr10:92775618-93081618 | 0.0312  | 0.0398  | 0.3503  | 0.560696 |

|                      |                           |         |         |         |          |
|----------------------|---------------------------|---------|---------|---------|----------|
| <i>Mir1931</i>       | chr10:93162784-93162903   | 4.2964  | 3.2642  | -0.3964 | 0.476338 |
| <i>4933408J17Rik</i> | chr10:93589412-93605245   | 0.4979  | 0.6594  | 0.4052  | 0.427651 |
| <i>Socs2</i>         | chr10:95385361-95417180   | 0.1251  | 0.3196  | 1.3530  | 0.153248 |
| <i>Gm16239</i>       | chr10:99179183-99184610   | 0.3167  | 0.5640  | 0.8326  | 0.070213 |
| <i>Tmtc3</i>         | chr10:100443901-100487350 | 0.2883  | 0.2844  | -0.0197 | 0.937909 |
| <i>Tmtc2</i>         | chr10:105187662-105574451 | 0.1469  | 0.2526  | 0.7825  | 0.066113 |
| <i>E2f7</i>          | chr10:110745438-110787384 | 0.0793  | 0.0992  | 0.3226  | 0.393626 |
| <i>Csrp2</i>         | chr10:110920176-110939599 | 0.9776  | 0.9309  | -0.0706 | 0.825446 |
| <i>Phlda1</i>        | chr10:111506285-111508645 | 0.3872  | 0.4753  | 0.2956  | 0.516130 |
| <i>Kcnmb4os1</i>     | chr10:116418051-116421237 | 4.2911  | 4.3111  | 0.0067  | 0.983281 |
| <i>Slc35e3</i>       | chr10:117733678-117746358 | 0.9500  | 1.1069  | 0.2206  | 0.172177 |
| <i>lfng</i>          | chr10:118441046-118445892 | 1.4782  | 3.6141  | 1.2898  | 0.222056 |
| <i>Irak3</i>         | chr10:120141647-120202130 | 0.8813  | 0.9852  | 0.1608  | 0.652634 |
| <i>Gm16166</i>       | chr10:120928185-120928972 | 1.4509  | 2.2135  | 0.6094  | 0.120613 |
| <i>Mirlet7i</i>      | chr10:122985639-122985724 | 4.5743  | 4.1884  | -0.1272 | 0.857951 |
| <i>Avil</i>          | chr10:127000708-127020994 | 0.6421  | 0.6210  | -0.0481 | 0.796142 |
| <i>Gm20492</i>       | chr10:127288513-127289681 | 3.1914  | 4.8260  | 0.5966  | 0.171311 |
| <i>Gm4189</i>        | chr10:127289695-127290788 | 2.3178  | 1.9259  | -0.2673 | 0.498582 |
| <i>Stac3</i>         | chr10:127501685-127508823 | 0.6410  | 0.5367  | -0.2562 | 0.264289 |
| <i>Lrp1</i>          | chr10:127538160-127621148 | 0.0455  | 0.0854  | 0.9079  | 0.112515 |
| <i>Myo1a</i>         | chr10:127705169-127720887 | 0.1739  | 0.1424  | -0.2886 | 0.419292 |
| <i>Gpr182</i>        | chr10:127747275-127751732 | 0.4582  | 0.7017  | 0.6150  | 0.044206 |
| <i>Rdh1</i>          | chr10:127759720-127768297 | 0.0875  | 0.1952  | 1.1571  | 0.091451 |
| <i>Rdh9</i>          | chr10:127759786-127792697 | 0.1378  | 0.2124  | 0.6242  | 0.369399 |
| <i>Gm25206</i>       | chr10:128084142-128084216 | 18.8008 | 19.0530 | 0.0192  | 0.962880 |
| <i>Mir677</i>        | chr10:128085288-128085360 | 19.1527 | 18.9898 | -0.0123 | 0.937813 |
| <i>Gls2</i>          | chr10:128194456-128210004 | 0.5586  | 0.6142  | 0.1369  | 0.358083 |
| <i>Mip</i>           | chr10:128225837-128231812 | 0.4789  | 0.5081  | 0.0853  | 0.825222 |
| <i>Gm26847</i>       | chr10:128230589-128232790 | 1.4857  | 1.6393  | 0.1419  | 0.684985 |
| <i>Gm17201</i>       | chr10:128391841-128395563 | 3.8044  | 4.4925  | 0.2399  | 0.544895 |
| <i>Mmp19</i>         | chr10:128790952-128800824 | 0.6423  | 0.6090  | -0.0769 | 0.652618 |
| <i>Gm9770</i>        | chr10:130412498-130413312 | 1.6627  | 1.6994  | 0.0316  | 0.930294 |
| <i>Gm11948</i>       | chr11:3353572-3354911     | 2.7499  | 2.4736  | -0.1527 | 0.658098 |
| <i>Smtn</i>          | chr11:3517522-3540612     | 0.4643  | 0.7744  | 0.7380  | 0.111490 |
| <i>Gm11946</i>       | chr11:3530156-3536856     | 0.2020  | 0.3425  | 0.7620  | 0.156130 |
| <i>Slc35e4</i>       | chr11:3907020-3914664     | 0.3666  | 0.4836  | 0.3998  | 0.444828 |
| <i>Mtfp1</i>         | chr11:4091479-4095445     | 0.8567  | 0.6561  | -0.3850 | 0.247275 |
| <i>Sec14l2</i>       | chr11:4097038-4123415     | 0.5098  | 0.5274  | 0.0488  | 0.843782 |
| <i>Lif</i>           | chr11:4257556-4272514     | 0.2698  | 0.3603  | 0.4174  | 0.435410 |
| <i>Gm11960</i>       | chr11:4561779-4564637     | 0.4785  | 0.7959  | 0.7341  | 0.083271 |
| <i>AA413626</i>      | chr11:4918509-4919003     | 4.7014  | 5.7004  | 0.2780  | 0.212312 |
| <i>Aebp1</i>         | chr11:5861946-5872088     | 0.1582  | 0.1710  | 0.1118  | 0.618720 |
| <i>Gm11969</i>       | chr11:6182678-6183034     | 2.0335  | 2.4490  | 0.2683  | 0.346009 |
| <i>Gm11970</i>       | chr11:6446217-6446537     | 5.9430  | 5.0571  | -0.2329 | 0.335974 |
| <i>Gm22457</i>       | chr11:6528032-6528165     | 15.7848 | 16.7970 | 0.0897  | 0.784527 |
| <i>Snora5c</i>       | chr11:6620318-6620454     | 11.3771 | 11.4956 | 0.0149  | 0.963188 |
| <i>Adcy1</i>         | chr11:7063488-7178506     | 0.1318  | 0.0960  | -0.4567 | 0.304982 |
| <i>Gm11989</i>       | chr11:8383181-8383853     | 0.8909  | 0.6137  | -0.5377 | 0.312761 |
| <i>Vwc2</i>          | chr11:11114222-11268931   | 0.1710  | 0.2456  | 0.5226  | 0.201161 |
| <i>4930415F15Rik</i> | chr11:11462093-11515192   | 0.8274  | 0.9277  | 0.1651  | 0.609442 |
| <i>Gm11999</i>       | chr11:11642202-11685400   | 4.9277  | 4.0670  | -0.2770 | 0.103208 |
| <i>Flgnl1</i>        | chr11:11787430-11808962   | 0.7724  | 0.8758  | 0.1812  | 0.554021 |
| <i>Ddc</i>           | chr11:11814100-11898144   | 0.5133  | 0.4278  | -0.2629 | 0.487085 |
| <i>Akt2-ps</i>       | chr11:16514532-16515981   | 2.1691  | 1.9708  | -0.1383 | 0.455967 |
| <i>Fbxo48</i>        | chr11:16951374-16954772   | 0.5448  | 0.6692  | 0.2968  | 0.420859 |
| <i>Cnrip1</i>        | chr11:17051585-17079371   | 0.1430  | 0.2266  | 0.6640  | 0.153936 |
| <i>Etaa1os</i>       | chr11:17953969-17959578   | 1.3104  | 0.9953  | -0.3968 | 0.221310 |
| <i>Gm12036</i>       | chr11:20729419-20729949   | 7.0483  | 6.5556  | -0.1045 | 0.326956 |
| <i>Ehbp1</i>         | chr11:22005827-22342292   | 0.5840  | 0.6031  | 0.0466  | 0.819941 |
| <i>Gm20456</i>       | chr11:22839298-22842604   | 2.7428  | 2.4352  | -0.1716 | 0.423635 |
| <i>9130230N09Rik</i> | chr11:22858930-22861264   | 3.7658  | 3.9260  | 0.0601  | 0.855898 |
| <i>Fam161a</i>       | chr11:23007530-23030788   | 0.2114  | 0.2306  | 0.1254  | 0.594444 |
| <i>1700030C12Rik</i> | chr11:23497752-23499661   | 2.2031  | 1.8789  | -0.2297 | 0.161308 |
| <i>Gm12061</i>       | chr11:23894559-23895488   | 4.2278  | 4.5630  | 0.1101  | 0.630813 |
| <i>Bcl11a</i>        | chr11:24078055-24174123   | 0.0480  | 0.1328  | 1.4690  | 0.001188 |
| <i>Gm6899</i>        | chr11:26593240-26593862   | 2.3492  | 1.8817  | -0.3202 | 0.062350 |
| <i>Clhc1</i>         | chr11:29547949-29578367   | 0.8248  | 0.7465  | -0.1439 | 0.547987 |
| <i>Eml6</i>          | chr11:29743047-30026033   | 0.2676  | 0.2876  | 0.1041  | 0.654629 |
| <i>Acyp2</i>         | chr11:30505990-30649587   | 0.6211  | 0.5875  | -0.0803 | 0.898443 |
| <i>Gm12097</i>       | chr11:30572790-30574454   | 0.5097  | 0.6281  | 0.3014  | 0.327433 |
| <i>Gm12103</i>       | chr11:30822241-30822670   | 1.8272  | 2.1382  | 0.2268  | 0.269822 |

|                      |                         |         |         |         |          |
|----------------------|-------------------------|---------|---------|---------|----------|
| <i>Gm12102</i>       | chr11:31003294-31003898 | 2.6019  | 3.3524  | 0.3656  | 0.337170 |
| <i>Stc2</i>          | chr11:31357306-31370074 | 0.1706  | 0.4537  | 1.4110  | 0.170890 |
| <i>Gm12107</i>       | chr11:31832659-31838214 | 3.9279  | 3.6845  | -0.0923 | 0.454017 |
| <i>Rhbdf1</i>        | chr11:32209584-32222300 | 0.2153  | 0.1989  | -0.1149 | 0.588831 |
| <i>Ubtcd2</i>        | chr11:32455369-32516687 | 2.2712  | 2.2753  | 0.0026  | 0.988045 |
| <i>Efcab9</i>        | chr11:32522750-32532081 | 2.4774  | 1.9281  | -0.3616 | 0.209292 |
| <i>Anp32-ps</i>      | chr11:33394878-33395266 | 3.3432  | 4.2116  | 0.3331  | 0.138869 |
| <i>Kcnmb1</i>        | chr11:33963012-33973641 | 0.3268  | 0.5137  | 0.6527  | 0.198590 |
| <i>Gm12141</i>       | chr11:41498736-41500901 | 0.3917  | 0.5589  | 0.5130  | 0.175628 |
| <i>Ccnjl</i>         | chr11:43528783-43586997 | 0.2614  | 0.1745  | -0.5831 | 0.181207 |
| <i>Gm16034</i>       | chr11:46143896-46145014 | 6.3916  | 8.9788  | 0.4903  | 0.064078 |
| <i>Gm12568</i>       | chr11:46243570-46244194 | 1.3866  | 1.7315  | 0.3205  | 0.535503 |
| <i>Fam71b</i>        | chr11:46396558-46407982 | 0.4311  | 0.6955  | 0.6900  | 0.050288 |
| <i>Havcr2</i>        | chr11:46454934-46481255 | 0.4947  | 1.2527  | 1.3405  | 0.000848 |
| <i>Gm12176</i>       | chr11:47541431-47542306 | 1.4988  | 1.1796  | -0.3455 | 0.080880 |
| <i>Gm12178</i>       | chr11:48289983-48290313 | 5.1311  | 5.5875  | 0.1229  | 0.630730 |
| <i>Gm25296</i>       | chr11:48800865-48800932 | 30.4421 | 29.2694 | -0.0567 | 0.807090 |
| <i>Snord95</i>       | chr11:48803138-48803206 | 32.1823 | 35.9151 | 0.1583  | 0.408408 |
| <i>Trim7</i>         | chr11:48826139-48852209 | 0.0751  | 0.1958  | 1.3826  | 0.005291 |
| <i>Gm5431</i>        | chr11:48887421-48902152 | 0.4729  | 0.4236  | -0.1591 | 0.676096 |
| <i>Olfr56</i>        | chr11:48978888-49135387 | 1.5689  | 2.0085  | 0.3564  | 0.102052 |
| <i>Gm12188</i>       | chr11:49088233-49088543 | 5.9465  | 5.1396  | -0.2104 | 0.415955 |
| <i>Olfr1396</i>      | chr11:49112776-49114874 | 0.2991  | 0.4247  | 0.5057  | 0.512520 |
| <i>Gm12192</i>       | chr11:49697879-49698366 | 1.3092  | 1.9341  | 0.5630  | 0.099162 |
| <i>Gm12195</i>       | chr11:50134081-50135004 | 3.8850  | 4.9945  | 0.3624  | 0.124278 |
| <i>Gm26542</i>       | chr11:50237008-50288839 | 2.7758  | 3.0260  | 0.1245  | 0.691400 |
| <i>Zfp879</i>        | chr11:50832030-50841552 | 0.3582  | 0.3656  | 0.0294  | 0.940429 |
| <i>Grm6</i>          | chr11:50850684-50866208 | 0.2259  | 0.2594  | 0.1996  | 0.161829 |
| <i>Zfp2</i>          | chr11:50898711-50916165 | 0.5351  | 0.6750  | 0.3350  | 0.019119 |
| <i>D930048N14Rik</i> | chr11:51650953-51657681 | 0.6975  | 0.7056  | 0.0166  | 0.933494 |
| <i>O610009B22Rik</i> | chr11:51685385-51688874 | 2.5968  | 3.3406  | 0.3634  | 0.118488 |
| <i>Mir3061</i>       | chr11:52126745-52126836 | 5.0432  | 6.5593  | 0.3792  | 0.375444 |
| <i>Gm12207</i>       | chr11:52233723-52236619 | 5.9853  | 6.8736  | 0.1996  | 0.216609 |
| <i>Zcchc10</i>       | chr11:53324678-53333301 | 2.3480  | 3.3509  | 0.5131  | 0.002727 |
| <i>Leap2</i>         | chr11:53422180-53423170 | 3.5489  | 3.2329  | -0.1345 | 0.413649 |
| <i>Sept8</i>         | chr11:53519256-53549565 | 0.3434  | 0.3676  | 0.0980  | 0.762286 |
| <i>Il4</i>           | chr11:53602981-53618669 | 0.5961  | 0.8791  | 0.5605  | 0.411919 |
| <i>Gm22275</i>       | chr11:53701178-53701488 | 3.8473  | 4.8036  | 0.3203  | 0.359043 |
| <i>P4ha2</i>         | chr11:54100094-54131665 | 0.3648  | 0.3555  | -0.0374 | 0.876156 |
| <i>Gm26116</i>       | chr11:54658496-54658573 | 17.1627 | 17.0652 | -0.0082 | 0.984695 |
| <i>Gm12229</i>       | chr11:54746356-54746824 | 2.5561  | 2.8580  | 0.1611  | 0.621011 |
| <i>Gm12230</i>       | chr11:54947434-54947888 | 2.7824  | 4.3089  | 0.6310  | 0.098774 |
| <i>Slc36a3</i>       | chr11:55124814-55151708 | 0.4722  | 0.5394  | 0.1919  | 0.631272 |
| <i>Slc36a3os</i>     | chr11:55137043-55140193 | 2.3118  | 2.8469  | 0.3003  | 0.346012 |
| <i>Gm22884</i>       | chr11:55482693-55482833 | 12.2456 | 10.2195 | -0.2609 | 0.452855 |
| <i>Gm12238</i>       | chr11:55482705-55482829 | 12.9739 | 10.8477 | -0.2582 | 0.474271 |
| <i>4933424L21Rik</i> | chr11:57623697-57649494 | 1.5195  | 2.3603  | 0.6354  | 0.082388 |
| <i>4933426K07Rik</i> | chr11:57655414-57657826 | 2.0452  | 2.9801  | 0.5431  | 0.064693 |
| <i>2010001A14Rik</i> | chr11:57795498-57801417 | 3.3991  | 3.0505  | -0.1561 | 0.566951 |
| <i>Gm12248</i>       | chr11:58063827-58072937 | 1.1408  | 1.2821  | 0.1684  | 0.685568 |
| <i>Gm12246</i>       | chr11:58126067-58128512 | 3.1103  | 2.5974  | -0.2600 | 0.365080 |
| <i>Gm12254</i>       | chr11:58508790-58509261 | 7.7621  | 9.1636  | 0.2395  | 0.421036 |
| <i>Hist3h2bb-ps</i>  | chr11:58954047-58954512 | 7.1909  | 7.8800  | 0.1320  | 0.677186 |
| <i>Gm12263</i>       | chr11:59474283-59475765 | 0.3981  | 0.3502  | -0.1849 | 0.728309 |
| <i>Pemt</i>          | chr11:59970613-60046489 | 1.0650  | 0.8647  | -0.3005 | 0.346245 |
| <i>Gm12265</i>       | chr11:60240809-60241930 | 4.3428  | 4.9747  | 0.1960  | 0.436695 |
| <i>Gm12266</i>       | chr11:60343244-60344206 | 1.4742  | 1.6134  | 0.1302  | 0.805814 |
| <i>Lrrc48</i>        | chr11:60353328-60394341 | 0.3330  | 0.3846  | 0.2078  | 0.299791 |
| <i>Gm26534</i>       | chr11:60879117-60887218 | 1.2482  | 1.4279  | 0.1940  | 0.469773 |
| <i>Map2k3os</i>      | chr11:60920916-60931867 | 0.6817  | 0.6600  | -0.0467 | 0.934918 |
| <i>Mfap4</i>         | chr11:61485430-61488900 | 0.6076  | 0.5028  | -0.2733 | 0.542015 |
| <i>Epn2</i>          | chr11:61517248-61579687 | 0.1413  | 0.1357  | -0.0584 | 0.839370 |
| <i>Fam83g</i>        | chr11:61684090-61709951 | 0.1488  | 0.2263  | 0.6044  | 0.404570 |
| <i>Specc1</i>        | chr11:61956778-62223013 | 0.1023  | 0.1823  | 0.8327  | 0.006772 |
| <i>Zswim7</i>        | chr11:62267223-62281375 | 4.1870  | 3.7429  | -0.1617 | 0.278214 |
| <i>Gm12276</i>       | chr11:62331420-62331721 | 11.1448 | 15.3874 | 0.4654  | 0.045340 |
| <i>Cenpv</i>         | chr11:62524945-62539261 | 1.4872  | 1.4020  | -0.0852 | 0.699396 |
| <i>Snord49b</i>      | chr11:62603078-62603150 | 15.8869 | 14.9373 | -0.0889 | 0.384789 |
| <i>Snord49a</i>      | chr11:62603449-62603521 | 43.6278 | 44.8502 | 0.0399  | 0.880521 |
| <i>Snord65</i>       | chr11:62604514-62604586 | 13.9681 | 17.4704 | 0.3228  | 0.185919 |
| <i>Zfp286</i>        | chr11:62753376-62789462 | 0.6628  | 0.7305  | 0.1405  | 0.533449 |

|                      |                         |         |         |         |          |
|----------------------|-------------------------|---------|---------|---------|----------|
| <i>Trim16</i>        | chr11:62820230-62850808 | 0.3405  | 0.4365  | 0.3580  | 0.114669 |
| <i>9630013K17Rik</i> | chr11:63964225-63968040 | 2.0804  | 1.4166  | -0.5544 | 0.005599 |
| <i>Gm12289</i>       | chr11:64012614-64015224 | 0.8186  | 1.0261  | 0.3260  | 0.162700 |
| <i>Arhgap44</i>      | chr11:65002038-65162961 | 0.2324  | 0.1914  | -0.2802 | 0.530187 |
| <i>Dnah9</i>         | chr11:65831281-66168551 | 0.0791  | 0.1023  | 0.3714  | 0.384637 |
| <i>Myh3</i>          | chr11:67078299-67102291 | 0.0726  | 0.2535  | 1.8036  | 0.153709 |
| <i>C78197</i>        | chr11:68192192-68196153 | 0.4487  | 0.5427  | 0.2742  | 0.529235 |
| <i>Gm12305</i>       | chr11:68269557-68270879 | 1.9293  | 2.2134  | 0.1983  | 0.649132 |
| <i>Rangrf</i>        | chr11:68972483-68975185 | 1.7212  | 1.5119  | -0.1870 | 0.036045 |
| <i>Mir3062</i>       | chr11:68990573-68990678 | 9.0765  | 8.4353  | -0.1057 | 0.819246 |
| <i>Aurkb</i>         | chr11:69045646-69051664 | 1.1467  | 1.2644  | 0.1410  | 0.750636 |
| <i>Tmem107</i>       | chr11:69070805-69073293 | 0.3918  | 0.3996  | 0.0283  | 0.897785 |
| <i>Snord118</i>      | chr11:69073426-69073561 | 8.0682  | 6.0207  | -0.4223 | 0.366911 |
| <i>Alox8</i>         | chr11:69183931-69197843 | 0.3219  | 0.4945  | 0.6195  | 0.258296 |
| <i>Kcnab3</i>        | chr11:69326257-69333042 | 0.2407  | 0.4953  | 1.0411  | 0.048937 |
| <i>Efnb3</i>         | chr11:69554091-69560205 | 0.2709  | 0.2555  | -0.0843 | 0.810968 |
| <i>Sox15</i>         | chr11:69655313-69656727 | 1.1017  | 0.9274  | -0.2485 | 0.470704 |
| <i>Gm24029</i>       | chr11:69667833-69667976 | 24.3049 | 22.2911 | -0.1248 | 0.476204 |
| <i>Nlgn2</i>         | chr11:69823121-69837784 | 0.3211  | 0.3577  | 0.1559  | 0.707473 |
| <i>Tnk1</i>          | chr11:69851004-69858730 | 0.3020  | 0.4348  | 0.5257  | 0.171236 |
| <i>Kctd11</i>        | chr11:69878264-69880985 | 0.6254  | 0.7048  | 0.1725  | 0.467144 |
| <i>Slc16a11</i>      | chr11:70212751-70216417 | 0.7163  | 0.7926  | 0.1460  | 0.401347 |
| <i>Alox12</i>        | chr11:70241456-70255353 | 0.2692  | 0.2891  | 0.1030  | 0.700156 |
| <i>Cxcl16</i>        | chr11:70453982-70459984 | 1.0424  | 1.3752  | 0.3998  | 0.089824 |
| <i>Chrne</i>         | chr11:70614882-70619216 | 0.3361  | 0.5422  | 0.6897  | 0.064174 |
| <i>Gm12319</i>       | chr11:70654740-70656493 | 7.2947  | 6.9465  | -0.0706 | 0.762461 |
| <i>Gm19967</i>       | chr11:70864659-70872754 | 1.0120  | 1.2685  | 0.3258  | 0.055646 |
| <i>6330403K07Rik</i> | chr11:71031940-71033513 | 1.0545  | 1.4420  | 0.4515  | 0.530969 |
| <i>Fam64a</i>        | chr11:72042031-72047370 | 0.3817  | 0.4672  | 0.2916  | 0.503044 |
| <i>4930563E22Rik</i> | chr11:72215137-72218450 | 0.8890  | 0.8601  | -0.0478 | 0.757679 |
| <i>Fbxo39</i>        | chr11:72314443-72319416 | 0.4464  | 0.4122  | -0.1150 | 0.703589 |
| <i>Spns2</i>         | chr11:72451637-72489904 | 0.2372  | 0.4428  | 0.9003  | 0.042796 |
| <i>Spns3</i>         | chr11:72494918-72550506 | 0.1570  | 0.2471  | 0.6542  | 0.183567 |
| <i>Gm6733</i>        | chr11:72833460-72835380 | 0.7933  | 1.1545  | 0.5414  | 0.212440 |
| <i>P2rx5</i>         | chr11:73160420-73172685 | 0.4163  | 0.7312  | 0.8127  | 0.054822 |
| <i>Gm12333</i>       | chr11:75036475-75039348 | 0.8132  | 1.0922  | 0.4255  | 0.230283 |
| <i>Rps12-ps19</i>    | chr11:75070813-75071213 | 2.4615  | 2.3533  | -0.0649 | 0.715691 |
| <i>Hic1</i>          | chr11:75164564-75169519 | 0.4903  | 0.7840  | 0.6774  | 0.132165 |
| <i>Serpinf1</i>      | chr11:75409768-75422701 | 0.2109  | 0.4852  | 1.2020  | 0.238139 |
| <i>Mir22hg</i>       | chr11:75461538-75466676 | 0.8256  | 1.2327  | 0.5784  | 0.162959 |
| <i>Scarf1</i>        | chr11:75513539-75526582 | 0.7692  | 0.8547  | 0.1521  | 0.699163 |
| <i>NA</i>            | chr11:75696390-75696461 | 16.5583 | 14.4058 | -0.2009 | 0.586939 |
| <i>1700016K19Rik</i> | chr11:75999911-76003569 | 1.2667  | 1.2532  | -0.0154 | 0.926972 |
| <i>Gm12340</i>       | chr11:76144257-76144719 | 0.5798  | 0.3837  | -0.5956 | 0.657169 |
| <i>NA</i>            | chr11:77149627-77150525 | 0.6259  | 0.4287  | -0.5458 | 0.416978 |
| <i>Gm12734</i>       | chr11:77542132-77543080 | 3.3135  | 3.6135  | 0.1250  | 0.567688 |
| <i>Cryba1</i>        | chr11:77718614-77725283 | 0.9018  | 1.0445  | 0.2119  | 0.553882 |
| <i>Gm12571</i>       | chr11:78149195-78149438 | 1.9953  | 2.6872  | 0.4295  | 0.300814 |
| <i>Snord42a</i>      | chr11:78181298-78181363 | 15.4792 | 18.1774 | 0.2318  | 0.408335 |
| <i>Snord4a</i>       | chr11:78181685-78181756 | 10.2354 | 10.5243 | 0.0402  | 0.876368 |
| <i>Snord42b</i>      | chr11:78183055-78183124 | 18.2822 | 16.5631 | -0.1425 | 0.354739 |
| <i>Proca1</i>        | chr11:78193391-78205763 | 0.7229  | 0.6695  | -0.1107 | 0.853001 |
| <i>Gm11192</i>       | chr11:78278737-78279066 | 20.9073 | 27.5246 | 0.3967  | 0.111477 |
| <i>BC030499</i>      | chr11:78290840-78296805 | 0.8835  | 0.8340  | -0.0832 | 0.688543 |
| <i>Aldoc</i>         | chr11:78322967-78327781 | 0.9811  | 1.0204  | 0.0566  | 0.878231 |
| <i>Slc46a1</i>       | chr11:78465696-78472059 | 0.3418  | 0.2756  | -0.3104 | 0.452620 |
| <i>Sarm1</i>         | chr11:78472329-78497754 | 0.2467  | 0.2772  | 0.1685  | 0.632560 |
| <i>Sebox</i>         | chr11:78503448-78505081 | 0.8785  | 0.6169  | -0.5101 | 0.387399 |
| <i>Gm17235</i>       | chr11:78576236-78577350 | 2.3066  | 2.5935  | 0.1691  | 0.417561 |
| <i>Gm11201</i>       | chr11:79023596-79031057 | 3.4621  | 4.0292  | 0.2188  | 0.453693 |
| <i>Omg</i>           | chr11:79500981-79504084 | 0.1598  | 0.2505  | 0.6489  | 0.338290 |
| <i>Rab11fip4os1</i>  | chr11:79607078-79623163 | 0.7538  | 0.7992  | 0.0844  | 0.460891 |
| <i>Rhbdl3</i>        | chr11:80300911-80355955 | 0.3961  | 0.4340  | 0.1319  | 0.606968 |
| <i>C030013C21Rik</i> | chr11:80507409-80509106 | 0.6281  | 0.3646  | -0.7847 | 0.143320 |
| <i>Fndc8</i>         | chr11:82892123-82900801 | 0.8520  | 0.9116  | 0.0976  | 0.789501 |
| <i>Slfn4</i>         | chr11:83175185-83190221 | 0.4209  | 0.5718  | 0.4421  | 0.570175 |
| <i>AA465934</i>      | chr11:83291698-83294632 | 4.8082  | 5.7949  | 0.2693  | 0.335243 |
| <i>Snord7</i>        | chr11:83294303-83294400 | 5.3531  | 5.9121  | 0.1433  | 0.830832 |
| <i>1700020L24Rik</i> | chr11:83437685-83441232 | 1.0267  | 1.0823  | 0.0761  | 0.872835 |
| <i>Mmp28</i>         | chr11:83440767-83463071 | 0.2187  | 0.2410  | 0.1398  | 0.729159 |
| <i>Ccl6</i>          | chr11:83587881-83593087 | 0.4875  | 0.4548  | -0.1004 | 0.740116 |

|                      |                           |         |         |         |          |
|----------------------|---------------------------|---------|---------|---------|----------|
| <i>Ccl3</i>          | chr11:83647843-83649355   | 0.4862  | 1.6415  | 1.7555  | 0.231396 |
| <i>Dusp14</i>        | chr11:84048040-84069261   | 0.4850  | 0.6747  | 0.4764  | 0.519836 |
| <i>4930502E09Rik</i> | chr11:84829177-84830868   | 2.6629  | 2.3573  | -0.1759 | 0.502543 |
| <i>NA</i>            | chr11:85234774-85235223   | 6.5215  | 5.4918  | -0.2479 | 0.465585 |
| <i>Appbp2os</i>      | chr11:85235170-85238304   | 3.0491  | 3.4428  | 0.1752  | 0.592734 |
| <i>Bcas3os1</i>      | chr11:85702199-85719744   | 0.6364  | 0.8168  | 0.3600  | 0.418478 |
| <i>2610027K06Rik</i> | chr11:85791660-85832223   | 0.5762  | 0.5324  | -0.1140 | 0.539417 |
| <i>NA</i>            | chr11:86317265-86317487   | 5.8838  | 5.2896  | -0.1536 | 0.588772 |
| <i>Gm25427</i>       | chr11:86333205-86333308   | 8.4578  | 8.9985  | 0.0894  | 0.711068 |
| <i>Gm11491</i>       | chr11:87121566-87126958   | 3.2371  | 3.2427  | 0.0025  | 0.991572 |
| <i>Ppm1e</i>         | chr11:87226905-87359023   | 0.1485  | 0.2095  | 0.4962  | 0.147231 |
| <i>Rad51c</i>        | chr11:87376644-87404954   | 0.6489  | 0.6073  | -0.0956 | 0.560775 |
| <i>Tex14</i>         | chr11:87405064-87555823   | 0.2298  | 0.3946  | 0.7805  | 0.005210 |
| <i>Gm22068</i>       | chr11:87426715-87426879   | 15.6002 | 14.3854 | -0.1170 | 0.642007 |
| <i>NA</i>            | chr11:87443236-87443450   | 6.3152  | 6.0425  | -0.0637 | 0.866961 |
| <i>NA</i>            | chr11:87471367-87471581   | 3.4994  | 1.7634  | -0.9888 | 0.017241 |
| <i>Sept4</i>         | chr11:87568902-87590539   | 0.7981  | 0.7501  | -0.0893 | 0.703778 |
| <i>2010015M23Rik</i> | chr11:88039577-88047360   | 1.0938  | 0.8861  | -0.3039 | 0.348507 |
| <i>Gm15893</i>       | chr11:88356290-88363947   | 1.2185  | 1.9399  | 0.6709  | 0.010136 |
| <i>C030037D09Rik</i> | chr11:88718644-88728893   | 0.3963  | 0.4405  | 0.1525  | 0.603618 |
| <i>Akap1</i>         | chr11:88830791-88864586   | 0.8909  | 0.7669  | -0.2163 | 0.190610 |
| <i>Scpep1</i>        | chr11:88924019-88955465   | 1.4721  | 1.6400  | 0.1558  | 0.534488 |
| <i>Gm21885</i>       | chr11:94284651-94285985   | 8.2979  | 7.6039  | -0.1260 | 0.563430 |
| <i>Abcc3</i>         | chr11:94343294-94392997   | 0.2446  | 0.4828  | 0.9810  | 0.224543 |
| <i>Acsf2</i>         | chr11:94557101-94601871   | 1.1607  | 1.0319  | -0.1698 | 0.399050 |
| <i>Chad</i>          | chr11:94565046-94569127   | 0.4872  | 0.5659  | 0.2161  | 0.486962 |
| <i>Cdc34-ps</i>      | chr11:94741781-94743014   | 0.3276  | 0.1936  | -0.7591 | 0.366279 |
| <i>Pdk2</i>          | chr11:95026257-95041354   | 0.6979  | 0.8250  | 0.2414  | 0.413817 |
| <i>Itga3</i>         | chr11:95044473-95076801   | 0.3527  | 0.4215  | 0.2569  | 0.488480 |
| <i>Tac4</i>          | chr11:95261528-95269265   | 1.9061  | 2.1310  | 0.1609  | 0.475705 |
| <i>Gm11521</i>       | chr11:95336010-95337408   | 3.8152  | 4.8988  | 0.3607  | 0.057788 |
| <i>Gm26830</i>       | chr11:95669951-95672719   | 1.2628  | 1.0777  | -0.2287 | 0.583053 |
| <i>Polr2k-ps</i>     | chr11:95761490-95761665   | 8.1466  | 8.3975  | 0.0438  | 0.874281 |
| <i>4833417C18Rik</i> | chr11:95858864-95861044   | 1.1848  | 1.3863  | 0.2266  | 0.262117 |
| <i>Gm11539</i>       | chr11:96248632-96249189   | 1.7217  | 1.4766  | -0.2215 | 0.362122 |
| <i>Hoxb4</i>         | chr11:96316683-96321638   | 0.3427  | 0.5301  | 0.6293  | 0.008209 |
| <i>Gm11531</i>       | chr11:96392111-96392666   | 1.6980  | 1.8601  | 0.1316  | 0.725122 |
| <i>Gm11529</i>       | chr11:96448322-96464547   | 2.7473  | 3.2524  | 0.2435  | 0.196151 |
| <i>Gm11517</i>       | chr11:96795438-96795825   | 1.7799  | 1.9542  | 0.1349  | 0.783261 |
| <i>Prr15l</i>        | chr11:96928103-96937830   | 0.5119  | 0.5585  | 0.1257  | 0.620527 |
| <i>Gm11592</i>       | chr11:97280127-97282897   | 1.0831  | 0.7455  | -0.5389 | 0.152767 |
| <i>Gpr179</i>        | chr11:97332108-97352077   | 0.1409  | 0.1305  | -0.1111 | 0.813688 |
| <i>Pcgf2</i>         | chr11:97688822-97700497   | 0.3821  | 0.3934  | 0.0422  | 0.899070 |
| <i>1700001P01Rik</i> | chr11:97771480-97775918   | 1.7543  | 1.1985  | -0.5497 | 0.113429 |
| <i>Snora21</i>       | chr11:97781638-97781775   | 19.4411 | 19.0777 | -0.0272 | 0.824083 |
| <i>Fbxo47</i>        | chr11:97853825-97884154   | 0.8305  | 1.0617  | 0.3543  | 0.191799 |
| <i>Ptxdc1</i>        | chr11:97923237-97986444   | 0.2729  | 0.4413  | 0.6935  | 0.083096 |
| <i>Gm11633</i>       | chr11:97968791-97969235   | 1.3800  | 1.3314  | -0.0517 | 0.935992 |
| <i>Gm11604</i>       | chr11:98185365-98186107   | 1.7578  | 1.8143  | 0.0456  | 0.767023 |
| <i>Erbp2</i>         | chr11:98412469-98437716   | 0.0725  | 0.0790  | 0.1242  | 0.799739 |
| <i>Zpbb2</i>         | chr11:98551096-98558665   | 2.0591  | 1.9105  | -0.1081 | 0.510139 |
| <i>Gm12356</i>       | chr11:98682920-98683415   | 6.1795  | 5.8241  | -0.0854 | 0.786102 |
| <i>Nr1d1</i>         | chr11:98767931-98775333   | 0.7588  | 0.6574  | -0.2070 | 0.543533 |
| <i>Cdc6</i>          | chr11:98907800-98923940   | 0.4472  | 0.6204  | 0.4722  | 0.248974 |
| <i>Krt222</i>        | chr11:99232760-99244085   | 1.2162  | 1.0985  | -0.1468 | 0.311864 |
| <i>Krt10</i>         | chr11:99385253-99389364   | 0.8020  | 0.8497  | 0.0832  | 0.689888 |
| <i>Gm11560</i>       | chr11:99932161-99933109   | 0.7504  | 0.6818  | -0.1384 | 0.749228 |
| <i>Hap1</i>          | chr11:100347326-100356128 | 0.3022  | 0.5924  | 0.9711  | 0.016446 |
| <i>Gm10039</i>       | chr11:100361617-100362151 | 2.0209  | 2.0963  | 0.0529  | 0.878408 |
| <i>Fkbp10</i>        | chr11:100415696-100424824 | 0.2960  | 0.4354  | 0.5565  | 0.201281 |
| <i>Klhl10</i>        | chr11:100441916-100457022 | 0.6970  | 0.6926  | -0.0091 | 0.967430 |
| <i>Zfp385c</i>       | chr11:100627542-100692455 | 0.9480  | 1.0008  | 0.0781  | 0.440738 |
| <i>Dhx58os</i>       | chr11:100687416-100697520 | 1.6409  | 2.4943  | 0.6041  | 0.108760 |
| <i>Hspb9</i>         | chr11:100713849-100714575 | 1.9116  | 2.0538  | 0.1035  | 0.748022 |
| <i>Kcnn4</i>         | chr11:100740375-100759942 | 0.3021  | 0.3520  | 0.2205  | 0.664054 |
| <i>Atp6v0a1</i>      | chr11:101009451-101063719 | 0.3232  | 0.4223  | 0.3859  | 0.134223 |
| <i>Cntnap1</i>       | chr11:101170522-101190724 | 0.2522  | 0.3329  | 0.4008  | 0.243949 |
| <i>Ccr10</i>         | chr11:101172996-101175443 | 0.5758  | 0.4244  | -0.4401 | 0.376289 |
| <i>Ptges3l</i>       | chr11:101418811-101425333 | 1.3699  | 1.3357  | -0.0364 | 0.830632 |
| <i>Rnd2</i>          | chr11:101464998-101471853 | 0.2749  | 0.2990  | 0.1213  | 0.710612 |
| <i>Tmem106a</i>      | chr11:101582241-101591788 | 1.0974  | 1.3996  | 0.3509  | 0.104184 |

|                      |                           |         |         |         |          |
|----------------------|---------------------------|---------|---------|---------|----------|
| <i>Arl4d</i>         | chr11:101665540-101667832 | 0.8070  | 1.3992  | 0.7939  | 0.104590 |
| <i>Etv4</i>          | chr11:101769741-101785371 | 0.3199  | 0.3460  | 0.1133  | 0.783406 |
| <i>Mpp2</i>          | chr11:102057014-102088515 | 0.1584  | 0.3193  | 1.0119  | 0.082420 |
| <i>Itga2b</i>        | chr11:102453296-102470122 | 0.5329  | 0.6042  | 0.1812  | 0.319032 |
| <i>Kif18b</i>        | chr11:102905528-102925124 | 0.6750  | 0.9945  | 0.5591  | 0.301232 |
| <i>1700023F06Rik</i> | chr11:103198945-103208558 | 0.4103  | 0.3732  | -0.1366 | 0.783821 |
| <i>1700028N14Rik</i> | chr11:103264859-103267745 | 3.3113  | 3.5826  | 0.1136  | 0.466299 |
| <i>Arhgap27os2</i>   | chr11:103355700-103361092 | 0.6753  | 0.9955  | 0.5598  | 0.129251 |
| <i>C130046K22Rik</i> | chr11:103697723-103722832 | 2.4055  | 1.9854  | -0.2769 | 0.253265 |
| <i>Gm8738</i>        | chr11:103879914-103880243 | 2.3164  | 2.7696  | 0.2578  | 0.604672 |
| <i>Mapt</i>          | chr11:104231389-104332090 | 0.2686  | 0.3194  | 0.2499  | 0.515496 |
| <i>Gm11662</i>       | chr11:104679104-104680655 | 1.3444  | 1.4729  | 0.1317  | 0.763056 |
| <i>Tanc2</i>         | chr11:105589985-105929304 | 0.0603  | 0.1135  | 0.9118  | 0.010245 |
| <i>Kcnh6</i>         | chr11:106008123-106034549 | 0.9745  | 1.0776  | 0.1451  | 0.516375 |
| <i>Taco1os</i>       | chr11:106065076-106066305 | 1.2680  | 1.2749  | 0.0078  | 0.977315 |
| <i>Gm11672</i>       | chr11:106126335-106127351 | 3.5112  | 3.8340  | 0.1269  | 0.505782 |
| <i>Gm10840</i>       | chr11:106160849-106161158 | 9.7815  | 7.1693  | -0.4482 | 0.104936 |
| <i>Cd79b</i>         | chr11:106311340-106314762 | 0.7989  | 1.4801  | 0.8896  | 0.133253 |
| <i>Gm22711</i>       | chr11:106501242-106501377 | 8.0092  | 6.4244  | -0.3181 | 0.563315 |
| <i>1810010H24Rik</i> | chr11:107028117-107030443 | 1.4114  | 1.6318  | 0.2093  | 0.466510 |
| <i>Gm11719</i>       | chr11:107330707-107331058 | 7.0354  | 6.9387  | -0.0199 | 0.928968 |
| <i>Gm11713</i>       | chr11:107410389-107413549 | 1.3939  | 1.1064  | -0.3333 | 0.501039 |
| <i>Gm11714</i>       | chr11:107428275-107435686 | 3.9052  | 4.6425  | 0.2495  | 0.216672 |
| <i>Gm11722</i>       | chr11:107481915-107483107 | 1.6081  | 1.4238  | -0.1756 | 0.529509 |
| <i>A830035A12Rik</i> | chr11:107531756-107548373 | 0.6954  | 0.3463  | -1.0057 | 0.156287 |
| <i>Gm11655</i>       | chr11:108181849-108194126 | 2.3513  | 3.4808  | 0.5660  | 0.092872 |
| <i>ApoH</i>          | chr11:108343314-108414396 | 1.1513  | 1.6658  | 0.5330  | 0.239651 |
| <i>Rgs9</i>          | chr11:109225354-109298129 | 0.0987  | 0.2270  | 1.2012  | 0.230509 |
| <i>9930022D16Rik</i> | chr11:109413916-109420405 | 0.4072  | 0.3605  | -0.1755 | 0.489714 |
| <i>Gm15642</i>       | chr11:109437171-109438145 | 5.5508  | 3.6479  | -0.6056 | 0.032456 |
| <i>Wipi1</i>         | chr11:109573330-109611967 | 0.1327  | 0.1798  | 0.4386  | 0.326060 |
| <i>Abca5</i>         | chr11:110269368-110337716 | 0.0310  | 0.0467  | 0.5910  | 0.392620 |
| <i>Kcnj16</i>        | chr11:110968032-111027968 | 0.4001  | 0.4279  | 0.0971  | 0.811710 |
| <i>Gm11675</i>       | chr11:111276099-111276931 | 1.6964  | 1.3624  | -0.3163 | 0.513423 |
| <i>4732490B19Rik</i> | chr11:113203314-113209669 | 0.2154  | 0.1802  | -0.2575 | 0.703870 |
| <i>Gm11693</i>       | chr11:113678529-113679331 | 1.9487  | 2.3044  | 0.2419  | 0.554369 |
| <i>Cpsf4l</i>        | chr11:113698171-113710017 | 1.0798  | 1.1081  | 0.0373  | 0.881637 |
| <i>Ttyh2</i>         | chr11:114675430-114720977 | 0.3524  | 0.4191  | 0.2501  | 0.187164 |
| <i>Cd300a</i>        | chr11:114890040-114904654 | 0.2424  | 0.3986  | 0.7174  | 0.038803 |
| <i>Cd300f</i>        | chr11:115116213-115133992 | 0.1207  | 0.3061  | 1.3426  | 0.004513 |
| <i>Cdr2l</i>         | chr11:115381915-115396132 | 0.4126  | 0.2456  | -0.7485 | 0.079602 |
| <i>Gm25364</i>       | chr11:115601655-115601762 | 8.5875  | 8.6078  | 0.0034  | 0.987721 |
| <i>Caskin2</i>       | chr11:115799182-115813639 | 0.2844  | 0.4259  | 0.5824  | 0.254142 |
| <i>Myo15b</i>        | chr11:115861611-115892603 | 0.1121  | 0.1087  | -0.0444 | 0.897822 |
| <i>Smim5</i>         | chr11:115899965-115906269 | 1.0158  | 0.9741  | -0.0604 | 0.794891 |
| <i>Smim6</i>         | chr11:115912016-115913920 | 1.2773  | 1.2801  | 0.0031  | 0.992744 |
| <i>Sap30bpos</i>     | chr11:115946449-115952105 | 0.8495  | 1.1234  | 0.4033  | 0.270765 |
| <i>Itgb4</i>         | chr11:115974708-116008412 | 0.3051  | 0.3990  | 0.3871  | 0.267499 |
| <i>Trim47</i>        | chr11:116105751-116127210 | 1.3306  | 1.3224  | -0.0089 | 0.978496 |
| <i>Cdk3-ps</i>       | chr11:116216002-116220287 | 1.4662  | 1.1038  | -0.4096 | 0.083876 |
| <i>Evpl</i>          | chr11:116220558-116238077 | 0.1465  | 0.1662  | 0.1816  | 0.722776 |
| <i>Galr2</i>         | chr11:116280938-116283938 | 0.4579  | 0.4777  | 0.0609  | 0.875513 |
| <i>Rps11-ps2</i>     | chr11:116382749-116383205 | 1.1265  | 0.8957  | -0.3308 | 0.399668 |
| <i>Qrich2</i>        | chr11:116441324-116455237 | 0.4093  | 0.4778  | 0.2231  | 0.476977 |
| <i>Gm11739</i>       | chr11:116466318-116474274 | 4.1743  | 4.6459  | 0.1544  | 0.279320 |
| <i>Gm11738</i>       | chr11:118114854-118118279 | 0.3210  | 0.2952  | -0.1213 | 0.670234 |
| <i>Gm24060</i>       | chr11:118180940-118181035 | 23.0390 | 22.4829 | -0.0352 | 0.869630 |
| <i>BC100451</i>      | chr11:118332359-118342500 | 0.7063  | 1.1811  | 0.7418  | 0.009336 |
| <i>Gm11748</i>       | chr11:118476469-118479458 | 1.6375  | 1.8144  | 0.1480  | 0.471373 |
| <i>Ccdc40</i>        | chr11:119228571-119265236 | 0.2001  | 0.1392  | -0.5231 | 0.203009 |
| <i>Rptoros</i>       | chr11:119820811-119834365 | 0.9272  | 1.1155  | 0.2668  | 0.507615 |
| <i>Gm11767</i>       | chr11:119935802-119942698 | 3.5185  | 3.7459  | 0.0904  | 0.752132 |
| <i>2810410L24Rik</i> | chr11:120185399-120189852 | 0.3205  | 0.3652  | 0.1881  | 0.655279 |
| <i>Gm23419</i>       | chr11:120346735-120346819 | 38.0146 | 27.3107 | -0.4771 | 0.071089 |
| <i>Fscn2</i>         | chr11:120361533-120368168 | 0.7656  | 0.7660  | 0.0007  | 0.997000 |
| <i>Pde6g</i>         | chr11:120447604-120453500 | 0.3410  | 0.2886  | -0.2407 | 0.687749 |
| <i>Gm11788</i>       | chr11:120489405-120492394 | 1.5352  | 1.8201  | 0.2456  | 0.518951 |
| <i>NA</i>            | chr11:120627680-120628181 | 4.9892  | 5.2871  | 0.0837  | 0.778498 |
| <i>Pycr1</i>         | chr11:120635711-120643769 | 0.1595  | 0.2361  | 0.5663  | 0.188116 |
| <i>Dcxr</i>          | chr11:120725398-120727281 | 1.0374  | 1.8008  | 0.7956  | 0.260190 |
| <i>Ccdc57</i>        | chr11:120826528-120932872 | 0.1134  | 0.0991  | -0.1957 | 0.792361 |

|               |                           |         |         |         |          |
|---------------|---------------------------|---------|---------|---------|----------|
| Gm11793       | chr11:121106146-121107127 | 0.7140  | 0.6890  | -0.0515 | 0.877547 |
| Fn3k          | chr11:121434912-121450491 | 0.5201  | 0.5856  | 0.1710  | 0.490074 |
| Zfp750        | chr11:121510977-121519333 | 0.5808  | 0.8018  | 0.4651  | 0.000762 |
| Gm26520       | chr12:3343815-3357153     | 1.2254  | 1.1395  | -0.1048 | 0.856512 |
| Dtnbos        | chr12:3752542-3762146     | 0.4623  | 0.5814  | 0.3305  | 0.499721 |
| Dnmt3aos      | chr12:3859292-3862244     | 0.7288  | 0.7674  | 0.0744  | 0.773369 |
| Pomc          | chr12:3954950-3960618     | 0.9968  | 0.9176  | -0.1194 | 0.743128 |
| Gm17541       | chr12:4689401-4689926     | 1.6991  | 1.9269  | 0.1815  | 0.709187 |
| Fam228a       | chr12:4713816-4738383     | 0.7103  | 0.7181  | 0.0156  | 0.957661 |
| Fam228b       | chr12:4746215-4769267     | 0.3020  | 0.3002  | -0.0087 | 0.969068 |
| Mfsd2b        | chr12:4862439-4874359     | 0.5206  | 0.5965  | 0.1966  | 0.432513 |
| Wdr35         | chr12:8973891-9028847     | 0.2364  | 0.2382  | 0.0108  | 0.953609 |
| Gm22748       | chr12:17546145-17546281   | 3.7912  | 5.6354  | 0.5719  | 0.174333 |
| 3110053B16Rik | chr12:20874124-20921262   | 1.7352  | 1.5059  | -0.2045 | 0.034389 |
| Zfp125        | chr12:20899821-20900867   | 5.4989  | 7.3751  | 0.4235  | 0.208600 |
| Gm21989       | chr12:20990458-21200919   | 0.3345  | 0.3948  | 0.2390  | 0.617249 |
| Gm20535       | chr12:21252117-21255952   | 0.4105  | 0.4984  | 0.2800  | 0.522330 |
| Gm25821       | chr12:21287926-21288059   | 5.5140  | 6.0533  | 0.1346  | 0.519451 |
| Gm4419        | chr12:21417910-21419803   | 1.2287  | 1.3052  | 0.0871  | 0.701586 |
| Gm16372       | chr12:24493206-24493656   | 4.1937  | 2.9855  | -0.4903 | 0.155907 |
| Gm6969        | chr12:24638668-24639010   | 2.2056  | 2.9197  | 0.4046  | 0.391678 |
| Sh3yl1        | chr12:30911667-30960162   | 0.3035  | 0.2657  | -0.1919 | 0.610425 |
| Prkar2b       | chr12:31958475-32061296   | 1.0450  | 1.1220  | 0.1025  | 0.496185 |
| 4933406C10Rik | chr12:32919383-32953789   | 0.3381  | 0.3831  | 0.1801  | 0.562100 |
| Gm16267       | chr12:33111961-33138945   | 0.9479  | 1.2224  | 0.3669  | 0.474400 |
| Hdac9         | chr12:34371502-34528889   | 0.4971  | 0.3717  | -0.4193 | 0.352106 |
| Gm5434        | chr12:36090378-36091829   | 0.7189  | 1.0174  | 0.5011  | 0.378764 |
| Ispd          | chr12:36381518-36689444   | 0.2709  | 0.5353  | 0.9825  | 0.336200 |
| Gm17056       | chr12:40198655-40201105   | 0.5853  | 0.5672  | -0.0453 | 0.901544 |
| Gm17024       | chr12:40209486-40211073   | 4.5047  | 4.8367  | 0.1026  | 0.503613 |
| Immp2l        | chr12:41024089-41955588   | 0.7966  | 1.0603  | 0.4126  | 0.067422 |
| Coch          | chr12:51593340-51605773   | 0.9456  | 0.9316  | -0.0216 | 0.964835 |
| Nubpl         | chr12:52097736-52312744   | 0.7950  | 0.7848  | -0.0187 | 0.877786 |
| Gm22513       | chr12:54696781-54696945   | 16.7081 | 21.9800 | 0.3956  | 0.390601 |
| Gm27014       | chr12:54963063-54964200   | 2.1293  | 2.3565  | 0.1462  | 0.735349 |
| Gm20403       | chr12:54986157-54986529   | 2.2349  | 2.0598  | -0.1177 | 0.751077 |
| Srp54b        | chr12:55155103-55189213   | 0.8403  | 0.3949  | -1.0894 | 0.017618 |
| Gm22973       | chr12:59040334-59040525   | 3.2836  | 3.4981  | 0.0913  | 0.900655 |
| Gm24233       | chr12:59134071-59134193   | 6.4442  | 8.2648  | 0.3590  | 0.178606 |
| Gm527         | chr12:64917910-64924591   | 2.5279  | 2.7597  | 0.1266  | 0.437418 |
| Rps29         | chr12:69157721-69159186   | 4.8155  | 5.4675  | 0.1832  | 0.219952 |
| NA            | chr12:69361184-69361481   | 5.0271  | 3.5696  | -0.4940 | 0.187710 |
| Atp5s         | chr12:69724961-69744658   | 2.1594  | 2.7362  | 0.3416  | 0.054533 |
| 4931403G20Rik | chr12:69847634-69853671   | 0.5629  | 0.5630  | 0.0001  | 0.999730 |
| Atl1          | chr12:69893104-69964085   | 0.5607  | 0.5549  | -0.0150 | 0.923969 |
| Gm22058       | chr12:69930903-69931213   | 9.3015  | 7.9005  | -0.2355 | 0.436595 |
| Pygl          | chr12:70190810-70231488   | 0.2831  | 0.4305  | 0.6047  | 0.216581 |
| Tom20l        | chr12:71111427-71123222   | 1.2626  | 0.7983  | -0.6613 | 0.204722 |
| Ccdc175       | chr12:72101291-72185029   | 0.6036  | 0.6841  | 0.1807  | 0.511261 |
| Hspa2         | chr12:76404175-76406934   | 0.4315  | 0.9074  | 1.0724  | 0.041277 |
| Plekhg3       | chr12:76533559-76579039   | 0.3151  | 0.5195  | 0.7211  | 0.183158 |
| Sptb          | chr12:76580487-76710547   | 0.2251  | 0.3411  | 0.5999  | 0.256877 |
| Plek2         | chr12:78888690-78906964   | 1.1019  | 1.1987  | 0.1214  | 0.684330 |
| Arg2          | chr12:79130776-79156301   | 1.6525  | 2.4728  | 0.5815  | 0.108595 |
| Gm17194       | chr12:79168485-79168833   | 7.7134  | 7.9043  | 0.0353  | 0.689566 |
| Erh           | chr12:80634021-80644341   | 2.2823  | 2.3026  | 0.0128  | 0.919306 |
| Gm4787        | chr12:81376990-81379464   | 0.5484  | 0.6573  | 0.2612  | 0.501350 |
| Adam4         | chr12:81419442-81421946   | 0.7304  | 0.9906  | 0.4396  | 0.093674 |
| Gm24853       | chr12:81501239-81501360   | 24.4491 | 24.6157 | 0.0098  | 0.969913 |
| Gm17191       | chr12:81532034-81533358   | 2.2736  | 2.0757  | -0.1314 | 0.674967 |
| Gm16572       | chr12:81587798-81589640   | 2.6216  | 2.7116  | 0.0487  | 0.905881 |
| Papln         | chr12:83763633-83792382   | 0.1152  | 0.1248  | 0.1150  | 0.827612 |
| Dnal1         | chr12:84114365-84147498   | 0.1563  | 0.2141  | 0.4535  | 0.227626 |
| Pnma1         | chr12:84146130-84148489   | 0.6007  | 0.5982  | -0.0061 | 0.987704 |
| Gm5436        | chr12:84258331-84258973   | 1.7886  | 1.6680  | -0.1007 | 0.799220 |
| Fam161b       | chr12:84345308-84361833   | 0.6702  | 0.5427  | -0.3044 | 0.424967 |
| Gm17193       | chr12:84922541-84923512   | 2.1323  | 2.1822  | 0.0333  | 0.912974 |
| Prox2os       | chr12:85086373-85088228   | 1.7486  | 1.9335  | 0.1450  | 0.532473 |
| Rps6kl1       | chr12:85135595-85151264   | 1.0225  | 1.2147  | 0.2484  | 0.339234 |
| Zc2hc1c       | chr12:85288590-85299358   | 0.4416  | 0.6104  | 0.4670  | 0.062186 |
| Jdp2          | chr12:85599104-85639878   | 0.7073  | 0.9305  | 0.3957  | 0.372131 |



|                      |                           |          |          |          |          |
|----------------------|---------------------------|----------|----------|----------|----------|
| <i>Mfsd7c</i>        | chr12:85746538-85813585   | 0.3642   | 0.4983   | 0.4525   | 0.220428 |
| <i>Tgfb3</i>         | chr12:86056743-86079041   | 0.6561   | 1.1536   | 0.8142   | 0.089928 |
| <i>Gm26698</i>       | chr12:86891403-86892567   | 4.0069   | 3.6160   | -0.1481  | 0.385125 |
| <i>Gm26764</i>       | chr12:87332487-87335655   | 1.1727   | 1.2269   | 0.0653   | 0.822379 |
| <i>Mir3068</i>       | chr12:87437681-87437817   | 18.5531  | 19.4454  | 0.0678   | 0.688764 |
| <i>Ston2</i>         | chr12:91638541-91788387   | 0.1124   | 0.1879   | 0.7408   | 0.003808 |
| <i>Spata7</i>        | chr12:98628156-98669815   | 0.0968   | 0.1201   | 0.3106   | 0.689681 |
| <i>Ttc8</i>          | chr12:98920573-98983238   | 0.1835   | 0.2634   | 0.5218   | 0.368852 |
| <i>Gm20682</i>       | chr12:99292607-99296620   | 0.5575   | 0.6606   | 0.2446   | 0.547267 |
| <i>330002A11Rik</i>  | chr12:99341153-99361827   | 1.0865   | 1.0767   | -0.0130  | 0.975680 |
| <i>Efcab11</i>       | chr12:99717530-99883442   | 0.3555   | 0.5369   | 0.5949   | 0.233170 |
| <i>Mir1190</i>       | chr12:101021672-101021793 | 7.9612   | 13.0682  | 0.7150   | 0.142635 |
| <i>9330161L09Rik</i> | chr12:103406821-103407820 | 3.9461   | 3.6720   | -0.1039  | 0.656508 |
| <i>Serpina3f</i>     | chr12:104214543-104221129 | 0.3286   | 0.7223   | 1.1362   | 0.346377 |
| <i>D430019H16Rik</i> | chr12:105453855-105493095 | 0.2120   | 0.4056   | 0.9359   | 0.266606 |
| <i>Gm16086</i>       | chr12:107079359-107099673 | 5.2697   | 2.9294   | -0.8471  | 0.005829 |
| <i>Gm16085</i>       | chr12:107129680-107132576 | 4.0739   | 3.4600   | -0.2357  | 0.491687 |
| <i>Gm16084</i>       | chr12:107147163-107160207 | 2.6886   | 2.2907   | -0.2311  | 0.553311 |
| <i>Gm2800</i>        | chr12:107183554-107186734 | 3.7736   | 4.0888   | 0.1157   | 0.736004 |
| <i>Ccdc85c</i>       | chr12:108206344-108275417 | 0.5341   | 0.3300   | -0.6947  | 0.298236 |
| <i>Slc25a47</i>      | chr12:108851128-108856814 | 1.4098   | 1.2188   | -0.2100  | 0.575030 |
| <i>Rian</i>          | chr12:109603939-109661716 | 0.0285   | 0.0554   | 0.9592   | 0.262211 |
| <i>1700001K19Rik</i> | chr12:110667688-110682619 | 1.6995   | 1.6563   | -0.0372  | 0.908058 |
| <i>Mok</i>           | chr12:110807797-110840939 | 0.4993   | 0.6332   | 0.3428   | 0.395338 |
| <i>Mpc1-ps</i>       | chr12:110858069-110858942 | 1.0001   | 0.7279   | -0.4583  | 0.325687 |
| <i>Ankrd9</i>        | chr12:110975352-110979040 | 1.4362   | 1.0547   | -0.4454  | 0.105058 |
| <i>4930595D18Rik</i> | chr12:111159849-111184491 | 2.0632   | 2.1787   | 0.0786   | 0.673042 |
| <i>Cdc42bbp</i>      | chr12:111292971-111377718 | 0.1334   | 0.1894   | 0.5058   | 0.428132 |
| <i>Snora28</i>       | chr12:111540940-111541067 | 29.3377  | 31.2121  | 0.0893   | 0.648818 |
| <i>2810029C07Rik</i> | chr12:111572320-111574402 | 0.3339   | 0.2964   | -0.1718  | 0.587310 |
| <i>Gm15995</i>       | chr12:111726391-111727127 | 1.0637   | 1.4339   | 0.4309   | 0.259257 |
| <i>Gm15996</i>       | chr12:111730093-111731831 | 1.4889   | 1.9889   | 0.4177   | 0.278588 |
| <i>Pld4</i>          | chr12:112760654-112768986 | 1.1114   | 2.0226   | 0.8638   | 0.034994 |
| <i>Tex22</i>         | chr12:113074501-113088917 | 2.0048   | 1.7871   | -0.1659  | 0.255311 |
| <i>Crip2</i>         | chr12:113140235-113145504 | 1.3351   | 1.1137   | -0.2615  | 0.565292 |
| <i>Igha</i>          | chr12:113258767-113260236 | 1.6595   | 0.7334   | -1.1781  | 0.408211 |
| <i>Ighg2c</i>        | chr12:113285324-113288930 | 1.3577   | 1.7278   | 0.3477   | 0.776398 |
| <i>Ighg1</i>         | chr12:113328975-113330523 | 0.6619   | 0.7400   | 0.1609   | 0.917975 |
| <i>Adam6b</i>        | chr12:113489544-113492018 | 0.6617   | 0.4612   | -0.5206  | 0.244874 |
| <i>Ighv1-22</i>      | chr12:114746272-114746706 | 0.4650   | 0.0001   | -12.1831 | 0.355918 |
| <i>Wdr60</i>         | chr12:116207049-116263025 | 0.2715   | 0.2502   | -0.1179  | 0.820922 |
| <i>Rapgef5</i>       | chr12:117516478-117756978 | 0.2692   | 0.4484   | 0.7359   | 0.379899 |
| <i>Gm6768</i>        | chr12:119260933-119264272 | 0.3456   | 0.3660   | 0.0828   | 0.861995 |
| <i>Gm23084</i>       | chr13:3648536-3648650     | 5.1444   | 4.9591   | -0.0529  | 0.913389 |
| <i>Akr1c18</i>       | chr13:4132614-4150654     | 1.3531   | 0.8563   | -0.6600  | 0.212268 |
| <i>Idi1</i>          | chr13:8885500-8892451     | 0.8975   | 0.6990   | -0.3607  | 0.347240 |
| <i>Gm23553</i>       | chr13:9109304-9109599     | 2.7873   | 4.6173   | 0.7282   | 0.023215 |
| <i>Chrm3</i>         | chr13:9877228-9878998     | 0.8601   | 0.8098   | -0.0868  | 0.770964 |
| <i>Actn2</i>         | chr13:12269425-12340760   | 0.9179   | 0.8717   | -0.0745  | 0.764877 |
| <i>Edaradd</i>       | chr13:12471208-12520450   | 0.3673   | 0.2936   | -0.3232  | 0.162125 |
| <i>Gm18856</i>       | chr13:13964486-13965860   | 0.4812   | 0.6442   | 0.4209   | 0.296261 |
| <i>Tcrg-C1</i>       | chr13:19214102-19216618   | 1.0989   | 1.4710   | 0.4207   | 0.291594 |
| <i>Gpr141</i>        | chr13:19749681-19824257   | 0.1712   | 0.4664   | 1.4455   | 0.064204 |
| <i>Pgbd1</i>         | chr13:21421274-21441058   | 0.3118   | 0.2919   | -0.0951  | 0.760682 |
| <i>Hist1h2bl</i>     | chr13:21715762-21716143   | 7.6800   | 7.1839   | -0.0963  | 0.836899 |
| <i>NA</i>            | chr13:21717627-21718115   | 3.4410   | 3.8259   | 0.1530   | 0.552762 |
| <i>Hist1h2bn</i>     | chr13:21754122-21754503   | 3.0045   | 3.6972   | 0.2993   | 0.393667 |
| <i>NA</i>            | chr13:21782914-21783397   | 6.9947   | 7.3813   | 0.0776   | 0.775874 |
| <i>Hist1h2an</i>     | chr13:21786825-21787218   | 6.8286   | 8.4855   | 0.3134   | 0.518566 |
| <i>Prss16</i>        | chr13:22002175-22009742   | 1.0843   | 1.0766   | -0.0102  | 0.977964 |
| <i>Hist1h2ah</i>     | chr13:22035112-22035643   | 2.9421   | 2.1630   | -0.4438  | 0.391603 |
| <i>Hist1h2ag</i>     | chr13:22042478-22042949   | 2.5647   | 2.5275   | -0.0211  | 0.963486 |
| <i>4930586N03Rik</i> | chr13:23313524-23385799   | 2.2767   | 2.8064   | 0.3017   | 0.187574 |
| <i>Hist1h2af</i>     | chr13:23533905-23534304   | 4.7225   | 5.7507   | 0.2842   | 0.426311 |
| <i>Hist1h2bf</i>     | chr13:23573735-23574196   | 6.9677   | 6.2578   | -0.1550  | 0.665839 |
| <i>Hist1h2ad</i>     | chr13:23574380-23574952   | 1.5482   | 2.2135   | 0.5158   | 0.046718 |
| <i>Hist1h4d</i>      | chr13:23581597-23581990   | 312.4235 | 291.9847 | -0.0976  | 0.664223 |
| <i>Gm11398</i>       | chr13:23620729-23621049   | 3.6552   | 3.9991   | 0.1298   | 0.736460 |
| <i>Hfe</i>           | chr13:23702033-23710854   | 0.2910   | 0.5433   | 0.9004   | 0.159548 |
| <i>Hist1h3c</i>      | chr13:23744972-23745602   | 4.3066   | 5.7213   | 0.4098   | 0.196905 |
| <i>Hist1h2ab</i>     | chr13:23751087-23751593   | 6.3572   | 8.7431   | 0.4598   | 0.194143 |

|               |                         |         |         |         |          |
|---------------|-------------------------|---------|---------|---------|----------|
| 4930558J22Rik | chr13:23756202-23757620 | 0.7227  | 0.8761  | 0.2776  | 0.459540 |
| Hist1h4a      | chr13:23760801-23761249 | 5.4169  | 8.7882  | 0.6981  | 0.062571 |
| Lrrc16a       | chr13:24012343-24280795 | 0.0464  | 0.1519  | 1.7110  | 0.023130 |
| Gm11342       | chr13:24336269-24337343 | 0.5041  | 0.9641  | 0.9354  | 0.152498 |
| Gm11345       | chr13:24366775-24375950 | 1.0040  | 1.2257  | 0.2878  | 0.380776 |
| Aldh5a1       | chr13:24907578-24937661 | 0.3572  | 0.4667  | 0.3859  | 0.238046 |
| Gm11361       | chr13:28257635-28258094 | 6.2186  | 6.8976  | 0.1495  | 0.486087 |
| 2610307P16Rik | chr13:28460033-28885620 | 0.4910  | 0.5909  | 0.2671  | 0.493457 |
| Gm11366       | chr13:30181715-30182144 | 2.2803  | 1.9588  | -0.2193 | 0.578673 |
| Dusp22        | chr13:30659988-30711231 | 2.2496  | 1.9359  | -0.2167 | 0.039485 |
| Hus1b         | chr13:30946572-30947759 | 0.7846  | 0.7253  | -0.1135 | 0.681991 |
| 1110046J04Rik | chr13:33935566-33960181 | 0.2689  | 0.4453  | 0.7277  | 0.070185 |
| Slc22a23      | chr13:34179157-34345182 | 0.6599  | 0.5818  | -0.1817 | 0.422012 |
| F13a1         | chr13:36867177-37050244 | 0.4678  | 0.4355  | -0.1031 | 0.662864 |
| Cage1         | chr13:38006051-38037069 | 0.7745  | 0.9199  | 0.2482  | 0.136929 |
| 5033403F01Rik | chr13:38960618-38966299 | 0.6435  | 0.7567  | 0.2337  | 0.501996 |
| Gcnt2         | chr13:40859767-40960891 | 0.1488  | 0.2181  | 0.5517  | 0.122194 |
| A730081D07Rik | chr13:40956413-41001151 | 0.6400  | 0.7280  | 0.1858  | 0.486098 |
| Gm26877       | chr13:41359970-41370908 | 3.6080  | 4.3189  | 0.2595  | 0.442270 |
| Tbc1d7        | chr13:43151743-43171501 | 2.8017  | 2.7885  | -0.0068 | 0.975782 |
| Gm26064       | chr13:43425741-43425850 | 12.0940 | 13.7187 | 0.1819  | 0.555728 |
| Cap2          | chr13:46501847-46649642 | 0.8662  | 0.9786  | 0.1760  | 0.470310 |
| Nhlrc1        | chr13:47012557-47014850 | 1.0668  | 0.9113  | -0.2273 | 0.524696 |
| Tpmt          | chr13:47025169-47044737 | 0.8201  | 1.0640  | 0.3757  | 0.164647 |
| A830005F24Rik | chr13:48513569-48514859 | 1.5939  | 1.7399  | 0.1265  | 0.730043 |
| Mirlet7d      | chr13:48536011-48536114 | 14.4395 | 14.3365 | -0.0103 | 0.967020 |
| Gm24111       | chr13:48537824-48537921 | 29.9890 | 24.6112 | -0.2851 | 0.181737 |
| Ptpdc1        | chr13:48577872-48625573 | 0.5297  | 0.6686  | 0.3360  | 0.302147 |
| Phf2os1       | chr13:48871111-48875460 | 6.4920  | 7.7547  | 0.2564  | 0.299378 |
| Cenpp         | chr13:49464026-49652746 | 1.8907  | 2.7773  | 0.5547  | 0.021087 |
| Tes3-ps       | chr13:49493614-49494819 | 1.8944  | 2.3550  | 0.3140  | 0.387911 |
| Ecm2          | chr13:49504809-49532789 | 0.1089  | 0.1025  | -0.0867 | 0.888733 |
| Gadd45g       | chr13:51846677-51848468 | 1.9904  | 2.9818  | 0.5831  | 0.204415 |
| Syk           | chr13:52583172-52648792 | 0.3012  | 0.4606  | 0.6129  | 0.139371 |
| Gm16578       | chr13:54219452-54223023 | 0.7714  | 0.7832  | 0.0218  | 0.941109 |
| Hk3           | chr13:55005984-55021385 | 0.4869  | 0.4410  | -0.1430 | 0.714361 |
| Gm17617       | chr13:55132961-55133548 | 45.3351 | 58.9624 | 0.3792  | 0.066575 |
| F12           | chr13:55417957-55426793 | 0.2729  | 0.1866  | -0.5483 | 0.178301 |
| Dbn1          | chr13:55473428-55488111 | 0.1029  | 0.1536  | 0.5783  | 0.373995 |
| Pdlim7        | chr13:55495794-55513676 | 0.7691  | 0.7717  | 0.0049  | 0.984689 |
| Dok3          | chr13:55523234-55528538 | 1.2881  | 1.0470  | -0.2990 | 0.274531 |
| 4930451E10Rik | chr13:55775135-55784505 | 1.3742  | 1.4356  | 0.0630  | 0.856822 |
| Tifab         | chr13:56173702-56178885 | 0.2605  | 0.5592  | 1.1022  | 0.061869 |
| Tgfb1         | chr13:56609602-56639339 | 0.4793  | 0.9096  | 0.9243  | 0.025200 |
| Mir7-1        | chr13:58392778-58392886 | 11.4849 | 13.1237 | 0.1924  | 0.391382 |
| 4930486L24Rik | chr13:60842620-60864416 | 2.1969  | 2.0437  | -0.1042 | 0.708626 |
| Ctla2b        | chr13:60895350-60897447 | 0.9249  | 1.1300  | 0.2890  | 0.617579 |
| Gm20563       | chr13:62006665-62006941 | 1.8989  | 2.6853  | 0.4999  | 0.346811 |
| Zfp808        | chr13:62129915-62173419 | 1.0215  | 1.2734  | 0.3179  | 0.289779 |
| Gm3604        | chr13:62368862-62371936 | 2.2447  | 1.8268  | -0.2972 | 0.304976 |
| Gm5665        | chr13:62699405-62726689 | 0.5150  | 0.6757  | 0.3917  | 0.309080 |
| Mir27b        | chr13:63300699-63300796 | 21.5819 | 21.3040 | -0.0187 | 0.934206 |
| Mir3074-1     | chr13:63301179-63301296 | 12.8605 | 11.2527 | -0.1927 | 0.571741 |
| Gm10767       | chr13:66904913-66909236 | 1.4680  | 1.5457  | 0.0745  | 0.690066 |
| Rscan18       | chr13:67096612-67114028 | 1.1792  | 0.9262  | -0.3484 | 0.105834 |
| 9430065F17Rik | chr13:67553233-67564009 | 0.6886  | 0.7678  | 0.1571  | 0.698385 |
| Gm26587       | chr13:67660456-67661445 | 3.5593  | 3.5965  | 0.0150  | 0.914072 |
| Zfp85os       | chr13:67729261-67756838 | 0.7745  | 0.7219  | -0.1014 | 0.428739 |
| 4930525G20Rik | chr13:67796593-67830985 | 0.8452  | 0.9752  | 0.2064  | 0.430509 |
| Srd5a1        | chr13:69573448-69611442 | 0.2595  | 0.3962  | 0.6104  | 0.075664 |
| Slc6a19       | chr13:73679744-73704865 | 0.1949  | 0.2038  | 0.0644  | 0.912986 |
| Trip13        | chr13:73912461-73937767 | 0.6138  | 0.7092  | 0.2084  | 0.516486 |
| Tppp          | chr13:74009406-74035753 | 0.6662  | 0.8299  | 0.3170  | 0.176922 |
| Gm16125       | chr13:74340538-74340877 | 7.6231  | 7.4652  | -0.0302 | 0.841589 |
| Zfp72         | chr13:74371425-74376566 | 2.2286  | 2.4477  | 0.1353  | 0.165641 |
| Eil2          | chr13:75707483-75772356 | 0.5404  | 0.7690  | 0.5089  | 0.258807 |
| Mctp1         | chr13:76384534-77031810 | 0.1289  | 0.2975  | 1.2064  | 0.005314 |
| 2210408I21Rik | chr13:77135539-77613291 | 0.3336  | 0.3509  | 0.0731  | 0.817622 |
| Mef2c         | chr13:83504033-83667079 | 0.1044  | 0.2591  | 1.3107  | 0.092871 |
| A230107N01Rik | chr13:84219580-84222175 | 0.2841  | 0.2690  | -0.0789 | 0.855414 |
| Gm4117        | chr13:89739459-89887166 | 0.0208  | 0.0339  | 0.7052  | 0.092966 |

|                      |                           |         |         |         |          |
|----------------------|---------------------------|---------|---------|---------|----------|
| <i>Rps23</i>         | chr13:90923130-90924942   | 4.6845  | 5.4220  | 0.2109  | 0.327530 |
| <i>A830009L08Rik</i> | chr13:91368987-91388085   | 0.3116  | 0.4018  | 0.3667  | 0.464523 |
| <i>Fam151b</i>       | chr13:92449621-92484031   | 2.1718  | 2.0210  | -0.1038 | 0.394334 |
| <i>Gm26527</i>       | chr13:93940989-93943015   | 1.2448  | 1.5606  | 0.3261  | 0.337149 |
| <i>Scamp1</i>        | chr13:94201309-94285857   | 0.2160  | 0.3011  | 0.4795  | 0.335852 |
| <i>Gm9776</i>        | chr13:94355838-94358818   | 0.3026  | 0.4679  | 0.6291  | 0.134154 |
| <i>Pde8b</i>         | chr13:95024453-95250336   | 0.4463  | 0.5869  | 0.3951  | 0.107013 |
| <i>Zbed3</i>         | chr13:95325236-95337841   | 0.3126  | 0.2143  | -0.5446 | 0.422404 |
| <i>Gm27031</i>       | chr13:95954593-95957171   | 0.5232  | 0.4405  | -0.2482 | 0.542654 |
| <i>Ankdd1b</i>       | chr13:96416133-96471198   | 0.8688  | 0.8711  | 0.0038  | 0.971511 |
| <i>Serf1</i>         | chr13:100107996-100114571 | 1.0669  | 0.7560  | -0.4969 | 0.375840 |
| <i>Naip5</i>         | chr13:100211738-100246323 | 0.2097  | 0.4779  | 1.1880  | 0.087913 |
| <i>Naip6</i>         | chr13:100281120-100317674 | 0.1759  | 0.2544  | 0.5322  | 0.357902 |
| <i>Mrps36</i>        | chr13:100735954-100744659 | 1.4811  | 1.3335  | -0.1515 | 0.635284 |
| <i>Cenph</i>         | chr13:100759673-100775899 | 0.6139  | 0.8435  | 0.4583  | 0.314574 |
| <i>Ccnb1</i>         | chr13:100778649-100786570 | 0.4193  | 0.5718  | 0.4476  | 0.130435 |
| <i>Cd180</i>         | chr13:102693557-102739629 | 0.1704  | 0.1835  | 0.1064  | 0.726763 |
| <i>Sgtb</i>          | chr13:104109740-104141735 | 0.7661  | 0.8529  | 0.1548  | 0.317886 |
| <i>Cenpk</i>         | chr13:104228954-104249615 | 0.4995  | 0.6997  | 0.4862  | 0.031779 |
| <i>2610204G07Rik</i> | chr13:104684930-104694994 | 0.7423  | 1.4397  | 0.9557  | 0.186857 |
| <i>Gm2822</i>        | chr13:108313098-108316273 | 0.7704  | 0.5834  | -0.4013 | 0.028619 |
| <i>Depdc1b</i>       | chr13:108316331-108407782 | 0.7686  | 0.7544  | -0.0269 | 0.939740 |
| <i>Plk2</i>          | chr13:110395043-110400844 | 0.2649  | 0.3479  | 0.3934  | 0.338045 |
| <i>Gm15327</i>       | chr13:111809140-111811039 | 0.8865  | 0.5968  | -0.5707 | 0.303329 |
| <i>Gm15326</i>       | chr13:111867935-111874730 | 1.5880  | 2.1487  | 0.4363  | 0.203349 |
| <i>Ankrd55</i>       | chr13:112288450-112384002 | 0.4006  | 0.4129  | 0.0437  | 0.914259 |
| <i>Gm26943</i>       | chr13:112884225-112885182 | 1.4265  | 1.6297  | 0.1922  | 0.542759 |
| <i>Gzma</i>          | chr13:113093824-113100979 | 3.0160  | 3.7494  | 0.3140  | 0.663470 |
| <i>3110070M22Rik</i> | chr13:119487260-119488383 | 0.8505  | 0.8127  | -0.0656 | 0.876314 |
| <i>Gm7120</i>        | chr13:119487940-119610458 | 0.4857  | 0.4569  | -0.0882 | 0.755920 |
| <i>Gm20900</i>       | chr13:120304193-120304655 | 3.4831  | 3.1862  | -0.1285 | 0.687301 |
| <i>Gm17590</i>       | chr5:3473070-3473178      | 11.1461 | 13.8235 | 0.3106  | 0.342952 |
| <i>Lrrd1</i>         | chr5:3845172-3866596      | 0.3830  | 0.3036  | -0.3355 | 0.335266 |
| <i>Mterf1b</i>       | chr5:4192366-4197651      | 2.6797  | 2.7177  | 0.0203  | 0.841399 |
| <i>Cdk14</i>         | chr5:4803390-5420312      | 0.0423  | 0.1010  | 1.2547  | 0.005679 |
| <i>Cldn12</i>        | chr5:5505014-5514958      | 0.4698  | 0.7121  | 0.6001  | 0.165323 |
| <i>NA</i>            | chr5:5781529-5783607      | 0.9249  | 0.8292  | -0.1575 | 0.639533 |
| <i>Gm26825</i>       | chr5:5781529-5783636      | 0.9486  | 0.8505  | -0.1575 | 0.639533 |
| <i>Gm5106</i>        | chr5:8773576-8798523      | 0.4552  | 0.7376  | 0.6962  | 0.419602 |
| <i>Gm15610</i>       | chr5:8971947-8972142      | 4.0292  | 2.7006  | -0.5772 | 0.053410 |
| <i>Magi2</i>         | chr5:19227045-20704798    | 0.3424  | 0.5556  | 0.6985  | 0.055908 |
| <i>Gm15421</i>       | chr5:22528320-22528719    | 1.3368  | 1.6787  | 0.3286  | 0.075490 |
| <i>Rpl17-ps5</i>     | chr5:22612590-22613217    | 2.7672  | 2.4634  | -0.1678 | 0.544290 |
| <i>4933427G23Rik</i> | chr5:23815617-23831897    | 0.9354  | 1.1242  | 0.2652  | 0.104250 |
| <i>Atg9b</i>         | chr5:24384180-24392143    | 0.5166  | 0.5037  | -0.0364 | 0.890906 |
| <i>Asic3</i>         | chr5:24413450-24417834    | 1.8522  | 1.6082  | -0.2038 | 0.324342 |
| <i>Gbx1</i>          | chr5:24502756-24527276    | 0.2331  | 0.4357  | 0.9023  | 0.042950 |
| <i>Mir671</i>        | chr5:24592113-24592211    | 9.3209  | 9.3900  | 0.0106  | 0.980037 |
| <i>Crygn</i>         | chr5:24751002-24758008    | 1.6177  | 2.0027  | 0.3080  | 0.333344 |
| <i>Gm25363</i>       | chr5:24820592-24820837    | 4.3562  | 3.9592  | -0.1378 | 0.721039 |
| <i>Prkag2os1</i>     | chr5:24902568-24906850    | 1.1863  | 1.2070  | 0.0250  | 0.910525 |
| <i>E130116L18Rik</i> | chr5:25222847-25223153    | 3.2080  | 2.9137  | -0.1388 | 0.630809 |
| <i>Hspe1-ps3</i>     | chr5:25391607-25391884    | 3.5132  | 4.0692  | 0.2120  | 0.577193 |
| <i>4831440E17Rik</i> | chr5:25499066-25501541    | 3.0865  | 3.1900  | 0.0476  | 0.798571 |
| <i>Cct8l1</i>        | chr5:25516066-25518021    | 0.1838  | 0.2749  | 0.5812  | 0.321761 |
| <i>Lmbr1</i>         | chr5:29229813-29378390    | 0.6656  | 0.8230  | 0.3062  | 0.381918 |
| <i>Gm5129</i>        | chr5:29735636-29735936    | 2.1778  | 2.0118  | -0.1144 | 0.680655 |
| <i>Gareml</i>        | chr5:30105160-30118378    | 0.1638  | 0.1581  | -0.0512 | 0.895525 |
| <i>Gm16288</i>       | chr5:30240081-30240448    | 2.3846  | 2.5690  | 0.1075  | 0.747284 |
| <i>Mapre3</i>        | chr5:30814640-30866106    | 0.5200  | 0.7046  | 0.4384  | 0.272726 |
| <i>Gm9970</i>        | chr5:31240674-31241232    | 4.6975  | 3.5255  | -0.4141 | 0.125137 |
| <i>4930566F21Rik</i> | chr5:31486628-31495179    | 1.3051  | 1.1628  | -0.1666 | 0.640122 |
| <i>Gm17130</i>       | chr5:32005976-32010863    | 1.1263  | 1.6033  | 0.5094  | 0.021730 |
| <i>Gm15613</i>       | chr5:32479559-32479885    | 8.0637  | 8.4594  | 0.0691  | 0.733851 |
| <i>Yes1</i>          | chr5:32611170-32687066    | 0.1470  | 0.1314  | -0.1618 | 0.712224 |
| <i>Gm2420</i>        | chr5:32724351-32736194    | 2.1144  | 2.1419  | 0.0186  | 0.937781 |
| <i>Gm9903</i>        | chr5:33629924-33632092    | 1.1534  | 1.5222  | 0.4003  | 0.041523 |
| <i>Fgfr3</i>         | chr5:33721723-33737068    | 0.0940  | 0.1107  | 0.2369  | 0.680778 |
| <i>Gm10059</i>       | chr5:33759365-33759536    | 5.1177  | 6.4211  | 0.3273  | 0.128649 |
| <i>Poln</i>          | chr5:34007197-34169448    | 0.4876  | 0.5424  | 0.1539  | 0.387833 |
| <i>Zfyve28</i>       | chr5:34194873-34288449    | 0.4076  | 0.7142  | 0.8093  | 0.022000 |

|               |                          |         |         |         |          |
|---------------|--------------------------|---------|---------|---------|----------|
| Gm15513       | chr5:34211809-34213802   | 0.3316  | 0.4469  | 0.4303  | 0.419610 |
| Gm26931       | chr5:34481913-34482522   | 3.3953  | 3.3871  | -0.0035 | 0.991094 |
| Msantd1       | chr5:34915914-34923839   | 0.6193  | 0.7163  | 0.2099  | 0.366968 |
| Sh3tc1        | chr5:35697179-35729276   | 0.3547  | 0.3603  | 0.0226  | 0.913908 |
| Ablim2        | chr5:35757879-35884973   | 0.4123  | 0.3771  | -0.1286 | 0.458231 |
| Wfs1          | chr5:36966103-36988982   | 1.2236  | 0.9473  | -0.3693 | 0.059370 |
| Gm1043        | chr5:37185896-37193023   | 0.7572  | 0.6319  | -0.2609 | 0.384897 |
| Crmp1         | chr5:37242079-37292132   | 0.9475  | 1.3469  | 0.5073  | 0.264772 |
| Nsg1          | chr5:38137192-38159467   | 0.6774  | 0.8697  | 0.3604  | 0.392102 |
| Zfp518b       | chr5:38668483-38684826   | 0.3649  | 0.5346  | 0.5511  | 0.190973 |
| Cc2d2a        | chr5:43662378-43740972   | 0.1441  | 0.2894  | 1.0062  | 0.041143 |
| Cd38          | chr5:43868808-43912375   | 0.6547  | 1.1372  | 0.7965  | 0.280003 |
| Fam184b       | chr5:45529705-45639501   | 0.3002  | 0.2874  | -0.0630 | 0.901861 |
| Kcnp4         | chr5:48389501-49524904   | 0.3708  | 0.4958  | 0.4192  | 0.143245 |
| 5730480H06Rik | chr5:48395572-48414294   | 1.0855  | 1.1453  | 0.0773  | 0.692581 |
| Gpr125        | chr5:49959950-50058996   | 0.3279  | 0.2908  | -0.1731 | 0.602059 |
| 9230114K14Rik | chr5:52190680-52197984   | 0.5769  | 0.6433  | 0.1572  | 0.597401 |
| Gm15820       | chr5:54094000-54095041   | 2.9481  | 3.2945  | 0.1603  | 0.656405 |
| Gm15975       | chr5:55624187-55625593   | 0.4302  | 0.3559  | -0.2734 | 0.574631 |
| Gm15819       | chr5:63923900-63924969   | 1.3502  | 3.2347  | 1.2605  | 0.001018 |
| Gm15824       | chr5:64190031-64190989   | 2.4647  | 3.1781  | 0.3668  | 0.416428 |
| Gm6044        | chr5:64320255-64320754   | 0.8815  | 1.1127  | 0.3360  | 0.594151 |
| Fam114a1      | chr5:64970070-65041874   | 1.1857  | 1.2927  | 0.1246  | 0.707330 |
| Chrna9        | chr5:65934920-65977326   | 0.1536  | 0.0931  | -0.7212 | 0.149648 |
| Apbb2         | chr5:66298860-66618828   | 0.1446  | 0.2352  | 0.7021  | 0.029768 |
| Gm6517        | chr5:66890363-66890884   | 7.7638  | 6.7786  | -0.1958 | 0.480367 |
| Bend4         | chr5:67392146-67427799   | 0.1752  | 0.2807  | 0.6803  | 0.064276 |
| Gm15478       | chr5:67642400-67646776   | 0.9154  | 1.3105  | 0.5176  | 0.224674 |
| Gm15477       | chr5:67847065-67909013   | 0.5579  | 0.3944  | -0.5004 | 0.207838 |
| Gm5867        | chr5:69461150-69461741   | 1.6296  | 1.7788  | 0.1264  | 0.672681 |
| Corin         | chr5:72300024-72504473   | 0.4014  | 0.4847  | 0.2722  | 0.155231 |
| Gm17207       | chr5:73210108-73212634   | 1.2961  | 1.9942  | 0.6216  | 0.040887 |
| Usp4Gos2      | chr5:74032268-74039996   | 0.7585  | 1.0401  | 0.4556  | 0.234514 |
| Rasl11b       | chr5:74195295-74199478   | 1.7110  | 1.2832  | -0.4151 | 0.040470 |
| Kit           | chr5:75574915-75656722   | 0.1645  | 0.3764  | 1.1944  | 0.023438 |
| Apc-ps1       | chr5:76196624-76197094   | 2.6097  | 3.5049  | 0.4255  | 0.273353 |
| Hopxos        | chr5:77094531-77102303   | 1.4344  | 2.1584  | 0.5895  | 0.170493 |
| Lphn3         | chr5:81020137-81825133   | 0.0985  | 0.2345  | 1.2512  | 0.102123 |
| Gm24524       | chr5:86079765-86079935   | 5.1274  | 3.1605  | -0.6981 | 0.099524 |
| Igj           | chr5:88520511-88527891   | 0.8995  | 0.5810  | -0.6306 | 0.397762 |
| Adamts3       | chr5:89673840-89883334   | 0.3237  | 0.3893  | 0.2662  | 0.242753 |
| Mthfd2l       | chr5:90931195-91021360   | 1.2187  | 0.9343  | -0.3835 | 0.215563 |
| Btc           | chr5:91357260-91402994   | 0.2763  | 0.2784  | 0.0113  | 0.980274 |
| Cdkl2         | chr5:92006073-92043042   | 0.2423  | 0.2909  | 0.2638  | 0.448739 |
| Gm22728       | chr5:92056063-92056192   | 8.6860  | 11.5923 | 0.4164  | 0.116621 |
| Art3          | chr5:92331826-92414628   | 0.2907  | 0.4680  | 0.6868  | 0.080230 |
| Gm2986        | chr5:93195797-93196179   | 4.1067  | 4.1857  | 0.0275  | 0.911355 |
| 2010109A12Rik | chr5:93206517-93213475   | 1.9562  | 1.9217  | -0.0257 | 0.938685 |
| Kat2b-ps      | chr5:93390601-93393091   | 0.4327  | 0.3862  | -0.1638 | 0.684419 |
| Rasgef1b      | chr5:99217425-99252927   | 0.2628  | 0.5277  | 1.0055  | 0.000383 |
| Plac8         | chr5:100553724-100572245 | 1.0277  | 2.3671  | 1.2038  | 0.011328 |
| Hpse          | chr5:100679483-100719716 | 0.2870  | 0.3818  | 0.4115  | 0.384320 |
| Agpat9        | chr5:100845712-100899102 | 0.2234  | 0.1953  | -0.1940 | 0.691544 |
| Spp1          | chr5:104435117-104441050 | 0.5493  | 1.6965  | 1.6268  | 0.252202 |
| C230066G23Rik | chr5:105580439-105581772 | 3.8378  | 5.1449  | 0.4229  | 0.058490 |
| Gm8145        | chr5:107241622-107242367 | 1.0966  | 1.2072  | 0.1386  | 0.702474 |
| Brdt          | chr5:107331158-107387058 | 0.7198  | 0.8390  | 0.2210  | 0.129488 |
| Ephx4         | chr5:107402735-107430035 | 0.9199  | 0.8704  | -0.0797 | 0.849327 |
| Gm17202       | chr5:107404822-107431910 | 0.5049  | 0.3814  | -0.4046 | 0.383298 |
| Btbd8         | chr5:107437996-107491628 | 0.7036  | 0.8745  | 0.3136  | 0.396737 |
| A930041C12Rik | chr5:107630249-107633850 | 1.9124  | 2.1758  | 0.1861  | 0.678102 |
| Gm26692       | chr5:107659096-107688015 | 1.4485  | 2.1274  | 0.5545  | 0.095015 |
| A430072P03Rik | chr5:107725156-107728801 | 0.9377  | 1.2786  | 0.4475  | 0.080662 |
| Evi5          | chr5:107744794-107875107 | 0.2978  | 0.2913  | -0.0316 | 0.815673 |
| Gm26387       | chr5:107907344-107907476 | 11.8155 | 13.9399 | 0.2385  | 0.404357 |
| Ccdc18        | chr5:108132913-108232947 | 0.4559  | 0.4726  | 0.0518  | 0.853958 |
| Fgfr1l        | chr5:108694228-108706950 | 0.7048  | 0.5760  | -0.2911 | 0.391748 |
| Gm17655       | chr5:110046231-110046486 | 5.5891  | 4.0101  | -0.4790 | 0.157208 |
| Gm15484       | chr5:110118021-110118849 | 0.6690  | 0.5642  | -0.2459 | 0.548664 |
| Pxmp2         | chr5:110274281-110286186 | 0.6824  | 0.8374  | 0.2953  | 0.488908 |
| Gm26711       | chr5:110385834-110388073 | 1.0187  | 1.0544  | 0.0496  | 0.887616 |

|               |                          |         |         |         |          |
|---------------|--------------------------|---------|---------|---------|----------|
| Gm22716       | chr5:110677123-110677230 | 8.7254  | 7.8649  | -0.1498 | 0.609117 |
| Gm26079       | chr5:110692048-110692181 | 11.6965 | 15.3221 | 0.3895  | 0.393782 |
| Gm26515       | chr5:110779881-110781127 | 2.0272  | 2.1597  | 0.0914  | 0.612919 |
| Mn1           | chr5:111417361-111457033 | 0.1581  | 0.1737  | 0.1358  | 0.727208 |
| Gm20636       | chr5:112374368-112377639 | 2.2152  | 1.5912  | -0.4773 | 0.038386 |
| 2900026A02Rik | chr5:113086322-113163351 | 0.0548  | 0.0873  | 0.6705  | 0.225072 |
| Acacb         | chr5:114146534-114250761 | 0.3295  | 0.3279  | -0.0069 | 0.964027 |
| Fam222a       | chr5:114568015-114613220 | 0.6185  | 0.5588  | -0.1464 | 0.740585 |
| Trpv4         | chr5:114622151-114658421 | 0.3008  | 0.3467  | 0.2050  | 0.542260 |
| 4930515G01Rik | chr5:114773736-114774983 | 2.5661  | 2.3204  | -0.1452 | 0.664899 |
| Gm13822       | chr5:114917317-114923277 | 1.8692  | 2.4764  | 0.4059  | 0.352658 |
| Cit           | chr5:115845277-116008947 | 0.1811  | 0.2605  | 0.5249  | 0.389423 |
| Gm14508       | chr5:116009315-116016105 | 3.2558  | 3.2211  | -0.0155 | 0.935313 |
| 9530046B11Rik | chr5:117115217-117118723 | 0.7998  | 0.8079  | 0.0145  | 0.979790 |
| Vsig10        | chr5:117319265-117355005 | 0.3010  | 0.6899  | 1.1965  | 0.143528 |
| Ksr2          | chr5:117413999-11775003  | 0.1185  | 0.2275  | 0.9412  | 0.042414 |
| Rnft2         | chr5:118190735-118245116 | 0.1858  | 0.1608  | -0.2088 | 0.348810 |
| Iqcd          | chr5:120589015-120607114 | 1.2457  | 1.3597  | 0.1264  | 0.719371 |
| Ccdc42b       | chr5:120628334-120634235 | 1.3639  | 1.5835  | 0.2154  | 0.389538 |
| Gm26205       | chr5:121205009-121205143 | 20.7354 | 18.0350 | -0.2013 | 0.319494 |
| Acad12        | chr5:121598283-121618938 | 0.3119  | 0.3381  | 0.1163  | 0.681563 |
| Gm16552       | chr5:121717665-121727403 | 1.5003  | 1.4735  | -0.0260 | 0.940666 |
| Gm15842       | chr5:122302421-122303039 | 4.5183  | 4.9430  | 0.1296  | 0.618826 |
| Gm15846       | chr5:122438595-122438915 | 3.0048  | 5.0048  | 0.7360  | 0.011178 |
| Morn3         | chr5:123035768-123047016 | 0.6372  | 0.7877  | 0.3057  | 0.527915 |
| Gm26745       | chr5:123047372-123230871 | 1.1762  | 1.2966  | 0.1406  | 0.563899 |
| Wdr66         | chr5:123252101-123327484 | 0.2706  | 0.3218  | 0.2497  | 0.572454 |
| Gm15747       | chr5:123393648-123397957 | 3.7614  | 3.8981  | 0.0515  | 0.856863 |
| Gm24840       | chr5:123628200-123628347 | 5.8648  | 6.4485  | 0.1369  | 0.580199 |
| Pitpnm2os2    | chr5:124194906-124200346 | 0.3782  | 0.6875  | 0.8622  | 0.024219 |
| Pitpnm2os1    | chr5:124229724-124237137 | 0.7909  | 1.1572  | 0.5491  | 0.228857 |
| Cdk2ap1       | chr5:124345416-124354671 | 1.6626  | 1.8400  | 0.1463  | 0.542682 |
| Rilp1         | chr5:124493081-124531391 | 1.2724  | 1.3877  | 0.1251  | 0.638177 |
| Dnah10        | chr5:124725084-124834308 | 0.1100  | 0.0772  | -0.5106 | 0.216156 |
| Fam101a       | chr5:125003446-125012547 | 0.4280  | 0.5305  | 0.3099  | 0.575969 |
| Gpr133        | chr5:129096749-129204599 | 0.3442  | 0.3610  | 0.0688  | 0.853522 |
| Mmp17         | chr5:129584168-129608875 | 0.2592  | 0.1726  | -0.5862 | 0.151834 |
| Gm15903       | chr5:129727045-129728385 | 4.0842  | 4.5339  | 0.1507  | 0.698787 |
| Gm23245       | chr5:129789538-129789673 | 13.2250 | 10.3471 | -0.3541 | 0.180323 |
| Snora15       | chr5:129794545-129794676 | 13.9371 | 8.5937  | -0.6976 | 0.043514 |
| Phkg1         | chr5:129863420-129898549 | 0.3785  | 0.4357  | 0.2030  | 0.589592 |
| Zbed5         | chr5:129895722-129903623 | 0.3069  | 0.3780  | 0.3010  | 0.368610 |
| Nupr1l        | chr5:129908567-129910396 | 0.3612  | 0.5157  | 0.5136  | 0.016177 |
| NA            | chr5:134176357-134176956 | 2.5084  | 1.5039  | -0.7380 | 0.000555 |
| Gm24139       | chr5:134204468-134204756 | 2.4154  | 1.7701  | -0.4485 | 0.372492 |
| Lot2          | chr5:134600267-134615023 | 1.4355  | 1.8705  | 0.3819  | 0.063097 |
| Cldn4         | chr5:134945125-134946934 | 0.6725  | 0.4348  | -0.6291 | 0.466179 |
| Abhd11os      | chr5:135012113-135013253 | 3.9455  | 3.8646  | -0.0299 | 0.911514 |
| Gm25492       | chr5:135053987-135054116 | 5.8937  | 8.0144  | 0.4434  | 0.326566 |
| Gm21839       | chr5:135643954-135644336 | 6.4929  | 4.7286  | -0.4574 | 0.224346 |
| Gm16061       | chr5:135698162-135699019 | 0.8857  | 0.5612  | -0.6584 | 0.093078 |
| Styx1l        | chr5:135747219-135778385 | 0.4188  | 0.4458  | 0.0901  | 0.806185 |
| Ssc4d         | chr5:135960210-135974531 | 0.5450  | 0.5399  | -0.0138 | 0.958982 |
| Gm16599       | chr5:136274995-136417894 | 1.8389  | 1.9214  | 0.0633  | 0.853674 |
| NA            | chr5:136345883-136350231 | 0.7122  | 0.9375  | 0.3965  | 0.045744 |
| Myl10         | chr5:136693145-136701094 | 1.6559  | 1.4659  | -0.1758 | 0.644731 |
| Ift22         | chr5:136908149-136913244 | 1.6068  | 1.8184  | 0.1785  | 0.618663 |
| 4933404O12Rik | chr5:136919145-136937112 | 0.5966  | 0.4831  | -0.3043 | 0.268288 |
| Ufsp1         | chr5:137294668-137295664 | 2.7025  | 2.8427  | 0.0730  | 0.744282 |
| Epo           | chr5:137482258-137533242 | 0.7180  | 0.8626  | 0.2647  | 0.565875 |
| Gm17112       | chr5:137532422-137540718 | 3.3912  | 3.4161  | 0.0106  | 0.968233 |
| Irs3          | chr5:137643031-137645714 | 0.2934  | 0.2652  | -0.1458 | 0.705581 |
| Gm15753       | chr5:137720353-137721740 | 1.4081  | 1.4224  | 0.0145  | 0.949865 |
| Pilra         | chr5:137821951-137836268 | 1.1654  | 1.1011  | -0.0818 | 0.692645 |
| Mir25         | chr5:138165320-138165404 | 15.6270 | 18.6421 | 0.2545  | 0.300981 |
| Mir106b       | chr5:138165736-138165818 | 7.0063  | 7.8355  | 0.1614  | 0.797378 |
| Mblac1        | chr5:138194313-138195621 | 1.1254  | 0.8544  | -0.3975 | 0.154146 |
| Stag3         | chr5:138280239-138312393 | 0.2096  | 0.2211  | 0.0770  | 0.903581 |
| Gm10874       | chr5:138363718-138388287 | 0.2669  | 0.3923  | 0.5557  | 0.271075 |
| Got2-ps1      | chr5:138364172-138365580 | 0.4951  | 0.5973  | 0.2710  | 0.528404 |
| Gm15497       | chr5:138610738-138611289 | 4.0418  | 4.2077  | 0.0580  | 0.651777 |

|                      |                          |         |          |         |          |
|----------------------|--------------------------|---------|----------|---------|----------|
| <i>Prkar1b</i>       | chr5:139017305-139150001 | 0.2426  | 0.3014   | 0.3131  | 0.382138 |
| <i>3110082117Rik</i> | chr5:139359738-139460502 | 1.4056  | 1.3620   | -0.0454 | 0.863639 |
| <i>NA</i>            | chr5:139378219-139379259 | 2.1749  | 1.4316   | -0.6033 | 0.153274 |
| <i>Gm26938</i>       | chr5:139807977-139826407 | 4.2621  | 3.9861   | -0.0966 | 0.635860 |
| <i>Gm16121</i>       | chr5:140101198-140107591 | 0.7767  | 0.9128   | 0.2329  | 0.271897 |
| <i>Gm16120</i>       | chr5:140207384-140210751 | 4.0850  | 4.3714   | 0.0978  | 0.709022 |
| <i>Snx8</i>          | chr5:140340303-140389251 | 0.7245  | 0.5595   | -0.3727 | 0.140770 |
| <i>Grifin</i>        | chr5:140563118-140565071 | 3.0379  | 2.9881   | -0.0238 | 0.936495 |
| <i>D430018E03Rik</i> | chr5:142874076-142878373 | 0.1484  | 0.1999   | 0.4294  | 0.204406 |
| <i>D130017N08Rik</i> | chr5:143758324-143767130 | 0.5582  | 0.6696   | 0.2626  | 0.165199 |
| <i>Gm17135</i>       | chr5:143922576-143980991 | 1.2016  | 1.1958   | -0.0070 | 0.990398 |
| <i>Rsph10b</i>       | chr5:143933034-143985719 | 1.2559  | 1.3034   | 0.0536  | 0.705847 |
| <i>Gm26925</i>       | chr5:144110815-144111772 | 2.0350  | 1.6246   | -0.3250 | 0.160002 |
| <i>Gm15739</i>       | chr5:146248550-146249422 | 1.2534  | 1.0600   | -0.2418 | 0.472519 |
| <i>Gm25091</i>       | chr5:146834833-146834904 | 14.7062 | 12.7280  | -0.2084 | 0.455209 |
| <i>Gm23202</i>       | chr5:146835143-146835272 | 19.2013 | 19.9161  | 0.0527  | 0.842540 |
| <i>Flt3</i>          | chr5:147330740-147400489 | 0.2783  | 0.6074   | 1.1260  | 0.036462 |
| <i>5730422E09Rik</i> | chr5:149119564-149184063 | 0.9356  | 0.9813   | 0.0689  | 0.754196 |
| <i>Alox5ap</i>       | chr5:149265057-149288045 | 1.4176  | 2.1342   | 0.5902  | 0.313680 |
| <i>Hsph1</i>         | chr5:149614286-149636376 | 8.5447  | 6.2708   | -0.4464 | 0.217432 |
| <i>D730045B01Rik</i> | chr5:151368863-151369172 | 3.6218  | 3.8540   | 0.0897  | 0.761454 |
| <i>Gm9835</i>        | chr6:4893351-4893777     | 1.1267  | 0.6864   | -0.7151 | 0.190259 |
| <i>Pon3</i>          | chr6:5220851-5256286     | 0.3430  | 0.3952   | 0.2043  | 0.740712 |
| <i>1110019D14Rik</i> | chr6:13871525-14044373   | 0.7416  | 0.9865   | 0.4118  | 0.082510 |
| <i>Gm26738</i>       | chr6:17834584-17835185   | 1.6195  | 1.5438   | -0.0691 | 0.871617 |
| <i>Gm26809</i>       | chr6:18844219-18847360   | 0.8543  | 1.0599   | 0.3112  | 0.262889 |
| <i>Wnt16</i>         | chr6:22288226-22298522   | 0.1276  | 0.2154   | 0.7555  | 0.085329 |
| <i>Lrrc4</i>         | chr6:28661830-28831747   | 0.4432  | 0.6708   | 0.5980  | 0.184360 |
| <i>Fam71f2</i>       | chr6:29279592-29290680   | 0.3511  | 0.3855   | 0.1351  | 0.867380 |
| <i>Opn1sw</i>        | chr6:29376670-29388468   | 0.4371  | 0.5355   | 0.2927  | 0.157646 |
| <i>Gm9047</i>        | chr6:29471436-29473465   | 1.2676  | 1.6741   | 0.4013  | 0.469351 |
| <i>Gm25580</i>       | chr6:30143800-30144127   | 2.3109  | 3.2473   | 0.4908  | 0.034107 |
| <i>Mir29a</i>        | chr6:31062659-31062747   | 8.9734  | 8.9515   | -0.0035 | 0.991465 |
| <i>Gm27019</i>       | chr6:31063091-31063495   | 3.3240  | 4.4144   | 0.4093  | 0.307494 |
| <i>Gm13834</i>       | chr6:31087608-31087912   | 6.3515  | 7.4824   | 0.2364  | 0.398981 |
| <i>Gm13835</i>       | chr6:31141978-31142663   | 2.6034  | 2.7649   | 0.0868  | 0.641708 |
| <i>Podxl</i>         | chr6:31519487-31563981   | 0.4595  | 0.6330   | 0.4622  | 0.167470 |
| <i>Gm13854</i>       | chr6:33375110-33377446   | 0.5255  | 0.4218   | -0.3170 | 0.512566 |
| <i>2010107G12Rik</i> | chr6:34945277-34979054   | 0.1878  | 0.1407   | -0.4160 | 0.487723 |
| <i>Zc3hav1l</i>      | chr6:38287395-38299259   | 0.5154  | 0.5378   | 0.0616  | 0.787750 |
| <i>Gm15697</i>       | chr6:38542302-38546074   | 0.4400  | 0.6529   | 0.5692  | 0.134415 |
| <i>Tbxas1</i>        | chr6:38875403-39084585   | 0.1478  | 0.1800   | 0.2845  | 0.426284 |
| <i>Gm16272</i>       | chr6:39584091-39592784   | 3.6388  | 3.9625   | 0.1229  | 0.653572 |
| <i>Mrps33</i>        | chr6:39801803-39810988   | 2.7660  | 2.1796   | -0.3437 | 0.317580 |
| <i>Trbv21</i>        | chr6:41202754-41203044   | 4.9768  | 4.3417   | -0.1970 | 0.500386 |
| <i>Trbv23</i>        | chr6:41216072-41216526   | 11.4602 | 10.4989  | -0.1264 | 0.476227 |
| <i>Trbv30</i>        | chr6:41281375-41281990   | 10.0437 | 8.4916   | -0.2422 | 0.370064 |
| <i>Trbd2</i>         | chr6:41542162-41542176   | 82.9707 | 110.2023 | 0.4095  | 0.363609 |
| <i>Sva</i>           | chr6:42038393-42042851   | 5.5775  | 0.0299   | -7.5456 | 0.000055 |
| <i>Clcn1</i>         | chr6:42286684-42315756   | 0.1550  | 0.1972   | 0.3480  | 0.339878 |
| <i>Arhgef5</i>       | chr6:43265581-43289320   | 0.1426  | 0.1754   | 0.2983  | 0.202679 |
| <i>A930035D04Rik</i> | chr6:47453775-47454320   | 1.1098  | 0.8979   | -0.3057 | 0.580391 |
| <i>Rny3</i>          | chr6:47781623-47781725   | 41.3799 | 35.3671  | -0.2265 | 0.552920 |
| <i>Rny1</i>          | chr6:47788068-47788180   | 20.9845 | 16.6938  | -0.3300 | 0.461676 |
| <i>Mir704</i>        | chr6:47803575-47803652   | 32.7776 | 34.9988  | 0.0946  | 0.754722 |
| <i>Zfp786</i>        | chr6:47819265-47830867   | 0.2821  | 0.2172   | -0.3767 | 0.429499 |
| <i>Sspo</i>          | chr6:48448228-48501250   | 0.0373  | 0.0717   | 0.9418  | 0.059455 |
| <i>Gm7887</i>        | chr6:48524371-48525105   | 0.6672  | 0.9898   | 0.5690  | 0.251454 |
| <i>Rarres2</i>       | chr6:48569697-48572670   | 2.7939  | 2.8485   | 0.0279  | 0.876409 |
| <i>Repin1</i>        | chr6:48593882-48599082   | 0.6891  | 0.9213   | 0.4189  | 0.158407 |
| <i>A1854703</i>      | chr6:48626763-48633689   | 0.8006  | 0.8106   | 0.0180  | 0.897237 |
| <i>Tmem176b</i>      | chr6:48833810-48841374   | 1.0822  | 1.7492   | 0.6927  | 0.030523 |
| <i>Tmem176a</i>      | chr6:48841482-48845364   | 1.4520  | 2.0877   | 0.5239  | 0.093197 |
| <i>GpnmB</i>         | chr6:49036517-49058182   | 0.6630  | 0.5654   | -0.2298 | 0.620529 |
| <i>Fam221a</i>       | chr6:49367738-49389905   | 0.4392  | 0.5633   | 0.3591  | 0.366146 |
| <i>5430402O13Rik</i> | chr6:50566642-50594865   | 2.3770  | 2.7217   | 0.1954  | 0.384429 |
| <i>Hoxa2</i>         | chr6:52162350-52165413   | 0.3159  | 0.2486   | -0.3457 | 0.335517 |
| <i>Hoxaas3</i>       | chr6:52175216-52215076   | 0.1686  | 0.2998   | 0.8307  | 0.152403 |
| <i>Gm15527</i>       | chr6:54245741-54279076   | 0.2740  | 0.3930   | 0.5204  | 0.241935 |
| <i>9130019P16Rik</i> | chr6:54269680-54430221   | 0.4157  | 0.4454   | 0.0996  | 0.716185 |
| <i>Plekha8</i>       | chr6:54595110-54645839   | 0.2520  | 0.4881   | 0.9540  | 0.207052 |

|                      |                          |        |        |         |          |
|----------------------|--------------------------|--------|--------|---------|----------|
| <i>Lsm5</i>          | chr6:56701062-56704692   | 3.5753 | 3.6069 | 0.0127  | 0.934473 |
| <i>Rps15-ps2</i>     | chr6:58017489-58017975   | 2.5019 | 2.6713 | 0.0945  | 0.653368 |
| <i>Nap1l5</i>        | chr6:58905233-58907126   | 1.3259 | 1.4019 | 0.0804  | 0.681882 |
| <i>Gm17147</i>       | chr6:65128570-65129002   | 1.1845 | 1.0028 | -0.2402 | 0.589024 |
| <i>E230016M11Rik</i> | chr6:67036598-67080654   | 1.1246 | 1.1145 | -0.0130 | 0.931389 |
| <i>Thnsl2</i>        | chr6:71128165-71144346   | 0.7976 | 0.7819 | -0.0287 | 0.931291 |
| <i>Cd8a</i>          | chr6:71373426-71379171   | 0.3296 | 0.2028 | -0.7005 | 0.118645 |
| <i>Reep1</i>         | chr6:71707560-71810710   | 0.8577 | 0.8354 | -0.0381 | 0.873196 |
| <i>St3gal5</i>       | chr6:72097612-72154570   | 0.1830 | 0.3951 | 1.1103  | 0.193639 |
| <i>Hk2</i>           | chr6:82725024-82774454   | 0.2479 | 0.4001 | 0.6907  | 0.041575 |
| <i>Gm15624</i>       | chr6:83166151-83172733   | 1.6606 | 1.5899 | -0.0628 | 0.767108 |
| <i>Slc4a5</i>        | chr6:83219827-83304945   | 0.1388 | 0.2902 | 1.0642  | 0.010067 |
| <i>Actg2</i>         | chr6:83512904-83536265   | 0.4450 | 0.6929 | 0.6389  | 0.449308 |
| <i>Ankrd53</i>       | chr6:83762643-83768326   | 0.6493 | 0.8840 | 0.4451  | 0.261632 |
| <i>Npm3-ps1</i>      | chr6:85076191-85076719   | 1.3874 | 1.2492 | -0.1513 | 0.791512 |
| <i>Sfxn5</i>         | chr6:85213050-85333422   | 0.4569 | 0.5582 | 0.2890  | 0.150879 |
| <i>Rab11fip5</i>     | chr6:85334962-85374634   | 0.3444 | 0.5619 | 0.7062  | 0.205811 |
| <i>Fbxo41</i>        | chr6:85469573-85502994   | 0.3321 | 0.4232 | 0.3495  | 0.214476 |
| <i>A430078I02Rik</i> | chr6:86470804-86480830   | 1.0382 | 1.1656 | 0.1670  | 0.421545 |
| <i>Anxa4</i>         | chr6:86736839-86793584   | 0.5657 | 0.8966 | 0.6645  | 0.131382 |
| <i>Gm5577</i>        | chr6:87980882-88005471   | 0.9475 | 1.2675 | 0.4198  | 0.030359 |
| <i>Podxl2</i>        | chr6:88842557-88875044   | 0.1277 | 0.1293 | 0.0184  | 0.979103 |
| <i>Gm15612</i>       | chr6:88842853-88847274   | 0.4453 | 0.4697 | 0.0770  | 0.798345 |
| <i>Gm26811</i>       | chr6:89304629-89327621   | 0.3146 | 0.2393 | -0.3950 | 0.068203 |
| <i>Chchd6</i>        | chr6:89383145-89595652   | 0.7794 | 0.9426 | 0.2742  | 0.294304 |
| <i>Gm20426</i>       | chr6:90231727-90232788   | 3.1216 | 3.4440 | 0.1418  | 0.402827 |
| <i>Hdac11</i>        | chr6:91156664-91174692   | 0.7036 | 0.7951 | 0.1764  | 0.475154 |
| <i>Mitf</i>          | chr6:97807057-98021349   | 0.3374 | 0.3588 | 0.0884  | 0.782359 |
| <i>Tpt1-ps3</i>      | chr6:99877746-99878433   | 1.7595 | 2.2754 | 0.3710  | 0.251483 |
| <i>Chl1</i>          | chr6:103510875-103733035 | 0.1356 | 0.1632 | 0.2677  | 0.460474 |
| <i>Gm4604</i>        | chr6:108140119-108140509 | 9.7220 | 8.6335 | -0.1713 | 0.710757 |
| <i>Gm16433</i>       | chr6:108563444-108565693 | 0.9425 | 1.1401 | 0.2746  | 0.190815 |
| <i>Gm15519</i>       | chr6:112563641-112565207 | 1.1539 | 0.7454 | -0.6305 | 0.038714 |
| <i>Gm5578</i>        | chr6:112605543-112606779 | 1.0426 | 0.8967 | -0.2176 | 0.465857 |
| <i>Srgap3</i>        | chr6:112717970-112947266 | 0.0289 | 0.0532 | 0.8796  | 0.365521 |
| <i>Gm16161</i>       | chr6:113275836-113276930 | 4.3586 | 4.2831 | -0.0252 | 0.909287 |
| <i>Il17rc</i>        | chr6:113471426-113483140 | 0.2096 | 0.2251 | 0.1028  | 0.831723 |
| <i>Prrt3</i>         | chr6:113494094-113501818 | 0.3930 | 0.4078 | 0.0530  | 0.901914 |
| <i>Ghrl</i>          | chr6:113716118-113719880 | 5.8578 | 6.2571 | 0.0951  | 0.597855 |
| <i>Gm14335</i>       | chr6:115638249-115639059 | 2.8923 | 2.9550 | 0.0309  | 0.903755 |
| <i>Ift122</i>        | chr6:115853469-115926699 | 0.3516 | 0.4262 | 0.2773  | 0.384909 |
| <i>Gm20404</i>       | chr6:116107650-116127493 | 1.4171 | 1.5589 | 0.1376  | 0.668003 |
| <i>Zfand4</i>        | chr6:116264221-116330298 | 0.3769 | 0.2674 | -0.4953 | 0.409848 |
| <i>March8</i>        | chr6:116338023-116409540 | 0.1224 | 0.1355 | 0.1472  | 0.646647 |
| <i>Rassf4</i>        | chr6:116633007-116673836 | 0.1678 | 0.3370 | 1.0061  | 0.008049 |
| <i>Fxyd4</i>         | chr6:117933728-117937335 | 1.0034 | 1.2450 | 0.3113  | 0.307694 |
| <i>Gm4875</i>        | chr6:117997206-117997992 | 0.8155 | 0.7665 | -0.0894 | 0.831397 |
| <i>Rasgef1a</i>      | chr6:118066384-118091546 | 0.9116 | 1.1411 | 0.3240  | 0.446062 |
| <i>Ret</i>           | chr6:118151747-118197744 | 0.0676 | 0.0374 | -0.8544 | 0.353198 |
| <i>Zfp248</i>        | chr6:118427318-118455528 | 0.6126 | 0.6079 | -0.0112 | 0.957625 |
| <i>Lrtm2</i>         | chr6:119315132-119330766 | 0.1298 | 0.1523 | 0.2300  | 0.755673 |
| <i>Wnt5b</i>         | chr6:119432530-119544347 | 1.0535 | 0.5705 | -0.8850 | 0.033557 |
| <i>Cecr6</i>         | chr6:120488938-120493807 | 0.3870 | 0.5683 | 0.5544  | 0.038924 |
| <i>Gm24391</i>       | chr6:120524896-120524998 | 4.0272 | 8.2017 | 1.0261  | 0.108726 |
| <i>Cecr2</i>         | chr6:120666368-120771190 | 0.0708 | 0.1052 | 0.5721  | 0.271150 |
| <i>Tuba8</i>         | chr6:121210733-121226854 | 0.2339 | 0.3599 | 0.6218  | 0.271049 |
| <i>Klrg1</i>         | chr6:122270595-122282882 | 0.3242 | 0.6967 | 1.1036  | 0.106122 |
| <i>C3ar1</i>         | chr6:122847137-122856161 | 0.1517 | 0.1294 | -0.2294 | 0.604131 |
| <i>Cd163</i>         | chr6:124304650-124330527 | 0.5880 | 0.6103 | 0.0535  | 0.862963 |
| <i>Eno2</i>          | chr6:124760052-124769673 | 0.5375 | 0.5118 | -0.0708 | 0.761834 |
| <i>Spsb2</i>         | chr6:124808660-124810619 | 1.6698 | 1.5043 | -0.1505 | 0.450013 |
| <i>Gpr162</i>        | chr6:124858443-124863917 | 0.2914 | 0.2733 | -0.0927 | 0.816644 |
| <i>A230083G16Rik</i> | chr6:124916862-124925844 | 0.6815 | 0.6724 | -0.0193 | 0.943701 |
| <i>Piamp</i>         | chr6:124996693-125003096 | 0.2646 | 0.3159 | 0.2559  | 0.650470 |
| <i>Gm23751</i>       | chr6:125121723-125121859 | 8.5774 | 9.3196 | 0.1197  | 0.557022 |
| <i>Plekhg6</i>       | chr6:125362659-125380793 | 0.3969 | 0.3788 | -0.0674 | 0.862947 |
| <i>NA</i>            | chr6:125494423-125509135 | 1.1053 | 1.2418 | 0.1681  | 0.332120 |
| <i>Rad51ap1</i>      | chr6:126923049-126939587 | 0.5785 | 0.7634 | 0.4001  | 0.381267 |
| <i>Gm26845</i>       | chr6:127108388-127110467 | 0.7730 | 0.7614 | -0.0219 | 0.909170 |
| <i>9330179D12Rik</i> | chr6:127149388-127212411 | 1.6864 | 2.0329 | 0.2696  | 0.226109 |
| <i>Foxm1</i>         | chr6:128362966-128375893 | 0.5553 | 0.8953 | 0.6891  | 0.084146 |

|                      |                          |         |         |           |          |
|----------------------|--------------------------|---------|---------|-----------|----------|
| <i>Klrb1c</i>        | chr6:128778484-128789215 | 0.7065  | 1.1391  | 0.6892    | 0.236071 |
| <i>Gm26656</i>       | chr6:128843785-128846959 | 1.1039  | 1.4407  | 0.3842    | 0.212986 |
| <i>BC064078</i>      | chr6:128992960-129008040 | 0.5940  | 0.9481  | 0.6744    | 0.155401 |
| <i>Klrb1f</i>        | chr6:129045900-129057471 | 0.4212  | 0.5757  | 0.4507    | 0.382955 |
| <i>Klrk1</i>         | chr6:129610322-129623864 | 0.8307  | 0.7404  | -0.1659   | 0.636104 |
| <i>Gm17089</i>       | chr6:134233157-134243711 | 1.0757  | 1.8506  | 0.7827    | 0.073517 |
| <i>Bcl2l14</i>       | chr6:134396317-134438736 | 0.3353  | 0.4676  | 0.4796    | 0.202074 |
| <i>Mansc1</i>        | chr6:134609209-134632488 | 1.3315  | 1.2060  | -0.1429   | 0.421329 |
| <i>Emp1</i>          | chr6:135362930-135383173 | 1.0443  | 1.3041  | 0.3206    | 0.687471 |
| <i>B230216G23Rik</i> | chr6:142413440-142419730 | 0.5149  | 0.5900  | 0.1966    | 0.555986 |
| <i>Bcat1</i>         | chr6:144993834-145076184 | 0.1098  | 0.1648  | 0.5855    | 0.047797 |
| <i>Gm15706</i>       | chr6:145250528-145251849 | 3.0697  | 4.3767  | 0.5117    | 0.014370 |
| <i>Gm15720</i>       | chr6:146463325-146463607 | 6.8461  | 4.8555  | -0.4957   | 0.043712 |
| <i>Gm6654</i>        | chr6:146647240-146647588 | 1.9366  | 1.5084  | -0.3605   | 0.148057 |
| <i>Mansc4</i>        | chr6:147075059-147087032 | 0.4162  | 0.5749  | 0.4660    | 0.291140 |
| <i>Gm6288</i>        | chr6:147442801-147476046 | 0.8464  | 0.4720  | -0.8426   | 0.003653 |
| <i>Bicd1</i>         | chr6:149408983-149563329 | 0.0357  | 0.0817  | 1.1917    | 0.141476 |
| <i>Myadm</i>         | chr7:3289037-3299345     | 0.1958  | 0.5717  | 1.5459    | 0.000076 |
| <i>Gm15929</i>       | chr7:3666251-3670278     | 2.2702  | 2.4573  | 0.1142    | 0.392708 |
| <i>Pirb</i>          | chr7:3711408-3720391     | 0.3294  | 0.6439  | 0.9671    | 0.009054 |
| <i>Gm7363</i>        | chr7:3983786-3984187     | 2.3203  | 1.8204  | -0.3501   | 0.312622 |
| <i>Ttyh1</i>         | chr7:4119407-4136706     | 0.4359  | 0.5411  | 0.3119    | 0.220497 |
| <i>Gm15494</i>       | chr7:4445696-4471249     | 2.9934  | 1.4072  | -1.0890   | 0.189105 |
| <i>Gm15494</i>       | chr7:4446445-4471285     | 2.4157  | 1.2848  | -0.9109   | 0.202169 |
| <i>Tntt1</i>         | chr7:4504569-4516382     | 1.7496  | 1.3857  | -0.3365   | 0.189558 |
| <i>Dnaaf3</i>        | chr7:4522932-4532453     | 0.2243  | 0.3185  | 0.5060    | 0.116574 |
| <i>Tmem238</i>       | chr7:4784594-4789656     | 1.8479  | 1.2052  | -0.6166   | 0.015070 |
| <i>Nat14</i>         | chr7:4922250-4925006     | 0.8384  | 0.7670  | -0.1285   | 0.707262 |
| <i>Zfp580</i>        | chr7:5051531-5053722     | 1.1479  | 0.8640  | -0.4099   | 0.153220 |
| <i>Ccdc106</i>       | chr7:5056151-5060785     | 0.7093  | 0.5374  | -0.4006   | 0.315749 |
| <i>Gm6792</i>        | chr7:6252709-6282066     | 0.6949  | 0.4921  | -0.412880 | 0.412880 |
| <i>Zfp583</i>        | chr7:6315659-6331285     | 0.6018  | 0.5967  | -0.0123   | 0.949626 |
| <i>Vmn2r29</i>       | chr7:7231326-7278289     | 0.3407  | 0.3419  | 0.0050    | 0.986256 |
| <i>Zscan18</i>       | chr7:12768091-12775658   | 1.0240  | 1.1816  | 0.2066    | 0.184636 |
| <i>Z310014L17Rik</i> | chr7:12927415-12931072   | 0.6243  | 0.6536  | 0.0661    | 0.713016 |
| <i>1810019N24Rik</i> | chr7:12948591-12961768   | 0.5445  | 0.7209  | 0.4049    | 0.223464 |
| <i>Mzf1</i>          | chr7:13042302-13054764   | 0.4708  | 0.4846  | 0.0416    | 0.792219 |
| <i>Npas1</i>         | chr7:16455720-16476780   | 0.5740  | 0.4118  | -0.4791   | 0.146187 |
| <i>Pglyrp1</i>       | chr7:18884689-18890438   | 4.5766  | 5.6849  | 0.3129    | 0.442335 |
| <i>Six5</i>          | chr7:19094593-19098549   | 0.2415  | 0.2408  | -0.0039   | 0.988431 |
| <i>Fosb</i>          | chr7:19302720-19310045   | 0.4630  | 0.5047  | 0.1243    | 0.756958 |
| <i>Mir343</i>        | chr7:19386642-19386717   | 29.6641 | 20.2810 | -0.5486   | 0.000830 |
| <i>A930016O22Rik</i> | chr7:19418811-19421417   | 0.5383  | 0.5991  | 0.1544    | 0.609829 |
| <i>Zfp296</i>        | chr7:19577286-19580656   | 0.5958  | 0.4272  | -0.4798   | 0.270906 |
| <i>Gm16175</i>       | chr7:19809608-19811872   | 6.0931  | 7.6150  | 0.3217    | 0.240956 |
| <i>Gm16174</i>       | chr7:19816552-19818625   | 5.0407  | 5.8792  | 0.2220    | 0.592106 |
| <i>Gm16184</i>       | chr7:19911824-19912397   | 4.8833  | 5.3328  | 0.1270    | 0.627170 |
| <i>Zfp112</i>        | chr7:24112313-24127952   | 0.8092  | 0.8746  | 0.1122    | 0.588905 |
| <i>Zfp108</i>        | chr7:24257643-24261914   | 0.6458  | 0.6944  | 0.1048    | 0.704684 |
| <i>Zfp93</i>         | chr7:24270419-24276827   | 1.5076  | 1.4615  | -0.0449   | 0.828723 |
| <i>Irgc1</i>         | chr7:24431921-24435534   | 1.0100  | 0.9764  | -0.0488   | 0.891523 |
| <i>Plaur</i>         | chr7:24462499-24475873   | 1.5583  | 1.6971  | 0.1231    | 0.586273 |
| <i>Zfp428</i>        | chr7:24507005-24515682   | 0.8737  | 0.7025  | -0.3146   | 0.414275 |
| <i>Cd177</i>         | chr7:24743984-24760311   | 0.4055  | 0.4522  | 0.1573    | 0.658104 |
| <i>Atp1a3</i>        | chr7:24978166-25005957   | 0.2298  | 0.2764  | 0.2668    | 0.663742 |
| <i>4732471J01Rik</i> | chr7:25384804-25385573   | 8.4674  | 9.2432  | 0.1265    | 0.439635 |
| <i>Gm15495</i>       | chr7:25442151-25443463   | 0.4914  | 0.6040  | 0.2977    | 0.481600 |
| <i>B3gnt8</i>        | chr7:25627623-25629490   | 0.6913  | 0.6712  | -0.0426   | 0.887473 |
| <i>Gm26707</i>       | chr7:25816653-25820654   | 0.2704  | 0.2022  | -0.4196   | 0.352367 |
| <i>Cyp2t4</i>        | chr7:27153713-27158668   | 2.1005  | 2.0764  | -0.0166   | 0.944556 |
| <i>Mir3101</i>       | chr7:27176005-27176093   | 24.7153 | 26.3834 | 0.0942    | 0.546173 |
| <i>Sptbn4</i>        | chr7:27356382-27447686   | 0.1273  | 0.0960  | -0.4073   | 0.663235 |
| <i>Prx</i>           | chr7:27499323-27520214   | 0.3562  | 0.5031  | 0.4979    | 0.135973 |
| <i>NA</i>            | chr7:27984855-27985796   | 3.2923  | 2.8339  | -0.2163   | 0.061469 |
| <i>Fbl</i>           | chr7:28169747-28179269   | 2.5149  | 2.9342  | 0.2225    | 0.396868 |
| <i>Eid2</i>          | chr7:28267880-28269165   | 1.7745  | 1.7392  | -0.0290   | 0.936573 |
| <i>Rps16</i>         | chr7:28350651-28352696   | 2.3059  | 3.7713  | 0.7097    | 0.003548 |
| <i>AF357399</i>      | chr7:28351507-28351632   | 5.9906  | 7.9094  | 0.4009    | 0.262176 |
| <i>Lrfn1</i>         | chr7:28458657-28467483   | 0.2492  | 0.3258  | 0.3867    | 0.052935 |
| <i>Fbxo27</i>        | chr7:28692848-28699338   | 0.6991  | 0.7435  | 0.0888    | 0.728783 |
| <i>Lgals7</i>        | chr7:28863852-28866284   | 0.6723  | 0.6140  | -0.1308   | 0.855855 |



|                      |                        |         |         |         |          |
|----------------------|------------------------|---------|---------|---------|----------|
| <i>Ryr1</i>          | chr7:29003339-29125151 | 0.0727  | 0.0845  | 0.2161  | 0.497385 |
| <i>Ggn</i>           | chr7:29170219-29173933 | 0.5010  | 0.6505  | 0.3768  | 0.085361 |
| <i>Catsperg1</i>     | chr7:29181320-29214035 | 0.0580  | 0.0579  | -0.0024 | 0.995659 |
| <i>Kcnk6</i>         | chr7:29221927-29232522 | 0.4337  | 0.7390  | 0.7689  | 0.162712 |
| <i>C230062116Rik</i> | chr7:29953620-29955992 | 1.2812  | 1.2764  | -0.0054 | 0.972225 |
| <i>Gm10169</i>       | chr7:29965099-29965640 | 1.8884  | 1.2893  | -0.5506 | 0.097279 |
| <i>Gm5113</i>        | chr7:30169874-30180209 | 1.0619  | 1.2142  | 0.1934  | 0.476683 |
| <i>Wdr62</i>         | chr7:30240137-30280419 | 0.6759  | 0.6805  | 0.0099  | 0.950192 |
| <i>Clip3</i>         | chr7:30291671-30308367 | 0.1195  | 0.1429  | 0.2577  | 0.739956 |
| <i>Gm24757</i>       | chr7:30311524-30311895 | 7.9021  | 9.6367  | 0.2863  | 0.309133 |
| <i>Syne4</i>         | chr7:30314806-30319046 | 0.5218  | 0.5873  | 0.1706  | 0.475019 |
| <i>Aplp1</i>         | chr7:30434980-30445582 | 0.6468  | 1.1770  | 0.8637  | 0.156906 |
| <i>Arhgap33</i>      | chr7:30522225-30534180 | 0.1612  | 0.2597  | 0.6884  | 0.171887 |
| <i>Psenen</i>        | chr7:30561867-30563184 | 3.6200  | 3.4463  | -0.0709 | 0.718255 |
| <i>Upk1a</i>         | chr7:30603091-30612734 | 0.4757  | 0.2783  | -0.7736 | 0.136663 |
| <i>Gm26610</i>       | chr7:30650384-30652711 | 1.2067  | 1.3615  | 0.1741  | 0.450789 |
| <i>Atp4a</i>         | chr7:30712208-30725535 | 0.2527  | 0.1534  | -0.7206 | 0.045670 |
| <i>Sbsn</i>          | chr7:30734738-30756134 | 0.9963  | 1.0355  | 0.0558  | 0.800757 |
| <i>Gm26935</i>       | chr7:30737652-30748437 | 1.7758  | 1.6316  | -0.1221 | 0.801139 |
| <i>Ffar2</i>         | chr7:30818356-30823775 | 0.5358  | 1.1359  | 1.0840  | 0.101973 |
| <i>Gm12774</i>       | chr7:34383658-34384074 | 6.5808  | 6.5650  | -0.0035 | 0.987963 |
| <i>Rhpn2</i>         | chr7:35334174-35392285 | 0.5310  | 0.5921  | 0.1569  | 0.553827 |
| <i>E130304102Rik</i> | chr7:35802592-35803027 | 4.2751  | 3.0011  | -0.5105 | 0.014710 |
| <i>Gm20449</i>       | chr7:41399377-41499417 | 0.1671  | 0.1734  | 0.0530  | 0.926664 |
| <i>Gm15470</i>       | chr7:41490350-41491721 | 2.1348  | 2.0812  | -0.0366 | 0.615822 |
| <i>9830147E19Rik</i> | chr7:42609525-42642588 | 0.1595  | 0.1948  | 0.2880  | 0.471704 |
| <i>Gm5595</i>        | chr7:42660104-42692718 | 0.4463  | 0.4694  | 0.0728  | 0.874357 |
| <i>Siglecg</i>       | chr7:43408203-43418358 | 0.2047  | 0.4273  | 1.0617  | 0.037990 |
| <i>Vsig10l</i>       | chr7:43463150-43471913 | 0.1901  | 0.3145  | 0.7262  | 0.172589 |
| <i>2310002F09Rik</i> | chr7:43695208-43797945 | 0.4181  | 0.6012  | 0.5239  | 0.223738 |
| <i>Klk9</i>          | chr7:43791890-43796756 | 0.7349  | 0.9680  | 0.3974  | 0.452213 |
| <i>Gm26247</i>       | chr7:44248089-44248180 | 39.9454 | 39.8401 | -0.0038 | 0.970464 |
| <i>Snord88c</i>      | chr7:44249851-44249941 | 8.5545  | 8.8039  | 0.0415  | 0.947711 |
| <i>Gm23991</i>       | chr7:44250449-44250542 | 24.1673 | 27.0116 | 0.1605  | 0.370594 |
| <i>Clec11a</i>       | chr7:44303769-44306959 | 1.2182  | 1.3250  | 0.1212  | 0.591660 |
| <i>Fam71e1</i>       | chr7:44496587-44501134 | 1.6910  | 1.6960  | 0.0042  | 0.991178 |
| <i>Napsa</i>         | chr7:44572431-44586862 | 0.6707  | 1.7201  | 1.3586  | 0.013554 |
| <i>Zfp473</i>        | chr7:44731480-44751050 | 0.1691  | 0.1624  | -0.0582 | 0.836035 |
| <i>Rras</i>          | chr7:45017977-45021646 | 1.8284  | 2.6894  | 0.5567  | 0.028543 |
| <i>Prrg2</i>         | chr7:45053612-45062677 | 1.0844  | 0.9173  | -0.2414 | 0.150263 |
| <i>Mir150</i>        | chr7:45121756-45121821 | 14.9798 | 15.3781 | 0.0379  | 0.947702 |
| <i>Snord35a</i>      | chr7:45126345-45126435 | 25.5041 | 29.5763 | 0.2137  | 0.399268 |
| <i>Snord33</i>       | chr7:45126863-45126947 | 24.0734 | 31.8208 | 0.4025  | 0.032735 |
| <i>Dkk1l</i>         | chr7:45207524-45211883 | 1.0561  | 1.1585  | 0.1334  | 0.859252 |
| <i>Gm22478</i>       | chr7:45388530-45388684 | 10.8830 | 10.7788 | -0.0139 | 0.946152 |
| <i>Lhb</i>           | chr7:45418352-45421854 | 0.2783  | 0.3335  | 0.2606  | 0.438651 |
| <i>Dhdh</i>          | chr7:45472955-45488805 | 0.3314  | 0.4194  | 0.3401  | 0.493219 |
| <i>Tulp2</i>         | chr7:45486261-45523632 | 0.2510  | 0.5701  | 1.1835  | 0.110504 |
| <i>0610005C13Rik</i> | chr7:45567794-45575327 | 0.3011  | 0.4198  | 0.4794  | 0.107485 |
| <i>Sec1</i>          | chr7:45677688-45694402 | 0.3713  | 0.1645  | -1.1741 | 0.023984 |
| <i>Car11</i>         | chr7:45699842-45704682 | 0.4889  | 0.6250  | 0.3544  | 0.239626 |
| <i>Fam83e</i>        | chr7:45721211-45729492 | 0.7034  | 0.5680  | -0.3084 | 0.425911 |
| <i>Lmtk3</i>         | chr7:45783737-45804144 | 0.1060  | 0.0968  | -0.1313 | 0.797706 |
| <i>Ccdc114</i>       | chr7:45924071-45948956 | 0.4601  | 0.5012  | 0.1233  | 0.502584 |
| <i>Kcnc1</i>         | chr7:46396496-46438375 | 0.2708  | 0.1715  | -0.6586 | 0.154234 |
| <i>Tmem86a</i>       | chr7:47050639-47054776 | 1.1614  | 1.2032  | 0.0510  | 0.868531 |
| <i>Ptpn5</i>         | chr7:47077797-47133684 | 0.2749  | 0.6949  | 1.3380  | 0.230341 |
| <i>E2f8</i>          | chr7:48866428-48881596 | 0.2312  | 0.3412  | 0.5616  | 0.325149 |
| <i>A230056P14Rik</i> | chr7:55962530-55980868 | 0.3086  | 0.2408  | -0.3582 | 0.348744 |
| <i>Nipa1</i>         | chr7:55977566-56019954 | 0.2040  | 0.2283  | 0.1618  | 0.747003 |
| <i>Gm6226</i>        | chr7:58836792-58837938 | 0.6214  | 0.4684  | -0.4077 | 0.475208 |
| <i>Trpm1</i>         | chr7:64153834-64269775 | 0.2734  | 0.2036  | -0.4249 | 0.241932 |
| <i>Gm20457</i>       | chr7:64337549-64345964 | 5.7732  | 5.5443  | -0.0584 | 0.765985 |
| <i>Lrrk1</i>         | chr7:66226911-66388350 | 0.1508  | 0.2751  | 0.8670  | 0.062482 |
| <i>Adamts17</i>      | chr7:66839734-67152625 | 0.1389  | 0.1266  | -0.1341 | 0.657607 |
| <i>1700112J16Rik</i> | chr7:67204081-67222458 | 0.1134  | 0.0483  | -1.2320 | 0.368014 |
| <i>Ttc23</i>         | chr7:67647409-67726576 | 0.3268  | 0.3301  | 0.0145  | 0.947484 |
| <i>Pgpep1l</i>       | chr7:68236607-68264233 | 2.9730  | 2.6985  | -0.1398 | 0.566568 |
| <i>Arrdc4</i>        | chr7:68737044-68749241 | 0.4035  | 0.6570  | 0.7035  | 0.055626 |
| <i>Rpl17-ps10</i>    | chr7:72648756-72649311 | 1.1446  | 1.3079  | 0.1924  | 0.666722 |
| <i>Kansl2-ps</i>     | chr7:72672817-72674278 | 0.5804  | 0.5802  | -0.0005 | 0.998871 |

|               |                          |         |         |         |          |
|---------------|--------------------------|---------|---------|---------|----------|
| Gm9885        | chr7:78578829-78581034   | 0.0974  | 0.2226  | 1.1926  | 0.263614 |
| Ticrr         | chr7:79660195-79698134   | 0.1577  | 0.3203  | 1.0224  | 0.017831 |
| Kif7          | chr7:79698098-79714186   | 0.8625  | 0.8564  | -0.0103 | 0.962961 |
| 9330171B17Rik | chr7:79710370-79712357   | 0.6721  | 0.5955  | -0.1747 | 0.640132 |
| Pex11a        | chr7:79735956-79743131   | 0.3151  | 0.4996  | 0.6650  | 0.110181 |
| Gm26646       | chr7:79916951-79920606   | 2.5038  | 2.4235  | -0.0470 | 0.847380 |
| 5430400D12Rik | chr7:79920754-79922521   | 0.4390  | 0.5756  | 0.3909  | 0.321616 |
| Hddc3         | chr7:80343136-80346097   | 4.4710  | 4.6246  | 0.0487  | 0.692371 |
| Fes           | chr7:80377757-80387946   | 0.4780  | 0.9628  | 1.0103  | 0.057722 |
| Gm15880       | chr7:80636016-80644384   | 0.8338  | 0.9407  | 0.1740  | 0.579932 |
| Gm16171       | chr7:80907824-80908148   | 3.8805  | 5.9454  | 0.6155  | 0.209320 |
| Alpk3         | chr7:81057599-81105612   | 0.2520  | 0.3416  | 0.4385  | 0.260551 |
| Mir1839       | chr7:81529854-81529981   | 15.0348 | 12.9545 | -0.2148 | 0.482121 |
| Sh3gl3        | chr7:82173839-82307419   | 0.4487  | 0.7351  | 0.7121  | 0.329116 |
| 4933406J10Rik | chr7:82743367-82755644   | 0.6850  | 1.1430  | 0.7386  | 0.103621 |
| A53002J07Rik  | chr7:83148643-83155922   | 8.1485  | 10.7264 | 0.3966  | 0.130851 |
| Arnt2         | chr7:84246280-84409959   | 0.1534  | 0.4938  | 1.6870  | 0.191704 |
| Fah           | chr7:84585158-84606722   | 1.3265  | 1.1548  | -0.2001 | 0.493246 |
| 2610206C17Rik | chr7:84689639-84776549   | 0.6223  | 0.5203  | -0.2583 | 0.312006 |
| Ankrd42       | chr7:92581722-92637142   | 0.2507  | 0.2984  | 0.2511  | 0.426509 |
| C230038L03Rik | chr7:96947577-96951886   | 0.6754  | 0.5527  | -0.2891 | 0.164307 |
| Gab2          | chr7:97081750-97308940   | 0.1310  | 0.2081  | 0.6684  | 0.131255 |
| Kctd21        | chr7:97332326-97350213   | 1.1602  | 1.4398  | 0.3115  | 0.060564 |
| Rsf1os1       | chr7:97598348-97645112   | 3.3781  | 3.6335  | 0.1052  | 0.859532 |
| Gm9990        | chr7:97720838-97722924   | 1.0662  | 1.3752  | 0.3672  | 0.222752 |
| Aqp11         | chr7:97726378-97738247   | 1.2137  | 1.3180  | 0.1189  | 0.700298 |
| Capn5         | chr7:98121558-98178274   | 0.3300  | 0.3474  | 0.0743  | 0.766380 |
| Gm16938       | chr7:98177193-98185597   | 0.2507  | 0.2711  | 0.1132  | 0.705090 |
| Lrrc32        | chr7:98494221-98501831   | 0.1917  | 0.4487  | 1.2268  | 0.193467 |
| Gm15506       | chr7:98682335-98702928   | 0.9821  | 0.9567  | -0.0377 | 0.827598 |
| Map6          | chr7:99267446-99337137   | 0.2172  | 0.5358  | 1.3024  | 0.088854 |
| Gm4980        | chr7:99624066-99627103   | 0.1960  | 0.2331  | 0.2502  | 0.614595 |
| Xrra1         | chr7:99859217-99917824   | 0.8170  | 0.8209  | 0.0070  | 0.981614 |
| Lipt2         | chr7:100159276-100161365 | 1.3507  | 1.6365  | 0.2769  | 0.272918 |
| NA            | chr7:100545755-100547620 | 0.7929  | 0.8546  | 0.1082  | 0.638856 |
| Gm15673       | chr7:101238340-101239278 | 1.4996  | 1.7913  | 0.2565  | 0.363046 |
| Gm7027        | chr7:101573459-101574321 | 1.4949  | 1.6001  | 0.0981  | 0.824369 |
| Art5          | chr7:102096878-102102845 | 0.7579  | 0.8165  | 0.1075  | 0.449417 |
| Gm24846       | chr7:104264682-104264790 | 16.7415 | 23.8127 | 0.5083  | 0.121052 |
| Gm15133       | chr7:104315018-104324838 | 2.9344  | 4.2888  | 0.5475  | 0.014520 |
| Trim30b       | chr7:104355381-104369884 | 0.2428  | 0.4280  | 0.8179  | 0.018107 |
| Gm16464       | chr7:104501054-104502149 | 1.5348  | 2.1574  | 0.4912  | 0.249214 |
| Gm5901        | chr7:105375097-105378287 | 2.0122  | 1.8150  | -0.1488 | 0.557788 |
| Apbb1         | chr7:105558485-105574402 | 0.6920  | 0.7805  | 0.1736  | 0.709329 |
| Ppfbp2        | chr7:107595050-107748582 | 0.1167  | 0.1164  | -0.0037 | 0.992900 |
| Gm24888       | chr7:109521279-109521409 | 14.5119 | 9.0626  | -0.6792 | 0.107007 |
| Ascl3         | chr7:109727464-109731732 | 1.1661  | 0.9713  | -0.2637 | 0.176226 |
| Wee1          | chr7:110122349-110142112 | 0.8059  | 0.9913  | 0.2988  | 0.406650 |
| NA            | chr7:110766676-110769345 | 0.9420  | 1.0024  | 0.0897  | 0.568876 |
| Mical2        | chr7:112225855-112355194 | 0.1463  | 0.1560  | 0.0928  | 0.813135 |
| Cyp2r1        | chr7:114550165-114562972 | 1.1280  | 1.9211  | 0.7683  | 0.066504 |
| Gm15500       | chr7:114705215-114706235 | 1.2516  | 1.0711  | -0.2246 | 0.431880 |
| Snord14a      | chr7:116333170-116333257 | 29.0860 | 33.4720 | 0.2026  | 0.394457 |
| Gm25683       | chr7:118153479-118153610 | 6.2036  | 6.4770  | 0.0622  | 0.788649 |
| lqck          | chr7:118855759-118972652 | 0.6766  | 0.6273  | -0.1091 | 0.640869 |
| Acsm4         | chr7:119690025-119714567 | 0.2718  | 0.3245  | 0.2558  | 0.667903 |
| NA            | chr7:119739925-119742226 | 0.9422  | 1.1607  | 0.3008  | 0.342361 |
| Pdzd9         | chr7:120659295-120670343 | 1.4822  | 2.0517  | 0.4691  | 0.015196 |
| Gm15774       | chr7:120872691-120875298 | 0.5985  | 0.6433  | 0.1042  | 0.718394 |
| 4933427G17Rik | chr7:120982508-121014787 | 0.4107  | 0.4579  | 0.1568  | 0.605247 |
| Gm15489       | chr7:122139007-122159401 | 1.3750  | 1.5940  | 0.2132  | 0.046252 |
| Plk1          | chr7:122159436-122169875 | 1.1965  | 1.4098  | 0.2366  | 0.296023 |
| Gm17136       | chr7:126176123-126176534 | 2.0230  | 2.7835  | 0.4604  | 0.150523 |
| Cd19          | chr7:126408449-126414870 | 0.2497  | 0.3623  | 0.5370  | 0.515413 |
| Atp2a1        | chr7:126445857-126463108 | 1.0230  | 1.2133  | 0.2461  | 0.392366 |
| Sult1a1       | chr7:126672864-126676432 | 2.7949  | 2.3113  | -0.2741 | 0.405165 |
| Gm6939        | chr7:126687458-126690034 | 2.2085  | 2.7721  | 0.3279  | 0.129961 |
| Gdpd3         | chr7:126766413-126775643 | 2.1016  | 2.5943  | 0.3039  | 0.169681 |
| Gm20650       | chr7:126891621-126897236 | 16.9847 | 17.8144 | 0.0688  | 0.770438 |
| Gm21984       | chr7:126942094-126952873 | 2.5407  | 2.9106  | 0.1961  | 0.495566 |
| Asphd1        | chr7:126945566-126949582 | 0.5833  | 0.6037  | 0.0495  | 0.907094 |

|               |                          |         |         |         |          |
|---------------|--------------------------|---------|---------|---------|----------|
| Sez6l2        | chr7:126950562-126970606 | 1.0043  | 0.8579  | -0.2273 | 0.068368 |
| NA            | chr7:127524696-127524965 | 2.9856  | 3.0659  | 0.0383  | 0.869003 |
| Mir762        | chr7:127708486-127708562 | 19.3506 | 10.3499 | -0.9028 | 0.023533 |
| Prss8         | chr7:127925724-127930113 | 1.3703  | 1.1271  | -0.2818 | 0.335150 |
| Prss36        | chr7:127932637-127946725 | 0.5033  | 0.4168  | -0.2722 | 0.478930 |
| ltgad         | chr7:128154375-128223816 | 0.1875  | 0.2363  | 0.3339  | 0.596384 |
| Tgfb1i1       | chr7:128246811-128253712 | 0.4093  | 0.4299  | 0.0710  | 0.882926 |
| Gm15503       | chr7:128410419-128412341 | 3.1978  | 4.0343  | 0.3352  | 0.314079 |
| Bag3          | chr7:128523582-128546977 | 1.1177  | 1.6441  | 0.5567  | 0.112276 |
| Gm16044       | chr7:128692688-128693138 | 7.0196  | 7.1470  | 0.0259  | 0.914393 |
| Btbd16        | chr7:130774068-130825897 | 0.1810  | 0.2082  | 0.2018  | 0.618308 |
| Lhpp          | chr7:132610637-132706420 | 1.6247  | 1.3541  | -0.2628 | 0.173552 |
| 2510016G02Rik | chr7:132889488-132931375 | 2.0975  | 1.7496  | -0.2617 | 0.093214 |
| Gm15718       | chr7:132979581-132983552 | 2.9051  | 3.6730  | 0.3384  | 0.269614 |
| Ctbp2         | chr7:132987562-133124354 | 0.3415  | 0.3958  | 0.2132  | 0.417618 |
| Mmp21         | chr7:133674269-133680061 | 0.5713  | 0.4696  | -0.2826 | 0.217765 |
| Mgmt          | chr7:136894610-137128187 | 0.6924  | 0.2260  | -1.6153 | 0.051782 |
| Bnip3         | chr7:138890835-138909519 | 1.0924  | 1.1736  | 0.1034  | 0.755405 |
| Stk32c        | chr7:139103637-139213307 | 0.3423  | 0.6836  | 0.9978  | 0.275254 |
| Lrrc27        | chr7:139212987-139242979 | 0.9957  | 0.8745  | -0.1873 | 0.345843 |
| Pwwp2b        | chr7:139248481-139267253 | 0.3855  | 0.3951  | 0.0357  | 0.935527 |
| Nkx6-2        | chr7:139579376-139582797 | 0.5662  | 0.4429  | -0.3542 | 0.169968 |
| Gm2044        | chr7:139957004-139958039 | 1.2206  | 1.2369  | 0.0191  | 0.950925 |
| Fuom          | chr7:140096769-140102441 | 1.2647  | 1.1138  | -0.1834 | 0.115327 |
| Paox          | chr7:140125656-140134334 | 1.4222  | 1.4797  | 0.0572  | 0.695317 |
| Gm15542       | chr7:140890886-140892080 | 2.3940  | 1.8381  | -0.3812 | 0.092502 |
| lfitm6        | chr7:141015811-141016892 | 1.2727  | 1.9187  | 0.5923  | 0.477232 |
| Snora52       | chr7:141448802-141448939 | 27.3884 | 24.0175 | -0.1895 | 0.254467 |
| Gm10575       | chr7:141461480-141467771 | 0.2187  | 0.2647  | 0.2753  | 0.626700 |
| Muc6          | chr7:141633971-141655319 | 0.1221  | 0.1429  | 0.2263  | 0.617568 |
| Muc5b         | chr7:141839071-141873085 | 0.0399  | 0.0727  | 0.8663  | 0.177847 |
| Brsk2         | chr7:141949750-142004247 | 0.5222  | 0.6520  | 0.3203  | 0.452613 |
| lfitm10       | chr7:142325836-142373753 | 0.5560  | 0.7680  | 0.4661  | 0.107020 |
| Tnnt3         | chr7:142498835-142516009 | 2.1921  | 2.6615  | 0.2799  | 0.175995 |
| Ascl2         | chr7:142966821-142969264 | 0.3469  | 0.8770  | 1.3379  | 0.275726 |
| Trpm5         | chr7:143069152-143094642 | 0.2208  | 0.1716  | -0.3635 | 0.072182 |
| Cdkn1c        | chr7:143458349-143461050 | 0.5449  | 0.4488  | -0.2801 | 0.308208 |
| Gm23297       | chr7:143531393-143531520 | 12.3105 | 12.6908 | 0.0439  | 0.901992 |
| Tnfrsf23      | chr7:143665808-143685872 | 0.2764  | 0.2848  | 0.0433  | 0.919844 |
| Mrqpre        | chr7:143778364-143784500 | 0.2409  | 0.5809  | 1.2697  | 0.123332 |
| Cttn          | chr7:144435732-144471009 | 0.4334  | 0.6408  | 0.5639  | 0.263994 |
| Camsap3       | chr8:3587449-3609074     | 0.3625  | 0.4578  | 0.3370  | 0.208130 |
| Gm22204       | chr8:3615528-3615855     | 7.5347  | 8.2143  | 0.1246  | 0.677402 |
| Pcp2          | chr8:3623370-3625545     | 1.8829  | 1.8572  | -0.0198 | 0.935939 |
| Mcemp1        | chr8:3665761-3668905     | 0.5220  | 0.6253  | 0.2605  | 0.639605 |
| Fcer2a        | chr8:3681736-3694174     | 0.6667  | 0.9493  | 0.5098  | 0.287649 |
| Cd209a        | chr8:3743394-3748984     | 0.8538  | 1.3430  | 0.6534  | 0.410822 |
| 4932443L11Rik | chr8:4162521-4206882     | 1.0386  | 0.9834  | -0.0788 | 0.691414 |
| NA            | chr8:4325226-4348790     | 2.1017  | 2.2580  | 0.1034  | 0.469903 |
| Gm7461        | chr8:4677538-4678365     | 0.8998  | 0.7190  | -0.3237 | 0.589460 |
| Shcbp1        | chr8:4735979-4779534     | 0.7227  | 1.1570  | 0.6788  | 0.242716 |
| Gm1840        | chr8:5639583-5640996     | 1.9207  | 1.9444  | 0.0177  | 0.955173 |
| Efnb2         | chr8:8617433-8660773     | 0.1433  | 0.2494  | 0.7996  | 0.152004 |
| 4921522P10Rik | chr8:8661800-8664728     | 0.9965  | 0.9351  | -0.0917 | 0.701802 |
| 9530052E02Rik | chr8:11007849-11054541   | 0.5597  | 0.8801  | 0.6530  | 0.365848 |
| E230013L22Rik | chr8:11477928-11480241   | 1.5264  | 1.5173  | -0.0086 | 0.969629 |
| 4931415C17Rik | chr8:12672185-12679229   | 0.3557  | 0.4547  | 0.3545  | 0.127163 |
| Gm15350       | chr8:12828334-12833865   | 4.6746  | 5.0020  | 0.0977  | 0.631235 |
| Gm15347       | chr8:12860357-12877344   | 3.7545  | 3.9755  | 0.0825  | 0.869304 |
| Gm17023       | chr8:13076076-13082740   | 7.2731  | 7.6910  | 0.0806  | 0.721533 |
| Gm17022       | chr8:13086508-13087430   | 3.4327  | 3.3855  | -0.0200 | 0.917732 |
| Grtp1         | chr8:13176868-13200624   | 0.5094  | 0.7627  | 0.5824  | 0.423840 |
| Gm16725       | chr8:18652800-18678056   | 0.5065  | 0.5390  | 0.0899  | 0.877710 |
| Xkr5          | chr8:18932728-18950975   | 0.1188  | 0.1068  | -0.1534 | 0.815088 |
| Gm26853       | chr8:19789797-19798548   | 0.2718  | 0.3258  | 0.2614  | 0.273910 |
| Gm21769       | chr8:20122364-20126624   | 0.7108  | 0.8216  | 0.2091  | 0.358810 |
| 2610005L07Rik | chr8:20267773-20424814   | 0.2867  | 0.3062  | 0.0951  | 0.705822 |
| Gm26804       | chr8:20292476-20420781   | 1.0361  | 1.2642  | 0.2871  | 0.238099 |
| Gm21182       | chr8:20556694-20557333   | 1.9324  | 1.1413  | -0.7596 | 0.025735 |
| Ckap2         | chr8:22168151-22185819   | 1.0994  | 1.2576  | 0.1940  | 0.636160 |
| Thsd1         | chr8:22227312-22261334   | 0.3837  | 0.3469  | -0.1452 | 0.487681 |

|               |                        |         |         |         |          |
|---------------|------------------------|---------|---------|---------|----------|
| Gm26909       | chr8:22644860-22646286 | 2.2895  | 3.6461  | 0.6713  | 0.051317 |
| Gm15346       | chr8:22686264-22695646 | 1.7828  | 2.4036  | 0.4310  | 0.419618 |
| Plat          | chr8:22757743-22782847 | 1.1735  | 0.7773  | -0.5943 | 0.008116 |
| Gm23184       | chr8:25610427-25610558 | 4.7819  | 3.1989  | -0.5800 | 0.422808 |
| Gm23094       | chr8:25678949-25679271 | 3.8603  | 3.9131  | 0.0196  | 0.950563 |
| 1700047A11Rik | chr8:26082608-26102694 | 3.6249  | 4.6493  | 0.3590  | 0.120863 |
| Zfp703        | chr8:26977335-26981461 | 0.6057  | 0.7524  | 0.3131  | 0.173795 |
| Proscos       | chr8:27042376-27043042 | 0.9753  | 1.1836  | 0.2793  | 0.466485 |
| Gpr124        | chr8:27085582-27123436 | 0.5182  | 0.5619  | 0.1169  | 0.500323 |
| Eij4ebp1      | chr8:27260326-27275656 | 3.8797  | 3.8677  | -0.0044 | 0.986048 |
| Fut10         | chr8:31187330-31261738 | 0.1477  | 0.1998  | 0.4356  | 0.226826 |
| Purg          | chr8:33386324-33417468 | 1.1007  | 1.2822  | 0.2202  | 0.126820 |
| Tex15         | chr8:33516737-33585582 | 0.1471  | 0.2036  | 0.4690  | 0.412598 |
| Gm24727       | chr8:33691800-33691944 | 12.9235 | 12.3783 | -0.0622 | 0.888778 |
| Rbpms         | chr8:33782642-33929863 | 0.8138  | 0.7305  | -0.1558 | 0.360011 |
| Mboat4        | chr8:34115029-34125185 | 1.2708  | 1.1668  | -0.1232 | 0.692261 |
| Lonrf1        | chr8:36216063-36249516 | 0.4076  | 0.4387  | 0.1060  | 0.572912 |
| A1429214      | chr8:36993574-36995531 | 0.3643  | 0.2840  | -0.3596 | 0.188807 |
| Gm16205       | chr8:37787665-37788692 | 0.5549  | 0.4075  | -0.4454 | 0.079978 |
| Fgf20         | chr8:40279165-40308331 | 0.4985  | 0.2829  | -0.8175 | 0.162317 |
| Lrp2bp        | chr8:45999302-46029477 | 0.5142  | 0.6000  | 0.2226  | 0.254238 |
| Wwc2          | chr8:47826082-47990543 | 0.0926  | 0.0795  | -0.2192 | 0.492072 |
| Gm9892        | chr8:52195779-52197160 | 0.8032  | 1.3097  | 0.7054  | 0.037814 |
| Neil3         | chr8:53586866-53639065 | 0.2763  | 0.5660  | 1.0347  | 0.042096 |
| Sap30         | chr8:57482706-57487860 | 2.7536  | 2.7234  | -0.0159 | 0.938437 |
| 2500002B13Rik | chr8:57488053-57508877 | 0.3492  | 0.2694  | -0.3746 | 0.412439 |
| Gm25379       | chr8:57549774-57549888 | 2.9973  | 2.7167  | -0.1418 | 0.873136 |
| B230317F23Rik | chr8:60983436-60985908 | 1.3154  | 1.1991  | -0.1336 | 0.562073 |
| March1        | chr8:65617899-66471637 | 0.1524  | 0.4158  | 1.4477  | 0.010159 |
| Naf1          | chr8:66860216-66890564 | 1.0710  | 0.9903  | -0.1130 | 0.510874 |
| Gm15549       | chr8:68798866-68799488 | 1.8315  | 1.6129  | -0.1833 | 0.637119 |
| Slc18a1       | chr8:69037710-69089235 | 0.2278  | 0.2454  | 0.1076  | 0.655659 |
| Gm15717       | chr8:69110470-69111244 | 3.8566  | 2.6112  | -0.5627 | 0.175184 |
| NA            | chr8:69165744-69184215 | 1.1085  | 0.8923  | -0.3131 | 0.181137 |
| Gm10033       | chr8:69372144-69373383 | 4.4894  | 4.9727  | 0.1475  | 0.403806 |
| Gm10311       | chr8:69373527-69373914 | 3.4010  | 3.6496  | 0.1018  | 0.277007 |
| Pbx4          | chr8:69832623-69873163 | 0.9392  | 0.9886  | 0.0739  | 0.808064 |
| Yjefn3        | chr8:69887787-69902712 | 1.4247  | 1.1942  | -0.2546 | 0.496475 |
| Tm6sf2        | chr8:70072923-70080066 | 0.6633  | 0.4565  | -0.5393 | 0.317593 |
| Mef2b         | chr8:70152777-70167488 | 1.0452  | 0.9590  | -0.1241 | 0.683318 |
| Gdf1          | chr8:70315774-70331592 | 1.3420  | 1.0097  | -0.4105 | 0.192404 |
| Cers1         | chr8:70315786-70331587 | 0.8518  | 0.6346  | -0.4247 | 0.268445 |
| Comp          | chr8:70373547-70382065 | 0.5668  | 0.4855  | -0.2234 | 0.539430 |
| Crif1         | chr8:70493157-70504081 | 0.2696  | 0.3153  | 0.2259  | 0.627586 |
| Pde4c         | chr8:70723719-70751186 | 0.2330  | 0.2342  | 0.0070  | 0.980411 |
| Ankle1        | chr8:71406009-71409904 | 0.6077  | 0.5410  | -0.1676 | 0.777110 |
| Nxn1l         | chr8:71560555-71566649 | 0.8082  | 0.9325  | 0.2064  | 0.215597 |
| NA            | chr8:71674956-71676674 | 0.7250  | 1.1205  | 0.6281  | 0.054862 |
| Calr3         | chr8:72424175-72443870 | 0.6598  | 0.6995  | 0.0844  | 0.692203 |
| Tmem38a       | chr8:72572102-72587282 | 1.4644  | 1.2955  | -0.1768 | 0.374652 |
| Tom1          | chr8:75033685-75070121 | 0.4978  | 0.5509  | 0.1461  | 0.502107 |
| Hmox1         | chr8:75093590-75100596 | 0.3899  | 0.8672  | 1.1532  | 0.020860 |
| Gm5353        | chr8:76862255-76863048 | 3.5230  | 2.5228  | -0.4818 | 0.128477 |
| Nr3c2         | chr8:76899441-77245012 | 0.1935  | 0.2626  | 0.4408  | 0.243076 |
| Gm5909        | chr8:80110805-80112086 | 0.4733  | 0.4690  | -0.0132 | 0.946944 |
| 1700067K01Rik | chr8:84001501-84004770 | 1.2497  | 0.8841  | -0.4994 | 0.140935 |
| Rln3          | chr8:84042928-84045000 | 2.6914  | 2.9918  | 0.1527  | 0.666304 |
| Gm26532       | chr8:84208919-84209609 | 3.6680  | 3.4307  | -0.0965 | 0.719972 |
| Gm26664       | chr8:84665127-84669406 | 2.3381  | 2.6057  | 0.1564  | 0.589363 |
| Lyl1          | chr8:84701456-84704715 | 0.4391  | 0.6331  | 0.5279  | 0.133049 |
| 1700122E12Rik | chr8:84847187-84848415 | 2.1491  | 1.9299  | -0.1552 | 0.657471 |
| Syce2         | chr8:84872110-84888221 | 1.3063  | 1.5359  | 0.2336  | 0.197416 |
| Mast1         | chr8:84911902-84937359 | 0.5483  | 0.5011  | -0.1297 | 0.522983 |
| Gm5741        | chr8:85067567-85067982 | 2.5293  | 2.4746  | -0.0315 | 0.934873 |
| NA            | chr8:85432685-85433315 | 1.1476  | 1.6839  | 0.5532  | 0.039823 |
| Gpt2          | chr8:85492575-85527560 | 0.2081  | 0.2086  | 0.0038  | 0.981128 |
| Gm16167       | chr8:85853372-85854437 | 1.1042  | 1.2803  | 0.2135  | 0.742544 |
| Gm16177       | chr8:86659317-86660035 | 0.7243  | 1.1723  | 0.6947  | 0.344478 |
| Gm10638       | chr8:86745698-86746603 | 2.9266  | 1.7997  | -0.7014 | 0.017681 |
| Gm9988        | chr8:88138078-88138517 | 9.4890  | 7.0481  | -0.4290 | 0.002943 |
| 9430002A10Rik | chr8:88174559-88175028 | 1.8092  | 0.8492  | -1.0912 | 0.119298 |

|                       |                          |         |         |         |          |
|-----------------------|--------------------------|---------|---------|---------|----------|
| <i>Gnao1</i>          | chr8:93809965-93969388   | 0.1654  | 0.1624  | -0.0260 | 0.962542 |
| <i>Gm15890</i>        | chr8:94379236-94386972   | 3.2799  | 2.6132  | -0.3278 | 0.228421 |
| <i>Cpne2</i>          | chr8:94532989-94570529   | 0.3228  | 0.3045  | -0.0844 | 0.873768 |
| <i>Plip</i>           | chr8:94674894-94696242   | 0.6082  | 1.0687  | 0.8133  | 0.065145 |
| <i>Gm7418</i>         | chr8:94835716-94836517   | 1.8461  | 1.7362  | -0.0885 | 0.827434 |
| <i>Kifc3</i>          | chr8:95099831-95142540   | 0.5811  | 0.5328  | -0.1252 | 0.617458 |
| <i>Tepp</i>           | chr8:95310565-95326323   | 2.3685  | 2.7064  | 0.1924  | 0.194741 |
| <i>Mmp15</i>          | chr8:95352267-95374293   | 0.9485  | 0.8373  | -0.1799 | 0.238562 |
| <i>Ndrp4</i>          | chr8:95676979-95715119   | 0.1054  | 0.1656  | 0.6528  | 0.376402 |
| <i>Gm26493</i>        | chr8:95746059-95746195   | 9.5722  | 10.5474 | 0.1400  | 0.593664 |
| <i>Gm26265</i>        | chr8:95756949-95757082   | 6.4962  | 7.7714  | 0.2586  | 0.302846 |
| <i>4930513N10Rik</i>  | chr8:95806829-95821728   | 0.9432  | 0.9940  | 0.0757  | 0.683280 |
| <i>Gm5913</i>         | chr8:97427711-97429110   | 0.8884  | 0.6655  | -0.4168 | 0.164111 |
| <i>Cdh11</i>          | chr8:102632994-102785111 | 0.3509  | 0.4018  | 0.1954  | 0.315579 |
| <i>Car7</i>           | chr8:104534699-104550343 | 0.7761  | 0.8978  | 0.2102  | 0.540002 |
| <i>Ces2c</i>          | chr8:104847067-104854483 | 0.3310  | 0.6528  | 0.9798  | 0.325894 |
| <i>Gm24629</i>        | chr8:105203992-105204081 | 10.1343 | 8.1626  | -0.3121 | 0.430314 |
| <i>Hsf4</i>           | chr8:105269800-105275845 | 0.4249  | 0.4385  | 0.0453  | 0.946674 |
| <i>4931428F04Rik</i>  | chr8:105280409-105289528 | 0.7838  | 0.8470  | 0.1118  | 0.707297 |
| <i>Exoc3l</i>         | chr8:105289923-105296098 | 0.9908  | 0.9058  | -0.1294 | 0.522505 |
| <i>Mir328</i>         | chr8:105308363-105308460 | 8.0667  | 5.7476  | -0.4890 | 0.130601 |
| <i>Zdhhc1</i>         | chr8:105472480-105484350 | 1.6245  | 1.9018  | 0.2273  | 0.240562 |
| <i>Hsd11b2</i>        | chr8:105518745-105523984 | 0.2512  | 0.3030  | 0.2706  | 0.612572 |
| <i>AgRP</i>           | chr8:105566699-105568298 | 1.7694  | 2.0318  | 0.1995  | 0.652994 |
| <i>Gm5915</i>         | chr8:105660333-105660787 | 2.9071  | 2.7004  | -0.1064 | 0.804744 |
| <i>Enkd1</i>          | chr8:105703654-105707933 | 0.9343  | 0.9761  | 0.0631  | 0.842656 |
| <i>Nutf2</i>          | chr8:105860633-105880402 | 1.4470  | 1.3784  | -0.0701 | 0.744884 |
| <i>Ctrl</i>           | chr8:105931993-105933862 | 3.1619  | 3.0805  | -0.0376 | 0.894126 |
| <i>Gm16156</i>        | chr8:105934332-105945843 | 3.0712  | 3.3602  | 0.1297  | 0.654062 |
| <i>Lcat</i>           | chr8:105939550-105943382 | 0.4654  | 0.5601  | 0.2672  | 0.293590 |
| <i>Smpd3</i>          | chr8:106252547-106337988 | 0.3259  | 0.4516  | 0.4706  | 0.037216 |
| <i>Gm10073</i>        | chr8:106572965-106573461 | 6.3924  | 4.1341  | -0.6288 | 0.093467 |
| <i>Cdh1</i>           | chr8:106603350-106670246 | 0.2308  | 0.2368  | 0.0372  | 0.927488 |
| <i>Gm16209</i>        | chr8:107037479-107038106 | 1.9123  | 2.4600  | 0.3633  | 0.508773 |
| <i>Nqo1</i>           | chr8:107388224-107403206 | 0.4770  | 0.3369  | -0.5013 | 0.234869 |
| <i>Snord111</i>       | chr8:110838527-110838616 | 26.0260 | 16.8740 | -0.6252 | 0.174090 |
| <i>Syce1l</i>         | chr8:113643212-113655533 | 1.6741  | 1.7480  | 0.0623  | 0.834980 |
| <i>Cenpn</i>          | chr8:116921739-116941503 | 1.6221  | 1.5245  | -0.0896 | 0.649458 |
| <i>Plcg2</i>          | chr8:117498290-117635140 | 0.4595  | 0.9099  | 0.9857  | 0.001163 |
| <i>Osgin1</i>         | chr8:119434123-119446256 | 0.4120  | 0.8640  | 1.0682  | 0.057623 |
| <i>Rps13-ps4</i>      | chr8:119602169-119602625 | 2.6101  | 1.7403  | -0.5848 | 0.145364 |
| <i>Gm15898</i>        | chr8:120095059-120097736 | 2.0288  | 2.7657  | 0.4470  | 0.241695 |
| <i>6430548M08Rik</i>  | chr8:120114151-120165306 | 0.2512  | 0.2576  | 0.0364  | 0.826503 |
| <i>Gm27021</i>        | chr8:120608785-120668079 | 3.4482  | 3.0547  | -0.1748 | 0.441504 |
| <i>Zcchc14</i>        | chr8:121598702-121652901 | 0.2834  | 0.3205  | 0.1776  | 0.283359 |
| <i>Jph3</i>           | chr8:121729622-121794276 | 0.3510  | 0.4590  | 0.3873  | 0.348951 |
| <i>Gm20406</i>        | chr8:121806414-121807369 | 5.5466  | 4.6584  | -0.2518 | 0.190863 |
| <i>BC048644</i>       | chr8:121907832-121918428 | 0.8447  | 0.9398  | 0.1539  | 0.478475 |
| <i>Gm27011</i>        | chr8:121949673-121950645 | 1.8429  | 2.3481  | 0.3495  | 0.217391 |
| <i>Gm17709</i>        | chr8:121972726-121973822 | 1.4892  | 1.1658  | -0.3532 | 0.344881 |
| <i>Gm20681</i>        | chr8:122374036-122376444 | 0.7704  | 0.7074  | -0.1231 | 0.898392 |
| <i>Il17c</i>          | chr8:122422019-122423639 | 0.8547  | 1.3828  | 0.6941  | 0.153147 |
| <i>Gm24366</i>        | chr8:122471626-122471712 | 9.7516  | 8.0667  | -0.2737 | 0.457970 |
| <i>Cbfa2t3</i>        | chr8:122628738-122699109 | 0.1084  | 0.2319  | 1.0967  | 0.031988 |
| <i>Snord68</i>        | chr8:123103037-123103123 | 15.8840 | 15.6593 | -0.0206 | 0.915622 |
| <i>4933417D19Rik</i>  | chr8:123235090-123242359 | 1.9774  | 2.1041  | 0.0896  | 0.698082 |
| <i>Gm27854</i>        | chr8:123265778-123266005 | 3.4489  | 3.2526  | -0.0845 | 0.685884 |
| <i>Dbnnd1</i>         | chr8:123504717-123515463 | 1.2097  | 1.1882  | -0.0259 | 0.890910 |
| <i>Gm15775</i>        | chr8:124324777-124331795 | 2.9647  | 4.4571  | 0.5882  | 0.136175 |
| <i>Fam89a</i>         | chr8:124740256-124751809 | 1.3503  | 1.8326  | 0.4406  | 0.040293 |
| <i>Disc1</i>          | chr8:125054194-125261858 | 0.1954  | 0.1931  | -0.0169 | 0.977353 |
| <i>Pcnx12</i>         | chr8:125751508-125898293 | 0.2308  | 0.2383  | 0.0459  | 0.829587 |
| <i>Mir1903</i>        | chr8:128359240-128359320 | 6.8271  | 13.7092 | 1.0058  | 0.185301 |
| <i>2610044O15Rik8</i> | chr8:129217723-129221950 | 10.2222 | 11.3198 | 0.1471  | 0.555857 |
| <i>Mmp12</i>          | chr9:7344380-7369499     | 0.1484  | 0.3002  | 1.0165  | 0.053004 |
| <i>Mmp8</i>           | chr9:7558428-7568486     | 0.1607  | 0.0795  | -0.1043 | 0.342365 |
| <i>NA</i>             | chr9:7836686-7837064     | 4.1736  | 4.6760  | 0.1640  | 0.509036 |
| <i>Gm17571</i>        | chr9:13444033-13446753   | 11.0665 | 9.6001  | -0.2051 | 0.527676 |
| <i>Gm22643</i>        | chr9:13621225-13621326   | 19.2356 | 18.5851 | -0.0496 | 0.838245 |
| <i>Kdm4d</i>          | chr9:14462547-14500482   | 0.1526  | 0.2003  | 0.3926  | 0.396853 |
| <i>Gm25500</i>        | chr9:15312551-15312674   | 12.3111 | 13.2719 | 0.1084  | 0.709630 |

|               |                        |         |         |         |          |
|---------------|------------------------|---------|---------|---------|----------|
| Gm24455       | chr9:15313801-15313932 | 13.1921 | 9.4604  | -0.4797 | 0.270447 |
| Gm24299       | chr9:15314073-15314144 | 21.9234 | 27.0492 | 0.3031  | 0.181100 |
| Gm22620       | chr9:15315188-15315321 | 11.0379 | 13.2904 | 0.2679  | 0.333339 |
| Gm24357       | chr9:15315521-15315595 | 40.2357 | 40.2412 | 0.0002  | 0.999251 |
| Gm24339       | chr9:15326463-15326539 | 37.5212 | 51.5051 | 0.4570  | 0.225617 |
| Ccdc67        | chr9:15559863-15627933 | 0.4080  | 0.6722  | 0.7201  | 0.441889 |
| Naalad2       | chr9:18321950-18402995 | 0.4286  | 0.3111  | -0.4620 | 0.137154 |
| Zfp558        | chr9:18455574-18478268 | 0.8351  | 0.7221  | -0.2097 | 0.154152 |
| Fbxl12os      | chr9:20607480-20617271 | 0.8769  | 0.8525  | -0.0407 | 0.822259 |
| Gm26521       | chr9:20607765-20612485 | 0.7454  | 0.8958  | 0.2653  | 0.042431 |
| Olfm2         | chr9:20667985-20728219 | 1.1891  | 1.0281  | -0.2099 | 0.628030 |
| Gm24067       | chr9:20889483-20889568 | 12.6829 | 11.8897 | -0.0932 | 0.813574 |
| Icam4         | chr9:21029372-21030531 | 0.6510  | 0.7841  | 0.2683  | 0.438469 |
| Gm16853       | chr9:21405241-21411720 | 1.8005  | 1.9094  | 0.0847  | 0.723414 |
| Mir199a-1     | chr9:21496494-21496564 | 6.8315  | 8.3910  | 0.2966  | 0.530723 |
| Spc24         | chr9:21755441-21760286 | 1.4542  | 1.6035  | 0.1410  | 0.645503 |
| Dock6         | chr9:21800183-21852635 | 0.1376  | 0.2050  | 0.5751  | 0.225991 |
| Cnn1          | chr9:22099280-22109630 | 0.4889  | 0.4161  | -0.2326 | 0.468585 |
| Anln          | chr9:22331213-22389206 | 0.6385  | 0.8242  | 0.3682  | 0.329145 |
| 9530077C05Rik | chr9:22411576-22444677 | 0.8673  | 1.0788  | 0.3148  | 0.263929 |
| Jam3          | chr9:27097384-27155421 | 0.7379  | 0.6065  | -0.2829 | 0.297837 |
| St14          | chr9:31089401-31131853 | 0.2890  | 0.4334  | 0.5848  | 0.087909 |
| Gm10698       | chr9:33728212-33728889 | 3.1278  | 3.2115  | 0.0381  | 0.812894 |
| Kirrel3       | chr9:34486125-35036716 | 0.4866  | 0.6553  | 0.4294  | 0.265053 |
| Pate2         | chr9:35570283-35690318 | 0.1275  | 0.1129  | -0.1760 | 0.670259 |
| Chek1         | chr9:36708481-36727065 | 0.4841  | 0.5504  | 0.1852  | 0.389902 |
| Gm26787       | chr9:36767886-36782670 | 3.7502  | 4.6380  | 0.3065  | 0.019068 |
| Tmem218       | chr9:37208332-37223210 | 2.2044  | 1.6668  | -0.4033 | 0.206232 |
| Snord14c      | chr9:40803582-40803668 | 43.7289 | 37.0207 | -0.2403 | 0.511671 |
| Mfrp          | chr9:44101737-44109187 | 0.3127  | 0.3492  | 0.1589  | 0.687689 |
| Gm26737       | chr9:44112922-44121947 | 0.3617  | 0.3798  | 0.0702  | 0.876962 |
| Mcam          | chr9:44134468-44142727 | 0.4668  | 0.5522  | 0.2425  | 0.461210 |
| Gm10080       | chr9:44374594-44375209 | 0.8708  | 0.7578  | -0.2006 | 0.589133 |
| C030014I23Rik | chr9:44477923-44482180 | 1.0274  | 0.9874  | -0.0573 | 0.616429 |
| Atp5l         | chr9:44913249-44920742 | 2.6266  | 2.3922  | -0.1349 | 0.456326 |
| Scn2b         | chr9:45117875-45130070 | 0.3207  | 0.3745  | 0.2239  | 0.413316 |
| BC049352      | chr9:45182006-45250020 | 0.2730  | 0.4076  | 0.5782  | 0.152690 |
| Tmprss13      | chr9:45319099-45347581 | 0.7855  | 1.0778  | 0.4563  | 0.425130 |
| Dixdc1        | chr9:50662751-50739517 | 0.2251  | 0.2579  | 0.1965  | 0.379145 |
| Zc3h12c       | chr9:52111984-52168111 | 0.0998  | 0.0966  | -0.0473 | 0.918615 |
| Exph5         | chr9:53301669-53377514 | 0.2774  | 0.3713  | 0.4204  | 0.084625 |
| Kdelc2        | chr9:53384022-53401867 | 0.4131  | 0.6270  | 0.6021  | 0.406133 |
| Hykk          | chr9:54917282-54949924 | 0.1094  | 0.1405  | 0.3606  | 0.294193 |
| Peak1os       | chr9:56257889-56267780 | 0.9682  | 1.1397  | 0.2353  | 0.598843 |
| Gm10658       | chr9:57056629-57071966 | 0.9130  | 0.8077  | -0.1769 | 0.533856 |
| 2700012I20Rik | chr9:57075215-57076013 | 5.3987  | 4.7144  | -0.1955 | 0.377281 |
| Trcg1         | chr9:57236555-57249863 | 0.3653  | 0.5461  | 0.5801  | 0.085171 |
| Lman1l        | chr9:57607084-57620774 | 0.4522  | 0.3914  | -0.2084 | 0.315047 |
| Gm17231       | chr9:57777864-57834295 | 3.3217  | 3.7811  | 0.1869  | 0.258185 |
| Sema7a        | chr9:57940112-57962864 | 0.8564  | 1.0845  | 0.3407  | 0.287588 |
| Rec114        | chr9:58652855-58741559 | 3.1004  | 2.8456  | -0.1237 | 0.483423 |
| Gm7589        | chr9:59145673-59146210 | 0.8019  | 1.2472  | 0.6372  | 0.101376 |
| Rps11-ps1     | chr9:59471758-59472233 | 4.4941  | 6.7305  | 0.5827  | 0.095786 |
| Gm10655       | chr9:61370796-61372193 | 0.9648  | 0.8498  | -0.1831 | 0.687626 |
| Coro2b        | chr9:62419491-62537044 | 0.3480  | 0.5673  | 0.7050  | 0.228098 |
| Gm26609       | chr9:62804477-62808234 | 0.5641  | 1.0942  | 0.9559  | 0.086336 |
| Gm10653       | chr9:62841476-62868000 | 1.9158  | 1.7383  | -0.1403 | 0.711024 |
| Gm22571       | chr9:64175870-64175941 | 23.9778 | 18.3634 | -0.3849 | 0.357101 |
| Gm23136       | chr9:64176660-64176759 | 11.6030 | 8.7961  | -0.3996 | 0.192561 |
| Gm22455       | chr9:64177122-64177193 | 15.3063 | 11.5843 | -0.4020 | 0.182307 |
| Uchl4         | chr9:64235200-64236362 | 2.7352  | 3.2382  | 0.2435  | 0.087728 |
| Gm16218       | chr9:65297531-65297919 | 1.5998  | 1.9775  | 0.3058  | 0.183512 |
| Pif1          | chr9:65587159-65595967 | 0.2568  | 0.4836  | 0.9134  | 0.060099 |
| Gm16073       | chr9:65838166-65838683 | 1.0726  | 1.0797  | 0.0095  | 0.984542 |
| Gm15563       | chr9:66572000-66582059 | 7.0095  | 8.7839  | 0.3255  | 0.195073 |
| Aph1b         | chr9:66775201-66795490 | 0.1400  | 0.2212  | 0.6597  | 0.100797 |
| Gm15511       | chr9:69348888-69364247 | 1.1798  | 1.6120  | 0.4503  | 0.271306 |
| Fam81a        | chr9:70089309-70142560 | 0.1090  | 0.1058  | -0.0439 | 0.956026 |
| Gm3436        | chr9:70852575-70853418 | 0.5541  | 0.3060  | -0.8564 | 0.256102 |
| Aqp9          | chr9:71110658-71168682 | 0.4789  | 0.5510  | 0.2022  | 0.448636 |
| Myzap         | chr9:71504346-71592360 | 0.3284  | 0.3265  | -0.0081 | 0.973470 |

|                      |                          |        |        |         |          |
|----------------------|--------------------------|--------|--------|---------|----------|
| <i>Cpg1os</i>        | chr9:72979723-72985376   | 4.5307 | 3.7659 | -0.2667 | 0.272280 |
| <i>Khd3c</i>         | chr9:73101835-73104443   | 1.1508 | 1.3286 | 0.2073  | 0.388757 |
| <i>Myo5c</i>         | chr9:75232013-75305451   | 0.2625 | 0.3095 | 0.2379  | 0.550800 |
| <i>Gnb5</i>          | chr9:75311394-75344964   | 1.0423 | 0.9260 | -0.1707 | 0.730815 |
| <i>4933433G15Rik</i> | chr9:75410183-75417709   | 2.1936 | 2.0975 | -0.0647 | 0.495100 |
| <i>Gsta4</i>         | chr9:78191965-78209348   | 0.8344 | 1.3708 | 0.7161  | 0.070633 |
| <i>Ddx43</i>         | chr9:78395776-78423587   | 0.6934 | 0.9667 | 0.4793  | 0.071065 |
| <i>Gm8093</i>        | chr9:78427506-78430805   | 0.4152 | 0.4658 | 0.1659  | 0.470616 |
| <i>Gm17324</i>       | chr9:78447864-78448786   | 3.3942 | 2.3482 | -0.5315 | 0.011905 |
| <i>Gm8116</i>        | chr9:78820422-78821892   | 0.6079 | 0.4594 | -0.4040 | 0.380326 |
| <i>4930429F24Rik</i> | chr9:79793640-79803235   | 1.3645 | 1.3036 | -0.0658 | 0.724751 |
| <i>Gm20648</i>       | chr9:80073428-80073756   | 3.5203 | 4.4965 | 0.3531  | 0.128593 |
| <i>Impg1</i>         | chr9:80313329-80465438   | 0.3626 | 0.3352 | -0.1132 | 0.800402 |
| <i>Hmgn3</i>         | chr9:83109947-83146685   | 0.9048 | 1.3981 | 0.6278  | 0.117372 |
| <i>Ttk</i>           | chr9:83834688-83872390   | 0.5046 | 0.6927 | 0.4571  | 0.378274 |
| <i>NA</i>            | chr9:85781862-85782663   | 0.6514 | 0.5221 | -0.3191 | 0.559105 |
| <i>NA</i>            | chr9:86546681-86546795   | 7.7447 | 8.9193 | 0.2037  | 0.549689 |
| <i>Rwdd2a</i>        | chr9:86572052-86574896   | 1.7268 | 1.8192 | 0.0752  | 0.710960 |
| <i>Gm26461</i>       | chr9:88553235-88553534   | 4.5075 | 5.6663 | 0.3301  | 0.611430 |
| <i>Mthfs1</i>        | chr9:88688604-88719798   | 2.8929 | 4.6469 | 0.6837  | 0.021820 |
| <i>Ctsh</i>          | chr9:90054151-90076089   | 0.4035 | 1.0530 | 1.3839  | 0.006418 |
| <i>Adamts7</i>       | chr9:90162977-90208071   | 0.4000 | 0.4531 | 0.1798  | 0.376573 |
| <i>Gm16200</i>       | chr9:90221294-90221625   | 2.4751 | 2.8560 | 0.2065  | 0.572706 |
| <i>Gm5620</i>        | chr9:91097147-91098500   | 0.8341 | 0.6250 | -0.4163 | 0.425536 |
| <i>Plscr1</i>        | chr9:92250056-92271975   | 1.4795 | 2.6165 | 0.8225  | 0.300183 |
| <i>Plod2</i>         | chr9:92542222-92608428   | 0.6094 | 0.7878 | 0.3703  | 0.349559 |
| <i>Gm16262</i>       | chr9:94695703-94702319   | 1.0654 | 1.3907 | 0.3844  | 0.158209 |
| <i>1700065D16Rik</i> | chr9:95855551-95858320   | 1.0331 | 0.7254 | -0.5102 | 0.020621 |
| <i>Gm1123</i>        | chr9:99006964-99035690   | 0.6664 | 0.5202 | -0.3572 | 0.182277 |
| <i>Il20rb</i>        | chr9:100457718-100486788 | 0.6566 | 0.8189 | 0.3185  | 0.128316 |
| <i>Slc35g2</i>       | chr9:100552192-100571085 | 1.7565 | 1.8272 | 0.0570  | 0.778188 |
| <i>Ryk</i>           | chr9:102834916-102908305 | 0.4147 | 0.7244 | 0.8048  | 0.286436 |
| <i>Trf</i>           | chr9:103204000-103230444 | 0.2349 | 0.2412 | 0.0382  | 0.929739 |
| <i>NA</i>            | chr9:104084156-104102560 | 1.4484 | 1.3670 | -0.0835 | 0.509522 |
| <i>Ackr4</i>         | chr9:104098137-104126643 | 0.4562 | 0.5283 | 0.2116  | 0.494052 |
| <i>4930500F10Rik</i> | chr9:106247959-106248907 | 0.5984 | 0.6179 | 0.0463  | 0.938376 |
| <i>Poc1a</i>         | chr9:106281060-106349891 | 1.9241 | 2.0074 | 0.0611  | 0.839751 |
| <i>Gpr62</i>         | chr9:106463972-106465940 | 0.5549 | 0.5123 | -0.1151 | 0.717018 |
| <i>4930524O07Rik</i> | chr9:106892170-106895182 | 1.7382 | 1.7235 | -0.0123 | 0.963708 |
| <i>Dock3</i>         | chr9:106892833-107231909 | 0.1134 | 0.1369 | 0.2713  | 0.417521 |
| <i>Gm17040</i>       | chr9:107292434-107297192 | 0.7217 | 1.2167 | 0.7534  | 0.024493 |
| <i>Cacna2d2</i>      | chr9:107399611-107529346 | 0.1945 | 0.1876 | -0.0518 | 0.916069 |
| <i>Zmynd10</i>       | chr9:107547309-107551319 | 1.3681 | 1.3409 | -0.0290 | 0.914744 |
| <i>Hyal1</i>         | chr9:107576926-107581710 | 0.9241 | 1.1857 | 0.3596  | 0.071563 |
| <i>Hyal3</i>         | chr9:107580817-107587359 | 0.9125 | 0.8035 | -0.1835 | 0.609479 |
| <i>Traip</i>         | chr9:107950962-107972268 | 1.0222 | 1.3478 | 0.3989  | 0.106368 |
| <i>Cdhr4</i>         | chr9:107983286-107999684 | 1.0767 | 1.0474 | -0.0398 | 0.872260 |
| <i>Bsn</i>           | chr9:108096022-108190384 | 0.1894 | 0.2589 | 0.4510  | 0.268381 |
| <i>Nicn1</i>         | chr9:108290447-108296498 | 1.4091 | 1.1488 | -0.2947 | 0.325854 |
| <i>1700102P08Rik</i> | chr9:108392833-108397763 | 3.1102 | 2.3846 | -0.3833 | 0.268681 |
| <i>Klhdc8b</i>       | chr9:108447657-108452377 | 0.8845 | 0.7747 | -0.1913 | 0.505903 |
| <i>Lamb2</i>         | chr9:108479861-108490530 | 0.2290 | 0.2171 | -0.0769 | 0.870711 |
| <i>NA</i>            | chr9:108648839-108650953 | 1.3997 | 1.3970 | -0.0027 | 0.992285 |
| <i>Celsr3</i>        | chr9:108826319-108852963 | 0.1222 | 0.0823 | -0.5693 | 0.066782 |
| <i>Col7a1</i>        | chr9:108953585-108984875 | 0.3293 | 0.2493 | -0.4018 | 0.324853 |
| <i>3000002C10Rik</i> | chr9:109827942-109832706 | 0.6640 | 0.8844 | 0.4136  | 0.000071 |
| <i>Camp</i>          | chr9:109847374-109849456 | 1.0014 | 1.0048 | 0.0049  | 0.992137 |
| <i>Cspg5</i>         | chr9:110243782-110262575 | 0.1598 | 0.3526 | 1.1420  | 0.022605 |
| <i>Ngp</i>           | chr9:110419749-110423010 | 1.1036 | 0.9744 | -0.1796 | 0.826773 |
| <i>Kif9</i>          | chr9:110476993-110525179 | 0.2194 | 0.2072 | -0.0821 | 0.800913 |
| <i>Nradd</i>         | chr9:110621136-110624393 | 2.2243 | 1.7279 | -0.3643 | 0.340032 |
| <i>Prss50</i>        | chr9:110857966-110864628 | 0.5346 | 0.4285 | -0.3190 | 0.370677 |
| <i>Gm590</i>         | chr9:110914738-110916861 | 7.0099 | 4.5597 | -0.6205 | 0.096924 |
| <i>Tdgf1</i>         | chr9:110939609-110946158 | 0.5625 | 0.5460 | -0.0429 | 0.897240 |
| <i>Ltf</i>           | chr9:111019291-111042766 | 1.0553 | 0.7198 | -0.5519 | 0.611540 |
| <i>Ccrl2</i>         | chr9:111054834-111057270 | 0.5314 | 0.8435 | 0.6666  | 0.048999 |
| <i>Arpp21</i>        | chr9:112065090-112235938 | 0.0622 | 0.0537 | -0.2111 | 0.498557 |
| <i>4930520O04Rik</i> | chr9:114368302-114377229 | 0.5108 | 0.8351 | 0.7093  | 0.009616 |
| <i>Ctdspl</i>        | chr9:118926452-119043998 | 0.1776 | 0.1998 | 0.1700  | 0.468986 |
| <i>Scn11a</i>        | chr9:119753762-119825456 | 0.3720 | 0.4223 | 0.1830  | 0.501721 |
| <i>Cx3cr1</i>        | chr9:119901615-120068283 | 0.4278 | 0.6791 | 0.6668  | 0.419400 |

|                      |                          |         |         |         |          |
|----------------------|--------------------------|---------|---------|---------|----------|
| <i>Ccr8</i>          | chr9:120092132-120094906 | 2.2515  | 2.8096  | 0.3195  | 0.286348 |
| <i>Snora62</i>       | chr9:120130414-120130563 | 13.7176 | 11.3709 | -0.2707 | 0.022203 |
| <i>Entpd3</i>        | chr9:120539817-120568318 | 0.1891  | 0.1838  | -0.0417 | 0.913367 |
| <i>5830454E08Rik</i> | chr9:120577345-120578072 | 5.6870  | 4.2551  | -0.4185 | 0.031658 |
| <i>E530011L22Rik</i> | chr9:121757206-121759788 | 1.1262  | 1.3438  | 0.2549  | 0.642681 |
| <i>1700048O20Rik</i> | chr9:121938134-121947014 | 0.3602  | 0.3950  | 0.1328  | 0.392511 |
| <i>A730085K08Rik</i> | chr9:122380574-122398801 | 1.0858  | 1.3487  | 0.3128  | 0.325362 |
| <i>Cdcp1</i>         | chr9:123170823-123216038 | 0.1315  | 0.2452  | 0.8988  | 0.005432 |
| <i>Tmem158</i>       | chr9:123259057-123260789 | 0.6046  | 0.5712  | -0.0820 | 0.857865 |
| <i>Scp2-ps2</i>      | chr9:123307507-123307939 | 5.4242  | 5.4393  | 0.0040  | 0.987503 |
| <i>Xcr1</i>          | chr9:123852314-123862029 | 0.1366  | 0.0746  | -0.8726 | 0.037878 |
| <i>Ppp2r3d</i>       | chr9:124422621-124424154 | 6.2858  | 5.4624  | -0.2025 | 0.375151 |
| <i>NA</i>            | chr9:124438995-124440899 | 8.0057  | 8.9741  | 0.1647  | 0.418281 |
| <i>Rpl19-ps12</i>    | chrX:6071221-6071812     | 0.8998  | 0.4483  | -1.0051 | 0.096387 |
| <i>Usp27x</i>        | chrX:7371275-7375830     | 0.2283  | 0.2907  | 0.3485  | 0.266588 |
| <i>2010204K13Rik</i> | chrX:7411816-7445143     | 0.9609  | 0.7000  | -0.4571 | 0.123423 |
| <i>Syp</i>           | chrX:7638470-7653256     | 0.3661  | 0.3832  | 0.0660  | 0.758888 |
| <i>Gm14703</i>       | chrX:7651105-7657258     | 0.3841  | 0.3919  | 0.0289  | 0.913784 |
| <i>Rbm3os</i>        | chrX:8145428-8147964     | 2.5515  | 4.0255  | 0.6578  | 0.077328 |
| <i>B630019K06Rik</i> | chrX:8892381-8894963     | 0.4953  | 0.5183  | 0.0655  | 0.806199 |
| <i>Lancl3</i>        | chrX:9199901-9268085     | 0.5428  | 0.8154  | 0.5872  | 0.320584 |
| <i>Gm5931</i>        | chrX:10660521-10660998   | 5.6480  | 3.9011  | -0.5339 | 0.099031 |
| <i>Gm14493</i>       | chrX:10717472-10718710   | 5.9228  | 5.3364  | -0.1504 | 0.188371 |
| <i>Gm14513</i>       | chrX:11684001-11684124   | 15.0294 | 10.4755 | -0.5208 | 0.278558 |
| <i>Gm4984</i>        | chrX:12651882-12652821   | 0.5854  | 0.5083  | -0.2038 | 0.709532 |
| <i>AA414768</i>      | chrX:12936871-12938128   | 0.8497  | 1.0595  | 0.3184  | 0.372470 |
| <i>Rpl3-ps1</i>      | chrX:13202545-13203838   | 1.0296  | 0.8724  | -0.2390 | 0.290318 |
| <i>Llph-ps2</i>      | chrX:13217922-13218650   | 1.6654  | 1.2144  | -0.4556 | 0.196404 |
| <i>Gm14636</i>       | chrX:19156980-19167241   | 0.1310  | 0.1926  | 0.5556  | 0.183743 |
| <i>Gm9085</i>        | chrX:20382749-20383821   | 0.6078  | 0.8841  | 0.5406  | 0.049636 |
| <i>Gm5124</i>        | chrX:21360864-21364622   | 0.5120  | 0.5448  | 0.0896  | 0.640337 |
| <i>Gm26593</i>       | chrX:21360864-21364622   | 0.7126  | 0.7251  | 0.0251  | 0.907748 |
| <i>Gm2223</i>        | chrX:33505651-33507010   | 0.7149  | 1.0572  | 0.5644  | 0.118082 |
| <i>Il13ra1</i>       | chrX:36112109-36171259   | 0.3839  | 0.6455  | 0.7497  | 0.147267 |
| <i>Zcchc12</i>       | chrX:36195903-36199158   | 0.5355  | 0.8278  | 0.6283  | 0.016133 |
| <i>Gm6023</i>        | chrX:36213523-36214129   | 0.8573  | 0.6258  | -0.4541 | 0.356555 |
| <i>Gm15008</i>       | chrX:36910833-36911985   | 1.8063  | 3.2224  | 0.8352  | 0.005136 |
| <i>Akap14</i>        | chrX:37150697-37168842   | 0.4667  | 0.7082  | 0.6017  | 0.054792 |
| <i>NA</i>            | chrX:42526584-42529330   | 1.2609  | 1.3685  | 0.1181  | 0.571937 |
| <i>Gm4987</i>        | chrX:46455886-46456294   | 6.2418  | 6.1997  | -0.0098 | 0.981783 |
| <i>Apln</i>          | chrX:48025145-48034853   | 0.2761  | 0.3151  | 0.1907  | 0.703102 |
| <i>Xpnp2</i>         | chrX:48108724-48136981   | 0.2417  | 0.2306  | -0.0674 | 0.764105 |
| <i>Gm14719</i>       | chrX:49660959-49661190   | 3.6409  | 2.0883  | -0.8020 | 0.066786 |
| <i>Firre</i>         | chrX:50555743-50635321   | 1.2750  | 1.8119  | 0.5070  | 0.033181 |
| <i>Frmd7</i>         | chrX:50895179-50942710   | 0.4304  | 0.5048  | 0.2300  | 0.518704 |
| <i>Kis2</i>          | chrX:52742562-52744960   | 1.4790  | 1.2145  | -0.2842 | 0.114533 |
| <i>Gm14586</i>       | chrX:52772341-52772749   | 4.2792  | 4.2161  | -0.0214 | 0.940490 |
| <i>C430049B03Rik</i> | chrX:53055045-53057190   | 0.2983  | 0.1984  | -0.5882 | 0.220873 |
| <i>Cxx1c</i>         | chrX:53607921-53609132   | 0.9323  | 1.4082  | 0.5950  | 0.188407 |
| <i>Cxx1a</i>         | chrX:53642487-53643763   | 0.6531  | 0.7214  | 0.1435  | 0.602809 |
| <i>Cxx1b</i>         | chrX:53669177-53670408   | 1.7660  | 2.0722  | 0.2307  | 0.472284 |
| <i>3830403N18Rik</i> | chrX:56136571-56153498   | 0.5904  | 0.0157  | -5.2370 | 0.231533 |
| <i>6330419J24Rik</i> | chrX:56374609-56377799   | 0.2023  | 0.3972  | 0.9735  | 0.122733 |
| <i>Mir5116</i>       | chrX:56587851-56587914   | 12.0167 | 19.5855 | 0.7047  | 0.166999 |
| <i>Gm14718</i>       | chrX:57200642-57204378   | 2.3210  | 2.2471  | -0.0467 | 0.912157 |
| <i>Gm5637</i>        | chrX:60045110-60046229   | 1.8338  | 1.5098  | -0.2805 | 0.416609 |
| <i>Gm14680</i>       | chrX:62775150-62776742   | 0.5934  | 0.5453  | -0.1220 | 0.771771 |
| <i>Gm5391</i>        | chrX:68319637-68320250   | 2.1130  | 1.8453  | -0.1954 | 0.650314 |
| <i>Hmgb3</i>         | chrX:71555917-71560676   | 1.1496  | 1.2680  | 0.1414  | 0.641464 |
| <i>Zfp185</i>        | chrX:72987338-73031543   | 0.1603  | 0.1816  | 0.1801  | 0.653901 |
| <i>Pnck</i>          | chrX:73655993-73660117   | 0.4800  | 0.4913  | 0.0334  | 0.925230 |
| <i>Slc6a8</i>        | chrX:73673149-73682502   | 0.4136  | 0.6407  | 0.6315  | 0.084102 |
| <i>Gm14817</i>       | chrX:73795214-73797616   | 0.9924  | 0.9239  | -0.1032 | 0.741460 |
| <i>Renbp</i>         | chrX:73922120-73930850   | 0.3186  | 0.5483  | 0.7830  | 0.037997 |
| <i>Mir5132</i>       | chrX:74023527-74023598   | 12.3586 | 8.1412  | -0.6022 | 0.127134 |
| <i>Xlr4e-ps</i>      | chrX:74944962-74952044   | 1.8242  | 1.5468  | -0.2380 | 0.612887 |
| <i>F8</i>            | chrX:75172714-75382615   | 0.1490  | 0.1821  | 0.2893  | 0.513196 |
| <i>Rab39b</i>        | chrX:75572045-75578231   | 0.2944  | 0.6396  | 1.1194  | 0.213880 |
| <i>Gm15063</i>       | chrX:75573451-75575268   | 0.4195  | 0.9189  | 1.1314  | 0.133788 |
| <i>Gm5939</i>        | chrX:78855407-78858281   | 0.1614  | 0.1679  | 0.0571  | 0.874852 |
| <i>Gm8806</i>        | chrX:80533744-80535151   | 1.3425  | 1.1035  | -0.2828 | 0.367987 |



|               |                          |         |         |         |          |
|---------------|--------------------------|---------|---------|---------|----------|
| 5430427019Rik | chrX:85870353-85891499   | 0.3243  | 0.4894  | 0.5938  | 0.324133 |
| Gm14780       | chrX:93527572-93530309   | 0.2481  | 0.2547  | 0.0382  | 0.921116 |
| Pcyt1b        | chrX:93654862-93749951   | 0.1643  | 0.2271  | 0.4666  | 0.203423 |
| Maged1        | chrX:94535473-94542143   | 0.5826  | 0.5179  | -0.1699 | 0.679702 |
| Gm7061        | chrX:94772615-94774034   | 1.2380  | 0.8367  | -0.5652 | 0.069019 |
| Gm14830       | chrX:94774977-94775677   | 0.7347  | 0.7858  | 0.0971  | 0.800822 |
| Rpl13-ps5     | chrX:94789716-94790349   | 0.8183  | 0.8778  | 0.1012  | 0.827223 |
| Gm371         | chrX:94997438-94998683   | 1.3187  | 1.3545  | 0.0387  | 0.900194 |
| Arhgef9       | chrX:95048934-95196821   | 0.2611  | 0.2957  | 0.1796  | 0.624146 |
| Zc4h2         | chrX:95639192-95658509   | 1.6228  | 1.6540  | 0.0275  | 0.925260 |
| Gm24718       | chrX:96150836-96150972   | 11.5477 | 15.7492 | 0.4477  | 0.174334 |
| F630028010Rik | chrX:96239941-96243636   | 0.6803  | 1.0232  | 0.5887  | 0.226676 |
| Efnb1         | chrX:99136129-99148991   | 0.5077  | 0.5806  | 0.1937  | 0.604583 |
| Slc7a3        | chrX:101079209-101086020 | 0.2790  | 0.1905  | -0.5504 | 0.221352 |
| Nlgn3         | chrX:101299167-101325963 | 0.0847  | 0.0737  | -0.2007 | 0.594486 |
| Itgb1bp2      | chrX:101449087-101453541 | 1.5817  | 2.0361  | 0.3644  | 0.228546 |
| Nhs12         | chrX:101849384-102092055 | 0.1284  | 0.1478  | 0.2039  | 0.643028 |
| Rgag4         | chrX:102066543-102071304 | 0.1270  | 0.2455  | 0.9511  | 0.201528 |
| Gm6206        | chrX:103162893-103165427 | 1.2794  | 1.3404  | 0.0672  | 0.745087 |
| Chic1         | chrX:103356475-103396092 | 0.2742  | 0.4490  | 0.7113  | 0.200727 |
| Gm6285        | chrX:104947784-104948282 | 1.1151  | 0.9553  | -0.2231 | 0.492525 |
| Gm7117        | chrX:105725127-105725532 | 1.7542  | 1.2885  | -0.4451 | 0.389786 |
| Gm14853       | chrX:105844464-105845013 | 1.0618  | 1.5640  | 0.5588  | 0.064640 |
| Tlr13         | chrX:106143203-106160493 | 0.2129  | 0.4130  | 0.9558  | 0.027333 |
| Gm14857       | chrX:106281911-106285096 | 0.1168  | 0.1222  | 0.0656  | 0.913560 |
| Gm14834       | chrX:107174609-107175494 | 1.3844  | 1.2939  | -0.0975 | 0.713068 |
| Gm9208        | chrX:107279014-107279962 | 1.5940  | 1.8458  | 0.2116  | 0.098616 |
| Hmgn5         | chrX:109004533-109013404 | 0.9722  | 1.7017  | 0.8076  | 0.009017 |
| Gm6377        | chrX:109196755-109200439 | 0.2949  | 0.5847  | 0.9873  | 0.118881 |
| Gm4784        | chrX:109388743-109392165 | 0.4030  | 0.3879  | -0.0552 | 0.887149 |
| Klhl4         | chrX:114474332-114560829 | 0.6070  | 0.8123  | 0.4204  | 0.507911 |
| Gm14984       | chrX:130400956-130402219 | 0.5755  | 0.5338  | -0.1086 | 0.790124 |
| Gm7823        | chrX:133093939-133095562 | 1.8015  | 1.6683  | -0.1108 | 0.517643 |
| Tspan6        | chrX:133891067-133898429 | 0.8078  | 0.8699  | 0.1068  | 0.636945 |
| Tmem35        | chrX:134295224-134305969 | 0.5086  | 0.5282  | 0.0546  | 0.900640 |
| Cenpi         | chrX:134308083-134362639 | 0.3263  | 0.4282  | 0.3919  | 0.285595 |
| Timm8a1       | chrX:134537255-134541865 | 0.6538  | 0.5944  | -0.1374 | 0.743052 |
| Armcx4        | chrX:134686518-134696757 | 0.4004  | 0.5389  | 0.4286  | 0.089519 |
| Armcx1        | chrX:134717962-134721917 | 0.5580  | 0.7170  | 0.3616  | 0.022296 |
| Armcx6        | chrX:134748460-134751417 | 0.7833  | 0.8260  | 0.0765  | 0.845582 |
| Armcx3        | chrX:134756594-134761455 | 0.8066  | 0.9114  | 0.1762  | 0.272494 |
| Gprasp2       | chrX:135839033-135844730 | 0.3133  | 0.5434  | 0.7945  | 0.055836 |
| Arxes2        | chrX:135993819-135995359 | 1.8046  | 1.6761  | -0.1066 | 0.695778 |
| Glra4         | chrX:136757673-136780141 | 0.6313  | 0.6545  | 0.0522  | 0.846259 |
| Tmsb15l       | chrX:136954987-136976869 | 4.6807  | 4.3259  | -0.1137 | 0.535014 |
| Tmsb15b2      | chrX:136955264-136975497 | 6.8518  | 6.3233  | -0.1158 | 0.519255 |
| Tmsb15b1      | chrX:136974021-136976874 | 3.9371  | 3.7462  | -0.0717 | 0.794495 |
| Zcchc18       | chrX:136993154-136998472 | 0.4574  | 0.6292  | 0.4600  | 0.301000 |
| Rnf128        | chrX:139563315-139673145 | 0.3399  | 0.8184  | 1.2676  | 0.164914 |
| Gm15066       | chrX:144285725-144288333 | 0.9116  | 0.9430  | 0.0488  | 0.871372 |
| 3110067C02Rik | chrX:150463725-150466156 | 0.2963  | 0.4115  | 0.4741  | 0.137812 |
| Alas2         | chrX:150547374-150570638 | 0.8199  | 1.3168  | 0.6835  | 0.023417 |
| Pfkfb1        | chrX:150588228-150643878 | 0.8240  | 0.8712  | 0.0804  | 0.678917 |
| Mir3113       | chrX:151859561-151859637 | 19.1389 | 19.6033 | 0.0346  | 0.917430 |
| Ribc1         | chrX:152004581-152016295 | 1.1905  | 1.6124  | 0.4377  | 0.219855 |
| Gm15267       | chrX:152043048-152043512 | 1.1878  | 0.7554  | -0.6530 | 0.274037 |
| Kantr         | chrX:152298499-152327495 | 0.6010  | 1.1184  | 0.8960  | 0.061648 |
| Gm26035       | chrX:152923452-152923760 | 6.1237  | 6.2625  | 0.0323  | 0.928354 |
| Klf8          | chrX:153237465-153396132 | 0.4027  | 0.6064  | 0.5907  | 0.231958 |
| Kctd12b       | chrX:153685153-153696391 | 0.5783  | 0.8259  | 0.5141  | 0.127087 |
| Gm650         | chrX:155304198-155305749 | 0.9117  | 1.0155  | 0.1556  | 0.721716 |
| Gm8606        | chrX:155504036-155504924 | 1.8570  | 1.9921  | 0.1013  | 0.774741 |
| Gm15163       | chrX:157015330-157120545 | 0.3647  | 0.3511  | -0.0549 | 0.876028 |
| Gm15243       | chrX:160527500-160533045 | 4.2598  | 5.5507  | 0.3819  | 0.031464 |
| Cdk15         | chrX:160784307-160994702 | 0.6102  | 0.6703  | 0.1356  | 0.576243 |
| Gm7331        | chrX:162566815-162567309 | 1.7813  | 1.7777  | -0.0029 | 0.993771 |
| Car5b         | chrX:163976821-164027997 | 0.3032  | 0.6718  | 1.1476  | 0.100515 |
| Siah1b        | chrX:164070704-164076493 | 1.2138  | 1.1855  | -0.0341 | 0.891538 |
| Gemin8        | chrX:166170453-166190512 | 0.9957  | 1.4111  | 0.5031  | 0.060963 |
| Gm1720        | chrX:166662024-166689812 | 1.6122  | 1.1240  | -0.5204 | 0.034404 |
| Gm8817        | chrX:167063193-167070380 | 1.6314  | 1.6416  | 0.0091  | 0.975074 |

|                      |                          |         |         |         |          |
|----------------------|--------------------------|---------|---------|---------|----------|
| <i>Gm15232</i>       | chrX:167088092-167102090 | 1.5720  | 1.8510  | 0.2357  | 0.252225 |
| <i>Gm15239</i>       | chrX:167361454-167364421 | 0.8314  | 1.4020  | 0.7539  | 0.250757 |
| <i>G530011006Rik</i> | chrX:169975042-169978917 | 0.6177  | 1.1275  | 0.8683  | 0.130787 |
| <i>Gm15726</i>       | chrX:169979046-169985232 | 2.2832  | 3.9583  | 0.7938  | 0.008161 |
| <i>Ccdc152</i>       | chr15:3280626-3303526    | 1.8766  | 2.2215  | 0.2434  | 0.297141 |
| <i>Gm2093</i>        | chr15:3996038-4015858    | 0.0999  | 0.1217  | 0.2846  | 0.776132 |
| <i>Snord72</i>       | chr15:5118403-5118484    | 30.8325 | 28.2723 | -0.1251 | 0.470736 |
| <i>Gm15938</i>       | chr15:5175084-5185723    | 1.4641  | 1.0976  | -0.4156 | 0.289166 |
| <i>Gm15937</i>       | chr15:5208912-5210147    | 1.0894  | 1.5987  | 0.5534  | 0.077150 |
| <i>Gm7666</i>        | chr15:6653922-6654741    | 1.4919  | 1.6459  | 0.1418  | 0.742271 |
| <i>Ranbp3l</i>       | chr15:8968425-9066551    | 0.3380  | 0.3619  | 0.0989  | 0.779654 |
| <i>Capsl</i>         | chr15:9436027-9466035    | 0.8818  | 1.1435  | 0.3749  | 0.403575 |
| <i>Prlr</i>          | chr15:10177237-10349180  | 0.1151  | 0.1308  | 0.1842  | 0.719182 |
| <i>Gm25713</i>       | chr15:12158332-12158441  | 7.6020  | 5.7568  | -0.4011 | 0.218997 |
| <i>Mir1898</i>       | chr15:12171491-12171574  | 14.3536 | 16.8920 | 0.2349  | 0.421196 |
| <i>Basp1</i>         | chr15:25363284-25413764  | 1.6789  | 1.6594  | -0.0168 | 0.949708 |
| <i>Cmb1</i>          | chr15:31568790-31590119  | 2.7813  | 2.5633  | -0.1178 | 0.254575 |
| <i>Cpq</i>           | chr15:33083128-33594552  | 1.1745  | 1.1123  | -0.0784 | 0.842160 |
| <i>Gm24523</i>       | chr15:34440790-34440922  | 26.2674 | 25.6571 | -0.0339 | 0.879341 |
| <i>Vps13b</i>        | chr15:35371545-35931228  | 27.2438 | 29.4606 | 0.1129  | 0.194805 |
| <i>Polr2k</i>        | chr15:36174009-36177010  | 1.8963  | 2.2301  | 0.2340  | 0.429857 |
| <i>Ncald</i>         | chr15:37366174-37792570  | 0.1210  | 0.1641  | 0.4389  | 0.350602 |
| <i>Gm22392</i>       | chr15:44432594-44432701  | 11.0525 | 7.1651  | -0.6253 | 0.163485 |
| <i>Pkhd11l</i>       | chr15:44457552-44597143  | 0.0770  | 0.1125  | 0.5473  | 0.138415 |
| <i>Dscc1</i>         | chr15:55076098-55090491  | 0.8526  | 0.8416  | -0.0188 | 0.950871 |
| <i>Deptor</i>        | chr15:55112316-55259271  | 0.0678  | 0.0739  | 0.1254  | 0.744909 |
| <i>Gm16006</i>       | chr15:57708113-57708927  | 2.2532  | 3.8958  | 0.7900  | 0.047787 |
| <i>Gm15943</i>       | chr15:58214474-58324053  | 0.8459  | 0.7549  | -0.1643 | 0.617490 |
| <i>Gm20712</i>       | chr15:58780460-58781951  | 0.6963  | 0.7544  | 0.1155  | 0.729925 |
| <i>Gm24041</i>       | chr15:58819322-58819478  | 7.6465  | 9.5087  | 0.3144  | 0.358875 |
| <i>NA</i>            | chr15:62217540-62219403  | 0.3660  | 0.6627  | 0.8564  | 0.257841 |
| <i>Gm20405</i>       | chr15:65857868-65858356  | 5.1129  | 4.7472  | -0.1071 | 0.821242 |
| <i>Lrrc6</i>         | chr15:66379857-66500910  | 0.9638  | 0.7405  | -0.3804 | 0.474489 |
| <i>Tg</i>            | chr15:66670752-66850721  | 0.1753  | 0.2656  | 0.5993  | 0.134446 |
| <i>Gm2895</i>        | chr15:66969322-67013039  | 0.2680  | 0.4314  | 0.6871  | 0.107315 |
| <i>Gm26621</i>       | chr15:68334714-68337430  | 1.2792  | 1.1924  | -0.1014 | 0.707055 |
| <i>Gm20732</i>       | chr15:68340982-68363176  | 1.8801  | 1.8613  | -0.0145 | 0.958738 |
| <i>NA</i>            | chr15:73095843-73096684  | 3.7479  | 4.9042  | 0.3879  | 0.349144 |
| <i>Slurp1</i>        | chr15:74726643-74728026  | 4.6285  | 3.5815  | -0.3700 | 0.266409 |
| <i>Ly6d</i>          | chr15:74762055-74763567  | 0.5676  | 0.7342  | 0.3712  | 0.536957 |
| <i>Ly6k</i>          | chr15:74796873-74799986  | 2.5181  | 1.6367  | -0.6216 | 0.510774 |
| <i>Ly6c2</i>         | chr15:75108159-75111684  | 4.9561  | 4.9589  | 0.0008  | 0.998708 |
| <i>Gm15945</i>       | chr15:75661406-75663529  | 1.2203  | 1.6255  | 0.4136  | 0.100465 |
| <i>Zc3h3</i>         | chr15:75754431-75841915  | 0.6510  | 0.8507  | 0.3859  | 0.208447 |
| <i>Naprt</i>         | chr15:75890963-75894481  | 1.0002  | 0.9775  | -0.0331 | 0.932368 |
| <i>Tigd5</i>         | chr15:75909759-75912148  | 1.5231  | 1.2012  | -0.3426 | 0.053884 |
| <i>Fam83h</i>        | chr15:76001092-76014336  | 0.1537  | 0.1128  | -0.4459 | 0.408966 |
| <i>Nrbp2</i>         | chr15:76085594-76090013  | 0.4028  | 1.4199  | 1.8175  | 0.148921 |
| <i>Rps6-ps1</i>      | chr15:76337615-76338365  | 1.4107  | 1.0847  | -0.3791 | 0.015111 |
| <i>Tssk5</i>         | chr15:76371957-76374938  | 0.3991  | 0.4939  | 0.3075  | 0.424565 |
| <i>Scx</i>           | chr15:76457437-76459468  | 1.0412  | 0.7966  | -0.3863 | 0.061346 |
| <i>Zfp647</i>        | chr15:76910850-76918010  | 1.3093  | 1.1633  | -0.1706 | 0.422130 |
| <i>Apol9b</i>        | chr15:77729120-77736381  | 0.9372  | 1.1627  | 0.3111  | 0.529222 |
| <i>Gm22107</i>       | chr15:77840656-77840756  | 17.8270 | 28.3666 | 0.6701  | 0.004341 |
| <i>Csf2rb</i>        | chr15:78325989-78351000  | 0.2154  | 0.4384  | 1.0251  | 0.055022 |
| <i>Tst</i>           | chr15:78399555-78405859  | 1.0571  | 1.0021  | -0.0772 | 0.877397 |
| <i>Kctd17</i>        | chr15:78428563-78438909  | 1.5163  | 1.8625  | 0.2966  | 0.178925 |
| <i>Card10</i>        | chr15:78775137-78803042  | 0.1040  | 0.1710  | 0.7170  | 0.157904 |
| <i>Gcat</i>          | chr15:79030873-79043558  | 0.9041  | 0.9881  | 0.1283  | 0.549757 |
| <i>Sox10</i>         | chr15:79154912-79164490  | 0.3033  | 0.3877  | 0.3538  | 0.236000 |
| <i>Slc16a8</i>       | chr15:79251013-79254761  | 0.5408  | 0.5706  | 0.0774  | 0.886770 |
| <i>Baiap2l2</i>      | chr15:79258194-79285537  | 0.2836  | 0.1939  | -0.5486 | 0.106697 |
| <i>Maff</i>          | chr15:79347540-79359072  | 1.7354  | 1.9516  | 0.1694  | 0.613454 |
| <i>Kdelr3</i>        | chr15:79516407-79527739  | 1.9506  | 2.2383  | 0.1985  | 0.586472 |
| <i>n-R5s40</i>       | chr15:79692501-79692625  | 3.1738  | 4.4544  | 0.4890  | 0.408955 |
| <i>Pdgfb</i>         | chr15:79995899-80014808  | 0.1763  | 0.2990  | 0.7621  | 0.106879 |
| <i>Snord83b</i>      | chr15:80078497-80078591  | 16.5844 | 25.7721 | 0.6360  | 0.076143 |
| <i>Gm22077</i>       | chr15:80080250-80080343  | 35.1441 | 32.7474 | -0.1019 | 0.700342 |
| <i>Syng1</i>         | chr15:80091333-80119501  | 0.1088  | 0.0966  | -0.1711 | 0.837336 |
| <i>Mir5113</i>       | chr15:80940038-80940120  | 25.0551 | 34.1225 | 0.4456  | 0.053059 |
| <i>Dnajb7</i>        | chr15:81407087-81408273  | 1.0253  | 1.0370  | 0.0163  | 0.959080 |

|                      |                           |         |         |         |          |
|----------------------|---------------------------|---------|---------|---------|----------|
| <i>Gm23880</i>       | chr15:81586132-81586186   | 16.0159 | 7.6574  | -1.0646 | 0.087821 |
| <i>Gm18284</i>       | chr15:81674254-81674878   | 1.3557  | 1.5383  | 0.1823  | 0.743708 |
| <i>Csdc2</i>         | chr15:81936758-81950941   | 0.0629  | 0.0516  | -0.2845 | 0.744103 |
| <i>Tnfrsf13c</i>     | chr15:82221743-82224339   | 0.2997  | 0.4032  | 0.4283  | 0.206327 |
| <i>Cenpm</i>         | chr15:82233778-82244747   | 0.5100  | 0.6988  | 0.4543  | 0.477993 |
| <i>Nfam1</i>         | chr15:82997720-83033306   | 0.7921  | 1.3118  | 0.7278  | 0.079812 |
| <i>Gm17206</i>       | chr15:83102071-83105929   | 3.4750  | 4.7140  | 0.4399  | 0.049767 |
| <i>Rnu12</i>         | chr15:83149643-83149794   | 5.1909  | 5.3740  | 0.0500  | 0.917778 |
| <i>1700001L05Rik</i> | chr15:83357525-83367282   | 0.3991  | 0.5257  | 0.3974  | 0.277769 |
| <i>Bik</i>           | chr15:83526861-83544635   | 1.2617  | 0.9182  | -0.4584 | 0.337748 |
| <i>Phf21b</i>        | chr15:84785380-84856049   | 0.2806  | 0.3190  | 0.1851  | 0.365900 |
| <i>Fbln1</i>         | chr15:85205948-85286535   | 0.2546  | 0.2472  | -0.0426 | 0.900325 |
| <i>Gtse1</i>         | chr15:85859706-85876572   | 1.2950  | 1.4578  | 0.1708  | 0.487760 |
| <i>Mapk12</i>        | chr15:89130584-89140703   | 0.9338  | 0.8710  | -0.1003 | 0.679590 |
| <i>Plxb2</i>         | chr15:89155548-89171120   | 0.2430  | 0.3970  | 0.7080  | 0.098063 |
| <i>Gm26798</i>       | chr15:89211558-89215012   | 0.9285  | 1.2028  | 0.3734  | 0.075291 |
| <i>Cpt1b</i>         | chr15:89416404-89425863   | 1.1823  | 0.9685  | -0.2878 | 0.001366 |
| <i>Tcea1-ps1</i>     | chr15:90882614-90883518   | 4.0335  | 3.8243  | -0.0768 | 0.628705 |
| <i>Gm24447</i>       | chr15:93234362-93234700   | 4.5346  | 4.3419  | -0.0627 | 0.747061 |
| <i>Gm17546</i>       | chr15:95824458-95830072   | 0.8592  | 1.5128  | 0.8162  | 0.087967 |
| <i>Gm25397</i>       | chr15:96404857-96404949   | 18.2197 | 16.8091 | -0.1163 | 0.721729 |
| <i>Endou</i>         | chr15:97711018-97731405   | 0.2311  | 0.2007  | -0.2029 | 0.587264 |
| <i>Vdr</i>           | chr15:97854424-97910630   | 0.1509  | 0.4953  | 1.7144  | 0.158432 |
| <i>Gm26513</i>       | chr15:98093282-98095771   | 1.0183  | 1.1059  | 0.1191  | 0.663836 |
| <i>Snora34</i>       | chr15:98519715-98519853   | 8.5561  | 7.0372  | -0.2819 | 0.577091 |
| <i>Rnd1</i>          | chr15:98663420-98677461   | 0.2133  | 0.2393  | 0.1660  | 0.758083 |
| <i>Gm17349</i>       | chr15:99702175-99705490   | 6.7230  | 6.1220  | -0.1351 | 0.688400 |
| <i>Gm17058</i>       | chr15:99765990-99782332   | 1.1464  | 1.5045  | 0.3922  | 0.241457 |
| <i>5330439K02Rik</i> | chr15:100459739-100468691 | 1.0887  | 0.8210  | -0.4071 | 0.310173 |
| <i>C330013E15Rik</i> | chr15:100614139-100615110 | 1.5746  | 1.5310  | -0.0405 | 0.889296 |
| <i>A330009N23Rik</i> | chr15:101221195-101224121 | 0.5845  | 0.3194  | -0.8718 | 0.033935 |
| <i>5430421N21Rik</i> | chr15:101485130-101491512 | 0.2232  | 0.2225  | -0.0048 | 0.993962 |
| <i>Tenc1</i>         | chr15:102102987-102116401 | 0.6004  | 0.6578  | 0.1319  | 0.524478 |
| <i>Esp1</i>          | chr15:102296292-102324356 | 0.4345  | 0.5492  | 0.3380  | 0.339240 |
| <i>Gm10337</i>       | chr15:102503721-102503886 | 4.2998  | 4.4866  | 0.0614  | 0.884988 |
| <i>Npff</i>          | chr15:102523842-102524621 | 5.7619  | 5.8215  | 0.0149  | 0.951940 |
| <i>NA</i>            | chr15:102528635-102529025 | 5.0982  | 4.6981  | -0.1179 | 0.659713 |
| <i>Rpl39-ps</i>      | chr15:102634981-102635336 | 4.9552  | 5.6650  | 0.1931  | 0.643052 |
| <i>Atp5g2</i>        | chr15:102663013-102667749 | 2.4009  | 2.8264  | 0.2354  | 0.389602 |
| <i>Nfe2</i>          | chr15:103248211-103258403 | 0.4448  | 0.5251  | 0.2393  | 0.552952 |
| <i>Gm3636</i>        | chr14:6735684-6875155     | 0.4869  | 0.4169  | -0.2239 | 0.665062 |
| <i>Gm10044</i>       | chr14:7744062-7791651     | 0.6139  | 0.8879  | 0.5323  | 0.095223 |
| <i>Gm16741</i>       | chr14:7749944-7775528     | 1.4849  | 1.7727  | 0.2556  | 0.428909 |
| <i>Dnase1l3</i>      | chr14:7964532-7994573     | 0.1837  | 0.3971  | 1.1126  | 0.012465 |
| <i>Fhit</i>          | chr14:9550091-11162035    | 0.5856  | 0.5991  | 0.0329  | 0.946985 |
| <i>Rpl21-ps4</i>     | chr14:11227551-11227992   | 2.0477  | 2.1161  | 0.0474  | 0.868647 |
| <i>Il3ra</i>         | chr14:14346494-14355490   | 2.5029  | 3.1845  | 0.3475  | 0.212341 |
| <i>Ube2e2</i>        | chr14:18573574-18894267   | 0.2711  | 0.3967  | 0.5491  | 0.105325 |
| <i>Nid2</i>          | chr14:19751256-19811787   | 0.1973  | 0.2930  | 0.5704  | 0.118417 |
| <i>Kcnk5</i>         | chr14:20140057-20181782   | 0.7850  | 1.1668  | 0.5718  | 0.477290 |
| <i>Gm6158</i>        | chr14:24070073-24070637   | 1.2889  | 1.1901  | -0.1151 | 0.824516 |
| <i>Gm26660</i>       | chr14:25355800-25378635   | 0.4002  | 0.4912  | 0.2954  | 0.387925 |
| <i>Gm26772</i>       | chr14:25548389-25554369   | 0.5179  | 0.6264  | 0.2745  | 0.289117 |
| <i>4933413J09Rik</i> | chr14:26356573-26400456   | 0.1393  | 0.1959  | 0.4915  | 0.072656 |
| <i>4930570N19Rik</i> | chr14:26628406-26638183   | 6.4181  | 6.3077  | -0.0250 | 0.900506 |
| <i>9930004E17Rik</i> | chr14:26670009-26670507   | 1.5580  | 1.8613  | 0.2566  | 0.510118 |
| <i>Dnah12</i>        | chr14:26693273-26891703   | 0.0784  | 0.0476  | -0.7220 | 0.007628 |
| <i>Asb14</i>         | chr14:26894556-26915258   | 0.3484  | 0.4504  | 0.3704  | 0.429306 |
| <i>Gm22485</i>       | chr14:27489268-27489377   | 7.8365  | 6.4734  | -0.2757 | 0.581990 |
| <i>Mir3076</i>       | chr14:30572148-30572208   | 25.0734 | 18.3464 | -0.4507 | 0.215989 |
| <i>Mustn1</i>        | chr14:30879256-30881608   | 1.7594  | 1.9678  | 0.1615  | 0.493779 |
| <i>Snord69</i>       | chr14:31014286-31014366   | 13.3503 | 13.1257 | -0.0245 | 0.952933 |
| <i>Snord19</i>       | chr14:31016205-31016281   | 30.0866 | 30.2320 | 0.0070  | 0.978811 |
| <i>Stab1</i>         | chr14:31139012-31168641   | 0.0488  | 0.0229  | -1.0948 | 0.105553 |
| <i>Dnah1</i>         | chr14:31260374-31323896   | 0.1260  | 0.1946  | 0.6270  | 0.026400 |
| <i>Colq</i>          | chr14:31523081-31591343   | 0.6772  | 0.6811  | 0.0082  | 0.969167 |
| <i>Gm7707</i>        | chr14:32266592-32267748   | 2.3627  | 2.0089  | -0.2341 | 0.122432 |
| <i>Gm17210</i>       | chr14:32292923-32294974   | 2.9869  | 4.0944  | 0.4550  | 0.084660 |
| <i>Syt15</i>         | chr14:34219594-34230421   | 0.1653  | 0.1648  | -0.0051 | 0.986248 |
| <i>Bmpr1a</i>        | chr14:34410733-34503341   | 0.2935  | 0.1573  | -0.9003 | 0.025056 |
| <i>Sh2d4b</i>        | chr14:40813788-40893266   | 0.7209  | 0.6942  | -0.0545 | 0.809226 |

|                |                         |         |         |         |          |
|----------------|-------------------------|---------|---------|---------|----------|
| Gm16976        | chr14:44858670-44974944 | 0.3464  | 0.6013  | 0.7956  | 0.070806 |
| 4930431P03Rik  | chr14:44955216-44961307 | 0.6495  | 1.1832  | 0.8652  | 0.044799 |
| Gm17173        | chr14:44972267-45006900 | 0.8129  | 1.3384  | 0.7194  | 0.011331 |
| Gm15765        | chr14:45211522-45212432 | 1.1027  | 1.0923  | -0.0137 | 0.970512 |
| Gpr137c        | chr14:45219718-45281230 | 0.4891  | 0.3779  | -0.3724 | 0.343194 |
| Styx           | chr14:45351472-45373585 | 1.7195  | 1.9929  | 0.2129  | 0.397248 |
| Cdkn3          | chr14:46760540-46771525 | 1.8046  | 2.3584  | 0.3861  | 0.088657 |
| Gm6055         | chr14:48079135-48079806 | 1.7041  | 2.1634  | 0.3443  | 0.282588 |
| Tlr11          | chr14:50360501-50363662 | 0.1456  | 0.2407  | 0.7254  | 0.174376 |
| Rnase6         | chr14:51129067-51131122 | 0.6773  | 1.6665  | 1.2990  | 0.141742 |
| Slc39a2        | chr14:51892888-51896745 | 1.1378  | 0.8594  | -0.4048 | 0.166141 |
| Arhgef40       | chr14:51984718-52006251 | 0.1689  | 0.1662  | -0.0235 | 0.904425 |
| Tmem253        | chr14:52016864-52019787 | 1.8189  | 1.7559  | -0.0509 | 0.737949 |
| Trav2          | chr14:52567292-52568051 | 1.4058  | 1.6435  | 0.2254  | 0.670081 |
| Trav3-1        | chr14:52580706-52581213 | 1.8002  | 2.0598  | 0.1944  | 0.654323 |
| Trav5-1        | chr14:52622565-52623082 | 4.2557  | 5.3551  | 0.3315  | 0.419424 |
| Trav6-1        | chr14:52638514-52638962 | 2.9059  | 2.9808  | 0.0367  | 0.905252 |
| Trav6-2        | chr14:52667410-52667864 | 1.9772  | 2.7456  | 0.4737  | 0.149381 |
| Trav6d-4       | chr14:52753366-52753844 | 4.3896  | 4.3202  | -0.0230 | 0.913943 |
| Trav6d-5       | chr14:52795027-52795631 | 2.9783  | 2.4059  | -0.3079 | 0.091997 |
| Trav8d-2       | chr14:53042427-53042891 | 2.2056  | 2.7450  | 0.3156  | 0.537770 |
| Trav13d-4      | chr14:53073003-53073267 | 2.5470  | 2.4417  | -0.0609 | 0.927756 |
| Trav10n        | chr14:53122113-53122610 | 3.4614  | 4.8135  | 0.4758  | 0.269802 |
| Trav6n-6       | chr14:53132850-53133137 | 4.3893  | 6.3726  | 0.5379  | 0.279108 |
| Trav8n-2       | chr14:53345960-53346420 | 4.2966  | 4.1172  | -0.0615 | 0.746004 |
| Trav16n        | chr14:53351089-53351621 | 4.7030  | 7.1351  | 0.6013  | 0.025971 |
| Trav13n-4      | chr14:53363835-53364102 | 4.3390  | 4.2632  | -0.0254 | 0.944778 |
| Trav4-2        | chr14:53418348-53418872 | 2.9395  | 2.7186  | -0.1127 | 0.827916 |
| Trav7-3        | chr14:53443248-53443838 | 1.8779  | 2.3108  | 0.2992  | 0.435356 |
| Trav6-4        | chr14:53454295-53454782 | 3.6323  | 3.5600  | -0.0290 | 0.936569 |
| Trav7-4        | chr14:53461098-53461736 | 4.2984  | 3.8404  | -0.1626 | 0.574461 |
| Trav8-1        | chr14:53469755-53470231 | 3.9588  | 5.1218  | 0.3716  | 0.312984 |
| Trav9-1        | chr14:53488044-53488566 | 3.8973  | 3.4433  | -0.1787 | 0.412172 |
| Trav10         | chr14:53505789-53506286 | 6.2358  | 6.7719  | 0.1190  | 0.385154 |
| Trav12-1       | chr14:53538259-53538738 | 4.0592  | 4.0565  | -0.0010 | 0.996740 |
| Trav13-1       | chr14:53545013-53545521 | 11.5785 | 7.4910  | -0.6282 | 0.023828 |
| Trav9-2        | chr14:53591079-53591514 | 7.8854  | 6.7775  | -0.2184 | 0.411347 |
| Trav4-3        | chr14:53598907-53599410 | 6.8601  | 6.7222  | -0.0293 | 0.937261 |
| Trav12-2       | chr14:53616314-53616912 | 9.3796  | 8.9793  | -0.0629 | 0.776686 |
| Trav12-3       | chr14:53621656-53622243 | 5.4521  | 6.0401  | 0.1478  | 0.457108 |
| Trav13-2       | chr14:53634828-53635398 | 6.7816  | 5.7779  | -0.2311 | 0.464224 |
| Trav15-2-dv6-2 | chr14:53649386-53649993 | 2.4149  | 2.0871  | -0.2105 | 0.496767 |
| Trav3-3        | chr14:53665928-53666505 | 5.9132  | 6.3259  | 0.0973  | 0.658090 |
| Trav9-4        | chr14:53676140-53676629 | 5.4962  | 6.1015  | 0.1507  | 0.553029 |
| Trav5-4        | chr14:53704006-53704513 | 6.8059  | 5.3979  | -0.3344 | 0.151327 |
| Trav6-7-dv9    | chr14:53709901-53710417 | 4.1305  | 5.6563  | 0.4536  | 0.108021 |
| Trav7-6        | chr14:53716715-53717290 | 4.5856  | 4.6764  | 0.0283  | 0.943625 |
| Trav16         | chr14:53743103-53743706 | 6.9071  | 5.4307  | -0.3469 | 0.100263 |
| Trav13-4-dv7   | chr14:53757355-53757920 | 2.8505  | 2.6351  | -0.1134 | 0.748762 |
| Trav3-4        | chr14:53776955-53777575 | 1.2016  | 1.2442  | 0.0502  | 0.880868 |
| B230359F08Rik  | chr14:53795359-53797832 | 1.5477  | 1.3639  | -0.1823 | 0.296532 |
| Trav17         | chr14:53806524-53807113 | 5.8532  | 4.8534  | -0.2702 | 0.226228 |
| Trav19         | chr14:53845233-53845826 | 7.2529  | 6.9012  | -0.0717 | 0.745597 |
| Trav21-dv12    | chr14:53875983-53876751 | 10.1819 | 9.6106  | -0.0833 | 0.813624 |
| Trdv1          | chr14:53881531-53882216 | 3.9923  | 5.6300  | 0.4959  | 0.426612 |
| Trdv2-2        | chr14:53960992-53961599 | 5.5383  | 4.2900  | -0.3685 | 0.144427 |
| Traj58         | chr14:54157279-54157342 | 15.9435 | 13.7735 | -0.2111 | 0.642672 |
| Traj57         | chr14:54158504-54158569 | 16.7326 | 14.2990 | -0.2267 | 0.527520 |
| Traj56         | chr14:54159262-54159325 | 20.6352 | 15.9217 | -0.3741 | 0.291555 |
| Traj55         | chr14:54161438-54161501 | 7.3745  | 7.6567  | 0.0542  | 0.920397 |
| Traj54         | chr14:54161989-54162043 | 13.3205 | 10.1189 | -0.3966 | 0.609424 |
| Traj53         | chr14:54162643-54162709 | 22.5292 | 15.6939 | -0.5216 | 0.101643 |
| Traj52         | chr14:54165315-54165381 | 25.5352 | 22.9674 | -0.1529 | 0.694231 |
| Traj51         | chr14:54166238-54166281 | 28.2231 | 26.2141 | -0.1065 | 0.842558 |
| Traj50         | chr14:54167589-54167652 | 13.7933 | 11.9890 | -0.2022 | 0.566798 |
| Traj49         | chr14:54168685-54168744 | 14.8032 | 9.2581  | -0.6771 | 0.214877 |
| Traj48         | chr14:54169808-54169868 | 33.1333 | 39.0100 | 0.2356  | 0.122822 |
| Traj46         | chr14:54172335-54172398 | 18.4106 | 13.9907 | -0.3961 | 0.419185 |
| Traj45         | chr14:54172827-54172890 | 19.4482 | 14.8118 | -0.3929 | 0.338450 |
| Traj44         | chr14:54173689-54173750 | 34.6402 | 32.8714 | -0.0756 | 0.831104 |
| Traj43         | chr14:54174741-54174798 | 52.0583 | 35.3806 | -0.5572 | 0.015224 |

|               |                           |         |         |         |          |
|---------------|---------------------------|---------|---------|---------|----------|
| Traj42        | chr14:54175772-54175836   | 32.0766 | 26.7113 | -0.2641 | 0.405348 |
| Traj41        | chr14:54176270-54176325   | 23.1276 | 24.5428 | 0.0857  | 0.659179 |
| Traj40        | chr14:54177920-54177981   | 52.4956 | 50.7833 | -0.0478 | 0.673383 |
| Traj38        | chr14:54180573-54180635   | 29.6124 | 27.5587 | -0.1037 | 0.695671 |
| Traj36        | chr14:54182401-54182464   | 53.0900 | 61.4313 | 0.2105  | 0.413203 |
| Traj35        | chr14:54183773-54183838   | 38.2021 | 32.8285 | -0.2187 | 0.399615 |
| Traj33        | chr14:54185357-54185414   | 49.8281 | 48.6307 | -0.0351 | 0.832901 |
| Traj32        | chr14:54186100-54186166   | 47.5757 | 51.0295 | 0.1011  | 0.602358 |
| Traj30        | chr14:54189865-54189924   | 33.4378 | 41.6129 | 0.3156  | 0.335011 |
| Traj26        | chr14:54194489-54194549   | 53.3773 | 75.7535 | 0.5051  | 0.028871 |
| Traj25        | chr14:54194814-54194871   | 45.1452 | 58.3248 | 0.3695  | 0.025957 |
| Traj20        | chr14:54199440-54199498   | 40.4391 | 52.8076 | 0.3850  | 0.225737 |
| Traj16        | chr14:54203133-54203194   | 53.8125 | 77.1300 | 0.5194  | 0.092033 |
| Traj13        | chr14:54205740-54205797   | 35.3805 | 51.5291 | 0.5424  | 0.217767 |
| Traj8         | chr14:54209917-54209954   | 56.4235 | 47.8893 | -0.2366 | 0.484263 |
| Traj5         | chr14:54213776-54213838   | 28.1286 | 32.7953 | 0.2215  | 0.553867 |
| Traj4         | chr14:54216290-54216353   | 49.6463 | 53.2419 | 0.1009  | 0.590047 |
| Traj1         | chr14:54218813-54218840   | 56.4536 | 83.3820 | 0.5627  | 0.122959 |
| Slc7a7        | chr14:54369443-54409472   | 1.3307  | 1.5599  | 0.2293  | 0.146170 |
| Mmp14         | chr14:54431603-54441258   | 0.3591  | 0.3670  | 0.0311  | 0.947869 |
| Ajuba         | chr14:54567468-54577661   | 0.3160  | 0.1782  | -0.8268 | 0.138836 |
| Gm20726       | chr14:54632328-54632781   | 4.1147  | 3.9929  | -0.0433 | 0.841685 |
| Ppp1r3e       | chr14:54872668-54877550   | 1.1402  | 1.4378  | 0.3345  | 0.096416 |
| Slc22a17      | chr14:54906726-54913132   | 0.3816  | 0.5579  | 0.5480  | 0.063879 |
| Rec8          | chr14:55618036-55625395   | 0.9451  | 1.3937  | 0.5604  | 0.119599 |
| Cideb         | chr14:55754044-55758458   | 2.3928  | 2.8712  | 0.2629  | 0.324079 |
| Gzmc          | chr14:56231400-56234656   | 1.1302  | 1.0128  | -0.1581 | 0.412539 |
| Gzmb          | chr14:56258855-56262260   | 1.7999  | 2.8401  | 0.6580  | 0.442744 |
| C030013D06Rik | chr14:56733656-56734954   | 1.7798  | 2.5716  | 0.5309  | 0.039876 |
| Gjb2          | chr14:57098599-57104702   | 0.1870  | 0.2389  | 0.3536  | 0.630091 |
| Ift88os       | chr14:57506743-57510835   | 0.3018  | 0.2554  | -0.2406 | 0.563635 |
| Ska3          | chr14:57806560-57826163   | 1.4499  | 1.3069  | -0.1498 | 0.623895 |
| Gm22738       | chr14:57831062-57831209   | 5.7467  | 4.9459  | -0.2165 | 0.558863 |
| 3110083C13Rik | chr14:57999322-58003695   | 0.6382  | 0.5467  | -0.2234 | 0.679544 |
| Phf11d        | chr14:59347406-59365470   | 0.3973  | 0.5695  | 0.5192  | 0.074093 |
| Gm16301       | chr14:59414071-59414636   | 1.3859  | 2.2538  | 0.7015  | 0.200727 |
| Atp8a2        | chr14:59647530-60197179   | 0.3394  | 0.4369  | 0.3642  | 0.359163 |
| Kcnrg         | chr14:61607481-61611916   | 1.9814  | 2.2936  | 0.2111  | 0.680645 |
| Gm27010       | chr14:61625925-61627337   | 4.3121  | 4.0510  | -0.0901 | 0.804471 |
| Gm26916       | chr14:61629483-61630414   | 4.3532  | 4.2867  | -0.0222 | 0.950702 |
| Gm27017       | chr14:61648949-61667312   | 4.4856  | 4.8940  | 0.1257  | 0.570450 |
| 4931440J10Rik | chr14:62760500-62830126   | 3.6342  | 3.0963  | -0.2311 | 0.050999 |
| Gm26536       | chr14:62836907-62838207   | 1.4299  | 1.1719  | -0.2871 | 0.383692 |
| Neil2         | chr14:63182442-63193541   | 0.9581  | 1.1206  | 0.2261  | 0.393064 |
| Xkr6          | chr14:63606502-63820809   | 0.1393  | 0.2146  | 0.6240  | 0.373968 |
| Esco2         | chr14:65819037-65833994   | 0.7108  | 1.0898  | 0.6166  | 0.202498 |
| Gm5464        | chr14:66868849-66871005   | 1.5310  | 1.6369  | 0.0964  | 0.620744 |
| Gnrh1         | chr14:67745228-67749435   | 2.5311  | 2.4107  | -0.0703 | 0.715059 |
| Tnfrsf10b     | chr14:69767471-69784403   | 0.9427  | 0.9547  | 0.0182  | 0.948284 |
| Sorbs3        | chr14:70180467-70207637   | 0.2336  | 0.2450  | 0.0686  | 0.879867 |
| Gm26908       | chr14:70205323-70217659   | 0.7836  | 1.0125  | 0.3697  | 0.077185 |
| Piwil2        | chr14:70372479-70429094   | 0.2165  | 0.2869  | 0.4060  | 0.268369 |
| Gm16549       | chr14:72589751-72603367   | 4.7775  | 4.8333  | 0.0167  | 0.958816 |
| Cysltr2       | chr14:73029127-73049114   | 1.2963  | 2.4145  | 0.8973  | 0.152721 |
| Nudt15        | chr14:73519863-73548242   | 0.5753  | 0.6353  | 0.1431  | 0.611301 |
| Gm16409       | chr14:73796540-73797290   | 2.5664  | 1.8855  | -0.4447 | 0.013274 |
| 5031414D18Rik | chr14:75016026-75052532   | 0.2850  | 0.5108  | 0.8417  | 0.052890 |
| Siah3         | chr14:75455981-75526141   | 0.5482  | 0.6453  | 0.2353  | 0.629763 |
| Gm4285        | chr14:75843378-75844964   | 3.9735  | 4.5713  | 0.2022  | 0.459078 |
| Snora31       | chr14:75847904-75848034   | 29.7390 | 27.7322 | -0.1008 | 0.695900 |
| Ccdc122       | chr14:77036771-77112257   | 0.1884  | 0.3035  | 0.6878  | 0.276427 |
| Scel          | chr14:103513340-103613346 | 0.0883  | 0.1058  | 0.2615  | 0.792388 |
| Gm22877       | chr14:103650452-103650557 | 34.7967 | 21.7713 | -0.6765 | 0.035625 |
| Gm16259       | chr14:105292431-105292984 | 1.9176  | 2.6692  | 0.4771  | 0.185307 |
| Mir92-1       | chr14:115044426-115044506 | 4.5183  | 6.5890  | 0.5443  | 0.443921 |
| Cldn10        | chr14:118787870-118875489 | 1.2673  | 1.3232  | 0.0623  | 0.721584 |
| Uggt2         | chr14:118985038-119099430 | 0.1707  | 0.2150  | 0.3328  | 0.099512 |
| Slc15a1       | chr14:121459620-121505254 | 0.6855  | 0.4321  | -0.6657 | 0.011250 |
| Gm17082       | chr14:122121552-122122643 | 0.9642  | 0.9798  | 0.0232  | 0.966281 |
| Gm10232       | chr17:3043883-3044750     | 1.3376  | 1.2336  | -0.1168 | 0.484219 |
| Gm15599       | chr17:5110780-5112119     | 1.4537  | 1.6526  | 0.1850  | 0.531394 |

|               |                         |         |         |         |          |
|---------------|-------------------------|---------|---------|---------|----------|
| Zdhhc14       | chr17:5492599-5753891   | 1.1327  | 0.9712  | -0.2219 | 0.370261 |
| Gm5812        | chr17:6121207-6122164   | 2.1724  | 1.6249  | -0.4190 | 0.059584 |
| Dynlt1a       | chr17:6310546-6317474   | 0.9845  | 0.8142  | -0.2740 | 0.422984 |
| Tmem181b-ps   | chr17:6448039-6449571   | 1.0423  | 0.6534  | -0.6737 | 0.058764 |
| NA            | chr17:6451887-6477102   | 5.6066  | 3.9198  | -0.5164 | 0.052567 |
| Dynlt1c       | chr17:6601670-6609774   | 0.5676  | 0.4390  | -0.3706 | 0.153676 |
| Dynlt1f       | chr17:6648940-6655939   | 5.0685  | 4.2703  | -0.2472 | 0.274809 |
| Rsph3b        | chr17:6904715-6948356   | 0.8476  | 0.7155  | -0.2445 | 0.439365 |
| Rnaset2b      | chr17:6978859-7011299   | 0.8377  | 0.8503  | 0.0216  | 0.937940 |
| Rsph3a        | chr17:7945652-7979824   | 0.8558  | 1.1196  | 0.3876  | 0.221005 |
| Rnaset2a      | chr17:8128609-8148097   | 2.9310  | 2.9057  | -0.0125 | 0.956149 |
| 4930506C21Rik | chr17:8293365-8311080   | 1.7624  | 1.6694  | -0.0782 | 0.740909 |
| Gm16702       | chr17:8379044-8389468   | 0.6712  | 1.0926  | 0.7030  | 0.290793 |
| 4732491K20Rik | chr17:12318884-12327250 | 0.4318  | 0.2969  | -0.5402 | 0.078829 |
| Gm16574       | chr17:12818792-12819537 | 0.8654  | 0.9573  | 0.1457  | 0.762212 |
| Gm7162        | chr17:12819818-12820842 | 0.6585  | 0.9342  | 0.5046  | 0.275093 |
| Gm26130       | chr17:12919584-12919722 | 23.7764 | 29.7939 | 0.3255  | 0.054358 |
| Snora20       | chr17:12922789-12922917 | 9.6751  | 10.4758 | 0.1147  | 0.335453 |
| Mllt4         | chr17:13760538-13906150 | 0.4577  | 0.3025  | -0.5977 | 0.055063 |
| NA            | chr17:14978863-14991577 | 0.7361  | 0.8581  | 0.2211  | 0.298601 |
| Spaca6        | chr17:17830718-17843009 | 0.5295  | 0.5913  | 0.1591  | 0.417567 |
| Gm7535        | chr17:17911038-17911947 | 1.2734  | 1.0989  | -0.2126 | 0.415784 |
| Gm26753       | chr17:21485176-21488875 | 0.5379  | 0.8582  | 0.6740  | 0.149753 |
| 9330136K24Rik | chr17:21528193-21535878 | 0.8582  | 0.8502  | -0.0135 | 0.964018 |
| Gm10509       | chr17:21690765-21691024 | 4.6887  | 5.8691  | 0.3239  | 0.437607 |
| Gm10226       | chr17:21691859-21692114 | 11.0186 | 12.7438 | 0.2098  | 0.455988 |
| Zfp229        | chr17:21730794-21769342 | 0.4533  | 0.3853  | -0.2347 | 0.418129 |
| Zfp820        | chr17:21816875-21845759 | 0.2798  | 0.2659  | -0.0740 | 0.820456 |
| Gm7805        | chr17:21964135-21964583 | 3.1982  | 3.4515  | 0.1100  | 0.718884 |
| Zfp947        | chr17:22144358-22166190 | 0.4936  | 0.4536  | -0.1219 | 0.791239 |
| Zscan10       | chr17:23600855-23611019 | 1.3461  | 0.9281  | -0.5365 | 0.015028 |
| Ccdc64b       | chr17:23660522-23668610 | 0.3640  | 0.3174  | -0.1977 | 0.707335 |
| Tnfrsf12a     | chr17:23675446-23677449 | 3.0443  | 3.5034  | 0.2026  | 0.212769 |
| Kremen2       | chr17:23741199-23745829 | 1.0586  | 1.1347  | 0.1001  | 0.604265 |
| D930048G16Rik | chr17:23790703-23794241 | 1.7239  | 1.8681  | 0.1159  | 0.650883 |
| Mir5125       | chr17:23823290-23823369 | 18.3522 | 24.2533 | 0.4022  | 0.132517 |
| Tbc1d24       | chr17:24175430-24205562 | 0.2617  | 0.2885  | 0.1409  | 0.416659 |
| Caskin1       | chr17:24488782-24508905 | 0.5159  | 0.5320  | 0.0443  | 0.747753 |
| Rab26         | chr17:24527240-24534210 | 1.1141  | 1.4694  | 0.3993  | 0.072285 |
| Nthl1         | chr17:24632681-24638838 | 2.1268  | 2.3598  | 0.1500  | 0.469136 |
| Noxo1         | chr17:24696233-24700529 | 1.2243  | 1.3530  | 0.1442  | 0.416663 |
| Snhg9         | chr17:24719530-24719965 | 4.7104  | 3.6320  | -0.3751 | 0.479615 |
| Snora64       | chr17:24720771-24720905 | 19.5180 | 18.3688 | -0.0875 | 0.776294 |
| Rpl3l         | chr17:24727819-24736143 | 0.3178  | 0.4666  | 0.5539  | 0.392398 |
| Igfals        | chr17:24878769-24882008 | 0.5593  | 0.6524  | 0.2220  | 0.648448 |
| Tmem204       | chr17:25057701-25081181 | 0.5766  | 0.6319  | 0.1321  | 0.728565 |
| Gng13         | chr17:25717170-25719406 | 0.7678  | 1.0701  | 0.4789  | 0.258211 |
| Fam195a       | chr17:25863697-25868738 | 1.7661  | 1.7292  | -0.0304 | 0.921861 |
| 1700022N22Rik | chr17:25985814-25988469 | 1.2862  | 1.7930  | 0.4793  | 0.320920 |
| Pdia2         | chr17:26195998-26199087 | 0.7256  | 0.8508  | 0.2297  | 0.484741 |
| Arhgdig       | chr17:26196225-26207786 | 0.7562  | 0.9119  | 0.2702  | 0.037895 |
| Gm16580       | chr17:26269335-26270379 | 3.1153  | 2.3734  | -0.3924 | 0.078243 |
| Hba-ps4       | chr17:26286362-26287061 | 3.6083  | 3.3494  | -0.1074 | 0.649176 |
| Neurl1b       | chr17:26414828-26446349 | 0.1528  | 0.2334  | 0.6116  | 0.339094 |
| Rps2-ps9      | chr17:27784426-27785243 | 1.8314  | 2.0632  | 0.1720  | 0.518823 |
| Tead3         | chr17:28331670-28350805 | 0.1620  | 0.2037  | 0.3304  | 0.187892 |
| Gm20109       | chr17:28522380-28523148 | 2.8504  | 1.9967  | -0.5135 | 0.130768 |
| Slc26a8       | chr17:28637782-28689987 | 0.0937  | 0.1289  | 0.4603  | 0.324852 |
| 4930539E08Rik | chr17:28896396-28915324 | 0.7731  | 0.6546  | -0.2400 | 0.261569 |
| Gm23887       | chr17:28989976-28990148 | 7.7112  | 11.1888 | 0.5370  | 0.005369 |
| Cpne5         | chr17:29156549-29237797 | 0.1141  | 0.0868  | -0.3951 | 0.055651 |
| Fgd2          | chr17:29360913-29379660 | 0.3948  | 0.6330  | 0.6812  | 0.203488 |
| 4833413E03Rik | chr17:31557125-31559113 | 0.8122  | 1.0429  | 0.3607  | 0.201443 |
| NA            | chr17:32285106-32285177 | 10.3319 | 9.7637  | -0.0816 | 0.815638 |
| Zfp870        | chr17:32879227-32886083 | 0.3377  | 0.7039  | 1.0596  | 0.100951 |
| Cyp4f41-ps    | chr17:32950960-32965700 | 0.4916  | 0.3056  | -0.6860 | 0.160705 |
| Zfp422-rs1    | chr17:33293836-33305745 | 5.4436  | 5.4184  | -0.0067 | 0.956988 |
| Angptl4       | chr17:33773749-33781575 | 0.9530  | 0.7851  | -0.2795 | 0.358624 |
| BC033916      | chr17:33905134-33906675 | 3.4107  | 5.2311  | 0.6170  | 0.391492 |
| Mir219a-1     | chr17:34024982-34025092 | 5.5556  | 3.0393  | -0.8702 | 0.072815 |
| BC051537      | chr17:34083842-34095309 | 1.4835  | 1.5750  | 0.0864  | 0.767784 |

|                      |                         |         |         |         |          |
|----------------------|-------------------------|---------|---------|---------|----------|
| <i>H2-DMb2</i>       | chr17:34143306-34151553 | 1.4202  | 2.2293  | 0.6505  | 0.021967 |
| <i>H2-DMb1</i>       | chr17:34153071-34160223 | 0.6376  | 1.2873  | 1.0137  | 0.020201 |
| <i>Gm20506</i>       | chr17:34249056-34250264 | 1.4824  | 1.7378  | 0.2293  | 0.494325 |
| <i>H2-Eb2</i>        | chr17:34325664-34340229 | 0.6665  | 1.3160  | 0.9815  | 0.272785 |
| <i>Btnl2</i>         | chr17:34354821-34369493 | 0.2077  | 0.1591  | -0.3845 | 0.422676 |
| <i>Btnl7-ps</i>      | chr17:34532876-34547651 | 1.3318  | 1.6725  | 0.3286  | 0.284434 |
| <i>Prrt1</i>         | chr17:34629532-34633126 | 0.8125  | 0.7293  | -0.1558 | 0.690774 |
| <i>C4a</i>           | chr17:34809091-34823464 | 0.1863  | 0.1993  | 0.0967  | 0.730459 |
| <i>Cfb</i>           | chr17:34856373-34862518 | 0.6300  | 0.6087  | -0.0498 | 0.881519 |
| <i>Gm20547</i>       | chr17:34856411-34882042 | 0.5285  | 0.5185  | -0.0277 | 0.939992 |
| <i>C2</i>            | chr17:34856411-34898265 | 0.5050  | 0.4814  | -0.0689 | 0.820574 |
| <i>Zbtb12</i>        | chr17:34879482-34896842 | 1.5088  | 1.5941  | 0.0793  | 0.704434 |
| <i>Hspa1l</i>        | chr17:34972702-34979284 | 1.3646  | 0.9722  | -0.4891 | 0.160466 |
| <i>Gm10501</i>       | chr17:34976898-34981788 | 1.7533  | 1.3320  | -0.3965 | 0.203244 |
| <i>Vwa7</i>          | chr17:35016578-35026741 | 0.0874  | 0.1241  | 0.5062  | 0.194444 |
| <i>Msh5</i>          | chr17:35028604-35046745 | 0.4512  | 0.4912  | 0.1224  | 0.590341 |
| <i>Ddah2</i>         | chr17:35059034-35062095 | 0.5781  | 0.9286  | 0.6837  | 0.034773 |
| <i>Ly6g5b</i>        | chr17:35113947-35115428 | 1.3751  | 1.2513  | -0.1362 | 0.536491 |
| <i>Apom</i>          | chr17:35128996-35132050 | 2.6117  | 2.8411  | 0.1214  | 0.454564 |
| <i>Gm23442</i>       | chr17:35162562-35162696 | 9.1979  | 13.2826 | 0.5302  | 0.027419 |
| <i>Gm17705</i>       | chr17:35165118-35167186 | 1.6025  | 1.4715  | -0.1231 | 0.749185 |
| <i>Lst1</i>          | chr17:35185094-35188439 | 4.9740  | 5.1027  | 0.0369  | 0.878006 |
| <i>Gm16181</i>       | chr17:35220833-35224134 | 3.6332  | 2.5981  | -0.4838 | 0.033639 |
| <i>Gm22589</i>       | chr17:35242677-35242754 | 16.6122 | 14.9636 | -0.1508 | 0.573892 |
| <i>Gm25128</i>       | chr17:35247174-35247250 | 20.1037 | 20.0748 | -0.0021 | 0.994623 |
| <i>H2-Q2</i>         | chr17:35342241-35346762 | 1.7340  | 1.7987  | 0.0528  | 0.861383 |
| <i>H2-Q10</i>        | chr17:35470088-35474563 | 0.6497  | 0.7159  | 0.1400  | 0.847071 |
| <i>Gm4577</i>        | chr17:35703895-35708244 | 0.8764  | 1.3752  | 0.6500  | 0.151346 |
| <i>Ppp1r18os</i>     | chr17:35860917-35866886 | 3.2935  | 3.3881  | 0.0409  | 0.692877 |
| <i>Mir877</i>        | chr17:35960729-35960814 | 8.3304  | 8.8585  | 0.0887  | 0.683154 |
| <i>Gm7030</i>        | chr17:36109718-36129425 | 2.3317  | 2.3261  | -0.0035 | 0.987355 |
| <i>BC023719</i>      | chr17:36111425-36117121 | 3.4396  | 3.4559  | 0.0068  | 0.961193 |
| <i>Gm9574</i>        | chr17:36137187-36139105 | 2.0792  | 2.1575  | 0.0533  | 0.809732 |
| <i>Gm8909</i>        | chr17:36164442-36168537 | 1.4109  | 2.0476  | 0.5374  | 0.097881 |
| <i>Trim15</i>        | chr17:36860692-36867210 | 0.9114  | 1.2510  | 0.4569  | 0.067841 |
| <i>Rnf39</i>         | chr17:36942917-36947986 | 2.0978  | 2.1136  | 0.0108  | 0.955668 |
| <i>Olfr755-ps1</i>   | chr17:37276647-37278105 | 3.9123  | 4.4959  | 0.2006  | 0.353378 |
| <i>Olfr756-ps1</i>   | chr17:37285141-37286069 | 1.1846  | 1.7345  | 0.5501  | 0.181755 |
| <i>Cyp39a1</i>       | chr17:43667424-43751431 | 0.3488  | 0.3263  | -0.0961 | 0.810260 |
| <i>Clic5</i>         | chr17:44188571-44280168 | 0.2633  | 0.3173  | 0.2690  | 0.442463 |
| <i>Runx2</i>         | chr17:44495986-44814797 | 0.3190  | 0.4994  | 0.6466  | 0.182212 |
| <i>Gm16172</i>       | chr17:45663518-45666209 | 5.0118  | 5.2306  | 0.0617  | 0.671280 |
| <i>Vegfa</i>         | chr17:46016992-46032377 | 0.3849  | 0.4942  | 0.3605  | 0.129271 |
| <i>Gm26785</i>       | chr17:46273478-46280060 | 0.6141  | 0.8604  | 0.4866  | 0.048805 |
| <i>Gm5093</i>        | chr17:46439577-46440099 | 0.9537  | 0.6388  | -0.5780 | 0.340529 |
| <i>Ttbk1</i>         | chr17:46442447-46487675 | 0.0957  | 0.3005  | 1.6511  | 0.151570 |
| <i>Gnmt</i>          | chr17:46725663-46729168 | 0.5983  | 0.5732  | -0.0617 | 0.926290 |
| <i>A330017A19Rik</i> | chr17:46889215-46890405 | 0.9095  | 1.2502  | 0.4589  | 0.235313 |
| <i>Gm23657</i>       | chr17:46992622-46992916 | 4.1149  | 3.9751  | -0.0499 | 0.887979 |
| <i>Guca1b</i>        | chr17:47385392-47392967 | 1.4859  | 1.1438  | -0.3774 | 0.226629 |
| <i>Tomm6os</i>       | chr17:47687609-47691083 | 0.9632  | 1.0571  | 0.1341  | 0.554624 |
| <i>Frs3</i>          | chr17:47689029-47704286 | 0.5704  | 0.5029  | -0.1815 | 0.365368 |
| <i>Gm15556</i>       | chr17:47922377-47923429 | 1.1911  | 1.7417  | 0.5481  | 0.052499 |
| <i>Gm20540</i>       | chr17:49427937-49429240 | 1.7008  | 2.1803  | 0.3584  | 0.004686 |
| <i>Pp2d1</i>         | chr17:53507459-53539451 | 0.6169  | 0.8374  | 0.4408  | 0.236477 |
| <i>Gm16712</i>       | chr17:55954770-55959381 | 0.7616  | 0.8642  | 0.1823  | 0.589572 |
| <i>Gm16276</i>       | chr17:56014282-56014544 | 5.6167  | 4.5723  | -0.2968 | 0.544426 |
| <i>Plin4</i>         | chr17:56100590-56109802 | 0.4079  | 0.4235  | 0.0540  | 0.834064 |
| <i>Plin5</i>         | chr17:56111600-56117596 | 0.2536  | 0.2820  | 0.1532  | 0.793426 |
| <i>Catsperd</i>      | chr17:56628142-56664456 | 0.5401  | 0.6926  | 0.3589  | 0.375450 |
| <i>Prr22</i>         | chr17:56770275-56772134 | 0.5403  | 0.5731  | 0.0851  | 0.817886 |
| <i>Rfx2</i>          | chr17:56775896-56831008 | 0.8117  | 0.7963  | -0.0277 | 0.892240 |
| <i>Pspn</i>          | chr17:56999456-57000018 | 1.9430  | 1.8781  | -0.0490 | 0.923773 |
| <i>Crb3</i>          | chr17:57059104-57065918 | 0.7210  | 0.6783  | -0.0882 | 0.687717 |
| <i>Tnfsf9</i>        | chr17:57105384-57107757 | 1.0977  | 1.2980  | 0.2418  | 0.570343 |
| <i>C3</i>            | chr17:57203969-57228136 | 0.2836  | 0.3108  | 0.1320  | 0.859416 |
| <i>Trip10</i>        | chr17:57249450-57263697 | 0.8306  | 0.8257  | -0.0085 | 0.964964 |
| <i>Emr1</i>          | chr17:57358685-57483529 | 0.5139  | 0.8431  | 0.7142  | 0.240629 |
| <i>4930405O22Rik</i> | chr17:63305445-63312973 | 1.5060  | 2.2728  | 0.5937  | 0.236630 |
| <i>Gm17133</i>       | chr17:64748849-64754096 | 8.6377  | 10.4710 | 0.2777  | 0.392329 |
| <i>Myom1</i>         | chr17:71019520-71126856 | 0.3377  | 0.3176  | -0.0887 | 0.812588 |

|                      |                         |         |         |         |          |
|----------------------|-------------------------|---------|---------|---------|----------|
| <i>Spdya</i>         | chr17:71552060-71589533 | 1.1330  | 1.1720  | 0.0488  | 0.832087 |
| <i>Snord53</i>       | chr17:71640878-71640956 | 31.8439 | 34.2564 | 0.1054  | 0.719793 |
| <i>Gm9311</i>        | chr17:73190257-73191685 | 0.6990  | 1.6939  | 1.2769  | 0.002941 |
| <i>Nlrc4</i>         | chr17:74426294-74459108 | 0.1742  | 0.2528  | 0.5374  | 0.233135 |
| <i>Rasgrp3</i>       | chr17:75435904-75529043 | 0.1073  | 0.2143  | 0.9973  | 0.049853 |
| <i>Gm10093</i>       | chr17:78491564-78493541 | 0.6426  | 0.8486  | 0.4013  | 0.169656 |
| <i>Sult6b1</i>       | chr17:78883937-78906992 | 1.6780  | 1.7426  | 0.0545  | 0.830496 |
| <i>Gm17315</i>       | chr17:79354698-79358022 | 1.1237  | 1.0222  | -0.1366 | 0.627317 |
| <i>Rmdn2</i>         | chr17:79614899-79682152 | 1.5383  | 1.5279  | -0.0097 | 0.961130 |
| <i>Morn2</i>         | chr17:80290211-80297473 | 0.5320  | 0.6691  | 0.3307  | 0.646541 |
| <i>Arhgef33</i>      | chr17:80307406-80388688 | 0.4448  | 0.4054  | -0.1338 | 0.566947 |
| <i>Cdkl4</i>         | chr17:80523549-80563834 | 1.0320  | 0.8465  | -0.2858 | 0.418869 |
| <i>1110020A21Rik</i> | chr17:84954966-84957710 | 2.7157  | 2.9729  | 0.1306  | 0.728472 |
| <i>Slc3a1</i>        | chr17:85028346-85064243 | 0.9609  | 1.3163  | 0.4541  | 0.067613 |
| <i>Camkmt</i>        | chr17:85090725-85458139 | 1.6145  | 1.9178  | 0.2484  | 0.378725 |
| <i>Gm10309</i>       | chr17:86497731-86505232 | 0.4059  | 0.5520  | 0.4437  | 0.335486 |
| <i>Gm5499</i>        | chr17:87078262-87080230 | 0.6103  | 0.4831  | -0.3370 | 0.419841 |
| <i>Gm15978</i>       | chr17:87329763-87332052 | 2.8284  | 3.1770  | 0.1677  | 0.385308 |
| <i>Epcam</i>         | chr17:87635978-87651106 | 1.4746  | 1.3252  | -0.1541 | 0.647458 |
| <i>2700099C18Rik</i> | chr17:94750099-94775132 | 1.1698  | 1.5761  | 0.4301  | 0.194814 |
| <i>Gm26734</i>       | chr17:94834905-94836642 | 0.8474  | 0.8984  | 0.0843  | 0.844524 |
| <i>Mefv</i>          | chr16:3707214-3718124   | 0.3608  | 0.9515  | 1.3991  | 0.030996 |
| <i>NA</i>            | chr16:3908856-3909192   | 7.2208  | 7.7865  | 0.1088  | 0.506108 |
| <i>Gm15538</i>       | chr16:3926427-3926740   | 3.5902  | 2.7347  | -0.3927 | 0.472177 |
| <i>Gm15539</i>       | chr16:3927605-3928171   | 2.3771  | 2.3510  | -0.0159 | 0.961010 |
| <i>Gm15537</i>       | chr16:3927788-3929357   | 4.0961  | 3.8628  | -0.0846 | 0.737109 |
| <i>Srl</i>           | chr16:4480215-4541816   | 0.1908  | 0.2016  | 0.0791  | 0.737545 |
| <i>Pam16</i>         | chr16:4616463-4624988   | 1.4860  | 1.8975  | 0.3527  | 0.157717 |
| <i>Gm15859</i>       | chr16:4729868-4730809   | 1.9815  | 2.4846  | 0.3264  | 0.030602 |
| <i>4930562C15Rik</i> | chr16:4835415-4867691   | 0.4118  | 0.3443  | -0.2583 | 0.421725 |
| <i>4930451G09Rik</i> | chr16:4968935-4978962   | 0.6896  | 0.7126  | 0.0475  | 0.881021 |
| <i>Rogdi</i>         | chr16:5008729-5013517   | 1.9860  | 2.2181  | 0.1594  | 0.448079 |
| <i>Ppl</i>           | chr16:5086290-5132481   | 0.2689  | 0.3702  | 0.4611  | 0.260331 |
| <i>Gm15983</i>       | chr16:5254785-5289621   | 0.4131  | 0.3807  | -0.1179 | 0.420842 |
| <i>Abat</i>          | chr16:8513428-8621568   | 0.1918  | 0.2436  | 0.3450  | 0.247989 |
| <i>Gm24814</i>       | chr16:8738320-8738390   | 37.5421 | 23.8764 | -0.6529 | 0.146477 |
| <i>Gm15558</i>       | chr16:10669247-10683539 | 0.4940  | 0.3996  | -0.3061 | 0.546184 |
| <i>Gm4262</i>        | chr16:11008897-11015186 | 0.3857  | 0.3012  | -0.3565 | 0.478754 |
| <i>4930509G22Rik</i> | chr16:11178175-11192292 | 0.4964  | 0.4883  | -0.0240 | 0.935414 |
| <i>Mpv17l</i>        | chr16:13903160-13949619 | 0.2109  | 0.2644  | 0.3265  | 0.124600 |
| <i>Gm15950</i>       | chr16:13919426-13921399 | 1.6562  | 1.8684  | 0.1740  | 0.381357 |
| <i>Myh11</i>         | chr16:14194526-14291408 | 0.0598  | 0.0853  | 0.5118  | 0.368611 |
| <i>Gm15869</i>       | chr16:14316073-14317285 | 3.6108  | 3.5062  | -0.0424 | 0.838372 |
| <i>Gm15585</i>       | chr16:17092814-17096350 | 4.7167  | 5.5132  | 0.2251  | 0.186952 |
| <i>Ccdc116</i>       | chr16:17139063-17147229 | 0.6505  | 0.5525  | -0.2355 | 0.336583 |
| <i>Serpind1</i>      | chr16:17331370-17343575 | 0.7488  | 1.1805  | 0.6567  | 0.097575 |
| <i>Ccdc74a</i>       | chr16:17646469-17650738 | 0.5794  | 0.7468  | 0.3662  | 0.405622 |
| <i>Rpl26-ps4</i>     | chr16:17711667-17712105 | 2.1831  | 1.5404  | -0.5031 | 0.016336 |
| <i>Tssk2</i>         | chr16:17898636-17900023 | 0.8259  | 1.2505  | 0.5986  | 0.115172 |
| <i>Prodh</i>         | chr16:18060356-18090203 | 0.8385  | 0.6808  | -0.3005 | 0.171598 |
| <i>Gm15954</i>       | chr16:18069213-18070362 | 2.4567  | 2.2737  | -0.1117 | 0.615482 |
| <i>Mir1306</i>       | chr16:18284238-18284317 | 47.8353 | 48.4345 | 0.0180  | 0.925446 |
| <i>Gm24572</i>       | chr16:18284549-18284637 | 15.3259 | 14.5335 | -0.0766 | 0.828411 |
| <i>Gm15764</i>       | chr16:18416681-18421997 | 2.5455  | 3.1291  | 0.2978  | 0.292568 |
| <i>Gm16314</i>       | chr16:18498900-18501658 | 4.2869  | 3.7901  | -0.1777 | 0.421233 |
| <i>NA</i>            | chr16:18923072-18925657 | 2.9119  | 3.0220  | 0.0535  | 0.851114 |
| <i>Igll2</i>         | chr16:19198400-19200351 | 1.0991  | 1.3780  | 0.3263  | 0.746141 |
| <i>Map6d1</i>        | chr16:20233309-20241358 | 0.6376  | 0.9465  | 0.5699  | 0.094660 |
| <i>Vwa5b2</i>        | chr16:20589470-20605377 | 0.1939  | 0.1304  | -0.5719 | 0.079005 |
| <i>Camk2n2</i>       | chr16:20619214-20621287 | 0.7768  | 0.7183  | -0.1131 | 0.729583 |
| <i>Gm4462</i>        | chr16:20664115-20664607 | 2.4106  | 3.7007  | 0.6184  | 0.011960 |
| <i>NA</i>            | chr16:20677316-20677395 | 7.3591  | 8.2431  | 0.1636  | 0.721820 |
| <i>Fam131a</i>       | chr16:20693281-20703048 | 0.7076  | 1.0005  | 0.4997  | 0.080481 |
| <i>Map3k13</i>       | chr16:21891968-21931877 | 0.3096  | 0.2792  | -0.1491 | 0.615508 |
| <i>Gm6467</i>        | chr16:21896505-21897116 | 1.0862  | 0.8695  | -0.3211 | 0.488405 |
| <i>Igf2bp2</i>       | chr16:22059008-22163299 | 0.1489  | 0.2256  | 0.5994  | 0.159389 |
| <i>Etv5</i>          | chr16:22381308-22439719 | 0.3130  | 0.4060  | 0.3753  | 0.244608 |
| <i>Dgkg</i>          | chr16:22468460-22657221 | 0.0999  | 0.0842  | -0.2465 | 0.670338 |
| <i>Gm15746</i>       | chr16:23197094-23198121 | 2.0083  | 2.2355  | 0.1546  | 0.649556 |
| <i>Gm20319</i>       | chr16:26714445-26755502 | 1.9645  | 1.9509  | -0.0100 | 0.939864 |
| <i>Tmem44</i>        | chr16:30511854-30550842 | 0.1033  | 0.0863  | -0.2593 | 0.551436 |



|                      |                         |        |         |         |          |
|----------------------|-------------------------|--------|---------|---------|----------|
| <i>Fam43a</i>        | chr16:30599722-30602797 | 0.7849 | 1.1790  | 0.5869  | 0.428196 |
| <i>Pigz</i>          | chr16:31933850-31946046 | 0.9671 | 1.1168  | 0.2076  | 0.248220 |
| <i>Gm25848</i>       | chr16:32243711-32243855 | 7.8289 | 11.3639 | 0.5376  | 0.376427 |
| <i>Tctex1d2</i>      | chr16:32419701-32429099 | 0.3869 | 0.5240  | 0.4374  | 0.396161 |
| <i>Tnk2os</i>        | chr16:32665222-32668197 | 1.1735 | 1.0787  | -0.1215 | 0.793278 |
| <i>lqcg</i>          | chr16:33015384-33056218 | 0.9226 | 1.2090  | 0.3900  | 0.054928 |
| <i>Lmln</i>          | chr16:33062520-33127695 | 0.4445 | 0.5354  | 0.2685  | 0.102797 |
| <i>Slc12a8</i>       | chr16:33517327-33664135 | 0.1658 | 0.3170  | 0.9353  | 0.113300 |
| <i>Gm15658</i>       | chr16:33770429-33787112 | 4.4205 | 4.7483  | 0.1032  | 0.609241 |
| <i>Adcy5</i>         | chr16:35154876-35305737 | 0.3947 | 0.4030  | 0.0300  | 0.934672 |
| <i>Gm5963</i>        | chr16:35573316-35573556 | 3.9603 | 3.4797  | -0.1866 | 0.508124 |
| <i>Gm26838</i>       | chr16:35805946-35808946 | 1.0633 | 1.5809  | 0.5722  | 0.058784 |
| <i>Cd86</i>          | chr16:36603868-36666081 | 0.6308 | 1.1244  | 0.8338  | 0.030629 |
| <i>lldr1</i>         | chr16:36693977-36726804 | 0.3517 | 0.4614  | 0.3919  | 0.475257 |
| <i>Gm8425</i>        | chr16:36778833-36779602 | 1.6161 | 0.9038  | -0.8385 | 0.028300 |
| <i>NA</i>            | chr16:36875140-36875638 | 1.6982 | 1.7742  | 0.0631  | 0.844805 |
| <i>Fbxo40</i>        | chr16:36963459-36990467 | 0.6197 | 0.6993  | 0.1745  | 0.497534 |
| <i>D930030I03Rik</i> | chr16:38451981-38453493 | 3.0388 | 3.9667  | 0.3844  | 0.154062 |
| <i>Cd80</i>          | chr16:38458932-38486933 | 0.5700 | 1.2103  | 1.0863  | 0.112660 |
| <i>Gm15953</i>       | chr16:38512564-38514296 | 1.6887 | 1.6980  | 0.0079  | 0.979218 |
| <i>Gm17103</i>       | chr16:38569322-38573300 | 3.8769 | 4.8645  | 0.3274  | 0.026736 |
| <i>Gm15530</i>       | chr16:38685314-38685869 | 1.6551 | 1.9263  | 0.2189  | 0.669990 |
| <i>B4galt4</i>       | chr16:38742263-38769049 | 0.3253 | 0.4810  | 0.5645  | 0.039902 |
| <i>Gm15712</i>       | chr16:43184572-43185728 | 1.5751 | 1.7239  | 0.1303  | 0.645173 |
| <i>Gm15711</i>       | chr16:43312593-43313128 | 3.1826 | 3.3242  | 0.0628  | 0.747739 |
| <i>Gm15713</i>       | chr16:43410517-43420196 | 1.3639 | 1.6139  | 0.2428  | 0.312475 |
| <i>Tigit</i>         | chr16:43648860-43664184 | 1.3719 | 3.1108  | 1.1811  | 0.269524 |
| <i>Zdhhc23</i>       | chr16:43969077-43979093 | 2.4952 | 2.4721  | -0.0134 | 0.952824 |
| <i>Gm15591</i>       | chr16:45736502-45737318 | 3.7489 | 4.2954  | 0.1963  | 0.275454 |
| <i>Phldb2</i>        | chr16:45746242-45953598 | 0.0550 | 0.0559  | 0.0233  | 0.958977 |
| <i>Gm15518</i>       | chr16:49758575-49798870 | 1.0558 | 1.2771  | 0.2745  | 0.297228 |
| <i>5330426P16Rik</i> | chr16:50727965-50732743 | 3.7843 | 3.6123  | -0.0671 | 0.803096 |
| <i>Gm6767</i>        | chr16:51362451-51363832 | 1.4517 | 1.5065  | 0.0535  | 0.690618 |
| <i>Abi3bp</i>        | chr16:56477845-56690128 | 0.3770 | 0.3484  | -0.1135 | 0.692994 |
| <i>Cmss1</i>         | chr16:57302198-57606825 | 3.6663 | 3.7834  | 0.0454  | 0.846000 |
| <i>Gpr15</i>         | chr16:58717434-58718724 | 1.1437 | 1.7710  | 0.6308  | 0.289864 |
| <i>Gm9581</i>        | chr16:59558012-59600886 | 0.4844 | 0.7321  | 0.5959  | 0.230648 |
| <i>Stx19</i>         | chr16:62814675-62824346 | 0.6309 | 0.5865  | -0.1054 | 0.793844 |
| <i>Pros1</i>         | chr16:62854306-62929346 | 0.4977 | 0.5760  | 0.2109  | 0.545698 |
| <i>Btg3</i>          | chr16:78359859-78377192 | 0.6949 | 0.7907  | 0.1862  | 0.546728 |
| <i>Rps19-ps12</i>    | chr16:79914459-79914889 | 1.5611 | 1.1656  | -0.4214 | 0.373300 |
| <i>Cyyr1</i>         | chr16:85421532-85553397 | 0.0241 | 0.0257  | 0.0923  | 0.939287 |
| <i>Gm2541</i>        | chr16:85553232-85553943 | 0.3006 | 0.3205  | 0.0927  | 0.939287 |
| <i>B130034C11Rik</i> | chr16:87495998-87504033 | 1.5484 | 1.4490  | -0.0958 | 0.720012 |
| <i>Gm17518</i>       | chr16:90727511-90729120 | 0.6891 | 0.6958  | 0.0140  | 0.974834 |
| <i>Gm15965</i>       | chr16:90983906-90987237 | 1.0640 | 1.4139  | 0.4102  | 0.317506 |
| <i>4931406G06Rik</i> | chr16:91044655-91056677 | 0.3505 | 0.4021  | 0.1980  | 0.793747 |
| <i>4932438H23Rik</i> | chr16:91053934-91095122 | 0.2519 | 0.3555  | 0.4972  | 0.342997 |
| <i>Gm15976</i>       | chr16:91924437-91928635 | 2.9968 | 4.3713  | 0.5446  | 0.065273 |
| <i>D430001F17Rik</i> | chr16:91931236-91962915 | 0.5520 | 0.4681  | -0.2377 | 0.444096 |
| <i>NA</i>            | chr16:92078061-92083808 | 5.8882 | 8.1804  | 0.4743  | 0.138294 |
| <i>Gm16310</i>       | chr16:92094567-92096490 | 2.3853 | 2.3273  | -0.0355 | 0.921328 |
| <i>1700048M11Rik</i> | chr16:92308715-92312466 | 2.7175 | 2.9287  | 0.1080  | 0.725422 |
| <i>Gm26626</i>       | chr16:92612813-92620105 | 4.6131 | 4.9525  | 0.1024  | 0.698431 |
| <i>2310043M15Rik</i> | chr16:93792149-93794888 | 1.0986 | 1.3076  | 0.2513  | 0.287870 |
| <i>Gm15971</i>       | chr16:94620376-94620587 | 8.4061 | 10.3544 | 0.3007  | 0.453890 |
| <i>Gm15317</i>       | chr16:96145475-96147584 | 1.4483 | 1.1824  | -0.2926 | 0.517483 |
| <i>Dscam</i>         | chr16:96592078-97170752 | 0.1202 | 0.1780  | 0.5660  | 0.059255 |
| <i>Tmprss2</i>       | chr16:97564683-97611195 | 0.2257 | 0.3965  | 0.8128  | 0.197754 |
| <i>1810055G02Rik</i> | chr19:3708332-3717881   | 1.1982 | 1.2371  | 0.0460  | 0.858667 |
| <i>Gm16066</i>       | chr19:3798614-3852419   | 2.6303 | 2.9494  | 0.1652  | 0.488286 |
| <i>Aldh3b1</i>       | chr19:3913492-3929761   | 1.5880 | 1.5751  | -0.0117 | 0.941113 |
| <i>Gm16312</i>       | chr19:4000757-4001232   | 9.5915 | 7.8398  | -0.2909 | 0.223452 |
| <i>Cabp4</i>         | chr19:4135424-4139609   | 0.3248 | 0.2267  | -0.5190 | 0.336853 |
| <i>Gm26115</i>       | chr19:4215401-4215488   | 3.8404 | 1.0936  | -1.8121 | 0.284155 |
| <i>Lrfn4</i>         | chr19:4611784-4615667   | 0.1987 | 0.2572  | 0.3721  | 0.606885 |
| <i>Gm960</i>         | chr19:4625840-4698668   | 0.1264 | 0.1466  | 0.2129  | 0.662152 |
| <i>Sptbn2</i>        | chr19:4711207-4752353   | 0.2032 | 0.2707  | 0.4137  | 0.105125 |
| <i>Ccdc87</i>        | chr19:4839365-4842528   | 0.1719 | 0.1560  | -0.1399 | 0.838180 |
| <i>Bbs1</i>          | chr19:4886897-4906627   | 0.4940 | 0.4694  | -0.0736 | 0.833514 |
| <i>Slc29a2</i>       | chr19:5024005-5031971   | 0.7199 | 0.5861  | -0.2967 | 0.306787 |

|                      |                         |         |         |         |          |
|----------------------|-------------------------|---------|---------|---------|----------|
| <i>Rin1</i>          | chr19:5050807-5057071   | 0.4130  | 0.3433  | -0.2669 | 0.481554 |
| <i>Cnih2</i>         | chr19:5092870-5098418   | 2.9260  | 2.0854  | -0.4887 | 0.163379 |
| <i>Tsga10ip</i>      | chr19:5390048-5394401   | 3.9315  | 4.1953  | 0.0937  | 0.788927 |
| <i>Gm6293</i>        | chr19:5415564-5415759   | 5.6255  | 8.8122  | 0.6475  | 0.169676 |
| <i>Fosl1</i>         | chr19:5447702-5455945   | 1.5522  | 1.3635  | -0.1870 | 0.444202 |
| <i>Efemp2</i>        | chr19:5473972-5481853   | 1.0640  | 1.1380  | 0.0970  | 0.604936 |
| <i>Kcnk7</i>         | chr19:5704366-5707101   | 0.7476  | 0.9712  | 0.3775  | 0.073044 |
| <i>Gm16538</i>       | chr19:5727205-5731627   | 5.3019  | 6.5757  | 0.3106  | 0.197316 |
| <i>Gm8034</i>        | chr19:6044690-6044822   | 6.6010  | 6.6029  | 0.0004  | 0.998977 |
| <i>BC048609</i>      | chr19:6080032-6080788   | 5.4281  | 4.4928  | -0.2728 | 0.042339 |
| <i>Cdca5</i>         | chr19:6084982-6091777   | 0.5691  | 1.1181  | 0.9742  | 0.082764 |
| <i>Gm14963</i>       | chr19:6268794-6276605   | 0.1254  | 0.1143  | -0.1346 | 0.856665 |
| <i>Flrt1</i>         | chr19:7092013-7105729   | 0.1058  | 0.1386  | 0.3902  | 0.347012 |
| <i>Rcor2</i>         | chr19:7267324-7275225   | 0.6826  | 0.7158  | 0.0685  | 0.732487 |
| <i>2700081015Rik</i> | chr19:7417624-7425904   | 0.4087  | 0.3739  | -0.1284 | 0.487404 |
| <i>Gm25855</i>       | chr19:8723995-8724060   | 33.8224 | 44.6106 | 0.3994  | 0.045583 |
| <i>Gm24453</i>       | chr19:8724867-8724943   | 36.6527 | 38.6853 | 0.0779  | 0.700728 |
| <i>Gm22680</i>       | chr19:8725340-8725409   | 18.5690 | 29.6767 | 0.6764  | 0.148637 |
| <i>Gm23246</i>       | chr19:8725593-8725660   | 20.7900 | 32.7807 | 0.6570  | 0.029134 |
| <i>1700092M07Rik</i> | chr19:8740717-8741225   | 3.0454  | 2.5486  | -0.2570 | 0.391152 |
| <i>Zbtb3</i>         | chr19:8802529-8804854   | 1.7053  | 1.3375  | -0.3505 | 0.154949 |
| <i>Gm25822</i>       | chr19:8888537-8888685   | 16.9954 | 13.6703 | -0.3141 | 0.203653 |
| <i>Gm9750</i>        | chr19:9135156-9279175   | 0.1960  | 0.2225  | 0.1828  | 0.731815 |
| <i>Pcna-ps2</i>      | chr19:9283237-9284494   | 0.5427  | 0.4499  | -0.2706 | 0.500088 |
| <i>Best1</i>         | chr19:9985173-10001633  | 0.4181  | 0.6250  | 0.5799  | 0.264290 |
| <i>Myrf</i>          | chr19:10208271-10240748 | 0.6295  | 0.5529  | -0.1871 | 0.463550 |
| <i>Ppp1r32</i>       | chr19:10474256-10482897 | 0.9121  | 0.8281  | -0.1394 | 0.624785 |
| <i>Slc15a3</i>       | chr19:10839726-10859362 | 0.1599  | 0.2887  | 0.8520  | 0.101029 |
| <i>Ptgdr2</i>        | chr19:10937159-10942511 | 0.6110  | 0.8583  | 0.4902  | 0.041300 |
| <i>Ms4a1</i>         | chr19:11250602-11266151 | 0.2790  | 0.6071  | 1.1218  | 0.182364 |
| <i>Ms4a4d</i>        | chr19:11536800-11558467 | 0.8706  | 1.4208  | 0.7067  | 0.079278 |
| <i>Mpeg1</i>         | chr19:12460778-12465284 | 0.2959  | 0.8745  | 1.5631  | 0.000358 |
| <i>A330040F15Rik</i> | chr19:12585867-12596566 | 0.9651  | 1.0952  | 0.1825  | 0.647639 |
| <i>Gna14</i>         | chr19:16435666-16610818 | 0.7096  | 0.9541  | 0.4271  | 0.346869 |
| <i>Gm8250</i>        | chr19:18581454-18582228 | 1.5897  | 1.6691  | 0.0703  | 0.803766 |
| <i>2410127L17Rik</i> | chr19:18670779-18704788 | 1.6987  | 1.7205  | 0.0184  | 0.919914 |
| <i>Trpm6</i>         | chr19:18749982-18892510 | 0.1214  | 0.2526  | 1.0568  | 0.107511 |
| <i>Anxa1</i>         | chr19:20373427-20390944 | 0.5988  | 0.8399  | 0.4882  | 0.248259 |
| <i>Gm9493</i>        | chr19:23619741-23620320 | 1.8858  | 1.1086  | -0.7665 | 0.254825 |
| <i>Gm6563</i>        | chr19:23675843-23676712 | 2.7684  | 2.5028  | -0.1455 | 0.558188 |
| <i>Pip5k1b</i>       | chr19:24294793-24555872 | 0.2371  | 0.2676  | 0.1749  | 0.750261 |
| <i>Gm24252</i>       | chr19:25166084-25166216 | 5.5706  | 7.4790  | 0.4250  | 0.200482 |
| <i>Gm20616</i>       | chr19:26620821-26623419 | 1.0733  | 0.9059  | -0.2446 | 0.276944 |
| <i>4931403E22Rik</i> | chr19:26768800-26823907 | 3.2709  | 4.1828  | 0.3548  | 0.013450 |
| <i>Gm20407</i>       | chr19:27994196-27995693 | 1.5435  | 1.6172  | 0.0673  | 0.807717 |
| <i>Glis3</i>         | chr19:28258850-28680077 | 0.1185  | 0.1218  | 0.0400  | 0.951853 |
| <i>Gm5822</i>        | chr19:28862329-28863707 | 1.8041  | 1.6926  | -0.0921 | 0.264868 |
| <i>4430402I18Rik</i> | chr19:28901267-28967800 | 0.3234  | 0.2910  | -0.1523 | 0.738257 |
| <i>Gm10136</i>       | chr19:29003404-29003842 | 1.4415  | 1.7958  | 0.3171  | 0.404549 |
| <i>Pdcd1lg2</i>      | chr19:29410918-29471157 | 1.3981  | 2.0475  | 0.5504  | 0.286189 |
| <i>2700046G09Rik</i> | chr19:32389215-32391184 | 0.6103  | 0.5891  | -0.0509 | 0.928985 |
| <i>Papss2</i>        | chr19:32620004-32667187 | 0.7118  | 1.0440  | 0.5526  | 0.069251 |
| <i>Rnls</i>          | chr19:33137746-33392295 | 1.5601  | 1.5727  | 0.0116  | 0.951243 |
| <i>Acta2</i>         | chr19:34241089-34255336 | 1.3138  | 1.5996  | 0.2840  | 0.239602 |
| <i>Pank1</i>         | chr19:34810893-34879455 | 0.6170  | 0.5249  | -0.2332 | 0.463067 |
| <i>1500017E21Rik</i> | chr19:36614051-36705641 | 1.0600  | 0.9404  | -0.1727 | 0.295693 |
| <i>Fgfbp3</i>        | chr19:36917549-36919615 | 1.4022  | 1.4694  | 0.0676  | 0.691911 |
| <i>Cyp26c1</i>       | chr19:37685580-37693398 | 0.4859  | 0.6051  | 0.3165  | 0.474527 |
| <i>Cep55</i>         | chr19:38055024-38074425 | 1.0577  | 1.6679  | 0.6571  | 0.016391 |
| <i>Plice1</i>        | chr19:38481108-38785030 | 0.0338  | 0.0451  | 0.4190  | 0.455578 |
| <i>Gm27042</i>       | chr19:40589434-40594862 | 2.9141  | 2.2369  | -0.3815 | 0.111605 |
| <i>Pik3ap1</i>       | chr19:41274217-41385070 | 0.4495  | 0.8948  | 0.9932  | 0.076324 |
| <i>Pgam1</i>         | chr19:41911870-41918664 | 1.8201  | 1.6717  | -0.1226 | 0.367691 |
| <i>Loxl4</i>         | chr19:42593981-42612813 | 0.6249  | 0.6834  | 0.1292  | 0.726904 |
| <i>Pyroxd2</i>       | chr19:42725857-42752775 | 1.2654  | 1.2775  | 0.0138  | 0.947657 |
| <i>Gm16244</i>       | chr19:42779031-42781454 | 0.7787  | 0.9094  | 0.2239  | 0.462815 |
| <i>Gm6776</i>        | chr19:43280797-43281697 | 1.8152  | 1.3271  | -0.4519 | 0.244201 |
| <i>Mir5114</i>       | chr19:44303170-44303231 | 23.4038 | 31.7614 | 0.4405  | 0.382512 |
| <i>Scd4</i>          | chr19:44333091-44346743 | 0.2386  | 0.2226  | -0.1005 | 0.837773 |
| <i>Scd1</i>          | chr19:44394450-44407709 | 0.0582  | 0.1472  | 1.3399  | 0.222516 |
| <i>Wnt8b</i>         | chr19:44493471-44514273 | 0.1922  | 0.2183  | 0.1839  | 0.761281 |

|               |                         |         |         |         |          |
|---------------|-------------------------|---------|---------|---------|----------|
| Lzts2         | chr19:45015175-45027104 | 1.3383  | 1.0651  | -0.3295 | 0.025261 |
| Tmem180       | chr19:46341120-46375252 | 0.6784  | 0.5690  | -0.2536 | 0.478876 |
| 2010012O05Rik | chr19:46689905-46703382 | 1.6850  | 1.4634  | -0.2034 | 0.295453 |
| Usmg5         | chr19:47083470-47090625 | 4.2499  | 5.6109  | 0.4008  | 0.141697 |
| Gm16068       | chr19:47606143-47617106 | 1.7771  | 3.0551  | 0.7817  | 0.150236 |
| Col17a1       | chr19:47646343-47692094 | 0.2214  | 0.1930  | -0.1984 | 0.669616 |
| Cfap43        | chr19:47737560-47919287 | 0.3834  | 0.5440  | 0.5050  | 0.039789 |
| Rpl13a-ps1    | chr19:50030123-50030735 | 2.6516  | 2.1518  | -0.3013 | 0.354000 |
| Gm10197       | chr19:53371565-53371766 | 12.6836 | 13.3234 | 0.0710  | 0.728808 |
| Rbm20         | chr19:53677305-53867080 | 0.0966  | 0.1928  | 0.9972  | 0.166269 |
| Gm26874       | chr19:57459571-57461553 | 0.6200  | 0.5255  | -0.2386 | 0.513780 |
| Hspa12a       | chr19:58795750-58860984 | 0.3431  | 0.2341  | -0.5515 | 0.410332 |
| 4930506M07Rik | chr19:58973357-59076069 | 0.2511  | 0.4910  | 0.9676  | 0.068417 |
| Gm17203       | chr19:59896240-59901062 | 0.3591  | 0.5375  | 0.5820  | 0.055163 |
| 4933412A08Rik | chr19:60226333-60227678 | 1.8618  | 1.2795  | -0.5411 | 0.039756 |
| Gm25238       | chr19:60580528-60580617 | 44.2737 | 29.4447 | -0.5884 | 0.005687 |
| Eif3a         | chr19:60761115-60790693 | 79.2994 | 89.8130 | 0.1796  | 0.078962 |
| Gm26158       | chr19:60775520-60775639 | 9.3615  | 9.7810  | 0.0632  | 0.753765 |
| Gm15959       | chr19:60815448-60815816 | 2.7065  | 2.9879  | 0.1427  | 0.680031 |
| Gm26983       | chr1:7136198-7136586    | 1.3595  | 1.6216  | 0.2543  | 0.710470 |
| Adhfe1        | chr1:9547947-9577970    | 0.2391  | 0.3580  | 0.5823  | 0.082304 |
| Mybl1         | chr1:9667414-9700209    | 0.4049  | 0.4621  | 0.1908  | 0.553795 |
| Snord87       | chr1:9942462-9942549    | 20.6340 | 22.9353 | 0.1525  | 0.649012 |
| Gm26348       | chr1:10166538-10166778  | 3.1382  | 3.5486  | 0.1773  | 0.513220 |
| Rpl5-ps1      | chr1:14865071-14865965  | 0.6144  | 1.0034  | 0.7077  | 0.325462 |
| Sbspon        | chr1:15853861-15892722  | 0.5051  | 0.7388  | 0.5486  | 0.055996 |
| Ly96          | chr1:16688455-16709605  | 1.5549  | 2.3556  | 0.5993  | 0.352522 |
| Efhc1         | chr1:20951625-20990838  | 0.3349  | 0.4759  | 0.5071  | 0.062479 |
| Tmem14a       | chr1:21218574-21230167  | 1.4041  | 1.6471  | 0.2304  | 0.310640 |
| Gsta3         | chr1:21240588-21265361  | 0.2439  | 0.3815  | 0.6454  | 0.236832 |
| Gm7658        | chr1:21511869-21513127  | 0.6010  | 0.4240  | -0.5033 | 0.305185 |
| Gm26580       | chr1:21959841-21962530  | 0.9538  | 0.9788  | 0.0373  | 0.941240 |
| Ogfrl1        | chr1:23366423-23383175  | 0.2793  | 0.4090  | 0.5502  | 0.141852 |
| NA            | chr1:33669842-33670712  | 1.5779  | 1.3510  | -0.2239 | 0.503690 |
| Bag2          | chr1:33745483-33757794  | 0.4499  | 0.4110  | -0.1304 | 0.770324 |
| Gm15455       | chr1:33835898-33838914  | 0.3461  | 0.2529  | -0.4524 | 0.005017 |
| Gm26788       | chr1:34165855-34178271  | 0.4788  | 1.0203  | 1.0916  | 0.175338 |
| Fer1l5        | chr1:36372290-36422110  | 0.7494  | 0.5139  | -0.5442 | 0.094522 |
| Vwa3b         | chr1:37026595-37076996  | 0.3529  | 0.4362  | 0.3059  | 0.321797 |
| 4930439A04Rik | chr1:37329666-37334172  | 0.8124  | 1.0221  | 0.3314  | 0.400896 |
| 4930594C11Rik | chr1:37487192-37488982  | 1.3052  | 1.8752  | 0.5228  | 0.018192 |
| 2010300C02Rik | chr1:37611676-37720085  | 0.2416  | 0.3365  | 0.4780  | 0.106580 |
| 4930556I23Rik | chr1:37614258-37615372  | 1.1509  | 0.8002  | -0.5244 | 0.455241 |
| Gm16150       | chr1:38235419-38246666  | 2.6265  | 3.6379  | 0.4700  | 0.066647 |
| Gm16151       | chr1:38307901-38311930  | 4.7787  | 5.6226  | 0.2346  | 0.217130 |
| Gm16152       | chr1:38384948-38393974  | 1.2157  | 1.6311  | 0.4241  | 0.421086 |
| Gm23722       | chr1:39573745-39573875  | 10.0033 | 11.7065 | 0.2268  | 0.480759 |
| Il1r2         | chr1:40084767-40125219  | 2.2258  | 3.3466  | 0.5884  | 0.492540 |
| Il1r1         | chr1:40225079-40316198  | 0.0705  | 0.1266  | 0.8436  | 0.475786 |
| Il1r1         | chr1:40429569-40465415  | 0.2594  | 0.3853  | 0.5705  | 0.294003 |
| 8430432A02Rik | chr1:43092587-43093835  | 1.2358  | 1.4816  | 0.2616  | 0.416189 |
| Fhl2          | chr1:43123073-43163961  | 1.1024  | 1.1608  | 0.0745  | 0.777534 |
| Gm16103       | chr1:43785909-43787188  | 0.4253  | 0.4595  | 0.1117  | 0.833272 |
| Gm8251        | chr1:44055951-44061936  | 0.6289  | 0.6402  | 0.0257  | 0.859289 |
| Slc40a1       | chr1:45908069-45925594  | 0.1615  | 0.1916  | 0.2466  | 0.769290 |
| Gm3940        | chr1:52090634-52091066  | 0.9456  | 1.3670  | 0.5317  | 0.236789 |
| 1700019D03Rik | chr1:52922323-52963260  | 0.2846  | 0.9496  | 1.7382  | 0.060800 |
| Hecw2         | chr1:53806881-54195168  | 0.0540  | 0.0378  | -0.5145 | 0.285098 |
| Gm24053       | chr1:54769217-54769322  | 17.5912 | 21.5782 | 0.2947  | 0.129561 |
| NA            | chr1:55335366-55335883  | 2.0382  | 2.1145  | 0.0530  | 0.884665 |
| Spats2l       | chr1:57774161-57948394  | 0.2864  | 0.2761  | -0.0525 | 0.902862 |
| Tmem237       | chr1:59100593-59120096  | 1.6657  | 1.6824  | 0.0144  | 0.944106 |
| G730003C15Rik | chr1:59119832-59122139  | 0.6891  | 0.6599  | -0.0626 | 0.886264 |
| Mpp4          | chr1:59120935-59163389  | 0.8046  | 0.7723  | -0.0591 | 0.501003 |
| Gm973         | chr1:59516263-59634508  | 0.1950  | 0.2070  | 0.0862  | 0.826567 |
| Gm26287       | chr1:59704257-59704338  | 13.8609 | 12.2743 | -0.1754 | 0.566169 |
| Raph1         | chr1:60483190-60567104  | 0.9324  | 1.4344  | 0.6214  | 0.183681 |
| 2310016D23Rik | chr1:60778842-60803790  | 2.8794  | 2.1818  | -0.4002 | 0.385742 |
| Gm11609       | chr1:60792489-60793832  | 0.4726  | 0.5661  | 0.2602  | 0.705696 |
| Rpl18-ps1     | chr1:60900897-60901422  | 3.3777  | 3.1755  | -0.0891 | 0.649506 |
| Nrp2          | chr1:62703284-62818695  | 0.2021  | 0.1800  | -0.1666 | 0.696730 |

|               |                          |         |         |         |          |
|---------------|--------------------------|---------|---------|---------|----------|
| Gm26457       | chr1:63178676-63178754   | 24.7790 | 24.6483 | -0.0076 | 0.980078 |
| Snora41       | chr1:63179003-63179135   | 12.0330 | 13.9308 | 0.2113  | 0.206964 |
| Gpr1          | chr1:63182690-63214543   | 0.6562  | 0.4778  | -0.4576 | 0.285008 |
| Map2          | chr1:66175272-66442583   | 0.0670  | 0.2423  | 1.8550  | 0.078529 |
| Gm15789       | chr1:66783912-66786445   | 1.8756  | 2.4613  | 0.3921  | 0.192833 |
| Gm15793       | chr1:66849107-66849602   | 1.4537  | 1.2135  | -0.2606 | 0.386174 |
| Gm5528        | chr1:72004287-72004770   | 1.5453  | 1.3465  | -0.1986 | 0.577013 |
| Gm25360       | chr1:72226239-72226430   | 19.1020 | 21.7143 | 0.1849  | 0.624056 |
| D230017M19Rik | chr1:72236464-72274869   | 0.1443  | 0.2605  | 0.8518  | 0.045117 |
| Gm25939       | chr1:72255007-72255198   | 17.1098 | 19.9572 | 0.2221  | 0.696060 |
| Pecr          | chr1:72259166-72284314   | 0.6312  | 0.7932  | 0.3297  | 0.326879 |
| Cxcr1         | chr1:74191784-74194631   | 1.2739  | 1.2182  | -0.0645 | 0.810950 |
| Gpbar1        | chr1:74278549-74279624   | 0.7004  | 0.7380  | 0.0754  | 0.875444 |
| Mir26b        | chr1:74394309-74394394   | 22.6251 | 19.6683 | -0.2021 | 0.478476 |
| Vil1          | chr1:74409375-74435559   | 0.2423  | 0.2755  | 0.1851  | 0.586779 |
| Slc23a3       | chr1:75125543-75133890   | 0.5481  | 0.5113  | -0.1001 | 0.812389 |
| A630095N17Rik | chr1:75220094-75232093   | 0.5946  | 0.9280  | 0.6422  | 0.370415 |
| Ptprn         | chr1:75247040-75264208   | 0.2623  | 0.3489  | 0.4114  | 0.206733 |
| Asic4         | chr1:75450435-75474343   | 0.1391  | 0.0829  | -0.7466 | 0.209795 |
| Tmem198       | chr1:75479531-75485705   | 0.6096  | 0.5687  | -0.1001 | 0.795769 |
| Ap1s3         | chr1:79606875-79671972   | 1.1902  | 1.3185  | 0.1477  | 0.346958 |
| Fam124b       | chr1:80198705-80218473   | 0.5267  | 0.6186  | 0.2320  | 0.288690 |
| Tm4sf20       | chr1:82756648-82768461   | 1.0826  | 0.9420  | -0.2007 | 0.556636 |
| Gm16026       | chr1:85266697-85285491   | 0.2048  | 0.2859  | 0.4813  | 0.097613 |
| Gpr55         | chr1:85939536-85961055   | 0.7471  | 1.0195  | 0.4486  | 0.247232 |
| Snora75       | chr1:86351168-86351301   | 11.0910 | 14.1657 | 0.3530  | 0.047520 |
| Snord82       | chr1:86356260-86356330   | 14.4928 | 24.2325 | 0.7416  | 0.048011 |
| Gm6136        | chr1:86908761-86909703   | 2.3002  | 1.9415  | -0.2446 | 0.562121 |
| Kcnj13        | chr1:87386362-87394729   | 2.2268  | 2.7761  | 0.3180  | 0.137006 |
| NA            | chr1:87796466-87796817   | 3.6210  | 4.0090  | 0.1468  | 0.732463 |
| Sh3bp4        | chr1:89070414-89155068   | 0.0847  | 0.0995  | 0.2332  | 0.635915 |
| Gm17090       | chr1:91305091-91321101   | 6.8010  | 7.5243  | 0.1458  | 0.516238 |
| Otos          | chr1:92644217-92648841   | 0.3384  | 0.3171  | -0.0939 | 0.861588 |
| Ankmy1        | chr1:92870128-92902906   | 0.4571  | 0.3490  | -0.3893 | 0.201514 |
| Gpr35         | chr1:92973118-92986391   | 0.1723  | 0.3923  | 1.1868  | 0.006092 |
| Pask          | chr1:93308769-93343482   | 0.3914  | 0.4026  | 0.0409  | 0.834397 |
| Gm17415       | chr1:93421681-93422488   | 0.8126  | 0.6584  | -0.3035 | 0.502384 |
| Gm3531        | chr1:97948900-97949389   | 5.4947  | 6.8546  | 0.3190  | 0.237090 |
| B230216N24Rik | chr1:98031115-98057680   | 0.3260  | 0.5005  | 0.6185  | 0.199806 |
| Gm3608        | chr1:105455970-105458829 | 0.5414  | 0.6554  | 0.2757  | 0.192672 |
| Gm22710       | chr1:118459140-118459265 | 14.9961 | 14.1966 | -0.0790 | 0.890478 |
| Epb4.1l5      | chr1:119545032-119649000 | 0.2338  | 0.2975  | 0.3474  | 0.051138 |
| Gm15392       | chr1:121489295-121493203 | 2.5667  | 2.0772  | -0.3053 | 0.016279 |
| Tmem163       | chr1:127486545-127678096 | 0.4209  | 0.5537  | 0.3957  | 0.274085 |
| Gm15790       | chr1:129796607-129797858 | 0.7330  | 0.6032  | -0.2810 | 0.399187 |
| AA986860      | chr1:130731975-130744621 | 0.2309  | 0.2059  | -0.1651 | 0.627906 |
| Faim3         | chr1:130865668-130880790 | 0.3370  | 0.4984  | 0.5648  | 0.471379 |
| Il10          | chr1:131019844-131024974 | 1.1540  | 4.2380  | 1.8767  | 0.247231 |
| Fam72a        | chr1:131527902-131539872 | 0.5399  | 0.5952  | 0.1407  | 0.718107 |
| Gm26892       | chr1:132036804-132067945 | 0.5787  | 0.9099  | 0.6530  | 0.013862 |
| Tmcc2         | chr1:132356314-132391281 | 0.3778  | 0.3332  | -0.1814 | 0.413651 |
| 6030442K20Rik | chr1:132466432-132477045 | 1.2022  | 1.5790  | 0.3933  | 0.085757 |
| Cntn2         | chr1:132509424-132542940 | 0.1090  | 0.1911  | 0.8107  | 0.170073 |
| Plekha6       | chr1:133246096-133303435 | 0.0992  | 0.1116  | 0.1698  | 0.524836 |
| Ppfia4        | chr1:134296782-134332928 | 0.1115  | 0.2078  | 0.8983  | 0.058321 |
| Gm10535       | chr1:135108960-135113378 | 0.7640  | 1.3012  | 0.7683  | 0.250134 |
| Gm26280       | chr1:135150665-135150766 | 3.9119  | 6.0016  | 0.6175  | 0.247302 |
| Gm15445       | chr1:135152962-135153806 | 2.3877  | 2.1549  | -0.1480 | 0.629586 |
| Gm4204        | chr1:135232044-135233404 | 0.4734  | 0.7571  | 0.6775  | 0.002194 |
| Nav1          | chr1:135434579-135585355 | 0.0939  | 0.1596  | 0.7648  | 0.104856 |
| Phlda3        | chr1:135766118-135769136 | 1.0281  | 0.4583  | -1.1656 | 0.056641 |
| Lad1          | chr1:135818597-135833341 | 0.8987  | 1.4146  | 0.6546  | 0.016219 |
| Gm15850       | chr1:136126177-136131183 | 0.4123  | 0.2920  | -0.4977 | 0.362109 |
| Gm26781       | chr1:136259406-136274406 | 1.8529  | 2.7473  | 0.5683  | 0.012385 |
| Klf14         | chr1:136467957-136531511 | 0.2990  | 0.3870  | 0.3724  | 0.417835 |
| Gm26598       | chr1:136622097-136624650 | 0.3781  | 0.3798  | 0.0065  | 0.990338 |
| Gm4258        | chr1:137898594-138000384 | 2.0595  | 2.4652  | 0.2594  | 0.056035 |
| NA            | chr1:137928169-137930273 | 0.3163  | 0.5705  | 0.8507  | 0.305212 |
| Gm26936       | chr1:137928388-137969240 | 1.3040  | 0.8346  | -0.6439 | 0.222483 |
| NA            | chr1:137932040-137933296 | 1.0644  | 2.2546  | 1.0828  | 0.041284 |
| A430106G13Rik | chr1:137966530-137969918 | 0.6784  | 0.7013  | 0.0478  | 0.784036 |

|                      |                          |         |         |         |          |
|----------------------|--------------------------|---------|---------|---------|----------|
| <i>Z310009B15Rik</i> | chr1:138851978-138856854 | 5.6356  | 5.6963  | 0.0155  | 0.961088 |
| <i>NA</i>            | chr1:138977656-138979240 | 4.2239  | 3.6319  | -0.2179 | 0.264360 |
| <i>Gm16304</i>       | chr1:139133890-139134665 | 2.3036  | 3.2595  | 0.5007  | 0.199683 |
| <i>Gm15443</i>       | chr1:149025227-149026047 | 2.1555  | 2.4537  | 0.1869  | 0.607684 |
| <i>Rgl1</i>          | chr1:152516758-152766351 | 0.2101  | 0.3152  | 0.5852  | 0.126989 |
| <i>Nmnat2</i>        | chr1:152955100-153119260 | 0.4760  | 0.5213  | 0.1312  | 0.596832 |
| <i>E330020D12Rik</i> | chr1:153404826-153408429 | 0.8076  | 0.8457  | 0.0665  | 0.867717 |
| <i>Shcbp1l</i>       | chr1:153425161-153452574 | 0.1690  | 0.2458  | 0.5411  | 0.325640 |
| <i>Rgs8</i>          | chr1:153653024-153697667 | 0.0557  | 0.1406  | 1.3369  | 0.318343 |
| <i>Teddm1a</i>       | chr1:153891645-153893060 | 0.5306  | 0.4524  | -0.2299 | 0.498833 |
| <i>BC034090</i>      | chr1:155212473-155232724 | 0.9444  | 0.6711  | -0.4928 | 0.044016 |
| <i>Axdnd1</i>        | chr1:156323508-156421159 | 0.1418  | 0.1258  | -0.1734 | 0.688782 |
| <i>Gm10031</i>       | chr1:156524091-156526659 | 1.2417  | 0.8981  | -0.4674 | 0.142974 |
| <i>Scarna3a</i>      | chr1:159340282-159340422 | 8.8581  | 12.1735 | 0.4587  | 0.301155 |
| <i>Mir1927</i>       | chr1:160295863-160295972 | 6.4617  | 6.3969  | -0.0145 | 0.964313 |
| <i>Serpinc1</i>      | chr1:160978605-161003010 | 0.3397  | 0.7174  | 1.0787  | 0.011755 |
| <i>Mir5117</i>       | chr1:161037355-161037439 | 25.2097 | 22.9073 | -0.1382 | 0.643003 |
| <i>Gm25789</i>       | chr1:161038307-161038383 | 49.1326 | 44.7182 | -0.1358 | 0.661112 |
| <i>Tnfsf4</i>        | chr1:161395408-161418410 | 0.5220  | 0.5021  | -0.0561 | 0.893610 |
| <i>Dnm3</i>          | chr1:161982452-162478034 | 0.0583  | 0.0742  | 0.3477  | 0.394699 |
| <i>Gm26685</i>       | chr1:164503306-164514882 | 2.0693  | 1.5929  | -0.3776 | 0.152904 |
| <i>Xcl1</i>          | chr1:164931643-164935527 | 0.7175  | 1.5217  | 1.0846  | 0.198611 |
| <i>Gm15853</i>       | chr1:166379838-166380493 | 3.4806  | 2.8902  | -0.2682 | 0.316860 |
| <i>Mgst3</i>         | chr1:167371965-167393841 | 2.9059  | 2.4268  | -0.2599 | 0.336644 |
| <i>Nuf2</i>          | chr1:169497933-169531464 | 0.9229  | 1.2764  | 0.4678  | 0.377241 |
| <i>Gm26620</i>       | chr1:170885064-170885881 | 3.6172  | 2.9237  | -0.3071 | 0.110236 |
| <i>Fcgr3</i>         | chr1:171051173-171064935 | 0.6252  | 0.7215  | 0.2067  | 0.680594 |
| <i>1700009P17Rik</i> | chr1:171113917-171126967 | 0.3524  | 0.2771  | -0.3469 | 0.455991 |
| <i>Fcer1g</i>        | chr1:171229571-171234365 | 1.6268  | 2.9381  | 0.8528  | 0.045493 |
| <i>Klhdc9</i>        | chr1:171358445-171360798 | 1.4897  | 1.7622  | 0.2424  | 0.141013 |
| <i>Pvrl4</i>         | chr1:171370098-171388598 | 0.3120  | 0.4201  | 0.4294  | 0.174933 |
| <i>NA</i>            | chr1:171419032-171420352 | 4.4284  | 4.5695  | 0.0453  | 0.797076 |
| <i>Gm24871</i>       | chr1:171503047-171503163 | 31.2568 | 34.5489 | 0.1445  | 0.766112 |
| <i>Cd244</i>         | chr1:171559192-171585318 | 0.2691  | 0.5768  | 1.1002  | 0.025865 |
| <i>Vangl2</i>        | chr1:172000959-172028444 | 0.4281  | 0.4541  | 0.0851  | 0.576416 |
| <i>Kcnj10</i>        | chr1:172341209-172374085 | 0.1966  | 0.1548  | -0.3448 | 0.038850 |
| <i>Igsf9</i>         | chr1:172481787-172498878 | 0.5603  | 0.6213  | 0.1492  | 0.537400 |
| <i>4933439K11Rik</i> | chr1:172538132-172558129 | 0.7998  | 0.8144  | 0.0260  | 0.870038 |
| <i>Dusp23</i>        | chr1:172630768-172632974 | 1.5562  | 1.4706  | -0.0816 | 0.744236 |
| <i>Ijfi204</i>       | chr1:173747292-173766876 | 0.7961  | 1.4408  | 0.8558  | 0.410622 |
| <i>Kmo</i>           | chr1:175620380-175662116 | 0.4078  | 0.8640  | 1.0833  | 0.005775 |
| <i>Exo1</i>          | chr1:175880777-175911396 | 0.4368  | 0.4049  | -0.1094 | 0.716149 |
| <i>B020018G12Rik</i> | chr1:175977776-175979114 | 0.9853  | 0.9261  | -0.0894 | 0.770654 |
| <i>Gm15423</i>       | chr1:176927998-176932711 | 0.6295  | 0.8034  | 0.3519  | 0.398506 |
| <i>Gm16585</i>       | chr1:177786855-177787465 | 2.4809  | 2.8587  | 0.2045  | 0.423951 |
| <i>NA</i>            | chr1:178256102-178257295 | 0.6752  | 0.5348  | -0.3363 | 0.352827 |
| <i>Gm15480</i>       | chr1:179538416-179538935 | 2.7096  | 2.8414  | 0.0685  | 0.875667 |
| <i>Gm1305</i>        | chr1:179695296-179745185 | 1.0908  | 1.0370  | -0.0729 | 0.769551 |
| <i>Cdc42bpa</i>      | chr1:179960471-180165603 | 0.0696  | 0.0924  | 0.4100  | 0.179001 |
| <i>Gm26004</i>       | chr1:181840452-181840568 | 8.1153  | 14.0422 | 0.7911  | 0.011585 |
| <i>Gm5533</i>        | chr1:181851573-181853189 | 1.0058  | 0.8144  | -0.3046 | 0.379357 |
| <i>Gm10517</i>       | chr1:182408618-182409020 | 2.2437  | 1.3000  | -0.7874 | 0.012930 |
| <i>Mir1981</i>       | chr1:184822406-184822488 | 12.0579 | 19.4364 | 0.6888  | 0.290231 |
| <i>Ptpn14</i>        | chr1:189728267-189876695 | 0.1689  | 0.1428  | -0.2417 | 0.475013 |
| <i>Gm23153</i>       | chr1:190482871-190483157 | 3.3219  | 2.9077  | -0.1921 | 0.633443 |
| <i>Vash2</i>         | chr1:190947647-190979296 | 0.4881  | 0.7267  | 0.5741  | 0.174453 |
| <i>Nsl1</i>          | chr1:191063011-191084558 | 0.6557  | 0.7720  | 0.2356  | 0.220269 |
| <i>Dtl</i>           | chr1:191537364-191575534 | 0.5005  | 0.7589  | 0.6007  | 0.234742 |
| <i>Nek2</i>          | chr1:191821443-191833050 | 0.7197  | 0.8347  | 0.2138  | 0.619304 |
| <i>Rd3</i>           | chr1:191977372-191988282 | 0.1769  | 0.2817  | 0.6708  | 0.306487 |
| <i>Gm26670</i>       | chr1:191986831-191990138 | 0.6092  | 0.7554  | 0.3105  | 0.461304 |
| <i>Gm10516</i>       | chr1:192136897-192151013 | 0.4494  | 0.3144  | -0.5153 | 0.274221 |
| <i>4930570N18Rik</i> | chr1:193203038-193226208 | 3.0612  | 4.7732  | 0.6409  | 0.183595 |
| <i>NA</i>            | chr1:193207749-193254474 | 4.9217  | 5.1183  | 0.0565  | 0.861026 |
| <i>G0s2</i>          | chr1:193272160-193273188 | 2.4979  | 2.4737  | -0.0140 | 0.941565 |
| <i>Lamb3</i>         | chr1:193301956-193343878 | 0.4896  | 0.6783  | 0.4703  | 0.122609 |
| <i>Gm16897</i>       | chr1:194955758-194976959 | 0.3471  | 0.4436  | 0.3538  | 0.409898 |
| <i>Mir29c</i>        | chr1:195037546-195037634 | 8.0611  | 6.6975  | -0.2674 | 0.327149 |
| <i>Bambi</i>         | chr18:3507956-3516404    | 0.1193  | 0.1505  | 0.3362  | 0.269742 |
| <i>Gm10557</i>       | chr18:4198215-4198969    | 1.5681  | 1.1900  | -0.3980 | 0.228156 |
| <i>Gm16147</i>       | chr18:5611557-5611836    | 3.9812  | 5.7018  | 0.5182  | 0.032866 |

|               |                         |         |         |         |          |
|---------------|-------------------------|---------|---------|---------|----------|
| Gm2531        | chr18:10145452-10145965 | 6.7206  | 6.4793  | -0.0528 | 0.717073 |
| Gm15956       | chr18:12193767-12198675 | 7.1561  | 7.1061  | -0.0101 | 0.974162 |
| Cabyr         | chr18:12741323-12755146 | 0.2621  | 0.3032  | 0.2100  | 0.685339 |
| Gm26407       | chr18:12961498-12961805 | 2.7045  | 2.2947  | -0.2371 | 0.669213 |
| Hrh4          | chr18:13006989-13022882 | 0.5842  | 0.5942  | 0.0244  | 0.966287 |
| Gm10036       | chr18:15832793-15833330 | 4.6226  | 4.3731  | -0.0801 | 0.752730 |
| Gm24959       | chr18:20844446-20844592 | 9.2768  | 7.9842  | -0.2165 | 0.486786 |
| Zscan30       | chr18:23970974-23981555 | 2.5907  | 2.7597  | 0.0912  | 0.775349 |
| Gm7701        | chr18:24257377-24258856 | 2.0847  | 2.2089  | 0.0835  | 0.794447 |
| Mocos         | chr18:24653690-24701556 | 0.6183  | 0.9815  | 0.6667  | 0.032980 |
| Gm26823       | chr18:31859081-31861764 | 0.7976  | 1.0922  | 0.4534  | 0.089212 |
| Gm23639       | chr18:33795163-33795295 | 11.1066 | 12.8811 | 0.2138  | 0.662454 |
| 4933408B17Rik | chr18:34579845-34597468 | 0.3866  | 0.5080  | 0.3938  | 0.341433 |
| Lrrtm2        | chr18:35209010-35215024 | 0.2074  | 0.2663  | 0.3605  | 0.392134 |
| Mir1949       | chr18:35554491-35554632 | 11.8934 | 16.7196 | 0.4914  | 0.205205 |
| Spata24       | chr18:35656689-35662186 | 1.4899  | 1.6781  | 0.1716  | 0.625441 |
| 1700066B19Rik | chr18:35703224-35730869 | 1.1400  | 1.1665  | 0.0331  | 0.929639 |
| Cxxc5         | chr18:35829817-35861687 | 1.2704  | 1.6191  | 0.3499  | 0.428622 |
| Psd2          | chr18:35964829-36014715 | 0.1908  | 0.2353  | 0.3026  | 0.533286 |
| Nrg2          | chr18:36017706-36197380 | 0.4388  | 0.5331  | 0.2809  | 0.414501 |
| Cystm1        | chr18:36345618-36402980 | 0.2563  | 0.2034  | -0.3337 | 0.366585 |
| Gm6542        | chr18:36609957-36610729 | 3.6050  | 4.4094  | 0.2906  | 0.188251 |
| Slc25a2       | chr18:37637377-37638723 | 1.6858  | 1.9873  | 0.2374  | 0.195694 |
| Arap3         | chr18:37972623-37997574 | 0.1939  | 0.2396  | 0.3052  | 0.467673 |
| 1700086O06Rik | chr18:38238404-38250565 | 1.6565  | 1.6925  | 0.0310  | 0.861454 |
| Gm10268       | chr18:38244827-38245382 | 1.4254  | 1.5101  | 0.0834  | 0.785365 |
| Gm23205       | chr18:38297938-38298041 | 7.6196  | 10.5727 | 0.4726  | 0.301658 |
| NA            | chr18:38467866-38467933 | 5.8970  | 8.1583  | 0.4683  | 0.296323 |
| Gm15336       | chr18:39246246-39302690 | 0.7648  | 1.0296  | 0.4289  | 0.326536 |
| Gm15337       | chr18:39367037-39389425 | 0.3604  | 0.4452  | 0.3050  | 0.349733 |
| Prelid2       | chr18:41875695-41951194 | 1.7866  | 3.5565  | 0.9932  | 0.052243 |
| Gm22697       | chr18:42301889-42301952 | 19.6863 | 20.1824 | 0.0359  | 0.943680 |
| Gpr151        | chr18:42578019-42579652 | 1.9699  | 1.8725  | -0.0732 | 0.679435 |
| Mcc           | chr18:44425060-44812182 | 0.2797  | 0.3137  | 0.1657  | 0.496278 |
| Trim36        | chr18:46165301-46212607 | 0.5587  | 0.6067  | 0.1188  | 0.499429 |
| Cdo1          | chr18:46713204-46728342 | 2.3984  | 1.9634  | -0.2887 | 0.265346 |
| Gm16283       | chr18:49755793-49757189 | 4.8883  | 3.7923  | -0.3663 | 0.105387 |
| Gm27026       | chr18:52472847-52473739 | 1.7194  | 1.8896  | 0.1362  | 0.743680 |
| Zfp608        | chr18:54888044-54990180 | 0.4157  | 0.5931  | 0.5127  | 0.050572 |
| Gm24514       | chr18:55622632-55622920 | 2.8822  | 3.2612  | 0.1782  | 0.708584 |
| March3        | chr18:56761715-56925548 | 0.2679  | 0.4243  | 0.6630  | 0.074307 |
| Fbn2          | chr18:58008622-58209926 | 0.0817  | 0.2699  | 1.7250  | 0.214061 |
| Gm5970        | chr18:60220842-60222058 | 1.6145  | 1.9032  | 0.2373  | 0.675478 |
| F830016B08Rik | chr18:60293379-60303016 | 0.5043  | 0.8581  | 0.7668  | 0.363393 |
| Smim3         | chr18:60474192-60501983 | 0.4418  | 0.7570  | 0.7769  | 0.113210 |
| Synpo         | chr18:60593972-60660142 | 0.2290  | 0.4904  | 1.0988  | 0.054955 |
| Gm8731        | chr18:60778982-60779394 | 3.0130  | 3.8247  | 0.3442  | 0.308869 |
| Mir5107       | chr18:60812075-60812163 | 14.4004 | 29.2518 | 1.0224  | 0.022783 |
| Pcyox1l       | chr18:61696836-61707635 | 0.7610  | 0.8538  | 0.1660  | 0.615963 |
| Gm9949        | chr18:62180125-62184405 | 1.5600  | 1.7494  | 0.1653  | 0.581288 |
| Alpk2         | chr18:65265528-65393888 | 0.1055  | 0.0994  | -0.0866 | 0.886851 |
| B430212C06Rik | chr18:67321208-67344103 | 0.4379  | 0.5819  | 0.4103  | 0.147286 |
| Cfap53        | chr18:74283089-74359986 | 0.3377  | 0.4578  | 0.4389  | 0.178864 |
| Myo5b         | chr18:74440935-74771493 | 0.1758  | 0.1646  | -0.0950 | 0.713942 |
| Scarna17      | chr18:74778390-74778469 | 21.9636 | 24.2230 | 0.1413  | 0.741095 |
| Snord58b      | chr18:75001057-75001123 | 8.0493  | 5.8798  | -0.4531 | 0.406010 |
| Gm23301       | chr18:75001454-75001519 | 34.5022 | 40.9407 | 0.2468  | 0.200010 |
| Gm26202       | chr18:75001879-75001944 | 26.2535 | 35.5445 | 0.4371  | 0.224744 |
| Gm20544       | chr18:75365331-75367088 | 3.1525  | 3.2742  | 0.0546  | 0.805537 |
| Ctif          | chr18:75431223-75697696 | 0.1291  | 0.1840  | 0.5111  | 0.390378 |
| Zfp516        | chr18:82910878-83005314 | 0.4491  | 0.4871  | 0.1172  | 0.624764 |
| Gm16146       | chr18:84858635-84859547 | 5.1184  | 3.7561  | -0.4465 | 0.069888 |
| Eif3s6-ps2    | chr18:90311824-90312043 | 17.0973 | 17.7050 | 0.0504  | 0.824136 |
| Cdnf          | chr2:3513029-3526376    | 0.8131  | 1.0246  | 0.3335  | 0.107586 |
| Gm13185       | chr2:3752985-3755177    | 2.0511  | 4.4231  | 1.1087  | 0.024620 |
| Mcm10         | chr2:4989713-5012791    | 0.3218  | 0.3016  | -0.0931 | 0.805929 |
| Optn          | chr2:5020641-5064051    | 0.2909  | 0.4237  | 0.5425  | 0.197754 |
| Gm13216       | chr2:5603570-5604161    | 1.0772  | 0.8735  | -0.3024 | 0.431427 |
| Gm26315       | chr2:7076093-7076414    | 9.5290  | 7.2176  | -0.4008 | 0.013993 |
| Gm13219       | chr2:9352430-9447676    | 0.0872  | 0.0843  | -0.0495 | 0.922722 |
| Gm13256       | chr2:9877255-9878869    | 4.7509  | 5.7643  | 0.2789  | 0.309426 |

|               |                        |         |         |         |          |
|---------------|------------------------|---------|---------|---------|----------|
| NA            | chr2:10047837-10049519 | 1.2471  | 1.5971  | 0.3568  | 0.202703 |
| Gm26491       | chr2:10475499-10475620 | 5.7116  | 3.1023  | -0.8806 | 0.287071 |
| Gm13293       | chr2:11339488-11342612 | 2.5214  | 2.5768  | 0.0314  | 0.890049 |
| Il2ra         | chr2:11642791-11693191 | 0.2583  | 0.4163  | 0.6883  | 0.005161 |
| Pter          | chr2:12924040-13003453 | 0.3055  | 0.3289  | 0.1063  | 0.801616 |
| Cubn          | chr2:13276337-13491924 | 0.1018  | 0.1427  | 0.4870  | 0.381631 |
| NA            | chr2:13557847-13560324 | 0.3584  | 0.4706  | 0.3929  | 0.281947 |
| Stamos        | chr2:14070331-14073934 | 0.7867  | 1.3312  | 0.7588  | 0.031618 |
| Cacnb2        | chr2:14604305-14987908 | 0.0669  | 0.0919  | 0.4578  | 0.467125 |
| Plxdc2        | chr2:16356303-16755839 | 0.1870  | 0.3077  | 0.7189  | 0.060872 |
| 4930426L09Rik | chr2:18998342-18999801 | 1.8682  | 2.1343  | 0.1921  | 0.449220 |
| Armc3         | chr2:19199301-19310241 | 1.2049  | 1.0820  | -0.1553 | 0.502718 |
| Gm13346       | chr2:19676710-19686157 | 0.3081  | 0.2091  | -0.5597 | 0.104452 |
| Gm13347       | chr2:19677250-19678603 | 0.8150  | 0.5613  | -0.5380 | 0.121428 |
| Gm13375       | chr2:20969053-20969997 | 0.4862  | 0.4393  | -0.1465 | 0.785076 |
| Gm13341       | chr2:22587290-22587962 | 0.9080  | 0.9878  | 0.1215  | 0.777735 |
| Gm13340       | chr2:22588102-22589647 | 1.2031  | 1.6410  | 0.4478  | 0.077785 |
| A130006I12Rik | chr2:22895320-22895736 | 2.5994  | 2.7262  | 0.0687  | 0.894213 |
| Gm14441       | chr2:22913292-22913832 | 0.8881  | 0.9460  | 0.0911  | 0.836415 |
| Gm13357       | chr2:23019130-23019667 | 2.3297  | 3.3548  | 0.5261  | 0.310939 |
| Gm13423       | chr2:23202032-23203683 | 2.5058  | 2.3646  | -0.0837 | 0.782948 |
| Il1rn         | chr2:24336852-24351494 | 0.0951  | 0.1478  | 0.6358  | 0.422133 |
| Gm13369       | chr2:24993356-24994343 | 0.9447  | 0.8736  | -0.1130 | 0.791052 |
| Gm22572       | chr2:25208622-25208727 | 7.3689  | 7.8165  | 0.0851  | 0.743887 |
| Fam166a       | chr2:25218744-25222280 | 2.8477  | 2.4601  | -0.2111 | 0.141407 |
| AA543186      | chr2:25327449-25332571 | 1.1542  | 0.9822  | -0.2329 | 0.526936 |
| Sapcd2        | chr2:25372320-25378213 | 0.2234  | 0.3893  | 0.8015  | 0.181012 |
| Fut7          | chr2:25423266-25426374 | 0.8013  | 0.9235  | 0.2046  | 0.754262 |
| C8g           | chr2:25498650-25501719 | 2.4604  | 1.9602  | -0.3279 | 0.123562 |
| Gm996         | chr2:25575415-25580099 | 0.2082  | 0.1863  | -0.1605 | 0.569379 |
| Gm26702       | chr2:25575430-25580099 | 0.2134  | 0.1910  | -0.1605 | 0.569379 |
| Tmem141       | chr2:25620066-25622005 | 1.3748  | 1.0284  | -0.4188 | 0.195196 |
| A230005M16Rik | chr2:25705849-25709716 | 0.4172  | 0.9159  | 1.1347  | 0.022599 |
| Bmyc          | chr2:25706878-25707717 | 2.0527  | 3.5530  | 0.7915  | 0.026652 |
| Gm13568       | chr2:26457143-26458316 | 6.6399  | 9.2701  | 0.4814  | 0.206365 |
| Egfl7         | chr2:26580013-26593120 | 0.4004  | 0.2629  | -0.0609 | 0.346187 |
| Gm20532       | chr2:26586638-26635634 | 1.4372  | 2.2876  | 0.6706  | 0.003876 |
| Snora43       | chr2:26637847-26637974 | 9.7496  | 7.5966  | -0.3600 | 0.425989 |
| Snora17       | chr2:26639189-26639321 | 15.5535 | 14.6189 | -0.0894 | 0.770510 |
| Lcn4          | chr2:26667673-26671282 | 4.1850  | 3.5131  | -0.2525 | 0.034321 |
| Gm23969       | chr2:26911260-26911334 | 13.5978 | 21.6048 | 0.6680  | 0.219616 |
| Gm22879       | chr2:26912230-26912287 | 14.6525 | 16.8736 | 0.2036  | 0.561741 |
| Gm24134       | chr2:26912529-26912600 | 29.5858 | 28.0576 | -0.0765 | 0.721538 |
| NA            | chr2:26912847-26912915 | 7.7943  | 16.9310 | 1.1192  | 0.011519 |
| Slc2a6        | chr2:27021362-27027998 | 0.8047  | 1.2284  | 0.6103  | 0.186286 |
| Adamsl2       | chr2:27079378-27108981 | 0.0730  | 0.0762  | 0.0620  | 0.919888 |
| Sardh         | chr2:27188392-27248337 | 0.6313  | 0.5759  | -0.1324 | 0.699695 |
| Sardhos       | chr2:27189381-27234710 | 4.2166  | 3.1712  | -0.4110 | 0.070824 |
| Gm25541       | chr2:27539804-27539930 | 6.2901  | 8.8090  | 0.4859  | 0.098553 |
| Gm13421       | chr2:27540425-27543362 | 1.5971  | 1.7248  | 0.1110  | 0.717876 |
| Rpsa-ps9      | chr2:28477165-28478050 | 3.0461  | 2.1842  | -0.4799 | 0.142999 |
| Gm13547       | chr2:29759311-29768998 | 0.3192  | 0.2642  | -0.2726 | 0.395310 |
| Coq4          | chr2:29787492-29797935 | 1.1834  | 1.0517  | -0.1702 | 0.207012 |
| Cercam        | chr2:29869163-29882840 | 0.1931  | 0.1947  | 0.0120  | 0.970091 |
| Gm23865       | chr2:29931426-29931523 | 24.9279 | 32.6337 | 0.3886  | 0.101667 |
| Wdr34         | chr2:30031545-30048881 | 0.8030  | 0.7631  | -0.0735 | 0.818464 |
| Pkn3          | chr2:30077683-30091022 | 0.4904  | 0.6341  | 0.3706  | 0.053657 |
| NA            | chr2:30237492-30238223 | 4.7944  | 3.4064  | -0.4931 | 0.009461 |
| Ier5l         | chr2:30472647-30474199 | 0.3508  | 0.6624  | 0.9173  | 0.270267 |
| Cstad         | chr2:30595039-30608943 | 1.0916  | 1.5391  | 0.4957  | 0.186139 |
| 9330198N18Rik | chr2:30629654-30689210 | 0.7973  | 1.1654  | 0.5476  | 0.091173 |
| 1700001O22Rik | chr2:30794768-30803661 | 0.1275  | 0.2569  | 1.0109  | 0.134263 |
| Gm13405       | chr2:31209469-31211347 | 0.9836  | 1.7972  | 0.8696  | 0.038865 |
| Ncs1          | chr2:31245822-31295989 | 0.0919  | 0.1003  | 0.1266  | 0.816693 |
| Hmcn2         | chr2:31314414-31460738 | 0.1128  | 0.0867  | -0.3796 | 0.086742 |
| Gm13427       | chr2:31676363-31688469 | 3.9652  | 3.0839  | -0.3626 | 0.047223 |
| Fibcd1        | chr2:31813289-31846005 | 0.2514  | 0.1905  | -0.3998 | 0.205950 |
| Gm13608       | chr2:31985058-31986464 | 1.7487  | 2.6190  | 0.5827  | 0.113739 |
| Gm13609       | chr2:32016643-32017344 | 5.5785  | 5.5006  | -0.0203 | 0.940336 |
| Dnm1          | chr2:32308470-32353329 | 0.1953  | 0.2308  | 0.2412  | 0.626632 |
| 9430097D07Rik | chr2:32574183-32575684 | 0.6259  | 0.8174  | 0.3851  | 0.106455 |

|                      |                        |         |         |         |          |
|----------------------|------------------------|---------|---------|---------|----------|
| <i>St6galnac6</i>    | chr2:32599708-32620806 | 0.5390  | 0.7004  | 0.3778  | 0.168216 |
| <i>Eng</i>           | chr2:32646594-32682669 | 0.2096  | 0.3581  | 0.7727  | 0.086061 |
| <i>Pthr1</i>         | chr2:32775785-32777597 | 1.9926  | 2.2066  | 0.1471  | 0.598241 |
| <i>1700019L03Rik</i> | chr2:32777380-32784428 | 0.7602  | 1.2433  | 0.7098  | 0.205162 |
| <i>Stxbp1</i>        | chr2:32787601-32847239 | 0.2471  | 0.3140  | 0.3456  | 0.463068 |
| <i>Fam129b</i>       | chr2:32876113-32925254 | 0.4041  | 0.4851  | 0.2634  | 0.464808 |
| <i>Gm13536</i>       | chr2:33446801-33449207 | 0.9495  | 0.4962  | -0.9362 | 0.105803 |
| <i>Gm13529</i>       | chr2:33652388-33652798 | 2.1547  | 1.5104  | -0.5126 | 0.288425 |
| <i>Pbx3</i>          | chr2:34171456-34373140 | 0.2118  | 0.2896  | 0.4509  | 0.405345 |
| <i>Phf19</i>         | chr2:34893756-34914026 | 0.6436  | 0.7020  | 0.1252  | 0.536596 |
| <i>AI182371</i>      | chr2:35084045-35101543 | 1.0020  | 1.2532  | 0.3228  | 0.310478 |
| <i>Stom</i>          | chr2:35313985-35336976 | 0.7327  | 0.9134  | 0.3180  | 0.359682 |
| <i>Gm13443</i>       | chr2:35340360-35341316 | 1.0023  | 1.0897  | 0.1206  | 0.728264 |
| <i>Dab2ip</i>        | chr2:35558265-35730994 | 0.1969  | 0.2716  | 0.4640  | 0.432431 |
| <i>Tll11</i>         | chr2:35751240-35979913 | 0.2564  | 0.1446  | -0.8269 | 0.011472 |
| <i>Crb2</i>          | chr2:37776248-37799103 | 0.0661  | 0.0997  | 0.5927  | 0.381936 |
| <i>Gm13588</i>       | chr2:38490103-38490238 | 8.5450  | 5.3982  | -0.6626 | 0.055419 |
| <i>Nek6</i>          | chr2:38511642-38588041 | 0.6378  | 0.7438  | 0.2220  | 0.406849 |
| <i>Gm16523</i>       | chr2:39161250-39161989 | 1.4900  | 1.3259  | -0.1684 | 0.622122 |
| <i>Gm13461</i>       | chr2:41987472-41988829 | 4.4258  | 3.2846  | -0.4302 | 0.026927 |
| <i>Zeb2</i>          | chr2:44983633-45117395 | 0.1099  | 0.2462  | 1.1634  | 0.059294 |
| <i>Cacnb4</i>        | chr2:52428319-52676831 | 0.1756  | 0.2279  | 0.3763  | 0.151948 |
| <i>Gm13548</i>       | chr2:52739070-52739455 | 2.6503  | 2.8288  | 0.0940  | 0.732698 |
| <i>Nr4a2</i>         | chr2:57106829-57124003 | 0.3234  | 0.4827  | 0.5777  | 0.214568 |
| <i>A930012O16Rik</i> | chr2:57236226-57238508 | 0.7639  | 0.9479  | 0.3112  | 0.382867 |
| <i>Gm13535</i>       | chr2:57272563-57275686 | 0.3381  | 0.1444  | -1.2277 | 0.176124 |
| <i>Acvr1c</i>        | chr2:58267452-58357895 | 0.1838  | 0.3152  | 0.7786  | 0.014457 |
| <i>Ccdc148</i>       | chr2:58821696-59160683 | 0.0859  | 0.0526  | -0.7089 | 0.276956 |
| <i>Gm13572</i>       | chr2:60037140-60038837 | 1.5932  | 1.9328  | 0.2788  | 0.455530 |
| <i>Gm13620</i>       | chr2:60125095-60125819 | 2.0859  | 1.8039  | -0.2096 | 0.653460 |
| <i>Slc4a10</i>       | chr2:62046461-62326730 | 0.4467  | 0.4945  | 0.1466  | 0.550701 |
| <i>Gm13561</i>       | chr2:62357070-62470913 | 1.4318  | 1.7624  | 0.2997  | 0.073991 |
| <i>Gm13565</i>       | chr2:62436879-62441142 | 0.7187  | 0.9477  | 0.3991  | 0.301181 |
| <i>Gca</i>           | chr2:62664284-62694109 | 0.1227  | 0.1458  | 0.2496  | 0.736901 |
| <i>Cobll1</i>        | chr2:65088338-65239403 | 0.2085  | 0.3701  | 0.8278  | 0.137696 |
| <i>Spc25</i>         | chr2:69193894-69206194 | 0.8225  | 1.1499  | 0.4834  | 0.141290 |
| <i>Abcb11</i>        | chr2:69238281-69342616 | 0.2714  | 0.3282  | 0.2745  | 0.090829 |
| <i>Gm13622</i>       | chr2:69737356-69737789 | 2.4170  | 2.9200  | 0.2727  | 0.386555 |
| <i>Ccdc173</i>       | chr2:69758032-69789575 | 1.2483  | 1.3176  | 0.0779  | 0.737312 |
| <i>Myo3b</i>         | chr2:70039125-70429198 | 0.1545  | 0.3989  | 1.3685  | 0.146754 |
| <i>Gm26558</i>       | chr2:70661247-70662108 | 5.1997  | 3.9236  | -0.4063 | 0.072644 |
| <i>Cybrd1</i>        | chr2:71117922-71142926 | 0.2824  | 0.3448  | 0.2879  | 0.284333 |
| <i>Dlx1as</i>        | chr2:71516453-71537891 | 0.5140  | 0.5265  | 0.0347  | 0.929496 |
| <i>Rapgef4os1</i>    | chr2:72097602-72148796 | 1.9058  | 2.1627  | 0.1824  | 0.716846 |
| <i>Rapgef4os3</i>    | chr2:72244964-72248975 | 0.9489  | 1.2023  | 0.3414  | 0.311552 |
| <i>Hspe1-ps5</i>     | chr2:72955897-72956194 | 8.3302  | 9.4742  | 0.1856  | 0.534327 |
| <i>Gm11084</i>       | chr2:72971547-72986716 | 13.9585 | 15.4056 | 0.1423  | 0.719500 |
| <i>Gm13709</i>       | chr2:73370908-73379297 | 2.2577  | 3.6026  | 0.6741  | 0.124967 |
| <i>Gm13707</i>       | chr2:73421908-73429142 | 1.2318  | 1.2008  | -0.0368 | 0.953868 |
| <i>Gm13708</i>       | chr2:73459704-73477602 | 6.7695  | 7.8497  | 0.2136  | 0.416506 |
| <i>Chn1os3</i>       | chr2:73596525-73616012 | 0.2037  | 0.6374  | 1.6456  | 0.187656 |
| <i>Gm10822</i>       | chr2:73892995-73900850 | 0.4040  | 0.4228  | 0.0657  | 0.845546 |
| <i>Gm14425</i>       | chr2:74855705-74856311 | 1.5954  | 1.0919  | -0.5471 | 0.028078 |
| <i>Gm24996</i>       | chr2:75686739-75686838 | 7.7236  | 4.4954  | -0.7808 | 0.002802 |
| <i>Ttc30b</i>        | chr2:75935862-75938462 | 0.7955  | 1.0165  | 0.3538  | 0.304222 |
| <i>Ttc30a1</i>       | chr2:75979105-75981967 | 0.9703  | 0.8561  | -0.1805 | 0.520107 |
| <i>Fkbp7</i>         | chr2:76663043-76673116 | 0.7753  | 1.1179  | 0.5279  | 0.028096 |
| <i>Gm13938</i>       | chr2:76722775-76786708 | 2.2567  | 5.1927  | 1.2023  | 0.169781 |
| <i>Gm13651</i>       | chr2:77291330-77292440 | 0.3702  | 0.4938  | 0.4159  | 0.543415 |
| <i>Gm13680</i>       | chr2:83353156-83353949 | 2.1253  | 1.9874  | -0.0968 | 0.741302 |
| <i>Gm13684</i>       | chr2:83737781-83759865 | 0.5573  | 1.1254  | 1.0140  | 0.044676 |
| <i>Tfpi</i>          | chr2:84432854-84476775 | 0.3252  | 0.4940  | 0.6029  | 0.188770 |
| <i>Ube2l6</i>        | chr2:84798827-84810335 | 1.0990  | 2.0030  | 0.8659  | 0.204762 |
| <i>Slc43a1</i>       | chr2:84838849-84863594 | 0.3044  | 0.3468  | 0.1878  | 0.647726 |
| <i>Slc43a3</i>       | chr2:84936578-84958509 | 0.7167  | 1.0560  | 0.5591  | 0.035672 |
| <i>P2rx3</i>         | chr2:84998582-85037462 | 0.9927  | 1.0407  | 0.0681  | 0.676923 |
| <i>Gm1826</i>        | chr2:87393482-87394644 | 1.5382  | 1.5731  | 0.0324  | 0.882362 |
| <i>Rpl30-ps3</i>     | chr2:90747615-90747963 | 8.0657  | 9.4887  | 0.2344  | 0.358391 |
| <i>C1qtnf4</i>       | chr2:90885859-90890525 | 0.8831  | 0.6134  | -0.5258 | 0.197470 |
| <i>Gm17661</i>       | chr2:90917642-90917914 | 3.3356  | 5.3339  | 0.6772  | 0.030750 |
| <i>Rapsn</i>         | chr2:91035619-91045729 | 0.3488  | 0.1764  | -0.9831 | 0.119084 |



|               |                          |         |         |         |          |
|---------------|--------------------------|---------|---------|---------|----------|
| Gm13778       | chr2:91044091-91053933   | 0.6845  | 0.4002  | -0.7744 | 0.310543 |
| Spi1          | chr2:91082389-91115756   | 0.4118  | 0.6866  | 0.7374  | 0.070552 |
| Mybpc3        | chr2:91118143-91136516   | 0.7631  | 0.9103  | 0.2545  | 0.352210 |
| Nr1h3         | chr2:91184060-91202834   | 0.9932  | 0.7542  | -0.3971 | 0.040447 |
| Gm13783       | chr2:91195905-91202778   | 0.9090  | 1.2547  | 0.4650  | 0.330756 |
| A330069E16Rik | chr2:91237145-91238352   | 0.8866  | 1.2348  | 0.4779  | 0.275505 |
| Lrp4          | chr2:91457510-91513779   | 0.0874  | 0.0760  | -0.2004 | 0.577143 |
| Gm13771       | chr2:91641684-91641922   | 2.4390  | 2.7108  | 0.1524  | 0.722628 |
| Gm13776       | chr2:91716158-91717419   | 0.8096  | 0.8619  | 0.0903  | 0.779343 |
| Chrm4         | chr2:91922188-91929829   | 0.3966  | 0.5703  | 0.5240  | 0.193604 |
| Mdk           | chr2:91929804-91932297   | 2.5066  | 2.6877  | 0.1007  | 0.623259 |
| Gm13786       | chr2:92233104-92233437   | 5.5353  | 7.0744  | 0.3539  | 0.042437 |
| Gm13785       | chr2:92312153-92312843   | 1.5777  | 1.8311  | 0.2149  | 0.385892 |
| Gylt1b        | chr2:92365045-92374869   | 0.1934  | 0.1857  | -0.0583 | 0.872438 |
| 1700029I15Rik | chr2:92382917-92385708   | 2.5078  | 2.6619  | 0.0860  | 0.758652 |
| Mapk8ip1      | chr2:92383675-92401263   | 0.5958  | 0.5801  | -0.0387 | 0.914224 |
| D930015M05Rik | chr2:92408891-92432308   | 1.7667  | 2.0642  | 0.2245  | 0.357646 |
| 4631405J19Rik | chr2:93027955-93044732   | 0.4062  | 0.6664  | 0.7143  | 0.013297 |
| Tspan18       | chr2:93201759-93334505   | 0.1534  | 0.2036  | 0.4090  | 0.343694 |
| 4921507L20Rik | chr2:93980033-93983575   | 1.2671  | 1.7395  | 0.4571  | 0.002692 |
| Prr5l         | chr2:101714284-101883027 | 0.4416  | 0.6102  | 0.4664  | 0.074174 |
| Ldlrad3       | chr2:101950202-102186385 | 0.0981  | 0.1174  | 0.2594  | 0.481891 |
| Gm13919       | chr2:102039628-102066725 | 1.7997  | 1.2661  | -0.5074 | 0.046520 |
| Ehf           | chr2:103263432-103303278 | 0.1161  | 0.1872  | 0.6887  | 0.070351 |
| 4931422A03Rik | chr2:103966942-104028361 | 1.7052  | 1.7462  | 0.0343  | 0.821289 |
| Gm10912       | chr2:104065825-104067486 | 0.4227  | 0.6061  | 0.5199  | 0.252418 |
| Mir1902       | chr2:104428860-104428940 | 16.6522 | 18.5796 | 0.1580  | 0.600753 |
| Tcp11l1       | chr2:104657287-104712169 | 0.0668  | 0.0922  | 0.4660  | 0.419920 |
| Pax6          | chr2:105668895-105698410 | 0.0876  | 0.1185  | 0.4348  | 0.158700 |
| Gm13910       | chr2:108948779-108950727 | 1.9408  | 1.8680  | -0.0552 | 0.227124 |
| Gm13939       | chr2:109902395-109913319 | 1.2674  | 1.8164  | 0.5193  | 0.043519 |
| Gm13961       | chr2:111182634-111187406 | 0.1148  | 0.0656  | -0.8073 | 0.155966 |
| Gm13940       | chr2:112389196-112389497 | 2.8802  | 2.8583  | -0.0110 | 0.978229 |
| n-R5s202      | chr2:112469252-112469366 | 8.2511  | 11.6206 | 0.4940  | 0.109097 |
| BC052040      | chr2:115581715-115778768 | 0.7452  | 0.9955  | 0.4179  | 0.001701 |
| Thbs1         | chr2:118111875-118127133 | 0.1156  | 0.1137  | -0.0236 | 0.956114 |
| A430105I19Rik | chr2:118754157-118762661 | 0.1223  | 0.1800  | 0.5570  | 0.047378 |
| Gm14091       | chr2:118829873-118834122 | 2.4485  | 2.5115  | 0.0366  | 0.895781 |
| Chst14        | chr2:118926496-118928585 | 1.4310  | 1.8288  | 0.3539  | 0.259919 |
| Gm14137       | chr2:119174508-119177575 | 0.9462  | 1.0971  | 0.2135  | 0.474013 |
| Spint1        | chr2:119237361-119249527 | 0.2439  | 0.5309  | 1.1223  | 0.062584 |
| Oip5          | chr2:119609511-119618469 | 1.3105  | 1.2648  | -0.0512 | 0.773370 |
| Gm13999       | chr2:120024806-120027453 | 2.0227  | 1.8605  | -0.1207 | 0.680023 |
| Pla2g4f       | chr2:120299956-120314165 | 0.2307  | 0.1682  | -0.4560 | 0.327694 |
| Epb4.2        | chr2:121017890-121037072 | 0.0954  | 0.1380  | 0.5322  | 0.247918 |
| Strc          | chr2:121363727-121387168 | 0.2474  | 0.1915  | -0.3695 | 0.606635 |
| Catsper2      | chr2:121392630-121413792 | 0.9458  | 1.1741  | 0.3120  | 0.004129 |
| Ell3          | chr2:121439009-121444278 | 0.4124  | 0.6275  | 0.6056  | 0.188830 |
| Gm22953       | chr2:121450669-121450770 | 42.0281 | 33.6566 | -0.3205 | 0.145937 |
| Gm14018       | chr2:121485431-121491512 | 2.2208  | 1.1975  | -0.8910 | 0.004237 |
| Patl2         | chr2:122120107-122186189 | 0.2257  | 0.1823  | -0.3078 | 0.562430 |
| Sord          | chr2:122234748-122265340 | 1.4395  | 1.4080  | -0.0319 | 0.910891 |
| Duox1         | chr2:122315671-122347972 | 0.1962  | 0.1905  | -0.0430 | 0.875217 |
| Gm14086       | chr2:122427193-122427469 | 16.2753 | 14.4980 | -0.1668 | 0.472415 |
| 4930417H01Rik | chr2:122702046-122721456 | 1.3528  | 1.2563  | -0.1068 | 0.629524 |
| Bloc1s6os     | chr2:122733289-122738362 | 1.2229  | 1.2121  | -0.0127 | 0.976210 |
| Fam227b       | chr2:125983482-126152004 | 0.5363  | 0.4816  | -0.1552 | 0.655508 |
| Hdc           | chr2:126593666-126619299 | 0.2565  | 0.3276  | 0.3528  | 0.134020 |
| Usp50         | chr2:126709095-126783458 | 0.5768  | 0.6588  | 0.1919  | 0.593037 |
| Gm14212       | chr2:126864502-126865328 | 3.0290  | 2.4300  | -0.3179 | 0.274901 |
| 1810024B03Rik | chr2:127186354-127208280 | 0.8897  | 0.9286  | 0.0618  | 0.827239 |
| Astl          | chr2:127338638-127357651 | 0.4494  | 0.5274  | 0.2308  | 0.410534 |
| Gpat2         | chr2:127425198-127436092 | 1.3412  | 1.3691  | 0.0297  | 0.900452 |
| Bub1          | chr2:127801121-127831865 | 0.6108  | 0.8369  | 0.4544  | 0.380781 |
| Acox1         | chr2:127838875-128123873 | 1.1142  | 1.0755  | -0.0511 | 0.904168 |
| AI847159      | chr2:129158665-129180667 | 1.1779  | 1.4586  | 0.3083  | 0.289560 |
| Gm14026       | chr2:129168699-129170488 | 1.8160  | 1.4718  | -0.3032 | 0.094477 |
| Ckap2l        | chr2:129268209-129297212 | 0.7268  | 1.1787  | 0.6976  | 0.058446 |
| Il1b          | chr2:129364569-129371139 | 0.6973  | 1.0961  | 0.6525  | 0.181683 |
| Gm24451       | chr2:130276236-130276369 | 10.0865 | 10.4671 | 0.0534  | 0.721440 |
| Gm23187       | chr2:130277194-130277280 | 27.2487 | 31.5106 | 0.2096  | 0.566840 |

|               |                          |         |         |         |          |
|---------------|--------------------------|---------|---------|---------|----------|
| Gm23650       | chr2:130277696-130277766 | 13.5509 | 21.7251 | 0.6810  | 0.042721 |
| Snord57       | chr2:130278015-130278087 | 13.2338 | 20.1174 | 0.6042  | 0.043515 |
| Lzts3         | chr2:130632838-130642803 | 0.5680  | 0.6227  | 0.1325  | 0.575929 |
| Slc4a11       | chr2:130684112-130697519 | 0.3941  | 0.2708  | -0.5414 | 0.204092 |
| Gm14048       | chr2:130880865-130882133 | 2.4738  | 2.9195  | 0.2390  | 0.243230 |
| Gfra4         | chr2:131039631-131043088 | 0.1566  | 0.4040  | 1.3670  | 0.084701 |
| Hspa12b       | chr2:131127279-131146321 | 0.1858  | 0.2478  | 0.4156  | 0.331286 |
| Gm14232       | chr2:131159536-131171342 | 1.6410  | 1.0596  | -0.6311 | 0.220432 |
| AV099323      | chr2:132253356-132261333 | 1.0362  | 1.0393  | 0.0042  | 0.988896 |
| Gm14097       | chr2:132694431-132698523 | 1.9673  | 3.3097  | 0.7505  | 0.039078 |
| Mcm8          | chr2:132816140-132844197 | 0.7314  | 0.8565  | 0.2277  | 0.310165 |
| MacroD2       | chr2:140395308-142392966 | 0.0672  | 0.0583  | -0.2052 | 0.615950 |
| Klf16bos      | chr2:142902964-142903572 | 2.4649  | 1.0155  | -1.2793 | 0.069361 |
| Gm11688       | chr2:144261233-144261541 | 6.7270  | 6.6725  | -0.0117 | 0.948428 |
| Gm11701       | chr2:144364126-144365627 | 0.6668  | 0.6346  | -0.0712 | 0.832521 |
| Gm11743       | chr2:144756328-144758582 | 0.6643  | 0.6508  | -0.0296 | 0.935517 |
| Rin2          | chr2:145784733-145887616 | 0.2070  | 0.5518  | 1.4147  | 0.005508 |
| A930019D19Rik | chr2:146259285-146267160 | 0.6162  | 1.2854  | 1.0607  | 0.004580 |
| Cd93          | chr2:148436639-148443563 | 0.0537  | 0.0808  | 0.5911  | 0.310134 |
| Napb          | chr2:148693984-148732467 | 0.3275  | 0.4175  | 0.3505  | 0.186681 |
| Zfp937        | chr2:150218072-150240725 | 0.7312  | 1.1624  | 0.6689  | 0.021231 |
| Gm14125       | chr2:150305527-150306516 | 1.1138  | 1.1284  | 0.0189  | 0.944286 |
| Gm10130       | chr2:150323701-150363071 | 10.6033 | 11.2924 | 0.0908  | 0.596494 |
| Zfp442        | chr2:150407140-150451486 | 0.8612  | 1.0915  | 0.3419  | 0.194059 |
| Gm14123       | chr2:150606232-150610254 | 0.9919  | 0.9673  | -0.0363 | 0.836708 |
| Gm26681       | chr2:150748280-150750762 | 2.2141  | 2.3301  | 0.0737  | 0.773910 |
| Gins1         | chr2:150905399-150931280 | 1.5595  | 1.3695  | -0.1874 | 0.330815 |
| Gm14167       | chr2:151540730-151542348 | 2.1928  | 2.5821  | 0.2357  | 0.165050 |
| Fam110a       | chr2:151969397-151980219 | 1.9684  | 1.6322  | -0.2702 | 0.258830 |
| Srxn1         | chr2:152105515-152111376 | 0.2820  | 0.5279  | 0.9047  | 0.411165 |
| Gm14165       | chr2:152353614-152354566 | 0.8325  | 0.6538  | -0.3485 | 0.395304 |
| Zcchc3        | chr2:152411955-152415044 | 0.2787  | 0.1745  | -0.6758 | 0.154309 |
| Id1           | chr2:152736250-152737410 | 0.5073  | 0.3027  | -0.7450 | 0.089158 |
| Ttll9         | chr2:152962484-153008482 | 0.5956  | 0.6216  | 0.0616  | 0.781012 |
| Hck           | chr2:153108467-153151441 | 0.7135  | 1.0755  | 0.5922  | 0.037837 |
| Nol4l         | chr2:153407461-153529971 | 0.3681  | 0.4621  | 0.3281  | 0.173969 |
| Gm14494       | chr2:153826052-153826834 | 2.7765  | 2.2488  | -0.3041 | 0.254035 |
| Necab3        | chr2:154544398-154558890 | 0.3612  | 0.2923  | -0.3051 | 0.197886 |
| E2f1          | chr2:154559406-154569892 | 0.6428  | 0.8269  | 0.3634  | 0.137672 |
| Rpl5-ps2      | chr2:154703808-154704699 | 1.8471  | 2.1580  | 0.2245  | 0.386431 |
| Gm14227       | chr2:155198631-155199260 | 1.5616  | 1.3798  | -0.1785 | 0.627810 |
| Map1lc3a      | chr2:155276296-155278073 | 2.1753  | 2.1405  | -0.0233 | 0.879122 |
| Gm14239       | chr2:155459500-155460892 | 3.0621  | 3.8351  | 0.3247  | 0.094223 |
| Gm20637       | chr2:155546384-155546846 | 0.5395  | 0.4895  | -0.1401 | 0.891563 |
| Myh7b         | chr2:155611211-155634307 | 0.4443  | 0.5716  | 0.3636  | 0.035826 |
| Spag4         | chr2:156065174-156070617 | 0.2365  | 0.1874  | -0.3357 | 0.343862 |
| Gm14252       | chr2:156332316-156339381 | 0.3278  | 0.4549  | 0.4725  | 0.036255 |
| Gm14253       | chr2:156346803-156347997 | 1.8654  | 2.1796  | 0.2246  | 0.073291 |
| Gm14168       | chr2:156571791-156577457 | 0.8639  | 0.8974  | 0.0549  | 0.864430 |
| 4930405A21Rik | chr2:156714539-156720909 | 0.5864  | 0.6955  | 0.2460  | 0.516569 |
| Gm14231       | chr2:156789809-156790403 | 1.3252  | 1.1178  | -0.2455 | 0.408587 |
| Gm14230       | chr2:156833048-156839892 | 3.3578  | 2.8563  | -0.2334 | 0.203272 |
| Gm14276       | chr2:156994234-156994891 | 1.7060  | 2.0661  | 0.2763  | 0.266554 |
| NA            | chr2:157133905-157133972 | 10.4754 | 14.2261 | 0.4415  | 0.083439 |
| Mroh8         | chr2:157208549-157279549 | 0.5721  | 0.5115  | -0.1616 | 0.378276 |
| Src           | chr2:157418443-157471862 | 0.1404  | 0.2148  | 0.6131  | 0.246058 |
| Nnat          | chr2:157560077-157562522 | 1.1518  | 1.2649  | 0.1350  | 0.749748 |
| 2410019O14Rik | chr2:157595582-157597320 | 0.6997  | 0.7252  | 0.0518  | 0.960038 |
| Gm20412       | chr2:158117153-158117905 | 1.5720  | 2.3088  | 0.5546  | 0.118049 |
| Lbp           | chr2:158306492-158332852 | 0.5231  | 0.3538  | -0.5641 | 0.260774 |
| Gm26003       | chr2:158358359-158358472 | 9.6276  | 7.2882  | -0.4016 | 0.431372 |
| Gm23925       | chr2:158359797-158359929 | 30.5569 | 25.7547 | -0.2467 | 0.256160 |
| Gm11447       | chr2:160845612-160846470 | 0.4388  | 0.7685  | 0.8086  | 0.218987 |
| Lpin3         | chr2:160880669-160906002 | 0.1395  | 0.1385  | -0.0101 | 0.989436 |
| Mybl2         | chr2:163054686-163084688 | 0.3526  | 0.4709  | 0.4176  | 0.270245 |
| Tox2          | chr2:163203124-163324170 | 0.2409  | 0.4641  | 0.9458  | 0.264558 |
| 0610039K10Rik | chr2:163644849-163645800 | 3.1568  | 3.4043  | 0.1089  | 0.706763 |
| Pkig          | chr2:163658385-163726158 | 0.4369  | 0.4552  | 0.0594  | 0.813284 |
| Pabpc1l       | chr2:164025449-164050538 | 0.3895  | 0.6017  | 0.6274  | 0.024532 |
| Gm11455       | chr2:164135702-164140419 | 1.6234  | 1.8104  | 0.1573  | 0.642376 |
| Slpi          | chr2:164354069-164389095 | 0.9263  | 1.0386  | 0.1652  | 0.536561 |

|                      |                          |         |         |         |          |
|----------------------|--------------------------|---------|---------|---------|----------|
| <i>Sdc4</i>          | chr2:164424246-164443887 | 0.2411  | 0.3659  | 0.6017  | 0.397955 |
| <i>Trp53tg5</i>      | chr2:164470300-164473724 | 2.2409  | 2.1717  | -0.0452 | 0.863311 |
| <i>Gm22596</i>       | chr2:164761658-164761974 | 2.4413  | 3.9148  | 0.6813  | 0.157663 |
| <i>Ube2c</i>         | chr2:164769897-164778822 | 0.6499  | 1.0303  | 0.6647  | 0.208144 |
| <i>Spata25</i>       | chr2:164826388-164828537 | 0.8250  | 1.0321  | 0.3231  | 0.338941 |
| <i>Neurl2</i>        | chr2:164830731-164833456 | 1.9054  | 1.8276  | -0.0601 | 0.774090 |
| <i>Slc12a5</i>       | chr2:164960815-164999727 | 0.1453  | 0.2042  | 0.4904  | 0.147740 |
| <i>BC046401</i>      | chr2:165857683-165859034 | 1.7535  | 2.6048  | 0.5709  | 0.021935 |
| <i>Gm17096</i>       | chr2:166943538-166944308 | 4.5275  | 4.2509  | -0.0910 | 0.624626 |
| <i>Gm25878</i>       | chr2:167063472-167063565 | 23.9891 | 20.9821 | -0.1932 | 0.422829 |
| <i>Gm23201</i>       | chr2:167064997-167065086 | 40.0290 | 39.7242 | -0.1110 | 0.947511 |
| <i>Snord12</i>       | chr2:167065275-167065365 | 34.9783 | 38.8552 | 0.1516  | 0.628520 |
| <i>Gm11472</i>       | chr2:167087183-167087739 | 1.0673  | 1.1515  | 0.1095  | 0.812048 |
| <i>Kcnb1</i>         | chr2:167103377-167190155 | 0.3322  | 0.2945  | -0.1736 | 0.638639 |
| <i>Gm11476</i>       | chr2:167553313-167607845 | 0.5164  | 0.4128  | -0.3232 | 0.558124 |
| <i>Gm22355</i>       | chr2:167644363-167644459 | 2.9756  | 2.3469  | -0.3424 | 0.693170 |
| <i>Gm14320</i>       | chr2:167662108-167667697 | 1.3984  | 1.4619  | 0.0640  | 0.827172 |
| <i>9230111E07Rik</i> | chr2:167782052-167783486 | 4.3776  | 4.4614  | 0.0274  | 0.879154 |
| <i>Tshz2</i>         | chr2:169633012-170071816 | 0.0663  | 0.2494  | 1.9109  | 0.064768 |
| <i>Gm26883</i>       | chr2:169633645-169888503 | 0.0939  | 0.3700  | 1.9784  | 0.055326 |
| <i>Bcas1</i>         | chr2:170346990-170427845 | 0.2052  | 0.1488  | -0.4638 | 0.411039 |
| <i>Gm14269</i>       | chr2:170463513-170463819 | 6.9239  | 8.2926  | 0.2602  | 0.290673 |
| <i>Gm16796</i>       | chr2:170499356-170511927 | 0.2394  | 0.2691  | 0.1686  | 0.751797 |
| <i>Gm14455</i>       | chr2:172425803-172440560 | 0.8797  | 0.9608  | 0.1272  | 0.622212 |
| <i>Fam209</i>        | chr2:172472519-172474331 | 3.6479  | 3.2078  | -0.1855 | 0.448367 |
| <i>Nespas</i>        | chr2:174281236-174295436 | 0.5487  | 0.6956  | 0.3421  | 0.446098 |
| <i>Vmn1r-ps1</i>     | chr2:174591229-174591802 | 0.8211  | 1.5373  | 0.9049  | 0.046635 |
| <i>Gm14399</i>       | chr2:175129492-175142012 | 0.9453  | 0.6951  | -0.4435 | 0.069048 |
| <i>Gm14305</i>       | chr2:176708327-176721813 | 1.5583  | 1.3485  | -0.2087 | 0.174175 |
| <i>Gm14403</i>       | chr2:177498214-177509763 | 0.8897  | 0.8142  | -0.1280 | 0.817936 |
| <i>Gm14326</i>       | chr2:177935992-177957297 | 1.0320  | 1.2202  | 0.2418  | 0.237751 |
| <i>Gm26869</i>       | chr2:178023807-178028736 | 0.3879  | 0.4857  | 0.3244  | 0.187250 |
| <i>Gm14292</i>       | chr2:179177424-179177880 | 3.0912  | 3.7330  | 0.2722  | 0.434091 |
| <i>Lama5</i>         | chr2:180176372-180225859 | 0.2228  | 0.1905  | -0.2260 | 0.479087 |
| <i>Mir3091</i>       | chr2:180257535-180257611 | 11.9996 | 11.0415 | -0.1200 | 0.671637 |
| <i>Slca4a1</i>       | chr2:180456244-180474867 | 0.3691  | 0.2875  | -0.3603 | 0.251195 |
| <i>Gm14341</i>       | chr2:180954463-180966812 | 1.7973  | 1.4511  | -0.3086 | 0.427262 |
| <i>Srms</i>          | chr2:181205561-181213185 | 0.3694  | 0.3217  | -0.1996 | 0.502788 |
| <i>C030034L19Rik</i> | chr3:9403063-9437233     | 0.2967  | 0.6234  | 1.0710  | 0.189644 |
| <i>Gm16337</i>       | chr3:9757606-9786142     | 1.5151  | 1.7755  | 0.2288  | 0.567249 |
| <i>Gm24786</i>       | chr3:9829619-9829728     | 19.7667 | 20.0066 | 0.0174  | 0.955899 |
| <i>Fabp5</i>         | chr3:10012547-10016607   | 0.7157  | 0.8061  | 0.1717  | 0.515600 |
| <i>Gm9833</i>        | chr3:10088172-10092564   | 0.3094  | 0.2442  | -0.3412 | 0.479290 |
| <i>Gm17119</i>       | chr3:14564401-14564681   | 5.1030  | 5.4854  | 0.1043  | 0.739589 |
| <i>Cpa3</i>          | chr3:20215616-20242181   | 0.8253  | 0.6589  | -0.3248 | 0.427717 |
| <i>Gm7488</i>        | chr3:21049444-21050525   | 0.3833  | 0.4693  | 0.2921  | 0.583152 |
| <i>Fndc3b</i>        | chr3:27416161-27710439   | 0.1331  | 0.2105  | 0.6621  | 0.250026 |
| <i>4933429H19Rik</i> | chr3:30793137-30793560   | 1.8001  | 1.3393  | -0.4266 | 0.265450 |
| <i>Gm7741</i>        | chr3:35863876-35864865   | 1.2174  | 1.3145  | 0.1107  | 0.624015 |
| <i>Gm15952</i>       | chr3:35933044-35942717   | 1.0076  | 1.3729  | 0.4462  | 0.102604 |
| <i>Mccc1os</i>       | chr3:35999832-36025106   | 0.5243  | 0.4840  | -0.1154 | 0.321351 |
| <i>1810062G17Rik</i> | chr3:36475936-36482299   | 1.7152  | 1.5190  | -0.1753 | 0.557185 |
| <i>Bbs7</i>          | chr3:36573141-36613477   | 0.2821  | 0.3506  | 0.3135  | 0.500553 |
| <i>Gm12534</i>       | chr3:37231332-37232469   | 2.1884  | 5.6846  | 1.3772  | 0.215711 |
| <i>Gm7799</i>        | chr3:37959611-37960087   | 0.8280  | 1.2994  | 0.6502  | 0.306431 |
| <i>Gm9845</i>        | chr3:39357393-39359128   | 0.6978  | 0.5006  | -0.4790 | 0.108126 |
| <i>Intu</i>          | chr3:40531285-40704774   | 0.3189  | 0.3095  | -0.0432 | 0.870970 |
| <i>1700034I23Rik</i> | chr3:40900199-40902501   | 0.4403  | 0.5517  | 0.3254  | 0.283969 |
| <i>Larp1b</i>        | chr3:41021938-41040234   | 0.1445  | 0.1746  | 0.2728  | 0.522633 |
| <i>4930577N17Rik</i> | chr3:51277570-51279805   | 1.8813  | 1.6839  | -0.1599 | 0.695435 |
| <i>P2ry14</i>        | chr3:59114625-59130624   | 1.9398  | 2.2085  | 0.1871  | 0.422370 |
| <i>Gm5538</i>        | chr3:59729785-59752397   | 0.8246  | 1.0980  | 0.4132  | 0.252955 |
| <i>P2ry1</i>         | chr3:61002794-61008979   | 0.2043  | 0.2567  | 0.3294  | 0.150837 |
| <i>Arhgef26</i>      | chr3:62338343-62462221   | 0.4412  | 0.4909  | 0.1542  | 0.529641 |
| <i>Kcnab1</i>        | chr3:65109383-65378223   | 0.3845  | 0.4028  | 0.0669  | 0.722176 |
| <i>4931440P22Rik</i> | chr3:65507256-65529379   | 0.6449  | 0.6363  | -0.0192 | 0.924482 |
| <i>Gm20689</i>       | chr3:68900170-68900449   | 4.0825  | 4.5068  | 0.1426  | 0.539420 |
| <i>Gm18588</i>       | chr3:68902266-68902758   | 5.3600  | 5.1175  | -0.0668 | 0.762980 |
| <i>Mir15b</i>        | chr3:69009755-69009853   | 25.2456 | 37.8884 | 0.5857  | 0.086769 |
| <i>Mir16-2</i>       | chr3:69009901-69009996   | 7.9848  | 13.7753 | 0.7868  | 0.056564 |
| <i>Gm1647</i>        | chr3:69131232-69157177   | 1.5741  | 1.8745  | 0.2519  | 0.261272 |

|                      |                          |         |         |         |          |
|----------------------|--------------------------|---------|---------|---------|----------|
| <i>Fnip2</i>         | chr3:79455970-79567796   | 0.1295  | 0.1595  | 0.3002  | 0.342705 |
| <i>Tmem144</i>       | chr3:79813147-79842662   | 0.3604  | 0.3244  | -0.1516 | 0.769003 |
| <i>Gucy1b3</i>       | chr3:82032003-82074711   | 0.5666  | 0.7982  | 0.4944  | 0.257403 |
| <i>Gucy1a3</i>       | chr3:82092427-82145877   | 0.6469  | 0.9862  | 0.6083  | 0.009759 |
| <i>Map9</i>          | chr3:82358071-82395268   | 0.1877  | 0.1859  | -0.0142 | 0.976788 |
| <i>Fhdcl</i>         | chr3:84444034-84480429   | 0.4824  | 0.6526  | 0.4360  | 0.328432 |
| <i>NA</i>            | chr3:84965055-84965580   | 6.2335  | 6.5281  | 0.0666  | 0.628988 |
| <i>Fam160a1</i>      | chr3:85660060-85746266   | 0.2231  | 0.5615  | 1.3313  | 0.082712 |
| <i>Rnu73b</i>        | chr3:86140617-86140688   | 39.9743 | 41.6366 | 0.0588  | 0.889193 |
| <i>Mab21l2</i>       | chr3:86545580-86548283   | 0.8782  | 1.3479  | 0.6181  | 0.112934 |
| <i>Cd1d2</i>         | chr3:86986585-86989533   | 0.6644  | 0.9376  | 0.4969  | 0.386033 |
| <i>Fcrl1</i>         | chr3:87376386-87392133   | 0.9917  | 1.4721  | 0.5698  | 0.138512 |
| <i>Iqgap3</i>        | chr3:88082050-88121048   | 0.2436  | 0.2199  | -0.1482 | 0.853897 |
| <i>NA</i>            | chr3:88242873-88287210   | 0.7457  | 0.8191  | 0.1354  | 0.637971 |
| <i>Tsacc</i>         | chr3:88282756-88296999   | 3.1568  | 2.9874  | -0.0796 | 0.686499 |
| <i>Tmem79</i>        | chr3:88328654-88334504   | 0.8086  | 0.9989  | 0.3048  | 0.198732 |
| <i>Rab25</i>         | chr3:88542028-88548300   | 0.2733  | 0.2696  | -0.0197 | 0.968596 |
| <i>Gm20652</i>       | chr3:88616456-88621061   | 3.2136  | 2.9748  | -0.1114 | 0.631930 |
| <i>Rxfp4</i>         | chr3:88651897-88653142   | 0.6851  | 0.8028  | 0.2288  | 0.635882 |
| <i>Gm25820</i>       | chr3:88693930-88694057   | 17.3400 | 16.5134 | -0.0705 | 0.751523 |
| <i>Gm25945</i>       | chr3:88707157-88707292   | 4.7227  | 5.5658  | 0.2370  | 0.661220 |
| <i>Gm22935</i>       | chr3:89097909-89098013   | 4.7096  | 3.2170  | -0.5499 | 0.428866 |
| <i>Hcn3</i>          | chr3:89146073-89160196   | 0.4016  | 0.4247  | 0.0807  | 0.825520 |
| <i>Thbs3</i>         | chr3:89215179-89226837   | 0.4533  | 0.5506  | 0.2805  | 0.385401 |
| <i>Trim46</i>        | chr3:89234176-89246309   | 0.9481  | 0.8821  | -0.1041 | 0.538281 |
| <i>Efn4</i>          | chr3:89333389-89338028   | 0.4446  | 0.3824  | -0.2175 | 0.396729 |
| <i>4731419I09Rik</i> | chr3:89337849-89347831   | 1.0626  | 1.1259  | 0.0836  | 0.455920 |
| <i>Gm10702</i>       | chr3:89353628-89354898   | 0.9954  | 0.9546  | -0.0603 | 0.740806 |
| <i>Cks1b</i>         | chr3:89415471-89418383   | 2.5949  | 3.0442  | 0.2304  | 0.286623 |
| <i>Rps27</i>         | chr3:90212724-90213615   | 12.8916 | 17.2236 | 0.4180  | 0.029196 |
| <i>Creb3l4</i>       | chr3:90237499-90243512   | 0.4596  | 0.7618  | 0.7292  | 0.112510 |
| <i>Slc27a3</i>       | chr3:90385238-90389938   | 0.3748  | 0.4623  | 0.3026  | 0.444801 |
| <i>S100a1</i>        | chr3:90511033-90514392   | 1.7810  | 1.5793  | -0.1734 | 0.501657 |
| <i>Gm9774</i>        | chr3:92428065-92429423   | 1.7955  | 1.1256  | -0.6737 | 0.100551 |
| <i>Gm4202</i>        | chr3:92689424-92690163   | 1.1507  | 1.1306  | -0.0255 | 0.939682 |
| <i>Rplp0-ps1</i>     | chr3:93278140-93279073   | 0.8234  | 0.8316  | 0.0144  | 0.972615 |
| <i>Rorc</i>          | chr3:94372793-94398276   | 0.3744  | 0.2117  | -0.8227 | 0.076042 |
| <i>Tdrkh</i>         | chr3:94413295-94432633   | 0.8512  | 0.8666  | 0.0259  | 0.924689 |
| <i>Celf3</i>         | chr3:94478830-94492193   | 0.4234  | 0.8434  | 0.9942  | 0.069456 |
| <i>Tuft1</i>         | chr3:94612756-94658872   | 1.0160  | 1.1367  | 0.1619  | 0.626760 |
| <i>Tmod4</i>         | chr3:95124475-95129209   | 1.6203  | 1.5373  | -0.0759 | 0.710061 |
| <i>Sema6c</i>        | chr3:95160456-95174024   | 0.2637  | 0.3005  | 0.1885  | 0.686601 |
| <i>Bnpl</i>          | chr3:95241270-95251193   | 0.7871  | 0.9460  | 0.2652  | 0.333736 |
| <i>Gm5070</i>        | chr3:95410345-95411176   | 0.6588  | 0.8364  | 0.3444  | 0.668664 |
| <i>Ctsk</i>          | chr3:95499285-95509362   | 0.5255  | 0.5968  | 0.1835  | 0.318768 |
| <i>Hmgb1-ps5</i>     | chr3:95530417-95530974   | 2.3428  | 3.0815  | 0.3954  | 0.150610 |
| <i>Gm26594</i>       | chr3:95855965-95861485   | 0.5243  | 0.9283  | 0.8241  | 0.082122 |
| <i>C920021L13Rik</i> | chr3:95871521-95889093   | 0.3957  | 0.3697  | -0.0980 | 0.847127 |
| <i>Clart</i>         | chr3:95878502-95882251   | 1.2634  | 1.2601  | -0.0037 | 0.985082 |
| <i>Car14</i>         | chr3:95897767-95904691   | 1.3498  | 1.5630  | 0.2115  | 0.297723 |
| <i>Gm15444</i>       | chr3:96209626-96220168   | 6.8161  | 6.1633  | -0.1452 | 0.641141 |
| <i>Gm20632</i>       | chr3:96239392-96241819   | 1.7059  | 1.5314  | -0.1556 | 0.506783 |
| <i>Gm20634</i>       | chr3:96245553-96248509   | 0.7558  | 0.6303  | -0.2620 | 0.346136 |
| <i>Hist2h3c1</i>     | chr3:96246684-96248509   | 0.9722  | 0.8156  | -0.2535 | 0.472809 |
| <i>Gm21960</i>       | chr3:96412909-96413361   | 3.3539  | 4.0459  | 0.2706  | 0.192101 |
| <i>Gm16253</i>       | chr3:96576983-96580663   | 5.4295  | 5.3714  | -0.0155 | 0.960204 |
| <i>Lix1l</i>         | chr3:96601132-96625352   | 1.4391  | 1.4738  | 0.0344  | 0.895284 |
| <i>6330549D23Rik</i> | chr3:96606658-96629820   | 0.7634  | 0.8746  | 0.1962  | 0.054363 |
| <i>Nudt17</i>        | chr3:96705891-96708560   | 0.5510  | 0.7048  | 0.3552  | 0.212308 |
| <i>Gm22581</i>       | chr3:96724264-96724400   | 6.9492  | 5.1521  | -0.4317 | 0.206158 |
| <i>Pdzk1</i>         | chr3:96829283-96870926   | 1.0031  | 1.0121  | 0.0129  | 0.948999 |
| <i>Gm17608</i>       | chr3:97284907-97297778   | 2.3070  | 2.3507  | 0.0271  | 0.904227 |
| <i>M6pr-ps</i>       | chr3:99500023-99502645   | 0.1980  | 0.1701  | -0.2192 | 0.705273 |
| <i>Gm12474</i>       | chr3:100489663-100523920 | 2.0722  | 2.7314  | 0.3984  | 0.023677 |
| <i>Tspan2</i>        | chr3:102734528-102772292 | 0.4664  | 0.7103  | 0.6068  | 0.097563 |
| <i>Olfml3</i>        | chr3:103722221-103738001 | 0.6814  | 0.7659  | 0.1687  | 0.562674 |
| <i>Gm10964</i>       | chr3:103739365-103746376 | 9.9126  | 7.2316  | -0.4549 | 0.068885 |
| <i>Gm15602</i>       | chr3:103902526-103902963 | 1.9656  | 2.4993  | 0.3465  | 0.309452 |
| <i>Fam19a3</i>       | chr3:104767405-104781840 | 0.7672  | 0.5204  | -0.5599 | 0.087127 |
| <i>Rhoc</i>          | chr3:104789010-104794459 | 1.5652  | 1.8173  | 0.2155  | 0.357285 |
| <i>Wnt2b</i>         | chr3:104944804-104961709 | 0.6515  | 0.8706  | 0.4183  | 0.051437 |

|                      |                          |         |         |         |          |
|----------------------|--------------------------|---------|---------|---------|----------|
| <i>I830077J02Rik</i> | chr3:105925890-105932664 | 0.6375  | 1.4032  | 1.1383  | 0.108225 |
| <i>Pifo</i>          | chr3:105996956-106014646 | 3.1201  | 2.3798  | -0.3908 | 0.439421 |
| <i>Chil3</i>         | chr3:106147553-106167564 | 0.3684  | 0.3818  | 0.0514  | 0.950403 |
| <i>Gm27008</i>       | chr3:106934381-107093894 | 0.7933  | 0.8127  | 0.0349  | 0.889198 |
| <i>A930002I21Rik</i> | chr3:107090879-107098401 | 1.9112  | 1.6842  | -0.1824 | 0.584004 |
| <i>Gstm1</i>         | chr3:108012254-108017973 | 0.4753  | 0.5274  | 0.1500  | 0.513441 |
| <i>Gstm4</i>         | chr3:108040407-108044894 | 0.8973  | 1.7233  | 0.9416  | 0.025644 |
| <i>Gm12500</i>       | chr3:108085975-108088009 | 0.8386  | 0.4938  | -0.7642 | 0.148359 |
| <i>Sypl2</i>         | chr3:108211471-108226648 | 0.0999  | 0.1190  | 0.2530  | 0.703833 |
| <i>Sort1</i>         | chr3:108284090-108361511 | 0.1673  | 0.2938  | 0.8123  | 0.056685 |
| <i>Psrc1</i>         | chr3:108383838-108388231 | 0.6358  | 0.3840  | -0.7275 | 0.032815 |
| <i>5330417C22Rik</i> | chr3:108455693-108536526 | 0.0759  | 0.1281  | 0.7556  | 0.317604 |
| <i>Fndc7</i>         | chr3:108853677-108890008 | 0.0780  | 0.1148  | 0.5577  | 0.299667 |
| <i>Henmt1</i>        | chr3:108940083-108960773 | 0.5001  | 0.9375  | 0.9067  | 0.000725 |
| <i>Vcam1</i>         | chr3:116110019-116129688 | 0.0888  | 0.2335  | 1.3946  | 0.153368 |
| <i>Fnbp1</i>         | chr3:122538718-122619667 | 0.2367  | 0.2879  | 0.2825  | 0.239471 |
| <i>Pde5a</i>         | chr3:122729157-122859374 | 0.3252  | 0.3432  | 0.0776  | 0.801237 |
| <i>Snora24</i>       | chr3:123507936-123508066 | 24.7370 | 33.0581 | 0.4183  | 0.161030 |
| <i>Gm9387</i>        | chr3:128953781-128955098 | 0.4345  | 0.1558  | -1.4798 | 0.035971 |
| <i>Sgms2</i>         | chr3:131318984-131344940 | 0.0767  | 0.1047  | 0.4493  | 0.474041 |
| <i>Slc9b2</i>        | chr3:135307699-135342767 | 0.3887  | 0.5315  | 0.4514  | 0.459651 |
| <i>Bank1</i>         | chr3:136053362-136326046 | 0.9112  | 1.1266  | 0.3061  | 0.432739 |
| <i>Mttp</i>          | chr3:138089854-138143388 | 0.3691  | 0.3006  | -0.2961 | 0.324583 |
| <i>Gm16559</i>       | chr3:138281407-138307022 | 0.7812  | 0.9708  | 0.3135  | 0.203695 |
| <i>Ccb12</i>         | chr3:142701050-142744910 | 0.6716  | 0.9410  | 0.4865  | 0.172236 |
| <i>9530052C20Rik</i> | chr3:142882494-142894644 | 1.1000  | 0.9379  | -0.2300 | 0.452490 |
| <i>Mcoln2</i>        | chr3:146149832-146195513 | 0.9226  | 1.2989  | 0.4934  | 0.074430 |
| <i>4930503B20Rik</i> | chr3:146645192-146651317 | 0.3186  | 0.3046  | -0.0647 | 0.868267 |
| <i>Samd13</i>        | chr3:146645194-146685592 | 0.3796  | 0.3183  | -0.2543 | 0.500736 |
| <i>Gm10288</i>       | chr3:146838774-146839365 | 1.4501  | 1.8424  | 0.3454  | 0.433314 |
| <i>Lphn2</i>         | chr3:148815585-148989316 | 0.0447  | 0.0531  | 0.2489  | 0.770575 |
| <i>Ak5</i>           | chr3:152462814-152668140 | 0.5791  | 0.5657  | -0.0339 | 0.878936 |
| <i>Gm16213</i>       | chr3:152920239-152921399 | 1.5624  | 2.1335  | 0.4494  | 0.053201 |
| <i>St6galnac3</i>    | chr3:153205404-153725062 | 1.2958  | 2.0718  | 0.6770  | 0.056337 |
| <i>Msh4</i>          | chr3:153857146-153906138 | 0.5121  | 0.5545  | 0.1146  | 0.575145 |
| <i>Gm24494</i>       | chr3:153911609-153911690 | 17.4834 | 15.7512 | -0.1505 | 0.317142 |
| <i>Cryz</i>          | chr3:154597196-154623182 | 0.5095  | 0.5473  | 0.1032  | 0.667999 |
| <i>Mir186</i>        | chr3:157544278-157544349 | 10.3700 | 11.5587 | 0.1566  | 0.674663 |
| <i>mt-Th</i>         | chrM:11545-11612         | 9.1925  | 10.0745 | 0.1322  | 0.732243 |
| <i>mt-Ts2</i>        | chrM:11612-11671         | 11.2928 | 13.1557 | 0.2203  | 0.610358 |
| <i>Lyn</i>           | chr4:3678114-3813122     | 0.6123  | 1.3387  | 1.1286  | 0.016395 |
| <i>Gm24016</i>       | chr4:3835078-3835146     | 17.2642 | 17.1260 | -0.0116 | 0.964424 |
| <i>Plag1</i>         | chr4:3900995-3938423     | 0.3386  | 0.3813  | 0.1712  | 0.289883 |
| <i>Penk</i>          | chr4:4133530-4138819     | 0.3946  | 1.9504  | 2.3053  | 0.032810 |
| <i>Fam110b</i>       | chr4:5644089-6108223     | 0.0936  | 0.1409  | 0.5896  | 0.203543 |
| <i>Gm11802</i>       | chr4:6688168-6704160     | 3.6092  | 5.2386  | 0.5375  | 0.087846 |
| <i>Asph</i>          | chr4:9448068-9669344     | 0.1878  | 0.2152  | 0.1967  | 0.115834 |
| <i>Gm11814</i>       | chr4:10438814-10439743   | 1.6280  | 2.1943  | 0.4307  | 0.299164 |
| <i>Gm26663</i>       | chr4:11321943-11342953   | 0.5431  | 0.3117  | -0.8010 | 0.086424 |
| <i>Gm11831</i>       | chr4:11501455-11502839   | 1.9170  | 2.8597  | 0.5770  | 0.047691 |
| <i>Rad54b</i>        | chr4:11558919-11615805   | 0.1778  | 0.2524  | 0.5055  | 0.096553 |
| <i>Gem</i>           | chr4:11704456-11714752   | 0.5493  | 0.7253  | 0.4009  | 0.666076 |
| <i>1700123M08Rik</i> | chr4:11966564-11994280   | 0.8947  | 1.1675  | 0.3840  | 0.339004 |
| <i>Tmem67</i>        | chr4:12039354-12090020   | 0.3649  | 0.4524  | 0.3100  | 0.116012 |
| <i>Gm11869</i>       | chr4:15969571-15969928   | 1.3670  | 1.8277  | 0.4190  | 0.437501 |
| <i>A530072M11Rik</i> | chr4:16164109-16266225   | 1.4323  | 1.3171  | -0.1210 | 0.468142 |
| <i>Gm12353</i>       | chr4:19605450-19651130   | 5.5996  | 6.4565  | 0.2054  | 0.287769 |
| <i>Gm11906</i>       | chr4:24966516-25271099   | 5.4046  | 5.4855  | 0.0214  | 0.900656 |
| <i>Gm24371</i>       | chr4:32514786-32515053   | 8.2974  | 10.7348 | 0.3716  | 0.368915 |
| <i>Gm11942</i>       | chr4:32964887-32965232   | 2.6421  | 2.3187  | -0.1884 | 0.611019 |
| <i>Spaca1</i>        | chr4:34024873-34050191   | 2.1291  | 0.8147  | -1.3858 | 0.019880 |
| <i>Gm12350</i>       | chr4:34485831-34486293   | 2.7006  | 2.7740  | 0.0386  | 0.902170 |
| <i>Gm12363</i>       | chr4:34842984-34843652   | 2.1385  | 2.3727  | 0.1500  | 0.721119 |
| <i>Gm12403</i>       | chr4:41168645-41169604   | 0.5722  | 0.6873  | 0.2645  | 0.351502 |
| <i>Gm26049</i>       | chr4:41312090-41312198   | 9.5662  | 13.6803 | 0.5161  | 0.190062 |
| <i>Gm12404</i>       | chr4:41520693-41525823   | 0.5316  | 0.4557  | -0.2221 | 0.475606 |
| <i>Ccl27a</i>        | chr4:41769466-41774247   | 0.5567  | 0.4225  | -0.3978 | 0.027164 |
| <i>Gm12454</i>       | chr4:43504427-43508747   | 2.7768  | 1.9240  | -0.5293 | 0.031002 |
| <i>Car9</i>          | chr4:43506965-43513729   | 0.7054  | 0.7092  | 0.0078  | 0.975359 |
| <i>Spag8</i>         | chr4:43651334-43653594   | 0.4369  | 0.3691  | -0.2430 | 0.539548 |
| <i>Fam221b</i>       | chr4:43659621-43669145   | 0.7266  | 0.7738  | 0.0909  | 0.763166 |

|               |                          |         |         |         |          |
|---------------|--------------------------|---------|---------|---------|----------|
| Gm12481       | chr4:43663948-43664408   | 6.9695  | 7.4225  | 0.0909  | 0.763166 |
| Tmem8b        | chr4:43668970-43692668   | 0.2794  | 0.2990  | 0.0980  | 0.758559 |
| Gm12504       | chr4:44121892-44124123   | 0.5550  | 0.6617  | 0.2536  | 0.280891 |
| Melk          | chr4:44300875-44364675   | 0.7625  | 1.0211  | 0.4213  | 0.304458 |
| 1700055D18Rik | chr4:45012829-45014399   | 1.1492  | 1.2160  | 0.0815  | 0.774857 |
| Gm25692       | chr4:45396993-45397118   | 8.9946  | 9.5820  | 0.0913  | 0.705968 |
| Stra6l        | chr4:45848663-45887008   | 0.1673  | 0.2929  | 0.8081  | 0.151518 |
| Gm23250       | chr4:46118179-46118446   | 1.7800  | 1.9960  | 0.1653  | 0.769648 |
| Gm12444       | chr4:46243013-46243890   | 0.6542  | 0.6078  | -0.1060 | 0.845641 |
| Gm16731       | chr4:46535900-46539802   | 2.7941  | 3.5001  | 0.3250  | 0.150507 |
| Tbc1d2        | chr4:46604389-46650209   | 0.0986  | 0.1303  | 0.4014  | 0.505382 |
| Gm568         | chr4:47008315-47010781   | 4.6896  | 3.3473  | -0.4864 | 0.248370 |
| 1700060J05Rik | chr4:53562982-53564697   | 1.2137  | 0.9427  | -0.3646 | 0.108669 |
| Fsd1l         | chr4:53631470-53707009   | 0.2423  | 0.2604  | 0.1041  | 0.785243 |
| Gm25687       | chr4:54468332-54468611   | 8.9358  | 7.8655  | -0.1841 | 0.563052 |
| Actl7a        | chr4:56743421-56744925   | 0.6410  | 0.6207  | -0.0465 | 0.947008 |
| Ctnna1        | chr4:56810934-56865188   | 0.2368  | 0.3360  | 0.5050  | 0.133715 |
| D630039A03Rik | chr4:57908482-57916297   | 0.5537  | 0.9568  | 0.7892  | 0.271240 |
| Gm12577       | chr4:58483251-58483825   | 2.2208  | 2.1973  | -0.0153 | 0.956668 |
| Gm12596       | chr4:59260050-59263269   | 1.3081  | 1.5152  | 0.2121  | 0.598746 |
| Gm12529       | chr4:59532746-59533014   | 10.0125 | 11.1329 | 0.1530  | 0.564975 |
| Gm12543       | chr4:59833676-59834219   | 0.9099  | 0.7910  | -0.2020 | 0.717778 |
| Zfp618        | chr4:62965572-63139708   | 0.1211  | 0.0075  | -4.0146 | 0.000176 |
| Col27a1       | chr4:63214003-63334991   | 0.0574  | 0.1427  | 1.3140  | 0.009697 |
| Orm3          | chr4:63356161-63359511   | 1.1953  | 3.4517  | 1.5299  | 0.011532 |
| Whrn          | chr4:63414909-63495991   | 0.4058  | 0.6854  | 0.7564  | 0.047980 |
| Gm11483       | chr4:63567413-63567660   | 1.7922  | 1.3758  | -0.3815 | 0.510894 |
| Tnc           | chr4:63959784-64047015   | 0.1645  | 0.5631  | 1.7756  | 0.176769 |
| Gm11221       | chr4:69691977-69692574   | 1.4250  | 1.0962  | -0.3785 | 0.180351 |
| Gm11223       | chr4:69925200-69926171   | 1.6421  | 1.6252  | -0.0149 | 0.940532 |
| Gm11488       | chr4:73497614-73498477   | 0.8115  | 1.1440  | 0.4955  | 0.146488 |
| Gm11263       | chr4:79327707-79328456   | 0.4532  | 0.4152  | -0.1265 | 0.875827 |
| Gm12630       | chr4:86817793-86818577   | 0.9020  | 1.1660  | 0.3704  | 0.072414 |
| Gm12631       | chr4:88033500-88034998   | 1.3913  | 1.1141  | -0.3206 | 0.435464 |
| Mrpl48-ps     | chr4:88599174-88599810   | 3.5656  | 2.5154  | -0.5033 | 0.160237 |
| NA            | chr4:91805348-91806561   | 2.4390  | 2.3724  | -0.0399 | 0.840838 |
| Tusc1         | chr4:93334147-93335511   | 3.4214  | 1.1301  | -1.5981 | 0.000392 |
| Gm12655       | chr4:94460930-94477180   | 3.2533  | 1.7886  | -0.8630 | 0.292757 |
| Gm10306       | chr4:94556545-94557078   | 3.5067  | 2.7821  | -0.3339 | 0.296281 |
| Gm12657       | chr4:94593649-94600310   | 1.7920  | 1.5632  | -0.1970 | 0.403273 |
| Gm12693       | chr4:94935620-94936103   | 3.2642  | 3.5029  | 0.1018  | 0.723891 |
| Jun           | chr4:95049033-95052222   | 2.8666  | 10.1332 | 1.8217  | 0.291072 |
| Junos         | chr4:95051533-95167318   | 0.3375  | 0.8820  | 1.3858  | 0.343132 |
| Fggy          | chr4:95557506-95926939   | 0.4374  | 0.4164  | -0.0710 | 0.791591 |
| 9530080O11Rik | chr4:95959714-95967655   | 0.9170  | 0.8024  | -0.1925 | 0.542354 |
| Atg4c         | chr4:99193933-99259787   | 0.1634  | 0.3408  | 1.0605  | 0.007420 |
| Efcab7        | chr4:99829197-99912788   | 1.6576  | 1.5035  | -0.1408 | 0.519574 |
| Gm24468       | chr4:101186763-101186867 | 11.3691 | 9.3735  | -0.2785 | 0.590981 |
| Gm12785       | chr4:101210415-101210587 | 3.5663  | 4.0319  | 0.1771  | 0.769690 |
| 0610043K17Rik | chr4:101353782-101399181 | 2.1665  | 2.9792  | 0.4596  | 0.042962 |
| Gm12799       | chr4:102046567-102049127 | 0.5568  | 0.4681  | -0.2504 | 0.209701 |
| Sgip1         | chr4:102741296-102973628 | 0.0641  | 0.0903  | 0.4932  | 0.507603 |
| Pcsk9         | chr4:106442328-106464329 | 0.3112  | 0.2470  | -0.3332 | 0.164179 |
| Fam151a       | chr4:106733888-106748292 | 1.1119  | 1.4652  | 0.3980  | 0.121459 |
| Gm12870       | chr4:107327483-107328499 | 0.9704  | 0.8868  | -0.1300 | 0.674304 |
| Echdc2        | chr4:108165436-108179308 | 0.1342  | 0.0877  | -0.6138 | 0.561542 |
| Gm12737       | chr4:108513780-108516817 | 2.4908  | 2.3419  | -0.0890 | 0.595094 |
| Orc1          | chr4:108579422-108614833 | 0.6834  | 0.7214  | 0.0780  | 0.807824 |
| Gm12743       | chr4:108592424-108619849 | 0.3259  | 0.4224  | 0.3740  | 0.388281 |
| Zfyve9        | chr4:108637465-108780798 | 0.3487  | 0.4381  | 0.3291  | 0.186109 |
| Gm12749       | chr4:109373700-109374859 | 1.6945  | 2.0255  | 0.2574  | 0.319208 |
| Ttc39a        | chr4:109406622-109444745 | 0.1018  | 0.1196  | 0.2331  | 0.570421 |
| Gm12961       | chr4:111790620-111791670 | 0.7205  | 1.3653  | 0.9221  | 0.025085 |
| Foxd2         | chr4:114906279-114908898 | 0.4477  | 0.5543  | 0.3080  | 0.380627 |
| Stil          | chr4:115000158-115043196 | 0.2399  | 0.4038  | 0.7514  | 0.035271 |
| Gm12847       | chr4:115818856-115822655 | 6.1577  | 6.9530  | 0.1752  | 0.227280 |
| Lurap1        | chr4:116132405-116151338 | 0.6192  | 0.6725  | 0.1191  | 0.522181 |
| Tspan1        | chr4:116161868-116167601 | 0.6534  | 0.8272  | 0.3403  | 0.321327 |
| Gm12953       | chr4:116551739-116552627 | 3.2691  | 2.6560  | -0.2997 | 0.228319 |
| Zswim5        | chr4:116877375-116989264 | 0.2071  | 0.3347  | 0.6925  | 0.031333 |
| Ptch2         | chr4:117096074-117116101 | 0.2021  | 0.2706  | 0.4213  | 0.137079 |

|                      |                          |         |         |         |          |
|----------------------|--------------------------|---------|---------|---------|----------|
| <i>Tctex1d4</i>      | chr4:117126793-117128738 | 1.5946  | 1.5858  | -0.0080 | 0.970647 |
| <i>Best4-ps</i>      | chr4:117145256-117148637 | 0.6071  | 0.4506  | -0.4300 | 0.204040 |
| <i>Gm26330</i>       | chr4:117155185-117155289 | 17.9320 | 19.0379 | 0.0863  | 0.810283 |
| <i>Snord55</i>       | chr4:117155769-117155848 | 29.0283 | 17.5406 | -0.7268 | 0.049919 |
| <i>Klf2c</i>         | chr4:117159638-117182639 | 0.6073  | 0.6827  | 0.1689  | 0.702817 |
| <i>Gm25099</i>       | chr4:117189941-117190057 | 21.8435 | 25.3030 | 0.2121  | 0.538334 |
| <i>Gm12867</i>       | chr4:119130291-119131001 | 2.5714  | 2.0022  | -0.3609 | 0.252359 |
| <i>Gm12868</i>       | chr4:119133748-119138801 | 4.7557  | 4.1179  | -0.2077 | 0.477009 |
| <i>Gm12898</i>       | chr4:119223173-119224815 | 6.3677  | 5.0811  | -0.3256 | 0.081848 |
| <i>NA</i>            | chr4:119733795-119736768 | 0.4129  | 0.6786  | 0.7166  | 0.005384 |
| <i>Rims3</i>         | chr4:120854815-120896579 | 0.3291  | 0.3743  | 0.1858  | 0.529632 |
| <i>Mfsd2a</i>        | chr4:122946849-122961188 | 1.2327  | 0.9333  | -0.4014 | 0.227730 |
| <i>Gm25788</i>       | chr4:123291343-123291474 | 15.7280 | 15.9770 | 0.0227  | 0.960237 |
| <i>Gm22154</i>       | chr4:123293151-123293282 | 9.6952  | 13.6787 | 0.4966  | 0.120841 |
| <i>Gm12924</i>       | chr4:123435616-123435934 | 3.8250  | 4.1778  | 0.1273  | 0.553693 |
| <i>Gm23548</i>       | chr4:123490230-123490336 | 12.4510 | 14.4808 | 0.2179  | 0.362241 |
| <i>Ndufs5</i>        | chr4:123712709-123718202 | 2.1883  | 2.9096  | 0.4110  | 0.158500 |
| <i>Gm26606</i>       | chr4:123898632-123904842 | 0.2557  | 0.1668  | -0.6166 | 0.322479 |
| <i>Gm12905</i>       | chr4:123905061-123917269 | 3.0945  | 1.9075  | -0.6980 | 0.002879 |
| <i>4930535116Rik</i> | chr4:123917503-123918022 | 4.4294  | 3.1560  | -0.4890 | 0.034437 |
| <i>Gm12902</i>       | chr4:123926233-123926555 | 2.6274  | 2.7744  | 0.0785  | 0.906842 |
| <i>Gm12917</i>       | chr4:124718998-124719637 | 5.0430  | 4.2802  | -0.2366 | 0.299759 |
| <i>Dnali1</i>        | chr4:125055337-125065703 | 1.2714  | 1.5497  | 0.2855  | 0.181964 |
| <i>Gm12932</i>       | chr4:125082856-125084947 | 3.3568  | 3.3233  | -0.0145 | 0.913021 |
| <i>Oscp1</i>         | chr4:126058564-126092195 | 0.1199  | 0.0976  | -0.2969 | 0.486149 |
| <i>Sh3d21</i>        | chr4:126150601-126163491 | 0.9472  | 1.0186  | 0.1048  | 0.576871 |
| <i>Gm25323</i>       | chr4:126201174-126201277 | 4.1430  | 7.3276  | 0.8227  | 0.066881 |
| <i>Gm12941</i>       | chr4:127046382-127046602 | 5.8851  | 4.4943  | -0.3890 | 0.298760 |
| <i>A3galt2</i>       | chr4:128755363-128769298 | 0.2642  | 0.2704  | 0.0336  | 0.904922 |
| <i>Trim62</i>        | chr4:128883579-128911328 | 0.5194  | 0.6911  | 0.4119  | 0.271593 |
| <i>C77080</i>        | chr4:129219577-129261404 | 0.3883  | 0.5339  | 0.4592  | 0.148504 |
| <i>Gm10571</i>       | chr4:129855070-129856710 | 1.4697  | 1.6091  | 0.1308  | 0.448327 |
| <i>Col16a1</i>       | chr4:130047839-130099283 | 0.0993  | 0.1734  | 0.8052  | 0.413291 |
| <i>Fabp3</i>         | chr4:130308594-130315463 | 1.0099  | 0.9555  | -0.0799 | 0.773387 |
| <i>Gm12971</i>       | chr4:130758562-130762379 | 3.4424  | 3.1622  | -0.1225 | 0.707308 |
| <i>Tmem200b</i>      | chr4:131921770-131923140 | 0.3631  | 0.3893  | 0.1003  | 0.829776 |
| <i>Gm13063</i>       | chr4:132048177-132048961 | 4.8373  | 4.8315  | -0.0017 | 0.994175 |
| <i>Gm10300</i>       | chr4:132074696-132076992 | 0.5888  | 0.7319  | 0.3139  | 0.308686 |
| <i>Snora16a</i>      | chr4:132309464-132309600 | 30.2725 | 26.4594 | -0.1942 | 0.105286 |
| <i>Snord99</i>       | chr4:132310690-132310764 | 28.9404 | 34.9784 | 0.2734  | 0.412851 |
| <i>Gm12999</i>       | chr4:132532686-132533601 | 5.7260  | 6.1900  | 0.1124  | 0.784975 |
| <i>Ptafr</i>         | chr4:132564066-132582683 | 0.2672  | 0.3493  | 0.3866  | 0.476749 |
| <i>Smpd13b</i>       | chr4:132732965-132757252 | 1.0862  | 1.8313  | 0.7535  | 0.207826 |
| <i>Gm22767</i>       | chr4:132838382-132838547 | 9.3061  | 8.2777  | -0.1689 | 0.253411 |
| <i>Gm13033</i>       | chr4:132884544-132886626 | 0.3740  | 0.3242  | -0.2061 | 0.755521 |
| <i>Zfp683</i>        | chr4:134053837-134058996 | 0.6490  | 1.1164  | 0.7825  | 0.026243 |
| <i>Stmn1</i>         | chr4:134468319-134473843 | 1.4856  | 1.7161  | 0.2081  | 0.539571 |
| <i>Rhd</i>           | chr4:134864535-134896172 | 1.3014  | 1.4510  | 0.1569  | 0.661861 |
| <i>Mir700</i>        | chr4:135416554-135416633 | 54.7194 | 43.7656 | -0.3223 | 0.202827 |
| <i>Gm15979</i>       | chr4:135430125-135430841 | 4.1379  | 4.8426  | 0.2269  | 0.033806 |
| <i>Stpg1</i>         | chr4:135494789-135537803 | 0.2787  | 0.1517  | -0.8773 | 0.280951 |
| <i>Gm24362</i>       | chr4:136018070-136018486 | 2.7175  | 2.8177  | 0.0522  | 0.876380 |
| <i>Gm27022</i>       | chr4:136347846-136349441 | 4.5857  | 4.7406  | 0.0479  | 0.835375 |
| <i>6030445D17Rik</i> | chr4:136462249-136463977 | 0.4026  | 0.5271  | 0.3888  | 0.180943 |
| <i>Gm12987</i>       | chr4:136584171-136584660 | 1.3477  | 0.8830  | -0.6101 | 0.073616 |
| <i>Wnt4</i>          | chr4:137277488-137299726 | 0.2350  | 0.3016  | 0.3595  | 0.496156 |
| <i>Gm25772</i>       | chr4:137325558-137325614 | 16.2782 | 13.4064 | -0.2800 | 0.463102 |
| <i>Rap1gap</i>       | chr4:137664725-137729861 | 0.1058  | 0.1437  | 0.4414  | 0.609792 |
| <i>1700095J12Rik</i> | chr4:138137594-138138518 | 1.1317  | 1.0337  | -0.1306 | 0.836425 |
| <i>2310026L22Rik</i> | chr4:138215713-138216189 | 4.8778  | 5.6588  | 0.2143  | 0.219835 |
| <i>Sh2d5</i>         | chr4:138250402-138261332 | 0.2968  | 0.2136  | -0.4746 | 0.326247 |
| <i>Camk2n1</i>       | chr4:138454313-138460123 | 0.1288  | 0.1525  | 0.2432  | 0.579342 |
| <i>Padi4</i>         | chr4:140745864-140774236 | 0.2501  | 0.6504  | 1.3786  | 0.174443 |
| <i>Gm13032</i>       | chr4:140810992-140817511 | 1.0199  | 1.0064  | -0.0193 | 0.961378 |
| <i>Padi1</i>         | chr4:140812982-140845778 | 0.8246  | 0.8149  | -0.0170 | 0.957192 |
| <i>Gm13031</i>       | chr4:140947665-140957902 | 2.2069  | 1.9828  | -0.1545 | 0.418318 |
| <i>Spata21</i>       | chr4:141088332-141112760 | 0.2869  | 0.4440  | 0.6301  | 0.136330 |
| <i>Rsg1</i>          | chr4:141213955-141226756 | 1.0353  | 0.8113  | -0.3518 | 0.260395 |
| <i>Cela2a</i>        | chr4:141814961-141826160 | 0.2389  | 0.2690  | 0.1712  | 0.697773 |
| <i>Ctrc</i>          | chr4:141814961-141846359 | 0.3013  | 0.3134  | 0.0566  | 0.902359 |
| <i>Gm13038</i>       | chr4:143152571-143153030 | 7.0953  | 8.1542  | 0.2007  | 0.202353 |

|                      |                           |         |         |         |          |
|----------------------|---------------------------|---------|---------|---------|----------|
| <i>Gm13127</i>       | chr4:144587243-144588632  | 1.6529  | 1.5646  | -0.0792 | 0.758705 |
| <i>Dhrs3</i>         | chr4:144892826-144928209  | 0.7259  | 1.0607  | 0.5473  | 0.129925 |
| <i>Tnfrsf8</i>       | chr4:145267136-145315164  | 0.5036  | 0.9069  | 0.8487  | 0.145617 |
| <i>Smarca5-ps</i>    | chr4:145464203-145467420  | 0.6813  | 0.4321  | -0.6571 | 0.041397 |
| <i>Znf41-ps</i>      | chr4:145825236-145829942  | 1.3814  | 1.4430  | 0.0630  | 0.561578 |
| <i>Gm13251</i>       | chr4:146449022-146470292  | 0.4779  | 0.4207  | -0.1838 | 0.556896 |
| <i>Gm13248</i>       | chr4:146610960-146658160  | 0.7023  | 0.6238  | -0.1712 | 0.762198 |
| <i>Gm13139</i>       | chr4:147132037-147180579  | 0.6301  | 0.6777  | 0.1052  | 0.680294 |
| <i>Gm13152</i>       | chr4:147492416-147513486  | 0.4396  | 0.7318  | 0.7353  | 0.110222 |
| <i>Gm13154</i>       | chr4:147553276-147585198  | 0.4454  | 0.2146  | -1.0531 | 0.136340 |
| <i>Rps19-ps3</i>     | chr4:147821776-147822202  | 3.1858  | 3.9175  | 0.2983  | 0.316464 |
| <i>Gm13207</i>       | chr4:148031553-148032326  | 1.6733  | 1.5653  | -0.0962 | 0.758228 |
| <i>Fbxo44</i>        | chr4:148152799-148160482  | 0.8447  | 0.6404  | -0.3995 | 0.207374 |
| <i>Angpt17</i>       | chr4:148495182-148500460  | 0.5930  | 0.8203  | 0.4682  | 0.256716 |
| <i>Gm13205</i>       | chr4:148947491-148948914  | 2.4881  | 3.3166  | 0.4147  | 0.220689 |
| <i>Apitd1</i>        | chr4:149127120-149137629  | 0.4404  | 0.4607  | 0.0653  | 0.827615 |
| <i>Rpsa-ps12</i>     | chr4:149142496-149143388  | 0.7323  | 0.8167  | 0.1574  | 0.736323 |
| <i>Ube4bos3</i>      | chr4:149334638-149335897  | 3.5894  | 3.6082  | 0.0076  | 0.958935 |
| <i>Gm13071</i>       | chr4:149500632-149501008  | 1.1773  | 1.7543  | 0.5754  | 0.244171 |
| <i>Slc25a33</i>      | chr4:149744035-149774277  | 1.4646  | 1.5321  | 0.0650  | 0.594472 |
| <i>Gm13068</i>       | chr4:149748517-149749607  | 0.7457  | 0.8076  | 0.1149  | 0.820684 |
| <i>Gm13070</i>       | chr4:149904005-149908149  | 3.1721  | 3.3805  | 0.0918  | 0.791630 |
| <i>Gpr157</i>        | chr4:150087364-150105927  | 0.2707  | 0.4289  | 0.6641  | 0.012414 |
| <i>Rps15a-ps3</i>    | chr4:150847112-150847507  | 4.5003  | 5.3187  | 0.2411  | 0.660163 |
| <i>Per3</i>          | chr4:151003651-151044665  | 0.2794  | 0.3959  | 0.5029  | 0.198784 |
| <i>Plekhg5</i>       | chr4:152072497-152115400  | 0.7432  | 0.8413  | 0.1789  | 0.488846 |
| <i>Rnf207</i>        | chr4:152307018-152318993  | 0.1304  | 0.1170  | -0.1555 | 0.776263 |
| <i>Chd5</i>          | chr4:152338650-152390194  | 0.2096  | 0.3176  | 0.5993  | 0.048106 |
| <i>Gm16333</i>       | chr4:152410799-152411262  | 4.5709  | 4.5623  | -0.0027 | 0.993539 |
| <i>Gm16334</i>       | chr4:152418282-152421834  | 1.9113  | 2.9407  | 0.6216  | 0.032137 |
| <i>Nphp4</i>         | chr4:152476705-152563183  | 0.1037  | 0.1604  | 0.6284  | 0.352238 |
| <i>Fam213b</i>       | chr4:154895503-154899135  | 1.3017  | 1.4305  | 0.1361  | 0.723319 |
| <i>Morn1</i>         | chr4:155086576-155145505  | 0.3451  | 0.3745  | 0.1180  | 0.686430 |
| <i>5830444B04Rik</i> | chr4:155398762-155421704  | 1.3358  | 0.9742  | -0.4554 | 0.767028 |
| <i>Gm13171</i>       | chr4:155502315-155502706  | 1.7633  | 1.9628  | 0.1546  | 0.658621 |
| <i>Gm10563</i>       | chr4:155614412-155645408  | 4.2334  | 5.5631  | 0.3941  | 0.118776 |
| <i>Mmp23</i>         | chr4:155650654-155653384  | 0.4972  | 0.5572  | 0.1644  | 0.457707 |
| <i>Gm22573</i>       | chr4:155720039-155720141  | 15.1312 | 14.8043 | -0.0315 | 0.932883 |
| <i>Vwa1</i>          | chr4:155768148-155774698  | 0.1621  | 0.2189  | 0.4330  | 0.324575 |
| <i>Mxra8</i>         | chr4:155839679-155844088  | 0.3814  | 0.3232  | -0.2386 | 0.664829 |
| <i>Fam132a</i>       | chr4:155962317-155966629  | 2.3925  | 2.6746  | 0.1608  | 0.425829 |
| <i>Plekhg1</i>       | chr10:3740363-3967303     | 0.0343  | 0.0467  | 0.4457  | 0.566789 |
| <i>4930432B10Rik</i> | chr10:11244789-11281221   | 0.1124  | 0.1255  | 0.1590  | 0.815784 |
| <i>Gm4895</i>        | chr10:22153279-22154416   | 0.7745  | 0.8604  | 0.1518  | 0.727670 |
| <i>n-R5s76</i>       | chr10:31317168-31317281   | 4.7288  | 2.2730  | -1.0569 | 0.157571 |
| <i>Gm16998</i>       | chr10:54075921-54081081   | 0.5210  | 0.3918  | -0.4114 | 0.372607 |
| <i>Sept10</i>        | chr10:59164112-59221847   | 0.2994  | 0.4657  | 0.6371  | 0.257980 |
| <i>Gm9923</i>        | chr10:72309224-72311848   | 0.1968  | 0.1646  | -0.2576 | 0.604740 |
| <i>Trpm2</i>         | chr10:77907721-77970563   | 0.0547  | 0.1627  | 1.5722  | 0.039638 |
| <i>Ppap2c</i>        | chr10:79526429-79533787   | 0.5241  | 0.8273  | 0.6586  | 0.063036 |
| <i>Gm24019</i>       | chr10:79909194-79909301   | 3.0833  | 2.7701  | -0.1545 | 0.807466 |
| <i>Gm17151</i>       | chr10:80766858-80768987   | 2.7733  | 1.9992  | -0.4722 | 0.523300 |
| <i>Hal</i>           | chr10:93488767-93519304   | 0.2088  | 0.1209  | -0.7890 | 0.064484 |
| <i>Gm15910</i>       | chr10:120857628-120863326 | 0.2178  | 0.1615  | -0.4317 | 0.554304 |
| <i>Cyp27b1</i>       | chr10:127048249-127053006 | 0.2469  | 0.2101  | -0.2330 | 0.679165 |
| <i>Rps15a-ps6</i>    | chr11:6172643-6173036     | 1.5614  | 1.6115  | 0.0456  | 0.925270 |
| <i>Gm22753</i>       | chr11:23479560-23479667   | 4.3660  | 4.8432  | 0.1497  | 0.738499 |
| <i>Rpsa-ps4</i>      | chr11:33038815-33039703   | 0.7023  | 0.5514  | -0.3489 | 0.357282 |
| <i>Gm12174</i>       | chr11:46727817-46728630   | 0.8196  | 0.5941  | -0.4644 | 0.229863 |
| <i>Scgb3a1</i>       | chr11:49663609-49665118   | 1.8827  | 1.5213  | -0.3075 | 0.528002 |
| <i>Rpl9-ps3</i>      | chr11:53501183-53501762   | 0.8293  | 1.2893  | 0.6366  | 0.281386 |
| <i>Nlrp3</i>         | chr11:59541567-59566956   | 0.1146  | 0.1531  | 0.4187  | 0.583949 |
| <i>1700007J10Rik</i> | chr11:59725916-59740154   | 0.6743  | 0.5925  | -0.1865 | 0.539669 |
| <i>Rasd1</i>         | chr11:59963180-59964944   | 0.2376  | 0.3155  | 0.4088  | 0.354969 |
| <i>Gm12267</i>       | chr11:60449209-60449970   | 0.7104  | 0.4668  | -0.6059 | 0.157221 |
| <i>Gm12279</i>       | chr11:62550046-62551041   | 2.0788  | 1.4108  | -0.5592 | 0.279429 |
| <i>Gucy2e</i>        | chr11:69218116-69237036   | 0.0744  | 0.0325  | -1.1922 | 0.117348 |
| <i>Cldn7</i>         | chr11:69964778-69967885   | 0.3750  | 0.3263  | -0.2008 | 0.602377 |
| <i>Nlrp1a</i>        | chr11:71092235-71144704   | 0.1751  | 0.1927  | 0.1381  | 0.813720 |
| <i>Wscd1</i>         | chr11:71749919-71789647   | 0.0833  | 0.0325  | -1.3593 | 0.118177 |
| <i>Tax1bp3</i>       | chr11:73177082-73183162   | 0.3292  | 0.3505  | 0.0907  | 0.824125 |



|                      |                           |        |        |         |          |
|----------------------|---------------------------|--------|--------|---------|----------|
| <i>Snord91a</i>      | chr11:74905423-74905516   | 8.7950 | 7.9174 | -0.1517 | 0.602443 |
| <i>Gm22771</i>       | chr11:74906108-74906199   | 6.2260 | 7.4328 | 0.2556  | 0.566911 |
| <i>Efcab5</i>        | chr11:77089914-77188968   | 0.1177 | 0.1453 | 0.3039  | 0.340958 |
| <i>Gm10277</i>       | chr11:77785452-77787747   | 0.2350 | 0.3149 | 0.4218  | 0.238917 |
| <i>Gm11193</i>       | chr11:78292847-78293956   | 1.4253 | 1.3265 | -0.1037 | 0.818696 |
| <i>D11Bhm181e</i>    | chr11:78561318-78561600   | 2.4424 | 2.0657 | -0.2417 | 0.735358 |
| <i>Gm11196</i>       | chr11:78585160-78585555   | 2.2249 | 1.7739 | -0.3268 | 0.476959 |
| <i>Akirin1-ps</i>    | chr11:85216596-85217054   | 1.2054 | 2.1424 | 0.8297  | 0.036209 |
| <i>Prr11</i>         | chr11:87089152-87108708   | 0.2213 | 0.2916 | 0.3980  | 0.470084 |
| <i>Rnu1a1</i>        | chr11:87422866-87423030   | 4.4258 | 3.8250 | -0.2105 | 0.670224 |
| <i>Hsd17b1</i>       | chr11:101078410-101080527 | 0.7850 | 0.6772 | -0.2131 | 0.552795 |
| <i>Gm26316</i>       | chr11:101604849-101605040 | 2.8111 | 3.3279 | 0.2435  | 0.739203 |
| <i>Arhgap27os1</i>   | chr11:103363212-103364651 | 0.5551 | 0.5127 | -0.1148 | 0.756056 |
| <i>Gm11639</i>       | chr11:104685706-104753962 | 0.1900 | 0.1402 | -0.4390 | 0.271523 |
| <i>Gm11652</i>       | chr11:105773517-105774784 | 0.5271 | 0.7588 | 0.5256  | 0.160291 |
| <i>2310007L24Rik</i> | chr11:106365473-106377114 | 0.7207 | 0.8231 | 0.1916  | 0.678475 |
| <i>Rps12-ps26</i>    | chr11:107171899-107172232 | 2.8896 | 2.6400 | -0.1303 | 0.766611 |
| <i>Gm11674</i>       | chr11:111796346-111800876 | 0.2696 | 0.1448 | -0.8965 | 0.145331 |
| <i>Foxj1</i>         | chr11:116330703-116335399 | 0.1312 | 0.0126 | -3.3848 | 0.094802 |
| <i>Npb</i>           | chr11:120608476-120609093 | 2.0786 | 1.6834 | -0.3043 | 0.438353 |
| <i>Rac3</i>          | chr11:120721469-120723969 | 0.4820 | 0.5626 | 0.2230  | 0.459475 |
| <i>Metrnl</i>        | chr11:121701543-121716306 | 0.2895 | 0.4936 | 0.7699  | 0.411012 |
| <i>Gm9144</i>        | chr12:7859826-7861205     | 0.5241 | 0.3542 | -0.5654 | 0.139345 |
| <i>Gm7099</i>        | chr12:9429545-9430099     | 0.9664 | 0.5350 | -0.8532 | 0.076009 |
| <i>Gm5432</i>        | chr12:15817002-15888155   | 0.3712 | 0.4616 | 0.3145  | 0.328368 |
| <i>Gm17673</i>       | chr12:83954498-83984852   | 0.2346 | 0.2534 | 0.1114  | 0.703192 |
| <i>Samd15</i>        | chr12:87199722-87213541   | 0.2845 | 0.2610 | -0.1245 | 0.819753 |
| <i>Dio2</i>          | chr12:90724553-90738438   | 0.0765 | 0.0543 | -0.4953 | 0.480789 |
| <i>Mir342</i>        | chr12:108658619-108658718 | 5.1265 | 3.9696 | -0.3690 | 0.500114 |
| <i>Begain</i>        | chr12:109032186-109068217 | 0.3807 | 0.3962 | 0.0577  | 0.869965 |
| <i>BC022687</i>      | chr12:112808974-112816245 | 0.2140 | 0.1869 | -0.1951 | 0.653343 |
| <i>Ighg3</i>         | chr12:113359664-113361232 | 0.4447 | 0.3300 | -0.4305 | 0.815652 |
| <i>Gm24022</i>       | chr12:113424748-113424818 | 4.3706 | 3.8503 | -0.1829 | 0.812458 |
| <i>2810429I04Rik</i> | chr13:3478242-3494398     | 0.0513 | 0.1061 | 1.0484  | 0.171588 |
| <i>Gm11281</i>       | chr13:21953052-21953628   | 1.1946 | 1.7939 | 0.5866  | 0.160995 |
| <i>Gm22358</i>       | chr13:24811446-24811568   | 3.6762 | 5.1863 | 0.4965  | 0.262281 |
| <i>4932702P03Rik</i> | chr13:24905592-24914272   | 0.1751 | 0.2487 | 0.5064  | 0.373968 |
| <i>Ly86</i>          | chr13:37345344-37419036   | 0.7747 | 2.2916 | 1.5646  | 0.005923 |
| <i>Dsp</i>           | chr13:38151327-38198577   | 0.0853 | 0.1657 | 0.9578  | 0.290364 |
| <i>Mir23b</i>        | chr13:63300471-63300568   | 5.7011 | 8.9151 | 0.6450  | 0.122970 |
| <i>Gm16132</i>       | chr13:63376760-63381045   | 0.7163 | 0.3628 | -0.9813 | 0.091329 |
| <i>Gm8399</i>        | chr13:81064683-81065803   | 0.4630 | 0.3193 | -0.5364 | 0.251801 |
| <i>Gm22574</i>       | chr13:86044988-86045048   | 7.7231 | 5.3500 | -0.5296 | 0.441827 |
| <i>Gm8546</i>        | chr13:89577154-89578413   | 0.6298 | 0.4315 | -0.5456 | 0.154793 |
| <i>Rps3a3</i>        | chr13:108670579-108671440 | 0.7306 | 0.6198 | -0.2373 | 0.631171 |
| <i>Ccdc146</i>       | chr5:21292960-21424677    | 0.1325 | 0.1401 | 0.0809  | 0.837252 |
| <i>Gm25767</i>       | chr5:36671657-36671781    | 2.7266 | 3.5957 | 0.3991  | 0.623344 |
| <i>Gm7854</i>        | chr5:43235001-43235352    | 1.4721 | 1.2426 | -0.2445 | 0.782603 |
| <i>Gm5555</i>        | chr5:49552256-49553270    | 0.6751 | 0.4900 | -0.4624 | 0.366185 |
| <i>Ociad2</i>        | chr5:73322198-73338947    | 0.3280 | 0.5263 | 0.6821  | 0.242228 |
| <i>Gm6583</i>        | chr5:112353800-112356033  | 0.1934 | 0.3042 | 0.6532  | 0.162560 |
| <i>Gm13831</i>       | chr5:115263092-115263394  | 2.3496 | 1.9776 | -0.2487 | 0.669385 |
| <i>Gm15860</i>       | chr5:123334331-123344437  | 0.6057 | 0.4799 | -0.3360 | 0.599645 |
| <i>Gm25315</i>       | chr5:135207987-135208108  | 2.5719 | 4.0055 | 0.6391  | 0.280607 |
| <i>Gm15607</i>       | chr5:135637138-135637496  | 1.4395 | 2.0284 | 0.4948  | 0.403232 |
| <i>Gm20485</i>       | chr5:136863636-136869722  | 1.0457 | 1.4630 | 0.4844  | 0.358551 |
| <i>Fscn1</i>         | chr5:142960342-142973185  | 0.1257 | 0.2197 | 0.8054  | 0.265037 |
| <i>0610040B10Rik</i> | chr5:143329246-143332704  | 1.5731 | 1.5455 | -0.0256 | 0.948828 |
| <i>Rps10-ps4</i>     | chr5:147100561-147101053  | 0.8794 | 0.3175 | -1.4699 | 0.147985 |
| <i>Mtus2</i>         | chr5:147957319-148316065  | 0.1056 | 0.2182 | 1.0476  | 0.426816 |
| <i>Gm8428</i>        | chr6:8377595-8379379      | 0.2848 | 0.4119 | 0.5323  | 0.377550 |
| <i>Gm15473</i>       | chr6:17058805-17064996    | 0.6938 | 0.7512 | 0.1145  | 0.654952 |
| <i>Rpl30-ps1</i>     | chr6:38376806-38377154    | 1.4446 | 1.5947 | 0.1427  | 0.676395 |
| <i>Klrg2</i>         | chr6:38626659-38637239    | 0.3331 | 0.3225 | -0.0467 | 0.927258 |
| <i>Fth-ps2</i>       | chr6:39653449-39653965    | 1.4914 | 2.2384 | 0.5858  | 0.016073 |
| <i>Hotairm1</i>      | chr6:52156901-52162119    | 0.9299 | 1.0395 | 0.1608  | 0.734436 |
| <i>Fkbp9</i>         | chr6:56832058-56879358    | 0.1671 | 0.2167 | 0.3745  | 0.443210 |
| <i>Sftpb</i>         | chr6:72304609-72314371    | 0.1660 | 0.2065 | 0.3152  | 0.521925 |
| <i>Grip2</i>         | chr6:91761508-91827250    | 0.1085 | 0.0906 | -0.2589 | 0.725950 |
| <i>Gm15531</i>       | chr6:97890287-97890539    | 3.2483 | 3.4399 | 0.0827  | 0.881887 |
| <i>Cpne9</i>         | chr6:113282306-113305627  | 0.0942 | 0.0664 | -0.5042 | 0.134273 |

|                      |                          |         |         |         |          |
|----------------------|--------------------------|---------|---------|---------|----------|
| <i>Ninj2</i>         | chr6:120093349-120200339 | 0.6061  | 0.4923  | -0.3000 | 0.431334 |
| <i>Gm24592</i>       | chr6:120381033-120381139 | 2.8859  | 3.0533  | 0.0813  | 0.922596 |
| <i>Gm10069</i>       | chr6:128438756-128475617 | 0.1727  | 0.0896  | -0.9471 | 0.335453 |
| <i>Klri1</i>         | chr6:129697217-129717132 | 0.9323  | 2.1726  | 1.2206  | 0.071332 |
| <i>Smco3</i>         | chr6:136829926-136835452 | 0.2458  | 0.2095  | -0.2306 | 0.688194 |
| <i>Gm766</i>         | chr6:142785203-142804502 | 0.1984  | 0.1028  | -0.9487 | 0.217053 |
| <i>Tmtc1</i>         | chr6:148232429-148444389 | 0.1058  | 0.2104  | 0.9914  | 0.023025 |
| <i>Gm21814</i>       | chr6:149582011-149583656 | 1.7703  | 2.2021  | 0.3149  | 0.391092 |
| <i>D030047H15Rik</i> | chr7:4126339-4136926     | 0.2452  | 0.1702  | -0.5266 | 0.366529 |
| <i>Gm16306</i>       | chr7:6399053-6399636     | 1.7574  | 0.6360  | -1.4663 | 0.245298 |
| <i>Gm15877</i>       | chr7:12517404-12518368   | 0.3528  | 0.3319  | -0.0881 | 0.888103 |
| <i>Slc27a5</i>       | chr7:12988345-12998192   | 0.2250  | 0.2064  | -0.1245 | 0.808944 |
| <i>Gm4879</i>        | chr7:13178902-13180174   | 0.5167  | 0.3915  | -0.4002 | 0.409655 |
| <i>Zfp111</i>        | chr7:24193946-24211443   | 0.0601  | 0.0641  | 0.0927  | 0.826101 |
| <i>Ppp1r14a</i>      | chr7:29289319-29293390   | 1.2414  | 0.9999  | -0.3121 | 0.463366 |
| <i>Gm6096</i>        | chr7:34251037-34251493   | 1.9695  | 2.1309  | 0.1136  | 0.650094 |
| <i>Zfp536</i>        | chr7:37472134-37773641   | 0.1704  | 0.0109  | -3.9686 | 0.057599 |
| <i>Snord88a</i>      | chr7:44250134-44250224   | 10.6185 | 13.1156 | 0.3047  | 0.373411 |
| <i>Mamstr</i>        | chr7:45639976-45646521   | 0.1498  | 0.1155  | -0.3751 | 0.415283 |
| <i>Spaca4</i>        | chr7:45725106-45725816   | 0.5627  | 0.2656  | -1.0831 | 0.192375 |
| <i>Syngn4</i>        | chr7:45885221-45896714   | 0.5939  | 0.6836  | 0.2029  | 0.590732 |
| <i>Gm7580</i>        | chr7:74392697-74411233   | 1.8324  | 2.4001  | 0.3893  | 0.421424 |
| <i>Tll13</i>         | chr7:80246375-80260821   | 0.1634  | 0.1160  | -0.4947 | 0.273776 |
| <i>Gm6415</i>        | chr7:81161396-81161744   | 1.8499  | 2.3883  | 0.3685  | 0.228052 |
| <i>Gm7180</i>        | chr7:81222361-81222874   | 1.9815  | 1.4894  | -0.4119 | 0.368944 |
| <i>Homer2</i>        | chr7:81600480-81706925   | 0.0386  | 0.0689  | 0.8369  | 0.222721 |
| <i>Gm10605</i>       | chr7:99625935-99631711   | 0.1103  | 0.1341  | 0.2821  | 0.723797 |
| <i>Gm4887</i>        | chr7:104821203-104822256 | 0.6616  | 0.8149  | 0.3006  | 0.349503 |
| <i>Gm22504</i>       | chr7:105642337-105642476 | 4.7915  | 3.2453  | -0.5621 | 0.406070 |
| <i>1700069B07Rik</i> | chr7:121707188-121708011 | 0.8168  | 0.3940  | -1.0519 | 0.034480 |
| <i>Gm26414</i>       | chr7:122446857-122447126 | 1.5960  | 1.8869  | 0.2415  | 0.744662 |
| <i>Snora30</i>       | chr7:127527873-127528003 | 7.0041  | 7.5524  | 0.1087  | 0.831471 |
| <i>Dmbt1</i>         | chr7:131032075-131121626 | 0.0642  | 0.0173  | -1.8888 | 0.142857 |
| <i>Sprn</i>          | chr7:140150627-140154877 | 0.1187  | 0.0946  | -0.3262 | 0.693689 |
| <i>lfitm5</i>        | chr7:140948962-140950239 | 1.1124  | 1.2474  | 0.1653  | 0.787014 |
| <i>lfitm2</i>        | chr7:140954838-140955961 | 0.9614  | 1.5866  | 0.7227  | 0.256754 |
| <i>lfitm3</i>        | chr7:141009585-141010770 | 1.1376  | 1.9673  | 0.7902  | 0.081071 |
| <i>Gm15580</i>       | chr7:143596438-143596994 | 0.7392  | 0.7725  | 0.0634  | 0.875069 |
| <i>BC068157</i>      | chr8:4209542-4217459     | 0.2177  | 0.2813  | 0.3696  | 0.387543 |
| <i>Smim18</i>        | chr8:33742113-33747770   | 0.9504  | 0.8410  | -0.1764 | 0.664853 |
| <i>Gm9755</i>        | chr8:67513999-67515606   | 0.2982  | 0.3614  | 0.2772  | 0.568320 |
| <i>Lrrc25</i>        | chr8:70616843-70620850   | 0.2303  | 0.4565  | 0.9874  | 0.250006 |
| <i>Large</i>         | chr8:72814598-73353540   | 0.0707  | 0.1318  | 0.8994  | 0.055728 |
| <i>Gm25506</i>       | chr8:85050206-85050276   | 3.6776  | 0.9915  | -1.8911 | 0.243622 |
| <i>Crnde</i>         | chr8:92326037-92356120   | 0.1863  | 0.0962  | -0.9526 | 0.252052 |
| <i>Gm8730</i>        | chr8:102864778-102865853 | 0.6106  | 0.6998  | 0.1965  | 0.630311 |
| <i>Nrn1l</i>         | chr8:105893566-105895023 | 0.8593  | 0.7420  | -0.2117 | 0.762108 |
| <i>Mtss1l</i>        | chr8:110721475-110741400 | 0.1088  | 0.1223  | 0.1691  | 0.685903 |
| <i>Gm6793</i>        | chr8:112013432-112015036 | 0.2889  | 0.4245  | 0.5551  | 0.207159 |
| <i>Vstm5</i>         | chr9:15239044-15259393   | 0.1553  | 0.2589  | 0.7371  | 0.334116 |
| <i>Gm7808</i>        | chr9:19927895-19928282   | 1.1600  | 1.2135  | 0.0650  | 0.908961 |
| <i>Icam5</i>         | chr9:21032037-21039036   | 0.3355  | 0.3225  | -0.0573 | 0.918311 |
| <i>Gm26592</i>       | chr9:21034289-21037782   | 0.2288  | 0.2610  | 0.1900  | 0.722527 |
| <i>Gm20519</i>       | chr9:21533626-21533985   | 1.3641  | 1.0891  | -0.3248 | 0.393296 |
| <i>Eepd1</i>         | chr9:25481546-25604110   | 0.1935  | 0.3355  | 0.7943  | 0.102325 |
| <i>Scn3b</i>         | chr9:40269215-40291618   | 0.1189  | 0.1149  | -0.0495 | 0.912656 |
| <i>C1qtnf5</i>       | chr9:44107244-44109187   | 0.4986  | 0.3044  | -0.7122 | 0.157398 |
| <i>Zbtb16</i>        | chr9:48654310-48835945   | 0.1085  | 0.1650  | 0.6043  | 0.106539 |
| <i>Gm22304</i>       | chr9:53639976-53640105   | 5.1615  | 5.1718  | 0.0029  | 0.993488 |
| <i>AY074887</i>      | chr9:54950265-54950954   | 0.6217  | 0.7595  | 0.2890  | 0.676465 |
| <i>Gm23344</i>       | chr9:64175047-64175115   | 7.1607  | 6.5660  | -0.1251 | 0.845525 |
| <i>Snord16a</i>      | chr9:64175422-64175521   | 7.7051  | 8.2520  | 0.0989  | 0.670408 |
| <i>4930509E16Rik</i> | chr9:72518261-72531858   | 0.4452  | 0.2135  | -1.0604 | 0.091765 |
| <i>Filip1</i>        | chr9:79815050-79977804   | 0.0698  | 0.0979  | 0.4870  | 0.489552 |
| <i>4930579K19Rik</i> | chr9:98562959-98563611   | 1.1416  | 1.1661  | 0.0306  | 0.946297 |
| <i>Mir135a-1</i>     | chr9:106154123-106154213 | 6.5661  | 6.7926  | 0.0489  | 0.804281 |
| <i>NA</i>            | chr9:108104964-108118343 | 0.3163  | 0.3207  | 0.0202  | 0.945656 |
| <i>Xylb</i>          | chr9:119357380-119393797 | 0.1625  | 0.2256  | 0.4729  | 0.158716 |
| <i>Lyz14</i>         | chr9:121577842-121642096 | 0.7077  | 0.6008  | -0.2364 | 0.614412 |
| <i>Gm17021</i>       | chr9:123772184-123790939 | 1.4372  | 2.1727  | 0.5962  | 0.047416 |
| <i>Kcnd1</i>         | chrX:7822288-7838280     | 0.1178  | 0.1149  | -0.0358 | 0.953809 |

|                      |                           |        |         |          |          |
|----------------------|---------------------------|--------|---------|----------|----------|
| <i>Snora69</i>       | chrX:37082911-37083042    | 5.5885 | 5.5129  | -0.0197  | 0.964405 |
| <i>Mir18b</i>        | chrX:52742330-52742413    | 4.8958 | 1.6898  | -1.5347  | 0.271921 |
| <i>Gm14584</i>       | chrX:53418330-53418967    | 1.3122 | 1.5223  | 0.2144   | 0.389700 |
| <i>Gm14686</i>       | chrX:74261031-74261374    | 1.7578 | 2.0050  | 0.1898   | 0.417550 |
| <i>Apoa</i>          | chrX:94367116-94417093    | 0.5677 | 0.9157  | 0.6898   | 0.049635 |
| <i>Tpt1-ps6</i>      | chrX:101768534-101769057  | 1.5872 | 1.1291  | -0.4913  | 0.352755 |
| <i>Gm15009</i>       | chrX:136802911-136803233  | 2.1600 | 2.8830  | 0.4166   | 0.166898 |
| <i>Gm15190</i>       | chrX:159584782-159585058  | 1.8112 | 0.8486  | -1.0938  | 0.184705 |
| <i>Arhgap6</i>       | chrX:168795098-169304435  | 0.0559 | 0.1016  | 0.8621   | 0.238012 |
| <i>Gm24500</i>       | chr15:34139252-34139376   | 6.8901 | 5.3473  | -0.3657  | 0.405411 |
| <i>Gm22488</i>       | chr15:58146615-58146742   | 3.6140 | 2.7209  | -0.4095  | 0.543843 |
| <i>Gm20717</i>       | chr15:64098316-64100886   | 1.7383 | 1.9066  | 0.1333   | 0.740286 |
| <i>Oc90</i>          | chr15:65876052-65912397   | 0.2809 | 0.3891  | 0.4704   | 0.262405 |
| <i>Mir30b</i>        | chr15:68337414-68337510   | 2.4467 | 2.7622  | 0.1750   | 0.855221 |
| <i>Gm17189</i>       | chr15:74784064-74800640   | 0.3673 | 0.1709  | -1.1038  | 0.274711 |
| <i>Spatc1</i>        | chr15:76268088-76292572   | 0.3564 | 0.3522  | -0.0171  | 0.957737 |
| <i>Apol7c</i>        | chr15:77524866-77533315   | 0.4296 | 1.5076  | 1.8111   | 0.168860 |
| <i>Gm6612</i>        | chr15:80952504-80952899   | 1.3639 | 1.5931  | 0.2242   | 0.577204 |
| <i>Shisa8</i>        | chr15:82206951-82212815   | 0.3540 | 0.1816  | -0.9633  | 0.203918 |
| <i>Gm26760</i>       | chr15:92344358-92378088   | 0.1690 | 0.0001  | -10.7229 | 0.275999 |
| <i>Snora2b</i>       | chr15:98526345-98526482   | 5.9355 | 8.2638  | 0.4774   | 0.210886 |
| <i>Troap</i>         | chr15:99074972-99083407   | 0.3510 | 0.2948  | -0.2518  | 0.480207 |
| <i>Gpd1</i>          | chr15:99717514-99725005   | 0.3069 | 0.4049  | 0.3997   | 0.538252 |
| <i>Gm5475</i>        | chr15:100422146-100428150 | 0.1586 | 0.1881  | 0.2469   | 0.353996 |
| <i>Smagp</i>         | chr15:100621341-100636865 | 0.8242 | 0.9811  | 0.2513   | 0.620536 |
| <i>6030408B16Rik</i> | chr15:101293211-101296615 | 0.2944 | 0.1964  | -0.5841  | 0.469281 |
| <i>Gm3739</i>        | chr14:7293647-7315049     | 0.2515 | 0.3699  | 0.5569   | 0.226648 |
| <i>4930452B06Rik</i> | chr14:8431191-8666240     | 0.2148 | 0.2328  | 0.1159   | 0.793079 |
| <i>Gm25328</i>       | chr14:20701522-20701629   | 8.1529 | 10.2193 | 0.3259   | 0.437210 |
| <i>Snord8</i>        | chr14:52209784-52209894   | 7.2221 | 8.0134  | 0.1500   | 0.685754 |
| <i>Trav1</i>         | chr14:52427927-52428874   | 1.6288 | 1.8377  | 0.1741   | 0.785593 |
| <i>Trav7d-3</i>      | chr14:52744248-52744839   | 1.2694 | 1.2600  | -0.0107  | 0.989681 |
| <i>Trav8d-1</i>      | chr14:52778446-52778994   | 1.3633 | 2.1148  | 0.6334   | 0.156037 |
| <i>Trav9d-1</i>      | chr14:52792207-52792776   | 0.9723 | 0.7309  | -0.4117  | 0.418003 |
| <i>Trav16d-dv11</i>  | chr14:53047286-53047821   | 1.7317 | 2.2850  | 0.4000   | 0.535781 |
| <i>Trav6-5</i>       | chr14:53491114-53491620   | 1.8132 | 1.0560  | -0.7799  | 0.099408 |
| <i>Gm20687</i>       | chr14:55056177-55072397   | 0.7742 | 1.2044  | 0.6374   | 0.364093 |
| <i>Gm5801</i>        | chr14:56010535-56011351   | 0.6533 | 0.4764  | -0.4555  | 0.488942 |
| <i>Gm26440</i>       | chr14:57697808-57697937   | 2.6461 | 3.8309  | 0.5338   | 0.375644 |
| <i>C1qtnf9</i>       | chr14:60768133-60780869   | 0.5139 | 0.6976  | 0.4409   | 0.185050 |
| <i>Mir15a</i>        | chr14:61632026-61632110   | 7.0184 | 10.8994 | 0.6350   | 0.046364 |
| <i>Dleu7</i>         | chr14:62276230-62292979   | 0.6109 | 0.5474  | -0.1584  | 0.729621 |
| <i>Serpine3</i>      | chr14:62663666-62692243   | 0.6910 | 0.7789  | 0.1728   | 0.603776 |
| <i>Pbk</i>           | chr14:65805836-65817822   | 0.5092 | 1.0592  | 1.0568   | 0.152465 |
| <i>Timm8a2</i>       | chr14:122034673-122038420 | 0.7830 | 0.6786  | -0.2064  | 0.763759 |
| <i>Ccr6</i>          | chr17:8236042-8257127     | 0.2477 | 0.2727  | 0.1391   | 0.719487 |
| <i>Prr18</i>         | chr17:8340405-8344112     | 0.2588 | 0.0918  | -1.4957  | 0.015611 |
| <i>Gm23833</i>       | chr17:12770630-12770882   | 4.0536 | 4.1862  | 0.0464   | 0.894005 |
| <i>Pnlcd1</i>        | chr17:12888901-12910000   | 0.3943 | 0.3845  | -0.0364  | 0.904956 |
| <i>NA</i>            | chr17:15010265-15022448   | 0.3359 | 0.3074  | -0.1277  | 0.733658 |
| <i>Abca17</i>        | chr17:24264258-24351029   | 0.0943 | 0.0867  | -0.1214  | 0.873151 |
| <i>Snord60</i>       | chr17:24528475-24528553   | 5.9593 | 9.2879  | 0.6402   | 0.320807 |
| <i>Tcp11</i>         | chr17:28066746-28080639   | 0.3556 | 0.4611  | 0.3746   | 0.450313 |
| <i>Cbs</i>           | chr17:31612622-31637199   | 0.1167 | 0.1678  | 0.5238   | 0.456697 |
| <i>Aif1</i>          | chr17:35170990-35176068   | 0.5115 | 0.4803  | -0.0906  | 0.804654 |
| <i>RspH9</i>         | chr17:46122034-46144216   | 0.3926 | 0.5140  | 0.3886   | 0.238886 |
| <i>Prickle4</i>      | chr17:47688516-47694736   | 0.3667 | 0.3066  | -0.2581  | 0.608227 |
| <i>Mettl4-ps1</i>    | chr17:71526895-71556543   | 0.2234 | 0.3938  | 0.8178   | 0.242733 |
| <i>Gm17538</i>       | chr17:77674375-77674702   | 1.4830 | 1.1073  | -0.4214  | 0.472534 |
| <i>Gm25706</i>       | chr17:80196157-80196404   | 2.6396 | 1.9239  | -0.4563  | 0.386912 |
| <i>Slc8a1</i>        | chr17:81388690-81649607   | 0.2933 | 0.3912  | 0.4158   | 0.298712 |
| <i>C430042M11Rik</i> | chr17:83851674-83854393   | 0.2027 | 0.2331  | 0.2020   | 0.815988 |
| <i>Gm15835</i>       | chr16:4777742-4779454     | 3.2090 | 3.2787  | 0.0310   | 0.928891 |
| <i>Gm6305</i>        | chr16:11190253-11191265   | 0.6751 | 0.5728  | -0.2371  | 0.598336 |
| <i>Gm15798</i>       | chr16:18944257-18944665   | 1.5331 | 1.6438  | 0.1006   | 0.806790 |
| <i>Iglv1</i>         | chr16:19085016-19085460   | 1.8205 | 0.1459  | -3.6416  | 0.310487 |
| <i>Gm15760</i>       | chr16:20545917-20546200   | 1.5457 | 1.1916  | -0.3753  | 0.516520 |
| <i>Gm9816</i>        | chr16:62716952-62718810   | 0.2794 | 0.2063  | -0.4376  | 0.528340 |
| <i>Gm23692</i>       | chr16:94429072-94429232   | 3.4453 | 3.1072  | -0.1490  | 0.822571 |
| <i>Lca5l</i>         | chr16:96158406-96192257   | 0.0502 | 0.0722  | 0.5260   | 0.435554 |
| <i>C030010L15Rik</i> | chr16:97994600-97997419   | 1.1279 | 0.9724  | -0.2140  | 0.597049 |

|                      |                          |         |         |         |          |
|----------------------|--------------------------|---------|---------|---------|----------|
| <i>Peli3</i>         | chr19:4930650-4943127    | 0.1814  | 0.1657  | -0.1306 | 0.884997 |
| <i>Lgals12</i>       | chr19:7596659-7607193    | 0.2469  | 0.3281  | 0.4099  | 0.296328 |
| <i>A930007119Rik</i> | chr19:29486354-29523159  | 0.1621  | 0.2063  | 0.3478  | 0.554079 |
| <i>Sfrp5</i>         | chr19:42197970-42202252  | 0.2283  | 0.1809  | -0.3354 | 0.693217 |
| <i>Kazald1</i>       | chr19:45075240-45079289  | 0.3725  | 0.2249  | -0.7275 | 0.019292 |
| <i>4930505N22Rik</i> | chr19:45998136-46013386  | 1.0252  | 0.6716  | -0.6104 | 0.312309 |
| <i>Snora19</i>       | chr19:60774329-60774461  | 2.5644  | 1.2160  | -1.0765 | 0.248465 |
| <i>Stau2</i>         | chr1:16228673-16520112   | 0.0720  | 0.1332  | 0.8888  | 0.123891 |
| <i>Bend6</i>         | chr1:33852051-33907816   | 0.2408  | 0.2366  | -0.0255 | 0.954329 |
| <i>Gm5976</i>        | chr1:52503233-52504229   | 0.9717  | 0.9384  | -0.0503 | 0.866121 |
| <i>Gm6822</i>        | chr1:55160739-55161053   | 1.7230  | 0.8427  | -1.0318 | 0.072914 |
| <i>Als2cr12</i>      | chr1:58658116-58695989   | 0.4117  | 0.5338  | 0.3749  | 0.448785 |
| <i>Rps27-ps1</i>     | chr1:63073773-63074019   | 1.8773  | 2.9084  | 0.6315  | 0.131537 |
| <i>Gm13748</i>       | chr1:64078653-64090782   | 2.7854  | 2.8543  | 0.0352  | 0.956544 |
| <i>2810408111Rik</i> | chr1:64679870-64690659   | 0.5652  | 0.5629  | -0.0060 | 0.990684 |
| <i>Gm8812</i>        | chr1:66062964-66063376   | 1.5637  | 1.3752  | -0.1854 | 0.472737 |
| <i>Cyp27a1</i>       | chr1:74713573-74737890   | 0.5627  | 1.2335  | 1.1322  | 0.061908 |
| <i>Pid1</i>          | chr1:84036295-84364180   | 0.0788  | 0.1242  | 0.6570  | 0.109852 |
| <i>Rbm44</i>         | chr1:91145102-91170795   | 0.1180  | 0.5122  | 2.1178  | 0.186640 |
| <i>Gm7785</i>        | chr1:91296044-91296936   | 0.7422  | 1.0404  | 0.4874  | 0.176423 |
| <i>Gm16305</i>       | chr1:138991549-138992021 | 1.5644  | 1.8110  | 0.2112  | 0.718235 |
| <i>A230059L01Rik</i> | chr1:146802964-146806022 | 0.3078  | 0.4349  | 0.4984  | 0.676645 |
| <i>Gm15429</i>       | chr1:161725535-161727682 | 0.3786  | 0.2424  | -0.6435 | 0.139815 |
| <i>Fcgr4</i>         | chr1:171018919-171029761 | 0.3463  | 0.2734  | -0.3411 | 0.680978 |
| <i>Slamf8</i>        | chr1:172581376-172590568 | 0.2536  | 0.5016  | 0.9837  | 0.147893 |
| <i>Opn3</i>          | chr1:175662420-175692776 | 0.5331  | 0.4997  | -0.0933 | 0.805378 |
| <i>Gm23690</i>       | chr1:181813606-181813700 | 4.7861  | 3.6760  | -0.3807 | 0.463163 |
| <i>A430105J06Rik</i> | chr1:186749395-186752921 | 0.9497  | 0.7723  | -0.2983 | 0.495005 |
| <i>Atf3</i>          | chr1:191170295-191183340 | 0.1814  | 0.2369  | 0.3855  | 0.533129 |
| <i>B4gal6</i>        | chr18:20684598-20746404  | 0.0733  | 0.1149  | 0.6479  | 0.099272 |
| <i>3222401L13Rik</i> | chr18:37655906-37658737  | 0.2198  | 0.1670  | -0.3969 | 0.649951 |
| <i>Tex43</i>         | chr18:56588349-56594782  | 0.5090  | 0.4208  | -0.2744 | 0.600765 |
| <i>Gm26403</i>       | chr18:61138508-61138613  | 5.0703  | 4.5827  | -0.1459 | 0.651571 |
| <i>NA</i>            | chr18:67782504-67782756  | 1.8598  | 2.1584  | 0.2148  | 0.720210 |
| <i>Ska1</i>          | chr18:74195298-74207818  | 0.3203  | 0.2779  | -0.2049 | 0.745417 |
| <i>Gm13192</i>       | chr2:4959542-4959752     | 3.0906  | 1.5617  | -0.9848 | 0.032429 |
| <i>Gm26073</i>       | chr2:10473350-10473477   | 4.9254  | 2.3686  | -1.0562 | 0.145335 |
| <i>Gm25753</i>       | chr2:10502390-10502511   | 4.5943  | 3.8120  | -0.2693 | 0.398081 |
| <i>A930004D18Rik</i> | chr2:18025192-18037737   | 0.1736  | 0.2107  | 0.2792  | 0.399915 |
| <i>Gm13349</i>       | chr2:18338578-18338989   | 1.8213  | 1.9442  | 0.0942  | 0.814407 |
| <i>Gm13433</i>       | chr2:25543478-25543718   | 4.8019  | 5.7593  | 0.2623  | 0.543028 |
| <i>Mir2861</i>       | chr2:32712806-32712888   | 6.5040  | 2.1089  | -1.6248 | 0.044056 |
| <i>NA</i>            | chr2:32712899-32712972   | 6.7202  | 6.6002  | -0.0260 | 0.959019 |
| <i>Gm13556</i>       | chr2:38286254-38287291   | 2.1085  | 1.9020  | -0.1487 | 0.769660 |
| <i>Nr6a1os</i>       | chr2:38823256-38852370   | 0.4958  | 0.5080  | 0.0352  | 0.929573 |
| <i>Gm13453</i>       | chr2:40127503-40127860   | 1.8908  | 1.0719  | -0.8188 | 0.093696 |
| <i>A430018G15Rik</i> | chr2:52425011-52434885   | 0.4701  | 0.6105  | 0.3769  | 0.416563 |
| <i>Fap</i>           | chr2:62500942-62574075   | 0.1973  | 0.2520  | 0.3531  | 0.612223 |
| <i>Gm13666</i>       | chr2:73131744-73132543   | 1.0834  | 0.7511  | -0.5285 | 0.249775 |
| <i>Gm13703</i>       | chr2:73357267-73364333   | 1.2412  | 2.3321  | 0.9100  | 0.056402 |
| <i>Mir1955</i>       | chr2:92191976-92192074   | 10.5433 | 8.6813  | -0.2803 | 0.522165 |
| <i>Gm22676</i>       | chr2:112500868-112500997 | 2.4269  | 2.1813  | -0.1539 | 0.845104 |
| <i>Gm21596</i>       | chr2:113919246-113920562 | 0.3543  | 0.3607  | 0.0258  | 0.960054 |
| <i>Gm14088</i>       | chr2:119008208-119008477 | 1.2123  | 0.8289  | -0.5484 | 0.466439 |
| <i>Trim69</i>        | chr2:122160699-122179027 | 0.1909  | 0.2482  | 0.3792  | 0.573428 |
| <i>Gm14025</i>       | chr2:129038144-129048172 | 0.1710  | 0.1082  | -0.6612 | 0.607688 |
| <i>Gm14023</i>       | chr2:129297369-129307826 | 0.3607  | 0.4269  | 0.2429  | 0.650235 |
| <i>Gm14049</i>       | chr2:130987983-130988619 | 1.0635  | 1.0344  | -0.0400 | 0.890694 |
| <i>Gm14051</i>       | chr2:132144532-132220250 | 1.2684  | 0.6191  | -1.0348 | 0.085059 |
| <i>Gm14068</i>       | chr2:140044491-140044704 | 2.0742  | 1.6496  | -0.3304 | 0.728152 |
| <i>Gm26165</i>       | chr2:144261588-144261726 | 11.6922 | 11.4241 | -0.0335 | 0.948029 |
| <i>Gm14122</i>       | chr2:150398255-150399399 | 0.5627  | 0.6685  | 0.2486  | 0.632224 |
| <i>Efcab8</i>        | chr2:153780878-153844752 | 0.1807  | 0.1792  | -0.0122 | 0.960980 |
| <i>Gm14198</i>       | chr2:154630001-154632636 | 0.9409  | 0.7316  | -0.3631 | 0.534313 |
| <i>Rpl21-ps9</i>     | chr2:156386740-156387222 | 0.8798  | 0.8119  | -0.1159 | 0.851150 |
| <i>Gm14277</i>       | chr2:157168819-157169179 | 1.7814  | 2.1320  | 0.2592  | 0.141445 |
| <i>Fam83d</i>        | chr2:158768092-158786637 | 0.2125  | 0.2880  | 0.4385  | 0.336940 |
| <i>Gm11465</i>       | chr2:165880024-165882056 | 1.1094  | 1.6208  | 0.5470  | 0.282916 |
| <i>Gm14270</i>       | chr2:170285034-170285880 | 0.7970  | 0.9110  | 0.1930  | 0.606136 |
| <i>Tubb1</i>         | chr2:174450694-174457882 | 0.3010  | 0.2253  | -0.4175 | 0.561731 |
| <i>Gm14443</i>       | chr2:175166254-175175871 | 0.1611  | 0.1150  | -0.4866 | 0.387719 |

|               |                           |         |         |         |          |
|---------------|---------------------------|---------|---------|---------|----------|
| BC051628      | chr2:181220012-181222854  | 0.4534  | 0.3147  | -0.5267 | 0.224526 |
| Gm5466        | chr2:181896822-181898712  | 0.4481  | 0.6064  | 0.4366  | 0.379525 |
| mt-Tl1        | chrM:2675-2750            | 9.6010  | 18.4901 | 0.9455  | 0.042862 |
| Gm15466       | chr3:8882237-8882570      | 1.3309  | 0.8763  | -0.6028 | 0.350461 |
| Il2           | chr3:37120522-37125959    | 0.4521  | 0.6411  | 0.5041  | 0.298246 |
| Gm10254       | chr3:54810563-54811250    | 1.1063  | 0.8461  | -0.3868 | 0.454415 |
| Rarres1       | chr3:67478885-67515523    | 0.2941  | 0.3627  | 0.3023  | 0.652356 |
| Gm17213       | chr3:69431008-69432368    | 0.2398  | 0.0752  | -1.6739 | 0.174182 |
| Gm17146       | chr3:88722089-88722670    | 0.8678  | 0.8606  | -0.0120 | 0.991313 |
| Muc1          | chr3:89229056-89233381    | 0.3113  | 0.3021  | -0.0433 | 0.882850 |
| Gm16540       | chr3:90057258-90058380    | 1.6445  | 2.6787  | 0.7039  | 0.058829 |
| 1700040D17Rik | chr3:94409394-94412883    | 0.9377  | 0.4438  | -1.0794 | 0.038487 |
| Anxa9         | chr3:95296095-95307176    | 0.4423  | 0.5482  | 0.3097  | 0.494862 |
| Hist2h3c2     | chr3:96238109-96239127    | 0.5581  | 0.3441  | -0.6978 | 0.349512 |
| Gm6485        | chr3:104752726-104753165  | 1.6231  | 2.7800  | 0.7763  | 0.192378 |
| Gm4540        | chr3:106034661-106035056  | 1.8576  | 2.2240  | 0.2597  | 0.682463 |
| Gnat2         | chr3:108092788-108101432  | 0.2079  | 0.2516  | 0.2757  | 0.443347 |
| Alpk1         | chr3:127670398-127780527  | 0.1334  | 0.2029  | 0.6052  | 0.024529 |
| Tifa          | chr3:127789871-127832135  | 0.2346  | 0.4972  | 1.0838  | 0.105108 |
| Slc9b1        | chr3:135348028-135397827  | 0.2005  | 0.2500  | 0.3183  | 0.420737 |
| Syde2         | chr3:145987869-146021720  | 0.1042  | 0.1283  | 0.3013  | 0.544433 |
| Rpsa-ps10     | chr3:150072589-150073620  | 0.7217  | 0.9411  | 0.3828  | 0.443696 |
| Snord45b      | chr3:153910562-153910633  | 14.3403 | 12.7966 | -0.1643 | 0.623129 |
| Gm26857       | chr4:3678116-3689548      | 0.1599  | 0.2680  | 0.7455  | 0.187437 |
| Gm10604       | chr4:11979559-11981265    | 0.6337  | 0.7919  | 0.3215  | 0.475926 |
| Gm11935       | chr4:33452490-33452889    | 1.5983  | 1.9438  | 0.2824  | 0.521899 |
| Gm12503       | chr4:44092631-44109311    | 0.2916  | 0.1716  | -0.7653 | 0.149289 |
| Shb           | chr4:45423277-45532470    | 0.1988  | 0.1630  | -0.2864 | 0.566034 |
| Gm22247       | chr4:46495154-46495285    | 4.4752  | 5.1083  | 0.1909  | 0.559927 |
| Gm12538       | chr4:57413710-57414196    | 1.3198  | 1.3835  | 0.0680  | 0.787368 |
| Bspry         | chr4:62480052-62497298    | 0.3934  | 0.5193  | 0.4003  | 0.533398 |
| Gm11211       | chr4:62723515-62727537    | 0.9230  | 1.2172  | 0.3992  | 0.603201 |
| C630043F03Rik | chr4:72201347-72215352    | 0.1527  | 0.2028  | 0.4096  | 0.465444 |
| Gm12912       | chr4:75147608-75148989    | 0.3206  | 0.5575  | 0.7982  | 0.035360 |
| 4930553M12Rik | chr4:88867881-88868379    | 1.2928  | 1.7100  | 0.4035  | 0.442162 |
| Gm12786       | chr4:107017934-107022499  | 1.6381  | 1.4227  | -0.2033 | 0.634464 |
| Gm12739       | chr4:108484170-108484552  | 2.2416  | 2.9418  | 0.3922  | 0.166354 |
| 4930538K18Rik | chr4:119205106-119218217  | 0.3906  | 0.3612  | -0.1131 | 0.762923 |
| Rimk1a        | chr4:119465282-119492628  | 0.1638  | 0.0698  | -1.2304 | 0.128129 |
| Gm12959       | chr4:119553655-119554058  | 0.9045  | 1.1324  | 0.3242  | 0.625539 |
| D130007C19Rik | chr4:123902128-123903634  | 0.3459  | 0.5584  | 0.6911  | 0.066533 |
| Csf3r         | chr4:126024549-126044440  | 0.2192  | 0.3990  | 0.8643  | 0.139751 |
| Bai2          | chr4:129984869-130022633  | 0.1337  | 0.1080  | -0.3072 | 0.424979 |
| Gm26716       | chr4:130824393-130826313  | 1.1269  | 1.6272  | 0.5300  | 0.109211 |
| Aunip         | chr4:134510998-134523927  | 0.7651  | 0.8375  | 0.1305  | 0.759647 |
| C1qb          | chr4:136880128-136886187  | 0.2182  | 0.0929  | -1.2322 | 0.403810 |
| Gm13047       | chr4:141084863-141085678  | 0.6105  | 0.5578  | -1.1302 | 0.870445 |
| Gm13039       | chr4:143166602-143167396  | 0.7874  | 0.6502  | -0.2762 | 0.529606 |
| Trmt112-ps2   | chr4:149457296-149457872  | 0.9278  | 0.4504  | -1.0428 | 0.071210 |
| Ctnnbip1      | chr4:149518235-149566437  | 0.2705  | 0.3841  | 0.5057  | 0.372615 |
| Prdm16        | chr4:154316124-154636873  | 0.3552  | 0.1103  | -1.6872 | 0.205869 |
| Plch2         | chr4:154983114-155056784  | 0.0623  | 0.0484  | -0.3638 | 0.461729 |
| Gabrd         | chr4:155384979-155398112  | 0.2983  | 0.2597  | -0.1998 | 0.906821 |
| C030017K20Rik | chr4:155451569-155466530  | 0.4081  | 0.3353  | -0.2831 | 0.864416 |
| Oit3          | chr10:59422957-59441778   | 0.2210  | 0.1606  | -0.4607 | 0.276483 |
| Phxr2         | chr10:99125516-99126321   | 0.8754  | 0.5009  | -0.8054 | 0.093990 |
| Tns3          | chr11:8431651-8664535     | 0.0445  | 0.1748  | 1.9726  | 0.007470 |
| Gm23582       | chr11:21249421-21249560   | 2.9217  | 5.5210  | 0.9181  | 0.142146 |
| Gm22121       | chr11:44469012-44469066   | 9.7521  | 7.2191  | -0.4339 | 0.410558 |
| Inca1         | chr11:70688360-70700155   | 0.4463  | 0.3794  | -0.2342 | 0.580270 |
| Gm12335       | chr11:75066435-75066762   | 1.6677  | 1.2630  | -0.4010 | 0.490451 |
| Serpinf2      | chr11:75431731-75439591   | 0.1835  | 0.0917  | -1.0013 | 0.259860 |
| Tlcd2         | chr11:75461714-75470899   | 0.3457  | 0.5896  | 0.7703  | 0.183918 |
| Gm15892       | chr11:88059065-88067476   | 0.4271  | 0.3867  | -0.1433 | 0.793711 |
| B4galnt2      | chr11:95865942-95914891   | 0.3089  | 0.2256  | -0.4536 | 0.539137 |
| Gjd3          | chr11:98982179-98983016   | 0.6979  | 0.3964  | -0.8161 | 0.145315 |
| Tns4          | chr11:99065677-99089306   | 0.0886  | 0.0912  | 0.0426  | 0.928491 |
| Gm11619       | chr11:101353308-101353545 | 2.4812  | 2.0607  | -0.2679 | 0.642388 |
| Gm25593       | chr11:101353341-101353437 | 4.4803  | 3.3524  | -0.4184 | 0.572980 |
| Rnu2-10       | chr11:101658237-101658428 | 3.7118  | 2.6845  | -0.4674 | 0.304023 |
| AF251705      | chr11:114996720-115001880 | 0.4242  | 0.5329  | 0.3290  | 0.624049 |

|                      |                           |        |        |          |          |
|----------------------|---------------------------|--------|--------|----------|----------|
| <i>Ppp1r27</i>       | chr11:120549978-120551132 | 0.5909 | 0.9296 | 0.6536   | 0.190852 |
| <i>Gm5786</i>        | chr12:59081018-59081900   | 0.6950 | 0.5181 | -0.4238  | 0.202658 |
| <i>Kcnh5</i>         | chr12:74897216-75177332   | 0.1459 | 0.1188 | -0.2959  | 0.383879 |
| <i>Gm16570</i>       | chr12:81589434-81589870   | 1.1285 | 1.6024 | 0.5058   | 0.513373 |
| <i>Gm26531</i>       | chr12:85962597-85979014   | 0.2188 | 0.1649 | -0.4080  | 0.593976 |
| <i>Noxred1</i>       | chr12:87221254-87233556   | 0.6570 | 0.5028 | -0.3861  | 0.392660 |
| <i>Bdkrb1</i>        | chr12:105603084-105605428 | 0.4172 | 0.3290 | -0.3430  | 0.541405 |
| <i>Ighv9-3</i>       | chr12:114140691-114141122 | 0.8535 | 0.0001 | -13.0592 | 0.355918 |
| <i>Gm5445</i>        | chr13:12378157-12378640   | 0.5289 | 0.2198 | -1.2667  | 0.467454 |
| <i>Hist1h2ae</i>     | chr13:23570516-23571220   | 1.1063 | 1.3666 | 0.3048   | 0.651896 |
| <i>Serpib1a</i>      | chr13:32842091-32851185   | 0.2918 | 0.4970 | 0.7681   | 0.320571 |
| <i>Gm17364</i>       | chr13:41273802-41273977   | 8.3735 | 9.0190 | 0.1071   | 0.887343 |
| <i>Gm4149</i>        | chr13:75644863-75645226   | 1.2304 | 0.9132 | -0.4302  | 0.495052 |
| <i>Actr3b</i>        | chr5:25759996-25850342    | 0.1884 | 0.0627 | -1.5867  | 0.271156 |
| <i>Gm7420</i>        | chr5:29217723-29218569    | 0.6209 | 0.4909 | -0.3388  | 0.402286 |
| <i>Gm5864</i>        | chr5:32420002-32420972    | 0.4053 | 0.5732 | 0.4998   | 0.408088 |
| <i>Gm15796</i>       | chr5:38507462-38507666    | 3.7129 | 2.9285 | -0.3424  | 0.474935 |
| <i>N4bp2os</i>       | chr5:65760990-65763866    | 0.6978 | 0.6514 | -0.0992  | 0.845106 |
| <i>Igfbp7</i>        | chr5:77349239-77408045    | 0.6676 | 0.8456 | 0.3411   | 0.341276 |
| <i>Slc4a4</i>        | chr5:88886817-89239653    | 0.0748 | 0.0934 | 0.3215   | 0.472326 |
| <i>Lrrc8dos</i>      | chr5:105814772-105818988  | 1.2024 | 2.2250 | 0.8879   | 0.062697 |
| <i>Cux2</i>          | chr5:121857962-122050102  | 0.0382 | 0.0375 | -0.0249  | 0.976499 |
| <i>Gm15920</i>       | chr5:130188394-130188796  | 1.3947 | 1.1158 | -0.3219  | 0.351547 |
| <i>Gm10369</i>       | chr5:134676489-134680145  | 0.3686 | 0.6976 | 0.9205   | 0.073521 |
| <i>Kpna7</i>         | chr5:144983518-145084030  | 0.2005 | 0.3095 | 0.6264   | 0.063018 |
| <i>Prrt4</i>         | chr6:29169231-29179584    | 0.1875 | 0.1825 | -0.0394  | 0.927108 |
| <i>Rbpsuh-rs3</i>    | chr6:46529350-46530922    | 0.3493 | 0.2970 | -0.2341  | 0.527358 |
| <i>Gm8566</i>        | chr6:67205618-67206083    | 1.0312 | 1.3072 | 0.3422   | 0.514281 |
| <i>Ptpro</i>         | chr6:137252298-137464629  | 0.0816 | 0.1730 | 1.0844   | 0.050337 |
| <i>Rassf8</i>        | chr6:145746747-145821079  | 0.0803 | 0.1246 | 0.6343   | 0.168152 |
| <i>Gm26891</i>       | chr7:27927723-27931003    | 0.2518 | 0.3404 | 0.4349   | 0.227906 |
| <i>Gm6537</i>        | chr7:28756173-28758965    | 0.4519 | 0.4381 | -0.0446  | 0.944675 |
| <i>Gm15396</i>       | chr7:44579967-44590624    | 0.5137 | 0.8074 | 0.6525   | 0.089672 |
| <i>Grin2d</i>        | chr7:45831882-45870928    | 0.1208 | 0.1741 | 0.5280   | 0.251018 |
| <i>Rps11-ps5</i>     | chr7:96435545-96435999    | 1.4377 | 0.8401 | -0.7751  | 0.181919 |
| <i>D830044I16Rik</i> | chr7:126971719-126976098  | 0.1910 | 0.1781 | -0.1013  | 0.869106 |
| <i>Gm10689</i>       | chr8:25454272-25454704    | 1.3880 | 1.0958 | -0.3409  | 0.472207 |
| <i>Plvap</i>         | chr8:71497753-71511769    | 0.2561 | 0.6133 | 1.2598   | 0.003337 |
| <i>Hp</i>            | chr8:109575129-109579172  | 0.7579 | 0.6198 | -0.2903  | 0.644211 |
| <i>Gm10614</i>       | chr8:120589530-120593801  | 0.1964 | 0.1439 | -0.4487  | 0.594163 |
| <i>Pabpn1l</i>       | chr8:122619470-122622739  | 0.3171 | 0.3313 | 0.0634   | 0.947085 |
| <i>Zglp1</i>         | chr9:21062392-21067093    | 0.7044 | 0.3809 | -0.8869  | 0.235754 |
| <i>S1pr5</i>         | chr9:21242911-21248443    | 0.2911 | 0.1982 | -0.5544  | 0.364586 |
| <i>9530059O14Rik</i> | chr9:122572496-122679596  | 0.0547 | 0.1134 | 1.0511   | 0.147046 |
| <i>Zfp449</i>        | chrX:56346399-56365674    | 0.1844 | 0.3302 | 0.8409   | 0.023158 |
| <i>Rpl3-ps2</i>      | chrX:74170652-74171866    | 0.3840 | 0.3569 | -0.1056  | 0.868628 |
| <i>Gm15367</i>       | chrX:75010589-75011605    | 0.4457 | 0.4546 | 0.0286   | 0.955330 |
| <i>Gm26020</i>       | chrX:105819882-105820065  | 3.2345 | 4.0488 | 0.3239   | 0.370950 |
| <i>Gm6382</i>        | chrX:142210883-142211825  | 0.5184 | 0.5512 | 0.0883   | 0.875614 |
| <i>NA</i>            | chrX:145601810-145602301  | 1.1154 | 0.9171 | -0.2824  | 0.486416 |
| <i>Gm25628</i>       | chr15:64025947-64026052   | 5.8786 | 3.8005 | -0.6293  | 0.145290 |
| <i>4933427E11Rik</i> | chr15:74709160-74710374   | 0.3323 | 0.2657 | -0.3224  | 0.737318 |
| <i>Gm22067</i>       | chr15:81592092-81592199   | 4.5902 | 5.8054 | 0.3388   | 0.610154 |
| <i>Smc1b</i>         | chr15:85064690-85131957   | 0.1192 | 0.1967 | 0.7231   | 0.117137 |
| <i>Gm2178</i>        | chr14:26514553-26514910   | 1.0500 | 1.3407 | 0.3526   | 0.684514 |
| <i>Gm24916</i>       | chr14:31015147-31015226   | 5.3890 | 7.3871 | 0.4550   | 0.443083 |
| <i>Rnase4</i>        | chr14:51091076-51106151   | 0.3362 | 0.5316 | 0.6611   | 0.210762 |
| <i>Trav7n-4</i>      | chr14:53091345-53091875   | 2.1286 | 2.4125 | 0.1806   | 0.756625 |
| <i>Trdv5</i>         | chr14:54148661-54149201   | 1.3316 | 1.0093 | -0.3998  | 0.607450 |
| <i>Mir18</i>         | chr14:115043850-115043946 | 5.6806 | 7.5878 | 0.4176   | 0.326609 |
| <i>T2</i>            | chr17:8372395-8422728     | 0.2398 | 0.3930 | 0.7126   | 0.117572 |
| <i>Prss27</i>        | chr17:24038143-24045954   | 0.4092 | 0.3237 | -0.3382  | 0.445825 |
| <i>BC028777</i>      | chr17:24208860-24221730   | 0.4104 | 0.3482 | -0.2372  | 0.637771 |
| <i>Gm8186</i>        | chr17:26098871-26099257   | 2.0183 | 1.3951 | -0.5328  | 0.272358 |
| <i>Gm26940</i>       | chr17:34024965-34025070   | 3.5341 | 1.6663 | -1.0847  | 0.213583 |
| <i>H2-Pa</i>         | chr17:34084671-34085823   | 0.9476 | 0.5924 | -0.6777  | 0.426455 |
| <i>H2-Q1</i>         | chr17:35320404-35325099   | 0.1741 | 0.1375 | -0.3405  | 0.552186 |
| <i>1700061G19Rik</i> | chr17:56875476-56888904   | 0.2123 | 0.2423 | 0.1904   | 0.612380 |
| <i>Gm5815</i>        | chr17:58593658-58594843   | 0.4477 | 0.5443 | 0.2818   | 0.492844 |
| <i>Gm17228</i>       | chr17:63346919-63347410   | 1.1138 | 2.1443 | 0.9451   | 0.075586 |
| <i>Gm6142</i>        | chr16:4320355-4320680     | 1.9438 | 2.6836 | 0.4653   | 0.384856 |

|                      |                           |        |         |         |          |
|----------------------|---------------------------|--------|---------|---------|----------|
| <i>Rpl39l</i>        | chr16:10170225-10174911   | 0.2901 | 0.0453  | -2.6775 | 0.396829 |
| <i>Gm10343</i>       | chr16:10801368-10801716   | 1.3859 | 1.3830  | -0.0031 | 0.996254 |
| <i>2610318N02Rik</i> | chr16:17113398-17125106   | 0.5980 | 0.7271  | 0.2821  | 0.596838 |
| <i>Popdc2</i>        | chr16:38362208-38378216   | 0.3562 | 0.4429  | 0.3144  | 0.599464 |
| <i>Rpl21-ps5</i>     | chr16:83371250-83371733   | 0.9125 | 0.5252  | -0.7969 | 0.255041 |
| <i>Kcnj15</i>        | chr16:95257557-95300260   | 0.1061 | 0.0768  | -0.4666 | 0.452207 |
| <i>Tigd3</i>         | chr19:5891138-5894107     | 0.3261 | 0.4371  | 0.4229  | 0.321205 |
| <i>Gm16299</i>       | chr19:53819353-53825128   | 0.3394 | 1.6579  | 2.2884  | 0.034502 |
| <i>Snord89</i>       | chr1:39548744-39548854    | 6.3189 | 7.0402  | 0.1559  | 0.742640 |
| <i>Acmsd</i>         | chr1:127729412-127767564  | 0.2275 | 0.2964  | 0.3819  | 0.309206 |
| <i>Map3k19</i>       | chr1:127815270-127840290  | 0.1512 | 0.1582  | 0.0653  | 0.860458 |
| <i>Lct</i>           | chr1:128284755-128328318  | 0.0723 | 0.1062  | 0.5560  | 0.213972 |
| <i>NA</i>            | chr1:153905300-153916910  | 1.5301 | 2.0269  | 0.4056  | 0.401830 |
| <i>Gm26801</i>       | chr1:177429046-177443270  | 0.5481 | 0.4845  | -0.1780 | 0.740171 |
| <i>4930532G15Rik</i> | chr1:185359460-185362865  | 0.8632 | 0.8375  | -0.0437 | 0.945716 |
| <i>9630028B13Rik</i> | chr1:185429356-185441819  | 0.1798 | 0.1342  | -0.4223 | 0.139869 |
| <i>Ankrd29</i>       | chr18:12252361-12305720   | 0.1398 | 0.2226  | 0.6713  | 0.561280 |
| <i>Prob1</i>         | chr18:35652166-35655187   | 0.1502 | 0.1417  | -0.0847 | 0.921988 |
| <i>Eif3j2</i>        | chr18:43475417-43477836   | 0.1904 | 0.1510  | -0.3347 | 0.493581 |
| <i>Stard6</i>        | chr18:70472453-70501066   | 0.3039 | 0.3945  | 0.3765  | 0.142159 |
| <i>Gm26398</i>       | chr2:10504646-10504773    | 6.9947 | 3.8271  | -0.8700 | 0.271705 |
| <i>Gm24806</i>       | chr2:10517336-10517426    | 5.7119 | 3.1749  | -0.8473 | 0.148525 |
| <i>C1q3</i>          | chr2:13003456-13011747    | 0.2156 | 0.2090  | -0.0448 | 0.934462 |
| <i>Rnd3</i>          | chr2:51130437-51149111    | 0.1239 | 0.4238  | 1.7738  | 0.079691 |
| <i>Lrrn4</i>         | chr2:132868304-132880891  | 0.1186 | 0.1808  | 0.6081  | 0.299160 |
| <i>Gm14139</i>       | chr2:150181754-150193279  | 0.3223 | 0.1598  | -1.0125 | 0.252475 |
| <i>Gm14176</i>       | chr2:157901468-157902522  | 0.4687 | 0.7928  | 0.7581  | 0.086840 |
| <i>Gm11464</i>       | chr2:165980725-165992517  | 0.7565 | 0.5251  | -0.5266 | 0.478995 |
| <i>Igsf10</i>        | chr3:59316734-59344256    | 0.0560 | 0.0823  | 0.5546  | 0.137851 |
| <i>Snord73a</i>      | chr3:86138790-86138858    | 9.9668 | 13.4351 | 0.4308  | 0.421067 |
| <i>S100a11</i>       | chr3:93520487-93526287    | 1.1309 | 1.5988  | 0.4994  | 0.347906 |
| <i>Gm15551</i>       | chr3:126667328-126669032  | 0.9693 | 1.0899  | 0.1691  | 0.620110 |
| <i>Depdc1a</i>       | chr3:159495432-159529955  | 0.2355 | 0.1784  | -0.4007 | 0.605552 |
| <i>Anks6</i>         | chr4:47015668-47057306    | 0.0953 | 0.0793  | -0.2637 | 0.755427 |
| <i>Gm12542</i>       | chr4:59889985-59894924    | 0.7613 | 0.8860  | 0.2189  | 0.582623 |
| <i>Gm12846</i>       | chr4:98664365-98666137    | 0.3830 | 0.7735  | 1.0142  | 0.243221 |
| <i>Gm25827</i>       | chr4:108521923-108522030  | 4.3246 | 4.6888  | 0.1167  | 0.851014 |
| <i>Ldha-ps2</i>      | chr4:119334388-119335445  | 0.4851 | 0.3420  | -0.5041 | 0.338817 |
| <i>Gm25604</i>       | chr4:126860979-126861112  | 3.2256 | 3.0051  | -0.1022 | 0.867967 |
| <i>Gm23318</i>       | chr4:148555696-148555804  | 4.5561 | 3.2112  | -0.5047 | 0.438527 |
| <i>Plagl1</i>        | chr10:13090690-13131694   | 0.0528 | 0.2933  | 2.4731  | 0.057457 |
| <i>D10Bwg1379e</i>   | chr10:18588010-18743758   | 0.0725 | 0.1203  | 0.7308  | 0.264982 |
| <i>Gm16546</i>       | chr10:43319359-43319714   | 1.3895 | 1.0428  | -0.4142 | 0.517838 |
| <i>Aifm2</i>         | chr10:61715262-61739260   | 0.1128 | 0.1042  | -0.1144 | 0.892394 |
| <i>Snord98</i>       | chr10:62765575-62765640   | 6.9483 | 6.9456  | -0.0006 | 0.999052 |
| <i>1500009L16Rik</i> | chr10:83722864-83762761   | 0.5841 | 0.4730  | -0.3045 | 0.662975 |
| <i>Kitl</i>          | chr10:100015629-100100413 | 0.1024 | 0.0455  | -1.1711 | 0.430352 |
| <i>Apon</i>          | chr10:128254130-128255901 | 0.2507 | 0.2507  | -0.0001 | 0.999893 |
| <i>Gm12735</i>       | chr11:3193515-3194263     | 1.1000 | 0.9676  | -0.1851 | 0.542770 |
| <i>Gas2l1</i>        | chr11:5054131-5065327     | 0.0883 | 0.1385  | 0.6496  | 0.194947 |
| <i>Gm11977</i>       | chr11:6781677-6783138     | 0.4570 | 0.8847  | 0.9530  | 0.020718 |
| <i>Gm12042</i>       | chr11:21295559-21295860   | 1.9113 | 3.8064  | 0.9939  | 0.074999 |
| <i>Wdpcp</i>         | chr11:21572234-21898989   | 0.0890 | 0.1099  | 0.3052  | 0.566627 |
| <i>Gm12259</i>       | chr11:58865964-58867154   | 1.8673 | 1.8410  | -0.0204 | 0.936446 |
| <i>Gas7</i>          | chr11:67455436-67688990   | 0.0369 | 0.1129  | 1.6119  | 0.107973 |
| <i>Bcl6b</i>         | chr11:70224127-70229798   | 0.1417 | 0.0995  | -0.5100 | 0.353807 |
| <i>Pipox</i>         | chr11:77880614-77894096   | 0.2214 | 0.2218  | 0.0027  | 0.996534 |
| <i>Myo1d</i>         | chr11:80482125-80780025   | 0.0811 | 0.1360  | 0.7460  | 0.023164 |
| <i>Cct6b</i>         | chr11:82719249-82764321   | 0.3633 | 0.3792  | 0.0619  | 0.852447 |
| <i>Heatr9</i>        | chr11:83511735-83522175   | 0.1946 | 0.3957  | 1.0235  | 0.162015 |
| <i>Ccl4</i>          | chr11:83662583-83664683   | 0.5271 | 1.5667  | 1.5716  | 0.151064 |
| <i>Wfdc17</i>        | chr11:83703990-83706268   | 0.4339 | 0.6793  | 0.6468  | 0.518643 |
| <i>Tbkbp1</i>        | chr11:97136170-97151495   | 0.0930 | 0.1491  | 0.6803  | 0.294368 |
| <i>Gm11614</i>       | chr11:97723650-97725711   | 0.6117 | 0.4830  | -0.3407 | 0.559500 |
| <i>Gm11628</i>       | chr11:102492438-102492609 | 2.2226 | 1.8330  | -0.2781 | 0.709003 |
| <i>Plcd3</i>         | chr11:103070303-103101658 | 0.1439 | 0.1211  | -0.2499 | 0.516964 |
| <i>Wnt3</i>          | chr11:103774149-103817957 | 0.1823 | 0.1871  | 0.0369  | 0.959621 |
| <i>Ace</i>           | chr11:105967944-105989964 | 0.0913 | 0.0890  | -0.0373 | 0.964693 |
| <i>Gm25556</i>       | chr11:106186443-106186587 | 4.1299 | 4.3918  | 0.0887  | 0.827380 |
| <i>NA</i>            | chr11:106725257-106725450 | 2.8671 | 4.5091  | 0.6532  | 0.226212 |
| <i>Cd300ld</i>       | chr11:114982273-114989922 | 0.2265 | 0.2476  | 0.1285  | 0.766247 |

|                      |                           |        |        |         |          |
|----------------------|---------------------------|--------|--------|---------|----------|
| <i>BC018473</i>      | chr11:116752166-116759373 | 0.0695 | 0.1555 | 1.1625  | 0.240446 |
| <i>Gm16045</i>       | chr11:117257648-117263437 | 0.1467 | 0.0835 | -0.8137 | 0.374915 |
| <i>Fam84a</i>        | chr12:14147598-14152038   | 0.1809 | 0.5710 | 1.6584  | 0.178571 |
| <i>Insm2</i>         | chr12:55598916-55602018   | 0.2040 | 0.1971 | -0.0497 | 0.909184 |
| <i>Ak7</i>           | chr12:105705981-105782447 | 0.1374 | 0.1433 | 0.0607  | 0.926459 |
| <i>Tnfaip2</i>       | chr12:111442468-111455018 | 0.0555 | 0.1032 | 0.8939  | 0.217984 |
| <i>Itga1</i>         | chr13:114958078-115101964 | 0.0790 | 0.1155 | 0.5481  | 0.606355 |
| <i>Steap4</i>        | chr5:7960471-7982213      | 0.0675 | 0.0001 | -9.3977 | 0.309082 |
| <i>Magi2</i>         | chr5:20702276-20706049    | 0.6137 | 0.9295 | 0.5989  | 0.253888 |
| <i>Gm22333</i>       | chr5:24438485-24438586    | 5.9757 | 4.2433 | -0.4939 | 0.572046 |
| <i>Hgfac</i>         | chr5:35041552-35048436    | 0.2196 | 0.4133 | 0.9124  | 0.200624 |
| <i>Gm25551</i>       | chr5:37092257-37092360    | 6.2345 | 6.0418 | -0.0453 | 0.947583 |
| <i>Snora26</i>       | chr5:74093529-74093650    | 4.7990 | 6.6849 | 0.4782  | 0.195295 |
| <i>2310040G07Rik</i> | chr5:76928367-76947758    | 0.7482 | 0.9425 | 0.3331  | 0.489911 |
| <i>Gm23031</i>       | chr5:92302173-92302292    | 4.1088 | 2.5226 | -0.7038 | 0.472121 |
| <i>Cxcl10</i>        | chr5:92346637-92348889    | 0.1655 | 1.1070 | 2.7422  | 0.010675 |
| <i>Gm24191</i>       | chr5:106669998-106670121  | 4.5226 | 5.2785 | 0.2230  | 0.515782 |
| <i>Miat</i>          | chr5:112213227-112229395  | 0.0438 | 0.1479 | 1.7546  | 0.219032 |
| <i>Cabp1</i>         | chr5:115168688-115194381  | 0.2261 | 0.2146 | -0.0749 | 0.886567 |
| <i>Sds</i>           | chr5:120476530-120483932  | 0.3157 | 0.3164 | 0.0029  | 0.995415 |
| <i>Gm23171</i>       | chr5:124257762-124258026  | 1.7237 | 1.6017 | -0.1059 | 0.829714 |
| <i>Mir702</i>        | chr5:136991432-136991541  | 4.7820 | 5.0889 | 0.0897  | 0.795916 |
| <i>Zan</i>           | chr5:137378636-137477064  | 0.0268 | 0.0600 | 1.1634  | 0.162197 |
| <i>Gm24311</i>       | chr5:144013997-144014101  | 2.3802 | 3.9456 | 0.7292  | 0.433960 |
| <i>Rasl11a</i>       | chr5:146845070-146847726  | 0.2668 | 0.9700 | 1.8622  | 0.140126 |
| <i>Gm13899</i>       | chr6:17711686-17712941    | 0.4088 | 0.4293 | 0.0705  | 0.910284 |
| <i>Dgki</i>          | chr6:36846021-37300184    | 0.0802 | 0.2296 | 1.5178  | 0.206911 |
| <i>Gm7452</i>        | chr6:36956643-36960417    | 0.1231 | 0.1080 | -0.1894 | 0.689639 |
| <i>Prss2</i>         | chr6:41521786-41525079    | 0.7727 | 0.9743 | 0.3344  | 0.508412 |
| <i>Gm15550</i>       | chr6:43373804-43374878    | 0.3619 | 0.3456 | -0.0668 | 0.927888 |
| <i>9530036M11Rik</i> | chr6:54146886-54150937    | 0.3776 | 0.5098 | 0.4332  | 0.398799 |
| <i>Tnip3</i>         | chr6:65590397-65634040    | 0.1107 | 0.2907 | 1.3926  | 0.236192 |
| <i>Ndnf</i>          | chr6:65671589-65706930    | 0.1250 | 0.2229 | 0.8340  | 0.127678 |
| <i>Prdm5</i>         | chr6:65778987-65936373    | 0.1568 | 0.1512 | -0.0525 | 0.939115 |
| <i>Gm15401</i>       | chr6:72629287-72637717    | 0.2632 | 0.1908 | -0.4638 | 0.330904 |
| <i>0610040F04Rik</i> | chr6:108577038-108660934  | 0.2187 | 0.3153 | 0.5277  | 0.497348 |
| <i>Gm23851</i>       | chr6:124964284-124964387  | 5.0927 | 6.0088 | 0.2386  | 0.583888 |
| <i>Gm26951</i>       | chr6:128313336-128313997  | 1.0397 | 1.0308 | -0.0125 | 0.968905 |
| <i>Rpl18-ps2</i>     | chr6:128313337-128313960  | 1.0147 | 1.0060 | -0.0125 | 0.968905 |
| <i>Clec7a</i>        | chr6:129461590-129472777  | 0.3560 | 0.5564 | 0.6442  | 0.309222 |
| <i>Apold1</i>        | chr6:134982000-134986836  | 0.1463 | 0.1457 | -0.0058 | 0.994575 |
| <i>Bcam</i>          | chr7:19756130-19771016    | 0.1303 | 0.2428 | 0.8978  | 0.311385 |
| <i>Cox7a1</i>        | chr7:30184170-30186028    | 1.5952 | 2.5032 | 0.6500  | 0.254513 |
| <i>Slc7a10</i>       | chr7:35186384-35204898    | 0.2703 | 0.4949 | 0.8725  | 0.403294 |
| <i>Rgs9bp</i>        | chr7:35578997-35585582    | 0.0583 | 0.0391 | -0.5774 | 0.382692 |
| <i>Plekhf1</i>       | chr7:38220653-38227994    | 0.2161 | 0.2077 | -0.0578 | 0.937274 |
| <i>Plekh4</i>        | chr7:45526329-45554229    | 0.1077 | 0.1422 | 0.4009  | 0.525729 |
| <i>A830073O21Rik</i> | chr7:73738892-73740917    | 0.2530 | 0.2241 | -0.1747 | 0.680085 |
| <i>Gm24224</i>       | chr7:79352487-79352745    | 2.7175 | 1.7373 | -0.6455 | 0.301479 |
| <i>NA</i>            | chr7:104355397-104358646  | 0.2072 | 0.3879 | 0.9044  | 0.042401 |
| <i>Trim30c</i>       | chr7:104382064-104390586  | 0.2817 | 0.3230 | 0.1974  | 0.686874 |
| <i>Tub</i>           | chr7:109010824-109034460  | 0.0657 | 0.1131 | 0.7841  | 0.322638 |
| <i>Tmem159</i>       | chr7:120102375-120120992  | 0.2371 | 0.2404 | 0.0202  | 0.974697 |
| <i>Gm16201</i>       | chr7:139950395-139978977  | 0.2141 | 0.2848 | 0.4114  | 0.425075 |
| <i>Gm16589</i>       | chr8:4087542-4089900      | 0.2498 | 0.2927 | 0.2289  | 0.663217 |
| <i>Nek5</i>          | chr8:22073615-22125053    | 0.1240 | 0.1874 | 0.5953  | 0.419164 |
| <i>Cilp2</i>         | chr8:69880368-69887687    | 0.0907 | 0.1506 | 0.7313  | 0.444978 |
| <i>Gm16183</i>       | chr8:84611201-84617184    | 0.4522 | 0.6755 | 0.5790  | 0.389024 |
| <i>Nol3</i>          | chr8:105276446-105281939  | 0.2138 | 0.2260 | 0.0798  | 0.881586 |
| <i>4933405L10Rik</i> | chr8:105708290-105710244  | 0.3430 | 0.3074 | -0.1580 | 0.727233 |
| <i>Gm24103</i>       | chr8:111041947-111042024  | 5.2897 | 4.7015 | -0.1701 | 0.858915 |
| <i>Mkl1</i>          | chr8:111311796-111338177  | 0.2143 | 0.5703 | 1.4121  | 0.027276 |
| <i>Epor</i>          | chr9:21958898-21963576    | 0.1911 | 0.4325 | 1.1785  | 0.059499 |
| <i>Igsf9b</i>        | chr9:27299227-27334763    | 0.0737 | 0.2032 | 1.4628  | 0.145485 |
| <i>Kirrel3os</i>     | chr9:34918232-34929509    | 0.1180 | 0.2738 | 1.2139  | 0.288231 |
| <i>Gm25630</i>       | chr9:35474884-35475046    | 2.9271 | 4.4291 | 0.5975  | 0.207869 |
| <i>Nxpe4</i>         | chr9:48362040-48400025    | 0.1276 | 0.2002 | 0.6500  | 0.230706 |
| <i>Plet1</i>         | chr9:50494524-50505639    | 0.2543 | 0.2887 | 0.1828  | 0.747055 |
| <i>Calm4</i>         | chr9:62858103-62875918    | 0.8979 | 1.8259 | 1.0240  | 0.060760 |
| <i>Gm16353</i>       | chr9:75132958-75134181    | 0.4129 | 0.6033 | 0.5469  | 0.142364 |
| <i>Cd109</i>         | chr9:78615545-78716253    | 0.0956 | 0.3891 | 2.0256  | 0.144357 |



|               |                           |        |        |         |          |
|---------------|---------------------------|--------|--------|---------|----------|
| NA            | chr9:88723287-88731850    | 1.2363 | 1.1654 | -0.0852 | 0.921224 |
| Nek11         | chr9:105162466-105395524  | 0.1678 | 0.1643 | -0.0311 | 0.932416 |
| Col6a4        | chr9:105989453-106096783  | 0.0677 | 0.0495 | -0.4516 | 0.239329 |
| Mirlet7g      | chr9:106178839-106178927  | 3.9583 | 3.7625 | -0.0732 | 0.928506 |
| Gm17399       | chr9:118150230-118170376  | 0.4528 | 0.4198 | -0.1091 | 0.766861 |
| Slc22a13b-ps  | chr9:119220487-119231692  | 0.3111 | 0.3912 | 0.3305  | 0.527281 |
| Gm14450       | chrX:5984771-5985011      | 2.1915 | 2.0896 | -0.0687 | 0.891829 |
| Slc25a43      | chrX:36743658-36777202    | 0.2187 | 0.2113 | -0.0499 | 0.940553 |
| Rab33a        | chrX:48519284-48530232    | 0.4675 | 0.3964 | -0.2380 | 0.732194 |
| Xlr           | chrX:53777117-53797706    | 0.1646 | 0.0069 | -4.5732 | 0.202288 |
| Mir3112       | chrX:134075315-134075397  | 5.0204 | 7.0537 | 0.4906  | 0.451367 |
| Rai14         | chr15:10568978-10714631   | 0.0493 | 0.0825 | 0.7420  | 0.528339 |
| Ly6i          | chr15:74979811-74983430   | 0.5577 | 0.4994 | -0.1594 | 0.768689 |
| C1qtnf6       | chr15:78523345-78529625   | 0.2540 | 0.3170 | 0.3194  | 0.639737 |
| Cacna1i       | chr15:80287237-80398279   | 0.0396 | 0.0669 | 0.7588  | 0.205356 |
| 4930578M01Rik | chr15:98985964-98989281   | 0.4604 | 0.4548 | -0.0178 | 0.979306 |
| Soat2         | chr15:102150525-102163474 | 0.3143 | 0.3953 | 0.3310  | 0.441241 |
| Il17rd        | chr14:27039000-27107286   | 0.0547 | 0.0346 | -0.6633 | 0.509126 |
| Gm15512       | chr14:33365950-33370143   | 0.2268 | 0.2280 | 0.0080  | 0.988086 |
| Nynrin        | chr14:55854035-55874735   | 0.0769 | 0.1040 | 0.4357  | 0.427083 |
| 1700001G11Rik | chr14:66295333-66297129   | 0.4586 | 0.4690 | 0.0322  | 0.962522 |
| Loxl2         | chr14:69609170-69695833   | 0.0784 | 0.1491 | 0.9275  | 0.029579 |
| Mir687        | chr14:73206762-73206851   | 6.1860 | 4.7991 | -0.3662 | 0.253126 |
| Serp2         | chr14:76532813-76556687   | 0.7989 | 1.0721 | 0.4244  | 0.519826 |
| Mir20a        | chr14:115044156-115044263 | 5.8361 | 7.6539 | 0.3912  | 0.108709 |
| B930095G15Rik | chr14:121248705-121251497 | 0.1579 | 0.4154 | 1.3959  | 0.236636 |
| 3300005D01Rik | chr17:5798656-5803240     | 0.2933 | 0.3572 | 0.2846  | 0.742707 |
| Slc22a2       | chr17:12584188-12628465   | 0.1328 | 0.1662 | 0.3237  | 0.727653 |
| Vmn1r-ps145   | chr17:20969060-20969484   | 1.2282 | 1.7548 | 0.5147  | 0.131353 |
| Tmprss3       | chr17:31179271-31198975   | 0.1396 | 0.1553 | 0.1533  | 0.810100 |
| Gm6034        | chr17:36042960-36058645   | 0.3019 | 0.5526 | 0.8720  | 0.030388 |
| Runx2os1      | chr17:44735844-44737612   | 0.8084 | 0.6390 | -0.3392 | 0.540208 |
| Emr4          | chr17:55749983-55853662   | 0.1253 | 0.1116 | -0.1673 | 0.766623 |
| Gm9320        | chr17:70853766-70875965   | 1.3380 | 2.2391 | 0.7428  | 0.131440 |
| Emilin2       | chr17:71252175-71310965   | 0.1736 | 0.1589 | -0.1283 | 0.815914 |
| n-R5s29       | chr17:78858933-78859052   | 3.6862 | 5.7841 | 0.6500  | 0.183404 |
| AU021092      | chr16:5211827-5222299     | 0.4082 | 0.3362 | -0.2800 | 0.577870 |
| Prm1          | chr16:10796325-10796886   | 1.2719 | 0.9996 | -0.3476 | 0.441510 |
| Fgd4          | chr16:16416916-16600549   | 0.0184 | 0.0194 | 0.0767  | 0.934203 |
| Gm7873        | chr16:18218169-18219313   | 0.6290 | 0.4619 | -0.4456 | 0.523873 |
| Gm6493        | chr16:23014207-23017038   | 0.2363 | 0.2917 | 0.3039  | 0.642719 |
| Slc51a        | chr16:32475521-32487879   | 0.2729 | 0.3404 | 0.3186  | 0.715053 |
| Ccdc80        | chr16:45093401-45127924   | 0.0798 | 0.2290 | 1.5202  | 0.309904 |
| Tagln3        | chr16:45711229-45724608   | 0.5012 | 0.2660 | -0.9141 | 0.331931 |
| Retnlg        | chr16:48872607-48874498   | 0.6685 | 0.4667 | -0.5182 | 0.539240 |
| Arl6          | chr16:59612948-59639391   | 0.2511 | 0.2863 | 0.1893  | 0.440166 |
| Tmem132a      | chr19:10857821-10869940   | 0.1453 | 0.2091 | 0.5255  | 0.225805 |
| Gda           | chr19:21391306-21473445   | 0.0720 | 0.1127 | 0.6451  | 0.347222 |
| Cpeb3         | chr19:37021290-37208601   | 0.0721 | 0.1252 | 0.7948  | 0.238929 |
| Gm24724       | chr19:53159756-53159863   | 3.3448 | 3.3190 | -0.0112 | 0.989822 |
| Gm5828        | chr1:16768269-16770138    | 0.2983 | 0.2619 | -0.1875 | 0.443121 |
| 1500015O10Rik | chr1:43730601-43742578    | 0.6592 | 0.6044 | -0.1252 | 0.869879 |
| Gm16107       | chr1:52873136-52873998    | 0.5853 | 0.5671 | -0.0455 | 0.923162 |
| 4930558J18Rik | chr1:57359221-57377504    | 0.2350 | 0.2259 | -0.0575 | 0.914600 |
| Aox2          | chr1:58278325-58379264    | 0.0977 | 0.0482 | -1.0177 | 0.111975 |
| Gm23966       | chr1:58466514-58466621    | 3.6643 | 2.8031 | -0.3865 | 0.585279 |
| Fn1           | chr1:71585522-71653171    | 0.0690 | 0.0581 | -0.2477 | 0.764148 |
| Cxcr2         | chr1:74153988-74161238    | 0.1772 | 0.2024 | 0.1920  | 0.717302 |
| Gm22549       | chr1:87341454-87341561    | 4.2695 | 2.5997 | -0.7157 | 0.443238 |
| Ugt1a7c       | chr1:88095061-88220002    | 0.1571 | 0.0913 | -0.7830 | 0.176317 |
| BC026585      | chr1:157458579-157489060  | 0.2667 | 0.2614 | -0.0292 | 0.948451 |
| Tnfrsf18      | chr1:161494654-161505290  | 0.1552 | 0.2712 | 0.8052  | 0.296401 |
| Osbp1a        | chr18:12755313-12941841   | 0.0822 | 0.0918 | 0.1605  | 0.708898 |
| Cdc25c        | chr18:34732996-34751533   | 0.3786 | 0.5975 | 0.6582  | 0.239219 |
| E230025N22Rik | chr18:36684922-36695925   | 0.2898 | 0.3893 | 0.4259  | 0.474494 |
| NA            | chr18:50046739-50047152   | 1.7085 | 1.3245 | -0.3674 | 0.669086 |
| Pstpip2       | chr18:77794544-77882007   | 0.2494 | 0.4044 | 0.6969  | 0.354690 |
| Gm25451       | chr2:10480364-10480485    | 3.7558 | 2.0027 | -0.9072 | 0.155836 |
| Gm22051       | chr2:10506554-10506681    | 4.4442 | 4.5315 | 0.0281  | 0.939610 |
| Gm24342       | chr2:10509583-10509687    | 4.6699 | 3.3675 | -0.4717 | 0.513268 |
| Cacna1b       | chr2:24603886-24763152    | 0.0356 | 0.0221 | -0.6836 | 0.451159 |

|                   |                           |        |         |         |          |
|-------------------|---------------------------|--------|---------|---------|----------|
| <i>Lcn2</i>       | chr2:32384632-32387797    | 0.1810 | 0.1978  | 0.1283  | 0.904576 |
| <i>Garnl3</i>     | chr2:32986365-33131654    | 0.0374 | 0.0241  | -0.6316 | 0.301280 |
| <i>Gm13407</i>    | chr2:34412987-34413347    | 1.6772 | 3.0774  | 0.8756  | 0.144576 |
| <i>Gm13408</i>    | chr2:34564998-34565796    | 0.6334 | 0.8644  | 0.4485  | 0.317369 |
| <i>Ptgs1</i>      | chr2:36230425-36252272    | 0.0716 | 0.0451  | -0.6679 | 0.583716 |
| <i>Gm13511</i>    | chr2:39216931-39217294    | 1.4519 | 1.6117  | 0.1506  | 0.740702 |
| <i>Gcg</i>        | chr2:62474529-62483650    | 0.1780 | 0.1665  | -0.0960 | 0.943025 |
| <i>Chn1</i>       | chr2:73610659-73775346    | 0.0778 | 0.3209  | 2.0453  | 0.087893 |
| <i>Gm4735</i>     | chr2:80837126-80838762    | 0.2685 | 0.1956  | -0.4568 | 0.521991 |
| <i>Pak6</i>       | chr2:118663302-118698020  | 0.0776 | 0.1251  | 0.6889  | 0.458880 |
| <i>Sptbn5</i>     | chr2:120046156-120085772  | 0.0407 | 0.0621  | 0.6106  | 0.377993 |
| <i>Map1a</i>      | chr2:121289599-121310832  | 0.0487 | 0.0594  | 0.2843  | 0.232014 |
| <i>Frmf5</i>      | chr2:121545528-121807087  | 0.1015 | 0.1413  | 0.4770  | 0.481301 |
| <i>Sema6d</i>     | chr2:124089968-124667770  | 0.0317 | 0.0471  | 0.5714  | 0.556319 |
| <i>Gm14005</i>    | chr2:128195992-128429349  | 0.3443 | 0.6102  | 0.8256  | 0.197765 |
| <i>Il1a</i>       | chr2:129299609-129309972  | 0.2904 | 0.3980  | 0.4548  | 0.393084 |
| <i>Spca2-ps</i>   | chr2:129378270-129379396  | 0.7855 | 0.7163  | -0.1331 | 0.691208 |
| <i>Mir103-2</i>   | chr2:131288051-131288137  | 5.6692 | 2.2090  | -1.3598 | 0.104644 |
| <i>Gm11454</i>    | chr2:163122605-163143959  | 0.4429 | 0.5614  | 0.3420  | 0.593624 |
| <i>Mmp9</i>       | chr2:164940779-164955850  | 0.2937 | 0.3028  | 0.0443  | 0.964260 |
| <i>mt-Tp</i>      | chrM:15355-15422          | 6.8126 | 12.6414 | 0.8919  | 0.019014 |
| <i>Gm23686</i>    | chr3:18177461-18177625    | 2.9934 | 2.1674  | -0.4658 | 0.463789 |
| <i>NA</i>         | chr3:32365774-32367436    | 0.3876 | 0.3658  | -0.0835 | 0.722621 |
| <i>Ccdc144b</i>   | chr3:36007246-36053547    | 0.0901 | 0.0938  | 0.0574  | 0.869628 |
| <i>Ccdc169</i>    | chr3:55137338-55172935    | 0.1372 | 0.1378  | 0.0071  | 0.991368 |
| <i>Gm20627</i>    | chr3:96254618-96256277    | 0.4774 | 0.2033  | -1.2315 | 0.247030 |
| <i>Atg4a-ps</i>   | chr3:103644002-103646069  | 0.2373 | 0.2591  | 0.1264  | 0.843166 |
| <i>Npnt</i>       | chr3:132881744-132950291  | 0.1142 | 0.1700  | 0.5737  | 0.598758 |
| <i>Gm16325</i>    | chr3:146641931-146651715  | 0.1677 | 0.1378  | -0.2832 | 0.582831 |
| <i>St6galnac5</i> | chr3:152817080-152982246  | 0.0887 | 0.0843  | -0.0729 | 0.906236 |
| <i>Gm16231</i>    | chr3:152943312-152943944  | 1.6205 | 2.2404  | 0.4673  | 0.423574 |
| <i>Atp6v0d2</i>   | chr4:19876840-19922605    | 0.1730 | 0.2560  | 0.5650  | 0.516931 |
| <i>Gm11889</i>    | chr4:23517361-23518440    | 0.4987 | 0.5924  | 0.2483  | 0.261901 |
| <i>Fam219aos</i>  | chr4:41517436-41518929    | 0.7198 | 1.0947  | 0.6048  | 0.235089 |
| <i>Unc13b</i>     | chr4:43058952-43264871    | 0.0272 | 0.0527  | 0.9555  | 0.280711 |
| <i>Gm12430</i>    | chr4:47453631-47454953    | 0.3979 | 0.5094  | 0.3563  | 0.503233 |
| <i>Orm1</i>       | chr4:63344559-63348163    | 0.6100 | 1.1422  | 0.9049  | 0.297439 |
| <i>Gm12869</i>    | chr4:107349038-107351353  | 1.4705 | 2.3379  | 0.6689  | 0.050582 |
| <i>NA</i>         | chr4:111807357-111808426  | 0.3263 | 0.1497  | -1.1241 | 0.447079 |
| <i>Skint3</i>     | chr4:112232244-112300468  | 0.1279 | 0.3698  | 1.5321  | 0.102043 |
| <i>Hpd1</i>       | chr4:116819906-116821508  | 0.2493 | 0.3602  | 0.5309  | 0.293614 |
| <i>Ermap</i>      | chr4:119175456-119190011  | 0.0918 | 0.1075  | 0.2288  | 0.743053 |
| <i>Rpl28-ps3</i>  | chr4:126069866-126070280  | 1.1768 | 0.4681  | -1.3301 | 0.016145 |
| <i>Gm12944</i>    | chr4:127056261-127056724  | 0.9857 | 1.3036  | 0.4032  | 0.312180 |
| <i>Gm24636</i>    | chr4:133171426-133171714  | 1.6861 | 3.3758  | 1.0015  | 0.097423 |
| <i>Gm12990</i>    | chr4:135403188-135403656  | 1.2226 | 1.6908  | 0.4678  | 0.175216 |
| <i>Ephb2</i>      | chr4:136647538-136835988  | 0.0421 | 0.0388  | -0.1196 | 0.818825 |
| <i>Tmem51</i>     | chr4:142030991-142084304  | 0.1864 | 0.3849  | 1.0459  | 0.117177 |
| <i>Gm13166</i>    | chr4:146251828-146278434  | 0.3431 | 0.7560  | 1.1398  | 0.030623 |
| <i>Rsph4a</i>     | chr10:33905110-33916021   | 0.1327 | 0.2170  | 0.7100  | 0.055129 |
| <i>Gm17148</i>    | chr10:59708789-59709038   | 1.1897 | 1.5357  | 0.3684  | 0.556081 |
| <i>Hcn2</i>       | chr10:79716633-79736108   | 0.1303 | 0.1990  | 0.6105  | 0.290681 |
| <i>Gipc3</i>      | chr10:81337761-81343266   | 0.5269 | 0.5926  | 0.1694  | 0.474183 |
| <i>Gm6283</i>     | chr10:127313148-127314148 | 0.5051 | 0.5149  | 0.0278  | 0.940370 |
| <i>Gm25361</i>    | chr10:128402757-128402833 | 3.8394 | 5.7959  | 0.5942  | 0.296606 |
| <i>Gm26393</i>    | chr11:3656662-3656791     | 3.5348 | 5.2037  | 0.5579  | 0.247539 |
| <i>Gm11975</i>    | chr11:6559022-6559503     | 1.1546 | 1.4478  | 0.3265  | 0.376811 |
| <i>NA</i>         | chr11:20244705-20244913   | 1.3990 | 2.1218  | 0.6009  | 0.329725 |
| <i>Mup-ps22</i>   | chr11:55123694-55123937   | 1.1730 | 1.4903  | 0.3455  | 0.671360 |
| <i>Gm12247</i>    | chr11:58097103-58097773   | 0.5132 | 0.6027  | 0.2320  | 0.697706 |
| <i>Obscn</i>      | chr11:58994255-59136402   | 0.0122 | 0.0333  | 1.4539  | 0.004181 |
| <i>Dnah2</i>      | chr11:69420808-69549110   | 0.0141 | 0.0324  | 1.2018  | 0.143356 |
| <i>Nlrp1c-ps</i>  | chr11:71242429-71285232   | 0.0197 | 0.2771  | 3.8162  | 0.008469 |
| <i>Gm22075</i>    | chr11:72800286-72800478   | 2.5523 | 4.0049  | 0.6500  | 0.084134 |
| <i>Gm22772</i>    | chr11:77052946-77053067   | 1.8597 | 4.9378  | 1.4088  | 0.054567 |
| <i>Gm22311</i>    | chr11:83764637-83764747   | 3.2862 | 3.6890  | 0.1668  | 0.727498 |
| <i>Gdgd1</i>      | chr11:87033866-87074062   | 0.1781 | 0.2875  | 0.6913  | 0.025026 |
| <i>Scpep1os</i>   | chr11:88905927-88936061   | 0.2717 | 0.4217  | 0.6341  | 0.534532 |
| <i>Gm11527</i>    | chr11:95858161-95859174   | 0.6179 | 0.9496  | 0.6199  | 0.221257 |
| <i>Rapgef1</i>    | chr11:98836784-98853697   | 0.0417 | 0.1111  | 1.4133  | 0.037143 |
| <i>Gm23849</i>    | chr11:101627365-101627556 | 1.5689 | 1.5902  | 0.0195  | 0.985686 |

|                      |                           |        |        |         |          |
|----------------------|---------------------------|--------|--------|---------|----------|
| <i>Abca9</i>         | chr11:110100748-110168196 | 0.0320 | 0.0438 | 0.4523  | 0.606410 |
| <i>Snord1b</i>       | chr11:116674147-116674222 | 3.2385 | 6.3089 | 0.9621  | 0.098359 |
| <i>Gm17586</i>       | chr11:120633767-120635125 | 0.1571 | 0.7381 | 2.2323  | 0.000621 |
| <i>Gm12586</i>       | chr11:121856772-121861227 | 0.2668 | 0.1781 | -0.5828 | 0.577741 |
| <i>Gm1818</i>        | chr12:48554181-48559971   | 0.1668 | 0.1529 | -0.1260 | 0.842048 |
| <i>Gm23394</i>       | chr12:55821062-55821153   | 3.6671 | 8.0595 | 1.1360  | 0.054131 |
| <i>Rtn1</i>          | chr12:72211751-72409054   | 0.0674 | 0.2150 | 1.6740  | 0.016493 |
| <i>Scarna3b</i>      | chr12:80391612-80391751   | 3.1152 | 6.7810 | 1.1222  | 0.035679 |
| <i>Smoc1</i>         | chr12:81026807-81186414   | 0.0052 | 0.1436 | 4.7943  | 0.181564 |
| <i>Gm10433</i>       | chr12:100187967-100193540 | 0.1224 | 0.2649 | 1.1139  | 0.223639 |
| <i>AK157302</i>      | chr13:21495222-21497146   | 0.2508 | 0.3243 | 0.3708  | 0.244376 |
| <i>AK157302</i>      | chr13:21495305-21495695   | 1.2369 | 1.5995 | 0.3709  | 0.244376 |
| <i>Rnf144b</i>       | chr13:47122719-47247991   | 0.1079 | 0.1803 | 0.7409  | 0.010250 |
| <i>Mirlet7a-1</i>    | chr13:48538178-48538272   | 2.7981 | 5.3197 | 0.9269  | 0.106506 |
| <i>Tspan17</i>       | chr13:54789376-54796776   | 0.1779 | 0.2317 | 0.3812  | 0.560703 |
| <i>Gm16133</i>       | chr13:63333136-63339959   | 0.2574 | 0.3654 | 0.5056  | 0.618803 |
| <i>Gm22887</i>       | chr5:22534736-22534843    | 4.4320 | 6.3025 | 0.5080  | 0.069279 |
| <i>Gm15982</i>       | chr5:74356565-74358415    | 0.8558 | 1.7992 | 1.0721  | 0.060508 |
| <i>Anxa3</i>         | chr5:96793384-96845968    | 0.0852 | 0.2861 | 1.7476  | 0.070137 |
| <i>Gm5560</i>        | chr5:97264827-97265719    | 0.3768 | 0.3694 | -0.0285 | 0.966270 |
| <i>Wdfy3</i>         | chr5:101832955-102069921  | 0.0180 | 0.0458 | 1.3477  | 0.111253 |
| <i>Sh2b2</i>         | chr5:136218148-136244903  | 0.0845 | 0.1607 | 0.9267  | 0.165984 |
| <i>Nxpe5</i>         | chr5:138225897-138253363  | 0.0738 | 0.1129 | 0.6122  | 0.374010 |
| <i>2900089D17Rik</i> | chr5:144241689-144256186  | 0.0665 | 0.2409 | 1.8581  | 0.003171 |
| <i>1810059H22Rik</i> | chr5:148953747-148970122  | 0.1056 | 0.2132 | 1.0136  | 0.147828 |
| <i>Gm15573</i>       | chr6:53045883-53046423    | 0.6828 | 1.6592 | 1.2809  | 0.072468 |
| <i>M1ap</i>          | chr6:82946901-83030183    | 0.0747 | 0.3127 | 2.0665  | 0.011839 |
| <i>Gm25178</i>       | chr6:88405976-88406301    | 0.8687 | 2.0022 | 1.2046  | 0.077533 |
| <i>Gm22591</i>       | chr6:113060697-113060803  | 4.9536 | 5.4102 | 0.1272  | 0.683389 |
| <i>Slc6a12</i>       | chr6:121343075-121365775  | 0.0117 | 0.0853 | 2.8607  | 0.160388 |
| <i>Clec4a4</i>       | chr6:122990366-123024105  | 0.3514 | 0.8614 | 1.2936  | 0.078126 |
| <i>Ltbr</i>          | chr6:125306570-125313885  | 0.1172 | 0.2233 | 0.9305  | 0.087617 |
| <i>Clec12a</i>       | chr6:129342690-129365303  | 0.0913 | 0.0782 | -0.2239 | 0.721391 |
| <i>Klri2</i>         | chr6:129729040-129740484  | 0.0711 | 0.1555 | 1.1282  | 0.035534 |
| <i>Eps8</i>          | chr6:137477244-137654876  | 0.0670 | 0.2246 | 1.7444  | 0.003448 |
| <i>Gm15925</i>       | chr7:3795903-3799631      | 0.1231 | 0.2128 | 0.7894  | 0.274994 |
| <i>Slc8a2</i>        | chr7:16130299-16160509    | 0.0329 | 0.0742 | 1.1735  | 0.368840 |
| <i>Mir1964</i>       | chr7:29773293-29773376    | 4.6205 | 7.3032 | 0.6605  | 0.045987 |
| <i>Siglece</i>       | chr7:43651069-43660161    | 0.1206 | 0.2914 | 1.2722  | 0.174986 |
| <i>Spib</i>          | chr7:44525994-44532071    | 0.1446 | 0.4073 | 1.4938  | 0.057323 |
| <i>Anpep</i>         | chr7:79821802-79848210    | 0.0471 | 0.1683 | 1.8371  | 0.093795 |
| <i>6330403N20Rik</i> | chr7:80297727-80299616    | 0.3194 | 0.4958 | 0.6343  | 0.213582 |
| <i>Rab30</i>         | chr7:92741602-92837117    | 0.1257 | 0.2456 | 0.9659  | 0.170375 |
| <i>Ucp3</i>          | chr7:100472989-100486432  | 0.0964 | 0.1489 | 0.6271  | 0.199833 |
| <i>4933440M02Rik</i> | chr7:125329642-125349772  | 0.0702 | 0.1101 | 0.6498  | 0.427083 |
| <i>Il27</i>          | chr7:126589009-126594941  | 0.2530 | 0.4100 | 0.6965  | 0.336034 |
| <i>Syce1</i>         | chr7:140777228-140787854  | 0.0129 | 0.8875 | 6.1037  | 0.344518 |
| <i>Gm26102</i>       | chr8:4274852-4275136      | 1.7139 | 2.0458 | 0.2554  | 0.131254 |
| <i>Tlr3</i>          | chr8:45395664-45410608    | 0.0571 | 0.1250 | 1.1308  | 0.112548 |
| <i>Gm15354</i>       | chr8:66384622-66387535    | 0.0307 | 0.2149 | 2.8063  | 0.020777 |
| <i>Nanos3</i>        | chr8:84173732-84176552    | 0.3381 | 0.5611 | 0.7308  | 0.262872 |
| <i>Rtbdn</i>         | chr8:84946990-84956603    | 0.1093 | 0.1867 | 0.7719  | 0.162532 |
| <i>Lpcat2</i>        | chr8:92855349-92919279    | 0.1144 | 0.2211 | 0.9505  | 0.071524 |
| <i>Cdh5</i>          | chr8:104101624-104144502  | 0.1021 | 0.1291 | 0.3389  | 0.519907 |
| <i>Tmem231</i>       | chr8:111912017-111933791  | 0.1580 | 0.2489 | 0.6554  | 0.284779 |
| <i>Cdh13</i>         | chr8:118283732-119324921  | 0.0439 | 0.0456 | 0.0560  | 0.874646 |
| <i>Snai3</i>         | chr8:122454205-122460692  | 0.0327 | 0.7861 | 4.5873  | 0.000247 |
| <i>Fut4</i>          | chr9:14748458-14752122    | 0.0864 | 0.1821 | 1.0754  | 0.144081 |
| <i>Gm25558</i>       | chr9:50887949-50888055    | 2.4592 | 4.1366 | 0.7503  | 0.156163 |
| <i>Gm25313</i>       | chr9:65196571-65196687    | 4.3164 | 5.2131 | 0.2723  | 0.342714 |
| <i>Rnu5g</i>         | chr9:65201725-65201841    | 2.4834 | 2.9000 | 0.2237  | 0.823533 |
| <i>Ubap1l</i>        | chr9:65361059-65380377    | 0.2920 | 0.3025 | 0.0509  | 0.921715 |
| <i>Tmod2</i>         | chr9:75565620-75611325    | 0.0148 | 0.0473 | 1.6718  | 0.097433 |
| <i>5830418P13Rik</i> | chr9:103423577-103461255  | 0.1988 | 0.2572 | 0.3714  | 0.428696 |
| <i>Bfsp2</i>         | chr9:103424919-103480328  | 0.2159 | 0.4073 | 0.9154  | 0.007177 |
| <i>Tlr9</i>          | chr9:106222597-106226876  | 0.0441 | 0.1951 | 2.1455  | 0.007493 |
| <i>Gpr82</i>         | chrX:13661362-13667433    | 0.1101 | 0.6031 | 2.4543  | 0.001747 |
| <i>Gm14890</i>       | chrX:59196962-59197638    | 0.3608 | 0.6812 | 0.9167  | 0.064723 |
| <i>Gm7327</i>        | chrX:61785380-61786032    | 0.6671 | 0.8335 | 0.3212  | 0.116038 |
| <i>Gm14698</i>       | chrX:68821092-68825318    | 0.0906 | 0.1059 | 0.2250  | 0.592045 |
| <i>Tktl1</i>         | chrX:74177258-74208500    | 0.1535 | 0.3010 | 0.9719  | 0.015195 |

|                      |                          |        |         |         |          |
|----------------------|--------------------------|--------|---------|---------|----------|
| <i>Pin4</i>          | chrX:102119446-102127669 | 0.6122 | 0.9516  | 0.6364  | 0.183930 |
| <i>Btk</i>           | chrX:134542335-134583570 | 0.1158 | 0.2539  | 1.1332  | 0.015839 |
| <i>Gm5946</i>        | chrX:150220715-150226021 | 0.1518 | 0.1737  | 0.1941  | 0.816467 |
| <i>Gm15186</i>       | chrX:159588464-159589027 | 0.8979 | 1.2211  | 0.4435  | 0.197537 |
| <i>Lifr</i>          | chr15:7129558-7197489    | 0.0360 | 0.0890  | 1.3054  | 0.024078 |
| <i>Ctnnd2</i>        | chr15:30172592-31029311  | 0.0473 | 0.0934  | 0.9805  | 0.102358 |
| <i>Gm3362</i>        | chr15:37943326-37943792  | 1.0673 | 1.5337  | 0.5231  | 0.296783 |
| <i>Abra</i>          | chr15:41865292-41869720  | 0.2853 | 0.4625  | 0.6966  | 0.134180 |
| <i>Gm8221</i>        | chr15:77626073-77626637  | 0.1533 | 0.6601  | 2.1061  | 0.205350 |
| <i>4930415O2ORik</i> | chr15:98571003-98589588  | 0.5802 | 0.8090  | 0.4796  | 0.305792 |
| <i>Gm9763</i>        | chr15:99898286-99898556  | 1.5755 | 1.5575  | -0.0166 | 0.980076 |
| <i>Gm6043</i>        | chr14:29217638-29218130  | 0.5632 | 0.9448  | 0.7464  | 0.229373 |
| <i>Lrrc18</i>        | chr14:32991381-33015292  | 0.0885 | 0.2169  | 1.2939  | 0.058702 |
| <i>Ear2</i>          | chr14:44102653-44103534  | 0.4635 | 0.6514  | 0.4910  | 0.559947 |
| <i>Trav7d-4</i>      | chr14:52769752-52770390  | 0.6651 | 1.1472  | 0.7865  | 0.253266 |
| <i>Trav14d-1</i>     | chr14:52855613-52856165  | 0.4315 | 1.0473  | 1.2792  | 0.154522 |
| <i>Gm26751</i>       | chr14:55864310-55874735  | 0.0690 | 0.1327  | 0.9441  | 0.118656 |
| <i>Tnfrsf19</i>      | chr14:60963833-61046855  | 0.0788 | 0.0757  | -0.0569 | 0.933788 |
| <i>Lacc1</i>         | chr14:77024199-77036904  | 0.1247 | 0.2211  | 0.8262  | 0.089893 |
| <i>Zbtbd6</i>        | chr14:79451834-79454816  | 0.0989 | 0.1497  | 0.5974  | 0.314119 |
| <i>Prss30</i>        | chr17:23972125-23975230  | 0.2450 | 0.5134  | 1.0672  | 0.030340 |
| <i>Ccdc154</i>       | chr17:25162460-25171913  | 0.1999 | 0.2575  | 0.3651  | 0.376894 |
| <i>Lhfp15</i>        | chr17:28575717-28583593  | 0.1475 | 0.4082  | 1.4688  | 0.076751 |
| <i>Gm25447</i>       | chr17:31059603-31059731  | 2.1750 | 5.1916  | 1.2552  | 0.002935 |
| <i>Gm23111</i>       | chr17:33959662-33959767  | 3.9807 | 2.6006  | -0.6142 | 0.454122 |
| <i>Gm4152</i>        | chr17:33980485-33980744  | 1.3385 | 2.4374  | 0.8648  | 0.046235 |
| <i>Ncr3-ps</i>       | chr17:35180534-35184662  | 0.7597 | 0.7709  | 0.0209  | 0.970889 |
| <i>H2-M2</i>         | chr17:37480850-37483552  | 0.1486 | 0.6099  | 2.0373  | 0.150707 |
| <i>Spats1</i>        | chr17:45448936-45474938  | 0.2992 | 0.6697  | 1.1624  | 0.013038 |
| <i>Haao</i>          | chr17:83831355-83846790  | 0.3100 | 0.9145  | 1.5607  | 0.018480 |
| <i>0610012D04Rik</i> | chr17:87362238-87364462  | 0.9746 | 1.2255  | 0.3305  | 0.424840 |
| <i>Gm15738</i>       | chr16:13384173-13404686  | 0.7708 | 2.0726  | 1.4270  | 0.003680 |
| <i>Slc7a4</i>        | chr16:17572017-17576998  | 0.0980 | 0.0895  | -0.1312 | 0.842427 |
| <i>Bex6</i>          | chr16:32186191-32186890  | 0.3223 | 0.5786  | 0.8442  | 0.426323 |
| <i>Ctsf</i>          | chr19:4855128-4860912    | 0.0978 | 0.2057  | 1.0725  | 0.159196 |
| <i>Cdc42ep2</i>      | chr19:5917555-5924816    | 0.1852 | 0.2787  | 0.5895  | 0.474221 |
| <i>NA</i>            | chr19:6359373-6359433    | 1.4487 | 3.7465  | 1.3708  | 0.415479 |
| <i>Nrap</i>          | chr19:56320034-56390037  | 0.0470 | 0.1005  | 1.0957  | 0.074589 |
| <i>Slco5a1</i>       | chr1:12866548-12991177   | 0.0281 | 0.0600  | 1.0954  | 0.171488 |
| <i>Myo1b</i>         | chr1:51749764-51916071   | 0.0288 | 0.0660  | 1.1939  | 0.043977 |
| <i>Ccdc150</i>       | chr1:54250682-54368727   | 0.0662 | 0.1399  | 1.0802  | 0.087987 |
| <i>Snord70</i>       | chr1:59691933-59692020   | 3.9885 | 3.1857  | -0.3242 | 0.755013 |
| <i>Gm26293</i>       | chr1:59692508-59692592   | 4.6525 | 10.0770 | 1.1150  | 0.011347 |
| <i>Mreg</i>          | chr1:72159232-72212307   | 0.1418 | 0.3812  | 1.4266  | 0.016138 |
| <i>n-R5s215</i>      | chr1:85674881-85674985   | 4.2645 | 10.0743 | 1.2402  | 0.016771 |
| <i>Gm24148</i>       | chr1:86352007-86352087   | 4.8829 | 8.5209  | 0.8033  | 0.266209 |
| <i>Dnajb3</i>        | chr1:88204731-88205748   | 0.3074 | 0.5085  | 0.7260  | 0.137249 |
| <i>Tnfrsf11a</i>     | chr1:105780722-105847981 | 0.0562 | 0.1563  | 1.4761  | 0.071069 |
| <i>Steap3</i>        | chr1:120190756-120272705 | 0.0456 | 0.0647  | 0.5038  | 0.464388 |
| <i>Cacna1s</i>       | chr1:136052749-136119822 | 0.0286 | 0.1182  | 2.0476  | 0.008419 |
| <i>Rgs18</i>         | chr1:144752682-144775435 | 0.1036 | 0.2703  | 1.3832  | 0.149599 |
| <i>Cacna1e</i>       | chr1:154392518-154725920 | 0.0325 | 0.0761  | 1.2292  | 0.010654 |
| <i>Rasal2</i>        | chr1:157135182-157412595 | 0.0154 | 0.0450  | 1.5448  | 0.004759 |
| <i>Sec16b</i>        | chr1:157506727-157568425 | 0.0454 | 0.0951  | 1.0658  | 0.107341 |
| <i>NA</i>            | chr1:170277375-170285662 | 0.1148 | 0.3861  | 1.7501  | 0.043088 |
| <i>Cadm3</i>         | chr1:173334253-173367695 | 0.0444 | 0.0807  | 0.8618  | 0.204972 |
| <i>AI607873</i>      | chr1:173723429-173741809 | 0.0601 | 0.3086  | 2.3608  | 0.008410 |
| <i>Batf3</i>         | chr1:191098413-191108943 | 0.0513 | 0.3946  | 2.9429  | 0.194808 |
| <i>Gm21747</i>       | chr18:10781722-10785883  | 1.2226 | 1.3040  | 0.0930  | 0.729956 |
| <i>Gm6457</i>        | chr18:14570100-14570915  | 0.4676 | 0.5646  | 0.2721  | 0.620025 |
| <i>Celf4</i>         | chr18:25477631-25753983  | 0.0988 | 0.0930  | -0.0869 | 0.872692 |
| <i>Gm22200</i>       | chr18:34941233-34941300  | 5.7026 | 12.4567 | 1.1272  | 0.010947 |
| <i>Camk2a</i>        | chr18:60925617-60988152  | 0.0562 | 0.1032  | 0.8765  | 0.157830 |
| <i>Spire1</i>        | chr18:67488208-67552777  | 0.0604 | 0.2249  | 1.8981  | 0.000006 |
| <i>Gm13194</i>       | chr2:4942173-4942484     | 1.5680 | 2.8436  | 0.8587  | 0.054074 |
| <i>Gm13217</i>       | chr2:9041116-9042484     | 0.1926 | 0.5150  | 1.4189  | 0.059747 |
| <i>Itih2</i>         | chr2:10094592-10131396   | 0.0897 | 0.1656  | 0.8837  | 0.043362 |
| <i>NA</i>            | chr2:26014594-26014747   | 3.0492 | 5.7160  | 0.9066  | 0.054630 |
| <i>Pip5kl1</i>       | chr2:32574796-32583782   | 0.1264 | 0.2887  | 1.1921  | 0.020063 |
| <i>Olfml2a</i>       | chr2:38931977-38963753   | 0.0621 | 0.0794  | 0.3548  | 0.408529 |
| <i>Kynu</i>          | chr2:43555328-43682715   | 0.0569 | 0.1439  | 1.3400  | 0.039695 |

|                      |                           |        |         |         |          |
|----------------------|---------------------------|--------|---------|---------|----------|
| <i>Scn3a</i>         | chr2:65457117-65567627    | 0.0211 | 0.0527  | 1.3172  | 0.275643 |
| <i>Nostrin</i>       | chr2:69135799-69189330    | 0.0936 | 0.2656  | 1.5039  | 0.012240 |
| <i>Dnmt3l-ps1</i>    | chr2:83744483-83745736    | 0.3774 | 0.6592  | 0.8048  | 0.002863 |
| <i>B230118H07Rik</i> | chr2:101560780-101649532  | 0.1055 | 0.1202  | 0.1878  | 0.739891 |
| <i>Lmo2</i>          | chr2:103957985-103981878  | 0.2578 | 0.4590  | 0.8321  | 0.154129 |
| <i>Gm13991</i>       | chr2:116527842-116528490  | 0.6690 | 1.1385  | 0.7670  | 0.021568 |
| <i>Exd1</i>          | chr2:119516504-119547627  | 0.0774 | 0.1071  | 0.4682  | 0.024525 |
| <i>4930444E06Rik</i> | chr2:144243240-144244849  | 0.2141 | 0.5013  | 1.2273  | 0.120113 |
| <i>Snph</i>          | chr2:151590548-151632593  | 0.0487 | 0.0857  | 0.8149  | 0.238481 |
| <i>4930519P11Rik</i> | chr2:154612936-154613437  | 0.8205 | 0.8735  | 0.0904  | 0.847151 |
| <i>Cd40</i>          | chr2:165055626-165072948  | 0.0354 | 0.2008  | 2.5029  | 0.052178 |
| <i>Gm14274</i>       | chr2:172100620-172101235  | 0.5112 | 0.6683  | 0.3866  | 0.579573 |
| <i>Gm14429</i>       | chr2:177852151-177855503  | 0.0537 | 0.2877  | 2.4220  | 0.014303 |
| <i>C330013J21Rik</i> | chr2:177903339-177925613  | 0.2622 | 0.9842  | 1.9083  | 0.026606 |
| <i>Gm25184</i>       | chr2:181512549-181512712  | 3.6367 | 5.2144  | 0.5199  | 0.026877 |
| <i>mt-Tq</i>         | chrM:3771-3842            | 6.9298 | 8.8760  | 0.3571  | 0.380335 |
| <i>mt-Tm</i>         | chrM:3844-3913            | 6.2122 | 8.1440  | 0.3906  | 0.471721 |
| <i>mt-Tt</i>         | chrM:15288-15355          | 4.9440 | 13.7243 | 1.4730  | 0.011072 |
| <i>Rps24-ps2</i>     | chr3:3791896-3792295      | 0.9348 | 0.9793  | 0.0672  | 0.915316 |
| <i>Sirpb1a</i>       | chr3:15371826-15426427    | 0.3095 | 0.9043  | 1.5470  | 0.002442 |
| <i>Lrrc34</i>        | chr3:30624266-30647869    | 0.2847 | 0.2766  | -0.0415 | 0.869349 |
| <i>Gm12485</i>       | chr3:100680264-100680555  | 1.9796 | 3.7336  | 0.9154  | 0.024997 |
| <i>Slc44a5</i>       | chr3:153973435-154271722  | 0.0241 | 0.0435  | 0.8529  | 0.449285 |
| <i>Gm26254</i>       | chr4:31998623-31998741    | 2.6523 | 4.6644  | 0.8144  | 0.101529 |
| <i>Gm22849</i>       | chr4:34683878-34684185    | 0.6176 | 1.7842  | 1.5305  | 0.028126 |
| <i>n-R5s183</i>      | chr4:41303157-41303272    | 3.6229 | 4.9972  | 0.4640  | 0.262939 |
| <i>Gm25445</i>       | chr4:53720901-53721200    | 0.9042 | 1.4665  | 0.6977  | 0.285981 |
| <i>Gm12516</i>       | chr4:55392316-55392701    | 0.9600 | 1.7218  | 0.8429  | 0.076325 |
| <i>NA</i>            | chr4:88760773-88761584    | 0.3085 | 0.7330  | 1.2487  | 0.085235 |
| <i>Dock7</i>         | chr4:98936664-99120915    | 0.0422 | 0.0717  | 0.7632  | 0.119077 |
| <i>Gm22345</i>       | chr4:108537490-108537597  | 3.0687 | 5.3626  | 0.8053  | 0.113539 |
| <i>Mir761</i>        | chr4:109017654-109017730  | 3.5369 | 6.3928  | 0.8540  | 0.116303 |
| <i>9630013D21Rik</i> | chr4:109651528-109657853  | 0.1110 | 0.5383  | 2.2783  | 0.035395 |
| <i>Gm23143</i>       | chr4:117202527-117202643  | 3.0699 | 3.2367  | 0.0763  | 0.936938 |
| <i>Mycl</i>          | chr4:122995651-123002485  | 0.0476 | 0.1981  | 2.0556  | 0.016497 |
| <i>Gm25600</i>       | chr4:127108465-127108571  | 3.8175 | 3.9729  | 0.0575  | 0.923207 |
| <i>Gm24313</i>       | chr11:6619807-6619940     | 2.4033 | 3.4221  | 0.5099  | 0.486755 |
| <i>Eldr</i>          | chr11:16935153-16951282   | 0.1593 | 0.4336  | 1.4442  | 0.061349 |
| <i>Gm12713</i>       | chr11:26409206-26410501   | 0.2872 | 0.5852  | 1.0268  | 0.318704 |
| <i>Rab11fip4os2</i>  | chr11:79670371-79675128   | 0.5011 | 0.7728  | 0.6248  | 0.202507 |
| <i>Gm11440</i>       | chr11:85072468-85072995   | 0.4219 | 0.6969  | 0.7239  | 0.485682 |
| <i>Samd14</i>        | chr11:95009878-95026087   | 0.0721 | 0.1464  | 1.0217  | 0.167981 |
| <i>Gm11712</i>       | chr11:107386982-107388971 | 1.2624 | 2.3385  | 0.8895  | 0.034797 |
| <i>Gm11657</i>       | chr11:107994021-107994631 | 0.8348 | 1.2297  | 0.5587  | 0.369371 |
| <i>Gprc5c</i>        | chr11:114851151-114872617 | 0.0465 | 0.0636  | 0.4523  | 0.646881 |
| <i>Mir1938</i>       | chr12:40222711-40222811   | 5.5589 | 4.5602  | -0.2857 | 0.569436 |
| <i>Gm19898</i>       | chr12:99245670-99245921   | 1.2393 | 2.7675  | 1.1590  | 0.087114 |
| <i>Gpr137b</i>       | chr13:13357622-13393624   | 0.0938 | 0.2498  | 1.4139  | 0.155769 |
| <i>Tcrp-C4</i>       | chr13:19342185-19352343   | 0.4614 | 0.8329  | 0.8523  | 0.272308 |
| <i>5033430I15Rik</i> | chr13:45965252-45966500   | 0.5619 | 0.8615  | 0.6166  | 0.333916 |
| <i>Zfp934</i>        | chr13:62517499-62520544   | 0.2182 | 0.3641  | 0.7384  | 0.323147 |
| <i>Gm8185</i>        | chr13:76935162-76935831   | 0.5583 | 1.1097  | 0.9910  | 0.091864 |
| <i>Gm24507</i>       | chr13:90098980-90099114   | 2.5538 | 4.1970  | 0.7167  | 0.189242 |
| <i>Gpr113</i>        | chr5:30193430-30205722    | 0.0676 | 0.1575  | 1.2214  | 0.183934 |
| <i>Ccdc96</i>        | chr5:36484587-36488171    | 0.1073 | 0.1865  | 0.7978  | 0.163190 |
| <i>NA</i>            | chr5:105824510-105832434  | 0.1213 | 0.1947  | 0.6829  | 0.202573 |
| <i>Gm15547</i>       | chr5:121530562-121530895  | 1.3623 | 2.0599  | 0.5965  | 0.233244 |
| <i>C130050O18Rik</i> | chr5:139405279-139415623  | 0.0833 | 0.1760  | 1.0795  | 0.068550 |
| <i>Mkln1os</i>       | chr6:31366884-31398773    | 0.0946 | 0.1641  | 0.7940  | 0.291324 |
| <i>Gm7507</i>        | chr6:84812239-84813247    | 0.3816 | 0.4003  | 0.0690  | 0.906430 |
| <i>Gm10443</i>       | chr6:86334006-86334316    | 0.4430 | 1.2918  | 1.5441  | 0.256528 |
| <i>Ccdc37</i>        | chr6:90403735-90428797    | 0.1168 | 0.2624  | 1.1675  | 0.057255 |
| <i>Gm10011</i>       | chr6:149147518-149147865  | 0.8558 | 1.4746  | 0.7850  | 0.230424 |
| <i>Gm15784</i>       | chr6:149361685-149363147  | 0.1334 | 0.2768  | 1.0531  | 0.199935 |
| <i>Gm15773</i>       | chr7:12603195-12604643    | 0.2269 | 0.4326  | 0.9311  | 0.279759 |
| <i>Gm25282</i>       | chr7:75668872-75668956    | 3.4909 | 5.0428  | 0.5306  | 0.536374 |
| <i>BC051019</i>      | chr7:109712180-109723850  | 0.2280 | 0.2292  | 0.0073  | 0.991528 |
| <i>Scnn1b</i>        | chr7:121865110-121918515  | 0.1226 | 0.2030  | 0.7271  | 0.377645 |
| <i>Gm5903</i>        | chr7:130343524-130354373  | 0.1100 | 0.1464  | 0.4114  | 0.183496 |
| <i>lfitm1</i>        | chr7:140967220-140969825  | 0.2194 | 0.5980  | 1.4465  | 0.073287 |
| <i>1700029H14Rik</i> | chr8:13550732-13562461    | 0.2200 | 0.5872  | 1.4164  | 0.029851 |

|               |                           |        |         |         |          |
|---------------|---------------------------|--------|---------|---------|----------|
| Gm3235        | chr8:91621447-91629729    | 0.4968 | 1.0527  | 1.0834  | 0.068562 |
| Tsnaxip1      | chr8:105827743-105844676  | 0.1548 | 0.2471  | 0.6749  | 0.275623 |
| 1190005106Rik | chr8:120608601-120647632  | 0.2784 | 0.3862  | 0.4721  | 0.487739 |
| Tubb3         | chr8:123411423-123422015  | 0.2229 | 0.4711  | 1.0799  | 0.095782 |
| Gm23008       | chr9:20890756-20890836    | 6.2648 | 10.0265 | 0.6785  | 0.069003 |
| Lct1          | chr9:64117146-64138118    | 0.1359 | 0.2089  | 0.6198  | 0.298676 |
| Aph1c         | chr9:66814993-66834726    | 0.0434 | 0.1009  | 1.2186  | 0.074955 |
| Rpl22-ps1     | chrX:8038610-8038996      | 1.4001 | 1.6218  | 0.2120  | 0.647351 |
| Spin4         | chrX:95022506-95026682    | 0.0638 | 0.2712  | 2.0883  | 0.089569 |
| Gm14858       | chrX:102252521-102365498  | 0.1339 | 0.3481  | 1.3777  | 0.164277 |
| Gm9143        | chrX:103037623-103038368  | 0.6818 | 0.7069  | 0.0520  | 0.900286 |
| Gm9670        | chrX:103506811-103507589  | 0.6427 | 1.7694  | 1.4609  | 0.014396 |
| Gm14869       | chrX:109120800-109121684  | 0.3573 | 0.6428  | 0.8474  | 0.271041 |
| Mdm4-ps       | chrX:128261410-128267924  | 0.0881 | 0.1245  | 0.4988  | 0.268506 |
| Arl13a        | chrX:134187500-134208028  | 0.0895 | 0.3476  | 1.9578  | 0.049403 |
| Mroh5         | chr15:73761409-73839699   | 0.0537 | 0.1037  | 0.9475  | 0.205006 |
| 2010109103Rik | chr15:74878335-74881704   | 0.2188 | 0.4834  | 1.1433  | 0.127594 |
| Scube1        | chr15:83602582-83725021   | 0.0502 | 0.0556  | 0.1469  | 0.735513 |
| Gm10916       | chr14:50769247-50769730   | 0.9572 | 1.4519  | 0.6011  | 0.173016 |
| Lrrc16b       | chr14:55491092-55508246   | 0.0339 | 0.0920  | 1.4392  | 0.155599 |
| Hspa1b        | chr17:34956435-34959238   | 0.0194 | 0.1375  | 2.8223  | 0.305635 |
| Ier3          | chr17:35821683-35822923   | 0.2115 | 0.6060  | 1.5190  | 0.019079 |
| Gm10499       | chr17:36141757-36145923   | 0.1921 | 0.4027  | 1.0675  | 0.153999 |
| Gm25973       | chr17:36842225-36842352   | 2.6844 | 3.8366  | 0.5153  | 0.394607 |
| Gm17168       | chr17:57041774-57047143   | 1.0993 | 1.3210  | 0.2650  | 0.619682 |
| Cebpd         | chr16:15887285-15888466   | 0.3421 | 0.4255  | 0.3146  | 0.612801 |
| Tssk1         | chr16:17894202-17895651   | 0.1525 | 0.3703  | 1.2800  | 0.257720 |
| Gm15694       | chr16:31987177-31987460   | 1.6131 | 2.2758  | 0.4965  | 0.099764 |
| Gm17227       | chr19:7297657-7304528     | 0.4669 | 0.8078  | 0.7908  | 0.084413 |
| Gsto2         | chr19:47865544-47886324   | 0.2186 | 0.3297  | 0.5927  | 0.356907 |
| Slc11a1       | chr1:74375202-74386062    | 0.1133 | 0.1633  | 0.5268  | 0.384222 |
| Serpine2      | chr1:79794196-79858696    | 0.0918 | 0.1153  | 0.3283  | 0.667930 |
| Fbxo36        | chr1:84839840-84900487    | 0.1800 | 0.2846  | 0.6607  | 0.203356 |
| Gm25612       | chr1:134505337-134505463  | 3.6155 | 5.9349  | 0.7150  | 0.026538 |
| Mroh3         | chr1:136181473-136207097  | 0.1070 | 0.2897  | 1.4364  | 0.195360 |
| Pla2g4a       | chr1:149829617-149961290  | 0.0443 | 0.1020  | 1.2025  | 0.021424 |
| Selp          | chr1:164115263-164150026  | 0.0906 | 0.1995  | 1.1396  | 0.041995 |
| Gm13184       | chr2:3468612-3474546      | 0.7111 | 1.1470  | 0.6898  | 0.179445 |
| Gm13262       | chr2:9906177-9914678      | 0.1174 | 0.3258  | 1.4724  | 0.111985 |
| Nron          | chr2:33805815-33813591    | 0.1527 | 0.2590  | 0.7625  | 0.227527 |
| Gm24644       | chr2:104040668-104040807  | 2.6118 | 5.1403  | 0.9768  | 0.090313 |
| Gm14057       | chr2:130803500-130803982  | 0.5739 | 1.1772  | 1.0366  | 0.132594 |
| Jag1          | chr2:137081455-137116644  | 0.0418 | 0.0935  | 1.1629  | 0.054292 |
| Gm11460       | chr2:165666496-165666857  | 0.8964 | 1.2986  | 0.5348  | 0.488743 |
| Gm25265       | chr2:166682073-166682420  | 1.2989 | 1.7233  | 0.4080  | 0.264649 |
| Rps19-ps4     | chr18:42252397-42252835   | 0.7520 | 0.9309  | 0.3079  | 0.622036 |
| Ticam2        | chr18:46559154-46574533   | 0.0975 | 0.2323  | 1.2527  | 0.102069 |
| Gm4950        | chr18:51865263-51865881   | 0.3992 | 0.4497  | 0.1719  | 0.873027 |
| Pde6a         | chr18:61220481-61289924   | 0.0680 | 0.1417  | 1.0596  | 0.137061 |
| Gm10532       | chr18:75514644-75522806   | 0.1122 | 0.1638  | 0.5469  | 0.480912 |
| mt-Tw         | chrM:4949-5016            | 3.0318 | 11.6922 | 1.9473  | 0.002342 |
| Kcnmb3        | chr3:32472320-32491969    | 0.1401 | 0.8507  | 2.6021  | 0.086791 |
| Rpl32-ps      | chr3:69716985-69717393    | 1.1048 | 1.2305  | 0.1554  | 0.731767 |
| Gm8813        | chr3:84552857-84553452    | 0.4816 | 1.1111  | 1.2060  | 0.042713 |
| Bcl2l15       | chr3:103832600-103854618  | 0.1346 | 0.3257  | 1.2754  | 0.045006 |
| Ccin          | chr4:43983503-43985533    | 0.1618 | 0.1553  | -0.0588 | 0.950140 |
| Klf4          | chr4:55527142-55532466    | 0.0857 | 0.2284  | 1.4132  | 0.011481 |
| Gm11210       | chr4:62705980-62725737    | 0.6235 | 1.0601  | 0.7658  | 0.183355 |
| Gm11212       | chr4:63350410-63353846    | 0.5454 | 1.7387  | 1.6725  | 0.049424 |
| 8030451A03Rik | chr4:63979853-64149924    | 0.0751 | 0.2646  | 1.8173  | 0.136594 |
| Gm11226       | chr4:70248635-70249373    | 0.3611 | 0.5960  | 0.7229  | 0.393899 |
| Gm12607       | chr4:89161698-89162191    | 0.7315 | 1.2077  | 0.7233  | 0.087541 |
| Ak4           | chr4:101419276-101466995  | 0.0602 | 0.1365  | 1.1801  | 0.006017 |
| Ldlrad1       | chr4:107209179-107218060  | 0.3164 | 0.5197  | 0.7161  | 0.298457 |
| Kdf1          | chr4:133518962-133530790  | 0.1629 | 0.2575  | 0.6606  | 0.145126 |
| Ccnd3-ps      | chr4:139345299-139346180  | 0.5880 | 0.9454  | 0.6851  | 0.025360 |
| Gm16074       | chr10:3992370-3992814     | 0.6682 | 1.1921  | 0.8352  | 0.158556 |
| Mir5104       | chr10:7836380-7836474     | 2.3954 | 5.3317  | 1.1543  | 0.103961 |
| Nodal         | chr10:61417971-61425338   | 0.1896 | 0.3330  | 0.8131  | 0.110788 |
| Aldh1l2       | chr10:83487449-83534140   | 0.0391 | 0.0909  | 1.2161  | 0.091612 |
| Slc39a5       | chr10:128395933-128401224 | 0.1461 | 0.3171  | 1.1182  | 0.040660 |

|               |                           |        |         |         |          |
|---------------|---------------------------|--------|---------|---------|----------|
| Gm26347       | chr10:128435913-128436044 | 2.6792 | 4.1504  | 0.6315  | 0.176903 |
| Wsb2-ps       | chr11:62749851-62752787   | 0.0542 | 0.1104  | 1.0263  | 0.333392 |
| Gm12303       | chr11:68035037-68035710   | 0.6549 | 0.7804  | 0.2530  | 0.647586 |
| P2rx1         | chr11:72999102-73015200   | 0.1038 | 0.1305  | 0.3311  | 0.691371 |
| Gm11425       | chr11:83027499-83027997   | 0.7039 | 0.9762  | 0.4719  | 0.365053 |
| Gm11439       | chr11:85095140-85095549   | 1.2004 | 2.2569  | 0.9108  | 0.328523 |
| Mir378b       | chr11:88352772-88352864   | 1.9202 | 3.7908  | 0.9813  | 0.355565 |
| Mir5119       | chr11:98262605-98262662   | 8.1351 | 9.3005  | 0.1931  | 0.707900 |
| Cep112        | chr11:108425191-108860615 | 0.0256 | 0.1079  | 2.0758  | 0.062978 |
| Gm23167       | chr12:4999265-4999368     | 0.8486 | 3.0436  | 1.8426  | 0.251003 |
| Klhl29        | chr12:5077471-5375682     | 0.0313 | 0.0873  | 1.4788  | 0.054942 |
| Akap6         | chr12:52699382-53151015   | 0.0335 | 0.0693  | 1.0491  | 0.323955 |
| Gm3086        | chr12:69963472-69969721   | 0.7968 | 0.9563  | 0.2633  | 0.526096 |
| Gm7985        | chr12:71846310-71847291   | 0.2590 | 0.4921  | 0.9260  | 0.270851 |
| Flrt2         | chr12:95692225-95785215   | 0.0303 | 0.1331  | 2.1372  | 0.090575 |
| Gm20036       | chr12:101913239-101915335 | 0.4328 | 0.7676  | 0.8266  | 0.167530 |
| Serpina9      | chr12:103994742-104013755 | 0.0909 | 0.2465  | 1.4397  | 0.030699 |
| Amn           | chr12:111271110-111276426 | 0.1220 | 0.3176  | 1.3802  | 0.195673 |
| Ighj1         | chr12:113429780-113429833 | 4.5102 | 11.0310 | 1.2903  | 0.211434 |
| Ighv3-6       | chr12:114288156-114288582 | 0.0001 | 0.8044  | 12.9736 | 0.239954 |
| Gm26601       | chr13:9387138-9391741     | 0.1381 | 0.2839  | 1.0394  | 0.061038 |
| Tcrg-C2       | chr13:19305059-19307551   | 0.7632 | 1.0004  | 0.3904  | 0.570409 |
| 9330162012Rik | chr13:24937400-24941417   | 0.0636 | 0.1396  | 1.1345  | 0.074894 |
| Gm11365       | chr13:29940282-29942261   | 0.1334 | 0.6811  | 2.3520  | 0.076671 |
| Gmpr          | chr13:45507443-45546382   | 0.0624 | 0.1947  | 1.6404  | 0.245832 |
| Gm25109       | chr13:94517161-94517275   | 1.5039 | 3.1129  | 1.0496  | 0.304570 |
| Gm21976       | chr13:98279886-98307154   | 0.2501 | 0.4237  | 0.7607  | 0.235073 |
| Esm1          | chr13:113209658-113218098 | 0.1807 | 0.8709  | 2.2688  | 0.156724 |
| Ppbp          | chr5:90768517-90770060    | 0.3854 | 0.4090  | 0.0857  | 0.873867 |
| Gm24097       | chr5:104936650-104936757  | 4.3695 | 4.1728  | -0.0665 | 0.889568 |
| Gm8152        | chr5:107381380-107382017  | 0.1659 | 0.4641  | 1.4840  | 0.288619 |
| Vwde          | chr6:13185612-13224965    | 0.0378 | 0.0967  | 1.3566  | 0.279603 |
| Fscn3         | chr6:28427788-28438622    | 0.1492 | 0.1857  | 0.3160  | 0.701510 |
| Gm15532       | chr6:119892919-119893803  | 0.1972 | 0.3260  | 0.7249  | 0.561794 |
| Klra2         | chr6:131219222-131247362  | 0.0835 | 0.1438  | 0.7839  | 0.555704 |
| Gm17088       | chr6:134168878-134172007  | 0.6568 | 1.1135  | 0.7615  | 0.120251 |
| Ncr1          | chr7:4337723-4345164      | 0.1397 | 0.4671  | 1.7419  | 0.311883 |
| Hif3a         | chr7:17031506-17062427    | 0.0725 | 0.1099  | 0.6003  | 0.250284 |
| Hipk4         | chr7:27523266-27531175    | 0.1111 | 0.1138  | 0.0347  | 0.963843 |
| Gm23368       | chr7:30100839-30100935    | 4.8903 | 6.7354  | 0.4618  | 0.407207 |
| Hpn           | chr7:31098724-31115290    | 0.1347 | 0.2137  | 0.6657  | 0.141269 |
| Zfp939        | chr7:39449517-39474335    | 0.1296 | 0.2946  | 1.1848  | 0.025989 |
| Dlg2          | chr7:91090705-92447003    | 0.0202 | 0.0886  | 2.1334  | 0.153929 |
| Phox2a        | chr7:101818312-101823166  | 0.1379 | 0.3423  | 1.3118  | 0.037147 |
| 9130208D14Rik | chr7:105824222-105831515  | 0.0193 | 0.0712  | 1.8823  | 0.019238 |
| Trim66        | chr7:109449005-109508134  | 0.0177 | 0.0292  | 0.7231  | 0.523882 |
| Gm4535        | chr7:141406529-141407326  | 0.2181 | 0.7584  | 1.7979  | 0.016547 |
| Tnfsf13b      | chr8:10006842-10035441    | 0.1689 | 0.6231  | 1.8835  | 0.231557 |
| Enpp6         | chr8:46986924-47094895    | 0.0435 | 0.1081  | 1.3139  | 0.066362 |
| Frem3         | chr8:80611079-80695356    | 0.0899 | 0.0795  | -0.1770 | 0.689656 |
| 4930579O11Rik | chr8:81665875-81667118    | 0.1211 | 0.6280  | 2.3751  | 0.098060 |
| A330008L17Rik | chr8:99416641-99733438    | 0.0184 | 0.0685  | 1.8990  | 0.066072 |
| Tppp3         | chr8:105467492-105471526  | 0.1783 | 0.3276  | 0.8777  | 0.010675 |
| Gm23193       | chr8:111194963-111195045  | 1.8502 | 4.2607  | 1.2034  | 0.522849 |
| Vat1l         | chr8:114205611-114374071  | 0.0571 | 0.1920  | 1.7498  | 0.161449 |
| Adamts8       | chr9:30942561-30963838    | 0.0541 | 0.1034  | 0.9350  | 0.168890 |
| Tmem45b       | chr9:31426198-31464238    | 0.3186 | 0.2801  | -0.1859 | 0.705556 |
| Tmem25        | chr9:44793775-44799307    | 0.1380 | 0.2311  | 0.7435  | 0.243743 |
| Ttc36         | chr9:44799399-44802951    | 0.4744 | 0.8397  | 0.8237  | 0.288938 |
| Gm684         | chr9:51270257-51278554    | 0.1612 | 0.3701  | 1.1989  | 0.225045 |
| Dmxl2         | chr9:54365157-54501760    | 0.0187 | 0.0302  | 0.6937  | 0.439299 |
| Irga11        | chr9:62677825-62783982    | 0.0735 | 0.0973  | 0.4032  | 0.549493 |
| Slc24a1       | chr9:64922860-64951607    | 0.0739 | 0.1459  | 0.9806  | 0.233341 |
| Gm16144       | chr9:69477028-69479598    | 0.3750 | 0.5190  | 0.4689  | 0.530654 |
| Gm24615       | chr9:70475483-70475596    | 1.2444 | 3.9769  | 1.6762  | 0.072886 |
| 6430571L13Rik | chr9:107340601-107352422  | 0.1486 | 0.2087  | 0.4899  | 0.121976 |
| Gm23034       | chr9:108795242-108795388  | 2.1243 | 3.4384  | 0.6948  | 0.145665 |
| Zfp651        | chr9:121760032-121771742  | 0.0482 | 0.1093  | 1.1800  | 0.204894 |
| Gm25341       | chr9:122812563-122812831  | 0.5678 | 1.6037  | 1.4980  | 0.068778 |
| Gm9159        | chrX:103597770-103598336  | 0.7488 | 0.8717  | 0.2193  | 0.629465 |
| Gm26415       | chrX:109115224-109115516  | 0.3585 | 1.0400  | 1.5364  | 0.276046 |

|                      |                           |        |        |         |          |
|----------------------|---------------------------|--------|--------|---------|----------|
| <i>Col4a6</i>        | chrX:141165402-141474076  | 0.0373 | 0.0575 | 0.6243  | 0.437851 |
| <i>Gm5763</i>        | chrX:142631482-142634015  | 0.1373 | 0.2680 | 0.9646  | 0.328728 |
| <i>Scml2</i>         | chrX:161117192-161258213  | 0.0654 | 0.0898 | 0.4578  | 0.208141 |
| <i>Gm21887</i>       | chrX:170009658-170019281  | 0.5940 | 0.9133 | 0.6208  | 0.020627 |
| <i>n-R5s39</i>       | chr15:39146379-39146487   | 1.2589 | 2.5171 | 0.9997  | 0.492789 |
| <i>Csf2rb2</i>       | chr15:78282516-78305603   | 0.0153 | 0.1006 | 2.7184  | 0.024611 |
| <i>Gm15722</i>       | chr15:86087639-86090060   | 0.4691 | 0.9512 | 1.0199  | 0.074899 |
| <i>Lima1</i>         | chr15:99778469-99875428   | 0.0622 | 0.0850 | 0.4515  | 0.307317 |
| <i>Cela1</i>         | chr15:100674424-100687920 | 0.3286 | 0.5957 | 0.8584  | 0.245532 |
| <i>1700087M22Rik</i> | chr14:30770680-30778004   | 1.6596 | 2.0689 | 0.3181  | 0.622249 |
| <i>Trav6-3</i>       | chr14:53428710-53430375   | 1.0013 | 1.2316 | 0.2986  | 0.648883 |
| <i>Rem2</i>          | chr14:54476099-54480431   | 0.1860 | 0.3147 | 0.7584  | 0.260894 |
| <i>Cldn20</i>        | chr17:3532553-3533213     | 0.4714 | 0.9553 | 1.0191  | 0.111527 |
| <i>Gm2885</i>        | chr17:6798389-6827990     | 0.0956 | 0.2360 | 1.3029  | 0.317738 |
| <i>Gm16386</i>       | chr17:22784797-22817741   | 0.2406 | 0.6219 | 1.3699  | 0.046869 |
| <i>Prss41</i>        | chr17:23836784-23844172   | 0.1466 | 0.2050 | 0.4838  | 0.525108 |
| <i>Mir3547</i>       | chr17:25245540-25245650   | 2.5217 | 3.3913 | 0.4275  | 0.666928 |
| <i>Gm10012</i>       | chr17:25901855-25902227   | 0.9642 | 1.4360 | 0.5747  | 0.268635 |
| <i>NA</i>            | chr17:30485510-30485963   | 0.7746 | 1.2858 | 0.7312  | 0.181139 |
| <i>Pla2g7</i>        | chr17:43568097-43612201   | 0.0977 | 0.1820 | 0.8970  | 0.215420 |
| <i>Abcg8</i>         | chr17:84676301-84700333   | 0.1058 | 0.1069 | 0.0161  | 0.977780 |
| <i>Gm24145</i>       | chr16:11167104-11167267   | 2.2527 | 3.8074 | 0.7572  | 0.157307 |
| <i>Gm15897</i>       | chr16:11494820-11496306   | 0.1347 | 0.3556 | 1.4002  | 0.175601 |
| <i>Snord66</i>       | chr16:20684238-20684313   | 4.8010 | 7.7928 | 0.6988  | 0.072959 |
| <i>Gm15696</i>       | chr16:31970361-31970806   | 0.8673 | 1.2257 | 0.4991  | 0.144345 |
| <i>Boc</i>           | chr16:44485044-44558897   | 0.0421 | 0.1411 | 1.7446  | 0.125046 |
| <i>Epha3</i>         | chr16:63543537-63864158   | 0.0065 | 0.0827 | 3.6601  | 0.025157 |
| <i>B3galt5</i>       | chr16:96235800-96319859   | 0.0403 | 0.0782 | 0.9566  | 0.295003 |
| <i>Sema4c</i>        | chr1:36548641-36558349    | 0.0980 | 0.1531 | 0.6436  | 0.359672 |
| <i>Ecel1</i>         | chr1:87147654-87156521    | 0.0541 | 0.2320 | 2.0999  | 0.220219 |
| <i>Tnn</i>           | chr1:160085035-160153580  | 0.0496 | 0.1317 | 1.4089  | 0.026763 |
| <i>Tgfb2</i>         | chr1:186623185-186705992  | 0.0477 | 0.0778 | 0.7051  | 0.557428 |
| <i>Gpr152</i>        | chr19:4139798-4145738     | 0.0855 | 0.1395 | 0.7053  | 0.280332 |
| <i>Naaladl1</i>      | chr19:6105781-6115792     | 0.1965 | 0.1712 | -0.1984 | 0.667092 |
| <i>Gldc</i>          | chr19:30098448-30175418   | 0.0971 | 0.1546 | 0.6700  | 0.286835 |
| <i>Pde6c</i>         | chr19:38132780-38183947   | 0.0660 | 0.1639 | 1.3133  | 0.081894 |
| <i>Cyp17a1</i>       | chr19:46667164-46672974   | 0.0564 | 0.2128 | 1.9157  | 0.025341 |
| <i>Neurl1a</i>       | chr19:47178819-47259440   | 0.0853 | 0.1487 | 0.8015  | 0.316791 |
| <i>Gucy2g</i>        | chr19:55198296-55241236   | 0.0322 | 0.1784 | 2.4690  | 0.089020 |
| <i>Sh3rf2</i>        | chr18:42053666-42158960   | 0.0491 | 0.2431 | 2.3080  | 0.083264 |
| <i>Gm22005</i>       | chr2:3291377-3291518      | 2.2201 | 3.7715 | 0.7645  | 0.217720 |
| <i>Gm13388</i>       | chr2:6431785-6436033      | 0.3682 | 1.5950 | 2.1149  | 0.001752 |
| <i>Gm13387</i>       | chr2:25122602-25145396    | 0.0889 | 0.1383 | 0.6377  | 0.436926 |
| <i>Fcnaos</i>        | chr2:25607891-25631761    | 0.2275 | 0.3072 | 0.4331  | 0.464660 |
| <i>Barhl1</i>        | chr2:28907678-28916668    | 0.0923 | 0.1723 | 0.9001  | 0.068147 |
| <i>Gm13428</i>       | chr2:36137338-36137703    | 0.6063 | 1.0372 | 0.7746  | 0.341475 |
| <i>Gm13510</i>       | chr2:49185017-49185446    | 0.9052 | 1.2269 | 0.4387  | 0.456628 |
| <i>NA</i>            | chr2:73012853-73012927    | 5.7026 | 8.6405 | 0.5995  | 0.563183 |
| <i>Gm13665</i>       | chr2:73116747-73117275    | 0.6745 | 0.6294 | -0.0997 | 0.919984 |
| <i>D230022J07Rik</i> | chr2:73386969-73420498    | 0.2288 | 0.4706 | 1.0406  | 0.246978 |
| <i>Gm13689</i>       | chr2:80549711-80550396    | 0.4332 | 0.6710 | 0.6312  | 0.483135 |
| <i>n-R5s200</i>      | chr2:84700747-84700860    | 2.0440 | 3.6882 | 0.8516  | 0.401656 |
| <i>4933423P22Rik</i> | chr2:90479235-90488425    | 0.0348 | 0.1504 | 2.1129  | 0.075115 |
| <i>Elf5</i>          | chr2:103411687-103450989  | 0.0541 | 0.0641 | 0.2429  | 0.757923 |
| <i>Lgr4</i>          | chr2:109917646-110014257  | 0.0354 | 0.0766 | 1.1136  | 0.155324 |
| <i>Kcnp3</i>         | chr2:127456497-127522094  | 0.0433 | 0.1514 | 1.8062  | 0.053400 |
| <i>Slc24a3</i>       | chr2:145167753-145642166  | 0.0631 | 0.1822 | 1.5300  | 0.123014 |
| <i>Gm24411</i>       | chr2:158356423-158356554  | 4.1334 | 4.7153 | 0.1900  | 0.602900 |
| <i>Gm2464</i>        | chr3:13471905-13474596    | 0.0531 | 0.1562 | 1.5551  | 0.271164 |
| <i>Oaz3</i>          | chr3:94433389-94436616    | 0.2278 | 0.4547 | 0.9971  | 0.234954 |
| <i>NA</i>            | chr3:103324232-103324303  | 3.4205 | 5.1039 | 0.5774  | 0.558515 |
| <i>Oaz2-ps</i>       | chr3:135525963-135526532  | 0.6088 | 1.0055 | 0.7238  | 0.550781 |
| <i>Gm24457</i>       | chr3:142772971-142773076  | 1.3580 | 4.7317 | 1.8008  | 0.013158 |
| <i>Cdh17</i>         | chr4:11758146-11817895    | 0.0350 | 0.0987 | 1.4977  | 0.377275 |
| <i>Gm11839</i>       | chr4:12114283-12116236    | 0.0960 | 0.1646 | 0.7779  | 0.460784 |
| <i>Gm11847</i>       | chr4:12232779-12238024    | 0.0336 | 0.1335 | 1.9898  | 0.135781 |
| <i>Gm11865</i>       | chr4:16246268-16249514    | 0.3583 | 0.5213 | 0.5412  | 0.454550 |
| <i>NA</i>            | chr4:56897625-56897757    | 1.5573 | 3.0828 | 0.9852  | 0.241171 |
| <i>Tlr4</i>          | chr4:66827583-66930284    | 0.0621 | 0.1789 | 1.5256  | 0.041971 |
| <i>Gm16686</i>       | chr4:88755194-88755590    | 0.4378 | 1.1838 | 1.4352  | 0.072860 |
| <i>Gm12850</i>       | chr4:107270433-107270869  | 0.8293 | 1.2146 | 0.5505  | 0.354108 |



|                      |                           |        |        |         |          |
|----------------------|---------------------------|--------|--------|---------|----------|
| <i>Gm23138</i>       | chr4:108498043-108498146  | 3.4168 | 4.3127 | 0.3360  | 0.627360 |
| <i>Gm12808</i>       | chr4:109754413-109754817  | 0.6297 | 0.8955 | 0.5080  | 0.578927 |
| <i>Fndc5</i>         | chr4:129136998-129144593  | 0.1000 | 0.2186 | 1.1284  | 0.009556 |
| <i>Gm15951</i>       | chr4:147520467-147520867  | 0.7451 | 0.8540 | 0.1968  | 0.791827 |
| <i>Gm16024</i>       | chr4:155616408-155616787  | 2.8832 | 3.1899 | 0.1458  | 0.803200 |
| <i>NA</i>            | chr4:156130512-156133415  | 0.0663 | 0.1672 | 1.3348  | 0.177714 |
| <i>Perp</i>          | chr10:18845070-18857073   | 0.1485 | 0.2612 | 0.8150  | 0.310530 |
| <i>2010107G23Rik</i> | chr10:62107654-62143920   | 0.1088 | 0.2155 | 0.9867  | 0.079932 |
| <i>Rtkn2</i>         | chr10:67979569-68059740   | 0.0282 | 0.0874 | 1.6310  | 0.057773 |
| <i>Tmem26</i>        | chr10:68723745-68782654   | 0.0195 | 0.0566 | 1.5383  | 0.379295 |
| <i>Tle6</i>          | chr10:81590903-81601073   | 0.0788 | 0.1552 | 0.9784  | 0.142617 |
| <i>Dram1</i>         | chr10:88322803-88379080   | 0.0962 | 0.1432 | 0.5735  | 0.493925 |
| <i>Pawr</i>          | chr10:108332188-108414391 | 0.1861 | 0.2729 | 0.5527  | 0.493189 |
| <i>Kif5a</i>         | chr10:127225695-127263363 | 0.0470 | 0.0880 | 0.9062  | 0.023849 |
| <i>Selm</i>          | chr11:3514683-3517351     | 0.0695 | 0.3037 | 2.1280  | 0.195148 |
| <i>Gm12039</i>       | chr11:21280044-21280224   | 1.6159 | 2.4175 | 0.5812  | 0.386957 |
| <i>Ebf1</i>          | chr11:44617316-45008091   | 0.0224 | 0.0294 | 0.3888  | 0.709643 |
| <i>Gm12186</i>       | chr11:48996686-48997713   | 0.1987 | 0.5258 | 1.4037  | 0.013339 |
| <i>B9d1</i>          | chr11:61505143-61512931   | 0.0902 | 0.1932 | 1.0997  | 0.359893 |
| <i>Gm10418</i>       | chr11:70540022-70540600   | 0.2892 | 0.6190 | 1.0979  | 0.260344 |
| <i>Aanat</i>         | chr11:116586431-116597680 | 0.2068 | 0.3379 | 0.7087  | 0.276263 |
| <i>St6galnac1</i>    | chr11:116765024-116775507 | 0.0531 | 0.1548 | 1.5447  | 0.244587 |
| <i>Gm22343</i>       | chr12:4394481-4394767     | 1.6463 | 1.4580 | -0.1753 | 0.737973 |
| <i>1700030C10Rik</i> | chr12:20814256-20815727   | 0.1535 | 0.4551 | 1.5683  | 0.053426 |
| <i>Gm10478</i>       | chr12:20896238-20896638   | 0.9215 | 1.3554 | 0.5566  | 0.200414 |
| <i>Atxn711os1</i>    | chr12:33193993-33228854   | 0.1817 | 0.1363 | -0.4149 | 0.638423 |
| <i>Scin</i>          | chr12:40059768-40134228   | 0.0974 | 0.1971 | 1.0171  | 0.338445 |
| <i>Gm17138</i>       | chr12:86714985-86715444   | 0.7582 | 0.8165 | 0.1069  | 0.860276 |
| <i>Gm26512</i>       | chr12:90738200-90750693   | 0.0567 | 0.0768 | 0.4367  | 0.684116 |
| <i>Adssl1</i>        | chr12:112620044-112641354 | 0.1192 | 0.3441 | 1.5292  | 0.072000 |
| <i>Ighg2b</i>        | chr12:113306388-113307933 | 0.1203 | 0.9935 | 3.0455  | 0.394496 |
| <i>Ighj3</i>         | chr12:113429084-113429132 | 0.7598 | 7.8558 | 3.3701  | 0.037326 |
| <i>Ighv5-16</i>      | chr12:113838525-113838983 | 0.0001 | 0.7319 | 12.8375 | 0.275964 |
| <i>Vipr2</i>         | chr12:116077725-116146261 | 0.0659 | 0.1450 | 1.1373  | 0.022763 |
| <i>Gm20658</i>       | chr12:116102768-116138648 | 0.0060 | 0.1265 | 4.3989  | 0.161808 |
| <i>Gm17622</i>       | chr13:96490732-96491120   | 7.7224 | 8.0320 | 0.0567  | 0.896611 |
| <i>Fst</i>           | chr13:114452261-114458730 | 0.0572 | 0.0762 | 0.4137  | 0.812793 |
| <i>Nsun7</i>         | chr5:66259911-66298016    | 0.0263 | 0.0884 | 1.7491  | 0.179778 |
| <i>Gm2199</i>        | chr5:80900749-80901623    | 0.2171 | 0.5265 | 1.2780  | 0.089609 |
| <i>Gc</i>            | chr5:89417510-89457898    | 0.0279 | 0.1269 | 2.2856  | 0.304151 |
| <i>Rassf6</i>        | chr5:90603075-90640487    | 0.0949 | 0.1913 | 1.0109  | 0.395621 |
| <i>Asns</i>          | chr6:7675168-7693254      | 0.0705 | 0.1600 | 1.1838  | 0.104497 |
| <i>Ica1</i>          | chr6:8630526-8778488      | 0.1158 | 0.1697 | 0.5508  | 0.509511 |
| <i>2210408F21Rik</i> | chr6:31220350-31337404    | 0.0940 | 0.2030 | 1.1105  | 0.400537 |
| <i>Svopl</i>         | chr6:37983738-38046996    | 0.0656 | 0.1117 | 0.7695  | 0.267535 |
| <i>Gm15863</i>       | chr6:54635188-54643350    | 0.0759 | 0.1261 | 0.7311  | 0.408036 |
| <i>Igkv5-39</i>      | chr6:69900423-69900710    | 0.3531 | 0.8613 | 1.2865  | 0.459995 |
| <i>Igkj4</i>         | chr6:70723547-70723585    | 0.4295 | 7.1522 | 4.0575  | 0.166337 |
| <i>Pparg</i>         | chr6:115361220-115490401  | 0.0344 | 0.1718 | 2.3186  | 0.120015 |
| <i>Aicda</i>         | chr6:122553800-122564180  | 0.0256 | 0.1007 | 1.9751  | 0.271730 |
| <i>Rps4l</i>         | chr6:148354655-148355598  | 0.1694 | 0.5017 | 1.5662  | 0.220450 |
| <i>Cacng8</i>        | chr7:3390682-3415648      | 0.1127 | 0.2219 | 0.9776  | 0.225622 |
| <i>Sbk2</i>          | chr7:4956133-4964390      | 0.1432 | 0.1444 | 0.0127  | 0.988557 |
| <i>Dmwd</i>          | chr7:19076248-19082776    | 0.0830 | 0.2048 | 1.3023  | 0.085578 |
| <i>Megf8</i>         | chr7:25317163-25365917    | 0.0173 | 0.0362 | 1.0614  | 0.260756 |
| <i>Zfp30</i>         | chr7:29783997-29794702    | 0.0659 | 0.0995 | 0.5948  | 0.249447 |
| <i>Lrp3</i>          | chr7:35200026-35215370    | 0.0449 | 0.0648 | 0.5282  | 0.690594 |
| <i>Cldnd2</i>        | chr7:43440781-43443328    | 0.3678 | 0.5758 | 0.6465  | 0.249020 |
| <i>Klk1b27</i>       | chr7:44052289-44056705    | 0.0774 | 0.3774 | 2.2858  | 0.170419 |
| <i>Gm14377</i>       | chr7:47110850-47125990    | 0.1007 | 0.2255 | 1.1632  | 0.162555 |
| <i>Siglech</i>       | chr7:55768177-55778925    | 0.0902 | 0.2484 | 1.4609  | 0.322290 |
| <i>Gm17907</i>       | chr7:55902601-55903311    | 0.0751 | 0.5600 | 2.8976  | 0.226439 |
| <i>Gm23479</i>       | chr7:98935893-98936015    | 2.8290 | 3.8351 | 0.4390  | 0.185718 |
| <i>Gm6341</i>        | chr7:101154644-101155055  | 1.0195 | 1.6183 | 0.6666  | 0.098672 |
| <i>Gm24596</i>       | chr7:126563873-126563980  | 2.3540 | 3.6621 | 0.6376  | 0.458702 |
| <i>Zfp768</i>        | chr7:127342796-127345314  | 0.0935 | 0.1798 | 0.9433  | 0.264948 |
| <i>Zfp941</i>        | chr7:140807448-14082178   | 0.0154 | 0.0647 | 2.0752  | 0.225097 |
| <i>Odf3</i>          | chr7:140847804-140851018  | 0.1615 | 0.1681 | 0.0578  | 0.929976 |
| <i>Cend1</i>         | chr7:141426445-141429491  | 0.0772 | 0.1996 | 1.3705  | 0.223424 |
| <i>Ctxn1</i>         | chr8:4257647-4259274      | 0.4581 | 0.4001 | -0.1955 | 0.561381 |
| <i>Mcf2l</i>         | chr8:12873805-13020905    | 0.0337 | 0.0339 | 0.0057  | 0.987950 |

|               |                          |        |        |         |          |
|---------------|--------------------------|--------|--------|---------|----------|
| Ank1          | chr8:22974843-23150497   | 0.0247 | 0.0302 | 0.2891  | 0.660326 |
| Gm26887       | chr8:84192773-84197667   | 0.6063 | 0.5853 | -0.0508 | 0.947540 |
| Gpr56         | chr8:94977108-95014208   | 0.0708 | 0.1305 | 0.8831  | 0.057784 |
| Zfp612        | chr8:110079763-110090181 | 0.0973 | 0.2289 | 1.2341  | 0.015547 |
| Gm22060       | chr9:32446821-32446928   | 3.8846 | 5.3992 | 0.4750  | 0.243278 |
| Oaf           | chr9:43221277-43239816   | 0.1782 | 0.2196 | 0.3015  | 0.561577 |
| Pvrl1         | chr9:43744575-43807454   | 0.0373 | 0.1274 | 1.7713  | 0.006558 |
| Arhgap20os    | chr9:51832813-51875886   | 0.0721 | 0.1640 | 1.1858  | 0.028646 |
| Lrrc49        | chr9:60568858-60688158   | 0.0481 | 0.0586 | 0.2852  | 0.786823 |
| Dapk2         | chr9:66158222-66272242   | 0.0696 | 0.1020 | 0.5500  | 0.526173 |
| Irak1bp1      | chr9:82829805-82847688   | 0.1393 | 0.1418 | 0.0265  | 0.974517 |
| Plscr4        | chr9:92457377-92493510   | 0.0295 | 0.1259 | 2.0942  | 0.020349 |
| Esyt3         | chr9:99309966-99358530   | 0.0952 | 0.1618 | 0.7646  | 0.081752 |
| Lrrc2         | chr9:110951544-110984066 | 0.0518 | 0.1144 | 1.1418  | 0.105320 |
| Pomgnt2       | chr9:121981605-121996026 | 0.1125 | 0.1927 | 0.7760  | 0.230962 |
| Ccr3          | chr9:124021970-124031689 | 0.0734 | 0.0920 | 0.3246  | 0.716298 |
| Maoa          | chrX:16619697-16687818   | 0.1419 | 0.1249 | -0.1844 | 0.434636 |
| Gm7598        | chrX:38476460-38482486   | 0.1389 | 0.1661 | 0.2583  | 0.394083 |
| Gria3         | chrX:41400853-41678601   | 0.0372 | 0.0555 | 0.5786  | 0.455661 |
| Xlr3a         | chrX:73086292-73097095   | 0.0442 | 0.1761 | 1.9943  | 0.417266 |
| Dusp9         | chrX:73639418-73643514   | 0.0498 | 0.1114 | 1.1614  | 0.255584 |
| Gm15379       | chrX:75458811-75459459   | 0.1927 | 0.7783 | 2.0142  | 0.030770 |
| Cysltr1       | chrX:106574345-106603679 | 0.0716 | 0.1006 | 0.4906  | 0.330330 |
| Mid2          | chrX:140664598-140767715 | 0.0236 | 0.0442 | 0.9058  | 0.302649 |
| Gm15032       | chrX:142622491-142622902 | 0.6737 | 1.0012 | 0.5716  | 0.382775 |
| Mir98         | chrX:151913213-151913321 | 4.6403 | 3.2311 | -0.5222 | 0.351041 |
| Angpt1        | chr15:42424726-42676977  | 0.0399 | 0.0591 | 0.5654  | 0.618079 |
| Enpp2         | chr15:54838897-54920146  | 0.0653 | 0.1349 | 1.0459  | 0.066822 |
| Wisp1         | chr15:66891319-66923201  | 0.0564 | 0.1074 | 0.9291  | 0.305335 |
| Fam109b       | chr15:82338941-82345743  | 0.1357 | 0.1917 | 0.4988  | 0.255765 |
| 1810021B22Rik | chr15:89071195-89075852  | 0.3093 | 0.4322 | 0.4828  | 0.497618 |
| Gm3468        | chr14:6020653-6108665    | 0.0708 | 0.1481 | 1.0642  | 0.287411 |
| Lrrc3b        | chr14:15357518-15438987  | 0.1497 | 0.2445 | 0.7074  | 0.096526 |
| Ogdhl         | chr14:32322018-32347820  | 0.1263 | 0.1298 | 0.0392  | 0.893739 |
| Blk           | chr14:63372836-63417187  | 0.0976 | 0.1745 | 0.8381  | 0.378958 |
| Gm20667       | chr14:67673176-67675106  | 0.1252 | 0.2551 | 1.0267  | 0.140232 |
| Gm6984        | chr14:73953921-73955586  | 0.1376 | 0.2450 | 0.8321  | 0.227723 |
| Klf12         | chr14:99874485-100149764 | 0.0562 | 0.1872 | 1.7353  | 0.086261 |
| Flywch2       | chr17:23776915-23786081  | 0.3129 | 0.3955 | 0.3381  | 0.604014 |
| Syngr3        | chr17:24685091-24689955  | 0.0418 | 0.2019 | 2.2717  | 0.037704 |
| Rsph1         | chr17:31255018-31277356  | 0.2850 | 0.5464 | 0.9388  | 0.008139 |
| H2-M10.2      | chr17:36284226-36286490  | 0.3968 | 0.3061 | -0.3742 | 0.512186 |
| Ebi3          | chr17:55952622-55957021  | 0.2196 | 0.4963 | 1.1766  | 0.030609 |
| Fer           | chr17:63896017-64139494  | 0.0525 | 0.1594 | 1.6031  | 0.092294 |
| Pkdcc         | chr17:83215291-83225070  | 0.0763 | 0.2015 | 1.4000  | 0.281431 |
| Dync2li1      | chr17:84626495-84655558  | 0.3702 | 0.3299 | -0.1664 | 0.795564 |
| Ston1         | chr17:88597683-88662586  | 0.0538 | 0.1337 | 1.3130  | 0.014942 |
| Tnp2          | chr16:10787935-10788655  | 0.5368 | 0.8554 | 0.6722  | 0.151921 |
| Gm4279        | chr16:11688168-11691857  | 0.1433 | 0.2710 | 0.9191  | 0.096378 |
| NA            | chr16:20822102-20822677  | 0.3600 | 0.6916 | 0.9419  | 0.136094 |
| Itgb5         | chr16:33829664-33949153  | 0.0606 | 0.2036 | 1.7480  | 0.175075 |
| Bace2         | chr16:97356727-97439012  | 0.0379 | 0.0856 | 1.1768  | 0.411954 |
| Gal           | chr19:3409918-3414472    | 0.1849 | 0.5065 | 1.4541  | 0.150262 |
| Npas4         | chr19:4984354-4989971    | 0.0809 | 0.2236 | 1.4664  | 0.233812 |
| Gm6807        | chr19:45450307-45451195  | 0.3109 | 0.3000 | -0.0517 | 0.946843 |
| 4930552P12Rik | chr19:55640588-55702204  | 0.1438 | 0.2295 | 0.6748  | 0.151946 |
| Fam135a       | chr1:24010757-24100341   | 0.0189 | 0.0610 | 1.6862  | 0.062196 |
| NA            | chr1:34236595-34238820   | 0.1279 | 0.1129 | -0.1796 | 0.867809 |
| Gm16894       | chr1:40076227-40085853   | 0.2951 | 0.2978 | 0.0127  | 0.990731 |
| Fzd7          | chr1:59482146-59486947   | 0.0514 | 0.0674 | 0.3908  | 0.630486 |
| Espnl         | chr1:91322074-91348306   | 0.0699 | 0.0694 | -0.0108 | 0.984344 |
| Slc35f5       | chr1:125561015-125595684 | 0.0951 | 0.1826 | 0.9415  | 0.280539 |
| Gm26686       | chr1:128770598-128774421 | 0.0999 | 0.2041 | 1.0308  | 0.406280 |
| Fcrla         | chr1:170917575-170927583 | 0.0785 | 0.2542 | 1.6950  | 0.061692 |
| Mnda          | chr1:173896354-173912922 | 0.1384 | 0.2523 | 0.8661  | 0.286420 |
| Susd4         | chr1:182763859-182896598 | 0.0676 | 0.1513 | 1.1622  | 0.192204 |
| Cd34          | chr1:194938820-194961292 | 0.0001 | 0.0815 | 9.6708  | 0.189396 |
| Gm26742       | chr18:54981434-54987689  | 0.1195 | 0.1574 | 0.3974  | 0.235696 |
| Gm24875       | chr2:25031349-25031453   | 2.3033 | 5.2274 | 1.1824  | 0.001016 |
| Rnf208        | chr2:25242254-25244262   | 0.1364 | 0.3065 | 1.1676  | 0.036943 |
| Fam171b       | chr2:83812635-83883486   | 0.0303 | 0.0472 | 0.6396  | 0.507481 |

|                      |                          |        |        |         |          |
|----------------------|--------------------------|--------|--------|---------|----------|
| <i>Ltk</i>           | chr2:119751319-119760431 | 0.0286 | 0.0942 | 1.7225  | 0.173556 |
| <i>Gm14284</i>       | chr2:131322087-131322366 | 1.3715 | 1.7101 | 0.3183  | 0.426812 |
| <i>Gm21850</i>       | chr2:154052268-154058857 | 0.1548 | 0.5190 | 1.7451  | 0.302155 |
| <i>Cetn4</i>         | chr3:37307748-37312708   | 0.0300 | 0.1033 | 1.7846  | 0.117040 |
| <i>Gm8177</i>        | chr3:57135495-57136831   | 0.4054 | 0.3511 | -0.2072 | 0.470588 |
| <i>Glt28d2</i>       | chr3:85801046-85887518   | 0.0338 | 0.1099 | 1.7017  | 0.173349 |
| <i>Ankrd35</i>       | chr3:96670130-96691009   | 0.0333 | 0.1306 | 1.9727  | 0.022084 |
| <i>Syt6</i>          | chr3:103575230-103645567 | 0.0477 | 0.0908 | 0.9278  | 0.122482 |
| <i>Gm9857</i>        | chr3:108940052-108940445 | 0.5315 | 1.1943 | 1.1680  | 0.046125 |
| <i>Ntng1</i>         | chr3:109780039-110143228 | 0.0063 | 0.0396 | 2.6456  | 0.378511 |
| <i>Lpar3</i>         | chr3:146220960-146286214 | 0.0205 | 0.1640 | 3.0001  | 0.144349 |
| <i>Olfr157</i>       | chr4:43834751-43836517   | 0.1779 | 0.2512 | 0.4982  | 0.497418 |
| <i>Gm22300</i>       | chr4:56913641-56913767   | 3.1315 | 3.8415 | 0.2948  | 0.539614 |
| <i>Cdkn2b</i>        | chr4:89306288-89311032   | 0.3213 | 0.5453 | 0.7631  | 0.298474 |
| <i>Eqtn</i>          | chr4:94907266-94928843   | 0.1213 | 0.3818 | 1.6540  | 0.002275 |
| <i>Gm12796</i>       | chr4:101292413-101321745 | 1.2307 | 1.5258 | 0.3100  | 0.437129 |
| <i>Pdzk1ip1</i>      | chr4:115088707-115093899 | 0.0592 | 0.1505 | 1.3468  | 0.378823 |
| <i>Slc6a9</i>        | chr4:117834505-117875198 | 0.0408 | 0.0845 | 1.0499  | 0.036873 |
| <i>Ago4</i>          | chr4:126489540-126533472 | 0.0322 | 0.0779 | 1.2739  | 0.039637 |
| <i>5730409E04Rik</i> | chr4:126609817-126614371 | 0.0831 | 0.1215 | 0.5481  | 0.571939 |
| <i>Gm12978</i>       | chr4:131902789-131903311 | 0.7384 | 0.9850 | 0.4157  | 0.493554 |
| <i>Gm13142</i>       | chr4:147102326-147103981 | 0.2529 | 0.3014 | 0.2532  | 0.581715 |
| <i>Gm13054</i>       | chr4:148001090-148004014 | 0.2308 | 0.5446 | 1.2386  | 0.043369 |
| <i>Gpr153</i>        | chr4:152274231-152285337 | 0.0455 | 0.1213 | 1.4143  | 0.018187 |

Supplementary Table 8: Analysis of RNA-seq data from WT and cDKO Treg cells.

| Associated Gene Name | Coordinates Mus musculus Dec 2011 | cDKO Average FPKM | WT Average FPKM | WT / cDKO Log2 Fold Change | p-value  |
|----------------------|-----------------------------------|-------------------|-----------------|----------------------------|----------|
| Xist                 | chrX:103460374-103483217          | 0.1895            | 51.1288         | 8.0756                     | 0.002424 |
| Gm26992              | chrX:103422009-103481705          | 0.0001            | 32.2568         | 18.2992                    | 0.008093 |
| AW112010             | chr19:11047612-11050566           | 231.7947          | 427.0432        | 0.8815                     | 0.004021 |
| Ltf                  | chr9:111019291-111042766          | 0.0001            | 1.3978          | 13.7708                    | 0.155430 |
| Hsph1                | chr5:149614286-149636376          | 17.1130           | 9.1201          | -0.9080                    | 0.001297 |
| Gp49a                | chr10:51480631-51486316           | 2.3392            | 10.5743         | 2.1765                     | 0.012783 |
| Igfbp4               | chr11:99041243-99054392           | 18.9110           | 8.7668          | -1.1091                    | 0.010007 |
| Ccr2                 | chr9:124101949-124113557          | 24.5757           | 42.8884         | 0.8034                     | 0.000989 |
| Penk                 | chr4:4133530-4138819              | 19.1395           | 45.8271         | 1.2597                     | 0.002003 |
| Cables1              | chr18:11839219-11945627           | 0.0311            | 1.0377          | 5.0592                     | 0.017755 |
| Tsix                 | chrX:103431516-103484957          | 0.1189            | 16.8985         | 7.1504                     | 0.000305 |
| Lilrb4               | chr10:51480639-51496613           | 10.4871           | 24.7124         | 1.2366                     | 0.004443 |
| Ifi27l2a             | chr12:103442166-103443680         | 465.3704          | 924.7657        | 0.9907                     | 0.054160 |
| Bach2                | chr4:32238803-32586108            | 9.1386            | 5.1189          | -0.8361                    | 0.000912 |
| ErbB2                | chr11:98412469-98437716           | 0.0001            | 0.3846          | 11.9090                    | 0.004668 |
| Catsperd             | chr17:56628142-56664456           | 0.0167            | 1.0325          | 5.9459                     | 0.011737 |
| Srgn                 | chr10:62493832-62527451           | 226.6384          | 338.4009        | 0.5783                     | 0.003993 |
| Hmgcs1               | chr13:119690461-119708086         | 48.7645           | 27.4016         | -0.8316                    | 0.014181 |
| Hist1h4c             | chr13:23698059-23698454           | 166.2544          | 385.4438        | 1.2131                     | 0.035536 |
| Kdm6a                | chrX:18162574-18279936            | 18.1987           | 29.7032         | 0.7068                     | 0.003911 |
| Fyb                  | chr15:6579870-6663313             | 71.2518           | 46.0525         | -0.6296                    | 0.011110 |
| Ly6a                 | chr15:74994877-74997634           | 128.2987          | 244.2949        | 0.9291                     | 0.028388 |
| Dnah8                | chr17:30624353-30875264           | 24.6629           | 13.4697         | -0.8726                    | 0.031072 |
| Hist1h4k             | chr13:21750193-21750505           | 165.8353          | 358.1746        | 1.1109                     | 0.036665 |
| Hist2h2bb            | chr3:96269720-96279001            | 97.2127           | 159.8899        | 0.7179                     | 0.018836 |
| Klrg1                | chr6:122270595-122282882          | 31.1316           | 68.2848         | 1.1332                     | 0.076124 |
| Scppdh               | chr1:179668209-179687189          | 3.0615            | 6.8717          | 1.1664                     | 0.018446 |
| Igj                  | chr5:88520511-88527891            | 0.0001            | 1.2488          | 13.6082                    | 0.083384 |
| Gm5134               | chr10:75954513-76009591           | 0.0001            | 0.5335          | 12.3814                    | 0.006389 |
| S100a10              | chr3:93555079-93564643            | 293.3537          | 442.4100        | 0.5927                     | 0.010220 |
| Gm5127               | chrX:106583185-106710557          | 0.0100            | 0.8494          | 6.4037                     | 0.000818 |
| Fgl2                 | chr5:21372641-21378374            | 25.1378           | 42.4837         | 0.7571                     | 0.008732 |
| Mdn1                 | chr4:32657118-32775217            | 36.7591           | 24.5447         | -0.5827                    | 0.020838 |
| Hist1h1d             | chr13:23555031-23558852           | 56.1107           | 95.4714         | 0.7668                     | 0.038629 |
| Gm23245              | chr5:129789538-129789673          | 0.0001            | 12.8612         | 16.9727                    | 0.098272 |
| Lgals3               | chr14:47367750-47386160           | 7.4626            | 15.9816         | 1.0987                     | 0.010433 |
| Glrx                 | chr13:75839867-75850151           | 29.7399           | 50.8097         | 0.7727                     | 0.001590 |
| Lpin3                | chr2:160880669-160906002          | 0.0478            | 0.7497          | 3.9721                     | 0.000640 |
| Smpdl3a              | chr10:57794334-57811830           | 83.0517           | 124.5902        | 0.5851                     | 0.003907 |
| S100a6               | chr3:90612893-90614414            | 133.5733          | 248.6789        | 0.8967                     | 0.026530 |
| Gzma                 | chr13:113093824-113100979         | 0.2190            | 4.1469          | 4.2432                     | 0.018123 |
| Mir5107              | chr18:60812075-60812163           | 2.1839            | 39.0940         | 4.1620                     | 0.001690 |
| Oasl2                | chr5:114896935-114912234          | 1.5065            | 4.3848          | 1.5413                     | 0.013011 |
| Anxa7                | chr14:20455260-20480133           | 20.8299           | 32.3098         | 0.6333                     | 0.000478 |
| Disc1                | chr8:125054194-125261858          | 0.0001            | 0.4060          | 11.9872                    | 0.037986 |
| Gm15800              | chr5:121220218-121368577          | 9.9297            | 5.9398          | -0.7413                    | 0.026305 |
| Hist1h4f             | chr13:23551257-23551648           | 74.5134           | 167.8860        | 1.1719                     | 0.038744 |
| Slc24a1              | chr9:64922860-64951607            | 0.0165            | 0.4435          | 4.7497                     | 0.003645 |
| Hist1h1a             | chr13:23763667-23764414           | 146.9578          | 249.8960        | 0.7659                     | 0.022552 |
| Dapk1                | chr13:60601946-60763185           | 3.5745            | 1.2997          | -1.4595                    | 0.038712 |
| Gpr15                | chr16:58717434-58718724           | 11.7701           | 25.2456         | 1.1009                     | 0.008370 |
| Fam160a1             | chr3:85660060-85746266            | 2.3591            | 5.8718          | 1.3155                     | 0.011782 |
| Casp1                | chr9:5298516-5307265              | 43.0224           | 68.2816         | 0.6664                     | 0.003190 |
| Wsb2-ps              | chr11:62749851-62752787           | 0.0219            | 0.7182          | 5.0343                     | 0.007661 |
| Adk                  | chr14:21052573-21448568           | 30.7444           | 47.1581         | 0.6172                     | 0.000404 |
| Kpna7                | chr5:144983518-145084030          | 0.0001            | 0.4863          | 12.2477                    | 0.056692 |
| Utp20                | chr10:88746606-88826814           | 27.9159           | 18.8931         | -0.5632                    | 0.015143 |
| Slc15a2              | chr16:36750177-36784962           | 16.9408           | 9.5173          | -0.8319                    | 0.016253 |
| Lgals1               | chr15:78926724-78930465           | 328.6194          | 511.7272        | 0.6390                     | 0.038674 |
| Hist1h3e             | chr13:23561533-23562369           | 86.4929           | 168.7812        | 0.9645                     | 0.102161 |
| NA                   | chr13:23544051-23545055           | 94.2101           | 171.5001        | 0.8643                     | 0.065971 |
| Lyz2                 | chr10:117277333-117282274         | 1.1066            | 6.4369          | 2.5403                     | 0.113042 |
| Igkc                 | chr6:70726434-70726757            | 4.7678            | 24.2784         | 2.3483                     | 0.067390 |
| 5430427O19Rik        | chrX:85870353-85891499            | 0.2614            | 1.4434          | 2.4651                     | 0.027991 |
| Arid1a               | chr4:133679007-133756769          | 18.3558           | 11.4745         | -0.6778                    | 0.045508 |
| Gm11223              | chr4:69925200-69926171            | 1.5864            | 6.2208          | 1.9714                     | 0.000056 |
| Naip2                | chr13:100144062-100202092         | 5.6745            | 10.3412         | 0.8658                     | 0.005074 |
| Dmd                  | chrX:82948869-85206141            | 0.0001            | 0.0563          | 9.1371                     | 0.023824 |
| Gm20628              | chr3:96267074-96270289            | 69.0527           | 107.9017        | 0.6439                     | 0.040036 |

|               |                           |           |          |         |          |
|---------------|---------------------------|-----------|----------|---------|----------|
| Asb2          | chr12:103321141-103356001 | 12.6695   | 22.2376  | 0.8116  | 0.020205 |
| 6030445D17Rik | chr4:136462249-136463977  | 0.0248    | 1.0393   | 5.3883  | 0.052394 |
| Cdca3         | chr6:124829546-124833701  | 9.0466    | 16.2880  | 0.8484  | 0.014676 |
| Adcy6         | chr15:98589993-98607633   | 6.3863    | 3.6964   | -0.7889 | 0.000684 |
| Aurka         | chrX:172356189-172370535  | 5.3357    | 10.7721  | 1.0136  | 0.006045 |
| Cybb          | chrX:9435251-9487771      | 9.0696    | 14.7616  | 0.7027  | 0.009089 |
| H2afx         | chr9:44334714-44336071    | 38.6176   | 71.8056  | 0.8948  | 0.065275 |
| Rel1          | chr5:63908895-63968905    | 1.7102    | 3.9685   | 1.2144  | 0.002997 |
| 2210408121Rik | chr13:77135539-77613291   | 0.1254    | 0.9846   | 2.9733  | 0.008337 |
| H1f0          | chr15:79028211-79030498   | 27.7706   | 43.9262  | 0.6615  | 0.025056 |
| Tstd3         | chr4:21757381-21767212    | 6.1233    | 12.8597  | 1.0705  | 0.000938 |
| Fam227a       | chr15:79609575-79658956   | 0.0066    | 0.2596   | 5.2965  | 0.054597 |
| Batf          | chr12:85686668-85709087   | 87.2349   | 133.3305 | 0.6120  | 0.008850 |
| S100a4        | chr3:90603769-90606045    | 223.2922  | 345.4849 | 0.6297  | 0.030984 |
| Lphn1         | chr8:83900104-83941954    | 12.9227   | 7.8931   | -0.7112 | 0.029836 |
| Gm15523       | chr12:103336905-103348057 | 0.0001    | 2.9051   | 14.8263 | 0.036938 |
| Pglyrp1       | chr7:18884689-18890438    | 7.9761    | 23.4571  | 1.5563  | 0.038661 |
| Rab19         | chr6:39381174-39390380    | 15.4772   | 25.8187  | 0.7383  | 0.000458 |
| Cdk1          | chr10:69336634-69352938   | 7.5238    | 13.3100  | 0.8230  | 0.015907 |
| Hmmr          | chr11:40701394-40733422   | 5.5632    | 9.5240   | 0.7756  | 0.009699 |
| Foxp1         | chr6:98925337-99522721    | 24.6803   | 18.4472  | -0.4200 | 0.007698 |
| Aim2          | chr1:173350878-173466040  | 17.7125   | 26.8860  | 0.6021  | 0.004824 |
| Cd300a        | chr11:114890040-114904654 | 0.0001    | 0.3474   | 11.7624 | 0.302059 |
| Il10          | chr1:131019844-131024974  | 9.4560    | 22.0602  | 1.2221  | 0.016352 |
| Larp1         | chr11:58009063-58062034   | 32.8283   | 23.8255  | -0.4624 | 0.013059 |
| St8sia1       | chr6:142821544-142964452  | 6.5556    | 4.1282   | -0.6672 | 0.005821 |
| Tmem205       | chr9:21921009-21927535    | 0.0001    | 1.7472   | 14.0927 | 0.047487 |
| Satb1         | chr17:51736186-51833290   | 30.2678   | 21.8099  | -0.4728 | 0.033721 |
| Gm20696       | chr6:99257483-99666797    | 10.8299   | 6.0908   | -0.8303 | 0.006707 |
| Pld4          | chr12:112760654-112768986 | 0.0001    | 0.6018   | 12.5552 | 0.014833 |
| Zfp652        | chr11:95712672-95835115   | 8.2009    | 5.8516   | -0.4870 | 0.004274 |
| Polr1a        | chr6:71909052-71979356    | 28.6634   | 20.8001  | -0.4626 | 0.010335 |
| Gm27006       | chr8:79705596-79706539    | 9.1758    | 2.6266   | -1.8046 | 0.035068 |
| Utp14b        | chr1:78658037-78667588    | 5.9187    | 2.6068   | -1.1830 | 0.009559 |
| Hist1h1c      | chr13:23738806-23740366   | 196.2095  | 300.1455 | 0.6133  | 0.064757 |
| Snx2          | chr18:53176364-53220860   | 51.2008   | 71.8547  | 0.4889  | 0.002181 |
| Hist2h2ac     | chr3:96220360-96220880    | 95.5978   | 162.7868 | 0.7679  | 0.065322 |
| Atp6v0d2      | chr4:19876840-19922605    | 4.1122    | 8.2252   | 1.0001  | 0.007428 |
| Dnal1         | chr12:84114365-84147498   | 0.0155    | 0.2971   | 4.2619  | 0.002181 |
| Gm11460       | chr2:165666496-165666857  | 4.1065    | 0.0367   | -6.8059 | 0.056020 |
| Fasn          | chr11:120805939-120824178 | 36.4151   | 26.4510  | -0.4612 | 0.027790 |
| Hist1h4d      | chr13:23581597-23581990   | 455.8031  | 752.4859 | 0.7233  | 0.082165 |
| Dnase1l2      | chr17:24440080-24443105   | 6.5078    | 2.6361   | -1.3037 | 0.026004 |
| Id2           | chr12:25093800-25096092   | 33.8093   | 58.7395  | 0.7969  | 0.030829 |
| NA            | chr13:23535421-23535951   | 66.6870   | 127.6543 | 0.9368  | 0.070486 |
| Yam1          | chr17:39846957-39848788   | 1809.8114 | 705.2798 | -1.3596 | 0.014541 |
| Fbxo6         | chr4:148145715-148152140  | 8.4984    | 14.5654  | 0.7773  | 0.000657 |
| Gm26598       | chr1:136622097-136624650  | 0.0001    | 0.4588   | 12.1635 | 0.014338 |
| Nfam1         | chr15:82997720-83033306   | 0.0001    | 0.3855   | 11.9125 | 0.053624 |
| Gm22806       | chr13:51648198-51648334   | 0.0001    | 9.8764   | 16.5917 | 0.205135 |
| Marveld1      | chr19:42147399-42151695   | 6.1130    | 10.7887  | 0.8196  | 0.007885 |
| Marveld2      | chr13:100595956-100616971 | 1.2820    | 3.3403   | 1.3816  | 0.002936 |
| Dtnbp1        | chr13:44922078-45002096   | 10.5404   | 19.0103  | 0.8508  | 0.000668 |
| Kbtbd11       | chr8:15011024-15033330    | 125.3669  | 99.3420  | -0.3357 | 0.002241 |
| Ldlr          | chr9:21723575-21749916    | 18.4350   | 12.0349  | -0.6152 | 0.030988 |
| Gm22596       | chr2:164761658-164761974  | 0.2028    | 5.2046   | 4.6816  | 0.005709 |
| Magee2        | chrX:104854954-104857267  | 0.0001    | 0.4634   | 12.1781 | 0.003266 |
| Jmy           | chr13:93430096-93499808   | 5.4996    | 3.4557   | -0.6703 | 0.010582 |
| Adam23        | chr1:63445890-63596515    | 0.0001    | 0.1181   | 10.2058 | 0.177880 |
| Myc           | chr15:61985390-61990374   | 33.6817   | 23.2691  | -0.5335 | 0.012124 |
| Serpina9      | chr12:103994742-104013755 | 0.0630    | 0.7104   | 3.4946  | 0.064494 |
| Gpr68         | chr12:100876681-100908198 | 30.1875   | 47.0627  | 0.6406  | 0.031968 |
| Hist4h4       | chr6:136801552-136804431  | 21.1860   | 37.6634  | 0.8301  | 0.065040 |
| Commdb6       | chr14:101633765-101640686 | 10.3980   | 19.0075  | 0.8703  | 0.006458 |
| Map2          | chr1:66175272-66442583    | 0.2581    | 0.8103   | 1.6506  | 0.042249 |
| Cd83          | chr13:43785106-43803130   | 47.9130   | 71.6005  | 0.5796  | 0.037358 |
| Tnfrsf8       | chr4:145267136-145315164  | 6.1381    | 10.9112  | 0.8300  | 0.015239 |
| Clic4         | chr4:135213968-135272814  | 3.5163    | 6.2454   | 0.8287  | 0.029776 |
| Rcn3          | chr7:45082912-45092221    | 0.1332    | 1.7250   | 3.6947  | 0.002289 |
| Repin1        | chr6:48593882-48599082    | 0.9746    | 2.4988   | 1.3584  | 0.002542 |
| Gzmb          | chr14:56258855-56262260   | 37.2908   | 62.6897  | 0.7494  | 0.039781 |

|               |                           |          |          |         |          |
|---------------|---------------------------|----------|----------|---------|----------|
| Hist1h2bm     | chr13:21722097-21722478   | 64.5428  | 120.6542 | 0.9025  | 0.072269 |
| Gm22677       | chr2:10465759-10465867    | 14.0862  | 0.2555   | -5.7850 | 0.037376 |
| Srp54b        | chr12:55155103-55189213   | 0.0640   | 0.6978   | 3.4476  | 0.009578 |
| Hist1h4h      | chr13:23531043-23531519   | 233.8517 | 395.7618 | 0.7590  | 0.075928 |
| Wdr59         | chr8:111448783-111522107  | 7.3172   | 4.5208   | -0.6947 | 0.006099 |
| Eif3j1        | chr2:122028545-122056598  | 4.1184   | 2.1301   | -0.9512 | 0.022014 |
| Gm26521       | chr9:20607765-20612485    | 0.0965   | 1.2723   | 3.7207  | 0.020464 |
| Hist1h2bb     | chr13:23746733-23747202   | 183.2809 | 292.6210 | 0.6750  | 0.049782 |
| Drc1          | chr5:30281387-30366708    | 4.7310   | 2.0076   | -1.2367 | 0.009000 |
| Lipo1         | chr19:33517739-33761951   | 1.0708   | 3.4275   | 1.6784  | 0.020433 |
| Prrc2c        | chr1:162670724-162740556  | 46.5956  | 33.9877  | -0.4552 | 0.056828 |
| Cpe           | chr8:64592557-64693040    | 0.0001   | 0.7718   | 12.9139 | 0.073238 |
| Hint2         | chr4:43654226-43656466    | 2.1942   | 6.1982   | 1.4982  | 0.002039 |
| Scd4          | chr19:44333091-44346743   | 0.0001   | 0.2754   | 11.4274 | 0.008447 |
| Hist1h3c      | chr13:23744972-23745602   | 22.6562  | 48.2854  | 1.0917  | 0.079441 |
| 5530601H04Rik | chrX:105037196-105079609  | 1.9812   | 3.7554   | 0.9226  | 0.006349 |
| Cd40          | chr2:165055626-165072948  | 0.0001   | 0.3264   | 11.6725 | 0.052499 |
| Ovgp1         | chr3:105973710-105987423  | 3.6657   | 1.6553   | -1.1470 | 0.003604 |
| Lctl          | chr9:64117146-64138118    | 0.0790   | 0.8588   | 3.4421  | 0.003515 |
| Adcy4         | chr14:55769057-55784042   | 0.0001   | 0.2960   | 11.5315 | 0.017161 |
| Pisd-ps2      | chr17:3076577-3084183     | 6.9189   | 12.0495  | 0.8004  | 0.001937 |
| Hist1h4j      | chr13:21735061-21735837   | 34.7860  | 66.3162  | 0.9309  | 0.082550 |
| Crebl2        | chr6:134830153-134858931  | 9.8672   | 14.8855  | 0.5932  | 0.004659 |
| Als2cl        | chr9:110879869-110900530  | 29.4484  | 18.9831  | -0.6335 | 0.083693 |
| Sord          | chr2:122234748-122265340  | 0.6683   | 2.3863   | 1.8361  | 0.002583 |
| NA            | chr5:143548705-143564525  | 9.7499   | 5.2548   | -0.8918 | 0.008001 |
| Sostdc1       | chr12:36314168-36318452   | 0.3512   | 3.1455   | 3.1628  | 0.105740 |
| D630036H23Rik | chr12:36381241-36382181   | 0.0001   | 1.1015   | 13.4272 | 0.035681 |
| Ocln          | chr13:100496506-100552718 | 0.0425   | 0.5149   | 3.5994  | 0.051923 |
| Rilpl2        | chr5:124463264-124478366  | 37.0314  | 56.6459  | 0.6132  | 0.026045 |
| Ehd1          | chr19:6276724-6300096     | 7.5600   | 12.1619  | 0.6859  | 0.009595 |
| Gpr55         | chr1:85939536-85961055    | 5.8969   | 11.2425  | 0.9309  | 0.023554 |
| Ube2l6        | chr2:84798827-84810335    | 4.1274   | 9.3933   | 1.1864  | 0.009121 |
| S100a3        | chr3:90600214-90602702    | 0.0001   | 1.4089   | 13.7822 | 0.015974 |
| Cpd           | chr11:76778423-76847018   | 3.6684   | 6.9529   | 0.9225  | 0.046124 |
| Tcf19         | chr17:35512733-35516824   | 16.0271  | 26.4378  | 0.7221  | 0.017746 |
| Ctla4         | chr1:60886999-60915832    | 187.6028 | 253.3834 | 0.4336  | 0.018937 |
| Galnt3        | chr2:66082765-66124994    | 0.0592   | 0.5894   | 3.3158  | 0.083399 |
| Dok1          | chr6:83030933-83033471    | 15.9619  | 25.2052  | 0.6591  | 0.008662 |
| Ikzf1         | chr11:11685002-11772926   | 77.3060  | 60.0551  | -0.3643 | 0.019817 |
| Snora65       | chr2:32963290-32963420    | 126.6334 | 52.6188  | -1.2670 | 0.058571 |
| Slc7a10       | chr7:35186384-35204898    | 2.2887   | 5.3070   | 1.2134  | 0.003507 |
| Gm26899       | chr2:120532903-120539846  | 28.1294  | 19.9097  | -0.4986 | 0.009473 |
| 2810417H13Rik | chr9:65890236-65903266    | 10.0800  | 15.4215  | 0.6135  | 0.014669 |
| Galk2         | chr2:125859108-125984299  | 5.9132   | 9.0094   | 0.6075  | 0.003671 |
| mt-Tc         | chrM:5191-5257            | 290.2400 | 565.4569 | 0.9622  | 0.042161 |
| Plekhh3       | chr11:101162678-101171351 | 0.0061   | 0.3351   | 5.7890  | 0.072015 |
| BC100451      | chr11:118332359-118342500 | 0.1899   | 1.7612   | 3.2136  | 0.037381 |
| Plscr4        | chr9:92457377-92493510    | 0.0047   | 0.2540   | 5.7549  | 0.051421 |
| Exog          | chr9:119444922-119465517  | 5.0747   | 2.4917   | -1.0262 | 0.046281 |
| Acsbg1        | chr9:54604876-54661870    | 14.7253  | 24.7119  | 0.7469  | 0.045461 |
| Nid2          | chr14:19751256-19811787   | 1.1806   | 2.7444   | 1.2170  | 0.024293 |
| 4930506M07Rik | chr19:58973357-59076069   | 0.7667   | 2.4251   | 1.6613  | 0.100150 |
| Ttc16         | chr2:32757025-32775633    | 0.7165   | 1.6815   | 1.2306  | 0.000585 |
| Hist3h2a      | chr11:58954684-58956674   | 31.0646  | 50.0437  | 0.6879  | 0.079901 |
| H3f3b         | chr11:116021911-116027962 | 64.8327  | 93.1171  | 0.5223  | 0.050480 |
| Mvp           | chr7:126986859-127014621  | 19.2717  | 28.6748  | 0.5733  | 0.023293 |
| Gtf3c4        | chr2:28822298-28840360    | 10.3755  | 7.3542   | -0.4965 | 0.006977 |
| Top2a         | chr11:98992942-99024189   | 48.0869  | 68.5636  | 0.5118  | 0.086191 |
| Gm9085        | chrX:20382749-20383821    | 0.0001   | 0.9298   | 13.1826 | 0.072322 |
| Pgpep1        | chr8:70646435-70659738    | 0.3666   | 1.4085   | 1.9418  | 0.028559 |
| Trim17        | chr11:58954684-58973098   | 17.9168  | 27.7647  | 0.6319  | 0.073285 |
| Ak5           | chr3:152462814-152668140  | 1.3551   | 0.2932   | -2.2087 | 0.017784 |
| Gm14455       | chr2:172425803-172440560  | 1.0231   | 3.2088   | 1.6491  | 0.025731 |
| Slc38a2       | chr15:96687393-96699698   | 41.3414  | 31.2386  | -0.4043 | 0.008799 |
| Cd3eap        | chr7:19356848-19359483    | 17.5707  | 9.6462   | -0.8651 | 0.027782 |
| Zdhhc2        | chr8:40423814-40510268    | 7.8127   | 12.8305  | 0.7157  | 0.034317 |
| Gm26064       | chr13:43425741-43425850   | 23.1858  | 3.2766   | -2.8230 | 0.000037 |
| Gpr83         | chr9:14860209-14870789    | 31.8096  | 22.9402  | -0.4716 | 0.022093 |
| Gm15831       | chr5:77116809-77122348    | 0.0001   | 2.0349   | 14.3127 | 0.151904 |
| Serpinb6a     | chr13:33917917-34002794   | 5.5702   | 8.8939   | 0.6751  | 0.006237 |

|               |                           |          |          |         |          |
|---------------|---------------------------|----------|----------|---------|----------|
| Nap1i3        | chrX:122394564-122397385  | 0.0001   | 0.3795   | 11.8899 | 0.142832 |
| Tspan31       | chr10:127067316-127070261 | 19.7553  | 30.7306  | 0.6374  | 0.005513 |
| Tbx21         | chr11:97098070-97115331   | 6.5344   | 11.2654  | 0.7858  | 0.010158 |
| Galnt7        | chr8:57523827-57653032    | 14.0543  | 9.8612   | -0.5112 | 0.006326 |
| Bhlhe40       | chr6:108660628-108666925  | 11.9306  | 20.9089  | 0.8095  | 0.105688 |
| Cst7          | chr2:150570414-150578944  | 78.4398  | 118.9179 | 0.6003  | 0.068898 |
| Chn1          | chr2:73610659-73775346    | 0.0303   | 0.3878   | 3.6785  | 0.040187 |
| Junb          | chr8:84976908-84978748    | 110.7719 | 173.2165 | 0.6450  | 0.124319 |
| Atp11b        | chr3:35754133-35856274    | 39.6045  | 30.4188  | -0.3807 | 0.013583 |
| Hist1h2bn     | chr13:21754122-21754503   | 9.8030   | 26.1693  | 1.4166  | 0.072927 |
| Tspan3        | chr9:56135884-56161070    | 15.4371  | 24.2922  | 0.6541  | 0.003525 |
| Srfbp1        | chr18:52465692-52490738   | 38.9123  | 24.8290  | -0.6482 | 0.029610 |
| Serinc3       | chr2:163623271-163645131  | 174.1860 | 223.7840 | 0.3615  | 0.013565 |
| 1500015010Rik | chr1:43730601-43742578    | 0.0001   | 1.1635   | 13.5062 | 0.154999 |
| Hist1h2be     | chr13:23583741-23621124   | 4.9664   | 9.0638   | 0.8679  | 0.033793 |
| Hist1h1b      | chr13:21779882-21780625   | 185.2163 | 264.5684 | 0.5144  | 0.063525 |
| Plxna1        | chr6:89316315-89362613    | 1.6253   | 0.7448   | -1.1258 | 0.022961 |
| Trap1         | chr16:4039970-4077827     | 65.5306  | 50.3078  | -0.3814 | 0.009453 |
| Nusap1        | chr2:119618297-119651244  | 14.0836  | 20.9598  | 0.5736  | 0.029739 |
| Glipr2        | chr4:43957400-43979118    | 44.3530  | 61.9752  | 0.4827  | 0.011435 |
| Ptplad1       | chr9:64986984-65021717    | 80.7429  | 106.2250 | 0.3957  | 0.011318 |
| Arrdc3        | chr13:80883383-80896035   | 9.9104   | 14.8007  | 0.5786  | 0.035340 |
| Pprc1         | chr19:46044885-46072915   | 7.8500   | 5.2767   | -0.5731 | 0.016913 |
| Cad           | chr5:31054779-31078479    | 18.8701  | 13.5667  | -0.4760 | 0.043383 |
| Ago2          | chr15:73098591-73184840   | 15.2355  | 10.4357  | -0.5459 | 0.067538 |
| 6430531B16Rik | chr7:139972302-139978755  | 0.0333   | 0.7634   | 4.5170  | 0.057540 |
| Arhgap33      | chr7:30522225-30534180    | 0.0250   | 0.3915   | 3.9666  | 0.000363 |
| Apbb1         | chr7:105558485-105574402  | 0.9122   | 2.5791   | 1.4994  | 0.006193 |
| C1qtnf5       | chr9:44107244-44109187    | 2.9565   | 0.3034   | -3.2845 | 0.067142 |
| Gprasp2       | chrX:135839033-135844730  | 0.6913   | 1.9587   | 1.5025  | 0.096778 |
| Mastl         | chr2:23115605-23156024    | 2.2902   | 4.2664   | 0.8975  | 0.040366 |
| Gm20407       | chr19:27994196-27995693   | 2.8415   | 0.2060   | -3.7860 | 0.000657 |
| Kif11         | chr19:37376402-37421859   | 25.8279  | 37.2228  | 0.5273  | 0.049202 |
| Mroh2a        | chr1:88226985-88262289    | 0.8292   | 1.8501   | 1.1578  | 0.023636 |
| Tspear        | chr10:77829466-77887021   | 0.0104   | 0.4358   | 5.3869  | 0.042004 |
| Trrap         | chr5:144768091-144859778  | 18.9617  | 14.0656  | -0.4309 | 0.058590 |
| Ahr           | chr12:35497973-35535038   | 5.1707   | 7.9822   | 0.6264  | 0.017591 |
| Phrf1         | chr7:141228783-141262750  | 24.5396  | 18.4732  | -0.4097 | 0.022507 |
| Ndc80         | chr17:71496099-71526857   | 10.2251  | 17.1876  | 0.7493  | 0.026051 |
| Ttbk1         | chr17:46442447-46487675   | 0.4653   | 1.2991   | 1.4812  | 0.056817 |
| Mphosph9      | chr5:124250958-124327972  | 9.2878   | 6.6161   | -0.4893 | 0.015296 |
| Pon2          | chr6:5264146-5298455      | 13.8234  | 19.5778  | 0.5021  | 0.010996 |
| Vamp1         | chr6:125215550-125244543  | 13.5570  | 9.4155   | -0.5259 | 0.058798 |
| Cenpt         | chr8:105844677-105852008  | 15.5955  | 8.8936   | -0.8103 | 0.039555 |
| Chd8          | chr14:52198150-52237791   | 24.7425  | 19.9018  | -0.3141 | 0.003354 |
| Trem1         | chr17:48300037-48312534   | 22.8891  | 16.6581  | -0.4584 | 0.013065 |
| Olf172        | chr16:58760151-58761240   | 2.0494   | 0.2694   | -2.9276 | 0.027263 |
| Ccdc86        | chr19:10941480-10949266   | 8.0006   | 4.3883   | -0.8664 | 0.014389 |
| Patl2         | chr2:122120107-122186189  | 0.1772   | 1.2479   | 2.8163  | 0.057382 |
| Gm15673       | chr7:101238340-101239278  | 0.0974   | 1.6018   | 4.0391  | 0.113792 |
| Bcl2a1b       | chr9:89199208-89207827    | 21.6551  | 40.3610  | 0.8983  | 0.102489 |
| Esco2         | chr14:65819037-65833994   | 5.2240   | 9.0949   | 0.7999  | 0.037810 |
| Tg            | chr15:66670752-66850721   | 0.5707   | 1.2425   | 1.1225  | 0.007433 |
| Casp3         | chr8:46617448-46638706    | 59.0331  | 83.0440  | 0.4924  | 0.019510 |
| Hist1h2bg     | chr13:23571395-23572013   | 59.2633  | 110.2172 | 0.8951  | 0.166812 |
| Sh3bgrl       | chrX:109095364-109197873  | 33.2305  | 46.7137  | 0.4913  | 0.025301 |
| Ccnd2         | chr6:127125778-127151048  | 90.8399  | 73.6315  | -0.3030 | 0.002998 |
| Phf12         | chr11:77982753-78030539   | 21.4023  | 14.9384  | -0.5187 | 0.055120 |
| Kmt2a         | chr9:44803354-44881296    | 19.2510  | 12.7802  | -0.5910 | 0.162989 |
| Gm9522        | chr15:39180510-39181441   | 9.8723   | 3.4408   | -1.5206 | 0.007778 |
| Daam1         | chr12:71831077-71992367   | 3.7504   | 1.9821   | -0.9200 | 0.066458 |
| Hist1h1e      | chr13:23621754-23622502   | 319.0096 | 443.0949 | 0.4740  | 0.074304 |
| Prkra         | chr2:76629897-76648015    | 2.1270   | 5.3215   | 1.3230  | 0.008399 |
| Ralgapa2      | chr2:146239878-146512026  | 7.1534   | 5.4277   | -0.3983 | 0.007347 |
| Prss16        | chr13:22002175-22009742   | 0.0787   | 0.9838   | 3.6434  | 0.073351 |
| Camkk2        | chr5:122731172-122779410  | 9.2601   | 6.1927   | -0.5805 | 0.014186 |
| Smarcc1       | chr9:110132036-110240178  | 23.2975  | 17.9110  | -0.3793 | 0.011696 |
| Rnf43         | chr11:87662721-87735539   | 4.2442   | 7.5752   | 0.8358  | 0.041778 |
| Gm10644       | chr8:83932328-83955205    | 8.8953   | 4.5638   | -0.9628 | 0.015396 |
| Il6st         | chr13:112475007-112506860 | 92.6683  | 74.8860  | -0.3074 | 0.012124 |
| Socs4         | chr14:47276930-47296098   | 13.0840  | 9.4300   | -0.4725 | 0.019953 |

|               |                           |          |          |         |          |
|---------------|---------------------------|----------|----------|---------|----------|
| Hist1h2af     | chr13:23533905-23534304   | 20.8035  | 44.7665  | 1.1056  | 0.081307 |
| Arl6ip1       | chr7:118118890-118129625  | 121.5120 | 156.0542 | 0.3609  | 0.006412 |
| Hif1a         | chr12:73901374-73947530   | 105.2461 | 130.2847 | 0.3079  | 0.003134 |
| Dnase2a       | chr8:84908559-84922915    | 3.3343   | 5.3529   | 0.6829  | 0.005302 |
| Slc25a29      | chr12:108825872-108835883 | 3.0692   | 1.3080   | -1.2305 | 0.000189 |
| Gnptg         | chr17:25233330-25240124   | 13.0689  | 20.4960  | 0.6492  | 0.014952 |
| Icos          | chr1:60977926-61000320    | 82.5072  | 113.7338 | 0.4631  | 0.071380 |
| Ptafr         | chr4:132564066-132582683  | 0.5089   | 1.9539   | 1.9410  | 0.010697 |
| Mfhas1        | chr8:35587797-35679449    | 10.4263  | 7.4964   | -0.4760 | 0.011693 |
| Tmem201       | chr4:149715374-149738044  | 4.3769   | 2.8626   | -0.6126 | 0.014646 |
| Dnmt3a        | chr12:3806006-3914443     | 13.6382  | 10.8487  | -0.3301 | 0.005460 |
| Gpr111        | chr17:42708935-42742179   | 0.4136   | 0.0043   | -6.5881 | 0.080367 |
| Hist1h2ak     | chr13:21753394-21753907   | 175.2176 | 287.9207 | 0.7165  | 0.166896 |
| Arrdc4        | chr7:68737044-68749241    | 1.4228   | 3.4545   | 1.2797  | 0.037236 |
| Fam81a        | chr9:70089309-70142560    | 0.6863   | 1.9558   | 1.5108  | 0.026467 |
| Samsn1        | chr16:75858792-76022270   | 33.6203  | 45.5754  | 0.4389  | 0.041920 |
| Tmem50b       | chr16:91574502-91597800   | 17.3173  | 11.1050  | -0.6410 | 0.027965 |
| Col11a2       | chr17:34039436-34066685   | 2.8850   | 1.3799   | -1.0640 | 0.051491 |
| Cdyl2         | chr8:116568723-116732991  | 6.6327   | 4.6624   | -0.5085 | 0.006671 |
| NA            | chr3:142594846-142619179  | 2.5121   | 5.4211   | 1.1097  | 0.021825 |
| Gm26735       | chr13:28943047-28951671   | 11.9660  | 7.1371   | -0.7455 | 0.039518 |
| Bcl2l1        | chr2:128126037-128162547  | 10.0633  | 7.1878   | -0.4855 | 0.011885 |
| Mcoln3        | chr3:146117458-146141806  | 7.6678   | 4.8243   | -0.6685 | 0.001221 |
| H2-DMb2       | chr17:34143306-34151553   | 0.5385   | 2.1670   | 2.0085  | 0.018588 |
| AI837181      | chr19:5425156-5427313     | 25.5090  | 37.5517  | 0.5579  | 0.018592 |
| Gm14125       | chr2:150305527-150306516  | 13.0141  | 6.6360   | -0.9717 | 0.006147 |
| Fdxacb1       | chr9:50768235-50773348    | 1.7873   | 4.2492   | 1.2494  | 0.066169 |
| Tnfsf8        | chr4:63831307-63861347    | 31.4530  | 45.2710  | 0.5254  | 0.092848 |
| 9030617O03Rik | chr12:100779056-100896981 | 8.4838   | 5.2945   | -0.6802 | 0.034116 |
| Chic2         | chr5:75001025-75044774    | 6.5107   | 9.1204   | 0.4863  | 0.001641 |
| Brf2          | chr8:27123831-27128632    | 3.5886   | 8.7357   | 1.2835  | 0.007996 |
| Car12         | chr9:66713685-66766845    | 5.8755   | 3.6112   | -0.7022 | 0.012700 |
| A430093F15Rik | chr19:10740946-10786043   | 17.9435  | 26.4937  | 0.5622  | 0.012555 |
| Syt11         | chr3:88744699-88775164    | 23.0560  | 32.6023  | 0.4998  | 0.050144 |
| Ubap2         | chr4:41194312-41275144    | 10.7322  | 6.7422   | -0.6707 | 0.052147 |
| Hic1          | chr11:75164564-75169519   | 1.7715   | 3.9361   | 1.1518  | 0.063423 |
| Fam212b       | chr3:105704598-105720842  | 1.4152   | 3.4924   | 1.3032  | 0.023468 |
| Ankrd50       | chr3:38449260-38484844    | 10.9767  | 8.0294   | -0.4511 | 0.019880 |
| Gm9208        | chrX:107279014-107279962  | 0.4529   | 3.3567   | 2.8897  | 0.100763 |
| Plekhg2       | chr7:28359603-28372599    | 21.9775  | 14.7293  | -0.5773 | 0.111934 |
| Ndfip1        | chr18:38418974-38464399   | 182.9788 | 247.3130 | 0.4347  | 0.029216 |
| Col27a1       | chr4:63214003-63334991    | 0.0874   | 0.4528   | 2.3731  | 0.004629 |
| 4921523L03Rik | chr9:107991683-107995656  | 1.0966   | 0.0117   | -6.5470 | 0.068517 |
| Lgalsl        | chr11:20823575-20831056   | 2.4049   | 4.5789   | 0.9290  | 0.021754 |
| Nfkbia        | chr12:55489410-55492647   | 144.8452 | 188.5725 | 0.3806  | 0.027021 |
| Serpina3g     | chr12:104236244-104241939 | 38.8566  | 61.8649  | 0.6710  | 0.102550 |
| Mrps10        | chr17:47368886-47381417   | 4.9385   | 3.3106   | -0.5770 | 0.012789 |
| Ctss          | chr3:95526785-95556403    | 168.9067 | 226.7701 | 0.4250  | 0.031228 |
| Sdf4          | chr4:155992871-156013610  | 65.2161  | 82.6903  | 0.3425  | 0.019217 |
| Ncapg         | chr5:45669921-45700544    | 9.0172   | 12.9463  | 0.5218  | 0.040531 |
| Pbdc1         | chrX:105079755-105117090  | 5.0760   | 7.9937   | 0.6552  | 0.037268 |
| Larp4         | chr15:99970073-100016351  | 19.3105  | 14.7726  | -0.3865 | 0.009616 |
| Tnik          | chr3:28263213-28675858    | 23.9420  | 18.9708  | -0.3358 | 0.039708 |
| ltk           | chr11:46325149-46389515   | 71.4251  | 57.3524  | -0.3166 | 0.010046 |
| 3110067C02Rik | chrX:150463725-150466156  | 0.0606   | 0.9284   | 3.9369  | 0.147420 |
| Faddos        | chr7:144567354-144581512  | 1.6038   | 5.7178   | 1.8340  | 0.004893 |
| Dynlt3        | chrX:9654266-9663003      | 14.1527  | 20.7550  | 0.5524  | 0.008662 |
| Nedd4l        | chr18:64887755-65217826   | 2.6879   | 1.6323   | -0.7196 | 0.001699 |
| Rit1          | chr3:88716837-88731049    | 7.6354   | 12.0078  | 0.6532  | 0.015038 |
| Mvb12a        | chr8:71542929-71548024    | 24.5457  | 39.8466  | 0.6990  | 0.028453 |
| Gm24299       | chr9:15314073-15314144    | 49.6721  | 12.3040  | -2.0133 | 0.030461 |
| Sh2d1a        | chrX:42502452-42523697    | 16.8041  | 24.9964  | 0.5729  | 0.019878 |
| NA            | chr13:21717627-21718115   | 11.5717  | 26.1894  | 1.1784  | 0.062984 |
| Hist1h4b      | chr13:23756936-23757427   | 49.6408  | 81.2035  | 0.7100  | 0.061178 |
| Prkag2        | chr5:24862743-25100642    | 9.2003   | 6.2331   | -0.5617 | 0.061942 |
| Anapc7        | chr5:122421692-122444912  | 13.0977  | 9.3296   | -0.4894 | 0.020944 |
| Tatdn2        | chr6:113697049-113711069  | 56.9731  | 45.9471  | -0.3103 | 0.002115 |
| Fam174b       | chr7:73740306-73776919    | 0.9665   | 2.7045   | 1.4845  | 0.046383 |
| Kif15         | chr9:122951080-123018725  | 13.5796  | 19.8821  | 0.5500  | 0.065571 |
| Tcerg1        | chr18:42511509-42575551   | 30.7511  | 23.9651  | -0.3597 | 0.003737 |
| Zfp407        | chr18:84128026-84589725   | 9.1119   | 6.6393   | -0.4567 | 0.042218 |



|               |                           |          |          |         |          |
|---------------|---------------------------|----------|----------|---------|----------|
| Nr4a3         | chr4:48045152-48086447    | 5.5543   | 3.5436   | -0.6484 | 0.019794 |
| Macf1         | chr4:123349632-123684360  | 144.3762 | 116.8992 | -0.3046 | 0.028238 |
| Myo5c         | chr9:75232013-75305451    | 0.0223   | 0.2968   | 3.7346  | 0.069191 |
| Tnpo1         | chr13:98839018-98926384   | 37.0008  | 30.1472  | -0.2955 | 0.002851 |
| Adam8         | chr7:139978931-139992562  | 4.2834   | 7.0731   | 0.7236  | 0.025046 |
| Bop1          | chr15:76452995-76477269   | 49.9464  | 35.3395  | -0.4991 | 0.078400 |
| Spc25         | chr2:69193894-69206194    | 3.6845   | 6.3718   | 0.7903  | 0.008208 |
| Fubp1         | chr3:152210457-152236830  | 96.9171  | 77.2993  | -0.3263 | 0.041134 |
| Atp6v1e1      | chr6:120795244-120822685  | 37.9861  | 58.0863  | 0.6127  | 0.035509 |
| Elavl1        | chr8:4284781-4325100      | 22.0704  | 17.5317  | -0.3321 | 0.000331 |
| Ugt1a7c       | chr1:88095061-88220002    | 0.0199   | 0.4582   | 4.5241  | 0.086474 |
| Serpina3f     | chr12:104214543-104221129 | 2.3433   | 4.8766   | 1.0573  | 0.009854 |
| Cxcr6         | chr9:123806476-123811754  | 19.2468  | 30.4337  | 0.6611  | 0.080427 |
| Mycbp2        | chr14:103113410-103346814 | 46.2316  | 35.9961  | -0.3610 | 0.082293 |
| Stxbp1        | chr2:32787601-32847239    | 0.2963   | 1.0597   | 1.8385  | 0.047083 |
| Dido1         | chr2:180657963-180709999  | 32.6267  | 26.7752  | -0.2852 | 0.009602 |
| Itm2b         | chr14:73362230-73385271   | 295.3428 | 369.4139 | 0.3228  | 0.016787 |
| Sgol1         | chr17:53674785-53689333   | 3.3933   | 5.7854   | 0.7697  | 0.015017 |
| Pik3r5        | chr11:68432120-68497849   | 16.0644  | 11.9822  | -0.4230 | 0.020535 |
| Gm16793       | chr8:35582571-35588972    | 4.8952   | 1.8423   | -1.4098 | 0.054489 |
| 9130020K20Rik | chr4:136347285-136350334  | 5.8963   | 3.0599   | -0.9463 | 0.070393 |
| Galnt14       | chr17:73493227-73710453   | 0.5465   | 0.1094   | -2.3209 | 0.061035 |
| Ccdc173       | chr2:69758032-69789575    | 1.0575   | 3.0373   | 1.5222  | 0.115897 |
| Rrp1b         | chr17:32036099-32062865   | 15.9823  | 12.4714  | -0.3578 | 0.008325 |
| Il1rl1        | chr1:40429569-40465415    | 8.6845   | 14.8402  | 0.7730  | 0.077058 |
| Ier5          | chr1:155096366-155099636  | 45.8707  | 60.3312  | 0.3953  | 0.031919 |
| Tmem2         | chr19:21778341-21858327   | 7.0664   | 10.2439  | 0.5357  | 0.038922 |
| Rac3          | chr11:120721469-120723969 | 0.0331   | 0.8483   | 4.6785  | 0.065060 |
| Laptm4a       | chr12:8921663-8938742     | 37.1479  | 49.8603  | 0.4246  | 0.006920 |
| Degs2         | chr12:108686791-108702306 | 25.3173  | 18.1835  | -0.4775 | 0.049710 |
| Gadd45a       | chr6:67035095-67037457    | 1.8912   | 4.4489   | 1.2342  | 0.019917 |
| 4930469K13Rik | chr11:33973960-34098554   | 23.2929  | 13.3121  | -0.8072 | 0.006720 |
| Mtrr          | chr13:68560779-68582121   | 15.5848  | 10.8677  | -0.5201 | 0.038996 |
| Abcb1a        | chr5:8660076-8748575      | 11.8391  | 19.4278  | 0.7146  | 0.079883 |
| Gng12         | chr6:66896396-67021350    | 4.1479   | 2.4079   | -0.7846 | 0.022524 |
| Sgol2         | chr1:57995970-58025899    | 4.4219   | 7.0948   | 0.6821  | 0.050956 |
| Ttbk2         | chr2:120732815-120850604  | 1.4585   | 2.3593   | 0.6939  | 0.006787 |
| Klb           | chr5:65348385-65384003    | 0.0001   | 0.3262   | 11.6716 | 0.140155 |
| Birc2         | chr9:7818235-7835255      | 44.7131  | 57.6712  | 0.3672  | 0.012145 |
| Bloc1s5       | chr13:38602708-38635109   | 12.1915  | 7.5759   | -0.6864 | 0.004514 |
| Mettl1        | chr10:127041413-127046365 | 10.0222  | 5.2226   | -0.9404 | 0.128276 |
| Itgb1         | chr8:128685653-128733200  | 199.4222 | 255.7565 | 0.3589  | 0.042637 |
| Klf10         | chr15:38294412-38300707   | 17.1424  | 24.2102  | 0.4980  | 0.035536 |
| Khsrp         | chr17:57021057-57031507   | 33.7612  | 24.9787  | -0.4347 | 0.059312 |
| Dot1l         | chr10:80755205-80795461   | 7.5677   | 5.5721   | -0.4416 | 0.011217 |
| Ifi47         | chr11:49076586-49096974   | 85.6979  | 113.6408 | 0.4071  | 0.047720 |
| Chd3          | chr11:69343272-69369406   | 116.9942 | 97.3556  | -0.2651 | 0.021279 |
| Hyou1         | chr9:44379489-44392369    | 27.9747  | 22.5600  | -0.3104 | 0.007738 |
| Fbxl22        | chr9:66508458-66514593    | 8.0823   | 4.6465   | -0.7986 | 0.127497 |
| Gm20507       | chr17:33630758-33645705   | 1.6834   | 3.8869   | 1.2072  | 0.025471 |
| Greb1l        | chr18:10325176-10562934   | 1.4128   | 0.6678   | -1.0811 | 0.092035 |
| Rasgrp1       | chr2:117279992-117343001  | 85.2430  | 69.7210  | -0.2900 | 0.012501 |
| Ccna2         | chr3:36564865-36572150    | 31.9822  | 45.7927  | 0.5178  | 0.078061 |
| 2900041M22Rik | chr11:117611246-117613857 | 0.0719   | 0.8908   | 3.6308  | 0.008759 |
| Snai3         | chr8:122454205-122460692  | 0.0404   | 0.7319   | 4.1788  | 0.004802 |
| 6230400D17Rik | chr14:20687235-20703012   | 23.1118  | 14.1591  | -0.7069 | 0.066826 |
| Rpgrip1l      | chr8:91217029-91313262    | 0.6425   | 1.1921   | 0.8916  | 0.000067 |
| Mybbp1a       | chr11:72441354-72451768   | 41.7585  | 32.1041  | -0.3793 | 0.076133 |
| Tert          | chr13:73627000-73649041   | 6.3211   | 3.5377   | -0.8374 | 0.066401 |
| Lmbr1         | chr5:29229813-29378390    | 1.4568   | 0.5068   | -1.5234 | 0.096861 |
| Fkbp4         | chr6:128429734-128438677  | 67.0818  | 47.8189  | -0.4883 | 0.119238 |
| Rcor1         | chr12:111039350-111115901 | 19.3891  | 14.8899  | -0.3809 | 0.021530 |
| Cpsf1         | chr15:76595808-76607591   | 30.8987  | 23.9817  | -0.3656 | 0.022650 |
| Bcl2          | chr1:106538177-106714274  | 44.9344  | 35.3951  | -0.3443 | 0.027623 |
| 2210417A02Rik | chr5:148741839-148743139  | 0.7498   | 4.9691   | 2.7284  | 0.068946 |
| Ttll4         | chr1:74661744-74701832    | 11.5186  | 8.8688   | -0.3772 | 0.019969 |
| Tpd52l2       | chr2:181497164-181517966  | 10.0028  | 14.3342  | 0.5191  | 0.020838 |
| Palm3         | chr8:84021470-84030295    | 11.6903  | 7.6381   | -0.6140 | 0.060798 |
| Cdc25c        | chr18:34732996-34751533   | 2.8931   | 6.1592   | 1.0901  | 0.053251 |
| 9230104M06Rik | chr12:112999963-113001926 | 1.2848   | 3.1774   | 1.3064  | 0.002172 |
| Gtse1         | chr15:85859706-85876572   | 3.0928   | 5.7330   | 0.8904  | 0.026441 |

|               |                           |          |          |         |          |
|---------------|---------------------------|----------|----------|---------|----------|
| Scml4         | chr10:42860369-42960780   | 12.7447  | 9.6753   | -0.3975 | 0.017948 |
| Ablim1        | chr19:57032732-57314919   | 78.9271  | 67.3580  | -0.2287 | 0.000091 |
| Klh3          | chr13:58004220-58113592   | 4.5417   | 2.4814   | -0.8721 | 0.033504 |
| Zfp300        | chrX:21079173-21089527    | 0.9496   | 2.2444   | 1.2409  | 0.036555 |
| Tmem109       | chr19:10870659-10882001   | 4.8777   | 8.0874   | 0.7295  | 0.029933 |
| Zfp189        | chr4:49521175-49531517    | 1.9053   | 4.2158   | 1.1458  | 0.078355 |
| 1700055D18Rik | chr4:45012829-45014399    | 0.0953   | 1.0610   | 3.4767  | 0.005626 |
| Bzrap1        | chr11:87760540-87785928   | 1.7717   | 3.0895   | 0.8023  | 0.088891 |
| Pkn3          | chr2:30077683-30091022    | 0.4308   | 1.2042   | 1.4830  | 0.001532 |
| Anxa2         | chr9:69453619-69491795    | 24.3544  | 33.8067  | 0.4731  | 0.076060 |
| Cd74          | chr18:60803847-60812646   | 43.4464  | 63.6819  | 0.5516  | 0.063060 |
| Arhgap20      | chr9:51765336-51853856    | 2.9712   | 1.8903   | -0.6525 | 0.084486 |
| Eif4g1        | chr16:20668312-20692884   | 88.0750  | 73.6967  | -0.2571 | 0.009567 |
| Adpgk         | chr9:59291571-59316199    | 36.6149  | 27.5596  | -0.4099 | 0.017692 |
| Cdkn3         | chr14:46760540-46771525   | 3.9193   | 12.1856  | 1.6365  | 0.080571 |
| Ccndbp1       | chr2:121008402-121016904  | 15.5339  | 20.7844  | 0.4201  | 0.001304 |
| Ifitm3        | chr7:141009585-141010770  | 0.9406   | 4.7878   | 2.3477  | 0.019799 |
| Slc46a1       | chr11:78465696-78472059   | 0.0278   | 0.4192   | 3.9127  | 0.011979 |
| Dph2          | chr4:117888642-117892032  | 11.3347  | 7.7753   | -0.5438 | 0.002444 |
| Tmem51        | chr4:142030991-142084304  | 0.1568   | 1.2303   | 2.9721  | 0.036303 |
| Emp3          | chr7:45918022-45921426    | 78.6675  | 106.0908 | 0.4315  | 0.027509 |
| Tm6sf2        | chr8:70072923-70080066    | 0.1854   | 1.2398   | 2.7416  | 0.091488 |
| Rnu12         | chr15:83149643-83149794   | 0.2829   | 6.7275   | 4.5716  | 0.062221 |
| Iltgae        | chr11:73090582-73147446   | 26.4247  | 39.6372  | 0.5850  | 0.129774 |
| 0610030E20Rik | chr6:72347316-72353158    | 13.5717  | 9.8966   | -0.4556 | 0.027193 |
| Cntn2         | chr1:132509424-132542940  | 0.0081   | 0.1051   | 3.6910  | 0.007749 |
| Chdn10        | chr14:118787870-118875489 | 2.3325   | 0.8291   | -1.4923 | 0.039801 |
| Mrvi1         | chr7:110868265-110982461  | 0.0220   | 0.2403   | 3.4497  | 0.007783 |
| Il21          | chr3:37222758-37232618    | 2.9476   | 10.2996  | 1.8050  | 0.136471 |
| B9d1          | chr11:61505143-61512931   | 0.3636   | 1.8580   | 2.3533  | 0.005751 |
| Dcxr          | chr11:120725398-120727281 | 3.1030   | 7.7802   | 1.3261  | 0.056779 |
| Susd3         | chr13:49230689-49248706   | 4.7278   | 8.2192   | 0.7978  | 0.061888 |
| Igf2bp3       | chr6:49085220-49214954    | 1.2974   | 2.9730   | 1.1963  | 0.026339 |
| Snx14         | chr9:88376746-88438958    | 15.2365  | 22.5181  | 0.5636  | 0.052252 |
| Kif4          | chrX:100625736-100727214  | 7.3485   | 10.7584  | 0.5499  | 0.060687 |
| Gm26734       | chr17:94834905-94836642   | 0.0135   | 0.7571   | 5.8099  | 0.119438 |
| Prkd2         | chr7:16842901-16870461    | 40.6614  | 30.3689  | -0.4211 | 0.085995 |
| Wdyh1         | chr15:58141435-58158652   | 12.7671  | 19.8050  | 0.6334  | 0.006931 |
| Dusp1         | chr17:26505589-26508519   | 5.6139   | 9.5778   | 0.7707  | 0.059940 |
| Safb2         | chr17:56560964-56584585   | 17.3081  | 12.4220  | -0.4785 | 0.117208 |
| March1        | chr8:65617899-66471637    | 0.0121   | 0.1779   | 3.8835  | 0.021420 |
| Gm17025       | chr15:81415559-81419188   | 3.4876   | 0.6313   | -2.4658 | 0.016621 |
| Gm16702       | chr17:8379044-8389468     | 0.6228   | 2.5116   | 2.0119  | 0.009540 |
| Aldh3a1       | chr11:61207536-61218421   | 0.9150   | 0.1003   | -3.1899 | 0.040687 |
| Snx25         | chr8:46033260-46152159    | 11.6071  | 16.0770  | 0.4700  | 0.031904 |
| Hsp90ab1      | chr17:45567774-45573271   | 498.2469 | 388.2500 | -0.3599 | 0.134890 |
| Fam45a        | chr19:60811584-60836227   | 5.3554   | 8.1652   | 0.6085  | 0.032860 |
| Efr3b         | chr12:3962553-4038915     | 0.0099   | 0.1822   | 4.2039  | 0.078669 |
| Camp          | chr9:109847374-109849456  | 0.0001   | 1.7967   | 14.1331 | 0.157176 |
| Cdca5         | chr19:6084982-6091777     | 4.7160   | 8.2832   | 0.8126  | 0.013003 |
| Magi3         | chr3:104013258-104220374  | 10.6606  | 7.8532   | -0.4409 | 0.047884 |
| Evl           | chr12:108554719-108688513 | 93.5632  | 74.9578  | -0.3199 | 0.033393 |
| Hist1h4a      | chr13:23760801-23761249   | 27.2547  | 48.3833  | 0.8280  | 0.069413 |
| BC005561      | chr5:104508351-104522383  | 9.6962   | 6.6823   | -0.5371 | 0.050142 |
| Card11        | chr5:140872998-141000596  | 36.1158  | 28.6461  | -0.3343 | 0.022486 |
| Cd8a          | chr6:71373426-71379171    | 0.6451   | 0.0744   | -3.1170 | 0.034748 |
| Yif1b         | chr7:29238328-29247593    | 11.2612  | 19.1979  | 0.7696  | 0.038999 |
| Coq7          | chr7:118509658-118533356  | 0.7318   | 1.8280   | 1.3207  | 0.019904 |
| Slc7a5        | chr8:121881149-121907694  | 13.8366  | 10.1031  | -0.4537 | 0.003317 |
| Cd3g          | chr9:44969571-44980431    | 445.5646 | 562.3733 | 0.3359  | 0.031537 |
| Klh15         | chrX:94234598-94277724    | 3.9020   | 2.7338   | -0.5133 | 0.006099 |
| Arhgap15os    | chr2:44059237-44065324    | 8.6561   | 4.4262   | -0.9676 | 0.073630 |
| Sema6d        | chr2:124089968-124667770  | 0.1994   | 0.5637   | 1.4995  | 0.057105 |
| Trav6-3       | chr14:53428710-53430375   | 0.4046   | 4.2122   | 3.3801  | 0.083704 |
| Hist1h2bj     | chr13:22043213-22043676   | 56.7981  | 92.7669  | 0.7078  | 0.103714 |
| Zscan29       | chr2:121158272-121171125  | 25.7964  | 20.5683  | -0.3268 | 0.018435 |
| Zfp608        | chr18:54888044-54990180   | 1.4833   | 0.7066   | -1.0699 | 0.014555 |
| 8430419L09Rik | chr6:135197976-135244955  | 5.1492   | 3.5535   | -0.5351 | 0.000876 |
| Inpp5b        | chr4:124741849-124801511  | 26.8489  | 34.2000  | 0.3491  | 0.007439 |
| Tanc1         | chr2:59612041-59846149    | 3.2134   | 2.2620   | -0.5065 | 0.039976 |
| Sox4          | chr13:28948918-28953713   | 10.4258  | 6.5206   | -0.6771 | 0.116479 |

|                |                           |            |           |         |          |
|----------------|---------------------------|------------|-----------|---------|----------|
| Mmab           | chr5:114431033-114444059  | 6.6085     | 4.1104    | -0.6851 | 0.019673 |
| Rtp4           | chr16:23609918-23614222   | 21.8057    | 33.8444   | 0.6342  | 0.072616 |
| Ryk            | chr9:102834916-102908305  | 1.7237     | 3.4201    | 0.9885  | 0.031360 |
| Serinc5        | chr13:92611137-92711944   | 15.4862    | 20.3068   | 0.3910  | 0.017384 |
| Mettl21a       | chr1:64606472-64617242    | 6.1884     | 9.9972    | 0.6920  | 0.018688 |
| Plin3          | chr17:56278961-56290511   | 11.8511    | 18.5840   | 0.6490  | 0.026795 |
| Stab2          | chr10:86841197-87008025   | 0.0074     | 0.1266    | 4.0941  | 0.024492 |
| NA             | chr5:146261002-146261084  | 27224.1396 | 8341.5167 | -1.7065 | 0.058241 |
| Fibcd1         | chr2:31813289-31846005    | 0.1301     | 0.6665    | 2.3568  | 0.021681 |
| Traf3ip1       | chr1:91494667-91529303    | 5.6260     | 3.5600    | -0.6602 | 0.002401 |
| Sfpq           | chr4:127021323-127037013  | 108.5606   | 90.6853   | -0.2596 | 0.011380 |
| Spry1          | chr3:37639946-37644598    | 18.2059    | 11.8452   | -0.6201 | 0.115025 |
| Dhrs7          | chr12:72650355-72664828   | 15.0970    | 23.8674   | 0.6608  | 0.015545 |
| Cib1           | chr7:80227155-80232813    | 11.1229    | 16.5329   | 0.5718  | 0.009677 |
| Rsad2          | chr12:26442752-26456452   | 3.3041     | 6.4697    | 0.9694  | 0.126566 |
| Casp4          | chr9:5308827-5336783      | 23.2742    | 32.5385   | 0.4834  | 0.059324 |
| Uck2           | chr1:167226089-167285127  | 82.0779    | 62.1540   | -0.4011 | 0.069114 |
| Zdhhc21        | chr4:82798737-82859958    | 8.5888     | 6.5781    | -0.3848 | 0.040004 |
| Bptf           | chr11:107033080-107132127 | 29.9235    | 24.0276   | -0.3166 | 0.065567 |
| Foxred2        | chr15:77940521-77956722   | 5.6450     | 3.7304    | -0.5976 | 0.045240 |
| Hist1h3b       | chr13:23752266-23752886   | 89.0942    | 144.7645  | 0.7003  | 0.189506 |
| Pcyt2          | chr11:120610086-120617936 | 15.6439    | 11.3539   | -0.4624 | 0.031456 |
| Phf2           | chr13:48801749-48870885   | 13.8541    | 9.4037    | -0.5590 | 0.063420 |
| Fcnaos         | chr2:25607891-25631761    | 1.1051     | 0.1063    | -3.3778 | 0.077261 |
| Lef1           | chr3:131110470-131224356  | 20.3180    | 16.3667   | -0.3120 | 0.018362 |
| Chn1os3        | chr2:73596525-73616012    | 0.0771     | 0.7060    | 3.1941  | 0.046038 |
| Lipt2          | chr7:100159276-100161365  | 3.1523     | 0.8267    | -1.9310 | 0.019569 |
| NA             | chr13:23575762-23577011   | 20.3598    | 36.8644   | 0.8565  | 0.147831 |
| Rab11fip5      | chr6:85334962-85374634    | 0.1857     | 0.8314    | 2.1624  | 0.001440 |
| Rbm3           | chrX:8138974-8145880      | 31.7940    | 25.3414   | -0.3273 | 0.013149 |
| Gm16337        | chr3:9757606-9786142      | 2.3708     | 0.4508    | -2.3948 | 0.041272 |
| C78197         | chr11:68192192-68196153   | 3.8368     | 6.1628    | 0.6837  | 0.012826 |
| Il3ra          | chr14:14346494-14355490   | 3.1734     | 6.6606    | 1.0696  | 0.038981 |
| Il18rap        | chr1:40515361-40551705    | 5.7029     | 8.6647    | 0.6035  | 0.039258 |
| Vrk1           | chr12:106010262-106077410 | 20.1016    | 26.9134   | 0.4210  | 0.020325 |
| Cmtm7          | chr9:114756836-114781993  | 53.3230    | 75.5112   | 0.5019  | 0.078846 |
| Gm20732        | chr15:68340982-68363176   | 3.9129     | 0.4831    | -3.0179 | 0.043872 |
| Gm22343        | chr12:4394481-4394767     | 5.4194     | 0.6817    | -2.9910 | 0.031329 |
| Slc7a1         | chr5:148327409-148399904  | 10.6606    | 7.9700    | -0.4196 | 0.038465 |
| Gbp3           | chr3:142560051-142573209  | 44.4470    | 56.7874   | 0.3535  | 0.024810 |
| Tmprss11e      | chr5:86705185-86745815    | 0.0439     | 0.4595    | 3.3891  | 0.010066 |
| Sh3rf2         | chr18:42053666-42158960   | 0.0162     | 0.3254    | 4.3287  | 0.093468 |
| Gm15466        | chr3:8882237-8882570      | 0.1283     | 3.0392    | 4.5565  | 0.047936 |
| Gm26534        | chr11:60879117-60887218   | 0.2408     | 1.3892    | 2.5286  | 0.036063 |
| Uqcrb          | chr13:66900616-66905378   | 13.7660    | 23.7440   | 0.7865  | 0.045950 |
| Gm16310        | chr16:92094567-92096490   | 9.1748     | 3.9142    | -1.2290 | 0.072718 |
| Rnf19b         | chr4:129058270-129085886  | 26.9819    | 36.8688   | 0.4504  | 0.067755 |
| Fam209         | chr2:172472519-172474331  | 0.5392     | 3.5872    | 2.7339  | 0.119920 |
| Snora26        | chr5:74093529-74093650    | 0.0001     | 8.1140    | 16.3081 | 0.180768 |
| Capg           | chr6:72544390-72562983    | 92.6093    | 122.6557  | 0.4054  | 0.114088 |
| Mettl2         | chr11:105126424-105140394 | 13.4034    | 9.4994    | -0.4967 | 0.031377 |
| Trav15-1-dv6-1 | chr14:53559675-53560247   | 11.5993    | 3.4168    | -1.7633 | 0.107899 |
| Gm17088        | chr6:134168878-134172007  | 0.0470     | 1.7680    | 5.2336  | 0.224848 |
| N4bp2l1        | chr5:150571642-150594525  | 20.1665    | 27.6960   | 0.4577  | 0.007609 |
| Tktl1          | chrX:74177258-74208500    | 0.5313     | 1.6656    | 1.6484  | 0.005166 |
| Gng2           | chr14:19872558-19977627   | 17.2545    | 23.1241   | 0.4224  | 0.024358 |
| Havcr2         | chr11:46454934-46481255   | 2.5715     | 4.5134    | 0.8116  | 0.000729 |
| Rab28          | chr5:41624975-41708155    | 8.2089     | 13.3699   | 0.7037  | 0.015471 |
| Ubc            | chr5:125385964-125390202  | 35.9467    | 46.9861   | 0.3864  | 0.041648 |
| Il12rb1        | chr8:70808448-70821424    | 16.1643    | 23.5192   | 0.5410  | 0.050175 |
| Zfp959         | chr17:55892183-55898584   | 9.5254     | 17.0497   | 0.8399  | 0.083502 |
| Ppm1b          | chr17:84956740-85023991   | 19.3019    | 14.9955   | -0.3642 | 0.026402 |
| Gm6822         | chr1:55160739-55161053    | 4.9118     | 0.3904    | -3.6534 | 0.109241 |
| Tnfrsf4        | chr4:156013842-156016612  | 180.2141   | 243.4760  | 0.4341  | 0.116328 |
| Ramp3          | chr11:6658520-6677475     | 0.1900     | 1.3948    | 2.8757  | 0.011861 |
| Gab3           | chrX:74966842-75085458    | 0.7032     | 2.0185    | 1.5213  | 0.008834 |
| Gm15163        | chrX:157015330-157120545  | 0.0194     | 0.4744    | 4.6141  | 0.212070 |
| Asl            | chr5:130011257-130025132  | 4.8807     | 7.3860    | 0.5977  | 0.015614 |
| Lta            | chr17:35203164-35205351   | 21.9929    | 14.8457   | -0.5670 | 0.012868 |
| Dctn4          | chr18:60526220-60558762   | 19.6655    | 25.4852   | 0.3740  | 0.005842 |
| Ifi204         | chr1:173747292-173766876  | 0.6864     | 2.9753    | 2.1158  | 0.102161 |

|               |                           |          |          |         |          |
|---------------|---------------------------|----------|----------|---------|----------|
| Snord49b      | chr11:62603078-62603150   | 2.9466   | 21.3072  | 2.8542  | 0.000099 |
| Ugt1a6a       | chr1:88103251-88220002    | 0.0236   | 0.2651   | 3.4875  | 0.024006 |
| Fuca2         | chr10:13499539-13519035   | 3.9942   | 5.7078   | 0.5150  | 0.003211 |
| Ifngr1        | chr10:19591948-19610229   | 79.5781  | 104.9863 | 0.3998  | 0.066146 |
| Cstb          | chr10:78425669-78427619   | 23.3673  | 36.6769  | 0.6504  | 0.009661 |
| Serpinf1      | chr11:75409768-75422701   | 0.4593   | 1.5909   | 1.7924  | 0.045527 |
| Smg1          | chr7:118131307-118243637  | 38.3939  | 31.3758  | -0.2912 | 0.056896 |
| Asap1         | chr15:64086856-64382919   | 13.0437  | 9.8238   | -0.4090 | 0.061126 |
| Arl5a         | chr2:52397950-52424901    | 34.5544  | 44.3985  | 0.3616  | 0.048497 |
| Ift43         | chr12:86082560-86162458   | 0.1654   | 1.9978   | 3.5943  | 0.079516 |
| Tmem241       | chr18:11981302-12121480   | 2.3800   | 4.1094   | 0.7880  | 0.001464 |
| Adap1         | chr5:139271875-139325622  | 12.3306  | 18.9189  | 0.6176  | 0.084810 |
| Gm14584       | chrX:53418330-53418967    | 4.8804   | 1.1075   | -2.1397 | 0.008991 |
| Lsm6          | chr8:78804864-78821140    | 6.6948   | 10.7896  | 0.6885  | 0.063572 |
| Adamts17      | chr7:66839734-67152625    | 0.0090   | 0.1478   | 4.0415  | 0.022365 |
| Fam193b       | chr13:55539318-55571120   | 22.9704  | 17.7376  | -0.3730 | 0.041646 |
| Lmntd2        | chr7:141210042-141214082  | 1.9311   | 4.1609   | 1.1074  | 0.042629 |
| Yae1d1        | chr13:17986639-17993351   | 3.0689   | 1.6263   | -0.9161 | 0.008297 |
| Isoc2b        | chr7:4844958-4866193      | 4.9769   | 10.1895  | 1.0338  | 0.073727 |
| Cox7a2l       | chr17:83501918-83514333   | 76.4497  | 110.8453 | 0.5360  | 0.073302 |
| Ocel1         | chr8:71371297-71379361    | 11.1069  | 7.7340   | -0.5222 | 0.147109 |
| Gm10012       | chr17:25901855-25902227   | 6.2263   | 0.4609   | -3.7558 | 0.084922 |
| Ppbp          | chr5:90768517-90770060    | 0.0001   | 0.9079   | 13.1483 | 0.228027 |
| Ctsb          | chr14:63122461-63145919   | 54.7585  | 68.0572  | 0.3137  | 0.036035 |
| Gabarap       | chr11:69991142-69994951   | 69.1680  | 90.2900  | 0.3845  | 0.054238 |
| Nsun7         | chr5:66259911-66298016    | 0.0639   | 0.4177   | 2.7076  | 0.053673 |
| Gm9320        | chr17:70853766-70875965   | 0.4339   | 4.2800   | 3.3022  | 0.104935 |
| Atg4a         | chrX:140956906-141164270  | 3.1009   | 5.9802   | 0.9475  | 0.061377 |
| Pnkd          | chr1:74284929-74353694    | 1.1119   | 2.2387   | 1.0096  | 0.011565 |
| Cass4         | chr2:172393793-172433757  | 3.2005   | 5.1097   | 0.6749  | 0.040577 |
| Gm9958        | chr5:90367203-90368487    | 0.8316   | 3.5161   | 2.0800  | 0.034991 |
| Mapk9         | chr11:49846750-49886421   | 14.3750  | 18.2713  | 0.3460  | 0.006953 |
| Nlgn2         | chr11:69823121-69837784   | 1.7871   | 0.8087   | -1.1439 | 0.045905 |
| Ska2          | chr11:87109233-87124635   | 5.1422   | 8.8728   | 0.7870  | 0.036716 |
| Asf1b         | chr8:83955506-83970197    | 10.2396  | 16.1893  | 0.6609  | 0.055184 |
| Soat2         | chr15:102150525-102163474 | 0.8756   | 2.2001   | 1.3292  | 0.005149 |
| Bysl          | chr17:47599330-47611492   | 18.2090  | 13.2124  | -0.4628 | 0.065697 |
| Pea15a        | chr1:172196727-172206804  | 9.2984   | 13.8313  | 0.5729  | 0.042169 |
| Mfsd7c        | chr12:85746538-85813585   | 0.0436   | 0.4568   | 3.3886  | 0.051106 |
| Hist1h2ag     | chr13:22042478-22042949   | 16.4854  | 30.5834  | 0.8916  | 0.083035 |
| Tgfb3         | chr5:107106569-107289629  | 8.4302   | 6.2629   | -0.4288 | 0.023643 |
| Oasl1         | chr5:114923239-114937915  | 2.5140   | 4.9070   | 0.9649  | 0.048166 |
| Fam220a       | chr5:143548707-143564531  | 8.8236   | 5.7179   | -0.6259 | 0.013915 |
| Rasa2         | chr9:96539299-96631617    | 17.6115  | 13.8142  | -0.3504 | 0.060909 |
| Urb1          | chr16:90751526-90810413   | 12.6805  | 9.7434   | -0.3801 | 0.063134 |
| Ralgps2       | chr1:156804165-156939626  | 12.0788  | 9.2432   | -0.3860 | 0.028204 |
| Sec24a        | chr11:51692263-51763634   | 6.0894   | 4.4007   | -0.4686 | 0.055141 |
| Tmem30b       | chr12:73543113-73546395   | 0.7791   | 0.1330   | -2.5505 | 0.075635 |
| Actn1         | chr12:80167541-80260371   | 36.0395  | 28.1591  | -0.3560 | 0.062537 |
| Ndufa3        | chr7:3617372-3620163      | 42.0351  | 63.3399  | 0.5915  | 0.051033 |
| Xpo6          | chr7:126101714-126200501  | 31.1730  | 25.7690  | -0.2747 | 0.035726 |
| C330011M18Rik | chr8:84065235-84067287    | 3.2787   | 6.3133   | 0.9453  | 0.036808 |
| Clic1         | chr17:35049965-35058749   | 121.8223 | 154.3745 | 0.3417  | 0.045439 |
| Jam2          | chr16:84774122-84825928   | 1.2046   | 0.5785   | -1.0581 | 0.000374 |
| Hist2h4       | chr3:96261703-96263311    | 46.0382  | 90.9583  | 0.9824  | 0.077701 |
| Ptger3        | chr3:157566891-157644758  | 1.9195   | 0.6168   | -1.6378 | 0.060340 |
| Firre         | chrX:50555743-50635321    | 0.3757   | 1.8404   | 2.2924  | 0.018148 |
| Polm          | chr11:5827859-5838016     | 9.0501   | 5.8534   | -0.6287 | 0.090621 |
| Itga2b        | chr11:102453296-102470122 | 0.9068   | 0.3196   | -1.5043 | 0.052398 |
| Nqo1          | chr8:107388224-107403206  | 0.7563   | 3.0508   | 2.0121  | 0.037884 |
| 1810034E14Rik | chr13:64248745-64268145   | 2.4050   | 5.1901   | 1.1097  | 0.049157 |
| Phlpp2        | chr8:109868541-109944671  | 0.8800   | 1.5383   | 0.8057  | 0.009947 |
| Carns1        | chr19:4164323-4175479     | 9.0788   | 5.7372   | -0.6622 | 0.118023 |
| Zfp653        | chr9:22055459-22071345    | 12.3912  | 7.7201   | -0.6826 | 0.067635 |
| Pabpc4        | chr4:123262350-123298925  | 11.8976  | 8.3986   | -0.5024 | 0.031072 |
| Gm21986       | chrX:101295838-101321348  | 4.9934   | 3.2346   | -0.6264 | 0.049265 |
| Txnrd3        | chr6:89643987-89675529    | 5.1481   | 2.7619   | -0.8984 | 0.098712 |
| 4933439K11Rik | chr1:172538132-172558129  | 2.1118   | 0.7770   | -1.4424 | 0.065852 |
| Stx11         | chr10:12939982-12964259   | 22.6602  | 31.3077  | 0.4664  | 0.085434 |
| E030030I06Rik | chr10:22113049-221148823  | 0.6093   | 1.8735   | 1.6205  | 0.112128 |
| Lss           | chr10:76531587-76557138   | 4.8947   | 3.6667   | -0.4167 | 0.005890 |

|               |                           |          |          |         |          |
|---------------|---------------------------|----------|----------|---------|----------|
| Cnrip1        | chr11:17051585-17079371   | 0.4849   | 1.2499   | 1.3661  | 0.042827 |
| Tcf7          | chr11:52252370-52283014   | 92.1087  | 73.1515  | -0.3325 | 0.104449 |
| Gm20708       | chr11:117809667-117839904 | 9.4821   | 14.3561  | 0.5984  | 0.010314 |
| Fam208b       | chr13:3566035-3611108     | 35.6468  | 29.0460  | -0.2954 | 0.036095 |
| Hist1h2ai     | chr13:21716411-21717452   | 27.5154  | 43.2774  | 0.6534  | 0.152515 |
| Aaed1         | chr13:64291835-64312710   | 8.4022   | 15.5339  | 0.8866  | 0.025045 |
| Gfi1          | chr5:107716656-107726036  | 14.0749  | 18.5867  | 0.4011  | 0.004422 |
| Tecpr1        | chr5:144194441-144223615  | 35.2740  | 28.1322  | -0.3264 | 0.089516 |
| M6pr          | chr6:122308719-122317680  | 75.6623  | 92.2027  | 0.2852  | 0.014732 |
| Bcam          | chr7:19756130-19771016    | 1.2067   | 2.7299   | 1.1778  | 0.092373 |
| Aldh16a1      | chr7:45140683-45154584    | 6.0349   | 8.3563   | 0.4695  | 0.009900 |
| Plekhb1       | chr7:100642891-100662414  | 2.1737   | 1.0822   | -1.0062 | 0.002745 |
| Swap70        | chr7:110221702-110283503  | 29.5026  | 37.9730  | 0.3641  | 0.046019 |
| Oat           | chr7:132557474-132576398  | 20.7462  | 27.8361  | 0.4241  | 0.012422 |
| Ppp1r3b       | chr8:35375740-35388124    | 3.9155   | 2.4572   | -0.6722 | 0.001555 |
| Rab11a        | chr9:64715298-64737758    | 19.4416  | 26.2356  | 0.4324  | 0.034828 |
| Ccnb2         | chr9:70407688-70421554    | 25.0279  | 34.6081  | 0.4676  | 0.036887 |
| Hmgb3         | chrX:71555917-71560676    | 1.6930   | 4.0852   | 1.2708  | 0.081782 |
| Med12         | chrX:101274029-101297465  | 33.3763  | 26.1867  | -0.3500 | 0.112374 |
| Spatc1        | chr15:76268088-76292572   | 1.1264   | 0.0990   | -3.5085 | 0.148894 |
| Ncf4          | chr15:78244800-78262580   | 33.0243  | 43.7167  | 0.4047  | 0.016868 |
| Nisch         | chr14:31170929-31216946   | 22.1797  | 18.4477  | -0.2658 | 0.031528 |
| Noxo1         | chr17:24696233-24700529   | 0.5039   | 1.4603   | 1.5351  | 0.006352 |
| Ndufv2        | chr17:66078794-66101559   | 39.0597  | 51.8177  | 0.4078  | 0.035225 |
| Alcam         | chr16:52248995-52454074   | 8.7822   | 12.4211  | 0.5001  | 0.116273 |
| Scd2          | chr19:44293675-44306864   | 32.6104  | 25.7503  | -0.3407 | 0.076752 |
| A530040E14Rik | chr1:85105945-85114035    | 0.9704   | 2.4170   | 1.3165  | 0.010202 |
| Pogk          | chr1:166384621-166409863  | 8.5252   | 5.8246   | -0.5496 | 0.163677 |
| Gm26533       | chr18:31781225-31789045   | 13.6873  | 8.7052   | -0.6529 | 0.035201 |
| Ssna1         | chr2:25271038-25272438    | 18.9050  | 27.3741  | 0.5340  | 0.010562 |
| mt-Cytb       | chrM:14144-15288          | 366.7702 | 286.1805 | -0.3580 | 0.121544 |
| Arhgef10l     | chr4:140514484-140666012  | 0.3673   | 0.0320   | -3.5218 | 0.113350 |
| Cpne7         | chr8:123117373-123135182  | 0.0852   | 0.6620   | 2.9576  | 0.147735 |
| Gm14862       | chrX:9250927-9256899      | 0.0246   | 1.2155   | 5.6243  | 0.153261 |
| Polr2k-ps     | chr11:95761490-95761665   | 0.2441   | 5.8192   | 4.5751  | 0.147564 |
| Usp34         | chr11:23306894-23490560   | 19.0049  | 15.2348  | -0.3190 | 0.078353 |
| Rhob          | chr12:8497762-8499985     | 1.6155   | 3.5170   | 1.1224  | 0.018900 |
| Trav16n       | chr14:53351089-53351621   | 13.0961  | 5.1175   | -1.3556 | 0.004397 |
| Flot2         | chr11:78037930-78060434   | 6.4537   | 10.0086  | 0.6330  | 0.048162 |
| Pik3r4        | chr9:105642994-105687655  | 15.2778  | 11.7685  | -0.3765 | 0.027699 |
| Hist1h3a      | chr13:23761852-23762386   | 40.3935  | 67.0620  | 0.7314  | 0.150458 |
| Slc16a5       | chr11:115462473-115474398 | 3.2447   | 1.5399   | -1.0753 | 0.076070 |
| Actg2         | chr6:83512904-83536265    | 7.0042   | 12.1685  | 0.7969  | 0.030173 |
| Prmt5         | chr14:54507186-54517525   | 26.3274  | 20.2644  | -0.3776 | 0.065152 |
| Gm17207       | chr5:73210108-73212634    | 0.2675   | 2.0389   | 2.9304  | 0.011491 |
| Cdkn2c        | chr4:109660875-109667189  | 12.2724  | 18.2644  | 0.5736  | 0.088446 |
| Gm16586       | chr1:178321107-178324171  | 84.4772  | 67.4783  | -0.3241 | 0.058908 |
| Lman1         | chr18:65980753-66022580   | 8.9204   | 11.7649  | 0.3993  | 0.012545 |
| Stau1         | chr2:166947548-166996299  | 12.9758  | 10.0783  | -0.3646 | 0.025469 |
| Gm11491       | chr11:87121566-87126958   | 2.9378   | 6.6279   | 1.1738  | 0.039712 |
| Gm26809       | chr6:18844219-18847360    | 1.3017   | 0.4293   | -1.6004 | 0.033162 |
| Gm26759       | chr8:126566969-126590988  | 29.4676  | 39.7362  | 0.4313  | 0.002415 |
| Zmynd10       | chr9:107547309-107551319  | 2.4234   | 0.8559   | -1.5016 | 0.019865 |
| Cst3          | chr2:148871721-148875692  | 22.6510  | 32.5455  | 0.5229  | 0.038404 |
| Sdc4          | chr2:164424246-164443887  | 5.9037   | 8.9493   | 0.6002  | 0.010766 |
| Chil5         | chr3:106016918-106024916  | 15.2113  | 7.4218   | -1.0353 | 0.100004 |
| Stil          | chr4:115000158-115043196  | 1.7709   | 3.3580   | 0.9231  | 0.079381 |
| Reep5         | chr18:34344888-34373415   | 15.6401  | 21.2500  | 0.4422  | 0.020968 |
| Mt1           | chr8:94179088-94180325    | 0.1706   | 2.5650   | 3.9103  | 0.147630 |
| Qser1         | chr2:104754794-104816696  | 2.6494   | 1.5445   | -0.7785 | 0.046620 |
| Gm14540       | chr6:33038467-33043222    | 2.1928   | 0.9579   | -1.1948 | 0.050669 |
| A130051J06Rik | chr15:95787855-95791642   | 3.4749   | 1.8200   | -0.9331 | 0.002168 |
| Celf1         | chr2:90940381-91019497    | 31.2889  | 25.6214  | -0.2883 | 0.049289 |
| Cdk19         | chr10:40349307-40483818   | 16.8203  | 21.8507  | 0.3775  | 0.040127 |
| Slfm2         | chr11:83065111-83070678   | 235.4831 | 289.3860 | 0.2974  | 0.032635 |
| Vmp1          | chr11:86583864-86683836   | 96.4058  | 119.9869 | 0.3157  | 0.035776 |
| Ckap2         | chr8:22168151-22185819    | 8.2774   | 12.8465  | 0.6341  | 0.045098 |
| Lmbrd2        | chr15:9140620-9198318     | 3.9353   | 6.5049   | 0.7250  | 0.065198 |
| Kmt2d         | chr15:98831668-98871204   | 9.3150   | 6.4563   | -0.5288 | 0.260462 |
| Zc3h13        | chr14:75284372-75344426   | 15.9286  | 12.5508  | -0.3438 | 0.031161 |
| Pcyt1a        | chr16:32430920-32475070   | 3.8559   | 6.0409   | 0.6477  | 0.127079 |

|               |                           |          |          |         |          |
|---------------|---------------------------|----------|----------|---------|----------|
| Gm15674       | chr1:130422823-130437914  | 4.5505   | 2.1644   | -1.0721 | 0.064954 |
| Sema6c        | chr3:95160456-95174024    | 0.6038   | 0.1148   | -2.3946 | 0.110583 |
| Wls           | chr3:159839736-159935833  | 27.1746  | 34.3192  | 0.3368  | 0.009921 |
| Gm24500       | chr15:34139252-34139376   | 1.7221   | 15.4779  | 3.1680  | 0.176660 |
| 2610001J05Rik | chr6:13867734-13871518    | 3.0455   | 4.9697   | 0.7065  | 0.007659 |
| Epha1         | chr6:42358486-42373268    | 2.3847   | 1.0702   | -1.1559 | 0.065371 |
| Prc1          | chr7:80294449-80316259    | 7.9938   | 10.8406  | 0.4395  | 0.077542 |
| Gm13212       | chr4:145585165-145625345  | 1.1178   | 2.4953   | 1.1586  | 0.108217 |
| Bloc1s6       | chr2:122738502-122749475  | 5.6175   | 8.7989   | 0.6474  | 0.045386 |
| Ndnf          | chr6:65671589-65706930    | 0.0738   | 0.4781   | 2.6963  | 0.068033 |
| Ttll12        | chr15:83575118-83595157   | 12.3074  | 8.4693   | -0.5392 | 0.139771 |
| NA            | chr1:171419032-171420352  | 8.1982   | 2.6192   | -1.6462 | 0.105778 |
| Mikl          | chr8:111311796-111338177  | 1.9228   | 4.2764   | 1.1531  | 0.043306 |
| Asap2         | chr12:21111747-21270171   | 3.7520   | 2.5300   | -0.5685 | 0.001262 |
| Sorcs2        | chr5:36017179-36398139    | 2.5893   | 1.6109   | -0.6847 | 0.093413 |
| NA            | chr9:110037288-110040467  | 3.9241   | 2.0913   | -0.9080 | 0.097491 |
| Gm12178       | chr11:48289983-48290313   | 11.8029  | 2.5237   | -2.2255 | 0.249894 |
| Ccr7          | chr11:99144195-99155077   | 103.7926 | 84.2801  | -0.3004 | 0.058954 |
| Gpn3          | chr5:122371875-122382902  | 11.0722  | 16.0737  | 0.5378  | 0.036060 |
| Rnf111        | chr9:70425428-70503725    | 25.2889  | 19.1938  | -0.3979 | 0.114873 |
| Klhdc3        | chr17:46674549-46680930   | 21.0304  | 15.0672  | -0.4811 | 0.045127 |
| Gli2          | chr16:4594712-4624924     | 0.4214   | 1.3037   | 1.6295  | 0.135343 |
| Cd82          | chr2:93419110-93463140    | 102.5821 | 128.8428 | 0.3288  | 0.067075 |
| 4930481B07Rik | chr3:95015624-95020138    | 4.1134   | 1.8667   | -1.1399 | 0.015778 |
| 6330403K07Rik | chr11:71031940-71033513   | 4.6600   | 8.1174   | 0.8007  | 0.005803 |
| Thada         | chr17:84190055-84466196   | 20.7294  | 15.6390  | -0.4065 | 0.168345 |
| Mlf1          | chr3:67374096-67400003    | 0.0793   | 1.0830   | 3.7708  | 0.105008 |
| 1810037117Rik | chr3:122924361-122926193  | 17.2754  | 25.8020  | 0.5788  | 0.012727 |
| Lins          | chr7:66689888-66717256    | 2.7344   | 1.7032   | -0.6830 | 0.007969 |
| Pttg1         | chr11:43420249-43426251   | 12.3584  | 19.2041  | 0.6359  | 0.074980 |
| Smyd4         | chr11:75348432-75405705   | 2.7643   | 4.6493   | 0.7501  | 0.058406 |
| Tbc1d4        | chr14:101442359-101609191 | 33.1914  | 40.9915  | 0.3045  | 0.037765 |
| Zbtb14        | chr17:69383049-69390750   | 8.9479   | 6.2577   | -0.5159 | 0.046137 |
| Dynlrb1       | chr2:155236532-155250277  | 55.1283  | 75.7621  | 0.4587  | 0.096934 |
| Rsrp1         | chr4:134923591-134927671  | 195.2972 | 165.1672 | -0.2417 | 0.045667 |
| Fbf1          | chr11:116142284-116168166 | 4.2277   | 2.8884   | -0.5496 | 0.031201 |
| Cmtr2         | chr8:110217959-110224489  | 9.2372   | 6.4436   | -0.5196 | 0.029481 |
| 4930522L14Rik | chr5:109735989-109751886  | 4.1575   | 6.9726   | 0.7460  | 0.030846 |
| Anxa4         | chr6:86736839-86793584    | 2.4679   | 4.1285   | 0.7424  | 0.025534 |
| 2310010J17Rik | chr7:90124857-90129474    | 3.3311   | 11.8352  | 1.8290  | 0.021035 |
| Cers4         | chr8:4493025-4525757      | 7.4393   | 10.4002  | 0.4834  | 0.054874 |
| Gm1848        | chrX:21146842-21147640    | 5.2356   | 1.3720   | -1.9321 | 0.067661 |
| Pigz          | chr16:31933850-31946046   | 2.1689   | 0.7879   | -1.4608 | 0.082965 |
| Gm14446       | chr19:34592887-34601968   | 59.4152  | 84.0562  | 0.5005  | 0.135115 |
| Gm16329       | chr1:21354004-21355116    | 4.0173   | 0.1754   | -4.5174 | 0.073643 |
| Srp14         | chr2:118475849-118479711  | 46.7124  | 66.2579  | 0.5043  | 0.093462 |
| NA            | chr3:84965055-84965580    | 10.2114  | 3.7334   | -1.4516 | 0.155324 |
| Gm9776        | chr13:94355838-94358818   | 1.0115   | 0.3071   | -1.7198 | 0.001300 |
| Gtf3c2        | chr5:31151141-31180144    | 17.9139  | 13.9112  | -0.3648 | 0.101617 |
| Msi3l2        | chr10:56106916-56116880   | 3.6884   | 7.2662   | 0.9782  | 0.038960 |
| Pank3         | chr11:35769483-35791285   | 26.1182  | 20.7069  | -0.3349 | 0.094427 |
| Dkk1          | chr7:45207524-45211883    | 4.1622   | 8.4540   | 1.0223  | 0.021638 |
| Gm17137       | chr7:126164032-126168403  | 4.6501   | 2.7813   | -0.7415 | 0.094736 |
| Gm20204       | chr8:117210777-117215997  | 2.6229   | 1.5779   | -0.7331 | 0.006011 |
| Atp5e         | chr2:174461071-174464105  | 28.0972  | 43.4642  | 0.6294  | 0.167292 |
| Ccrn4l        | chr3:51224446-51251644    | 3.9575   | 2.7218   | -0.5400 | 0.074150 |
| Smpdl3b       | chr4:132732965-132757252  | 1.2817   | 4.1446   | 1.6932  | 0.015580 |
| Phkg1         | chr5:129863420-129898549  | 0.0331   | 0.3796   | 3.5181  | 0.098061 |
| Pelo          | chr13:115088356-115090188 | 10.1972  | 5.3013   | -0.9438 | 0.189150 |
| Hist1h2ah     | chr13:22035112-22035643   | 10.7797  | 22.9275  | 1.0888  | 0.098801 |
| Vamp5         | chr6:72368048-72380468    | 5.9813   | 10.3165  | 0.7864  | 0.026140 |
| Scn11a        | chr9:119753762-119825456  | 0.2276   | 0.7303   | 1.6819  | 0.036449 |
| Pik3cd        | chr4:149649167-149702571  | 91.7625  | 76.3458  | -0.2654 | 0.076964 |
| Rundc3b       | chr5:8490333-8622952      | 5.3073   | 7.9380   | 0.5808  | 0.027755 |
| Papd5         | chr8:88199212-88259722    | 23.3518  | 18.8929  | -0.3057 | 0.022263 |
| Gm15036       | chrX:49164907-49165307    | 6.5569   | 0.6302   | -3.3791 | 0.086558 |
| Nfya          | chr17:48386884-48409906   | 8.5597   | 6.7013   | -0.3531 | 0.004673 |
| Mbtd1         | chr11:93885851-93946985   | 5.8558   | 4.3956   | -0.4138 | 0.109498 |
| Trim65        | chr11:116121845-116131128 | 5.4395   | 3.7345   | -0.5426 | 0.084865 |
| Eci2          | chr13:34977747-35027094   | 11.4382  | 16.0607  | 0.4897  | 0.020366 |
| Tet3          | chr6:83362372-83441678    | 15.9857  | 12.5776  | -0.3459 | 0.102869 |

|               |                           |          |          |         |          |
|---------------|---------------------------|----------|----------|---------|----------|
| Fam129a       | chr1:151571185-151721939  | 42.0180  | 53.0169  | 0.3354  | 0.062398 |
| Pa2g4         | chr10:128557765-128565934 | 57.2585  | 43.1308  | -0.4088 | 0.162325 |
| Sipa111       | chr12:82170015-82451782   | 15.7600  | 12.5149  | -0.3326 | 0.045950 |
| Cxcl10        | chr5:92346637-92348889    | 3.2072   | 6.4854   | 1.0159  | 0.070827 |
| Trbc2         | chr6:41546729-41548181    | 641.1087 | 791.6566 | 0.3043  | 0.064722 |
| Capns1        | chr7:30186941-30195164    | 53.1926  | 65.9839  | 0.3109  | 0.024069 |
| Plekha2       | chr8:25039143-25102194    | 34.5372  | 42.7887  | 0.3091  | 0.024092 |
| Rnf128        | chrX:139563315-139673145  | 0.5540   | 1.4710   | 1.4089  | 0.085797 |
| Ipo4          | chr14:55625399-55637895   | 16.1179  | 12.6430  | -0.3503 | 0.046763 |
| Mark2         | chr19:7275395-7341860     | 16.5600  | 12.9341  | -0.3565 | 0.093267 |
| Lpxn          | chr19:12798605-12833807   | 64.8248  | 85.2464  | 0.3951  | 0.056790 |
| Wnt10a        | chr1:74791515-74804179    | 0.6947   | 0.1083   | -2.6816 | 0.014857 |
| B3galt2       | chr1:143640663-143650406  | 2.8057   | 1.3292   | -1.0778 | 0.105540 |
| Selp          | chr1:164115263-164150026  | 1.0729   | 0.4436   | -1.2742 | 0.001495 |
| Ryr3          | chr2:112631354-113217096  | 0.4541   | 0.8311   | 0.8719  | 0.087129 |
| Gm12898       | chr4:119223173-119224815  | 9.0505   | 3.8267   | -1.2419 | 0.041835 |
| Ccdc28b       | chr4:129619273-129623947  | 11.2179  | 16.5973  | 0.5652  | 0.069075 |
| Gm27022       | chr4:136347846-136349441  | 6.0315   | 1.5179   | -1.9904 | 0.041222 |
| Srm           | chr4:148591502-148594993  | 29.3088  | 19.1077  | -0.6172 | 0.172963 |
| Zfp112        | chr7:24112313-24127952    | 0.1475   | 0.7560   | 2.3572  | 0.004784 |
| NA            | chr8:109863107-109864203  | 25.9435  | 15.4891  | -0.7441 | 0.123774 |
| Gde1          | chr7:118688544-118705778  | 19.6611  | 27.4750  | 0.4828  | 0.024568 |
| Neurl2        | chr2:164830731-164833456  | 3.1642   | 0.9157   | -1.7889 | 0.040392 |
| Mat2a         | chr6:72432798-72439558    | 87.5185  | 71.1125  | -0.2995 | 0.070101 |
| Cntrob        | chr11:69299486-69323775   | 3.7147   | 5.4221   | 0.5456  | 0.025029 |
| Hist1h2bc     | chr13:23684198-23692488   | 63.4485  | 101.4817 | 0.6776  | 0.230461 |
| Tbrg4         | chr11:6615597-6626067     | 17.0405  | 12.5853  | -0.4372 | 0.100409 |
| Plekhg3       | chr12:76533559-76579039   | 0.6902   | 1.5561   | 1.1728  | 0.034842 |
| Ecm2          | chr13:49504809-49532789   | 1.0738   | 0.2445   | -2.1347 | 0.025499 |
| Asun          | chr6:146549631-146577835  | 30.7020  | 24.5817  | -0.3208 | 0.052192 |
| Knop1         | chr7:118842221-118856254  | 14.4363  | 11.4846  | -0.3300 | 0.013427 |
| Rab26         | chr17:24527240-24534210   | 1.5150   | 2.9886   | 0.9802  | 0.038628 |
| Osbp11        | chr16:33185070-33243311   | 17.1616  | 13.3686  | -0.3603 | 0.042912 |
| B3gat4        | chr1:23761752-23849158    | 7.3019   | 9.6929   | 0.4086  | 0.010614 |
| Mfsd4         | chr1:132022805-132068062  | 17.7901  | 13.9460  | -0.3512 | 0.106399 |
| Tcof1         | chr18:60813754-60848971   | 29.8067  | 23.8189  | -0.3235 | 0.079899 |
| Sec11c        | chr18:65800548-65817665   | 35.7494  | 46.0261  | 0.3645  | 0.063449 |
| Sclt1         | chr3:41626716-41742514    | 1.8481   | 3.3567   | 0.8610  | 0.043369 |
| Dnajc12       | chr10:63382442-63408840   | 0.2806   | 1.4973   | 2.4156  | 0.017855 |
| Adssl1        | chr12:112620044-112641354 | 0.1944   | 1.1099   | 2.5132  | 0.098174 |
| Gm17705       | chr17:35165118-35167186   | 0.2995   | 1.6009   | 2.4180  | 0.198599 |
| NA            | chr16:36875140-36875638   | 0.2381   | 2.1230   | 3.1562  | 0.013271 |
| Psm3          | chr12:70974620-70996347   | 13.1113  | 9.6943   | -0.4356 | 0.041718 |
| Sdad1         | chr5:92284009-92310024    | 22.4045  | 17.5996  | -0.3482 | 0.075799 |
| Galnt9        | chr5:110544344-110621382  | 3.7847   | 1.7451   | -1.1169 | 0.196728 |
| Ubn2          | chr6:38433949-38524825    | 6.3442   | 4.9202   | -0.3667 | 0.099367 |
| Qprt          | chr7:127107113-127122226  | 4.9334   | 7.5879   | 0.6211  | 0.008375 |
| Alox8         | chr11:69183931-69197843   | 2.0855   | 4.0190   | 0.9465  | 0.045051 |
| Fbxo17        | chr7:28716803-28738144    | 3.2767   | 1.5467   | -1.0830 | 0.040696 |
| Gm15283       | chr12:73926480-73949785   | 53.3874  | 69.6593  | 0.3838  | 0.042740 |
| Adamts10      | chr17:33524203-33553782   | 35.8706  | 28.0627  | -0.3541 | 0.137340 |
| D1Erd622e     | chr1:97643902-97662074    | 4.7930   | 7.0005   | 0.5465  | 0.006468 |
| Plxna3        | chrX:74329065-74344689    | 2.5371   | 1.6498   | -0.6209 | 0.040421 |
| Sdf2          | chr11:78245745-78255496   | 20.5194  | 27.9085  | 0.4437  | 0.011117 |
| C630016N16Rik | chr7:30729578-30745929    | 7.0280   | 3.3113   | -1.0857 | 0.190787 |
| Rln3          | chr8:84042928-84045000    | 17.8336  | 30.4162  | 0.7702  | 0.111981 |
| Lrif1         | chr3:106684986-106736577  | 12.2847  | 9.4733   | -0.3749 | 0.016949 |
| Nacad         | chr11:6597822-6606053     | 4.0369   | 2.6968   | -0.5820 | 0.007266 |
| Gm12743       | chr4:108592424-108619849  | 0.2814   | 0.8518   | 1.5981  | 0.002720 |
| Brix1         | chr15:10474778-10485947   | 19.0339  | 13.1860  | -0.5296 | 0.131832 |
| Phf11b        | chr14:59320963-59341335   | 38.8821  | 52.4485  | 0.4318  | 0.034920 |
| Stc2          | chr11:31357306-31370074   | 0.0249   | 0.2879   | 3.5340  | 0.116412 |
| Zfp871        | chr17:32771235-32788287   | 24.4736  | 18.7331  | -0.3856 | 0.159384 |
| Map4k3        | chr17:80580511-80728093   | 7.9195   | 5.4394   | -0.5419 | 0.081141 |
| Sdhaf2        | chr19:10500512-10525209   | 17.4328  | 22.3732  | 0.3600  | 0.003733 |
| NA            | chr10:118860825-118863542 | 10.3208  | 6.3880   | -0.6921 | 0.143136 |
| Zcchc10       | chr11:53324678-53333301   | 5.2983   | 2.3093   | -1.1981 | 0.053663 |
| Galnt10       | chr11:57645441-57787514   | 18.2231  | 14.4527  | -0.3344 | 0.082619 |
| Psm11         | chr11:80428614-80473248   | 10.9648  | 8.6042   | -0.3498 | 0.014393 |
| Heatr1        | chr13:12395397-12438677   | 39.4293  | 31.9898  | -0.3017 | 0.112717 |
| Pitpnm2       | chr5:124118689-124249760  | 9.2511   | 6.6756   | -0.4707 | 0.176379 |

|               |                           |           |           |         |          |
|---------------|---------------------------|-----------|-----------|---------|----------|
| Tmem91        | chr7:25669138-25675166    | 1.9549    | 0.9727    | -1.0070 | 0.030902 |
| Igf1r         | chr7:67952858-68226780    | 16.6068   | 11.7752   | -0.4960 | 0.138888 |
| Pgm2l1        | chr7:100227393-100278868  | 6.1138    | 4.4369    | -0.4625 | 0.027289 |
| Gm20422       | chr8:69742861-69774886    | 13.5756   | 8.4158    | -0.6898 | 0.063172 |
| Tspo          | chr15:83563572-83574201   | 40.7418   | 56.6282   | 0.4750  | 0.055297 |
| Acvrl1        | chr15:101128521-101145336 | 3.5967    | 2.1253    | -0.7590 | 0.044160 |
| Myo1f         | chr17:33555718-33607764   | 28.4488   | 37.9076   | 0.4141  | 0.114828 |
| Mettl22       | chr16:8470787-8490684     | 2.8256    | 4.8183    | 0.7700  | 0.028619 |
| Gm10814       | chr19:6012619-6018426     | 12.8366   | 8.8536    | -0.5359 | 0.029799 |
| Pip4k2a       | chr2:18842254-18998126    | 35.9553   | 28.9257   | -0.3139 | 0.068883 |
| Card9         | chr2:26352175-26360918    | 3.2547    | 1.5091    | -1.1089 | 0.121383 |
| Rpl12         | chr2:32961558-32964496    | 28.7907   | 21.5168   | -0.4201 | 0.080373 |
| Rbl1          | chr2:157145892-157204534  | 18.3503   | 23.8426   | 0.3777  | 0.106959 |
| Arfrp1        | chr2:181357689-181365404  | 21.2384   | 16.1784   | -0.3926 | 0.079194 |
| Akr1a1        | chr4:116636509-116651680  | 52.4937   | 70.0243   | 0.4157  | 0.106042 |
| Emc1          | chr4:139352586-139378730  | 19.2690   | 15.8667   | -0.2803 | 0.018018 |
| Padi1         | chr4:140812982-140845778  | 0.2850    | 0.8453    | 1.5685  | 0.047167 |
| A230059L01Rik | chr1:146802964-146806022  | 0.0532    | 0.5325    | 3.3224  | 0.116950 |
| Fam65b        | chr13:24582188-24733816   | 47.3195   | 40.4812   | -0.2252 | 0.032392 |
| Airn          | chr17:12741310-12860122   | 4.2060    | 2.3974    | -0.8110 | 0.070776 |
| Chd4          | chr6:125095980-125130591  | 111.3412  | 93.7395   | -0.2483 | 0.102079 |
| Dbf4          | chr5:8396972-8422716      | 7.8655    | 10.8482   | 0.4638  | 0.067555 |
| Zfp607        | chr7:27862556-27879567    | 19.2093   | 13.5679   | -0.5016 | 0.087939 |
| Tlcd2         | chr11:75461714-75470899   | 1.2238    | 3.1690    | 1.3727  | 0.076311 |
| Gm15879       | chr16:4032838-4037847     | 5.8140    | 2.4413    | -1.2519 | 0.065843 |
| B2m           | chr2:122147685-122153083  | 2938.8161 | 3598.9873 | 0.2924  | 0.101079 |
| Pofut1        | chr2:153241532-153270247  | 11.6997   | 9.6974    | -0.2708 | 0.002733 |
| Gm5533        | chr1:181851573-181853189  | 0.1087    | 0.8324    | 2.9375  | 0.004817 |
| Akip1         | chr7:109703689-109712189  | 5.3975    | 9.6772    | 0.8423  | 0.020057 |
| Psmb4         | chr3:94884092-94886961    | 76.4293   | 98.2564   | 0.3624  | 0.053069 |
| Clpx          | chr9:65294259-65330658    | 17.0219   | 13.4104   | -0.3440 | 0.002818 |
| Cd9           | chr6:125460265-125494791  | 15.1265   | 10.7921   | -0.4871 | 0.028239 |
| Pdpk1         | chr17:24073679-24150924   | 20.1337   | 17.2320   | -0.2245 | 0.000045 |
| Amigo2        | chr15:97244073-97247287   | 6.2104    | 4.0614    | -0.6127 | 0.005161 |
| Rragc         | chr4:123917445-123936997  | 20.2742   | 16.0422   | -0.3378 | 0.016267 |
| Cd109         | chr9:78615545-78716253    | 0.2726    | 1.0306    | 1.9184  | 0.132604 |
| Pcnx13        | chr19:5664634-5688908     | 15.9836   | 11.5705   | -0.4661 | 0.202911 |
| Gm12276       | chr11:62331420-62331721   | 23.4302   | 10.1560   | -1.2060 | 0.098951 |
| Sp6           | chr11:97013393-97024734   | 6.7598    | 4.3583    | -0.6332 | 0.090915 |
| Usp11         | chrX:20703905-20720539    | 3.4961    | 5.1870    | 0.5692  | 0.032515 |
| Traj15        | chr14:54204421-54204481   | 145.6409  | 65.0342   | -1.1631 | 0.194000 |
| Gm14124       | chr2:150257516-150270300  | 1.0299    | 0.2782    | -1.8885 | 0.017330 |
| Clta          | chr4:44004451-44032846    | 68.7550   | 86.3883   | 0.3294  | 0.053833 |
| Atcay         | chr10:81204507-81230833   | 4.0041    | 6.1635    | 0.6223  | 0.056620 |
| BC004004      | chr17:29268787-29302881   | 10.0356   | 13.0347   | 0.3772  | 0.019362 |
| Bub1          | chr2:127801121-127831865  | 5.1788    | 8.4281    | 0.7026  | 0.103300 |
| Gm15472       | chr3:103863165-103864423  | 10.1236   | 4.9368    | -1.0361 | 0.089363 |
| Kcna2         | chr3:107101566-107106879  | 0.3761    | 1.0360    | 1.4618  | 0.008245 |
| Snrnp40       | chr4:130360131-130390026  | 24.3391   | 19.8117   | -0.2969 | 0.016014 |
| Zscan18       | chr7:12768091-12775658    | 0.0825    | 0.5576    | 2.7560  | 0.038393 |
| A830012C17Rik | chr4:4138320-4188703      | 0.4313    | 1.9339    | 2.1648  | 0.024913 |
| Vps54         | chr11:21239280-21321136   | 51.4357   | 64.1605   | 0.3189  | 0.110824 |
| Gm24853       | chr12:81501239-81501360   | 42.7224   | 17.0120   | -1.3284 | 0.122615 |
| Gm15135       | chr7:104261464-104262174  | 32.2781   | 49.8651   | 0.6275  | 0.078323 |
| Xylt1         | chr7:117380978-117667751  | 1.5499    | 2.8010    | 0.8538  | 0.036216 |
| Evi5l         | chr8:4166566-4211257      | 1.4221    | 2.2825    | 0.6826  | 0.067452 |
| Prcc2a        | chr17:35149075-35164897   | 28.0318   | 20.7124   | -0.4366 | 0.225191 |
| Gm22345       | chr4:108537490-108537597  | 12.5321   | 1.5632    | -3.0030 | 0.043431 |
| Ipo13         | chr4:117894485-117914999  | 4.9543    | 3.2577    | -0.6048 | 0.030513 |
| Gm12867       | chr4:119130291-119131001  | 3.4494    | 0.5760    | -2.5821 | 0.003939 |
| Cherp         | chr8:72460488-72475233    | 10.4462   | 7.2005    | -0.5368 | 0.122684 |
| NA            | chr5:136345883-136350231  | 1.7768    | 0.6876    | -1.3696 | 0.157988 |
| St5           | chr7:109523910-109617147  | 3.1632    | 1.8321    | -0.7879 | 0.076272 |
| Nlrp1a        | chr11:71092235-71144704   | 0.0835    | 0.4840    | 2.5346  | 0.035313 |
| Fbxo5         | chr10:5799159-5805600     | 11.2987   | 18.5486   | 0.7152  | 0.107824 |
| Rexo1         | chr10:80540921-80561560   | 10.3115   | 7.4216    | -0.4745 | 0.146016 |
| Afmid         | chr11:117825923-117839908 | 6.6542    | 9.4466    | 0.5055  | 0.013590 |
| Xrcc3         | chr12:111803191-111813873 | 2.2202    | 3.9660    | 0.8370  | 0.021345 |
| Ighm          | chr12:113418949-113422730 | 426.5865  | 557.7485  | 0.3868  | 0.217924 |
| Abcf2         | chr5:24565340-24577467    | 49.3629   | 39.8735   | -0.3080 | 0.077830 |
| Eif3b         | chr5:140419304-140443358  | 68.2714   | 56.1792   | -0.2812 | 0.073308 |



|               |                           |          |          |         |          |
|---------------|---------------------------|----------|----------|---------|----------|
| Ankrd26       | chr6:118502563-118562256  | 6.9588   | 5.0731   | -0.4560 | 0.028505 |
| Lrp6          | chr6:134446475-134566965  | 14.5810  | 11.8913  | -0.2942 | 0.056555 |
| Sugp2         | chr8:70234225-70279915    | 9.2546   | 7.6318   | -0.2781 | 0.032064 |
| Tle3          | chr9:61372365-61418497    | 25.0651  | 19.4706  | -0.3644 | 0.151293 |
| NA            | chr9:88438597-88441187    | 3.9102   | 1.8523   | -1.0780 | 0.167765 |
| Sepp1         | chr15:3268546-3280508     | 51.5173  | 67.4178  | 0.3881  | 0.105132 |
| Cby1          | chr15:79659226-79667660   | 5.0723   | 8.9571   | 0.8204  | 0.013467 |
| Brd1          | chr15:88687299-88734233   | 18.6683  | 15.2789  | -0.2890 | 0.058800 |
| Trav8-2       | chr14:53738301-53741038   | 2.6087   | 1.2165   | -1.1006 | 0.009147 |
| Micu2         | chr14:57916279-57999262   | 39.7943  | 50.9472  | 0.3564  | 0.039736 |
| Birc6         | chr17:74528294-74703773   | 38.3638  | 32.7939  | -0.2263 | 0.072185 |
| Ms4a6d        | chr19:11586603-11604849   | 1.6212   | 3.6930   | 1.1877  | 0.020262 |
| Nolc1         | chr19:46075862-46085528   | 40.2295  | 31.7444  | -0.3418 | 0.127648 |
| Frmf5         | chr2:121545528-121807087  | 0.9278   | 1.9235   | 1.0518  | 0.083051 |
| Naa20         | chr2:145902098-145916425  | 12.1470  | 16.8209  | 0.4697  | 0.052193 |
| Gid8          | chr2:180710116-180718733  | 15.6938  | 21.3532  | 0.4443  | 0.038179 |
| Nexn          | chr3:152236985-152266320  | 3.3493   | 1.6020   | -1.0640 | 0.015597 |
| Clcn6         | chr4:148004258-148038821  | 4.7570   | 2.8764   | -0.7258 | 0.199745 |
| Ighj3         | chr12:113429084-113429132 | 13.2577  | 47.1666  | 1.8309  | 0.060911 |
| Zfp11         | chr5:129654592-129670099  | 2.9299   | 1.7948   | -0.7071 | 0.001476 |
| Eftud2        | chr11:102838472-102880985 | 18.6691  | 15.1980  | -0.2968 | 0.080828 |
| Polr3e        | chr7:120917743-120947432  | 21.2796  | 16.1072  | -0.4018 | 0.099642 |
| Gm8818        | chr1:153305431-153306478  | 0.4896   | 2.8452   | 2.5389  | 0.075992 |
| Gm20682       | chr12:99292607-99296620   | 1.3443   | 0.5296   | -1.3439 | 0.068890 |
| Znhit2        | chr19:6061191-6062470     | 8.4583   | 13.4409  | 0.6682  | 0.046489 |
| Pde4dip       | chr3:97689823-97888707    | 3.6791   | 5.1197   | 0.4767  | 0.092026 |
| Tmem255a      | chrX:38196572-38252439    | 1.5771   | 0.8245   | -0.9357 | 0.001249 |
| Cabp7         | chr11:4736891-4746778     | 2.4928   | 4.5360   | 0.8636  | 0.030936 |
| Thap2         | chr10:115369965-115384435 | 8.2077   | 5.8649   | -0.4849 | 0.014637 |
| Gm24336       | chr19:44113978-44114124   | 54.9591  | 96.8122  | 0.8168  | 0.143230 |
| Tmx4          | chr2:134594184-134644145  | 5.3323   | 6.8789   | 0.3674  | 0.025434 |
| Pifo          | chr3:105996956-106014646  | 3.1122   | 0.6629   | -2.2311 | 0.137988 |
| Rps13-ps2     | chr7:88530404-88530925    | 39.8188  | 60.6153  | 0.6062  | 0.083109 |
| 2410006H16Rik | chr11:62602876-62604807   | 96.9070  | 129.3847 | 0.4170  | 0.037366 |
| Kbtbd2        | chr6:56777523-56797813    | 33.5494  | 27.5504  | -0.2842 | 0.049669 |
| Utf1          | chr7:139943788-139945112  | 2.0383   | 0.4083   | -2.3196 | 0.106917 |
| Preli2        | chr18:41875695-41951194   | 8.8678   | 15.5947  | 0.8144  | 0.035460 |
| Cwc22         | chr2:77881158-77946375    | 10.6013  | 8.5199   | -0.3153 | 0.011060 |
| Gm16023       | chr4:155608299-155624755  | 8.3011   | 5.5878   | -0.5710 | 0.051810 |
| Fancd2        | chr6:113531681-113597017  | 2.4968   | 3.6484   | 0.5472  | 0.056566 |
| Crebbp        | chr16:4084047-4213404     | 26.4839  | 20.1293  | -0.3958 | 0.206000 |
| Gm13561       | chr2:62357070-62470913    | 0.3720   | 1.5150   | 2.0258  | 0.020041 |
| Gopc          | chr10:52337023-52382124   | 13.5540  | 10.5577  | -0.3604 | 0.030400 |
| Plaur         | chr7:24462499-24475873    | 2.1052   | 0.4917   | -2.0982 | 0.032507 |
| Ppan          | chr9:20888174-20892178    | 35.0038  | 27.8766  | -0.3285 | 0.045950 |
| Anln          | chr9:22331213-22389206    | 3.7882   | 5.5560   | 0.5525  | 0.056777 |
| Chic1         | chrX:103356475-103396092  | 0.7290   | 1.4041   | 0.9456  | 0.073613 |
| Huwe1         | chrX:151800806-151935417  | 35.0874  | 28.4437  | -0.3028 | 0.186463 |
| Tmbim1        | chr1:74288246-74305622    | 2.3168   | 3.1808   | 0.4573  | 0.015903 |
| Myh7b         | chr2:155611211-155634307  | 0.8214   | 0.3954   | -1.0549 | 0.000388 |
| mt-Nd2        | chrM:3913-4951            | 58.0414  | 39.9919  | -0.5374 | 0.159774 |
| Ralgps1       | chr2:33133420-33371486    | 3.5656   | 2.3502   | -0.6013 | 0.114620 |
| Fgfbp3        | chr19:36917549-36919615   | 0.0762   | 0.6125   | 3.0077  | 0.008416 |
| Lrp5          | chr19:3584827-3686564     | 0.7770   | 0.3953   | -0.9749 | 0.049715 |
| Pdcd1         | chr1:94038306-94052553    | 53.3360  | 69.9309  | 0.3908  | 0.094149 |
| B4galnt1      | chr10:127165155-127172340 | 158.0357 | 132.0667 | -0.2590 | 0.093217 |
| Prpf8         | chr11:75486815-75509449   | 95.5296  | 82.8510  | -0.2054 | 0.031056 |
| Sbno1         | chr5:124368701-124425914  | 38.6530  | 32.9235  | -0.2315 | 0.028890 |
| Gapdhs        | chr7:30729774-30743681    | 4.0575   | 1.8290   | -1.1496 | 0.080182 |
| Gng5          | chr3:146499833-146505572  | 10.2279  | 14.9069  | 0.5435  | 0.059092 |
| Aknaos        | chr4:63381357-63394018    | 23.2402  | 14.9826  | -0.6333 | 0.124114 |
| Mecr          | chr4:131843469-131867786  | 7.6928   | 5.2392   | -0.5542 | 0.056420 |
| Ppm1h         | chr10:122678761-122945795 | 15.2469  | 12.0615  | -0.3381 | 0.139175 |
| Tmem123       | chr9:7764040-7794333      | 65.3721  | 80.8976  | 0.3074  | 0.063173 |
| D030055H07Rik | chr9:106148686-106160201  | 1.3553   | 2.2771   | 0.7486  | 0.031558 |
| Parp9         | chr16:35938469-35972605   | 44.3075  | 55.6768  | 0.3295  | 0.079053 |
| Gm6969        | chr12:24638668-24639010   | 0.3747   | 3.5443   | 3.2417  | 0.059005 |
| Pfas          | chr11:68985696-69008460   | 16.6347  | 13.1648  | -0.3375 | 0.117299 |
| Telo2         | chr17:25099569-25115967   | 6.4272   | 4.9389   | -0.3800 | 0.028853 |
| Gnpda2        | chr5:69573107-69592337    | 6.7115   | 9.5541   | 0.5095  | 0.089698 |
| Ptpn18        | chr1:34459745-34473775    | 64.5262  | 89.0246  | 0.4643  | 0.183582 |

|           |                           |          |          |         |          |
|-----------|---------------------------|----------|----------|---------|----------|
| Manf      | chr9:106838311-106891979  | 18.1199  | 23.7716  | 0.3917  | 0.048814 |
| Wdr46     | chr17:33940659-33949695   | 28.4765  | 20.9484  | -0.4429 | 0.141581 |
| Gm11532   | chr11:97020507-97026248   | 5.2051   | 3.4937   | -0.5752 | 0.086923 |
| Prpf39    | chr12:65036332-65063386   | 44.7354  | 36.7166  | -0.2850 | 0.079138 |
| Slc6a6    | chr6:91684066-91759063    | 23.5763  | 19.3741  | -0.2832 | 0.054191 |
| Gm24757   | chr7:30311524-30311895    | 6.5955   | 14.1987  | 1.1062  | 0.019587 |
| Ei24      | chr9:36779158-36797393    | 21.5368  | 28.3425  | 0.3962  | 0.041407 |
| Nt5e      | chr9:88327608-88372089    | 116.0600 | 141.4886 | 0.2858  | 0.066723 |
| Bbs1      | chr19:4886897-4906627     | 0.8946   | 0.3462   | -1.3694 | 0.159384 |
| Gm13703   | chr2:73357267-73364333    | 6.2091   | 1.3967   | -2.1524 | 0.043773 |
| Lyn       | chr4:3678114-3813122      | 1.2428   | 2.3125   | 0.8959  | 0.022955 |
| Pdik1l    | chr4:134275001-134287895  | 8.7568   | 11.3607  | 0.3756  | 0.030591 |
| Dhrs3     | chr4:144892826-144928209  | 3.0884   | 5.1745   | 0.7446  | 0.119489 |
| Gm15063   | chrX:75573451-75575268    | 2.0000   | 4.8666   | 1.2829  | 0.053839 |
| Vamp8     | chr6:72385222-72390703    | 33.1992  | 44.1095  | 0.4099  | 0.105177 |
| Nxt1      | chr2:148672600-148676027  | 11.3973  | 20.0512  | 0.8150  | 0.085250 |
| Gstk1     | chr6:42245934-42250441    | 5.6848   | 2.4808   | -1.1963 | 0.015747 |
| Utrn      | chr10:12382187-12861735   | 99.9214  | 84.2684  | -0.2458 | 0.112591 |
| Txlnb     | chr10:17796225-17845665   | 0.3403   | 0.8885   | 1.3845  | 0.049688 |
| Sf3a2     | chr10:80798197-80804924   | 11.6395  | 8.0025   | -0.5405 | 0.101259 |
| Rufy1     | chr11:50389285-50431125   | 14.4227  | 10.6946  | -0.4315 | 0.030691 |
| Gm11521   | chr11:95336010-95337408   | 8.2756   | 2.2774   | -1.8615 | 0.135468 |
| Ubqln1    | chr13:58176155-58215653   | 51.8692  | 42.1732  | -0.2986 | 0.107544 |
| Hmgcr     | chr13:96648966-96670936   | 35.0628  | 29.3808  | -0.2551 | 0.044131 |
| Psmc7     | chr8:107580380-107588482  | 35.7939  | 26.9303  | -0.4105 | 0.079429 |
| Urb2      | chr8:124021507-124048505  | 17.0915  | 13.8203  | -0.3065 | 0.052555 |
| Neo1      | chr9:58874678-59036441    | 0.2917   | 0.0729   | -2.0006 | 0.083684 |
| Gm2245    | chr15:6604340-6654303     | 15.0374  | 10.7718  | -0.4813 | 0.115524 |
| Sec24c    | chr14:20674320-20694850   | 59.6011  | 49.5266  | -0.2671 | 0.111256 |
| Dhrs4     | chr14:55478757-55490338   | 8.5135   | 13.0963  | 0.6213  | 0.015888 |
| Rab11fip3 | chr17:25989035-26069409   | 3.9756   | 2.7080   | -0.5540 | 0.070927 |
| B3galt4   | chr17:33949913-33951488   | 8.7170   | 12.9730  | 0.5736  | 0.016793 |
| Adprh     | chr16:38445398-38452689   | 24.0372  | 33.0330  | 0.4586  | 0.069514 |
| Slc43a3   | chr2:84936578-84958509    | 5.3250   | 7.6619   | 0.5249  | 0.067595 |
| Casc5     | chr2:119047118-119105501  | 6.3110   | 8.8722   | 0.4914  | 0.183608 |
| Gm25445   | chr4:53720901-53721200    | 7.7410   | 2.0168   | -1.9405 | 0.078150 |
| Gm3468    | chr14:6020653-6108665     | 0.3432   | 1.7531   | 2.3526  | 0.060645 |
| Arhgap24  | chr5:102481390-102897936  | 0.0421   | 0.2404   | 2.5117  | 0.157988 |
| Pitpnm3   | chr11:72047527-72135778   | 0.0112   | 0.1121   | 3.3233  | 0.069911 |
| Scg2      | chr1:79434668-79440090    | 0.1127   | 0.6816   | 2.5966  | 0.163119 |
| Nrbf2     | chr10:67266688-67285305   | 1.8527   | 3.9089   | 1.0772  | 0.018007 |
| Dnajc9    | chr14:20384637-20388910   | 53.8226  | 71.2416  | 0.4045  | 0.076155 |
| Atad3a    | chr4:155740640-155761093  | 20.6852  | 15.2401  | -0.4407 | 0.164641 |
| NA        | chr1:143605161-143606608  | 7.0773   | 3.3298   | -1.0878 | 0.263159 |
| Eif2b5    | chr16:20498816-20509955   | 36.8354  | 29.7216  | -0.3096 | 0.083122 |
| Atg16l1   | chr1:87755869-87792428    | 14.4158  | 11.6480  | -0.3076 | 0.091377 |
| Zfp938    | chr10:82224849-82241280   | 4.4332   | 7.4475   | 0.7484  | 0.049479 |
| Tmbim4    | chr10:120201589-120224917 | 7.3021   | 11.3493  | 0.6362  | 0.124923 |
| Snord104  | chr11:106500992-106501062 | 92.7832  | 46.8535  | -0.9857 | 0.004055 |
| NA        | chr13:104173721-104178439 | 8.5697   | 13.0364  | 0.6052  | 0.035523 |
| Scfd2     | chr5:74204815-74531747    | 2.2494   | 3.3324   | 0.5670  | 0.047067 |
| Gprin3    | chr6:59352460-59426290    | 16.3041  | 22.9907  | 0.4958  | 0.096146 |
| Tmem219   | chr7:126886170-126922917  | 5.3771   | 8.4003   | 0.6436  | 0.041483 |
| Rab3d     | chr9:21907490-21918192    | 2.0173   | 3.2494   | 0.6878  | 0.022573 |
| Cxcr5     | chr9:44511787-44556391    | 29.1347  | 39.5705  | 0.4417  | 0.156809 |
| Enox2     | chrX:49009706-49288259    | 4.3199   | 6.3413   | 0.5538  | 0.030658 |
| Brwd3     | chrX:108737015-108834372  | 5.1516   | 3.7732   | -0.4492 | 0.154639 |
| Sntb1     | chr15:55638842-55906949   | 17.2215  | 22.2491  | 0.3695  | 0.017877 |
| Gramd4    | chr15:86057694-86137634   | 35.3658  | 29.8454  | -0.2448 | 0.028784 |
| Fut11     | chr14:20694967-20700197   | 6.1609   | 8.6210   | 0.4847  | 0.012137 |
| Nek4      | chr14:30951485-30987439   | 8.5967   | 6.0366   | -0.5100 | 0.017813 |
| Slx4      | chr16:3979104-4003770     | 9.0881   | 6.7067   | -0.4384 | 0.149379 |
| Dcp2      | chr18:44380499-44424969   | 18.3836  | 15.4409  | -0.2517 | 0.010226 |
| Gbp7      | chr3:142530337-142550083  | 67.8444  | 81.7280  | 0.2686  | 0.042696 |
| Fsd1l     | chr4:53631470-53707009    | 1.4363   | 0.8161   | -0.8156 | 0.181203 |
| Txndc12   | chr4:108834600-108862127  | 14.6792  | 21.4699  | 0.5485  | 0.090552 |
| Gm15530   | chr16:38685314-38685869   | 0.7948   | 3.8119   | 2.2619  | 0.119911 |
| Gm14320   | chr2:167662108-167667697  | 0.1045   | 1.0425   | 3.3189  | 0.025869 |
| Myo19     | chr11:84880147-84911226   | 2.9473   | 1.9639   | -0.5857 | 0.062899 |
| Dqx1      | chr6:83057843-83067210    | 4.6039   | 2.6559   | -0.7936 | 0.114553 |
| Timm44    | chr8:4259730-4275913      | 21.6805  | 17.5961  | -0.3011 | 0.008076 |

|               |                           |          |          |         |          |
|---------------|---------------------------|----------|----------|---------|----------|
| Snapc5        | chr9:64179296-64182684    | 23.8287  | 34.3114  | 0.5260  | 0.012691 |
| Rad51c        | chr11:87376644-87404954   | 0.2367   | 0.8548   | 1.8523  | 0.037645 |
| Egln3         | chr12:54178980-54203860   | 2.2431   | 5.2052   | 1.2144  | 0.035725 |
| Frg1          | chr8:41397456-41417118    | 53.0481  | 74.4154  | 0.4883  | 0.142454 |
| Rpl17-ps5     | chr5:22612590-22613217    | 0.2608   | 2.2063   | 3.0805  | 0.108721 |
| Dolpp1        | chr2:30392253-30400529    | 5.7224   | 8.1100   | 0.5031  | 0.013030 |
| Gm2a          | chr11:55098114-55113029   | 36.5225  | 46.2105  | 0.3394  | 0.119381 |
| Prpf4b        | chr13:34875493-34902877   | 89.1134  | 73.7436  | -0.2731 | 0.135546 |
| Gbp6          | chr5:105270703-105293699  | 17.9233  | 24.8375  | 0.4707  | 0.157161 |
| Arpc3         | chr5:122391877-122406179  | 66.5429  | 83.5871  | 0.3290  | 0.087233 |
| Tmem9b        | chr7:109735833-109752875  | 25.7447  | 33.4030  | 0.3757  | 0.029522 |
| Slc25a4       | chr8:46206796-46211284    | 41.1065  | 55.4810  | 0.4326  | 0.100287 |
| Man2b1        | chr8:85083268-85098739    | 49.5849  | 41.1824  | -0.2679 | 0.084114 |
| Ccr4          | chr9:114490315-114496544  | 28.8847  | 37.4829  | 0.3759  | 0.066333 |
| Pdcd11        | chr19:47090765-47131143   | 27.0907  | 22.3736  | -0.2760 | 0.080431 |
| Shoc2         | chr19:53944305-54033268   | 21.5409  | 27.3633  | 0.3452  | 0.073771 |
| Pex16         | chr2:92374675-92381217    | 11.9667  | 17.3228  | 0.5336  | 0.053446 |
| Cenpb         | chr2:131177290-131180012  | 24.7877  | 31.9828  | 0.3677  | 0.078882 |
| Gm20707       | chr4:147782318-147809840  | 2.5075   | 4.7922   | 0.9344  | 0.044597 |
| Zfp651        | chr9:121760032-121771742  | 0.0206   | 0.1835   | 3.1541  | 0.099957 |
| Ugt1a6b       | chr1:88103251-88219003    | 0.0270   | 0.4019   | 3.8962  | 0.119126 |
| 9330175E14Rik | chr8:94422898-94435105    | 10.7757  | 8.0190   | -0.4263 | 0.171924 |
| Il4           | chr11:53602981-53618669   | 0.1741   | 1.3260   | 2.9289  | 0.099656 |
| Dnajc7        | chr11:100582817-100620168 | 43.0166  | 36.7337  | -0.2278 | 0.012722 |
| Hist1h2ac     | chr13:23681466-23683948   | 6.1163   | 10.1694  | 0.7335  | 0.173691 |
| Sfxn1         | chr13:54071844-54108346   | 30.0443  | 24.4126  | -0.2995 | 0.027488 |
| Ice1          | chr13:70588688-70637634   | 26.1703  | 21.6607  | -0.2728 | 0.102130 |
| Sept11        | chr5:93093456-93174958    | 29.2663  | 24.3124  | -0.2675 | 0.054975 |
| Arhgap35      | chr7:16494472-16614993    | 7.4330   | 5.7547   | -0.3692 | 0.062517 |
| Stk32c        | chr7:139103637-139213307  | 1.4505   | 3.1278   | 1.1086  | 0.144328 |
| Trappc4       | chr9:44403760-44407548    | 24.7394  | 33.2633  | 0.4271  | 0.018258 |
| Cetn2         | chrX:72913531-72918411    | 14.8647  | 23.2772  | 0.6470  | 0.159667 |
| Ypel5         | chr17:72836703-72851195   | 19.7155  | 24.6333  | 0.3213  | 0.000262 |
| Cep97         | chr16:55899887-55934855   | 15.4265  | 12.7652  | -0.2732 | 0.032989 |
| Nmrk1         | chr19:18631949-18652194   | 2.2218   | 1.1367   | -0.9669 | 0.032793 |
| Hps6          | chr19:46003477-46006173   | 5.4917   | 8.0852   | 0.5580  | 0.032560 |
| Ino80d        | chr1:62958417-63114667    | 12.0824  | 9.7120   | -0.3151 | 0.125994 |
| Atp1b1        | chr1:164437266-164458355  | 8.0449   | 5.4041   | -0.5740 | 0.046064 |
| Diap1         | chr18:37843600-37935476   | 23.6554  | 19.1014  | -0.3085 | 0.134005 |
| Ehmt1         | chr2:24790768-24919609    | 15.9376  | 13.2126  | -0.2705 | 0.018981 |
| Cep152        | chr2:125563087-125625113  | 11.6040  | 9.1383   | -0.3446 | 0.065122 |
| Rps10-ps1     | chr3:95622277-95622775    | 8.9630   | 17.0642  | 0.9289  | 0.025267 |
| Trav7d-4      | chr14:52769752-52770390   | 0.2379   | 2.3565   | 3.3083  | 0.020093 |
| Zfp324        | chr7:12965837-12974236    | 7.5350   | 4.8889   | -0.6241 | 0.252272 |
| Gse1          | chr8:120230535-120581390  | 7.3259   | 5.3976   | -0.4407 | 0.105238 |
| Tsc22d1       | chr14:76414960-76507765   | 4.0213   | 2.9017   | -0.4708 | 0.071118 |
| Tmem44        | chr16:30511854-30550842   | 0.2393   | 0.0714   | -1.7445 | 0.007232 |
| Peo1          | chr19:45006557-45012762   | 7.7180   | 5.4270   | -0.5081 | 0.037845 |
| Cd48          | chr1:171682008-171705258  | 163.4696 | 203.0283 | 0.3127  | 0.097081 |
| Trim44        | chr2:102300118-102407828  | 25.6955  | 21.8040  | -0.2369 | 0.000892 |
| Polr1b        | chr2:129100994-129126594  | 16.6915  | 12.3616  | -0.4332 | 0.214082 |
| Csrp2bp       | chr2:144368982-144407676  | 12.3088  | 9.5826   | -0.3612 | 0.028176 |
| Gm24041       | chr15:58819322-58819478   | 3.7290   | 16.7306  | 2.1656  | 0.068944 |
| Grb2          | chr11:115644044-115708597 | 14.5566  | 19.3612  | 0.4115  | 0.060432 |
| Il9r          | chr11:32187540-32200279   | 5.1182   | 7.0848   | 0.4691  | 0.045589 |
| Pla2g16       | chr19:7557458-7588545     | 12.1131  | 15.6048  | 0.3654  | 0.079999 |
| Zmat5         | chr11:4704677-4737669     | 8.6049   | 15.2435  | 0.8250  | 0.110991 |
| D430018E03Rik | chr5:142874076-142878373  | 0.9146   | 0.2690   | -1.7656 | 0.151343 |
| Osbp13        | chr6:50293329-50456201    | 10.6953  | 14.9337  | 0.4816  | 0.157297 |
| Hcst          | chr7:30417716-30419854    | 55.6993  | 80.0011  | 0.5224  | 0.069373 |
| Zfp809        | chr9:22225713-22243197    | 24.4934  | 17.8732  | -0.4546 | 0.034302 |
| Kcnk5         | chr14:20140057-20181782   | 2.1118   | 3.7993   | 0.8473  | 0.094383 |
| Mapk8ip3      | chr17:24892152-24936977   | 16.9718  | 13.8097  | -0.2975 | 0.149309 |
| Capn15        | chr17:25959555-25985680   | 6.1998   | 3.9359   | -0.6555 | 0.103536 |
| Qtrtd1        | chr16:43861406-43926809   | 11.0293  | 8.5496   | -0.3674 | 0.033784 |
| Rftn2         | chr1:55170158-55226782    | 0.9734   | 1.7069   | 0.8102  | 0.026150 |
| Tor1aip2      | chr1:156035402-156068861  | 16.9646  | 14.0948  | -0.2674 | 0.062515 |
| Ttc30a1       | chr2:75979105-75981967    | 0.8908   | 1.9746   | 1.1485  | 0.087216 |
| Mfn1          | chr3:32529464-32579239    | 4.4094   | 6.0487   | 0.4560  | 0.029535 |
| Notch2        | chr3:98013537-98150367    | 20.7756  | 16.7621  | -0.3097 | 0.158956 |
| Cttnal1       | chr4:56810934-56865188    | 0.7517   | 0.3573   | -1.0728 | 0.008037 |

|               |                           |          |          |         |          |
|---------------|---------------------------|----------|----------|---------|----------|
| Col14a1       | chr15:55307749-55520803   | 0.1689   | 0.0123   | -3.7828 | 0.097903 |
| Gm22435       | chrX:68684147-68684275    | 0.8342   | 9.9626   | 3.5781  | 0.191941 |
| NA            | chr4:91805348-91806561    | 4.5846   | 2.2936   | -0.9992 | 0.001268 |
| Ccl5          | chr11:83525777-83530518   | 3.7722   | 10.1128  | 1.4227  | 0.032684 |
| Lat2          | chr5:134600267-134615023  | 2.9932   | 5.8478   | 0.9662  | 0.084796 |
| Cox6a1        | chr5:115345641-115348981  | 80.0485  | 107.4915 | 0.4253  | 0.110653 |
| Fam3b         | chr16:97471049-97504936   | 0.1090   | 0.9130   | 3.0657  | 0.036756 |
| ltga6         | chr2:71745615-71858416    | 40.8083  | 34.8076  | -0.2295 | 0.056379 |
| Zfp287        | chr11:62700355-62731905   | 4.6570   | 6.2381   | 0.4217  | 0.047286 |
| Eif4ebp2      | chr10:61432496-61452669   | 17.4039  | 12.2209  | -0.5101 | 0.086988 |
| Med13l        | chr5:118560718-118765435  | 16.2524  | 12.9052  | -0.3327 | 0.153355 |
| Ppfi4         | chr1:134296782-134332928  | 0.2333   | 0.0452   | -2.3674 | 0.023051 |
| Tmppe         | chr9:114401094-114411200  | 8.5575   | 6.4550   | -0.4068 | 0.139582 |
| Cr1l          | chr1:195103788-195131570  | 41.9688  | 52.3878  | 0.3199  | 0.012273 |
| 4930556J24Rik | chr11:3937540-3976778     | 8.0460   | 4.6192   | -0.8007 | 0.017031 |
| Gen1          | chr12:11240925-11265787   | 2.6135   | 4.1196   | 0.6565  | 0.015260 |
| Asb13         | chr13:3634031-3651774     | 12.3933  | 9.4006   | -0.3987 | 0.032461 |
| Rad18         | chr6:112619849-112696686  | 5.2487   | 7.1420   | 0.4444  | 0.029470 |
| Usp18         | chr6:121245905-121270916  | 21.8601  | 32.4774  | 0.5711  | 0.163715 |
| Nop2          | chr6:125131882-125144753  | 50.0130  | 39.7109  | -0.3328 | 0.150672 |
| Arl2bp        | chr8:94666754-94674417    | 43.8838  | 56.4369  | 0.3630  | 0.087221 |
| Ska3          | chr14:57806560-57826163   | 2.9789   | 5.4088   | 0.8605  | 0.061922 |
| Ndufv3        | chr17:31520114-31531321   | 26.9689  | 39.1240  | 0.5368  | 0.151802 |
| B3galt5       | chr16:96235800-96319859   | 0.1168   | 0.4201   | 1.8462  | 0.129603 |
| Mir1955       | chr2:92191976-92192074    | 17.5343  | 3.6324   | -2.2712 | 0.079728 |
| Rsb1          | chr3:103914119-103966636  | 25.9549  | 21.7600  | -0.2543 | 0.033345 |
| Pgd           | chr4:149149900-149166771  | 9.1270   | 6.9852   | -0.3858 | 0.075217 |
| 6330403N20Rik | chr7:80297727-80299616    | 0.2336   | 1.5499   | 2.7303  | 0.115964 |
| Ifitm5        | chr7:140948962-140950239  | 0.7905   | 3.6547   | 2.2089  | 0.219796 |
| Gm22488       | chr15:58146615-58146742   | 9.1549   | 0.8334   | -3.4574 | 0.107391 |
| Fam213b       | chr4:154895503-154899135  | 0.1593   | 1.2274   | 2.9461  | 0.006790 |
| Hist1h2ab     | chr13:23751087-23751593   | 45.1207  | 72.8520  | 0.6912  | 0.220876 |
| Mical3        | chr8:120931706-121003153  | 2.3531   | 1.2484   | -0.9145 | 0.278231 |
| Gsr           | chr8:33652522-33698163    | 16.7657  | 22.2033  | 0.4053  | 0.043969 |
| Slc36a4       | chr9:15709737-15742384    | 3.2617   | 5.1109   | 0.6480  | 0.097685 |
| Crtap         | chr9:114375133-114390675  | 8.6489   | 5.3304   | -0.6983 | 0.055592 |
| Nckap5l       | chr15:99422034-99457748   | 3.8386   | 2.3519   | -0.7067 | 0.075287 |
| Focad         | chr4:88094628-88411011    | 4.9992   | 3.8629   | -0.3720 | 0.063342 |
| Tuba8         | chr6:121210733-121226854  | 0.1854   | 0.8635   | 2.2194  | 0.024606 |
| Nlrp1b        | chr11:71153101-71230733   | 2.4658   | 4.0973   | 0.7326  | 0.126100 |
| Zfyve19       | chr2:119208616-119217049  | 10.3563  | 7.5181   | -0.4621 | 0.047331 |
| Cirbp         | chr10:80165984-80172786   | 24.4821  | 31.3349  | 0.3560  | 0.042805 |
| Mad2l1        | chr6:66535389-66541033    | 14.9326  | 19.8708  | 0.4122  | 0.027619 |
| Sms           | chrX:157443854-157492287  | 6.8609   | 5.3298   | -0.3643 | 0.006381 |
| Vim           | chr2:13573926-13582826    | 216.3377 | 263.5032 | 0.2845  | 0.135419 |
| Ndufa8        | chr2:36036325-36049406    | 34.8622  | 50.6317  | 0.5384  | 0.099736 |
| Tsc22d2       | chr3:58415688-58466787    | 9.0241   | 7.0260   | -0.3611 | 0.122203 |
| Cluh          | chr11:74649494-74670847   | 22.1829  | 17.5971  | -0.3341 | 0.140181 |
| Recql5        | chr11:115892594-115933477 | 7.1955   | 5.4452   | -0.4021 | 0.094901 |
| Ifi27         | chr12:103434210-103440239 | 59.6014  | 75.6983  | 0.3449  | 0.065032 |
| Zfp280c       | chrX:48541624-48594504    | 9.2384   | 6.9511   | -0.4104 | 0.053503 |
| Apol9a        | chr15:77403788-77411080   | 0.0951   | 0.7766   | 3.0294  | 0.025792 |
| Orai1         | chr5:123015073-123030450  | 17.1874  | 23.2999  | 0.4390  | 0.099179 |
| Grin2d        | chr7:45831882-45870928    | 0.0475   | 0.2948   | 2.6351  | 0.006351 |
| Traj32        | chr14:54186100-54186166   | 95.4004  | 40.2498  | -1.2450 | 0.201982 |
| Gm13680       | chr2:83353156-83353949    | 0.5926   | 2.3375   | 1.9799  | 0.036078 |
| Gm11946       | chr11:3530156-3536856     | 0.6339   | 0.2256   | -1.4906 | 0.004568 |
| Hsp90aa1      | chr12:110690604-110702728 | 39.2281  | 30.0214  | -0.3859 | 0.204368 |
| BC023829      | chrX:70459752-70477180    | 4.9630   | 7.7883   | 0.6501  | 0.048115 |
| Tnfrsf10b     | chr14:69767471-69784403   | 0.7974   | 1.7667   | 1.1478  | 0.131245 |
| Inadl         | chr4:98395784-98719603    | 6.9222   | 5.6480   | -0.2935 | 0.026107 |
| Rps12-ps19    | chr11:75070813-75071213   | 6.2681   | 1.1081   | -2.5000 | 0.236152 |
| Tsc22d3       | chrX:140539527-140600659  | 37.4624  | 31.8753  | -0.2330 | 0.007034 |
| Dgcr2         | chr16:17839481-17894145   | 23.4001  | 18.7769  | -0.3176 | 0.166193 |
| Sreb1         | chr15:82147265-82205376   | 30.2221  | 24.0443  | -0.3299 | 0.158629 |
| Pot1b         | chr17:55652024-55712628   | 6.7946   | 9.7088   | 0.5149  | 0.061402 |
| Gm26493       | chr8:95746059-95746195    | 2.4311   | 12.6660  | 2.3813  | 0.150355 |
| Rhobtb2       | chr14:69784989-69805530   | 13.8638  | 10.4205  | -0.4119 | 0.149183 |
| Ufm1          | chr3:53855211-53863830    | 5.6826   | 8.0584   | 0.5039  | 0.067577 |
| Ago3          | chr4:126331703-126429556  | 5.3209   | 4.3264   | -0.2985 | 0.040149 |
| Arhgef18      | chr8:3393005-3456601      | 35.0665  | 29.7759  | -0.2359 | 0.061433 |

|               |                           |          |          |         |          |
|---------------|---------------------------|----------|----------|---------|----------|
| Slc16a4       | chr3:107291229-107312115  | 3.0833   | 1.8740   | -0.7183 | 0.024708 |
| Tdrd7         | chr4:45965333-46034761    | 2.1230   | 3.8170   | 0.8463  | 0.051235 |
| NA            | chr10:22113049-22149270   | 0.5677   | 1.6129   | 1.5063  | 0.219023 |
| Enpp1         | chr10:24637913-24712159   | 2.1525   | 3.0278   | 0.4923  | 0.048454 |
| Vps26a        | chr10:62454842-62486805   | 19.2384  | 26.2734  | 0.4496  | 0.101521 |
| 2700097O09Rik | chr12:55045660-55080110   | 3.5618   | 2.3618   | -0.5928 | 0.050533 |
| Isca2         | chr12:84773269-84775089   | 20.2284  | 29.0122  | 0.5203  | 0.024634 |
| Ttll5         | chr12:85824658-86061893   | 2.3991   | 1.7026   | -0.4948 | 0.175990 |
| 9330161L09Rik | chr12:103406821-103407820 | 6.4844   | 2.7772   | -1.2233 | 0.159480 |
| 5730480H06Rik | chr5:48395572-48414294    | 3.2614   | 1.2524   | -1.3808 | 0.263230 |
| Eif2ak3       | chr6:70844514-70905245    | 10.2812  | 7.9054   | -0.3791 | 0.075589 |
| Gas2          | chr7:51862014-51994975    | 1.2149   | 2.0724   | 0.7705  | 0.026788 |
| Gm20939       | chr17:94873985-94877497   | 2.9368   | 5.2832   | 0.8472  | 0.018661 |
| BC106179      | chr16:23220655-23225368   | 6.9478   | 4.9383   | -0.4925 | 0.038944 |
| Cox5b         | chr1:36691486-36693385    | 59.0815  | 83.3189  | 0.4959  | 0.083518 |
| Kdelc1        | chr1:44091462-44118808    | 3.4882   | 5.4402   | 0.6412  | 0.132911 |
| Fkbp1a        | chr2:151542482-151561692  | 17.1184  | 13.6062  | -0.3313 | 0.053909 |
| Ccdc17        | chr4:116596653-116600266  | 2.6143   | 4.6884   | 0.8427  | 0.086139 |
| Zmym6         | chr4:127077382-127124372  | 9.2812   | 7.3618   | -0.3343 | 0.050229 |
| Syt1          | chr4:133253089-133263113  | 11.6310  | 16.4848  | 0.5032  | 0.101247 |
| Gm13032       | chr4:140810992-140817511  | 0.5139   | 1.4040   | 1.4499  | 0.030367 |
| Gm23692       | chr16:94429072-94429232   | 8.5984   | 1.1689   | -2.8789 | 0.013636 |
| 4930442H23Rik | chr10:81182604-81183849   | 4.7724   | 1.7154   | -1.4762 | 0.153945 |
| NA            | chr1:34236595-34238820    | 1.5038   | 0.5563   | -1.4347 | 0.100557 |
| Dock4         | chr12:40446052-40846486   | 0.4489   | 0.9102   | 1.0199  | 0.101727 |
| Cyp51         | chr5:4081144-4104746      | 31.2801  | 24.9097  | -0.3285 | 0.151825 |
| Kcnn4         | chr7:24370262-24385209    | 138.7446 | 118.1630 | -0.2317 | 0.075564 |
| Rnps1         | chr17:24414674-24425895   | 23.5545  | 18.2280  | -0.3698 | 0.032952 |
| Fam49b        | chr15:63929096-64060448   | 47.8861  | 58.8575  | 0.2976  | 0.067421 |
| Traj49        | chr14:54168685-54168744   | 1.8992   | 18.1833  | 3.2592  | 0.129984 |
| Zkscan5       | chr5:145204561-145221750  | 3.7699   | 5.6362   | 0.5802  | 0.059491 |
| Fbxl12os      | chr9:20607480-20617271    | 0.4716   | 1.0939   | 1.2140  | 0.089095 |
| Pqlc1         | chr18:80253291-80292725   | 0.5806   | 1.2555   | 1.1126  | 0.039620 |
| Hopx          | chr5:77086442-77115161    | 25.9021  | 34.1879  | 0.4004  | 0.096948 |
| Lnpep         | chr17:17527722-17624489   | 83.7730  | 71.4644  | -0.2293 | 0.076344 |
| Klc2          | chr19:5107745-5118560     | 2.5688   | 4.1747   | 0.7006  | 0.078068 |
| Fancc         | chr13:63304708-63497278   | 7.3602   | 5.8176   | -0.3393 | 0.046279 |
| Fli1          | chr9:32422207-32541389    | 54.0333  | 65.9434  | 0.2874  | 0.052471 |
| Gm26621       | chr15:68334714-68337430   | 2.3276   | 0.9743   | -1.2564 | 0.170871 |
| Cnn1          | chr9:22099280-22109630    | 0.0362   | 0.5156   | 3.8335  | 0.130792 |
| Nsun7         | chr13:69533745-69635780   | 49.1773  | 39.9778  | -0.2988 | 0.183311 |
| Ndufa7        | chr17:33824590-33838316   | 23.2102  | 32.6400  | 0.4919  | 0.124628 |
| A230005M16Rik | chr2:25705849-25709716    | 1.0959   | 3.1263   | 1.5123  | 0.091856 |
| Zfp106        | chr2:120506819-120563843  | 24.8506  | 21.2700  | -0.2245 | 0.034887 |
| Pabpn1        | chr14:54892499-54898169   | 35.3633  | 29.3689  | -0.2680 | 0.031351 |
| Rbm4b         | chr19:4756542-4767065     | 14.6079  | 11.7623  | -0.3126 | 0.127385 |
| Aak1          | chr6:86849516-86991864    | 8.9451   | 6.7829   | -0.3992 | 0.165559 |
| Dhx38         | chr8:109548016-109565601  | 31.3162  | 25.7933  | -0.2799 | 0.067700 |
| Oard1         | chr17:48410013-48417266   | 19.0449  | 27.6263  | 0.5366  | 0.090420 |
| Leprot        | chr4:101647717-101659364  | 19.2792  | 25.3233  | 0.3934  | 0.027828 |
| Gm20648       | chr9:80073428-80073756    | 0.2605   | 3.5544   | 3.7702  | 0.074756 |
| Lrpprc        | chr17:84705246-84790789   | 22.0140  | 18.1106  | -0.2816 | 0.118441 |
| Igsf3         | chr3:101377124-101463060  | 1.5908   | 0.9261   | -0.7806 | 0.109079 |
| Srgap3        | chr6:112717970-112947266  | 1.0078   | 0.4857   | -1.0531 | 0.139314 |
| Sub1          | chr15:11981338-11996983   | 35.7228  | 48.6667  | 0.4461  | 0.209981 |
| Il1r2         | chr1:40084767-40125219    | 23.3585  | 37.3061  | 0.6755  | 0.261794 |
| Kif21b        | chr1:136131388-136177998  | 52.6886  | 42.9029  | -0.2964 | 0.208112 |
| Hist1h2an     | chr13:21786825-21787218   | 34.3940  | 57.8977  | 0.7513  | 0.259291 |
| Gm11695       | chr11:115462044-115463454 | 4.4640   | 1.0181   | -2.1324 | 0.068838 |
| Maf           | chr8:115682941-115707794  | 32.2961  | 42.8993  | 0.4096  | 0.230065 |
| Fam78a        | chr2:32050054-32084857    | 21.8097  | 18.3809  | -0.2468 | 0.027686 |
| Knstrn        | chr2:118814002-118853957  | 4.4873   | 6.1702   | 0.4595  | 0.040009 |
| Igfbp7        | chr5:77349239-77408045    | 1.7058   | 5.1081   | 1.5823  | 0.037344 |
| Ncor1         | chr11:62316425-62458541   | 50.0942  | 44.0159  | -0.1866 | 0.022306 |
| Gga3          | chr11:115584254-115604051 | 10.2412  | 7.3618   | -0.4763 | 0.202487 |
| Rbms2         | chr10:128129469-128180297 | 3.3511   | 2.0914   | -0.6801 | 0.086480 |
| Hist1h2bh     | chr13:23542923-23543359   | 64.5062  | 95.2145  | 0.5617  | 0.197130 |
| Gm17108       | chr13:69610497-69614901   | 11.2059  | 7.9219   | -0.5003 | 0.118691 |
| Ywhag         | chr5:135908408-135934616  | 15.2007  | 12.0927  | -0.3300 | 0.060743 |
| Rnf181        | chr6:72359713-72362721    | 23.0664  | 29.6487  | 0.3622  | 0.043141 |
| Dnajc19-ps    | chr7:103882641-103883119  | 3.3187   | 0.3424   | -3.2768 | 0.097797 |

|               |                           |          |          |         |          |
|---------------|---------------------------|----------|----------|---------|----------|
| Herpud2       | chr9:25108129-25151781    | 11.1892  | 15.4991  | 0.4701  | 0.059380 |
| Slc17a5       | chr9:78536487-78588041    | 6.1895   | 4.2168   | -0.5537 | 0.060378 |
| Agpat4        | chr17:12118703-12219645   | 4.2006   | 6.4336   | 0.6151  | 0.043150 |
| Sod1          | chr16:90220741-90226322   | 118.4740 | 157.5846 | 0.4116  | 0.112906 |
| Gm13939       | chr2:109902395-109913319  | 3.1149   | 1.2752   | -1.2885 | 0.121856 |
| Dph5          | chr3:115888172-115929332  | 20.0336  | 15.3734  | -0.3820 | 0.110954 |
| Wwp1          | chr4:19608302-19708993    | 7.3559   | 9.6911   | 0.3977  | 0.054842 |
| Hivep3        | chr4:119733783-120138045  | 2.5302   | 1.7757   | -0.5109 | 0.156345 |
| Pus1          | chr4:155887878-155891781  | 19.4726  | 14.8028  | -0.3956 | 0.084899 |
| 4930512H18Rik | chr8:61849005-61922834    | 1.7902   | 4.0324   | 1.1715  | 0.093848 |
| Spin2c        | chrX:153832224-153834243  | 4.3762   | 7.9324   | 0.8581  | 0.067557 |
| Ubl3          | chr5:148504630-148552789  | 44.1261  | 54.3823  | 0.3015  | 0.068974 |
| Ddx17         | chr15:79527706-79546741   | 127.1512 | 112.8317 | -0.1724 | 0.002580 |
| Gm340         | chr19:41582369-41586536   | 11.0514  | 8.1983   | -0.4308 | 0.095101 |
| Lix1l         | chr3:96601132-96625352    | 1.2108   | 2.5474   | 1.0730  | 0.064610 |
| Txnrd1        | chr10:82859205-82897724   | 28.0329  | 23.3741  | -0.2622 | 0.012880 |
| Pcnx          | chr12:81860029-82000924   | 7.4789   | 6.0294   | -0.3108 | 0.086815 |
| Colgalt1      | chr8:71611023-71624909    | 25.4776  | 20.5148  | -0.3126 | 0.093948 |
| lrf2bp2       | chr8:126588295-126593436  | 48.5365  | 58.5428  | 0.2704  | 0.080381 |
| Gm3739        | chr14:7293647-7315049     | 1.6810   | 3.7164   | 1.1446  | 0.113886 |
| Ankrd16       | chr2:11777875-11790325    | 16.0766  | 12.8599  | -0.3221 | 0.139290 |
| Ahcy1         | chr3:107663117-107696560  | 17.1656  | 13.9357  | -0.3007 | 0.096055 |
| Trpv4         | chr5:114622151-114658421  | 0.7395   | 0.1325   | -2.4803 | 0.152368 |
| Car7          | chr8:104534699-104550343  | 0.1390   | 0.8252   | 2.5693  | 0.123444 |
| Cul4a         | chr8:13105620-13147940    | 10.3858  | 13.1321  | 0.3385  | 0.049782 |
| Ankrd11       | chr8:122883336-122974793  | 41.7023  | 34.8823  | -0.2576 | 0.151137 |
| Cdca2         | chr14:67676330-67715841   | 4.1815   | 5.9586   | 0.5110  | 0.121708 |
| Bmf           | chr2:118528756-118549687  | 2.7464   | 1.5659   | -0.8106 | 0.075884 |
| NA            | chr1:6214611-6215292      | 3.8517   | 8.9639   | 1.2186  | 0.027427 |
| Hist3h2ba     | chr11:58948910-58949532   | 16.8274  | 27.8814  | 0.7285  | 0.227845 |
| Nfil3         | chr13:52967208-52981073   | 10.5579  | 15.6049  | 0.5637  | 0.116861 |
| Sos2          | chr12:69583761-69681852   | 6.3885   | 4.8720   | -0.3910 | 0.089937 |
| Tmem192       | chr8:64947184-64969034    | 13.0147  | 18.7165  | 0.5242  | 0.021999 |
| lrak4         | chr15:94543642-94581815   | 9.0314   | 11.4478  | 0.3420  | 0.007986 |
| Ccdc163       | chr4:116708508-116751206  | 2.7789   | 4.6030   | 0.7281  | 0.021886 |
| Padi2         | chr4:140906343-140952586  | 3.9455   | 6.3566   | 0.6880  | 0.101606 |
| 1700007J10Rik | chr11:59725916-59740154   | 0.1903   | 1.0069   | 2.4040  | 0.035982 |
| Mrpl52        | chr14:54426908-54429750   | 68.7993  | 94.8001  | 0.4625  | 0.075193 |
| Col20a1       | chr2:180986534-181017540  | 1.6606   | 0.8697   | -0.9331 | 0.011609 |
| Chrne         | chr11:70614882-70619216   | 0.1391   | 0.9298   | 2.7410  | 0.103823 |
| Lgmn          | chr12:102394083-102439813 | 9.3765   | 12.8621  | 0.4560  | 0.020456 |
| Zfp870        | chr17:32879227-32886083   | 3.9740   | 5.4778   | 0.4630  | 0.025873 |
| Ube2j1        | chr4:33031415-33052363    | 35.8825  | 45.8097  | 0.3524  | 0.102078 |
| Cutc          | chr19:43752995-43768638   | 2.1438   | 5.7786   | 1.4305  | 0.036674 |
| Extl3         | chr14:65052059-65098106   | 16.7459  | 13.1814  | -0.3453 | 0.149848 |
| Usp28         | chr9:48985384-49042517    | 15.8330  | 11.1735  | -0.5029 | 0.277471 |
| Nop56         | chr2:130274429-130279313  | 43.0297  | 34.9696  | -0.2992 | 0.169853 |
| Cd53          | chr3:106758860-106790149  | 269.2594 | 323.3510 | 0.2641  | 0.090305 |
| P4ha1         | chr10:59323295-59373304   | 23.9769  | 29.0500  | 0.2769  | 0.009368 |
| Emid1         | chr11:5106264-5152257     | 1.2582   | 0.4473   | -1.4919 | 0.091096 |
| Polg2         | chr11:106768252-106779537 | 7.2051   | 5.0279   | -0.5191 | 0.187602 |
| Dguok         | chr6:83480216-83506969    | 13.7668  | 17.8929  | 0.3782  | 0.001840 |
| Zdhhc13       | chr7:48789002-48827440    | 16.8350  | 24.0829  | 0.5165  | 0.149598 |
| Cd86          | chr16:36603868-36666081   | 1.9317   | 3.3503   | 0.7944  | 0.141545 |
| Vstm5         | chr9:15239044-15259393    | 0.8996   | 0.1156   | -2.9606 | 0.232546 |
| Tnfrsf13b     | chr11:61126754-61149372   | 19.9739  | 25.3873  | 0.3460  | 0.030533 |
| Shcbp1l       | chr1:153425161-153452574  | 0.7113   | 0.1942   | -1.8732 | 0.145385 |
| Aurkaip1      | chr4:155831271-155833130  | 32.8545  | 43.0998  | 0.3916  | 0.103536 |
| Herc2         | chr7:56050154-56231794    | 36.8708  | 31.9431  | -0.2070 | 0.081703 |
| mt-Nd1        | chrM:2750-3707            | 626.5446 | 516.6735 | -0.2782 | 0.174140 |
| lfrd2         | chr9:107587717-107593038  | 23.5922  | 17.6468  | -0.4189 | 0.132412 |
| Smim11        | chr16:92301285-92313041   | 12.6523  | 19.6385  | 0.6343  | 0.084900 |
| 9430008C03Rik | chr2:158355306-158361580  | 15.3203  | 11.9517  | -0.3582 | 0.119298 |
| Cpt1a         | chr19:3323300-3385732     | 22.7032  | 30.0065  | 0.4024  | 0.204895 |
| Mbn1          | chr3:60501251-60629748    | 333.0354 | 386.0541 | 0.2131  | 0.029833 |
| Gm26116       | chr11:54658496-54658573   | 25.7848  | 5.7882   | -2.1553 | 0.208791 |
| Hpgds         | chr6:65117292-65144908    | 0.9465   | 2.2646   | 1.2585  | 0.158680 |
| Eif4g3        | chr4:137993021-138208508  | 15.9748  | 13.1980  | -0.2755 | 0.108352 |
| Wipf2         | chr11:98863637-98905040   | 4.6444   | 3.3770   | -0.4597 | 0.102147 |
| Hexa          | chr9:59539666-59565105    | 20.5117  | 26.8296  | 0.3874  | 0.038133 |
| Hsd17b11      | chr5:103989761-104021919  | 3.1400   | 5.1111   | 0.7029  | 0.070147 |

|               |                           |          |          |         |          |
|---------------|---------------------------|----------|----------|---------|----------|
| Suv420h2      | chr7:4740114-4747514      | 9.5695   | 7.0189   | -0.4472 | 0.109287 |
| Cars          | chr7:143557229-143600090  | 11.0791  | 8.1647   | -0.4404 | 0.176931 |
| Shisa5        | chr9:109038564-109057724  | 703.3188 | 841.7724 | 0.2593  | 0.145317 |
| Dis3          | chr14:99076633-99099770   | 25.4379  | 20.3582  | -0.3214 | 0.100460 |
| Rapgef4os3    | chr2:72244964-72248975    | 0.5133   | 0.0873   | -2.5559 | 0.003276 |
| Oip5          | chr2:119609511-119618469  | 2.8158   | 5.3127   | 0.9159  | 0.077978 |
| Zbp1          | chr2:173206611-173218923  | 25.4947  | 33.1241  | 0.3777  | 0.110991 |
| Cd2           | chr3:101275898-101287939  | 322.9650 | 373.6272 | 0.2102  | 0.009133 |
| Gm20511       | chr11:103190709-103192896 | 33.6969  | 21.5516  | -0.6448 | 0.099170 |
| Brwd1         | chr16:95992091-96082526   | 14.0589  | 11.9782  | -0.2311 | 0.069321 |
| Arvcf         | chr16:18348181-18407076   | 0.5889   | 1.1226   | 0.9306  | 0.038301 |
| Lrrc8dos      | chr5:105814772-105818988  | 0.4374   | 2.8366   | 2.6973  | 0.101097 |
| Tigd5         | chr15:75909759-75912148   | 1.6359   | 0.6619   | -1.3055 | 0.072149 |
| Sh3bp5        | chr14:31359879-31436078   | 15.0193  | 11.9364  | -0.3314 | 0.014312 |
| Acsc2         | chr2:155517947-155585724  | 5.9511   | 4.2784   | -0.4761 | 0.187815 |
| Nfkbid        | chr7:30421731-30428746    | 50.1603  | 39.4495  | -0.3465 | 0.195856 |
| Cml1          | chr6:85910153-85915687    | 2.1600   | 4.1814   | 0.9530  | 0.018262 |
| Eea1          | chr10:95940662-96045518   | 36.7069  | 46.3289  | 0.3359  | 0.220836 |
| Nim1k         | chr13:119710093-119755882 | 0.6841   | 0.2848   | -1.2642 | 0.264668 |
| Gm16156       | chr8:105934332-105945843  | 8.7681   | 4.6114   | -0.9271 | 0.046157 |
| Gm25500       | chr9:15312551-15312674    | 26.6407  | 9.4571   | -1.4942 | 0.060639 |
| Dzip3         | chr16:48924231-48994165   | 5.9526   | 4.6148   | -0.3673 | 0.091044 |
| Tuba4a        | chr1:75214973-75219253    | 84.6352  | 67.7896  | -0.3202 | 0.191914 |
| Dbi           | chr1:120113279-120121078  | 19.3545  | 28.3910  | 0.5528  | 0.128652 |
| 1700066B19Rik | chr18:35703224-35730869   | 0.7651   | 1.8984   | 1.3110  | 0.043299 |
| Bmyc          | chr2:25706878-25707717    | 6.0449   | 11.7165  | 0.9548  | 0.141523 |
| Urm1          | chr2:29820074-29845002    | 9.5686   | 7.1725   | -0.4158 | 0.093461 |
| Trmt10a       | chr3:138143447-138159821  | 2.3122   | 1.5544   | -0.5730 | 0.084582 |
| Tspan17       | chr13:54789376-54796776   | 0.6333   | 2.1382   | 1.7554  | 0.074988 |
| Tmem17        | chr11:22512087-22519234   | 0.0818   | 0.6718   | 3.0378  | 0.019122 |
| 4932702P03Rik | chr13:24905592-24914272   | 0.0412   | 0.2931   | 2.8322  | 0.007488 |
| Atpaf2        | chr11:60400625-60418457   | 11.0895  | 15.7607  | 0.5071  | 0.060039 |
| Usp36         | chr11:118259650-118290244 | 8.2226   | 6.6124   | -0.3144 | 0.046907 |
| Opn1sw        | chr6:29376670-29388468    | 0.9298   | 0.2400   | -1.9540 | 0.020479 |
| Kif7          | chr7:79698098-79714186    | 2.7895   | 1.6663   | -0.7433 | 0.122871 |
| Nr2f6         | chr8:71374122-71381960    | 8.0965   | 5.4203   | -0.5789 | 0.132661 |
| Fto           | chr8:91313531-91668439    | 4.0868   | 3.0983   | -0.3995 | 0.150404 |
| Ihm2c         | chr1:85894280-85908675    | 105.5117 | 130.6186 | 0.3080  | 0.143508 |
| Rps23         | chr13:90923130-90924942   | 1.3432   | 5.0501   | 1.9107  | 0.021064 |
| Irf1          | chr11:53770013-53778374   | 97.5456  | 113.4316 | 0.2177  | 0.017703 |
| Appbp2        | chr11:85187261-85235130   | 17.3111  | 14.0637  | -0.2997 | 0.131268 |
| Gm11696       | chr11:109354777-109363654 | 4.1928   | 6.2808   | 0.5830  | 0.048542 |
| Adam21        | chr12:81558583-81568474   | 0.4281   | 0.0273   | -3.9692 | 0.087861 |
| Med26         | chr8:72494557-72548310    | 7.2219   | 4.7972   | -0.5902 | 0.092806 |
| Crtam         | chr9:40972752-41004628    | 9.5851   | 6.3916   | -0.5846 | 0.114984 |
| BC021614      | chr19:4057477-4059295     | 59.6741  | 80.3383  | 0.4290  | 0.108399 |
| Dsn1          | chr2:156995264-157007154  | 8.8032   | 6.4033   | -0.4592 | 0.058180 |
| Ebna1bp2      | chr4:118620798-118627776  | 35.5419  | 28.9208  | -0.2974 | 0.136731 |
| Tmem234       | chr4:129600667-129624059  | 32.3014  | 38.1371  | 0.2396  | 0.000495 |
| Mtor          | chr4:148448610-148557683  | 13.4262  | 11.2284  | -0.2579 | 0.067307 |
| Cnih2         | chr19:5092870-5098418     | 0.9378   | 2.7409   | 1.5473  | 0.032399 |
| Chst11        | chr10:82985497-83195900   | 0.9850   | 2.0743   | 1.0744  | 0.094529 |
| Serpib9       | chr13:33003249-33017957   | 11.0156  | 15.5325  | 0.4957  | 0.156798 |
| 1700023H06Rik | chr13:80884223-80885524   | 3.3207   | 6.7745   | 1.0286  | 0.147434 |
| Gimap6        | chr6:48701581-48708225    | 277.5349 | 333.4353 | 0.2647  | 0.110811 |
| Snord35a      | chr7:45126345-45126435    | 46.0725  | 19.2433  | -1.2596 | 0.107770 |
| Cd81          | chr7:143052738-143067934  | 34.1788  | 43.2642  | 0.3401  | 0.089739 |
| Kri1          | chr9:21273457-21287971    | 46.7968  | 39.2177  | -0.2549 | 0.049382 |
| Mapk11        | chr15:89142485-89149606   | 34.3266  | 27.4929  | -0.3203 | 0.124566 |
| Gpd2          | chr2:57237634-57370719    | 4.6295   | 3.5269   | -0.3924 | 0.006668 |
| Gss           | chr2:155563180-155592810  | 2.7388   | 1.7296   | -0.6631 | 0.156794 |
| Tmem167b      | chr3:108556424-108562466  | 19.6927  | 25.1281  | 0.3516  | 0.061315 |
| Ccb12         | chr3:142701050-142744910  | 1.0851   | 2.3128   | 1.0919  | 0.073192 |
| Tnfrsf18      | chr4:156026163-156028895  | 167.3390 | 207.0550 | 0.3072  | 0.136602 |
| Dlg4          | chr11:70017084-70045532   | 4.1836   | 2.9408   | -0.5086 | 0.061475 |
| Ap3b1         | chr13:94358959-94566316   | 36.4198  | 44.3251  | 0.2834  | 0.045278 |
| Atp6v1f       | chr6:29467717-29470512    | 33.6858  | 45.3246  | 0.4282  | 0.097206 |
| Mmd           | chr11:90187683-90278589   | 23.0678  | 27.6186  | 0.2598  | 0.016455 |
| Axl           | chr7:25757272-25788705    | 8.9756   | 13.6921  | 0.6093  | 0.256872 |
| Lrrc32        | chr7:98494221-98501831    | 44.9330  | 35.0495  | -0.3584 | 0.251889 |
| Mrpl57        | chr14:57826238-57828745   | 11.4817  | 15.2954  | 0.4138  | 0.023510 |

|               |                           |          |          |         |          |
|---------------|---------------------------|----------|----------|---------|----------|
| Iars          | chr13:49682099-49734267   | 15.3463  | 11.9349  | -0.3627 | 0.195801 |
| Col7a1        | chr9:108953585-108984875  | 0.3947   | 0.1457   | -1.4382 | 0.178894 |
| Ppl           | chr16:5086290-5132481     | 0.6133   | 0.2022   | -1.6008 | 0.040104 |
| Clec16a       | chr16:10545338-10744878   | 5.6142   | 4.3710   | -0.3611 | 0.049753 |
| Impad1        | chr4:4762483-4793355      | 12.5991  | 16.0817  | 0.3521  | 0.094299 |
| Fam92a        | chr4:12153408-12172015    | 5.5960   | 7.6615   | 0.4532  | 0.060370 |
| Zfp133-ps     | chr2:144459279-144500267  | 0.6418   | 0.1650   | -1.9595 | 0.130270 |
| Cd24a         | chr10:43579168-43584262   | 7.0117   | 4.0501   | -0.7918 | 0.142924 |
| Tcp11l2       | chr10:84576625-84614359   | 16.4564  | 20.9802  | 0.3504  | 0.055599 |
| Bms1          | chr6:118383382-118419417  | 45.3112  | 38.4347  | -0.2375 | 0.090705 |
| Actr1a        | chr19:46376813-46395735   | 46.7957  | 55.5057  | 0.2463  | 0.003586 |
| Abhd12        | chr2:150832492-150904741  | 17.7532  | 22.8030  | 0.3611  | 0.064489 |
| 1700028N14Rik | chr11:103264859-103267745 | 1.1110   | 4.2662   | 1.9411  | 0.188745 |
| Grn           | chr11:102430314-102437048 | 5.5472   | 8.4695   | 0.6105  | 0.176095 |
| Gm4759        | chr7:106421549-106441073  | 101.3156 | 81.2301  | -0.3188 | 0.260321 |
| Unc13a        | chr8:71624416-71671757    | 1.7404   | 1.1941   | -0.5434 | 0.116462 |
| Rgs1          | chr1:144243971-144249242  | 45.0073  | 56.4903  | 0.3278  | 0.132369 |
| 4833422C13Rik | chr13:91701664-91741872   | 2.0978   | 1.3051   | -0.6848 | 0.058168 |
| Gm22676       | chr2:112500868-112500997  | 0.6622   | 7.6798   | 3.5357  | 0.312365 |
| Tra2a         | chr6:49243920-49264052    | 42.1358  | 32.9983  | -0.3527 | 0.134691 |
| 4930507D05Rik | chr10:62449488-62451322   | 2.1392   | 0.8995   | -1.2500 | 0.056437 |
| Rnf138        | chr18:21001340-21028223   | 14.5288  | 18.8983  | 0.3793  | 0.073311 |
| Ift80         | chr3:68892498-69004570    | 62.6802  | 51.1605  | -0.2930 | 0.213245 |
| Gm17364       | chr13:41273802-41273977   | 38.3530  | 9.8021   | -1.9682 | 0.023908 |
| Zdhc23        | chr16:43969077-43979093   | 3.3904   | 6.0470   | 0.8348  | 0.023109 |
| Pus10         | chr11:23665673-23732876   | 14.0894  | 11.3281  | -0.3147 | 0.048478 |
| Txn2          | chr15:77915046-77929006   | 16.7855  | 12.1330  | -0.4683 | 0.198825 |
| Son           | chr16:91647505-91679221   | 99.4349  | 88.9274  | -0.1611 | 0.003808 |
| Nab1          | chr1:52457293-52500679    | 27.2775  | 32.7479  | 0.2637  | 0.016811 |
| Rc3h1         | chr1:160906417-160974978  | 19.7907  | 16.5914  | -0.2544 | 0.119842 |
| Ugp2          | chr11:21321137-21371201   | 18.4517  | 23.8948  | 0.3729  | 0.105304 |
| Gm15444       | chr3:96209626-96220168    | 4.8930   | 10.6733  | 1.1252  | 0.032274 |
| Srsf12        | chr4:33208990-33233340    | 1.0996   | 0.3987   | -1.4635 | 0.015125 |
| Nmrk2         | chr10:81198169-81202037   | 0.0813   | 0.6183   | 2.9263  | 0.046835 |
| Dhx33         | chr11:70984090-71004437   | 9.3561   | 7.7862   | -0.2650 | 0.032668 |
| 2010300F17Rik | chr11:96712981-96747436   | 13.7268  | 17.9810  | 0.3895  | 0.052245 |
| Gtf3c5        | chr2:28566310-28583751    | 6.4791   | 4.9298   | -0.3942 | 0.009195 |
| 2700038G22Rik | chr5:23850596-23854924    | 9.4150   | 5.4389   | -0.7916 | 0.144892 |
| Ept1          | chr5:30232580-30272012    | 7.3365   | 5.8563   | -0.3251 | 0.121690 |
| 9330104G04Rik | chr7:16871353-16874886    | 2.5478   | 1.1450   | -1.1539 | 0.197139 |
| Snrnp70       | chr7:45376461-45395692    | 184.8542 | 161.4500 | -0.1953 | 0.028472 |
| Ucp2          | chr7:100493336-100502020  | 46.4661  | 39.0419  | -0.2512 | 0.162325 |
| Ubxn8         | chr8:33619585-33641976    | 10.2112  | 14.0686  | 0.4623  | 0.075911 |
| Trmt1         | chr8:84686306-84699808    | 14.2149  | 11.6317  | -0.2893 | 0.073828 |
| Rora          | chr9:68653785-69388246    | 8.6463   | 11.0270  | 0.3509  | 0.123842 |
| Arpp19        | chr9:75037613-75060313    | 12.1619  | 15.9109  | 0.3876  | 0.111457 |
| Maf1          | chr15:76351293-76354380   | 42.1435  | 52.1558  | 0.3075  | 0.092494 |
| Gm17206       | chr15:83102071-83105929   | 3.8417   | 8.6052   | 1.1634  | 0.022800 |
| Scube3        | chr17:28142315-28174852   | 0.1459   | 0.0137   | -3.4111 | 0.155314 |
| Ammecr1l      | chr18:31759823-31784071   | 14.0537  | 10.8932  | -0.3675 | 0.141441 |
| Nup214        | chr2:31974435-32053975    | 8.8852   | 7.4514   | -0.2539 | 0.006826 |
| Evc           | chr5:37289097-37336894    | 0.1677   | 0.0163   | -3.3601 | 0.094071 |
| Syce1l        | chr8:113643212-113655533  | 0.3082   | 1.7806   | 2.5305  | 0.013052 |
| Gm14817       | chrX:73795214-73797616    | 0.1329   | 1.4991   | 3.4953  | 0.275677 |
| Tbc1d14       | chr5:36490603-36593276    | 7.3696   | 5.9133   | -0.3176 | 0.087731 |
| Ggn           | chr7:29170219-29173933    | 0.9347   | 0.2231   | -2.0671 | 0.087726 |
| Rere          | chr4:150281645-150621966  | 7.8544   | 6.0689   | -0.3721 | 0.152850 |
| Ptges3        | chr10:128058953-128077272 | 18.5672  | 13.8672  | -0.4211 | 0.138657 |
| Ccdc69        | chr11:55049730-55078131   | 21.4524  | 28.0864  | 0.3887  | 0.063050 |
| Mapk7         | chr11:61488811-61494406   | 7.6414   | 5.4072   | -0.4990 | 0.186494 |
| Pum2          | chr12:8674133-8752581     | 51.2692  | 44.1060  | -0.2171 | 0.076000 |
| Brpf1         | chr6:113307180-113324857  | 15.1931  | 12.7280  | -0.2554 | 0.041211 |
| Sacs          | chr14:61138456-61240695   | 21.3325  | 18.3854  | -0.2145 | 0.067854 |
| Serpind1      | chr16:17331370-17343575   | 0.3812   | 1.4057   | 1.8825  | 0.089507 |
| Scarna2       | chr3:108554337-108554751  | 646.1440 | 789.0736 | 0.2883  | 0.141030 |
| Usp24         | chr4:106316212-106441322  | 26.6129  | 22.6951  | -0.2297 | 0.099673 |
| Cxx1c         | chrX:53607921-53609132    | 0.6693   | 2.3429   | 1.8075  | 0.029080 |
| A630052C17Rik | chr11:29170908-29173558   | 11.2239  | 8.0716   | -0.4756 | 0.070100 |
| Abhd15        | chr11:77515120-77538607   | 1.2882   | 2.6980   | 1.0665  | 0.064374 |
| Hist1h2bf     | chr13:23573735-23574196   | 21.9654  | 37.6491  | 0.7774  | 0.255006 |
| Cebpa         | chr7:35119292-35121926    | 6.4757   | 10.3295  | 0.6737  | 0.198400 |



|               |                           |           |          |         |          |
|---------------|---------------------------|-----------|----------|---------|----------|
| Thsd1         | chr8:22227312-22261334    | 0.5560    | 0.1588   | -1.8080 | 0.121768 |
| Lrrfip2       | chr9:111118110-111225668  | 11.7305   | 15.2092  | 0.3747  | 0.048792 |
| Ubp1          | chr9:113930933-113977199  | 51.6686   | 44.6590  | -0.2103 | 0.026298 |
| Avpr2         | chrX:73892101-73895502    | 44.3204   | 35.3715  | -0.3254 | 0.198954 |
| Ndrgr1        | chr15:66929320-66969640   | 6.9349    | 5.3100   | -0.3851 | 0.118826 |
| Ly6c1         | chr15:75045016-75048837   | 29.5190   | 19.5474  | -0.5947 | 0.154701 |
| Sgsm3         | chr15:80977764-81012289   | 2.9215    | 1.6923   | -0.7877 | 0.226288 |
| Gm20687       | chr14:55056177-55072397   | 2.9681    | 0.6978   | -2.0887 | 0.136519 |
| Vwa8          | chr14:78849177-79202310   | 10.5282   | 8.5755   | -0.2960 | 0.033130 |
| Srrm2         | chr17:23803186-23824739   | 83.6570   | 66.1486  | -0.3388 | 0.322546 |
| Ypel1         | chr16:17069695-17087045   | 4.2109    | 5.7574   | 0.4513  | 0.013727 |
| Gm16066       | chr19:3798614-3852419     | 3.6194    | 1.5087   | -1.2625 | 0.016020 |
| Ddx59         | chr1:136415270-136440158  | 4.9084    | 7.7446   | 0.6579  | 0.128864 |
| Pck2          | chr14:55540265-55550017   | 6.1015    | 8.8955   | 0.5439  | 0.142425 |
| Ccr5          | chr9:124121542-124147699  | 6.2205    | 8.8939   | 0.5158  | 0.145824 |
| Fez2          | chr17:78377884-78418131   | 6.3812    | 9.8199   | 0.6219  | 0.067371 |
| Fadd          | chr7:144577317-144582463  | 4.0978    | 5.8211   | 0.5065  | 0.040895 |
| Atp11a        | chr8:12757013-12868728    | 7.5300    | 5.7600   | -0.3866 | 0.205774 |
| Plxdc1        | chr11:97923237-97986444   | 1.1958    | 2.0826   | 0.8004  | 0.091238 |
| Tmem150a      | chr6:72355446-72359762    | 2.2983    | 4.1685   | 0.8590  | 0.010189 |
| Gm26529       | chr7:89980748-89981848    | 3.1199    | 6.0489   | 0.9552  | 0.017998 |
| Mettl16       | chr11:74770829-74828525   | 6.8948    | 5.6814   | -0.2793 | 0.059322 |
| Fuk           | chr8:110882462-110902459  | 6.3239    | 4.3198   | -0.5499 | 0.161267 |
| Snord14e      | chr9:40804747-40804837    | 102.4611  | 54.3000  | -0.9161 | 0.076590 |
| Terf1         | chr1:15805657-15843428    | 20.1781   | 14.4752  | -0.4792 | 0.077559 |
| 1810030007Rik | chrX:12654878-12673668    | 22.1369   | 28.4663  | 0.3628  | 0.086263 |
| Slain1os      | chr14:103692982-103699442 | 7.2379    | 5.0369   | -0.5230 | 0.090283 |
| Macrocl1      | chr19:7056767-7198061     | 6.6194    | 3.9414   | -0.7480 | 0.008766 |
| NA            | chr16:18923072-18925657   | 4.0622    | 1.6121   | -1.3333 | 0.083359 |
| Alg14         | chr3:121291816-121362011  | 9.9396    | 5.7040   | -0.8012 | 0.065387 |
| Rbpj          | chr5:53555778-53657445    | 4.7057    | 6.5597   | 0.4792  | 0.115487 |
| Zscan22       | chr7:12897814-12909083    | 4.4844    | 2.8724   | -0.6427 | 0.163535 |
| 2310022A10Rik | chr7:27553294-27582094    | 1.7948    | 3.1326   | 0.8035  | 0.068081 |
| Rspry1        | chr8:94601954-94660275    | 15.5411   | 13.1778  | -0.2380 | 0.008041 |
| Zcchc18       | chrX:136993154-136998472  | 2.3622    | 4.1071   | 0.7980  | 0.121880 |
| Gm23935       | chr16:11144124-11144181   | 1167.3346 | 832.4870 | -0.4877 | 0.224498 |
| Cblb          | chr16:52031548-52208047   | 22.1428   | 18.1117  | -0.2899 | 0.157325 |
| Entpd1        | chr19:40612365-40741602   | 10.4381   | 13.3892  | 0.3592  | 0.094179 |
| Per2          | chr1:91415983-91459330    | 1.5941    | 0.9514   | -0.7446 | 0.048104 |
| Pura          | chr18:36281096-36301521   | 11.4432   | 9.5725   | -0.2575 | 0.099875 |
| Gm13185       | chr2:3752985-3755177      | 6.8780    | 3.2738   | -1.0710 | 0.136464 |
| Ctps          | chr4:120539867-120570276  | 18.8951   | 14.8339  | -0.3491 | 0.087945 |
| 2610301B20Rik | chr4:10874497-10899425    | 1.3299    | 3.6092   | 1.4403  | 0.133581 |
| Aldoc         | chr11:78322967-78327781   | 1.7162    | 3.3164   | 0.9504  | 0.196191 |
| Medag         | chr5:149368475-149431723  | 0.7473    | 0.3418   | -1.1288 | 0.050365 |
| Stx3          | chr19:11775118-11819403   | 2.2272    | 1.3917   | -0.6784 | 0.046769 |
| Ccnt2         | chr1:127774163-127808061  | 18.1645   | 14.7252  | -0.3028 | 0.240630 |
| Aim1l         | chr4:134065911-134092504  | 3.0281    | 2.1711   | -0.4800 | 0.045657 |
| Prnd          | chr2:131909956-131956130  | 0.0552    | 0.3877   | 2.8112  | 0.070973 |
| Zfc3h1        | chr10:115384958-115432772 | 40.1548   | 34.1673  | -0.2330 | 0.139693 |
| Tmie          | chr9:110865710-110880113  | 3.5089    | 2.0675   | -0.7631 | 0.095541 |
| Eif2d         | chr1:131153180-131187658  | 15.8627   | 13.2381  | -0.2609 | 0.057932 |
| Cnn3          | chr3:121426540-121458205  | 7.9940    | 5.2952   | -0.5942 | 0.064189 |
| Diap3         | chr14:86655366-87141224   | 6.0544    | 8.4062   | 0.4735  | 0.125356 |
| Cryz1l        | chr16:91689321-91728975   | 7.4184    | 5.5272   | -0.4246 | 0.051705 |
| Chka          | chr19:3851772-3894369     | 1.3248    | 0.8945   | -0.5665 | 0.063860 |
| Dnaja1        | chr4:40722149-40737149    | 12.6121   | 10.2260  | -0.3026 | 0.119399 |
| Ptprcap       | chr19:4154605-4156751     | 346.5648  | 433.6051 | 0.3233  | 0.227227 |
| Map2k4        | chr11:65688242-65788297   | 8.4902    | 10.9796  | 0.3710  | 0.034679 |
| Xpc           | chr6:91489304-91515884    | 13.5843   | 10.8425  | -0.3252 | 0.139573 |
| Ikbkap        | chr4:56749679-56802331    | 15.8652   | 13.3529  | -0.2487 | 0.034503 |
| Vipr1         | chr9:121642715-121672954  | 5.9035    | 4.3072   | -0.4548 | 0.128402 |
| A930005H10Rik | chr3:115887821-115888130  | 21.6991   | 11.6871  | -0.8927 | 0.093179 |
| Snord91a      | chr11:74905423-74905516   | 1.1481    | 10.4972  | 3.1927  | 0.186414 |
| Thop1         | chr10:81070034-81082559   | 7.6466    | 5.3937   | -0.5036 | 0.190464 |
| Cdkl2         | chr5:92006073-92043042    | 0.1907    | 0.6325   | 1.7296  | 0.077260 |
| Akr1e1        | chr13:4590756-4609174     | 2.3050    | 3.7692   | 0.7095  | 0.038437 |
| Gm15739       | chr5:146248550-146249422  | 3.5108    | 1.2080   | -1.5392 | 0.248585 |
| Gys1          | chr7:45434843-45456619    | 2.2904    | 3.4426   | 0.5879  | 0.059254 |
| 2500002B13Rik | chr8:57488053-57508877    | 0.5609    | 0.0929   | -2.5943 | 0.006455 |
| Rab33b        | chr3:51483965-51495905    | 14.0703   | 18.1291  | 0.3656  | 0.047065 |

|               |                           |           |           |         |          |
|---------------|---------------------------|-----------|-----------|---------|----------|
| Gcnt1         | chr19:17326140-17356667   | 2.0176    | 3.3023    | 0.7108  | 0.131622 |
| mt-Nd3        | chrM:9458-9806            | 0.3133    | 2.7794    | 3.1494  | 0.165917 |
| Pisd-ps1      | chr11:3125903-3131004     | 85.2753   | 108.5323  | 0.3479  | 0.166358 |
| Tanc2         | chr11:105589985-105929304 | 0.3148    | 0.1242    | -1.3417 | 0.130671 |
| Jkamp         | chr12:72085588-72101461   | 6.7676    | 9.3875    | 0.4721  | 0.034101 |
| Ap3m2         | chr8:22787353-22805654    | 7.3144    | 9.6409    | 0.3984  | 0.009485 |
| Ttc13         | chr8:124671334-124721983  | 13.4726   | 11.5928   | -0.2168 | 0.006932 |
| Parp3         | chr9:106470321-106476949  | 30.3990   | 24.7943   | -0.2940 | 0.122953 |
| Il18r1        | chr1:40465551-40500854    | 21.0395   | 28.4370   | 0.4347  | 0.262066 |
| D63008O14Rik  | chr1:106541942-106575045  | 14.8371   | 11.2561   | -0.3985 | 0.039080 |
| Rtfcd1        | chr2:172440555-172469908  | 34.7839   | 42.4124   | 0.2861  | 0.041401 |
| Txnip         | chr3:96557956-96561883    | 189.3029  | 218.3009  | 0.2056  | 0.012035 |
| 4933421A08Rik | chr4:122961308-122963475  | 1.2765    | 0.2084    | -2.6148 | 0.116540 |
| E130102H24Rik | chr4:101346530-101356248  | 3.4999    | 9.4022    | 1.4257  | 0.034031 |
| Gm15792       | chr5:110331205-110333203  | 0.1389    | 1.2240    | 3.1392  | 0.074698 |
| Kif18b        | chr11:102905528-102925124 | 5.8807    | 8.7097    | 0.5666  | 0.161048 |
| Pus1          | chr5:110773666-110780659  | 20.3252   | 15.9856   | -0.3465 | 0.057810 |
| Eml2          | chr7:19176420-19206482    | 9.1757    | 6.2858    | -0.5457 | 0.261931 |
| Mctp2         | chr7:72077831-72306595    | 3.9020    | 2.8113    | -0.4730 | 0.049424 |
| Nmb           | chr7:80902226-80905076    | 6.0474    | 10.3002   | 0.7683  | 0.018248 |
| Gm9967        | chr7:126774964-126776818  | 3.1381    | 1.4063    | -1.1580 | 0.156858 |
| Gm16091       | chr8:72147600-72160855    | 29.8445   | 21.1559   | -0.4964 | 0.121563 |
| Cyp4f16       | chr17:32536557-32551798   | 0.7462    | 1.7631    | 1.2404  | 0.199922 |
| Safb          | chr17:56584824-56606294   | 19.4110   | 16.5413   | -0.2308 | 0.039330 |
| Fbxl17        | chr17:63057451-63500017   | 9.4744    | 7.6053    | -0.3170 | 0.034224 |
| Lrrc58        | chr16:37868388-37888858   | 15.2216   | 12.8057   | -0.2493 | 0.067643 |
| Ttc3          | chr16:94370617-94469222   | 18.6483   | 16.0792   | -0.2138 | 0.072650 |
| Slc15a3       | chr19:10839726-10859362   | 0.9847    | 1.8126    | 0.8803  | 0.137108 |
| Rassf2        | chr2:131989414-132030258  | 18.9195   | 16.6486   | -0.1845 | 0.001119 |
| Depdc1a       | chr3:159495432-159529955  | 1.2279    | 2.2561    | 0.8777  | 0.075457 |
| Gm12869       | chr4:107349038-107351353  | 7.4990    | 1.9270    | -1.9603 | 0.173124 |
| Gm12917       | chr4:124718998-124719637  | 8.1764    | 3.6722    | -1.1548 | 0.163437 |
| Lypla2        | chr4:135968223-135972626  | 36.2232   | 45.8840   | 0.3411  | 0.119277 |
| Trav4-4-dv10  | chr14:53683646-53684176   | 5.9482    | 14.6019   | 1.2956  | 0.036863 |
| Gramd1a       | chr7:31130126-31151050    | 118.2279  | 99.7486   | -0.2452 | 0.175441 |
| Fzr1          | chr10:81366221-81378516   | 8.9398    | 11.6025   | 0.3761  | 0.076727 |
| Rab3ip        | chr10:116905783-116950380 | 20.6052   | 16.4156   | -0.3279 | 0.082172 |
| Dctn2         | chr10:127266261-127281959 | 41.0623   | 49.5485   | 0.2710  | 0.007918 |
| Tom1l2        | chr11:60226713-60352905   | 4.9795    | 3.7239    | -0.4192 | 0.172255 |
| NA            | chr13:21782914-21783397   | 27.9697   | 46.6856   | 0.7391  | 0.274365 |
| Zfand2a       | chr5:139471210-139484549  | 4.3740    | 6.3022    | 0.5269  | 0.077602 |
| Parp12        | chr6:39086409-39118349    | 7.9548    | 11.0017   | 0.4678  | 0.106619 |
| Atf7ip        | chr6:136518850-136607377  | 34.6431   | 26.8662   | -0.3668 | 0.315915 |
| Gm16174       | chr7:19816552-19818625    | 3.6721    | 8.2266    | 1.1637  | 0.010479 |
| Atp2a1        | chr7:126445857-126463108  | 2.2914    | 1.2416    | -0.8841 | 0.164390 |
| Slc25a22      | chr7:141429738-141437892  | 8.5359    | 6.1513    | -0.4726 | 0.169757 |
| NA            | chr15:76721465-76723845   | 6.2271    | 8.9829    | 0.5286  | 0.003802 |
| Farp1         | chr14:121035199-121283744 | 1.8259    | 2.9369    | 0.6857  | 0.146452 |
| Uqcc2         | chr17:27122662-27133916   | 20.5439   | 30.1643   | 0.5541  | 0.122006 |
| Tmem131       | chr1:36792190-36939527    | 17.5137   | 13.8502   | -0.3386 | 0.223123 |
| Tmem237       | chr1:59100593-59120096    | 2.7947    | 5.2084    | 0.8981  | 0.067504 |
| St8sia4       | chr1:95587683-95667594    | 50.0796   | 60.1129   | 0.2635  | 0.119079 |
| Sfmbt2        | chr2:10370509-10595253    | 2.8907    | 2.1195    | -0.4477 | 0.043714 |
| Anapc1        | chr2:128610103-128687391  | 22.2204   | 19.5485   | -0.1848 | 0.043141 |
| Ube2c         | chr2:164769897-164778822  | 5.5015    | 8.1687    | 0.5703  | 0.124036 |
| Tspan5        | chr3:138742194-138904433  | 5.3142    | 7.3490    | 0.4677  | 0.036609 |
| mt-Tg         | chrM:9390-9458            | 1.6027    | 14.0210   | 3.1290  | 0.161124 |
| Trbj2-4       | chr6:41543361-41543410    | 250.8769  | 125.4739  | -0.9996 | 0.238252 |
| Scarna10      | chr6:125186358-125186683  | 2047.9878 | 2596.5550 | 0.3424  | 0.298343 |
| Dennd5a       | chr7:109893779-109960470  | 11.1924   | 13.5773   | 0.2787  | 0.041256 |
| Eps15l1       | chr8:72341000-72421474    | 23.2473   | 18.6292   | -0.3195 | 0.121758 |
| Psemb10       | chr8:105935727-105938392  | 75.8497   | 93.0963   | 0.2956  | 0.093608 |
| NA            | chr9:85781862-85782663    | 2.3468    | 0.4475    | -2.3907 | 0.162543 |
| Gm14681       | chrX:66778441-66778852    | 10.7949   | 20.1257   | 0.8987  | 0.135133 |
| Bhlhb9        | chrX:135885850-135891081  | 14.5454   | 11.6676   | -0.3181 | 0.005308 |
| 2700060E02Rik | chr14:19811401-19823823   | 33.7071   | 45.0720   | 0.4192  | 0.145087 |
| Msrb2         | chr2:19371439-19394976    | 3.8608    | 6.6866    | 0.7924  | 0.080681 |
| Rabepk        | chr2:34777555-34799912    | 5.8561    | 8.3067    | 0.5043  | 0.098871 |
| Zfp937        | chr2:150218072-150240725  | 1.2233    | 2.2717    | 0.8931  | 0.037223 |
| Gnb4          | chr3:32580331-32616585    | 3.4118    | 2.5567    | -0.4163 | 0.164524 |
| Fam76a        | chr4:132899212-132922558  | 8.5791    | 11.6429   | 0.4405  | 0.055547 |

|               |                           |          |          |         |          |
|---------------|---------------------------|----------|----------|---------|----------|
| Asns          | chr6:7675168-7693254      | 0.3202   | 1.3491   | 2.0749  | 0.087848 |
| Ccr1          | chr9:123962125-123968692  | 0.1057   | 0.5734   | 2.4397  | 0.009246 |
| TdGF1         | chr9:110939609-110946158  | 0.0667   | 0.5312   | 2.9944  | 0.082118 |
| Rab8a         | chr8:72161199-72183904    | 36.8846  | 46.1599  | 0.3236  | 0.127730 |
| Traf6         | chr2:101678428-101701669  | 11.7970  | 9.8736   | -0.2568 | 0.040533 |
| Fxyd5         | chr7:31032721-31042481    | 86.9831  | 101.8149 | 0.2271  | 0.073376 |
| Mvd           | chr8:122433595-122443422  | 17.7799  | 12.3170  | -0.5296 | 0.207697 |
| Sec24b        | chr3:129982758-130061553  | 10.2621  | 7.9237   | -0.3731 | 0.170234 |
| Arnt2         | chr7:84246280-84409959    | 1.1854   | 1.9599   | 0.7255  | 0.099987 |
| Gsta3         | chr1:21240588-21265361    | 3.8552   | 1.7276   | -1.1581 | 0.208966 |
| Zfp775        | chr6:48613179-48623227    | 1.3168   | 2.1676   | 0.7191  | 0.028796 |
| Pdp2          | chr8:104591467-104596836  | 10.0374  | 7.6571   | -0.3905 | 0.049540 |
| Rab8b         | chr9:66843671-66919705    | 62.3077  | 74.1818  | 0.2517  | 0.111494 |
| Grm6          | chr11:50850684-50866208   | 0.4369   | 0.1361   | -1.6825 | 0.130319 |
| Mir142hg      | chr11:87755576-87757270   | 357.3943 | 301.2769 | -0.2464 | 0.029481 |
| Nr1d1         | chr11:98767931-98775333   | 1.6351   | 0.7114   | -1.2006 | 0.146744 |
| Hn1           | chr11:115497352-115514387 | 57.0287  | 70.6348  | 0.3087  | 0.112575 |
| Ppp1r13b      | chr12:111828457-111908055 | 11.2358  | 8.6486   | -0.3776 | 0.152531 |
| Nop16         | chr13:54584184-54590090   | 19.3279  | 14.9814  | -0.3675 | 0.032616 |
| Gm15624       | chr6:83166151-83172733    | 2.4244   | 1.1727   | -1.0479 | 0.065858 |
| 1110004F10Rik | chr7:116093300-116105210  | 32.5493  | 42.3128  | 0.3785  | 0.102692 |
| Ptdss2        | chr7:141122381-141157021  | 3.1813   | 2.0792   | -0.6135 | 0.103430 |
| Rnaseh2a      | chr8:84956609-84969767    | 8.3856   | 10.9886  | 0.3900  | 0.058151 |
| Cul5          | chr9:53614581-53670014    | 17.7655  | 15.0961  | -0.2349 | 0.043218 |
| Rpl14         | chr9:120571516-120574653  | 218.9920 | 284.5819 | 0.3780  | 0.229200 |
| Plec          | chr15:76170973-76232574   | 54.5872  | 43.4331  | -0.3298 | 0.308460 |
| Slc39a4       | chr15:76612384-76616852   | 9.0443   | 12.9103  | 0.5134  | 0.076175 |
| Npff          | chr15:102523842-102524621 | 7.2301   | 2.9816   | -1.2779 | 0.036303 |
| Gm20463       | chr17:34601150-34601576   | 7.8071   | 15.3120  | 0.9718  | 0.030141 |
| Fam86         | chr16:5244151-5255983     | 14.3694  | 11.4121  | -0.3324 | 0.004057 |
| Arl3          | chr19:46531108-46573085   | 4.3637   | 9.0068   | 1.0455  | 0.114272 |
| Dars2         | chr1:161040600-161070658  | 4.3443   | 6.0171   | 0.4699  | 0.081284 |
| Dcaf6         | chr1:165329510-165460465  | 11.2891  | 14.3050  | 0.3416  | 0.012007 |
| 2700094K13Rik | chr2:84669217-84670770    | 19.5377  | 28.6601  | 0.5528  | 0.156018 |
| Jun           | chr4:95049033-95052222    | 2.9783   | 5.5573   | 0.8999  | 0.398117 |
| Efcab14       | chr4:115737743-115777327  | 8.2339   | 6.3999   | -0.3635 | 0.176600 |
| Hyal3         | chr9:107580817-107587359  | 0.1974   | 0.9819   | 2.3145  | 0.010587 |
| Mnda          | chr1:173896354-173912922  | 0.1523   | 0.7942   | 2.3822  | 0.026029 |
| Fam109a       | chr5:121849027-121854599  | 1.3390   | 2.5395   | 0.9234  | 0.012382 |
| Ankrd13b      | chr11:77470484-77489678   | 4.1339   | 2.4412   | -0.7599 | 0.265188 |
| Wbscr22       | chr3:135052956-135064959  | 16.4101  | 13.3097  | -0.3021 | 0.035767 |
| Larp7         | chr3:127536953-127553348  | 37.3475  | 29.7347  | -0.3289 | 0.127486 |
| Tmem50a       | chr4:134897848-134915024  | 88.4861  | 108.7993 | 0.2981  | 0.086070 |
| Ubxn7         | chr16:32332251-32393747   | 19.5203  | 16.8333  | -0.2137 | 0.060434 |
| Snord32a      | chr7:45127381-45127464    | 67.7930  | 129.6402 | 0.9353  | 0.247145 |
| Lad1          | chr1:135818597-135833341  | 18.9265  | 14.3571  | -0.3986 | 0.224578 |
| Ankle1        | chr8:71406009-71409904    | 2.6105   | 4.5409   | 0.7987  | 0.212805 |
| Aspm          | chr1:139454772-139494090  | 7.2565   | 9.2241   | 0.3461  | 0.147691 |
| Thns12        | chr6:71128165-71144346    | 0.3713   | 1.5495   | 2.0612  | 0.022636 |
| Gpr19         | chr6:134869092-134897925  | 4.7602   | 2.9514   | -0.6896 | 0.156670 |
| Serpinc1      | chr1:160978605-161003010  | 1.6964   | 3.6231   | 1.0948  | 0.036475 |
| Pcsk4         | chr10:80321282-80329498   | 2.5461   | 1.2736   | -0.9994 | 0.238717 |
| Calm1         | chr12:100199434-100209806 | 147.1218 | 176.2999 | 0.2610  | 0.128087 |
| Sfswap        | chr5:129501230-129571383  | 30.3338  | 24.5753  | -0.3037 | 0.185128 |
| Vps36         | chr8:22192808-22220843    | 14.5363  | 18.1394  | 0.3195  | 0.030788 |
| Bst2          | chr8:71534263-71537437    | 32.0189  | 44.1278  | 0.4628  | 0.148381 |
| Kif23         | chr9:61917279-61946799    | 7.4979   | 10.4880  | 0.4842  | 0.144709 |
| NA            | chr15:76622087-76626027   | 164.3277 | 194.7455 | 0.2450  | 0.048849 |
| Mrpl49        | chr19:6053629-6057751     | 29.9600  | 24.3069  | -0.3017 | 0.028919 |
| Gm22571       | chr9:64175870-64175941    | 30.5610  | 8.4144   | -1.8608 | 0.008331 |
| D17Wsu92e     | chr17:27751231-27820558   | 29.3701  | 34.6859  | 0.2400  | 0.013428 |
| Csrp1         | chr1:135720060-135752232  | 51.2884  | 63.7704  | 0.3143  | 0.145611 |
| Olf99         | chr17:37279500-37280418   | 3.4660   | 6.4812   | 0.9030  | 0.024453 |
| Midn          | chr10:80148271-80158368   | 14.2000  | 11.0038  | -0.3679 | 0.158110 |
| Slc22a5       | chr11:53864541-53891660   | 5.3216   | 7.2876   | 0.4536  | 0.013210 |
| Ints2         | chr11:86210680-86257575   | 8.0879   | 6.3965   | -0.3385 | 0.237641 |
| Rnft1         | chr11:86484656-86499025   | 10.6476  | 13.4315  | 0.3351  | 0.043516 |
| Fam228b       | chr12:4746215-4769267     | 0.5315   | 0.1459   | -1.8649 | 0.054992 |
| Tubb2a        | chr13:34074300-34078008   | 9.2210   | 6.2001   | -0.5726 | 0.071602 |
| Ssbp2         | chr13:91460282-91703429   | 5.4811   | 4.2974   | -0.3510 | 0.065330 |
| Ndufs4        | chr13:114287794-114388094 | 24.7734  | 33.4155  | 0.4317  | 0.116564 |

|               |                           |          |          |         |          |
|---------------|---------------------------|----------|----------|---------|----------|
| Asic3         | chr5:24413450-24417834    | 2.8297   | 1.3895   | -1.0261 | 0.101820 |
| Pds5b         | chr5:150673738-150810690  | 14.1161  | 11.7310  | -0.2670 | 0.123920 |
| Cic           | chr7:25267703-25294159    | 9.0631   | 6.7288   | -0.4297 | 0.264307 |
| Upf1          | chr8:70331521-70353273    | 39.0952  | 32.1334  | -0.2829 | 0.203250 |
| Tpm4          | chr8:72134974-72153142    | 140.0997 | 162.3248 | 0.2124  | 0.019744 |
| F2rl3         | chr8:72761879-72763874    | 4.0064   | 6.2033   | 0.6307  | 0.008632 |
| Csnk2a2       | chr8:95446095-95488820    | 10.1987  | 8.0680   | -0.3381 | 0.015281 |
| Igsf9b        | chr9:27299227-27334763    | 1.1732   | 0.5287   | -1.1498 | 0.210631 |
| Rpl3          | chr15:80077780-80083406   | 56.4930  | 73.1462  | 0.3727  | 0.192513 |
| Shisa8        | chr15:82206951-82212815   | 0.9126   | 0.1334   | -2.7745 | 0.185729 |
| Celsr1        | chr15:85898757-86033777   | 18.8597  | 14.6744  | -0.3620 | 0.299487 |
| Cgrrf1        | chr14:46832133-46854193   | 1.5998   | 2.8532   | 0.8346  | 0.049774 |
| Rpusd1        | chr17:25727750-25731456   | 3.5502   | 5.6929   | 0.6812  | 0.040989 |
| Glyr1         | chr16:5013905-5049910     | 67.5876  | 59.0864  | -0.1939 | 0.040771 |
| Gm15725       | chr16:37882541-37883631   | 41.4377  | 30.5343  | -0.4405 | 0.211235 |
| Prdm15        | chr16:97791466-97851850   | 6.3909   | 5.0712   | -0.3337 | 0.143608 |
| Coro1b        | chr19:4148618-4154035     | 82.6380  | 98.7770  | 0.2574  | 0.103819 |
| Slc35g1       | chr19:38395979-38405607   | 23.4705  | 18.4438  | -0.3477 | 0.185156 |
| Susd4         | chr1:182763859-182896598  | 0.6148   | 0.0903   | -2.7673 | 0.153113 |
| Npc1          | chr18:12189692-12236400   | 9.2530   | 7.7377   | -0.2580 | 0.074715 |
| Pmaip1        | chr18:66458603-66465550   | 6.3919   | 9.1957   | 0.5247  | 0.088136 |
| Ctdp1         | chr18:80407958-80469695   | 23.3389  | 19.1038  | -0.2889 | 0.130378 |
| Lts3          | chr2:130632838-130642803  | 1.1773   | 0.5469   | -1.1060 | 0.118123 |
| Sys1          | chr2:164456963-164479638  | 8.8954   | 11.7129  | 0.3970  | 0.098606 |
| Zzz3          | chr3:152395472-152462826  | 21.9783  | 18.3735  | -0.2584 | 0.167769 |
| Gm13157       | chr4:147753973-147809788  | 7.5138   | 10.7231  | 0.5131  | 0.122232 |
| Z310040G07Rik | chr5:76928367-76947758    | 1.8044   | 0.4162   | -2.1163 | 0.139327 |
| Ceacam1       | chr7:25461701-25477625    | 0.4609   | 0.0712   | -2.6938 | 0.251310 |
| Gm15551       | chr3:126667328-126669032  | 5.5472   | 1.2047   | -2.2031 | 0.359996 |
| A630014C17Rik | chr11:52276054-52286179   | 3.3100   | 2.0737   | -0.6746 | 0.016448 |
| Gm21781       | chr10:4391586-4396424     | 12.1492  | 9.3235   | -0.3819 | 0.160344 |
| Ddx21         | chr10:62580247-62602298   | 101.6899 | 84.5138  | -0.2669 | 0.282151 |
| Aurkb         | chr11:69045646-69051664   | 9.2014   | 12.3160  | 0.4206  | 0.084271 |
| Z610507B11Rik | chr11:78261751-78290623   | 36.5675  | 32.3109  | -0.1785 | 0.036696 |
| Rps6kb1       | chr11:86498870-86544805   | 16.6542  | 13.8849  | -0.2624 | 0.110944 |
| Bra1          | chr11:101488763-101551955 | 5.8225   | 7.3578   | 0.3376  | 0.088087 |
| Alkbh1        | chr12:87425839-87443839   | 18.4178  | 15.1217  | -0.2845 | 0.131724 |
| Ptpn21        | chr12:98676740-98737405   | 0.5815   | 1.0520   | 0.8552  | 0.030269 |
| Ubr7          | chr12:102757974-102777701 | 23.2063  | 28.7866  | 0.3109  | 0.069788 |
| Gm16085       | chr12:107129680-107132576 | 10.5910  | 5.2191   | -1.0210 | 0.065934 |
| Zfp874a       | chr13:67424548-67451624   | 4.9321   | 6.6343   | 0.4277  | 0.078324 |
| Gm8185        | chr13:76935162-76935831   | 2.8750   | 0.8503   | -1.7576 | 0.132264 |
| Gm7120        | chr13:119487940-119610458 | 0.7158   | 0.2638   | -1.4402 | 0.038356 |
| Abhd1         | chr5:30950065-30955091    | 14.7729  | 10.7819  | -0.4543 | 0.089885 |
| Htt           | chr5:34761739-34912534    | 15.0948  | 12.7656  | -0.2418 | 0.192176 |
| Rest          | chr5:77265490-77286432    | 26.9393  | 23.2451  | -0.2128 | 0.072076 |
| Gcn1l1        | chr5:115565253-115622656  | 13.5842  | 11.4763  | -0.2433 | 0.148609 |
| Psmc9         | chr5:123228189-123250131  | 3.1931   | 4.6476   | 0.5415  | 0.106816 |
| Ints1         | chr5:139751281-139775678  | 20.4162  | 16.1934  | -0.3343 | 0.243077 |
| Ube2h         | chr6:30211288-30304539    | 25.8018  | 21.1249  | -0.2885 | 0.146545 |
| Dnajb1        | chr8:83608174-83611902    | 41.7278  | 34.2002  | -0.2870 | 0.166268 |
| Gm5741        | chr8:85067567-85067982    | 6.4283   | 1.7684   | -1.8620 | 0.065132 |
| Bbs2          | chr8:94067953-94098811    | 2.7081   | 4.3356   | 0.6790  | 0.082454 |
| Dhodh         | chr8:109591342-109608673  | 4.7214   | 3.6367   | -0.3766 | 0.028164 |
| Usp10         | chr8:119910359-119957560  | 14.4901  | 11.9320  | -0.2802 | 0.095326 |
| Zc3h18        | chr8:122376608-122417360  | 13.7570  | 11.5924  | -0.2470 | 0.099051 |
| Cwc15         | chr9:14500616-14510577    | 78.1312  | 99.8770  | 0.3543  | 0.135475 |
| Lrrc49        | chr9:60568858-60688158    | 0.3976   | 0.8669   | 1.1245  | 0.121674 |
| Msn           | chrX:96096041-96168552    | 89.7891  | 76.9239  | -0.2231 | 0.204682 |
| Pdzd11        | chrX:100622882-100626568  | 12.1696  | 16.0920  | 0.4031  | 0.033436 |
| Iitm2a        | chrX:107397098-107403376  | 106.3697 | 64.0578  | -0.7316 | 0.170870 |
| Gpm6b         | chrX:166238910-166388988  | 13.9612  | 18.9414  | 0.4401  | 0.302694 |
| Scrib         | chr15:76047157-76069784   | 18.0748  | 14.9830  | -0.2707 | 0.107314 |
| Grap2         | chr15:80623504-80650559   | 50.1604  | 43.4628  | -0.2068 | 0.023332 |
| Pphln1        | chr15:93398349-93491913   | 14.7887  | 11.7571  | -0.3310 | 0.146151 |
| Tbim6         | chr15:99392881-99410049   | 99.4167  | 114.4809 | 0.2035  | 0.021510 |
| Spaca6        | chr17:17830718-17843009   | 0.5315   | 0.9639   | 0.8589  | 0.071066 |
| Vmn2r96       | chr17:18581726-18598157   | 5.4910   | 3.3931   | -0.6944 | 0.202563 |
| Vmn2r97       | chr17:18914321-18948071   | 1.7774   | 0.7132   | -1.3173 | 0.094688 |
| Rab11b        | chr17:33742483-33760530   | 9.5807   | 7.8577   | -0.2860 | 0.023339 |
| H2-T23        | chr17:36029772-36032855   | 94.0126  | 112.7898 | 0.2627  | 0.134952 |

|               |                           |          |          |         |          |
|---------------|---------------------------|----------|----------|---------|----------|
| 4930404I05Rik | chr16:91011248-91016743   | 11.9041  | 8.9443   | -0.4124 | 0.131589 |
| Arrdc1        | chr2:24925351-24935252    | 34.3457  | 42.1879  | 0.2967  | 0.088545 |
| Cers6         | chr2:68861440-69114282    | 5.7037   | 4.3376   | -0.3950 | 0.141503 |
| Arhgap1       | chr2:91649859-91672326    | 39.5115  | 33.2106  | -0.2506 | 0.150695 |
| Napb          | chr2:148693984-148732467  | 0.6333   | 0.2849   | -1.1527 | 0.092967 |
| Ss18l1        | chr2:180042508-180070201  | 3.8536   | 2.7295   | -0.4976 | 0.020640 |
| Arhgef26      | chr3:62338343-62462221    | 0.6737   | 0.2772   | -1.2810 | 0.208138 |
| Gba           | chr3:89202927-89208681    | 39.4258  | 47.2643  | 0.2616  | 0.002986 |
| Cks1b         | chr3:89415471-89418383    | 9.5509   | 15.1513  | 0.6657  | 0.159249 |
| Gm27008       | chr3:106934381-107093894  | 1.7819   | 0.6749   | -1.4007 | 0.062196 |
| Slc35a1       | chr4:34663256-34687438    | 10.0754  | 7.4947   | -0.4269 | 0.010802 |
| Gm6297        | chr4:40720153-40722398    | 2.3652   | 1.1547   | -1.0344 | 0.033954 |
| Dcdc2b        | chr4:129608330-129614257  | 11.4414  | 7.2524   | -0.6577 | 0.222680 |
| Ccnl2         | chr4:155812488-155824543  | 70.5100  | 62.5638  | -0.1725 | 0.023847 |
| Mrpl23        | chr7:142532798-142540747  | 0.5665   | 1.7266   | 1.6077  | 0.009056 |
| Rab20         | chr8:11453391-11478638    | 1.6255   | 4.4643   | 1.4576  | 0.054836 |
| Cfap53        | chr18:74283089-74359986   | 0.1091   | 0.5452   | 2.3207  | 0.037686 |
| Chrn62        | chr3:89753447-89764632    | 0.6497   | 1.6300   | 1.3270  | 0.102266 |
| Gm20632       | chr3:96239392-96241819    | 0.4406   | 1.3691   | 1.6356  | 0.081377 |
| Themis2       | chr4:132781842-132796387  | 0.6549   | 1.7675   | 1.4324  | 0.030288 |
| Clip3         | chr7:30291671-30308367    | 0.1283   | 0.5360   | 2.0624  | 0.046837 |
| Areg          | chr5:91139614-91148432    | 0.3471   | 1.4072   | 2.0195  | 0.089906 |
| Gm13831       | chr5:115263092-115263394  | 0.3536   | 3.2538   | 3.2018  | 0.251593 |
| Padi4         | chr4:140745864-140774236  | 0.0522   | 0.3581   | 2.7773  | 0.256556 |
| 4930552P12Rik | chr19:55640588-55702204   | 0.0258   | 0.3911   | 3.9240  | 0.329011 |
| Gatsl3        | chr11:4218224-4222409     | 12.5794  | 16.7472  | 0.4129  | 0.012822 |
| Mdh1          | chr11:21556786-21572367   | 59.2443  | 72.5768  | 0.2928  | 0.119659 |
| Bola3         | chr6:83349146-83360136    | 4.4982   | 6.9532   | 0.6283  | 0.198321 |
| 1700123M08Rik | chr4:11966564-11994280    | 0.4407   | 1.9729   | 2.1624  | 0.066243 |
| Slc5a3        | chr16:92058321-92087473   | 12.6263  | 10.3265  | -0.2901 | 0.182306 |
| Rab13         | chr16:37539884-37572385   | 2.5157   | 1.7249   | -0.5445 | 0.056634 |
| Rpp40         | chr13:35893471-35906359   | 2.2486   | 1.4640   | -0.6191 | 0.184284 |
| Slc44a2       | chr9:21337827-21355025    | 105.2522 | 93.2512  | -0.1747 | 0.031541 |
| Cenpj         | chr14:56526760-56571846   | 8.7841   | 6.7947   | -0.3705 | 0.057130 |
| Atp13a3       | chr16:30312422-30388837   | 20.2491  | 17.1945  | -0.2359 | 0.107177 |
| 4930594C11Rik | chr1:37487192-37488982    | 2.2013   | 1.0194   | -1.1107 | 0.083541 |
| Trove2        | chr1:143750789-143777068  | 1.4392   | 2.1896   | 0.6054  | 0.105819 |
| Rxra          | chr2:27676439-27762957    | 6.8452   | 8.7508   | 0.3543  | 0.038145 |
| Gm13543       | chr2:37672207-37673003    | 1.5073   | 0.2968   | -2.3443 | 0.193362 |
| Pnck          | chrX:73655993-73660117    | 0.1727   | 0.7470   | 2.1130  | 0.112295 |
| Rfx7          | chr9:72532239-72622937    | 8.2801   | 6.6773   | -0.3104 | 0.104637 |
| Yeats2        | chr16:20141062-20232573   | 12.7347  | 10.7046  | -0.2505 | 0.010216 |
| Rasgef1b      | chr5:99217425-99252927    | 0.5396   | 1.1736   | 1.1209  | 0.064879 |
| Srcap         | chr7:127512026-127536376  | 14.1086  | 10.7253  | -0.3956 | 0.267831 |
| Gm20490       | chr2:173022502-173022956  | 73.8052  | 46.8168  | -0.6567 | 0.203831 |
| Txn1          | chr4:57943372-57956411    | 73.5972  | 96.8021  | 0.3954  | 0.208674 |
| Gm12961       | chr4:111790620-111791670  | 2.3543   | 0.4636   | -2.3444 | 0.263084 |
| Ech1          | chr7:28825216-28832247    | 23.4336  | 29.6241  | 0.3382  | 0.116085 |
| Fastk         | chr5:24438439-24445287    | 20.4801  | 16.9983  | -0.2688 | 0.103752 |
| Gm26165       | chr2:144261588-144261726  | 26.3522  | 9.8011   | -1.4269 | 0.087912 |
| Sf3a1         | chr11:4160349-4182541     | 23.6014  | 19.9033  | -0.2455 | 0.145547 |
| Egr3          | chr14:70077444-70080157   | 2.1142   | 4.2597   | 1.0106  | 0.031411 |
| Rps14         | chr18:60774509-60778546   | 222.0902 | 289.2255 | 0.3810  | 0.287080 |
| D330041H03Rik | chr17:24404648-24414542   | 15.8892  | 12.3859  | -0.3593 | 0.168573 |
| B430306N03Rik | chr17:48316140-48327024   | 1.2879   | 0.7823   | -0.7193 | 0.037686 |
| I830012O16Rik | chr19:34607969-34613401   | 2.2033   | 4.6215   | 1.0687  | 0.223782 |
| Srp68         | chr11:116245165-116274217 | 19.6083  | 15.6292  | -0.3272 | 0.091927 |
| Lztf1l        | chr9:123694415-123717625  | 3.8029   | 4.9952   | 0.3934  | 0.139046 |
| 2810021J22Rik | chr11:58867215-58883288   | 7.8732   | 6.1009   | -0.3679 | 0.038916 |
| Eral1         | chr11:78073375-78080383   | 17.0190  | 13.2877  | -0.3571 | 0.070920 |
| Gm22748       | chr12:17546145-17546281   | 4.1785   | 15.5272  | 1.8937  | 0.018363 |
| Lats2         | chr14:57642076-57758388   | 14.4921  | 17.3350  | 0.2584  | 0.045907 |
| Ipo9          | chr1:135382311-135430499  | 16.4690  | 14.0099  | -0.2333 | 0.109481 |
| Zfp516        | chr18:82910878-83005314   | 0.7975   | 0.4309   | -0.8881 | 0.061615 |
| Apom          | chr17:35128996-35132050   | 0.4813   | 1.9865   | 2.0453  | 0.157892 |
| Hoxb3os       | chr11:96343071-96354691   | 0.0427   | 0.2562   | 2.5854  | 0.176190 |
| Usp2          | chr9:44067020-44095627    | 1.1951   | 0.5179   | -1.2065 | 0.258878 |
| Add1          | chr5:34573663-34632308    | 65.8885  | 58.1559  | -0.1801 | 0.069135 |
| Tbc1d9        | chr8:83165351-83272934    | 0.0561   | 0.2591   | 2.2083  | 0.037728 |
| Mss51         | chr14:20482863-20496901   | 4.6137   | 2.5989   | -0.8280 | 0.190845 |
| Pnn           | chr12:59066918-59074017   | 43.5634  | 36.1279  | -0.2700 | 0.185007 |

|               |                           |          |          |         |          |
|---------------|---------------------------|----------|----------|---------|----------|
| Hmgb1-ps5     | chr3:95530417-95530974    | 0.7285   | 3.5710   | 2.2934  | 0.129313 |
| Aprt          | chr8:122574636-122576907  | 50.6821  | 71.4684  | 0.4958  | 0.178052 |
| Zfp873        | chr10:82058416-82061329   | 9.8706   | 7.0478   | -0.4860 | 0.076900 |
| Efcab11       | chr12:99717530-99883442   | 2.8386   | 1.5110   | -0.9097 | 0.057635 |
| F2r           | chr13:95601803-95618459   | 20.1152  | 25.5813  | 0.3468  | 0.170748 |
| Nipal1        | chr5:72647795-72671078    | 5.4371   | 7.9171   | 0.5421  | 0.144426 |
| Pcyox1        | chr6:86386005-86397150    | 2.2316   | 3.3844   | 0.6008  | 0.054804 |
| Bcl7c         | chr7:127663352-127708933  | 1.3038   | 2.1607   | 0.7288  | 0.091242 |
| Mfrp          | chr9:44101737-44109187    | 1.0996   | 0.4501   | -1.2887 | 0.156109 |
| Rad54l2       | chr9:106688081-106789213  | 8.6211   | 7.1492   | -0.2701 | 0.085348 |
| Car5b         | chrX:163976821-164027997  | 1.5076   | 2.3868   | 0.6628  | 0.177422 |
| Esd           | chr14:74732296-74750765   | 19.3889  | 24.9183  | 0.3620  | 0.126428 |
| Rnpepl1       | chr1:92910782-92924384    | 11.7008  | 9.3548   | -0.3228 | 0.226684 |
| Adipor1       | chr1:134415377-134433351  | 21.1694  | 25.8940  | 0.2906  | 0.105109 |
| Tmco1         | chr1:167308669-167333978  | 6.3184   | 8.7258   | 0.4657  | 0.116304 |
| Pfkfb3        | chr2:11471429-11502101    | 10.4245  | 8.6917   | -0.2623 | 0.044565 |
| Cd302         | chr2:60251992-60284488    | 0.8572   | 2.1500   | 1.3266  | 0.046252 |
| Lgr4          | chr2:109917646-110014257  | 0.2992   | 0.0417   | -2.8419 | 0.151771 |
| Ndufaf1       | chr2:119655445-119662827  | 11.6680  | 16.4050  | 0.4916  | 0.099533 |
| Ecm1          | chr3:95734146-95739569    | 11.5292  | 8.5740   | -0.4272 | 0.089495 |
| Plekho1       | chr3:95988428-95996001    | 5.2633   | 8.1726   | 0.6348  | 0.158991 |
| Ago1          | chr4:126435011-126468583  | 11.7200  | 9.6541   | -0.2798 | 0.097934 |
| Extl1         | chr4:134356371-134383850  | 0.1728   | 0.4660   | 1.4310  | 0.008877 |
| A830005F24Rik | chr13:48513569-48514859   | 0.4947   | 1.9485   | 1.9776  | 0.013415 |
| Pim1          | chr17:29490811-29495445   | 152.4123 | 182.7885 | 0.2622  | 0.160581 |
| D130040H23Rik | chr8:69300775-69303162    | 9.9529   | 14.1811  | 0.5108  | 0.034622 |
| Gm26528       | chr10:22281453-22281736   | 12.0983  | 5.3540   | -1.1761 | 0.077303 |
| Mir1896       | chr13:21445159-21445240   | 151.3837 | 100.1817 | -0.5956 | 0.070416 |
| Ggcx          | chr6:72414307-72430712    | 6.9847   | 4.9679   | -0.4915 | 0.143766 |
| Leng8         | chr7:4137038-4148173      | 33.3437  | 27.0673  | -0.3009 | 0.308076 |
| Ndufab1       | chr7:122085402-122101886  | 4.1549   | 3.0315   | -0.4548 | 0.129095 |
| Gdpd3         | chr7:126766413-126775643  | 3.2605   | 1.4463   | -1.1727 | 0.041094 |
| Gm17435       | chr8:72492933-72505499    | 2.4206   | 1.4634   | -0.7260 | 0.010771 |
| Mon1b         | chr8:113635585-113645178  | 10.5984  | 13.2964  | 0.3272  | 0.061639 |
| Ccdc12        | chr9:110656502-110711590  | 27.2100  | 36.6798  | 0.4309  | 0.066246 |
| Lamp2         | chrX:38401356-38456454    | 6.9328   | 8.6727   | 0.3230  | 0.082822 |
| Suv420h1      | chr19:3767420-3818303     | 19.7046  | 16.7764  | -0.2321 | 0.165732 |
| Thns1         | chr2:21205723-21215009    | 2.1876   | 1.2712   | -0.7831 | 0.113676 |
| Scand1        | chr2:156311846-156312704  | 50.6518  | 70.8952  | 0.4851  | 0.279258 |
| Chd1l         | chr3:97560741-97610203    | 27.0085  | 22.1967  | -0.2831 | 0.109538 |
| Wdr3          | chr3:100138179-100162407  | 25.5168  | 21.4675  | -0.2493 | 0.119439 |
| Bspry         | chr4:62480052-62497298    | 2.7790   | 4.4656   | 0.6843  | 0.069642 |
| Cxcl16        | chr11:70453982-70459984   | 0.2831   | 0.9052   | 1.6771  | 0.044169 |
| Mcc           | chr18:44425060-44812182   | 0.0913   | 0.3653   | 2.0001  | 0.022870 |
| Abi1          | chr2:22940072-23040241    | 49.9033  | 58.2796  | 0.2239  | 0.028231 |
| NA            | chr1:133131179-133131782  | 26.6629  | 17.4734  | -0.6097 | 0.140213 |
| Exoc3         | chr13:74169804-74208700   | 24.3553  | 29.5430  | 0.2786  | 0.084611 |
| Ube2d2a       | chr18:35771558-35807172   | 21.6659  | 17.1678  | -0.3357 | 0.101218 |
| Pla2g4f       | chr2:120299956-120314165  | 2.0271   | 3.5629   | 0.8136  | 0.198820 |
| D230022J07Rik | chr2:73386969-73420498    | 0.7643   | 2.2172   | 1.5365  | 0.062926 |
| Spc24         | chr9:21755441-21760286    | 7.6002   | 12.2148  | 0.6845  | 0.101988 |
| Sep15         | chr3:144570303-144597680  | 54.9473  | 71.6758  | 0.3834  | 0.209092 |
| Ccdc171       | chr4:83525544-83864670    | 3.7867   | 5.2649   | 0.4754  | 0.101150 |
| Gnptab        | chr10:88379131-88447329   | 10.3936  | 8.6250   | -0.2691 | 0.027595 |
| Gpr132        | chr12:112850875-112860916 | 37.7232  | 30.4588  | -0.3086 | 0.216380 |
| Ifng          | chr10:118441046-118445892 | 6.2457   | 10.1865  | 0.7057  | 0.101133 |
| Tbc1d23       | chr16:57168865-57231466   | 12.2617  | 15.6655  | 0.3534  | 0.092408 |
| Ogfr          | chr2:180589244-180595836  | 42.2886  | 50.7290  | 0.2625  | 0.078696 |
| Vps41         | chr13:18717291-18866809   | 31.8428  | 38.3175  | 0.2670  | 0.040034 |
| D8Erd738e     | chr8:84246236-84249761    | 81.8646  | 105.5727 | 0.3669  | 0.125701 |
| Inpp4a        | chr1:37299864-37410736    | 8.4332   | 6.8298   | -0.3042 | 0.096204 |
| Spg11         | chr2:122053519-122118386  | 13.2355  | 11.3784  | -0.2181 | 0.015163 |
| Tgs1          | chr4:3574874-3616619      | 8.9855   | 6.8619   | -0.3890 | 0.208162 |
| Ptp4a2        | chr4:129811218-129850003  | 105.2770 | 124.7369 | 0.2447  | 0.142354 |
| Gm11906       | chr4:24966516-25271099    | 2.6055   | 6.5861   | 1.3379  | 0.060499 |
| Slc25a37      | chr14:69241850-69285103   | 8.7841   | 6.8144   | -0.3663 | 0.101433 |
| Orai2         | chr5:136147463-136170656  | 16.4750  | 20.7071  | 0.3299  | 0.132462 |
| Prkx          | chrX:77761410-77796278    | 12.3752  | 9.4811   | -0.3843 | 0.291658 |
| Mta1          | chr12:113098277-113137206 | 24.1808  | 19.3156  | -0.3241 | 0.146682 |
| Sptbn1        | chr11:30099394-30268175   | 36.9559  | 32.7387  | -0.1748 | 0.087160 |
| Fam196b       | chr11:34314821-34422640   | 13.1690  | 9.4498   | -0.4788 | 0.366397 |

|               |                           |           |           |         |          |
|---------------|---------------------------|-----------|-----------|---------|----------|
| Taf15         | chr11:83473085-83506743   | 11.0695   | 8.3444    | -0.4077 | 0.124419 |
| Prkch         | chr12:73584796-73778185   | 125.8210  | 144.6718  | 0.2014  | 0.055164 |
| Naip5         | chr13:100211738-100246323 | 2.0886    | 3.6054    | 0.7876  | 0.201775 |
| Mvk           | chr5:114444268-114460591  | 3.1465    | 4.8344    | 0.6196  | 0.085665 |
| Gtf2i         | chr5:134237833-134314760  | 20.7954   | 18.1290   | -0.1980 | 0.017457 |
| Rbm28         | chr6:29123572-29165006    | 19.5949   | 16.0678   | -0.2863 | 0.202600 |
| Rny1          | chr6:47788068-47788180    | 19.1832   | 52.5764   | 1.4546  | 0.460768 |
| Arpc4         | chr6:113378112-113390448  | 79.6176   | 96.2882   | 0.2743  | 0.129063 |
| Pparg         | chr6:115361220-115490401  | 0.5906    | 1.5229    | 1.3664  | 0.028438 |
| Il4ra         | chr7:125552281-125579472  | 63.0119   | 55.0106   | -0.1959 | 0.109898 |
| Gm16568       | chr9:15330572-15335345    | 19.6062   | 14.8801   | -0.3979 | 0.118818 |
| Atm           | chr9:53439148-53536740    | 33.5704   | 29.4105   | -0.1909 | 0.066949 |
| Gm20661       | chr9:107983057-107995007  | 2.6127    | 4.6432    | 0.8296  | 0.076545 |
| Srpk3         | chrX:73774404-73778925    | 0.9620    | 1.8008    | 0.9045  | 0.008438 |
| Rpl10a        | chr17:28328470-28331032   | 32.7665   | 27.0398   | -0.2771 | 0.104870 |
| Mapk14        | chr17:28691341-28748404   | 27.9323   | 23.9978   | -0.2190 | 0.045756 |
| Hnrnpm        | chr17:33646232-33686860   | 72.3563   | 64.0701   | -0.1755 | 0.059755 |
| Mut           | chr17:40934684-40961989   | 12.2767   | 9.7198    | -0.3369 | 0.096877 |
| Zfp318        | chr17:46383730-46420920   | 5.8572    | 4.7452    | -0.3037 | 0.054803 |
| Gm26749       | chr17:74575380-74617119   | 28.8531   | 23.4293   | -0.3004 | 0.088761 |
| Cpsf7         | chr19:10525243-10547735   | 34.8667   | 29.0317   | -0.2642 | 0.180070 |
| Ak3           | chr19:29020832-29047961   | 23.7556   | 29.0404   | 0.2898  | 0.063093 |
| Slc18a2       | chr19:59260877-59296012   | 4.3635    | 3.0043    | -0.5385 | 0.116622 |
| Ikake         | chr1:131254342-131279606  | 38.3468   | 33.6293   | -0.1894 | 0.104651 |
| Surf2         | chr2:26916366-26920183    | 19.2517   | 15.8949   | -0.2764 | 0.061584 |
| Sptan1        | chr2:29965559-30031451    | 85.6078   | 75.1363   | -0.1882 | 0.173854 |
| Fam73b        | chr2:30364232-30385521    | 4.4223    | 3.2953    | -0.4244 | 0.149042 |
| Gm22009       | chr3:69085104-69085447    | 2459.2139 | 3094.0374 | 0.3313  | 0.329023 |
| Ankrd6        | chr4:32804034-32950841    | 2.4260    | 3.4759    | 0.5188  | 0.068995 |
| Ubr4          | chr4:139352608-139489588  | 28.6560   | 24.1909   | -0.2444 | 0.265806 |
| Rcc2          | chr4:140700540-140723220  | 66.2465   | 57.6562   | -0.2004 | 0.116255 |
| B630019K06Rik | chrX:8892381-8894963      | 0.0993    | 0.5674    | 2.5139  | 0.179717 |
| Gm11531       | chr11:96392111-96392666   | 0.4301    | 1.8194    | 2.0809  | 0.000793 |
| Adam12        | chr7:133883198-134232146  | 0.0166    | 0.1498    | 3.1765  | 0.185569 |
| Gm21596       | chr2:113919246-113920562  | 0.2295    | 0.9781    | 2.0913  | 0.198406 |
| Gm26824       | chr10:39864858-39866332   | 3.0267    | 1.1014    | -1.4584 | 0.078799 |
| Natd1         | chr11:60902245-60914750   | 2.6022    | 4.1945    | 0.6888  | 0.146978 |
| Rps6ka5       | chr12:100549777-100725028 | 3.2164    | 4.4626    | 0.4725  | 0.017290 |
| Opa3          | chr7:19228333-19256543    | 9.2367    | 6.8165    | -0.4384 | 0.235866 |
| Snx22         | chr9:66065175-66069731    | 56.7184   | 68.8820   | 0.2803  | 0.156569 |
| Trac          | chr14:54220520-54223097   | 762.1845  | 894.3931  | 0.2308  | 0.106085 |
| Itpr3         | chr17:27057303-27122223   | 25.4948   | 21.4149   | -0.2516 | 0.222376 |
| Rgl2          | chr17:33929542-33937687   | 27.4043   | 22.5070   | -0.2840 | 0.218061 |
| Ccnd3         | chr17:47505050-47599691   | 19.8317   | 16.2108   | -0.2908 | 0.261132 |
| Eif3a         | chr19:60761115-60790693   | 106.8446  | 91.9688   | -0.2163 | 0.213368 |
| Aff3          | chr1:38177325-38664955    | 17.5724   | 14.6630   | -0.2611 | 0.139099 |
| Gm13456       | chr2:40555751-40557116    | 41.4291   | 51.5784   | 0.3161  | 0.056338 |
| Stk39         | chr2:68210444-68472268    | 12.5924   | 15.5994   | 0.3089  | 0.087979 |
| Plcb4         | chr2:135659010-136014593  | 3.1991    | 4.1582    | 0.3783  | 0.043082 |
| Pdzk1         | chr3:96829283-96870926    | 1.6509    | 0.9365    | -0.8180 | 0.020358 |
| Orm2          | chr4:63362448-63365878    | 10.1379   | 5.7392    | -0.8208 | 0.113526 |
| Gm26491       | chr2:10475499-10475620    | 10.7467   | 1.7037    | -2.6571 | 0.106736 |
| 4930451G09Rik | chr16:4968935-4978962     | 0.0705    | 0.4436    | 2.6530  | 0.149560 |
| Ncln          | chr10:81486248-81496392   | 35.2328   | 28.9561   | -0.2831 | 0.210475 |
| Zef1          | chr11:72796225-72927120   | 17.0302   | 14.1337   | -0.2690 | 0.279822 |
| Klrb1b        | chr6:128813705-128826331  | 1.5708    | 0.5415    | -1.5366 | 0.121920 |
| Cnot1         | chr8:95719450-95807462    | 56.7750   | 49.5830   | -0.1954 | 0.125996 |
| Prickle3      | chrX:7657259-7668186      | 5.4091    | 3.7153    | -0.5419 | 0.264828 |
| Tnfsf10       | chr3:27317027-27342427    | 14.8769   | 18.1657   | 0.2881  | 0.072815 |
| Msmg          | chr4:43583215-43584494    | 14.5761   | 9.1094    | -0.6782 | 0.095420 |
| Gm24134       | chr2:26912529-26912600    | 6.9172    | 30.2370   | 2.1281  | 0.021746 |
| Kcnb1         | chr2:167103377-167190155  | 0.1608    | 0.5999    | 1.8996  | 0.095916 |
| Kmt2c         | chr5:25271797-25498783    | 13.6977   | 11.0163   | -0.3143 | 0.329849 |
| Fhl3          | chr4:124700700-124708611  | 4.6608    | 7.4640    | 0.6794  | 0.140740 |
| Dctn3         | chr4:41714797-41723170    | 27.7670   | 35.8493   | 0.3686  | 0.043131 |
| Snappc1       | chr12:73964529-73984820   | 13.9534   | 10.8795   | -0.3590 | 0.028565 |
| Cd38          | chr5:43868808-43912375    | 5.7334    | 8.0052    | 0.4815  | 0.102984 |
| Ccnd1         | chr7:144929930-144939869  | 0.8620    | 1.5387    | 0.8360  | 0.056525 |
| Ndufb9        | chr15:58933809-58939489   | 82.4436   | 105.8147  | 0.3601  | 0.153642 |
| Psmb1         | chr17:15475720-15498276   | 127.9790  | 163.9959  | 0.3578  | 0.222089 |
| Smtn          | chr11:3517522-3540612     | 1.5244    | 0.8056    | -0.9200 | 0.083582 |

|               |                           |         |         |         |          |
|---------------|---------------------------|---------|---------|---------|----------|
| Tnrc18        | chr5:142750379-142817662  | 5.4070  | 3.9443  | -0.4550 | 0.219149 |
| Gm15708       | chr5:144277060-144280513  | 8.6692  | 5.9526  | -0.5424 | 0.111555 |
| Spr           | chr6:85133677-85137766    | 15.0525 | 20.3445 | 0.4346  | 0.057266 |
| Rrm1          | chr7:102441694-102469771  | 37.7034 | 44.1953 | 0.2292  | 0.036019 |
| Snord68       | chr8:123103037-123103123  | 39.5156 | 17.1751 | -1.2021 | 0.045957 |
| Pvrl1         | chr9:43744575-43807454    | 0.7564  | 0.3282  | -1.2046 | 0.130645 |
| Gm26798       | chr15:89211558-89215012   | 1.8629  | 0.9522  | -0.9683 | 0.156718 |
| Racgap1       | chr15:99620495-99651656   | 9.1385  | 11.5553 | 0.3385  | 0.151155 |
| Gm10101       | chr14:46829108-46832027   | 4.5513  | 3.0686  | -0.5687 | 0.065540 |
| Rrp12         | chr19:41862851-41896153   | 17.7774 | 14.2346 | -0.3206 | 0.215126 |
| Tbc1d8        | chr1:39371498-39478747    | 5.8353  | 4.3722  | -0.4165 | 0.114169 |
| Gm17036       | chr18:6213912-6227324     | 48.0750 | 29.7246 | -0.6936 | 0.220872 |
| Pdhx          | chr2:103021074-103073513  | 4.0926  | 6.3109  | 0.6248  | 0.127617 |
| Pdzk1ip1      | chr4:115088707-115093899  | 2.0355  | 4.1124  | 1.0146  | 0.276346 |
| Ndufb3        | chr1:58586383-58595964    | 19.7922 | 32.6607 | 0.7226  | 0.141626 |
| Pdcl          | chr2:37350073-37359332    | 11.0991 | 14.5661 | 0.3922  | 0.161968 |
| Mettl7a1      | chr15:100304816-100314348 | 2.9328  | 4.8367  | 0.7217  | 0.060884 |
| Tpx2          | chr2:152847963-152895321  | 13.9752 | 18.0601 | 0.3699  | 0.231310 |
| Mad2l2        | chr4:148130383-148145699  | 5.8867  | 3.9533  | -0.5744 | 0.164498 |
| Apc-ps1       | chr5:76196624-76197094    | 0.5767  | 2.4544  | 2.0895  | 0.154552 |
| Map1s         | chr8:70905973-70917526    | 12.6417 | 9.1602  | -0.4647 | 0.240359 |
| Lacc1         | chr14:77024199-77036904   | 0.2836  | 0.7494  | 1.4020  | 0.053503 |
| Zfp7          | chr15:76879258-76892392   | 17.0516 | 13.5222 | -0.3346 | 0.110691 |
| 5031439G07Rik | chr15:84943935-84988551   | 3.8390  | 2.9696  | -0.3705 | 0.128811 |
| Gadd45b       | chr10:80930090-80932204   | 28.1124 | 38.6252 | 0.4583  | 0.161518 |
| Cdr2          | chr7:120957035-120982312  | 4.6306  | 2.9550  | -0.6480 | 0.100883 |
| Tmprss13      | chr9:45319099-45347581    | 3.3889  | 4.9956  | 0.5598  | 0.133707 |
| Acaa1a        | chr9:119339675-119350299  | 12.8497 | 10.4998 | -0.2914 | 0.068138 |
| Gm8369        | chr19:11492037-11512577   | 14.4723 | 20.8396 | 0.5260  | 0.127406 |
| Slc2a4rg-ps   | chr2:181384249-181387586  | 43.9438 | 37.3165 | -0.2358 | 0.111080 |
| 5830411N06Rik | chr7:140247300-140299791  | 0.0539  | 0.4144  | 2.9420  | 0.240981 |
| Ercc6         | chr14:32513520-32580989   | 16.2274 | 14.0426 | -0.2086 | 0.040485 |
| Frs2          | chr10:117070128-117148474 | 5.5759  | 4.3874  | -0.3458 | 0.028067 |
| Znrf3         | chr11:5276323-5444847     | 4.2430  | 3.3183  | -0.3546 | 0.052333 |
| 1810032O08Rik | chr11:116671659-116675799 | 7.6581  | 5.5753  | -0.4579 | 0.094834 |
| 0610040F04Rik | chr6:108577038-108660934  | 0.4525  | 1.4560  | 1.6859  | 0.116819 |
| Ndufaf5       | chr2:140170648-140203689  | 11.6928 | 8.6306  | -0.4381 | 0.076198 |
| Pdzd7         | chr19:45026905-45046614   | 0.0775  | 0.3264  | 2.0739  | 0.008507 |
| Mx2           | chr16:97536082-97560899   | 3.4297  | 6.5515  | 0.9337  | 0.181141 |
| mt-Tq         | chrM:3771-3842            | 31.2511 | 11.1883 | -1.4819 | 0.013197 |
| Eaf1          | chr14:31495078-31509858   | 20.3398 | 17.2204 | -0.2402 | 0.047762 |
| Nrip1         | chr16:76287399-76373827   | 31.3388 | 27.4665 | -0.1903 | 0.106617 |
| Mat2b         | chr11:40679313-40695203   | 23.5650 | 28.5615 | 0.2774  | 0.099880 |
| Slc26a10      | chr10:127172425-127180645 | 4.7584  | 2.9900  | -0.6703 | 0.081051 |
| Mad1l1        | chr5:140008688-140321552  | 13.8416 | 11.2852 | -0.2946 | 0.026757 |
| Taf5          | chr19:47067747-47083479   | 8.9700  | 12.0441 | 0.4251  | 0.115934 |
| Pnlsr         | chr4:21847582-21876475    | 40.3274 | 35.4041 | -0.1878 | 0.105698 |
| Lgals12       | chr19:7596659-7607193     | 0.0386  | 0.3436  | 3.1541  | 0.184231 |
| NA            | chr6:136608858-136610870  | 17.8641 | 13.2244 | -0.4339 | 0.265795 |
| Ube2t         | chr1:134962564-134974162  | 2.5206  | 4.5937  | 0.8659  | 0.074422 |
| Zfp710        | chr7:80024813-80092751    | 7.8267  | 5.7898  | -0.4349 | 0.224566 |
| Pold4         | chr19:4231898-4233631     | 37.8512 | 47.6414 | 0.3319  | 0.029072 |
| Gm14097       | chr2:132694431-132698523  | 3.0677  | 0.6447  | -2.2505 | 0.038389 |
| Gpn1          | chr5:31494740-31512903    | 5.9643  | 4.7410  | -0.3312 | 0.111801 |
| Gm26606       | chr4:123898632-123904842  | 0.4565  | 0.0922  | -2.3069 | 0.006723 |
| Rdh1          | chr10:127759720-127768297 | 0.0599  | 0.3283  | 2.4554  | 0.034639 |
| Clbn12        | chr5:5505014-5514958      | 0.9240  | 2.1387  | 1.2108  | 0.084992 |
| Gm26692       | chr5:107659096-107688015  | 5.9839  | 3.4109  | -0.8109 | 0.070771 |
| Abhd4         | chr14:54254128-54269169   | 5.6125  | 7.8255  | 0.4795  | 0.069503 |
| Med10         | chr13:69809881-69816094   | 26.2695 | 39.9795 | 0.6059  | 0.226673 |
| Cd200r4       | chr16:44811732-44839150   | 1.8787  | 3.2199  | 0.7773  | 0.021987 |
| Gm10571       | chr4:129855070-129856710  | 2.5653  | 1.2187  | -1.0738 | 0.052467 |
| Gm22513       | chr12:54696781-54696945   | 12.3517 | 32.7241 | 1.4056  | 0.325118 |
| Klrk1         | chr6:129610322-129623864  | 0.4174  | 1.0649  | 1.3512  | 0.079225 |
| Ogdh          | chr11:6291632-6356642     | 39.3287 | 34.5804 | -0.1856 | 0.054105 |
| Mbtps2        | chrX:157535370-157598715  | 3.0761  | 2.4103  | -0.3519 | 0.041933 |
| Ndufc1        | chr3:51404676-51408988    | 5.7036  | 8.8760  | 0.6380  | 0.095581 |
| Slc25a20      | chr9:108662097-108684641  | 20.0458 | 25.6036 | 0.3530  | 0.056728 |
| NA            | chr9:108648839-108650953  | 0.2425  | 1.0576  | 2.1246  | 0.087574 |
| Eif1          | chr11:100319884-100322096 | 13.2071 | 17.7382 | 0.4255  | 0.204055 |
| Nomo1         | chr7:46033697-46084212    | 13.6328 | 11.2317 | -0.2795 | 0.157348 |



|               |                           |          |          |         |          |
|---------------|---------------------------|----------|----------|---------|----------|
| Arid5a        | chr1:36307732-36324029    | 18.5076  | 15.7046  | -0.2369 | 0.155358 |
| Gtf2b         | chr3:142765225-142783603  | 34.9773  | 45.7660  | 0.3879  | 0.170556 |
| St14          | chr9:31089401-31131853    | 1.9150   | 3.0294   | 0.6617  | 0.081632 |
| Gm6787        | chrX:8097086-8106701      | 0.8801   | 0.1147   | -2.9394 | 0.109313 |
| Dennd4b       | chr3:90265184-90280669    | 22.3166  | 18.1801  | -0.2958 | 0.274186 |
| Rapgef4os1    | chr2:72097602-72148796    | 1.9952   | 0.2559   | -2.9632 | 0.113642 |
| Fam174a       | chr1:95313627-95335284    | 5.9104   | 9.0703   | 0.6179  | 0.137783 |
| 2410004P03Rik | chr12:17004957-17011727   | 0.1545   | 0.8055   | 2.3823  | 0.094902 |
| Mir686        | chr14:54616676-54616785   | 60.7709  | 93.0480  | 0.6146  | 0.024639 |
| Tmem183a      | chr1:134346096-134361999  | 19.8550  | 24.1581  | 0.2830  | 0.026983 |
| Slc4a7        | chr14:14703024-14799943   | 27.8788  | 33.5223  | 0.2660  | 0.142820 |
| Gm25360       | chr1:72226239-72226430    | 43.9791  | 77.2238  | 0.8122  | 0.360808 |
| Pwwp2a        | chr11:43681997-43721491   | 10.0567  | 7.7467   | -0.3765 | 0.266673 |
| Golm1         | chr13:59634995-59675784   | 13.6485  | 17.1450  | 0.3290  | 0.086674 |
| Zfp827        | chr8:79028436-79193766    | 5.2110   | 4.0662   | -0.3579 | 0.184913 |
| Zfp707        | chr15:75969122-75975868   | 7.2757   | 5.5092   | -0.4012 | 0.030946 |
| Copz1         | chr15:103272910-103299862 | 36.7329  | 29.4387  | -0.3194 | 0.158354 |
| Sugt1         | chr14:79587690-79629755   | 30.7969  | 38.2234  | 0.3117  | 0.076858 |
| Ppard         | chr17:28232753-28301469   | 1.8391   | 1.0763   | -0.7729 | 0.186450 |
| Yif1a         | chr19:5088537-5092879     | 11.9171  | 17.3650  | 0.5431  | 0.109562 |
| Cd52          | chr4:134082447-134095082  | 476.1910 | 579.6526 | 0.2836  | 0.236140 |
| Ginm1         | chr10:7767946-7792800     | 12.0787  | 16.1309  | 0.4174  | 0.064127 |
| Scarna13      | chr12:105031074-105031349 | 489.9987 | 607.2616 | 0.3095  | 0.228602 |
| Crot          | chr5:8966032-8997324      | 11.9076  | 14.9207  | 0.3254  | 0.109164 |
| Abhd10        | chr16:45729724-45742955   | 4.1777   | 5.6475   | 0.4349  | 0.010754 |
| 4932438A13Rik | chr3:36863105-37053033    | 20.5687  | 17.6205  | -0.2232 | 0.231567 |
| Rd3           | chr1:19197372-191988282   | 0.0401   | 0.2508   | 2.6437  | 0.072065 |
| Ccdc43        | chr11:102684685-102697782 | 11.3897  | 8.9123   | -0.3539 | 0.082193 |
| Inf2          | chr12:112588783-112615556 | 3.5225   | 4.9469   | 0.4899  | 0.130616 |
| Cd37          | chr7:45233631-45239115    | 32.7150  | 38.5204  | 0.2357  | 0.037228 |
| Pdk3          | chrX:93764606-93832201    | 15.3488  | 19.5357  | 0.3480  | 0.077645 |
| Myo9a         | chr9:59750895-59928866    | 12.9696  | 10.6699  | -0.2816 | 0.251935 |
| Gm11769       | chr11:120150561-120152341 | 1.9745   | 3.4536   | 0.8066  | 0.006386 |
| Fam192a       | chr8:94574942-94601726    | 30.3281  | 37.1779  | 0.2938  | 0.037295 |
| Nrbp2         | chr15:76085594-76090013   | 3.1605   | 5.4224   | 0.7787  | 0.241099 |
| Rac2          | chr15:78559168-78572783   | 201.9406 | 241.5843 | 0.2586  | 0.230294 |
| Lactb2        | chr1:13624844-13660546    | 13.0984  | 10.5396  | -0.3136 | 0.046841 |
| 5033417F24Rik | chr1:92908379-92910764    | 4.1271   | 2.4741   | -0.7382 | 0.027227 |
| Pcna          | chr2:132249161-132253314  | 55.3040  | 64.6873  | 0.2261  | 0.022111 |
| Zmynd11       | chr13:9684835-9765321     | 22.7354  | 19.6833  | -0.2080 | 0.100811 |
| Gm16984       | chr13:34963981-34990452   | 3.7117   | 6.2441   | 0.7504  | 0.007176 |
| Zfp513        | chr5:31198980-31202303    | 14.7139  | 10.6614  | -0.4648 | 0.247165 |
| Kdm7a         | chr6:39136622-39206789    | 21.5914  | 18.9641  | -0.1872 | 0.060664 |
| Dhdh          | chr7:45472955-45488805    | 0.7416   | 1.4834   | 1.0003  | 0.162137 |
| Styx          | chr14:45351472-45373585   | 3.7996   | 1.2636   | -1.5883 | 0.113351 |
| Akap11        | chr14:78492245-78536860   | 22.9222  | 19.5822  | -0.2272 | 0.160876 |
| Rps6ka2       | chr17:7170114-7303313     | 0.9774   | 0.5058   | -0.9503 | 0.108089 |
| Nsl1          | chr1:191063011-191084558  | 2.7058   | 3.8750   | 0.5181  | 0.001559 |
| Tmem132a      | chr19:10857821-10869940   | 0.1684   | 0.6019   | 1.8378  | 0.151429 |
| Ift52         | chr2:163017353-163046141  | 16.6349  | 13.6092  | -0.2896 | 0.039953 |
| Dyrk2         | chr10:118859348-118868903 | 20.4592  | 16.5251  | -0.3081 | 0.048090 |
| Pex13         | chr11:23646478-23665959   | 4.1737   | 5.9318   | 0.5071  | 0.140688 |
| Gm26587       | chr13:67660456-67661445   | 4.2713   | 2.2984   | -0.8941 | 0.003921 |
| Sumf2         | chr5:129846989-129864050  | 6.2815   | 4.4836   | -0.4865 | 0.085446 |
| Scaf1         | chr7:45002947-45016363    | 7.8375   | 6.1896   | -0.3406 | 0.222658 |
| Anapc15       | chr7:101881324-101901845  | 3.7962   | 5.2513   | 0.4681  | 0.080148 |
| Fcho1         | chr8:71708386-71725716    | 43.3178  | 35.9405  | -0.2694 | 0.263775 |
| Sqle          | chr15:59315076-59331192   | 8.7134   | 6.8051   | -0.3566 | 0.196972 |
| Bcdin3d       | chr15:99470083-99474730   | 5.6764   | 9.8104   | 0.7893  | 0.135171 |
| A730061H03Rik | chr14:55559941-55560406   | 5.5494   | 10.7381  | 0.9523  | 0.132765 |
| Gart          | chr16:91621185-91646952   | 47.6085  | 39.2015  | -0.2803 | 0.282284 |
| Zmat2         | chr18:36793922-36799660   | 25.2814  | 34.1526  | 0.4339  | 0.262557 |
| Cebp          | chr2:167688914-167690418  | 6.3233   | 9.9751   | 0.6577  | 0.227288 |
| 1700113A16Rik | chr3:88171559-88177785    | 4.1874   | 7.0610   | 0.7538  | 0.011242 |
| Zfp69         | chr4:120930136-120951699  | 0.9757   | 4.0600   | 2.0570  | 0.013071 |
| Rorc          | chr3:94372793-94398276    | 2.0873   | 3.5219   | 0.7547  | 0.126792 |
| G430095P16Rik | chr8:84723006-84726844    | 7.5546   | 12.1364  | 0.6839  | 0.036299 |
| Cmpk2         | chr12:26469203-26479835   | 8.3769   | 11.2848  | 0.4299  | 0.127530 |
| Gm16267       | chr12:33111961-33138945   | 10.5717  | 6.6861   | -0.6610 | 0.014608 |
| Hist1h2bl     | chr13:21715762-21716143   | 38.9258  | 59.3734  | 0.6091  | 0.288754 |
| Rreb1         | chr13:3778399-37952002    | 1.8256   | 1.3644   | -0.4201 | 0.107179 |

|               |                           |          |          |         |          |
|---------------|---------------------------|----------|----------|---------|----------|
| Gm15975       | chr5:55624187-55625593    | 1.2154   | 0.3961   | -1.6177 | 0.146690 |
| Oas1a         | chr5:120896255-120907521  | 12.0853  | 19.0055  | 0.6532  | 0.297237 |
| NA            | chr7:130834436-130834523  | 52.3840  | 20.3844  | -1.3617 | 0.159827 |
| NA            | chr8:85432685-85433315    | 5.7975   | 2.4176   | -1.2619 | 0.083706 |
| Tbrg1         | chr9:37649181-37657312    | 36.3800  | 42.2768  | 0.2167  | 0.006738 |
| Plscr1        | chr9:92250056-92271975    | 8.4423   | 11.8200  | 0.4855  | 0.056882 |
| Stt3b         | chr9:115242606-115310421  | 37.5392  | 32.7393  | -0.1974 | 0.059000 |
| Arhgef9       | chrX:95048934-95196821    | 0.6205   | 0.3008   | -1.0448 | 0.190343 |
| Cox7b         | chrX:106015699-106022450  | 59.0796  | 79.7917  | 0.4336  | 0.222568 |
| Bin2          | chr15:100641076-100669553 | 166.2721 | 148.1547 | -0.1664 | 0.087591 |
| Dynlt1a       | chr17:6310546-6317474     | 5.0572   | 2.1200   | -1.2543 | 0.143983 |
| B230354K17Rik | chr17:45433851-45442544   | 7.8276   | 6.0583   | -0.3697 | 0.144510 |
| Dlk2          | chr17:46297420-46303271   | 0.5246   | 0.0887   | -2.5649 | 0.199168 |
| Synj1         | chr16:90936091-91011308   | 7.4423   | 5.8760   | -0.3409 | 0.212675 |
| Il10rb        | chr16:91406163-91425834   | 17.5260  | 21.2217  | 0.2760  | 0.048173 |
| Rce1          | chr19:4622550-4625617     | 13.8250  | 19.6771  | 0.5092  | 0.181185 |
| Ikzf2         | chr1:69531213-69685960    | 131.1603 | 155.7165 | 0.2476  | 0.185448 |
| Kdm5b         | chr1:134560170-134632877  | 22.2001  | 19.5428  | -0.1839 | 0.014237 |
| Gm26781       | chr1:136259406-136274406  | 3.4587   | 1.7797   | -0.9586 | 0.035881 |
| Gm9929        | chr1:170868644-170881721  | 8.9860   | 6.1970   | -0.5361 | 0.101122 |
| Paip2         | chr18:35598616-35617186   | 48.4182  | 62.0957  | 0.3589  | 0.228780 |
| Egfl7         | chr2:26580013-26593120    | 0.9538   | 0.3831   | -1.3160 | 0.281644 |
| Med27         | chr2:29346818-29524793    | 4.2855   | 6.1486   | 0.5208  | 0.086084 |
| Ifih1         | chr2:62595797-62646255    | 13.3224  | 16.2588  | 0.2874  | 0.142675 |
| Ampd1         | chr3:103074013-103099714  | 1.9222   | 1.0279   | -0.9031 | 0.132251 |
| B230217C12Rik | chr11:97841292-97844099   | 0.0765   | 0.5304   | 2.7937  | 0.170001 |
| Gm24644       | chr2:104040668-104040807  | 0.9218   | 6.6071   | 2.8415  | 0.138580 |
| Slc6a20b      | chr9:123593819-123632565  | 1.2452   | 0.6933   | -0.8448 | 0.190985 |
| Shmt2         | chr10:127517122-127522444 | 47.1495  | 38.2583  | -0.3015 | 0.264343 |
| Samd9l        | chr6:3372259-3399571      | 128.6782 | 156.6396 | 0.2837  | 0.257249 |
| Xpnpep3       | chr15:81400137-81456807   | 3.8420   | 2.9506   | -0.3809 | 0.025383 |
| Ep300         | chr15:81586213-81652077   | 14.6948  | 11.5592  | -0.3463 | 0.353970 |
| Epha3         | chr16:63543537-63864158   | 0.2772   | 0.0712   | -1.9607 | 0.096211 |
| C030017K20Rik | chr4:155451569-155466530  | 0.8371   | 0.1975   | -2.0837 | 0.350262 |
| Kcnp4         | chr5:48389501-49524904    | 0.6830   | 0.1941   | -1.8153 | 0.156670 |
| Prr14l        | chr5:32789217-32854256    | 17.3324  | 14.9640  | -0.2120 | 0.134410 |
| Alg8          | chr7:97371605-97392153    | 5.8460   | 4.2256   | -0.4683 | 0.027348 |
| 1110008P14Rik | chr2:32377096-32381938    | 8.7148   | 11.3987  | 0.3873  | 0.064907 |
| Strbp         | chr2:37569867-37703859    | 5.7866   | 4.9569   | -0.2233 | 0.062498 |
| Calcl         | chr2:84330625-84425411    | 11.6081  | 14.7529  | 0.3459  | 0.166832 |
| Atpif1        | chr4:132530554-132533659  | 25.1416  | 32.3844  | 0.3652  | 0.129900 |
| Gm15893       | chr11:88356290-88363947   | 4.6203   | 2.1161   | -1.1266 | 0.288522 |
| Akr1c12       | chr13:4268171-4279433     | 4.7086   | 2.5634   | -0.8773 | 0.167917 |
| 6030443J06Rik | chr5:22550436-22807850    | 0.6811   | 0.3630   | -0.9078 | 0.060964 |
| Gramd1b       | chr9:40293232-40531383    | 19.3143  | 16.3034  | -0.2445 | 0.235214 |
| Igf2r         | chr17:12682405-12769664   | 52.3352  | 46.2549  | -0.1782 | 0.117614 |
| Setdb1        | chr3:95323524-95357202    | 19.7864  | 17.1835  | -0.2035 | 0.046021 |
| Il7r          | chr15:9506160-9529876     | 56.2322  | 67.8243  | 0.2704  | 0.155678 |
| Mul1          | chr4:138434670-138442265  | 4.2221   | 5.6490   | 0.4200  | 0.021060 |
| Gm24111       | chr13:48537824-48537921   | 12.4031  | 32.6745  | 1.3975  | 0.344249 |
| Itga7         | chr10:128933812-128958277 | 1.5661   | 2.6625   | 0.7656  | 0.262315 |
| Rwdd3         | chr3:121155399-121171695  | 1.3293   | 0.7658   | -0.7956 | 0.106315 |
| Rbm38         | chr2:173020497-173034734  | 44.1070  | 35.4542  | -0.3150 | 0.305766 |
| Rbbp6         | chr7:122965685-123002557  | 24.0025  | 20.9684  | -0.1950 | 0.106041 |
| Tarbp2        | chr15:102518191-102523676 | 4.6416   | 3.5283   | -0.3956 | 0.016714 |
| Myl12b        | chr17:70973919-70990787   | 101.1105 | 121.5454 | 0.2656  | 0.167661 |
| Arhgap19      | chr19:41766587-41802084   | 4.6456   | 6.3215   | 0.4444  | 0.152923 |
| Gcat          | chr15:79030873-79043558   | 2.3470   | 3.5460   | 0.5954  | 0.104893 |
| 6530409C15Rik | chr6:28215554-28260862    | 7.4848   | 5.3056   | -0.4965 | 0.099377 |
| Tpk1          | chr6:43345000-43666278    | 1.4189   | 2.4441   | 0.7846  | 0.150164 |
| Tob1          | chr11:94211453-94215495   | 9.2160   | 6.9179   | -0.4138 | 0.058124 |
| Slc20a2       | chr8:22476699-22569607    | 4.2726   | 3.0920   | -0.4666 | 0.023524 |
| Kat6b         | chr14:21481433-21672478   | 3.4222   | 2.7659   | -0.3072 | 0.161504 |
| Snx4          | chr16:33251455-33299562   | 50.9968  | 61.6483  | 0.2737  | 0.127738 |
| Zfp273        | chr13:67813739-67827002   | 1.6303   | 2.8816   | 0.8217  | 0.174273 |
| Sbf1          | chr15:89288235-89315311   | 69.3688  | 58.6102  | -0.2431 | 0.291024 |
| Dync1h1       | chr12:110601451-110666945 | 59.4762  | 51.9336  | -0.1956 | 0.233953 |
| Tmem263       | chr10:85102626-85117747   | 9.4054   | 12.1153  | 0.3653  | 0.132378 |
| Atp13a1       | chr8:69791162-69807749    | 41.7743  | 35.8737  | -0.2197 | 0.148213 |
| Kmt2b         | chr7:30568857-30588726    | 12.6962  | 9.8970   | -0.3593 | 0.336753 |
| Pif1          | chr9:65587159-65595967    | 2.4328   | 3.5988   | 0.5649  | 0.147549 |

|               |                           |          |          |         |          |
|---------------|---------------------------|----------|----------|---------|----------|
| Foxo1         | chr3:52268336-52350109    | 20.9169  | 17.6111  | -0.2482 | 0.183440 |
| Mex3d         | chr10:80380354-80387659   | 1.7659   | 2.8466   | 0.6889  | 0.050806 |
| Anapc13       | chr9:102626295-102634241  | 19.0440  | 30.2414  | 0.6672  | 0.153462 |
| Nphp1         | chr2:127740731-127788897  | 0.0553   | 0.4474   | 3.0164  | 0.177888 |
| Lingo4        | chr3:94398516-94404501    | 0.5755   | 0.1408   | -2.0308 | 0.215524 |
| Smyd2         | chr1:189880491-189922363  | 11.5594  | 9.0453   | -0.3538 | 0.093184 |
| Snora44       | chr4:132309940-132310069  | 24.0290  | 46.4940  | 0.9523  | 0.167188 |
| Gm5391        | chrX:68319637-68320250    | 6.8736   | 3.5469   | -0.9545 | 0.055416 |
| A330023F24Rik | chr1:194976374-195037908  | 1.8956   | 2.6448   | 0.4805  | 0.203913 |
| Phtf1os       | chr3:103964535-103968581  | 17.1403  | 14.0694  | -0.2848 | 0.138170 |
| Sec63         | chr10:42761495-42832514   | 11.6676  | 9.9634   | -0.2278 | 0.072722 |
| NA            | chr9:106883984-106887000  | 31.1073  | 25.8209  | -0.2687 | 0.192015 |
| Tcf20         | chr15:82808628-82912134   | 86.2093  | 75.9262  | -0.1832 | 0.187830 |
| Spats2l       | chr1:57774161-57948394    | 0.4004   | 0.1208   | -1.7286 | 0.182321 |
| Med8          | chr4:118409336-118415782  | 22.2843  | 27.0781  | 0.2811  | 0.078688 |
| Nup88         | chr11:70943057-70969973   | 12.9033  | 15.6872  | 0.2818  | 0.118805 |
| Begain        | chr12:109032186-109068217 | 1.3229   | 0.6430   | -1.0407 | 0.107184 |
| Pdcl3         | chr1:38987813-38997236    | 15.6610  | 20.0560  | 0.3569  | 0.038206 |
| Zfp365        | chr10:67886102-67912662   | 1.2557   | 1.9964   | 0.6689  | 0.050619 |
| Naip6         | chr13:100281120-100317674 | 1.5509   | 2.4612   | 0.6662  | 0.228990 |
| Nudt13        | chr14:20294689-20317575   | 2.1235   | 3.4140   | 0.6851  | 0.031638 |
| 4631405J19Rik | chr2:93027955-93044732    | 0.3189   | 0.7712   | 1.2738  | 0.168316 |
| Accs          | chr2:93833466-93849943    | 3.2566   | 4.3463   | 0.4164  | 0.166754 |
| Nat10         | chr2:103721255-103761270  | 14.0933  | 11.8870  | -0.2456 | 0.132122 |
| Efh2          | chr4:141858141-141874920  | 20.3989  | 26.5372  | 0.3795  | 0.241855 |
| Fam222b       | chr11:78094659-78156700   | 2.3448   | 3.4534   | 0.5585  | 0.061080 |
| Gm24191       | chr5:106669998-106670121  | 17.9133  | 4.6861   | -1.9346 | 0.167352 |
| Arl8b         | chr6:108783058-108823723  | 30.7664  | 38.4100  | 0.3201  | 0.187968 |
| A930001C03Rik | chr19:4439002-4448332     | 0.8902   | 0.2030   | -2.1327 | 0.129741 |
| Lekr1         | chr3:65666227-65831159    | 0.3535   | 0.0752   | -2.2325 | 0.134739 |
| Gm26722       | chr4:129309080-129318443  | 23.6267  | 31.2099  | 0.4016  | 0.134068 |
| Pax6          | chr2:105668895-105698410  | 0.0167   | 0.0838   | 2.3229  | 0.078289 |
| Ikbb          | chr8:22659211-22706589    | 14.1632  | 12.3138  | -0.2019 | 0.163220 |
| Gm16315       | chr10:81301700-81302917   | 1.5359   | 0.3626   | -2.0827 | 0.151561 |
| Baz2a         | chr10:128092782-128129303 | 25.8095  | 21.1686  | -0.2860 | 0.337104 |
| Spdl1         | chr11:34809189-34833641   | 3.6253   | 5.5284   | 0.6087  | 0.135696 |
| Tspan13       | chr12:36014556-36042500   | 53.3882  | 64.7336  | 0.2780  | 0.182344 |
| Ripk1         | chr13:34002362-34035170   | 24.6012  | 21.5925  | -0.1882 | 0.024284 |
| Tacc3         | chr5:33658127-33678995    | 13.7446  | 17.2997  | 0.3319  | 0.145070 |
| Guf1          | chr5:69556923-69575972    | 9.3133   | 11.3076  | 0.2799  | 0.107061 |
| Gm20499       | chr5:114809035-114823460  | 16.7645  | 10.4139  | -0.6869 | 0.039594 |
| Polr2j        | chr5:136116630-136122947  | 38.9349  | 50.5992  | 0.3781  | 0.202547 |
| Xrcc1         | chr7:24547149-24573438    | 14.9605  | 18.7905  | 0.3288  | 0.043042 |
| 2200002D01Rik | chr7:29246560-29248432    | 4.4694   | 7.0618   | 0.6600  | 0.097155 |
| Slco3a1       | chr7:74275418-74554780    | 4.9967   | 4.0730   | -0.2949 | 0.045568 |
| Pdf           | chr8:107044697-107048614  | 22.3473  | 17.3894  | -0.3619 | 0.169954 |
| Dpagt1        | chr9:44326844-44333600    | 5.3376   | 7.6290   | 0.5153  | 0.032683 |
| Myo1e         | chr9:70207349-70400067    | 18.6956  | 23.1582  | 0.3088  | 0.163909 |
| Cx3cr1        | chr9:119901615-120068283  | 0.4198   | 0.9344   | 1.1545  | 0.250476 |
| Chm           | chrX:113040594-113185517  | 10.2303  | 13.3374  | 0.3826  | 0.243115 |
| Ppp1r16a      | chr15:76671614-76694919   | 3.8560   | 5.5681   | 0.5301  | 0.193999 |
| Tnrc6b        | chr15:80711318-80941086   | 19.6299  | 16.7756  | -0.2267 | 0.260749 |
| Gm20680       | chr15:100586095-100592037 | 5.7713   | 2.8737   | -1.0060 | 0.140592 |
| Naa60         | chr16:3872374-3904770     | 25.7620  | 21.6756  | -0.2492 | 0.167577 |
| Ercc5         | chr1:44147846-44181260    | 12.2760  | 10.1852  | -0.2694 | 0.055465 |
| Neb1          | chr2:17343908-17731464    | 0.6412   | 0.9900   | 0.6268  | 0.162100 |
| Gar1          | chr3:129824911-129831396  | 7.2992   | 4.8843   | -0.5796 | 0.079623 |
| Zcchc7        | chr4:44755876-44932215    | 17.5191  | 15.2692  | -0.1983 | 0.070099 |
| Tmco4         | chr4:138972887-139059171  | 15.5047  | 19.0854  | 0.2998  | 0.093769 |
| Dnajc11       | chr4:151933690-151982137  | 8.7407   | 7.3534   | -0.2493 | 0.160895 |
| Gm17590       | chr5:3473070-3473178      | 18.1713  | 39.3237  | 1.1137  | 0.084973 |
| Amot1         | chr9:14541965-14615483    | 0.0774   | 0.2420   | 1.6438  | 0.089756 |
| Gm8034        | chr19:6044690-6044822     | 9.3788   | 1.8810   | -2.3179 | 0.103062 |
| Trbj1-2       | chr6:41534000-41534048    | 226.4594 | 147.2789 | -0.6207 | 0.071319 |
| Fiz1          | chr7:5007056-5014697      | 12.6079  | 10.0591  | -0.3258 | 0.061337 |
| Ar            | chrX:98149720-98323215    | 0.7421   | 1.2440   | 0.7452  | 0.144429 |
| Dscam         | chr16:96592078-97170752   | 0.9640   | 1.5344   | 0.6706  | 0.140989 |
| Uqcc3         | chr19:8880015-8880933     | 22.1178  | 32.8862  | 0.5723  | 0.212309 |
| Gm13565       | chr2:62436879-62441142    | 0.3147   | 1.7773   | 2.4978  | 0.288731 |
| Ncoa2         | chr1:13139104-13374083    | 17.3631  | 15.1867  | -0.1932 | 0.143439 |
| Piwil2        | chr14:70372479-70429094   | 0.2290   | 0.5564   | 1.2809  | 0.054096 |

|               |                           |          |          |         |          |
|---------------|---------------------------|----------|----------|---------|----------|
| March9        | chr10:127055010-127060184 | 3.8732   | 2.6798   | -0.5314 | 0.017535 |
| Isoc2a        | chr7:4877052-4895717      | 8.4586   | 12.3502  | 0.5460  | 0.062164 |
| Traj12        | chr14:54206552-54206610   | 221.5473 | 151.1878 | -0.5513 | 0.100756 |
| 1700019D03Rik | chr1:52922323-52963260    | 1.7079   | 2.6313   | 0.6235  | 0.113213 |
| Zfp282        | chr6:47877203-47908485    | 4.8201   | 6.2282   | 0.3698  | 0.186667 |
| Tmem143       | chr7:45896940-45917413    | 1.7300   | 2.7249   | 0.6554  | 0.127415 |
| Gm26617       | chrX:94793102-94798237    | 2.3452   | 1.5210   | -0.6247 | 0.152085 |
| Hspa9         | chr18:34937413-34954357   | 86.8581  | 72.0326  | -0.2700 | 0.337858 |
| Ddx50         | chr10:62616022-62651218   | 31.3343  | 38.2317  | 0.2870  | 0.113344 |
| Klk8          | chr7:43797576-43803822    | 11.7691  | 17.5169  | 0.5737  | 0.198289 |
| Coa4          | chr7:100537099-100540369  | 9.5856   | 6.8531   | -0.4841 | 0.026043 |
| Cmb1          | chr15:31568790-31590119   | 3.2857   | 1.2940   | -1.3444 | 0.051921 |
| Gnl3          | chr14:31012433-31019089   | 66.4978  | 53.9031  | -0.3029 | 0.315103 |
| Phyhd1        | chr2:30266202-30301080    | 3.1247   | 4.6541   | 0.5748  | 0.146820 |
| Pde2a         | chr7:101421690-101512829  | 16.9510  | 21.9800  | 0.3748  | 0.236928 |
| Fam129c       | chr8:71597647-71607936    | 2.9333   | 1.9334   | -0.6014 | 0.089140 |
| Vmac          | chr17:56713931-56717699   | 6.0979   | 4.3162   | -0.4985 | 0.037420 |
| NA            | chr1:133619870-133661380  | 39.3660  | 33.8507  | -0.2178 | 0.172220 |
| Haus2         | chr2:120609382-120621560  | 6.5483   | 9.5330   | 0.5418  | 0.205875 |
| Gm9143        | chrX:103037623-103038368  | 2.3605   | 0.6672   | -1.8228 | 0.268327 |
| Gm15897       | chr16:11494820-11496306   | 0.8509   | 0.1691   | -2.3311 | 0.242942 |
| Gskip         | chr12:105685351-105703047 | 9.3011   | 11.8393  | 0.3481  | 0.024214 |
| 2610507I01Rik | chr11:59199835-59202385   | 6.2483   | 3.8576   | -0.6958 | 0.089964 |
| Kif5c         | chr2:49619297-49774778    | 3.5985   | 4.9023   | 0.4461  | 0.187491 |
| Podnl1        | chr8:84125988-84132527    | 20.8085  | 27.4865  | 0.4016  | 0.250464 |
| Arf1          | chr11:59211411-59228270   | 60.8181  | 75.4651  | 0.3113  | 0.228121 |
| Sulf2         | chr2:166073088-166155663  | 1.6065   | 0.8737   | -0.8788 | 0.321749 |
| Gm7099        | chr12:9429545-9430099     | 2.0374   | 0.3330   | -2.6129 | 0.207895 |
| Pxn           | chr5:115506675-115555987  | 8.6798   | 10.5571  | 0.2825  | 0.128613 |
| Ap1s1         | chr5:137034992-137046135  | 9.6822   | 12.9955  | 0.4246  | 0.109372 |
| Fkrp          | chr7:16809269-16816732    | 14.6071  | 11.4996  | -0.3451 | 0.139881 |
| Sympk         | chr7:19024376-19054618    | 22.3464  | 18.5636  | -0.2676 | 0.276244 |
| Mtcp1         | chrX:75410443-75416588    | 10.5804  | 8.7329   | -0.2769 | 0.043991 |
| Pfdn5         | chr15:102326115-102331873 | 90.7232  | 113.6007 | 0.3244  | 0.249737 |
| Gm10552       | chr1:85604084-85611896    | 1.2503   | 0.1858   | -2.7501 | 0.143712 |
| Raf1          | chr6:115618066-115676635  | 39.0009  | 45.5922  | 0.2253  | 0.122400 |
| Dusp18        | chr11:3895239-3901296     | 0.3083   | 0.0633   | -2.2841 | 0.032143 |
| Rhbdd3        | chr11:5098925-5106093     | 3.8245   | 2.4396   | -0.6486 | 0.129314 |
| Zrsr1         | chr11:22972004-22976496   | 11.0365  | 8.8883   | -0.3123 | 0.178737 |
| Kat2a         | chr11:100704745-100712465 | 16.9815  | 14.1617  | -0.2620 | 0.080352 |
| Gm11670       | chr11:108939309-108942015 | 2.7205   | 6.0599   | 1.1554  | 0.060555 |
| Tmed2         | chr5:124540694-124550506  | 8.7092   | 11.8569  | 0.4451  | 0.103561 |
| Fam221a       | chr6:49367738-49389905    | 0.3939   | 1.0924   | 1.4717  | 0.015882 |
| ltfg2         | chr6:128409443-128424931  | 4.2748   | 3.0710   | -0.4772 | 0.201636 |
| Slc1a5        | chr7:16781345-16798274    | 86.4607  | 75.3646  | -0.1982 | 0.225103 |
| Usp19         | chr9:108490675-108502333  | 39.0735  | 33.2173  | -0.2343 | 0.246305 |
| Diap2         | chrX:129749741-130465834  | 4.0235   | 3.0216   | -0.4131 | 0.272222 |
| Bora          | chr14:99046426-99074537   | 8.4414   | 11.0606  | 0.3899  | 0.057791 |
| Cebpz         | chr17:78919005-78937070   | 39.5683  | 33.5309  | -0.2389 | 0.221854 |
| Pi4ka         | chr16:17280350-17406314   | 20.0619  | 17.6226  | -0.1870 | 0.128766 |
| Gm10785       | chr16:91688910-91715642   | 4.8291   | 3.0799   | -0.6489 | 0.049168 |
| Ubac1         | chr2:25998542-26021747    | 16.3742  | 13.2272  | -0.3079 | 0.085792 |
| Gm13546       | chr2:58164000-58177063    | 5.5275   | 3.1793   | -0.7979 | 0.168098 |
| Pum1          | chr4:130663320-130781564  | 26.3967  | 23.1527  | -0.1892 | 0.070590 |
| Rnu11         | chr4:132270079-132270213  | 56.2849  | 96.8595  | 0.7831  | 0.414196 |
| Ncmap         | chr4:135369575-135398227  | 12.2022  | 17.4926  | 0.5196  | 0.263551 |
| Spsb2         | chr6:124808660-124810619  | 0.9780   | 2.5860   | 1.4028  | 0.093790 |
| Scrn2         | chr11:97029937-97033958   | 8.0325   | 5.4343   | -0.5638 | 0.149423 |
| Ftsj3         | chr11:106249141-106256079 | 52.0354  | 44.6786  | -0.2199 | 0.197749 |
| Cdc14b        | chr13:64192544-64274973   | 2.7536   | 3.6772   | 0.4173  | 0.041999 |
| Hexb          | chr13:97176331-97198357   | 36.0216  | 44.5974  | 0.3081  | 0.131929 |
| NA            | chr8:71674956-71676674    | 0.5648   | 1.3840   | 1.2930  | 0.076082 |
| Acin1         | chr14:54642160-54686931   | 43.0966  | 38.3272  | -0.1692 | 0.106993 |
| Gm18828       | chr1:36764862-36765874    | 7.9872   | 4.4376   | -0.8479 | 0.295718 |
| BC003331      | chr1:150361304-150393080  | 11.0648  | 14.2575  | 0.3657  | 0.169012 |
| Ufc1          | chr1:171288562-171295024  | 19.4193  | 26.2204  | 0.4332  | 0.188974 |
| Gm13622       | chr2:69737356-69737789    | 5.2093   | 1.8994   | -1.4556 | 0.220645 |
| Zc3hc1        | chr6:30366379-30391028    | 8.8193   | 6.6704   | -0.4029 | 0.306896 |
| ltga9         | chr9:118606689-118901003  | 1.6258   | 1.1557   | -0.4924 | 0.012010 |
| Rgs3          | chr4:62559846-62703018    | 14.6683  | 12.2761  | -0.2569 | 0.274311 |
| Rpa1          | chr11:75298165-75348324   | 42.7934  | 49.7216  | 0.2165  | 0.075148 |

|               |                           |          |          |         |          |
|---------------|---------------------------|----------|----------|---------|----------|
| Pcd1lg2       | chr19:29410918-29471157   | 14.1600  | 18.1544  | 0.3585  | 0.017831 |
| Marc2         | chr1:184813067-184846451  | 11.8913  | 14.3445  | 0.2706  | 0.082809 |
| Psm8          | chr7:29174187-29180701    | 94.6691  | 117.4308 | 0.3108  | 0.252743 |
| Dennd4a       | chr9:64811339-64919667    | 10.6870  | 13.3625  | 0.3223  | 0.207673 |
| Cpne5         | chr17:29156549-29237797   | 0.1127   | 0.2438   | 1.1131  | 0.021613 |
| Inpp5k        | chr11:75630987-75648871   | 17.0199  | 20.1316  | 0.2422  | 0.057092 |
| Ciart         | chr3:95878502-95882251    | 3.2605   | 1.8785   | -0.7956 | 0.168110 |
| Zfp451        | chr1:33760471-33814595    | 6.4605   | 5.5035   | -0.2313 | 0.161748 |
| Ppp1r15a      | chr7:45522915-45526268    | 6.8896   | 9.4825   | 0.4608  | 0.248750 |
| 4933407K13Rik | chrX:75706931-75764699    | 1.6972   | 1.1480   | -0.5640 | 0.064868 |
| Slu7          | chr11:43433743-43447981   | 29.3476  | 34.6990  | 0.2417  | 0.075676 |
| Supt4a        | chr11:87737551-87743623   | 44.7738  | 56.5609  | 0.3372  | 0.100044 |
| Stk17b        | chr1:53755505-53785224    | 208.1108 | 243.1999 | 0.2248  | 0.175363 |
| D930015E06Rik | chr3:83898286-84040161    | 30.2188  | 26.2376  | -0.2038 | 0.133443 |
| Psme2b        | chr11:48945353-48946190   | 29.8814  | 23.0851  | -0.3723 | 0.076907 |
| Slc35e4       | chr11:3907020-3914664     | 1.0371   | 1.9886   | 0.9392  | 0.063742 |
| C530050E15Rik | chr13:24631917-24638567   | 10.9705  | 8.2527   | -0.4107 | 0.289302 |
| Snrnp35       | chr5:124483133-124491124  | 3.0147   | 5.0495   | 0.7441  | 0.052219 |
| Neil3         | chr8:53586866-53639065    | 5.0156   | 3.6792   | -0.4470 | 0.155717 |
| Elof1         | chr9:22112988-22117148    | 26.7925  | 33.9729  | 0.3426  | 0.043637 |
| Snape4        | chr2:26362764-26380653    | 12.0098  | 9.7613   | -0.2991 | 0.273752 |
| Rps28         | chr17:33819026-33824562   | 38.9991  | 49.9061  | 0.3558  | 0.208076 |
| Tagln2        | chr1:172500046-172507380  | 43.5094  | 52.0022  | 0.2572  | 0.099711 |
| Gm9774        | chr3:92428065-92429423    | 0.4469   | 1.6936   | 1.9220  | 0.086063 |
| Mir5104       | chr10:7836380-7836474     | 28.5216  | 10.9077  | -1.3867 | 0.251793 |
| NA            | chr10:63024314-63058813   | 0.8069   | 0.3211   | -1.3294 | 0.009426 |
| Gm4799        | chr10:82954343-82955000   | 1.1969   | 3.3585   | 1.4885  | 0.064087 |
| Sycp3         | chr10:88459568-88473236   | 1.4833   | 0.3688   | -2.0078 | 0.147114 |
| Elk3          | chr10:93247413-93311135   | 26.6565  | 23.1924  | -0.2008 | 0.065154 |
| A730071L15Rik | chr11:6200028-6201643     | 5.8619   | 3.4968   | -0.7453 | 0.129815 |
| Kctd11        | chr11:69878264-69880985   | 2.0733   | 1.1317   | -0.8734 | 0.194584 |
| Camta2        | chr11:70669462-70688105   | 4.9615   | 3.5754   | -0.4727 | 0.279117 |
| Ssh2          | chr11:77216286-77460220   | 19.1157  | 17.1842  | -0.1537 | 0.033467 |
| Ccl4          | chr11:83662583-83664683   | 1.2167   | 3.3115   | 1.4445  | 0.186776 |
| Brip1         | chr11:86058137-86201193   | 3.8439   | 5.0952   | 0.4065  | 0.163117 |
| Trim25        | chr11:88999375-89020293   | 15.2569  | 12.9615  | -0.2352 | 0.132454 |
| Kpnb1         | chr11:97159713-97187881   | 79.9371  | 70.2158  | -0.1871 | 0.210216 |
| Timm9         | chr12:71123172-71136675   | 18.6498  | 13.0055  | -0.5200 | 0.212151 |
| Cdca4         | chr12:112820236-112829389 | 30.6490  | 36.5362  | 0.2535  | 0.069044 |
| Eef1e1        | chr13:38645697-38659028   | 33.3716  | 25.7079  | -0.3764 | 0.117055 |
| Nol7          | chr13:43398375-43402858   | 49.9209  | 60.0727  | 0.2671  | 0.112811 |
| Atraid        | chr5:31048311-31054633    | 10.1873  | 13.8550  | 0.4436  | 0.158866 |
| Lap3          | chr5:45493373-45512674    | 14.9467  | 11.6130  | -0.3641 | 0.240048 |
| Gatc          | chr5:115333241-115341178  | 12.1679  | 9.2023   | -0.4030 | 0.064166 |
| Rab35         | chr5:115631928-115647736  | 33.6997  | 39.4670  | 0.2279  | 0.013146 |
| Klhdc10       | chr6:30401867-30455179    | 6.4916   | 5.2080   | -0.3178 | 0.240445 |
| Gimap9        | chr6:48676128-48679114    | 114.7713 | 134.1270 | 0.2248  | 0.104549 |
| Gm26826       | chr6:122813625-122820614  | 4.3340   | 2.5841   | -0.7460 | 0.075768 |
| Atn1          | chr6:124739188-124756524  | 14.0199  | 17.5950  | 0.3277  | 0.237247 |
| Acrbp         | chr6:125049688-125063267  | 4.4852   | 3.2771   | -0.4527 | 0.017169 |
| Far2          | chr6:148047258-148182758  | 5.6846   | 7.5357   | 0.4067  | 0.205016 |
| Eps811        | chr7:4460673-4479404      | 12.3174  | 6.9981   | -0.8157 | 0.184709 |
| Ube2m         | chr7:13035119-13038275    | 33.5241  | 40.5516  | 0.2746  | 0.118593 |
| Exosc5        | chr7:25659152-25668031    | 23.8970  | 31.2330  | 0.3862  | 0.133198 |
| Trim34b       | chr7:104300229-104336909  | 4.2302   | 6.2871   | 0.5716  | 0.160029 |
| Tpp1          | chr7:105744846-105752207  | 10.1930  | 7.9280   | -0.3625 | 0.217707 |
| Gprc5b        | chr7:118972039-118995211  | 1.2907   | 0.5515   | -1.2267 | 0.089968 |
| D430042O09Rik | chr7:125707914-125874793  | 4.5186   | 5.8242   | 0.3662  | 0.118726 |
| Itgam         | chr7:128062639-128128160  | 1.9570   | 2.7853   | 0.5092  | 0.089426 |
| Gm7389        | chr8:3994627-3997505      | 2.4036   | 1.3714   | -0.8095 | 0.145439 |
| Cln3          | chr8:60910388-60983300    | 9.3194   | 8.1094   | -0.2006 | 0.142329 |
| 4931428F04Rik | chr8:105280409-105289528  | 0.8600   | 0.2814   | -1.6116 | 0.129647 |
| Gm17296       | chr8:126426651-126475065  | 8.8859   | 7.1021   | -0.3233 | 0.120084 |
| Panx1         | chr9:15005160-15045478    | 25.6279  | 30.8297  | 0.2666  | 0.119911 |
| Gm20603       | chr9:21028306-21032357    | 7.0854   | 9.0745   | 0.3570  | 0.044727 |
| Mthfs1        | chr9:88688604-88719798    | 4.9589   | 8.1779   | 0.7217  | 0.042705 |
| Slc9a9        | chr9:94669908-95230445    | 17.4131  | 15.0636  | -0.2091 | 0.064384 |
| Gm26767       | chr9:97068182-97073429    | 2.9819   | 2.1375   | -0.4803 | 0.019138 |
| Rab6b         | chr9:103112073-103185270  | 5.7265   | 7.6053   | 0.4094  | 0.164547 |
| Golph3        | chr15:12321495-12351265   | 74.7706  | 86.2508  | 0.2061  | 0.053510 |
| Ank           | chr15:27466676-27594909   | 7.3367   | 9.5433   | 0.3793  | 0.094314 |

|               |                           |          |          |         |          |
|---------------|---------------------------|----------|----------|---------|----------|
| Ddx23         | chr15:98645133-98662889   | 28.3829  | 25.2732  | -0.1674 | 0.003638 |
| Dph3          | chr14:32080565-32085692   | 6.9629   | 10.2513  | 0.5581  | 0.276992 |
| Ppp1r3e       | chr14:54872668-54877550   | 1.5205   | 0.7412   | -1.0366 | 0.098875 |
| Emc9          | chr14:55581515-55585302   | 30.3387  | 36.0648  | 0.2494  | 0.053166 |
| Chmp7         | chr14:69716978-69732570   | 23.4323  | 19.9658  | -0.2310 | 0.015987 |
| Tpm3-rs7      | chr14:113314607-113316713 | 3.9696   | 5.9318   | 0.5795  | 0.119715 |
| H2-T22        | chr17:36037127-36042747   | 35.8676  | 41.5615  | 0.2126  | 0.024545 |
| B3gnt5        | chr16:19760207-19772753   | 5.5979   | 7.0739   | 0.3376  | 0.046047 |
| Taf6l         | chr19:8774353-8786417     | 6.6761   | 5.2592   | -0.3442 | 0.143309 |
| Zbtb37        | chr1:161008793-161034849  | 14.1805  | 11.9945  | -0.2415 | 0.052642 |
| Mib1          | chr18:10725547-10818704   | 14.4089  | 12.6740  | -0.1851 | 0.035230 |
| Cxxc1         | chr18:74216130-74221491   | 38.3471  | 31.9153  | -0.2649 | 0.250403 |
| Brd3          | chr2:27445578-27507662    | 5.4957   | 4.3453   | -0.3388 | 0.134755 |
| Tfpi          | chr2:84432854-84476775    | 0.4920   | 0.8741   | 0.8292  | 0.026781 |
| Gm13807       | chr2:93403546-93417830    | 6.1535   | 9.4882   | 0.6247  | 0.106252 |
| Ckap2l        | chr2:129268209-129297212  | 5.9599   | 8.0773   | 0.4386  | 0.155112 |
| Plagl2        | chr2:153227758-153241426  | 9.5128   | 7.6856   | -0.3077 | 0.148023 |
| Ythdf1        | chr2:180904376-180920949  | 23.3332  | 19.5764  | -0.2533 | 0.157592 |
| Lime1         | chr2:181380077-181383628  | 84.5861  | 98.7278  | 0.2230  | 0.114263 |
| Mccc1         | chr3:35959311-36000678    | 1.7493   | 1.2873   | -0.4424 | 0.105613 |
| Hdgf          | chr3:87906320-87916132    | 66.0861  | 56.1011  | -0.2363 | 0.270889 |
| Gdap2         | chr3:100162380-100206981  | 7.0340   | 8.8782   | 0.3359  | 0.002337 |
| Gpsm2         | chr3:108678637-108722187  | 7.8945   | 9.8674   | 0.3218  | 0.014672 |
| Extl2         | chr3:116007461-116029016  | 1.8444   | 2.7587   | 0.5808  | 0.008669 |
| Usp45         | chr4:21767155-21837872    | 11.4606  | 13.8637  | 0.2746  | 0.101941 |
| Ufl1          | chr4:25248599-25281821    | 6.5508   | 8.4220   | 0.3625  | 0.123727 |
| Pnrc1         | chr4:33245422-33290163    | 95.8238  | 112.5550 | 0.2322  | 0.140095 |
| Hdac1         | chr4:129516103-129542713  | 9.2821   | 7.3199   | -0.3426 | 0.113145 |
| Wasf2         | chr4:133130504-133199756  | 17.4638  | 14.4614  | -0.2722 | 0.247548 |
| Gm22973       | chr12:59040334-59040525   | 6.6539   | 17.5294  | 1.3975  | 0.037255 |
| Hgfac         | chr5:35041552-35048436    | 1.3884   | 3.1214   | 1.1688  | 0.063893 |
| Gm24888       | chr7:109521279-109521409  | 3.1209   | 13.9626  | 2.1615  | 0.142070 |
| Gm23232       | chr9:114602087-114602192  | 16.4447  | 3.4727   | -2.2435 | 0.176886 |
| Traj5         | chr14:54213776-54213838   | 5.4512   | 21.5645  | 1.9840  | 0.083343 |
| Unc13b        | chr4:43058952-43264871    | 0.0862   | 0.2351   | 1.4475  | 0.172861 |
| Gm25541       | chr2:27539804-27539930    | 3.0177   | 11.2377  | 1.8968  | 0.106042 |
| Ttll10        | chr4:156034839-156059344  | 0.0527   | 0.2927   | 2.4726  | 0.063773 |
| Ttc28         | chr5:110879802-111289780  | 2.1600   | 1.5258   | -0.5014 | 0.339465 |
| Dtnb          | chr12:3572380-3781796     | 7.2212   | 8.6932   | 0.2677  | 0.062780 |
| Lsp1          | chr7:142460808-142494867  | 105.5259 | 120.9400 | 0.1967  | 0.117260 |
| Wdr44         | chrX:23693050-23806025    | 5.3069   | 4.0453   | -0.3916 | 0.318653 |
| Ttc23         | chr7:67647409-67726576    | 0.1327   | 0.3717   | 1.4861  | 0.131676 |
| Bin3          | chr14:70100144-70138191   | 26.4404  | 32.5440  | 0.2996  | 0.052717 |
| Ass1          | chr2:31470206-31520672    | 20.1410  | 25.3196  | 0.3301  | 0.146525 |
| Dzip1         | chr14:118875519-118925314 | 8.6905   | 6.9091   | -0.3309 | 0.130933 |
| Ttc19         | chr11:62281472-62328451   | 8.8940   | 6.7587   | -0.3961 | 0.324022 |
| Cenpa         | chr5:30666776-30674827    | 15.4726  | 19.5765  | 0.3394  | 0.166890 |
| Ece2          | chr16:20611592-20646485   | 2.0549   | 1.3395   | -0.6174 | 0.148972 |
| Klf8          | chrX:153237465-153396132  | 0.8688   | 1.4944   | 0.7824  | 0.118108 |
| Pitrm1        | chr13:6548156-6580139     | 39.1350  | 32.5169  | -0.2673 | 0.272638 |
| Ngfrap1       | chrX:136270252-136271978  | 22.6743  | 29.5680  | 0.3830  | 0.074681 |
| Adat1         | chr8:111966907-111992302  | 3.1766   | 2.0645   | -0.6217 | 0.280732 |
| Ccr8          | chr9:120092132-120094906  | 33.5408  | 44.0931  | 0.3946  | 0.211859 |
| 5730455P16Rik | chr11:80360491-80378034   | 4.9766   | 6.4731   | 0.3793  | 0.092489 |
| Rnf126        | chr10:79758514-79766952   | 19.8054  | 15.1297  | -0.3885 | 0.175605 |
| Sh3bp5l       | chr11:58330723-58347728   | 5.7063   | 4.5398   | -0.3299 | 0.103975 |
| Rnf187        | chr11:58932287-58938916   | 58.2242  | 70.1471  | 0.2688  | 0.188595 |
| Bcas3os1      | chr11:85702199-85719744   | 1.1396   | 0.6083   | -0.9057 | 0.017431 |
| Rsad1         | chr11:94539797-94549255   | 3.0746   | 2.0759   | -0.5667 | 0.201742 |
| Sumo2         | chr11:115523101-115536276 | 5.7242   | 3.8307   | -0.5795 | 0.063457 |
| Dld           | chr12:31331563-31351437   | 36.4747  | 30.3365  | -0.2658 | 0.181374 |
| Ercc6l2       | chr13:63815239-63900302   | 8.5068   | 10.6413  | 0.3230  | 0.170635 |
| Gm16120       | chr5:140207384-140210751  | 18.0615  | 12.4377  | -0.5382 | 0.215323 |
| Trbj1-4       | chr6:41534810-41534861    | 104.9478 | 177.8241 | 0.7608  | 0.128238 |
| B230319C09Rik | chr6:83441754-83448322    | 6.0076   | 4.0432   | -0.5713 | 0.152212 |
| Gm20650       | chr7:126891621-126897236  | 7.4130   | 16.3319  | 1.1396  | 0.119320 |
| Cnep1r1       | chr8:88118768-88135110    | 6.6828   | 9.6292   | 0.5270  | 0.197746 |
| Sucla2        | chr14:73525318-73596142   | 14.7378  | 18.7526  | 0.3476  | 0.198884 |
| Angptl4       | chr17:33773749-33781575   | 2.5008   | 1.4769   | -0.7598 | 0.086580 |
| Crybg3        | chr16:59490774-59555752   | 4.2658   | 5.4149   | 0.3441  | 0.067441 |
| Syvn1         | chr19:6046575-6053712     | 8.8061   | 6.7402   | -0.3857 | 0.298789 |

|               |                           |          |          |         |          |
|---------------|---------------------------|----------|----------|---------|----------|
| Ahnak         | chr19:8989283-9076919     | 107.8906 | 127.3186 | 0.2389  | 0.247292 |
| Tmem216       | chr19:10533864-10556238   | 8.1652   | 5.6698   | -0.5262 | 0.189048 |
| Malt1         | chr18:65430962-65478823   | 46.8208  | 55.9930  | 0.2581  | 0.242812 |
| Snrpb2        | chr2:143063038-143072853  | 16.4592  | 22.1973  | 0.4315  | 0.271600 |
| Trp53inp2     | chr3:155381058-155389850  | 0.4897   | 0.9614   | 0.9732  | 0.193814 |
| Ostc          | chr3:130695920-130709444  | 67.7991  | 83.9219  | 0.3078  | 0.176485 |
| Papss1        | chr3:131564767-131643670  | 14.1003  | 17.3554  | 0.2997  | 0.029740 |
| Tshz2         | chr2:169633012-170071816  | 0.3045   | 0.7831   | 1.3626  | 0.208268 |
| Fggy          | chr4:95557506-95926939    | 0.2258   | 0.6185   | 1.4539  | 0.081259 |
| Taco1os       | chr11:106065076-106066305 | 0.2654   | 1.5641   | 2.5593  | 0.166523 |
| Foxn3         | chr12:99194979-99450111   | 28.3698  | 23.8548  | -0.2501 | 0.248392 |
| Strn4         | chr7:16815888-16840931    | 15.1917  | 12.9540  | -0.2299 | 0.173101 |
| Zfp592        | chr7:80993680-81045164    | 17.9311  | 15.6007  | -0.2009 | 0.111800 |
| Brd7          | chr8:88331038-88362194    | 21.8390  | 18.9095  | -0.2078 | 0.110517 |
| Vwa5a         | chr9:38718267-38743337    | 14.3814  | 17.7013  | 0.2996  | 0.144636 |
| Trmt2b        | chrX:134222338-134276984  | 10.1910  | 12.7485  | 0.3230  | 0.170385 |
| Fopnl         | chr16:14299243-14317375   | 22.7306  | 28.5663  | 0.3297  | 0.075688 |
| Haus1         | chr18:77757566-77767780   | 13.8438  | 20.2809  | 0.5509  | 0.137375 |
| Foxj3         | chr4:119537003-119629119  | 8.1972   | 6.7965   | -0.2703 | 0.226503 |
| Stx12         | chr4:132853500-132884509  | 9.7604   | 12.3962  | 0.3449  | 0.102611 |
| Gm5422        | chr10:31248139-31251045   | 0.2857   | 0.8488   | 1.5711  | 0.063605 |
| Map1a         | chr2:121289599-121310832  | 0.0400   | 0.1419   | 1.8253  | 0.141644 |
| Mrpl5a        | chr10:81264712-81266934   | 37.4081  | 47.5266  | 0.3454  | 0.126575 |
| Ddx56         | chr11:6258918-6267772     | 32.6703  | 27.8748  | -0.2290 | 0.123546 |
| Plek          | chr11:16971205-17052381   | 5.3568   | 6.9373   | 0.3730  | 0.118971 |
| Cep68         | chr11:20227036-20249429   | 11.1401  | 9.4405   | -0.2388 | 0.047023 |
| Nudcd2        | chr11:40733666-40740046   | 19.0166  | 15.2294  | -0.3204 | 0.144872 |
| Gm12254       | chr11:58508790-58509261   | 4.9834   | 9.7413   | 0.9670  | 0.126746 |
| Phf23         | chr11:69995776-70000009   | 21.1694  | 25.6908  | 0.2793  | 0.138077 |
| Gm11201       | chr11:79023596-79031057   | 3.8411   | 7.1052   | 0.8874  | 0.099836 |
| Aoc2          | chr11:101325062-101329702 | 5.5036   | 3.7883   | -0.5388 | 0.154184 |
| Tmc8          | chr11:117782075-117793110 | 34.2107  | 27.9379  | -0.2922 | 0.284436 |
| Hgs           | chr11:120467634-120483984 | 20.2038  | 16.4972  | -0.2924 | 0.204040 |
| Rfng          | chr11:120780745-120784207 | 4.8986   | 3.2321   | -0.5999 | 0.267400 |
| Klf11         | chr12:24651370-24662774   | 3.0312   | 4.5250   | 0.5780  | 0.160821 |
| Ppp2r5e       | chr12:75450882-75596200   | 7.6953   | 5.9358   | -0.3745 | 0.265137 |
| Lman2         | chr13:55343832-55362783   | 41.1317  | 47.8465  | 0.2182  | 0.119852 |
| Cmya5         | chr13:93040712-93144724   | 2.1133   | 1.5636   | -0.4347 | 0.151244 |
| Smim14        | chr5:65446843-65537184    | 6.6911   | 8.3971   | 0.3277  | 0.135887 |
| Zfp664        | chr5:124862690-124902693  | 10.4242  | 8.3729   | -0.3161 | 0.236707 |
| Ufsp1         | chr5:137294668-137295664  | 4.7470   | 2.5340   | -0.9056 | 0.182502 |
| BC037034      | chr5:138259657-138264046  | 27.4973  | 22.6001  | -0.2830 | 0.276173 |
| Ahcy12        | chr6:29768010-29912310    | 18.6912  | 16.1999  | -0.2064 | 0.193393 |
| Cul1          | chr6:47453397-47526139    | 35.6925  | 43.1270  | 0.2730  | 0.173323 |
| Prokr1        | chr6:87578592-87590701    | 0.5730   | 0.1862   | -1.6218 | 0.097397 |
| Zfp422        | chr6:116624015-116628999  | 4.3235   | 6.2038   | 0.5210  | 0.197558 |
| Inafm1        | chr7:16272013-16273692    | 9.1658   | 6.1258   | -0.5814 | 0.199889 |
| Spcs2         | chr7:99837568-99858883    | 44.5084  | 51.8320  | 0.2198  | 0.048292 |
| Slc5a2        | chr7:128265656-128272430  | 3.9735   | 2.6283   | -0.5963 | 0.221627 |
| Rgs10         | chr7:128373620-128418758  | 84.2795  | 103.6262 | 0.2981  | 0.252555 |
| Trpm5         | chr7:143069152-143094642  | 0.5174   | 0.2338   | -1.1463 | 0.094738 |
| Gm26804       | chr8:20292476-20420781    | 2.4508   | 0.8874   | -1.4656 | 0.295381 |
| D8Ertd82e     | chr8:36094827-36147787    | 3.8344   | 2.7305   | -0.4898 | 0.377655 |
| Asah1         | chr8:41340196-41374773    | 11.5468  | 14.0871  | 0.2869  | 0.010301 |
| Gins3         | chr8:95633558-95645059    | 4.8625   | 6.9228   | 0.5097  | 0.103069 |
| Tcf12         | chr9:71844251-72111819    | 42.5109  | 37.9796  | -0.1626 | 0.029416 |
| Myo6          | chr9:80165030-80311729    | 3.9929   | 3.1046   | -0.3631 | 0.219108 |
| Ube2cbp       | chr9:86307233-86464950    | 2.1043   | 3.6457   | 0.7929  | 0.146677 |
| Vprbp         | chr9:106821873-106883318  | 24.7222  | 21.4912  | -0.2021 | 0.206380 |
| G6pdx         | chrX:74409482-74429194    | 13.4086  | 16.5711  | 0.3055  | 0.079114 |
| Tbl1x         | chrX:77511012-77662983    | 22.5035  | 19.6219  | -0.1977 | 0.143334 |
| Ebag9         | chr15:44619640-44641024   | 11.9891  | 15.5911  | 0.3790  | 0.023326 |
| Serhl         | chr15:83089505-83116674   | 5.1859   | 6.4964   | 0.3250  | 0.093913 |
| Prickle1      | chr15:93499113-93595891   | 2.8234   | 1.7379   | -0.7001 | 0.109449 |
| Arid2         | chr15:96287517-96404992   | 13.1417  | 11.3260  | -0.2145 | 0.187335 |
| Taf11         | chr17:27901121-27909242   | 10.6742  | 7.6019   | -0.4897 | 0.275324 |
| Cenpq         | chr17:40923050-40935047   | 10.5667  | 13.6650  | 0.3710  | 0.082917 |
| Ralbp1        | chr17:65848432-65885755   | 32.5103  | 37.3335  | 0.1996  | 0.008918 |
| Calm2         | chr17:87433411-87446935   | 79.5379  | 94.1779  | 0.2437  | 0.105588 |
| 2510002D24Rik | chr16:18836577-18840158   | 28.5343  | 23.1125  | -0.3040 | 0.121062 |
| Timmdc1       | chr16:38498346-38522663   | 11.4216  | 14.9123  | 0.3847  | 0.045234 |

|               |                           |          |          |         |          |
|---------------|---------------------------|----------|----------|---------|----------|
| Ubxn1         | chr19:8871558-8875663     | 96.1230  | 114.6725 | 0.2546  | 0.121957 |
| Casp7         | chr19:56397128-56442344   | 20.0396  | 24.6724  | 0.3000  | 0.097329 |
| Cacul1        | chr19:60524695-60581023   | 12.6736  | 15.1708  | 0.2595  | 0.076977 |
| Gm16152       | chr1:38384948-38393974    | 2.5271   | 1.0429   | -1.2769 | 0.252393 |
| Agfg1         | chr1:82839482-82896275    | 119.6083 | 137.4062 | 0.2001  | 0.092239 |
| Tomm40l       | chr1:171217801-171222514  | 7.9526   | 10.0994  | 0.3448  | 0.049580 |
| Capn2         | chr1:182467255-182517495  | 57.2614  | 66.2922  | 0.2113  | 0.093006 |
| Stom          | chr2:35313985-35336976    | 2.9610   | 4.3868   | 0.5671  | 0.076373 |
| Gm14085       | chr2:122484940-122528040  | 17.5143  | 14.6392  | -0.2587 | 0.233680 |
| Acss1         | chr2:150618104-150668500  | 12.0051  | 9.7929   | -0.2938 | 0.175842 |
| Supt20        | chr3:54693104-54716837    | 56.7209  | 48.7449  | -0.2186 | 0.149373 |
| Ssr2          | chr3:88579670-88588397    | 60.6566  | 71.9411  | 0.2462  | 0.027993 |
| Dram2         | chr3:106547692-106574845  | 14.9063  | 12.0692  | -0.3046 | 0.114870 |
| Cyb5rl        | chr4:107066987-107088268  | 1.2968   | 1.9035   | 0.5537  | 0.120471 |
| Sfn           | chr4:133600555-133602168  | 17.0482  | 12.6530  | -0.4301 | 0.214337 |
| 2610307P16Rik | chr13:28460033-28885620   | 0.6573   | 0.1787   | -1.8786 | 0.198877 |
| Gm26592       | chr9:21034289-21037782    | 0.7591   | 1.6762   | 1.1429  | 0.035056 |
| Gm14853       | chrX:105844464-105845013  | 2.0992   | 0.5229   | -2.0052 | 0.115638 |
| Gm12504       | chr4:44121892-44124123    | 0.2814   | 0.7728   | 1.4578  | 0.020587 |
| Atp4a         | chr7:30712208-30725535    | 0.4278   | 0.1027   | -2.0589 | 0.325241 |
| Mir3061       | chr11:52126745-52126836   | 1.8773   | 11.6460  | 2.6331  | 0.324671 |
| Pip5k1c       | chr10:81292962-81319973   | 18.0804  | 14.6558  | -0.3030 | 0.293643 |
| Pnpla8        | chr12:44221369-44312343   | 11.2450  | 14.0005  | 0.3162  | 0.156945 |
| Gm7964        | chr7:83755903-83757356    | 11.3771  | 8.0942   | -0.4912 | 0.186194 |
| Lpin2         | chr17:71182559-71249817   | 7.5441   | 8.8654   | 0.2328  | 0.053479 |
| Pdk1          | chr2:71873223-71903858    | 30.3378  | 25.9176  | -0.2272 | 0.290459 |
| Gm16008       | chr4:156022007-156031643  | 76.7090  | 93.4617  | 0.2850  | 0.208557 |
| Pick1         | chr15:79229172-79256674   | 3.1257   | 4.1918   | 0.4234  | 0.142296 |
| Sfrp2         | chr3:83766320-83774316    | 2.2626   | 1.1269   | -1.0056 | 0.245172 |
| Atp6v1c2      | chr12:17284720-17329359   | 0.4937   | 0.1059   | -2.2204 | 0.084317 |
| Ndufa2        | chr18:36742331-36744557   | 44.5634  | 62.6459  | 0.4914  | 0.248289 |
| Gm15427       | chr1:95498583-95499187    | 4.1989   | 8.6378   | 1.0407  | 0.190659 |
| 1700001O22Rik | chr2:30794768-30803661    | 0.1174   | 0.5013   | 2.0946  | 0.096717 |
| Lonrf3        | chrX:36328352-36362341    | 0.1282   | 0.4351   | 1.7627  | 0.134716 |
| Abracl        | chr10:18011262-18023252   | 118.3215 | 149.6084 | 0.3385  | 0.282166 |
| ErbB3         | chr10:128567522-128589652 | 4.6940   | 6.7783   | 0.5301  | 0.305705 |
| Sfln8         | chr11:83002157-83020810   | 44.5547  | 52.9981  | 0.2504  | 0.185063 |
| 4930470G03Rik | chr13:21440470-21445934   | 21.3786  | 26.9969  | 0.3366  | 0.199168 |
| Aff1          | chr5:103692373-103855322  | 10.6066  | 9.1325   | -0.2159 | 0.121349 |
| Rfc2          | chr5:134582689-134598328  | 39.7277  | 47.2321  | 0.2496  | 0.019636 |
| Ap2s1         | chr7:16738409-16749294    | 49.6108  | 62.9234  | 0.3429  | 0.213395 |
| Sirt2         | chr7:28766734-28788665    | 17.2007  | 14.0243  | -0.2945 | 0.209987 |
| Hnrnp1        | chr7:28808540-28822266    | 77.4643  | 68.7315  | -0.1726 | 0.197819 |
| 4931406P16Rik | chr7:34236706-34313551    | 12.1516  | 10.0532  | -0.2735 | 0.247379 |
| Gm1720        | chrX:166662024-166689812  | 1.8152   | 0.4737   | -1.9381 | 0.246263 |
| Gm17546       | chr15:95824458-95830072   | 2.7200   | 0.7896   | -1.7844 | 0.167268 |
| Irf9          | chr14:55603570-55610030   | 43.7634  | 51.9391  | 0.2471  | 0.193758 |
| Plekhm3       | chr1:64785982-64956824    | 2.0161   | 1.4850   | -0.4411 | 0.196137 |
| Dcaf17        | chr2:71055327-71099142    | 6.9602   | 5.8635   | -0.2474 | 0.090639 |
| Cnbd2         | chr2:156312298-156375638  | 2.8780   | 4.2700   | 0.5692  | 0.183760 |
| Cpt2          | chr4:107903980-107923610  | 3.7538   | 6.1748   | 0.7180  | 0.141157 |
| Gm15937       | chr15:5208912-5210147     | 0.2940   | 1.3147   | 2.1607  | 0.138304 |
| Gm11832       | chr4:11611138-11615007    | 0.6256   | 2.6575   | 2.0867  | 0.186151 |
| Esrp2         | chr8:106130318-106136974  | 2.1409   | 3.2124   | 0.5854  | 0.232134 |
| Gpr62         | chr9:106463972-106465940  | 0.0760   | 0.4984   | 2.7123  | 0.169423 |
| Wnk1          | chr6:119923968-120038672  | 29.0242  | 23.9807  | -0.2754 | 0.415308 |
| AA414768      | chrX:12936871-12938128    | 0.8907   | 2.3895   | 1.4236  | 0.035777 |
| Gm10250       | chr15:5120601-5121172     | 9.7955   | 5.5233   | -0.8266 | 0.121641 |
| Prkd3         | chr17:78949404-79020816   | 8.6871   | 7.1594   | -0.2790 | 0.259892 |
| Mrpl21        | chr19:3282900-3292837     | 14.1934  | 18.4666  | 0.3797  | 0.149233 |
| Cep350        | chr1:155844965-155972890  | 21.3240  | 18.6945  | -0.1899 | 0.194243 |
| Fam69b        | chr2:26628456-26636497    | 4.3906   | 3.0740   | -0.5143 | 0.041424 |
| Ccnb1         | chr13:100778649-100786570 | 1.6991   | 2.7111   | 0.6741  | 0.159936 |
| Alg13         | chrX:144317811-144374450  | 2.6807   | 1.8405   | -0.5425 | 0.250139 |
| Alg10b        | chr15:90224310-90230554   | 17.5875  | 14.5804  | -0.2705 | 0.204722 |
| Gm17111       | chr12:110664891-110665408 | 19.7442  | 12.5298  | -0.6561 | 0.130596 |
| Ifnar1        | chr16:91485237-91507441   | 54.8913  | 49.5195  | -0.1486 | 0.043226 |
| Arfgef2       | chr2:166805587-166898052  | 11.2455  | 9.3447   | -0.2671 | 0.279393 |
| Zdhhc18       | chr4:133605298-133650154  | 42.0786  | 35.1272  | -0.2605 | 0.326455 |
| Zkscan8       | chr13:21513221-21531120   | 11.3187  | 9.3281   | -0.2791 | 0.264846 |
| Crmp1         | chr5:37242079-37292132    | 2.1159   | 3.4236   | 0.6942  | 0.182370 |



|               |                           |          |          |         |          |
|---------------|---------------------------|----------|----------|---------|----------|
| Ccdc126       | chr6:49319273-49341582    | 5.5476   | 3.8569   | -0.5244 | 0.093192 |
| Reep1         | chr6:71707560-71810710    | 1.9178   | 1.1578   | -0.7281 | 0.171043 |
| Gm26811       | chr6:89304629-89327621    | 0.6913   | 0.3155   | -1.1317 | 0.179777 |
| Zfp82         | chr7:30054488-30072900    | 2.8468   | 2.1763   | -0.3875 | 0.008617 |
| Rpl39         | chrX:37082519-37085402    | 97.3342  | 125.3979 | 0.3655  | 0.319729 |
| Amer1         | chrX:95420317-95444872    | 6.8872   | 5.5227   | -0.3185 | 0.241444 |
| Rgcc          | chr14:79288755-79301645   | 15.1976  | 10.9089  | -0.4783 | 0.093355 |
| Rnaset2a      | chr17:8128609-8148097     | 1.5260   | 3.3832   | 1.1486  | 0.065381 |
| Psmb8         | chr17:34197720-34201454   | 127.0025 | 146.8236 | 0.2092  | 0.131199 |
| H2-M3         | chr17:37270219-37274484   | 36.9544  | 45.2927  | 0.2935  | 0.116758 |
| Usmg5         | chr19:47083470-47090625   | 1.6088   | 5.3988   | 1.7467  | 0.168383 |
| Adck2         | chr6:39573872-39596595    | 7.0124   | 9.4116   | 0.4245  | 0.168707 |
| Aasdhppt      | chr9:4294792-4309494      | 11.3319  | 8.9658   | -0.3379 | 0.158136 |
| Gm26850       | chr3:63963632-63968659    | 4.2094   | 6.0720   | 0.5286  | 0.171509 |
| Snord99       | chr4:132310690-132310764  | 43.2140  | 18.6641  | -1.2112 | 0.224053 |
| Gm5909        | chr8:80110805-80112086    | 0.1714   | 0.7906   | 2.2056  | 0.090434 |
| Pycr1         | chr11:120635711-120643769 | 0.0489   | 0.2537   | 2.3742  | 0.016202 |
| Spock2        | chr10:60106218-60135198   | 9.9615   | 13.7421  | 0.4642  | 0.408920 |
| Atp6v0d1      | chr8:10524464-105566047   | 20.6583  | 25.7636  | 0.3186  | 0.103730 |
| Gm23880       | chr15:81586132-81586186   | 23.6579  | 4.5601   | -2.3752 | 0.174915 |
| Wscd2         | chr5:113490332-113589725  | 0.3633   | 0.5779   | 0.6697  | 0.019021 |
| Ccdc57        | chr11:120826528-120932872 | 0.8869   | 0.4201   | -1.0782 | 0.087129 |
| Tyro3         | chr2:119797732-119818104  | 4.1408   | 2.8012   | -0.5639 | 0.402156 |
| 3110009E18Rik | chr1:120121186-120188189  | 2.9634   | 1.8159   | -0.7066 | 0.039212 |
| Rnf13         | chr3:57736065-57835233    | 14.4524  | 18.0138  | 0.3178  | 0.083509 |
| Mios          | chr6:8209221-8236274      | 10.0768  | 8.5662   | -0.2343 | 0.064024 |
| Hmgcl         | chr4:135946447-135962617  | 6.2633   | 8.6844   | 0.4715  | 0.134444 |
| AV099323      | chr2:132253356-132261333  | 2.6532   | 1.0240   | -1.3735 | 0.170939 |
| Pex12         | chr11:83294641-83302586   | 4.7900   | 3.5523   | -0.4313 | 0.130064 |
| Dhps          | chr8:85071756-85075162    | 19.8966  | 15.6033  | -0.3507 | 0.275269 |
| Gm26564       | chr10:34295911-34298907   | 6.0219   | 7.9828   | 0.4067  | 0.058176 |
| Adam1a        | chr5:121518575-121521695  | 2.8095   | 1.7445   | -0.6875 | 0.184402 |
| Akr1b3        | chr6:34303933-34317497    | 9.1303   | 7.4337   | -0.2966 | 0.083461 |
| Rprd2         | chr3:95759872-95818953    | 10.2061  | 8.3985   | -0.2812 | 0.285190 |
| Dennd2d       | chr3:106482404-106503030  | 65.6667  | 58.4199  | -0.1687 | 0.146244 |
| Gars          | chr6:55038000-55079504    | 74.2578  | 63.6154  | -0.2232 | 0.262831 |
| Ecd           | chr14:20319858-20348121   | 34.4172  | 30.2825  | -0.1846 | 0.013287 |
| 1700025G04Rik | chr1:151884523-152090320  | 2.2149   | 1.6389   | -0.4345 | 0.170246 |
| Gm9750        | chr19:9135156-9279175     | 0.0954   | 0.5158   | 2.4351  | 0.163778 |
| C730034F03Rik | chr15:89429588-89430868   | 7.6961   | 5.3423   | -0.5267 | 0.020176 |
| Zfp688        | chr7:127418966-127422068  | 6.8013   | 9.2129   | 0.4378  | 0.136865 |
| Grik5         | chr7:25009852-25072369    | 3.4562   | 5.1317   | 0.5702  | 0.269990 |
| Trpm6         | chr19:18749982-18892510   | 0.1665   | 0.4184   | 1.3290  | 0.068323 |
| Kidins220     | chr12:24974931-25059697   | 42.0460  | 37.0576  | -0.1822 | 0.208474 |
| Ccdc34        | chr2:110017816-110173360  | 1.3808   | 1.9850   | 0.5237  | 0.100120 |
| Gm996         | chr2:25575415-25580099    | 0.1770   | 0.4980   | 1.4927  | 0.036416 |
| Elk4          | chr1:132007606-132032612  | 39.7977  | 34.5398  | -0.2044 | 0.222547 |
| Cmah          | chr13:24327419-24477285   | 16.2012  | 13.9658  | -0.2142 | 0.215142 |
| Trp53         | chr11:69580358-69591873   | 14.9930  | 12.3573  | -0.2789 | 0.187630 |
| Gm14508       | chr5:116009315-116016105  | 1.7186   | 3.6423   | 1.0836  | 0.267186 |
| Med25         | chr7:44879390-44892397    | 16.2874  | 12.0040  | -0.4402 | 0.363103 |
| Mia3          | chr1:183326724-183369529  | 39.5102  | 35.3638  | -0.1600 | 0.078524 |
| Gm24636       | chr4:133171426-133171714  | 8.7497   | 2.5614   | -1.7723 | 0.341326 |
| Gm17711       | chr10:18011267-18011505   | 133.2002 | 178.5721 | 0.4229  | 0.244486 |
| Myb           | chr10:21124929-21160984   | 55.8987  | 44.3319  | -0.3345 | 0.392014 |
| Gm15200       | chr10:42698035-42698518   | 18.9174  | 27.9638  | 0.5638  | 0.094417 |
| Pwp2          | chr10:78170909-78185149   | 24.0958  | 19.5822  | -0.2992 | 0.310572 |
| Prorsd1       | chr11:29511756-29515033   | 5.9166   | 7.8612   | 0.4100  | 0.000223 |
| Med9          | chr11:59948205-59962205   | 4.3125   | 6.1696   | 0.5167  | 0.054158 |
| Pigw          | chr11:84876314-84880285   | 5.2006   | 3.4144   | -0.6070 | 0.210824 |
| Lrrc59        | chr11:94629766-94645216   | 32.3509  | 27.8541  | -0.2159 | 0.116994 |
| B130006D01Rik | chr11:95723586-95726710   | 2.4340   | 1.5329   | -0.6671 | 0.132943 |
| D030028A08Rik | chr11:96916269-96965060   | 5.2730   | 4.2651   | -0.3061 | 0.072243 |
| Prpsap1       | chr11:116470844-116494202 | 16.0049  | 13.2187  | -0.2759 | 0.191409 |
| Aspscr1       | chr11:120672972-120709447 | 13.4225  | 11.1554  | -0.2669 | 0.200376 |
| Atad2b        | chr12:4917403-5044047     | 20.3266  | 17.2455  | -0.2371 | 0.223894 |
| Ralgapa1      | chr12:55602928-55821167   | 23.3184  | 20.7511  | -0.1683 | 0.064103 |
| Arf6          | chr12:69372149-69375979   | 139.6344 | 158.3246 | 0.1812  | 0.088578 |
| Wdr25         | chr12:108894271-109028452 | 2.2419   | 1.4978   | -0.5819 | 0.159582 |
| Klc1          | chr12:111758848-111807844 | 20.5787  | 17.1289  | -0.2647 | 0.218936 |
| Crip1         | chr12:113152011-113153877 | 276.5344 | 335.7452 | 0.2799  | 0.259671 |

|               |                           |         |         |         |          |
|---------------|---------------------------|---------|---------|---------|----------|
| Sp4           | chr12:118234932-118301440 | 31.0121 | 27.7118 | -0.1623 | 0.022598 |
| Zfp493        | chr13:67779753-67792512   | 2.1760  | 1.4988  | -0.5379 | 0.040793 |
| Gm6421        | chr13:117358211-117358622 | 6.5395  | 12.4330 | 0.9269  | 0.217373 |
| 4833420G17Rik | chr13:119462758-119486117 | 54.8783 | 47.5094 | -0.2080 | 0.196659 |
| Slc35f6       | chr5:30647932-30659731    | 7.3584  | 9.2655  | 0.3325  | 0.026056 |
| Abcg3         | chr5:104935056-104982718  | 17.7122 | 14.1099 | -0.3280 | 0.256572 |
| Lamtor4       | chr5:138255607-138259398  | 27.4400 | 37.5422 | 0.4522  | 0.271994 |
| BC037034      | chr5:138259655-138264046  | 25.5807 | 21.2260 | -0.2692 | 0.284919 |
| 1110001J03Rik | chr6:38533501-38539449    | 4.3308  | 7.8977  | 0.8668  | 0.089627 |
| Tmem176b      | chr6:48833810-48841374    | 3.3514  | 1.9673  | -0.7686 | 0.177537 |
| Dctn1         | chr6:83165919-83200117    | 15.5340 | 13.2027 | -0.2346 | 0.235499 |
| Pcbp1         | chr6:86524498-86526171    | 25.8955 | 20.1362 | -0.3629 | 0.253507 |
| Gm22591       | chr6:113060697-113060803  | 14.8321 | 4.0361  | -1.8777 | 0.106152 |
| Tfpt          | chr7:3620323-3629929      | 20.9556 | 16.1083 | -0.3795 | 0.180328 |
| Meis3         | chr7:16175089-16186510    | 5.8014  | 7.6174  | 0.3929  | 0.036761 |
| Tomm40        | chr7:19701312-19715438    | 15.4861 | 13.0498 | -0.2469 | 0.147428 |
| 0610005C13Rik | chr7:45567794-45575327    | 0.6733  | 0.2217  | -1.6029 | 0.245033 |
| Tmem126a      | chr7:90450699-90457229    | 30.5845 | 39.4860 | 0.3685  | 0.177993 |
| Pik3c2a       | chr7:116337275-116443458  | 26.5374 | 30.8144 | 0.2156  | 0.110989 |
| Igsf6         | chr7:121064066-121074530  | 3.2249  | 1.6742  | -0.9457 | 0.335032 |
| McpH1         | chr8:18595130-18803189    | 5.2959  | 4.4153  | -0.2624 | 0.023581 |
| Nat2          | chr8:67494866-67502580    | 15.2159 | 20.2114 | 0.4096  | 0.179032 |
| Mmaa          | chr8:79266423-79294956    | 3.8536  | 2.6962  | -0.5153 | 0.076009 |
| Atxn1l        | chr8:109726450-109737739  | 13.5915 | 11.5005 | -0.2410 | 0.260675 |
| Tmem170       | chr8:111864897-111876675  | 4.5249  | 3.0325  | -0.5774 | 0.086463 |
| Mphosph6      | chr8:117791644-117801929  | 19.5538 | 25.2842 | 0.3708  | 0.063160 |
| Zfpm1         | chr8:122282140-122337251  | 25.8573 | 20.7663 | -0.3163 | 0.304977 |
| Spata2l       | chr8:123232254-123236209  | 4.4363  | 3.0508  | -0.5402 | 0.154921 |
| 1810008B01Rik | chr8:124305131-124306507  | 14.3204 | 9.8336  | -0.5423 | 0.150139 |
| Smarca4       | chr9:21616168-21704230    | 45.8513 | 39.6333 | -0.2103 | 0.296849 |
| Snord14d      | chr9:40803994-40804080    | 98.9349 | 67.0565 | -0.5611 | 0.016438 |
| Zbtb16        | chr9:48654310-48835945    | 0.8263  | 0.4161  | -0.9899 | 0.106931 |
| Pou2af1       | chr9:51213689-51240079    | 25.7742 | 19.4759 | -0.4042 | 0.366068 |
| Cln6          | chr9:62838784-62852006    | 7.5505  | 5.2085  | -0.5357 | 0.259234 |
| Khdc3         | chr9:73101835-73104443    | 3.0243  | 1.7712  | -0.7719 | 0.179116 |
| Hyal2         | chr9:107569116-107572776  | 3.0274  | 4.7121  | 0.6383  | 0.099676 |
| Rbm5          | chr9:107740370-107770996  | 34.1300 | 30.8378 | -0.1463 | 0.097778 |
| P4htm         | chr9:108578825-108597600  | 6.4316  | 4.2621  | -0.5936 | 0.196723 |
| Ccrl2         | chr9:111054834-111057270  | 5.1031  | 7.5790  | 0.5706  | 0.173699 |
| Lars2         | chr9:123366939-123462664  | 46.7746 | 19.2943 | -1.2775 | 0.117823 |
| Suv39h1       | chrX:8061170-8074760      | 9.6560  | 7.9685  | -0.2771 | 0.138653 |
| Slc9a7        | chrX:20105754-20291807    | 9.6250  | 11.6992 | 0.2815  | 0.012856 |
| Xlr3b         | chrX:73192206-73202930    | 1.0682  | 0.4279  | -1.3198 | 0.193055 |
| Ubl4          | chrX:74365717-74373218    | 11.8504 | 9.3422  | -0.3431 | 0.199488 |
| Pola1         | chrX:93304766-93632155    | 9.8481  | 12.1016 | 0.2973  | 0.219867 |
| Hdac8         | chrX:102284638-102505359  | 3.5003  | 4.8191  | 0.4613  | 0.199727 |
| Amacr         | chr15:10981755-10996624   | 1.1439  | 2.0639  | 0.8514  | 0.141162 |
| Micall1       | chr15:79108971-79136897   | 12.2458 | 10.4363 | -0.2307 | 0.157812 |
| Rnd1          | chr15:98663420-98677461   | 0.7319  | 0.3030  | -1.2725 | 0.157873 |
| Galnt6os      | chr15:100695779-100704896 | 18.2282 | 12.9650 | -0.4915 | 0.365579 |
| Spcs1         | chr14:30999825-31001672   | 27.5807 | 35.1307 | 0.3491  | 0.212279 |
| Ghitm         | chr14:37120443-37135322   | 49.9350 | 59.0308 | 0.2414  | 0.154599 |
| Traj20        | chr14:54199440-54199498   | 44.1221 | 17.4098 | -1.3416 | 0.050820 |
| Mipep         | chr14:60784565-60903610   | 10.1625 | 8.0693  | -0.3327 | 0.039479 |
| NA            | chr17:32403005-32404698   | 40.7893 | 34.3973 | -0.2459 | 0.165633 |
| Ttc27         | chr17:74717749-74863570   | 24.0869 | 19.9884 | -0.2691 | 0.207379 |
| Gm6548        | chr17:78850791-78851956   | 19.8092 | 25.8181 | 0.3822  | 0.122086 |
| Carhsp1       | chr16:8658586-8672153     | 9.6182  | 12.4405 | 0.3712  | 0.170237 |
| Hic2          | chr16:17233571-17263430   | 1.9772  | 1.3312  | -0.5708 | 0.221459 |
| Gm15746       | chr16:23197094-23198121   | 2.4348  | 1.0594  | -1.2005 | 0.168247 |
| Fam43a        | chr16:30599722-30602797   | 0.9419  | 1.7450  | 0.8896  | 0.131919 |
| Kalrn         | chr16:33974257-34573532   | 0.0786  | 0.0138  | -2.5136 | 0.119181 |
| Gm9581        | chr16:59558012-59600886   | 2.1637  | 3.8060  | 0.8148  | 0.299405 |
| Gm26626       | chr16:92612813-92620105   | 5.8162  | 3.2460  | -0.8414 | 0.111485 |
| C2cd2         | chr16:97855209-97922633   | 3.0251  | 4.2832  | 0.5017  | 0.279198 |
| B3gnt1        | chr19:5038825-5041134     | 3.9010  | 5.9776  | 0.6157  | 0.174070 |
| Adhfe1        | chr1:9547947-9577970      | 0.4710  | 0.1769  | -1.4130 | 0.004431 |
| 2810408I11Rik | chr1:64679870-64690659    | 2.1241  | 0.8814  | -1.2689 | 0.128970 |
| Nuf2          | chr1:169497933-169531464  | 7.7846  | 10.2649 | 0.3990  | 0.124002 |
| Slamf7        | chr1:171634924-171649007  | 10.1763 | 16.3270 | 0.6821  | 0.279282 |
| Cenpf         | chr1:189640598-189688086  | 6.5234  | 7.9637  | 0.2878  | 0.185544 |

|               |                           |         |          |         |          |
|---------------|---------------------------|---------|----------|---------|----------|
| Osbp1a        | chr18:12755313-12941841   | 0.4810  | 0.1677   | -1.5203 | 0.154510 |
| Camsap1       | chr2:25926837-25983282    | 6.9687  | 5.5542   | -0.3273 | 0.264504 |
| Angptl2       | chr2:33216068-33247717    | 18.8174 | 24.1544  | 0.3602  | 0.349889 |
| Dgkz          | chr2:91932823-91975864    | 92.1898 | 80.1250  | -0.2024 | 0.340968 |
| Phf21a        | chr2:92093116-92364666    | 9.8679  | 8.5370   | -0.2090 | 0.079371 |
| Mavs          | chr2:131234062-131248025  | 5.9270  | 8.6227   | 0.5408  | 0.196713 |
| Fam83d        | chr2:158768092-158786637  | 0.8245  | 1.7162   | 1.0577  | 0.183929 |
| Snx21         | chr2:164785822-164793816  | 4.4299  | 3.3343   | -0.4099 | 0.127491 |
| Rps21         | chr2:180257376-180258445  | 82.4018 | 110.3063 | 0.4208  | 0.337247 |
| Samd10        | chr2:181595217-181599212  | 9.5894  | 7.0493   | -0.4440 | 0.239697 |
| Gpr160        | chr3:30855949-30897192    | 1.2445  | 2.0672   | 0.7321  | 0.205666 |
| Gfm1          | chr3:67430095-67476529    | 16.8302 | 14.4446  | -0.2205 | 0.061392 |
| Isg20l2       | chr3:87930313-87940686    | 37.0788 | 32.1069  | -0.2077 | 0.154531 |
| Tars2         | chr3:95739975-95754977    | 21.7149 | 18.6482  | -0.2196 | 0.155992 |
| Gm11870       | chr4:16011004-16012326    | 6.5479  | 4.2276   | -0.6312 | 0.194257 |
| Mfn2          | chr4:147873598-147904704  | 10.9107 | 9.0212   | -0.2744 | 0.198310 |
| 2510039O18Rik | chr4:147940894-147947314  | 32.7084 | 38.7076  | 0.2430  | 0.116540 |
| Gm11793       | chr11:121106146-121107127 | 1.6567  | 0.4419   | -1.9066 | 0.312581 |
| Gm15996       | chr12:111730093-111731831 | 0.3644  | 1.6532   | 2.1817  | 0.050419 |
| Zfp85os       | chr13:67729261-67756838   | 0.2685  | 0.6121   | 1.1886  | 0.151747 |
| Eif5al3-ps    | chr5:90132228-90132675    | 0.5733  | 2.6590   | 2.2134  | 0.055420 |
| Al429214      | chr8:36993574-36995531    | 0.1310  | 0.6411   | 2.2906  | 0.158734 |
| Arcm3         | chr2:19199301-19310241    | 0.2793  | 0.9588   | 1.7796  | 0.059684 |
| Gm26702       | chr2:25575430-25580099    | 0.1814  | 0.5068   | 1.4826  | 0.037585 |
| ltga10        | chr3:96645583-96664519    | 0.1187  | 0.3345   | 1.4950  | 0.055451 |
| Snord65       | chr11:62604514-62604586   | 5.9418  | 19.9672  | 1.7486  | 0.067412 |
| Slc18a1       | chr8:69037710-69089235    | 0.0357  | 0.1870   | 2.3900  | 0.113135 |
| Ctsf          | chr19:4855128-4860912     | 0.1802  | 0.6871   | 1.9312  | 0.232089 |
| Gm13776       | chr2:91716158-91717419    | 0.2284  | 0.8922   | 1.9656  | 0.009798 |
| Cyp39a1       | chr17:43667424-43751431   | 0.0657  | 0.2961   | 2.1721  | 0.112416 |
| 2700089E24Rik | chr6:133105238-133107747  | 15.6097 | 20.2828  | 0.3778  | 0.297927 |
| Lrrc20        | chr10:61475832-61582226   | 3.4028  | 5.0447   | 0.5680  | 0.173862 |
| Msi2          | chr11:88339381-88718513   | 18.1484 | 21.0670  | 0.2151  | 0.134371 |
| B9d2          | chr7:25681157-25686558    | 8.1279  | 11.5804  | 0.5107  | 0.072323 |
| Zfp27         | chr7:29893332-29906572    | 4.5618  | 5.9600   | 0.3857  | 0.075114 |
| Tsg101        | chr7:46888948-46919969    | 6.9637  | 8.9130   | 0.3561  | 0.011010 |
| Epsti1        | chr14:77904238-78002656   | 68.4248 | 82.0706  | 0.2623  | 0.235615 |
| Scel          | chr14:103513340-103613346 | 0.8466  | 0.2971   | -1.5107 | 0.249570 |
| Bag6          | chr17:35135177-35147322   | 20.4894 | 17.4160  | -0.2345 | 0.250824 |
| Gata3         | chr2:9857077-9890034      | 11.8421 | 14.6106  | 0.3031  | 0.117478 |
| Clic3         | chr2:25456837-25458776    | 9.5661  | 6.2041   | -0.6247 | 0.185707 |
| Arhgef2       | chr3:88607453-88648052    | 19.2329 | 16.9243  | -0.1845 | 0.169292 |
| Clspn         | chr4:126556934-126593903  | 6.4167  | 8.0537   | 0.3278  | 0.228963 |
| Smarca5-ps    | chr4:145464203-145467420  | 1.2449  | 0.6694   | -0.8951 | 0.084975 |
| Traj48        | chr14:54169808-54169868   | 9.0691  | 27.5911  | 1.6052  | 0.011937 |
| Ddx51         | chr5:110653450-110660496  | 5.2619  | 4.1752   | -0.3337 | 0.099723 |
| Wipi2         | chr5:142629541-142670588  | 15.1823 | 13.1730  | -0.2048 | 0.167311 |
| Sipa1l2       | chr8:125418062-125492710  | 4.9677  | 4.0321   | -0.3011 | 0.078199 |
| Comtd1        | chr14:21845860-21848977   | 6.6448  | 4.8199   | -0.4632 | 0.124880 |
| Trak1         | chr9:121366957-121474916  | 10.5449 | 8.5498   | -0.3026 | 0.234724 |
| Ptp1b         | chr16:35022420-35109175   | 2.2095  | 1.4685   | -0.5894 | 0.047646 |
| Slc12a7       | chr13:73763696-73816743   | 18.6161 | 16.3300  | -0.1890 | 0.036907 |
| NA            | chr8:8689665-8690644      | 32.7180 | 23.5771  | -0.4727 | 0.031474 |
| Mthfs         | chr9:89199378-89240226    | 5.6733  | 7.9775   | 0.4917  | 0.280275 |
| Atp6v0e       | chr17:26676395-26699644   | 15.9525 | 19.4402  | 0.2853  | 0.107878 |
| Asah2         | chr19:31984653-32061469   | 2.9703  | 4.1029   | 0.4660  | 0.098833 |
| Zfyve27       | chr19:42163950-42194590   | 9.4652  | 7.8432   | -0.2712 | 0.291554 |
| Ptbp3         | chr4:59471867-59549364    | 85.1165 | 95.9445  | 0.1728  | 0.059850 |
| Nupr1l        | chr5:129908567-129910396  | 0.1869  | 0.7989   | 2.0958  | 0.145532 |
| Dnah9         | chr11:65831281-66168551   | 0.0121  | 0.0615   | 2.3400  | 0.048473 |
| Gm14270       | chr2:170285034-170285880  | 0.2273  | 1.2196   | 2.4240  | 0.184671 |
| Ddt           | chr10:75771229-75773414   | 14.9722 | 20.6745  | 0.4656  | 0.073394 |
| Patz1         | chr11:3288873-3309083     | 14.2040 | 12.0546  | -0.2367 | 0.184102 |
| Irgm1         | chr11:48861967-48871683   | 27.8779 | 33.8878  | 0.2816  | 0.261154 |
| Sar1b         | chr11:51763686-51791925   | 30.6129 | 38.9074  | 0.3459  | 0.217017 |
| Ispd          | chr12:36381518-36689444   | 0.3185  | 0.9010   | 1.5004  | 0.063631 |
| Lyst          | chr13:13590408-13777440   | 19.8990 | 17.6349  | -0.1743 | 0.149504 |
| Gm17259       | chr13:81778772-81783749   | 0.4627  | 0.8732   | 0.9164  | 0.041757 |
| Txx           | chr5:72695977-72752773    | 26.9392 | 22.4170  | -0.2651 | 0.242233 |
| Vps29         | chr5:122354368-122364984  | 11.8374 | 15.0493  | 0.3464  | 0.180139 |
| Baiap2l1      | chr5:144264525-144358112  | 1.4050  | 0.7148   | -0.9751 | 0.202610 |

|               |                           |         |         |         |          |
|---------------|---------------------------|---------|---------|---------|----------|
| Gpnmb         | chr6:49036517-49058182    | 0.4955  | 0.9523  | 0.9426  | 0.056233 |
| Tmcc1         | chr6:116018617-116193486  | 4.2004  | 5.2607  | 0.3247  | 0.072328 |
| lsg20         | chr7:78913423-78920362    | 8.7312  | 12.3529 | 0.5006  | 0.240245 |
| 1700067K01Rik | chr8:84001501-84004770    | 1.8591  | 0.9108  | -1.0294 | 0.179787 |
| Ttk           | chr9:83834688-83872390    | 4.6100  | 6.2613  | 0.4417  | 0.076178 |
| Phf20l1       | chr15:66577571-66645255   | 55.4540 | 48.9975 | -0.1786 | 0.210801 |
| Pdgfb         | chr15:79995899-80014808   | 0.8166  | 1.4937  | 0.8711  | 0.114238 |
| Ajuba         | chr14:54567468-54577661   | 0.1736  | 0.5197  | 1.5817  | 0.043739 |
| Zfand3        | chr17:30005086-30210019   | 17.1144 | 21.6563 | 0.3396  | 0.209957 |
| Pja2          | chr17:64281004-64331916   | 15.1609 | 12.6386 | -0.2625 | 0.159866 |
| Ccdc88b       | chr19:6844622-6858211     | 53.4600 | 47.3554 | -0.1749 | 0.199340 |
| Ric1          | chr19:29522281-29606829   | 12.3299 | 10.8126 | -0.1895 | 0.133284 |
| 1700034H15Rik | chr1:191890232-191907527  | 0.9161  | 0.4710  | -0.9597 | 0.212398 |
| Dolk          | chr2:30284228-30286354    | 8.5931  | 6.0997  | -0.4944 | 0.273049 |
| Gm13786       | chr2:92233104-92233437    | 11.8550 | 5.5225  | -1.1021 | 0.282125 |
| Ubr1          | chr2:120860268-120970715  | 16.7866 | 14.8340 | -0.1784 | 0.118028 |
| Phgdh         | chr3:98313169-98339990    | 8.3666  | 10.9660 | 0.3903  | 0.137194 |
| Dhcr24        | chr4:106561037-106589113  | 9.4237  | 7.5755  | -0.3150 | 0.152912 |
| Ehbp1         | chr11:22005827-22342292   | 0.2226  | 0.5744  | 1.3677  | 0.160930 |
| Gm20449       | chr7:41399377-41499417    | 0.0723  | 0.3242  | 2.1656  | 0.063202 |
| Fut8          | chr12:77238103-77476338   | 10.5870 | 13.6278 | 0.3643  | 0.251179 |
| Atg14         | chr14:47540893-47568434   | 3.1198  | 4.5342  | 0.5394  | 0.166487 |
| Mfap4         | chr11:61485430-61488900   | 1.3885  | 0.5181  | -1.4223 | 0.157198 |
| Pan2          | chr10:128303334-128321358 | 14.6829 | 12.5567 | -0.2257 | 0.090843 |
| Gm20521       | chr14:54883440-54898137   | 64.5346 | 55.4469 | -0.2190 | 0.125550 |
| Sdcbp2        | chr2:151572621-151590005  | 27.3057 | 34.0476 | 0.3184  | 0.120513 |
| Fbxw11        | chr11:32642723-32746816   | 21.4050 | 24.9630 | 0.2218  | 0.046880 |
| Gm10516       | chr1:192136897-192151013  | 0.7827  | 0.3374  | -1.2138 | 0.058506 |
| Gm25323       | chr4:126201174-126201277  | 10.4583 | 2.1315  | -2.2947 | 0.084055 |
| Rpl23a-ps2    | chr11:70879427-70879901   | 3.7097  | 0.8931  | -2.0544 | 0.273249 |
| Ppp2r3a       | chr9:101104991-101251832  | 3.3093  | 2.2730  | -0.5419 | 0.423251 |
| Fam20a        | chr11:109669748-109722279 | 1.8808  | 3.3821  | 0.8466  | 0.304310 |
| Sgtb          | chr13:104109740-104141735 | 0.9509  | 0.4417  | -1.1063 | 0.234569 |
| Gm17092       | chr5:99977685-99978858    | 3.2086  | 6.0303  | 0.9103  | 0.062189 |
| Gm17112       | chr5:137532422-137540718  | 5.2929  | 1.6492  | -1.6823 | 0.296103 |
| Pspn          | chr17:56999456-57000018   | 0.4055  | 2.1698  | 2.4196  | 0.229988 |
| Gm26581       | chr10:22212652-22217241   | 1.0971  | 0.5331  | -1.0412 | 0.346849 |
| Myeov2        | chr1:92637144-92641985    | 14.5954 | 20.5577 | 0.4942  | 0.264548 |
| Gm5812        | chr17:6121207-6122164     | 0.8842  | 2.2556  | 1.3511  | 0.030810 |
| Tmc4          | chr7:3665789-3677524      | 3.9475  | 2.9044  | -0.4427 | 0.072736 |
| Ptrhd1        | chr12:4234026-4240123     | 1.1379  | 1.8340  | 0.6887  | 0.129156 |
| Ticrr         | chr7:79660195-79698134    | 2.9731  | 2.1183  | -0.4891 | 0.239952 |
| Smg7          | chr1:152836995-152902646  | 31.6168 | 27.4633 | -0.2032 | 0.273377 |
| Camkk1        | chr11:73019007-73042073   | 3.8648  | 2.6990  | -0.5180 | 0.194221 |
| Xrcc2         | chr5:25689811-25705825    | 3.1521  | 2.2596  | -0.4803 | 0.258393 |
| Wdr19         | chr5:65199695-65260415    | 1.7716  | 2.8993  | 0.7107  | 0.140134 |
| Chek2         | chr5:110840016-110874133  | 5.1272  | 7.2575  | 0.5013  | 0.130649 |
| 4732471J01Rik | chr7:25384804-25385573    | 6.0539  | 10.8189 | 0.8376  | 0.092233 |
| BC048644      | chr8:121907832-121918428  | 0.5115  | 0.1943  | -1.3967 | 0.058052 |
| Gm3696        | chr14:7083207-7100621     | 0.7466  | 0.2405  | -1.6343 | 0.069231 |
| Ndufaf7       | chr17:78937134-78948052   | 6.4435  | 9.4243  | 0.5485  | 0.189144 |
| Chmp2b        | chr16:65539132-65562697   | 12.4489 | 16.9178 | 0.4425  | 0.213549 |
| Smad7         | chr18:75367528-75395935   | 18.2875 | 15.2318 | -0.2638 | 0.244866 |
| Mov10         | chr3:104794835-104818563  | 14.1405 | 11.6396 | -0.2808 | 0.240064 |
| Pink1         | chr4:138313408-138326307  | 27.9336 | 34.6655 | 0.3115  | 0.264162 |
| Zfp444        | chr7:6172225-6191349      | 4.7178  | 6.2109  | 0.3967  | 0.097152 |
| 1700027A07Rik | chr15:78911965-78913660   | 10.5487 | 5.5684  | -0.9217 | 0.242917 |
| Gm16570       | chr12:81589434-81589870   | 3.8895  | 0.7740  | -2.3291 | 0.202214 |
| Mir702        | chr5:136991432-136991541  | 1.7632  | 8.8682  | 2.3305  | 0.065242 |
| Gm16638       | chr7:83597047-83631842    | 1.7669  | 2.9530  | 0.7409  | 0.062352 |
| Gm14167       | chr2:151540730-151542348  | 1.6581  | 5.0772  | 1.6145  | 0.104383 |
| Emb           | chr13:117220624-117274098 | 70.6302 | 83.8742 | 0.2479  | 0.203862 |
| Zfp637        | chr6:117841179-117845956  | 5.8651  | 4.2472  | -0.4656 | 0.206203 |
| Gab2          | chr7:97081750-97308940    | 0.3587  | 0.1216  | -1.5609 | 0.133676 |
| Trav12-2      | chr14:53616314-53616912   | 5.6453  | 11.5148 | 1.0284  | 0.264015 |
| Gm26561       | chr17:70878077-71393284   | 6.1721  | 8.9693  | 0.5392  | 0.136725 |
| C130036L24Rik | chr1:86359573-86373791    | 2.2803  | 1.3567  | -0.7491 | 0.256153 |
| mt-Nd4        | chrM:10166-11544          | 42.4562 | 34.0625 | -0.3178 | 0.299188 |
| Gm12564       | chr3:37556182-37556503    | 3.7885  | 0.9455  | -2.0024 | 0.096424 |
| Tmem245       | chr4:56866922-56947437    | 4.6975  | 3.9318  | -0.2567 | 0.254044 |
| Smap2         | chr4:120968316-121017247  | 21.9635 | 18.2411 | -0.2679 | 0.245800 |

|               |                           |          |          |         |          |
|---------------|---------------------------|----------|----------|---------|----------|
| Txlna         | chr4:129626077-129641065  | 23.9020  | 20.5533  | -0.2178 | 0.244697 |
| Col16a1       | chr4:130047839-130099283  | 0.2225   | 0.5637   | 1.3409  | 0.181827 |
| Gm12167       | chr11:46342286-46345020   | 49.7399  | 39.8484  | -0.3199 | 0.123301 |
| Znhit3        | chr11:84910949-84916366   | 3.5047   | 5.1686   | 0.5605  | 0.102370 |
| Mlx           | chr11:101087276-101092207 | 26.5336  | 31.8998  | 0.2657  | 0.082350 |
| Pou5f2        | chr13:78022912-78026296   | 3.1475   | 1.9210   | -0.7123 | 0.330353 |
| Parp11        | chr6:127446839-127494241  | 16.3847  | 14.2074  | -0.2057 | 0.110096 |
| Pdhb          | chr14:8165990-8172992     | 26.0862  | 32.6382  | 0.3233  | 0.148460 |
| Traj26        | chr14:54194489-54194549   | 82.7818  | 48.3427  | -0.7760 | 0.092788 |
| Gbe1          | chr16:70313948-70569716   | 7.4553   | 5.9875   | -0.3163 | 0.193559 |
| Rnaseh2c      | chr19:5601872-5603439     | 25.2472  | 31.6415  | 0.3257  | 0.159635 |
| Fam111a       | chr19:12545739-12589768   | 40.0111  | 48.2037  | 0.2687  | 0.252377 |
| Map3k19       | chr1:127815270-127840290  | 0.6251   | 0.2250   | -1.4744 | 0.067529 |
| Dstyk         | chr1:132417452-132466959  | 6.1851   | 4.8769   | -0.3428 | 0.293493 |
| Hsd17b7       | chr1:169949534-169969241  | 4.5468   | 3.5869   | -0.3421 | 0.056646 |
| Vangl2        | chr1:172000959-172028444  | 0.8341   | 0.4417   | -0.9172 | 0.273849 |
| Bsd1          | chr4:129461580-129488498  | 9.8444   | 11.8286  | 0.2649  | 0.101136 |
| Slc2a12       | chr10:22645010-22704285   | 1.3102   | 2.3201   | 0.8244  | 0.167790 |
| Grin3b        | chr10:79970714-79977190   | 2.4401   | 1.6028   | -0.6063 | 0.098640 |
| Pes1          | chr11:3963974-3980004     | 28.1573  | 23.2813  | -0.2743 | 0.306142 |
| St6galnac2    | chr11:116675302-116694868 | 1.1906   | 0.7926   | -0.5871 | 0.068915 |
| Zfp511        | chr7:140036390-140040605  | 30.5793  | 24.5693  | -0.3157 | 0.125241 |
| Bace1         | chr9:45838579-45864399    | 5.7990   | 4.3945   | -0.4001 | 0.297860 |
| Arpp21        | chr9:112065090-112235938  | 0.1491   | 0.0632   | -1.2384 | 0.265101 |
| Abcd1         | chrX:73716596-73738534    | 11.3665  | 9.2886   | -0.2913 | 0.195178 |
| Dhrs1         | chr14:55739019-55745690   | 9.0734   | 11.3204  | 0.3192  | 0.034621 |
| H2-D1         | chr17:35262729-35267499   | 707.2581 | 802.4638 | 0.1822  | 0.185138 |
| Senp2         | chr16:22009483-22049269   | 20.8122  | 18.0590  | -0.2047 | 0.133188 |
| Lipt1         | chr1:37871737-37877387    | 4.1879   | 3.0539   | -0.4556 | 0.070480 |
| Ccb1          | chr2:30185123-30205847    | 5.1968   | 3.8723   | -0.4244 | 0.074499 |
| Spen          | chr4:141467889-141538597  | 5.9738   | 4.6737   | -0.3541 | 0.409968 |
| Gm14027       | chr2:129016951-129021756  | 3.8306   | 8.9501   | 1.2243  | 0.159055 |
| Traj34        | chr14:54184698-54184756   | 25.0861  | 62.8133  | 1.3242  | 0.065540 |
| 1700048O20Rik | chr9:121938134-121947014  | 0.2167   | 0.7490   | 1.7893  | 0.047876 |
| Ranbp17       | chr11:33211794-33513746   | 0.1256   | 0.0241   | -2.3825 | 0.302146 |
| 1110065P20Rik | chr4:124849484-124850730  | 3.4116   | 6.4770   | 0.9249  | 0.205340 |
| A830010M20Rik | chr5:107497377-107580596  | 3.3062   | 4.1074   | 0.3131  | 0.070317 |
| Gm25745       | chr10:86705315-86705448   | 28.1641  | 14.6056  | -0.9473 | 0.177545 |
| Tnrc6c        | chr11:117654288-117763439 | 15.8079  | 13.7295  | -0.2034 | 0.271219 |
| Tuba3a        | chr6:125278273-125286042  | 3.6395   | 2.0954   | -0.7965 | 0.243119 |
| Cxcr3         | chrX:101731534-101734269  | 62.5675  | 92.6642  | 0.5666  | 0.213110 |
| Ywhab         | chr2:163994959-164018588  | 42.4768  | 37.1628  | -0.1928 | 0.152235 |
| Plekhn1       | chr4:156221455-156228542  | 6.7325   | 4.5896   | -0.5528 | 0.322712 |
| Stac3         | chr10:127501685-127508823 | 0.9417   | 0.2938   | -1.6803 | 0.338525 |
| Zfp473        | chr7:44731480-44751050    | 0.2040   | 0.3676   | 0.8494  | 0.011000 |
| 2310002F09Rik | chr7:43695208-43797945    | 0.3390   | 1.1251   | 1.7308  | 0.338261 |
| Ctage5        | chr12:59129719-59191583   | 15.7699  | 13.7129  | -0.2016 | 0.220620 |
| Rpl5          | chr5:107900501-107909005  | 17.8886  | 15.1426  | -0.2404 | 0.179376 |
| Itpril2       | chr7:118485113-118491975  | 1.9773   | 2.9496   | 0.5770  | 0.269491 |
| Prps1         | chrX:140456612-140476140  | 21.0784  | 17.2528  | -0.2889 | 0.159252 |
| Arid1b        | chr17:4994331-5347656     | 11.3662  | 9.6676   | -0.2335 | 0.279317 |
| Gm8251        | chr1:44055951-44061936    | 0.1515   | 0.4242   | 1.4856  | 0.191382 |
| 4930558J18Rik | chr1:57359221-57377504    | 0.6851   | 1.6660   | 1.2819  | 0.039213 |
| 0610009O20Rik | chr18:38250248-38262629   | 20.1014  | 16.8944  | -0.2508 | 0.080681 |
| Psmc3         | chr2:91054008-91066369    | 60.3278  | 73.5653  | 0.2862  | 0.251144 |
| Gm23686       | chr3:18177461-18177625    | 22.3362  | 37.5297  | 0.7486  | 0.229258 |
| Dcaf10        | chr4:45342100-45379759    | 7.7309   | 6.5195   | -0.2459 | 0.128847 |
| Mier1         | chr4:103114389-103165754  | 18.7894  | 16.5940  | -0.1793 | 0.208006 |
| Lrrd1         | chr5:3845172-3866596      | 0.1371   | 0.4490   | 1.7116  | 0.033139 |
| Ifngr2        | chr16:91547071-91565169   | 10.2365  | 8.0248   | -0.3512 | 0.181786 |
| Pcgf6         | chr19:47033618-47050845   | 17.2276  | 14.1833  | -0.2805 | 0.076716 |
| Mbd3          | chr10:80392538-80399550   | 21.4059  | 17.2442  | -0.3119 | 0.221450 |
| Det1          | chr7:78822961-78847236    | 6.9626   | 9.1497   | 0.3941  | 0.127628 |
| NA            | chr5:105215698-105239533  | 6.9425   | 9.2900   | 0.4202  | 0.219899 |
| Usp31         | chr7:121642020-121707253  | 6.7645   | 5.8301   | -0.2144 | 0.076267 |
| Nmt2          | chr2:3284211-3328877      | 11.6193  | 9.9646   | -0.2216 | 0.133214 |
| Ctsa          | chr2:164832872-164841032  | 31.7230  | 37.8642  | 0.2553  | 0.240329 |
| Pmvk          | chr3:89459117-89469013    | 12.8698  | 17.3322  | 0.4295  | 0.145333 |
| NA            | chr10:59221952-59226431   | 0.6077   | 1.2326   | 1.0204  | 0.114191 |
| Sowahc        | chr10:59221952-59226434   | 0.6070   | 1.2313   | 1.0204  | 0.114191 |
| Gm17661       | chr2:90917642-90917914    | 2.2309   | 6.5865   | 1.5619  | 0.058814 |

|                |                           |         |         |         |          |
|----------------|---------------------------|---------|---------|---------|----------|
| Zwint          | chr10:72654844-72674964   | 15.2602 | 18.3663 | 0.2673  | 0.130306 |
| Dedd           | chr1:171329144-171342331  | 8.3436  | 6.9402  | -0.2657 | 0.177141 |
| N4bp3          | chr11:51643062-51650842   | 2.9684  | 4.1917  | 0.4978  | 0.070534 |
| Ubb            | chr11:62551170-62553213   | 76.7097 | 89.9722 | 0.2301  | 0.191871 |
| Bcas3          | chr11:85353166-85826058   | 8.7850  | 6.9875  | -0.3303 | 0.304367 |
| Mterf1a        | chr5:3890580-3893933      | 3.6238  | 5.3069  | 0.5503  | 0.140028 |
| D930016D06Rik  | chr5:104525734-104554211  | 3.3789  | 2.5550  | -0.4032 | 0.038535 |
| Tmem175        | chr5:108629769-108647770  | 9.8924  | 12.1363 | 0.2949  | 0.114036 |
| Oas1b          | chr5:120812634-120824163  | 13.2341 | 16.9682 | 0.3586  | 0.141565 |
| Gm23458        | chr5:123360831-123361000  | 6.2716  | 1.9412  | -1.6919 | 0.037945 |
| Fam3c          | chr6:22306519-22356243    | 34.6636 | 41.0864 | 0.2452  | 0.203038 |
| 9130019P16Rik  | chr6:54269680-54430221    | 0.1796  | 0.4631  | 1.3662  | 0.027033 |
| 2610044O15Rik8 | chr8:129217723-129221950  | 18.9619 | 11.3450 | -0.7410 | 0.090234 |
| Etfa           | chr9:55454507-55512243    | 10.3979 | 13.7467 | 0.4028  | 0.131860 |
| Rpgr           | chrX:10073620-10216920    | 0.7123  | 1.1327  | 0.6692  | 0.164115 |
| Arhgap4        | chrX:73891441-73921870    | 71.3040 | 63.9056 | -0.1580 | 0.231399 |
| Rrp7a          | chr15:83113432-83122801   | 14.6719 | 12.5132 | -0.2296 | 0.201368 |
| 1810013L24Rik  | chr16:8830099-8858916     | 25.5711 | 21.9620 | -0.2195 | 0.235794 |
| Tmem134        | chr19:4125933-4132307     | 21.2325 | 24.9000 | 0.2299  | 0.126762 |
| Tmem206        | chr1:191325911-191350914  | 9.4182  | 7.1513  | -0.3972 | 0.176771 |
| Gm26910        | chr18:67773711-67774857   | 8.5665  | 5.2568  | -0.7045 | 0.159705 |
| Tank           | chr2:61578584-61654171    | 35.3150 | 40.9830 | 0.2147  | 0.153550 |
| Trp53rk        | chr2:166792530-166799505  | 2.1233  | 1.4981  | -0.5032 | 0.186825 |
| Ubqln4         | chr3:88553715-88569725    | 21.9907 | 17.9702 | -0.2913 | 0.297546 |
| Amigo1         | chr3:108186334-108192286  | 1.3909  | 0.9553  | -0.5420 | 0.002709 |
| Abcd3          | chr3:121758908-121815302  | 6.2849  | 4.7556  | -0.4023 | 0.188836 |
| 5730508B09Rik  | chr3:127869687-127896323  | 4.9886  | 7.7500  | 0.6356  | 0.118032 |
| Lmtk3          | chr7:45783737-45804144    | 0.2264  | 0.4583  | 1.0174  | 0.012864 |
| Gm3667         | chr14:6868501-6889962     | 0.8641  | 0.2834  | -1.6082 | 0.294678 |
| C430042M11Rik  | chr17:83851674-83854393   | 0.2114  | 0.8777  | 2.0539  | 0.090128 |
| Ttc33          | chr15:5185524-5218336     | 14.3467 | 19.0465 | 0.4088  | 0.260756 |
| Pik3r1         | chr13:101680760-101768217 | 45.4869 | 40.6434 | -0.1624 | 0.164469 |
| Zfp939         | chr7:39449517-39474335    | 1.4375  | 0.6472  | -1.1513 | 0.058782 |
| Phf8           | chrX:151520671-151633859  | 10.7428 | 9.3847  | -0.1950 | 0.073580 |
| Zfp53          | chr17:21491255-21509764   | 33.3154 | 40.3749 | 0.2773  | 0.169244 |
| Snap29         | chr16:17406002-17430826   | 15.1595 | 12.1137 | -0.3236 | 0.353014 |
| Mvb12b         | chr2:33729952-33887946    | 4.6503  | 3.5198  | -0.4019 | 0.167399 |
| Sdc3           | chr4:130792536-130826319  | 1.2990  | 0.7960  | -0.7066 | 0.151884 |
| Tsc2           | chr17:24595936-24632629   | 11.3722 | 9.8836  | -0.2024 | 0.027197 |
| 1110059G10Rik  | chr9:122945088-122951000  | 3.7351  | 5.1878  | 0.4740  | 0.124641 |
| 4930513N10Rik  | chr8:95806829-95821728    | 1.6837  | 1.0516  | -0.6791 | 0.099719 |
| Gm4841         | chr18:60268300-60273267   | 7.6265  | 10.9680 | 0.5242  | 0.270972 |
| ltgb3          | chr11:104607999-104670476 | 17.5118 | 15.2702 | -0.1976 | 0.109822 |
| Khdrbs1        | chr4:129703163-129742303  | 33.8381 | 30.2762 | -0.1605 | 0.114470 |
| Ing1           | chr8:11556065-11563250    | 21.0667 | 17.7352 | -0.2484 | 0.168478 |
| Gm12195        | chr11:50134081-50135004   | 6.8863  | 3.2535  | -1.0817 | 0.264258 |
| Arid4a         | chr12:71015989-71098592   | 40.9622 | 35.7804 | -0.1951 | 0.300248 |
| Tmtc4          | chr14:122918970-122984035 | 4.9339  | 3.9658  | -0.3151 | 0.212408 |
| Ilf3           | chr9:21368018-21405361    | 34.0071 | 30.4432 | -0.1597 | 0.063187 |
| 9230116N13Rik  | chr1:136411915-136415519  | 1.1337  | 2.0475  | 0.8528  | 0.043975 |
| Gm13563        | chr2:26381525-26389018    | 36.2094 | 30.6595 | -0.2400 | 0.167645 |
| Zscan10        | chr17:23600855-23611019   | 0.0599  | 0.3113  | 2.3772  | 0.075605 |
| Glt8d2         | chr10:82650432-82690650   | 0.8818  | 0.5525  | -0.6745 | 0.003896 |
| Rhddf2         | chr11:116598164-116627019 | 2.9899  | 2.1912  | -0.4484 | 0.180755 |
| Klhdc2         | chr12:69296680-69310687   | 10.4111 | 12.2988 | 0.2404  | 0.025351 |
| Ercc8          | chr13:108158730-108195364 | 3.8003  | 2.9640  | -0.3586 | 0.207369 |
| Naga           | chr15:82329531-82338826   | 18.1348 | 22.1819 | 0.2906  | 0.073503 |
| Wdr12          | chr1:60076867-60098645    | 9.7079  | 7.8104  | -0.3138 | 0.266076 |
| Ptpn14         | chr1:189728267-189876695  | 0.3454  | 0.1665  | -1.0525 | 0.163362 |
| Ppm1j          | chr3:104781055-104786018  | 17.5172 | 13.8141 | -0.3426 | 0.243074 |
| Hemgn          | chr4:46393988-46413506    | 0.4739  | 0.1354  | -1.8070 | 0.025913 |
| Nudc           | chr4:133532541-133545996  | 48.5830 | 39.4598 | -0.3001 | 0.316761 |
| Exosc10        | chr4:148558428-148582401  | 41.4623 | 37.2763 | -0.1535 | 0.011401 |
| Gm6158         | chr14:24070073-24070637   | 0.4544  | 1.9914  | 2.1317  | 0.034054 |
| NA             | chr1:178256102-178257295  | 1.2012  | 0.2131  | -2.4949 | 0.158155 |
| Zfp458         | chr13:67254917-67269068   | 1.6716  | 2.5375  | 0.6021  | 0.125260 |
| Smdt1          | chr15:82338958-82349091   | 31.8982 | 40.7170 | 0.3522  | 0.200660 |
| Cnot2          | chr10:116485160-116581511 | 44.1828 | 51.2962 | 0.2154  | 0.152330 |
| Lrrk2          | chr15:91673174-91816120   | 0.5389  | 0.8219  | 0.6090  | 0.214480 |
| Gm9821         | chr2:91945702-91947655    | 21.8531 | 17.3977 | -0.3289 | 0.261614 |
| Nasp           | chr4:116601051-116627941  | 16.2858 | 13.5407 | -0.2663 | 0.336196 |

|               |                           |          |          |         |          |
|---------------|---------------------------|----------|----------|---------|----------|
| Gm26779       | chr5:109886230-109891137  | 4.8778   | 11.1833  | 1.1971  | 0.192384 |
| Raver1        | chr9:21074167-21091988    | 21.4504  | 17.3420  | -0.3067 | 0.317529 |
| Eif5a2        | chr3:28781310-28798846    | 8.7934   | 6.9987   | -0.3293 | 0.307608 |
| Ube2o         | chr11:116537739-116581447 | 6.1368   | 4.9274   | -0.3167 | 0.128186 |
| Al662270      | chr11:83223575-83226604   | 91.2014  | 109.8864 | 0.2689  | 0.253777 |
| Gm11723       | chr11:117783325-117785055 | 21.0863  | 14.7350  | -0.5171 | 0.074811 |
| Gm1972        | chr10:22224279-22253819   | 1.9986   | 0.5447   | -1.8755 | 0.167402 |
| Polrmt        | chr10:79736122-79746581   | 7.9208   | 6.4182   | -0.3035 | 0.193178 |
| Gm6283        | chr10:127313148-127314148 | 2.1212   | 0.7129   | -1.5730 | 0.096434 |
| 2810408A11Rik | chr11:69897351-69900987   | 1.2066   | 2.1455   | 0.8304  | 0.109238 |
| Gm12352       | chr11:98438036-98439046   | 21.9754  | 16.5183  | -0.4118 | 0.109481 |
| Mis18bp1      | chr12:65132733-65172604   | 3.4435   | 4.3472   | 0.3362  | 0.104657 |
| Bcl11b        | chr12:107910402-108003602 | 58.4099  | 53.0093  | -0.1400 | 0.136479 |
| Napepld       | chr5:21662900-21701396    | 2.2779   | 1.4825   | -0.6197 | 0.196938 |
| Golga3        | chr5:110176700-110226470  | 10.8222  | 9.6967   | -0.1584 | 0.023040 |
| Ep400         | chr5:110664372-110770717  | 16.5954  | 14.1544  | -0.2295 | 0.386041 |
| Gm13842       | chr5:116026410-116029230  | 1.7927   | 4.1094   | 1.1967  | 0.070131 |
| Snd1          | chr6:28475138-28935162    | 27.2492  | 24.3249  | -0.1638 | 0.193639 |
| Trbj2-6       | chr6:41543597-41543645    | 155.5703 | 94.7287  | -0.7157 | 0.228190 |
| Gimap7        | chr6:48718620-48724636    | 151.9561 | 180.2029 | 0.2460  | 0.259071 |
| Tpi1          | chr6:124810585-124814296  | 51.8190  | 62.9626  | 0.2810  | 0.355841 |
| Zfp667        | chr7:6286578-6307883      | 0.9615   | 1.5333   | 0.6733  | 0.098472 |
| Ccdc9         | chr7:16274041-16286795    | 11.5442  | 9.7896   | -0.2378 | 0.163403 |
| Sdhaf1        | chr7:30321410-30322375    | 44.6744  | 54.1321  | 0.2770  | 0.107540 |
| Nkg7          | chr7:43437072-43438246    | 29.7893  | 39.7281  | 0.4154  | 0.267663 |
| Smim19        | chr8:22462614-22476879    | 7.9781   | 10.7409  | 0.4290  | 0.051416 |
| Cep44         | chr8:56531521-56551047    | 9.2968   | 7.0622   | -0.3966 | 0.235971 |
| Zfp709        | chr8:71887263-71890912    | 6.0894   | 9.1807   | 0.5923  | 0.250244 |
| Ddx28         | chr8:106009615-106011486  | 12.2289  | 15.9481  | 0.3831  | 0.144455 |
| Hspa8         | chr9:40800983-40805200    | 152.3180 | 133.3604 | -0.1918 | 0.355552 |
| NA            | chr9:108032845-108032970  | 8.8260   | 1.7793   | -2.3104 | 0.241734 |
| Dkc1          | chrX:75095853-75109777    | 39.5578  | 33.0619  | -0.2588 | 0.367006 |
| Yy2           | chrX:157565946-157598650  | 4.0570   | 3.0018   | -0.4346 | 0.168130 |
| Phka2         | chrX:160502165-160598878  | 4.3880   | 5.4495   | 0.3126  | 0.067037 |
| Rab9          | chrX:166457252-166479867  | 9.7175   | 12.8369  | 0.4016  | 0.131264 |
| Enpp2         | chr15:54838897-54920146   | 0.7317   | 0.2854   | -1.3585 | 0.321961 |
| Sla           | chr15:66780818-66831829   | 58.9134  | 66.1877  | 0.1680  | 0.062976 |
| Map3k4        | chr17:12227620-12318660   | 18.9581  | 16.6122  | -0.1906 | 0.102919 |
| Pkmyt1        | chr17:23726335-23736729   | 8.8611   | 11.8074  | 0.4141  | 0.193644 |
| Gm15597       | chr17:27959614-27965316   | 1.2547   | 0.3007   | -2.0611 | 0.147873 |
| H2-Ke6        | chr17:34026032-34028060   | 48.2219  | 41.4587  | -0.2180 | 0.136025 |
| Gm20518       | chr16:17835276-17891671   | 19.9818  | 16.6960  | -0.2592 | 0.307286 |
| Noc3l         | chr19:38788127-38819237   | 18.0621  | 14.7209  | -0.2951 | 0.324655 |
| Sfxn2         | chr19:46573364-46596898   | 6.9613   | 5.5317   | -0.3317 | 0.029689 |
| Fam168b       | chr1:34813218-34843065    | 73.0376  | 66.2797  | -0.1401 | 0.134027 |
| Fzd5          | chr1:64730559-64737750    | 1.1680   | 1.6996   | 0.5412  | 0.106759 |
| Gm26720       | chr1:91989050-91992628    | 2.6851   | 1.8173   | -0.5632 | 0.227482 |
| Ddx18         | chr1:121553834-121567989  | 12.1333  | 9.6875   | -0.3248 | 0.158534 |
| Hnrnpu        | chr1:178323073-178337797  | 181.1664 | 162.4387 | -0.1574 | 0.280249 |
| Aldh7a1       | chr18:56509686-56572951   | 1.3438   | 1.9763   | 0.5565  | 0.152373 |
| 4930473A02Rik | chr2:130543790-130563749  | 11.5300  | 15.2266  | 0.4012  | 0.105766 |
| Tiparp        | chr3:65528409-65555145    | 6.6414   | 8.6306   | 0.3780  | 0.173395 |
| Wdr77         | chr3:105959368-105984600  | 15.3836  | 13.1657  | -0.2246 | 0.211380 |
| Ripk2         | chr4:16122732-16163647    | 10.4279  | 12.8367  | 0.2998  | 0.018558 |
| Gm16103       | chr1:43785909-43787188    | 1.3916   | 0.3867   | -1.8473 | 0.293275 |
| Anxa9         | chr3:95296095-95307176    | 0.1940   | 0.8042   | 2.0512  | 0.152918 |
| Mreg          | chr1:72159232-72212307    | 0.0772   | 0.3925   | 2.3463  | 0.200952 |
| Tgfb1         | chr13:56609602-56639339   | 0.0629   | 0.4271   | 2.7644  | 0.370344 |
| Fam64a        | chr11:72042031-72047370   | 3.0283   | 4.3877   | 0.5350  | 0.116029 |
| Rheb          | chr5:24802822-24842624    | 10.7520  | 9.1787   | -0.2282 | 0.112796 |
| Npas1         | chr7:16455720-16476780    | 0.7509   | 0.2433   | -1.6256 | 0.037083 |
| Adam9         | chr8:24949610-25016922    | 2.4392   | 3.6209   | 0.5700  | 0.162962 |
| 2700029M09Rik | chr8:60890417-60907580    | 20.2499  | 26.0660  | 0.3643  | 0.226837 |
| Snrpd1        | chr18:10617795-10628230   | 60.4431  | 45.6735  | -0.4042 | 0.353149 |
| Zdhhc12       | chr2:30090943-30093648    | 3.2459   | 5.0642   | 0.6417  | 0.182597 |
| Tctn2         | chr5:124598748-124627738  | 0.1541   | 0.0261   | -2.5609 | 0.367599 |
| Zfp1          | chr8:111643442-111671008  | 18.3361  | 14.7670  | -0.3123 | 0.210946 |
| Traj31        | chr14:54187894-54187951   | 168.0089 | 114.6282 | -0.5516 | 0.108576 |
| Pgap1         | chr1:54472999-54557684    | 5.5167   | 6.6651   | 0.2728  | 0.182480 |
| Gm16001       | chr5:124111108-124112241  | 3.9462   | 6.2061   | 0.6532  | 0.087714 |
| Lsm11         | chr11:45928268-45944935   | 3.6349   | 4.5035   | 0.3091  | 0.010466 |

|               |                           |          |          |         |          |
|---------------|---------------------------|----------|----------|---------|----------|
| Gm22275       | chr11:53701178-53701488   | 5.1299   | 2.0690   | -1.3100 | 0.023951 |
| Map2k3        | chr11:60932032-60952811   | 11.2913  | 9.1008   | -0.3112 | 0.185133 |
| Arf2          | chr11:103966738-103985337 | 5.5313   | 7.5290   | 0.4448  | 0.241735 |
| B3galnt2      | chr13:13954673-13999068   | 23.3187  | 20.0757  | -0.2160 | 0.186614 |
| Uso1          | chr5:92137937-92202794    | 10.0272  | 8.0725   | -0.3128 | 0.246214 |
| Ntrk3         | chr7:78192361-78578408    | 0.5917   | 0.2864   | -1.0469 | 0.106800 |
| A630091E08Rik | chr7:98543377-98562988    | 1.3718   | 2.8662   | 1.0631  | 0.014955 |
| Hmgb2         | chr8:57511842-57515999    | 5.5330   | 7.3210   | 0.4040  | 0.121881 |
| Gm10033       | chr8:69372144-69373383    | 6.8870   | 3.2240   | -1.0950 | 0.297029 |
| Hmox1         | chr8:75093590-75100596    | 1.1648   | 2.0266   | 0.7990  | 0.092792 |
| Anapc10       | chr8:79711819-79777321    | 2.8247   | 4.4532   | 0.6568  | 0.211169 |
| Msl2          | chr9:101074726-101104784  | 42.7237  | 37.8359  | -0.1753 | 0.213669 |
| 2010315B03Rik | chr9:124292990-124311750  | 15.0761  | 20.4294  | 0.4384  | 0.317758 |
| Card6         | chr15:5095980-5108539     | 5.0298   | 3.8141   | -0.3991 | 0.292017 |
| Dsc1          | chr15:55076098-55090491   | 1.0793   | 1.7051   | 0.6597  | 0.106389 |
| Pde1b         | chr15:103503297-103530052 | 12.8065  | 10.3948  | -0.3010 | 0.193031 |
| Brd4          | chr17:32196273-32284722   | 7.1269   | 5.7621   | -0.3067 | 0.330819 |
| Gm26858       | chr17:32369304-32378445   | 2.5516   | 3.7730   | 0.5643  | 0.015883 |
| Ly6g5b        | chr17:35113947-35115428   | 0.8998   | 2.2370   | 1.3140  | 0.044165 |
| Usp7          | chr16:8689594-8792308     | 60.2408  | 54.1412  | -0.1540 | 0.193991 |
| Ccdc116       | chr16:17139063-17147229   | 1.3832   | 0.9110   | -0.6025 | 0.001231 |
| Pola2         | chr19:5940542-5964206     | 21.2363  | 17.9259  | -0.2445 | 0.160149 |
| Prdx5         | chr19:6906696-6910106     | 22.0314  | 26.8045  | 0.2829  | 0.152673 |
| Hif1an        | chr19:44562849-44576274   | 13.2425  | 11.3866  | -0.2178 | 0.218783 |
| Atp2b4        | chr1:133702673-133801041  | 9.3545   | 12.1330  | 0.3752  | 0.380236 |
| Igfs9         | chr1:172481787-172498878  | 0.4650   | 0.2378   | -0.9676 | 0.106735 |
| Kif20a        | chr18:34624623-34633265   | 18.8914  | 22.4361  | 0.2481  | 0.123701 |
| Rbm27         | chr18:42275352-42341542   | 18.8491  | 16.5610  | -0.1867 | 0.152880 |
| Zadh2         | chr18:84088157-84097514   | 5.1525   | 3.9961   | -0.3667 | 0.035556 |
| Slc43a1       | chr2:84838849-84863594    | 1.4797   | 2.1369   | 0.5302  | 0.146381 |
| Lin7c         | chr2:109890852-109901003  | 21.4610  | 26.8205  | 0.3216  | 0.271809 |
| Stard7        | chr2:127270217-127298932  | 20.8183  | 18.5033  | -0.1701 | 0.058004 |
| Spata5        | chr3:37419895-37579096    | 27.7006  | 24.0561  | -0.2035 | 0.152431 |
| Mex3a         | chr3:88532394-88541396    | 1.1509   | 0.5939   | -0.9545 | 0.201118 |
| Rps20         | chr4:3831333-3835665      | 38.4996  | 47.8247  | 0.3129  | 0.348916 |
| Slco2a1       | chr9:103008488-103087849  | 0.3421   | 0.0844   | -2.0194 | 0.302312 |
| Impg2         | chr16:56204312-56273756   | 0.4931   | 0.1936   | -1.3487 | 0.351431 |
| Ernm          | chr2:58045112-58052864    | 0.0617   | 0.2881   | 2.2220  | 0.174647 |
| NA            | chr11:97840779-97843043   | 0.1415   | 0.7788   | 2.4609  | 0.125543 |
| Zfp276        | chr8:123254194-123269745  | 10.1533  | 8.3796   | -0.2770 | 0.230729 |
| 9930022D16Rik | chr11:109413916-109420405 | 0.1185   | 0.5263   | 2.1514  | 0.207133 |
| Gm13421       | chr2:27540425-27543362    | 2.5634   | 0.9144   | -1.4872 | 0.335160 |
| Gm26315       | chr2:7076093-7076414      | 1.9368   | 5.0458   | 1.3814  | 0.160606 |
| G730003C15Rik | chr1:59119832-59122139    | 0.0927   | 0.4300   | 2.2144  | 0.087311 |
| Slc35b1       | chr11:95384691-95391776   | 14.8131  | 18.3260  | 0.3070  | 0.092686 |
| Ramp2         | chr11:101246027-101259546 | 12.6745  | 10.3805  | -0.2880 | 0.193565 |
| Gm27014       | chr12:54963063-54964200   | 3.9630   | 2.1772   | -0.8642 | 0.110195 |
| Mcur1         | chr13:43538411-43560191   | 9.1870   | 7.4385   | -0.3046 | 0.210300 |
| Habp4         | chr13:64161865-64186536   | 8.8574   | 6.7104   | -0.4005 | 0.252041 |
| Bdp1          | chr13:100017993-100104070 | 23.4245  | 20.5398  | -0.1896 | 0.249938 |
| Gm26931       | chr5:34481913-34482522    | 4.2673   | 2.0490   | -1.0584 | 0.037325 |
| Atxn2         | chr5:121711336-121816493  | 4.9796   | 4.0387   | -0.3021 | 0.195622 |
| Atp2a2        | chr5:122442701-122502225  | 47.6864  | 42.8378  | -0.1547 | 0.162684 |
| Trbv3         | chr6:41048393-41048824    | 138.5914 | 170.0153 | 0.2948  | 0.174186 |
| Rarres2       | chr6:48569697-48572670    | 7.7598   | 4.2506   | -0.8683 | 0.208424 |
| Tmem135       | chr7:89139722-89404222    | 9.6731   | 8.3057   | -0.2199 | 0.067055 |
| Crtc1         | chr8:70382354-70439579    | 1.6152   | 1.1695   | -0.4658 | 0.239023 |
| Ppib          | chr9:66060168-66066629    | 201.8784 | 238.8994 | 0.2429  | 0.264932 |
| Gm17040       | chr9:107292434-107297192  | 7.9303   | 4.9237   | -0.6876 | 0.301805 |
| C330013E15Rik | chr15:100614139-100615110 | 0.7536   | 1.9414   | 1.3653  | 0.181044 |
| Kpna2-ps      | chr17:47620770-47622339   | 12.5276  | 9.5578   | -0.3903 | 0.174120 |
| Mocs1         | chr17:49428361-49455435   | 9.0944   | 6.9338   | -0.3913 | 0.345197 |
| Gm4707        | chr17:71458326-71460395   | 5.0102   | 7.0357   | 0.4898  | 0.148376 |
| H3f3aos       | chr1:180813775-180816859  | 2.5198   | 3.8697   | 0.6189  | 0.157289 |
| Suv39h2       | chr2:3455814-3475031      | 3.1992   | 2.2907   | -0.4819 | 0.192157 |
| Sh2d3c        | chr2:32721054-32755512    | 15.0841  | 12.3589  | -0.2875 | 0.322635 |
| Cacnb4        | chr2:52428319-52676831    | 0.5383   | 0.3059   | -0.8151 | 0.245333 |
| Itga4         | chr2:79255425-79333123    | 47.1268  | 55.7890  | 0.2434  | 0.343312 |
| Adal          | chr2:121140427-121156680  | 6.2293   | 5.0310   | -0.3082 | 0.135857 |
| Hdc           | chr2:126593666-126619299  | 0.0439   | 0.1852   | 2.0752  | 0.076658 |
| Zc3h6         | chr2:128967401-129018563  | 6.4876   | 7.9897   | 0.3005  | 0.115290 |



|               |                           |          |          |         |          |
|---------------|---------------------------|----------|----------|---------|----------|
| Atxn7l2       | chr3:108202221-108210934  | 3.0627   | 2.1421   | -0.5158 | 0.230532 |
| Sort1         | chr3:108284090-108361511  | 0.3309   | 0.1416   | -1.2245 | 0.234037 |
| Ddx58         | chr4:40203772-40239828    | 24.9119  | 29.4334  | 0.2406  | 0.234708 |
| Pomc          | chr12:3954950-3960618     | 0.2744   | 1.0198   | 1.8940  | 0.095576 |
| Gm24447       | chr15:93234362-93234700   | 0.5861   | 3.0342   | 2.3721  | 0.132999 |
| Wdr89         | chr12:75630593-75669537   | 5.0084   | 3.7648   | -0.4118 | 0.118547 |
| Atxn1         | chr13:45549757-45964991   | 13.8385  | 16.6077  | 0.2632  | 0.284172 |
| Casd1         | chr6:4600839-4643381      | 16.9638  | 21.3756  | 0.3335  | 0.257952 |
| Gm6939        | chr7:126687458-126690034  | 3.4017   | 1.4628   | -1.2176 | 0.316385 |
| BC065403      | chr9:72361734-72409943    | 17.0215  | 12.5991  | -0.4340 | 0.223260 |
| Glb1          | chr9:114401075-114474376  | 20.6610  | 24.7827  | 0.2624  | 0.103991 |
| Rab39b        | chrX:75572045-75578231    | 2.2855   | 3.3779   | 0.5636  | 0.143764 |
| Decr2         | chr17:26081210-26090329   | 7.7559   | 10.2084  | 0.3964  | 0.165916 |
| Yipf3         | chr17:46248079-46252537   | 21.0096  | 25.4315  | 0.2756  | 0.195228 |
| Trpt1         | chr19:6996130-6999044     | 9.2402   | 6.4831   | -0.5112 | 0.149301 |
| 1110058L19Rik | chr1:23995938-24005656    | 4.6367   | 7.5972   | 0.7124  | 0.175724 |
| Srp9          | chr1:182124736-182132407  | 22.4383  | 28.6401  | 0.3521  | 0.209638 |
| Rnf14         | chr18:38296634-38317847   | 22.3535  | 25.8607  | 0.2103  | 0.016603 |
| Arl6ip6       | chr2:53191725-53219220    | 10.3047  | 8.2898   | -0.3139 | 0.094234 |
| Ndufs3        | chr2:90894633-90904827    | 13.6928  | 17.5126  | 0.3550  | 0.166681 |
| Phox2a        | chr7:101818312-101823166  | 0.2915   | 0.7854   | 1.4296  | 0.028257 |
| Necab3        | chr2:154544398-154558890  | 0.1426   | 0.5558   | 1.9629  | 0.102624 |
| BC024978      | chr7:27195780-27205386    | 2.6032   | 1.6648   | -0.6449 | 0.137443 |
| Prkrip1       | chr5:136178126-136198963  | 4.8376   | 6.1289   | 0.3413  | 0.035801 |
| Nudt8         | chr19:4000579-4005816     | 2.2243   | 3.0461   | 0.4536  | 0.050748 |
| Kansl1l       | chr1:66719247-66817562    | 11.9999  | 9.8046   | -0.2915 | 0.392422 |
| Polr3k        | chr2:181864336-181870830  | 13.5154  | 11.3046  | -0.2577 | 0.118169 |
| Hypk          | chr2:121453289-121458672  | 11.0625  | 9.4305   | -0.2303 | 0.125574 |
| 1700021J08Rik | chr4:117002165-117003012  | 12.1614  | 17.4070  | 0.5174  | 0.092676 |
| Ado           | chr10:67544511-67548955   | 12.1712  | 14.6991  | 0.2723  | 0.140184 |
| Mmp11         | chr10:75923221-75932502   | 2.4159   | 1.4654   | -0.7213 | 0.199195 |
| Rad50         | chr11:53649518-53707319   | 25.2106  | 22.0982  | -0.1901 | 0.180883 |
| Arl4a         | chr12:40005446-40038025   | 4.3851   | 5.6339   | 0.3615  | 0.237682 |
| Scfd1         | chr12:51377579-51450096   | 35.0336  | 41.4249  | 0.2418  | 0.123115 |
| Pdlim7        | chr13:55495794-55513676   | 0.9272   | 1.4826   | 0.6771  | 0.179815 |
| Recql         | chr6:142350341-142387087  | 14.1359  | 12.5068  | -0.1766 | 0.061927 |
| Ermard        | chr17:15041640-15064232   | 4.2264   | 5.7607   | 0.4468  | 0.076668 |
| Ergic1        | chr17:26561488-26656931   | 12.4302  | 14.5100  | 0.2232  | 0.088376 |
| Unc5cl        | chr17:48454900-48539714   | 4.1892   | 5.6513   | 0.4319  | 0.106827 |
| Dnmbp         | chr19:43847966-43912392   | 5.4473   | 4.1941   | -0.3772 | 0.250734 |
| Gm13709       | chr2:73370908-73379297    | 1.4368   | 4.0311   | 1.4884  | 0.228573 |
| A330069E16Rik | chr2:91237145-91238352    | 0.4334   | 1.6393   | 1.9193  | 0.059329 |
| Cdkn1a        | chr17:29090978-29100722   | 0.2608   | 0.7783   | 1.5775  | 0.205273 |
| Zak           | chr2:72285636-72442610    | 0.0751   | 0.2623   | 1.8046  | 0.373796 |
| Kdm2a         | chr19:4316143-4398285     | 21.7132  | 19.6994  | -0.1404 | 0.083702 |
| Gm26788       | chr1:34165855-34178271    | 6.3199   | 3.6681   | -0.7849 | 0.448052 |
| Sac3d1        | chr19:6116003-6118586     | 5.1138   | 8.0334   | 0.6516  | 0.228914 |
| ltpa          | chr2:130667609-130681614  | 7.6756   | 10.0082  | 0.3828  | 0.087717 |
| Gm23925       | chr2:158359797-158359929  | 35.0298  | 19.4915  | -0.8457 | 0.093308 |
| Xpa           | chr4:46155346-46196311    | 14.3372  | 17.9049  | 0.3206  | 0.087794 |
| Snrp27        | chr6:86675220-86684522    | 15.3743  | 20.2567  | 0.3979  | 0.244812 |
| Mthfsd        | chr8:121095011-121108392  | 8.6759   | 6.9252   | -0.3252 | 0.326195 |
| Slc37a4       | chr9:44398175-44402963    | 9.4836   | 12.5905  | 0.4088  | 0.161425 |
| Ash1l         | chr3:88965811-89079373    | 26.3511  | 23.1656  | -0.1859 | 0.284747 |
| 3010003L21Rik | chr6:148944866-148947129  | 3.6058   | 1.8897   | -0.9322 | 0.208483 |
| Kptn          | chr7:16119894-16127516    | 7.3861   | 5.9048   | -0.3229 | 0.129513 |
| Aen           | chr7:78895853-78911209    | 9.9376   | 8.4778   | -0.2292 | 0.149972 |
| Vps13b        | chr15:35371545-35931228   | 32.6193  | 28.8144  | -0.1789 | 0.318852 |
| Tmem81        | chr1:132506229-132508637  | 7.5396   | 5.5411   | -0.4443 | 0.148371 |
| Gm12944       | chr4:127056261-127056724  | 2.4031   | 0.6420   | -1.9043 | 0.147414 |
| Alg3          | chr16:20605450-20610768   | 9.9171   | 7.4682   | -0.4091 | 0.047072 |
| Zfp866        | chr8:69761325-69791178    | 20.7745  | 17.9196  | -0.2133 | 0.261593 |
| Ogt           | chrX:101640059-101684351  | 78.0663  | 68.6188  | -0.1861 | 0.358135 |
| Stim2         | chr5:53998416-54121057    | 30.7707  | 27.7342  | -0.1499 | 0.044502 |
| Entpd6        | chr2:150749041-150771675  | 11.4481  | 13.5879  | 0.2472  | 0.077640 |
| Gm11715       | chr11:107157407-107167150 | 8.3430   | 12.9579  | 0.6352  | 0.181588 |
| Khk           | chr5:30921555-30931246    | 3.3465   | 4.9887   | 0.5760  | 0.041699 |
| 4933434E20Rik | chr3:90051635-90063341    | 20.1443  | 16.7558  | -0.2657 | 0.343802 |
| 4933424M12Rik | chr4:107787848-107789921  | 0.7054   | 0.1418   | -2.3147 | 0.210791 |
| Dgka          | chr10:128720140-128744056 | 254.4075 | 232.5220 | -0.1298 | 0.150434 |
| Foxk2         | chr11:121259989-121309896 | 13.8377  | 11.3383  | -0.2874 | 0.363061 |

|               |                           |          |          |         |          |
|---------------|---------------------------|----------|----------|---------|----------|
| Gm25776       | chr12:91573429-91573572   | 19.3227  | 37.9755  | 0.9748  | 0.365166 |
| Arhgef1       | chr7:24902911-24926592    | 79.0029  | 69.2889  | -0.1893 | 0.356769 |
| Spty2d1       | chr7:46990395-47008411    | 17.3076  | 14.6281  | -0.2427 | 0.314839 |
| 2810455O05Rik | chr8:123838552-123840785  | 4.1114   | 2.5038   | -0.7155 | 0.183275 |
| Jrkl          | chr9:13242789-13245741    | 9.9506   | 8.1913   | -0.2807 | 0.055054 |
| Map2k1        | chr9:64185769-64253631    | 22.8505  | 27.1839  | 0.2505  | 0.189587 |
| Rps27l        | chr9:66946085-66949516    | 27.5474  | 39.1466  | 0.5704  | 0.274995 |
| Gm6630        | chr16:23179555-23180011   | 7.1265   | 3.6387   | -0.9697 | 0.087692 |
| Cd44          | chr2:102811140-102901665  | 25.6250  | 29.9475  | 0.2249  | 0.206005 |
| Nfx1          | chr4:40970905-41025993    | 27.8175  | 25.2637  | -0.1389 | 0.056433 |
| Ski           | chr4:155154074-155222592  | 30.1713  | 25.7852  | -0.2266 | 0.339007 |
| E230016M11Rik | chr6:67036598-67080654    | 0.6739   | 1.2395   | 0.8792  | 0.062188 |
| 4930579O11Rik | chr8:81665875-81667118    | 0.4903   | 1.7152   | 1.8067  | 0.187777 |
| Akr1c18       | chr13:4132614-4150654     | 4.0817   | 2.0664   | -0.9821 | 0.264906 |
| Mrpl32        | chr13:14610300-14613037   | 38.1980  | 49.0250  | 0.3600  | 0.237009 |
| Cep41         | chr6:30653456-30693749    | 4.6385   | 3.6708   | -0.3376 | 0.142070 |
| Pcgf1         | chr6:83077868-83080855    | 5.7286   | 3.8151   | -0.5865 | 0.120835 |
| Akt2          | chr7:27591551-27640826    | 13.5244  | 11.7755  | -0.1998 | 0.206676 |
| Picalm        | chr7:90130231-90209447    | 81.6621  | 91.6338  | 0.1662  | 0.054254 |
| Wdr4          | chr17:31494322-31519974   | 6.3524   | 5.2480   | -0.2755 | 0.107224 |
| Sik1          | chr17:31844247-31855792   | 8.2268   | 6.8650   | -0.2611 | 0.092448 |
| Blvra         | chr2:127070664-127097084  | 9.1453   | 12.1470  | 0.4095  | 0.217716 |
| O610039K10Rik | chr2:163644849-163645800  | 8.2075   | 5.0955   | -0.6877 | 0.305740 |
| 4933421O10Rik | chr4:33027141-33031323    | 0.9999   | 1.6187   | 0.6950  | 0.062527 |
| Ppt1          | chr4:122836241-122859175  | 26.3442  | 31.2284  | 0.2454  | 0.193961 |
| C230038L03Rik | chr7:96947577-96951886    | 0.1246   | 0.4758   | 1.9333  | 0.077060 |
| Gm5976        | chr1:52503233-52504229    | 0.2574   | 1.4330   | 2.4771  | 0.371903 |
| Dmxl2         | chr9:54365157-54501760    | 0.0306   | 0.1218   | 1.9955  | 0.216863 |
| Thoc5         | chr11:4895319-4928867     | 29.9756  | 25.9346  | -0.2089 | 0.167779 |
| Tmem154       | chr3:84666191-84704575    | 25.7637  | 30.1133  | 0.2251  | 0.176035 |
| 4921513D11Rik | chr17:79626676-79628681   | 0.1746   | 0.7984   | 2.1931  | 0.133140 |
| Pter          | chr2:12924040-13003453    | 0.4494   | 1.0587   | 1.2361  | 0.140814 |
| Rab5b         | chr10:128677192-128696268 | 11.5969  | 14.4009  | 0.3124  | 0.154964 |
| Obscn         | chr11:58994255-59136402   | 0.0704   | 0.0208   | -1.7568 | 0.399513 |
| Spag5         | chr11:78301528-78322457   | 6.9579   | 8.6587   | 0.3155  | 0.236008 |
| Sept4         | chr11:87568902-87590539   | 0.8716   | 0.4687   | -0.8951 | 0.077811 |
| Gm21989       | chr12:20990458-21200919   | 1.1530   | 0.5192   | -1.1510 | 0.059543 |
| Bcd2          | chr13:49341548-49387025   | 15.5060  | 13.5254  | -0.1972 | 0.192925 |
| 5430403G16Rik | chr5:109674544-109691041  | 6.6323   | 4.9673   | -0.4170 | 0.259620 |
| Gm15751       | chr5:123508394-123514011  | 12.0659  | 9.6898   | -0.3164 | 0.053361 |
| Rilpl1        | chr5:124493081-124531391  | 3.2316   | 1.9435   | -0.7336 | 0.366461 |
| Gm24105       | chr5:149247953-149248244  | 4.8709   | 10.4391  | 1.0997  | 0.198164 |
| Trbj2-7       | chr6:41543809-41543856    | 279.7594 | 184.0967 | -0.6037 | 0.397782 |
| Lrrc29        | chr8:105312340-105326276  | 4.0801   | 2.4253   | -0.7505 | 0.324406 |
| Wwox          | chr8:114439654-115352708  | 0.9340   | 1.3453   | 0.5264  | 0.261244 |
| Dnaja4        | chr9:54698872-54716315    | 3.7103   | 4.9019   | 0.4018  | 0.065244 |
| Gpx1          | chr9:108339079-108340338  | 115.3580 | 138.0226 | 0.2588  | 0.268380 |
| Gpt           | chr15:76696763-76699674   | 4.5865   | 2.7283   | -0.7494 | 0.157088 |
| Fbxo11        | chr17:87990858-88065291   | 24.4584  | 20.7359  | -0.2382 | 0.323974 |
| Cd200r1       | chr16:44765735-44794978   | 20.5281  | 24.8598  | 0.2762  | 0.129740 |
| Neat1         | chr19:5824707-5845478     | 12.6021  | 10.9151  | -0.2073 | 0.379724 |
| Unc50         | chr1:37430169-37439124    | 21.2146  | 27.1198  | 0.3543  | 0.239119 |
| Ndr3          | chr2:156927344-156992056  | 13.8893  | 12.2353  | -0.1829 | 0.135460 |
| Stag3         | chr5:138280239-138312393  | 0.0969   | 0.3317   | 1.7747  | 0.101959 |
| Ncoa1         | chr12:4247362-4477182     | 12.7805  | 10.8241  | -0.2397 | 0.320662 |
| Eno2          | chr6:124760052-124769673  | 1.5972   | 1.0439   | -0.6136 | 0.205171 |
| Hnrnpa2b1     | chr6:51460433-51469894    | 148.6473 | 132.9079 | -0.1615 | 0.304435 |
| Git1          | chr11:77493561-77507786   | 9.6189   | 7.7389   | -0.3137 | 0.300982 |
| Ndufa4        | chr6:11900372-11907446    | 143.3221 | 172.9876 | 0.2714  | 0.211952 |
| Hectd2        | chr19:36554638-36621135   | 1.8892   | 1.4219   | -0.4099 | 0.196092 |
| Gm25363       | chr5:24820592-24820837    | 7.4956   | 1.8592   | -2.0114 | 0.329666 |
| Slc22a23      | chr13:34179157-34345182   | 0.9888   | 0.5579   | -0.8257 | 0.364624 |
| Irf8          | chr8:120736357-120756694  | 11.0477  | 9.3522   | -0.2404 | 0.281319 |
| Atat1         | chr17:35897594-35910075   | 1.2867   | 1.8737   | 0.5422  | 0.056118 |
| Txnrd2        | chr16:18426416-18479073   | 3.4579   | 4.8675   | 0.4933  | 0.137668 |
| Mrto4         | chr4:139347434-139352576  | 12.3155  | 9.6222   | -0.3560 | 0.293156 |
| Gm26640       | chr6:72953235-72957249    | 1.4898   | 2.4384   | 0.7108  | 0.247022 |
| Dpm3          | chr3:89259357-89267079    | 10.2560  | 15.2341  | 0.5708  | 0.195469 |
| Alkbh6        | chr7:30308716-30314304    | 9.8950   | 12.1661  | 0.2981  | 0.105052 |
| Zfp229        | chr17:21730794-21769342   | 0.8802   | 0.5185   | -0.7636 | 0.146428 |
| Rbm14         | chr19:4800568-4811634     | 23.3846  | 20.2355  | -0.2087 | 0.218054 |

|               |                           |          |          |         |          |
|---------------|---------------------------|----------|----------|---------|----------|
| Tvp23b        | chr11:62879454-62916780   | 12.8256  | 10.5049  | -0.2880 | 0.103996 |
| Pim2          | chrX:7878261-7883432      | 4.0981   | 5.6140   | 0.4541  | 0.169010 |
| Ifft140       | chr17:25016090-25099495   | 7.7130   | 6.4983   | -0.2472 | 0.230549 |
| Ppp1r18       | chr17:35865592-35875596   | 30.5990  | 35.4600  | 0.2127  | 0.189436 |
| Ubash3b       | chr9:41011097-41161697    | 22.6396  | 20.3598  | -0.1531 | 0.088897 |
| Tomm70a       | chr16:57121713-57154530   | 71.6260  | 62.1647  | -0.2044 | 0.343533 |
| Cbx2          | chr11:119022961-119031270 | 4.5754   | 3.4499   | -0.4074 | 0.214675 |
| Ankrd9        | chr12:110975352-110979040 | 1.0188   | 1.6459   | 0.6921  | 0.079161 |
| Eid2          | chr7:28267880-28269165    | 1.1455   | 2.8239   | 1.3017  | 0.133832 |
| Ddc           | chr11:11814100-11898144   | 0.9979   | 1.5971   | 0.6786  | 0.123529 |
| Parp2         | chr14:50807945-50821300   | 44.2037  | 37.7867  | -0.2263 | 0.217340 |
| Naa15         | chr3:51416015-51475985    | 19.3373  | 16.5882  | -0.2212 | 0.280032 |
| Hes5          | chr4:154960922-154962371  | 1.1126   | 0.3146   | -1.8223 | 0.161597 |
| Unc45a        | chr7:80325291-80341005    | 13.0059  | 15.4176  | 0.2454  | 0.080318 |
| Pop4          | chr7:38262819-38271348    | 19.4243  | 25.0825  | 0.3688  | 0.142532 |
| Rai14         | chr15:10568978-10714631   | 0.6362   | 1.0746   | 0.7563  | 0.212005 |
| Adrbk2        | chr5:112910477-113015514  | 0.4892   | 0.2407   | -1.0229 | 0.274163 |
| Zbtb11        | chr16:55966274-56008913   | 20.2587  | 17.7579  | -0.1901 | 0.248398 |
| Pex7          | chr10:19859928-19907689   | 5.9339   | 7.7867   | 0.3920  | 0.101107 |
| Gm26668       | chr11:102863336-103075903 | 3.1413   | 2.2490   | -0.4821 | 0.163042 |
| Gm15911       | chr13:55602181-55604783   | 6.4263   | 3.4065   | -0.9157 | 0.200654 |
| Tnip3         | chr6:65590397-65634040    | 1.2721   | 2.0989   | 0.7225  | 0.146091 |
| Nob1          | chr8:107412485-107425051  | 8.1475   | 6.4269   | -0.3422 | 0.246605 |
| S1pr2         | chr9:20965951-20976793    | 6.1073   | 7.8285   | 0.3582  | 0.071075 |
| Abhd14a       | chr9:106440050-106447678  | 5.2258   | 3.3836   | -0.6271 | 0.132665 |
| Gm24453       | chr19:8724867-8724943     | 63.7367  | 37.3554  | -0.7708 | 0.131437 |
| R3hcc1l       | chr19:42518758-42592343   | 8.2654   | 7.1407   | -0.2110 | 0.093976 |
| Pdia3         | chr2:121413774-121438687  | 112.8583 | 127.9209 | 0.1807  | 0.135985 |
| Zhx3          | chr2:160743926-160872998  | 9.3941   | 8.0190   | -0.2283 | 0.335180 |
| 1810022K09Rik | chr3:14606319-14611221    | 45.4110  | 58.1606  | 0.3570  | 0.198158 |
| Gm17089       | chr6:134233157-134243711  | 0.8114   | 1.9897   | 1.2940  | 0.095894 |
| Gm17191       | chr12:81532034-81533358   | 5.2215   | 1.5755   | -1.7286 | 0.415691 |
| 4931403G20Rik | chr12:69847634-69853671   | 0.8173   | 0.2729   | -1.5828 | 0.129626 |
| Gpr146        | chr5:139377741-139396415  | 9.5762   | 8.1590   | -0.2311 | 0.216447 |
| Dhrs11        | chr11:84820855-84828994   | 4.3720   | 6.3649   | 0.5418  | 0.183914 |
| Zfp58         | chr13:67490166-67500555   | 14.0196  | 11.5710  | -0.2769 | 0.137033 |
| Smg9          | chr7:24399618-24422778    | 15.9469  | 13.0424  | -0.2901 | 0.322334 |
| Ppp2r2d       | chr7:138846078-138883057  | 8.6252   | 10.2051  | 0.2427  | 0.058536 |
| Gm4890        | chr8:79295122-79307685    | 1.0728   | 1.8616   | 0.7951  | 0.090775 |
| Glyctk        | chr9:106152856-106158138  | 2.6717   | 3.7162   | 0.4761  | 0.222501 |
| Ppp1ca        | chr19:4192157-4195419     | 323.5434 | 371.6101 | 0.1998  | 0.230970 |
| Cpne1         | chr2:156071844-156111959  | 40.2981  | 36.4572  | -0.1445 | 0.131810 |
| Atp1a1        | chr3:101576218-101604603  | 120.1577 | 108.8754 | -0.1423 | 0.246718 |
| Sesn2         | chr4:132492031-132510501  | 4.3326   | 3.0581   | -0.5026 | 0.269077 |
| Morn2         | chr17:80290211-80297473   | 0.9948   | 3.3242   | 1.7405  | 0.205906 |
| Pacs1         | chr19:5133687-5273119     | 16.3812  | 13.3417  | -0.2961 | 0.368357 |
| Gpr171        | chr3:59096447-59101821    | 31.1267  | 36.8877  | 0.2450  | 0.145117 |
| Nbr1          | chr11:101552148-101581951 | 26.6822  | 30.4878  | 0.1924  | 0.104921 |
| Bod1l         | chr5:41787541-41844168    | 36.6882  | 32.9983  | -0.1529 | 0.220998 |
| Hpse          | chr5:100679483-100719716  | 1.0949   | 1.9473   | 0.8307  | 0.249422 |
| Gm15243       | chrX:160527500-160533045  | 2.8070   | 6.5659   | 1.2260  | 0.164824 |
| Myo10         | chr15:25622524-25813673   | 1.2703   | 0.9148   | -0.4737 | 0.209791 |
| A930007I19Rik | chr19:29486354-29523159   | 0.0690   | 0.2916   | 2.0799  | 0.268900 |
| Aldh3a2       | chr11:61223416-61267464   | 10.9977  | 12.8413  | 0.2236  | 0.036212 |
| Mlst8         | chr17:24473549-24479078   | 10.8955  | 9.0909   | -0.2612 | 0.083023 |
| Zfp563        | chr17:33089309-33106203   | 1.9384   | 3.3697   | 0.7978  | 0.195506 |
| Gm12042       | chr11:21295559-21295860   | 3.3367   | 8.6755   | 1.3785  | 0.214950 |
| Babam1        | chr8:71396854-71404772    | 33.1926  | 41.0099  | 0.3051  | 0.234029 |
| Rsrc2         | chr5:123728425-123749414  | 35.3310  | 32.1835  | -0.1346 | 0.076295 |
| Agpat3        | chr10:78269177-78352489   | 25.0665  | 22.0740  | -0.1834 | 0.273539 |
| Apc2          | chr10:80295976-80318263   | 1.2730   | 0.9384   | -0.4399 | 0.185034 |
| Phykpl        | chr11:51584756-51604489   | 30.1407  | 27.2925  | -0.1432 | 0.163288 |
| Slirp         | chr12:87443895-87452206   | 38.3848  | 44.4432  | 0.2114  | 0.117640 |
| Paxip1        | chr5:27740666-27791339    | 12.0104  | 10.0362  | -0.2591 | 0.274161 |
| N4bp2         | chr5:65763520-65830108    | 9.7235   | 8.3008   | -0.2282 | 0.300572 |
| Ccdc64        | chr5:115648174-115731621  | 16.4182  | 14.5052  | -0.1787 | 0.108084 |
| Frmd4b        | chr6:97286866-97617541    | 2.5383   | 3.3433   | 0.3974  | 0.238254 |
| Lin37         | chr7:30555440-30559838    | 15.4355  | 12.4007  | -0.3158 | 0.054480 |
| Arhgef10      | chr8:14911662-15001085    | 2.4546   | 1.9190   | -0.3552 | 0.177904 |
| Nme6          | chr9:109832748-109843116  | 1.8188   | 2.8831   | 0.6646  | 0.180128 |
| Rbm3os        | chrX:8145428-8147964      | 5.1497   | 3.2544   | -0.6621 | 0.032348 |

|               |                           |          |          |         |          |
|---------------|---------------------------|----------|----------|---------|----------|
| Ddx3x         | chrX:13280969-13294052    | 88.7424  | 102.3877 | 0.2063  | 0.247626 |
| Gm6382        | chrX:142210883-142211825  | 1.5090   | 0.4941   | -1.6106 | 0.211120 |
| Lst1          | chr17:35185094-35188439   | 3.2480   | 6.4006   | 0.9787  | 0.143182 |
| Fem1a         | chr17:56256792-56263608   | 17.6018  | 15.5782  | -0.1762 | 0.161376 |
| Gm14965       | chr19:6409399-6418606     | 0.9765   | 2.1081   | 1.1102  | 0.179779 |
| Pdcd4         | chr19:53892230-53929861   | 142.0938 | 127.4175 | -0.1573 | 0.270653 |
| Ormdl1        | chr1:53297094-53310309    | 8.5130   | 10.2373  | 0.2661  | 0.092855 |
| Arpc5         | chr1:152766541-152775597  | 142.2252 | 164.9593 | 0.2139  | 0.263830 |
| Gm26865       | chr18:4373668-4379980     | 3.6814   | 2.7774   | -0.4065 | 0.016890 |
| Lypd6b        | chr2:49787687-49948849    | 2.8310   | 1.7006   | -0.7352 | 0.277892 |
| Atg13         | chr2:91674617-91710576    | 7.0542   | 5.7402   | -0.2974 | 0.174547 |
| Tmem230       | chr2:132239491-132247807  | 6.3571   | 4.8551   | -0.3889 | 0.218466 |
| Epb4.111      | chr3:156420908-156543214  | 0.2676   | 0.1479   | -0.8557 | 0.015346 |
| Ect2          | chr3:27097221-27153878    | 6.5398   | 8.1347   | 0.3148  | 0.225688 |
| 4731419I09Rik | chr3:89337849-89347831    | 2.2551   | 1.2998   | -0.7949 | 0.262598 |
| Ubap2l        | chr3:89999588-90052475    | 35.9854  | 32.6453  | -0.1405 | 0.068461 |
| Grhpr         | chr4:44981394-44990734    | 6.2537   | 8.4417   | 0.4328  | 0.068371 |
| Tmem38b       | chr4:53826044-53862019    | 2.0986   | 2.9782   | 0.5050  | 0.165684 |
| Tardbp        | chr4:148612381-148627019  | 38.0343  | 33.9035  | -0.1659 | 0.261095 |
| Gm10275       | chr10:29698745-29699379   | 1.3473   | 4.2812   | 1.6680  | 0.261644 |
| Gm12248       | chr11:58063827-58072937   | 0.4051   | 1.4911   | 1.8800  | 0.064700 |
| NA            | chr11:86317265-86317487   | 1.7314   | 7.0410   | 2.0238  | 0.295738 |
| Trbj1-5       | chr6:41535083-41535133    | 72.0024  | 126.7267 | 0.8156  | 0.110145 |
| Gm15720       | chr6:14646325-146463607   | 3.6768   | 8.3326   | 1.1803  | 0.176181 |
| A130014A01Rik | chr8:120101581-120103904  | 1.3903   | 2.9344   | 1.0776  | 0.161610 |
| Gm25394       | chr13:49684300-49684433   | 4.9440   | 14.1714  | 1.5192  | 0.172688 |
| Gm23094       | chr8:25678949-25679271    | 8.0455   | 3.1855   | -1.3367 | 0.432152 |
| Gm14154       | chr2:151947272-151950641  | 1.1154   | 3.1561   | 1.5006  | 0.138316 |
| Gm16033       | chr11:46143782-46147116   | 35.8215  | 26.7543  | -0.4211 | 0.284931 |
| Clk4          | chr11:51261729-51281766   | 38.1001  | 34.0022  | -0.1642 | 0.222817 |
| Ulk2          | chr11:61775648-61855073   | 10.3967  | 12.2437  | 0.2359  | 0.106119 |
| Chrnbl        | chr11:69784035-69795943   | 2.2906   | 1.4612   | -0.6486 | 0.154703 |
| Pecam1        | chr11:106654216-106750628 | 59.3954  | 53.2447  | -0.1577 | 0.232082 |
| Ankmy2        | chr12:36157123-36197291   | 28.5819  | 24.7808  | -0.2059 | 0.117946 |
| Papln         | chr12:83763633-83792382   | 0.2740   | 0.0739   | -1.8912 | 0.113940 |
| Fosl2         | chr5:32136471-32157831    | 1.6549   | 2.4234   | 0.5503  | 0.296932 |
| Hopxos        | chr5:77094531-77102303    | 13.1970  | 16.5624  | 0.3277  | 0.098442 |
| Paqr3         | chr5:97082328-97111596    | 3.0384   | 3.8611   | 0.3457  | 0.159313 |
| Ppp1r35       | chr5:137778848-13780110   | 15.0695  | 19.4934  | 0.3713  | 0.100104 |
| Prkar1b       | chr5:139017305-139150001  | 1.2353   | 0.6855   | -0.8496 | 0.219114 |
| Slc46a3       | chr5:147878436-147894815  | 5.1393   | 6.6396   | 0.3695  | 0.003326 |
| Plekha8       | chr6:54595110-54645839    | 0.9717   | 1.3821   | 0.5083  | 0.081649 |
| Ash2l         | chr8:25816190-25847694    | 16.6295  | 19.4338  | 0.2248  | 0.157898 |
| Slc7a6        | chr8:106168874-106198704  | 19.1611  | 16.6683  | -0.2011 | 0.140295 |
| Prmt7         | chr8:106210935-106252794  | 8.0776   | 6.6826   | -0.2735 | 0.281047 |
| Snx33         | chr9:56917199-56928371    | 8.6655   | 10.3257  | 0.2529  | 0.037261 |
| Alas2         | chrX:150547374-150570638  | 0.7768   | 1.4872   | 0.9371  | 0.236675 |
| Trav3-3       | chr14:53665928-53666505   | 2.8569   | 6.8118   | 1.2536  | 0.095776 |
| Foxp4         | chr17:47867132-47924645   | 6.4390   | 4.9893   | -0.3680 | 0.290718 |
| Slc30a6       | chr17:74395607-74424229   | 8.0186   | 6.1494   | -0.3829 | 0.166169 |
| Dtx4          | chr19:12466340-12501996   | 2.3767   | 3.3459   | 0.4934  | 0.241976 |
| Zbed6         | chr1:133619939-133661318  | 26.6603  | 23.1771  | -0.2020 | 0.359586 |
| Klhl12        | chr1:134455530-134491018  | 6.5091   | 5.5080   | -0.2409 | 0.110904 |
| Slc2a8        | chr2:32972989-32982083    | 2.3804   | 3.5375   | 0.5716  | 0.150666 |
| Mef2d         | chr3:88142371-88172086    | 12.9382  | 10.8372  | -0.2557 | 0.316827 |
| Casp6         | chr3:129901424-129914103  | 6.4423   | 9.1923   | 0.5129  | 0.157622 |
| Ccdc109b      | chr3:129914959-129970206  | 13.4384  | 17.1010  | 0.3477  | 0.079319 |
| Gem           | chr4:11704456-11714752    | 1.9186   | 3.1093   | 0.6965  | 0.195849 |
| Foxd2os       | chr4:114909256-114921967  | 1.8878   | 2.7524   | 0.5440  | 0.073287 |
| Prdx1         | chr4:116685543-116700822  | 32.5853  | 40.8800  | 0.3272  | 0.333965 |
| Gnl2          | chr4:125016584-125055380  | 27.8688  | 24.2574  | -0.2002 | 0.216799 |
| Psd3          | chr8:67689081-68062286    | 0.2115   | 0.0890   | -1.2493 | 0.222063 |
| Atp5l         | chr9:44913249-44920742    | 4.1414   | 1.2158   | -1.7683 | 0.302293 |
| Gm7666        | chr15:6653922-6654741     | 0.8344   | 2.6595   | 1.6724  | 0.086510 |
| Gm26883       | chr2:169633645-169888503  | 0.4632   | 1.0776   | 1.2181  | 0.281299 |
| Gm5148        | chr3:37714189-37724490    | 0.1330   | 0.4207   | 1.6617  | 0.087849 |
| Thtpa         | chr14:55094834-55098986   | 11.2763  | 13.7023  | 0.2811  | 0.064293 |
| Cpa3          | chr3:20215616-20242181    | 0.8277   | 0.2571   | -1.6870 | 0.095594 |
| Usb1          | chr8:95332291-95347507    | 10.8838  | 13.1889  | 0.2771  | 0.035624 |
| Nsfl1c        | chr2:151494181-151511414  | 15.0666  | 12.1457  | -0.3109 | 0.388376 |
| Col5a3        | chr9:20770049-20815067    | 0.0361   | 0.1568   | 2.1185  | 0.168313 |

|               |                           |          |          |         |          |
|---------------|---------------------------|----------|----------|---------|----------|
| 1700021F05Rik | chr10:43525120-43540994   | 4.4808   | 7.0292   | 0.6496  | 0.172106 |
| Ddx39b        | chr17:35241745-35253707   | 99.2610  | 90.0213  | -0.1410 | 0.212641 |
| B230398E01Rik | chr3:94959033-94962048    | 11.3569  | 14.3428  | 0.3368  | 0.102120 |
| Bhlha15       | chr5:144190285-144194441  | 1.0797   | 0.6048   | -0.8361 | 0.163547 |
| Ms4a6c        | chr19:11469367-11482197   | 44.3856  | 37.5471  | -0.2414 | 0.318238 |
| Scarna6       | chr1:87784555-87784820    | 63.1092  | 90.3780  | 0.5181  | 0.356826 |
| Zfp821        | chr8:109705548-109724932  | 8.9914   | 6.9958   | -0.3621 | 0.160420 |
| Zfhx2         | chr14:55060261-55092324   | 1.6998   | 1.2161   | -0.4831 | 0.364250 |
| Sqstm1        | chr11:50199365-50210827   | 59.2517  | 66.7206  | 0.1713  | 0.071227 |
| Ifit1         | chr19:34640870-34650009   | 20.9195  | 31.8840  | 0.6080  | 0.233650 |
| 2610024D14Rik | chr11:21099533-21099827   | 21.5441  | 13.9214  | -0.6300 | 0.073190 |
| Uimc1         | chr13:55027879-55100300   | 17.0779  | 20.2382  | 0.2449  | 0.210245 |
| Hn1l          | chr17:24942155-24960636   | 15.5082  | 12.2393  | -0.3415 | 0.422957 |
| Slc29a2       | chr19:5024005-5031971     | 2.0372   | 1.0987   | -0.8907 | 0.326999 |
| Nxf1          | chr19:8757102-8770909     | 84.5281  | 76.7397  | -0.1395 | 0.052220 |
| Tor3a         | chr1:156653616-156674356  | 7.2995   | 9.4937   | 0.3792  | 0.260783 |
| Chmp4b        | chr2:154651704-154694785  | 91.2785  | 103.1788 | 0.1768  | 0.090607 |
| Nfatc2        | chr2:168476409-168601657  | 5.2381   | 4.1783   | -0.3261 | 0.388959 |
| Gm2076        | chr13:93293780-93294751   | 1.4659   | 0.3793   | -1.9502 | 0.203619 |
| Gm26847       | chr10:128230589-128232790 | 0.6869   | 1.5601   | 1.1835  | 0.224814 |
| Rmdn1         | chr4:19575161-19606932    | 3.9128   | 5.8085   | 0.5700  | 0.194078 |
| Cdc45         | chr16:18780446-18811987   | 12.5944  | 15.4793  | 0.2976  | 0.096309 |
| Plekha1       | chr7:130865755-130913312  | 10.3408  | 9.0189   | -0.1973 | 0.150456 |
| Rps13-ps4     | chr8:119602169-119602625  | 3.5962   | 1.1411   | -1.6561 | 0.335958 |
| Acot6         | chr12:84100653-84111349   | 1.0126   | 2.0846   | 1.0417  | 0.109306 |
| Map3k15       | chrX:159988432-160123351  | 10.2588  | 13.0396  | 0.3460  | 0.272048 |
| Olf755-ps1    | chr17:37276647-37278105   | 5.6545   | 3.3237   | -0.7666 | 0.209787 |
| Fam107b       | chr2:3613757-3782142      | 169.5186 | 193.3871 | 0.1900  | 0.230465 |
| Gm25848       | chr16:32243711-32243855   | 2.2243   | 8.6086   | 1.9524  | 0.087218 |
| Gm14176       | chr2:157901468-157902522  | 0.2293   | 0.8727   | 1.9285  | 0.032138 |
| Tubb4b        | chr2:25222159-25224702    | 46.4688  | 54.9650  | 0.2423  | 0.207564 |
| Gm17228       | chr17:63346919-63347410   | 0.5145   | 1.8599   | 1.8541  | 0.054688 |
| Chrna2        | chr14:66140959-66152948   | 0.7120   | 1.2390   | 0.7993  | 0.143062 |
| Tada1         | chr1:166379096-166393621  | 10.5507  | 12.5619  | 0.2517  | 0.079715 |
| Tom11l        | chr11:90643464-90688366   | 1.5593   | 2.1005   | 0.4298  | 0.130921 |
| Hdgfrp3       | chr7:81881250-81934473    | 8.9014   | 7.8474   | -0.1818 | 0.121477 |
| Cdipt         | chr7:126976348-126980499  | 78.0918  | 91.0584  | 0.2216  | 0.237314 |
| Abhd8         | chr8:71456699-71463657    | 37.3861  | 45.2097  | 0.2741  | 0.294749 |
| Ranbp10       | chr8:105768307-105827350  | 11.4389  | 9.6873   | -0.2398 | 0.275704 |
| Naa30         | chr14:49172225-49191031   | 17.6860  | 15.8071  | -0.1620 | 0.106189 |
| Notch4        | chr17:34564267-34588503   | 1.2292   | 0.8421   | -0.5456 | 0.266961 |
| Tmem64        | chr4:15265830-15286753    | 37.1982  | 33.0030  | -0.1726 | 0.205983 |
| Rngtt         | chr4:33310310-33502614    | 11.8423  | 10.2746  | -0.2049 | 0.215744 |
| Ccdc67        | chr9:15559863-15627933    | 0.8365   | 0.3445   | -1.2797 | 0.265540 |
| Dmrta2        | chr4:109978052-109983687  | 0.0513   | 0.3396   | 2.7281  | 0.404578 |
| Ccm2          | chr11:6546886-6596744     | 53.5495  | 47.7781  | -0.1645 | 0.257857 |
| Rhbdl3        | chr11:80300911-80355955   | 0.3109   | 0.6317   | 1.0226  | 0.220972 |
| Tmem14c       | chr13:41016249-41022575   | 41.0650  | 50.1699  | 0.2889  | 0.159833 |
| Trappc13      | chr13:104142148-104178469 | 10.1794  | 12.2802  | 0.2707  | 0.204839 |
| Smco3         | chr6:136829926-136835452  | 0.6806   | 0.1339   | -2.3463 | 0.383170 |
| Vasp          | chr7:19256928-19271817    | 153.1523 | 172.3012 | 0.1700  | 0.157395 |
| Gm26646       | chr7:79916951-79920606    | 2.0845   | 3.4983   | 0.7470  | 0.173373 |
| Arhgef7       | chr8:11728104-11835219    | 5.3419   | 4.6597   | -0.1971 | 0.092469 |
| Lzts1         | chr8:69135502-69140953    | 1.1565   | 2.1301   | 0.8812  | 0.193281 |
| Tmem221       | chr8:71554302-71558871    | 1.3376   | 2.4359   | 0.8648  | 0.087798 |
| Gcsh          | chr8:116981809-116993537  | 17.2373  | 12.8465  | -0.4242 | 0.371508 |
| Pcyt1b        | chrX:93654862-93749951    | 1.2325   | 1.8656   | 0.5981  | 0.161602 |
| Tmem184b      | chr15:79360683-79403303   | 6.4646   | 4.9143   | -0.3956 | 0.332562 |
| Spats2        | chr15:99126577-99213206   | 0.5598   | 0.1800   | -1.6367 | 0.283135 |
| Abcg1         | chr17:31057697-31115777   | 37.7102  | 33.5028  | -0.1707 | 0.241501 |
| Zfp799        | chr17:32815454-32822200   | 5.3296   | 6.5859   | 0.3054  | 0.155543 |
| Dtx3l         | chr16:35926510-35939151   | 45.7263  | 51.6083  | 0.1746  | 0.118641 |
| Gm25894       | chr19:8724250-8724325     | 45.1557  | 80.0080  | 0.8252  | 0.243157 |
| Hnrnpul2      | chr19:8819400-8834142     | 27.0070  | 23.8025  | -0.1822 | 0.259420 |
| Med22         | chr2:26905261-26910677    | 19.3520  | 16.9214  | -0.1936 | 0.083133 |
| Setx          | chr2:29124180-29182471    | 76.2892  | 69.7600  | -0.1291 | 0.166174 |
| Gm13436       | chr2:36807807-36808425    | 55.4489  | 71.0703  | 0.3581  | 0.305827 |
| Capn3         | chr2:120456018-120504913  | 7.5599   | 6.2048   | -0.2850 | 0.257781 |
| Gm9889        | chr3:115715149-115716727  | 1.6806   | 2.9373   | 0.8055  | 0.156816 |
| Dvl1          | chr4:155847401-155859303  | 18.2395  | 16.1506  | -0.1755 | 0.101026 |
| Gm16125       | chr13:74340538-74340877   | 2.0005   | 5.2910   | 1.4032  | 0.047431 |

|               |                           |          |           |         |          |
|---------------|---------------------------|----------|-----------|---------|----------|
| Henmt1        | chr3:108940083-108960773  | 0.3957   | 0.8633    | 1.1253  | 0.189755 |
| Cep290        | chr10:100488288-100573655 | 2.3428   | 3.0240    | 0.3682  | 0.172639 |
| Gm26772       | chr14:25548389-25554369   | 1.1907   | 0.6474    | -0.8791 | 0.216455 |
| Polr3b        | chr10:84622436-84727177   | 19.0982  | 16.8713   | -0.1789 | 0.129403 |
| Dpy19l1       | chr9:24411775-24503140    | 9.4576   | 8.2351    | -0.1997 | 0.079579 |
| Dag1          | chr9:108205954-108263924  | 5.0961   | 3.9917    | -0.3524 | 0.247076 |
| Gm7535        | chr17:17911038-17911947   | 2.6663   | 1.2797    | -1.0591 | 0.139278 |
| Eef1g         | chr19:8967040-8978479     | 49.2997  | 42.0813   | -0.2284 | 0.403169 |
| Mrps21        | chr3:95862633-95871519    | 13.3903  | 18.1227   | 0.4366  | 0.225594 |
| Ccdc136       | chr6:29396308-29426994    | 0.0846   | 0.3109    | 1.8784  | 0.082926 |
| Sirt6         | chr10:81621784-81627797   | 8.8696   | 6.8035    | -0.3826 | 0.282667 |
| Ube3c         | chr5:29569241-29676077    | 24.0681  | 21.5516   | -0.1593 | 0.049853 |
| Usf2          | chr7:30945251-30956803    | 22.7222  | 19.4709   | -0.2228 | 0.167031 |
| Ccdc101       | chr7:126649308-126672925  | 10.3995  | 13.1861   | 0.3425  | 0.079170 |
| Ddx60         | chr8:61928086-62037701    | 12.7127  | 15.5132   | 0.2872  | 0.312542 |
| Tmem181a      | chr17:6270474-6305783     | 5.4416   | 3.7651    | -0.5313 | 0.204948 |
| Kif18a        | chr2:109280737-109341747  | 2.6601   | 3.3079    | 0.3144  | 0.134637 |
| Nceh1         | chr3:27182964-27284608    | 6.3466   | 7.7507    | 0.2883  | 0.127215 |
| Gm21182       | chr8:20556694-20557333    | 0.4011   | 1.6446    | 2.0357  | 0.123616 |
| Vwa5b2        | chr16:20589470-20605377   | 0.0871   | 0.2555    | 1.5528  | 0.211883 |
| Mir1894       | chr17:35917888-35917969   | 74.9028  | 110.9046  | 0.5662  | 0.189287 |
| Rad54l        | chr4:116094263-116123690  | 4.0423   | 4.9021    | 0.2782  | 0.082711 |
| Mapkapk2      | chr1:131053703-131097543  | 59.5446  | 68.6959   | 0.2063  | 0.219365 |
| Mtmt1         | chrX:71364759-71419196    | 14.7833  | 17.2673   | 0.2241  | 0.160503 |
| Plin5         | chr17:56111600-56117596   | 0.7135   | 0.2132    | -1.7429 | 0.172699 |
| Tasp1         | chr2:139833479-140066805  | 25.0063  | 22.0431   | -0.1820 | 0.102291 |
| Tssk6         | chr8:69902183-69903516    | 5.4084   | 3.3240    | -0.7023 | 0.244979 |
| Gm16083       | chr1:130462575-130557075  | 0.5699   | 1.0978    | 0.9459  | 0.221493 |
| Fryl          | chr5:73020321-73256618    | 40.0379  | 34.6861   | -0.2070 | 0.458595 |
| Ttil3         | chr6:113389259-113414583  | 14.1224  | 12.0469   | -0.2293 | 0.274078 |
| Rpl35         | chr2:39001579-39005624    | 19.6305  | 26.1218   | 0.4122  | 0.347821 |
| Fitm2         | chr2:163466378-163472629  | 3.1154   | 4.2034    | 0.4321  | 0.157888 |
| Plch2         | chr4:154983114-155056784  | 0.1747   | 0.0386    | -2.1798 | 0.182527 |
| Spaca1        | chr4:34024873-34050191    | 1.3073   | 0.4722    | -1.4693 | 0.194508 |
| Gdf11         | chr10:128882294-128891718 | 6.0779   | 7.8985    | 0.3780  | 0.265941 |
| Gm22442       | chr11:69350517-69350661   | 975.3524 | 1173.6078 | 0.2670  | 0.382726 |
| Sec23a        | chr12:58958382-59012017   | 13.6400  | 15.8637   | 0.2179  | 0.064938 |
| Slc4a2        | chr5:24423836-24440950    | 12.4162  | 10.8442   | -0.1953 | 0.140771 |
| Wbscr27       | chr5:134932367-134942637  | 2.4369   | 1.5564    | -0.6468 | 0.269141 |
| Gdpgp1        | chr7:80232866-80241006    | 5.4474   | 7.0606    | 0.3742  | 0.221101 |
| Pgrmc1        | chrX:36598205-36606079    | 25.0254  | 30.0485   | 0.2639  | 0.153856 |
| Enpp4         | chr17:44096307-44105809   | 5.7383   | 4.3551    | -0.3979 | 0.330260 |
| Vasn          | chr16:4639940-4650802     | 7.8425   | 5.8611    | -0.4201 | 0.354497 |
| Hspd1         | chr1:55077834-55088243    | 59.2311  | 48.7542   | -0.2808 | 0.447812 |
| Mtg2          | chr2:180070587-180085902  | 7.8780   | 6.7493    | -0.2231 | 0.087896 |
| 1110037F02Rik | chr4:11485957-11550684    | 36.2206  | 40.8691   | 0.1742  | 0.111667 |
| Hpn           | chr7:31098724-31115290    | 0.9895   | 2.0278    | 1.0352  | 0.113698 |
| Szt2          | chr4:118362742-118409273  | 9.1457   | 7.6734    | -0.2532 | 0.389232 |
| Mcts2         | chr2:152687147-152687940  | 15.7505  | 10.8818   | -0.5335 | 0.260307 |
| Nab2          | chr10:127660917-127668568 | 30.9129  | 26.7881   | -0.2066 | 0.266623 |
| Gm11714       | chr11:107428275-107435686 | 3.0863   | 5.4845    | 0.8295  | 0.279916 |
| Nsd1          | chr13:55209781-55318325   | 50.0937  | 45.1593   | -0.1496 | 0.287408 |
| Gm15829       | chr16:33966238-33967312   | 10.2929  | 5.9828    | -0.7827 | 0.257567 |
| Ubald2        | chr11:116434093-116439077 | 4.7801   | 3.2104    | -0.5743 | 0.094009 |
| Gm25596       | chr10:29349584-29349691   | 21.8385  | 8.4405    | -1.3715 | 0.134153 |
| Icosl         | chr10:78069359-78079525   | 4.9885   | 3.7987    | -0.3931 | 0.067975 |
| Pus7          | chr5:23740647-23783711    | 11.2680  | 9.4086    | -0.2602 | 0.312222 |
| Fam184b       | chr5:45529705-45639501    | 0.4552   | 0.1524    | -1.5792 | 0.254413 |
| E130309D02Rik | chr5:143301194-143315360  | 7.4450   | 6.0485    | -0.2997 | 0.241384 |
| Kif22         | chr7:127027731-127042420  | 15.6228  | 19.5408   | 0.3228  | 0.232094 |
| Mcmbp         | chr7:128696440-128740495  | 37.3048  | 33.4181   | -0.1587 | 0.186038 |
| Polb          | chr8:22628118-22653437    | 18.5209  | 23.5523   | 0.3467  | 0.180692 |
| Ubash3a       | chr17:31207872-31242202   | 69.9498  | 62.6803   | -0.1583 | 0.250805 |
| Dnajc28       | chr16:91614256-91619026   | 1.9425   | 1.1763    | -0.7236 | 0.375366 |
| Spopl         | chr2:23506219-23572106    | 11.1662  | 9.5444    | -0.2264 | 0.271162 |
| Gm14198       | chr2:154630001-154632636  | 1.6831   | 0.4504    | -1.9017 | 0.271692 |
| Prss12        | chr3:123446912-123506602  | 1.2824   | 2.3364    | 0.8654  | 0.242890 |
| Nfia          | chr4:97772733-98118874    | 0.5090   | 0.8160    | 0.6808  | 0.259161 |
| 4930483K19Rik | chr10:76545870-76562226   | 1.1705   | 2.2953    | 0.9716  | 0.036605 |
| Pgam1         | chr19:41911870-41918664   | 1.8513   | 3.4454    | 0.8962  | 0.238938 |
| Sell          | chr1:164062075-164080785  | 319.2554 | 282.9061  | -0.1744 | 0.367889 |

|           |                           |          |          |         |          |
|-----------|---------------------------|----------|----------|---------|----------|
| Slc2a1    | chr4:119108710-119137330  | 14.7832  | 12.5752  | -0.2334 | 0.098979 |
| Csnk1d    | chr11:120961748-120991330 | 37.0888  | 33.0718  | -0.1654 | 0.260130 |
| Mir27b    | chr13:63300699-63300796   | 48.7279  | 28.7520  | -0.7611 | 0.280921 |
| Rasal1    | chr5:120648811-120679597  | 13.8808  | 11.3702  | -0.2878 | 0.343033 |
| Snrpg     | chr6:86371582-86378902    | 35.1686  | 52.4354  | 0.5763  | 0.259125 |
| Setd5     | chr6:113077364-113153435  | 22.8580  | 20.0736  | -0.1874 | 0.370121 |
| Slc25a15  | chr8:22375553-22398621    | 4.8944   | 3.6660   | -0.4169 | 0.260740 |
| Tex15     | chr8:33516737-33585582    | 2.1214   | 1.5094   | -0.4910 | 0.411106 |
| Tirap     | chr9:35184550-35200291    | 0.9508   | 1.4722   | 0.6307  | 0.191119 |
| Mtcp1     | chrX:75404845-75416584    | 6.4226   | 8.6556   | 0.4305  | 0.017297 |
| Baiap3    | chr17:25242658-25256364   | 6.2507   | 8.2986   | 0.4089  | 0.364795 |
| Wdr74     | chr19:8735838-8740623     | 38.5134  | 33.0618  | -0.2202 | 0.081529 |
| Mbp       | chr18:82475145-82585637   | 28.1524  | 25.0287  | -0.1697 | 0.311457 |
| Ppp2r4    | chr2:30416038-30447806    | 22.1855  | 25.2788  | 0.1883  | 0.082302 |
| Gbp2      | chr3:142620601-142638008  | 87.9864  | 100.0634 | 0.1856  | 0.166677 |
| Dio2      | chr12:90724553-90738438   | 0.1160   | 0.3300   | 1.5083  | 0.110703 |
| Med24     | chr11:98704590-98729435   | 14.1675  | 12.3259  | -0.2009 | 0.268766 |
| Ptprj     | chr2:90429753-90580647    | 8.5855   | 10.6728  | 0.3140  | 0.311891 |
| Furin     | chr7:80388584-80405436    | 6.2976   | 5.2032   | -0.2754 | 0.332820 |
| Arl13b    | chr16:62793684-62847040   | 4.0076   | 5.0619   | 0.3369  | 0.094995 |
| Prim2     | chr1:33453810-33669786    | 14.1640  | 17.6917  | 0.3208  | 0.206797 |
| Sit1      | chr4:43482080-43483734    | 35.4122  | 41.8373  | 0.2405  | 0.046208 |
| Akna      | chr4:63367124-63403354    | 84.7679  | 72.4619  | -0.2262 | 0.441903 |
| Cpsf6     | chr10:117344672-117380015 | 30.3343  | 27.4371  | -0.1448 | 0.221838 |
| Trip11    | chr12:101834042-101913267 | 20.9675  | 18.6031  | -0.1726 | 0.296609 |
| Etfb      | chr7:43444107-43457800    | 20.6709  | 26.8218  | 0.3758  | 0.218961 |
| Trim21    | chr7:102557921-102565469  | 43.8806  | 52.0802  | 0.2471  | 0.300227 |
| Kctd21    | chr7:97332326-97350213    | 0.4852   | 1.1115   | 1.1959  | 0.128269 |
| Gm15613   | chr5:32479559-32479885    | 9.7431   | 4.5693   | -1.0924 | 0.405682 |
| Trbv13-3  | chr6:41130146-41130585    | 77.9207  | 62.4207  | -0.3200 | 0.237960 |
| Fbxw9     | chr8:85060054-85067124    | 2.2018   | 1.4168   | -0.6361 | 0.206589 |
| Nup155    | chr15:8109312-8159857     | 18.1894  | 16.1988  | -0.1672 | 0.101167 |
| Rcan1     | chr16:92391952-92466146   | 3.5963   | 5.3128   | 0.5629  | 0.270460 |
| Zbtb18    | chr1:177444660-177450760  | 7.4671   | 6.2821   | -0.2493 | 0.159282 |
| Snrnp200  | chr2:127208385-127240451  | 64.4506  | 58.6559  | -0.1359 | 0.261975 |
| Zfp335    | chr2:164891881-164911757  | 20.4964  | 17.1728  | -0.2552 | 0.381935 |
| Traj56    | chr14:54159262-54159325   | 15.8018  | 4.3230   | -1.8700 | 0.192249 |
| Syng3     | chr17:24685091-24689955   | 0.1754   | 0.6409   | 1.8697  | 0.149589 |
| Gpr35     | chr1:92973118-92986391    | 0.1565   | 0.3833   | 1.2925  | 0.178991 |
| Znf512b   | chr2:181582102-181592803  | 12.9642  | 11.3904  | -0.1867 | 0.169802 |
| Rhpn2     | chr7:35334174-35392285    | 1.1217   | 0.6411   | -0.8070 | 0.269252 |
| Pno1      | chr11:17203197-17211568   | 23.6994  | 19.0528  | -0.3148 | 0.398138 |
| Engase    | chr11:118476828-118489209 | 2.2115   | 1.6339   | -0.4367 | 0.089210 |
| Trim68    | chr7:102677579-102687326  | 6.1547   | 7.9909   | 0.3767  | 0.143027 |
| Gemin8    | chrX:166170453-166190512  | 2.3872   | 3.5394   | 0.5682  | 0.156552 |
| Atp5g2    | chr15:102663013-102667749 | 6.3994   | 3.1173   | -1.0376 | 0.287527 |
| Kctd18    | chr1:57955100-58018956    | 7.3813   | 8.4842   | 0.2009  | 0.077438 |
| Ino80     | chr2:119373041-119477687  | 17.7949  | 15.8672  | -0.1654 | 0.113135 |
| Mrpl48-ps | chr4:88599174-88599810    | 1.0889   | 2.8867   | 1.4065  | 0.180266 |
| Chml      | chr1:175686487-175688353  | 7.1607   | 5.3376   | -0.4239 | 0.173872 |
| Ttc39c    | chr18:12599925-12737050   | 8.2917   | 10.6212  | 0.3572  | 0.307170 |
| Gm5421    | chr10:22343438-22345792   | 1.7539   | 2.8739   | 0.7124  | 0.198765 |
| Ly6e      | chr15:74955050-74959905   | 210.2623 | 242.6562 | 0.2067  | 0.323025 |
| Ephx1     | chr1:180976154-181020904  | 87.5017  | 99.5744  | 0.1865  | 0.149417 |
| Pds5a     | chr5:65615259-65697856    | 87.4563  | 79.2575  | -0.1420 | 0.217795 |
| Lpar2     | chr8:69822428-69831102    | 0.9984   | 1.4372   | 0.5255  | 0.058994 |
| Zfp212    | chr6:47920475-47932639    | 7.4643   | 9.1861   | 0.2994  | 0.058078 |
| Rab27a    | chr9:73044864-73097592    | 50.1221  | 56.3526  | 0.1690  | 0.029288 |
| Ikbg      | chrX:74393289-74453854    | 12.0210  | 14.1406  | 0.2343  | 0.209619 |
| Topors    | chr4:40259600-40269850    | 25.4904  | 29.3289  | 0.2024  | 0.101705 |
| Clic5     | chr17:44188571-44280168   | 0.0401   | 0.1723   | 2.1027  | 0.178169 |
| Dcp1a     | chr14:30479564-30527056   | 15.5125  | 13.8083  | -0.1679 | 0.056577 |
| Spag4     | chr2:156065174-156070617  | 0.6140   | 0.2507   | -1.2921 | 0.205101 |
| Leo1      | chr9:75441523-75466432    | 21.7497  | 18.4192  | -0.2398 | 0.214572 |
| Mrps24    | chr11:5703982-5715680     | 19.7666  | 25.7351  | 0.3807  | 0.277579 |
| Rab5c     | chr11:100715008-100738215 | 69.9076  | 80.3648  | 0.2011  | 0.197981 |
| Atxn7l1   | chr12:33147692-33375659   | 6.1988   | 5.0075   | -0.3079 | 0.446581 |
| Ahsa1     | chr12:87266745-87273997   | 110.3525 | 94.4979  | -0.2238 | 0.405265 |
| Gimap4    | chr6:48684548-48692060    | 787.4388 | 873.8897 | 0.1503  | 0.104854 |
| Chchd4    | chr6:91464275-91473423    | 17.9189  | 14.0696  | -0.3489 | 0.224141 |
| Klhl42    | chr6:147091378-147112778  | 14.5916  | 12.9429  | -0.1730 | 0.115270 |

|               |                          |          |          |         |          |
|---------------|--------------------------|----------|----------|---------|----------|
| Ap3s2         | chr7:79875331-79920640   | 5.2078   | 6.2965   | 0.2739  | 0.062575 |
| Ngrn          | chr7:80261214-80265374   | 22.1083  | 18.6989  | -0.2416 | 0.080923 |
| Tomt          | chr7:101898372-101906359 | 4.0902   | 5.4832   | 0.4229  | 0.104826 |
| Nucb2         | chr7:116504368-116540554 | 5.0218   | 6.7522   | 0.4272  | 0.191916 |
| Nek1          | chr8:60993194-61131346   | 3.5500   | 2.8812   | -0.3011 | 0.189866 |
| Cd97          | chr8:83723250-83741326   | 160.6941 | 146.5805 | -0.1326 | 0.250662 |
| Usp4          | chr9:108347830-108392529 | 53.5385  | 48.5982  | -0.1397 | 0.119077 |
| Pfkfb4        | chr9:108991901-109032223 | 1.3655   | 2.0121   | 0.5593  | 0.106802 |
| Wtap          | chr17:12966795-12992546  | 21.7506  | 19.4434  | -0.1618 | 0.109868 |
| Zfp945        | chr17:22846696-22867134  | 6.9499   | 8.6924   | 0.3228  | 0.330938 |
| Gm16712       | chr17:55954770-55959381  | 2.0176   | 3.1852   | 0.6587  | 0.092160 |
| Lzts2         | chr19:45015175-45027104  | 1.8663   | 2.7421   | 0.5551  | 0.147227 |
| Akt3          | chr1:177020072-177258203 | 15.2874  | 18.2576  | 0.2562  | 0.235880 |
| Nr6a1         | chr2:38723369-38927688   | 0.6690   | 1.0300   | 0.6225  | 0.188663 |
| Gm14239       | chr2:155459500-155460892 | 4.7352   | 2.5288   | -0.9050 | 0.164601 |
| Trim33        | chr3:103279292-103358768 | 18.9422  | 16.8540  | -0.1685 | 0.230908 |
| Otud6b        | chr4:14809497-14826587   | 11.3882  | 9.0515   | -0.3313 | 0.275392 |
| D630039A03Rik | chr4:57908482-57916297   | 5.1871   | 7.7742   | 0.5838  | 0.380680 |
| Samd11        | chr4:156246972-156255338 | 22.1799  | 19.0368  | -0.2205 | 0.207310 |
| Kdm4d         | chr9:14462547-14500482   | 0.1344   | 0.5107   | 1.9256  | 0.186971 |
| Rapgef3       | chr15:97744769-97767972  | 0.0694   | 0.2172   | 1.6470  | 0.148999 |
| Anxa1         | chr19:20373427-20390944  | 1.3896   | 2.5139   | 0.8553  | 0.256008 |
| Marcks        | chr10:37133374-37138920  | 1.3963   | 2.0305   | 0.5402  | 0.067355 |
| Smpd2         | chr10:41485641-41490369  | 13.3001  | 15.5171  | 0.2224  | 0.099920 |
| Gm26765       | chr10:91149514-91150594  | 37.5864  | 46.6160  | 0.3106  | 0.184223 |
| Rab1          | chr11:20201431-20226856  | 20.2954  | 23.9682  | 0.2400  | 0.216547 |
| Dnaaf2        | chr12:69189086-69198429  | 6.9141   | 8.8614   | 0.3580  | 0.230187 |
| Arg2          | chr12:79130776-79156301  | 0.9800   | 2.0331   | 1.0528  | 0.311592 |
| 9230114K14Rik | chr5:52190680-52197984   | 1.1875   | 0.4567   | -1.3784 | 0.230222 |
| Impdh1        | chr6:29200433-29216364   | 17.8924  | 14.4465  | -0.3086 | 0.413722 |
| Hdac11        | chr6:91156664-91174692   | 0.3941   | 0.7170   | 0.8633  | 0.047690 |
| Csgalnact1    | chr8:68356780-68735146   | 0.6740   | 1.1212   | 0.7343  | 0.224563 |
| Vps13c        | chr9:67840395-67995634   | 18.3714  | 15.5289  | -0.2425 | 0.460888 |
| Dync1li1      | chr9:114688789-114724302 | 35.7823  | 40.8677  | 0.1917  | 0.046806 |
| Foxp3         | chrX:7579675-7595243     | 35.7549  | 30.6503  | -0.2222 | 0.428160 |
| Prps2         | chrX:167346321-167382749 | 32.5125  | 38.5070  | 0.2441  | 0.281759 |
| Tmem186       | chr16:8633883-8637712    | 10.9135  | 13.4368  | 0.3001  | 0.147392 |
| Fbxo40        | chr16:36963459-36990467  | 1.3088   | 0.8993   | -0.5414 | 0.122884 |
| Zbtb21        | chr16:97947434-97962621  | 5.5518   | 6.6948   | 0.2701  | 0.095233 |
| Map3k11       | chr19:5689130-5702862    | 23.1202  | 19.4204  | -0.2516 | 0.389807 |
| March5        | chr19:37207542-37222139  | 18.0518  | 21.2588  | 0.2359  | 0.033225 |
| Cd46          | chr1:195041284-195092248 | 3.1646   | 2.1567   | -0.5532 | 0.237284 |
| Phf20         | chr2:156196465-156309952 | 5.8902   | 5.1786   | -0.1857 | 0.009797 |
| Mmp9          | chr2:164940779-164955850 | 1.4248   | 2.3600   | 0.7281  | 0.257763 |
| Erp44         | chr4:48193322-48279558   | 20.8932  | 18.1093  | -0.2063 | 0.247995 |
| Ppp1r8        | chr4:132826928-132843169 | 25.5272  | 29.7271  | 0.2197  | 0.131313 |
| Gm20506       | chr17:34249056-34250264  | 1.7628   | 0.4287   | -2.0397 | 0.172779 |
| D130043K22Rik | chr13:24845134-24901270  | 0.1719   | 0.4282   | 1.3168  | 0.095017 |
| Ppp2r5b       | chr19:6227764-6235872    | 4.3010   | 5.8079   | 0.4334  | 0.214990 |
| 9930021J03Rik | chr19:29714401-29806009  | 8.5747   | 7.4562   | -0.2016 | 0.198791 |
| Cd5           | chr19:10718142-10738974  | 251.1664 | 280.5156 | 0.1594  | 0.160552 |
| Vps37a        | chr8:40511782-40551134   | 15.2145  | 13.2941  | -0.1947 | 0.264322 |
| Rab14         | chr2:35180204-35201120   | 28.2193  | 24.9030  | -0.1804 | 0.283656 |
| Ranbp9        | chr13:43402672-43480973  | 43.8355  | 39.4286  | -0.1529 | 0.110928 |
| Acaca         | chr11:84129671-84401651  | 4.6925   | 3.8771   | -0.2754 | 0.316759 |
| Sec61b        | chr4:47474657-47483242   | 22.2389  | 29.2744  | 0.3966  | 0.289276 |
| Gm5805        | chr15:81972389-81972845  | 4.9235   | 9.7954   | 0.9924  | 0.131550 |
| Gm25951       | chr4:140717042-140717106 | 100.0858 | 62.2800  | -0.6844 | 0.219540 |
| B230322F03Rik | chr7:35555366-35556935   | 1.5367   | 2.6000   | 0.7587  | 0.119065 |
| Mlh1          | chr9:111228227-111271608 | 13.0633  | 11.3032  | -0.2088 | 0.148546 |
| Ddx31         | chr2:28840405-28905571   | 13.3421  | 11.4747  | -0.2175 | 0.106714 |
| Hcn3          | chr3:89146073-89160196   | 1.0080   | 0.5867   | -0.7808 | 0.147277 |
| Ppp6r2        | chr15:89253034-89286261  | 22.5799  | 26.6053  | 0.2367  | 0.194152 |
| Cdkn2aip      | chr8:47709343-47713931   | 13.5522  | 16.3771  | 0.2731  | 0.207106 |
| Mthfd1l       | chr10:3973117-4167081    | 30.5652  | 27.2202  | -0.1672 | 0.228425 |
| Hivep2        | chr10:13966378-14151376  | 33.8423  | 30.7347  | -0.1390 | 0.221962 |
| Parpbp        | chr10:88091431-88146941  | 3.3194   | 4.4870   | 0.4348  | 0.171349 |
| Zmiz2         | chr11:6389073-6406158    | 12.4525  | 10.2464  | -0.2813 | 0.370274 |
| Commd1        | chr11:22834743-22982382  | 29.6141  | 33.0610  | 0.1588  | 0.046520 |
| Grap          | chr11:61653264-61672784  | 108.0632 | 121.2549 | 0.1662  | 0.097817 |
| Gpr22         | chr12:31706866-31713947  | 0.9855   | 1.6168   | 0.7142  | 0.295088 |



|               |                           |          |          |         |          |
|---------------|---------------------------|----------|----------|---------|----------|
| Arhgap5       | chr12:52516076-52567852   | 11.4295  | 13.7434  | 0.2660  | 0.233444 |
| Klh28         | chr12:64942439-64965536   | 16.5324  | 14.3867  | -0.2006 | 0.013223 |
| Zfp738        | chr13:67667436-67687071   | 7.4434   | 6.3064   | -0.2391 | 0.105880 |
| Cdk6          | chr5:3343892-3523218      | 20.3161  | 17.1823  | -0.2417 | 0.326471 |
| Corin         | chr5:72300024-72504473    | 0.4287   | 0.1798   | -1.2541 | 0.243968 |
| Cdk2ap1       | chr5:124345416-124354671  | 3.1957   | 2.0223   | -0.6601 | 0.141564 |
| Gm15350       | chr8:12828334-12833865    | 11.0197  | 6.5857   | -0.7427 | 0.326984 |
| Snx20         | chr8:88626827-88636128    | 32.9626  | 39.2970  | 0.2536  | 0.172941 |
| Chtf8         | chr8:106883862-106893601  | 58.0330  | 51.8240  | -0.1633 | 0.247161 |
| Cox7a2        | chr9:79755240-79759853    | 62.2142  | 80.2023  | 0.3664  | 0.357703 |
| Fam212a       | chr9:107984226-107985879  | 5.6370   | 3.6546   | -0.6252 | 0.233218 |
| Cmc1          | chr9:118064528-118150196  | 12.1242  | 16.1688  | 0.4153  | 0.232440 |
| Traj6         | chr14:54212687-54212749   | 177.4227 | 131.8043 | -0.4288 | 0.070363 |
| Trim13        | chr14:61598225-61605946   | 5.1016   | 3.6717   | -0.4745 | 0.076714 |
| Ppp2r2a       | chr14:67014056-67072471   | 8.6472   | 7.0475   | -0.2951 | 0.276494 |
| Mir17hg       | chr14:115042878-115046727 | 19.4425  | 15.8214  | -0.2973 | 0.438658 |
| Gm10505       | chr17:27342459-27344825   | 7.1550   | 10.2974  | 0.5252  | 0.219353 |
| AI413582      | chr17:27563574-27565749   | 15.5711  | 19.5192  | 0.3260  | 0.154372 |
| Egfl8         | chr17:34613348-34615971   | 3.1181   | 1.9827   | -0.6532 | 0.135983 |
| Trim39        | chr17:36258872-36272247   | 16.1237  | 14.2453  | -0.1787 | 0.239876 |
| 2410015M20Rik | chr17:56607451-56609771   | 45.4835  | 58.4211  | 0.3611  | 0.331298 |
| Litaf         | chr16:10959274-11066157   | 17.6260  | 21.4536  | 0.2835  | 0.284631 |
| Cd200r3       | chr16:44943677-44981380   | 0.2780   | 0.5621   | 1.0157  | 0.330648 |
| 4932438H23Rik | chr16:91053934-91095122   | 0.4613   | 0.9055   | 0.9728  | 0.129456 |
| Gm21970       | chr16:91391720-91419451   | 53.3170  | 63.0341  | 0.2415  | 0.121827 |
| Gm17090       | chr1:91305091-91321101    | 9.1059   | 13.9403  | 0.6144  | 0.126451 |
| Yod1          | chr1:130717326-130722055  | 9.1224   | 7.6056   | -0.2623 | 0.190793 |
| Bpnt1         | chr1:185332148-185357777  | 6.6625   | 5.0962   | -0.3867 | 0.155107 |
| Mbd5          | chr2:48949509-49322284    | 3.5181   | 2.9019   | -0.2778 | 0.316840 |
| Mfap1b        | chr2:121460234-121474067  | 3.5565   | 4.8846   | 0.4578  | 0.213324 |
| Xkr8          | chr4:132724896-132732546  | 2.9840   | 2.2588   | -0.4017 | 0.095207 |
| Noc2l         | chr4:156236009-156247616  | 73.8120  | 66.6495  | -0.1473 | 0.231207 |
| Mir1982       | chr10:80828796-80828870   | 7.7352   | 20.7322  | 1.4224  | 0.054712 |
| Gm26943       | chr13:112884225-112885182 | 3.4171   | 1.3670   | -1.3218 | 0.345223 |
| Ncr1          | chr7:4337723-4345164      | 0.2497   | 0.8698   | 1.8005  | 0.059700 |
| Tenm1         | chrX:42527865-43429126    | 0.1542   | 0.3196   | 1.0517  | 0.161529 |
| Papss2        | chr19:32620004-32667187   | 0.3398   | 0.8411   | 1.3077  | 0.109018 |
| S100g         | chrX:162961991-162964599  | 0.3115   | 1.9222   | 2.6255  | 0.414181 |
| Nefh          | chr11:4938753-4948064     | 10.6956  | 8.7359   | -0.2920 | 0.327435 |
| Ctdnep1       | chr11:69981155-69990601   | 13.6507  | 16.6981  | 0.2907  | 0.135521 |
| Snx11         | chr11:96767554-96777559   | 14.7895  | 12.7290  | -0.2165 | 0.235911 |
| Gm20498       | chr12:81358859-81532905   | 11.6504  | 14.7707  | 0.3424  | 0.327578 |
| Simc1         | chr13:54503778-54551290   | 6.7565   | 5.5480   | -0.2843 | 0.294109 |
| Phb2          | chr6:124712335-124716950  | 55.1168  | 49.5424  | -0.1538 | 0.268531 |
| Ncapd2        | chr6:125168008-125191595  | 28.5040  | 33.3026  | 0.2245  | 0.263981 |
| Rsf1os2       | chr7:97650009-97696828    | 2.6294   | 1.9085   | -0.4623 | 0.163698 |
| Dkk3          | chr7:112116018-112159057  | 0.4355   | 0.1129   | -1.9476 | 0.173074 |
| Armcx3        | chrX:134756594-134761455  | 1.3243   | 0.7851   | -0.7542 | 0.191362 |
| Hdac7         | chr15:97792663-97844502   | 28.1092  | 24.3020  | -0.2100 | 0.371741 |
| Fam186b       | chr15:99271017-99287180   | 0.6678   | 0.2099   | -1.6698 | 0.232005 |
| Bloc1s2       | chr19:44139265-44146446   | 2.6274   | 5.4141   | 1.0431  | 0.089117 |
| 3300002I08Rik | chr2:150310934-150362765  | 2.3770   | 3.6445   | 0.6166  | 0.243897 |
| 1500002C15Rik | chr4:155732547-155734627  | 10.9735  | 14.0295  | 0.3544  | 0.228024 |
| AF357399      | chr7:28351507-28351632    | 13.5748  | 5.0221   | -1.4346 | 0.189413 |
| Ncbp1         | chr4:46138612-46172403    | 51.7992  | 46.7704  | -0.1473 | 0.157971 |
| Oprm1         | chr10:6758505-7038198     | 2.0284   | 1.4227   | -0.5117 | 0.408289 |
| Ccdc138       | chr10:58497969-58576242   | 1.0965   | 1.7580   | 0.6811  | 0.033843 |
| Cactin        | chr10:81321102-81326251   | 24.2936  | 20.7909  | -0.2246 | 0.280591 |
| Dohh          | chr10:81384427-81391560   | 10.9661  | 8.4254   | -0.3802 | 0.446957 |
| Tsfm          | chr10:127011571-127030840 | 7.8562   | 6.3590   | -0.3050 | 0.106967 |
| Myl6          | chr10:128490859-128493875 | 120.7205 | 139.2401 | 0.2059  | 0.124890 |
| Ccdc117       | chr11:5528886-5542187     | 20.9624  | 17.8657  | -0.2306 | 0.297533 |
| Purb          | chr11:6467598-6476076     | 46.9714  | 42.6685  | -0.1386 | 0.245937 |
| Gm11999       | chr11:11642202-11685400   | 3.3289   | 1.8092   | -0.8797 | 0.030174 |
| Wdr92         | chr11:17182106-17233796   | 21.3992  | 18.3531  | -0.2215 | 0.218116 |
| Hist3h2bb-ps  | chr11:58954047-58954512   | 15.4112  | 22.8308  | 0.5670  | 0.279023 |
| Sarm1         | chr11:78472329-78497754   | 0.1139   | 0.3026   | 1.4098  | 0.082085 |
| Tmem97        | chr11:78541816-78550777   | 9.5318   | 7.3015   | -0.3846 | 0.085993 |
| Dhx40         | chr11:86768845-86807696   | 20.7003  | 24.1096  | 0.2200  | 0.198744 |
| Rpl19         | chr11:98026709-98030492   | 9.3209   | 13.0598  | 0.4866  | 0.203553 |
| Lrrc45        | chr11:120713924-120721128 | 13.0943  | 11.1147  | -0.2365 | 0.196748 |

|               |                           |          |          |         |          |
|---------------|---------------------------|----------|----------|---------|----------|
| Fn3krp        | chr11:121421400-121431288 | 4.1756   | 5.8411   | 0.4842  | 0.191620 |
| Acp1          | chr12:30893325-30911612   | 8.3020   | 6.5297   | -0.3465 | 0.320523 |
| Hist1h2ad     | chr13:23574380-23574952   | 5.5294   | 9.8068   | 0.8267  | 0.268389 |
| Dek           | chr13:47084774-47106201   | 75.0401  | 85.9974  | 0.1966  | 0.258938 |
| Gadd45g       | chr13:51846677-51848468   | 6.1690   | 9.2799   | 0.5891  | 0.251744 |
| A830009L08Rik | chr13:91368987-91388085   | 0.7217   | 0.3330   | -1.1158 | 0.172403 |
| Arsb          | chr13:93771678-93943016   | 1.8397   | 2.7970   | 0.6044  | 0.216865 |
| Magi2         | chr5:19227045-20704798    | 0.6645   | 0.9864   | 0.5699  | 0.148594 |
| Oas1c         | chr5:120800193-120812514  | 12.5375  | 10.2130  | -0.2958 | 0.274199 |
| Foxk1         | chr5:142401496-142462014  | 12.4079  | 10.8319  | -0.1960 | 0.286126 |
| Ephb6         | chr6:41605481-41620509    | 18.2561  | 15.8625  | -0.2028 | 0.225726 |
| Brk1          | chr6:113604771-113616948  | 88.5479  | 105.2941 | 0.2499  | 0.281578 |
| Ing4          | chr6:125039759-125051499  | 13.6302  | 12.0643  | -0.1761 | 0.189960 |
| Six5          | chr7:19094593-19098549    | 0.7101   | 1.2558   | 0.8225  | 0.139030 |
| Gm15567       | chr7:27249262-27257932    | 3.6189   | 2.2318   | -0.6974 | 0.394752 |
| Klf13         | chr7:63886350-63938915    | 29.8836  | 26.6581  | -0.1648 | 0.293425 |
| Whamm         | chr7:81571291-81596836    | 9.7896   | 11.7918  | 0.2685  | 0.079087 |
| Relt          | chr7:100845847-100863446  | 11.2092  | 9.2587   | -0.2758 | 0.276297 |
| Lhpp          | chr7:132610637-132706420  | 1.2543   | 2.5371   | 0.1064  | 0.102298 |
| Tti2          | chr8:31150315-31164702    | 15.2486  | 13.0400  | -0.2257 | 0.350249 |
| Mak16         | chr8:31159467-31168724    | 72.6159  | 63.8588  | -0.1854 | 0.296911 |
| Gm26768       | chr8:34094547-34096149    | 9.4079   | 12.9118  | 0.4568  | 0.171048 |
| Armc6         | chr8:70220171-70234466    | 4.0305   | 3.0911   | -0.3828 | 0.119045 |
| Rbl2          | chr8:91070056-91123844    | 37.6551  | 42.2458  | 0.1660  | 0.109111 |
| Gm17709       | chr8:121972726-121973822  | 2.7383   | 1.2604   | -1.1194 | 0.418007 |
| Phldb1        | chr9:44686303-44735198    | 1.3366   | 0.8291   | -0.6889 | 0.407660 |
| Plxb1         | chr9:109095435-109119911  | 0.7010   | 0.9977   | 0.5092  | 0.178711 |
| Wdr48         | chr9:119894894-119926579  | 27.1303  | 31.4049  | 0.2111  | 0.193555 |
| Araf          | chrX:20797813-20860519    | 20.6339  | 18.2921  | -0.1738 | 0.256950 |
| Snord83b      | chr15:80078497-80078591   | 44.3297  | 26.5681  | -0.7386 | 0.184464 |
| Dennd6b       | chr15:89182216-89196474   | 6.5028   | 5.3732   | -0.2753 | 0.183936 |
| Zcchc24       | chr14:25711639-25768856   | 1.1757   | 0.7137   | -0.7201 | 0.118240 |
| Nedd8         | chr14:55662264-55671906   | 107.0957 | 129.2666 | 0.2714  | 0.293582 |
| Sap18         | chr14:57798179-57804980   | 5.8868   | 7.3799   | 0.3261  | 0.140789 |
| Rnaseh2b      | chr14:62292588-62372992   | 5.3644   | 6.6148   | 0.3023  | 0.168116 |
| Gpalpp1       | chr14:76086231-76110815   | 16.5489  | 19.3443  | 0.2252  | 0.225499 |
| Klf12         | chr14:99874485-100149764  | 0.8114   | 0.2889   | -1.4898 | 0.081330 |
| 3300005D01Rik | chr17:5798656-5803240     | 1.4886   | 0.6983   | -1.0920 | 0.151969 |
| Tsr3          | chr17:25240169-25242798   | 20.9838  | 25.7177  | 0.2935  | 0.091633 |
| Gm26693       | chr17:32810143-32821697   | 3.7330   | 5.9279   | 0.6672  | 0.103444 |
| Pram1         | chr17:33638055-33645706   | 0.8924   | 1.6349   | 0.8734  | 0.254995 |
| Gm8909        | chr17:36164442-36168537   | 1.0912   | 1.9715   | 0.8533  | 0.098247 |
| Cript         | chr17:87025549-87035810   | 13.7014  | 17.2468  | 0.3320  | 0.170763 |
| Gm15564       | chr16:35966751-35983230   | 137.1303 | 56.7457  | -1.2730 | 0.168777 |
| Mrpl39        | chr16:84717575-84735742   | 17.5334  | 21.5754  | 0.2993  | 0.253233 |
| Mx1           | chr16:97447034-97462907   | 7.8811   | 16.8896  | 1.0997  | 0.170168 |
| Fth1          | chr19:9982702-9985092     | 117.8098 | 144.8972 | 0.2986  | 0.390931 |
| Cntf          | chr19:12763659-12765632   | 6.1389   | 3.9724   | -0.6280 | 0.241424 |
| Fra10ac1      | chr19:38188480-38224138   | 6.2809   | 8.8076   | 0.4878  | 0.166653 |
| Tram1         | chr1:13564701-13589864    | 133.1136 | 148.2294 | 0.1552  | 0.095609 |
| Eif5b         | chr1:37998009-38055579    | 10.4349  | 8.9567   | -0.2204 | 0.301929 |
| Galnt1        | chr18:24205343-24286818   | 33.1535  | 37.4891  | 0.1773  | 0.118730 |
| Txn14a        | chr18:80206794-80223533   | 20.4627  | 17.1078  | -0.2583 | 0.252606 |
| Tor4a         | chr2:25192965-25196886    | 45.7526  | 52.5804  | 0.2007  | 0.217319 |
| Rc3h2         | chr2:37370068-37422903    | 18.0232  | 16.2939  | -0.1455 | 0.203227 |
| Fastkd1       | chr2:69686814-69713516    | 4.2584   | 3.5005   | -0.2827 | 0.082786 |
| Sestd1        | chr2:77180339-77280592    | 0.9118   | 0.6058   | -0.5899 | 0.248058 |
| Mga           | chr2:119897227-119969581  | 24.4872  | 21.8732  | -0.1629 | 0.307651 |
| Dut           | chr2:125247189-125258608  | 23.8965  | 29.4646  | 0.3022  | 0.291798 |
| Gm14024       | chr2:129246375-129268526  | 1.1317   | 3.1220   | 1.4640  | 0.231613 |
| Gm20458       | chr2:164460966-164490760  | 12.1122  | 16.6003  | 0.4547  | 0.312792 |
| Gcnt7         | chr2:172450312-172458596  | 6.9028   | 5.2101   | -0.4059 | 0.236006 |
| 9230112E08Rik | chr2:180984231-180985591  | 8.3962   | 6.3919   | -0.3935 | 0.023860 |
| Gm7799        | chr3:37959611-37960087    | 3.8003   | 1.7344   | -1.1317 | 0.048626 |
| Etfdh         | chr3:79603787-79628863    | 6.6166   | 7.8908   | 0.2541  | 0.150539 |
| Gm8813        | chr3:84552857-84553452    | 2.2469   | 0.4931   | -2.1881 | 0.269645 |
| 4632404H12Rik | chr3:89767510-89773240    | 5.0417   | 3.8841   | -0.3763 | 0.120979 |
| Acp6          | chr3:97158776-97176574    | 5.9940   | 4.9712   | -0.2699 | 0.091296 |
| Chd7          | chr4:8690405-8867659      | 13.5774  | 11.9843  | -0.1801 | 0.333883 |
| Bach2os       | chr4:32559679-32571708    | 4.2354   | 2.9651   | -0.5144 | 0.175490 |
| Gba2          | chr4:43566927-43578873    | 15.2000  | 13.4590  | -0.1755 | 0.035757 |

|               |                           |          |          |         |          |
|---------------|---------------------------|----------|----------|---------|----------|
| Ndc1          | chr4:107367783-107416346  | 5.7476   | 7.3441   | 0.3536  | 0.287634 |
| Atp13a2       | chr4:140986872-141007330  | 10.5932  | 8.9787   | -0.2386 | 0.305092 |
| Cd300lf       | chr11:115116213-115133992 | 0.0623   | 0.2256   | 1.8565  | 0.080898 |
| Gm27011       | chr8:121949673-121950645  | 0.8472   | 2.3222   | 1.4547  | 0.259435 |
| Sh2d4b        | chr14:40813788-40893266   | 0.1061   | 0.3530   | 1.7337  | 0.053234 |
| Gm5464        | chr14:66868849-66871005   | 0.5151   | 1.4354   | 1.4785  | 0.158171 |
| Atp6v0c       | chr17:24163865-24169702   | 0.9203   | 1.8489   | 1.0065  | 0.121939 |
| Otos          | chr1:92644217-92648841    | 0.2354   | 0.6056   | 1.3631  | 0.157299 |
| Gm22710       | chr1:118459140-118459265  | 5.7162   | 13.4766  | 1.2373  | 0.374095 |
| Gm15423       | chr1:176927998-176932711  | 0.9033   | 0.2458   | -1.8777 | 0.290576 |
| mt-Tl1        | chrM:2675-2750            | 4.5554   | 16.5763  | 1.8635  | 0.155308 |
| Gm11488       | chr4:73497614-73498477    | 1.3234   | 0.3367   | -1.9749 | 0.274554 |
| Nudt17        | chr3:96705891-96708560    | 0.3402   | 1.1142   | 1.7117  | 0.110836 |
| Dhx9          | chr1:153455757-153487660  | 36.4426  | 32.2647  | -0.1757 | 0.303582 |
| Ulbp1         | chr10:7444872-7473477     | 8.1628   | 6.1916   | -0.3987 | 0.181946 |
| Gm17039       | chr13:67360670-67365679   | 5.9663   | 4.7910   | -0.3165 | 0.299469 |
| Art3          | chr5:92331826-92414628    | 1.0021   | 1.5012   | 0.5831  | 0.059197 |
| Zfp319        | chr8:95326136-95331950    | 8.9361   | 7.0845   | -0.3350 | 0.383331 |
| Pcsk7         | chr9:45906568-45929692    | 17.5216  | 20.3417  | 0.2153  | 0.113071 |
| Gm20529       | chr9:108051674-108058592  | 45.5698  | 61.3434  | 0.4288  | 0.117363 |
| Sat1          | chrX:155213131-155216449  | 31.4338  | 36.8641  | 0.2299  | 0.268453 |
| Dazap2        | chr15:100615627-100620731 | 70.0954  | 81.5210  | 0.2179  | 0.271571 |
| Traj11        | chr14:54207138-54207197   | 171.8017 | 111.3678 | -0.6254 | 0.397200 |
| Tceb2         | chr17:23824739-23829109   | 95.7709  | 115.9501 | 0.2758  | 0.270739 |
| Lpp           | chr16:24393349-24992576   | 3.2899   | 2.6905   | -0.2902 | 0.366116 |
| Eprs          | chr1:185363094-185428355  | 77.6011  | 67.4717  | -0.2018 | 0.450799 |
| Trdmt1        | chr2:13509013-13544664    | 3.2876   | 4.3529   | 0.4049  | 0.148922 |
| Fbxo3         | chr2:104027720-104063240  | 12.2851  | 14.0752  | 0.1963  | 0.095345 |
| Arhgap11a     | chr2:113831491-113848661  | 4.8387   | 5.9513   | 0.2986  | 0.155340 |
| Eid1          | chr2:125673099-125675638  | 19.4367  | 24.6100  | 0.3405  | 0.375413 |
| Lrrc16a       | chr13:24012343-24280795   | 0.1279   | 0.2946   | 1.2039  | 0.115009 |
| Tnfrsf11a     | chr1:105780722-105847981  | 0.0605   | 0.2045   | 1.7570  | 0.141504 |
| 5031425E22Rik | chr5:23431809-23433919    | 25.7028  | 22.0428  | -0.2216 | 0.219886 |
| Gpx7          | chr4:108400389-108406961  | 0.2960   | 1.0060   | 1.7649  | 0.050583 |
| Kat6a         | chr8:22859534-22943259    | 25.6380  | 21.9800  | -0.2221 | 0.474498 |
| Nol9          | chr4:152039320-152061494  | 19.6637  | 17.0604  | -0.2049 | 0.349804 |
| Sarnp         | chr10:128821770-128877638 | 15.0007  | 11.3881  | -0.3975 | 0.240641 |
| Gm26920       | chr7:30056033-30090410    | 6.5481   | 5.2040   | -0.3314 | 0.043643 |
| Cyfp1         | chr7:55841744-55930700    | 13.8836  | 16.6474  | 0.2619  | 0.332933 |
| Tango6        | chr8:106683067-106851439  | 3.6633   | 2.8070   | -0.3841 | 0.254690 |
| Lrrc16b       | chr14:55491092-55508246   | 0.5821   | 0.3016   | -0.9486 | 0.198247 |
| Qk            | chr17:10206470-10319361   | 11.3738  | 10.0677  | -0.1760 | 0.268703 |
| Cd244         | chr1:171559192-171585318  | 0.7703   | 0.3989   | -0.9493 | 0.190618 |
| Cpsf3l        | chr4:155869545-155889103  | 30.4500  | 26.9931  | -0.1738 | 0.190386 |
| Pwp1          | chr10:85871830-85889096   | 28.0127  | 23.7044  | -0.2409 | 0.352846 |
| Mbtps1        | chr8:119508155-119558761  | 47.2220  | 41.9933  | -0.1693 | 0.336836 |
| Vps37b        | chr5:124004640-124032260  | 25.5420  | 29.7000  | 0.2176  | 0.109806 |
| Grcc10        | chr6:124739182-124741374  | 40.0221  | 47.4190  | 0.2447  | 0.301528 |
| NA            | chr7:27984855-27985796    | 4.5052   | 2.6193   | -0.7824 | 0.215359 |
| Tex9          | chr9:72458054-72491959    | 4.4852   | 3.4982   | -0.3586 | 0.262557 |
| Rgs2          | chr1:143999337-144004161  | 3.8678   | 5.0964   | 0.3979  | 0.207322 |
| Trp53i11      | chr2:93187547-93201759    | 22.3960  | 26.9642  | 0.2678  | 0.339268 |
| Tmem159       | chr7:120102375-120120992  | 0.8056   | 1.7444   | 1.1146  | 0.099723 |
| Khdc1a        | chr1:21349640-21352200    | 0.2699   | 0.7431   | 1.4612  | 0.071429 |
| Gm18856       | chr13:13964486-13965860   | 0.2293   | 0.7869   | 1.7787  | 0.300608 |
| Rmi2          | chr16:10835058-10892966   | 4.0206   | 3.0194   | -0.4131 | 0.327707 |
| Krtcap2       | chr3:89245965-89249722    | 31.2634  | 37.1015  | 0.2470  | 0.082392 |
| Pigx          | chr16:32084419-32099738   | 23.3919  | 27.6667  | 0.2421  | 0.163896 |
| Nmnat1        | chr4:149467571-149485202  | 1.9249   | 2.9189   | 0.6006  | 0.183604 |
| Traj33        | chr14:54185357-54185414   | 6.7431   | 23.3157  | 1.7898  | 0.111399 |
| Adarb1        | chr10:77290725-77418270   | 0.8720   | 0.6144   | -0.5052 | 0.221816 |
| Nap11l        | chr10:111473191-111498142 | 22.1167  | 19.2861  | -0.1976 | 0.335601 |
| Mrpl22        | chr11:58171660-58179565   | 14.4228  | 10.9920  | -0.3919 | 0.183460 |
| Gm16062       | chr11:59810079-59818491   | 21.4525  | 28.0771  | 0.3883  | 0.238842 |
| Adprm         | chr11:67037904-67052594   | 13.3407  | 16.0671  | 0.2683  | 0.031251 |
| Sebox         | chr11:78503448-78505081   | 1.4846   | 0.4820   | -1.6231 | 0.222110 |
| Ptges3l       | chr11:101418811-101425333 | 0.8356   | 1.4656   | 0.8106  | 0.037128 |
| Gm16045       | chr11:117257648-117263437 | 1.0939   | 0.5906   | -0.8893 | 0.219111 |
| Cbl1l         | chr12:31484828-31499616   | 3.6472   | 2.7894   | -0.3868 | 0.201655 |
| Gfod1         | chr13:43195518-43304172   | 8.8871   | 7.5777   | -0.2300 | 0.297230 |
| Zfp783        | chr6:47943170-47955913    | 3.0627   | 2.3267   | -0.3965 | 0.261801 |

|               |                           |          |          |         |          |
|---------------|---------------------------|----------|----------|---------|----------|
| Rpl32         | chr6:115805504-115808747  | 438.9650 | 528.7812 | 0.2686  | 0.406649 |
| Gm17077       | chr7:30955824-30958004    | 10.8026  | 16.9339  | 0.6485  | 0.080811 |
| Smpd1         | chr7:105554359-105558388  | 11.8070  | 14.5023  | 0.2966  | 0.206645 |
| Fus           | chr7:127967456-127982368  | 15.1950  | 12.5985  | -0.2703 | 0.447004 |
| Pcid2         | chr8:13077188-13105459    | 10.3367  | 12.5677  | 0.2819  | 0.172752 |
| Cbfb          | chr8:105170673-105217986  | 82.3559  | 94.6847  | 0.2013  | 0.265691 |
| Zfp266        | chr9:20495067-20521417    | 20.8935  | 18.6056  | -0.1673 | 0.274944 |
| Gm14820       | chrX:8049171-8074619      | 6.0339   | 4.5128   | -0.4191 | 0.078425 |
| Ngly1         | chr14:16249279-16311926   | 17.3604  | 20.4134  | 0.2337  | 0.255428 |
| Fam98a        | chr17:75537085-75551946   | 7.7188   | 6.3296   | -0.2863 | 0.128635 |
| Msh6          | chr17:87975049-87990883   | 44.7968  | 39.5528  | -0.1796 | 0.345430 |
| Vegfb         | chr19:6982472-6987651     | 4.0060   | 2.6501   | -0.5961 | 0.190977 |
| Grpel2        | chr18:61712439-61726331   | 11.1521  | 9.5867   | -0.2182 | 0.150827 |
| Gm15979       | chr4:135430125-135430841  | 3.1274   | 1.2863   | -1.2817 | 0.265274 |
| Gm15326       | chr13:111867935-111874730 | 1.5792   | 3.2370   | 1.0355  | 0.157996 |
| Cbfa2t3       | chr8:122628738-122699109  | 0.3243   | 0.0865   | -1.9060 | 0.184021 |
| Ino80c        | chr18:24104756-24121953   | 17.7217  | 20.9101  | 0.2387  | 0.135329 |
| Camta1        | chr4:150917321-151861876  | 0.8414   | 0.6350   | -0.4060 | 0.078295 |
| Hpcal1        | chr12:17690813-17791926   | 20.6313  | 25.2585  | 0.2919  | 0.262166 |
| Gm26596       | chr10:112928500-112931155 | 2.6233   | 3.7483   | 0.5148  | 0.169226 |
| Ap1b1         | chr11:4986823-5042791     | 23.6875  | 20.9388  | -0.1779 | 0.284149 |
| Cfap36        | chr11:29221531-29247409   | 8.7982   | 11.0462  | 0.3283  | 0.256809 |
| Arhgap27      | chr11:103331496-103363692 | 16.1824  | 13.7266  | -0.2374 | 0.408115 |
| Pitpnc1       | chr11:107207891-107470699 | 25.1965  | 22.6629  | -0.1529 | 0.202330 |
| Snord1a       | chr11:116674597-116674671 | 21.3142  | 7.1570   | -1.5744 | 0.105512 |
| Entpd5        | chr12:84373856-84409029   | 13.3096  | 11.8511  | -0.1674 | 0.097623 |
| Eml5          | chr12:98786603-98901484   | 8.0715   | 7.0936   | -0.1863 | 0.229853 |
| Ptpn13        | chr5:103425191-103598359  | 16.3799  | 19.7150  | 0.2674  | 0.373529 |
| 1700028K03Rik | chr5:107508943-107551549  | 1.1589   | 1.6601   | 0.5184  | 0.335523 |
| Suds3         | chr5:117091681-117115993  | 39.4551  | 45.5414  | 0.2070  | 0.183907 |
| Rbm19         | chr5:120116509-120197979  | 17.8753  | 15.4276  | -0.2125 | 0.210555 |
| Limk1         | chr5:134656038-134688590  | 3.1261   | 3.9209   | 0.3268  | 0.213722 |
| Exoc4         | chr6:33249084-33973979    | 13.0151  | 11.6684  | -0.1576 | 0.258605 |
| Nup210        | chr6:91013067-91116829    | 88.9908  | 81.2238  | -0.1318 | 0.309095 |
| Irf2bp1       | chr7:19004064-19006761    | 14.2593  | 11.5795  | -0.3003 | 0.319777 |
| Clptm1        | chr7:19631580-19665030    | 23.0998  | 26.6564  | 0.2066  | 0.220925 |
| Pvr           | chr7:19903577-19921160    | 7.1891   | 6.0993   | -0.2372 | 0.173882 |
| Dyrk1b        | chr7:28179468-28187294    | 6.1464   | 4.7053   | -0.3855 | 0.244566 |
| Zfp566        | chr7:30077336-30090527    | 4.4890   | 3.1125   | -0.5283 | 0.183507 |
| Kdelr1        | chr7:45872771-45883731    | 18.5673  | 22.4448  | 0.2736  | 0.178478 |
| Gm6415        | chr7:81161396-81161744    | 1.0082   | 3.1200   | 1.6297  | 0.108024 |
| Nars2         | chr7:96951504-97064761    | 4.8453   | 3.8757   | -0.3221 | 0.198362 |
| Hirip3        | chr7:126861971-126865377  | 9.0908   | 7.5275   | -0.2722 | 0.129476 |
| Psmc13        | chr7:140881967-140898643  | 21.3456  | 24.8027  | 0.2166  | 0.162514 |
| Pcp2          | chr8:3623370-3625545      | 3.0525   | 1.9310   | -0.6606 | 0.217310 |
| Nr3c2         | chr8:76899441-77245012    | 0.2853   | 0.5133   | 0.8472  | 0.172069 |
| Piezo1        | chr8:122481697-122551329  | 12.3186  | 10.6432  | -0.2109 | 0.403912 |
| Rab39         | chr9:53684109-53706232    | 0.4221   | 0.1675   | -1.3338 | 0.091263 |
| Clcn5         | chrX:7153809-7319358      | 1.7416   | 1.3384   | -0.3799 | 0.280331 |
| Gyk           | chrX:85701936-85776819    | 1.3675   | 0.9554   | -0.5174 | 0.229674 |
| A630033H20Rik | chrX:107148926-107173661  | 4.2194   | 5.8035   | 0.4599  | 0.362149 |
| Med30         | chr15:52712444-52730431   | 34.2108  | 42.5289  | 0.3140  | 0.236845 |
| Chrac1        | chr15:73090391-73097554   | 14.4700  | 17.3664  | 0.2632  | 0.156154 |
| Slc48a1       | chr15:97784354-97792692   | 16.1146  | 13.5066  | -0.2547 | 0.272289 |
| Asb8          | chr15:98134636-98165625   | 8.5867   | 10.6705  | 0.3134  | 0.146372 |
| Gm28047       | chr15:102536653-102625421 | 3.2118   | 4.5831   | 0.5130  | 0.241500 |
| Psmc6         | chr14:45329823-45349071   | 69.0746  | 83.0734  | 0.2662  | 0.381422 |
| Spryd7        | chr14:61531992-61556886   | 2.4267   | 3.2524   | 0.4225  | 0.117837 |
| Xpo7          | chr14:70654245-70766628   | 10.9082  | 9.9048   | -0.1392 | 0.126624 |
| Lpar6         | chr14:73237890-73240358   | 33.1413  | 38.3824  | 0.2118  | 0.195550 |
| Acat3         | chr17:12923832-12940402   | 31.4577  | 27.0557  | -0.2175 | 0.336155 |
| Zbtb12        | chr17:34879482-34896842   | 2.4830   | 1.5214   | -0.7066 | 0.288439 |
| Vars          | chr17:35000986-35016322   | 39.5951  | 34.8454  | -0.1844 | 0.379314 |
| Top3b         | chr16:16870735-16892990   | 11.3355  | 10.0691  | -0.1709 | 0.194233 |
| Crkl          | chr16:17451986-17486255   | 27.4234  | 24.4221  | -0.1672 | 0.200448 |
| Ppp1r14b      | chr19:6975047-6977324     | 18.0428  | 13.9403  | -0.3722 | 0.248528 |
| Uhrf2         | chr19:30030512-30093722   | 21.2038  | 23.8720  | 0.1710  | 0.124147 |
| Pcgf5         | chr19:36379066-36456192   | 19.8725  | 16.8082  | -0.2416 | 0.138621 |
| Sec31b        | chr19:44516956-44545864   | 2.0258   | 1.3412   | -0.5950 | 0.372160 |
| 4732440D04Rik | chr1:6213292-6214590      | 6.5252   | 11.2117  | 0.7809  | 0.300292 |
| Kansl3        | chr1:36335729-36369181    | 19.4410  | 17.0737  | -0.1873 | 0.274307 |

|               |                           |          |           |         |          |
|---------------|---------------------------|----------|-----------|---------|----------|
| Slc39a10      | chr1:46807543-46854046    | 7.0283   | 5.5675    | -0.3361 | 0.429393 |
| Cab39         | chr1:85793440-85851576    | 129.3655 | 145.5147  | 0.1697  | 0.240158 |
| Dgkd          | chr1:87853286-87944489    | 46.4701  | 42.7742   | -0.1196 | 0.071248 |
| Rgs16         | chr1:153740348-153745468  | 17.7849  | 21.8210   | 0.2951  | 0.292632 |
| Nit1          | chr1:171338007-171345646  | 16.3906  | 14.4909   | -0.1777 | 0.144330 |
| Tsc1          | chr2:28641227-28691167    | 7.0725   | 6.1720    | -0.1965 | 0.318382 |
| Pkig          | chr2:163658385-163726158  | 0.4075   | 0.7327    | 0.8462  | 0.109082 |
| She           | chr3:89831369-89858834    | 2.5627   | 3.3567    | 0.3894  | 0.186444 |
| Snapi         | chr3:90488025-90491033    | 25.4553  | 29.3840   | 0.2071  | 0.051189 |
| Pogz          | chr3:94837566-94882326    | 6.2518   | 5.3924    | -0.2134 | 0.255017 |
| Strip1        | chr3:107612531-107631710  | 25.9768  | 22.8228   | -0.1867 | 0.258902 |
| Gm568         | chr4:47008315-47010781    | 3.9678   | 1.4355    | -1.4668 | 0.385473 |
| Gm12577       | chr4:58483251-58483825    | 4.0552   | 1.3383    | -1.5994 | 0.216537 |
| Kif2c         | chr4:117159638-117182639  | 5.6073   | 7.0519    | 0.3307  | 0.298261 |
| Snord85       | chr4:130749633-130749706  | 15.7098  | 4.3075    | -1.8667 | 0.235899 |
| Cdc42         | chr4:137319695-137357720  | 201.1586 | 228.7662  | 0.1855  | 0.279280 |
| Muc5b         | chr7:141839071-141873085  | 0.0144   | 0.0595    | 2.0502  | 0.178828 |
| Neil2         | chr14:63182442-63193541   | 1.1800   | 2.3213    | 0.9761  | 0.103654 |
| Dync2li1      | chr17:84626495-84655558   | 0.4606   | 1.3346    | 1.5349  | 0.342771 |
| Gm4202        | chr3:92689424-92690163    | 0.6366   | 2.0325    | 1.6748  | 0.054173 |
| Gm26663       | chr4:11321943-11342953    | 0.3710   | 0.9598    | 1.3712  | 0.251166 |
| Gstt2         | chr10:75831844-75834881   | 22.2369  | 17.9407   | -0.3097 | 0.314100 |
| Gm24265       | chr5:115489458-115489599  | 313.3497 | 561.8055  | 0.8423  | 0.436940 |
| Nsun5         | chr5:135369952-135376805  | 9.8991   | 8.2657    | -0.2602 | 0.178206 |
| Lgals4        | chr7:28833974-28841703    | 1.6804   | 2.7138    | 0.6915  | 0.142159 |
| Cyb5b         | chr8:107150660-107184740  | 36.9888  | 33.0136   | -0.1640 | 0.258507 |
| Cdv3          | chr9:103353101-103365780  | 20.0037  | 17.3739   | -0.2033 | 0.311607 |
| Tmsb4x        | chrX:167207092-167209315  | 974.6831 | 1286.4308 | 0.4004  | 0.265365 |
| 4930579G18Rik | chr14:54650510-54654607   | 28.3593  | 23.1654   | -0.2918 | 0.246168 |
| lqcb1         | chr16:36828384-36872721   | 1.6301   | 2.2308    | 0.4526  | 0.170484 |
| Plk3          | chr4:117128654-117133963  | 15.5424  | 19.7098   | 0.3427  | 0.358461 |
| Fnbp1l        | chr3:122538718-122619667  | 0.0947   | 0.2774    | 1.5501  | 0.126954 |
| BC001981      | chr13:100108034-100108337 | 4.7474   | 1.5656    | -1.6005 | 0.266046 |
| Brat1         | chr5:140705010-140719379  | 5.8062   | 6.9370    | 0.2567  | 0.120784 |
| Gm15270       | chr10:24549440-24597108   | 0.1145   | 0.4522    | 1.9814  | 0.151467 |
| Hist1h2bk     | chr13:22035820-22036299   | 57.5969  | 93.3647   | 0.6969  | 0.322096 |
| Dlgap5        | chr14:47387778-47418407   | 6.6399   | 8.1400    | 0.2939  | 0.288710 |
| 9130011E15Rik | chr19:45818143-45998488   | 5.2997   | 4.1614    | -0.3488 | 0.128898 |
| Uqcr11        | chr10:80402996-80406830   | 32.1315  | 10.0082   | 0.3519  | 0.226356 |
| Sh3bp1        | chr15:78899666-78919032   | 25.3535  | 21.6827   | -0.2256 | 0.419025 |
| Ap3s1         | chr18:46741916-46790826   | 4.4344   | 6.2404    | 0.4929  | 0.118536 |
| Gnb1          | chr4:155491360-155559269  | 41.2587  | 36.8326   | -0.1637 | 0.298512 |
| Ncf2          | chr1:152807889-152836990  | 1.3610   | 2.4419    | 0.8433  | 0.146663 |
| Mrpl44        | chr1:79776017-79781445    | 17.7353  | 21.4248   | 0.2727  | 0.053067 |
| Pigyl         | chr9:22156845-22158358    | 3.7469   | 6.2892    | 0.7472  | 0.260742 |
| Zfp41         | chr15:75616678-75625300   | 6.0968   | 7.6656    | 0.3303  | 0.209129 |
| Hsf1          | chr15:76477444-76500972   | 21.7645  | 17.6750   | -0.3003 | 0.411404 |
| Lclat1        | chr17:73107984-73243368   | 25.9087  | 29.1286   | 0.1690  | 0.039399 |
| Popdc2        | chr16:38362208-38378216   | 0.5264   | 1.0165    | 0.9494  | 0.157847 |
| Gdpd1         | chr11:87033866-87074062   | 0.5467   | 0.1598    | -1.7742 | 0.168992 |
| Uqcrf51       | chr13:30540307-30545362   | 37.0642  | 44.9696   | 0.2789  | 0.261518 |
| Vps25         | chr11:101253706-101259549 | 25.9809  | 21.8930   | -0.2470 | 0.245290 |
| 3110056K07Rik | chr12:70991614-71015832   | 18.0440  | 14.6280   | -0.3028 | 0.215688 |
| Paics         | chr5:76951306-76967509    | 63.7418  | 55.6111   | -0.1969 | 0.422482 |
| Ccng2         | chr5:93267256-93276231    | 20.5335  | 23.3582   | 0.1859  | 0.139154 |
| Mrps18c       | chr5:100798626-100804471  | 14.0304  | 18.9526   | 0.4338  | 0.296009 |
| Atxn2l        | chr7:126491707-126503437  | 19.3075  | 16.4042   | -0.2351 | 0.363958 |
| Slc26a6       | chr9:108854036-108912558  | 4.3098   | 3.0674    | -0.4906 | 0.268331 |
| Fundc2        | chrX:75382398-75396459    | 9.8542   | 12.9002   | 0.3886  | 0.344387 |
| Fance         | chr17:28313529-28326568   | 5.5088   | 6.8982    | 0.3245  | 0.130776 |
| Med15         | chr16:17651220-17722930   | 17.0431  | 13.9867   | -0.2851 | 0.422985 |
| Rpl35a        | chr16:33056452-33060189   | 45.3169  | 55.3561   | 0.2887  | 0.438615 |
| Insig2        | chr1:121304352-121332589  | 7.3318   | 5.7743    | -0.3445 | 0.321637 |
| Adamtsl4      | chr3:95676200-95687917    | 4.2812   | 3.2327    | -0.4053 | 0.312596 |
| 4430402i18Rik | chr19:28901267-28967800   | 0.1488   | 0.4353    | 1.5492  | 0.287040 |
| Hdhd3         | chr4:62499007-62503467    | 1.5617   | 0.5955    | -1.3908 | 0.283866 |
| Rnu3a         | chr10:40258466-40258678   | 160.1270 | 295.7267  | 0.8850  | 0.464565 |
| Akirin1-ps    | chr11:85216596-85217054   | 2.4381   | 0.6892    | -1.8227 | 0.351874 |
| Exd2          | chr12:80463094-80498135   | 11.4043  | 9.7458    | -0.2267 | 0.136253 |
| Rbak          | chr5:143172185-143180775  | 6.2712   | 7.6834    | 0.2930  | 0.113472 |
| Rac1          | chr5:143505477-143528036  | 68.0483  | 77.2121   | 0.1823  | 0.217611 |

|               |                           |          |          |         |          |
|---------------|---------------------------|----------|----------|---------|----------|
| Snora7a       | chr6:115807974-115808114  | 52.5568  | 79.7465  | 0.6015  | 0.485517 |
| Dmwd          | chr7:19076248-19082776    | 1.0518   | 0.5252   | -1.0020 | 0.224906 |
| Map3k10       | chr7:27656374-27674598    | 4.0045   | 3.0456   | -0.3949 | 0.230278 |
| Emc10         | chr7:44489936-44496529    | 21.8476  | 25.4909  | 0.2225  | 0.187800 |
| Arcn1         | chr9:44741563-44767845    | 31.3468  | 28.3689  | -0.1440 | 0.218579 |
| Gm15511       | chr9:69348888-69364247    | 3.9065   | 6.3715   | 0.7058  | 0.014367 |
| Nufip1        | chr14:76110890-76137379   | 12.2132  | 10.5649  | -0.2092 | 0.128347 |
| Gm5493        | chr17:22739943-22751509   | 0.2735   | 0.7468   | 1.4495  | 0.150367 |
| Stk16         | chr1:75210837-75215606    | 18.4730  | 15.8411  | -0.2217 | 0.310980 |
| Hsd11b1       | chr1:193221629-193264054  | 22.6389  | 26.1158  | 0.2061  | 0.064291 |
| Dstn          | chr2:143915319-143943324  | 15.0712  | 18.5633  | 0.3007  | 0.228348 |
| Sypl2         | chr3:108211471-108226648  | 0.5021   | 0.1937   | -1.3740 | 0.269214 |
| Gm12534       | chr3:37231332-37232469    | 2.6628   | 6.3691   | 1.2581  | 0.242203 |
| Adh1          | chr3:138260990-138290698  | 0.1913   | 0.6191   | 1.6940  | 0.065890 |
| Metap1        | chr3:138458959-138489382  | 42.4696  | 37.5700  | -0.1768 | 0.297039 |
| Drg2          | chr11:60454590-60468754   | 18.0653  | 15.4483  | -0.2258 | 0.196746 |
| Mir20a        | chr14:115044156-115044263 | 12.7860  | 5.3002   | -1.2705 | 0.081959 |
| Gm28042       | chr2:120027482-120043033  | 5.5750   | 4.7617   | -0.2275 | 0.193028 |
| Klh5          | chr5:65107567-65168188    | 4.2667   | 5.2846   | 0.3087  | 0.124486 |
| Mmp15         | chr8:95352267-95374293    | 0.6277   | 0.2838   | -1.1451 | 0.252900 |
| Mtmr11        | chr3:96162003-96171718    | 4.4136   | 3.3530   | -0.3965 | 0.327134 |
| Atg5          | chr10:44268357-44364291   | 17.1885  | 21.2244  | 0.3043  | 0.297266 |
| Bud31         | chr5:145140361-145148078  | 41.2259  | 50.5379  | 0.2938  | 0.377181 |
| Cyp2d22       | chr15:82370527-82380260   | 1.4657   | 0.8873   | -0.7242 | 0.194158 |
| Mdc1          | chr17:35841514-35859670   | 8.4161   | 7.2580   | -0.2136 | 0.253406 |
| Snord22       | chr19:8725865-8725991     | 56.5294  | 90.0003  | 0.6709  | 0.399122 |
| Klh17         | chr4:156229043-156234857  | 14.8428  | 12.5396  | -0.2433 | 0.297711 |
| Sult2b1       | chr7:45729982-45759612    | 1.8285   | 2.8385   | 0.6345  | 0.122297 |
| Pnpla6        | chr8:3515383-3544266      | 12.9968  | 11.3405  | -0.1967 | 0.192878 |
| Ube2v1        | chr2:167607637-167632095  | 2.7275   | 1.8717   | -0.5433 | 0.278556 |
| Rpl22l1       | chr3:28805435-28807352    | 57.6740  | 73.7163  | 0.3541  | 0.380788 |
| Lims1         | chr10:58323465-58424691   | 43.6784  | 49.2134  | 0.1721  | 0.161279 |
| Sumo3         | chr10:77606096-77641543   | 20.9961  | 24.6235  | 0.2299  | 0.289326 |
| Mrps17        | chr5:129715496-129718875  | 25.9819  | 22.1125  | -0.2326 | 0.302542 |
| Pnp           | chr14:50944301-50965237   | 10.8613  | 13.0793  | 0.2681  | 0.192357 |
| Fam46c        | chr3:100451627-100489324  | 15.9485  | 18.6283  | 0.2241  | 0.299526 |
| Apex2         | chrX:150519518-150589868  | 3.8446   | 3.0746   | -0.3224 | 0.354486 |
| Ino80b        | chr6:83121764-83125431    | 13.9136  | 10.9414  | -0.3467 | 0.265043 |
| Slc35d3       | chr10:19847916-19851459   | 0.1711   | 0.4748   | 1.4725  | 0.074038 |
| Slc7a6os      | chr8:106200437-106210933  | 31.5040  | 27.4405  | -0.1992 | 0.115591 |
| Mapkbp1       | chr2:119972698-120027408  | 4.7466   | 5.6279   | 0.2457  | 0.101990 |
| Gnb2l1        | chr11:48800331-48806434   | 270.0088 | 313.1303 | 0.2138  | 0.378275 |
| Tex261        | chr6:83768880-83775812    | 23.2563  | 20.6324  | -0.1727 | 0.223884 |
| 1700058P15Rik | chr7:19258491-19259739    | 25.3746  | 17.8183  | -0.5100 | 0.304565 |
| Pgap2         | chr7:102210207-102238567  | 7.9136   | 6.6388   | -0.2534 | 0.201878 |
| Trappc11      | chr8:47490114-47533470    | 16.7438  | 15.0499  | -0.1539 | 0.166166 |
| Smim7         | chr8:72565187-72571088    | 13.7152  | 15.9373  | 0.2166  | 0.028749 |
| Prkar2a       | chr9:108692142-108749512  | 4.9481   | 4.0323   | -0.2953 | 0.088561 |
| Trio          | chr15:27730651-28025848   | 5.2034   | 4.5706   | -0.1871 | 0.126598 |
| Pced1b        | chr15:97247106-97385689   | 14.1412  | 11.8828  | -0.2510 | 0.190766 |
| Zfp944        | chr17:22337988-22361400   | 9.9894   | 12.2152  | 0.2902  | 0.201670 |
| Hspbap1       | chr16:35770385-35828446   | 4.2222   | 3.3416   | -0.3375 | 0.203143 |
| Cuedc2        | chr19:46329811-46338660   | 7.6339   | 10.0105  | 0.3910  | 0.237226 |
| Gm4955        | chr1:173468508-173491041  | 16.1689  | 19.2221  | 0.2495  | 0.242830 |
| Itpkb         | chr1:180330484-180424802  | 55.8814  | 49.8161  | -0.1658 | 0.418602 |
| Pias2         | chr18:77065207-77155708   | 13.3162  | 11.8075  | -0.1735 | 0.146834 |
| Madd          | chr2:91137359-91183837    | 29.4289  | 26.1937  | -0.1680 | 0.384822 |
| Uckl1         | chr2:181569148-181584892  | 16.6554  | 19.3222  | 0.2143  | 0.183060 |
| Celf3         | chr3:94478830-94492193    | 1.6686   | 0.9352   | -0.8353 | 0.295206 |
| Tuft1         | chr3:94612756-94658872    | 1.3403   | 2.0409   | 0.6066  | 0.150048 |
| St3gal3       | chr4:117932153-118134914  | 1.8435   | 2.6630   | 0.5306  | 0.096706 |
| Nkain1        | chr4:130531601-130574173  | 0.7055   | 0.1825   | -1.9506 | 0.232170 |
| Gm26035       | chrX:152923452-152923760  | 2.2692   | 4.9051   | 1.1121  | 0.005288 |
| Saal1         | chr7:46686107-46710680    | 2.5914   | 3.2339   | 0.3196  | 0.158670 |
| Gm17388       | chr4:136355773-136359440  | 4.4076   | 3.4003   | -0.3743 | 0.225717 |
| Il6ra         | chr3:89869323-89913162    | 36.8772  | 33.0441  | -0.1583 | 0.192941 |
| Gm26636       | chr6:87908842-87914459    | 21.6187  | 16.7616  | -0.3671 | 0.403109 |
| Fam50a        | chrX:74313032-74320149    | 14.3058  | 11.8856  | -0.2674 | 0.208778 |
| Tmem176a      | chr6:48841482-48845364    | 1.5885   | 2.7675   | 0.8009  | 0.045002 |
| Tnfrsf1a      | chr6:125349361-125362484  | 8.1262   | 6.4481   | -0.3337 | 0.305588 |
| Zdhhc3        | chr9:123066159-123113205  | 9.8378   | 11.1620  | 0.1822  | 0.108841 |

|               |                           |           |           |         |          |
|---------------|---------------------------|-----------|-----------|---------|----------|
| Slmap         | chr14:26413167-26534931   | 13.7505   | 12.1488   | -0.1787 | 0.303116 |
| Tubb6         | chr18:67390716-67402748   | 2.2737    | 3.4339    | 0.5948  | 0.115827 |
| Pofut2        | chr10:77259299-77269586   | 16.4289   | 13.4267   | -0.2911 | 0.351216 |
| Nup37         | chr10:88146991-88178388   | 11.7980   | 15.4880   | 0.3926  | 0.264994 |
| lft20         | chr11:78536360-78541737   | 22.7428   | 27.7489   | 0.2870  | 0.226866 |
| Snx13         | chr12:35047188-35147469   | 12.6154   | 14.4198   | 0.1929  | 0.107828 |
| Prelid1       | chr13:55322054-55325271   | 82.0146   | 97.4373   | 0.2486  | 0.334503 |
| Nt5c3         | chr6:56882399-56923932    | 11.5557   | 13.8490   | 0.2612  | 0.294837 |
| Hmg20a        | chr9:56418643-56496884    | 18.6000   | 16.4622   | -0.1762 | 0.135488 |
| E230001N04Rik | chr17:28523256-28525347   | 3.3158    | 4.6839    | 0.4984  | 0.188677 |
| Pycr2         | chr1:180904273-180908087  | 24.2643   | 30.1638   | 0.3140  | 0.331006 |
| Pigs          | chr11:78328414-78342782   | 19.6819   | 16.4339   | -0.2602 | 0.350573 |
| Gm10840       | chr11:106160849-106161158 | 6.0977    | 2.7119    | -1.1689 | 0.280608 |
| Calu          | chr6:29348068-29377110    | 32.3102   | 37.3338   | 0.2085  | 0.277510 |
| Rplp1         | chr9:61913283-61914538    | 1670.1607 | 1993.9821 | 0.2557  | 0.450326 |
| Cysltr1       | chrX:106574345-106603679  | 1.2476    | 0.7490    | -0.7361 | 0.305847 |
| Mcrs1         | chr15:99242817-99251961   | 7.3100    | 9.1756    | 0.3279  | 0.019820 |
| Plcb3         | chr19:6953713-6969759     | 10.9933   | 8.9009    | -0.3046 | 0.403203 |
| Gm23639       | chr18:33795163-33795295   | 6.3280    | 15.1885   | 1.2631  | 0.145417 |
| Eya3          | chr4:132638986-132724765  | 19.0612   | 17.0993   | -0.1567 | 0.164421 |
| Gm20456       | chr11:22839298-22842604   | 7.0669    | 2.7885    | -1.3416 | 0.333270 |
| Gm15642       | chr11:109437171-109438145 | 2.8483    | 6.9186    | 1.2804  | 0.199253 |
| Gm12936       | chr4:126584508-126584809  | 3.3344    | 0.9705    | -1.7806 | 0.293790 |
| Gm16755       | chr11:120486338-120488582 | 11.5115   | 8.3911    | -0.4562 | 0.193679 |
| Gm24524       | chr5:86079765-86079935    | 10.0872   | 4.0266    | -1.3249 | 0.319802 |
| Pde3b         | chr7:114415280-114539251  | 9.4087    | 8.0783    | -0.2199 | 0.320860 |
| Stip1         | chr19:7020695-7040026     | 92.4992   | 81.5225   | -0.1822 | 0.402741 |
| Vps72         | chr3:95111021-95123051    | 9.8569    | 11.6169   | 0.2370  | 0.067596 |
| Snora20       | chr17:12922789-12922917   | 1.6683    | 7.8845    | 2.2407  | 0.264845 |
| Rps15a-ps3    | chr4:150847112-150847507  | 1.1150    | 3.3602    | 1.5915  | 0.185432 |
| Zfp771        | chr7:127244525-127254803  | 4.6376    | 6.5794    | 0.5046  | 0.222878 |
| Pdss2         | chr10:43221485-43464882   | 2.2707    | 1.6847    | -0.4306 | 0.323953 |
| H2afv         | chr11:6427228-6444443     | 30.1644   | 35.7292   | 0.2443  | 0.227511 |
| 2810001G20Rik | chr11:64079483-64083259   | 17.1734   | 13.6177   | -0.3347 | 0.227781 |
| Psme3         | chr11:101316212-101323537 | 46.2290   | 41.0778   | -0.1704 | 0.292209 |
| Cep112        | chr11:108425191-108860615 | 2.1683    | 3.0729    | 0.5030  | 0.429512 |
| Lin52         | chr12:84451507-84531533   | 2.0905    | 3.0393    | 0.5398  | 0.055010 |
| Gm10244       | chr6:39419886-39421294    | 3.1643    | 5.4659    | 0.7886  | 0.191989 |
| 2310044K18Rik | chr7:83659574-83660963    | 7.3104    | 10.8678   | 0.5720  | 0.276335 |
| Rps3          | chr7:99477895-99483738    | 292.3362  | 341.7380  | 0.2253  | 0.413560 |
| Fbxl19        | chr7:127746774-127768927  | 5.1098    | 6.4952    | 0.3461  | 0.222901 |
| Trappc5       | chr8:3676298-3681255      | 18.8801   | 15.9064   | -0.2473 | 0.342301 |
| Nrp1          | chr8:128359072-128505462  | 58.7690   | 66.2974   | 0.1739  | 0.260071 |
| 5830462I19Rik | chr9:110372047-110375430  | 10.0561   | 8.1333    | -0.3062 | 0.362300 |
| Utp14a        | chrX:48256861-48282453    | 24.6122   | 20.8723   | -0.2378 | 0.430630 |
| Atp6v1c1      | chr15:38661903-38692443   | 29.6257   | 34.4875   | 0.2192  | 0.157402 |
| Ptger2        | chr14:44988194-45003820   | 14.9115   | 17.8259   | 0.2575  | 0.288633 |
| Tagap1        | chr17:6954964-6961156     | 7.5679    | 6.1171    | -0.3070 | 0.088210 |
| Gm26873       | chr17:17389942-17395303   | 6.2286    | 4.7770    | -0.3828 | 0.309456 |
| Exosc1        | chr19:41922979-41933314   | 19.2051   | 15.7826   | -0.2832 | 0.315970 |
| Acsl3         | chr1:78657824-78706987    | 5.5829    | 4.2237    | -0.4025 | 0.405234 |
| Lin9          | chr1:180641149-180690518  | 7.6559    | 9.8591    | 0.3649  | 0.273424 |
| lws1          | chr18:32067733-32104331   | 25.0599   | 23.1119   | -0.1167 | 0.056328 |
| Pfdn1         | chr18:36403678-36454495   | 31.0502   | 39.1347   | 0.3338  | 0.288629 |
| H13           | chr2:152669460-152708670  | 25.0806   | 22.8305   | -0.1356 | 0.249139 |
| Atp8b2        | chr3:89939480-89963508    | 31.1210   | 27.9619   | -0.1544 | 0.353877 |
| Dennd2c       | chr3:103102603-103169769  | 0.9390    | 0.6145    | -0.6117 | 0.229452 |
| Zfp59         | chr7:27842854-27855086    | 1.3057    | 2.7360    | 1.0672  | 0.272720 |
| Maneal        | chr4:124855238-124862171  | 1.3637    | 2.6206    | 0.9424  | 0.187949 |
| Gm20627       | chr3:96254618-96256277    | 1.2450    | 0.3262    | -1.9321 | 0.385675 |
| Ascc3         | chr10:50592668-50851202   | 36.7382   | 33.5117   | -0.1326 | 0.236589 |
| Dusp6         | chr10:99263230-99267488   | 18.5316   | 22.5759   | 0.2848  | 0.310882 |
| BC048403      | chr10:121739936-121752878 | 2.7383    | 1.9220    | -0.5107 | 0.230981 |
| 4930566F21Rik | chr5:31486628-31495179    | 1.6820    | 0.7107    | -1.2429 | 0.239979 |
| Tmem128       | chr5:38260184-38269622    | 21.1711   | 24.8844   | 0.2331  | 0.105046 |
| Zfp518b       | chr5:38668483-38684826    | 1.2096    | 1.8170    | 0.5870  | 0.315087 |
| Ube2k         | chr5:65537232-65598988    | 6.7192    | 8.1512    | 0.2787  | 0.278634 |
| Traf1         | chr5:121371724-121385632  | 15.5546   | 18.1198   | 0.2202  | 0.211161 |
| 1700019G17Rik | chr6:85899050-85904884    | 2.2820    | 3.2603    | 0.5147  | 0.192645 |
| Dctn5         | chr7:122133040-122149044  | 26.9767   | 31.9294   | 0.2432  | 0.255908 |
| Paox          | chr7:140125656-140134334  | 1.6658    | 0.9175    | -0.8604 | 0.274214 |

|               |                           |          |          |         |          |
|---------------|---------------------------|----------|----------|---------|----------|
| Agpat5        | chr8:18846276-18891361    | 4.3205   | 3.6044   | -0.2614 | 0.359652 |
| Prkaca        | chr8:83972977-83996445    | 23.0650  | 19.7392  | -0.2246 | 0.314648 |
| Stt3a         | chr9:36731274-36767679    | 22.0446  | 24.5759  | 0.1568  | 0.035726 |
| Senp8         | chr9:59734258-59750649    | 2.6943   | 1.8615   | -0.5334 | 0.317780 |
| Pccb          | chr9:100982031-101034898  | 7.8993   | 6.5418   | -0.2720 | 0.063445 |
| Cerk          | chr15:86139127-86186141   | 13.4383  | 15.3260  | 0.1896  | 0.026820 |
| Arhgap22      | chr14:33214025-33369934   | 0.6105   | 0.2704   | -1.1748 | 0.290844 |
| Dad1          | chr14:54235478-54254104   | 23.7202  | 20.8679  | -0.1848 | 0.241909 |
| Cnpy3         | chr17:46735704-46752214   | 15.6486  | 13.0395  | -0.2631 | 0.297733 |
| Galm          | chr17:80127470-80185101   | 12.8728  | 15.3046  | 0.2496  | 0.093896 |
| Pten          | chr19:32757496-32826160   | 21.9806  | 19.8617  | -0.1462 | 0.312119 |
| Phyh          | chr2:4919018-4938730      | 25.6862  | 30.9608  | 0.2694  | 0.276961 |
| Sec61a2       | chr2:5870986-5895432      | 5.5079   | 4.2529   | -0.3730 | 0.384343 |
| Noxa1         | chr2:25085666-25095149    | 1.1370   | 2.0340   | 0.8391  | 0.239476 |
| Gm20412       | chr2:158117153-158117905  | 4.8604   | 2.6175   | -0.8929 | 0.199547 |
| Srsf6         | chr2:162931527-162937121  | 103.8522 | 94.6665  | -0.1336 | 0.283100 |
| B330016D10Rik | chr4:141546188-141547892  | 3.0499   | 4.5513   | 0.5775  | 0.360143 |
| Gm23394       | chr12:55821062-55821153   | 11.5951  | 3.2464   | -1.8366 | 0.171074 |
| Gm9903        | chr5:33629924-33632092    | 0.6007   | 1.3868   | 1.2070  | 0.144729 |
| Snora69       | chrX:37082911-37083042    | 4.6597   | 11.9447  | 1.3581  | 0.160071 |
| Fam160a2      | chr7:105371210-105400054  | 3.1438   | 2.6909   | -0.2244 | 0.143620 |
| Vapa          | chr17:65580055-65613555   | 56.2045  | 65.0613  | 0.2111  | 0.231205 |
| Zmym1         | chr4:127047093-127061152  | 11.0882  | 13.0263  | 0.2324  | 0.131374 |
| Mtfr2         | chr10:20347818-20361669   | 1.7898   | 0.9938   | -0.8488 | 0.298858 |
| Gm25206       | chr10:128084142-128084216 | 38.0408  | 21.4242  | -0.8283 | 0.128029 |
| Gm12188       | chr11:49088233-49088543   | 6.6496   | 2.7740   | -1.2613 | 0.141861 |
| Gm17194       | chr12:79168485-79168833   | 10.7104  | 6.6823   | -0.6806 | 0.034337 |
| Jdp2          | chr12:85599104-85639878   | 2.0127   | 2.9986   | 0.5752  | 0.067838 |
| Gm26514       | chr13:38945542-38951313   | 3.2556   | 2.2506   | -0.5326 | 0.499709 |
| Bend4         | chr5:67392146-67427799    | 0.5765   | 0.2655   | -1.1189 | 0.307908 |
| Trim28        | chr7:13024151-13031035    | 78.8192  | 71.4357  | -0.1419 | 0.371846 |
| Ccne1         | chr7:38097983-38107534    | 9.0131   | 11.2605  | 0.3212  | 0.228149 |
| Spns1         | chr7:126370059-126377450  | 13.3303  | 11.5845  | -0.2025 | 0.194052 |
| Pycard        | chr7:127992102-127993867  | 78.4455  | 88.6989  | 0.1772  | 0.112299 |
| Pet100        | chr8:3621550-3624231      | 25.5075  | 32.0508  | 0.3294  | 0.360807 |
| Ankrd37       | chr8:45996901-45999867    | 6.4725   | 4.4171   | -0.5512 | 0.322952 |
| Nup93         | chr8:94214596-94315066    | 23.8152  | 20.9151  | -0.1873 | 0.224904 |
| Zfp810        | chr9:22276747-22307638    | 9.1036   | 11.0195  | 0.2756  | 0.167936 |
| Zbtb38        | chr9:96682762-96752831    | 14.9492  | 16.8306  | 0.1710  | 0.171566 |
| Pigf          | chr17:86997255-87025406   | 11.1039  | 14.5047  | 0.3855  | 0.111902 |
| Abcc5         | chr16:20331302-20426394   | 6.3974   | 5.5805   | -0.1971 | 0.270280 |
| Sap130        | chr18:31634370-31723061   | 10.5605  | 8.7618   | -0.2694 | 0.388382 |
| Pdpf          | chr2:181187246-181188771  | 19.4317  | 15.4712  | -0.3288 | 0.361195 |
| Capza1        | chr3:104822778-104864505  | 24.8672  | 28.6632  | 0.2050  | 0.192951 |
| AI504432      | chr3:107039503-107054347  | 38.7616  | 34.3661  | -0.1736 | 0.388075 |
| Rbm12b1       | chr4:12140263-12146731    | 7.6141   | 6.2045   | -0.2953 | 0.214239 |
| Raver2        | chr4:101068982-101152370  | 2.9458   | 2.2582   | -0.3835 | 0.365486 |
| Sirpa         | chr2:129592834-129632228  | 0.1659   | 0.3871   | 1.2220  | 0.049441 |
| H2-DMb1       | chr17:34153071-34160223   | 0.4435   | 1.1101   | 1.3237  | 0.162662 |
| Gm17399       | chr9:118150230-118170376  | 0.1628   | 0.7771   | 2.2548  | 0.148225 |
| Sgpp1         | chr12:75714247-75735729   | 36.6618  | 33.1515  | -0.1452 | 0.107774 |
| Gm13623       | chr2:69766181-69766806    | 2.7687   | 0.9606   | -1.5272 | 0.256709 |
| Ylpm1         | chr12:84996320-85070515   | 6.0818   | 5.0285   | -0.2744 | 0.455346 |
| Gm5           | chr13:31819578-32338712   | 2.9274   | 4.1516   | 0.5040  | 0.280298 |
| Tusc3         | chr8:39005866-39165112    | 30.9239  | 35.8458  | 0.2131  | 0.038925 |
| Rpl17         | chr18:75000476-75003381   | 22.5269  | 17.7050  | -0.3475 | 0.245148 |
| Mocs3         | chr2:168230621-168232302  | 10.0983  | 7.6344   | -0.4035 | 0.332320 |
| Epb4.1l2      | chr10:25359797-25523519   | 17.6606  | 20.3039  | 0.2012  | 0.178776 |
| Abhd17a       | chr10:80583648-80590341   | 28.9297  | 36.1846  | 0.3228  | 0.421172 |
| Slc38a7       | chr8:95835919-95853539    | 4.2883   | 3.3492   | -0.3566 | 0.303275 |
| Elovl5        | chr9:77917363-77984519    | 63.8477  | 71.3053  | 0.1594  | 0.135552 |
| Mcm6          | chr1:128331590-128359656  | 137.3517 | 153.0876 | 0.1565  | 0.184043 |
| Gm10827       | chr10:18235052-18238060   | 1.0251   | 0.6013   | -0.7698 | 0.016503 |
| Itgb2         | chr10:77530251-77565708   | 199.6602 | 182.3027 | -0.1312 | 0.351618 |
| Lrp1          | chr10:127538160-127621148 | 0.1444   | 0.0518   | -1.4790 | 0.468021 |
| Ube2g1        | chr11:72607282-72686481   | 10.6507  | 12.9187  | 0.2785  | 0.305287 |
| Map3k3        | chr11:106084612-106155446 | 44.8509  | 41.0387  | -0.1282 | 0.152800 |
| Acot13        | chr13:24817947-24831517   | 16.9430  | 21.7866  | 0.3627  | 0.105633 |
| Gm26515       | chr5:110779881-110781127  | 2.9485   | 1.5850   | -0.8955 | 0.195796 |
| Csgalnact2    | chr6:118107451-118139140  | 5.5535   | 6.7645   | 0.2846  | 0.210373 |
| NA            | chr7:29155679-29156918    | 3.5578   | 2.2379   | -0.6688 | 0.159065 |



|               |                           |         |         |         |          |
|---------------|---------------------------|---------|---------|---------|----------|
| Kcnc1         | chr7:46396496-46438375    | 0.1845  | 0.0815  | -1.1792 | 0.182192 |
| Mical2        | chr7:112225855-112355194  | 0.4145  | 0.2621  | -0.6616 | 0.178156 |
| Gm8822        | chrX:81820383-81822730    | 4.3911  | 5.7409  | 0.3867  | 0.098933 |
| Ap5m1         | chr14:49066494-49087723   | 23.3437 | 20.8431 | -0.1635 | 0.106318 |
| Mrps34        | chr17:24895115-24897502   | 19.7671 | 23.8597 | 0.2715  | 0.259420 |
| Tnf           | chr17:35199380-35202007   | 39.3518 | 45.9515 | 0.2237  | 0.224016 |
| Vps8          | chr16:21423117-21644680   | 6.7341  | 5.9044  | -0.1897 | 0.156625 |
| Rpp30         | chr19:36083715-36104772   | 10.1751 | 13.9389 | 0.4541  | 0.303304 |
| Plekhb2       | chr1:34849975-34879580    | 14.0137 | 16.1914 | 0.2084  | 0.291959 |
| Cd55          | chr1:130439026-130462744  | 6.3835  | 5.4044  | -0.2402 | 0.135669 |
| Slc19a2       | chr1:164249045-164265385  | 3.5787  | 2.6243  | -0.4475 | 0.352308 |
| Sft2d2        | chr1:165174340-165194433  | 24.5251 | 27.8269 | 0.1822  | 0.205575 |
| Acvr1c        | chr2:58267452-58357895    | 0.6266  | 0.4305  | -0.5415 | 0.066674 |
| Fahd2a        | chr2:127436214-127444565  | 11.3737 | 8.2232  | -0.4679 | 0.494493 |
| Spg20         | chr3:55112107-55137322    | 7.2238  | 8.5077  | 0.2360  | 0.106997 |
| Taf13         | chr3:108571697-108583222  | 1.8903  | 2.6311  | 0.4770  | 0.093496 |
| Taf12         | chr4:132274374-132295766  | 11.6445 | 14.3257 | 0.2990  | 0.320699 |
| Gale          | chr4:135963726-135968178  | 6.4140  | 8.1426  | 0.3443  | 0.169221 |
| Myo1d         | chr11:80482125-80780025   | 0.2091  | 0.4016  | 0.9413  | 0.210595 |
| Tradd         | chr8:105258285-105264609  | 21.7294 | 18.2578 | -0.2511 | 0.284168 |
| Gm11537       | chr11:96766801-96768269   | 12.2525 | 8.7020  | -0.4936 | 0.334302 |
| D17H6S53E     | chr17:35126372-35128855   | 19.2569 | 22.3193 | 0.2129  | 0.020515 |
| Rnf208        | chr2:25242254-25244262    | 1.2043  | 0.4720  | -1.3512 | 0.261614 |
| Tet2          | chr3:133463678-133544390  | 14.7678 | 12.8090 | -0.2053 | 0.438490 |
| Mib2          | chr4:155654676-155669198  | 9.3801  | 7.7048  | -0.2838 | 0.379784 |
| Tle2          | chr10:81574560-81590845   | 0.0745  | 0.2056  | 1.4644  | 0.091145 |
| Itpk1         | chr12:102568581-102704929 | 14.9917 | 17.9890 | 0.2629  | 0.315882 |
| Hus1b         | chr13:30946572-30947759   | 1.7940  | 0.8906  | -1.0104 | 0.206412 |
| Smim15        | chr13:108046423-108049146 | 41.8552 | 50.1788 | 0.2617  | 0.328819 |
| Afap1         | chr5:35893318-36003923    | 1.9355  | 1.5039  | -0.3640 | 0.237246 |
| Agbl3         | chr6:34780431-34859459    | 0.2749  | 0.4265  | 0.6333  | 0.090465 |
| Smyd5         | chr6:85431988-85446435    | 20.4470 | 18.0036 | -0.1836 | 0.219924 |
| Zfp28         | chr7:6383317-6396633      | 2.1647  | 3.0872  | 0.5121  | 0.192455 |
| 6330408A02Rik | chr7:13258966-13278721    | 2.5570  | 2.0359  | -0.3288 | 0.378202 |
| AW146154      | chr7:41478879-41499890    | 4.0899  | 5.2657  | 0.3645  | 0.257683 |
| Icam1         | chr9:21015959-21028797    | 37.1520 | 42.6054 | 0.1976  | 0.202023 |
| Glud1         | chr14:34310726-34345144   | 64.6393 | 59.7749 | -0.1129 | 0.093683 |
| Golgb1        | chr16:36875139-36933085   | 11.9189 | 10.8686 | -0.1331 | 0.118629 |
| D19Bwg1357e   | chr19:27388701-27429820   | 30.6693 | 26.3327 | -0.2199 | 0.434297 |
| Slc27a4       | chr2:29802633-29817522    | 6.4069  | 5.3519  | -0.2596 | 0.197843 |
| Cops2         | chr2:125830303-125859139  | 35.6853 | 41.4833 | 0.2172  | 0.312261 |
| Gm25878       | chr2:167063472-167063565  | 46.2235 | 27.9992 | -0.7232 | 0.239328 |
| Ttyh2         | chr11:114675430-114720977 | 0.4681  | 0.8979  | 0.9398  | 0.330620 |
| Bcas1         | chr2:170346990-170427845  | 0.4696  | 0.8913  | 0.9245  | 0.295516 |
| Ttc39a        | chr4:109406622-109444745  | 0.0567  | 0.2001  | 1.8193  | 0.058670 |
| Gpr153        | chr4:152274231-152285337  | 0.0847  | 0.2763  | 1.7063  | 0.162094 |
| Ccdc174       | chr6:91878052-91899843    | 6.1650  | 5.4393  | -0.1807 | 0.070116 |
| Map3k2        | chr18:32163088-32236751   | 16.0164 | 14.4618 | -0.1473 | 0.251991 |
| Rin3          | chr12:102283047-102390855 | 9.7071  | 8.1780  | -0.2473 | 0.418914 |
| Traf3         | chr12:111166369-111267153 | 20.4838 | 18.0148 | -0.1853 | 0.397567 |
| Nup153        | chr13:46679904-46727940   | 85.2578 | 79.8544 | -0.0945 | 0.015344 |
| Gpr124        | chr8:27085582-27123436    | 0.4795  | 0.2640  | -0.8607 | 0.094329 |
| Prdx4         | chrX:155323917-155340754  | 10.3845 | 12.9008 | 0.3130  | 0.226332 |
| Gtf2f2        | chr14:75896936-76010865   | 20.6362 | 25.2609 | 0.2917  | 0.238365 |
| Diexf         | chr1:193104402-193130251  | 8.0487  | 6.9774  | -0.2061 | 0.177808 |
| Mex3c         | chr18:73573043-73592575   | 35.0135 | 31.0384 | -0.1739 | 0.379376 |
| Tagln         | chr9:45929627-45936058    | 2.5661  | 4.6124  | 0.8459  | 0.337574 |
| Enc1          | chr13:97241104-97253039   | 3.5003  | 2.5833  | -0.4383 | 0.437303 |
| Arhgap44      | chr11:65002038-65162961   | 0.2250  | 0.0673  | -1.7412 | 0.248352 |
| Ddx26b        | chrX:56454856-56507843    | 11.3933 | 13.1141 | 0.2029  | 0.179752 |
| Ap5z1         | chr5:142463930-142478715  | 9.8793  | 8.2300  | -0.2635 | 0.312988 |
| Sh3gl1        | chr17:56016752-56036637   | 40.2798 | 34.9400 | -0.2052 | 0.357558 |
| Cdk9          | chr2:32705783-32713076    | 8.7218  | 10.4934 | 0.2668  | 0.253018 |
| Atf2          | chr2:73816508-73892639    | 10.2376 | 9.1464  | -0.1626 | 0.151718 |
| Cdk13         | chr13:17715961-17805097   | 46.6183 | 43.2539 | -0.1081 | 0.099869 |
| Uvssa         | chr5:33378550-33419754    | 8.6849  | 7.6077  | -0.1911 | 0.283617 |
| Rybp          | chr6:100228565-100287441  | 3.6751  | 2.9678  | -0.3084 | 0.068502 |
| Cat           | chr2:103453848-103485160  | 34.2272 | 39.9483 | 0.2230  | 0.283802 |
| Gm14403       | chr2:177498214-177509763  | 1.1417  | 0.5230  | -1.1263 | 0.203866 |
| Arfgap1       | chr2:180967224-180982526  | 19.7556 | 17.3664 | -0.1860 | 0.356035 |
| C92006O11Rik  | chr9:78175913-78178879    | 1.8873  | 3.7351  | 0.9848  | 0.156136 |

|               |                           |          |          |         |          |
|---------------|---------------------------|----------|----------|---------|----------|
| Pml           | chr9:58218075-58249786    | 14.7877  | 12.4355  | -0.2499 | 0.463427 |
| Acs1          | chr8:46471040-46536051    | 2.4192   | 2.9909   | 0.3060  | 0.172568 |
| Rdh13         | chr7:4424769-4445649      | 2.4957   | 2.0014   | -0.3184 | 0.121801 |
| Rps26-ps1     | chr8:107439175-107439585  | 9.7660   | 14.5978  | 0.5799  | 0.202835 |
| Zbtb46        | chr7:181387761-181459426  | 1.7560   | 2.2564   | 0.3617  | 0.193640 |
| 3110040N11Rik | chr7:81782181-81789478    | 15.9113  | 12.6141  | -0.3350 | 0.234915 |
| Scarna9       | chr9:15326263-15326333    | 58.8860  | 84.7158  | 0.5247  | 0.033982 |
| Gm24067       | chr9:20889483-20889568    | 18.2922  | 8.7514   | -1.0637 | 0.074806 |
| Yipf6         | chrX:98936315-98949017    | 8.6474   | 10.0439  | 0.2160  | 0.173550 |
| Npcd          | chr15:79789674-79834237   | 8.0249   | 10.4648  | 0.3830  | 0.171354 |
| Fam131a       | chr16:20693281-20703048   | 0.2669   | 0.5955   | 1.1581  | 0.140263 |
| Atrn          | chr2:130906494-131030333  | 6.9815   | 6.2352   | -0.1631 | 0.227247 |
| Zfp90         | chr8:106415338-106425889  | 3.1485   | 4.3787   | 0.4758  | 0.227021 |
| Ostm1         | chr10:42583821-42702459   | 12.7987  | 14.5678  | 0.1868  | 0.147006 |
| Supt6         | chr11:78206745-78245987   | 32.0260  | 29.5034  | -0.1184 | 0.084658 |
| Fbxl20        | chr11:98082555-98150403   | 11.2303  | 10.0239  | -0.1640 | 0.345835 |
| Rpl21         | chr5:146832889-146837032  | 7.6670   | 6.3876   | -0.2634 | 0.225240 |
| Spryd3        | chr15:102116527-102136234 | 12.0530  | 14.4583  | 0.2625  | 0.254753 |
| Wbp4          | chr14:7945936-79481268    | 14.6839  | 17.2312  | 0.2308  | 0.177889 |
| Sgms1         | chr19:32122726-32389714   | 5.7037   | 6.8501   | 0.2642  | 0.286070 |
| Nsun6         | chr2:14995130-15054884    | 3.9753   | 3.1064   | -0.3558 | 0.325231 |
| Xrra1         | chr7:99859217-99917824    | 0.1949   | 0.5857   | 1.5876  | 0.121383 |
| Sod2          | chr17:13007838-13018119   | 13.6510  | 15.7243  | 0.2040  | 0.053645 |
| Zc3hav1l      | chr6:38287395-38299259    | 0.8319   | 0.5392   | -0.6256 | 0.203027 |
| Eri3          | chr4:117550364-117674297  | 10.5620  | 8.9174   | -0.2442 | 0.198157 |
| Rps8          | chr4:117153826-117156243  | 28.3877  | 35.0075  | 0.3024  | 0.324952 |
| Grk6          | chr13:55445333-55460925   | 136.1999 | 124.9663 | -0.1242 | 0.317061 |
| Arhgap17      | chr7:123279149-123369915  | 4.4169   | 3.4946   | -0.3379 | 0.203695 |
| Isyna1        | chr8:70594480-70597288    | 43.4424  | 37.3351  | -0.2186 | 0.403054 |
| Mapkapk3      | chr9:107254926-107289877  | 23.1832  | 26.4419  | 0.1897  | 0.238445 |
| Vps52         | chr17:33955811-33966984   | 19.0257  | 16.8827  | -0.1724 | 0.197091 |
| Atp5j         | chr16:84827865-84835625   | 13.6446  | 16.6180  | 0.2844  | 0.331828 |
| Sumo1         | chr1:59639433-59670834    | 19.6161  | 24.4244  | 0.3163  | 0.361765 |
| Rpl37a        | chr1:72711259-72713809    | 68.6123  | 84.3103  | 0.2972  | 0.377241 |
| Gm4204        | chr1:135232044-135233404  | 1.9149   | 0.8315   | -1.2035 | 0.313718 |
| Elac1         | chr18:73735037-73754479   | 4.5131   | 3.6070   | -0.3233 | 0.268351 |
| Uap111        | chr2:25359888-25365682    | 5.6613   | 6.9437   | 0.2946  | 0.168079 |
| Mrps5         | chr2:127587221-127606829  | 6.7889   | 5.7617   | -0.2367 | 0.312593 |
| Npepl1        | chr2:174110348-174123070  | 36.0421  | 31.6822  | -0.1860 | 0.383985 |
| Gpr113        | chr5:30193430-30205722    | 0.4030   | 0.1175   | -1.7778 | 0.332615 |
| Gm14122       | chr2:150398255-150399399  | 0.4890   | 1.4033   | 1.5211  | 0.168121 |
| Slc39a11      | chr11:113244852-113650079 | 7.8393   | 9.2674   | 0.2414  | 0.000024 |
| Sp110         | chr1:85576898-85598817    | 21.6516  | 19.5968  | -0.1439 | 0.194536 |
| Tpm3          | chr3:90072648-90100902    | 41.8640  | 46.2430  | 0.1435  | 0.069851 |
| G6pc3         | chr11:102189619-102194081 | 6.3682   | 8.0251   | 0.3336  | 0.082982 |
| Atxn7l3       | chr11:102289299-102296631 | 30.4878  | 27.3741  | -0.1554 | 0.263980 |
| Mgat2         | chr12:69184157-69186772   | 40.9469  | 46.2860  | 0.1768  | 0.143851 |
| Cwc27         | chr13:104631139-104817142 | 7.7401   | 9.4830   | 0.2930  | 0.145681 |
| Dmtf1         | chr5:9118800-9161749      | 46.3395  | 41.5592  | -0.1571 | 0.342583 |
| Nod2          | chr8:88647314-88688474    | 1.1279   | 1.7453   | 0.6299  | 0.208899 |
| Ppp1r7        | chr1:93342853-93373489    | 5.9329   | 5.1569   | -0.2022 | 0.260381 |
| 4930518l15Rik | chr2:156856615-156857946  | 9.1547   | 6.4760   | -0.4994 | 0.401330 |
| Vps13d        | chr4:144972625-145194995  | 14.1251  | 12.7864  | -0.1436 | 0.385625 |
| Dhx8          | chr11:101732918-101767358 | 23.8987  | 21.6020  | -0.1458 | 0.184703 |
| Sdha          | chr13:74322253-74350280   | 66.3737  | 61.1518  | -0.1182 | 0.168252 |
| Gtf3a         | chr5:146948656-146955614  | 26.4987  | 31.0947  | 0.2307  | 0.285442 |
| Zfp329        | chr7:12804976-12818858    | 17.9471  | 15.8603  | -0.1783 | 0.349734 |
| Rltpr         | chr8:105690905-105698178  | 29.0359  | 25.6687  | -0.1778 | 0.242800 |
| Cyb561d2      | chr9:107539010-107541865  | 9.9474   | 12.5081  | 0.3305  | 0.193833 |
| Pcca          | chr14:122534323-122891100 | 6.6653   | 5.4702   | -0.2851 | 0.353905 |
| Nfkb1         | chr3:135584654-135691547  | 124.1774 | 114.5397 | -0.1166 | 0.317912 |
| Gm23582       | chr11:21249421-21249560   | 18.6571  | 8.1552   | -1.1939 | 0.268130 |
| Kat8          | chr7:127912516-127925832  | 13.6163  | 17.5635  | 0.3673  | 0.314879 |
| Smad5         | chr13:56703009-56742377   | 11.2792  | 9.8723   | -0.1922 | 0.365603 |
| Gm21885       | chr11:94284651-94285985   | 4.7851   | 10.0644  | 1.0727  | 0.218001 |
| Kpna6         | chr4:129643979-129672767  | 14.4879  | 12.6830  | -0.1920 | 0.375415 |
| Stab1         | chr14:31139012-31168641   | 0.4418   | 0.7684   | 0.7983  | 0.221241 |
| lsg15         | chr4:156199423-156200818  | 8.0739   | 12.7232  | 0.6561  | 0.277914 |
| Fars2         | chr13:36117410-36537592   | 12.0226  | 14.4458  | 0.2649  | 0.106734 |
| Rab2b         | chr14:52261758-52279545   | 6.0976   | 5.0173   | -0.2813 | 0.263073 |
| Heca          | chr10:17900465-17948067   | 70.5194  | 77.7159  | 0.1402  | 0.036940 |

|               |                           |           |           |         |          |
|---------------|---------------------------|-----------|-----------|---------|----------|
| Igtp          | chr11:58199555-58207591   | 132.9030  | 149.2729  | 0.1676  | 0.203069 |
| E2f3          | chr13:29906574-29985668   | 6.5503    | 5.3462    | -0.2930 | 0.346914 |
| Tpst2         | chr5:112276690-112315361  | 33.6478   | 38.5062   | 0.1946  | 0.236299 |
| Trbj2-5       | chr6:41543452-41543501    | 164.2744  | 115.7572  | -0.5050 | 0.271199 |
| Rps5          | chr7:12922289-12926686    | 453.0911  | 533.7050  | 0.2362  | 0.430746 |
| Fuz           | chr7:44896078-44902631    | 14.2227   | 12.3151   | -0.2078 | 0.354724 |
| Gm166         | chr7:127582383-127588595  | 11.8462   | 14.1639   | 0.2578  | 0.156385 |
| Bub3          | chr7:131560390-131571898  | 55.4293   | 63.1066   | 0.1871  | 0.217392 |
| Oaz2          | chr9:65668000-65690300    | 4.1939    | 5.8130    | 0.4710  | 0.334717 |
| Ube2a         | chrX:36874357-36884215    | 20.6846   | 16.8875   | -0.2926 | 0.336140 |
| Gm8606        | chrX:155504036-155504924  | 2.8883    | 1.4114    | -1.0331 | 0.435925 |
| Emc2          | chr15:43477228-43527777   | 32.6454   | 39.6077   | 0.2789  | 0.298644 |
| Gm26724       | chr17:27201031-27203071   | 8.2179    | 6.3838    | -0.3644 | 0.204290 |
| BC051537      | chr17:34083842-34095309   | 1.8807    | 1.1530    | -0.7059 | 0.093685 |
| Umps          | chr16:33954781-33967038   | 25.5644   | 21.9270   | -0.2214 | 0.414243 |
| Nsun3         | chr16:62732443-62786818   | 4.8311    | 3.9765    | -0.2808 | 0.181792 |
| Obsl1         | chr1:75479309-75506452    | 0.1310    | 0.0319    | -2.0373 | 0.175803 |
| Dnlz          | chr2:26348120-26352110    | 14.8548   | 12.6742   | -0.2290 | 0.310949 |
| Scmh1         | chr4:120405280-120530186  | 0.9930    | 0.7150    | -0.4737 | 0.139455 |
| Gm26716       | chr4:130824393-130826313  | 4.2601    | 2.0290    | -1.0701 | 0.090906 |
| Tom1          | chr8:75033685-75070121    | 0.1540    | 0.4952    | 1.6846  | 0.058759 |
| Gm11454       | chr2:163122605-163143959  | 0.6374    | 1.6841    | 1.4016  | 0.061028 |
| Eif2b4        | chr5:31187557-31193430    | 15.2432   | 18.1346   | 0.2506  | 0.181967 |
| Tbl2          | chr5:135149656-135163873  | 5.5147    | 6.5207    | 0.2417  | 0.087326 |
| Tial1         | chr7:128439776-128461717  | 20.4849   | 18.6249   | -0.1373 | 0.091336 |
| Psm1          | chr7:114264605-114276118  | 57.1342   | 65.8328   | 0.2045  | 0.270932 |
| Hist1h2ae     | chr13:23570516-23571220   | 4.5954    | 7.2020    | 0.6482  | 0.275240 |
| Fip1l1        | chr5:74535448-74598790    | 18.4631   | 17.0008   | -0.1190 | 0.085798 |
| Bola1         | chr3:96196587-96219709    | 4.9701    | 7.2347    | 0.5417  | 0.240814 |
| 4932443L11Rik | chr8:4162521-4206882      | 0.6283    | 1.3611    | 1.1151  | 0.319802 |
| Akap12        | chr10:4266328-4359468     | 4.5083    | 5.5291    | 0.2945  | 0.297900 |
| Apaf1         | chr10:90989310-91082770   | 12.3253   | 14.2110   | 0.2054  | 0.292235 |
| Ykt6          | chr11:5955692-5967780     | 36.5925   | 41.1431   | 0.1691  | 0.071788 |
| Utp6          | chr11:79932320-79962390   | 22.3209   | 19.8837   | -0.1668 | 0.261317 |
| Galk1         | chr11:116008456-116012719 | 25.3398   | 21.9571   | -0.2067 | 0.056844 |
| Mfsd11        | chr11:116852439-116875635 | 8.5545    | 7.2935    | -0.2301 | 0.377044 |
| Lpcat1        | chr13:73467196-73516422   | 23.6571   | 27.4997   | 0.2171  | 0.322516 |
| Clec2d        | chr6:129180614-129186534  | 415.6920  | 463.1297  | 0.1559  | 0.247663 |
| Akap13        | chr7:75455533-75754609    | 81.1648   | 74.4658   | -0.1243 | 0.375019 |
| Rnf121        | chr7:102019136-102065469  | 6.9918    | 5.7453    | -0.2833 | 0.373258 |
| Tecr          | chr8:83571699-83594491    | 71.7363   | 62.5810   | -0.1970 | 0.394364 |
| Chmp1a        | chr8:123204263-123212763  | 24.4671   | 28.9380   | 0.2421  | 0.326381 |
| Samd8         | chr14:21750530-21798725   | 3.7738    | 3.2269    | -0.2259 | 0.036015 |
| Traj8         | chr14:54209917-54209954   | 53.1849   | 20.8174   | -1.3532 | 0.254697 |
| Chtf18        | chr17:25718925-25727419   | 3.1316    | 3.9093    | 0.3200  | 0.057167 |
| Rgs11         | chr17:26202950-26211324   | 2.5133    | 1.8407    | -0.4494 | 0.260183 |
| Rab31         | chr17:65651725-65772752   | 2.4757    | 3.3832    | 0.4505  | 0.212973 |
| Heg1          | chr16:33684465-33771576   | 11.8673   | 10.3275   | -0.2005 | 0.470275 |
| Cdk2ap2       | chr19:4097181-4099019     | 76.8622   | 89.6358   | 0.2218  | 0.387698 |
| Myrf          | chr19:10208271-10240748   | 0.7428    | 0.4572    | -0.7002 | 0.104738 |
| NA            | chr2:26014594-26014747    | 7.8314    | 3.1037    | -1.3353 | 0.270887 |
| Gm13556       | chr2:38286254-38287291    | 3.5822    | 1.2897    | -1.4738 | 0.423138 |
| Sppl2a        | chr2:126890390-126933235  | 18.1037   | 20.4686   | 0.1771  | 0.216683 |
| Gm15952       | chr3:35933044-35942717    | 1.8845    | 0.8076    | -1.2224 | 0.119858 |
| Arhgef11      | chr3:87617558-87738034    | 5.1060    | 6.2384    | 0.2890  | 0.308607 |
| Ints3         | chr3:90391379-90433636    | 16.9580   | 19.6680   | 0.2139  | 0.231369 |
| Mttp          | chr3:138089854-138143388  | 0.2040    | 0.4816    | 1.2392  | 0.297023 |
| Ythdf2        | chr4:132184911-132212303  | 26.2336   | 23.7476   | -0.1436 | 0.181745 |
| Gm1826        | chr2:87393482-87394644    | 0.2206    | 0.9226    | 2.0642  | 0.170648 |
| Cela2a        | chr4:141814961-141826160  | 0.1302    | 0.4759    | 1.8705  | 0.079664 |
| Ctrc          | chr4:141814961-141846359  | 0.1570    | 0.5742    | 1.8707  | 0.079664 |
| Gm26917       | chr17:39843012-39846341   | 2866.6574 | 2522.9330 | -0.1843 | 0.519125 |
| Golim4        | chr3:75876182-75956949    | 3.3763    | 2.8750    | -0.2319 | 0.114240 |
| Fam216a       | chr5:122364579-122372364  | 8.9018    | 11.3912   | 0.3557  | 0.159186 |
| Tbxas1        | chr6:38875403-39084585    | 0.4252    | 0.2442    | -0.7999 | 0.316675 |
| Fgf13         | chrX:59062144-59568071    | 0.2039    | 0.4780    | 1.2289  | 0.182907 |
| Smu1          | chr4:40736541-40757923    | 54.9692   | 49.3818   | -0.1546 | 0.352480 |
| Zdhhc17       | chr10:110941781-111010066 | 10.0790   | 11.9930   | 0.2508  | 0.264452 |
| Tbc1d15       | chr10:115197876-115251493 | 7.1458    | 5.8493    | -0.2888 | 0.312899 |
| Anxa6         | chr11:54979107-55033445   | 230.0797  | 253.0299  | 0.1372  | 0.172544 |
| Zkscan6       | chr11:65807174-65829239   | 13.0863   | 15.9558   | 0.2860  | 0.257503 |

|               |                           |          |          |         |          |
|---------------|---------------------------|----------|----------|---------|----------|
| Mrpl27        | chr11:94653766-94660089   | 14.3069  | 11.5336  | -0.3109 | 0.026806 |
| Adcy3         | chr12:4133102-4213525     | 9.9897   | 8.6284   | -0.2114 | 0.357360 |
| 1110008L16Rik | chr12:55302636-55382491   | 7.0005   | 5.7768   | -0.2772 | 0.173689 |
| Syne2         | chr12:75818133-76110926   | 1.8034   | 2.1428   | 0.2488  | 0.254942 |
| Gm22790       | chr12:105645842-105645971 | 9.2963   | 2.2481   | -2.0479 | 0.360662 |
| Map3k1        | chr13:111746427-111808993 | 34.9970  | 31.8939  | -0.1340 | 0.329169 |
| Akap9         | chr5:3928053-4080209      | 17.6619  | 16.0027  | -0.1423 | 0.341148 |
| Slc4a1ap      | chr5:31526994-31554042    | 14.8106  | 13.2033  | -0.1657 | 0.152421 |
| Gm22249       | chr5:38546457-38546593    | 47.8986  | 29.8835  | -0.6806 | 0.355672 |
| Gm10401       | chr5:115097688-115098295  | 18.6670  | 13.4416  | -0.4738 | 0.431832 |
| Pop5          | chr5:115235835-115245351  | 17.7036  | 15.1175  | -0.2278 | 0.308985 |
| Trbv12-1      | chr6:41113566-41114067    | 22.6291  | 30.5305  | 0.4321  | 0.127019 |
| Tgfb1i1       | chr7:128246811-128253712  | 0.6520   | 0.3307   | -0.9791 | 0.326320 |
| Pddc1         | chr7:141408134-141414136  | 14.1261  | 17.1622  | 0.2809  | 0.266627 |
| Prdx2         | chr8:84969586-84974834    | 25.6463  | 29.1566  | 0.1851  | 0.085754 |
| Nfat5         | chr8:107293469-107379517  | 6.5860   | 5.6669   | -0.2168 | 0.477654 |
| Stoml1        | chr9:58253163-58262523    | 11.2814  | 9.1961   | -0.2949 | 0.266866 |
| Trf           | chr9:103204000-103230444  | 0.6606   | 1.0929   | 0.7262  | 0.194503 |
| Ppp2r3d       | chr9:124422621-124424154  | 7.0536   | 4.2576   | -0.7283 | 0.141480 |
| Mbnl3         | chrX:51117268-51206532    | 8.0971   | 6.9176   | -0.2271 | 0.373151 |
| Hcfc1         | chrX:73942791-73966357    | 24.1616  | 21.1558  | -0.1917 | 0.456863 |
| Stard8        | chrX:99003247-99074728    | 0.4210   | 0.1460   | -1.5276 | 0.416933 |
| Nxt2          | chrX:142226769-142239692  | 1.5498   | 2.3647   | 0.6096  | 0.211314 |
| Poldip3       | chr15:83125977-83149384   | 38.5083  | 34.9559  | -0.1396 | 0.351277 |
| Gm16976       | chr14:44858670-44974944   | 4.3893   | 3.3434   | -0.3927 | 0.271794 |
| Xdh           | chr17:73883907-73950182   | 16.5402  | 19.5229  | 0.2392  | 0.347892 |
| St3gal6       | chr16:58468124-58524243   | 1.8832   | 1.2811   | -0.5559 | 0.425533 |
| lvns1abp      | chr1:151344497-151364445  | 85.4499  | 77.8730  | -0.1340 | 0.355325 |
| Taf4b         | chr18:14783244-14900359   | 7.2290   | 6.2933   | -0.2000 | 0.069443 |
| Fam13b        | chr18:34442351-34506823   | 28.1515  | 24.9999  | -0.1713 | 0.301861 |
| NA            | chr2:3504528-3512759      | 6.8189   | 8.3427   | 0.2910  | 0.296149 |
| Zbtb34        | chr2:33406107-33431324    | 1.9017   | 1.4656   | -0.3758 | 0.182651 |
| Gm16523       | chr2:39161250-39161989    | 3.1299   | 1.4670   | -1.0933 | 0.191061 |
| Rbm45         | chr2:76369983-76383768    | 54.3708  | 48.5039  | -0.1647 | 0.299690 |
| Tspan18       | chr2:93201759-93334505    | 0.6020   | 0.3722   | -0.6940 | 0.419634 |
| Sv2a          | chr3:96181150-96195521    | 2.2998   | 1.7107   | -0.4270 | 0.260010 |
| Gm12811       | chr4:109569213-109656791  | 1.9733   | 3.6711   | 0.8956  | 0.178472 |
| A930038B10Rik | chr14:34759401-34770553   | 0.1479   | 0.3396   | 1.1994  | 0.186869 |
| Emilin2       | chr17:71252175-71310965   | 0.0796   | 0.2309   | 1.5361  | 0.030620 |
| Cdh23         | chr10:60302747-60696490   | 1.6494   | 2.0698   | 0.3275  | 0.360457 |
| Ptbp1         | chr10:79854426-79864771   | 57.8061  | 52.4495  | -0.1403 | 0.362267 |
| Mtif2         | chr11:29526407-29545279   | 11.3571  | 13.6096  | 0.2610  | 0.297555 |
| Zfp322a       | chr13:23353102-23369208   | 15.1917  | 13.3699  | -0.1843 | 0.282962 |
| Dok3          | chr13:55523234-55528538   | 0.5129   | 1.0547   | 1.0402  | 0.134013 |
| Sri           | chr5:8046077-8069379      | 51.8017  | 58.6659  | 0.1795  | 0.267741 |
| Tmem165       | chr5:76183879-76209245    | 33.4370  | 38.3899  | 0.1993  | 0.207214 |
| Gimap3        | chr6:48765088-48766519    | 369.0770 | 339.0295 | -0.1225 | 0.306142 |
| Atp5sl        | chr7:25619413-25625551    | 15.3289  | 12.9967  | -0.2381 | 0.336697 |
| Fam98c        | chr7:29152510-29156234    | 13.2152  | 11.1611  | -0.2437 | 0.294722 |
| 9330020H09Rik | chr15:98567323-98569583   | 6.1631   | 4.8631   | -0.3418 | 0.127708 |
| Ms4a4d        | chr19:11536800-11558467   | 0.8696   | 1.8243   | 1.0689  | 0.112952 |
| Lman2l        | chr1:36422064-36445271    | 1.8410   | 1.4177   | -0.3769 | 0.127040 |
| Dnah7a        | chr1:53397001-53706784    | 0.4868   | 0.3156   | -0.6251 | 0.337077 |
| Nop58         | chr1:59685005-59711510    | 112.3004 | 95.8803  | -0.2281 | 0.518591 |
| Tlk1          | chr2:70712406-70825728    | 25.8186  | 23.3836  | -0.1429 | 0.273149 |
| E030042O20Rik | chr2:75704769-75710024    | 2.2954   | 1.2582   | -0.8674 | 0.383008 |
| Polr3f        | chr2:144527717-144541995  | 8.0828   | 9.3585   | 0.2114  | 0.185407 |
| Plcg1         | chr2:160731299-160775760  | 63.8864  | 58.4537  | -0.1282 | 0.362191 |
| Zfp362        | chr4:128773087-128806045  | 5.2861   | 4.0792   | -0.3739 | 0.346548 |
| Tas1r1        | chr4:152027913-152038568  | 0.2194   | 0.0622   | -1.8184 | 0.284871 |
| Dbil5         | chr11:76217607-76218666   | 1.8441   | 0.6425   | -1.5212 | 0.233660 |
| Tmem231       | chr8:111912017-111933791  | 0.2534   | 0.5954   | 1.2327  | 0.101583 |
| Efemp2        | chr19:5473972-5481853     | 0.6559   | 1.1528   | 0.8137  | 0.154005 |
| Wnt8b         | chr19:44493471-44514273   | 0.3591   | 0.1232   | -1.5438 | 0.386698 |
| Rps3a1        | chr3:86137939-86142702    | 71.4851  | 86.3848  | 0.2731  | 0.380981 |
| Snora21       | chr11:97781638-97781775   | 11.0879  | 19.8803  | 0.8424  | 0.106194 |
| Zfp954        | chr7:7114689-7121445      | 12.5240  | 14.9916  | 0.2595  | 0.092191 |
| Tbc1d2b       | chr9:90202046-90270804    | 15.2187  | 17.2158  | 0.1779  | 0.197109 |
| 9430015G10Rik | chr4:15610981-156127265   | 10.5849  | 9.0629   | -0.2240 | 0.244928 |
| Rbmxl1        | chr8:78505270-78508928    | 5.6756   | 4.2433   | -0.4196 | 0.171199 |
| Sfr1          | chr19:47731755-47735588   | 66.3116  | 76.7681  | 0.2112  | 0.274236 |

|               |                           |          |         |         |          |
|---------------|---------------------------|----------|---------|---------|----------|
| H60b          | chr10:22158585-22288849   | 7.0343   | 4.9407  | -0.5097 | 0.267340 |
| Yeats4        | chr10:117215141-117224507 | 39.3061  | 46.0683 | 0.2290  | 0.251187 |
| Gm11998       | chr11:11557420-11579460   | 3.7675   | 2.1490  | -0.8100 | 0.299428 |
| Ublcp1        | chr11:44454570-44470498   | 7.1256   | 5.7506  | -0.3093 | 0.259352 |
| Gm17334       | chr11:53772280-53773187   | 31.5075  | 37.2962 | 0.2433  | 0.088532 |
| Bzw2          | chr12:36091845-36156825   | 110.8234 | 97.9769 | -0.1777 | 0.452389 |
| Rbm33         | chr5:28317120-28419244    | 13.3289  | 11.9424 | -0.1585 | 0.372396 |
| Setd8         | chr5:124439929-124462308  | 13.8112  | 12.0808 | -0.1931 | 0.243940 |
| Usp12         | chr5:146734808-146795006  | 14.6557  | 12.8116 | -0.1940 | 0.281148 |
| Gm16042       | chr6:8595737-8596988      | 24.6142  | 31.1000 | 0.3374  | 0.394629 |
| Gm16042       | chr6:8595742-8596989      | 24.6932  | 31.1998 | 0.3374  | 0.394629 |
| Ankrd42       | chr7:92581722-92637142    | 0.2723   | 0.4826  | 0.8256  | 0.116090 |
| Ino80e        | chr7:126851579-126862377  | 13.9923  | 12.3184 | -0.1838 | 0.290307 |
| Phkg2         | chr7:127573339-127583305  | 15.9066  | 18.1379 | 0.1894  | 0.086531 |
| Gm26572       | chr8:121091627-121094858  | 2.0283   | 1.4472  | -0.4869 | 0.115706 |
| Basp1         | chr15:25363284-25413764   | 2.0454   | 1.3025  | -0.6511 | 0.124781 |
| Stk38         | chr17:28970884-29007945   | 25.9835  | 23.5979 | -0.1389 | 0.299392 |
| B630019A10Rik | chr16:23175287-23224446   | 9.0521   | 7.4248  | -0.2859 | 0.182677 |
| Armc9         | chr1:86154779-86278284    | 1.2439   | 0.9522  | -0.3855 | 0.312930 |
| Gorab         | chr1:163384908-163403641  | 4.6477   | 6.3356  | 0.4470  | 0.315161 |
| Lars          | chr18:42202349-42262122   | 43.3337  | 37.5417 | -0.2070 | 0.465172 |
| Cercam        | chr2:29869163-29882840    | 0.5766   | 0.2767  | -1.0593 | 0.268028 |
| Pag1          | chr3:9687478-9833679      | 12.5263  | 11.1860 | -0.1633 | 0.337306 |
| Chmp5         | chr4:40948406-40965303    | 38.1834  | 44.3954 | 0.2175  | 0.186636 |
| Cd72          | chr4:43446461-43454628    | 8.9929   | 10.6998 | 0.2507  | 0.182203 |
| 2310026L22Rik | chr4:138215713-138216189  | 4.9246   | 2.6678  | -0.8844 | 0.026760 |
| Gm17201       | chr10:128391841-128395563 | 5.7736   | 2.1506  | -1.4247 | 0.276612 |
| E230013L22Rik | chr8:11477928-11480241    | 0.4956   | 1.1320  | 1.1916  | 0.250226 |
| Fig4          | chr10:41188171-41303241   | 19.5147  | 17.2087 | -0.1814 | 0.286534 |
| Tdg           | chr10:82629827-82650799   | 2.4085   | 1.9255  | -0.3229 | 0.057438 |
| Ppp2ca        | chr11:52098680-52127778   | 46.0523  | 51.1947 | 0.1527  | 0.193153 |
| Timp2         | chr11:118301068-118355740 | 13.7960  | 16.2581 | 0.2369  | 0.325766 |
| Cnot6l        | chr5:96070332-96164171    | 23.0105  | 21.0152 | -0.1309 | 0.285444 |
| Gm23751       | chr6:125121723-125121859  | 19.4034  | 9.6286  | -1.0109 | 0.390049 |
| Phldb3        | chr7:24611327-24629288    | 9.3697   | 7.4711  | -0.3267 | 0.351437 |
| Dusp4         | chr8:34807296-34819894    | 15.2435  | 18.4726 | 0.2772  | 0.329964 |
| Rnf166        | chr8:122466146-122476064  | 41.1603  | 36.7001 | -0.1655 | 0.259863 |
| Endod1        | chr9:14353989-14381242    | 29.0920  | 32.8354 | 0.1746  | 0.209487 |
| Prdm10        | chr9:31280537-31378543    | 4.5101   | 3.7110  | -0.2813 | 0.304572 |
| Edc3          | chr9:57708539-57752499    | 13.5247  | 11.7068 | -0.2083 | 0.416946 |
| Bbs4          | chr9:59321965-59353508    | 8.0690   | 6.3377  | -0.3484 | 0.340517 |
| Tex264        | chr9:106658746-106685948  | 14.3302  | 16.9204 | 0.2397  | 0.116793 |
| Nprl2         | chr9:107542208-107545704  | 18.9148  | 22.6259 | 0.2585  | 0.164816 |
| Ndufa1        | chrX:37187587-37191163    | 53.6594  | 71.9302 | 0.4228  | 0.373320 |
| Slc35b2       | chr17:45563963-45567669   | 13.6499  | 16.2705 | 0.2534  | 0.193825 |
| Abcf3         | chr16:20548576-20561379   | 26.1849  | 23.3173 | -0.1673 | 0.311331 |
| C030005K06Rik | chr18:50042729-50053844   | 1.8642   | 2.7205  | 0.5453  | 0.274014 |
| Srxn1         | chr2:152105515-152111376  | 2.3131   | 3.1555  | 0.4480  | 0.129235 |
| 6430550D23Rik | chr2:155973278-156007977  | 4.3118   | 3.3888  | -0.3475 | 0.367570 |
| Rrnad1        | chr3:87922600-87930717    | 19.3618  | 17.5373 | -0.1428 | 0.199732 |
| Bcl10         | chr3:145924377-145934283  | 29.4742  | 34.6201 | 0.2322  | 0.245808 |
| Phf13         | chr4:151989632-151996258  | 4.1032   | 3.1648  | -0.3746 | 0.239458 |
| Gm15943       | chr15:58214474-58324053   | 0.1733   | 0.4839  | 1.4811  | 0.159887 |
| Snord45b      | chr3:153910562-153910633  | 6.0150   | 18.9359 | 1.6545  | 0.197410 |
| Chordc1       | chr9:18292266-18314000    | 62.2099  | 55.4026 | -0.1672 | 0.403870 |
| Hspe1-ps5     | chr2:72955897-72956194    | 9.7214   | 4.7153  | -1.0438 | 0.117835 |
| Prnp          | chr2:131909927-131938429  | 13.5982  | 16.1851 | 0.2513  | 0.181910 |
| Letm1         | chr5:33739672-33782817    | 9.8918   | 8.9706  | -0.1410 | 0.114480 |
| Gm17106       | chr16:32985853-33108601   | 18.3744  | 13.1277 | -0.4851 | 0.271512 |
| Rasl11b       | chr5:74195295-74199478    | 1.7129   | 1.0279  | -0.7367 | 0.095347 |
| Trav8n-2      | chr14:53345960-53346420   | 4.6037   | 1.8020  | -1.3532 | 0.147212 |
| Pbk           | chr14:65805836-65817822   | 5.6711   | 7.4285  | 0.3894  | 0.158612 |
| Gm14382       | chr7:100624517-100624954  | 3.6161   | 1.0936  | -1.7253 | 0.448684 |
| Pthr2         | chr11:86683984-86692457   | 8.2046   | 10.4110 | 0.3436  | 0.330528 |
| Cox16         | chr12:81359025-81485127   | 8.3665   | 10.4718 | 0.3238  | 0.401071 |
| Traip         | chr9:107950962-107972268  | 2.7987   | 3.8174  | 0.4478  | 0.284906 |
| Rps24-ps3     | chrX:79195046-79195448    | 56.3705  | 70.3969 | 0.3206  | 0.272985 |
| Gm16006       | chr15:57708113-57708927   | 3.5369   | 1.7411  | -1.0225 | 0.332333 |
| 1700022111Rik | chr4:42969945-42983639    | 9.2484   | 7.9833  | -0.2122 | 0.217612 |
| Col23a1       | chr11:51289919-51583918   | 1.3874   | 1.8806  | 0.4388  | 0.137549 |
| Grsf1         | chr5:88659447-88676171    | 21.4333  | 18.7137 | -0.1958 | 0.324203 |

|               |                           |           |           |         |          |
|---------------|---------------------------|-----------|-----------|---------|----------|
| Fbxo34        | chr14:47472560-47531962   | 4.7081    | 3.6170    | -0.3804 | 0.389625 |
| Baiap2        | chr11:119942762-120006782 | 5.7648    | 4.8562    | -0.2474 | 0.261437 |
| Erbp2ip       | chr13:103818786-103920514 | 87.7895   | 96.2862   | 0.1333  | 0.104151 |
| Cul4b         | chrX:38533273-38576196    | 20.1811   | 23.6653   | 0.2298  | 0.311707 |
| Gm16333       | chr4:152410799-152411262  | 5.4392    | 1.8099    | -1.5875 | 0.412755 |
| Mff           | chr1:82724889-82752394    | 18.6397   | 21.5202   | 0.2073  | 0.237238 |
| Inpp5a        | chr7:139389108-139579652  | 3.2918    | 4.2666    | 0.3742  | 0.209067 |
| Slc38a9       | chr13:112660765-112738743 | 4.2405    | 5.0540    | 0.2532  | 0.259771 |
| Prpf3         | chr8:95830123-95855885    | 11.7952   | 10.3153   | -0.1934 | 0.305040 |
| Setd6         | chr8:95715914-95719010    | 14.1971   | 17.4768   | 0.2998  | 0.278266 |
| Traf1         | chr2:34941749-34961772    | 46.0750   | 51.3133   | 0.1553  | 0.190157 |
| Zfp526        | chr7:25221450-25227507    | 15.0442   | 12.4685   | -0.2709 | 0.435338 |
| Ighv6-3       | chr12:114391711-114392169 | 3.2247    | 0.7990    | -2.0130 | 0.370720 |
| Nol8          | chr13:49653349-49679015   | 31.4677   | 26.2830   | -0.2597 | 0.518232 |
| Abhd11        | chr5:135009151-135012175  | 14.4964   | 12.3229   | -0.2344 | 0.233738 |
| Arf5          | chr6:28423559-28426602    | 82.5368   | 97.1093   | 0.2346  | 0.358507 |
| Tdrp          | chr8:13952008-13975032    | 3.1023    | 2.4084    | -0.3652 | 0.303524 |
| Atad2         | chr15:58094046-58135082   | 31.3600   | 35.1474   | 0.1645  | 0.201811 |
| Snx3          | chr10:42502029-42535381   | 55.8290   | 68.1548   | 0.2878  | 0.407764 |
| Ap2b1         | chr11:83299023-83405035   | 28.8318   | 26.4172   | -0.1262 | 0.324078 |
| 9330151L19Rik | chr12:69197210-69199868   | 8.2518    | 9.9544    | 0.2706  | 0.070117 |
| Pgbd1         | chr13:21421274-21441058   | 0.7855    | 0.4053    | -0.9546 | 0.393218 |
| Zfp951        | chr5:104814342-104828957  | 6.5175    | 4.8138    | -0.4371 | 0.240806 |
| Ube3b         | chr5:114380627-114421168  | 22.8737   | 20.3503   | -0.1686 | 0.369016 |
| Tmem120b      | chr5:123068414-123117749  | 5.8747    | 4.5697    | -0.3624 | 0.395986 |
| Zfp93         | chr7:24270419-24276827    | 1.1612    | 2.1555    | 0.8924  | 0.123873 |
| Gpi1          | chr7:34202121-34230289    | 52.6993   | 59.1685   | 0.1670  | 0.299745 |
| Clpb          | chr7:101663632-101790168  | 3.2007    | 3.8767    | 0.2764  | 0.217130 |
| Tspan32       | chr7:143005045-143019644  | 90.2336   | 100.4663  | 0.1550  | 0.192338 |
| Eif4ebp1      | chr8:27260326-27275656    | 4.4780    | 6.4887    | 0.5351  | 0.219200 |
| Gtf2e2        | chr8:33731913-33777173    | 11.9229   | 15.3200   | 0.3617  | 0.363177 |
| Farsa         | chr8:84856988-84869257    | 20.2484   | 18.0931   | -0.1624 | 0.303316 |
| Acd           | chr8:105698158-105701095  | 14.4288   | 11.5541   | -0.3205 | 0.261348 |
| 1810019D21Rik | chr8:106135399-106138525  | 0.8395    | 0.2269    | -1.8876 | 0.194107 |
| Arv1          | chr8:124722138-124734123  | 10.1155   | 7.6799    | -0.3974 | 0.328714 |
| Gm26377       | chr9:78478527-78478635    | 4732.6287 | 5471.0052 | 0.2092  | 0.431559 |
| Rrp9          | chr9:106475962-106485424  | 22.5919   | 19.4856   | -0.2134 | 0.353569 |
| Fbxl2         | chr9:113963636-114046191  | 5.6917    | 4.7488    | -0.2613 | 0.188166 |
| Arhgef6       | chrX:57231484-57338729    | 29.3807   | 32.4934   | 0.1453  | 0.099457 |
| Fam3a         | chrX:74384718-74393272    | 4.5130    | 5.9023    | 0.3872  | 0.196833 |
| Gm17035       | chr15:66929606-66931107   | 19.8029   | 13.6670   | -0.5350 | 0.315531 |
| Gsdmd         | chr15:75862338-75867404   | 49.6004   | 56.4319   | 0.1862  | 0.173375 |
| Fkbp11        | chr15:98724372-98728198   | 1.3086    | 0.4298    | -1.6062 | 0.273684 |
| Gm11100       | chr14:13918443-13949558   | 7.4574    | 9.5772    | 0.3609  | 0.272751 |
| Hacl1         | chr14:31552904-31641286   | 3.5055    | 4.2718    | 0.2852  | 0.068048 |
| Ndufb10       | chr17:24722059-24724478   | 35.2610   | 42.5173   | 0.2700  | 0.308823 |
| C2            | chr17:34856411-34898265   | 0.8837    | 0.5657    | -0.6434 | 0.220938 |
| Ddah2         | chr17:35059034-35062095   | 1.0196    | 1.7646    | 0.7913  | 0.112011 |
| Gtf2f1        | chr17:57003404-57011288   | 55.4218   | 63.0402   | 0.1858  | 0.193952 |
| Ankrd12       | chr17:65967500-66077089   | 19.1086   | 21.5077   | 0.1706  | 0.285673 |
| Strn          | chr17:78649912-78737196   | 14.2955   | 16.3496   | 0.1937  | 0.283021 |
| Gm9968        | chr16:43345886-43363666   | 2.1749    | 1.3888    | -0.6471 | 0.365026 |
| NA            | chr16:49913192-49915008   | 10.1876   | 8.2777    | -0.2995 | 0.183472 |
| Ehbp1l1       | chr19:5707375-5726317     | 17.4409   | 19.7546   | 0.1797  | 0.202465 |
| Tjp2          | chr19:24094522-24225026   | 12.5198   | 15.2110   | 0.2809  | 0.414928 |
| Mcmcdc2       | chr1:9908637-9942085      | 1.9843    | 1.5308    | -0.3743 | 0.140938 |
| Abcb6         | chr1:75171716-75180392    | 2.0139    | 1.4079    | -0.5165 | 0.426733 |
| Hjurp         | chr1:88262470-88277633    | 36.9523   | 41.0526   | 0.1518  | 0.196712 |
| Rab29         | chr1:131867223-131872887  | 16.7415   | 20.7655   | 0.3108  | 0.284265 |
| A430106G13Rik | chr1:137966530-137969918  | 0.5408    | 0.1940    | -1.4793 | 0.243356 |
| Gm6225        | chr18:3336415-3366863     | 2.8359    | 1.6253    | -0.8031 | 0.355870 |
| Rabgap1       | chr2:37443278-37566454    | 15.0119   | 13.5343   | -0.1495 | 0.256542 |
| Ttc21b        | chr2:66184326-66256617    | 3.6543    | 4.3455    | 0.2499  | 0.189122 |
| Gm10804       | chr2:93452818-93469871    | 2.5658    | 3.3690    | 0.3929  | 0.092668 |
| Rrbp1         | chr2:143947394-144011263  | 13.0690   | 11.6689   | -0.1635 | 0.335391 |
| Apmap         | chr2:150583079-150608567  | 13.1729   | 16.0187   | 0.2822  | 0.283248 |
| Dnttip1       | chr2:164745982-164768607  | 14.3317   | 12.1059   | -0.2435 | 0.225794 |
| 3110057O12Rik | chr3:40846969-40938138    | 2.2566    | 2.9725    | 0.3975  | 0.270130 |
| Rfxap         | chr3:54803114-54807791    | 7.6147    | 9.6449    | 0.3410  | 0.222325 |
| Mab21l2       | chr3:86545580-86548283    | 3.6799    | 2.5320    | -0.5394 | 0.412188 |
| Rnf38         | chr4:44126209-44233789    | 15.6654   | 14.0570   | -0.1563 | 0.346060 |

|               |                           |         |         |         |          |
|---------------|---------------------------|---------|---------|---------|----------|
| Nipsnap3b     | chr4:53011879-53022060    | 19.8025 | 16.6721 | -0.2482 | 0.277009 |
| Btf3l4        | chr4:108814294-108833614  | 2.0021  | 2.6693  | 0.4149  | 0.232521 |
| Btbd19        | chr4:117119218-117125725  | 8.9609  | 10.7717 | 0.2655  | 0.218941 |
| Gm13063       | chr4:132048177-132048961  | 2.5831  | 1.2035  | -1.1018 | 0.332343 |
| ld3           | chr4:136143496-136145755  | 24.8457 | 29.6973 | 0.2573  | 0.326346 |
| Dnajc16       | chr4:141760188-141790931  | 5.8743  | 5.0213  | -0.2264 | 0.279045 |
| Angptl7       | chr4:148495182-148500460  | 0.5113  | 0.9906  | 0.9541  | 0.346244 |
| Hal           | chr10:93488767-93519304   | 0.2889  | 0.1464  | -0.9802 | 0.128558 |
| Fscn1         | chr5:142960342-142973185  | 0.1206  | 0.4488  | 1.8957  | 0.223235 |
| Alpk2         | chr18:65265528-65393888   | 0.0495  | 0.1823  | 1.8815  | 0.210832 |
| Nfic          | chr10:81396185-81431005   | 1.5895  | 1.0938  | -0.5392 | 0.445228 |
| Zfp867        | chr11:59461196-59472474   | 4.8366  | 6.1286  | 0.3416  | 0.335707 |
| Smurf2        | chr11:106820065-106920715 | 17.9748 | 15.7431 | -0.1913 | 0.438606 |
| Rbm25         | chr12:83631235-83683123   | 27.3883 | 25.0897 | -0.1265 | 0.365758 |
| Golga5        | chr12:102469133-102497902 | 30.5303 | 34.4601 | 0.1747  | 0.108818 |
| D430019H16Rik | chr12:105453855-105493095 | 1.7510  | 2.5000  | 0.5138  | 0.394630 |
| Zkscan3       | chr13:21387012-21402755   | 16.4673 | 14.7408 | -0.1598 | 0.344733 |
| Rbks          | chr5:31624438-31697627    | 6.0185  | 4.4359  | -0.4402 | 0.171104 |
| Gm16121       | chr5:140101198-140107591  | 1.4910  | 0.7513  | -0.9889 | 0.356632 |
| Mkln1os       | chr6:31366884-31398773    | 0.8540  | 0.3460  | -1.3034 | 0.339057 |
| Zfp780b       | chr7:27962707-27975368    | 6.6034  | 5.1240  | -0.3659 | 0.429090 |
| Gm16171       | chr7:80907824-80908148    | 4.0694  | 1.2889  | -1.6587 | 0.265598 |
| Zfp764        | chr7:127403667-127406822  | 5.2784  | 6.7809  | 0.3614  | 0.296961 |
| Cyp4v3        | chr8:45269670-45333216    | 4.1200  | 4.9721  | 0.2712  | 0.184450 |
| Cwf19l2       | chr9:3404084-3479236      | 14.3481 | 16.4848 | 0.2003  | 0.124143 |
| Mrps22        | chr9:98588732-98601679    | 26.6363 | 22.9065 | -0.2176 | 0.131242 |
| Acpp          | chr9:104288250-104337728  | 0.6996  | 0.4899  | -0.5139 | 0.056555 |
| Nr4a1         | chr15:101266845-101274792 | 34.4485 | 30.1346 | -0.1930 | 0.390476 |
| Oxsm          | chr14:16238655-16249808   | 6.0121  | 7.1662  | 0.2533  | 0.091366 |
| Fbxl3         | chr14:103080238-103099566 | 31.5086 | 35.2469 | 0.1618  | 0.169497 |
| Vars2         | chr17:35655633-35667592   | 9.0707  | 7.6946  | -0.2374 | 0.388598 |
| Bfar          | chr16:13671857-13703612   | 18.8475 | 16.7018 | -0.1744 | 0.321694 |
| Wdr53         | chr16:32247226-32257083   | 5.4809  | 7.5965  | 0.4709  | 0.283833 |
| Gm21987       | chr16:38347039-38362297   | 28.9104 | 37.0827 | 0.3592  | 0.211079 |
| Gabpa         | chr16:84834924-84863779   | 23.0007 | 26.3993 | 0.1988  | 0.317774 |
| Bace2         | chr16:97356727-97439012   | 0.2781  | 0.6683  | 1.2649  | 0.333888 |
| Nek7          | chr1:138484713-138619696  | 61.7582 | 68.3592 | 0.1465  | 0.089702 |
| Suco          | chr1:161816111-161876661  | 23.9169 | 27.1144 | 0.1810  | 0.256691 |
| Pou2f1        | chr1:165865153-166002678  | 9.6664  | 8.6308  | -0.1635 | 0.403937 |
| Ttn           | chr2:76703979-76982547    | 8.4160  | 11.6916 | 0.4743  | 0.327025 |
| Mrpl20        | chr4:155803535-155809776  | 28.2692 | 34.8478 | 0.3018  | 0.378013 |
| Gm24860       | chr9:111244591-111244867  | 4.3060  | 1.1176  | -1.9460 | 0.299796 |
| Traj25        | chr14:54194814-54194871   | 62.7429 | 30.1421 | -1.0577 | 0.383087 |
| Cd79a         | chr7:24897380-24902197    | 1.3322  | 2.4646  | 0.8876  | 0.263236 |
| Chchd2        | chr5:129881155-129887470  | 22.3230 | 27.7229 | 0.3125  | 0.440248 |
| 2010107G23Rik | chr10:62107654-62143920   | 1.6864  | 0.9891  | -0.7698 | 0.357602 |
| Unc119        | chr11:78343481-78349164   | 14.2714 | 17.4156 | 0.2873  | 0.341047 |
| Zfyve26       | chr12:79232346-79296282   | 9.4139  | 8.1909  | -0.2008 | 0.401636 |
| Hilpda        | chr6:29272487-29275446    | 6.0806  | 8.2537  | 0.4408  | 0.118844 |
| Dync1li2      | chr8:104417673-104443047  | 18.2244 | 16.1456 | -0.1747 | 0.341219 |
| Copb2         | chr9:98563730-98588375    | 71.8662 | 81.6232 | 0.1837  | 0.322985 |
| Cers5         | chr15:99733505-99772885   | 20.0704 | 22.5519 | 0.1682  | 0.123877 |
| Skiv2l        | chr17:34839227-34850210   | 34.6530 | 31.2109 | -0.1509 | 0.392506 |
| Wdr43         | chr17:71616214-71659031   | 71.7012 | 64.4814 | -0.1531 | 0.435954 |
| Tns1          | chr1:73910230-74124447    | 4.6895  | 3.9915  | -0.2325 | 0.341176 |
| 9230111E07Rik | chr2:167782052-167783486  | 6.4371  | 4.1973  | -0.6170 | 0.211210 |
| Mcm9          | chr10:53536328-53630439   | 8.0863  | 10.1954 | 0.3344  | 0.370807 |
| Llph          | chr10:120227069-120232071 | 8.1918  | 6.2699  | -0.3857 | 0.226165 |
| Kcnmb1        | chr11:33963012-33973641   | 1.0834  | 0.6414  | -0.7563 | 0.464577 |
| Fam71b        | chr11:46396558-46407982   | 0.7701  | 0.2992  | -1.3640 | 0.330773 |
| Rad51d        | chr11:82876433-82890614   | 11.7213 | 10.3104 | -0.1850 | 0.124236 |
| Vipas39       | chr12:87238874-87266286   | 20.3074 | 23.3018 | 0.1984  | 0.127756 |
| Snw1          | chr12:87449935-87472299   | 89.7853 | 99.0566 | 0.1418  | 0.056034 |
| Tom7          | chr5:23838943-23844161    | 35.9063 | 45.9251 | 0.3550  | 0.461677 |
| Cdc7          | chr5:106964321-106984432  | 16.2393 | 13.9770 | -0.2164 | 0.401969 |
| Gatsl2        | chr5:134099710-134144343  | 1.8839  | 1.4548  | -0.3729 | 0.300076 |
| BC035044      | chr6:128848043-128891126  | 3.7071  | 2.8295  | -0.3898 | 0.153191 |
| Gm16187       | chr6:129005623-129007961  | 12.7180 | 6.1102  | -1.0576 | 0.352126 |
| Gm26522       | chr7:88278786-88283529    | 1.1438  | 1.9498  | 0.7695  | 0.233502 |
| Stim1         | chr7:102267823-102436848  | 26.1874 | 29.4025 | 0.1671  | 0.102179 |
| Gvin1         | chr7:106156534-106215340  | 1.3953  | 1.7844  | 0.3548  | 0.226986 |

|               |                           |          |          |         |          |
|---------------|---------------------------|----------|----------|---------|----------|
| ltpr3os       | chr17:27099657-27101440   | 10.4725  | 8.0191   | -0.3851 | 0.007713 |
| Gm9843        | chr16:76403208-76403712   | 8.4439   | 12.5316  | 0.5696  | 0.250674 |
| Dpp3          | chr19:4907228-4928287     | 45.6304  | 41.3914  | -0.1407 | 0.260032 |
| Nfkb2         | chr19:46304736-46312090   | 40.9607  | 46.4431  | 0.1812  | 0.280070 |
| Ndufs1        | chr1:63143595-63176822    | 29.7098  | 34.6969  | 0.2239  | 0.368379 |
| Nup160        | chr2:90677214-90736328    | 9.2033   | 8.1841   | -0.1693 | 0.299648 |
| Gm14420       | chr2:177464732-177478129  | 0.5038   | 1.0587   | 1.0714  | 0.100165 |
| Pex11b        | chr3:96635375-96653101    | 3.2583   | 3.9784   | 0.2881  | 0.091934 |
| 5830415F09Rik | chr4:46376504-46389437    | 9.6199   | 8.0248   | -0.2616 | 0.129805 |
| Ddi2          | chr4:141677548-141723419  | 20.7140  | 18.8125  | -0.1389 | 0.342340 |
| Gm15445       | chr1:135152962-135153806  | 3.4009   | 1.3162   | -1.3696 | 0.351693 |
| Rdh11         | chr12:79174336-79192293   | 14.1717  | 12.4556  | -0.1862 | 0.192944 |
| Brd9          | chr13:73937837-73960894   | 38.4649  | 34.7259  | -0.1475 | 0.210702 |
| Prg4          | chr1:150449411-150466165  | 5.5223   | 4.5572   | -0.2771 | 0.252491 |
| Smg5          | chr3:88336259-88362337    | 43.7096  | 39.5116  | -0.1457 | 0.404602 |
| Gm15441       | chr3:96555764-96566801    | 67.6331  | 75.8467  | 0.1654  | 0.121383 |
| Rgp1          | chr4:43578714-43587487    | 9.5325   | 8.5424   | -0.1582 | 0.070520 |
| Rev3l         | chr10:39732117-39875211   | 14.0633  | 12.6448  | -0.1534 | 0.394920 |
| Abca7         | chr10:79996493-80015572   | 30.6628  | 27.1273  | -0.1767 | 0.493559 |
| Ppap2c        | chr10:79526429-79533787   | 2.3638   | 1.5085   | -0.6480 | 0.250433 |
| Btg1          | chr10:96617000-96622813   | 101.2283 | 113.3834 | 0.1636  | 0.333143 |
| Gm11574       | chr11:97048690-97051432   | 16.1878  | 12.9945  | -0.3170 | 0.192879 |
| Mical3        | chr6:121007240-121081609  | 3.5942   | 2.6132   | -0.4598 | 0.409470 |
| Golt1b        | chr6:142387220-142403858  | 15.2227  | 17.8950  | 0.2333  | 0.231567 |
| Egln2         | chr7:27158657-27166802    | 18.0129  | 21.2167  | 0.2362  | 0.324406 |
| Orai3         | chr7:127769814-127775150  | 12.3572  | 14.9173  | 0.2716  | 0.236927 |
| Rprl3         | chr8:3803068-3803358      | 4.0180   | 1.7265   | -1.2186 | 0.211896 |
| Bbx           | chr16:50191843-50432390   | 10.6946  | 9.6565   | -0.1473 | 0.328884 |
| Efhc1         | chr1:20951625-20990838    | 0.5693   | 1.0876   | 0.9339  | 0.341244 |
| Ncoa5         | chr2:165000356-165034867  | 13.2330  | 11.4046  | -0.2145 | 0.390486 |
| Fdxr          | chr11:115268023-115277050 | 12.5785  | 14.7530  | 0.2300  | 0.153106 |
| Preb          | chr5:30950852-30960330    | 14.6457  | 13.2307  | -0.1466 | 0.258498 |
| Rpl9          | chr5:65388363-65391443    | 13.1149  | 11.2810  | -0.2173 | 0.260456 |
| Ercc2         | chr7:19382009-19395694    | 16.5889  | 14.6142  | -0.1829 | 0.341030 |
| Gm12758       | chr7:34234376-34240207    | 6.5138   | 5.3983   | -0.2710 | 0.324077 |
| Palb2         | chr7:122107261-122132946  | 2.6898   | 2.1342   | -0.3338 | 0.235514 |
| Hgsnat        | chr8:25944458-25976744    | 12.2710  | 14.3689  | 0.2277  | 0.100117 |
| lrak1bp1      | chr9:82829805-82847688    | 0.8623   | 1.5157   | 0.8138  | 0.233205 |
| Ftsj1         | chrX:8238667-8252406      | 3.3310   | 2.6485   | -0.3308 | 0.246749 |
| Gm3636        | chr14:6735684-6875155     | 2.8707   | 4.0184   | 0.4852  | 0.181183 |
| Ager          | chr17:34597861-34600934   | 2.3124   | 1.5145   | -0.6105 | 0.203442 |
| NA            | chr17:34996735-35000958   | 53.7085  | 59.3383  | 0.1438  | 0.085868 |
| Dnase1        | chr16:4036941-4040024     | 5.9710   | 4.8512   | -0.2996 | 0.199513 |
| Rttn          | chr18:88971789-89131013   | 5.2502   | 6.0712   | 0.2096  | 0.045098 |
| mt-Rnr1       | chrM:69-1024              | 811.1623 | 578.6817 | -0.4872 | 0.334348 |
| Adh5          | chr3:138443092-138455499  | 30.7180  | 35.7162  | 0.2175  | 0.315374 |
| Usp48         | chr4:137593754-137658537  | 18.9179  | 17.3821  | -0.1222 | 0.203422 |
| Dusp9         | chrX:73639418-73643514    | 0.2465   | 0.5888   | 1.2561  | 0.167430 |
| Plekhg6       | chr6:125362659-125380793  | 0.4590   | 0.1612   | -1.5093 | 0.460648 |
| Emilin1       | chr5:30913401-30921278    | 1.4059   | 0.9903   | -0.5056 | 0.317182 |
| Slc25a17      | chr15:81318920-81360765   | 23.3780  | 27.3752  | 0.2277  | 0.189907 |
| Tyms          | chr5:30058201-30073617    | 6.2958   | 7.4737   | 0.2474  | 0.274132 |
| Mir3101       | chr7:27176005-27176093    | 11.9028  | 25.9442  | 1.1241  | 0.265093 |
| 9030407P20Rik | chr7:120673438-120677560  | 1.4558   | 2.2512   | 0.6289  | 0.277631 |
| Pttg1ip       | chr10:77581719-77598732   | 18.2366  | 21.1821  | 0.2160  | 0.299839 |
| Bcl2l15       | chr3:103832600-103854618  | 0.4763   | 0.9287   | 0.9633  | 0.187877 |
| C130046K22Rik | chr11:103697723-103722832 | 2.2808   | 0.8288   | -1.4605 | 0.251614 |
| Trim23        | chr13:104178796-104203372 | 6.8433   | 8.5603   | 0.3230  | 0.372161 |
| Wdr24         | chr17:25823626-25828730   | 13.7691  | 16.0847  | 0.2243  | 0.244502 |
| Naa25         | chr5:121397935-121444378  | 12.0919  | 10.8098  | -0.1617 | 0.283980 |
| Zfp933        | chr4:147822985-147848366  | 10.0561  | 8.5566   | -0.2330 | 0.330247 |
| Crabp2        | chr3:87948665-87953376    | 1.8157   | 0.6764   | -1.4246 | 0.252071 |
| Nfe2l3        | chr6:51432669-51458768    | 7.2428   | 6.1193   | -0.2432 | 0.060482 |
| BC049715      | chr6:136828842-136840536  | 3.6165   | 1.8107   | -0.9980 | 0.334692 |
| Mex3b         | chr7:82867332-82871563    | 7.7816   | 6.4473   | -0.2714 | 0.289162 |
| Smpd5         | chr15:76294433-76296896   | 5.3678   | 7.0314   | 0.3895  | 0.275168 |
| Ercc3         | chr18:32240299-32270151   | 20.4336  | 18.1567  | -0.1704 | 0.191591 |
| Fap           | chr2:62500942-62574075    | 0.4097   | 0.2282   | -0.8443 | 0.226349 |
| Scyl2         | chr10:89638720-89686285   | 11.5650  | 10.4156  | -0.1510 | 0.316079 |
| 2210015D19Rik | chr11:5762128-5784710     | 2.9367   | 3.9037   | 0.4106  | 0.267625 |
| Kcnab3        | chr11:69326257-69333042   | 0.3100   | 0.7113   | 1.1982  | 0.257703 |



|               |                           |           |           |         |          |
|---------------|---------------------------|-----------|-----------|---------|----------|
| Mtr           | chr13:12186541-12258113   | 15.2702   | 13.4621   | -0.1818 | 0.285477 |
| Rchy1         | chr5:91948903-91963068    | 18.1177   | 15.9485   | -0.1840 | 0.270288 |
| Ryr1          | chr7:29003339-29125151    | 0.1012    | 0.0490    | -1.0457 | 0.159131 |
| Uba2          | chr7:34140688-34169599    | 47.4112   | 54.0556   | 0.1892  | 0.350595 |
| Mcee          | chr7:64392644-64412121    | 3.6587    | 6.0951    | 0.7363  | 0.283232 |
| Pde8a         | chr7:81213595-81334533    | 2.9025    | 4.0239    | 0.4713  | 0.329890 |
| Aldoa         | chr7:126795233-126800751  | 130.7736  | 150.3115  | 0.2009  | 0.467395 |
| Setd1a        | chr7:127776669-127800122  | 6.0068    | 5.2690    | -0.1891 | 0.139453 |
| Tnks          | chr8:34829178-34965690    | 9.1579    | 7.8944    | -0.2142 | 0.416454 |
| 2310045N01Rik | chr8:70139498-70167488    | 15.3235   | 12.8908   | -0.2494 | 0.440806 |
| Cyba          | chr8:122424771-122432940  | 178.5422  | 205.6898  | 0.2042  | 0.397949 |
| Pgm3          | chr9:86552475-86571842    | 9.4548    | 8.1908    | -0.2071 | 0.317044 |
| 1700123O20Rik | chr14:54686170-54690742   | 22.6305   | 26.6484   | 0.2358  | 0.225269 |
| 3110052M02Rik | chr17:21657581-21662540   | 7.2325    | 5.3964    | -0.4225 | 0.263304 |
| Mmp25         | chr17:23629457-23645269   | 0.1818    | 0.4136    | 1.1856  | 0.268359 |
| Gm14021       | chr2:121700764-121701725  | 2.2178    | 1.0723    | -1.0484 | 0.260005 |
| Cog6          | chr3:52982122-53017223    | 13.4030   | 16.3262   | 0.2846  | 0.341864 |
| Selt          | chr3:58576635-58593133    | 26.7181   | 30.6430   | 0.1977  | 0.280561 |
| Srsf4         | chr4:131873616-131901706  | 22.6283   | 19.9921   | -0.1787 | 0.345458 |
| Chrm3         | chr13:9877228-9878998     | 0.3017    | 0.8907    | 1.5619  | 0.383202 |
| Arpc1b        | chr5:145114214-145130705  | 66.1772   | 73.4225   | 0.1499  | 0.255966 |
| Taok2         | chr7:126865677-126884703  | 15.3911   | 13.6302   | -0.1753 | 0.444034 |
| Rcc1          | chr4:132331918-132353605  | 10.4467   | 12.6539   | 0.2765  | 0.306059 |
| Bmp7          | chr2:172868011-172940321  | 4.4448    | 5.6953    | 0.3577  | 0.432310 |
| Zfp655        | chr5:145231722-145247302  | 17.9535   | 15.7939   | -0.1849 | 0.379623 |
| Vdac2         | chr14:21831268-21845879   | 33.1279   | 29.9682   | -0.1446 | 0.359787 |
| Selk          | chr14:29968307-29975074   | 22.8636   | 18.8465   | -0.2788 | 0.351042 |
| Sf1           | chr19:6363689-6378030     | 37.6079   | 34.1178   | -0.1405 | 0.408019 |
| Tiprl         | chr1:165214921-165236943  | 17.6997   | 21.4129   | 0.2748  | 0.284736 |
| Trmt13        | chr3:116581092-116614587  | 9.0464    | 7.7852    | -0.2166 | 0.342531 |
| Espn          | chr4:152120330-152152371  | 3.3320    | 2.6884    | -0.3096 | 0.304890 |
| Abi3bp        | chr16:56477845-56690128   | 0.2103    | 0.4994    | 1.2474  | 0.325211 |
| 2610028H24Rik | chr10:76449080-76461110   | 0.3719    | 0.8857    | 1.2517  | 0.146779 |
| Eef1a1        | chr9:78478448-78489151    | 1431.5883 | 1601.4010 | 0.1617  | 0.363650 |
| Cyb561a3      | chr19:10577453-10588548   | 12.4925   | 9.9735    | -0.3249 | 0.257964 |
| 9330160F10Rik | chr11:69057717-69060483   | 5.0513    | 3.8572    | -0.3891 | 0.333393 |
| Mrpl38        | chr11:116131816-116138868 | 10.2998   | 8.7558    | -0.2343 | 0.167375 |
| Atmin         | chr8:116943392-116960445  | 14.0745   | 12.5699   | -0.1631 | 0.217592 |
| 1810009A15Rik | chr19:8888902-8890740     | 59.3510   | 73.6587   | 0.3116  | 0.374577 |
| Gm13008       | chr4:136003565-136010937  | 18.0407   | 23.4778   | 0.3800  | 0.141391 |
| Tnfrsf22      | chr7:143634807-143649661  | 2.7551    | 2.0962    | -0.3944 | 0.289041 |
| Rfx1          | chr8:84066835-84096992    | 18.6307   | 15.4939   | -0.2660 | 0.494953 |
| Fbxl8         | chr8:105264647-105269326  | 6.9436    | 8.9071    | 0.3593  | 0.299837 |
| Gm26778       | chr14:102978219-102982528 | 2.3763    | 3.1733    | 0.4173  | 0.217809 |
| NA            | chr14:102978219-102982528 | 2.3763    | 3.1733    | 0.4173  | 0.217809 |
| Bcl2l1        | chr2:152780667-152831728  | 8.6027    | 10.3736   | 0.2700  | 0.341346 |
| Gm15697       | chr6:38542302-38546074    | 0.1648    | 0.4165    | 1.3378  | 0.126319 |
| Tmem5         | chr10:122078113-122097371 | 2.9854    | 3.9669    | 0.4101  | 0.307527 |
| Mir546        | chr10:126998439-126998560 | 68.4418   | 48.5539   | -0.4953 | 0.362501 |
| Gm12057       | chr11:22758593-22859544   | 3.7032    | 5.0314    | 0.4422  | 0.274934 |
| Chmp6         | chr11:119913440-119919548 | 13.2105   | 15.8588   | 0.2636  | 0.290995 |
| Idi1          | chr13:8885500-8892451     | 0.9838    | 0.5988    | -0.7162 | 0.150172 |
| Tmem161b      | chr13:84222295-84295966   | 8.9122    | 11.5151   | 0.3697  | 0.410841 |
| Lrrc8b        | chr5:105415774-105486189  | 5.9687    | 7.7649    | 0.3796  | 0.357248 |
| Hscb          | chr5:110829069-110839777  | 14.3664   | 18.9013   | 0.3958  | 0.275956 |
| Gm4876        | chr6:17065009-17171833    | 3.0488    | 4.0649    | 0.4150  | 0.355413 |
| Eif3c         | chr7:126546454-126566411  | 129.6106  | 118.1842  | -0.1331 | 0.418931 |
| Dusp7         | chr9:106368631-106375724  | 12.7285   | 10.9894   | -0.2120 | 0.285059 |
| Nkrf          | chrX:36887539-36902899    | 6.5611    | 5.4279    | -0.2735 | 0.233008 |
| Gm10337       | chr15:102503721-102503886 | 15.6396   | 6.8173    | -1.1979 | 0.316607 |
| Glt8d1        | chr14:31001392-31012441   | 6.0264    | 4.8364    | -0.3174 | 0.200602 |
| Gm26916       | chr14:61629483-61630414   | 9.9533    | 6.1908    | -0.6850 | 0.307516 |
| H2-Ab1        | chr17:34263208-34269418   | 4.2559    | 5.8826    | 0.4670  | 0.316037 |
| A1846148      | chr19:7356463-7383026     | 7.3126    | 5.9399    | -0.2999 | 0.346243 |
| Dpcd          | chr19:45560614-45578279   | 11.5002   | 14.3406   | 0.3185  | 0.178785 |
| Ldb1          | chr19:46032592-46045214   | 100.3349  | 92.6604   | -0.1148 | 0.348361 |
| Trub1         | chr19:57452905-57491005   | 4.4915    | 3.6135    | -0.3138 | 0.429731 |
| Cnot11        | chr1:39534991-39546881    | 20.9423   | 18.5530   | -0.1748 | 0.333854 |
| Wac           | chr18:7868831-7973547     | 21.2776   | 19.4790   | -0.1274 | 0.181154 |
| Epg5          | chr18:77938466-78035027   | 11.2060   | 10.1411   | -0.1441 | 0.279109 |
| Gapvd1        | chr2:34676183-34755232    | 26.7578   | 24.8323   | -0.1077 | 0.099066 |

|               |                           |          |          |         |          |
|---------------|---------------------------|----------|----------|---------|----------|
| Cdca7         | chr2:72476158-72486893    | 24.7278  | 21.2023  | -0.2219 | 0.465850 |
| Inafm2        | chr2:118745757-118748810  | 7.5634   | 6.3500   | -0.2523 | 0.223751 |
| Gm14233       | chr2:131298544-131299835  | 12.5057  | 8.5510   | -0.5484 | 0.309795 |
| Pigt          | chr2:164497519-164508301  | 11.4360  | 9.5437   | -0.2610 | 0.481490 |
| Hist2h2ab     | chr3:96219864-96220308    | 11.8332  | 16.7337  | 0.4999  | 0.146917 |
| Mmp28         | chr11:83440767-83463071   | 0.1134   | 0.3147   | 1.4725  | 0.206542 |
| Mirlet7a-1    | chr13:48538178-48538272   | 12.7057  | 3.9732   | -1.6771 | 0.340210 |
| Mitf          | chr6:97807057-98021349    | 0.0345   | 0.1460   | 2.0828  | 0.248545 |
| Gpr56         | chr8:94977108-95014208    | 0.1327   | 0.3777   | 1.5087  | 0.178126 |
| Mir98         | chrX:151913213-151913321  | 11.1884  | 4.0821   | -1.4546 | 0.258613 |
| Rnls          | chr19:33137746-33392295   | 1.2596   | 2.4085   | 0.9352  | 0.140512 |
| Bag2          | chr1:33745483-33757794    | 0.8895   | 1.6345   | 0.8778  | 0.279681 |
| Gm15790       | chr1:129796607-129797858  | 0.3974   | 1.0653   | 1.4227  | 0.232468 |
| Gm11465       | chr2:165880024-165882056  | 0.6873   | 2.3179   | 1.7538  | 0.184989 |
| T2            | chr17:8372395-8422728     | 0.1890   | 0.5174   | 1.4533  | 0.091939 |
| Nktr          | chr9:121719168-121756843  | 28.3503  | 26.3491  | -0.1056 | 0.253417 |
| Pgm1          | chr5:64092935-64128355    | 8.5673   | 10.4966  | 0.2930  | 0.195230 |
| Gm7598        | chrX:38476460-38482486    | 0.4391   | 0.1739   | -1.3366 | 0.163156 |
| Neu1          | chr17:34931252-34935953   | 15.9237  | 18.2222  | 0.1945  | 0.175732 |
| Ccdc112       | chr18:46282150-46311928   | 0.3755   | 0.1202   | -1.6434 | 0.185757 |
| Fam214a       | chr9:74953052-75032468    | 15.9701  | 18.3331  | 0.1991  | 0.229443 |
| Krt17         | chr11:100256216-100261029 | 1.1194   | 0.4759   | -1.2339 | 0.126033 |
| Gm17022       | chr8:13086508-13087430    | 1.1741   | 2.4873   | 0.1830  | 0.157849 |
| Cct5          | chr15:31590799-31601847   | 184.9039 | 166.2999 | -0.1530 | 0.487616 |
| Il2ra         | chr2:11642791-11693191    | 37.7516  | 34.3846  | -0.1348 | 0.313082 |
| Dusp2         | chr2:127336158-127338376  | 61.5940  | 69.7191  | 0.1788  | 0.264499 |
| Gm12230       | chr11:54947434-54947888   | 6.1040   | 3.4948   | -0.8045 | 0.318793 |
| Serpina3h     | chr12:104236241-104253778 | 2.2424   | 1.2955   | -0.7915 | 0.359354 |
| Gdi2          | chr13:3538074-3566261     | 143.2626 | 159.2997 | 0.1531  | 0.258193 |
| Bpgm          | chr6:34476206-34505613    | 8.6235   | 10.1858  | 0.2402  | 0.151395 |
| Shq1          | chr6:100573080-100671157  | 6.4973   | 5.1053   | -0.3478 | 0.322064 |
| Gtf3c1        | chr7:125640954-125707780  | 28.2251  | 25.4717  | -0.1481 | 0.419008 |
| A430078G23Rik | chr8:3353414-3390295      | 29.2961  | 26.1688  | -0.1629 | 0.323520 |
| N4bp1         | chr8:86841138-86885258    | 13.3364  | 15.2311  | 0.1917  | 0.254858 |
| Ncapd3        | chr9:27030174-27095311    | 30.1949  | 28.0084  | -0.1084 | 0.030232 |
| Gm26609       | chr9:62804477-62808234    | 1.2012   | 0.3752   | -1.6789 | 0.187142 |
| Cdc25a        | chr9:109875578-109893888  | 13.8422  | 12.2688  | -0.1741 | 0.193591 |
| Ndufa6        | chr15:82350138-82354291   | 93.3221  | 114.5596 | 0.2958  | 0.429401 |
| Hdac10        | chr15:89123306-89128700   | 16.0608  | 14.0685  | -0.1911 | 0.313075 |
| Rpl15         | chr14:18267822-18271391   | 18.6368  | 15.9910  | -0.2209 | 0.367899 |
| Cnih1         | chr14:46775581-46788411   | 19.2323  | 23.1267  | 0.2660  | 0.315206 |
| Drp1          | chr19:5422804-5424979     | 44.3615  | 51.2937  | 0.2095  | 0.303185 |
| Dock8         | chr19:24999528-25202432   | 69.6385  | 63.8379  | -0.1255 | 0.432331 |
| Hs6st1        | chr1:36068399-36106446    | 6.8607   | 5.8497   | -0.2300 | 0.133955 |
| Clk1          | chr1:58410188-58424066    | 92.1035  | 85.9021  | -0.1006 | 0.262055 |
| Mterf4        | chr1:93299210-93305915    | 5.5841   | 6.5597   | 0.2323  | 0.090117 |
| Farp2         | chr1:93512078-93621976    | 1.6662   | 1.2367   | -0.4300 | 0.208603 |
| Atg4b         | chr1:93751499-93789434    | 11.8344  | 10.5592  | -0.1645 | 0.266865 |
| Gm10125       | chr18:5491502-5593505     | 0.8022   | 0.5455   | -0.5564 | 0.328185 |
| Abl1          | chr2:31688375-31804227    | 9.3782   | 8.4003   | -0.1589 | 0.342934 |
| Med19         | chr2:84678401-84688215    | 18.7721  | 15.9472  | -0.2353 | 0.386140 |
| Chchd5        | chr2:129129699-129134134  | 5.5472   | 7.2514   | 0.3865  | 0.221401 |
| Hs2st1        | chr3:144431102-144570181  | 4.9900   | 4.1263   | -0.2742 | 0.302884 |
| Nol6          | chr4:41114426-41124455    | 14.1655  | 12.5323  | -0.1767 | 0.341148 |
| Fancg         | chr4:43002342-43010506    | 4.4844   | 5.6526   | 0.3340  | 0.230285 |
| Gngt2         | chr11:95837215-95845734   | 5.1335   | 6.6163   | 0.3661  | 0.141389 |
| Cldn25        | chr16:58727909-58734251   | 13.1664  | 15.7224  | 0.2560  | 0.282175 |
| Nipbl         | chr15:8291224-8444463     | 55.5530  | 50.6578  | -0.1331 | 0.429624 |
| Flnb          | chr14:7817956-7951588     | 18.9306  | 21.4637  | 0.1812  | 0.349419 |
| Erlin2        | chr8:27023798-27039433    | 8.6967   | 10.3242  | 0.2475  | 0.291770 |
| Trpv2         | chr11:62574485-62600515   | 23.6800  | 26.8690  | 0.1823  | 0.294263 |
| Cdkn2b        | chr4:89306288-89311032    | 0.6238   | 1.4797   | 1.2461  | 0.283780 |
| Rnf40         | chr7:127588697-127603605  | 45.2296  | 41.0533  | -0.1398 | 0.409087 |
| Gm11693       | chr11:113678529-113679331 | 2.8568   | 1.0033   | -1.5096 | 0.300473 |
| Rffl          | chr11:82802448-82871210   | 7.5464   | 8.9814   | 0.2512  | 0.301605 |
| Nampt         | chr12:32820334-32853369   | 23.6989  | 27.4962  | 0.2144  | 0.411365 |
| Cdkl5         | chrX:160784307-160994702  | 0.5208   | 0.8555   | 0.7162  | 0.154177 |
| Atxn7         | chr14:14012490-14107296   | 16.3024  | 14.6518  | -0.1540 | 0.356757 |
| Gm17210       | chr14:32292923-32294974   | 6.0313   | 3.2024   | -0.9133 | 0.332898 |
| Tbl3          | chr17:24697948-24707660   | 14.2833  | 12.1737  | -0.2306 | 0.489474 |
| Scaf4         | chr16:90228956-90284425   | 11.1732  | 9.6065   | -0.2180 | 0.420843 |

|               |                           |          |          |         |          |
|---------------|---------------------------|----------|----------|---------|----------|
| Stam          | chr2:14074099-14148338    | 7.3935   | 6.4714   | -0.1922 | 0.134330 |
| Rap1gds1      | chr3:138925905-139075199  | 46.6556  | 43.0150  | -0.1172 | 0.191456 |
| Zfp850        | chr7:27988711-28008416    | 7.3211   | 9.5670   | 0.3860  | 0.344853 |
| Mndal         | chr1:173857220-173942491  | 173.0285 | 193.8836 | 0.1642  | 0.323292 |
| Nhlrc3        | chr3:53448587-53463323    | 7.4144   | 6.2747   | -0.2408 | 0.402771 |
| Mrgpre        | chr7:143778364-143784500  | 1.0977   | 1.6363   | 0.5760  | 0.326891 |
| Zfp40         | chr17:23173868-23193252   | 3.7853   | 5.0776   | 0.4237  | 0.327898 |
| Lyrm9         | chr11:78826583-78846870   | 4.0737   | 4.7768   | 0.2297  | 0.168705 |
| Tst           | chr15:78399555-78405859   | 2.4602   | 1.4038   | -0.8094 | 0.218654 |
| Tmem39b       | chr4:129676354-129696838  | 2.3846   | 3.3539   | 0.4921  | 0.238342 |
| Tmem240       | chr4:155734799-155740564  | 1.2069   | 0.8997   | -0.4238 | 0.036012 |
| 2900089D17Rik | chr5:144241689-144256186  | 0.5149   | 0.1722   | -1.5799 | 0.235225 |
| Rad21         | chr15:51962604-51991760   | 52.5007  | 58.4057  | 0.1538  | 0.220940 |
| Cdc40         | chr10:40831625-40883143   | 9.9502   | 11.9687  | 0.2665  | 0.293148 |
| Arid3a        | chr10:79927042-79955018   | 4.9757   | 5.9511   | 0.2582  | 0.226796 |
| Kremen1       | chr11:5191551-5261558     | 6.2565   | 5.4031   | -0.2116 | 0.364323 |
| Zfp62         | chr11:49203291-49218816   | 42.4212  | 38.9727  | -0.1223 | 0.333430 |
| Fmn1          | chr11:103171106-103198901 | 40.8625  | 36.0896  | -0.1792 | 0.509123 |
| Gm11719       | chr11:107330707-107331058 | 9.8456   | 6.2674   | -0.6516 | 0.223564 |
| Trib2         | chr12:15791726-15816877   | 83.3876  | 75.0643  | -0.1517 | 0.476721 |
| Elmo1         | chr13:20090506-20608353   | 17.2624  | 15.4817  | -0.1571 | 0.469808 |
| Kdm1b         | chr13:47043498-47084613   | 14.4964  | 16.4004  | 0.1780  | 0.110431 |
| Cenpk         | chr13:104228954-104249615 | 3.3987   | 5.0187   | 0.5623  | 0.354904 |
| Ppap2a        | chr13:112800893-112867881 | 3.7945   | 5.1821   | 0.4497  | 0.261777 |
| Trbj2-3       | chr6:41543222-41543271    | 98.5787  | 146.0788 | 0.5674  | 0.287423 |
| Asb7          | chr7:66644564-66689596    | 5.6560   | 4.9141   | -0.2028 | 0.175320 |
| AU020206      | chr7:75769761-75782099    | 72.9079  | 88.8549  | 0.2854  | 0.438535 |
| Znrf1         | chr8:111536096-111626030  | 17.4473  | 15.7706  | -0.1458 | 0.338205 |
| Folr4         | chr9:14885813-14903949    | 163.6300 | 184.5362 | 0.1735  | 0.393999 |
| Aagab         | chr9:63602654-63641889    | 23.0769  | 26.1861  | 0.1824  | 0.113401 |
| Ammecr1       | chrX:142851145-142966728  | 3.6323   | 2.9063   | -0.3217 | 0.422519 |
| Haus4         | chr14:54541784-54554361   | 21.0643  | 24.8586  | 0.2389  | 0.256887 |
| Kif13b        | chr14:64652530-64806296   | 17.3915  | 20.3459  | 0.2264  | 0.398586 |
| Rnaset2b      | chr17:6978859-7011299     | 0.4550   | 0.8274   | 0.8627  | 0.182445 |
| Pglyrp2       | chr17:32413099-32424167   | 50.1109  | 56.1097  | 0.1631  | 0.173106 |
| Pbx2          | chr17:34591265-34597400   | 26.1374  | 23.6729  | -0.1429 | 0.271020 |
| Gm15537       | chr16:3927788-3929357     | 3.4160   | 6.1718   | 0.8534  | 0.283562 |
| Snx29         | chr16:11322907-11755472   | 2.7140   | 2.2069   | -0.2984 | 0.250903 |
| Rab1b         | chr19:5099206-5106996     | 54.1623  | 63.0261  | 0.2187  | 0.414950 |
| Bivm          | chr1:44118956-44144770    | 3.0835   | 3.9591   | 0.3606  | 0.295429 |
| Mettl13       | chr1:162532126-162548551  | 3.6992   | 3.2193   | -0.2005 | 0.046149 |
| Pigm          | chr1:172376530-172384099  | 13.2362  | 14.9058  | 0.1714  | 0.190675 |
| Camk1d        | chr2:5293456-5714515      | 6.1042   | 5.2782   | -0.2097 | 0.324064 |
| Hat1          | chr2:71388957-71441622    | 20.1754  | 23.3742  | 0.2123  | 0.273157 |
| Gm14029       | chr2:129182481-129183947  | 3.7254   | 5.4577   | 0.5509  | 0.254418 |
| Npnt          | chr3:132881744-132950291  | 1.0088   | 0.6228   | -0.6958 | 0.367144 |
| Ctbs          | chr3:146450469-146465849  | 4.4767   | 5.7410   | 0.3589  | 0.260024 |
| Nsmaf         | chr4:6396206-6454271      | 37.0636  | 40.9868  | 0.1452  | 0.218820 |
| Slc35e2       | chr4:155601415-155623340  | 14.8479  | 13.5116  | -0.1361 | 0.134032 |
| NA            | chr4:155694341-155696481  | 1.9904   | 3.1166   | 0.6469  | 0.290009 |
| B930041F14Rik | chr4:155694341-155696481  | 1.9886   | 3.1137   | 0.6469  | 0.290009 |
| Ddx11         | chr17:66123519-66152167   | 12.9276  | 11.6278  | -0.1529 | 0.014730 |
| Gm20479       | chr7:27352648-27357419    | 25.3191  | 20.2315  | -0.3236 | 0.202399 |
| Slc30a7       | chr3:115938972-116007406  | 12.6924  | 11.3396  | -0.1626 | 0.400922 |
| AA415398      | chr4:119530307-119539529  | 1.7280   | 1.1507   | -0.5865 | 0.290646 |
| Fam101b       | chr11:76019193-76027782   | 8.9125   | 10.8345  | 0.2817  | 0.333095 |
| Dus4l         | chr12:31640054-31654826   | 5.5669   | 4.2757   | -0.3807 | 0.202397 |
| Tgfb3         | chr12:86056743-86079041   | 0.7645   | 1.1647   | 0.6073  | 0.132511 |
| Ighj4         | chr12:113428513-113428567 | 7.7526   | 21.2848  | 1.4571  | 0.212928 |
| Pop7          | chr5:137501437-137502518  | 11.1893  | 14.9864  | 0.4215  | 0.316557 |
| Gm26699       | chr6:38551530-38554007    | 15.6453  | 13.0854  | -0.2578 | 0.456153 |
| Olfm2         | chr9:20667985-20728219    | 1.1596   | 0.6172   | -0.9098 | 0.169179 |
| Gpkow         | chrX:7697130-7710262      | 10.6884  | 9.2838   | -0.2033 | 0.268273 |
| Fam122b       | chrX:53243414-53269805    | 1.3449   | 1.9634   | 0.5459  | 0.375891 |
| Otub1         | chr19:7198201-7206316     | 32.2499  | 36.4952  | 0.1784  | 0.219001 |
| Ppil4         | chr10:7792890-7823135     | 22.2360  | 20.1556  | -0.1417 | 0.340400 |
| Ikzf4         | chr10:128630842-128645991 | 8.7045   | 7.6402   | -0.1882 | 0.312521 |
| Morc2a        | chr11:3649493-3690477     | 17.7676  | 15.8110  | -0.1683 | 0.404390 |
| Mttr3         | chr11:4480867-4594863     | 59.9274  | 56.0268  | -0.0971 | 0.248731 |
| C1d           | chr11:17257578-17269176   | 8.3711   | 10.2138  | 0.2870  | 0.357712 |
| Ttc1          | chr11:43729511-43748008   | 18.8577  | 22.3527  | 0.2453  | 0.297985 |

|               |                           |          |          |         |          |
|---------------|---------------------------|----------|----------|---------|----------|
| Rnf145        | chr11:44518963-44565520   | 29.7871  | 27.6394  | -0.1080 | 0.214470 |
| Cyb5d1        | chr11:69391924-69395631   | 4.4286   | 5.9355   | 0.4225  | 0.246122 |
| Acap1         | chr11:69881566-69895539   | 87.4596  | 81.1822  | -0.1075 | 0.358421 |
| Pelp1         | chr11:70392882-70410031   | 6.8237   | 5.7771   | -0.2402 | 0.175694 |
| Atp2a3        | chr11:72961168-72993044   | 70.8497  | 64.0554  | -0.1454 | 0.493352 |
| Blmh          | chr11:76924808-76987379   | 17.4246  | 19.6309  | 0.1720  | 0.205567 |
| Stxbp4        | chr11:90476491-90638084   | 0.2253   | 0.3400   | 0.5937  | 0.063955 |
| Nme1          | chr11:93956978-93968521   | 40.7943  | 35.4974  | -0.2007 | 0.493453 |
| Med1          | chr11:98152153-98193293   | 21.6503  | 19.9072  | -0.1211 | 0.316380 |
| Icam2         | chr11:106377655-106388075 | 17.0553  | 14.3839  | -0.2458 | 0.367039 |
| Helz          | chr11:107547929-107693826 | 6.5942   | 5.7739   | -0.1917 | 0.504447 |
| Mif4gd        | chr11:115607917-115612969 | 40.5840  | 46.5949  | 0.1993  | 0.337379 |
| Gm17178       | chr11:120689145-120709447 | 30.7988  | 22.7986  | -0.4339 | 0.398972 |
| Nubpl         | chr12:52097736-52312744   | 1.2465   | 0.8738   | -0.5125 | 0.292131 |
| Rdh12         | chr12:79208913-79222665   | 5.6246   | 4.4678   | -0.3322 | 0.323459 |
| Ddx24         | chr12:103407975-103425867 | 73.1949  | 80.1109  | 0.1303  | 0.045265 |
| Zfp169        | chr13:48487646-48513451   | 6.9440   | 5.8403   | -0.2497 | 0.494920 |
| Zfp369        | chr13:65278813-65304221   | 10.0331  | 8.8291   | -0.1844 | 0.336274 |
| NA            | chr13:67317941-67360605   | 5.2936   | 6.7821   | 0.3575  | 0.408144 |
| Gm26965       | chr13:67491151-67526151   | 14.2331  | 11.8080  | -0.2695 | 0.305274 |
| A530054K11Rik | chr13:67617000-67637791   | 9.8674   | 11.3867  | 0.2066  | 0.226865 |
| Cetn3         | chr13:81783291-81797143   | 38.1065  | 46.0120  | 0.2720  | 0.378161 |
| Gm20379       | chr13:92306088-92306337   | 7.8333   | 3.1604   | -1.3095 | 0.352733 |
| Trmt44        | chr5:35557205-35575070    | 5.5973   | 4.7167   | -0.2470 | 0.208687 |
| D130017N08Rik | chr5:143758324-143767130  | 1.0072   | 0.6475   | -0.6374 | 0.264320 |
| Trbj1-1       | chr6:41533863-41533911    | 55.8340  | 85.5548  | 0.6157  | 0.142128 |
| Mrpl35        | chr6:71813002-71823810    | 8.8345   | 7.3890   | -0.2578 | 0.383273 |
| Wbp1          | chr6:83119043-83121559    | 15.8416  | 18.9063  | 0.2551  | 0.331573 |
| Ankrd53       | chr6:83762643-83768326    | 1.1015   | 0.6022   | -0.8711 | 0.095550 |
| Arl6ip5       | chr6:97210688-97233315    | 73.0657  | 82.0813  | 0.1679  | 0.160566 |
| Setmar        | chr6:108065044-108077122  | 3.2705   | 2.2868   | -0.5162 | 0.300860 |
| Ccdc77        | chr6:120324322-120364374  | 4.9373   | 4.2714   | -0.2090 | 0.224572 |
| Ybx3          | chr6:131364857-131388450  | 49.2540  | 56.0353  | 0.1861  | 0.302738 |
| Ldhd          | chr6:142490248-142507957  | 8.8206   | 7.0206   | -0.3293 | 0.213878 |
| Zfp446        | chr7:12977847-12984340    | 2.1792   | 1.7595   | -0.3086 | 0.097889 |
| Gltscr2       | chr7:15937837-15946108    | 156.9261 | 173.6801 | 0.1463  | 0.240130 |
| Ffar2         | chr7:30818356-30823775    | 0.8016   | 0.3536   | -1.1808 | 0.362652 |
| Gpatch1       | chr7:35276535-35318440    | 5.7399   | 6.9009   | 0.2658  | 0.087248 |
| Z410002F23Rik | chr7:44246721-44262720    | 15.4738  | 14.0132  | -0.1430 | 0.353036 |
| Akt1s1        | chr7:44848990-44855421    | 8.5028   | 7.0152   | -0.2774 | 0.390979 |
| Eftud1        | chr7:82648613-82777852    | 12.8230  | 11.3397  | -0.1774 | 0.247860 |
| Trim12a       | chr7:104299893-104315466  | 19.4990  | 22.2237  | 0.1887  | 0.328280 |
| Rpl27a        | chr7:109519146-109522367  | 23.1823  | 19.7466  | -0.2314 | 0.507752 |
| Tubgcp2       | chr7:139995954-140036350  | 24.0129  | 21.6359  | -0.1504 | 0.241072 |
| Sigirr        | chr7:141091174-141100546  | 48.2236  | 54.6287  | 0.1799  | 0.292011 |
| Camsap3       | chr8:3587449-3609074      | 0.5197   | 0.2924   | -0.8299 | 0.161266 |
| Nek3          | chr8:22128282-22166435    | 4.4002   | 3.3541   | -0.3916 | 0.253568 |
| Rfwd3         | chr8:111270943-111300222  | 12.9484  | 14.7861  | 0.1915  | 0.186573 |
| Zfp426        | chr9:20468548-20492746    | 10.7473  | 12.1728  | 0.1797  | 0.023996 |
| Gm16754       | chr9:21225370-21232639    | 10.6328  | 13.0259  | 0.2929  | 0.286889 |
| Qtrt1         | chr9:21411836-21420277    | 16.7071  | 13.5998  | -0.2969 | 0.424000 |
| Kirrel3       | chr9:34486125-35036716    | 0.8083   | 0.4617   | -0.8077 | 0.376306 |
| Mir135a-1     | chr9:106154123-106154213  | 14.6895  | 5.6695   | -1.3735 | 0.321022 |
| Tusc2         | chr9:107563254-107566108  | 16.9374  | 20.1811  | 0.2528  | 0.231805 |
| Ccr3          | chr9:124021970-124031689  | 3.4231   | 4.6504   | 0.4420  | 0.412620 |
| Il13ra1       | chrX:36112109-36171259    | 0.6996   | 1.2025   | 0.7814  | 0.383676 |
| Haus7         | chrX:73437314-73459044    | 9.9514   | 13.1599  | 0.4032  | 0.375073 |
| Zdhhc15       | chrX:104536968-104671064  | 11.8780  | 13.5474  | 0.1897  | 0.243509 |
| Fbxo4         | chr15:3965444-3979573     | 8.1819   | 9.9305   | 0.2794  | 0.114917 |
| Otulin        | chr15:27605918-27630693   | 41.3968  | 48.2481  | 0.2210  | 0.270529 |
| Stk3          | chr15:34875495-35155806   | 4.5735   | 5.8523   | 0.3557  | 0.302747 |
| Nptxr         | chr15:79786351-79834333   | 2.1153   | 2.6839   | 0.3435  | 0.229100 |
| Mief1         | chr15:80234079-80253366   | 15.1837  | 13.7241  | -0.1458 | 0.237684 |
| Pfkm          | chr15:98092588-98132447   | 7.4859   | 6.3386   | -0.2400 | 0.156418 |
| Nckap5los     | chr15:99427700-99435313   | 1.6681   | 0.9695   | -0.7828 | 0.246523 |
| Exoc5         | chr14:49012145-49066653   | 15.5055  | 14.2277  | -0.1241 | 0.274624 |
| Rabgta        | chr14:55715872-55722257   | 20.1858  | 17.9732  | -0.1675 | 0.239983 |
| Gm16973       | chr14:56696279-56701268   | 9.6478   | 8.1494   | -0.2435 | 0.197005 |
| Phf11c        | chr14:59380832-59395381   | 11.7221  | 13.8896  | 0.2448  | 0.318377 |
| Hmbox1        | chr14:64811600-64949870   | 3.3845   | 2.9269   | -0.2096 | 0.210160 |
| Trim35        | chr14:66297030-66311424   | 26.7192  | 30.1324  | 0.1734  | 0.264813 |

|               |                           |          |          |         |          |
|---------------|---------------------------|----------|----------|---------|----------|
| Dpysl2        | chr14:66802863-66868688   | 25.8732  | 28.7652  | 0.1529  | 0.104179 |
| Kctd4         | chr14:75955002-75965217   | 2.0272   | 1.3337   | -0.6040 | 0.373711 |
| Dock9         | chr14:121542038-121797734 | 8.2595   | 7.2494   | -0.1882 | 0.379741 |
| Tulp4         | chr17:6106436-6251128     | 3.3080   | 2.9292   | -0.1755 | 0.287416 |
| Rab40c        | chr17:25882113-25919727   | 5.0694   | 4.0709   | -0.3165 | 0.254750 |
| Srpk1         | chr17:28587647-28622521   | 38.8175  | 35.8093  | -0.1164 | 0.344767 |
| Gm20540       | chr17:49427937-49429240   | 1.9889   | 0.8689   | -1.1947 | 0.241510 |
| Mllt1         | chr17:56892611-56935388   | 17.2950  | 14.6388  | -0.2406 | 0.493306 |
| Tnfsf9        | chr17:57105384-57107757   | 3.1013   | 2.0003   | -0.6326 | 0.183867 |
| Lbh           | chr17:72918304-72941942   | 111.4660 | 124.6154 | 0.1609  | 0.358936 |
| Alg1          | chr16:5233620-5244912     | 14.7197  | 12.8704  | -0.1937 | 0.260006 |
| Dexi          | chr16:10530206-10543054   | 12.4065  | 10.1760  | -0.2859 | 0.220223 |
| Snora81       | chr16:23110755-23110933   | 146.6935 | 232.3072 | 0.6632  | 0.510899 |
| NA            | chr16:92078061-92083808   | 17.2148  | 13.4405  | -0.3571 | 0.024237 |
| Hlcs          | chr16:94129194-94313563   | 7.4091   | 6.2351   | -0.2489 | 0.451502 |
| Fibp          | chr19:5460606-5465052     | 28.3942  | 33.0789  | 0.2203  | 0.182770 |
| Nudt22        | chr19:6993017-6996117     | 11.4927  | 14.7273  | 0.3578  | 0.326080 |
| Jak2          | chr19:29251827-29313080   | 78.2252  | 85.5000  | 0.1283  | 0.106744 |
| Tm9sf3        | chr19:41210841-41264004   | 80.7676  | 89.6420  | 0.1504  | 0.296599 |
| Fam178a       | chr19:44931118-44983787   | 24.2606  | 22.3954  | -0.1154 | 0.142769 |
| Acsf5         | chr19:55253368-55296627   | 77.7038  | 85.7684  | 0.1425  | 0.197838 |
| Gm7094        | chr1:21272337-21273082    | 1.5543   | 0.4219   | -1.8811 | 0.359277 |
| Gmppa         | chr1:75435929-75443179    | 14.6722  | 17.5886  | 0.2616  | 0.340928 |
| Tmem63a       | chr1:180942343-180975112  | 15.8304  | 13.8588  | -0.1919 | 0.406764 |
| Nek2          | chr1:191821443-191833050  | 6.2660   | 7.6046   | 0.2793  | 0.330648 |
| Bin1          | chr18:32377216-32435736   | 42.4345  | 47.4723  | 0.1618  | 0.171940 |
| Dtwd2         | chr18:49696144-49755601   | 2.9228   | 2.1923   | -0.4149 | 0.302963 |
| Csf1r         | chr18:61105571-61132149   | 2.9236   | 2.3405   | -0.3210 | 0.239970 |
| Pnpla7        | chr2:24976032-25054057    | 12.4509  | 14.0719  | 0.1766  | 0.239431 |
| Agpat2        | chr2:26593056-26604417    | 5.7997   | 7.4744   | 0.3660  | 0.318125 |
| Lrrc8a        | chr2:30237714-30282148    | 13.0084  | 11.6070  | -0.1645 | 0.309305 |
| Ntmt1         | chr2:30807825-30823033    | 7.0504   | 5.7121   | -0.3037 | 0.302287 |
| Gm13609       | chr2:32016643-32017344    | 5.9686   | 3.9608   | -0.5916 | 0.065612 |
| Scal          | chr2:39066213-39190730    | 9.6429   | 8.7818   | -0.1350 | 0.232376 |
| Baz2b         | chr2:59899362-60209839    | 6.2568   | 5.6366   | -0.1506 | 0.362923 |
| Rbms1         | chr2:60750192-60963192    | 17.9856  | 16.2264  | -0.1485 | 0.346091 |
| Fam171b       | chr2:83812635-83883486    | 0.0698   | 0.2002   | 1.5209  | 0.293275 |
| Gm13785       | chr2:92312153-92312843    | 2.3356   | 1.0343   | -1.1751 | 0.143307 |
| Ctdspl2       | chr2:121956000-122013642  | 10.7905  | 12.1762  | 0.1743  | 0.227995 |
| Trmt6         | chr2:132804206-132816055  | 13.8002  | 12.3883  | -0.1557 | 0.292163 |
| Kif16bos      | chr2:142902964-142903572  | 2.2768   | 0.7262   | -1.6485 | 0.260368 |
| Gm20721       | chr2:174330318-174346712  | 175.4315 | 193.5859 | 0.1421  | 0.234679 |
| Gm14410       | chr2:177183452-177206421  | 1.9140   | 2.6407   | 0.4643  | 0.111932 |
| Snx16         | chr3:10417818-10440124    | 2.7098   | 3.7315   | 0.4615  | 0.241773 |
| Intu          | chr3:40531285-40704774    | 0.3193   | 0.1752   | -0.8663 | 0.224501 |
| Slc50a1       | chr3:89268245-89270570    | 48.6582  | 55.2012  | 0.1820  | 0.199194 |
| Polr3gl       | chr3:96577871-96594181    | 11.0228  | 8.6661   | -0.3470 | 0.394719 |
| Casp8ap2      | chr4:32615450-32653265    | 27.1358  | 25.0894  | -0.1131 | 0.182948 |
| Melk          | chr4:44300875-44364675    | 6.2296   | 7.7418   | 0.3135  | 0.341710 |
| Invs          | chr4:48279759-48431954    | 4.3098   | 3.7377   | -0.2055 | 0.410394 |
| Rnf11         | chr4:109451097-109484728  | 9.1383   | 10.5428  | 0.2063  | 0.128697 |
| Ppcs          | chr4:119418529-119422420  | 7.8566   | 10.0148  | 0.3502  | 0.284595 |
| Padi3         | chr4:140785364-140810648  | 0.8313   | 0.4125   | -1.0110 | 0.438905 |
| Rsc1a1        | chr4:141683562-141723419  | 32.8156  | 29.3882  | -0.1591 | 0.406738 |
| Rpl22         | chr4:152325741-152334071  | 68.4212  | 80.7067  | 0.2382  | 0.486421 |
| Rer1          | chr4:155074109-155086382  | 76.6437  | 86.6318  | 0.1767  | 0.278870 |
| Mmp23         | chr4:155650654-155653384  | 0.8176   | 0.4121   | -0.9884 | 0.281865 |
| Rdh9          | chr10:127759786-127792697 | 0.0791   | 0.2578   | 1.7045  | 0.261772 |
| Myh3          | chr11:67078299-67102291   | 0.3419   | 0.6334   | 0.8897  | 0.411650 |
| Gm12305       | chr11:68269557-68270879   | 1.6663   | 3.7638   | 1.1755  | 0.135555 |
| Sfn5os        | chr11:82942340-82960681   | 3.2199   | 6.1213   | 0.9268  | 0.141805 |
| Ccdc176       | chr12:84409070-84433780   | 0.3910   | 0.7928   | 1.0197  | 0.055993 |
| Mblac1        | chr5:138194313-138195621  | 0.3474   | 0.9124   | 1.3929  | 0.146686 |
| M1ap          | chr6:82946901-83030183    | 1.2588   | 0.5828   | -1.1111 | 0.426355 |
| Gm16589       | chr8:4087542-4089900      | 0.7753   | 0.3444   | -1.1705 | 0.345907 |
| BC049352      | chr9:45182006-45250020    | 0.7468   | 1.4452   | 0.9524  | 0.234920 |
| Cacna2d2      | chr9:107399611-107529346  | 0.0918   | 0.2710   | 1.5618  | 0.232712 |
| Trav7-3       | chr14:53443248-53443838   | 1.0118   | 3.4946   | 1.7881  | 0.389197 |
| Phf11d        | chr14:59347406-59365470   | 0.4524   | 0.1733   | -1.3843 | 0.368310 |
| Gm22422       | chr16:56035752-56035887   | 20.5420  | 34.7515  | 0.7585  | 0.360870 |
| A230107N01Rik | chr13:84219580-84222175   | 0.4570   | 0.1699   | -1.4275 | 0.440378 |

|               |                           |          |          |         |          |
|---------------|---------------------------|----------|----------|---------|----------|
| Stap1         | chr5:86071745-86103993    | 21.3403  | 19.0791  | -0.1616 | 0.384740 |
| Smpd4         | chr16:17619353-17644828   | 8.0457   | 6.9737   | -0.2063 | 0.491847 |
| Lrrfip1       | chr1:90998726-91128944    | 61.3916  | 67.1449  | 0.1292  | 0.158892 |
| 3110002H16Rik | chr18:12168716-12189997   | 20.8610  | 18.8712  | -0.1446 | 0.352916 |
| Prdm2         | chr4:143107390-143212995  | 12.6025  | 11.2513  | -0.1636 | 0.393456 |
| Cct8          | chr16:87483325-87495873   | 116.4061 | 102.4353 | -0.1845 | 0.576763 |
| Hspa4         | chr11:53259813-53300457   | 79.4082  | 72.8554  | -0.1243 | 0.425757 |
| Fancm         | chr12:65075605-65132058   | 7.5174   | 6.7049   | -0.1650 | 0.260687 |
| Fastkd3       | chr13:68582247-68592279   | 7.7262   | 9.3067   | 0.2685  | 0.128380 |
| Gm6537        | chr7:28756173-28758965    | 1.0503   | 0.4525   | -1.2149 | 0.192233 |
| Fam105a       | chr15:27655070-27681542   | 48.5780  | 43.6871  | -0.1531 | 0.413831 |
| Ccdc134       | chr15:82127921-82142200   | 15.9487  | 13.7864  | -0.2102 | 0.243076 |
| Hagh          | chr17:24840142-24864450   | 4.9329   | 6.4253   | 0.3813  | 0.200484 |
| Slc23a2       | chr2:132052495-132145108  | 9.9323   | 9.0085   | -0.1408 | 0.187718 |
| Gm21960       | chr3:96412909-96413361    | 2.5359   | 5.2129   | 1.0396  | 0.193823 |
| Tmem69        | chr4:116551632-116555936  | 3.9690   | 5.3405   | 0.4282  | 0.357028 |
| Clcn1         | chr6:42286684-42315756    | 0.0485   | 0.1437   | 1.5656  | 0.058205 |
| Snora73b      | chr4:132352321-132352526  | 509.8738 | 691.6972 | 0.4400  | 0.449330 |
| Der3          | chr10:75893397-75895941   | 0.9188   | 1.8461   | 1.0066  | 0.187106 |
| Cdc42se2      | chr11:54717455-54787675   | 96.4660  | 105.8398 | 0.1338  | 0.196932 |
| Lrrc75a       | chr11:62604883-62648523   | 4.7674   | 6.0906   | 0.3534  | 0.144477 |
| Gm12333       | chr11:75036475-75039348   | 2.1396   | 1.3719   | -0.6411 | 0.496383 |
| Atg2b         | chr12:105613538-105685241 | 13.2497  | 12.2333  | -0.1151 | 0.146365 |
| NA            | chr5:36796227-36797729    | 12.4214  | 9.9874   | -0.3147 | 0.359820 |
| Lyrm5         | chr6:145211133-145216939  | 9.6115   | 11.3811  | 0.2438  | 0.147349 |
| Gm12764       | chr7:34388664-34394779    | 22.1872  | 18.0048  | -0.3013 | 0.191346 |
| Ciapiin1      | chr8:94819817-94838358    | 7.2372   | 8.3606   | 0.2082  | 0.198281 |
| Nbeal2        | chr9:110624788-110654161  | 23.1087  | 20.1374  | -0.1986 | 0.550073 |
| Txlng         | chrX:162778918-162829454  | 5.4923   | 4.7773   | -0.2012 | 0.292122 |
| Ndrgr2        | chr14:51905270-51913488   | 12.5924  | 10.7291  | -0.2310 | 0.246744 |
| Gm27017       | chr14:61648949-61667312   | 5.2058   | 2.7689   | -0.9108 | 0.319333 |
| Gpr180        | chr14:118137126-118164232 | 5.1581   | 6.4960   | 0.3327  | 0.316075 |
| Gfer          | chr17:24693190-24696156   | 14.3814  | 12.1146  | -0.2475 | 0.309993 |
| Cd200         | chr16:45382134-45409053   | 23.7407  | 21.5655  | -0.1386 | 0.202313 |
| Cwf19l1       | chr19:44108643-44135876   | 7.1526   | 8.3983   | 0.2316  | 0.069407 |
| Ier3ip1       | chr18:76930016-76941605   | 17.8076  | 21.5147  | 0.2728  | 0.405706 |
| D330023K18Rik | chr2:31146456-31152291    | 3.7934   | 2.5320   | -0.5832 | 0.306934 |
| Lrsam1        | chr2:32925215-32961614    | 3.4230   | 2.6801   | -0.3529 | 0.445181 |
| Gm9845        | chr3:39357393-39359128    | 0.6460   | 1.1501   | 0.8322  | 0.083554 |
| Cd1d1         | chr3:86995833-86999441    | 12.4101  | 14.7316  | 0.2474  | 0.212136 |
| Gm16740       | chr3:95217456-95226658    | 9.4395   | 7.3614   | -0.3587 | 0.061507 |
| Dcaf12        | chr4:41291299-41314889    | 23.7549  | 21.6536  | -0.1336 | 0.106878 |
| Oma1          | chr4:103313811-103371868  | 15.1549  | 13.2393  | -0.1950 | 0.142405 |
| Gm5778        | chr10:73201694-73202766   | 0.9322   | 0.3062   | -1.6063 | 0.204527 |
| Hist1h2bp     | chr13:21787460-21789213   | 1.0712   | 2.4252   | 1.1789  | 0.231276 |
| Prob1         | chr18:35652166-35655187   | 0.4410   | 0.1586   | -1.4757 | 0.279269 |
| Cdhr3         | chr12:33033795-33092875   | 0.8107   | 0.3806   | -1.0910 | 0.368075 |
| Ezh2          | chr6:47530273-47595341    | 11.8164  | 13.7205  | 0.2155  | 0.333178 |
| Smarce1       | chr11:99209046-99231017   | 10.7924  | 9.6975   | -0.1543 | 0.296904 |
| Acads         | chr5:115110298-115119346  | 14.3192  | 17.1620  | 0.2613  | 0.367746 |
| Gm10390       | chr5:120121102-120139263  | 2.8435   | 2.4389   | -0.2214 | 0.061323 |
| Zfp248        | chr6:118427318-118455528  | 0.6683   | 1.0063   | 0.5904  | 0.141221 |
| Ing2          | chr8:47667177-47675556    | 4.0227   | 5.2342   | 0.3798  | 0.330291 |
| Slain1        | chr14:103650227-103704907 | 24.5683  | 28.0828  | 0.1929  | 0.339622 |
| Tfb1m         | chr17:3519262-3557713     | 9.7994   | 7.6533   | -0.3566 | 0.350949 |
| Rrn3          | chr16:13780698-13814840   | 37.5690  | 32.8192  | -0.1950 | 0.525882 |
| Fam53c        | chr18:34758905-34773760   | 8.2880   | 7.3283   | -0.1776 | 0.058794 |
| Gm13707       | chr2:73421908-73429142    | 4.7937   | 2.9833   | -0.6842 | 0.162356 |
| Rcan3         | chr4:135412307-135433853  | 19.9093  | 18.0753  | -0.1394 | 0.244704 |
| NA            | chr17:32285106-32285177   | 7.9680   | 18.1795  | 1.1900  | 0.450787 |
| 1700120B22Rik | chr10:63243073-63244148   | 22.7805  | 17.6013  | -0.3721 | 0.187877 |
| Fcf1          | chr12:84970896-84983303   | 14.8229  | 18.9187  | 0.3520  | 0.352254 |
| Ccdc91        | chr6:147475870-147632612  | 10.1245  | 8.5929   | -0.2366 | 0.314456 |
| Napsa         | chr7:44572431-44586862    | 0.4263   | 0.9294   | 1.1244  | 0.284715 |
| Prr12         | chr7:45027706-45052881    | 3.6668   | 2.9127   | -0.3322 | 0.524189 |
| Rp9           | chr9:22448310-22468356    | 55.0645  | 48.7907  | -0.1745 | 0.320463 |
| Jade3         | chrX:20425687-20519939    | 4.8877   | 4.0868   | -0.2582 | 0.302585 |
| Kcnk7         | chr19:5704366-5707101     | 1.8991   | 1.1277   | -0.7520 | 0.211161 |
| Kif14         | chr1:136467957-136531511  | 2.0168   | 2.5271   | 0.3254  | 0.382503 |
| Clk2          | chr3:89164794-89176921    | 21.5044  | 19.3496  | -0.1523 | 0.393302 |
| Plekhf2       | chr4:10988661-11007927    | 15.3219  | 17.6198  | 0.2016  | 0.185891 |

|               |                           |          |          |         |          |
|---------------|---------------------------|----------|----------|---------|----------|
| Eml1          | chr12:108370956-108539617 | 0.0454   | 0.1224   | 1.4318  | 0.185676 |
| Gm24846       | chr7:104264682-104264790  | 6.3133   | 14.2058  | 1.1700  | 0.134494 |
| Ms4a6b        | chr19:11516511-11531256   | 268.8864 | 299.4340 | 0.1552  | 0.378490 |
| Ksr2          | chr5:117413999-11775003   | 0.2343   | 0.3613   | 0.6245  | 0.349336 |
| Morn1         | chr4:155086576-155145505  | 1.0779   | 0.5949   | -0.8575 | 0.553924 |
| 4632415L05Rik | chr3:19894885-19895962    | 11.1878  | 8.8457   | -0.3389 | 0.207886 |
| Mrpl1         | chr5:96209492-96266727    | 6.7626   | 8.2143   | 0.2806  | 0.303569 |
| Gm10548       | chr18:34207774-34221772   | 1.3809   | 2.1234   | 0.6208  | 0.318583 |
| Gm15903       | chr5:129727045-129728385  | 6.1331   | 2.4127   | -1.3459 | 0.497040 |
| Snx6          | chr12:54746348-54795703   | 35.3509  | 41.0320  | 0.2150  | 0.348174 |
| Ctnnd1        | chr2:84600070-84650765    | 0.2174   | 0.3997   | 0.8782  | 0.349174 |
| Rufy2         | chr10:62980222-63017210   | 12.0964  | 11.0606  | -0.1292 | 0.189751 |
| Psen1         | chr12:83688202-83735199   | 26.8470  | 30.0382  | 0.1620  | 0.119346 |
| Hnrnpd        | chr5:99958425-99978938    | 17.4692  | 15.3309  | -0.1884 | 0.464008 |
| Scn1b         | chr7:31116524-31126945    | 1.1186   | 0.4175   | -1.4217 | 0.293591 |
| Dscr3         | chr16:94497782-94526830   | 22.7532  | 20.3896  | -0.1582 | 0.351105 |
| Ifit2         | chr19:34550693-34576419   | 22.4785  | 25.5464  | 0.1846  | 0.273382 |
| Lax1          | chr1:133679028-133690108  | 63.1596  | 71.0705  | 0.1702  | 0.315496 |
| Hspa4l        | chr3:40744494-40796103    | 9.9967   | 9.1030   | -0.1351 | 0.345870 |
| Pkn2          | chr3:142790901-142882004  | 25.5737  | 23.6208  | -0.1146 | 0.247687 |
| Mcf2l         | chr8:12873805-13020905    | 0.1745   | 0.0912   | -0.9370 | 0.345103 |
| 9330136K24Rik | chr17:21528193-21535878   | 0.4223   | 1.0021   | 1.2466  | 0.176793 |
| Dzank1        | chr2:144470556-144527414  | 0.2451   | 0.1126   | -1.1216 | 0.334287 |
| Gm17622       | chr13:96490732-96491120   | 5.4490   | 18.1230  | 1.7338  | 0.153450 |
| Fbxw10        | chr11:62847068-62877465   | 1.9050   | 1.2865   | -0.5663 | 0.539879 |
| Rny3          | chr6:47781623-47781725    | 29.9967  | 93.9777  | 1.6475  | 0.433683 |
| NA            | chr7:28399548-28598144    | 4.0001   | 3.2118   | -0.3166 | 0.381729 |
| Vrk3          | chr7:44748412-44777515    | 18.1492  | 16.2208  | -0.1621 | 0.237815 |
| E2f4          | chr8:105297662-105305369  | 30.4208  | 26.8748  | -0.1788 | 0.354481 |
| Rps6kc1       | chr1:190700201-190911770  | 3.1808   | 2.6980   | -0.2375 | 0.369453 |
| Romo1         | chr2:156144038-156145797  | 17.6032  | 23.3155  | 0.4055  | 0.369249 |
| Ndufaf6       | chr4:11051044-11076205    | 3.7969   | 5.5234   | 0.5407  | 0.322222 |
| Tjp3          | chr10:81273206-81291267   | 6.7998   | 8.5067   | 0.3231  | 0.388834 |
| Gm9754        | chr5:118065359-118069710  | 6.4898   | 5.2660   | -0.3015 | 0.367569 |
| Flt3l         | chr7:45131187-45136432    | 21.9469  | 19.4676  | -0.1729 | 0.431330 |
| Zfp646        | chr7:127876795-127885996  | 47.7274  | 43.6737  | -0.1281 | 0.448125 |
| Bud13         | chr9:46283007-46298783    | 5.5151   | 4.5877   | -0.2656 | 0.299421 |
| Gm14379       | chrX:7375924-7378042      | 0.4817   | 0.1604   | -1.5862 | 0.419664 |
| Itgb7         | chr15:102215994-102231935 | 282.7671 | 314.5198 | 0.1535  | 0.370999 |
| Ccdc186       | chr19:56787480-56822190   | 8.7128   | 7.6741   | -0.1831 | 0.384682 |
| Zfp68         | chr5:138604615-138619761  | 23.7888  | 27.4058  | 0.2042  | 0.345207 |
| Map1lc3b      | chr8:121590360-121598760  | 8.3474   | 9.5177   | 0.1893  | 0.257956 |
| Pi4k2a        | chr19:42090434-42122218   | 8.7865   | 7.3765   | -0.2524 | 0.451184 |
| Gm7658        | chr1:21511869-21513127    | 0.3419   | 0.8949   | 1.3880  | 0.156048 |
| Eri1          | chr8:35465264-35495533    | 21.7968  | 24.4573  | 0.1661  | 0.256895 |
| Acmsd         | chr1:127729412-127767564  | 0.6523   | 0.2170   | -1.5882 | 0.402362 |
| Etohi1        | chr2:178023283-178034022  | 11.0948  | 8.9467   | -0.3105 | 0.436715 |
| Cyp2s1        | chr7:25802474-25816913    | 0.8299   | 1.2950   | 0.6421  | 0.384078 |
| Ubtf          | chr11:102304559-102319742 | 50.8664  | 47.4859  | -0.0992 | 0.278546 |
| 2810008D09Rik | chr11:117076789-117078955 | 21.3949  | 18.9268  | -0.1768 | 0.237308 |
| Sf3b5         | chr10:13008449-13009182   | 51.4756  | 60.9030  | 0.2426  | 0.345187 |
| Ntn4          | chr10:93640680-93747207   | 2.1271   | 1.4789   | -0.5243 | 0.420182 |
| Trp53i13      | chr11:77508098-77515980   | 2.5748   | 3.4587   | 0.4258  | 0.119382 |
| E130012A19Rik | chr11:97627392-97629716   | 3.9902   | 2.8341   | -0.4936 | 0.377043 |
| Fbxo24        | chr5:137612502-137629002  | 2.4863   | 1.7437   | -0.5119 | 0.206926 |
| Tbc1d17       | chr7:44840900-44849079    | 15.6635  | 13.8070  | -0.1820 | 0.330657 |
| Gm5901        | chr7:105375097-105378287  | 3.6089   | 2.2774   | -0.6642 | 0.241840 |
| Wdr13         | chrX:8123300-8132892      | 11.6187  | 10.2076  | -0.1868 | 0.418987 |
| Slc52a2       | chr15:76538942-76542130   | 12.9999  | 11.1850  | -0.2169 | 0.331617 |
| Tpr           | chr1:150392837-150449935  | 85.4013  | 79.8202  | -0.0975 | 0.350285 |
| Amy1          | chr3:113555709-113606699  | 2.8021   | 3.6109   | 0.3658  | 0.197154 |
| Lsm7          | chr10:80852824-80855209   | 2.4828   | 5.0053   | 1.0115  | 0.198636 |
| Sardhos       | chr2:27189381-27234710    | 4.6653   | 1.6836   | -1.4704 | 0.228745 |
| Mcoln2        | chr3:146149832-146195513  | 1.0672   | 2.7308   | 1.3555  | 0.172221 |
| Gabbr2        | chr4:33062998-33095865    | 1.2028   | 2.0217   | 0.7492  | 0.324966 |
| Tmem120a      | chr5:135735484-135744271  | 9.7188   | 12.5040  | 0.3635  | 0.385171 |
| Caprin2       | chr6:148842491-148896237  | 1.0419   | 1.4228   | 0.4494  | 0.295581 |
| Kit           | chr5:75574915-75656722    | 0.1693   | 0.3568   | 1.0754  | 0.205165 |
| Wdr66         | chr5:123252101-123327484  | 1.1404   | 0.7294   | -0.6447 | 0.507312 |
| Cab39l        | chr14:59440980-59548903   | 15.3519  | 18.2878  | 0.2525  | 0.372106 |
| Mlxip         | chr5:123394797-123457932  | 8.1113   | 7.0941   | -0.1933 | 0.470732 |

|               |                           |          |          |         |          |
|---------------|---------------------------|----------|----------|---------|----------|
| Apobec3       | chr15:79891658-79915906   | 36.9522  | 41.1242  | 0.1543  | 0.281471 |
| Car14         | chr3:95897767-95904691    | 1.7035   | 1.1885   | -0.5194 | 0.053587 |
| Mlec          | chr5:115142980-115158179  | 79.8551  | 75.1104  | -0.0884 | 0.177112 |
| Tpst1         | chr5:130073325-130135729  | 3.9345   | 5.1114   | 0.3775  | 0.299470 |
| Epm2aip1      | chr9:111271844-111279089  | 16.2602  | 14.8121  | -0.1346 | 0.291822 |
| Ddx43         | chr9:78395776-78423587    | 4.6913   | 6.0302   | 0.3622  | 0.279183 |
| Gm15743       | chr16:31427875-31429776   | 2.5805   | 1.7420   | -0.5669 | 0.336546 |
| Adcy1         | chr11:7063488-7178506     | 0.0308   | 0.0907   | 1.5587  | 0.249010 |
| Mien1         | chr11:98437707-98438991   | 51.2190  | 44.0628  | -0.2171 | 0.371072 |
| Kctd10        | chr5:114363566-114380515  | 25.5863  | 28.2663  | 0.1437  | 0.027607 |
| Ppp5c         | chr7:17004639-17027924    | 25.2636  | 22.6392  | -0.1582 | 0.371096 |
| Zfp36         | chr7:28376783-28379255    | 28.5682  | 33.2047  | 0.2170  | 0.342817 |
| Tbx6          | chr7:126781482-126785560  | 6.8884   | 5.1902   | -0.4084 | 0.402791 |
| Gm16675       | chr8:46730971-46739515    | 5.4728   | 7.2535   | 0.4064  | 0.239631 |
| Prkdc         | chr16:15637865-15842235   | 15.9426  | 14.3520  | -0.1516 | 0.452341 |
| Ctse          | chr1:131638305-131675503  | 6.6543   | 8.3502   | 0.3275  | 0.337084 |
| Fam98b        | chr2:117249738-117271540  | 3.5662   | 2.8650   | -0.3159 | 0.183151 |
| Rraga         | chr4:86575672-86577281    | 10.6274  | 13.3512  | 0.3292  | 0.338773 |
| Sf3b6         | chr12:4817607-4827658     | 65.5668  | 76.6905  | 0.2261  | 0.395975 |
| A630072L19Rik | chr12:100941741-100949875 | 11.1506  | 9.3843   | -0.2488 | 0.450652 |
| Btbd7         | chr12:102784655-102878406 | 17.7213  | 15.6805  | -0.1765 | 0.436692 |
| Xrcc4         | chr13:89774026-90089608   | 6.5543   | 5.6438   | -0.2158 | 0.185889 |
| Sirt4         | chr5:115478009-115484725  | 2.8882   | 2.0019   | -0.5288 | 0.416584 |
| 2310014L17Rik | chr7:12927415-12931072    | 0.2344   | 0.4922   | 1.0702  | 0.292617 |
| Zfp60         | chr7:27731388-27753702    | 4.3616   | 3.7761   | -0.2079 | 0.312060 |
| Ptov1         | chr7:44863067-44869788    | 4.6386   | 3.6494   | -0.3460 | 0.486114 |
| Bag3          | chr7:128523582-128546977  | 2.4407   | 1.7717   | -0.4622 | 0.284250 |
| Saraf         | chr8:34154562-34170845    | 156.5083 | 171.5182 | 0.1321  | 0.220341 |
| Insl3         | chr8:71689213-71690575    | 23.7030  | 29.7882  | 0.3297  | 0.313995 |
| Atg4d         | chr9:21265298-21274368    | 32.0215  | 29.1119  | -0.1374 | 0.228301 |
| Hmgn3         | chr9:83109947-83146685    | 6.1645   | 7.6727   | 0.3158  | 0.103417 |
| Hemk1         | chr9:107327691-107338350  | 4.9350   | 5.9968   | 0.2812  | 0.133520 |
| Slc22a13b-ps  | chr9:119220487-119231692  | 0.1976   | 0.6186   | 1.6466  | 0.345641 |
| Gtf2h5        | chr17:6079785-6086517     | 7.4213   | 8.9036   | 0.2627  | 0.304168 |
| Phf10         | chr17:14945008-14961273   | 16.7339  | 15.2124  | -0.1375 | 0.242587 |
| Zfp942        | chr17:21926959-21962464   | 12.2027  | 14.5038  | 0.2492  | 0.456647 |
| Ubxn6         | chr17:56067044-56075028   | 11.8624  | 13.5526  | 0.1922  | 0.281189 |
| Polr2h        | chr16:20717664-20722267   | 12.1392  | 15.5066  | 0.3532  | 0.393658 |
| Cdc42bpg      | chr19:6306455-6325652     | 1.0800   | 1.4497   | 0.4248  | 0.242965 |
| Gm24452       | chr19:8724530-8724602     | 99.9495  | 70.6282  | -0.5010 | 0.372462 |
| Stx5a         | chr19:8741412-8756069     | 19.3455  | 21.7692  | 0.1703  | 0.271847 |
| Gm23436       | chr1:161036983-161037049  | 279.2620 | 342.6477 | 0.2951  | 0.296188 |
| Plxdc2        | chr2:16356303-16755839    | 1.7020   | 1.3745   | -0.3083 | 0.142231 |
| Gm13428       | chr2:36137338-36137703    | 3.5051   | 1.3808   | -1.3440 | 0.351887 |
| Mmadhc        | chr2:50279880-50296801    | 14.2079  | 17.5077  | 0.3013  | 0.401035 |
| Fastkd5       | chr2:130613839-130630027  | 9.7728   | 11.6108  | 0.2486  | 0.285245 |
| Map1lc3a      | chr2:155276296-155278073  | 2.3864   | 1.1445   | -1.0601 | 0.287555 |
| Gm8177        | chr3:57135495-57136831    | 1.3830   | 0.5377   | -1.3631 | 0.378115 |
| Dhx36         | chr3:62470038-62507004    | 42.3669  | 38.8597  | -0.1247 | 0.346951 |
| Kcnd1         | chrX:7822288-7838280      | 0.0809   | 0.2326   | 1.5239  | 0.372354 |
| Btd           | chr14:31641027-31668579   | 8.8844   | 10.9012  | 0.2952  | 0.291268 |
| Tpgs1         | chr10:79669409-79676126   | 13.7869  | 16.7600  | 0.2817  | 0.159108 |
| Chpt1         | chr10:88452744-88504073   | 0.5677   | 0.8393   | 0.5641  | 0.373774 |
| Slc1a4        | chr11:20302179-20332713   | 1.5437   | 0.9995   | -0.6271 | 0.473271 |
| Sap30l        | chr11:57801636-57810217   | 15.7678  | 19.6421  | 0.3170  | 0.394010 |
| 4933439C10Rik | chr11:59505661-59513647   | 4.2024   | 3.3595   | -0.3229 | 0.497773 |
| Mks1          | chr11:87853214-87863803   | 3.1027   | 2.4826   | -0.3216 | 0.254740 |
| Nek9          | chr12:85299513-85339362   | 29.0288  | 27.0012  | -0.1045 | 0.143893 |
| Larp4b        | chr13:9093904-9173086     | 43.4727  | 39.9983  | -0.1202 | 0.318798 |
| Hist1h4i      | chr13:22040815-22041352   | 17.9674  | 23.1150  | 0.3635  | 0.274633 |
| Zfp85         | chr13:67747799-67755228   | 8.4478   | 6.9196   | -0.2879 | 0.362701 |
| Fam21         | chr6:116208032-116262668  | 36.5666  | 34.0799  | -0.1016 | 0.059695 |
| Cox6b1        | chr7:30616973-30626151    | 217.2910 | 255.5667 | 0.2341  | 0.473209 |
| Gm4070        | chr7:105895138-105953967  | 1.7059   | 2.0887   | 0.2921  | 0.233987 |
| Ptprc         | chr7:135537823-135686294  | 12.2840  | 10.7526  | -0.1921 | 0.468047 |
| Fcer2a        | chr8:3681736-3694174      | 1.7626   | 1.1485   | -0.6180 | 0.314974 |
| Ogfod1        | chr8:94037197-94067921    | 8.1457   | 7.1883   | -0.1804 | 0.271072 |
| Scamp2        | chr9:57560943-57588797    | 32.9231  | 29.7795  | -0.1448 | 0.279368 |
| Aste1         | chr9:105395391-105405758  | 7.3718   | 6.2041   | -0.2488 | 0.304334 |
| Ppp1r3f       | chrX:7557295-7605381      | 8.3456   | 7.6347   | -0.1285 | 0.015429 |
| Rpl10         | chrX:74270811-74273135    | 22.3640  | 19.0969  | -0.2278 | 0.458288 |



|               |                           |          |          |         |          |
|---------------|---------------------------|----------|----------|---------|----------|
| Igfbp1        | chrX:100494290-100516125  | 18.1110  | 20.6604  | 0.1900  | 0.333577 |
| Cyc1          | chr15:76343522-76345934   | 52.5501  | 46.9366  | -0.1630 | 0.339112 |
| Nt5dc2        | chr14:31134852-31139121   | 1.5236   | 0.8972   | -0.7640 | 0.100506 |
| Pigq          | chr17:25926426-25944510   | 8.0880   | 7.0595   | -0.1962 | 0.355538 |
| Prm1          | chr16:10796325-10796886   | 3.8764   | 2.0161   | -0.9431 | 0.262580 |
| Gm15965       | chr16:90983906-90987237   | 2.3379   | 1.3409   | -0.8020 | 0.503938 |
| Ints5         | chr19:8892986-8897890     | 9.1210   | 10.7550  | 0.2377  | 0.259508 |
| Arhgap15      | chr2:43748823-44395953    | 37.3314  | 33.8207  | -0.1425 | 0.480398 |
| Adnp          | chr2:168180985-168207112  | 21.4349  | 18.9945  | -0.1744 | 0.491343 |
| Gm14399       | chr2:175129492-175142012  | 1.0664   | 0.6398   | -0.7370 | 0.285069 |
| Rnf207        | chr4:152307018-152318993  | 0.0799   | 0.1787   | 1.1610  | 0.335238 |
| A230060F14Rik | chr10:86021779-86022325   | 1.2857   | 2.5479   | 0.9867  | 0.140857 |
| Icam4         | chr9:21029372-21030531    | 0.4239   | 1.4004   | 1.7242  | 0.197358 |
| Gm5931        | chrX:10660521-10660998    | 3.2989   | 6.5325   | 0.9856  | 0.362709 |
| Gm10501       | chr17:34976898-34981788   | 0.4687   | 1.0704   | 1.1916  | 0.284492 |
| Ttll9         | chr2:152962484-153008482  | 0.2692   | 0.6389   | 1.2468  | 0.179205 |
| Rnft2         | chr5:118190735-118245116  | 0.1941   | 0.0904   | -1.1023 | 0.133096 |
| Aasdh         | chr5:76873658-76905514    | 5.0453   | 4.2974   | -0.2315 | 0.357320 |
| Stxbp2        | chr8:3630954-3643644      | 27.7311  | 31.0101  | 0.1612  | 0.247225 |
| Blk           | chr14:63372836-63417187   | 0.1569   | 0.4037   | 1.3632  | 0.197983 |
| Cacybp        | chr1:160202366-160212892  | 50.6578  | 43.3321  | -0.2253 | 0.541053 |
| Selm          | chr11:3514683-3517351     | 0.4471   | 1.1409   | 1.3516  | 0.215753 |
| Taf9          | chr13:100651342-100656059 | 22.6129  | 26.2774  | 0.2167  | 0.128993 |
| Cdh11         | chr8:102632994-102785111  | 0.1526   | 0.3328   | 1.1244  | 0.057543 |
| Magix         | chrX:7673163-7681251      | 0.3256   | 0.1011   | -1.6874 | 0.387589 |
| Cisd1         | chr10:71330479-71344954   | 8.8888   | 11.1213  | 0.3233  | 0.059281 |
| Wdr45b        | chr11:121327223-121354445 | 7.4542   | 8.6148   | 0.2088  | 0.113722 |
| Tecpr2        | chr12:110889263-110972394 | 2.6791   | 2.2058   | -0.2804 | 0.380519 |
| Muc6          | chr7:141633971-141655319  | 0.1572   | 0.0533   | -1.5610 | 0.453296 |
| Gm9725        | chr8:81013575-81038584    | 18.6013  | 16.3189  | -0.1889 | 0.343245 |
| Rictor        | chr15:6708380-6800398     | 29.2287  | 27.0810  | -0.1101 | 0.334998 |
| Kansl2        | chr15:98518820-98534244   | 6.1494   | 5.0266   | -0.2909 | 0.249667 |
| Z310061I04Rik | chr17:35892676-35897431   | 2.4151   | 3.3023   | 0.4514  | 0.255803 |
| Rpl31         | chr1:39367850-39371908    | 24.6267  | 20.3579  | -0.2746 | 0.465015 |
| A930004D18Rik | chr2:18025192-18037737    | 0.5072   | 0.2133   | -1.2498 | 0.255941 |
| Gm24494       | chr3:153911609-153911690  | 12.3900  | 29.2036  | 1.2370  | 0.222833 |
| Vgll4         | chr6:114860627-114969994  | 26.6472  | 23.9748  | -0.1525 | 0.427263 |
| Ruvbl1        | chr6:88465408-88497572    | 13.4273  | 11.3795  | -0.2387 | 0.336024 |
| Pgk1          | chrX:106187099-106203699  | 4.7204   | 6.1056   | 0.3712  | 0.343144 |
| Setd3         | chr12:108106430-108179314 | 14.8753  | 16.6732  | 0.1646  | 0.193774 |
| Mbnl2         | chr14:120275668-120431697 | 16.8394  | 18.8628  | 0.1637  | 0.109514 |
| Fam126a       | chr5:23915275-24030690    | 5.7274   | 6.6985   | 0.2260  | 0.265437 |
| Hsp90b1       | chr10:86690208-86705509   | 144.0045 | 134.4341 | -0.0992 | 0.369919 |
| Rel           | chr11:23741513-23770970   | 12.3859  | 10.9237  | -0.1812 | 0.099979 |
| Zfp354c       | chr11:50811085-50827724   | 0.4188   | 0.7920   | 0.9190  | 0.312394 |
| Nik           | chr11:78567167-78697373   | 14.6819  | 16.6666  | 0.1829  | 0.259302 |
| Vezf1         | chr11:88068278-88084729   | 21.4395  | 19.6436  | -0.1262 | 0.186927 |
| Gm11767       | chr11:119935802-119942698 | 3.9691   | 1.7078   | -1.2167 | 0.445114 |
| Gm3086        | chr12:69963472-69969721   | 3.5476   | 1.8594   | -0.9320 | 0.264924 |
| Gm9870        | chr5:72914295-72914942    | 14.0491  | 10.0746  | -0.4798 | 0.414370 |
| Gltp          | chr5:114669402-114690984  | 30.8629  | 35.8405  | 0.2157  | 0.414234 |
| Ras11a        | chr5:146845070-146847726  | 1.2821   | 2.6603   | 1.0531  | 0.297315 |
| Mest          | chr6:30723546-30748455    | 0.8494   | 1.2811   | 0.5929  | 0.314365 |
| Gm4604        | chr6:108140119-108140509  | 14.2695  | 8.1998   | -0.7993 | 0.467118 |
| Gm26852       | chr7:19382219-19392718    | 4.4428   | 3.7167   | -0.2575 | 0.397805 |
| Zfp84         | chr7:29768551-29779821    | 18.1288  | 15.9919  | -0.1809 | 0.461335 |
| Agbl1         | chr7:76318070-76766608    | 0.2834   | 0.1114   | -1.3476 | 0.273785 |
| Trim34a       | chr7:104244456-104340693  | 15.3342  | 17.8811  | 0.2217  | 0.395671 |
| Chst15        | chr7:132235779-132317228  | 4.5963   | 3.8787   | -0.2449 | 0.316405 |
| Whsc1l1       | chr8:25601600-25719667    | 16.3070  | 14.8860  | -0.1315 | 0.471874 |
| St3gal2       | chr8:110919921-110972480  | 7.3381   | 8.7119   | 0.2476  | 0.336964 |
| Ccdc71        | chr9:108460517-108465945  | 13.7045  | 15.6104  | 0.1879  | 0.104571 |
| Pop1          | chr15:34495303-34530648   | 9.1041   | 7.4716   | -0.2851 | 0.483639 |
| Apol9b        | chr15:77729120-77736381   | 4.7803   | 6.2828   | 0.3943  | 0.244200 |
| Rbx1          | chr15:81466315-81476369   | 24.6961  | 21.2496  | -0.2168 | 0.428062 |
| Tob2          | chr15:81848269-81858326   | 14.9137  | 13.0513  | -0.1924 | 0.430665 |
| Arfgap3       | chr15:83299739-83350247   | 5.4627   | 6.6401   | 0.2816  | 0.099385 |
| Rnase4        | chr14:51091076-51106151   | 3.8394   | 5.1548   | 0.4250  | 0.383601 |
| Gm20547       | chr17:34856411-34882042   | 0.9748   | 0.6510   | -0.5825 | 0.300808 |
| Gabbr1        | chr17:37045965-37075067   | 5.1690   | 4.3267   | -0.2566 | 0.471811 |
| Cdc5l         | chr17:45391891-45433707   | 40.2262  | 36.9398  | -0.1230 | 0.268120 |

|               |                           |         |          |         |          |
|---------------|---------------------------|---------|----------|---------|----------|
| Obfc1         | chr19:47501032-47537507   | 6.3930  | 7.6592   | 0.2607  | 0.281113 |
| Pign          | chr1:105518421-105659008  | 11.7814 | 10.5777  | -0.1555 | 0.327512 |
| 2700062C07Rik | chr18:24470860-24477765   | 9.1521  | 11.5323  | 0.3335  | 0.145942 |
| Dmxl1         | chr18:49832669-49965473   | 12.0502 | 11.0580  | -0.1240 | 0.404967 |
| Ubr3          | chr2:69897245-70024013    | 13.7690 | 12.4117  | -0.1497 | 0.424335 |
| Slc25a12      | chr2:71271062-71367749    | 14.1751 | 12.9220  | -0.1335 | 0.304552 |
| Manbal        | chr2:157367593-157396763  | 8.1455  | 10.6063  | 0.3808  | 0.294457 |
| Gm20716       | chr2:168180985-168230364  | 27.8898 | 25.3421  | -0.1382 | 0.410934 |
| Pdim5         | chr3:142239585-142395696  | 10.7718 | 9.7546   | -0.1431 | 0.258095 |
| Gm12693       | chr4:94935620-94936103    | 3.7564  | 5.7995   | 0.6266  | 0.008144 |
| 9930104L06Rik | chr4:124937047-124944656  | 6.2514  | 5.3710   | -0.2190 | 0.370317 |
| Gm12205       | chr11:52038849-52039471   | 0.4202  | 1.4496   | 1.7866  | 0.319778 |
| Chd3os        | chr11:69340460-69342641   | 1.7884  | 4.3249   | 1.2740  | 0.084539 |
| Snord8        | chr14:52209784-52209894   | 5.0471  | 13.5623  | 1.4261  | 0.288272 |
| Psd2          | chr18:35964829-36014715   | 0.6829  | 0.4050   | -0.7537 | 0.367031 |
| Gm5970        | chr18:60220842-60222058   | 2.4410  | 4.4192   | 0.8563  | 0.284143 |
| Gm24718       | chrX:96150836-96150972    | 2.2037  | 7.7658   | 1.8172  | 0.292030 |
| Naf1          | chr8:66860216-66890564    | 2.3354  | 1.5975   | -0.5479 | 0.291435 |
| Il15ra        | chr2:11705286-11733986    | 3.7073  | 4.5333   | 0.2902  | 0.211211 |
| Gm25855       | chr19:8723995-8724060     | 16.4028 | 33.5679  | 1.0331  | 0.173837 |
| Gm22549       | chr1:87341454-87341561    | 10.1993 | 2.9009   | -1.8139 | 0.416064 |
| 4833439L19Rik | chr13:54551217-54565435   | 16.7779 | 14.9017  | -0.1711 | 0.337589 |
| Rab6a         | chr7:100607409-100641268  | 22.5349 | 19.6717  | -0.1960 | 0.497264 |
| Gm23130       | chr10:23786469-23786543   | 48.3436 | 74.3946  | 0.6219  | 0.341408 |
| Zfp595        | chr13:67312997-67332560   | 10.9200 | 9.8555   | -0.1480 | 0.167051 |
| Plcx1         | chr5:110099968-110105953  | 7.7004  | 6.6964   | -0.2015 | 0.204188 |
| Ppp6r1        | chr7:4631500-4658950      | 98.4278 | 91.3382  | -0.1078 | 0.410180 |
| Nr1h2         | chr7:44549615-44553951    | 22.1450 | 25.1210  | 0.1819  | 0.313614 |
| Pcf11         | chr7:92643711-92669933    | 43.1907 | 39.7164  | -0.1210 | 0.398797 |
| Mrpl48        | chr7:100545750-100608297  | 3.1105  | 3.8200   | 0.2964  | 0.342603 |
| Dnhd1         | chr7:105640561-105721799  | 1.6448  | 1.9387   | 0.2371  | 0.224193 |
| Comt          | chr16:18406885-18426852   | 16.8848 | 19.7178  | 0.2238  | 0.341907 |
| C330006A16Rik | chr2:26136813-26140521    | 12.7510 | 10.9072  | -0.2253 | 0.369406 |
| Egf           | chr3:129677574-129755322  | 0.7107  | 0.3627   | -0.9705 | 0.307582 |
| Mob3c         | chr4:115828091-115836185  | 11.7991 | 13.5749  | 0.2023  | 0.128334 |
| Ipp           | chr4:116507548-116538243  | 8.2760  | 6.5962   | -0.3273 | 0.391549 |
| Zfp683        | chr4:134053837-134058996  | 2.1747  | 3.1639   | 0.5409  | 0.248754 |
| Gm24060       | chr11:118180940-118181035 | 7.9447  | 17.3816  | 1.1295  | 0.249842 |
| Plk1          | chr7:122159436-122169875  | 6.4139  | 8.1133   | 0.3391  | 0.378173 |
| 2010107E04Rik | chr12:111961375-111966977 | 99.8701 | 122.0635 | 0.2895  | 0.446702 |
| Capza2        | chr6:17636233-17666972    | 38.2300 | 42.7996  | 0.1629  | 0.374648 |
| Lag3          | chr6:124904360-124911705  | 17.6660 | 26.2447  | 0.5711  | 0.383122 |
| Hdgfrp2       | chr17:56079656-56100596   | 37.3766 | 34.1681  | -0.1295 | 0.195239 |
| Nr4a2         | chr2:57106829-57124003    | 2.1164  | 1.5407   | -0.4581 | 0.372349 |
| Impdh2        | chr9:108560533-108565519  | 12.0532 | 14.3388  | 0.2505  | 0.081114 |
| Dclre1c       | chr2:3424130-3464130      | 4.9467  | 4.4125   | -0.1649 | 0.226179 |
| Gm5946        | chrX:150220715-150226021  | 0.1083  | 0.3012   | 1.4751  | 0.227729 |
| Map2k6        | chr11:110399121-110525522 | 3.8164  | 3.0133   | -0.3409 | 0.348601 |
| Btdb9         | chr17:30215523-30576287   | 9.2188  | 8.1426   | -0.1791 | 0.430957 |
| Heatr5b       | chr17:78752905-78835381   | 10.4391 | 9.2018   | -0.1820 | 0.451655 |
| Dap           | chr15:31224384-31274338   | 12.2577 | 14.9947  | 0.2908  | 0.347372 |
| 4930404N11Rik | chr10:81363066-81365816   | 4.6027  | 3.3630   | -0.4527 | 0.362482 |
| Rtcb          | chr10:85938636-85957823   | 59.5674 | 67.1491  | 0.1728  | 0.345033 |
| Gm11517       | chr11:96795438-96795825   | 4.8643  | 2.5842   | -0.9125 | 0.273939 |
| Psmc2         | chr5:21785282-21803787    | 18.4152 | 16.6330  | -0.1468 | 0.385866 |
| Gsk3a         | chr7:25228257-25237851    | 32.6191 | 36.6717  | 0.1689  | 0.221682 |
| Irf7          | chr7:141262705-141266481  | 25.7524 | 35.3488  | 0.4570  | 0.357835 |
| Ppp2cb        | chr8:33599620-33619794    | 33.7006 | 37.9162  | 0.1700  | 0.108107 |
| Zfp609        | chr9:65692390-65827564    | 3.3526  | 2.8622   | -0.2282 | 0.329679 |
| Gnas          | chr2:174284319-174346744  | 24.4842 | 26.9187  | 0.1368  | 0.279683 |
| Vcp           | chr4:42979962-43000507    | 26.0102 | 24.0478  | -0.1132 | 0.167679 |
| Cdc20         | chr4:118432900-118437352  | 17.6521 | 21.3403  | 0.2737  | 0.434914 |
| H2-DMa        | chr17:34135181-34139101   | 14.9156 | 17.9192  | 0.2647  | 0.307629 |
| Usp20         | chr2:30982278-31023586    | 5.1139  | 4.2757   | -0.2582 | 0.468494 |
| Cd101         | chr3:100993529-101029556  | 14.3918 | 16.5414  | 0.2008  | 0.279943 |
| Syt6          | chr3:103575230-103645567  | 0.1693  | 0.0587   | -1.5268 | 0.210499 |
| Vdr           | chr15:97854424-97910630   | 0.3016  | 0.6298   | 1.0621  | 0.404856 |
| Edem3         | chr1:151755373-151822328  | 16.4664 | 14.8074  | -0.1532 | 0.415020 |
| Gimp          | chr3:88325022-88331313    | 10.2096 | 11.7738  | 0.2057  | 0.356727 |
| Rpl26         | chr11:68901582-68906989   | 81.8682 | 96.5150  | 0.2375  | 0.488999 |
| Dse           | chr10:34151393-34207551   | 1.2530  | 1.7613   | 0.4912  | 0.361249 |

|               |                           |          |          |         |          |
|---------------|---------------------------|----------|----------|---------|----------|
| Gm26602       | chr10:79910855-79911140   | 41.8780  | 54.4758  | 0.3794  | 0.377312 |
| Vdac1         | chr11:52360859-52389397   | 28.0731  | 25.0826  | -0.1625 | 0.381359 |
| Atp6v1d       | chr12:78842988-78861638   | 69.8981  | 78.5056  | 0.1675  | 0.263167 |
| Prkag2os2     | chr5:24873543-24875934    | 5.4528   | 4.1647   | -0.3888 | 0.252011 |
| A430072P03Rik | chr5:107725156-107728801  | 2.0056   | 2.9573   | 0.5602  | 0.339960 |
| C87436        | chr6:86438373-86473500    | 6.9483   | 8.0525   | 0.2128  | 0.093379 |
| Shkbp1        | chr7:27342132-27356019    | 12.6748  | 11.1470  | -0.1853 | 0.400278 |
| Mir762        | chr7:127708486-127708562  | 18.0837  | 30.5976  | 0.7587  | 0.297191 |
| 1700017B05Rik | chr9:57252321-57262599    | 15.7900  | 13.3036  | -0.2472 | 0.560361 |
| Stra6         | chr9:58063787-58153996    | 0.4965   | 0.7347   | 0.5654  | 0.148518 |
| Aqp9          | chr9:71110658-71168682    | 1.0077   | 0.6009   | -0.7460 | 0.546160 |
| Lima1         | chr15:99778469-99875428   | 0.4845   | 0.6901   | 0.5103  | 0.129183 |
| Tmem110       | chr14:30825589-30876986   | 6.8613   | 5.6719   | -0.2747 | 0.518561 |
| Myl12a        | chr17:70993655-71002878   | 45.4525  | 51.3562  | 0.1762  | 0.395393 |
| Pkdcc         | chr17:83215291-83225070   | 0.6699   | 1.1348   | 0.7605  | 0.326026 |
| Dcbld2        | chr16:58408442-58469727   | 0.8639   | 0.6172   | -0.4851 | 0.422594 |
| Kif20b        | chr19:34922357-34975731   | 12.2974  | 14.0230  | 0.1894  | 0.320136 |
| Wbp1l         | chr19:46599083-46657389   | 26.9468  | 24.7488  | -0.1228 | 0.299608 |
| Phlpp1        | chr1:106171751-106394250  | 6.6619   | 7.8183   | 0.2309  | 0.356608 |
| Abl2          | chr1:156558785-156649568  | 10.0772  | 9.1206   | -0.1439 | 0.375770 |
| Ssrp1         | chr2:85037233-85047109    | 85.7518  | 79.4730  | -0.1097 | 0.414831 |
| BC052040      | chr2:115581715-115778768  | 1.6764   | 1.2368   | -0.4387 | 0.321378 |
| Tom34         | chr2:164053539-164071169  | 41.2944  | 37.7924  | -0.1279 | 0.371325 |
| Orc1          | chr4:108579422-108614833  | 2.3490   | 3.1109   | 0.4053  | 0.255600 |
| Uqcrh         | chr4:116066964-116075071  | 97.1181  | 114.7534 | 0.2407  | 0.496413 |
| Gm12999       | chr4:132532686-132533601  | 18.4640  | 13.4061  | -0.4618 | 0.428330 |
| Mok           | chr12:110807797-110840939 | 0.9442   | 0.4686   | -1.0107 | 0.436504 |
| Gm8428        | chr6:8377595-8379379      | 0.6204   | 0.1915   | -1.6958 | 0.323248 |
| Scp2-ps2      | chr9:123307507-123307939  | 2.2670   | 4.8779   | 1.1055  | 0.287556 |
| Gm25397       | chr15:96404857-96404949   | 25.7153  | 12.5972  | -1.0295 | 0.322428 |
| Nxn1          | chr8:71560555-71566649    | 0.2032   | 0.4581   | 1.1727  | 0.144805 |
| I830134H01Rik | chr19:38051773-38054528   | 0.1202   | 0.3683   | 1.6155  | 0.493527 |
| Gm23297       | chr7:143531393-143531520  | 6.6170   | 16.1911  | 1.2910  | 0.412271 |
| Msl1          | chr11:98795515-98807859   | 23.7805  | 21.9582  | -0.1150 | 0.200528 |
| Hid1          | chr11:115347706-115367756 | 0.6846   | 1.1541   | 0.7534  | 0.225229 |
| Map4k4        | chr1:39900912-40026310    | 43.6446  | 40.7511  | -0.0990 | 0.272565 |
| Slc10a7       | chr8:78509334-78734005    | 9.3154   | 10.6801  | 0.1972  | 0.060992 |
| Phf19         | chr2:34893756-34914026    | 1.8166   | 2.3612   | 0.3783  | 0.335149 |
| Slc29a3       | chr10:60712071-60752794   | 3.2847   | 2.7124   | -0.2761 | 0.393548 |
| Gm26789       | chr10:63292285-63295793   | 5.0418   | 3.8191   | -0.4007 | 0.507383 |
| Z310011J03Rik | chr10:80318253-80320537   | 25.8790  | 29.4902  | 0.1885  | 0.140536 |
| Gm17305       | chr11:69364018-69369408   | 107.8522 | 96.9770  | -0.1533 | 0.228301 |
| Zfp459        | chr13:67405721-67421418   | 2.1750   | 2.8967   | 0.4134  | 0.347260 |
| Gtf2h2        | chr13:100460217-100492579 | 5.7531   | 6.9138   | 0.2651  | 0.335267 |
| Ccz1          | chr5:143987915-144014853  | 38.9065  | 43.3097  | 0.1547  | 0.022085 |
| Fbxo41        | chr6:85469573-85502994    | 0.6725   | 0.3777   | -0.8322 | 0.528852 |
| Actn4         | chr7:28893247-28962340    | 25.8959  | 23.2288  | -0.1568 | 0.502698 |
| Pts           | chr9:50521617-50528641    | 57.6854  | 65.6723  | 0.1871  | 0.251485 |
| Celsr3        | chr9:108826319-108852963  | 0.1146   | 0.0521   | -1.1368 | 0.377311 |
| Map3k12       | chr15:102497648-102517064 | 6.7748   | 5.9953   | -0.1764 | 0.428134 |
| Rps10         | chr17:27630421-27636629   | 30.1083  | 35.3206  | 0.2304  | 0.399992 |
| Pros1         | chr16:62854306-62929346   | 2.6832   | 3.4470   | 0.3614  | 0.389880 |
| Zfand5        | chr19:21272277-21282289   | 12.8634  | 11.8196  | -0.1221 | 0.093389 |
| Thap4         | chr1:93705390-93754838    | 7.8594   | 9.4031   | 0.2587  | 0.105430 |
| Etv3          | chr3:87525406-87540156    | 11.4308  | 10.5414  | -0.1169 | 0.240450 |
| 5330417C22Rik | chr3:108455693-108536526  | 0.1769   | 0.3518   | 0.9921  | 0.248210 |
| Ptpdc1        | chr13:48577872-48625573   | 0.2675   | 0.5269   | 0.9783  | 0.226479 |
| Nicn1         | chr9:108290447-108296498  | 0.4048   | 0.8386   | 1.0507  | 0.166267 |
| Akap14        | chrX:37150697-37168842    | 0.6559   | 0.2539   | -1.3691 | 0.461681 |
| Nr6a1os       | chr2:38823256-38852370    | 2.2468   | 0.9329   | -1.2681 | 0.481037 |
| Zfp341        | chr2:154613296-154646821  | 1.8894   | 1.3888   | -0.4440 | 0.226805 |
| 8430429K09Rik | chr11:3452364-3479831     | 3.1497   | 2.3622   | -0.4150 | 0.358711 |
| Arhgap26      | chr18:38601533-39376284   | 3.0439   | 2.5907   | -0.2326 | 0.530597 |
| Manea         | chr4:26324505-26346891    | 5.9239   | 7.1065   | 0.2626  | 0.341809 |
| Prmt1         | chr7:44975988-44986492    | 19.1738  | 16.7044  | -0.1989 | 0.417859 |
| Pascin1       | chr17:27655508-27711106   | 12.1274  | 10.5411  | -0.2022 | 0.504570 |
| Bod1          | chr11:31665180-31671885   | 11.3065  | 9.1835   | -0.3000 | 0.444913 |
| Gm26819       | chr13:69809913-69816094   | 9.7445   | 11.2137  | 0.2026  | 0.305208 |
| Poln          | chr5:34007197-34169448    | 0.5517   | 0.9065   | 0.7164  | 0.218126 |
| Tsc22d4       | chr5:137745729-137768450  | 17.5818  | 15.4433  | -0.1871 | 0.557175 |
| Stag2         | chrX:42149316-42277185    | 67.4785  | 62.6027  | -0.1082 | 0.425098 |

|               |                           |           |           |         |          |
|---------------|---------------------------|-----------|-----------|---------|----------|
| Dnase111      | chrX:74273216-74282337    | 3.5637    | 5.1359    | 0.5272  | 0.440733 |
| Homez         | chr14:54852735-54870961   | 2.4949    | 3.0196    | 0.2754  | 0.113833 |
| H2-K1         | chr17:33996016-34000333   | 1084.9898 | 1182.5549 | 0.1242  | 0.318237 |
| Eml3          | chr19:8929693-8941563     | 33.6378   | 30.2736   | -0.1520 | 0.434049 |
| Prkcq         | chr2:11172112-11301226    | 71.1997   | 66.4872   | -0.0988 | 0.389629 |
| Gm27003       | chr2:126675915-126683805  | 3.3054    | 6.1223    | 0.8892  | 0.186049 |
| Kif3a         | chr11:53567378-53601967   | 1.5082    | 1.0929    | -0.4647 | 0.206465 |
| Gm5577        | chr6:87980882-88005471    | 2.1281    | 1.4359    | -0.5676 | 0.333668 |
| Asb1          | chr1:91540564-91559590    | 5.3319    | 4.6013    | -0.2126 | 0.351545 |
| Sall2         | chr14:52311171-52328762   | 6.6443    | 5.6873    | -0.2244 | 0.433163 |
| 1700021A07Rik | chr10:21425341-21425650   | 6.4052    | 6.4052    | 0.9807  | 0.224719 |
| Rsf1os1       | chr7:97598348-97645112    | 0.9228    | 2.9318    | 1.6678  | 0.291986 |
| MsrB3         | chr10:120781095-120899101 | 0.5951    | 0.9406    | 0.6606  | 0.326315 |
| Trav5-4       | chr14:53704006-53704513   | 9.2854    | 5.9403    | -0.6444 | 0.208092 |
| Shprh         | chr10:11149426-11217595   | 12.0624   | 11.1312   | -0.1159 | 0.344771 |
| Smg8          | chr11:87077731-87086774   | 7.9080    | 9.1672    | 0.2132  | 0.046497 |
| Bmp2k         | chr5:96997688-97091867    | 10.8170   | 12.3868   | 0.1955  | 0.395455 |
| Gm15920       | chr5:130188394-130188796  | 2.9540    | 1.3446    | -1.1354 | 0.227689 |
| Cog8          | chr8:107046288-107056689  | 20.2382   | 18.4346   | -0.1347 | 0.325248 |
| Fdx1l         | chr9:21067519-21073514    | 27.1664   | 22.5936   | -0.2659 | 0.340087 |
| Fdx1          | chr9:51943306-51963533    | 13.9677   | 10.7666   | -0.3755 | 0.454530 |
| Herc1         | chr9:66350449-66508775    | 24.0959   | 22.7550   | -0.0826 | 0.188043 |
| Cyb5r4        | chr9:87022013-87077774    | 6.9555    | 8.2085    | 0.2390  | 0.384564 |
| Slc38a1       | chr15:96571417-96642913   | 21.4522   | 19.6985   | -0.1230 | 0.413583 |
| Ncs1          | chr2:31245822-31295989    | 1.4239    | 1.0902    | -0.3852 | 0.088165 |
| Ciz1          | chr2:32352326-32380226    | 11.8145   | 10.4659   | -0.1749 | 0.481218 |
| Ece1          | chr4:13786236-137965229   | 12.8147   | 11.0314   | -0.2162 | 0.460876 |
| Dyrk3         | chr1:131128440-131138234  | 0.7567    | 0.2877    | -1.3950 | 0.392999 |
| Zfp280b       | chr10:76032653-76043234   | 12.1450   | 10.9743   | -0.1462 | 0.233502 |
| Atg12         | chr18:46732416-46741579   | 20.8087   | 24.0310   | 0.2077  | 0.313919 |
| Stx17         | chr4:48124914-48186507    | 6.1825    | 5.3238    | -0.2157 | 0.435373 |
| Snora16a      | chr4:132309464-132309600  | 16.6035   | 25.7964   | 0.6357  | 0.316200 |
| Hmha1         | chr10:80016652-80031472   | 305.1580  | 282.6443  | -0.1106 | 0.507192 |
| BC030307      | chr10:86705810-86776843   | 0.6872    | 0.4635    | -0.5683 | 0.032225 |
| Gm12216       | chr11:53783417-53859256   | 2.9453    | 3.8617    | 0.3908  | 0.260320 |
| Kdm6b         | chr11:69398507-69413675   | 3.9723    | 3.3806    | -0.2327 | 0.360309 |
| Zfp868        | chr8:69610856-69625548    | 6.6470    | 8.0996    | 0.2851  | 0.340671 |
| Sin3a         | chr9:57072039-57128366    | 30.4696   | 28.2379   | -0.1097 | 0.260119 |
| Ptpn4         | chr1:119658043-119837613  | 10.1593   | 11.7280   | 0.2072  | 0.353734 |
| Wdsub1        | chr2:59852363-59882591    | 1.9460    | 2.6206    | 0.4294  | 0.280474 |
| Gm20402       | chr3:52268434-52269435    | 30.9516   | 24.9763   | -0.3095 | 0.435565 |
| Slc22a15      | chr3:101858953-101924453  | 3.1701    | 3.8113    | 0.2658  | 0.424376 |
| Gm24895       | chr12:109646128-109646202 | 15.5757   | 4.6431    | -1.7461 | 0.337298 |
| Gcc1          | chr6:28416090-28428390    | 13.4794   | 12.3045   | -0.1316 | 0.157399 |
| Fgfr1op2      | chr6:146577202-146599198  | 37.5880   | 34.8887   | -0.1075 | 0.283010 |
| Acpt          | chr7:44252147-44257378    | 3.8825    | 2.7246    | -0.5109 | 0.366271 |
| Crebrf        | chr17:26715649-26776635   | 23.3651   | 26.0692   | 0.1580  | 0.343853 |
| Cd79b         | chr11:106311340-106314762 | 3.6153    | 5.3071    | 0.5538  | 0.370214 |
| Gtf2h3        | chr5:124579139-124597680  | 9.9231    | 11.4791   | 0.2101  | 0.274121 |
| Casc1         | chr6:145174833-145210970  | 2.6500    | 2.1339    | -0.3125 | 0.410732 |
| Fosb          | chr7:19302720-19310045    | 0.3233    | 0.5849    | 0.8550  | 0.382440 |
| Il18bp        | chr7:102015078-102018155  | 10.4968   | 8.5251    | -0.3002 | 0.328964 |
| Thumpd1       | chr7:119715095-119720765  | 39.3720   | 35.5776   | -0.1462 | 0.442753 |
| Lig4          | chr8:9970019-9977686      | 2.5484    | 3.2450    | 0.3486  | 0.329726 |
| Gm26882       | chr9:90094177-90095902    | 6.3009    | 4.9637    | -0.3441 | 0.250552 |
| Setd2         | chr9:110532596-110618633  | 25.3434   | 23.2136   | -0.1266 | 0.471660 |
| 5330439K02Rik | chr15:100459739-100468691 | 0.3018    | 0.5971    | 0.9842  | 0.148866 |
| Pex6          | chr17:46711462-46725541   | 12.0440   | 10.7023   | -0.1704 | 0.312604 |
| Tfap4         | chr16:4544660-4559720     | 9.0502    | 7.3206    | -0.3060 | 0.404854 |
| Ncoa3         | chr2:165992635-166073242  | 47.6050   | 44.8154   | -0.0871 | 0.191488 |
| Alg2          | chr4:47465066-47474333    | 6.4930    | 5.3823    | -0.2707 | 0.435109 |
| Mrpl50        | chr4:49512595-49521093    | 10.3478   | 13.2971   | 0.3618  | 0.494694 |
| Fgd2          | chr17:29360913-29379660   | 0.1590    | 0.3656    | 1.2014  | 0.305646 |
| Tnni3         | chr7:4518304-4524229      | 0.2342    | 0.5792    | 1.3063  | 0.280809 |
| Kcnmb4        | chr10:116417860-116473878 | 2.0941    | 1.5590    | -0.4258 | 0.319619 |
| Traj14        | chr14:54205110-54205143   | 247.6459  | 323.8457  | 0.3870  | 0.249430 |
| Tnfaip8       | chr18:49979426-50107173   | 13.0382   | 14.3007   | 0.1333  | 0.067511 |
| Mms22l        | chr4:24496450-24602950    | 7.8295    | 8.9171    | 0.1877  | 0.216626 |
| Bub1b         | chr2:118598210-118641591  | 16.4707   | 18.5985   | 0.1753  | 0.265858 |
| Gm23969       | chr2:26911260-26911334    | 6.7164    | 16.6800   | 1.3124  | 0.265069 |
| Tiam2         | chr17:3326572-3519397     | 0.4993    | 0.7324    | 0.5529  | 0.259985 |

|               |                           |          |          |         |          |
|---------------|---------------------------|----------|----------|---------|----------|
| Ghdc          | chr11:100766031-100770957 | 2.8795   | 2.1724   | -0.4065 | 0.267209 |
| Rpl29         | chr9:106429453-106431568  | 13.6772  | 18.0623  | 0.4012  | 0.411573 |
| Kdm5c         | chrX:152233019-152274535  | 27.8503  | 31.0268  | 0.1558  | 0.348587 |
| Lmbr1l        | chr15:98903920-98918231   | 20.7393  | 18.4906  | -0.1656 | 0.482150 |
| Kdm1a         | chr4:136550539-136602723  | 28.3978  | 26.1029  | -0.1216 | 0.389327 |
| Gm22573       | chr4:155720039-155720141  | 3.7682   | 10.2939  | 1.4498  | 0.126344 |
| Btbd11        | chr10:85386813-85660292   | 1.9069   | 1.4788   | -0.3668 | 0.463581 |
| Gm22061       | chr11:98946443-98946550   | 9.6757   | 3.1610   | -1.6140 | 0.461013 |
| Gm20655       | chr10:17790521-17799921   | 0.3538   | 0.1476   | -1.2618 | 0.219667 |
| Map2k2        | chr10:81105914-81124697   | 23.6119  | 26.7864  | 0.1820  | 0.392165 |
| Tmpo          | chr10:91147570-91171582   | 55.9263  | 60.7397  | 0.1191  | 0.131074 |
| Vrk2          | chr11:26471321-26593999   | 6.8391   | 6.0392   | -0.1795 | 0.373178 |
| Z310033P09Rik | chr11:59208320-59210738   | 21.0814  | 18.1388  | -0.2169 | 0.312236 |
| Rai1          | chr11:60105012-60199197   | 7.3629   | 6.5113   | -0.1773 | 0.464651 |
| Llg1          | chr11:60699722-60714186   | 14.2194  | 12.5591  | -0.1791 | 0.473761 |
| Pctp          | chr11:89982664-90002894   | 1.9706   | 2.6594   | 0.4324  | 0.253522 |
| Mrpl45        | chr11:97315715-97329920   | 13.1804  | 15.8158  | 0.2630  | 0.387307 |
| Cdc42bpb      | chr12:111292971-111377718 | 0.1423   | 0.3019   | 1.0847  | 0.283085 |
| Trim27        | chr13:21179444-21194724   | 26.9187  | 24.3462  | -0.1449 | 0.485519 |
| NA            | chr13:109954108-109955963 | 5.5500   | 4.4200   | -0.3284 | 0.292705 |
| Gtf2ird2      | chr5:134184018-134224355  | 4.1746   | 3.6012   | -0.2132 | 0.169362 |
| Cnpy4         | chr5:138187484-138193918  | 8.4771   | 10.4016  | 0.2952  | 0.352059 |
| Mthfd2        | chr6:83305690-83317606    | 30.6073  | 27.9940  | -0.1288 | 0.242937 |
| Paf1          | chr7:28392950-28399388    | 26.8102  | 29.9663  | 0.1606  | 0.248545 |
| Uvrag         | chr7:98886742-99141144    | 18.0249  | 20.6427  | 0.1956  | 0.302171 |
| Btbd10        | chr7:113315625-113369392  | 5.4294   | 4.6811   | -0.2139 | 0.332724 |
| Gm16845       | chr9:22071031-22086122    | 4.2350   | 5.6527   | 0.4166  | 0.222105 |
| Cbl           | chr9:44149261-44234046    | 25.5479  | 22.4534  | -0.1863 | 0.586829 |
| Bnip2         | chr9:69989465-70008317    | 32.1176  | 35.9859  | 0.1641  | 0.281207 |
| Mpst          | chr15:78406711-78414002   | 11.7131  | 13.9865  | 0.2559  | 0.195383 |
| Atf1          | chr15:100227818-100261244 | 7.4669   | 8.8540   | 0.2458  | 0.201301 |
| Prr13         | chr15:102459027-102462806 | 44.5287  | 51.4667  | 0.2089  | 0.435305 |
| Bnip3l        | chr14:66985238-67008877   | 16.9933  | 19.4105  | 0.1919  | 0.370637 |
| Kifc1         | chr17:33875665-33890661   | 3.8724   | 4.7217   | 0.2861  | 0.124547 |
| Gm15648       | chr16:17152629-17153704   | 33.4646  | 29.0166  | -0.2058 | 0.188688 |
| Clcn2         | chr16:20702963-20717746   | 0.8733   | 0.6082   | -0.5218 | 0.375942 |
| Ccdc58        | chr16:36071659-36092118   | 8.4761   | 11.9275  | 0.4928  | 0.410847 |
| Stat1         | chr1:52119437-52161865    | 226.4972 | 247.5626 | 0.1283  | 0.301517 |
| Snrpe         | chr1:133603870-133610291  | 28.9569  | 34.8327  | 0.2665  | 0.447805 |
| Gm13568       | chr2:26457143-26458316    | 10.7237  | 7.4583   | -0.5239 | 0.190464 |
| Stkld1        | chr2:26934046-26953496    | 2.3829   | 1.6241   | -0.5530 | 0.471828 |
| Nup210l       | chr3:90104131-90212017    | 2.2428   | 1.6327   | -0.4581 | 0.494462 |
| Gm15886       | chr3:103771951-103789402  | 25.7225  | 29.4090  | 0.1932  | 0.138387 |
| O610037L13Rik | chr4:107889812-107899384  | 8.2164   | 7.3654   | -0.1577 | 0.208903 |
| Sf3a3         | chr4:124714775-124732460  | 37.2636  | 34.1203  | -0.1271 | 0.349022 |
| Dhdds         | chr4:133969027-134000918  | 9.2320   | 8.0273   | -0.2017 | 0.362324 |
| Slc29a4       | chr5:142702100-142722490  | 0.2298   | 0.5636   | 1.2944  | 0.204443 |
| Rassf8        | chr6:145746747-145821079  | 0.1345   | 0.3218   | 1.2582  | 0.261590 |
| Gm7030        | chr17:36109718-36129425   | 1.5787   | 2.5713   | 0.7037  | 0.130370 |
| mt-Tm         | chrM:3844-3913            | 7.7366   | 20.1524  | 1.3812  | 0.280585 |
| Ccdc30        | chr4:119322892-119415521  | 0.4283   | 0.6873   | 0.6823  | 0.417607 |
| Rnf144b       | chr13:47122719-47247991   | 0.1498   | 0.3448   | 1.2030  | 0.300845 |
| Fut10         | chr8:31187330-31261738    | 0.2329   | 0.5041   | 1.1142  | 0.298146 |
| Fkbp1         | chr17:34644763-34646324   | 2.3569   | 3.3999   | 0.5286  | 0.155838 |
| Psmb7         | chr2:38588035-38644087    | 58.7330  | 68.4436  | 0.2207  | 0.432827 |
| Tnfaip3       | chr10:19000909-19015657   | 21.9229  | 23.9563  | 0.1280  | 0.099913 |
| Gm26577       | chr10:21145093-21154374   | 11.5965  | 9.8351   | -0.2377 | 0.373220 |
| Hdac2         | chr10:36974543-37001889   | 26.1854  | 23.0754  | -0.1824 | 0.542167 |
| Rtkn2         | chr10:67979569-68059740   | 0.3943   | 0.2151   | -0.8745 | 0.173663 |
| A430046D13Rik | chr10:128499363-128504242 | 3.1991   | 4.2758   | 0.4185  | 0.233301 |
| Wibg          | chr10:128747878-128766568 | 43.2819  | 51.0966  | 0.2395  | 0.441986 |
| Nf2           | chr11:4765844-4849536     | 15.9718  | 17.9256  | 0.1665  | 0.360554 |
| Ube2b         | chr11:51985496-52000762   | 35.8837  | 41.3636  | 0.2050  | 0.403327 |
| Rapgef6       | chr11:54522846-54699285   | 71.3270  | 67.0764  | -0.0886 | 0.350300 |
| Gm10434       | chr11:59208245-59208720   | 11.9125  | 8.1155   | -0.5537 | 0.281621 |
| Jmjd4         | chr11:59450044-59458567   | 6.5722   | 5.8621   | -0.1650 | 0.310002 |
| Gucy2e        | chr11:69218116-69237036   | 0.9219   | 0.6792   | -0.4409 | 0.497609 |
| Kdm6bos       | chr11:69401512-69402700   | 6.1647   | 4.5779   | -0.4293 | 0.057661 |
| 1700016P03Rik | chr11:75172559-75177633   | 16.3822  | 13.2676  | -0.3042 | 0.320215 |
| Tnfaip1       | chr11:78522849-78536332   | 5.0797   | 6.1506   | 0.2760  | 0.347044 |
| Slfm9         | chr11:82979628-82991830   | 8.6533   | 9.8910   | 0.1929  | 0.213550 |

|            |                           |          |          |         |          |
|------------|---------------------------|----------|----------|---------|----------|
| Mrps23     | chr11:88204387-88211507   | 30.0853  | 34.3695  | 0.1921  | 0.258941 |
| Hspb9      | chr11:100713849-100714575 | 3.0035   | 1.8045   | -0.7350 | 0.221895 |
| Nsf        | chr11:103821781-103954056 | 8.5482   | 9.6010   | 0.1676  | 0.219510 |
| Kansl1     | chr11:104333228-104468861 | 22.3849  | 20.3005  | -0.1410 | 0.509999 |
| Kpna2      | chr11:106988628-106999541 | 5.1637   | 6.3909   | 0.3076  | 0.329166 |
| Anapc11    | chr11:120598420-120608198 | 4.8516   | 5.6915   | 0.2303  | 0.235087 |
| BC068281   | chr12:4843302-4856925     | 4.0092   | 3.2302   | -0.3117 | 0.333894 |
| Ubxn2a     | chr12:4879031-4907705     | 22.3413  | 19.8010  | -0.1741 | 0.451133 |
| Tmem18     | chr12:30584442-30591213   | 21.1205  | 23.6293  | 0.1619  | 0.146104 |
| Gm22058    | chr12:69930903-69931213   | 6.0303   | 9.1974   | 0.6090  | 0.064343 |
| Ttc8       | chr12:98920573-98983238   | 0.7011   | 1.0685   | 0.6079  | 0.074292 |
| Lymm4      | chr13:35978796-36117357   | 10.8297  | 13.1670  | 0.2819  | 0.268517 |
| Ccnh       | chr13:85189407-85223469   | 22.8052  | 26.7507  | 0.2302  | 0.453124 |
| Vcan       | chr13:89655311-89742509   | 0.1080   | 0.0436   | -1.3095 | 0.271027 |
| Homer1     | chr13:93303756-93404129   | 4.4088   | 3.7970   | -0.2155 | 0.483983 |
| Btf3       | chr13:98309895-98317006   | 54.1953  | 63.2710  | 0.2234  | 0.487874 |
| Snx18      | chr13:113592179-113618564 | 27.4498  | 25.0043  | -0.1346 | 0.423523 |
| Rint1      | chr5:23787710-23820369    | 6.6135   | 5.8754   | -0.1707 | 0.330061 |
| Zbtb49     | chr5:38189734-38220457    | 2.7124   | 2.2434   | -0.2739 | 0.408492 |
| Tmem33     | chr5:67260564-67291461    | 10.2151  | 11.4184  | 0.1606  | 0.190592 |
| Rps15a-ps5 | chr5:105797286-105797743  | 28.4515  | 39.8905  | 0.4875  | 0.514663 |
| Oas3       | chr5:120753097-12077661   | 10.9364  | 13.2241  | 0.2740  | 0.520095 |
| Rad9b      | chr5:122323222-122354233  | 10.6067  | 9.3821   | -0.1770 | 0.067430 |
| Mafk       | chr5:139791512-139802653  | 11.2947  | 13.2485  | 0.2302  | 0.354251 |
| Zfml       | chr6:83914352-83986869    | 64.6037  | 59.5809  | -0.1168 | 0.471768 |
| Cecr5      | chr6:120509493-120531319  | 33.7693  | 30.9301  | -0.1267 | 0.398355 |
| Gm23547    | chr6:124715231-124715502  | 21.6011  | 28.6824  | 0.4091  | 0.258252 |
| Wbp11      | chr6:136813653-136828233  | 12.3332  | 11.2583  | -0.1316 | 0.127006 |
| Tm7sf3     | chr6:146602351-146642824  | 9.5953   | 11.0664  | 0.2058  | 0.211787 |
| Zfp787     | chr7:6131488-6155971      | 6.6020   | 8.1630   | 0.3062  | 0.255422 |
| Chmp2a     | chr7:13032005-13034777    | 127.8423 | 141.8364 | 0.1499  | 0.232649 |
| Snrpd2     | chr7:19149721-19152735    | 51.7898  | 42.3306  | -0.2910 | 0.549463 |
| Zfp180     | chr7:24081923-24107698    | 17.6492  | 15.7767  | -0.1618 | 0.436780 |
| Kcnk6      | chr7:29221927-29232522    | 3.9081   | 4.9136   | 0.3303  | 0.366565 |
| Sipa1l3    | chr7:29320371-29518641    | 1.0273   | 0.8573   | -0.2610 | 0.284050 |
| Proser3    | chr7:30539133-30552296    | 1.4110   | 0.9103   | -0.6323 | 0.446475 |
| Irf3       | chr7:44997647-45002848    | 53.7453  | 49.6655  | -0.1139 | 0.405309 |
| Numa1      | chr7:101969842-102014959  | 77.4223  | 72.5616  | -0.0935 | 0.404198 |
| Trim30a    | chr7:104409024-104465193  | 57.0806  | 63.9383  | 0.1637  | 0.421509 |
| Mrpl17     | chr7:105806657-105811099  | 7.5667   | 8.7733   | 0.2135  | 0.249986 |
| Sh2b1      | chr7:126466993-126475130  | 22.1431  | 19.3577  | -0.1939 | 0.514710 |
| Coro1a     | chr7:126699772-126707787  | 543.4459 | 595.0533 | 0.1309  | 0.380847 |
| B4galnt4   | chr7:141061273-141072119  | 11.1734  | 13.9079  | 0.3158  | 0.510397 |
| Rnh1       | chr7:141160327-141172851  | 39.2872  | 43.7871  | 0.1564  | 0.182764 |
| Prr33      | chr7:142491073-142506771  | 6.5456   | 8.3384   | 0.3492  | 0.352422 |
| Alg11      | chr8:22060720-22071627    | 10.1854  | 9.0850   | -0.1649 | 0.349549 |
| Il27ra     | chr8:84030286-84042575    | 100.9880 | 113.0371 | 0.1626  | 0.421733 |
| Nudt21     | chr8:94017769-94037021    | 4.1960   | 5.2379   | 0.3200  | 0.303116 |
| Cenpn      | chr8:116921739-116941503  | 4.8748   | 6.2808   | 0.3656  | 0.314308 |
| Cox4i1     | chr8:120668221-120674207  | 105.2956 | 120.7178 | 0.1972  | 0.469715 |
| NA         | chr8:122443655-122445647  | 6.4334   | 7.8610   | 0.2891  | 0.141626 |
| Fam76b     | chr9:13827715-13846541    | 23.6755  | 26.3769  | 0.1559  | 0.236372 |
| Zpr1       | chr9:46273063-46282643    | 20.6536  | 18.7131  | -0.1423 | 0.350439 |
| Acat1      | chr9:53580521-53610382    | 20.3004  | 23.0072  | 0.1806  | 0.329717 |
| Trip4      | chr9:65828929-65908794    | 6.8165   | 7.8321   | 0.2004  | 0.381822 |
| Hyal1      | chr9:107576926-107581710  | 0.5799   | 0.9913   | 0.7735  | 0.254822 |
| Rbm6       | chr9:107773558-107873237  | 15.0705  | 14.0101  | -0.1053 | 0.316886 |
| Cmtm6      | chr9:114731202-114749343  | 59.3903  | 54.5941  | -0.1215 | 0.453166 |
| Gpd1l      | chr9:114899340-114933987  | 14.9983  | 13.8097  | -0.1191 | 0.089957 |
| Eomes      | chr9:118478211-118486132  | 23.3662  | 17.3362  | -0.4306 | 0.471891 |
| Fmr1       | chrX:68678540-68717963    | 13.3648  | 12.2150  | -0.1298 | 0.401758 |
| Tmem164    | chrX:142681405-142843494  | 22.1684  | 20.6331  | -0.1035 | 0.265158 |
| Naprt      | chr15:75890963-75894481   | 1.9603   | 2.8050   | 0.5169  | 0.326152 |
| Gm17349    | chr15:99702175-99705490   | 1.6456   | 4.0227   | 1.2896  | 0.298364 |
| Gm10044    | chr14:7744062-7791651     | 1.3795   | 0.8871   | -0.6369 | 0.409534 |
| Ap3m1      | chr14:21031441-21052508   | 11.7732  | 10.5921  | -0.1525 | 0.432044 |
| Gm17173    | chr14:44972267-45006900   | 7.8330   | 6.3722   | -0.2978 | 0.495472 |
| Zfp395     | chr14:65358675-65398930   | 1.4043   | 1.9598   | 0.4809  | 0.360336 |
| Paqr4      | chr17:23736185-23740330   | 8.4721   | 10.3623  | 0.2906  | 0.452599 |
| Abca3      | chr17:24351949-24410201   | 11.6283  | 10.2740  | -0.1786 | 0.549811 |
| Gng13      | chr17:25717170-25719406   | 2.6241   | 4.0805   | 0.6369  | 0.267051 |

|               |                           |          |          |         |          |
|---------------|---------------------------|----------|----------|---------|----------|
| Spast         | chr17:74338986-74391113   | 20.3971  | 18.7140  | -0.1242 | 0.280244 |
| Dnaja3        | chr16:4639988-4707695     | 16.6863  | 15.0969  | -0.1444 | 0.334421 |
| Ciita         | chr16:10488177-10527564   | 0.3108   | 0.5095   | 0.7130  | 0.204039 |
| Parn          | chr16:13537963-13668170   | 18.7474  | 16.7886  | -0.1592 | 0.331388 |
| Gsk3b         | chr16:38089000-38246084   | 10.4162  | 9.3100   | -0.1620 | 0.518109 |
| Cd47          | chr16:49855617-49915010   | 26.0762  | 29.4477  | 0.1754  | 0.397215 |
| 2310043M15Rik | chr16:93792149-93794888   | 0.7262   | 1.3111   | 0.8524  | 0.368306 |
| Kat5          | chr19:5603016-5610094     | 30.0608  | 34.1734  | 0.1850  | 0.305379 |
| Dpf2          | chr19:5896515-5913010     | 10.9090  | 9.7839   | -0.1570 | 0.427796 |
| Tmem258       | chr19:10204013-10207824   | 34.6535  | 40.4153  | 0.2219  | 0.418079 |
| Lcor          | chr19:41482644-41562246   | 8.0542   | 7.1773   | -0.1663 | 0.435433 |
| NA            | chr19:47894597-47919299   | 21.5305  | 19.2236  | -0.1635 | 0.443977 |
| Cops5         | chr1:10024601-10038127    | 20.7552  | 18.8267  | -0.1407 | 0.286727 |
| Tgfbra1       | chr1:43047268-43098622    | 7.6494   | 8.7074   | 0.1869  | 0.181882 |
| Ankrd44       | chr1:54645339-54926387    | 32.7252  | 30.8239  | -0.0864 | 0.259759 |
| Trak2         | chr1:58900448-58973430    | 18.0263  | 16.6364  | -0.1158 | 0.277223 |
| Gm26649       | chr1:64029462-64032927    | 2.4695   | 3.2689   | 0.4046  | 0.337647 |
| Ctdsp1        | chr1:74391508-74397285    | 10.7176  | 9.3878   | -0.1911 | 0.323001 |
| Rhbdd1        | chr1:82316451-82445366    | 9.0342   | 10.4729  | 0.2132  | 0.268893 |
| Ube2f         | chr1:91250310-91288877    | 9.7530   | 8.5741   | -0.1859 | 0.367423 |
| Ndufa10       | chr1:92439009-92473860    | 45.2825  | 41.4449  | -0.1278 | 0.362916 |
| 4930523C07Rik | chr1:160044383-160078428  | 27.5260  | 30.0759  | 0.1278  | 0.062568 |
| Nme7          | chr1:164312878-164348181  | 11.7916  | 14.8284  | 0.3306  | 0.197262 |
| Rbm22         | chr18:60560735-60572810   | 22.6436  | 20.8876  | -0.1165 | 0.298027 |
| Ldlrad4       | chr18:67933256-68255549   | 26.5489  | 23.1810  | -0.1957 | 0.528228 |
| Stard6        | chr18:70472453-70501066   | 0.3016   | 0.6765   | 1.1655  | 0.183229 |
| Ndor1         | chr2:25244820-25256022    | 13.2732  | 12.0254  | -0.1424 | 0.364641 |
| 1810012K08Rik | chr2:26138545-26139543    | 12.4779  | 9.1955   | -0.4404 | 0.389969 |
| Tbc1d13       | chr2:30133745-30152013    | 17.7555  | 15.9826  | -0.1518 | 0.443086 |
| Slc25a25      | chr2:32414486-32451445    | 8.3807   | 7.0857   | -0.2422 | 0.548079 |
| Katnbl1       | chr2:112379210-112414240  | 4.1810   | 5.0393   | 0.2694  | 0.250510 |
| Tgif2         | chr2:156840076-156855570  | 7.2673   | 6.3820   | -0.1874 | 0.098360 |
| Pcmt2         | chr2:181837853-181857461  | 25.7715  | 29.0035  | 0.1705  | 0.341673 |
| Sec62         | chr3:30792875-30821263    | 36.4600  | 33.8595  | -0.1068 | 0.216976 |
| Phc3          | chr3:30899294-30969415    | 15.1118  | 13.9152  | -0.1190 | 0.458293 |
| Mccc1os       | chr3:35999832-36025106    | 0.5269   | 0.3513   | -0.5848 | 0.316351 |
| 2810403A07Rik | chr3:88685793-88712933    | 54.0658  | 50.4448  | -0.1000 | 0.180045 |
| S100a13       | chr3:90514434-90524581    | 52.0313  | 60.0613  | 0.2071  | 0.269802 |
| Them4         | chr3:94310088-94332540    | 1.7014   | 1.2269   | -0.4716 | 0.365231 |
| Hist2h3b      | chr3:96268653-96269141    | 115.3072 | 157.7917 | 0.4525  | 0.373444 |
| Usp53         | chr3:122933600-122984447  | 14.3311  | 12.8264  | -0.1600 | 0.342476 |
| Ints12        | chr3:133091839-133110988  | 4.1249   | 4.8096   | 0.2216  | 0.282216 |
| Ccnc          | chr4:21727700-21759922    | 9.3232   | 10.8185  | 0.2146  | 0.370849 |
| Plin2         | chr4:86648385-86670060    | 6.1544   | 7.2495   | 0.2363  | 0.208500 |
| Gm12870       | chr4:107327483-107328499  | 1.2781   | 0.6686   | -0.9347 | 0.084423 |
| Ust           | chr10:8204752-8518825     | 0.5432   | 0.2632   | -1.0455 | 0.313976 |
| 1500009L16Rik | chr10:83722864-83762761   | 3.0244   | 5.2135   | 0.7856  | 0.292680 |
| Gm11948       | chr11:3353572-3354911     | 0.7747   | 2.1736   | 1.4885  | 0.277586 |
| Pgam2         | chr11:5801639-5803733     | 3.7843   | 6.3939   | 0.7567  | 0.306585 |
| Omg           | chr11:79500981-79504084   | 1.0788   | 0.4875   | -1.1459 | 0.490300 |
| Jup           | chr11:100368957-100397763 | 0.1500   | 0.2986   | 0.9935  | 0.156334 |
| Gm26764       | chr12:87332487-87335655   | 0.6814   | 1.2319   | 0.8544  | 0.191125 |
| Aldh1l1       | chr6:90486426-90600203    | 0.3613   | 0.5989   | 0.7291  | 0.255172 |
| Gm16282       | chr7:29138439-29140312    | 3.2605   | 1.4217   | -1.1975 | 0.405237 |
| Tnfrsf13c     | chr15:82221743-82224339   | 0.4447   | 1.0358   | 1.2197  | 0.293220 |
| Gm13999       | chr2:120024806-120027453  | 1.3884   | 3.0315   | 1.1266  | 0.258251 |
| Strc          | chr2:121363727-121387168  | 0.4127   | 0.1940   | -1.0890 | 0.484518 |
| Gm14026       | chr2:129168699-129170488  | 0.7640   | 1.6754   | 1.1329  | 0.288290 |
| Cystm1        | chr18:36345618-36402980   | 0.4282   | 0.1753   | -1.2887 | 0.475406 |
| Dclk1         | chr3:55242525-55539064    | 0.0215   | 0.0625   | 1.5419  | 0.136925 |
| Gm24016       | chr4:3835078-3835146      | 6.9084   | 18.0132  | 1.3826  | 0.245049 |
| Gm13038       | chr4:143152571-143153030  | 8.7013   | 4.2457   | -1.0352 | 0.498247 |
| Prdm16        | chr4:154316124-154636873  | 0.4563   | 0.2350   | -0.9575 | 0.414984 |
| Dusp3         | chr11:101971142-101987013 | 0.1210   | 0.2861   | 1.2410  | 0.251960 |
| Gm15473       | chr6:17058805-17064996    | 0.8532   | 0.2921   | -1.5463 | 0.419485 |
| Il17c         | chr8:122422019-122423639  | 0.4927   | 1.3712   | 1.4767  | 0.241922 |
| 2700046G09Rik | chr19:32389215-32391184   | 1.0205   | 0.4268   | -1.2576 | 0.353047 |
| Rbmx2         | chrX:48695003-48710723    | 4.2821   | 3.3723   | -0.3446 | 0.130873 |
| 2810425M01Rik | chr10:77486663-77516430   | 6.6334   | 8.1045   | 0.2890  | 0.184276 |
| Mis12         | chr11:71019610-71027371   | 14.5325  | 16.4366  | 0.1776  | 0.115407 |
| Cdk12         | chr11:98203058-98278504   | 20.9400  | 19.5704  | -0.0976 | 0.320182 |

|               |                           |          |         |         |          |
|---------------|---------------------------|----------|---------|---------|----------|
| 2310003H01Rik | chr11:120369054-120378764 | 6.3127   | 5.4594  | -0.2095 | 0.406562 |
| Sypl          | chr12:32953890-32979050   | 4.2580   | 5.1032  | 0.2612  | 0.392661 |
| F13a1         | chr13:36867177-37050244   | 2.5887   | 3.5367  | 0.4502  | 0.425819 |
| Ttc37         | chr13:76098733-76187983   | 17.3831  | 15.7181 | -0.1453 | 0.451437 |
| Jazf1         | chr6:52768796-53068631    | 4.5921   | 5.6275  | 0.2934  | 0.162441 |
| 2900076A07Rik | chr7:81523549-81531498    | 16.5458  | 14.1125 | -0.2295 | 0.472408 |
| Cacna1a       | chr8:84388439-84640246    | 0.5555   | 0.7839  | 0.4970  | 0.373820 |
| Gm16536       | chr9:45856768-45858357    | 6.3291   | 4.9434  | -0.3565 | 0.376654 |
| Armc8         | chr9:99478390-99568899    | 17.5492  | 16.0069 | -0.1327 | 0.296553 |
| Thoc2         | chrX:41794990-41920674    | 25.2337  | 23.3838 | -0.1098 | 0.434728 |
| Pam16         | chr16:4616463-4624988     | 2.2408   | 1.2827  | -0.8048 | 0.179507 |
| Slc3a2        | chr19:8706881-8723369     | 34.9752  | 32.0387 | -0.1265 | 0.362599 |
| Nmnat2        | chr1:152955100-153119260  | 0.4300   | 0.6560  | 0.6093  | 0.136901 |
| Gpr21         | chr2:37516331-37520603    | 1.1564   | 0.8288  | -0.4806 | 0.119347 |
| Rnf114        | chr2:167492644-167516173  | 55.8987  | 61.8780 | 0.1466  | 0.312137 |
| Gm16069       | chr3:89180754-89182293    | 25.0200  | 19.3258 | -0.3726 | 0.525913 |
| Agl           | chr3:116739998-116808166  | 1.8201   | 1.5221  | -0.2579 | 0.414876 |
| Gbp5          | chr3:142496933-142522344  | 19.1563  | 22.4317 | 0.2277  | 0.439379 |
| Klf16         | chr10:80567123-80577321   | 8.9219   | 7.4034  | -0.2692 | 0.432600 |
| Tmem229b      | chr12:78961794-79007627   | 16.3856  | 18.3223 | 0.1612  | 0.243246 |
| Gm4787        | chr12:81376990-81379464   | 1.1385   | 0.6987  | -0.7045 | 0.370279 |
| Cfap20        | chr8:95420251-95434869    | 23.7969  | 20.9910 | -0.1810 | 0.198669 |
| Crat          | chr2:30400470-30415813    | 2.3086   | 1.8053  | -0.3547 | 0.464134 |
| NA            | chr2:73012853-73012927    | 12.0839  | 5.8187  | -1.0543 | 0.029514 |
| Rpl3-ps1      | chrX:13202545-13203838    | 0.4728   | 1.0924  | 1.2082  | 0.280352 |
| Rab33a        | chrX:48519284-48530232    | 0.9087   | 0.3361  | -1.4350 | 0.346304 |
| Slc35a5       | chr16:45139572-45158706   | 7.2469   | 6.5525  | -0.1453 | 0.283668 |
| Tm6sf1        | chr7:81859000-81884434    | 5.3981   | 4.7409  | -0.1873 | 0.315322 |
| Eif2ak2       | chr17:78852563-78882573   | 25.5718  | 29.3565 | 0.1991  | 0.464847 |
| Gm26672       | chr18:37746558-37768242   | 0.6800   | 0.9641  | 0.5038  | 0.346267 |
| Itgb5         | chr16:33829664-33949153   | 0.3643   | 0.7320  | 1.0066  | 0.395301 |
| Phax          | chr18:56562442-56587712   | 27.2237  | 24.5800 | -0.1474 | 0.356161 |
| Gm11672       | chr11:106126335-106127351 | 2.7776   | 1.4011  | -0.9873 | 0.142083 |
| Fbxo42        | chr4:141147912-141204062  | 6.7657   | 5.8944  | -0.1989 | 0.432752 |
| Gm26925       | chr5:144110815-144111772  | 2.1246   | 1.2790  | -0.7322 | 0.172460 |
| Terf2         | chr8:107069399-107096547  | 9.4280   | 10.6820 | 0.1802  | 0.172053 |
| Psmb2         | chr4:126677629-126709714  | 91.1041  | 83.1858 | -0.1312 | 0.409911 |
| Zfp277        | chr12:40315045-40445790   | 11.9783  | 13.9727 | 0.2222  | 0.295791 |
| Smarb1        | chr10:75896768-75921617   | 10.6065  | 9.6603  | -0.1348 | 0.393228 |
| Zbtb7a        | chr10:81135219-81152995   | 7.7086   | 8.9295  | 0.2121  | 0.440907 |
| Cct4          | chr11:22990518-23003780   | 92.0323  | 83.3886 | -0.1423 | 0.562254 |
| Gm12264       | chr11:59775285-59780321   | 13.9457  | 19.4301 | 0.4785  | 0.345523 |
| Mir142b       | chr11:87756863-87756927   | 110.3338 | 80.0601 | -0.4627 | 0.383735 |
| Arhgap27os3   | chr11:103344752-103350124 | 15.5962  | 13.1063 | -0.2509 | 0.577244 |
| Ccdc47        | chr11:106197407-106216344 | 14.6193  | 13.4902 | -0.1160 | 0.221020 |
| Rptoros       | chr11:119820811-119834365 | 1.6186   | 0.7093  | -1.1902 | 0.408880 |
| Ccdc137       | chr11:120458114-120464358 | 9.7083   | 8.6831  | -0.1610 | 0.128190 |
| Idnk          | chr13:58157648-58164693   | 31.4808  | 35.9872 | 0.1930  | 0.295263 |
| Slc30a5       | chr13:100802648-100833427 | 25.1549  | 28.3728 | 0.1737  | 0.321499 |
| Ppwd1         | chr13:104205120-104228844 | 13.0957  | 11.5880 | -0.1765 | 0.127437 |
| Gbp9          | chr5:105078393-105139539  | 63.4657  | 70.4937 | 0.1515  | 0.366994 |
| Ccdc62        | chr5:123927417-123969895  | 1.3972   | 1.8763  | 0.4253  | 0.357524 |
| Rhbdd2        | chr5:135632617-135646448  | 2.9302   | 2.3939  | -0.2916 | 0.473605 |
| Chchd3        | chr6:32790975-33060260    | 34.3554  | 30.4458 | -0.1743 | 0.538647 |
| Tgoln1        | chr6:72608431-72617000    | 43.4483  | 47.2100 | 0.1198  | 0.076434 |
| Htra2         | chr6:83051265-83055273    | 19.4826  | 22.2837 | 0.1938  | 0.355671 |
| Eogt          | chr6:97110023-97149182    | 6.0270   | 7.1032  | 0.2370  | 0.314413 |
| Zfp94         | chr7:24301703-24316666    | 3.4627   | 2.8062  | -0.3033 | 0.296714 |
| Pafah1b3      | chr7:25295048-25297986    | 4.2392   | 5.2768  | 0.3159  | 0.127948 |
| Rccd1         | chr7:80316595-80324454    | 7.6655   | 6.4684  | -0.2450 | 0.468237 |
| Alpk3         | chr7:81057599-81105612    | 0.3609   | 0.1918  | -0.9121 | 0.203665 |
| Gm17136       | chr7:126176123-126176534  | 3.6458   | 1.6783  | -1.1192 | 0.303641 |
| Zranb1        | chr7:132931141-132986391  | 21.9268  | 20.2754 | -0.1130 | 0.264120 |
| Rwdd4a        | chr8:47533663-47552955    | 12.7313  | 10.9581 | -0.2164 | 0.471927 |
| Ifi30         | chr8:70762773-70766663    | 19.3421  | 23.0521 | 0.2532  | 0.285609 |
| Itfg1         | chr8:85717556-85840949    | 25.8376  | 28.6995 | 0.1516  | 0.196686 |
| Has3          | chr8:106870241-106884566  | 7.6670   | 6.8820  | -0.1558 | 0.314385 |
| Coro2b        | chr9:62419491-62537044    | 1.0677   | 0.7978  | -0.4204 | 0.362935 |
| NA            | chr9:108104964-108118343  | 1.3828   | 0.9018  | -0.6167 | 0.477482 |
| Sacm1l        | chr9:123529881-123592598  | 38.3063  | 42.5433 | 0.1514  | 0.330536 |
| Tonsl         | chr15:76626001-76639958   | 5.9034   | 5.1663  | -0.1924 | 0.263029 |



|               |                           |          |          |         |          |
|---------------|---------------------------|----------|----------|---------|----------|
| Ankrd54       | chr15:79053093-79062893   | 10.2852  | 9.0414   | -0.1859 | 0.407316 |
| Samm50        | chr15:84192232-84214303   | 55.0812  | 50.8985  | -0.1139 | 0.177439 |
| 4930570N19Rik | chr14:26628406-26638183   | 7.4769   | 5.4522   | -0.4556 | 0.022316 |
| Traj24        | chr14:54195637-54195700   | 109.7505 | 75.4081  | -0.5414 | 0.499216 |
| Oaz1-ps       | chr17:17345455-17346140   | 15.0225  | 12.1027  | -0.3118 | 0.231858 |
| Zfp820        | chr17:21816875-21845759   | 0.1373   | 0.2993   | 1.1243  | 0.107553 |
| Zfp81         | chr17:33329341-33358878   | 4.4818   | 3.9438   | -0.1845 | 0.228178 |
| Gm20427       | chr17:34026033-34031572   | 46.6822  | 42.8252  | -0.1244 | 0.456754 |
| Ntan1         | chr16:13819250-13835451   | 29.9183  | 33.2196  | 0.1510  | 0.052275 |
| Tmem41a       | chr16:21934326-21947552   | 2.2196   | 3.2228   | 0.5380  | 0.203301 |
| 4933407L21Rik | chr1:85928482-85940624    | 1.2787   | 2.0573   | 0.6860  | 0.159148 |
| Kdsr          | chr1:106720409-106759742  | 8.6117   | 7.7435   | -0.1533 | 0.242488 |
| Ly9           | chr1:171588623-171607410  | 63.9479  | 69.5147  | 0.1204  | 0.117475 |
| Gm6457        | chr18:14570100-14570915   | 1.4920   | 0.6678   | -1.1598 | 0.381591 |
| Prpf18        | chr2:4622057-4652113      | 22.5656  | 25.0926  | 0.1531  | 0.308048 |
| Nelfb         | chr2:25199711-25211489    | 33.3010  | 30.1596  | -0.1430 | 0.505660 |
| Pmpca         | chr2:26389338-26397122    | 27.3258  | 25.0608  | -0.1248 | 0.411905 |
| Wdr5          | chr2:27515156-27536535    | 19.8901  | 18.1994  | -0.1282 | 0.255669 |
| Ncoa6         | chr2:155390655-155473894  | 3.7160   | 3.1383   | -0.2438 | 0.552776 |
| Ube2q1        | chr3:89773608-89783997    | 40.9187  | 45.3571  | 0.1486  | 0.294760 |
| Tspan2        | chr3:102734528-102772292  | 1.8077   | 1.4419   | -0.3263 | 0.086750 |
| Ptbp2         | chr3:119718741-119783388  | 15.1567  | 13.4406  | -0.1734 | 0.425001 |
| Zranb2        | chr3:157534159-157548390  | 36.9498  | 33.0933  | -0.1590 | 0.545904 |
| Creb3         | chr4:43562331-43567060    | 17.8912  | 20.7215  | 0.2119  | 0.383001 |
| Hook1         | chr4:95967239-96025413    | 8.7689   | 9.8014   | 0.1606  | 0.242403 |
| Cc2d1b        | chr4:108619939-108634123  | 37.7893  | 35.4796  | -0.0910 | 0.147152 |
| Aldh4a1       | chr4:139622865-139649690  | 5.9099   | 5.2324   | -0.1757 | 0.123645 |
| Cep104        | chr4:153975193-154008732  | 4.0721   | 3.4921   | -0.2217 | 0.251738 |
| Jam3          | chr9:27097384-27155421    | 0.3017   | 0.6139   | 1.0250  | 0.163825 |
| Usp27x        | chrX:7371275-7375830      | 0.5670   | 0.9467   | 0.7395  | 0.194394 |
| Rgmb          | chr17:15806252-15826586   | 0.5809   | 1.0566   | 0.8630  | 0.167697 |
| Gm13402       | chr2:29349841-29396459    | 8.3133   | 14.1983  | 0.7722  | 0.339426 |
| Csf3r         | chr4:126024549-126044440  | 0.1282   | 0.2947   | 1.2004  | 0.205587 |
| NA            | chr2:13557847-13560324    | 0.2067   | 0.4821   | 1.2217  | 0.178181 |
| Rarres1       | chr3:67478885-67515523    | 0.9144   | 0.3881   | -1.2364 | 0.494834 |
| Ndel1         | chr11:68821433-68871858   | 15.2728  | 17.5314  | 0.1990  | 0.318670 |
| Gm11766       | chr11:119938510-119942074 | 1.8110   | 1.3361   | -0.4388 | 0.247714 |
| Msh3          | chr13:92211880-92355003   | 15.9325  | 18.0979  | 0.1839  | 0.328427 |
| 2610021A01Rik | chr7:41599260-41628533    | 13.8228  | 12.5265  | -0.1421 | 0.191273 |
| Otud4         | chr8:79639617-79677724    | 48.1157  | 45.2125  | -0.0898 | 0.326871 |
| Snupn         | chr9:56950877-56983206    | 8.5862   | 6.9607   | -0.3028 | 0.257728 |
| Grina         | chr15:76246806-76249904   | 30.1550  | 35.7996  | 0.2475  | 0.488339 |
| Nckap1l       | chr15:103453824-103498800 | 126.2326 | 119.5583 | -0.0784 | 0.260285 |
| Psmb9         | chr17:34181987-34187764   | 44.1284  | 48.3996  | 0.1333  | 0.231188 |
| Dennd1c       | chr17:57066055-57078510   | 58.6934  | 52.9448  | -0.1487 | 0.548975 |
| Fkbp2         | chr19:6977740-6980461     | 14.9936  | 18.7201  | 0.3202  | 0.234717 |
| NA            | chr1:138977656-138979240  | 3.7556   | 1.5696   | -1.2586 | 0.306664 |
| Esr1          | chr10:4611592-5005614     | 0.2038   | 0.3082   | 0.5971  | 0.201797 |
| Gm11788       | chr11:120489405-120492394 | 0.5320   | 1.4983   | 1.4937  | 0.138172 |
| S100a9        | chr3:90692631-90695721    | 2.6999   | 10.9815  | 2.0241  | 0.310854 |
| Eif2s2        | chr2:154871409-154892935  | 9.5918   | 8.2994   | -0.2088 | 0.543652 |
| Rplp0         | chr5:115559466-115563727  | 403.7777 | 458.9214 | 0.1847  | 0.522485 |
| Ap1m1         | chr8:72240017-72257385    | 25.2426  | 22.8303  | -0.1449 | 0.424295 |
| Mrpl9         | chr3:94443317-94451130    | 20.1327  | 23.0027  | 0.1923  | 0.311565 |
| Calml4        | chr9:62858103-62875918    | 0.4469   | 1.0851   | 1.2796  | 0.401935 |
| Yars          | chr4:129189759-129219607  | 7.4316   | 8.5359   | 0.1999  | 0.344468 |
| Cenpw         | chr10:30196010-30200540   | 1.5988   | 2.8550   | 0.8365  | 0.310668 |
| Rnf5          | chr17:34601090-34603690   | 4.1628   | 5.6293   | 0.4354  | 0.318914 |
| Sdhd          | chr4:140961202-140979193  | 47.5443  | 53.2972  | 0.1648  | 0.348875 |
| Nagk          | chr6:83794981-83803420    | 3.1726   | 3.9830   | 0.3282  | 0.302197 |
| Il17ra        | chr6:120463196-120483727  | 56.4044  | 51.6258  | -0.1277 | 0.532688 |
| Megf11        | chr9:64385625-64709205    | 1.7692   | 1.3516   | -0.3884 | 0.624456 |
| Hdhd2         | chr18:76930125-76972902   | 7.9847   | 9.4293   | 0.2399  | 0.432952 |
| Gm26841       | chr2:152694732-152696692  | 24.2778  | 20.7035  | -0.2298 | 0.553859 |
| Rae1          | chr2:173000116-173015739  | 34.8870  | 31.4287  | -0.1506 | 0.477755 |
| Gm10451       | chr12:76444559-76451336   | 4.1314   | 2.4471   | -0.7556 | 0.438340 |
| Fabp3         | chr4:130308594-130315463  | 0.7114   | 1.5808   | 1.1520  | 0.278976 |
| Apool         | chrX:112311333-112372755  | 5.3749   | 6.3769   | 0.2466  | 0.184774 |
| Acad8         | chr9:26974134-26999566    | 6.4726   | 5.3643   | -0.2709 | 0.542497 |
| Xpot          | chr10:121587379-121626316 | 16.0574  | 14.6610  | -0.1313 | 0.391262 |
| Naglu         | chr11:101070011-101077672 | 7.4838   | 8.7403   | 0.2239  | 0.061830 |

|               |                           |         |         |         |          |
|---------------|---------------------------|---------|---------|---------|----------|
| Ccr10         | chr11:101172996-101175443 | 1.4896  | 0.7582  | -0.9742 | 0.368250 |
| Nom1          | chr5:29434663-29453506    | 15.7341 | 14.4377 | -0.1241 | 0.212537 |
| Tspyl2        | chrX:152336851-152342425  | 14.5096 | 12.5124 | -0.2136 | 0.511837 |
| 1700030C12Rik | chr11:23497752-23499661   | 0.9512  | 1.8245  | 0.9397  | 0.205913 |
| Tspyl1        | chr10:34282189-34284885   | 31.1003 | 34.9376 | 0.1679  | 0.331387 |
| Tlr6          | chr5:64953105-64960048    | 3.3324  | 4.2999  | 0.3677  | 0.271430 |
| Foxm1         | chr6:128362966-128375893  | 2.9442  | 3.6552  | 0.3121  | 0.434508 |
| Zw10          | chr9:49055580-49078772    | 26.4577 | 23.6836 | -0.1598 | 0.450033 |
| Fas           | chr19:34290658-34327770   | 19.6238 | 22.5512 | 0.2006  | 0.297747 |
| Synpo         | chr18:60593972-60660142   | 1.4304  | 1.1343  | -0.3347 | 0.399029 |
| Rab16         | chr2:25583017-25608521    | 13.4201 | 12.0946 | -0.1500 | 0.453865 |
| Plagl1        | chr10:13090690-13131694   | 0.2605  | 0.4864  | 0.9007  | 0.355937 |
| Zfp869        | chr8:69706331-69710724    | 27.4908 | 31.3985 | 0.1917  | 0.247708 |
| 2210408F21Rik | chr6:31220350-31337404    | 1.5112  | 0.7530  | -1.0050 | 0.389768 |
| Rfc1          | chr5:65261851-65335670    | 20.8914 | 19.4429 | -0.1037 | 0.187344 |
| Gm3752        | chr14:7466361-7483762     | 0.6905  | 0.3108  | -1.1518 | 0.349697 |
| Caskin1       | chr17:24488782-24508905   | 0.7809  | 0.5474  | -0.5127 | 0.387296 |
| Capn10        | chr1:92934375-92947941    | 3.0557  | 3.7875  | 0.3097  | 0.345733 |
| Sppl2b        | chr10:80855274-80868705   | 8.9620  | 7.4158  | -0.2732 | 0.513153 |
| Sbf2          | chr7:110308012-110614922  | 1.0612  | 0.8226  | -0.3674 | 0.548813 |
| Chst2         | chr9:95400928-95407270    | 11.5202 | 13.2349 | 0.2002  | 0.464544 |
| Zc4h2         | chrX:95639192-95658509    | 2.4601  | 1.6311  | -0.5929 | 0.577947 |
| Ebpl          | chr14:61339762-61360445   | 7.0485  | 8.4127  | 0.2553  | 0.120867 |
| Pknx1         | chr17:31564748-31607680   | 12.6688 | 11.6319 | -0.1232 | 0.327727 |
| Cfap43        | chr19:47737560-47919287   | 0.5327  | 0.3372  | -0.6597 | 0.334363 |
| Pard6g        | chr18:80046894-80119640   | 3.8138  | 4.6943  | 0.2997  | 0.262163 |
| Pigu          | chr2:155278242-155357430  | 3.8336  | 3.4233  | -0.1633 | 0.150177 |
| Chd6          | chr2:160946977-161109075  | 14.4558 | 13.4825 | -0.1006 | 0.398465 |
| S100a11       | chr3:93520487-93526287    | 4.3370  | 6.6067  | 0.6072  | 0.330551 |
| Gm25687       | chr4:54468332-54468611    | 11.8298 | 17.7182 | 0.5828  | 0.302214 |
| Ckap4         | chr10:84526304-84534036   | 0.6833  | 0.3017  | -1.1796 | 0.364102 |
| D230017M19Rik | chr1:72236464-72274869    | 0.1308  | 0.2774  | 1.0845  | 0.252142 |
| Clcf1         | chr19:4214237-4223490     | 7.5065  | 6.6459  | -0.1757 | 0.077790 |
| B3gnt2        | chr11:22834746-22860961   | 69.7187 | 75.5595 | 0.1161  | 0.070409 |
| Fam161b       | chr12:84345308-84361833   | 0.6738  | 0.4656  | -0.5332 | 0.112255 |
| Zbtb42        | chr12:112678827-112682747 | 2.5068  | 3.2215  | 0.3619  | 0.340469 |
| Agtbp1        | chr13:59449536-59585227   | 7.5954  | 6.9004  | -0.1384 | 0.433164 |
| Vps4a         | chr8:107031221-107045755  | 30.3222 | 27.8346 | -0.1235 | 0.261033 |
| Zfp598        | chr17:24669751-24682015   | 17.7448 | 17.9215 | -0.1398 | 0.354608 |
| Map4k2        | chr19:6341134-6355615     | 66.7854 | 62.1028 | -0.1049 | 0.499262 |
| Apc           | chr18:34220923-34322189   | 12.2575 | 11.2621 | -0.1222 | 0.495268 |
| Dapl1         | chr2:59484652-59505020    | 5.0408  | 3.1459  | -0.6802 | 0.450737 |
| Ppm1l         | chr3:69316860-69560802    | 3.2121  | 2.7933  | -0.2016 | 0.358317 |
| Cyb561d1      | chr3:108195686-108201212  | 9.1160  | 8.2141  | -0.1503 | 0.242355 |
| Tex38         | chr4:115779833-115781018  | 1.7709  | 0.7018  | -1.3353 | 0.385535 |
| Gm11221       | chr4:69691977-69692574    | 1.0879  | 2.2577  | 1.0533  | 0.158299 |
| Gga1          | chr15:78877189-78894585   | 13.2369 | 11.4233 | -0.2126 | 0.514783 |
| Gm26885       | chr17:29461895-29491925   | 37.0372 | 42.9975 | 0.2153  | 0.476427 |
| Abtb2         | chr2:103566309-103718423  | 17.2526 | 15.8742 | -0.1201 | 0.359989 |
| Tubgcp4       | chr2:121170653-121198770  | 21.8649 | 20.2618 | -0.1099 | 0.397497 |
| AU022252      | chr4:119203569-119232712  | 3.5103  | 3.1349  | -0.1632 | 0.142432 |
| Gpr157        | chr4:150087364-150105927  | 0.4958  | 0.3074  | -0.6895 | 0.380467 |
| Zfp750        | chr11:121510977-121519333 | 0.9647  | 0.5164  | -0.9015 | 0.470572 |
| Gcnt2         | chr13:40859767-40960891   | 0.3433  | 0.1790  | -0.9394 | 0.389506 |
| 4931422A03Rik | chr2:103966942-104028361  | 0.9268  | 1.5924  | 0.7809  | 0.302388 |
| Txndc9        | chr1:37983866-37997346    | 13.2946 | 14.8937 | 0.1639  | 0.281806 |
| Dapp1         | chr3:137931006-137981545  | 33.4256 | 36.7311 | 0.1361  | 0.123584 |
| Mllt6         | chr11:97663413-97685463   | 68.9432 | 64.1124 | -0.1048 | 0.510817 |
| Slc9a1        | chr4:133369705-133423702  | 4.9333  | 4.1858  | -0.2371 | 0.434385 |
| Gas2l3        | chr10:89408822-89443967   | 1.9065  | 2.4422  | 0.3572  | 0.429323 |
| Gm527         | chr12:64917910-64924591   | 2.4751  | 3.9254  | 0.6654  | 0.312244 |
| Carm1         | chr9:21546893-21589487    | 13.2421 | 11.9336 | -0.1501 | 0.360566 |
| Mfsd8         | chr3:40818069-40846885    | 6.2752  | 5.4230  | -0.2106 | 0.181749 |
| Btbd8         | chr5:107437996-107491628  | 2.1186  | 1.3203  | -0.6823 | 0.376120 |
| Rec8          | chr14:55618036-55625395   | 4.5759  | 5.8652  | 0.3581  | 0.523913 |
| Nfkib1        | chr7:28758250-28767512    | 11.0016 | 12.8069 | 0.2192  | 0.139733 |
| Dok4          | chr8:94863827-94876312    | 2.1863  | 2.8575  | 0.3862  | 0.192888 |
| Spata1        | chr3:146457202-146499753  | 3.4358  | 2.8929  | -0.2481 | 0.153690 |
| Efcab9        | chr11:32522750-32532081   | 2.3264  | 1.3661  | -0.7681 | 0.265191 |
| Tesc          | chr5:118027742-118061878  | 17.0619 | 14.4654 | -0.2382 | 0.438989 |
| Gpc2          | chr5:138264951-138280005  | 0.9281  | 1.1796  | 0.3459  | 0.230683 |

|            |                           |          |          |         |          |
|------------|---------------------------|----------|----------|---------|----------|
| Gcfc2      | chr6:81923668-81959915    | 4.5375   | 5.3156   | 0.2283  | 0.363658 |
| Dhx34      | chr7:16197146-16222037    | 12.3318  | 11.0158  | -0.1628 | 0.437591 |
| Gtf2h1     | chr7:46796102-46823800    | 38.5190  | 35.1025  | -0.1340 | 0.466499 |
| Abcb10     | chr8:123952458-123983122  | 1.9559   | 2.5526   | 0.3841  | 0.373186 |
| Ice2       | chr9:69397905-69433122    | 7.9682   | 7.1505   | -0.1562 | 0.423395 |
| Vaultrc5   | chr18:36801865-36802008   | 37.3187  | 53.9886  | 0.5328  | 0.567812 |
| Sike1      | chr3:102995727-103003914  | 14.1192  | 12.8648  | -0.1342 | 0.271500 |
| Acer2      | chr4:86874395-86934822    | 0.9135   | 1.1779   | 0.3667  | 0.147126 |
| Stag1      | chr9:100597797-100958545  | 21.1639  | 19.8235  | -0.0944 | 0.304818 |
| Las1l      | chrX:95935334-95956962    | 4.6499   | 5.4707   | 0.2345  | 0.395704 |
| Rabggtb    | chr3:153907288-153912966  | 48.4671  | 43.5169  | -0.1554 | 0.475246 |
| Mgst2      | chr3:51660359-51682675    | 14.2370  | 16.1680  | 0.1835  | 0.317041 |
| Tax1bp3    | chr11:73177082-73183162   | 0.1642   | 0.4150   | 1.3379  | 0.331801 |
| Tbpl1      | chr10:22703878-22731938   | 16.3578  | 18.8166  | 0.2020  | 0.398189 |
| Stat6      | chr10:127642985-127660957 | 17.1383  | 67.6220  | -0.1131 | 0.532263 |
| Pik3ip1    | chr11:3330400-3342971     | 16.1053  | 14.5783  | -0.1437 | 0.424093 |
| Gm11508    | chr11:88011990-88048006   | 53.8452  | 46.1674  | -0.2219 | 0.404510 |
| NA         | chr5:73193827-73256588    | 24.9113  | 21.6633  | -0.2015 | 0.498367 |
| Bax        | chr7:45461694-45466898    | 58.1926  | 52.7249  | -0.1423 | 0.270249 |
| Irf2       | chr8:46739744-46847458    | 13.2490  | 11.2621  | -0.2344 | 0.500664 |
| Clgn       | chr8:83389866-83428552    | 0.3478   | 0.1247   | -1.4796 | 0.334898 |
| Armcx5     | chrX:135742732-135747322  | 8.2245   | 7.3148   | -0.1691 | 0.288386 |
| Adsl       | chr15:80948489-80970947   | 26.5660  | 24.2957  | -0.1289 | 0.455377 |
| Gm26637    | chr17:78882041-78892500   | 4.2296   | 5.3989   | 0.3521  | 0.352323 |
| Mir1306    | chr16:18284238-18284317   | 53.6875  | 38.2535  | -0.4890 | 0.239880 |
| Btrc       | chr19:45363733-45533341   | 4.2116   | 3.7384   | -0.1719 | 0.006630 |
| Gm16283    | chr18:49755793-49757189   | 4.5925   | 2.6961   | -0.7684 | 0.485986 |
| Skida1     | chr2:18040675-18049051    | 0.5647   | 0.3591   | -0.6532 | 0.283588 |
| Dnajc10    | chr2:80315465-80354043    | 22.9921  | 25.2213  | 0.1335  | 0.140079 |
| Ssr3       | chr3:65379654-65392623    | 43.6412  | 40.5369  | -0.1065 | 0.405956 |
| Akap6      | chr12:52699382-53151015   | 0.0480   | 0.1363   | 1.5074  | 0.267487 |
| NA         | chrX:12134458-12160346    | 2.8628   | 4.7332   | 0.7254  | 0.256745 |
| Epb4.114a  | chr18:33796326-34007206   | 1.0881   | 1.6173   | 0.5718  | 0.330489 |
| Tbxa2r     | chr10:81328731-81335171   | 13.0419  | 10.7293  | -0.2816 | 0.527415 |
| Txndc15    | chr13:55714649-55726221   | 22.9295  | 19.2296  | -0.2539 | 0.556321 |
| Trav17     | chr14:53806524-53807113   | 5.6658   | 2.7918   | -1.0211 | 0.268604 |
| Fubp3      | chr2:31572650-31617526    | 9.9133   | 11.1668  | 0.1718  | 0.125266 |
| Myo15b     | chr11:115861611-115892603 | 0.0573   | 0.1290   | 1.1706  | 0.231900 |
| Fhod1      | chr8:105329162-105347953  | 6.6848   | 5.7343   | -0.2213 | 0.519445 |
| Sh3gfb2    | chr2:30344808-30359337    | 25.1335  | 22.8096  | -0.1400 | 0.482218 |
| Gm26835    | chr10:13967023-14007405   | 7.5365   | 6.1235   | -0.2995 | 0.567770 |
| Pitpnb     | chr5:111330762-111388359  | 10.4539  | 9.2790   | -0.1720 | 0.120362 |
| Eci1       | chr17:24426682-24439316   | 17.9211  | 21.5801  | 0.2680  | 0.360004 |
| Ube2w      | chr1:16540789-16619489    | 4.1859   | 4.8859   | 0.2231  | 0.213834 |
| Fam135a    | chr1:24010757-24100341    | 0.0651   | 0.1734   | 1.4141  | 0.362770 |
| Acap3      | chr4:155891821-155907251  | 4.9891   | 5.8294   | 0.2246  | 0.310262 |
| Rps19-ps11 | chr10:43373487-43373920   | 2.1688   | 0.8078   | -1.4248 | 0.471986 |
| Tubgcp3    | chr8:12614276-12672248    | 16.0512  | 14.9761  | -0.1000 | 0.222281 |
| Pafah2     | chr4:134396319-134427413  | 0.9654   | 0.6496   | -0.5715 | 0.328181 |
| Metap2     | chr10:93858488-93897093   | 11.9430  | 13.2706  | 0.1521  | 0.254806 |
| Arhgap9    | chr10:127323726-127329943 | 125.9778 | 118.1483 | -0.0926 | 0.354229 |
| Sertad2    | chr11:20543252-20653021   | 7.2719   | 8.3815   | 0.2049  | 0.329795 |
| Ypel2      | chr11:86936424-86993707   | 6.6909   | 5.8245   | -0.2001 | 0.390896 |
| Fam195b    | chr11:120542887-120549727 | 26.5318  | 22.7477  | -0.2220 | 0.475458 |
| Pacs2      | chr12:113014507-113074401 | 11.7082  | 10.5200  | -0.1544 | 0.430076 |
| Vsig10     | chr5:117319265-117355005  | 3.6881   | 4.4521   | 0.2716  | 0.393893 |
| Zfyve20    | chr6:92186711-92214925    | 7.8148   | 8.9036   | 0.1882  | 0.285369 |
| Carkd      | chr8:11497505-11514960    | 13.5649  | 12.2466  | -0.1475 | 0.322905 |
| Wdfy2      | chr14:62837689-62956886   | 7.7209   | 9.1851   | 0.2505  | 0.123689 |
| Zfp946     | chr17:22424221-22456689   | 0.7389   | 1.0964   | 0.5693  | 0.315858 |
| Ifnar2     | chr16:91372782-91405589   | 38.7955  | 36.1282  | -0.1028 | 0.242325 |
| Scly       | chr1:91298337-91321075    | 8.8161   | 10.0262  | 0.1856  | 0.256286 |
| Ppp1r15b   | chr1:133131142-133139783  | 41.0342  | 44.5963  | 0.1201  | 0.167799 |
| Fkbp7      | chr2:76663043-76673116    | 0.7682   | 1.4530   | 0.9194  | 0.328392 |
| Pmepa1     | chr2:173224457-173276533  | 3.2698   | 4.1830   | 0.3553  | 0.480868 |
| Slc39a1    | chr3:90248171-90253612    | 11.3403  | 13.4790  | 0.2493  | 0.395348 |
| Mllt11     | chr3:95219134-95228677    | 11.8010  | 10.0038  | -0.2384 | 0.436043 |
| Olfml3     | chr3:103722221-103738001  | 0.9555   | 0.6219   | -0.6195 | 0.512485 |
| Ddx20      | chr3:105678269-105687574  | 13.2506  | 11.9108  | -0.1538 | 0.350598 |
| Trp53inp1  | chr4:11156430-11174379    | 144.0519 | 155.4104 | 0.1095  | 0.218403 |
| Srrm1      | chr4:135320483-135353321  | 13.7777  | 12.6146  | -0.1272 | 0.405296 |

|               |                           |          |          |         |          |
|---------------|---------------------------|----------|----------|---------|----------|
| Gm26527       | chr13:93940989-93943015   | 0.9912   | 1.7394   | 0.8113  | 0.260707 |
| Snora70       | chrX:74272483-74272620    | 36.1995  | 23.9011  | -0.5989 | 0.427568 |
| Man2b2        | chr5:36806920-36830653    | 17.1410  | 15.3061  | -0.1633 | 0.464823 |
| Foxj2         | chr6:122819913-122845366  | 8.2424   | 7.1928   | -0.1965 | 0.505010 |
| NA            | chr7:27988274-28014115    | 7.1937   | 8.8198   | 0.2940  | 0.427533 |
| Acp5          | chr9:22126730-22135746    | 34.0556  | 38.7293  | 0.1855  | 0.362021 |
| Gpr174        | chrX:107255877-107296769  | 50.5363  | 46.1751  | -0.1302 | 0.554373 |
| Cox15         | chr19:43733253-43753000   | 8.0669   | 9.0996   | 0.1738  | 0.072150 |
| Dclre1a       | chr19:56529160-56548222   | 3.8925   | 4.4835   | 0.2039  | 0.091733 |
| Ppie          | chr4:123127114-123139951  | 19.1374  | 22.6974  | 0.2461  | 0.390354 |
| 9230110C19Rik | chr9:8021671-8042823      | 0.2684   | 0.6882   | 1.3587  | 0.220669 |
| Ip6k1         | chr9:108002500-108048780  | 37.1233  | 34.5408  | -0.1040 | 0.446154 |
| Plk4          | chr3:40800018-40816883    | 6.9531   | 7.9593   | 0.1950  | 0.317809 |
| Pnpo          | chr11:96937824-96943986   | 10.3129  | 12.0920  | 0.2296  | 0.324175 |
| Galr2         | chr11:116280938-116283938 | 0.4834   | 0.2510   | -0.9452 | 0.164069 |
| Uprt          | chrX:104482817-104507490  | 4.8823   | 3.9235   | -0.3154 | 0.362296 |
| Dennd1b       | chr1:138963435-139176043  | 15.0729  | 14.1365  | -0.0925 | 0.294565 |
| Gm25835       | chr11:69668851-69668995   | 55.7643  | 78.0101  | 0.4843  | 0.561921 |
| Rrm2          | chr12:24708240-24714146   | 25.7969  | 28.9589  | 0.1668  | 0.362089 |
| Tbca          | chr13:94788942-94842899   | 32.3862  | 41.5548  | 0.3596  | 0.483859 |
| Tapt1         | chr5:44175163-44226606    | 37.8650  | 35.0355  | -0.1120 | 0.376766 |
| Sppl3         | chr5:115011136-115098790  | 10.6326  | 9.3430   | -0.1865 | 0.512822 |
| Trbv13-1      | chr6:41116035-41116468    | 96.4852  | 113.1916 | 0.2304  | 0.452350 |
| Etnk1         | chr6:143167229-143208542  | 46.6303  | 43.8001  | -0.0903 | 0.324203 |
| Mypop         | chr7:18991244-19001766    | 3.6609   | 2.8377   | -0.3675 | 0.267273 |
| Blvrb         | chr7:27447977-27466144    | 1.6636   | 2.4099   | 0.5347  | 0.177625 |
| Dcun1d2       | chr8:13255962-13288126    | 10.9741  | 12.8442  | 0.2270  | 0.386750 |
| Gm17484       | chr8:25754508-25769704    | 7.0323   | 8.7243   | 0.3110  | 0.374590 |
| Oaf           | chr9:43221277-43239816    | 1.0338   | 0.6012   | -0.7820 | 0.436707 |
| Csk           | chr9:57626646-57645653    | 125.5417 | 116.8364 | -0.1037 | 0.505425 |
| Smc1a         | chrX:152016427-152062694  | 54.6395  | 59.5539  | 0.1242  | 0.291443 |
| 1110038F14Rik | chr15:76948538-76950729   | 24.8852  | 21.9109  | -0.1836 | 0.161749 |
| Zswim8        | chr14:20707551-20723618   | 19.8197  | 17.6948  | -0.1636 | 0.569804 |
| Snx9          | chr17:5841327-5931033     | 15.7739  | 18.2274  | 0.2086  | 0.385412 |
| Tgif1         | chr17:70844204-70853546   | 10.9360  | 12.7266  | 0.2188  | 0.403492 |
| Hibch         | chr1:52845012-52920986    | 11.6784  | 10.1422  | -0.2035 | 0.359237 |
| Coq10b        | chr1:55052769-55072701    | 11.1107  | 13.6994  | 0.3022  | 0.450631 |
| Rnasel        | chr1:153749425-153764221  | 14.2361  | 15.9010  | 0.1596  | 0.337435 |
| Nvl           | chr1:181093422-181144157  | 30.4043  | 28.0345  | -0.1171 | 0.303825 |
| Zfp397        | chr18:23954687-23964671   | 31.9032  | 29.2267  | -0.1264 | 0.478833 |
| Rif1          | chr2:52072836-52122383    | 33.1155  | 30.7204  | -0.1083 | 0.487446 |
| Gm24451       | chr2:130276236-130276369  | 17.3628  | 10.2787  | -0.7563 | 0.381339 |
| A930019D19Rik | chr2:146259285-146267160  | 0.4387   | 1.1126   | 1.3427  | 0.267953 |
| NA            | chr4:32243732-32246475    | 4.0339   | 3.2231   | -0.3237 | 0.377258 |
| Snacp3        | chr4:83417723-83467676    | 24.7252  | 22.6186  | -0.1285 | 0.496469 |
| Tnfrsf1b      | chr4:145213462-145246870  | 100.0090 | 113.4761 | 0.1823  | 0.526221 |
| Gm10343       | chr16:10801368-10801716   | 0.7978   | 2.3711   | 1.5715  | 0.239388 |
| Gm16170       | chr11:48843647-48853493   | 0.2209   | 0.3880   | 0.8131  | 0.070647 |
| B4galnt2      | chr11:95865942-95914891   | 0.3225   | 0.7785   | 1.2714  | 0.246780 |
| Atp5d         | chr10:80138631-80145818   | 50.7976  | 45.7948  | -0.1496 | 0.497807 |
| Gm12735       | chr11:3193515-3194263     | 3.3584   | 1.6128   | -1.0583 | 0.542542 |
| Pigl          | chr11:62458459-62514417   | 3.3201   | 4.2424   | 0.3537  | 0.303513 |
| Gm11707       | chr11:106972057-106973090 | 7.5643   | 10.1789  | 0.4283  | 0.058495 |
| Pfkp          | chr13:6579767-6648777     | 29.2054  | 27.3936  | -0.0924 | 0.396038 |
| Utp15         | chr13:98246844-98262992   | 21.0854  | 18.6319  | -0.1785 | 0.547956 |
| Ran           | chr5:129020068-129024323  | 34.5514  | 40.3024  | 0.2221  | 0.508524 |
| Gpr162        | chr6:124858443-124863917  | 0.9365   | 0.5755   | -0.7025 | 0.368318 |
| Cnot3         | chr7:3645289-3661108      | 11.1960  | 9.8537   | -0.1842 | 0.510461 |
| Stard10       | chr7:101317085-101346626  | 3.4869   | 4.4906   | 0.3650  | 0.409434 |
| Usp38         | chr8:80980733-81014906    | 42.8272  | 40.2839  | -0.0883 | 0.263649 |
| Zfp92         | chrX:73411095-73428385    | 0.2176   | 0.1244   | -0.8064 | 0.189559 |
| Dock5         | chr14:67751927-67933572   | 2.0619   | 1.7900   | -0.2040 | 0.173927 |
| Guca1b        | chr17:47385392-47392967   | 0.8967   | 0.5441   | -0.7207 | 0.242987 |
| Atg3          | chr16:45158784-45188538   | 18.3254  | 21.0479  | 0.1998  | 0.430823 |
| Gm16897       | chr1:194955758-194976959  | 1.0502   | 0.6233   | -0.7526 | 0.405207 |
| Rock1         | chr18:10064400-10181792   | 51.9882  | 57.0631  | 0.1344  | 0.384166 |
| Nrgn          | chr9:37544491-37552904    | 0.2530   | 0.5921   | 1.2268  | 0.220467 |
| Hnrnp3        | chr10:63014663-63024217   | 11.5775  | 10.0383  | -0.2058 | 0.486683 |
| Aifm1         | chrX:48474943-48513563    | 10.4485  | 12.2021  | 0.2238  | 0.413273 |
| Gm11175       | chr8:70699537-70700080    | 182.2160 | 213.5244 | 0.2288  | 0.579690 |
| Rab4a         | chr8:123805984-123835287  | 5.6069   | 4.4023   | -0.3489 | 0.377412 |

|               |                           |          |          |         |          |
|---------------|---------------------------|----------|----------|---------|----------|
| Gramd3        | chr18:56432131-56503792   | 17.4218  | 19.6291  | 0.1721  | 0.194454 |
| Snord82       | chr1:86356260-86356330    | 4.5757   | 12.3717  | 1.4350  | 0.177888 |
| Ndufs7        | chr10:80249120-80256794   | 21.2878  | 18.5917  | -0.1954 | 0.409754 |
| Sgk1          | chr10:21882183-21999903   | 4.2942   | 5.0984   | 0.2477  | 0.348368 |
| 1110002J07Rik | chr10:66912488-66920258   | 0.5145   | 0.9257   | 0.8475  | 0.434675 |
| Aff4          | chr11:53350832-53421830   | 16.5799  | 15.5492  | -0.0926 | 0.298724 |
| Luc7l3        | chr11:94287889-94321988   | 51.2910  | 48.1532  | -0.0911 | 0.399507 |
| Gm11619       | chr11:101353308-101353545 | 3.6815   | 1.5137   | -1.2822 | 0.323681 |
| Map4k5        | chr12:69803749-69893200   | 3.1243   | 2.6015   | -0.2642 | 0.515206 |
| Tmed8         | chr12:87166241-87200229   | 11.4816  | 10.5567  | -0.1212 | 0.286787 |
| Armc10        | chr5:21645812-21662694    | 21.3775  | 23.9488  | 0.1639  | 0.306214 |
| Zscan25       | chr5:145283342-145291469  | 10.2096  | 8.8494   | -0.2063 | 0.185576 |
| Cnbp          | chr6:87842614-87851106    | 152.7625 | 171.4393 | 0.1664  | 0.505127 |
| Ccdc106       | chr7:5056151-5060785      | 0.5468   | 0.8670   | 0.6649  | 0.241836 |
| Sertad1       | chr7:27486909-27490316    | 25.3443  | 22.0730  | -0.1994 | 0.440113 |
| Sgpp2         | chr1:78310345-78420286    | 4.1058   | 3.1749   | -0.3709 | 0.512299 |
| Spcs2-ps      | chr2:129378270-129379396  | 1.7938   | 0.8055   | -1.1550 | 0.391273 |
| Serpini1      | chr3:75557546-75643495    | 2.2707   | 2.7751   | 0.2894  | 0.311700 |
| Rnf115        | chr3:96727610-96791155    | 40.3455  | 37.4070  | -0.1091 | 0.193177 |
| Cd160         | chr3:96798762-96829351    | 9.5702   | 8.2055   | -0.2220 | 0.398318 |
| Usp33         | chr3:152346477-152393612  | 22.2867  | 20.6986  | -0.1067 | 0.319679 |
| Crocc         | chr4:141016636-141060550  | 2.2613   | 2.6978   | 0.2547  | 0.314870 |
| NA            | chr9:104084156-104102560  | 1.1460   | 0.6412   | -0.8377 | 0.351315 |
| Cnm2          | chr19:46761595-46878795   | 2.8869   | 2.3412   | -0.3022 | 0.346318 |
| Usp32         | chr11:84984441-85140161   | 10.8167  | 9.9461   | -0.1211 | 0.285150 |
| Srd5a3        | chr5:76140270-76155504    | 5.9854   | 7.1551   | 0.2575  | 0.489527 |
| Sp140         | chr1:85600377-85645037    | 11.0501  | 12.5845  | 0.1876  | 0.190592 |
| Gm16599       | chr5:136274995-136417894  | 2.2690   | 1.4226   | -0.6735 | 0.365533 |
| Socs6         | chr18:88665223-88927481   | 3.4650   | 3.0850   | -0.1676 | 0.125430 |
| Gm14718       | chrX:57200642-57204378    | 2.1503   | 3.8109   | 0.8256  | 0.247415 |
| Rab2Gos       | chr17:24528247-24528744   | 7.3380   | 17.0983  | 1.2204  | 0.165092 |
| 9630033F20Rik | chr6:127085115-127109550  | 6.0904   | 5.3329   | -0.1916 | 0.166785 |
| Clcn4-2       | chr7:7282315-7299511      | 29.2488  | 31.8005  | 0.1207  | 0.033321 |
| Anxa11        | chr14:25842182-25886804   | 6.7479   | 7.9213   | 0.2313  | 0.381172 |
| Stmn2         | chr3:8509526-8561604      | 0.1683   | 0.4562   | 1.4385  | 0.256541 |
| Gpatch2l      | chr12:86241889-86291414   | 14.9246  | 16.7387  | 0.1655  | 0.269346 |
| Efcab8        | chr2:153780878-153844752  | 0.2447   | 0.0903   | -1.4387 | 0.453217 |
| Noc4l         | chr5:110648417-110653417  | 15.7894  | 13.9191  | -0.1819 | 0.453787 |
| Cdk5rap3      | chr11:96907425-96916496   | 13.4287  | 15.0985  | 0.1691  | 0.246263 |
| Cish          | chr9:107296025-107302784  | 23.7206  | 20.9200  | -0.1813 | 0.654323 |
| Snx5          | chr2:144250122-144270906  | 62.4546  | 68.8758  | 0.1412  | 0.395331 |
| Phc1          | chr6:122317730-122340561  | 3.6682   | 3.1327   | -0.2277 | 0.318653 |
| Cenpi         | chrX:134308083-134362639  | 1.9692   | 2.5238   | 0.3580  | 0.421989 |
| Xrcc5         | chr1:72307420-72394952    | 30.5684  | 34.4484  | 0.1724  | 0.398943 |
| Tesk1         | chr4:43441938-43448064    | 6.6190   | 7.7026   | 0.2187  | 0.336768 |
| Smarcc2       | chr10:128459235-128490173 | 30.8740  | 28.1283  | -0.1344 | 0.533700 |
| Ssc4d         | chr5:135960210-135974531  | 0.6718   | 0.3807   | -0.8194 | 0.228229 |
| Cds2          | chr2:132263147-132312050  | 38.2109  | 35.8586  | -0.0917 | 0.427317 |
| Ighj2         | chr12:113429513-113429567 | 115.8509 | 79.6867  | -0.5399 | 0.489355 |
| Rpf1          | chr3:146506347-146521423  | 72.6860  | 65.3365  | -0.1538 | 0.519356 |
| Pdk2          | chr11:95026257-95041354   | 0.3374   | 0.6377   | 0.9184  | 0.259563 |
| Ddx54         | chr5:120613129-120628590  | 45.6838  | 42.3215  | -0.1103 | 0.474126 |
| Trim5         | chr7:104263385-104288094  | 14.6261  | 16.6598  | 0.1878  | 0.351810 |
| Tctex1d2      | chr16:32419701-32429099   | 0.3859   | 0.6653   | 0.7858  | 0.342575 |
| Itga3         | chr11:95044473-95076801   | 0.9636   | 0.6816   | -0.4995 | 0.422085 |
| Coasy         | chr11:101082564-101086619 | 8.9039   | 10.4592  | 0.2323  | 0.319742 |
| E2f8          | chr7:48866428-48881596    | 2.3310   | 2.8825   | 0.3064  | 0.391408 |
| Nat6          | chr9:107578886-107584048  | 3.4235   | 4.2727   | 0.3197  | 0.330340 |
| Dnajc19       | chr3:34056019-34081321    | 10.4869  | 9.3592   | -0.1641 | 0.388995 |
| Gm26838       | chr16:35805946-35808946   | 0.5271   | 1.1602   | 1.1382  | 0.242219 |
| Rtn4rl1       | chr11:75193782-75267769   | 3.6871   | 3.0840   | -0.2577 | 0.250012 |
| Gosr2         | chr11:103676848-103697898 | 39.0918  | 42.9168  | 0.1347  | 0.274621 |
| Uba52         | chr8:70508262-70510801    | 5.7980   | 4.6935   | -0.3049 | 0.085970 |
| 1700065D16Rik | chr9:95855551-95858320    | 1.2353   | 0.8182   | -0.5943 | 0.397815 |
| Dpp7          | chr2:25352275-25356359    | 5.3837   | 4.4707   | -0.2681 | 0.403524 |
| Gm16272       | chr6:39584091-39592784    | 2.6209   | 4.9056   | 0.9044  | 0.169632 |
| Gm12316       | chr11:70611211-70613211   | 13.9576  | 10.2291  | -0.4484 | 0.343847 |
| Apobr         | chr7:126584941-126589112  | 2.5983   | 3.3073   | 0.3481  | 0.396951 |
| Asph          | chr4:9448068-9669344      | 0.0590   | 0.1013   | 0.7792  | 0.230217 |
| 6720427I07Rik | chr13:48535522-48537822   | 30.2753  | 27.1617  | -0.1566 | 0.472845 |
| Adamts3       | chr5:89673840-89883334    | 0.2441   | 0.1404   | -0.7973 | 0.216621 |

|               |                           |          |          |         |          |
|---------------|---------------------------|----------|----------|---------|----------|
| Scap          | chr9:110333287-110384946  | 23.3135  | 21.0836  | -0.1450 | 0.543787 |
| Rps6ka3       | chrX:159210306-159368244  | 12.5568  | 11.0940  | -0.1787 | 0.600492 |
| Ptpn7         | chr1:135132724-135145320  | 124.6547 | 135.2482 | 0.1177  | 0.323936 |
| Snx30         | chr4:59805839-59904737    | 3.9826   | 4.6483   | 0.2230  | 0.410048 |
| Tet1          | chr10:62804569-62899118   | 1.6871   | 1.4478   | -0.2207 | 0.455185 |
| D10Wsu102e    | chr10:83360220-83368835   | 23.1046  | 20.9550  | -0.1409 | 0.431175 |
| Cry1          | chr10:85131701-85185054   | 16.4681  | 14.8752  | -0.1468 | 0.352591 |
| Ascl4         | chr10:85928490-85946206   | 4.9848   | 6.2549   | 0.3274  | 0.081243 |
| Ulk1          | chr5:110784487-110810097  | 6.2861   | 5.3247   | -0.2395 | 0.521223 |
| Emc3          | chr6:113514873-113531638  | 27.8924  | 31.3447  | 0.1684  | 0.340062 |
| Mir343        | chr7:19386642-19386717    | 42.7359  | 27.6837  | -0.6264 | 0.430484 |
| Cdt1          | chr8:122568014-122573128  | 14.2310  | 16.4247  | 0.2068  | 0.323980 |
| C2cd2l        | chr9:44309236-44320282    | 3.1630   | 3.9699   | 0.3278  | 0.439018 |
| Ccpg1         | chr9:72985428-73016340    | 15.9582  | 17.9537  | 0.1700  | 0.371827 |
| L3mbtl2       | chr15:81663888-81688315   | 8.6374   | 7.8571   | -0.1366 | 0.232515 |
| Mettl17       | chr14:51884841-51893039   | 12.9835  | 14.7875  | 0.1877  | 0.348982 |
| Tnfsf11       | chr14:78277444-78308043   | 27.3615  | 30.7956  | 0.1706  | 0.299824 |
| Tfeb          | chr17:47737029-47792419   | 2.9398   | 3.5516   | 0.2728  | 0.397061 |
| Wash          | chr17:66111545-66120503   | 16.7306  | 18.6294  | 0.1551  | 0.066997 |
| Gm16565       | chr1:165781074-165789367  | 18.2574  | 15.9741  | -0.1927 | 0.522876 |
| Copa          | chr1:172082528-172122330  | 48.3169  | 52.0635  | 0.1077  | 0.157973 |
| Pkd2l2        | chr18:34409422-34442789   | 5.7715   | 7.2753   | 0.3341  | 0.454140 |
| Pomt1         | chr2:32236589-32255005    | 2.5470   | 2.1772   | -0.2263 | 0.239085 |
| Ola1          | chr2:73092800-73218924    | 27.3321  | 23.9600  | -0.1900 | 0.581525 |
| 4921531C22Rik | chr2:179975992-179979013  | 2.6306   | 3.5784   | 0.4439  | 0.291633 |
| Lsm14b        | chr2:180024986-180035465  | 18.3988  | 16.7984  | -0.1313 | 0.231999 |
| Fam83h        | chr15:76001092-76014336   | 0.1866   | 0.3600   | 0.9480  | 0.197080 |
| Gm13071       | chr4:149500632-149501008  | 3.5094   | 1.4803   | -1.2453 | 0.298352 |
| Svip          | chr7:51997164-52006018    | 0.3537   | 0.1533   | -1.2060 | 0.459879 |
| Plod3         | chr5:136987018-136996648  | 2.9894   | 3.6936   | 0.3052  | 0.458829 |
| Pdzd4         | chrX:73793358-73824969    | 0.5299   | 0.8735   | 0.7210  | 0.282092 |
| Mrpl2         | chr17:46646228-46650139   | 24.0785  | 28.2566  | 0.2308  | 0.362727 |
| Adat3         | chr10:80602879-80615783   | 9.6199   | 8.5835   | -0.1645 | 0.395062 |
| Nudcd3        | chr11:6105690-6200415     | 13.7573  | 15.0469  | 0.1293  | 0.030979 |
| Gm20705       | chr6:99384606-99388499    | 2.0053   | 1.2854   | -0.6416 | 0.546719 |
| Lcat          | chr8:105939550-105943382  | 1.4286   | 0.7976   | -0.8409 | 0.311382 |
| Gm16573       | chr14:56607260-56620513   | 9.2963   | 11.5840  | 0.3174  | 0.406873 |
| Prc           | chr3:87858899-87885608    | 23.5282  | 21.0983  | -0.1573 | 0.429629 |
| Gm10638       | chr8:86745698-86746603    | 2.1930   | 1.1291   | -0.9577 | 0.446170 |
| Zfp72         | chr13:74371425-74376566   | 2.8138   | 1.8922   | -0.5724 | 0.423499 |
| Gm13405       | chr2:31209469-31211347    | 1.7161   | 0.8035   | -1.0948 | 0.309219 |
| Gtpbp10       | chr5:5537453-5559538      | 1.5064   | 1.9626   | 0.3817  | 0.342742 |
| Snora68       | chr8:70895758-70895889    | 22.4522  | 32.0021  | 0.5113  | 0.308764 |
| Ano6          | chr15:95790842-95975464   | 17.1743  | 15.8864  | -0.1125 | 0.342221 |
| Guk1          | chr11:59183874-59192212   | 17.9904  | 15.7744  | -0.1896 | 0.439096 |
| Gm11725       | chr11:117871249-117887416 | 2.2809   | 1.5992   | -0.5123 | 0.271286 |
| Usp1          | chr5:149184349-149215434  | 14.0612  | 12.9813  | -0.1153 | 0.338439 |
| Cd8b1         | chr6:71322835-71337477    | 7.2024   | 5.6278   | -0.3559 | 0.362910 |
| Gm15929       | chr7:3666251-3670278      | 4.1153   | 2.9122   | -0.4989 | 0.393046 |
| Bcl3          | chr7:19808461-19822770    | 16.3817  | 14.4837  | -0.1777 | 0.434242 |
| 4930405O22Rik | chr17:63305445-63312973   | 3.1883   | 2.1682   | -0.5563 | 0.248388 |
| Ehhadh        | chr16:21761286-21787844   | 5.3319   | 4.3818   | -0.2831 | 0.459236 |
| Ints7         | chr1:191575762-191622672  | 22.8930  | 25.2465  | 0.1412  | 0.249557 |
| Riok3         | chr18:12128849-12157367   | 43.5775  | 47.8970  | 0.1364  | 0.310601 |
| Lama5         | chr2:180176372-180225859  | 0.3415   | 0.2327   | -0.5532 | 0.380090 |
| Gm10604       | chr4:11979559-11981265    | 0.7266   | 1.3132   | 0.8538  | 0.225620 |
| Dlg2          | chr7:91090705-92447003    | 0.0743   | 0.1540   | 1.0512  | 0.275641 |
| Deptor        | chr15:55112316-55259271   | 0.0458   | 0.1156   | 1.3357  | 0.290154 |
| Snord55       | chr4:117155769-117155848  | 13.7107  | 25.7998  | 0.9121  | 0.280569 |
| Ankrd61       | chr5:143890740-143897685  | 3.7869   | 3.0430   | -0.3155 | 0.268649 |
| Emc4          | chr2:112363010-112368027  | 12.4484  | 15.0790  | 0.2766  | 0.281817 |
| Aqr           | chr2:114101169-114187024  | 17.0845  | 16.0657  | -0.0887 | 0.245958 |
| Mgll          | chr6:88724411-88828360    | 0.0659   | 0.1966   | 1.5768  | 0.311611 |
| 2210016F16Rik | chr13:58380045-58385225   | 23.9650  | 26.5978  | 0.1504  | 0.204882 |
| Shmt1         | chr11:60788103-60811718   | 15.8190  | 13.9897  | -0.1773 | 0.554680 |
| Fam83g        | chr11:61684090-61709951   | 1.5584   | 2.0614   | 0.4036  | 0.493484 |
| Slc35b4       | chr6:34153379-34177111    | 5.0536   | 4.5515   | -0.1510 | 0.347659 |
| Zbtb2         | chr10:4367073-4388108     | 12.6519  | 14.1892  | 0.1654  | 0.091903 |
| Mir1190       | chr12:101021672-101021793 | 14.6488  | 8.2211   | -0.8334 | 0.164945 |
| Polr2c        | chr8:94857449-94864242    | 10.8141  | 9.1334   | -0.2437 | 0.345674 |
| Ogn           | chr13:49608070-49624500   | 0.5512   | 0.2589   | -1.0902 | 0.311389 |

|               |                           |           |           |         |          |
|---------------|---------------------------|-----------|-----------|---------|----------|
| St7           | chr6:17692932-17943025    | 1.2626    | 1.5634    | 0.3083  | 0.390947 |
| Dgki          | chr6:36846021-37300184    | 0.5142    | 0.8099    | 0.6555  | 0.494470 |
| Tnp2          | chr16:10787935-10788655   | 1.0489    | 2.2547    | 1.1040  | 0.290606 |
| Fbxl4         | chr4:22357542-22434091    | 7.1652    | 5.9679    | -0.2638 | 0.509583 |
| Apoe          | chr7:19696108-19699166    | 2.9037    | 2.1442    | -0.4375 | 0.399461 |
| mt-Rnr2       | chrM:1093-2675            | 6070.7892 | 5006.0163 | -0.2782 | 0.467109 |
| Rnf144a       | chr12:26306796-26415256   | 6.4944    | 5.6931    | -0.1900 | 0.446922 |
| Tmcc3         | chr10:94311948-94590956   | 0.7028    | 0.5115    | -0.4585 | 0.405274 |
| Zswim6        | chr13:107724617-107890064 | 10.2219   | 11.8799   | 0.2169  | 0.482391 |
| 1600020E01Rik | chr6:86526270-86564442    | 13.2168   | 11.4076   | -0.2124 | 0.457851 |
| Jagn1         | chr6:113442568-113448229  | 14.2987   | 16.9403   | 0.2446  | 0.251839 |
| Zfp949        | chr9:88548019-88571086    | 9.6044    | 8.4619    | -0.1827 | 0.473010 |
| Cyb5a         | chr18:84851337-84880401   | 55.5356   | 63.1158   | 0.1846  | 0.488428 |
| Casc4         | chr2:121866969-121936220  | 2.4082    | 2.9134    | 0.2747  | 0.312596 |
| Gon4l         | chr3:88835230-88910103    | 13.6229   | 12.5231   | -0.1214 | 0.431844 |
| Slc44a1       | chr4:53440412-53622478    | 5.2223    | 4.7132    | -0.1480 | 0.081038 |
| Scp2          | chr4:108043838-108144998  | 10.0193   | 11.5367   | 0.2035  | 0.336526 |
| Gm12655       | chr4:94460930-94477180    | 3.5077    | 2.0390    | -0.7827 | 0.419352 |
| Klh20         | chr1:161088374-161131511  | 6.5117    | 7.3182    | 0.1685  | 0.302630 |
| Gm12971       | chr4:130758562-130762379  | 1.7222    | 3.3003    | 0.9384  | 0.306375 |
| Acly          | chr11:100476352-100528000 | 85.0694   | 79.6136   | -0.0956 | 0.516781 |
| Ptgd2         | chr19:10937159-10942511   | 0.3891    | 0.7191    | 0.8859  | 0.212530 |
| Slc39a13      | chr2:91061790-91070417    | 5.0873    | 5.9199    | 0.2187  | 0.274880 |
| C530005A16Rik | chr4:116589732-116597630  | 8.5586    | 10.2720   | 0.2633  | 0.443404 |
| Cyth4         | chr15:78597046-78622019   | 105.0043  | 115.0133  | 0.1314  | 0.388161 |
| Ppp4r2        | chr6:100833637-100868717  | 13.9990   | 12.5423   | -0.1585 | 0.444204 |
| Gpn2          | chr4:133584361-133591735  | 9.7102    | 11.4970   | 0.2437  | 0.123607 |
| Rap1gap       | chr4:137664725-137729861  | 0.2220    | 0.3520    | 0.6653  | 0.273518 |
| Ggt5          | chr10:75589380-75616968   | 0.6552    | 0.4392    | -0.5771 | 0.229347 |
| Gm10874       | chr5:138363718-138388287  | 0.8043    | 1.3656    | 0.7638  | 0.322269 |
| Gm15497       | chr5:138610738-138611289  | 5.2235    | 3.3295    | -0.6497 | 0.417026 |
| Hspbp1        | chr7:4660520-4684963      | 21.5259   | 18.9105   | -0.1869 | 0.441713 |
| Sepw1         | chr7:15917207-15922402    | 63.0300   | 74.5739   | 0.2426  | 0.506186 |
| Aga           | chr8:53511701-53523421    | 15.3368   | 18.0557   | 0.2355  | 0.257187 |
| Gm22620       | chr9:15315188-15315321    | 16.0442   | 10.3552   | -0.6317 | 0.082177 |
| Tbcel         | chr9:42412315-42507809    | 12.6469   | 11.3271   | -0.1590 | 0.540454 |
| Ppm1m         | chr9:106194171-106199746  | 21.8787   | 24.2998   | 0.1514  | 0.272118 |
| Ttc38         | chr15:85832305-85858822   | 11.6563   | 13.0163   | 0.1592  | 0.069924 |
| Tbcc          | chr17:46890620-46892463   | 11.4489   | 13.5741   | 0.2457  | 0.397326 |
| Slc25a2       | chr18:37637377-37638723   | 3.1162    | 2.0533    | -0.6018 | 0.466721 |
| Atp5c1        | chr2:10056015-10080510    | 105.6602  | 120.1999  | 0.1860  | 0.510108 |
| Emc7          | chr2:112454996-112472162  | 9.0072    | 10.2123   | 0.1811  | 0.398349 |
| Prune         | chr3:95253673-95282076    | 5.5002    | 4.6418    | -0.2448 | 0.459924 |
| Nans          | chr4:46489247-46503632    | 19.7836   | 21.5966   | 0.1265  | 0.011497 |
| Zfp759        | chr13:67128227-67141787   | 4.7799    | 5.8468    | 0.2907  | 0.405802 |
| Ost4          | chr5:30905884-30907788    | 35.8796   | 41.2298   | 0.2005  | 0.424152 |
| Usp4Gos2      | chr5:74032268-74039996    | 1.0278    | 1.7551    | 0.7720  | 0.211460 |
| Gm20605       | chr5:137629174-137642899  | 38.9645   | 35.9317   | -0.1169 | 0.522982 |
| Rps17         | chr7:81342731-81345254    | 5.1542    | 6.7729    | 0.3940  | 0.327899 |
| Apobec2       | chr17:48419230-48432728   | 6.1572    | 4.6496    | -0.4052 | 0.457563 |
| Traf5         | chr1:191997429-192092559  | 23.3089   | 21.0771   | -0.1452 | 0.325146 |
| Gm10762       | chr2:128966592-128967725  | 5.6866    | 7.5462    | 0.4082  | 0.477703 |
| Rabac1        | chr7:24969749-24972728    | 70.6684   | 79.9982   | 0.1789  | 0.419466 |
| Pigc          | chr1:161969185-162027106  | 9.3380    | 8.2593    | -0.1771 | 0.440549 |
| NA            | chr18:36671159-36679366   | 16.9120   | 14.9737   | -0.1756 | 0.415478 |
| Zfp120        | chr2:150114405-150136708  | 17.4706   | 19.5564   | 0.1627  | 0.407821 |
| Zfp704        | chr3:9427010-9610085      | 0.5147    | 0.7141    | 0.4723  | 0.550711 |
| Rragd         | chr4:32983036-33022180    | 6.2070    | 5.4898    | -0.1772 | 0.403410 |
| Cmpk1         | chr4:114959335-114987241  | 16.2041   | 18.2728   | 0.1733  | 0.331637 |
| Snora61       | chr4:132310239-132310369  | 39.1323   | 53.3161   | 0.4462  | 0.506511 |
| Ccdc80        | chr16:45093401-45127924   | 0.4863    | 1.3048    | 1.4238  | 0.188663 |
| Mfsd9         | chr1:40772037-40790687    | 0.4824    | 0.8232    | 0.7709  | 0.381717 |
| Gm13910       | chr2:108948779-108950727  | 0.6064    | 1.2028    | 0.9880  | 0.292681 |
| Phactr4       | chr4:132355922-132422489  | 0.8892    | 1.3816    | 0.6357  | 0.390820 |
| Mrps7         | chr11:115603924-115608036 | 17.9961   | 20.6673   | 0.1997  | 0.347008 |
| Znhit1        | chr5:136982163-136988021  | 8.5441    | 10.3769   | 0.2804  | 0.414079 |
| Ggct          | chr6:54982579-54992950    | 5.6744    | 4.8207    | -0.2352 | 0.498465 |
| St6galnac6    | chr2:32599708-32620806    | 1.6215    | 2.0793    | 0.3588  | 0.298074 |
| Hspa5         | chr2:34771969-34776531    | 183.4511  | 198.8790  | 0.1165  | 0.334933 |
| Pigv          | chr4:133660386-133672647  | 5.8926    | 5.0865    | -0.2122 | 0.397684 |
| Cage1         | chr13:38006051-38037069   | 0.6679    | 0.9631    | 0.5282  | 0.332395 |

|               |                           |          |          |         |          |
|---------------|---------------------------|----------|----------|---------|----------|
| Slc2a9        | chr5:38349272-38503143    | 3.3187   | 3.9416   | 0.2482  | 0.324788 |
| Wnt2b         | chr3:104944804-104961709  | 0.7849   | 0.4985   | -0.6550 | 0.354400 |
| Pinx1         | chr14:63860311-63919859   | 12.0165  | 10.0834  | -0.2530 | 0.391490 |
| Surf1         | chr2:26913382-26916530    | 32.6558  | 29.5895  | -0.1423 | 0.358824 |
| Fam206a       | chr4:56802344-56809601    | 4.3160   | 3.7378   | -0.2075 | 0.396237 |
| Akirin1       | chr4:123734558-123750345  | 16.5558  | 18.7491  | 0.1795  | 0.361688 |
| Mmgt2         | chr11:62648663-62666354   | 4.9889   | 5.7077   | 0.1942  | 0.053784 |
| Dusp14        | chr11:84048040-84069261   | 2.7054   | 3.6742   | 0.4416  | 0.394337 |
| Ssh1          | chr5:113937093-113993894  | 6.8562   | 7.7779   | 0.1820  | 0.413973 |
| Tyrobp        | chr7:30413787-30417577    | 2.1764   | 3.9241   | 0.8504  | 0.240180 |
| Exoc8         | chr8:124890299-124897705  | 12.5359  | 11.7285  | -0.0960 | 0.022198 |
| Rexo2         | chr9:48468513-48480611    | 60.7222  | 55.3433  | -0.1338 | 0.401093 |
| Pdha1         | chrX:160122208-160138413  | 50.3861  | 55.9823  | 0.1519  | 0.443394 |
| Polr2k        | chr15:36174009-36177010   | 0.7441   | 1.5886   | 1.0942  | 0.178455 |
| Pdlim2        | chr14:70164217-70177681   | 18.6314  | 16.8786  | -0.1425 | 0.500447 |
| Zfp36l2       | chr17:84183930-84187947   | 44.8483  | 41.4413  | -0.1140 | 0.494771 |
| Slc39a6       | chr18:24579880-24603817   | 8.5944   | 9.8931   | 0.2030  | 0.356391 |
| Gpcpd1        | chr2:132529081-132587729  | 17.4699  | 19.3995  | 0.1511  | 0.398897 |
| Zswim3        | chr2:164805097-164822130  | 2.9108   | 3.7786   | 0.3764  | 0.380977 |
| NA            | chr9:7836686-7837064      | 3.2181   | 5.8735   | 0.8680  | 0.257363 |
| Filip1        | chr9:79815050-79977804    | 0.1980   | 0.3745   | 0.9192  | 0.270324 |
| 1700030A11Rik | chr17:28905264-28906771   | 1.3384   | 0.6329   | -1.0806 | 0.435273 |
| A230050P2ORik | chr9:20868641-20874307    | 18.9414  | 16.8567  | -0.1682 | 0.551103 |
| Gramd1c       | chr16:43980349-44027945   | 3.8364   | 4.5928   | 0.2596  | 0.202481 |
| Acp2          | chr2:91202884-91214098    | 13.6624  | 12.5549  | -0.1220 | 0.316619 |
| Rpl34         | chr3:130726830-130730398  | 133.0061 | 172.8548 | 0.3781  | 0.403848 |
| 1110028F11Rik | chr11:87701395-87705331   | 1.6169   | 0.6994   | -1.2090 | 0.504568 |
| Impa2         | chr18:67289252-67319146   | 15.5177  | 13.2407  | -0.2289 | 0.481816 |
| Dus1l         | chr11:120789200-120796403 | 20.5732  | 19.0524  | -0.1108 | 0.246026 |
| Sec11a        | chr7:80904888-80947780    | 18.0380  | 19.9862  | 0.1480  | 0.276825 |
| Mrpl15        | chr1:4773205-4785739      | 12.5526  | 11.4088  | -0.1378 | 0.476216 |
| Cep57l1       | chr10:41718839-41809607   | 12.1443  | 10.4993  | -0.2100 | 0.465840 |
| Ppp1r12a      | chr10:108162399-108277575 | 126.0736 | 136.3261 | 0.1128  | 0.254503 |
| Gm16229       | chr10:127663838-127665484 | 24.9223  | 22.1826  | -0.1680 | 0.290933 |
| Aebp1         | chr11:5861946-5872088     | 0.4358   | 0.2265   | -0.9442 | 0.263937 |
| Sco1          | chr11:67052669-67067070   | 5.8944   | 6.8842   | 0.2239  | 0.329688 |
| Cyb5d2        | chr11:72777231-72796142   | 1.9623   | 2.3767   | 0.2764  | 0.083668 |
| Scpep1        | chr11:88924019-88955465   | 4.9399   | 5.9553   | 0.2697  | 0.072937 |
| Vcpkmt        | chr12:69577627-69583028   | 17.4828  | 14.8885  | -0.2317 | 0.413390 |
| Cinp          | chr12:110872609-110889145 | 13.9650  | 12.2134  | -0.1934 | 0.433245 |
| Spin1         | chr13:51100879-51152546   | 16.2429  | 18.0698  | 0.1538  | 0.319896 |
| Syk           | chr13:52583172-52648792   | 0.5057   | 0.3471   | -0.5429 | 0.428751 |
| Rab24         | chr13:55319222-55321980   | 31.6099  | 28.8781  | -0.1304 | 0.367961 |
| Fcho2         | chr13:98723406-98815449   | 9.2513   | 8.0738   | -0.1964 | 0.574045 |
| Hadhb         | chr5:30155247-30184593    | 4.6098   | 5.2097   | 0.1765  | 0.048369 |
| Ccni          | chr5:93181932-93206495    | 31.1133  | 34.2693  | 0.1394  | 0.278670 |
| Rita1         | chr5:120594304-120612589  | 1.0229   | 1.4642   | 0.5174  | 0.443361 |
| Atp5j2        | chr5:145183697-145192062  | 28.4384  | 33.4249  | 0.2331  | 0.479920 |
| Gimap5        | chr6:48746196-48754210    | 47.9914  | 52.2277  | 0.1220  | 0.088222 |
| Tappbl        | chr6:125223932-125231860  | 36.0364  | 39.7315  | 0.1408  | 0.233734 |
| Rhno1         | chr6:128356999-128362911  | 17.0832  | 15.4046  | -0.1492 | 0.352488 |
| Pkp3          | chr7:141078217-141090510  | 32.2860  | 37.0624  | 0.1990  | 0.589482 |
| Pde4c         | chr8:70723719-70751186    | 0.6040   | 0.4128   | -0.5491 | 0.374854 |
| Hmgxb4        | chr8:74993355-75031978    | 9.9662   | 11.0894  | 0.1541  | 0.151861 |
| Taf1c         | chr8:119597974-119605222  | 13.5241  | 12.0061  | -0.1718 | 0.514807 |
| Psm4          | chr9:54950789-54958030    | 38.1599  | 43.2188  | 0.1796  | 0.491001 |
| Tmed3         | chr9:89699202-89705043    | 20.2524  | 23.7084  | 0.2273  | 0.367263 |
| Alas1         | chr9:106233454-106248126  | 8.8281   | 7.8982   | -0.1606 | 0.379200 |
| Gmppb         | chr9:108049268-108052801  | 16.7106  | 19.0863  | 0.1918  | 0.418371 |
| Deb1          | chr9:121710388-121712921  | 10.6462  | 14.6154  | 0.4572  | 0.418864 |
| Tmem42        | chr9:123021325-123023490  | 11.9547  | 14.7633  | 0.3044  | 0.419704 |
| Xlr4a         | chrX:73074344-73082478    | 15.8078  | 18.5010  | 0.2270  | 0.400098 |
| Jpx           | chrX:103493557-103506425  | 0.7845   | 1.1350   | 0.5328  | 0.441398 |
| A830080D01Rik | chrX:159526687-159593081  | 15.1231  | 13.7233  | -0.1401 | 0.429334 |
| Drosha        | chr15:12824814-12935290   | 8.1347   | 7.3563   | -0.1451 | 0.319391 |
| 1700088E04Rik | chr15:79134654-79141251   | 10.6355  | 8.6025   | -0.3061 | 0.367416 |
| Tube1         | chr15:89098356-89123087   | 16.1111  | 14.8434  | -0.1182 | 0.498396 |
| Rps24         | chr14:24490680-24496146   | 424.9259 | 524.1590 | 0.3028  | 0.409454 |
| Tm9sf2        | chr14:122107037-122159604 | 61.7134  | 67.9463  | 0.1388  | 0.372866 |
| 1600012H06Rik | chr17:14943183-14959570   | 19.2467  | 17.5556  | -0.1327 | 0.383354 |
| Zfp213        | chr17:23556768-23564226   | 9.8958   | 8.6406   | -0.1957 | 0.409520 |



|           |                           |          |          |         |          |
|-----------|---------------------------|----------|----------|---------|----------|
| Agpat1    | chr17:34604261-34613449   | 18.4635  | 16.7235  | -0.1428 | 0.429508 |
| Plin4     | chr17:56100590-56109802   | 0.2034   | 0.3202   | 0.6548  | 0.042314 |
| Memo1     | chr17:74200705-74294883   | 24.2427  | 21.4810  | -0.1745 | 0.471226 |
| Eml4      | chr17:83350930-83480361   | 39.2171  | 43.3905  | 0.1459  | 0.456141 |
| Setd4     | chr16:93583456-93604063   | 4.0312   | 3.4732   | -0.2150 | 0.343562 |
| Pcx       | chr19:4510471-4621752     | 1.2617   | 0.9574   | -0.3982 | 0.293802 |
| Flrt1     | chr19:7092013-7105729     | 0.2351   | 0.1114   | -1.0772 | 0.450933 |
| Bard1     | chr1:71027497-71103146    | 3.5556   | 4.1555   | 0.2249  | 0.269739 |
| Gm17415   | chr1:93421681-93422488    | 1.7166   | 0.8386   | -1.0334 | 0.335630 |
| Glrx2     | chr1:143739028-143749676  | 4.5156   | 5.3018   | 0.2316  | 0.356065 |
| Rnf2      | chr1:151469405-151500823  | 30.4603  | 33.7443  | 0.1477  | 0.308083 |
| Gm22357   | chr1:161036056-161036139  | 477.6018 | 419.4701 | -0.1872 | 0.513256 |
| Cndp2     | chr18:84667469-84685633   | 30.4799  | 27.4725  | -0.1499 | 0.486439 |
| Sdccag3   | chr2:26382801-26389316    | 39.3757  | 36.5677  | -0.1067 | 0.472031 |
| Gins1     | chr2:150905399-150931280  | 6.9651   | 8.5043   | 0.2881  | 0.238359 |
| Trim46    | chr3:89234176-89246309    | 1.2049   | 1.5902   | 0.4003  | 0.229312 |
| Shc1      | chr3:89418442-89430015    | 9.5802   | 10.7428  | 0.1652  | 0.289318 |
| Pi4kb     | chr3:94974730-95006843    | 30.8913  | 28.5126  | -0.1156 | 0.499003 |
| Gm12500   | chr3:108085975-108088009  | 1.2697   | 0.8188   | -0.6329 | 0.306705 |
| Anp32b    | chr4:46450901-46472657    | 10.7213  | 9.0299   | -0.2477 | 0.492153 |
| Meaf6     | chr4:125085133-125113238  | 7.9827   | 7.1425   | -0.1604 | 0.420024 |
| Laptm5    | chr4:130913124-130936141  | 166.4964 | 154.7454 | -0.1056 | 0.582220 |
| Gm17083   | chr13:34006965-34008331   | 2.1746   | 3.5475   | 0.7061  | 0.253324 |
| Gm10311   | chr8:69373527-69373914    | 3.9043   | 1.9826   | -0.9777 | 0.395838 |
| Apol7c    | chr15:77524866-77533315   | 0.5631   | 1.8110   | 1.6852  | 0.232102 |
| Zfp947    | chr17:22144358-22166190   | 0.5428   | 1.7305   | 1.6726  | 0.114578 |
| Prrt1     | chr17:34629532-34633126   | 0.6138   | 1.1109   | 0.8558  | 0.313044 |
| Gm24371   | chr4:32514786-32515053    | 9.8785   | 5.0541   | -0.9668 | 0.511342 |
| Srd5a1    | chr13:69573448-69611442   | 0.2271   | 0.5052   | 1.1538  | 0.231210 |
| Nek11     | chr9:105162466-105395524  | 0.1002   | 0.2573   | 1.3606  | 0.266994 |
| Lmo7      | chr14:101729956-101934710 | 0.0270   | 0.0744   | 1.4642  | 0.338742 |
| Gm1647    | chr3:69131232-69157177    | 2.3403   | 1.1557   | -1.0180 | 0.544482 |
| Gm22392   | chr15:44432594-44432701   | 2.3562   | 7.4108   | 1.6532  | 0.343315 |
| Rbbp8     | chr18:11633275-11743207   | 12.6416  | 14.2460  | 0.1724  | 0.356587 |
| Shhg9     | chr17:24719530-24719965   | 2.2493   | 5.1739   | 1.2018  | 0.207549 |
| Cc2d2a    | chr5:43662378-43740972    | 1.2097   | 1.5928   | 0.3968  | 0.559576 |
| Adat2     | chr10:13552893-13563376   | 5.0013   | 3.8271   | -0.3861 | 0.318151 |
| Hspa2     | chr12:76404175-76406934   | 2.6317   | 2.0016   | -0.3949 | 0.399891 |
| Plbd2     | chr5:120483281-120503625  | 4.1219   | 3.5194   | -0.2280 | 0.527630 |
| Nrf1      | chr6:30047987-30153458    | 11.1816  | 10.3625  | -0.1098 | 0.426449 |
| Mphosph8  | chr14:56668247-56697430   | 18.2544  | 16.4904  | -0.1466 | 0.496568 |
| Cables2   | chr2:180258539-180273496  | 11.7626  | 10.7516  | -0.1297 | 0.302694 |
| Ptpn3     | chr4:57190840-57301837    | 2.0970   | 1.7676   | -0.2465 | 0.344032 |
| Sh3d19    | chr3:85971108-86130526    | 0.8947   | 1.1228   | 0.3276  | 0.279458 |
| Nsa2      | chr13:97129426-97137926   | 13.2222  | 16.1908  | 0.2922  | 0.549272 |
| Psmg4     | chr13:34162963-34178172   | 22.3672  | 28.6193  | 0.3556  | 0.478092 |
| Xpr1      | chr1:155275700-155417415  | 6.6102   | 7.2955   | 0.1423  | 0.267049 |
| Fam71e1   | chr7:44496587-44501134    | 1.8622   | 0.9505   | -0.9702 | 0.402096 |
| Gm9159    | chrX:103597770-103598336  | 2.0035   | 0.9380   | -1.0948 | 0.424239 |
| Ccdc71l   | chr12:32378788-32382943   | 10.1558  | 11.3963  | 0.1663  | 0.201605 |
| Gm9144    | chr12:7859826-7861205     | 0.3544   | 0.8357   | 1.2376  | 0.235052 |
| Gm13528   | chr2:33177901-33181881    | 2.2065   | 0.8567   | -1.3649 | 0.271118 |
| Cradd     | chr10:95174745-95324097   | 2.6565   | 3.8098   | 0.5202  | 0.352067 |
| Tbc1d9b   | chr11:50131395-50172785   | 15.3621  | 16.9134  | 0.1388  | 0.270467 |
| Irgm2     | chr11:58199617-58222779   | 36.4510  | 39.8855  | 0.1299  | 0.270030 |
| Ctns      | chr11:73183595-73199042   | 4.4988   | 3.8847   | -0.2117 | 0.086758 |
| Vat1      | chr11:101458744-101466230 | 4.5109   | 5.3860   | 0.2558  | 0.202655 |
| Arsg      | chr11:109473373-109573330 | 2.6138   | 2.0635   | -0.3410 | 0.442226 |
| Cyth1     | chr11:118132018-118248592 | 83.4937  | 79.2277  | -0.0757 | 0.311712 |
| Cbx4      | chr11:119077572-119086221 | 15.5117  | 14.2792  | -0.1194 | 0.430017 |
| Unc5a     | chr13:54949410-55006018   | 0.2862   | 0.4961   | 0.7936  | 0.361898 |
| Krtcap3   | chr5:31251690-31253202    | 9.0679   | 11.5535  | 0.3495  | 0.515514 |
| Nup98     | chr7:102134203-102210120  | 35.3350  | 33.1850  | -0.0906 | 0.274365 |
| Spon1     | chr7:113765997-114043370  | 0.8099   | 0.6072   | -0.4157 | 0.430302 |
| Leprotil1 | chr8:34135571-34147033    | 66.9933  | 73.2899  | 0.1296  | 0.364654 |
| Pus7l     | chr15:94522687-94543547   | 8.0141   | 6.7056   | -0.2572 | 0.560723 |
| Traj1     | chr14:54218813-54218840   | 15.8596  | 36.9461  | 1.2201  | 0.314550 |
| Trim26    | chr17:36837133-36859398   | 14.3424  | 13.4016  | -0.0979 | 0.214450 |
| Med20     | chr17:47611581-47624418   | 12.3440  | 11.4909  | -0.1033 | 0.236333 |
| Tmem194b  | chr1:52630704-52651919    | 18.0826  | 20.6629  | 0.1924  | 0.471480 |
| Sqrdl     | chr2:122765236-122809569  | 1.8955   | 2.3588   | 0.3155  | 0.237581 |

|          |                           |          |          |         |          |
|----------|---------------------------|----------|----------|---------|----------|
| Arfp1    | chr3:84496092-85887516    | 16.9393  | 18.9055  | 0.1584  | 0.293000 |
| Jak1     | chr4:101152366-101265282  | 117.2304 | 111.8817 | -0.0674 | 0.299965 |
| Gm16167  | chr8:85853372-85854437    | 0.9204   | 0.4081   | -1.1734 | 0.298743 |
| Gm12335  | chr11:75066435-75066762   | 3.9452   | 1.4702   | -1.4241 | 0.479951 |
| Tmsb10   | chr6:72957346-72958748    | 36.1133  | 31.2320  | -0.2095 | 0.567658 |
| Gm26982  | chr6:113714970-113716121  | 12.7418  | 10.5316  | -0.2748 | 0.361292 |
| Gm7901   | chr8:75711461-75713288    | 0.4995   | 0.1946   | -1.3599 | 0.421618 |
| Fem1b    | chr9:62791831-62811648    | 22.5111  | 20.9190  | -0.1058 | 0.454100 |
| Gm17218  | chr17:26620357-26625100   | 3.4971   | 1.7415   | -1.0058 | 0.314541 |
| Rps18    | chr17:33951998-33956001   | 28.2652  | 33.0940  | 0.2275  | 0.562584 |
| Usp40    | chr1:87945120-88008551    | 9.2396   | 10.4274  | 0.1745  | 0.310912 |
| Trav19   | chr14:53845233-53845826   | 3.9183   | 6.8091   | 0.7972  | 0.334601 |
| Ppa1     | chr10:61648551-61674168   | 29.9042  | 27.2129  | -0.1361 | 0.520403 |
| Ccdc53   | chr10:88201092-88246158   | 10.3948  | 9.4009   | -0.1450 | 0.365229 |
| Pdlim4   | chr11:54054927-54069014   | 0.7776   | 0.4415   | -0.8167 | 0.467080 |
| Klf6     | chr13:5861488-5870393     | 50.5966  | 54.8361  | 0.1161  | 0.214721 |
| Mpp6     | chr6:50110240-50198598    | 16.1518  | 14.4217  | -0.1635 | 0.487360 |
| Nosip    | chr7:45062428-45078503    | 14.6542  | 16.4771  | 0.1691  | 0.271995 |
| Scaper   | chr9:55549882-55919605    | 17.3402  | 15.8765  | -0.1272 | 0.458497 |
| Vbp1     | chrX:75514298-75534942    | 32.0670  | 36.2304  | 0.1761  | 0.440645 |
| Etf1     | chr18:34902784-34932007   | 81.1523  | 75.7634  | -0.0991 | 0.521193 |
| Slc23a1  | chr18:35614603-35627244   | 1.0408   | 1.4924   | 0.5200  | 0.449183 |
| Lrig2    | chr3:104453983-104511856  | 7.3547   | 8.2049   | 0.1578  | 0.222968 |
| Gm16433  | chr6:108563444-108565693  | 1.0774   | 0.6282   | -0.7783 | 0.463910 |
| Jund     | chr8:70697738-70700616    | 86.4704  | 98.6179  | 0.1896  | 0.600434 |
| Mrps16   | chr14:20391230-20393555   | 46.4806  | 54.2420  | 0.2228  | 0.344754 |
| Nubp1    | chr16:10411947-10424428   | 21.0581  | 19.2078  | -0.1327 | 0.487840 |
| Gm9892   | chr8:52195779-52197160    | 0.9927   | 1.6040   | 0.6922  | 0.385134 |
| Smyd3    | chr1:178951959-179518041  | 3.4932   | 3.0997   | -0.1724 | 0.346284 |
| Tube1    | chr10:39134022-39151058   | 2.0140   | 2.5832   | 0.3591  | 0.239263 |
| Bcr      | chr10:75060895-75184923   | 6.9914   | 6.1695   | -0.1804 | 0.523435 |
| Lppr3    | chr10:79860474-79874634   | 6.9845   | 7.9868   | 0.1935  | 0.327927 |
| Matk     | chr10:81252934-81263365   | 22.0948  | 25.4855  | 0.2060  | 0.563113 |
| Avil     | chr10:127000708-127020994 | 0.8489   | 0.5580   | -0.6054 | 0.400986 |
| Gm26542  | chr11:50237008-50288839   | 3.7759   | 2.6053   | -0.5354 | 0.474439 |
| Mnt      | chr11:74830919-74845725   | 3.8531   | 3.2343   | -0.2526 | 0.434160 |
| Nek8     | chr11:78166105-78176675   | 2.7344   | 3.3331   | 0.2856  | 0.474371 |
| Atp6v0a1 | chr11:101009451-101063719 | 2.1098   | 1.7355   | -0.2817 | 0.430885 |
| Cntnap1  | chr11:101170522-101190724 | 0.3916   | 0.2630   | -0.5744 | 0.186075 |
| Atp5h    | chr11:115415688-115419962 | 42.8588  | 47.9738  | 0.1627  | 0.334511 |
| Akr1c13  | chr13:4191183-4205596     | 7.7983   | 9.3888   | 0.2678  | 0.235070 |
| Ankra2   | chr13:98263157-98274750   | 10.1472  | 11.7773  | 0.2149  | 0.385693 |
| Pex1     | chr5:3596065-3637232      | 3.6276   | 3.1771   | -0.1913 | 0.443407 |
| Klh7     | chr5:24100589-24161223    | 3.1418   | 3.8899   | 0.3081  | 0.356043 |
| Kcnh2    | chr5:24319588-24351604    | 1.8328   | 1.5022   | -0.2869 | 0.257127 |
| Nup54    | chr5:92415539-92435219    | 16.4579  | 14.8643  | -0.1469 | 0.432288 |
| P2rx4    | chr5:122707583-122729738  | 7.1683   | 8.3631   | 0.2224  | 0.339101 |
| AI480526 | chr5:123133722-123141666  | 9.6980   | 8.4828   | -0.1931 | 0.590608 |
| Diablo   | chr5:123509764-123524176  | 12.6267  | 13.9751  | 0.1464  | 0.288292 |
| Snx8     | chr5:140340303-140389251  | 0.7445   | 1.2417   | 0.7380  | 0.224608 |
| Amz1     | chr5:140724126-140761439  | 0.9397   | 1.2699   | 0.4344  | 0.409401 |
| Ccdc132  | chr6:3498392-3603531      | 8.7005   | 7.8545   | -0.1476 | 0.404414 |
| Kcmf1    | chr6:72841113-72899979    | 19.4635  | 21.5096  | 0.1442  | 0.160089 |
| Usp5     | chr6:124815018-124829484  | 32.4422  | 30.3200  | -0.0976 | 0.437883 |
| Klrb1c   | chr6:128778484-128789215  | 3.0315   | 3.8622   | 0.3494  | 0.383357 |
| Magohb   | chr6:131284387-131293244  | 4.3883   | 5.5199   | 0.3310  | 0.344442 |
| Mansc4   | chr6:147075059-147087032  | 0.8323   | 0.4127   | -1.0119 | 0.113326 |
| Fam60a   | chr6:148921034-148946467  | 1.7722   | 1.3326   | -0.4113 | 0.507690 |
| Zfp619   | chr7:39517765-39540420    | 3.0130   | 2.5608   | -0.2346 | 0.383417 |
| Zfp141   | chr7:42473385-42505726    | 11.2658  | 12.6941  | 0.1722  | 0.394262 |
| Cyth2    | chr7:45806636-45814581    | 15.8818  | 17.5922  | 0.1476  | 0.159717 |
| Tmem126b | chr7:90468193-90476001    | 5.8154   | 6.6791   | 0.1998  | 0.144627 |
| Copb1    | chr7:114215558-114254680  | 56.9052  | 62.0049  | 0.1238  | 0.308093 |
| Itgal    | chr7:127296259-127335137  | 60.9357  | 56.2288  | -0.1160 | 0.623959 |
| Gm22204  | chr8:3615528-3615855      | 5.2595   | 8.0106   | 0.6070  | 0.399259 |
| Mrps31   | chr8:22411339-22429665    | 12.8294  | 15.5050  | 0.2733  | 0.426100 |
| Nr2c2ap  | chr8:70131332-70133739    | 19.5314  | 16.6092  | -0.2338 | 0.516432 |
| Zswim4   | chr8:84210941-84237042    | 7.8426   | 9.0847   | 0.2121  | 0.466439 |
| Cpne2    | chr8:94532989-94570529    | 0.8425   | 0.5469   | -0.6233 | 0.356760 |
| Cmtm3    | chr8:104340593-104347672  | 5.6057   | 6.9921   | 0.3188  | 0.386197 |
| Ccsap    | chr8:123840830-123860209  | 6.5330   | 5.5268   | -0.2413 | 0.454559 |

|               |                           |          |          |         |          |
|---------------|---------------------------|----------|----------|---------|----------|
| Aplp2         | chr9:31149556-31211815    | 28.1971  | 31.1078  | 0.1417  | 0.364412 |
| Ccdc15        | chr9:37275834-37348392    | 3.0290   | 3.7080   | 0.2918  | 0.322844 |
| Amica1        | chr9:45079182-45108530    | 3.5592   | 2.8569   | -0.3171 | 0.359439 |
| 1110032A03Rik | chr9:50762827-50775520    | 2.8807   | 3.4857   | 0.2750  | 0.396139 |
| Syncrip       | chr9:88449728-88482574    | 38.1620  | 35.4694  | -0.1056 | 0.543401 |
| Pik3cb        | chr9:99038401-99140621    | 1.2959   | 1.7085   | 0.3988  | 0.322824 |
| Pcbp4         | chr9:106453837-106464007  | 7.1045   | 8.4758   | 0.2546  | 0.317935 |
| Rassf1        | chr9:107551554-107562263  | 12.8824  | 14.2699  | 0.1476  | 0.262237 |
| Rnf123        | chr9:108051533-108083346  | 22.8733  | 21.1672  | -0.1118 | 0.514075 |
| Arih2         | chr9:108602941-108649380  | 19.1139  | 21.1389  | 0.1453  | 0.291594 |
| Trex1         | chr9:109057932-109060338  | 38.6012  | 44.3436  | 0.2001  | 0.487994 |
| Kis2          | chrX:52742562-52744960    | 2.1144   | 1.5962   | -0.4056 | 0.203477 |
| Cx1a          | chrX:53642487-53643763    | 1.4396   | 0.8134   | -0.8237 | 0.350111 |
| A430057M04Rik | chr14:21847577-21856926   | 1.6062   | 1.2859   | -0.3209 | 0.314613 |
| Traj16        | chr14:54203133-54203194   | 70.7039  | 51.5761  | -0.4551 | 0.382743 |
| Atp8a2        | chr14:59647530-60197179   | 0.5227   | 0.7404   | 0.5022  | 0.445589 |
| Cd2ap         | chr17:42792950-42876424   | 17.6990  | 16.0685  | -0.1394 | 0.561279 |
| Lmln          | chr16:33062520-33127695   | 0.6211   | 0.8546   | 0.4603  | 0.424742 |
| Vps37c        | chr19:10688814-10714419   | 6.3364   | 5.3125   | -0.2543 | 0.391933 |
| Gm26457       | chr1:63178676-63178754    | 36.1955  | 22.7912  | -0.6673 | 0.405198 |
| Arcp2         | chr1:74236496-74268209    | 208.0650 | 224.3082 | 0.1084  | 0.248738 |
| Nckap5        | chr1:125913619-126830799  | 0.1687   | 0.2540   | 0.5906  | 0.340536 |
| Snord47       | chr1:161038081-161038158  | 91.2845  | 61.2879  | -0.5748 | 0.541638 |
| Gm25789       | chr1:161038307-161038383  | 49.1120  | 68.8300  | 0.4870  | 0.371981 |
| Ncstn         | chr1:172066012-172082795  | 15.6085  | 13.9473  | -0.1623 | 0.583648 |
| Map3k8        | chr18:4331326-4353015     | 13.3542  | 12.0987  | -0.1424 | 0.423614 |
| Mir1893       | chr18:6490563-6490646     | 45.4049  | 63.0064  | 0.4727  | 0.431166 |
| 2410004N09Rik | chr18:33794891-33795986   | 22.3618  | 27.3940  | 0.2928  | 0.239516 |
| Zmynd19       | chr2:24949791-24962075    | 7.4831   | 6.5472   | -0.1928 | 0.487729 |
| Anapc2        | chr2:25272477-25285915    | 14.8891  | 13.5406  | -0.1370 | 0.372275 |
| Slc2a6        | chr2:27021362-27027998    | 1.4117   | 1.8671   | 0.4034  | 0.296761 |
| Gm16534       | chr2:32050085-32064911    | 7.6412   | 6.5201   | -0.2289 | 0.140565 |
| Ccdc148       | chr2:58821696-59160683    | 0.3724   | 0.2232   | -0.7387 | 0.387366 |
| Gm13571       | chr2:60338187-60371234    | 5.7248   | 4.5555   | -0.3296 | 0.619610 |
| Timm10        | chr2:84826996-84830213    | 12.7619  | 16.2524  | 0.3488  | 0.444498 |
| Mapk8ip1      | chr2:92383675-92401263    | 1.3042   | 1.6932   | 0.3766  | 0.374645 |
| Serinc4       | chr2:121439058-121456781  | 13.0259  | 11.6411  | -0.1622 | 0.509106 |
| Shf           | chr2:122348891-122369162  | 3.0792   | 2.2989   | -0.4216 | 0.413057 |
| Slc28a2       | chr2:122426476-122461137  | 46.0082  | 43.1276  | -0.0933 | 0.462637 |
| Spef1         | chr2:131170260-131187282  | 2.3117   | 2.9488   | 0.3511  | 0.314208 |
| Tspyl3        | chr2:153222379-153225441  | 7.5764   | 6.5989   | -0.1993 | 0.355650 |
| Spata25       | chr2:164826388-164828537  | 0.4198   | 0.9140   | 1.1227  | 0.350185 |
| Dcl2          | chr3:86786149-86920884    | 4.1946   | 5.1248   | 0.2890  | 0.505560 |
| Lmna          | chr3:88481147-88509956    | 2.6367   | 3.3019   | 0.3246  | 0.473940 |
| Ppp3ca        | chr3:136670123-136937727  | 15.2574  | 14.0058  | -0.1235 | 0.430479 |
| Ubxn2b        | chr4:6191097-6221688      | 5.6738   | 6.3501   | 0.1625  | 0.052305 |
| Gm11831       | chr4:11501455-11502839    | 3.5951   | 2.3496   | -0.6136 | 0.293547 |
| Prpf4         | chr4:62408796-62426990    | 12.4598  | 11.5159  | -0.1137 | 0.317931 |
| Atp6v1g1      | chr4:63544771-63550750    | 13.8147  | 17.5426  | 0.3447  | 0.506463 |
| Cntln         | chr4:84884308-85131921    | 4.8083   | 5.6219   | 0.2255  | 0.463004 |
| Atg4c         | chr4:99193933-99259787    | 0.3010   | 0.1066   | -1.4972 | 0.484358 |
| Ccdc23        | chr4:119195305-119201298  | 11.7241  | 14.5603  | 0.3126  | 0.436339 |
| Sh3d21        | chr4:126150601-126163491  | 1.2854   | 1.7787   | 0.4686  | 0.401818 |
| Gm12942       | chr4:127123690-127129644  | 9.0898   | 7.8545   | -0.2107 | 0.244240 |
| Otud3         | chr4:138895378-138913945  | 6.2032   | 7.5404   | 0.2816  | 0.297219 |
| Miip          | chr4:147860777-147868816  | 19.3589  | 21.3807  | 0.1433  | 0.213650 |
| Lzic          | chr4:149485228-149496668  | 13.2988  | 11.4787  | -0.2123 | 0.485372 |
| AW011738      | chr4:156203303-156205151  | 20.6347  | 18.0428  | -0.1936 | 0.562651 |
| Rpsa-ps4      | chr11:33038815-33039703   | 0.5459   | 1.0402   | 0.9301  | 0.138311 |
| Gm12207       | chr11:52233723-52236619   | 3.5476   | 1.8771   | -0.9184 | 0.477479 |
| Efcab5        | chr11:77089914-77188968   | 0.1926   | 0.4028   | 1.0646  | 0.452470 |
| Map10         | chr8:125669817-125673365  | 0.5804   | 0.9244   | 0.6716  | 0.302679 |
| Lrrc6         | chr15:66379857-66500910   | 0.6679   | 0.3088   | -1.1127 | 0.291980 |
| Gm16151       | chr1:38307901-38311930    | 7.4340   | 4.7282   | -0.6528 | 0.614651 |
| Wdr34         | chr2:30031545-30048881    | 0.6671   | 1.1844   | 0.8282  | 0.336177 |
| 8030451A03Rik | chr4:63979853-64149924    | 0.2701   | 0.5633   | 1.0605  | 0.337536 |
| Rps19-ps3     | chr4:147821776-147822202  | 1.8184   | 3.7602   | 1.0482  | 0.324403 |
| Gm23111       | chr17:33959662-33959767   | 11.7674  | 4.8784   | -1.2703 | 0.504872 |
| Rnd2          | chr11:101464998-101471853 | 0.2502   | 0.5101   | 1.0274  | 0.106111 |
| Rev1          | chr1:38052786-38129662    | 11.2432  | 10.0690  | -0.1591 | 0.450993 |
| Wdr7          | chr18:63708694-63989760   | 10.4687  | 9.5313   | -0.1353 | 0.507705 |

|               |                           |          |          |         |          |
|---------------|---------------------------|----------|----------|---------|----------|
| C230052i12Rik | chr7:35392274-35396817    | 8.2738   | 9.9024   | 0.2592  | 0.318239 |
| Cited2        | chr10:17723227-17725673   | 5.1941   | 6.4491   | 0.3122  | 0.428645 |
| Dna2          | chr10:62947025-62974185   | 2.6435   | 3.1964   | 0.2740  | 0.420670 |
| P4hb          | chr11:120560297-120573253 | 106.6372 | 115.2428 | 0.1120  | 0.286764 |
| Exoc2         | chr13:30813918-30974047   | 37.7777  | 41.2105  | 0.1255  | 0.298658 |
| Atp6v0a2      | chr5:124629066-124722144  | 30.5581  | 28.4697  | -0.1021 | 0.318627 |
| Sprtn         | chr8:124897885-124903813  | 17.7892  | 15.9266  | -0.1596 | 0.411624 |
| 4930429F24Rik | chr9:79793640-79803235    | 1.3715   | 0.7864   | -0.8025 | 0.162362 |
| Magee1        | chrX:105120395-105123909  | 3.2438   | 3.9293   | 0.2766  | 0.358820 |
| Dlg1          | chr16:31663442-31873356   | 17.3839  | 15.9236  | -0.1266 | 0.575859 |
| Rnf149        | chr1:39551295-39577405    | 16.7612  | 18.9175  | 0.1746  | 0.358248 |
| Gm21972       | chr1:86133636-86162788    | 30.7984  | 25.7421  | -0.2587 | 0.536794 |
| Fem1c         | chr18:46501745-46525971   | 11.2541  | 10.3178  | -0.1253 | 0.434997 |
| Atp9b         | chr18:80734142-80934058   | 42.7286  | 40.4450  | -0.0792 | 0.334883 |
| Tbc1d20       | chr2:152293827-152313996  | 19.2048  | 21.1233  | 0.1374  | 0.244513 |
| Fam84a        | chr12:14147598-14152038   | 0.1138   | 0.2928   | 1.3628  | 0.295099 |
| Cpsf3         | chr12:21286296-21315056   | 62.4350  | 58.5138  | -0.0936 | 0.409639 |
| Msantd1       | chr5:34915914-34923839    | 0.9532   | 0.5794   | -0.7181 | 0.555736 |
| Tufm          | chr7:126487354-126490730  | 4.9191   | 3.8826   | -0.3414 | 0.413533 |
| 4930562F07Rik | chr1:160074734-160077985  | 38.6785  | 43.6062  | 0.1730  | 0.157334 |
| Gm12786       | chr4:107017934-107022499  | 2.5157   | 1.5133   | -0.7333 | 0.276754 |
| Pfn2          | chr3:57841894-57847564    | 2.3867   | 2.9960   | 0.3281  | 0.291191 |
| Adck4         | chr7:27233022-27262252    | 7.2853   | 6.4033   | -0.1862 | 0.348167 |
| Gm16577       | chr10:11212279-11212979   | 5.6011   | 3.7961   | -0.5612 | 0.250658 |
| Foxo3         | chr10:42181840-42276755   | 17.4159  | 16.1384  | -0.1099 | 0.505969 |
| Egr2          | chr10:67535474-67542188   | 24.3344  | 27.1428  | 0.1576  | 0.441888 |
| Glipr1        | chr10:111985447-112002631 | 79.5185  | 86.3510  | 0.1189  | 0.168285 |
| Trim41        | chr11:48806403-48817353   | 15.2695  | 14.0526  | -0.1198 | 0.211318 |
| Kat7          | chr11:95274258-95310246   | 24.2147  | 26.2809  | 0.1181  | 0.170503 |
| Npepps        | chr11:97205841-97280638   | 7.5134   | 6.8987   | -0.1232 | 0.314251 |
| Cnp           | chr11:100574903-100591729 | 51.2115  | 55.3499  | 0.1121  | 0.163799 |
| Gm27029       | chr11:101406691-101424796 | 12.0217  | 13.7941  | 0.1984  | 0.277599 |
| Rnf157        | chr11:116336352-116413032 | 2.2426   | 1.8755   | -0.2578 | 0.522569 |
| Tha1          | chr11:117867951-117873481 | 7.9045   | 6.8961   | -0.1969 | 0.408964 |
| 1110057K04Rik | chr12:8208106-8285758     | 19.5983  | 21.8095  | 0.1542  | 0.249563 |
| Nbas          | chr12:13269126-13583810   | 12.8843  | 14.2870  | 0.1491  | 0.388137 |
| Zfp36l1       | chr12:80107759-80113013   | 37.9668  | 41.6614  | 0.1340  | 0.320293 |
| D930007J09Rik | chr13:32802456-32802849   | 17.2106  | 22.4348  | 0.3824  | 0.465125 |
| 2610204G07Rik | chr13:104684930-104694994 | 14.7705  | 11.7497  | -0.3301 | 0.566797 |
| Arl15         | chr13:113794504-114157461 | 4.9031   | 6.0028   | 0.2919  | 0.445354 |
| Pisd          | chr5:32736300-32785646    | 22.3646  | 24.5903  | 0.1369  | 0.247499 |
| 2410131K14Rik | chr5:118245226-118266093  | 4.5536   | 4.0654   | -0.1636 | 0.123086 |
| B3glct        | chr5:149678229-149762599  | 2.7806   | 2.2610   | -0.2984 | 0.480589 |
| Gabrarpl1     | chr6:129533199-129542331  | 9.7130   | 11.8686  | 0.2892  | 0.515244 |
| Myadm         | chr7:3289037-3299345      | 1.7500   | 2.3218   | 0.4079  | 0.411719 |
| Prpf31        | chr7:3629984-3642486      | 23.9828  | 22.3695  | -0.1005 | 0.431461 |
| Rps16         | chr7:28350651-28352696    | 2.9543   | 1.9430   | -0.6045 | 0.415166 |
| Spint2        | chr7:29256330-29281977    | 24.9904  | 28.7599  | 0.2027  | 0.461642 |
| Josd2         | chr7:44467979-44471652    | 18.2354  | 16.3632  | -0.1563 | 0.462561 |
| Mtmr10        | chr7:64287652-64340407    | 2.4946   | 2.1626   | -0.2060 | 0.308373 |
| Kars          | chr8:111993439-112011323  | 92.8812  | 87.5279  | -0.0856 | 0.440117 |
| Bcl9l         | chr9:44499135-44510388    | 3.7321   | 3.1887   | -0.2270 | 0.450750 |
| Fbxo9         | chr9:78081498-78109065    | 11.3846  | 12.9595  | 0.1869  | 0.342733 |
| Dnajc13       | chr9:104151596-104262930  | 27.1243  | 25.5890  | -0.0841 | 0.365326 |
| Atp6ap1       | chrX:74297096-74304721    | 41.5330  | 39.1766  | -0.0843 | 0.104757 |
| Pja1          | chrX:99465733-99471273    | 17.8434  | 16.0058  | -0.1568 | 0.546292 |
| Fbxo32        | chr15:58175878-58214892   | 4.9613   | 5.8732   | 0.2434  | 0.474988 |
| Gm20712       | chr15:58780460-58781951   | 2.4475   | 1.6551   | -0.5644 | 0.535538 |
| Rnf139        | chr15:58889228-58902390   | 28.8895  | 31.7877  | 0.1379  | 0.371578 |
| 4930431P03Rik | chr14:44955216-44961307   | 7.8060   | 6.9663   | -0.1642 | 0.389331 |
| Gm15629       | chr14:75197072-75199271   | 45.8026  | 37.8730  | -0.2743 | 0.581669 |
| Gpr183        | chr14:121952330-121965193 | 45.5960  | 49.6571  | 0.1231  | 0.249903 |
| Rps2-ps9      | chr17:27784426-27785243   | 0.9623   | 1.6597   | 0.7863  | 0.165712 |
| H2-Q4         | chr17:35379616-35385290   | 103.6013 | 114.2018 | 0.1405  | 0.476078 |
| Abcc1         | chr16:14361557-14475737   | 9.3133   | 10.2640  | 0.1402  | 0.406834 |
| Gm20319       | chr16:26714445-26755502   | 2.8685   | 2.1105   | -0.4427 | 0.000515 |
| C330027C09Rik | chr16:48994184-49019709   | 6.7878   | 7.5766   | 0.1586  | 0.094244 |
| lft57         | chr16:49699232-49765126   | 2.1336   | 2.6792   | 0.3285  | 0.173185 |
| Zfp654        | chr16:64780350-64786321   | 14.8500  | 16.8411  | 0.1815  | 0.486420 |
| Dak           | chr19:10592199-10604258   | 3.3156   | 4.2383   | 0.3542  | 0.412858 |
| Il1rl2        | chr1:40324626-40365471    | 0.9284   | 1.3840   | 0.5760  | 0.214729 |

|               |                           |          |          |         |          |
|---------------|---------------------------|----------|----------|---------|----------|
| Cd84          | chr1:17183966-171890718   | 33.8432  | 37.3242  | 0.1412  | 0.466626 |
| Brox          | chr1:183276341-183297256  | 11.9103  | 13.5493  | 0.1860  | 0.361769 |
| Prrc1         | chr18:57354732-57392719   | 2.6480   | 3.3413   | 0.3355  | 0.396229 |
| Ppargc1b      | chr18:61298135-61400431   | 2.5065   | 2.0476   | -0.2917 | 0.382988 |
| Cdnf          | chr2:3513029-3526376      | 0.6710   | 1.1467   | 0.7732  | 0.388803 |
| A13000612Rik  | chr2:22895320-22895736    | 3.3202   | 2.0075   | -0.7259 | 0.025685 |
| Dph7          | chr2:24962399-24972163    | 9.5286   | 11.2752  | 0.2428  | 0.381469 |
| Fam129b       | chr2:32876113-32925254    | 2.1398   | 2.6163   | 0.2900  | 0.321032 |
| Gm13938       | chr2:76722775-76786708    | 24.5198  | 31.5245  | 0.3625  | 0.512549 |
| Alkbh3        | chr2:93980549-94010807    | 9.8088   | 11.2283  | 0.1950  | 0.298758 |
| B4galt5       | chr2:167298443-167349183  | 13.7133  | 12.0848  | -0.1824 | 0.599768 |
| Cstf1         | chr2:172370680-172382448  | 20.1304  | 18.4842  | -0.1231 | 0.430031 |
| Flad1         | chr3:89401003-89411870    | 14.2437  | 12.9759  | -0.1345 | 0.475982 |
| Gm15471       | chr3:103803128-103808439  | 3.0363   | 2.0722   | -0.5511 | 0.486086 |
| Ndufb6        | chr4:40270590-40279421    | 26.4561  | 32.1175  | 0.2798  | 0.466544 |
| Inip          | chr4:59769636-59801589    | 11.7850  | 10.8454  | -0.1199 | 0.381796 |
| Tmem261       | chr4:75277353-75278305    | 18.9107  | 24.0891  | 0.3492  | 0.525613 |
| Mllt3         | chr4:87769924-88033364    | 19.9278  | 18.7387  | -0.0888 | 0.440533 |
| Ptplad2       | chr4:88396143-88438928    | 1.2247   | 1.0022   | -0.2893 | 0.209311 |
| Nrd1          | chr4:109000654-109061777  | 23.2020  | 21.8209  | -0.0885 | 0.327671 |
| Yrdc          | chr4:124850678-124855242  | 21.2090  | 19.3796  | -0.1301 | 0.166792 |
| Smim12        | chr4:127243783-127247809  | 16.6567  | 20.3057  | 0.2858  | 0.425682 |
| Prkcz         | chr4:155260128-155361361  | 1.0324   | 1.3191   | 0.3535  | 0.355995 |
| Trav21-dv12   | chr14:53875983-53876751   | 5.4989   | 9.4627   | 0.7831  | 0.419199 |
| n-R5s29       | chr17:78858933-78859052   | 14.0707  | 7.4132   | -0.9245 | 0.439980 |
| Gm4540        | chr3:106034661-106035056  | 2.7851   | 1.0936   | -1.3486 | 0.281263 |
| Zglp1         | chr9:21062392-21067093    | 1.1133   | 0.5304   | -0.1697 | 0.468650 |
| Gm10080       | chr9:44374594-44375209    | 1.6039   | 0.6369   | -1.3324 | 0.468735 |
| Rap1b         | chr10:117814470-117845935 | 172.0240 | 187.4729 | 0.1241  | 0.422269 |
| Tespa1        | chr10:130322851-130362642 | 52.8696  | 58.1786  | 0.1380  | 0.295117 |
| Ppfi1         | chr7:144476757-144553729  | 13.1011  | 12.3373  | -0.0867 | 0.269628 |
| Hprt          | chrX:52988136-53021659    | 69.6505  | 78.7437  | 0.1770  | 0.518271 |
| Cryz          | chr3:154597196-154623182  | 0.8175   | 1.3503   | 0.7239  | 0.278778 |
| Gm2044        | chr7:139957004-139958039  | 1.8696   | 3.2104   | 0.7800  | 0.395210 |
| Plk-ps1       | chr5:35554183-35555971    | 2.2891   | 1.5247   | -0.5862 | 0.452283 |
| Ano10         | chr9:122175878-122294374  | 11.5333  | 13.0535  | 0.1786  | 0.177641 |
| Gm15008       | chrX:36910833-36911985    | 2.7348   | 1.2164   | -1.1688 | 0.412969 |
| Slc29a1       | chr17:45585199-45599606   | 29.0861  | 27.1903  | -0.0972 | 0.417755 |
| Bag1          | chr4:40936397-40948281    | 72.1790  | 81.3716  | 0.1729  | 0.493738 |
| Tprn          | chr2:25262617-25269885    | 3.9166   | 4.7643   | 0.2827  | 0.362004 |
| Nup43         | chr10:7667502-7678881     | 8.1222   | 9.8744   | 0.2818  | 0.522825 |
| Rps29         | chr12:69157721-69159186   | 4.4092   | 5.9635   | 0.4356  | 0.177641 |
| 3830406C13Rik | chr14:12284208-12303231   | 13.4946  | 15.4283  | 0.1932  | 0.348564 |
| Tcp1          | chr17:12915700-12925067   | 82.1640  | 75.2121  | -0.1275 | 0.638170 |
| Dab2ip        | chr2:35558265-35730994    | 0.8121   | 1.0580   | 0.3817  | 0.428841 |
| Tk2           | chr8:104226690-104248558  | 31.3896  | 34.6685  | 0.1433  | 0.276886 |
| Ccdc74a       | chr16:17646469-17650738   | 0.9826   | 1.3923   | 0.5028  | 0.194432 |
| Ect2l         | chr10:18129021-18210890   | 1.3006   | 0.9475   | -0.4569 | 0.357229 |
| Samd3         | chr10:26229706-26272172   | 0.9763   | 1.3778   | 0.4969  | 0.452174 |
| Jade2         | chr11:51813454-51857653   | 13.0109  | 14.3132  | 0.1376  | 0.418362 |
| Snord4a       | chr11:78181685-78181756   | 13.3543  | 23.9890  | 0.8451  | 0.495659 |
| Ndufs6        | chr13:73319837-73328542   | 23.9497  | 28.4029  | 0.2460  | 0.447182 |
| Fbxw8         | chr5:118064980-118155458  | 11.0543  | 12.4752  | 0.1745  | 0.439218 |
| Slc8b1        | chr5:120511167-120534024  | 3.8056   | 4.5779   | 0.2666  | 0.349690 |
| Ddx55         | chr5:124552863-124569660  | 8.0836   | 9.1936   | 0.1856  | 0.430019 |
| Trbj1-7       | chr6:41535641-41535686    | 100.0210 | 136.7705 | 0.4515  | 0.364598 |
| Slc37a2       | chr9:37229148-37255738    | 3.3105   | 3.9591   | 0.2581  | 0.455235 |
| Zfp219        | chr14:52006076-52020733   | 8.2243   | 9.3925   | 0.1916  | 0.270224 |
| Tox4          | chr14:52279145-52296391   | 24.4513  | 26.3583  | 0.1083  | 0.097664 |
| Trav6-1       | chr14:52638514-52638962   | 2.0325   | 4.0553   | 0.9965  | 0.338271 |
| D630044L22Rik | chr17:25951471-25963610   | 1.9359   | 1.4725   | -0.3948 | 0.471971 |
| Actr3         | chr1:125392904-125435727  | 147.2259 | 159.0329 | 0.1113  | 0.336718 |
| Gm26642       | chr1:135248560-135266443  | 6.4176   | 7.4006   | 0.2056  | 0.061491 |
| Tmem79        | chr3:88328654-88334504    | 1.4537   | 0.9950   | -0.5470 | 0.559698 |
| Il15          | chr8:82331636-82403222    | 0.5076   | 0.2430   | -1.0624 | 0.329231 |
| Rgag4         | chrX:102066543-102071304  | 0.4070   | 0.7034   | 0.7892  | 0.395175 |
| Gm18588       | chr3:68902266-68902758    | 1.7676   | 3.1092   | 0.8147  | 0.200526 |
| NA            | chr4:119733795-119736768  | 0.6341   | 1.0634   | 0.7458  | 0.333021 |
| P2rx7         | chr5:122643910-122691432  | 32.6059  | 30.1048  | -0.1151 | 0.577915 |
| B3gnt4        | chr5:123510459-123511882  | 3.2123   | 2.4191   | -0.4091 | 0.326211 |
| 1810058124Rik | chr6:35252653-35263496    | 4.7462   | 5.6378   | 0.2484  | 0.282794 |

|                |                           |          |           |         |          |
|----------------|---------------------------|----------|-----------|---------|----------|
| Lpar5          | chr6:125067919-125082472  | 3.6248   | 2.5850    | -0.4877 | 0.489575 |
| Dcaf15         | chr8:84097074-84104773    | 40.1001  | 45.4247   | 0.1799  | 0.516535 |
| Tnfrsf12a      | chr17:23675446-23677449   | 3.1045   | 2.0902    | -0.5707 | 0.388074 |
| Mir1981        | chr1:184822406-184822488  | 10.7213  | 4.4564    | -1.2665 | 0.350413 |
| Znfx1          | chr4:167035792-167063015  | 18.3447  | 20.2185   | 0.1403  | 0.447633 |
| Gm16334        | chr4:152418282-152421834  | 4.0047   | 2.4536    | -0.7068 | 0.569335 |
| Bricd5         | chr17:24473883-24475469   | 8.2061   | 6.4343    | -0.3509 | 0.474507 |
| 9930111J21Rik1 | chr11:48946149-48979398   | 8.6691   | 9.7170    | 0.1646  | 0.276779 |
| Srsf2          | chr11:116849900-116853094 | 121.1347 | 114.5121  | -0.0811 | 0.496913 |
| Ankrd32        | chr13:77043087-77135473   | 6.5465   | 7.3989    | 0.1766  | 0.314511 |
| Gfod2          | chr8:105713853-105758664  | 1.2641   | 0.9449    | -0.4199 | 0.438870 |
| Slc35f2        | chr9:53771534-53818161    | 8.0088   | 6.9725    | -0.1999 | 0.394394 |
| Abhd14b        | chr9:106448639-106452915  | 4.2528   | 5.5734    | 0.3902  | 0.454155 |
| Prrg1          | chrX:78449612-78583896    | 0.9468   | 0.7912    | -0.2590 | 0.292337 |
| Gm23302        | chr14:118585038-118585138 | 9.2438   | 3.7002    | -1.3209 | 0.507559 |
| 4930594M22Rik  | chr14:122913029-122937469 | 1.6118   | 1.2236    | -0.3974 | 0.361780 |
| Jmjd8          | chr17:25828866-25831842   | 31.8975  | 29.7531   | -0.1004 | 0.326520 |
| Tfrc           | chr16:32608919-32632794   | 27.9002  | 25.6171   | -0.1232 | 0.584637 |
| Rasgrp2        | chr19:6399339-6415216     | 11.9540  | 11.2419   | -0.0886 | 0.370411 |
| Gm16726        | chr19:46264538-46267669   | 9.4579   | 7.5676    | -0.3217 | 0.442733 |
| Pik3c2b        | chr1:133045666-133108687  | 0.7774   | 0.6229    | -0.3197 | 0.303888 |
| Slamf1         | chr1:171767126-171801184  | 34.6053  | 38.0945   | 0.1386  | 0.374470 |
| Snord17        | chr2:144265978-144266216  | 912.1002 | 1215.8889 | 0.4147  | 0.546464 |
| Sigmar1        | chr4:41738492-41756157    | 8.1054   | 7.2227    | -0.1663 | 0.282635 |
| Kif9           | chr9:110476993-110525179  | 0.1148   | 0.2576    | 1.1659  | 0.239797 |
| Gm15978        | chr17:87329763-87332052   | 1.1756   | 2.0645    | 0.8124  | 0.321169 |
| Fads1          | chr19:10182887-10196870   | 6.5516   | 5.7709    | -0.1830 | 0.333361 |
| Antxr2         | chr5:97882782-98030733    | 13.7435  | 15.3602   | 0.1605  | 0.425755 |
| Gm24146        | chr5:139844929-139845250  | 20.0345  | 25.4074   | 0.3428  | 0.335287 |
| Msh4           | chr3:153857146-153906138  | 0.4981   | 0.3003    | -0.7302 | 0.335680 |
| Nfe2l1         | chr11:96817413-96829968   | 20.8392  | 19.3360   | -0.1080 | 0.468208 |
| 1700020L24Rik  | chr11:83437685-83441232   | 1.1395   | 2.0124    | 0.8204  | 0.251283 |
| Ankrd17        | chr5:90227189-90366185    | 24.8385  | 23.2761   | -0.0937 | 0.505716 |
| Dfna5          | chr6:50189368-50263862    | 1.6131   | 1.3222    | -0.2869 | 0.418143 |
| Pnpla2         | chr7:141455197-141460743  | 7.5532   | 9.0862    | 0.2666  | 0.526914 |
| Snord57        | chr2:130278015-130278087  | 19.9754  | 9.2357    | -1.1129 | 0.340771 |
| Plekhh1        | chr12:79029162-79081648   | 1.9926   | 2.4308    | 0.2868  | 0.412907 |
| Gm17655        | chr5:110046231-110046486  | 2.5181   | 5.0480    | 1.0034  | 0.276305 |
| Gm4924         | chr10:82378592-82381237   | 0.9226   | 1.3111    | 0.5070  | 0.293175 |
| Hadha          | chr5:30118300-30155162    | 36.7164  | 39.5664   | 0.1079  | 0.148689 |
| Zfp518a        | chr19:40894704-40917947   | 17.5497  | 19.7531   | 0.1706  | 0.511094 |
| Trim30c        | chr7:104382064-104390586  | 0.3216   | 0.6443    | 1.0024  | 0.112619 |
| NA             | chr12:84417193-84418577   | 10.0861  | 11.8527   | 0.2328  | 0.164187 |
| Rnf113a2       | chr12:84417195-84418578   | 10.0861  | 11.8527   | 0.2328  | 0.164187 |
| Fam120aos      | chr13:48968286-48972031   | 9.0238   | 7.8025    | -0.2098 | 0.332853 |
| Gm10767        | chr13:66904913-66909236   | 1.2061   | 1.7242    | 0.5156  | 0.416516 |
| Gm15777        | chr5:100670858-100678105  | 7.7746   | 6.1566    | -0.3366 | 0.319810 |
| Trbv20         | chr6:41188272-41188977    | 64.2627  | 56.9018   | -0.1755 | 0.228964 |
| Krba1          | chr6:48395585-48419855    | 6.8277   | 6.2782    | -0.1211 | 0.433525 |
| Rps25-ps1      | chr6:145266326-145266825  | 4.0782   | 6.8872    | 0.7560  | 0.436554 |
| Tsta3          | chr15:75924683-75929730   | 27.1282  | 23.9545   | -0.1795 | 0.518591 |
| Tubb4a         | chr17:57080065-57087782   | 3.0308   | 2.2797    | -0.4109 | 0.566319 |
| Abi2           | chr1:60409618-60481162    | 7.9556   | 9.0537    | 0.1865  | 0.468938 |
| Sec23b         | chr2:144556228-144590749  | 15.7166  | 17.3057   | 0.1390  | 0.358615 |
| BC068157       | chr8:4209542-4217459      | 0.1440   | 0.2747    | 0.9315  | 0.238220 |
| Atl3           | chr19:7494039-7538608     | 22.8368  | 24.8884   | 0.1241  | 0.315747 |
| St8sia6        | chr2:13651019-13793808    | 8.3121   | 7.4156    | -0.1646 | 0.528290 |
| Elmsan1        | chr12:84149175-84218881   | 8.5630   | 7.6281    | -0.1668 | 0.608240 |
| Fbxo30         | chr10:11281329-11298052   | 0.9303   | 1.3348    | 0.5209  | 0.484341 |
| Gm15561        | chr12:69267770-69273432   | 4.7866   | 3.3890    | -0.4981 | 0.038722 |
| Kctd7          | chr5:130144860-130155806  | 1.8324   | 2.2759    | 0.3127  | 0.364375 |
| Rabif          | chr1:134494659-134507882  | 23.8974  | 21.9985   | -0.1195 | 0.191038 |
| Scx            | chr15:76457437-76459468   | 0.3799   | 0.7826    | 1.0426  | 0.106060 |
| Ltb            | chr17:35194438-35196320   | 313.7602 | 342.2749  | 0.1255  | 0.488807 |
| Chchd10        | chr10:75935572-75937725   | 26.8660  | 22.4164   | -0.2612 | 0.600503 |
| Dynll2         | chr11:87979524-87987533   | 7.8735   | 6.8908    | -0.1923 | 0.384153 |
| Lrch4          | chr5:137629120-137641099  | 35.2281  | 32.5428   | -0.1144 | 0.564701 |
| Sbk1           | chr7:126272618-126294999  | 18.3423  | 16.9243   | -0.1161 | 0.449412 |
| Tnpo2          | chr8:85036914-85057583    | 25.7126  | 24.1259   | -0.0919 | 0.391500 |
| Dcps           | chr9:35124407-35176061    | 33.0653  | 37.1146   | 0.1667  | 0.329272 |
| Gnai2          | chr9:107614137-107635342  | 191.6535 | 208.2223  | 0.1196  | 0.450177 |

|               |                           |          |          |         |          |
|---------------|---------------------------|----------|----------|---------|----------|
| Fyco1         | chr9:123789509-123851899  | 9.6988   | 8.8810   | -0.1271 | 0.548948 |
| Thrb          | chr14:17660959-18038088   | 1.3961   | 1.0650   | -0.3906 | 0.575013 |
| Tnfaip81      | chr17:56162476-56173955   | 12.6715  | 14.3883  | 0.1833  | 0.315996 |
| Lrnf4         | chr19:4611784-4615667     | 1.3245   | 0.7651   | -0.7918 | 0.610480 |
| Btaf1         | chr19:36926078-37012752   | 32.7829  | 30.3301  | -0.1122 | 0.588716 |
| Gm15834       | chr1:58505147-58523230    | 1.4853   | 1.1834   | -0.3279 | 0.349269 |
| Gm15983       | chr16:5254785-5289621     | 0.1795   | 0.3356   | 0.9025  | 0.305985 |
| Gm9833        | chr3:10088172-10092564    | 0.4858   | 0.2020   | -1.2661 | 0.422378 |
| Htati2        | chr7:49759105-49773999    | 14.9926  | 13.1328  | -0.1911 | 0.400067 |
| Dnal4         | chr15:79761452-79777849   | 2.2947   | 3.1925   | 0.4764  | 0.450727 |
| Nif3l1        | chr1:58445150-58481816    | 9.4819   | 10.9811  | 0.2118  | 0.485797 |
| Fam118a       | chr15:85037061-85062828   | 16.0055  | 18.2238  | 0.1873  | 0.409890 |
| Gpr151        | chr18:42578019-42579652   | 2.5835   | 1.9240   | -0.4253 | 0.326915 |
| Gm24082       | chr5:138606698-138606781  | 21.4747  | 36.5860  | 0.7687  | 0.407829 |
| Al182371      | chr2:35084045-35101543    | 0.9798   | 1.3880   | 0.5025  | 0.194546 |
| Rps12         | chr10:23785210-23787195   | 15.6727  | 19.7936  | 0.3368  | 0.405286 |
| Rnf146        | chr10:29344177-29362442   | 21.5758  | 23.9030  | 0.1478  | 0.433642 |
| BC025920      | chr10:81606269-81620703   | 2.6798   | 3.3163   | 0.3075  | 0.353985 |
| 1810014B01Rik | chr10:86685600-86694806   | 53.9674  | 49.9107  | -0.1127 | 0.488991 |
| Helb          | chr10:120083607-120112987 | 18.8911  | 20.8445  | 0.1420  | 0.385912 |
| Timeless      | chr10:128232064-128252941 | 12.0753  | 13.3948  | 0.1496  | 0.378868 |
| AA413626      | chr11:4918509-4919003     | 5.5748   | 3.5765   | -0.6404 | 0.424840 |
| Pold2         | chr11:5872179-5878292     | 28.2618  | 25.3768  | -0.1553 | 0.567702 |
| Adam19        | chr11:46055991-46147343   | 32.2220  | 29.4490  | -0.1298 | 0.641002 |
| Gm12227       | chr11:54728676-54734323   | 10.1609  | 7.8312   | -0.3757 | 0.347070 |
| Trim11        | chr11:58978092-58991458   | 21.4178  | 19.7552  | -0.1166 | 0.472831 |
| Elac2         | chr11:64979037-65002069   | 20.9280  | 19.1398  | -0.1289 | 0.534004 |
| Mink1         | chr11:70562880-70614483   | 12.8764  | 11.6388  | -0.1458 | 0.564036 |
| Lgals9        | chr11:78962973-78984946   | 22.1925  | 24.8740  | 0.1646  | 0.362146 |
| Mrm1          | chr11:84813060-84819515   | 8.5436   | 7.3796   | -0.2113 | 0.521171 |
| Fam134c       | chr11:101096321-101119893 | 41.0925  | 38.9099  | -0.0787 | 0.190515 |
| Gpatch8       | chr11:102475914-102556392 | 12.3315  | 13.5712  | 0.1382  | 0.403651 |
| Ict1os        | chr11:115406585-115408314 | 3.9480   | 2.9653   | -0.4129 | 0.302023 |
| Abhd12b       | chr12:70154141-70183887   | 0.5517   | 0.3451   | -0.6768 | 0.344127 |
| Akap5         | chr12:76324890-76334153   | 0.6213   | 0.4528   | -0.4563 | 0.398473 |
| 4732487G21Rik | chr12:86290760-86306006   | 4.6711   | 5.5790   | 0.2562  | 0.337870 |
| Sel1l         | chr12:91806042-91849157   | 18.2458  | 17.1354  | -0.0906 | 0.449306 |
| Zscan12       | chr13:21362826-21369824   | 7.7246   | 8.9184   | 0.2073  | 0.101849 |
| Nrn1          | chr13:36725624-36734477   | 31.8563  | 36.4537  | 0.1945  | 0.518378 |
| Snrnp48       | chr13:38204938-38227663   | 28.8592  | 32.5674  | 0.1744  | 0.442260 |
| Bloc1s4       | chr5:36747373-36748679    | 7.1184   | 9.1843   | 0.3676  | 0.433884 |
| Mapkapk5      | chr5:121518612-121545905  | 9.9446   | 11.0270  | 0.1491  | 0.322634 |
| Hvcn1         | chr5:122206803-122242297  | 28.4823  | 31.6248  | 0.1510  | 0.475508 |
| Srrt          | chr5:137295703-137307674  | 88.3332  | 83.2085  | -0.0862 | 0.531436 |
| Zfp157        | chr5:138441467-138460694  | 5.4497   | 4.9207   | -0.1473 | 0.505936 |
| Psmg3         | chr5:139823591-139826885  | 4.7943   | 4.0896   | -0.2294 | 0.399072 |
| Lfng          | chr5:140607340-140615543  | 134.0034 | 125.6224 | -0.0932 | 0.565150 |
| Prss2         | chr6:41521786-41525079    | 2.2465   | 3.2868   | 0.5490  | 0.277161 |
| Zfp773        | chr7:7130677-7136755      | 2.1586   | 1.6873   | -0.3554 | 0.388372 |
| Vmn2r29       | chr7:7231326-7278289      | 0.5272   | 0.2807   | -0.9094 | 0.515223 |
| Gm26790       | chr7:35772377-35779168    | 6.2119   | 7.3696   | 0.2466  | 0.322293 |
| Gm22478       | chr7:45388530-45388684    | 8.4297   | 4.4717   | -0.9147 | 0.326567 |
| 5430400D12Rik | chr7:79920754-79922521    | 0.6212   | 0.2520   | -1.3015 | 0.505629 |
| Blm           | chr7:80454992-80535119    | 7.2071   | 6.3855   | -0.1746 | 0.540951 |
| Mesdc2        | chr7:83884465-83901532    | 9.2844   | 10.3387  | 0.1552  | 0.276232 |
| Arap1         | chr7:101348066-101412586  | 16.5998  | 15.2692  | -0.1205 | 0.588677 |
| Gm23262       | chr7:111076059-111076227  | 361.0413 | 511.0360 | 0.5013  | 0.581482 |
| Cog7          | chr7:121922838-121981711  | 3.9242   | 4.7269   | 0.2685  | 0.372018 |
| NA            | chr8:4325226-4348790      | 2.2817   | 1.3642   | -0.7420 | 0.302380 |
| Arglu1        | chr8:8666576-8690537      | 99.0917  | 93.4572  | -0.0845 | 0.384694 |
| Rasa3         | chr8:13566949-13677603    | 93.7600  | 89.4335  | -0.0682 | 0.422578 |
| Cfap97        | chr8:46151770-46195590    | 11.3498  | 12.4528  | 0.1338  | 0.057019 |
| Cklf          | chr8:104250902-104264936  | 8.7012   | 7.6321   | -0.1891 | 0.251877 |
| Fbxo31        | chr8:121549439-121578806  | 6.9780   | 6.1813   | -0.1749 | 0.543727 |
| Ctu2          | chr8:122476142-122484138  | 12.8164  | 11.8713  | -0.1105 | 0.369286 |
| Gm16853       | chr9:21405241-21411720    | 1.9098   | 1.2083   | -0.6605 | 0.238325 |
| Snx19         | chr9:30427328-30466726    | 14.9821  | 13.9866  | -0.0992 | 0.333794 |
| Zfp202        | chr9:40192315-40213604    | 2.3763   | 1.9179   | -0.3092 | 0.464811 |
| Ddx6          | chr9:44604891-44640731    | 41.8943  | 39.0946  | -0.0998 | 0.566826 |
| Imp3          | chr9:56937499-56938397    | 54.5400  | 50.2415  | -0.1184 | 0.188974 |
| Gm26631       | chr9:57531286-57537629    | 8.5238   | 9.9459   | 0.2226  | 0.418943 |

|               |                          |          |          |         |          |
|---------------|--------------------------|----------|----------|---------|----------|
| Pdcd7         | chr9:65346067-65359642   | 12.1422  | 13.9502  | 0.2003  | 0.412518 |
| Lactb         | chr9:66955392-66975484   | 12.3376  | 14.6425  | 0.2471  | 0.522258 |
| Elp6          | chr9:110305191-110322092 | 3.9693   | 4.9729   | 0.3252  | 0.339668 |
| Pdcd6ip       | chr9:113651743-113708259 | 17.4598  | 16.3876  | -0.0914 | 0.357780 |
| Gm9888        | chr9:114780099-114782257 | 6.3451   | 8.8938   | 0.4872  | 0.499640 |
| Gripap1       | chrX:7789764-7820567     | 11.7531  | 10.6033  | -0.1485 | 0.575026 |
| Brc3          | chrX:75416627-75454001   | 6.3090   | 7.0061   | 0.1512  | 0.261546 |
| Pycl          | chr15:75916462-75921560  | 11.7666  | 14.1129  | 0.2623  | 0.421942 |
| Nup50         | chr15:84923427-84942955  | 24.4459  | 23.0302  | -0.0861 | 0.267026 |
| Tymp          | chr15:89371930-89377039  | 10.5098  | 8.7170   | -0.2698 | 0.596068 |
| Twf1          | chr15:94577950-94589889  | 11.7023  | 13.1820  | 0.1718  | 0.290356 |
| Ppp3cb        | chr14:20499363-20546573  | 18.7227  | 17.5281  | -0.0951 | 0.347937 |
| Gm4285        | chr14:75843378-75844964  | 2.9980   | 4.0737   | 0.4424  | 0.141898 |
| Elf1          | chr14:79481193-79582476  | 75.9747  | 81.5908  | 0.1029  | 0.240556 |
| Clcn7         | chr17:25133390-25162104  | 11.2107  | 10.2822  | -0.1247 | 0.447206 |
| Gm16580       | chr17:26269335-26270379  | 3.0048   | 1.9364   | -0.6339 | 0.526573 |
| Tapbp         | chr17:33915898-33929288  | 112.6095 | 123.2138 | 0.1298  | 0.487350 |
| Gm15821       | chr17:34211311-34214459  | 58.6732  | 53.9922  | -0.1200 | 0.487101 |
| Ppt2          | chr17:34616661-34628510  | 5.3182   | 4.4614   | -0.2535 | 0.419349 |
| Mrps18b       | chr17:35910378-35916389  | 7.9453   | 6.9169   | -0.2000 | 0.266008 |
| Cluap1        | chr16:3908800-3941147    | 19.2206  | 17.3324  | -0.1492 | 0.475850 |
| Anks3         | chr16:4941414-4964237    | 20.4776  | 18.6717  | -0.1332 | 0.433071 |
| Wdr5b         | chr16:36041189-36042973  | 14.3178  | 16.4622  | 0.2014  | 0.403021 |
| Trat1         | chr16:48734689-48771956  | 46.5841  | 54.5015  | 0.2265  | 0.511281 |
| Dopey2        | chr16:93711906-93810585  | 9.9331   | 8.8613   | -0.1647 | 0.634044 |
| Cd6           | chr19:10789340-10830058  | 150.7037 | 163.9126 | 0.1212  | 0.460841 |
| Uggt1         | chr1:36141529-36244305   | 41.8633  | 39.8717  | -0.0703 | 0.414077 |
| Actr1b        | chr1:36699201-36714422   | 21.9209  | 20.2305  | -0.1158 | 0.438259 |
| Dtymk         | chr1:93792575-93801934   | 24.2372  | 22.4170  | -0.1126 | 0.314333 |
| B230216N24Rik | chr1:98031115-98057680   | 0.4775   | 0.7266   | 0.6057  | 0.479448 |
| Mir5117       | chr1:161037355-161037439 | 23.6490  | 38.7065  | 0.7108  | 0.349058 |
| Gm5687        | chr18:12898426-12899066  | 2.9927   | 4.7573   | 0.6687  | 0.290707 |
| Sil1          | chr18:35266399-35498925  | 11.6807  | 13.6913  | 0.2291  | 0.385212 |
| BC031181      | chr18:75005899-75009933  | 27.3812  | 31.7105  | 0.2118  | 0.422377 |
| Gm13375       | chr2:20969053-20969997   | 1.8541   | 0.9123   | -1.0232 | 0.563584 |
| Gm9823        | chr2:29738334-29738665   | 47.9265  | 41.3970  | -0.2113 | 0.343539 |
| Sp3os         | chr2:72979423-72988677   | 5.3542   | 7.0274   | 0.3923  | 0.398044 |
| Eif2ak4       | chr2:118388617-118475234 | 6.1901   | 5.6106   | -0.1418 | 0.491042 |
| Vps18         | chr2:119288739-119298453 | 6.3840   | 5.5645   | -0.1982 | 0.503194 |
| Slc30a4       | chr2:122681232-122702663 | 4.4958   | 3.7944   | -0.2447 | 0.624372 |
| 1810024B03Rik | chr2:127186354-127208280 | 0.5120   | 0.8368   | 0.7088  | 0.240142 |
| Zfp335os      | chr2:164911353-164919953 | 3.2615   | 4.1784   | 0.3574  | 0.048911 |
| BC046401      | chr2:165857683-165859034 | 2.5771   | 1.7381   | -0.5683 | 0.224964 |
| Atp9a         | chr2:168634437-168742409 | 5.1820   | 6.1289   | 0.2421  | 0.495423 |
| Zfp931        | chr2:178067694-178078476 | 4.2045   | 3.4029   | -0.3052 | 0.522600 |
| Ttc14         | chr3:33799954-33814860   | 35.5420  | 33.3844  | -0.0904 | 0.523281 |
| Lamtor2       | chr3:88549818-88553074   | 9.7802   | 12.2060  | 0.3197  | 0.497987 |
| NA            | chr3:90062795-90068347   | 7.1645   | 6.2503   | -0.1969 | 0.397849 |
| Gm16731       | chr4:46535900-46539802   | 19.4536  | 22.4894  | 0.2092  | 0.212363 |
| Rad23b        | chr4:55350042-55392237   | 35.3167  | 38.6716  | 0.1309  | 0.463468 |
| Junos         | chr4:95051533-95167318   | 0.2791   | 0.5507   | 0.9808  | 0.376797 |
| Hpd1          | chr4:116819906-116821508 | 1.3212   | 0.7126   | -0.8908 | 0.539184 |
| Cap1          | chr4:122859046-122886056 | 201.7920 | 215.2710 | 0.0933  | 0.184498 |
| Dnal1         | chr4:125055337-125065703 | 1.6415   | 1.1822   | -0.4735 | 0.383663 |
| Srsf10        | chr4:135855746-135869908 | 20.0592  | 18.6253  | -0.1070 | 0.542842 |
| Wnt4          | chr4:137277488-137299726 | 0.3497   | 0.1889   | -0.8887 | 0.355950 |
| Sh2d5         | chr4:138250402-138261332 | 0.5716   | 0.3819   | -0.5818 | 0.294680 |
| Gm20421       | chr4:154960769-154961678 | 1.3241   | 0.5019   | -1.3995 | 0.493347 |
| Tcrg-C4       | chr13:19342185-19352343  | 4.6970   | 2.7696   | -0.7620 | 0.421568 |
| Kndc1         | chr7:139894695-139941537 | 0.0415   | 0.1027   | 1.3058  | 0.290572 |
| Gm24629       | chr8:105203992-105204081 | 9.6799   | 3.9887   | -1.2791 | 0.365184 |
| Dnase113      | chr14:7964532-7994573    | 0.1328   | 0.2792   | 1.0727  | 0.250118 |
| Gm5499        | chr17:87078262-87080230  | 0.2822   | 0.6526   | 1.2095  | 0.368021 |
| Gm15539       | chr16:3927605-3928171    | 3.0654   | 1.9216   | -0.6738 | 0.338689 |
| Gm16026       | chr1:85266697-85285491   | 0.2715   | 0.4791   | 0.8196  | 0.310583 |
| 1700040D17Rik | chr3:94409394-94412883   | 0.5979   | 1.1592   | 0.9552  | 0.191447 |
| Hcn2          | chr10:79716633-79736108  | 0.3575   | 0.6546   | 0.8724  | 0.437638 |
| Gm7452        | chr6:36956643-36960417   | 0.2965   | 0.1124   | -1.3996 | 0.508855 |
| B4galnt3      | chr6:120203072-120294559 | 0.3167   | 0.1549   | -1.0315 | 0.522926 |
| Trav5-1       | chr14:52622565-52623082  | 2.1833   | 4.1774   | 0.9361  | 0.378537 |
| Gm23205       | chr18:38297938-38298041  | 10.8756  | 6.0633   | -0.8429 | 0.425648 |



|               |                           |          |          |         |          |
|---------------|---------------------------|----------|----------|---------|----------|
| Shb           | chr4:45423277-45532470    | 0.1100   | 0.2260   | 1.0391  | 0.268546 |
| 0610009L18Rik | chr11:120348677-120351190 | 4.5328   | 6.6881   | 0.5612  | 0.483213 |
| Ascc1         | chr10:60002804-60099990   | 14.7412  | 13.1741  | -0.1621 | 0.227083 |
| Mir678        | chr10:76207325-76207409   | 16.2676  | 9.2266   | -0.8181 | 0.385270 |
| Rdh5          | chr10:128913592-128922888 | 11.3317  | 10.0596  | -0.1718 | 0.498208 |
| Figl1         | chr11:11787430-11808962   | 9.3162   | 10.5063  | 0.1734  | 0.447141 |
| Gm26563       | chr11:80017353-80029868   | 9.3162   | 8.3843   | -0.1521 | 0.385493 |
| Trim47        | chr11:116105751-116127210 | 0.4572   | 0.7743   | 0.7602  | 0.198223 |
| Prkar2b       | chr12:31958475-32061296   | 1.0743   | 1.4719   | 0.4543  | 0.448583 |
| Ppm1a         | chr12:72761210-72794940   | 31.9080  | 35.4838  | 0.1532  | 0.448601 |
| Slc39a9       | chr12:80644214-80683341   | 7.4988   | 8.4101   | 0.1655  | 0.268609 |
| Ccdc88c       | chr12:100912699-101028983 | 67.6011  | 62.9316  | -0.1033 | 0.619861 |
| Yy1           | chr12:108792972-108816632 | 43.3525  | 40.9696  | -0.0816 | 0.240426 |
| Tchp          | chr5:114707759-114722327  | 5.4429   | 6.2449   | 0.1983  | 0.242158 |
| Casp2         | chr6:42264984-42282508    | 15.2013  | 16.5631  | 0.1238  | 0.263771 |
| Ube3a         | chr7:59228751-59306727    | 33.3676  | 30.7024  | -0.1201 | 0.602175 |
| Wdr73         | chr7:80890722-80901269    | 9.8583   | 8.9712   | -0.1360 | 0.329533 |
| Trim30d       | chr7:104470013-104507849  | 13.9455  | 18.1760  | 0.3822  | 0.446554 |
| Lrrc27        | chr7:139212987-139242979  | 0.5734   | 0.8163   | 0.5096  | 0.227394 |
| Haus8         | chr8:71248560-71272934    | 6.3206   | 5.5835   | -0.1789 | 0.520187 |
| Rbm15b        | chr9:106880928-106882289  | 15.4329  | 13.6062  | -0.1817 | 0.295367 |
| Xiap          | chrX:42059678-42109656    | 16.2760  | 17.8674  | 0.1346  | 0.423757 |
| Apln          | chrX:48025145-48034853    | 0.3822   | 0.6721   | 0.8142  | 0.420696 |
| Emd           | chrX:74254686-74261548    | 18.7167  | 20.7554  | 0.1492  | 0.247237 |
| Gdi1          | chrX:74304997-74311862    | 31.4685  | 29.4005  | -0.0981 | 0.507549 |
| Nox1          | chrX:134086420-134221956  | 1.4535   | 2.0197   | 0.4746  | 0.416589 |
| Snord72       | chr15:5118403-5118484     | 21.4295  | 35.7920  | 0.7400  | 0.410943 |
| 2610037D02Rik | chr15:96134818-96283608   | 0.8902   | 0.6840   | -0.3801 | 0.203189 |
| Gm20683       | chr17:25834464-25841763   | 17.9844  | 16.1460  | -0.1556 | 0.557925 |
| Pfdn6         | chr17:33938820-33940343   | 27.0865  | 31.4880  | 0.2172  | 0.494958 |
| Tmem63b       | chr17:45660170-45686905   | 3.0599   | 2.6493   | -0.2079 | 0.301099 |
| Rrp36         | chr17:46667457-46674255   | 21.6283  | 24.7997  | 0.1974  | 0.324125 |
| Tbc1d5        | chr17:50733126-51179349   | 6.7514   | 7.5885   | 0.1686  | 0.315944 |
| Chaf1a        | chr17:56040415-56068026   | 13.0585  | 11.7346  | -0.1542 | 0.515323 |
| Cebpzos       | chr17:78916498-78921037   | 11.9215  | 14.0987  | 0.2420  | 0.411711 |
| Gm15585       | chr16:17092814-17096350   | 3.0913   | 4.7655   | 0.6244  | 0.461016 |
| N6amt1        | chr16:87354184-87368742   | 2.9463   | 2.5902   | -0.1859 | 0.238201 |
| 4931406G06Rik | chr16:91044655-91056677   | 0.7509   | 1.2724   | 0.7607  | 0.416331 |
| Unc93b1       | chr19:3935185-3949340     | 9.4024   | 10.9707  | 0.2225  | 0.471573 |
| Fermt3        | chr19:698957-7019469      | 123.0030 | 134.1835 | 0.1255  | 0.474782 |
| Zdhhc16       | chr19:41933471-41944095   | 19.8704  | 18.0556  | -0.1382 | 0.336039 |
| Vcpip1        | chr1:9718621-9748382      | 13.7320  | 12.7173  | -0.1108 | 0.582500 |
| Hmgxb3        | chr18:61131278-61177050   | 16.4271  | 15.2601  | -0.1063 | 0.421949 |
| Cntrl         | chr2:35109491-35178822    | 54.5537  | 58.6493  | 0.1044  | 0.334466 |
| Taf4a         | chr2:179912145-179976646  | 9.0878   | 7.9038   | -0.2014 | 0.634623 |
| Rusc1         | chr3:89083980-89093363    | 8.6175   | 9.7439   | 0.1772  | 0.339424 |
| Gm12657       | chr4:94593649-94600310    | 2.6272   | 1.8209   | -0.5289 | 0.165611 |
| Exo5          | chr4:120921195-120925017  | 11.7343  | 13.5644  | 0.2091  | 0.391654 |
| Gm12174       | chr11:46727817-46728630   | 0.4023   | 0.9502   | 1.2402  | 0.443849 |
| Noxred1       | chr12:87221254-87233556   | 0.7812   | 1.7095   | 1.1298  | 0.494245 |
| Cspg5         | chr9:110243782-110262575  | 0.5905   | 0.3447   | -0.7765 | 0.454792 |
| 4930412O13Rik | chr2:9881251-9883921      | 0.5754   | 1.0863   | 0.9168  | 0.362917 |
| Gm12847       | chr4:115818856-115822655  | 6.5843   | 3.8923   | -0.7584 | 0.542493 |
| Ndufs5        | chr4:123712709-123718202  | 2.2176   | 3.6992   | 0.7382  | 0.353839 |
| Gm6583        | chr5:112353800-112356033  | 0.2807   | 0.6199   | 1.1430  | 0.478176 |
| Hepacam2      | chr6:3457095-3494498      | 0.4077   | 0.1856   | -1.1352 | 0.511337 |
| Asf1a         | chr10:53596960-53609213   | 21.2823  | 19.3801  | -0.1351 | 0.449099 |
| 9630013K17Rik | chr11:63964225-63968040   | 0.9388   | 0.4248   | -1.1439 | 0.218010 |
| Tnpo3         | chr6:29540826-29609887    | 21.2990  | 20.1056  | -0.0832 | 0.443364 |
| Rab12         | chr17:66494511-66519717   | 9.4068   | 8.2592   | -0.1877 | 0.550876 |
| Mkl2          | chr16:13256480-13417529   | 4.8687   | 4.3050   | -0.1775 | 0.612567 |
| Phpt1         | chr2:25573429-25575224    | 9.5781   | 12.0279  | 0.3286  | 0.471457 |
| Trav6-2       | chr14:52667410-52667864   | 1.3268   | 2.9970   | 1.1756  | 0.334871 |
| Gm15713       | chr16:43410517-43420196   | 2.8264   | 1.6466   | -0.7795 | 0.611941 |
| Rpl5-ps2      | chr2:154703808-154704699  | 0.7068   | 1.2371   | 0.8075  | 0.193686 |
| Iqsec1        | chr6:90659597-90810123    | 4.2192   | 3.6110   | -0.2246 | 0.625147 |
| Epcam         | chr17:87635978-87651106   | 10.8512  | 12.5699  | 0.2121  | 0.387602 |
| Slc4a11       | chr2:130684112-130697519  | 0.2096   | 0.3717   | 0.8264  | 0.303050 |
| Zmiz1         | chr14:25459184-25666743   | 3.3712   | 2.8522   | -0.2412 | 0.669745 |
| 1700109H08Rik | chr5:3571565-3584356      | 13.8940  | 11.3302  | -0.2943 | 0.490929 |
| Gm2420        | chr5:32724351-32736194    | 1.4115   | 2.2712   | 0.6862  | 0.302832 |

|               |                           |         |         |         |          |
|---------------|---------------------------|---------|---------|---------|----------|
| Mettl10       | chr7:132827456-132852673  | 14.6336 | 16.6594 | 0.1870  | 0.265835 |
| Gm10509       | chr17:21690765-21691024   | 2.7207  | 5.6546  | 1.0554  | 0.334851 |
| Ppp1r3fos     | chrX:7573599-7581015      | 13.2264 | 14.6874 | 0.1512  | 0.272109 |
| C130026121Rik | chr1:84992689-85270566    | 1.4210  | 1.9170  | 0.4320  | 0.464527 |
| Lats1         | chr10:7681208-7716458     | 12.1985 | 11.3945 | -0.0984 | 0.389366 |
| Lyrm7         | chr11:54826865-54860916   | 0.6062  | 0.9782  | 0.6903  | 0.334483 |
| Tmem107       | chr11:69070805-69073293   | 1.6918  | 0.9664  | -0.8079 | 0.459957 |
| Tmem256       | chr11:69838513-69839618   | 9.6012  | 12.0810 | 0.3315  | 0.531698 |
| Sap25         | chr5:137641333-137642902  | 22.7798 | 20.5494 | -0.1487 | 0.442966 |
| Lmtk2         | chr5:144100435-144188204  | 12.5081 | 11.4866 | -0.1229 | 0.579628 |
| 2210013021Rik | chrX:153723589-153741264  | 6.7722  | 8.7612  | 0.3715  | 0.414223 |
| Gm17058       | chr15:99765990-99782332   | 0.8534  | 1.3962  | 0.7101  | 0.099896 |
| Bak1          | chr17:27019809-27029009   | 25.1238 | 28.5700 | 0.1854  | 0.550585 |
| 2610318N02Rik | chr16:17113398-17125106   | 2.7121  | 1.9376  | -0.4851 | 0.472619 |
| Gm6611        | chr16:32923217-32924489   | 7.8330  | 6.1514  | -0.3486 | 0.545539 |
| Tmem138       | chr19:10570477-10577362   | 5.3651  | 6.5415  | 0.2860  | 0.275008 |
| Gm13349       | chr2:18338578-18338989    | 4.5381  | 2.3960  | -0.9215 | 0.390955 |
| Mrrf          | chr2:36136388-36190647    | 5.5287  | 4.7358  | -0.2233 | 0.425878 |
| Scamp3        | chr3:89177472-89182765    | 30.2607 | 27.5778 | -0.1339 | 0.547398 |
| Ndufaf4       | chr4:24898082-24905001    | 8.9828  | 7.8595  | -0.1927 | 0.571918 |
| Fbxo44        | chr4:148152799-148160482  | 1.7143  | 2.1911  | 0.3540  | 0.291579 |
| Crb3          | chr17:57059104-57065918   | 0.4516  | 0.8675  | 0.9419  | 0.351473 |
| Cep57         | chr9:13807791-13827107    | 15.8712 | 17.6845 | 0.1561  | 0.438909 |
| Gm22579       | chr9:15316675-15316808    | 72.4836 | 57.8831 | -0.3245 | 0.535541 |
| Arxes2        | chrX:135993819-135995359  | 3.2929  | 4.3048  | 0.3866  | 0.465197 |
| Snhg1         | chr19:8723495-8726442     | 35.5625 | 40.4182 | 0.1846  | 0.600067 |
| Ckap5         | chr2:91526761-91620664    | 30.9292 | 33.2839 | 0.1059  | 0.313125 |
| Gm7805        | chr17:21964135-21964583   | 1.7752  | 3.6287  | 1.0315  | 0.386799 |
| Dnajc2        | chr5:21757266-21785251    | 27.2100 | 25.3216 | -0.1038 | 0.537772 |
| Cdk5r1        | chr11:80477045-80481179   | 2.2045  | 2.7424  | 0.3150  | 0.482628 |
| Papola        | chr12:105784693-105838944 | 39.4636 | 37.6352 | -0.0684 | 0.252630 |
| Gm8806        | chrX:80533744-80535151    | 1.6429  | 2.4353  | 0.5678  | 0.477143 |
| Unkl          | chr17:25188396-25234443   | 5.4951  | 6.2521  | 0.1862  | 0.375922 |
| Dusp23        | chr1:172630768-172632974  | 1.9280  | 1.3979  | -0.4639 | 0.061532 |
| 9830144P21Rik | chr2:129205957-129230579  | 5.4614  | 4.7838  | -0.1911 | 0.488147 |
| Rsph3b        | chr17:6904715-6948356     | 0.8861  | 1.5467  | 0.8037  | 0.428007 |
| Tab2          | chr10:7905652-7956230     | 23.3760 | 25.2106 | 0.1090  | 0.221827 |
| Ltv1          | chr10:13178639-13193137   | 30.7983 | 27.9911 | -0.1379 | 0.539836 |
| Gm6963        | chr10:39424617-39424996   | 8.7296  | 6.3833  | -0.4516 | 0.273927 |
| Slc16a10      | chr10:40033534-40142254   | 1.7705  | 1.4537  | -0.2844 | 0.460201 |
| D830039M14Rik | chr10:61475244-61476937   | 0.5844  | 0.2629  | -1.1522 | 0.369209 |
| Dip2a         | chr10:76259428-76345291   | 2.6591  | 3.1074  | 0.2248  | 0.420376 |
| Gm4925        | chr10:88729540-88731101   | 0.8539  | 0.4149  | -1.0413 | 0.344704 |
| Tbk1          | chr10:121546454-121586794 | 38.1863 | 41.8401 | 0.1318  | 0.403035 |
| Prim1         | chr10:128015167-128030037 | 13.9071 | 12.7929 | -0.1205 | 0.464696 |
| Cnpy2         | chr10:128322458-128327187 | 33.2771 | 37.6186 | 0.1769  | 0.388354 |
| Gas2l1        | chr11:5054131-5065327     | 0.5569  | 0.7557  | 0.4403  | 0.355401 |
| Anp32-ps      | chr11:33394878-33395266   | 2.5233  | 3.9412  | 0.6433  | 0.128463 |
| Fndc9         | chr11:46235530-46239872   | 5.6118  | 4.7710  | -0.2342 | 0.341942 |
| Gm12250       | chr11:58183842-58190198   | 52.5048 | 57.6837 | 0.1357  | 0.477019 |
| Mprip         | chr11:59661304-59780860   | 11.1924 | 10.5590 | -0.0841 | 0.469749 |
| Elp5          | chr11:69968221-69982517   | 15.2330 | 17.2142 | 0.1764  | 0.392848 |
| Synrg         | chr11:83964427-84044578   | 11.4934 | 10.7845 | -0.0918 | 0.408301 |
| Trim37        | chr11:87127076-87220683   | 7.3619  | 6.7881  | -0.1171 | 0.374518 |
| Cox11         | chr11:90638172-90644931   | 5.7725  | 7.0881  | 0.2962  | 0.304947 |
| Aarsd1        | chr11:101406838-101417615 | 10.5884 | 12.0657 | 0.1884  | 0.333828 |
| Gm11675       | chr11:111276099-111276931 | 1.9997  | 1.0500  | -0.9295 | 0.399781 |
| Lgals3bp      | chr11:118392750-118402092 | 23.3675 | 29.8601 | 0.3537  | 0.476607 |
| NA            | chr12:87442682-87444017   | 13.2174 | 11.5011 | -0.2007 | 0.388764 |
| Cpsf2         | chr12:101975973-102005993 | 24.0415 | 26.2791 | 0.1284  | 0.402553 |
| Ckb           | chr12:111669354-111672338 | 5.8196  | 7.1450  | 0.2960  | 0.397318 |
| Trmt61a       | chr12:111678104-111683902 | 9.8068  | 8.7097  | -0.1712 | 0.403973 |
| Wdr37         | chr13:8802967-8871909     | 9.9404  | 9.3166  | -0.0935 | 0.301506 |
| Gmnn          | chr13:24751844-24761923   | 13.1904 | 15.5306 | 0.2356  | 0.419760 |
| Irf4          | chr13:30749225-30766927   | 42.3961 | 39.6922 | -0.0951 | 0.582639 |
| Phf2os1       | chr13:48871111-48875460   | 8.9059  | 6.7981  | -0.3896 | 0.345547 |
| Gzmk          | chr13:113171607-113225908 | 1.6028  | 2.6809  | 0.7422  | 0.519377 |
| 4933427G23Rik | chr5:23815617-23831897    | 1.2778  | 0.9283  | -0.4609 | 0.258593 |
| Nub1          | chr5:24685814-24710555    | 41.3105 | 44.5841 | 0.1100  | 0.219729 |
| Tmem214       | chr5:30869578-30879191    | 12.0983 | 11.1107 | -0.1229 | 0.567481 |
| Bre           | chr5:31697683-32084962    | 7.9880  | 9.0637  | 0.1823  | 0.452730 |

|               |                           |          |          |         |          |
|---------------|---------------------------|----------|----------|---------|----------|
| Ociad1        | chr5:73292793-73314077    | 38.5760  | 42.1104  | 0.1265  | 0.413999 |
| Zfp326        | chr5:105876564-105915818  | 3.5151   | 3.1500   | -0.1582 | 0.382371 |
| Miat          | chr5:112213227-112229395  | 0.6850   | 0.3393   | -1.0137 | 0.401837 |
| Selp1g        | chr5:113817797-113830501  | 142.8931 | 155.6406 | 0.1233  | 0.508400 |
| 4930515G01Rik | chr5:114773736-114774983  | 1.9701   | 2.7077   | 0.4588  | 0.213044 |
| Rnf10         | chr5:115241411-115272898  | 18.9566  | 17.6640  | -0.1019 | 0.441028 |
| Cux1          | chr5:136248134-136567490  | 6.8190   | 6.3552   | -0.1016 | 0.468987 |
| Ttyh3         | chr5:140620585-140649031  | 4.7475   | 4.1158   | -0.2060 | 0.503325 |
| Kdelr2        | chr5:143403819-143421900  | 22.7358  | 25.5348  | 0.1675  | 0.420109 |
| Dag1b         | chr5:143464492-143504442  | 4.7266   | 4.1448   | -0.1895 | 0.551487 |
| Smurf1        | chr5:144876494-144965847  | 9.7590   | 8.9934   | -0.1179 | 0.462391 |
| Mtus2         | chr5:147957319-148316065  | 0.1202   | 0.2354   | 0.9695  | 0.403441 |
| Smarcad1      | chr6:65042666-65116050    | 16.1922  | 15.0785  | -0.1028 | 0.436193 |
| Copg1         | chr6:87887813-87913595    | 23.0239  | 21.8915  | -0.0728 | 0.437064 |
| Slc25a26      | chr6:94500313-94604648    | 5.1572   | 4.2114   | -0.2923 | 0.484542 |
| Ptms          | chr6:124913680-124917946  | 33.0288  | 37.5862  | 0.1865  | 0.567741 |
| Erp27         | chr6:136907310-136922180  | 1.2767   | 0.9484   | -0.4288 | 0.335178 |
| Gm17216       | chr6:148213366-148214573  | 5.0956   | 6.6768   | 0.3899  | 0.386975 |
| Napa          | chr7:16098457-16117975    | 25.7548  | 23.9423  | -0.1053 | 0.517860 |
| Fbl           | chr7:28169747-28179269    | 3.7628   | 2.9433   | -0.3543 | 0.154928 |
| Zfp382        | chr7:30121941-30134665    | 8.5606   | 9.9516   | 0.2172  | 0.372120 |
| Psenen        | chr7:30561867-30563184    | 2.8692   | 4.1177   | 0.5212  | 0.220764 |
| Snord35b      | chr7:45123024-45123111    | 59.2898  | 46.3541  | -0.3551 | 0.277181 |
| Gm16464       | chr7:104501054-104502149  | 3.7720   | 2.5481   | -0.5659 | 0.505086 |
| lpo7          | chr7:110018424-110055114  | 65.3646  | 61.1233  | -0.0968 | 0.554314 |
| Slx1b         | chr7:126689467-126695784  | 6.4522   | 5.7009   | -0.1786 | 0.474409 |
| Gm26690       | chr7:127982569-127984881  | 3.3821   | 2.6276   | -0.3642 | 0.536155 |
| Proz          | chr8:13060907-13075006    | 1.4788   | 2.0002   | 0.4357  | 0.336274 |
| Champ1        | chr8:13869640-13881639    | 14.0475  | 15.3868  | 0.1314  | 0.139667 |
| Rnf170        | chr8:26119367-26143871    | 4.2289   | 5.0619   | 0.2594  | 0.557958 |
| Gm24727       | chr8:33691800-33691944    | 8.5894   | 14.4769  | 0.7531  | 0.214784 |
| Cnot7         | chr8:40492539-40515847    | 14.4354  | 13.5680  | -0.0894 | 0.153237 |
| Klhl26        | chr8:70450227-70476943    | 6.2933   | 5.4258   | -0.2140 | 0.496969 |
| Ccdc130       | chr8:84257794-84270380    | 5.6233   | 6.6444   | 0.2407  | 0.373629 |
| Gadd45gip1    | chr8:84831521-84835482    | 27.9880  | 25.6648  | -0.1250 | 0.532951 |
| Mast1         | chr8:84911902-84937359    | 0.6648   | 0.4751   | -0.4846 | 0.516882 |
| Nlrc5         | chr8:94472762-94527272    | 95.8535  | 89.9996  | -0.0909 | 0.640048 |
| Nae1          | chr8:104511027-104534637  | 10.9408  | 12.1377  | 0.1498  | 0.485209 |
| Hsbp1         | chr8:119344537-119348927  | 48.7431  | 54.1632  | 0.1521  | 0.415276 |
| Gm24455       | chr9:15313801-15313932    | 11.7220  | 19.3369  | 0.7221  | 0.323949 |
| Thyn1         | chr9:26999676-27007330    | 42.6704  | 39.1824  | -0.1230 | 0.148297 |
| Snord14c      | chr9:40803582-40803668    | 43.1556  | 30.2487  | -0.5127 | 0.389447 |
| Dyx1c1        | chr9:72958784-72973064    | 1.8812   | 2.4571   | 0.3853  | 0.205072 |
| Lrrc1         | chr9:77430822-77544059    | 10.2120  | 9.0090   | -0.1808 | 0.499148 |
| Gclc          | chr9:77754534-77794485    | 20.1001  | 22.0968  | 0.1366  | 0.322641 |
| Gm20425       | chr9:103190207-103230307  | 6.8421   | 7.9327   | 0.2134  | 0.347011 |
| Qrich1        | chr9:108517086-108560167  | 72.0967  | 77.4789  | 0.1039  | 0.246603 |
| Tmem158       | chr9:123259057-123260789  | 3.1341   | 4.0788   | 0.3801  | 0.486812 |
| Apoo          | chrX:94367116-94417093    | 1.2511   | 0.6437   | -0.9588 | 0.566033 |
| Gm15726       | chrX:169979046-169985232  | 3.2895   | 2.0780   | -0.6627 | 0.305209 |
| Wdr70         | chr15:7873054-8099209     | 8.9765   | 7.7579   | -0.2105 | 0.470976 |
| Matn2         | chr15:34306679-34436242   | 8.8212   | 9.9273   | 0.1704  | 0.278795 |
| Trappc9       | chr15:72589620-73061204   | 7.1202   | 7.9687   | 0.1624  | 0.363707 |
| Gm15945       | chr15:75661406-75663529   | 1.1053   | 1.9672   | 0.8317  | 0.418303 |
| Tcea1-ps1     | chr15:90882614-90883518   | 6.2518   | 8.1438   | 0.3814  | 0.519850 |
| Tmem106c      | chr15:97964228-97970286   | 5.3124   | 6.7712   | 0.3500  | 0.471004 |
| Galnt6        | chr15:100691812-100729376 | 76.2178  | 72.0444  | -0.0812 | 0.521321 |
| Ube2e2        | chr14:18573574-18894267   | 0.2275   | 0.1140   | -0.9965 | 0.410545 |
| Arhgef3       | chr14:27238038-27403904   | 142.4831 | 152.7112 | 0.1000  | 0.326290 |
| Hnrnpc        | chr14:52073379-52104028   | 71.2966  | 66.4118  | -0.1024 | 0.600826 |
| Zdhhc20       | chr14:57832701-57890262   | 46.3634  | 50.2346  | 0.1157  | 0.393346 |
| Cog3          | chr14:75702350-75754493   | 21.8279  | 23.8237  | 0.1262  | 0.236623 |
| Tagap         | chr17:7925999-7934897     | 50.5925  | 47.6602  | -0.0861 | 0.474090 |
| NA            | chr17:12232480-12271184   | 19.0447  | 17.6502  | -0.1097 | 0.254552 |
| NA            | chr17:14978863-14991577   | 1.2045   | 0.7810   | -0.6250 | 0.372420 |
| Chd1          | chr17:15704966-15772610   | 32.9474  | 31.2704  | -0.0754 | 0.461107 |
| Vmn1r-ps145   | chr17:20969060-20969484   | 2.0481   | 0.8536   | -1.2626 | 0.520890 |
| Pgp           | chr17:24470472-24471591   | 16.3560  | 13.8911  | -0.2357 | 0.509289 |
| Neurl1b       | chr17:26414828-26446349   | 0.6975   | 0.8976   | 0.3638  | 0.301045 |
| Zfp952        | chr17:32993128-33005457   | 8.6834   | 7.7867   | -0.1573 | 0.531466 |
| Tap1          | chr17:34187552-34197225   | 88.5786  | 96.6080  | 0.1252  | 0.499926 |

|               |                           |          |          |         |          |
|---------------|---------------------------|----------|----------|---------|----------|
| H2-Eb1        | chr17:34305882-34316199   | 5.7103   | 7.3197   | 0.3582  | 0.495973 |
| Gm5815        | chr17:58593658-58594843   | 1.0897   | 0.5462   | -0.9965 | 0.400359 |
| Mcfd2         | chr17:87254657-87265935   | 7.6176   | 9.0917   | 0.2552  | 0.443924 |
| Ubald1        | chr16:4874777-4880315     | 7.8714   | 7.1905   | -0.1305 | 0.442887 |
| Car15         | chr16:17835275-17838364   | 3.4654   | 4.4149   | 0.3493  | 0.152281 |
| Zbtb20        | chr16:42875880-43642602   | 3.5953   | 3.2658   | -0.1387 | 0.663590 |
| B130034C11Rik | chr16:87495998-87504033   | 0.8080   | 1.3124   | 0.6997  | 0.411308 |
| Chaf1b        | chr16:93883900-93906115   | 7.0800   | 7.8981   | 0.1578  | 0.238745 |
| Aip           | chr19:4114445-4125858     | 26.1674  | 29.0661  | 0.1516  | 0.352316 |
| Rhod          | chr19:4425458-4439432     | 0.9950   | 1.5243   | 0.6153  | 0.386957 |
| Tm7sf2        | chr19:6062820-6068373     | 4.8130   | 5.5592   | 0.2080  | 0.210045 |
| Pcna-ps2      | chr19:9283237-9284494     | 2.4774   | 1.6537   | -0.5831 | 0.516376 |
| 2410127L17Rik | chr19:18670779-18704788   | 2.1666   | 2.8096   | 0.3749  | 0.382188 |
| Rdh10         | chr1:16105773-16133734    | 2.6127   | 3.1816   | 0.2842  | 0.396986 |
| Rpl10a-ps1    | chr1:64993923-64994631    | 7.0624   | 9.4384   | 0.4184  | 0.388914 |
| Gpc1          | chr1:92831644-92860198    | 3.5823   | 3.0022   | -0.2549 | 0.461005 |
| Fam72a        | chr1:131527902-131539872  | 1.1797   | 1.5947   | 0.4349  | 0.041279 |
| Taf1a         | chr1:183388980-183409353  | 13.4063  | 11.5892  | -0.2101 | 0.467985 |
| Zfp532        | chr18:65580229-65689443   | 0.0777   | 0.0317   | -1.2940 | 0.519130 |
| Mbd2          | chr18:70568188-70626131   | 61.7632  | 66.2715  | 0.1016  | 0.167680 |
| Me2           | chr18:73770039-73815392   | 45.8663  | 50.5732  | 0.1409  | 0.438184 |
| Stamos        | chr2:14070331-14073934    | 2.1419   | 1.0606   | -1.0141 | 0.454590 |
| Dnm1          | chr2:32308470-32353329    | 0.2626   | 0.1468   | -0.8394 | 0.363227 |
| Fam102a       | chr2:32535331-32569756    | 22.2604  | 20.7417  | -0.1019 | 0.534417 |
| Nmi           | chr2:51948486-51973494    | 36.4525  | 40.2239  | 0.1420  | 0.376878 |
| Gcg           | chr2:62474529-62483650    | 0.2626   | 0.6969   | 1.4081  | 0.438319 |
| Gm26558       | chr2:70661247-70662108    | 4.3911   | 3.2880   | -0.4174 | 0.262435 |
| Rapgef4os2    | chr2:72224687-72232302    | 0.4642   | 0.8201   | 0.8211  | 0.369615 |
| Rcn1          | chr2:105386290-105399319  | 26.6385  | 24.6196  | -0.1137 | 0.534806 |
| Elp4          | chr2:105697319-105904564  | 2.4002   | 2.7643   | 0.2038  | 0.176822 |
| Chst14        | chr2:118926496-118928585  | 2.2035   | 1.5524   | -0.5053 | 0.341810 |
| Chp1          | chr2:119547696-119587027  | 16.5367  | 18.3817  | 0.1526  | 0.415639 |
| Ciao1         | chr2:127240937-127247816  | 15.1477  | 17.0223  | 0.1683  | 0.410398 |
| Zc3h8         | chr2:128926267-128944077  | 8.0337   | 6.7498   | -0.2512 | 0.420244 |
| Ttl           | chr2:129065941-129096283  | 2.2372   | 1.9307   | -0.2125 | 0.285187 |
| Mrps26        | chr2:130563741-130568695  | 7.7713   | 8.8022   | 0.1797  | 0.388437 |
| 6430590A07Rik | chr3:40885896-40894123    | 6.4556   | 5.1529   | -0.3252 | 0.377740 |
| Mam13         | chr3:51687610-52104891    | 1.0944   | 0.8935   | -0.2927 | 0.330051 |
| Comm2         | chr3:57642903-57651715    | 4.5209   | 5.2068   | 0.2038  | 0.382343 |
| Rapgef2       | chr3:79062515-79181340    | 7.2370   | 7.9580   | 0.1370  | 0.431210 |
| 6330549D23Rik | chr3:96606658-96629820    | 1.2711   | 0.8570   | -0.5688 | 0.601767 |
| Wdr47         | chr3:108591278-108645719  | 6.3986   | 5.6258   | -0.1857 | 0.543978 |
| Stxbp3a       | chr3:108793175-108840526  | 11.8940  | 11.0806  | -0.1022 | 0.293929 |
| Vav3          | chr3:109340652-109685698  | 10.1799  | 9.3233   | -0.1268 | 0.522227 |
| Pigk          | chr3:152714099-152980408  | 8.6423   | 8.0638   | -0.1000 | 0.340601 |
| Dpy19l4       | chr4:11261314-11322137    | 7.1308   | 7.9733   | 0.1611  | 0.468802 |
| Tln1          | chr4:43531518-43562691    | 120.7258 | 113.4363 | -0.0899 | 0.634613 |
| Exosc3        | chr4:45316612-45342732    | 31.3131  | 36.1000  | 0.2052  | 0.523816 |
| Usp1          | chr4:98923809-98935543    | 25.6865  | 28.1567  | 0.1325  | 0.358971 |
| Gm12744       | chr4:106587096-106589108  | 13.4192  | 9.9818   | -0.4269 | 0.571828 |
| Gm17300       | chr4:132351771-132353382  | 256.0596 | 325.0762 | 0.3443  | 0.520355 |
| Znf41-ps      | chr4:145825236-145829942  | 1.1505   | 1.5593   | 0.4387  | 0.225861 |
| Gm13205       | chr4:148947491-148948914  | 4.6753   | 2.8581   | -0.7100 | 0.296631 |
| Spsb1         | chr4:149896282-149955043  | 2.7094   | 2.2877   | -0.2441 | 0.456407 |
| Ctcf          | chr10:24595441-24598683   | 0.3012   | 0.1447   | -1.0582 | 0.399670 |
| Heatr9        | chr11:83511735-83522175   | 0.6614   | 1.1304   | 0.7732  | 0.312085 |
| Ccdc40        | chr11:119228571-119265236 | 0.2548   | 0.4193   | 0.7186  | 0.243826 |
| Gm15819       | chr5:63923900-63924969    | 1.1460   | 2.3612   | 1.0429  | 0.309690 |
| Gm4875        | chr6:117997206-117997992  | 1.1515   | 0.4966   | -1.2132 | 0.345496 |
| Gm16044       | chr7:128692688-128693138  | 9.7605   | 6.2229   | -0.6494 | 0.493449 |
| 4931415C17Rik | chr8:12672185-12679229    | 0.7456   | 0.4186   | -0.8330 | 0.565709 |
| Purg          | chr8:33386324-33417468    | 1.3570   | 2.1213   | 0.6445  | 0.362338 |
| Gm10658       | chr9:57056629-57071966    | 0.8273   | 1.4171   | 0.7764  | 0.326816 |
| Ky            | chr9:102506137-102546238  | 0.1869   | 0.3309   | 0.8243  | 0.320286 |
| Gm7331        | chrX:162566815-162567309  | 1.0674   | 1.9882   | 0.8974  | 0.174825 |
| Ccdc152       | chr15:3280626-3303526     | 1.2430   | 0.6304   | -0.9794 | 0.420870 |
| Rsph1         | chr17:31255018-31277356   | 0.3303   | 0.7500   | 1.1831  | 0.250108 |
| A930006K02Rik | chr16:91465103-91470121   | 4.7464   | 7.4558   | 0.6515  | 0.477501 |
| Tigd3         | chr19:5891138-5894107     | 0.5271   | 0.9130   | 0.7925  | 0.394366 |
| Lmo2          | chr2:103957985-103981878  | 0.2650   | 0.5046   | 0.9293  | 0.210615 |
| Gm14292       | chr2:179177424-179177880  | 4.9057   | 2.8304   | -0.7934 | 0.397619 |

|               |                           |         |          |         |          |
|---------------|---------------------------|---------|----------|---------|----------|
| Mxra8         | chr4:155839679-155844088  | 0.1675  | 0.3761   | 1.1673  | 0.428849 |
| 9830147E19Rik | chr7:42609525-42642588    | 0.4052  | 0.6903   | 0.7687  | 0.488793 |
| Pls3          | chrX:75785653-75875182    | 0.2572  | 0.1015   | -1.3420 | 0.523544 |
| Slc9b1        | chr3:135348028-135397827  | 0.2161  | 0.1128   | -0.9376 | 0.208069 |
| Epor          | chr9:21958898-21963576    | 0.1927  | 0.4134   | 1.1015  | 0.393709 |
| Dazap1        | chr10:80261485-80288408   | 32.1507 | 35.3639  | 0.1374  | 0.414956 |
| Ewsr1         | chr11:5069688-5099266     | 62.2700 | 59.7838  | -0.0588 | 0.216075 |
| Iba57         | chr11:59155368-59163739   | 3.2657  | 2.7658   | -0.2397 | 0.555607 |
| Psm6          | chr12:55384221-55418454   | 59.3120 | 66.1778  | 0.1580  | 0.484551 |
| Smek1         | chr12:101039408-101083702 | 63.5445 | 60.5809  | -0.0689 | 0.382030 |
| Sema4d        | chr13:51701245-51793747   | 24.1692 | 21.8401  | -0.1462 | 0.692359 |
| Hrh2          | chr13:54192128-54222432   | 3.2110  | 3.8251   | 0.2525  | 0.090370 |
| Rgs14         | chr13:55369731-55384687   | 45.6881 | 49.6237  | 0.1192  | 0.324145 |
| Ankib1        | chr5:3689999-3803109      | 29.6447 | 31.8674  | 0.1043  | 0.214284 |
| Zfp111        | chr7:24193946-24211443    | 0.1679  | 0.2646   | 0.6558  | 0.433572 |
| Crtc3         | chr7:80586626-80688877    | 6.1694  | 6.9074   | 0.1630  | 0.503754 |
| Pdzd9         | chr7:120659295-120670343  | 1.2758  | 2.0355   | 0.6740  | 0.343348 |
| Sirt3         | chr7:140863669-140882309  | 2.3323  | 3.2330   | 0.4711  | 0.485609 |
| Tspan32os     | chr7:142988968-143008033  | 15.6363 | 12.9083  | -0.2766 | 0.633680 |
| Ii18          | chr9:50575272-50581837    | 1.6912  | 2.8810   | 0.7685  | 0.429737 |
| Arih1         | chr9:59388257-59486618    | 30.3695 | 32.6928  | 0.1064  | 0.325625 |
| Pls1          | chr9:95752641-95845311    | 0.1009  | 0.2256   | 1.1609  | 0.390202 |
| Atf4          | chr15:80255183-80257540   | 97.2135 | 105.8958 | 0.1234  | 0.439155 |
| Traj17        | chr14:54201774-54201837   | 31.6769 | 45.2584  | 0.5148  | 0.287109 |
| Stambpl1      | chr19:34192228-34240333   | 16.9071 | 15.6242  | -0.1139 | 0.525635 |
| Vti1a         | chr19:55316350-55626561   | 13.9940 | 15.6500  | 0.1614  | 0.447245 |
| Paqr8         | chr1:20890621-20938755    | 4.1204  | 4.7139   | 0.1942  | 0.223622 |
| Lancl1        | chr1:67000516-67038872    | 7.3645  | 8.2846   | 0.1698  | 0.338121 |
| NA            | chr1:151344368-151344736  | 29.4687 | 24.0241  | -0.2947 | 0.521398 |
| Trmt1l        | chr1:151428647-151458182  | 28.9897 | 26.9432  | -0.1056 | 0.441122 |
| Slamf6        | chr1:171917536-171943868  | 86.7478 | 92.9511  | 0.0996  | 0.154348 |
| Plcb2         | chr2:118707516-118728438  | 24.4201 | 22.8092  | -0.0985 | 0.592917 |
| D3Erd254e     | chr3:36159521-36170335    | 3.5903  | 3.2005   | -0.1658 | 0.378553 |
| Gm10704       | chr3:88576244-88577208    | 8.1302  | 10.0284  | 0.3027  | 0.400759 |
| Dnttip2       | chr3:122274413-122285269  | 44.9731 | 41.8025  | -0.1055 | 0.551362 |
| Trim14        | chr4:46494818-46536141    | 20.0802 | 18.0808  | -0.1513 | 0.604838 |
| Gm12808       | chr4:109754413-109754817  | 2.3575  | 0.9214   | -1.3554 | 0.510726 |
| Ptprf         | chr4:118208212-118291405  | 0.7707  | 0.6270   | -0.2976 | 0.329843 |
| Gm13213       | chr4:133638209-133638683  | 2.1138  | 1.0661   | -0.9875 | 0.307538 |
| Ube4bos1      | chr4:149347884-149365277  | 3.5591  | 2.9013   | -0.2948 | 0.552337 |
| Dffb          | chr4:153964448-153975126  | 8.5058  | 7.4545   | -0.1903 | 0.427714 |
| Dnmt3aos      | chr12:3859292-3862244     | 1.3962  | 0.7970   | -0.8089 | 0.547840 |
| Tmem116       | chr5:121451892-121524183  | 1.2972  | 1.9166   | 0.5632  | 0.415078 |
| D030047H15Rik | chr7:4126339-4136926      | 0.1348  | 0.3195   | 1.2446  | 0.337071 |
| Ndr4          | chr8:95676979-95715119    | 0.0787  | 0.1981   | 1.3307  | 0.380651 |
| 4930577N17Rik | chr3:51277570-51279805    | 1.1599  | 2.3691   | 1.0303  | 0.360763 |
| Gm22716       | chr5:110677123-110677230  | 5.1427  | 10.0368  | 0.9647  | 0.398153 |
| Crif1         | chr8:70493157-70504081    | 0.4995  | 0.2389   | -1.0643 | 0.495988 |
| Cd40lg        | chrX:57212142-57224042    | 4.9366  | 3.9801   | -0.3107 | 0.298968 |
| BC147527      | chr13:120308145-120308649 | 25.2448 | 29.8115  | 0.2399  | 0.303364 |
| Gm15522       | chr5:34650717-34652477    | 8.4479  | 6.8111   | -0.3107 | 0.413199 |
| Rnf141        | chr7:110800431-110844457  | 3.7018  | 4.2397   | 0.1957  | 0.291370 |
| Gm9755        | chr8:67513999-67515606    | 0.8916  | 0.4776   | -0.9006 | 0.508270 |
| Sp1           | chr15:102406142-102436404 | 34.8444 | 37.2837  | 0.0976  | 0.184595 |
| 2700099C18Rik | chr17:94750099-94775132   | 2.3510  | 3.0577   | 0.3792  | 0.452186 |
| Bbip1         | chr19:53929676-53944627   | 29.8775 | 32.5111  | 0.1219  | 0.149341 |
| Hdac4         | chr1:91932756-92148393    | 12.6139 | 11.3065  | -0.1579 | 0.613967 |
| Vamp4         | chr1:162570514-162599084  | 8.5740  | 9.6209   | 0.1662  | 0.371761 |
| Slc17a9       | chr2:180725262-180742280  | 13.8279 | 12.5788  | -0.1366 | 0.509801 |
| Gm17135       | chr5:143922576-143980991  | 1.8056  | 0.8696   | -1.0541 | 0.395643 |
| 4632433K11Rik | chr7:50341117-5035246     | 2.4614  | 3.9385   | 0.6782  | 0.450732 |
| Paqr5         | chr9:61953480-62026856    | 0.1257  | 0.2541   | 1.0158  | 0.486006 |
| Dgat1         | chr15:76502014-76511951   | 10.8641 | 12.4071  | 0.1916  | 0.477693 |
| Sec14l2       | chr11:4097038-4123415     | 1.2394  | 0.9337   | -0.4086 | 0.274920 |
| Cct6b         | chr11:82719249-82764321   | 0.6326  | 0.3053   | -1.0512 | 0.364027 |
| Syng12        | chr11:117809667-117814283 | 41.2678 | 46.0175  | 0.1572  | 0.501575 |
| Card14        | chr11:119307767-119345375 | 2.1534  | 1.7372   | -0.3099 | 0.506723 |
| Chn2          | chr6:54039553-54301810    | 3.1434  | 2.7570   | -0.1892 | 0.395290 |
| Rab43         | chr6:87788852-87812164    | 15.3820 | 16.8957  | 0.1354  | 0.423834 |
| Mmp21         | chr7:133674269-133680061  | 0.9327  | 0.6424   | -0.5381 | 0.405463 |
| Mcoln1        | chr8:3500456-3515232      | 10.0766 | 8.8709   | -0.1838 | 0.611609 |

|               |                           |          |          |         |          |
|---------------|---------------------------|----------|----------|---------|----------|
| Amfr          | chr8:93971587-94012663    | 55.2115  | 59.0591  | 0.0972  | 0.133911 |
| P2ry10        | chrX:107088491-107104974  | 95.1928  | 103.6339 | 0.1226  | 0.503301 |
| Gm6472        | chrX:152909503-152910155  | 18.9760  | 23.5392  | 0.3109  | 0.528824 |
| Mkl1          | chr15:81012280-81190757   | 13.0489  | 11.4921  | -0.1833 | 0.702637 |
| Rem2          | chr14:54476099-54480431   | 2.0630   | 1.4935   | -0.4661 | 0.570867 |
| Lipa          | chr19:34492317-34527474   | 35.5458  | 39.6144  | 0.1563  | 0.542055 |
| Cdc73         | chr1:143598796-143702893  | 3.8393   | 3.4063   | -0.1726 | 0.624898 |
| Soat1         | chr1:156428107-156474328  | 24.4172  | 22.9486  | -0.0895 | 0.484842 |
| Slc9a8        | chr2:167421711-167477000  | 10.1215  | 9.2844   | -0.1245 | 0.616584 |
| Gm12940       | chr4:127033730-127049398  | 35.1035  | 32.3984  | -0.1157 | 0.539584 |
| Iffo2         | chr4:139530547-139620382  | 10.2462  | 9.4950   | -0.1099 | 0.445565 |
| Dnah1         | chr14:31260374-31323896   | 0.0611   | 0.1085   | 0.8294  | 0.173453 |
| 4933413G19Rik | chr6:128375455-128385144  | 0.1599   | 0.4187   | 1.3886  | 0.321557 |
| Fgd6          | chr10:94036000-94145339   | 2.1066   | 2.5590   | 0.2807  | 0.624298 |
| Mir3062       | chr11:68990573-68990678   | 23.9804  | 15.9729  | -0.5862 | 0.536987 |
| Slc16a11      | chr11:70212751-70216417   | 0.7180   | 0.4294   | -0.7418 | 0.559554 |
| Nploc4        | chr11:120380369-120437708 | 17.7018  | 16.4218  | -0.1083 | 0.550546 |
| Mfsd2b        | chr12:4862439-4874359     | 0.6603   | 0.4653   | -0.5049 | 0.558325 |
| Mboat1        | chr13:30136497-30246717   | 8.9869   | 8.0050   | -0.1669 | 0.551592 |
| Rbm48         | chr5:3583977-3596585      | 10.3918  | 9.5196   | -0.1265 | 0.100041 |
| Crygn         | chr5:24751002-24758008    | 2.6488   | 1.7196   | -0.6233 | 0.245277 |
| Pigg          | chr5:108312608-108349355  | 4.3636   | 3.7245   | -0.2285 | 0.607671 |
| Oas2          | chr5:120730332-120749853  | 2.6677   | 2.0825   | -0.3573 | 0.645315 |
| Zscan21       | chr5:138116902-138134265  | 7.8704   | 7.1124   | -0.1461 | 0.253627 |
| Brca2         | chr5:150522629-150569746  | 3.8842   | 3.4766   | -0.1599 | 0.577720 |
| Tmem168       | chr6:13580686-13608100    | 16.9493  | 18.5472  | 0.1300  | 0.396629 |
| Cct7          | chr6:85451504-85468477    | 105.5889 | 98.9716  | -0.0934 | 0.612713 |
| Mrps25        | chr6:92169524-92184033    | 17.9764  | 19.5640  | 0.1221  | 0.351114 |
| Apobec1       | chr6:122577791-122602444  | 11.8828  | 14.1091  | 0.2478  | 0.586385 |
| Emg1          | chr6:124704380-124712178  | 92.2309  | 102.0439 | 0.1459  | 0.507525 |
| Zfp788        | chr7:41633202-41651534    | 6.2029   | 7.0277   | 0.1801  | 0.351625 |
| Il4i1         | chr7:44816369-44840809    | 1.5587   | 1.9334   | 0.3108  | 0.368698 |
| Chd2          | chr7:73426690-73541746    | 48.7004  | 45.7875  | -0.0890 | 0.633173 |
| Fam160a2      | chr7:105371210-105373718  | 2.0631   | 1.6015   | -0.3654 | 0.440034 |
| Mgmt          | chr7:136894610-137128187  | 1.7090   | 1.0527   | -0.6990 | 0.286876 |
| Mns1          | chr9:72438528-72458574    | 8.4884   | 9.9676   | 0.2317  | 0.354783 |
| Nckipsd       | chr9:108808379-108818366  | 2.3543   | 2.9386   | 0.3198  | 0.426500 |
| Cdcp1         | chr9:123170823-123216038  | 1.2615   | 1.5834   | 0.3279  | 0.549861 |
| Slc25a53      | chrX:136981115-137038302  | 1.7246   | 2.0246   | 0.2313  | 0.356099 |
| Nadk2         | chr15:9071259-9110487     | 6.1944   | 7.0303   | 0.1826  | 0.253857 |
| Tab1          | chr15:80133153-80161701   | 11.0786  | 12.4159  | 0.1644  | 0.324995 |
| E430024P14Rik | chr17:7881105-7946426     | 11.0496  | 10.2378  | -0.1101 | 0.404024 |
| Pkd1          | chr17:24549949-24596514   | 12.7408  | 11.7453  | -0.1174 | 0.635734 |
| Mpv17l        | chr16:13903160-13949619   | 0.3351   | 0.1837   | -0.8671 | 0.277118 |
| Hira          | chr16:18877036-18970309   | 9.9171   | 9.1382   | -0.1180 | 0.461845 |
| Rwdd2b        | chr16:87433406-87440573   | 8.0121   | 7.0030   | -0.1942 | 0.317039 |
| Calhm2        | chr19:47105352-47138294   | 8.6863   | 7.8886   | -0.1390 | 0.435760 |
| Rabgap1l      | chr1:160219173-160792938  | 39.1321  | 43.1270  | 0.1402  | 0.573802 |
| Nudt5         | chr2:5845018-5871895      | 11.4972  | 10.4940  | -0.1317 | 0.589263 |
| Gm24342       | chr2:10509583-10509687    | 7.9697   | 3.4113   | -1.2242 | 0.303661 |
| Rbm43         | chr2:51924447-51935163    | 19.9891  | 22.4304  | 0.1662  | 0.474980 |
| Cir1          | chr2:73283104-73312701    | 1.5585   | 2.0495   | 0.3951  | 0.408048 |
| Slc12a6       | chr2:112265824-112363163  | 36.1899  | 34.2732  | -0.0785 | 0.572215 |
| Smox          | chr2:131491495-131525922  | 3.8159   | 4.4772   | 0.2306  | 0.394894 |
| Gm11476       | chr2:167553313-167607845  | 0.7151   | 0.3915   | -0.8689 | 0.428296 |
| Rab22a        | chr2:173659759-173707343  | 12.5757  | 11.8143  | -0.0901 | 0.323868 |
| Aph1a         | chr3:95893968-95898288    | 3.5996   | 3.0164   | -0.2550 | 0.447007 |
| Ap4b1         | chr3:103809519-103822025  | 14.3227  | 16.0917  | 0.1680  | 0.373654 |
| NA            | chr4:144972622-144974683  | 4.1071   | 3.4695   | -0.2434 | 0.153417 |
| Snord95       | chr11:48803138-48803206   | 20.8551  | 34.4297  | 0.7233  | 0.265340 |
| Gm3608        | chr1:105455970-105458829  | 0.6123   | 0.9739   | 0.6697  | 0.420457 |
| Gm22567       | chr18:65427468-65427810   | 2.3975   | 3.8793   | 0.6943  | 0.275033 |
| Mief2         | chr11:60728397-60732951   | 8.1796   | 7.1038   | -0.2034 | 0.595091 |
| Malsu1        | chr6:49073794-49086751    | 7.2145   | 8.2213   | 0.1885  | 0.317438 |
| Nhlrc1        | chr13:47012557-47014850   | 1.4417   | 0.8147   | -0.8234 | 0.570141 |
| Gm12183       | chr11:48751759-48753770   | 7.8027   | 6.8848   | -0.1806 | 0.203058 |
| Gm26083       | chr11:117077242-117077435 | 51.7855  | 62.4571  | 0.2703  | 0.473521 |
| Gtpbp6        | chr5:110103974-110108197  | 14.2405  | 12.9442  | -0.1377 | 0.489778 |
| BC065397      | chrX:136741823-136803364  | 2.8710   | 2.4437   | -0.2325 | 0.237301 |
| E4f1          | chr17:24443791-24455311   | 21.6486  | 20.0004  | -0.1142 | 0.446298 |
| Dus3l         | chr17:56764750-56770092   | 17.1127  | 19.4553  | 0.1851  | 0.500864 |

|               |                           |          |          |         |          |
|---------------|---------------------------|----------|----------|---------|----------|
| Crem          | chr18:3266047-3337748     | 4.5206   | 5.1082   | 0.1763  | 0.332731 |
| Dpm1          | chr2:168209047-168230591  | 7.0980   | 6.5423   | -0.1176 | 0.425357 |
| Impa1         | chr3:10313539-10331439    | 28.1631  | 26.5832  | -0.0833 | 0.261293 |
| Dtnbos        | chr12:3752542-3762146     | 0.3789   | 0.7441   | 0.9736  | 0.531508 |
| Flywch2       | chr17:23776915-23786081   | 0.9079   | 1.5714   | 0.7914  | 0.232071 |
| Trib3         | chr2:152337421-152344032  | 1.0983   | 0.7424   | -0.5650 | 0.418400 |
| Zfp386        | chr12:116047723-116063360 | 10.0471  | 11.1573  | 0.1512  | 0.506139 |
| Epb4.1        | chr4:131923412-132075321  | 13.7861  | 13.0808  | -0.0758 | 0.205529 |
| Amz2          | chr11:109425945-109452813 | 12.2169  | 11.4017  | -0.0996 | 0.410791 |
| Gm13012       | chr4:137882369-137883937  | 15.1397  | 12.9171  | -0.2291 | 0.479901 |
| Pdia6         | chr12:17266544-17284770   | 41.8972  | 45.4892  | 0.1187  | 0.416673 |
| Ubl5          | chr9:20642877-20647140    | 24.9133  | 27.8083  | 0.1586  | 0.532715 |
| Ndufa11       | chr17:56717761-56724248   | 9.1702   | 10.6037  | 0.2096  | 0.491383 |
| Gm16907       | chr13:63289600-63297147   | 33.4511  | 30.0755  | -0.1535 | 0.657952 |
| Plekha5       | chr6:140424098-140594906  | 5.5661   | 6.4963   | 0.2229  | 0.586541 |
| A330040F15Rik | chr19:12585867-12596566   | 2.0476   | 1.3223   | -0.6309 | 0.431659 |
| Ppm1f         | chr16:16896468-16927364   | 18.2968  | 17.1246  | -0.0955 | 0.444643 |
| Rasgrp4       | chr7:29134853-29153961    | 3.8019   | 3.3728   | -0.1728 | 0.507670 |
| Tm4sf20       | chr1:82756648-82768461    | 0.6253   | 1.0158   | 0.6999  | 0.414509 |
| Ccn1          | chr3:65946150-65958249    | 52.5970  | 50.0860  | -0.0706 | 0.495973 |
| Prdm1         | chr10:44437176-44528501   | 8.5790   | 11.2215  | 0.3874  | 0.491667 |
| Evpl          | chr11:116220558-116238077 | 0.2789   | 0.1620   | -0.7834 | 0.359603 |
| D5Ertd579e    | chr5:36584787-36696024    | 8.2884   | 9.1035   | 0.1353  | 0.409652 |
| Cacna1d       | chr14:30039948-30491156   | 1.3520   | 1.6936   | 0.3250  | 0.594075 |
| Nhlrc2        | chr19:56548260-56598846   | 16.8335  | 15.3558  | -0.1325 | 0.604818 |
| E2f6          | chr12:16810964-16826743   | 6.6637   | 7.7667   | 0.2210  | 0.360234 |
| Bsn           | chr9:108096022-108190384  | 0.6270   | 0.5173   | -0.2775 | 0.543558 |
| Ywhaq         | chr12:21390070-21417637   | 12.3145  | 14.3044  | 0.2161  | 0.568734 |
| Zfp568        | chr7:29983954-30028282    | 5.4021   | 4.9366   | -0.1300 | 0.437299 |
| Cox7a1        | chr7:30184170-30186028    | 2.3712   | 1.0267   | -1.2075 | 0.499646 |
| Map3k5        | chr10:19934471-20142753   | 25.3472  | 27.4987  | 0.1175  | 0.395946 |
| Fbrs          | chr7:127485220-127491513  | 10.6879  | 9.3837   | -0.1877 | 0.571781 |
| Khynyn        | chr14:55884968-55896781   | 49.7466  | 46.5643  | -0.0954 | 0.628855 |
| Mars          | chr10:127296220-127311786 | 23.7685  | 21.9459  | -0.1151 | 0.571102 |
| Gpr89         | chr3:96868280-96905346    | 6.1576   | 5.5764   | -0.1430 | 0.452592 |
| Pgm2          | chr4:99929413-99987294    | 18.9023  | 20.8815  | 0.1437  | 0.401019 |
| Xylb          | chr9:119357380-119393797  | 0.4840   | 0.2580   | -0.9078 | 0.385868 |
| Gm11977       | chr11:6781677-6783138     | 0.2597   | 0.5803   | 1.1602  | 0.371308 |
| Gemin5        | chr11:58120001-58168539   | 13.2073  | 12.2317  | -0.1107 | 0.545704 |
| lft122        | chr6:115853469-115926699  | 1.1454   | 0.9469   | -0.2745 | 0.414837 |
| Adck5         | chr15:76576357-76595816   | 10.3470  | 11.5481  | 0.1584  | 0.286140 |
| Syne4         | chr7:30314806-30319046    | 1.1683   | 0.7391   | -0.6605 | 0.508649 |
| Eva1b         | chr4:126147743-126149875  | 14.6629  | 16.7304  | 0.1903  | 0.457940 |
| Gm16150       | chr1:38235419-38246666    | 2.6741   | 1.7360   | -0.6233 | 0.352492 |
| Mir671        | chr5:24592113-24592211    | 13.1718  | 6.8772   | -0.9375 | 0.575122 |
| 1810011H11Rik | chr14:32785962-32817968   | 2.4601   | 3.4250   | 0.4774  | 0.546078 |
| Top1          | chr2:160645887-160722764  | 16.8677  | 15.7518  | -0.0987 | 0.598880 |
| Amot          | chrX:145446424-145505181  | 0.1622   | 0.0798   | -1.0235 | 0.415269 |
| Actg1         | chr11:120345689-120348542 | 11.8595  | 13.1881  | 0.1532  | 0.157135 |
| Gm27031       | chr13:95954593-95957171   | 0.5647   | 0.2859   | -0.9816 | 0.451046 |
| Pfkfb1        | chrX:150588228-150643878  | 1.8237   | 1.4982   | -0.2837 | 0.340743 |
| Trappc2       | chrX:166440573-166453140  | 2.0274   | 1.5886   | -0.3518 | 0.526631 |
| Hnrnpa1       | chr15:103240431-103244955 | 8.4081   | 9.7301   | 0.2107  | 0.290328 |
| Gm20468       | chr17:26861442-26897886   | 2.2421   | 0.9630   | -1.2193 | 0.502981 |
| Zap70         | chr1:36761860-36782816    | 126.6608 | 137.2268 | 0.1156  | 0.478361 |
| Carf          | chr1:60098246-60151032    | 4.6250   | 3.7560   | -0.3002 | 0.680137 |
| lth5          | chr2:10153570-10256529    | 15.8338  | 14.7671  | -0.1006 | 0.535953 |
| Gm26594       | chr3:95855965-95861485    | 0.8906   | 0.4450   | -1.0011 | 0.422582 |
| Limk2         | chr11:3344255-3409189     | 21.6338  | 20.3322  | -0.0895 | 0.540874 |
| Gm11346       | chr13:24597612-24604925   | 15.1806  | 13.6358  | -0.1548 | 0.571582 |
| Secisbp2      | chr13:51651696-51684044   | 18.2582  | 17.0688  | -0.0972 | 0.452267 |
| Tmem136       | chr9:43108652-43116570    | 0.6877   | 0.4863   | -0.4999 | 0.322513 |
| Fndc8         | chr11:82892123-82900801   | 0.1874   | 0.4136   | 1.1422  | 0.318149 |
| Rpl21-ps4     | chr14:11227551-11227992   | 2.6185   | 1.4840   | -0.8193 | 0.442162 |
| Vamp3         | chr4:151047299-151057963  | 14.2000  | 15.7471  | 0.1492  | 0.281261 |
| Gm5637        | chrX:60045110-60046229    | 1.4360   | 2.1488   | 0.5814  | 0.360632 |
| Bloc1s6os     | chr2:122733289-122738362  | 1.4420   | 2.8323   | 0.9739  | 0.469262 |
| Bcl2l13       | chr6:120836229-120892842  | 8.7279   | 8.0383   | -0.1187 | 0.538130 |
| Ube2s         | chr7:4808154-4812351      | 8.8546   | 10.9213  | 0.3026  | 0.437497 |
| Zfp128        | chr7:12881176-12893422    | 3.3936   | 2.9697   | -0.1925 | 0.233467 |
| Gm16183       | chr8:84611201-84617184    | 0.5834   | 1.0848   | 0.8950  | 0.438109 |

|            |                           |          |          |         |          |
|------------|---------------------------|----------|----------|---------|----------|
| Ddx46      | chr13:55635026-55681256   | 37.0198  | 35.1963  | -0.0729 | 0.413677 |
| Zfp746     | chr6:48062394-48086593    | 16.8663  | 18.4986  | 0.1333  | 0.323446 |
| Tmprss9    | chr10:80879719-80899441   | 0.3801   | 0.6415   | 0.7552  | 0.536665 |
| Spag7      | chr11:70663770-70669416   | 20.9892  | 23.5366  | 0.1653  | 0.308782 |
| Upf2       | chr2:5951468-6056703      | 17.7110  | 16.4934  | -0.1028 | 0.558146 |
| Pgs1       | chr11:117986291-118024011 | 13.4635  | 12.4042  | -0.1182 | 0.563628 |
| Adamts6    | chr13:104287872-104494763 | 31.7283  | 29.4477  | -0.1076 | 0.608908 |
| Trib1      | chr15:59648349-59656550   | 5.9079   | 6.6413   | 0.1688  | 0.401595 |
| St6gal1    | chr16:23224739-23360350   | 55.2238  | 52.7135  | -0.0671 | 0.439361 |
| Cdk17      | chr10:93160875-93241342   | 84.9724  | 91.1391  | 0.1011  | 0.347330 |
| Art2b      | chr7:101578859-101581161  | 57.0279  | 52.2623  | -0.1259 | 0.529028 |
| Dnm2       | chr9:21424907-21507759    | 52.3963  | 49.1684  | -0.0917 | 0.626394 |
| Tes        | chr6:17065148-17105828    | 60.5053  | 65.4168  | 0.1126  | 0.425449 |
| Polg       | chr7:79448790-79466362    | 29.1650  | 27.5749  | -0.0809 | 0.561319 |
| Pdpr       | chr8:111094629-111137074  | 15.7335  | 17.1886  | 0.1276  | 0.342985 |
| Dgcr8      | chr16:18253947-18289249   | 15.0000  | 14.1065  | -0.0886 | 0.477800 |
| Psm7       | chr2:180036372-180042433  | 46.8462  | 52.2475  | 0.1574  | 0.567120 |
| Mtfl1      | chr4:124802103-124849800  | 4.6828   | 4.2601   | -0.1365 | 0.550134 |
| Med11      | chr11:70451918-70453727   | 31.6443  | 37.0110  | 0.2260  | 0.578947 |
| Gm22489    | chr1:161035849-161035911  | 144.6345 | 119.8061 | -0.2717 | 0.483067 |
| Ccnb2-ps   | chr8:71916555-71918851    | 2.9324   | 3.7577   | 0.3578  | 0.419467 |
| Nip7       | chr8:107056876-107060926  | 20.7744  | 18.8250  | -0.1422 | 0.620085 |
| Gm16200    | chr9:90221294-90221625    | 1.6396   | 3.0705   | 0.9051  | 0.237622 |
| Akap10     | chr11:61871306-61930252   | 12.7124  | 11.9418  | -0.0902 | 0.435334 |
| Atrip      | chr9:109057932-109074124  | 17.0341  | 18.7728  | 0.1402  | 0.478353 |
| Tmem70     | chr1:16665206-16678275    | 16.0005  | 14.5064  | -0.1414 | 0.388673 |
| Sptssa     | chr12:54645373-54656572   | 27.5212  | 31.1681  | 0.1795  | 0.475966 |
| Etv6       | chr6:134035699-134270158  | 8.2220   | 9.1878   | 0.1602  | 0.475977 |
| Ppp1r12b   | chr1:134754657-134955942  | 2.5499   | 2.3190   | -0.1370 | 0.413527 |
| Uck1       | chr2:32255001-32260159    | 9.9860   | 8.8363   | -0.1765 | 0.537333 |
| Zbtb40     | chr4:136979731-137048801  | 4.7379   | 4.3409   | -0.1263 | 0.539478 |
| Sptlc2     | chr12:87305057-87388355   | 15.1552  | 16.3874  | 0.1128  | 0.325296 |
| Mxd3       | chr13:55325167-55329758   | 15.3343  | 17.3883  | 0.1814  | 0.492679 |
| Ankrd49    | chr9:14780208-14782964    | 18.0921  | 20.8488  | 0.2046  | 0.526500 |
| Gm16574    | chr17:12818792-12819537   | 1.4401   | 0.8061   | -0.8370 | 0.370387 |
| Slc31a1    | chr4:62360726-62391769    | 3.5622   | 3.1297   | -0.1868 | 0.348114 |
| Oxld1      | chr11:120456605-120458068 | 4.6190   | 6.1325   | 0.4089  | 0.394507 |
| Gm15342    | chr16:96036089-96038743   | 4.3605   | 5.5093   | 0.3374  | 0.551691 |
| Cntn1      | chr15:92051164-92341967   | 0.0635   | 0.1436   | 1.1774  | 0.478717 |
| Tomm5      | chr4:45105207-45108114    | 14.9811  | 12.4334  | -0.2689 | 0.558042 |
| Snord100   | chr10:23785749-23785823   | 46.2691  | 61.5344  | 0.4113  | 0.509193 |
| Illdr1     | chr16:36693977-36726804   | 2.0592   | 2.4692   | 0.2620  | 0.341031 |
| Atad1      | chr19:32672562-32712298   | 49.4943  | 54.6767  | 0.1437  | 0.535664 |
| Gm23119    | chr18:74778560-74778700   | 60.1424  | 50.0701  | -0.2644 | 0.319555 |
| E2f1       | chr2:154559406-154569892  | 1.9440   | 2.4377   | 0.3265  | 0.340847 |
| Gm3235     | chr8:91621447-91629729    | 1.2978   | 0.6006   | -1.1115 | 0.354401 |
| Trmu       | chr15:85879311-85897394   | 6.7457   | 6.0441   | -0.1584 | 0.490687 |
| Ppp2r5d    | chr17:46682990-46705002   | 39.2321  | 36.9160  | -0.0878 | 0.523413 |
| Atxn7l1os2 | chr12:33358242-33394760   | 3.4724   | 2.8371   | -0.2915 | 0.429320 |
| Gm26508    | chr11:119077572-119081865 | 18.3729  | 16.2682  | -0.1755 | 0.579062 |
| Wbscr16    | chr5:134148053-134176774  | 5.9581   | 5.2087   | -0.1939 | 0.475424 |
| Dennd6a    | chr14:26579577-26633394   | 14.6116  | 13.4958  | -0.1146 | 0.603828 |
| Adcy9      | chr16:4287528-4420498     | 0.8575   | 0.6695   | -0.3571 | 0.364439 |
| Hsf2       | chr10:57486384-57513133   | 7.4348   | 8.8411   | 0.2499  | 0.616899 |
| Gm12185    | chr11:48904655-48992226   | 5.0376   | 4.4353   | -0.1837 | 0.598345 |
| Gpr179     | chr11:97332108-97352077   | 0.3116   | 0.2180   | -0.5151 | 0.531472 |
| Hap1       | chr11:100347326-100356128 | 0.8830   | 0.6585   | -0.4233 | 0.376444 |
| Cenpo      | chr12:4196003-4234294     | 6.5236   | 7.2810   | 0.1585  | 0.468229 |
| Pigh       | chr12:79080672-79089670   | 11.7876  | 13.7426  | 0.2214  | 0.554608 |
| Brf1       | chr12:112959861-113000621 | 29.8691  | 27.7644  | -0.1054 | 0.570418 |
| Myliip     | chr13:45389741-45412019   | 16.2468  | 17.9756  | 0.1459  | 0.375541 |
| Mapre3     | chr5:30814640-30866106    | 0.8978   | 1.2134   | 0.4346  | 0.426340 |
| Haus3      | chr5:34153920-34169445    | 38.0678  | 41.9337  | 0.1395  | 0.477257 |
| NA         | chr5:105824510-105832434  | 0.5672   | 0.3610   | -0.6518 | 0.380900 |
| Gm13856    | chr6:34151928-34174235    | 2.6161   | 1.9022   | -0.4598 | 0.525968 |
| Gimap8     | chr6:48647233-48660875    | 220.9121 | 212.0636 | -0.0590 | 0.459251 |
| Nfu1       | chr6:87009235-87028461    | 10.2482  | 11.8483  | 0.2093  | 0.466068 |
| Bcat1      | chr6:144993834-145076184  | 4.1388   | 3.5917   | -0.2046 | 0.647998 |
| Abhd2      | chr7:79273200-79365508    | 27.7759  | 26.6434  | -0.0601 | 0.324298 |
| Rps15a     | chr7:118104377-118116186  | 39.4281  | 46.7717  | 0.2464  | 0.488759 |
| R74862     | chr7:143021783-143053686  | 2.6755   | 3.1881   | 0.2529  | 0.373384 |



|               |                           |          |          |         |          |
|---------------|---------------------------|----------|----------|---------|----------|
| Zfp558        | chr9:18455574-18478268    | 1.4451   | 1.1233   | -0.3634 | 0.461815 |
| Alg9          | chr9:50775018-50843542    | 6.3997   | 7.1762   | 0.1652  | 0.199885 |
| Atp1b3        | chr9:96332679-96364299    | 206.2548 | 196.4905 | -0.0700 | 0.550413 |
| Nmnat3        | chr9:98287434-98420527    | 2.0379   | 2.4343   | 0.2564  | 0.424700 |
| Wdr82         | chr9:106170928-106191706  | 81.0596  | 77.1577  | -0.0712 | 0.517018 |
| Rpl36a        | chrX:134585653-134588062  | 7.4002   | 6.1159   | -0.2750 | 0.595695 |
| Gprasp1       | chrX:135742732-135803474  | 11.0470  | 10.3353  | -0.0961 | 0.513844 |
| Ly6d          | chr15:74762055-74763567   | 3.0367   | 1.7337   | -0.8086 | 0.571971 |
| Tuba1a        | chr15:98949840-98953551   | 20.4542  | 23.3199  | 0.1892  | 0.509587 |
| Tinf2         | chr14:55679082-55681817   | 23.8626  | 27.4196  | 0.2005  | 0.535896 |
| Gm16549       | chr14:72589751-72603367   | 3.2993   | 4.8372   | 0.5520  | 0.448679 |
| 4930506C21Rik | chr17:8293365-8311080     | 1.7670   | 1.3255   | -0.4147 | 0.322384 |
| Dhx16         | chr17:35879818-35892670   | 36.1746  | 34.0406  | -0.0877 | 0.579006 |
| Gm15538       | chr16:3926427-3926740     | 6.2433   | 3.3620   | -0.8930 | 0.602466 |
| Gm24616       | chr16:23111616-23111755   | 100.8729 | 85.9884  | -0.2303 | 0.525894 |
| Ighmbp2       | chr19:3260923-3283017     | 7.5785   | 6.9227   | -0.1306 | 0.334722 |
| Ptar1         | chr19:23687399-23721129   | 13.2660  | 14.8948  | 0.1671  | 0.264648 |
| Rnf152        | chr1:105276916-105356710  | 0.1415   | 0.0678   | -1.0613 | 0.536371 |
| Cenpl         | chr1:161070766-161086724  | 2.4727   | 3.0333   | 0.2948  | 0.504993 |
| Mbd1          | chr18:74268271-74282685   | 27.9015  | 30.5546  | 0.1310  | 0.398400 |
| Mettl15       | chr2:109092296-109280748  | 1.6706   | 3.1667   | 0.9226  | 0.191547 |
| Gm26003       | chr2:158358359-158358472  | 9.5497   | 5.7449   | -0.7332 | 0.211487 |
| B430305J03Rik | chr3:61362249-61365951    | 6.6394   | 5.8632   | -0.1794 | 0.537113 |
| Pdcd10        | chr3:75516489-75556856    | 10.2243  | 11.9010  | 0.2191  | 0.564881 |
| 6330416G13Rik | chr4:63558780-63586357    | 9.7766   | 8.7683   | -0.1570 | 0.599921 |
| Rnf220        | chr4:117271462-117497052  | 12.6820  | 11.7651  | -0.1083 | 0.596287 |
| Zswim7        | chr11:62267223-62281375   | 4.4977   | 6.4075   | 0.5106  | 0.458916 |
| Tspan9        | chr6:127961395-128143594  | 0.2214   | 0.3761   | 0.7646  | 0.334783 |
| Proscos       | chr8:27042376-27043042    | 0.5451   | 1.2148   | 1.1560  | 0.304704 |
| Tmem163       | chr1:127486545-127678096  | 0.5995   | 0.9471   | 0.6597  | 0.270954 |
| Gm371         | chrX:94997438-94998683    | 0.6767   | 0.3043   | -1.1530 | 0.489668 |
| Prf1          | chr10:61297835-61304263   | 2.3179   | 2.9330   | 0.3396  | 0.349742 |
| Tlr13         | chrX:106143203-106160493  | 0.2531   | 0.1183   | -1.0969 | 0.459874 |
| Timm23        | chr14:32180161-32201898   | 5.2076   | 6.2904   | 0.2725  | 0.424363 |
| Nln           | chr13:104023438-104109614 | 5.9881   | 5.3636   | -0.1589 | 0.462135 |
| Ccdc102a      | chr8:94902868-94918098    | 1.2533   | 0.8825   | -0.5060 | 0.491589 |
| Rps4x         | chrX:102184940-102189394  | 103.2630 | 124.1115 | 0.2653  | 0.476887 |
| Rnf168        | chr16:32277458-32301434   | 15.0370  | 16.4459  | 0.1292  | 0.365091 |
| Cbr1          | chr16:93607836-93610505   | 16.0593  | 14.2789  | -0.1695 | 0.412358 |
| Ttpal         | chr2:163602313-163619013  | 25.1041  | 27.0812  | 0.1094  | 0.300573 |
| Fndc3b        | chr3:27416161-27710439    | 0.6042   | 0.4441   | -0.4444 | 0.597428 |
| Alkbh5        | chr11:605336380-60558512  | 17.0389  | 18.4414  | 0.1141  | 0.307342 |
| Tnip2         | chr5:34496086-34513997    | 11.7783  | 11.7783  | 0.1622  | 0.378083 |
| Rtel1         | chr2:181319738-181356616  | 17.2667  | 16.2723  | -0.0856 | 0.503299 |
| Map3k9        | chr12:81714949-81781170   | 0.1819   | 0.2663   | 0.5497  | 0.386458 |
| Slc35a3       | chr3:116669468-116712831  | 8.5960   | 8.0741   | -0.0904 | 0.398598 |
| Nt5dc3        | chr10:86779004-86838389   | 4.9128   | 4.3546   | -0.1740 | 0.599013 |
| Lias          | chr5:65391496-65410693    | 7.3502   | 6.7525   | -0.1224 | 0.314078 |
| Got2          | chr8:95864133-95888547    | 18.2442  | 20.2051  | 0.1473  | 0.418880 |
| Tma7          | chr9:109077987-109082381  | 20.9591  | 24.5806  | 0.2299  | 0.396828 |
| Hmox2         | chr16:4726360-4766742     | 29.0041  | 32.0124  | 0.1424  | 0.437317 |
| Ttc9c         | chr19:8809074-8819333     | 20.3000  | 19.0952  | -0.0883 | 0.298658 |
| 2310058D17Rik | chr11:58965747-58978050   | 3.1172   | 3.7241   | 0.2567  | 0.445480 |
| 2810029C07Rik | chr12:111572320-111574402 | 1.3290   | 0.9690   | -0.4559 | 0.226405 |
| Ift88         | chr14:57424061-57517936   | 1.8236   | 1.5427   | -0.2414 | 0.228572 |
| Cnnm4         | chr1:36471619-36508764    | 3.6475   | 4.1965   | 0.2023  | 0.354540 |
| Arl5c         | chr11:97989577-97996181   | 51.3286  | 48.6254  | -0.0781 | 0.363490 |
| Lgals8        | chr13:12439414-12464944   | 28.5570  | 26.7225  | -0.0958 | 0.571540 |
| Zfp239        | chr6:117862099-117873291  | 1.1885   | 1.4952   | 0.3312  | 0.316156 |
| Gm25447       | chr17:31059603-31059731   | 10.9546  | 5.5903   | -0.9705 | 0.404812 |
| Gm16618       | chr16:20511132-20517766   | 2.8435   | 2.0653   | -0.4613 | 0.323226 |
| Rcor2         | chr19:7267324-7275225     | 0.6500   | 0.4243   | -0.6154 | 0.476818 |
| Slc25a5       | chrX:36795650-36798807    | 72.8222  | 80.5225  | 0.1450  | 0.558584 |
| Gm26896       | chr10:81606367-81609791   | 2.9705   | 3.6031   | 0.2786  | 0.298478 |
| Ezh1          | chr11:101191114-101226463 | 16.6769  | 15.5816  | -0.0980 | 0.618087 |
| 1110007C09Rik | chr13:49202950-49216026   | 13.6812  | 16.8893  | 0.3039  | 0.589375 |
| Skap2         | chr6:51859165-52012549    | 7.9283   | 9.2548   | 0.2232  | 0.331850 |
| Tmc3          | chr7:83584926-83625614    | 2.2427   | 2.0099   | -0.1581 | 0.314488 |
| Maged1        | chrX:94535473-94542143    | 0.8076   | 1.0832   | 0.4236  | 0.505075 |
| Gm10863       | chr15:79166040-79227524   | 4.6933   | 5.8045   | 0.3066  | 0.479404 |
| Slc41a1       | chr1:131827492-131848865  | 20.8516  | 19.3819  | -0.1055 | 0.599944 |

|               |                           |          |          |         |          |
|---------------|---------------------------|----------|----------|---------|----------|
| E130215H24Rik | chr2:150667493-150668935  | 6.3907   | 5.0330   | -0.3445 | 0.481428 |
| Fgf2          | chr3:37312518-37405377    | 2.3097   | 3.2890   | 0.5100  | 0.450178 |
| Gm20634       | chr3:96245553-96248509    | 0.7760   | 1.0817   | 0.4793  | 0.439002 |
| Terc          | chr3:96414436-96414859    | 49.2491  | 57.6282  | 0.2267  | 0.519000 |
| Gm10532       | chr18:75514644-75522806   | 0.1537   | 0.3136   | 1.0287  | 0.184469 |
| Katna1        | chr10:7725999-7763150     | 32.5185  | 35.6511  | 0.1327  | 0.413925 |
| Tspyl4        | chr10:34297420-34301308   | 12.7737  | 14.0869  | 0.1412  | 0.386787 |
| Ube2g2        | chr10:77622274-77645993   | 14.4149  | 16.3312  | 0.1801  | 0.498443 |
| Zfp692        | chr11:58307068-58314627   | 19.0408  | 17.5251  | -0.1197 | 0.343565 |
| Ctc1          | chr11:69015910-69036473   | 4.7042   | 4.2108   | -0.1598 | 0.583834 |
| Gm11583       | chr11:97160989-97161675   | 55.3615  | 49.8507  | -0.1513 | 0.385316 |
| Tmem101       | chr11:102152545-102156404 | 5.9061   | 7.0654   | 0.2586  | 0.474955 |
| Prkar1a       | chr11:109649404-109669656 | 66.3940  | 71.4111  | 0.1051  | 0.452533 |
| Slc9a3r1      | chr11:115163340-115181181 | 82.8502  | 89.4212  | 0.1101  | 0.432545 |
| Rptor         | chr11:119602904-119899576 | 4.6852   | 4.3710   | -0.1002 | 0.457867 |
| Brms1l        | chr12:55836365-55869735   | 12.5475  | 11.5069  | -0.1249 | 0.329760 |
| Ift172        | chr5:31253279-31291114    | 3.4891   | 3.0693   | -0.1849 | 0.482953 |
| Mir25         | chr5:138165320-138165404  | 6.7815   | 12.2405  | 0.8520  | 0.215164 |
| Pan3          | chr5:147430160-147548502  | 32.4155  | 31.1022  | -0.0597 | 0.228626 |
| Ssbp1         | chr6:40471351-40481823    | 8.4950   | 7.6748   | -0.1465 | 0.405183 |
| Zfp467        | chr6:48427696-48445825    | 3.4050   | 3.9758   | 0.2236  | 0.415454 |
| Rnf103        | chr6:71493893-71525020    | 7.9136   | 8.7867   | 0.1510  | 0.314744 |
| Kbtbd8        | chr6:95117239-95129718    | 5.6204   | 4.9406   | -0.1860 | 0.587853 |
| Cdkn1b        | chr6:134920400-134925513  | 63.1376  | 67.1390  | 0.0887  | 0.122055 |
| Gpr4          | chr7:19212537-19224176    | 1.0117   | 1.3325   | 0.3974  | 0.220018 |
| G630030J09Rik | chr7:31149527-31152707    | 3.9558   | 3.3110   | -0.2567 | 0.426267 |
| Rps11         | chr7:45122387-45124389    | 663.5979 | 728.6330 | 0.1349  | 0.598354 |
| Lamp1         | chr8:13159134-13175338    | 76.4814  | 72.6012  | -0.0751 | 0.507596 |
| Gm17491       | chr8:22480290-22483330    | 13.0858  | 11.7286  | -0.1580 | 0.569215 |
| Prosc         | chr8:27042554-27056131    | 11.5451  | 10.7575  | -0.1019 | 0.392210 |
| Gm25813       | chr8:52336914-52337105    | 3.6220   | 5.9542   | 0.7171  | 0.416872 |
| Zfp930        | chr8:69226342-69228980    | 19.6676  | 17.4874  | -0.1695 | 0.569446 |
| Gipc1         | chr8:83652677-83664788    | 17.6086  | 20.4889  | 0.2186  | 0.592749 |
| Gm16124       | chr9:53667245-53681265    | 4.7171   | 7.3262   | 0.6352  | 0.432404 |
| Gorasp1       | chr9:119925672-119937558  | 7.4745   | 6.7038   | -0.1570 | 0.542173 |
| Ccdc22        | chrX:7593808-7605517      | 12.7145  | 11.7867  | -0.1093 | 0.322981 |
| Pqbp1         | chrX:7894518-7899269      | 42.6511  | 47.1621  | 0.1450  | 0.487420 |
| Upf3b         | chrX:37091677-37110322    | 12.3445  | 13.7412  | 0.1546  | 0.457308 |
| Dlg3          | chrX:100767721-100818410  | 4.9121   | 4.4412   | -0.1454 | 0.475700 |
| Wnk3          | chrX:151198139-151320152  | 0.4379   | 0.3317   | -0.4006 | 0.502320 |
| Siah1b        | chrX:164070704-164076493  | 2.0827   | 2.6642   | 0.3553  | 0.346938 |
| Lrp12         | chr15:39870602-39943994   | 1.2362   | 1.5832   | 0.3569  | 0.477813 |
| Arhgap39      | chr15:76723984-76818170   | 3.9061   | 3.4149   | -0.1939 | 0.641431 |
| CommD5        | chr15:76899909-76901305   | 10.0537  | 12.7659  | 0.3446  | 0.576927 |
| Pacsin2       | chr15:83375606-83464606   | 11.7066  | 12.9178  | 0.1420  | 0.365925 |
| Csrnp2        | chr15:100479569-100495239 | 3.7385   | 3.2355   | -0.2085 | 0.538917 |
| NA            | chr17:21966174-21968272   | 3.9772   | 3.1729   | -0.3259 | 0.603068 |
| Arhgdig       | chr17:26196225-26207786   | 0.5382   | 0.3306   | -0.7030 | 0.260375 |
| Tbc1d22bos    | chr17:29578815-29596305   | 1.9235   | 2.6369   | 0.4551  | 0.537549 |
| H2-Q6         | chr17:35424849-35430055   | 130.6979 | 141.4184 | 0.1137  | 0.494664 |
| Enpp5         | chr17:44078812-44086567   | 3.3873   | 3.9213   | 0.2112  | 0.436010 |
| Ccdc94        | chr17:55959186-55967949   | 12.5364  | 14.3219  | 0.1921  | 0.243091 |
| Yars2         | chr16:16302964-16309640   | 9.3640   | 7.8707   | -0.2506 | 0.658040 |
| Ganab         | chr19:8898089-8916663     | 53.2771  | 50.8379  | -0.0676 | 0.490660 |
| Incenp        | chr19:9872296-9899533     | 20.8733  | 23.2371  | 0.1548  | 0.532802 |
| 1110059E24Rik | chr19:21581201-21652976   | 7.2716   | 8.4969   | 0.2247  | 0.492476 |
| Fbxl15        | chr19:46328183-46330446   | 3.9820   | 4.9862   | 0.3244  | 0.374817 |
| Dnpep         | chr1:75307895-75317637    | 14.2100  | 15.8390  | 0.1566  | 0.392255 |
| Mdm4          | chr1:132989844-133025366  | 43.1116  | 40.1592  | -0.1023 | 0.627745 |
| Epc1          | chr18:6435950-6516108     | 30.1373  | 32.4595  | 0.1071  | 0.323617 |
| Gm26538       | chr18:34796894-34803484   | 3.6162   | 3.1573   | -0.1958 | 0.338781 |
| Gnpda1        | chr18:38327557-38339003   | 10.3559  | 9.3094   | -0.1537 | 0.455680 |
| Cd226         | chr18:89197430-89270201   | 49.1000  | 53.9158  | 0.1350  | 0.549787 |
| Celf2         | chr2:6539693-7509563      | 12.8819  | 12.2051  | -0.0779 | 0.617012 |
| Ssfa2         | chr2:79635351-79672966    | 6.6783   | 5.9661   | -0.1627 | 0.608177 |
| Ddb2          | chr2:91211571-91236982    | 42.1956  | 39.9303  | -0.0796 | 0.431276 |
| Cdan1         | chr2:120716153-120850128  | 5.8563   | 6.4321   | 0.1353  | 0.412245 |
| Pcif1         | chr2:164879303-164894454  | 25.5717  | 24.1264  | -0.0839 | 0.572963 |
| Nmd3          | chr3:69721984-69749042    | 19.4582  | 17.9229  | -0.1186 | 0.520518 |
| 4930579G24Rik | chr3:79629078-79632817    | 4.2026   | 4.9612   | 0.2394  | 0.022747 |
| Fhdc1         | chr3:84444034-84480429    | 3.7710   | 4.4051   | 0.2242  | 0.479741 |

|               |                          |          |          |         |          |
|---------------|--------------------------|----------|----------|---------|----------|
| Celsr2        | chr3:108390850-108415552 | 0.2475   | 0.3235   | 0.3868  | 0.197893 |
| Dbt           | chr3:116513069-116549976 | 6.9873   | 8.1731   | 0.2261  | 0.491951 |
| Smc2          | chr4:52439242-52488260   | 30.0550  | 33.1109  | 0.1397  | 0.575884 |
| Dmap1         | chr4:117674680-117682273 | 14.6357  | 13.5649  | -0.1096 | 0.180001 |
| Eno1          | chr4:150236720-150248879 | 13.7548  | 15.1291  | 0.1374  | 0.488212 |
| NA            | chr12:69361184-69361481  | 1.4380   | 3.0655   | 1.0921  | 0.329488 |
| Calr3         | chr8:72424175-72443870   | 0.5056   | 0.2456   | -1.0416 | 0.444368 |
| Glra4         | chrX:136757673-136780141 | 0.7635   | 0.4260   | -0.8418 | 0.504156 |
| Ankrd33b      | chr15:31291478-31367759  | 0.1088   | 0.0516   | -1.0756 | 0.424607 |
| 5031414D18Rik | chr14:75016026-75052532  | 0.7511   | 0.4502   | -0.7385 | 0.482535 |
| Gm15971       | chr16:94620376-94620587  | 10.5250  | 5.8763   | -0.8408 | 0.471642 |
| Gm26685       | chr1:164503306-164514882 | 0.3375   | 0.6815   | 1.0137  | 0.391948 |
| Vash2         | chr1:190947647-190979296 | 0.4075   | 0.6570   | 0.6891  | 0.421386 |
| Ldlrad3       | chr2:101950202-102186385 | 0.0675   | 0.1431   | 1.0851  | 0.287984 |
| Camk2a        | chr18:60925617-60988152  | 0.0802   | 0.1620   | 1.0141  | 0.391470 |
| Gm15417       | chr3:89391849-89398779   | 1.4348   | 2.2024   | 0.6183  | 0.351510 |
| Slc25a18      | chr6:120773767-120793982 | 2.3971   | 1.4728   | -0.7027 | 0.643348 |
| Catsperg1     | chr7:29181320-29214035   | 0.1368   | 0.0637   | -1.1033 | 0.532924 |
| Traj35        | chr14:54183773-54183838  | 10.4787  | 20.6555  | 0.9791  | 0.371351 |
| Gm10309       | chr17:86497731-86505232  | 0.6795   | 0.3200   | -1.0865 | 0.582170 |
| Cd28          | chr1:60716799-60773359   | 78.3570  | 74.8882  | -0.0653 | 0.543270 |
| Gm16153       | chr10:4409032-4423369    | 1.8460   | 1.5347   | -0.2665 | 0.402735 |
| Cenpv         | chr11:62524945-62539261  | 3.1851   | 3.9460   | 0.3090  | 0.392413 |
| Ccdc127       | chr13:74350308-74365783  | 5.5145   | 6.1117   | 1.0483  | 0.451853 |
| Mecp2         | chrX:74026591-74135363   | 7.7447   | 8.5249   | 0.1385  | 0.495659 |
| Tsr2          | chrX:151087093-151096543 | 5.7588   | 6.6346   | 0.2043  | 0.485013 |
| Cpq           | chr15:33083128-33594552  | 3.6669   | 2.8292   | -0.3741 | 0.557682 |
| Usp54         | chr14:20548911-20618354  | 2.0169   | 2.3310   | 0.2088  | 0.445285 |
| Kremen2       | chr17:23741199-23745829  | 2.0336   | 2.6719   | 0.3938  | 0.403461 |
| Crim1         | chr17:78200247-78376592  | 8.9232   | 8.2496   | -0.1132 | 0.511420 |
| Mir3068       | chr12:87437681-87437817  | 12.6420  | 7.4735   | -0.7584 | 0.494180 |
| Rps6-ps1      | chr15:76337615-76338365  | 1.2335   | 0.7302   | -0.7563 | 0.257679 |
| Noa1          | chr5:77294181-77310084   | 6.3886   | 5.7783   | -0.1449 | 0.410613 |
| Fhl2          | chr1:43123073-43163961   | 2.9377   | 3.7233   | 0.3419  | 0.382911 |
| Stk11ip       | chr1:75521528-75537335   | 6.5945   | 5.9019   | -0.1601 | 0.636219 |
| Crk           | chr11:75679258-75706908  | 20.3876  | 21.9851  | 0.1088  | 0.199024 |
| Klc3          | chr7:19394436-19404104   | 9.9701   | 8.7783   | -0.1837 | 0.577858 |
| Gm12265       | chr11:60240809-60241930  | 6.0742   | 4.3342   | -0.4869 | 0.536248 |
| Neto2         | chr8:85636587-85690973   | 1.7846   | 1.3914   | -0.3590 | 0.661671 |
| Cox8a         | chr19:7215157-7217616    | 106.7753 | 122.3140 | 0.1960  | 0.600697 |
| Stxbp5        | chr10:9755546-9901079    | 8.3646   | 7.9150   | -0.0797 | 0.431749 |
| Gtf3c6        | chr10:40249202-40257665  | 16.3693  | 19.4678  | 0.2501  | 0.533621 |
| Chst3         | chr10:60181531-60219260  | 0.6480   | 0.4963   | -0.3848 | 0.495574 |
| Krt222        | chr11:99232760-99244085  | 1.4584   | 1.8077   | 0.3097  | 0.229669 |
| Scamp1        | chr13:94201309-94285857  | 0.6729   | 1.0294   | 0.6134  | 0.555860 |
| A430078I02Rik | chr6:86470804-86480830   | 1.2668   | 0.9219   | -0.4585 | 0.382713 |
| Rps9          | chr7:3703992-3706901     | 184.6586 | 204.1570 | 0.1448  | 0.613683 |
| Cxx1b         | chrX:53669177-53670408   | 3.8989   | 2.9262   | -0.4140 | 0.544527 |
| Traj21        | chr14:54198789-54198846  | 257.3631 | 225.3719 | -0.1915 | 0.429355 |
| Psme1         | chr14:55578122-55581529  | 129.9959 | 139.7443 | 0.1043  | 0.433092 |
| Tex30         | chr1:44086612-44102441   | 8.4292   | 9.9431   | 0.2383  | 0.465584 |
| Gm26287       | chr1:59704257-59704338   | 17.9883  | 8.6202   | -1.0613 | 0.392738 |
| Hey1          | chr3:8663361-8667039     | 0.7341   | 0.4247   | -0.7894 | 0.409934 |
| Dennd4c       | chr4:86748554-86850603   | 8.2415   | 8.9636   | 0.1212  | 0.264989 |
| AU040320      | chr4:126753543-126870070 | 12.8204  | 11.9270  | -0.1042 | 0.582779 |
| Med18         | chr4:132458730-132463921 | 8.3500   | 7.0804   | -0.2379 | 0.621963 |
| Gm15712       | chr16:43184572-43185728  | 1.0511   | 1.7811   | 0.7609  | 0.479518 |
| Mthfd2l       | chr5:90931195-91021360   | 0.6670   | 0.9913   | 0.5715  | 0.536757 |
| Rab10os       | chr12:3235503-3250377    | 12.9294  | 12.0848  | -0.0975 | 0.498368 |
| Dnajb6        | chr5:29735687-29786478   | 5.8305   | 5.3083   | -0.1354 | 0.506983 |
| Rfc5          | chr5:117378102-117389047 | 12.8597  | 11.9931  | -0.1007 | 0.446647 |
| Trbv14        | chr6:41135166-41135609   | 9.8636   | 12.7525  | 0.3706  | 0.257977 |
| Tceb1         | chr1:16642765-16656865   | 30.6848  | 34.9156  | 0.1864  | 0.504814 |
| Cul2          | chr18:3382987-3436377    | 13.7930  | 12.8216  | -0.1054 | 0.468785 |
| Rpa2          | chr4:132768331-132778752 | 18.6641  | 17.3142  | -0.1083 | 0.524490 |
| Gstm4         | chr3:108040407-108044894 | 1.0781   | 1.6342   | 0.6001  | 0.397511 |
| Rpsa          | chr9:120127765-120132369 | 17.7417  | 16.1346  | -0.1370 | 0.480897 |
| Loxl3         | chr6:83034172-83052562   | 2.5989   | 3.1225   | 0.2648  | 0.499098 |
| Spata5l1      | chr2:122630624-122632930 | 8.4118   | 7.2496   | -0.2145 | 0.483948 |
| Zc3h12d       | chr10:7832469-7870397    | 42.0217  | 45.4435  | 0.1129  | 0.476539 |
| Gm11970       | chr11:6446217-6446537    | 6.7380   | 4.7254   | -0.5119 | 0.313429 |

|               |                           |          |          |         |          |
|---------------|---------------------------|----------|----------|---------|----------|
| Mrpl12        | chr11:120484612-120489065 | 20.5889  | 18.2980  | -0.1702 | 0.586828 |
| Slc35d2       | chr13:64096309-64129330   | 10.3116  | 11.6779  | 0.1795  | 0.422335 |
| Nudt9         | chr5:104046305-104065379  | 16.2621  | 14.7900  | -0.1369 | 0.570014 |
| Idua          | chr5:108660330-108684557  | 5.0333   | 5.8615   | 0.2198  | 0.530538 |
| Rasgef1a      | chr6:118066384-118091546  | 3.9008   | 3.2454   | -0.2654 | 0.594211 |
| Sbsn          | chr7:30734738-30756134    | 0.7791   | 0.5001   | -0.6394 | 0.529643 |
| Dgat2         | chr7:99153662-99182713    | 1.9755   | 2.4622   | 0.3177  | 0.208577 |
| Ifitm10       | chr7:142325836-142373753  | 0.3747   | 0.2449   | -0.6134 | 0.367748 |
| NA            | chr7:143634805-143636585  | 2.3586   | 1.7853   | -0.4018 | 0.543067 |
| Nfatc3        | chr8:106059602-106130537  | 39.8509  | 38.0037  | -0.0685 | 0.533924 |
| Gm5617        | chr9:48495344-48495964    | 4.4628   | 5.9168   | 0.4069  | 0.387243 |
| Trcg1         | chr9:57236555-57249863    | 0.4621   | 0.7533   | 0.7049  | 0.425832 |
| Gm6206        | chrX:103162893-103165427  | 1.3707   | 1.9053   | 0.4750  | 0.527303 |
| Ncald         | chr15:37366174-37792570   | 0.1087   | 0.1906   | 0.8096  | 0.411320 |
| Oxr1          | chr15:41447481-41861048   | 23.0468  | 24.8535  | 0.1089  | 0.336770 |
| 9330154K18Rik | chr15:57717803-57738666   | 2.3697   | 1.9284   | -0.2973 | 0.599604 |
| Baiap2l2      | chr15:79258194-79285537   | 0.3321   | 0.1584   | -1.0680 | 0.474209 |
| Gpd1          | chr15:99717514-99725005   | 0.4619   | 0.2548   | -0.8583 | 0.575876 |
| H2-Q5         | chr17:35394125-35397800   | 40.7484  | 45.3652  | 0.1548  | 0.532004 |
| Camkmt        | chr17:85090725-85458139   | 3.5296   | 2.6882   | -0.3929 | 0.342139 |
| 1300002E11Rik | chr16:21794346-21809037   | 5.8741   | 5.0939   | -0.2056 | 0.627862 |
| Arl2          | chr19:6134373-6141406     | 2.9503   | 3.5336   | 0.2603  | 0.359015 |
| Fbn2          | chr18:58008622-58209926   | 0.2300   | 0.1237   | -0.8940 | 0.612982 |
| Mppe1         | chr18:67225529-67245830   | 37.6250  | 40.8648  | 0.1192  | 0.337287 |
| Zfp236        | chr18:82593592-82692883   | 16.5089  | 15.6535  | -0.0768 | 0.558677 |
| Inpp5e        | chr2:26396248-26409203    | 18.3293  | 17.1170  | -0.0987 | 0.539498 |
| Acvr2a        | chr2:48814108-48903269    | 4.7311   | 4.1050   | -0.2048 | 0.667695 |
| Gytl1b        | chr2:92365045-92374869    | 0.1153   | 0.2271   | 0.9783  | 0.473674 |
| Dnajc24       | chr2:105966708-106003549  | 9.2582   | 8.0111   | -0.2087 | 0.447506 |
| Serf2         | chr2:121449194-121458313  | 21.6423  | 20.3690  | -0.0875 | 0.536264 |
| Cct3          | chr3:88297115-88321767    | 65.2272  | 60.5123  | -0.1082 | 0.682965 |
| Kdm4a         | chr4:118136956-118180043  | 35.0528  | 32.9512  | -0.0892 | 0.631775 |
| Gm13091       | chr4:150566868-150568544  | 12.2584  | 9.6654   | -0.3429 | 0.515539 |
| Tac4          | chr11:95261528-95269265   | 1.3574   | 2.1603   | 0.6704  | 0.414686 |
| 2510016G02Rik | chr7:132889488-132931375  | 1.5569   | 0.9140   | -0.7684 | 0.553705 |
| Creb3l4       | chr3:90237499-90243512    | 0.5668   | 0.2740   | -1.0485 | 0.493669 |
| Rad9a         | chr19:4195197-4201603     | 50.4698  | 54.1478  | 0.1015  | 0.089940 |
| Gm16086       | chr12:107079359-107099673 | 2.5504   | 4.4625   | 0.8071  | 0.580841 |
| Cog5          | chr12:31654868-31937630   | 34.3333  | 37.2728  | 0.1185  | 0.384812 |
| Fam96a        | chr9:66126610-66138955    | 35.1070  | 39.7117  | 0.1778  | 0.561718 |
| Tnfai2        | chr3:95139520-95142360    | 79.5581  | 85.7983  | 0.1089  | 0.218308 |
| Sox15         | chr11:69655313-69656727   | 1.2658   | 0.7097   | -0.8346 | 0.454240 |
| 1600002K03Rik | chr10:80172943-80175146   | 11.7323  | 8.4527   | -0.4730 | 0.638735 |
| Rps26         | chr10:128624529-128626506 | 572.5020 | 678.7982 | 0.2457  | 0.486673 |
| Ncapg2        | chr12:116405401-116463531 | 12.1352  | 13.3654  | 0.1393  | 0.537726 |
| Dhx15         | chr5:52150208-52190519    | 160.4699 | 153.0227 | -0.0686 | 0.585946 |
| Tmed5         | chr5:108106365-108132620  | 14.9722  | 16.2169  | 0.1152  | 0.416481 |
| Zdhhc4        | chr5:143316488-143329256  | 12.3679  | 11.3887  | -0.1190 | 0.372148 |
| Lancl2        | chr6:57702600-57739438    | 5.0521   | 5.9836   | 0.2441  | 0.485418 |
| Kdm3a         | chr6:71588973-71632905    | 30.0363  | 28.5857  | -0.0714 | 0.437003 |
| Exoc6b        | chr6:84618486-85069513    | 3.4295   | 3.8183   | 0.1549  | 0.405236 |
| Bola2         | chr7:126695400-126697058  | 24.6058  | 27.8526  | 0.1788  | 0.543504 |
| Slc25a14      | chrX:48623412-48662294    | 4.2455   | 3.5490   | -0.2585 | 0.524735 |
| Traj37        | chr14:54181517-54181577   | 124.0931 | 102.6777 | -0.2733 | 0.406493 |
| Dynlt1f       | chr17:6648940-6655939     | 3.1422   | 4.5847   | 0.5450  | 0.527089 |
| Plcx2         | chr16:45959262-46010218   | 15.3174  | 14.3789  | -0.0912 | 0.572593 |
| Rnf125        | chr18:20944624-20983848   | 26.6717  | 29.4526  | 0.1431  | 0.259466 |
| P2rx3         | chr2:84998582-85037462    | 0.8761   | 1.1603   | 0.4055  | 0.177448 |
| Hyi           | chr4:118359989-118362744  | 9.1951   | 8.1530   | -0.1735 | 0.508045 |
| Snip1         | chr4:125066671-125074042  | 26.0554  | 24.3927  | -0.0951 | 0.455758 |
| Hist1h4n      | chr13:21831766-21832196   | 1.2912   | 2.9251   | 1.1798  | 0.588575 |
| Gm15494       | chr7:4446445-4471285      | 2.4050   | 1.2002   | -1.0028 | 0.410868 |
| Nron          | chr2:33805815-33813591    | 0.2865   | 0.1418   | -0.1046 | 0.575501 |
| Arl1          | chr10:88730857-88744094   | 19.4040  | 17.8560  | -0.1199 | 0.547171 |
| Gm12734       | chr11:77542132-77543080   | 3.0538   | 2.2656   | -0.4307 | 0.300464 |
| Enthd2        | chr11:120090530-120098731 | 10.5753  | 9.5665   | -0.1446 | 0.593487 |
| Pole2         | chr12:69201778-69228190   | 14.3966  | 12.9130  | -0.1569 | 0.543936 |
| Net1          | chr13:3882564-3918220     | 9.0339   | 8.2756   | -0.1265 | 0.459689 |
| Cdk20         | chr13:64432552-64439720   | 1.6602   | 1.2397   | -0.4214 | 0.355668 |
| Zfp551        | chr7:12415152-12422751    | 4.3084   | 5.0772   | 0.2369  | 0.444928 |
| Ubn1          | chr16:5050067-5086285     | 28.9566  | 31.0333  | 0.0999  | 0.334376 |

|               |                           |          |          |         |          |
|---------------|---------------------------|----------|----------|---------|----------|
| Psm2          | chr16:20651651-20663414   | 50.8810  | 48.5042  | -0.0690 | 0.501927 |
| Frat2         | chr19:41845977-41848132   | 4.2544   | 5.2392   | 0.3004  | 0.534284 |
| Gigyf2        | chr1:87326997-87450796    | 12.3980  | 11.7889  | -0.0727 | 0.441496 |
| Zgrf1         | chr3:127553488-127618021  | 5.3008   | 4.8507   | -0.1280 | 0.517485 |
| Lrrc48        | chr11:60353328-60394341   | 0.2041   | 0.0985   | -1.0511 | 0.411346 |
| Prr7          | chr13:55464266-55473155   | 5.3855   | 4.2770   | -0.3325 | 0.541097 |
| Alms1         | chr6:85587530-85702753    | 3.5749   | 3.9549   | 0.1457  | 0.310090 |
| Gm17055       | chr6:108656916-108659417  | 0.4826   | 0.7905   | 0.7119  | 0.592609 |
| Dhx30         | chr9:110084319-110117830  | 14.4531  | 13.8076  | -0.0659 | 0.291092 |
| Angpt1        | chr1:156838561-156861078  | 0.9960   | 0.6995   | -0.5098 | 0.509869 |
| BC029214      | chr2:25455140-25461094    | 13.8760  | 15.6180  | 0.1706  | 0.425390 |
| Fxr1          | chr3:34020078-34069342    | 48.8575  | 53.2245  | 0.1235  | 0.474712 |
| Fbxo47        | chr11:97853825-97884154   | 0.4074   | 0.7585   | 0.8968  | 0.383259 |
| Lct           | chr1:128284755-128328318  | 0.0534   | 0.1275   | 1.2546  | 0.341720 |
| Gm11626       | chr11:101456575-101457390 | 53.6532  | 45.9622  | -0.2232 | 0.587907 |
| Gm12529       | chr4:59532746-59533014    | 10.8167  | 8.0518   | -0.4259 | 0.402859 |
| Ccdc28a       | chr10:18213675-18234998   | 8.3478   | 7.5302   | -0.1487 | 0.447867 |
| Zbbp          | chr11:11279625-11462408   | 0.9982   | 1.2513   | 0.3260  | 0.289454 |
| Med7          | chr11:46436924-46442721   | 10.4761  | 11.8260  | 0.1749  | 0.413928 |
| Gm15892       | chr11:88059065-88067476   | 0.5837   | 0.2939   | -0.9898 | 0.364528 |
| Agbl5         | chr5:30888693-30906965    | 9.3785   | 10.1382  | 0.1124  | 0.093771 |
| Brsk2         | chr7:141949750-142004247  | 0.5933   | 0.4525   | -0.3907 | 0.381746 |
| Uba5          | chr9:104046598-104063134  | 19.9849  | 18.4291  | -0.1169 | 0.552742 |
| Ccr9          | chr9:123678438-123783457  | 5.4285   | 4.8425   | -0.1648 | 0.542918 |
| Trav9-4       | chr14:53676140-53676629   | 3.3829   | 5.4439   | 0.6864  | 0.438725 |
| Rhot2         | chr17:25838456-25844851   | 18.9699  | 17.9524  | -0.0795 | 0.342121 |
| Pcmdt1        | chr1:7088919-7173628      | 18.9703  | 17.7834  | -0.0932 | 0.591305 |
| Cp            | chr3:19957053-20009145    | 0.7217   | 0.5709   | -0.3382 | 0.565207 |
| Aaas          | chr15:102338246-102350759 | 21.2720  | 23.6374  | 0.1521  | 0.381947 |
| Alpk1         | chr3:127670398-127780527  | 0.6449   | 0.5043   | -0.3548 | 0.412708 |
| Samd14        | chr11:95009878-95026087   | 0.5469   | 0.3288   | -0.7341 | 0.549012 |
| Gm12058       | chr11:22786810-22787247   | 0.9791   | 2.0510   | 1.0668  | 0.327868 |
| Gm16585       | chr1:177786855-177787465  | 2.7700   | 1.7387   | -0.6719 | 0.512847 |
| Cse1l         | chr2:166906039-166946389  | 24.1266  | 26.0671  | 0.1116  | 0.413677 |
| Gm12141       | chr11:41498736-41500901   | 1.3334   | 0.8964   | -0.5730 | 0.518024 |
| Fam103a1      | chr7:81762924-81769491    | 1.6677   | 2.4948   | 0.5811  | 0.404527 |
| 1700052N19Rik | chr10:4432466-4455141     | 4.2110   | 4.7368   | 0.1698  | 0.500984 |
| Perp          | chr10:18845070-18857073   | 0.8131   | 1.2354   | 0.6034  | 0.483055 |
| Traf3ip2      | chr10:39612933-39655307   | 13.3114  | 14.7047  | 0.1436  | 0.456948 |
| Lace1         | chr10:42312584-42478565   | 2.9426   | 3.5068   | 0.2531  | 0.316963 |
| Gcc2          | chr10:58255496-58305599   | 10.9752  | 10.3719  | -0.0816 | 0.564030 |
| Sept10        | chr10:59164112-59221847   | 0.6281   | 0.9778   | 0.6385  | 0.376934 |
| Ddit4         | chr10:59949674-59951770   | 45.1030  | 41.7436  | -0.1117 | 0.629935 |
| Jmjd1c        | chr10:67096124-67256326   | 19.2845  | 20.6065  | 0.0957  | 0.356709 |
| Arid5b        | chr10:68095592-68278726   | 11.9781  | 13.2713  | 0.1479  | 0.505784 |
| Ube2d1        | chr10:71254979-71285262   | 4.0054   | 3.6009   | -0.1536 | 0.395049 |
| Cabin1        | chr10:75646109-75764357   | 17.9231  | 16.7356  | -0.0989 | 0.673828 |
| Cdc34         | chr10:79682194-79688394   | 40.9509  | 37.9162  | -0.1111 | 0.563588 |
| Polr2e        | chr10:80035948-80039795   | 22.5934  | 21.0875  | -0.0995 | 0.528273 |
| Rps15         | chr10:80292452-80294114   | 650.0104 | 711.0496 | 0.1295  | 0.607959 |
| Mfsd12        | chr10:81357490-81366225   | 4.5853   | 4.0804   | -0.1683 | 0.555517 |
| Gna11         | chr10:81528723-81545190   | 5.9432   | 6.5861   | 0.1482  | 0.152600 |
| Vezt          | chr10:93939164-94035817   | 2.3749   | 2.1918   | -0.1158 | 0.623301 |
| Mrpl42        | chr10:95480805-95501927   | 38.0940  | 44.5829  | 0.2269  | 0.594238 |
| Nudt4         | chr10:95547006-95564167   | 18.8227  | 20.5638  | 0.1276  | 0.419157 |
| 4930430F08Rik | chr10:100572273-100589259 | 3.0176   | 3.7108   | 0.2983  | 0.568284 |
| Gns           | chr10:121365089-121397245 | 12.8304  | 11.9244  | -0.1057 | 0.454885 |
| Mon2          | chr10:122992060-123076505 | 17.5779  | 18.7799  | 0.0954  | 0.369554 |
| Ctdsp2        | chr10:12697816-126999975  | 18.7380  | 17.4489  | -0.1028 | 0.669681 |
| Naca          | chr10:128035345-128048637 | 9.9640   | 11.0521  | 0.1495  | 0.607599 |
| Atp5b         | chr10:128083272-128090391 | 217.6273 | 208.7711 | -0.0599 | 0.650363 |
| Vmn2r84       | chr10:130385315-130394241 | 1.7086   | 1.3081   | -0.3853 | 0.617738 |
| Tug1          | chr11:3639784-3649673     | 38.8211  | 41.6167  | 0.1003  | 0.449076 |
| Ccdc157       | chr11:4141122-4160293     | 3.7549   | 3.3710   | -0.1556 | 0.547187 |
| Osm           | chr11:4236419-4241026     | 10.2952  | 11.6153  | 0.1741  | 0.399258 |
| Ppp3r1        | chr11:17159262-17200375   | 24.7828  | 26.7899  | 0.1123  | 0.375680 |
| Aftph         | chr11:20685083-20741589   | 32.3807  | 34.5999  | 0.0956  | 0.357065 |
| Gm12039       | chr11:21280044-21280224   | 7.0713   | 4.3650   | -0.6960 | 0.424675 |
| Papolg        | chr11:23862645-23895253   | 18.5202  | 20.1076  | 0.1186  | 0.436083 |
| Olfr56        | chr11:48978888-49135387   | 1.2779   | 1.7499   | 0.4534  | 0.542523 |
| Fnip1         | chr11:54438198-54518235   | 13.3948  | 12.6151  | -0.0865 | 0.575702 |

|               |                           |          |          |         |          |
|---------------|---------------------------|----------|----------|---------|----------|
| G3bp1         | chr11:55469684-55504838   | 44.4825  | 42.3052  | -0.0724 | 0.636709 |
| Mfap3         | chr11:57518663-57533815   | 16.7129  | 15.7631  | -0.0844 | 0.539818 |
| 1700047K16Rik | chr11:58322987-58324439   | 6.1573   | 5.1122   | -0.2684 | 0.391935 |
| NA            | chr11:58327720-58330339   | 9.4470   | 10.5848  | 0.1641  | 0.481968 |
| Zfp39         | chr11:58888152-58904225   | 10.3671  | 9.4599   | -0.1321 | 0.608870 |
| Snap47        | chr11:59407133-59451186   | 12.6710  | 11.2912  | -0.1663 | 0.650558 |
| Top3a         | chr11:60740057-60777365   | 8.6233   | 7.9952   | -0.1091 | 0.524340 |
| Epn2          | chr11:61517248-61579687   | 0.4298   | 0.2803   | -0.6170 | 0.499023 |
| Gm26964       | chr11:61865474-61867639   | 8.3017   | 6.8771   | -0.2716 | 0.376274 |
| Stx8          | chr11:67966192-68207148   | 3.9302   | 4.4250   | 0.1711  | 0.395649 |
| Vamp2         | chr11:69088489-69092384   | 5.6320   | 4.9985   | -0.1722 | 0.544088 |
| Trappc1       | chr11:69323979-69325793   | 24.7026  | 27.7171  | 0.1661  | 0.486933 |
| Arrb2         | chr11:70432634-70440828   | 59.8504  | 56.6499  | -0.0793 | 0.595178 |
| Slc25a11      | chr11:70644195-70647479   | 45.6979  | 49.1050  | 0.1037  | 0.312091 |
| Eno3          | chr11:70657201-70662513   | 11.7700  | 10.6157  | -0.1489 | 0.416865 |
| Xaf1          | chr11:72301628-72313733   | 9.6311   | 10.8263  | 0.1688  | 0.581739 |
| Rap1gap2      | chr11:74383355-74590186   | 5.4985   | 6.3269   | 0.2025  | 0.631055 |
| Tsr1          | chr11:74898070-74909342   | 31.4888  | 29.1888  | -0.1094 | 0.682485 |
| Wdr81         | chr11:75440943-75454717   | 8.7011   | 9.6429   | 0.1483  | 0.590166 |
| Ccdc55        | chr11:77044291-77078435   | 10.7567  | 9.8523   | -0.1267 | 0.610426 |
| Nufip2        | chr11:77686154-77741921   | 51.4110  | 48.7998  | -0.0752 | 0.626384 |
| Dhrs13        | chr11:78032279-78037866   | 3.1468   | 2.6102   | -0.2697 | 0.478324 |
| Rpl23a        | chr11:78180931-78183584   | 6.4361   | 8.0700   | 0.3264  | 0.521604 |
| Gm11192       | chr11:78278737-78279066   | 23.9980  | 18.4309  | -0.3808 | 0.489907 |
| Zfp830        | chr11:82764344-82767622   | 12.6070  | 11.4253  | -0.1420 | 0.620541 |
| Sfn1          | chr11:83116848-83122670   | 126.3122 | 136.2332 | 0.1091  | 0.514978 |
| Tada2a        | chr11:84078919-84129600   | 4.8462   | 4.0982   | -0.2419 | 0.592883 |
| 2610027K06Rik | chr11:85791660-85832223   | 0.3324   | 0.5364   | 0.6906  | 0.242932 |
| Cuedc1        | chr11:88098057-88194140   | 0.7386   | 0.9072   | 0.2966  | 0.244708 |
| Wfikkn2       | chr11:94235955-94246005   | 1.4290   | 1.8333   | 0.3595  | 0.542081 |
| Spop          | chr11:95414079-95493406   | 15.4066  | 16.8653  | 0.1305  | 0.366353 |
| Pcgf2         | chr11:97688822-97700497   | 0.6731   | 0.8935   | 0.4087  | 0.385816 |
| Ikzf3         | chr11:98464901-98546031   | 25.4800  | 24.3763  | -0.0639 | 0.595901 |
| Gm12359       | chr11:98797706-98810087   | 11.2507  | 10.0712  | -0.1598 | 0.567450 |
| Gm11560       | chr11:99932161-99933109   | 1.5593   | 2.3003   | 0.5610  | 0.491055 |
| Zfp385c       | chr11:100627542-100692455 | 1.3778   | 1.1058   | -0.3173 | 0.444058 |
| Wnk4          | chr11:101260566-101277409 | 1.1885   | 0.8712   | -0.4480 | 0.595403 |
| Slc25a39      | chr11:102402984-102407946 | 16.8542  | 15.5335  | -0.1177 | 0.548409 |
| Map3k14       | chr11:103219761-103267472 | 9.5646   | 8.7941   | -0.1212 | 0.618636 |
| Plekhl1       | chr11:103365087-103412664 | 5.6540   | 5.0769   | -0.1553 | 0.593396 |
| Tlk2          | chr11:105178806-105283959 | 16.1183  | 17.2453  | 0.0975  | 0.317606 |
| Ddx42         | chr11:106216925-106249139 | 55.0916  | 52.6637  | -0.0650 | 0.486288 |
| Psmc5         | chr11:106256153-106263120 | 56.6213  | 52.4614  | -0.1101 | 0.616439 |
| Rgs9          | chr11:109225354-109298129 | 1.1455   | 1.4706   | 0.3604  | 0.562421 |
| Cpsf4l        | chr11:113698171-113710017 | 1.4774   | 1.1555   | -0.3545 | 0.303110 |
| Nup85         | chr11:115564433-115583985 | 21.8465  | 23.7884  | 0.1229  | 0.382153 |
| Slc25a19      | chr11:115614177-115628295 | 14.6131  | 16.2506  | 0.1532  | 0.567242 |
| 2310067B10Rik | chr11:115765432-115799366 | 8.4961   | 9.4232   | 0.1494  | 0.535074 |
| Tsen54        | chr11:115814723-115823094 | 9.8557   | 8.9703   | -0.1358 | 0.384397 |
| Lig2          | chr11:115824048-115855780 | 7.2033   | 6.5324   | -0.1410 | 0.673857 |
| Acox1         | chr11:116171887-116199045 | 7.7436   | 8.6436   | 0.1586  | 0.503189 |
| Gm11724       | chr11:117789896-117791313 | 28.4958  | 25.2806  | -0.1727 | 0.385637 |
| Gaa           | chr11:119267886-119285454 | 5.9470   | 5.2866   | -0.1698 | 0.631057 |
| Mafg          | chr11:120625116-120633600 | 7.8197   | 8.5654   | 0.1314  | 0.265726 |
| Dnajb9        | chr12:44205896-44210068   | 4.6742   | 5.9257   | 0.3423  | 0.525012 |
| Lrr1          | chr12:69168813-69179010   | 1.8343   | 2.4488   | 0.4168  | 0.445266 |
| Gm9887        | chr12:69371834-69372458   | 26.3006  | 22.4744  | -0.2268 | 0.668056 |
| Pygl          | chr12:70190810-70231488   | 0.3270   | 0.5101   | 0.6414  | 0.445835 |
| Actr10        | chr12:70937856-70964718   | 18.3978  | 20.1014  | 0.1278  | 0.506763 |
| Zbtb1         | chr12:76370265-76396950   | 17.0779  | 16.4218  | -0.0565 | 0.389765 |
| Erh           | chr12:80634021-80644341   | 3.3168   | 2.5447   | -0.3823 | 0.563454 |
| Aldh6a1       | chr12:84430722-84450950   | 4.1263   | 4.8100   | 0.2212  | 0.467808 |
| Zc3h14        | chr12:98746967-98787774   | 38.0515  | 40.5192  | 0.0907  | 0.195678 |
| Wars          | chr12:108860029-108894174 | 27.4742  | 25.9443  | -0.0827 | 0.535811 |
| Cep170b       | chr12:112722173-112746591 | 2.9593   | 2.5751   | -0.2006 | 0.606539 |
| Btbd6         | chr12:112976481-112978930 | 20.3265  | 18.8522  | -0.1086 | 0.565743 |
| Igh3          | chr12:113359664-113361232 | 1.1242   | 1.7855   | 0.6675  | 0.409565 |
| Kif13a        | chr13:46749086-46929718   | 6.1609   | 6.9688   | 0.1778  | 0.631200 |
| Mirlet7d      | chr13:48536011-48536114   | 10.6634  | 15.4730  | 0.5371  | 0.252624 |
| Sptlc1        | chr13:53332715-53377365   | 28.5747  | 26.7334  | -0.0961 | 0.587204 |
| Arl10         | chr13:54575014-54581128   | 3.2403   | 3.9793   | 0.2964  | 0.412188 |

|               |                           |          |          |         |          |
|---------------|---------------------------|----------|----------|---------|----------|
| Tmed9         | chr13:55593134-55597663   | 52.3191  | 49.5251  | -0.0792 | 0.395923 |
| Pcbd2         | chr13:55727367-55776830   | 12.0679  | 14.7987  | 0.2943  | 0.454043 |
| Zfp934        | chr13:62517499-62520544   | 1.3398   | 0.8457   | -0.6639 | 0.487831 |
| Rsl1          | chr13:67173206-67183126   | 11.6293  | 10.2512  | -0.1820 | 0.609207 |
| ElI2          | chr13:75707483-75772356   | 3.3723   | 2.7952   | -0.2708 | 0.642375 |
| Arsk          | chr13:76060421-76098660   | 2.6786   | 2.3078   | -0.2150 | 0.588030 |
| Rasa1         | chr13:85214779-85289029   | 49.2744  | 47.3263  | -0.0582 | 0.549411 |
| Tmem167       | chr13:90089122-90143907   | 9.9500   | 10.8165  | 0.1205  | 0.489881 |
| Iqgap2        | chr13:95627176-95891922   | 35.9029  | 33.8620  | -0.0844 | 0.675699 |
| Cdk7          | chr13:100697026-100730942 | 8.6488   | 8.1640   | -0.0832 | 0.378347 |
| Ipo11         | chr13:106794438-106936915 | 14.3950  | 15.7782  | 0.1324  | 0.411915 |
| Dimt1         | chr13:106947128-106960224 | 5.7298   | 4.9900   | -0.1994 | 0.591931 |
| Ndufaf2       | chr13:108052589-108158625 | 11.6063  | 9.7943   | -0.2449 | 0.396123 |
| Esm1          | chr13:113209658-113218098 | 0.5765   | 1.0121   | 0.8121  | 0.546838 |
| Iitga2        | chr13:114835915-114932041 | 3.9504   | 4.6160   | 0.2246  | 0.511991 |
| Gatad1        | chr5:3632931-3647934      | 16.8201  | 18.1201  | 0.1074  | 0.101385 |
| Abcb1b        | chr5:8798146-8866314      | 7.3334   | 8.2329   | 0.1669  | 0.572939 |
| Sema3d        | chr5:12383165-12588943    | 0.3208   | 0.2044   | -0.6498 | 0.542757 |
| Phtf2         | chr5:20758662-20882124    | 14.0666  | 15.3140  | 0.1226  | 0.542293 |
| Gm25219       | chr5:23487393-23487723    | 18.3756  | 22.7041  | 0.3052  | 0.596981 |
| Agap3         | chr5:24452176-24502047    | 16.2629  | 17.6809  | 0.1206  | 0.303455 |
| Gbx1          | chr5:24502756-24527276    | 0.2339   | 0.3831   | 0.7115  | 0.406258 |
| Chpf2         | chr5:24586740-24594395    | 16.0267  | 14.8640  | -0.1087 | 0.647146 |
| Lrpap1        | chr5:35091489-35105766    | 12.0236  | 13.2686  | 0.1421  | 0.457168 |
| Acox3         | chr5:35583039-35613801    | 6.4927   | 7.2038   | 0.1499  | 0.565309 |
| Qdpr          | chr5:45434031-45450235    | 17.4071  | 15.8841  | -0.1321 | 0.578231 |
| Med28         | chr5:45520220-45529276    | 10.0469  | 11.2494  | 0.1631  | 0.556002 |
| Lcorl         | chr5:45697180-45857615    | 3.8973   | 4.3230   | 0.1495  | 0.502714 |
| Tbc1d19       | chr5:53809626-53904380    | 2.3772   | 1.9278   | -0.3023 | 0.547978 |
| Fam114a1      | chr5:64970070-65041874    | 1.1088   | 0.8121   | -0.4492 | 0.505344 |
| Atp8a1        | chr5:67618139-67847432    | 9.3254   | 8.7625   | -0.0898 | 0.608142 |
| CommD8        | chr5:72156999-72168183    | 16.5513  | 18.8270  | 0.1859  | 0.623134 |
| Ociad2        | chr5:73322198-73338947    | 0.3181   | 0.5167   | 0.6998  | 0.225016 |
| Usp46         | chr5:73998462-74068430    | 3.5283   | 3.0831   | -0.1946 | 0.598757 |
| C530008M17Rik | chr5:76657682-76873554    | 0.5349   | 0.4376   | -0.2898 | 0.386314 |
| Dck           | chr5:88764995-88783281    | 24.5084  | 26.4532  | 0.1102  | 0.242066 |
| Lin54         | chr5:100441917-100500639  | 7.5171   | 8.2384   | 0.1322  | 0.385222 |
| Gbp11         | chr5:105323041-105346472  | 1.2687   | 0.9712   | -0.3855 | 0.386481 |
| Gm15787       | chr5:110154399-110176504  | 5.6603   | 6.4981   | 0.1991  | 0.366932 |
| Gm26718       | chr5:110259162-110269847  | 25.6729  | 23.6581  | -0.1179 | 0.492717 |
| Fbrsl1        | chr5:110361753-110448503  | 4.2607   | 4.9041   | 0.2029  | 0.567947 |
| Gm15989       | chr5:110905243-110905741  | 2.2485   | 1.1508   | -0.9663 | 0.591983 |
| Srrd          | chr5:112337391-112343040  | 13.7830  | 12.0810  | -0.1901 | 0.650940 |
| Coro1c        | chr5:113842435-113908758  | 11.1395  | 10.6116  | -0.0700 | 0.489879 |
| Taok3         | chr5:117120128-117275219  | 8.4924   | 7.8982   | -0.1046 | 0.688746 |
| Erp29         | chr5:121428589-121452506  | 10.3380  | 11.1756  | 0.1124  | 0.408873 |
| Anapc5        | chr5:12278468-122821339   | 89.8700  | 97.4827  | 0.1173  | 0.567830 |
| A930024E05Rik | chr5:122989353-122998345  | 14.8924  | 13.6691  | -0.1237 | 0.477417 |
| Rhof          | chr5:123103043-123132692  | 30.3605  | 28.6371  | -0.0843 | 0.636728 |
| 2810006K23Rik | chr5:124328088-124341844  | 2.8739   | 2.4461   | -0.2325 | 0.350510 |
| Gbas          | chr5:129725062-129758327  | 13.6203  | 15.0521  | 0.1442  | 0.351405 |
| Sbds          | chr5:130245730-130255530  | 34.9188  | 32.8846  | -0.0866 | 0.376637 |
| Gm10369       | chr5:134676489-134680145  | 1.1118   | 1.6447   | 0.5648  | 0.364671 |
| Stx1a         | chr5:135023481-135051100  | 4.2934   | 3.6781   | -0.2232 | 0.608964 |
| Dnajc30       | chr5:135064205-135065365  | 8.2646   | 6.9848   | -0.2427 | 0.509976 |
| Baz1b         | chr5:135187263-135246129  | 41.2426  | 39.4829  | -0.0629 | 0.557930 |
| Pom121        | chr5:135376140-135394546  | 3.7401   | 3.2772   | -0.1906 | 0.673456 |
| Pcolce        | chr5:137605102-137613784  | 2.5951   | 2.2728   | -0.1913 | 0.155519 |
| Ftsj2         | chr5:140327673-140331898  | 4.3717   | 5.4016   | 0.3052  | 0.527518 |
| Zfp316        | chr5:143249696-143270022  | 1.6208   | 1.9089   | 0.2361  | 0.444856 |
| Cav2          | chr6:17281184-17289115    | 0.2809   | 0.1427   | -0.9774 | 0.405105 |
| Lrrc4         | chr6:28661830-28831747    | 0.8381   | 0.5882   | -0.5108 | 0.672678 |
| Cnot4         | chr6:35022065-35133737    | 8.7265   | 7.9406   | -0.1362 | 0.693865 |
| Zc3hav1       | chr6:38305285-38354603    | 110.6428 | 106.6857 | -0.0525 | 0.539737 |
| Trbv13-2      | chr6:41121416-41121832    | 164.0052 | 179.6145 | 0.1312  | 0.379393 |
| Znrf2         | chr6:54816915-54893500    | 44.9092  | 47.7147  | 0.0874  | 0.329039 |
| Fam188b       | chr6:55203382-55320222    | 0.2091   | 0.1040   | -1.0080 | 0.485714 |
| Herc6         | chr6:57580991-57665136    | 18.2351  | 20.1874  | 0.1467  | 0.630011 |
| Gm26712       | chr6:57689432-57689649    | 30.0044  | 24.2272  | -0.3085 | 0.531957 |
| Herc3         | chr6:58831464-58920398    | 19.3354  | 18.3446  | -0.0759 | 0.588253 |
| Pole4         | chr6:82618991-82705365    | 19.3241  | 17.7703  | -0.1209 | 0.574953 |

|               |                          |          |          |         |          |
|---------------|--------------------------|----------|----------|---------|----------|
| Paip2b        | chr6:83805400-83831741   | 10.8562  | 9.9359   | -0.1278 | 0.654457 |
| Fam136a       | chr6:86365682-86370057   | 15.1115  | 17.5663  | 0.2172  | 0.605385 |
| Gt(ROSA)26Sor | chr6:113067427-113077333 | 22.6688  | 20.7363  | -0.1285 | 0.554848 |
| Sec13         | chr6:113728066-113740743 | 60.8348  | 65.8970  | 0.1153  | 0.477428 |
| NA            | chr6:115675994-115677136 | 10.3145  | 12.6265  | 0.2918  | 0.618802 |
| Hnrnpf        | chr6:117900323-117925622 | 26.1375  | 24.7288  | -0.0799 | 0.424515 |
| Bid           | chr6:120891929-120916853 | 13.4484  | 12.6083  | -0.0931 | 0.441573 |
| Dusp16        | chr6:134715472-134792625 | 1.4838   | 1.2507   | -0.2465 | 0.601147 |
| Apold1        | chr6:134982000-134986836 | 0.4287   | 0.6626   | 0.6283  | 0.394743 |
| Arhgdib       | chr6:136923522-136941899 | 289.1383 | 311.0213 | 0.1053  | 0.545971 |
| Pyroxd1       | chr6:142345653-142363257 | 10.8605  | 11.9773  | 0.1412  | 0.464293 |
| Itpr2         | chr6:146108298-146502223 | 39.0491  | 37.1998  | -0.0700 | 0.689761 |
| Tmem190       | chr7:4782939-4784341     | 1.5301   | 0.7843   | -0.9642 | 0.399090 |
| Zc3h4         | chr7:16401195-16437694   | 21.5453  | 20.1021  | -0.1000 | 0.662445 |
| Hif3a         | chr7:17031506-17062427   | 0.2801   | 0.1862   | -0.5888 | 0.521479 |
| Ccdc61        | chr7:18890882-18910415   | 9.9584   | 8.9128   | -0.1600 | 0.489018 |
| Gm10676       | chr7:18989553-18992774   | 4.3807   | 3.8292   | -0.1941 | 0.494452 |
| Mark4         | chr7:19426074-19458494   | 7.1342   | 6.2047   | -0.2014 | 0.624936 |
| Irgq          | chr7:24530647-24538599   | 3.7378   | 4.1651   | 0.1562  | 0.336872 |
| Gm15495       | chr7:25442151-25443463   | 1.2849   | 0.8152   | -0.6565 | 0.469977 |
| Map4k1        | chr7:28982853-29003279   | 50.1729  | 47.9931  | -0.0641 | 0.508955 |
| Zbtb32        | chr7:30589680-30598909   | 15.0870  | 17.1575  | 0.1855  | 0.600164 |
| Spib          | chr7:44525994-44532071   | 0.7847   | 0.4707   | -0.7373 | 0.474671 |
| Sergef        | chr7:46443167-46639807   | 3.2759   | 3.9670   | 0.2761  | 0.374041 |
| Crebzf        | chr7:90442728-90447717   | 52.9356  | 50.7454  | -0.0610 | 0.523592 |
| Gm23973       | chr7:103271549-103271870 | 11.4144  | 14.2511  | 0.3202  | 0.267991 |
| Plekha7       | chr7:116123492-116308376 | 1.2262   | 1.4786   | 0.2701  | 0.515647 |
| 2610020H08Rik | chr7:119794005-119848943 | 6.8895   | 7.7349   | 0.1670  | 0.509612 |
| Dcun1d3       | chr7:119853162-119896291 | 5.8128   | 6.4718   | 0.1549  | 0.539409 |
| Tnrc6a        | chr7:123123884-123195288 | 30.3748  | 29.0916  | -0.0623 | 0.547993 |
| Kctd13        | chr7:126928878-126945631 | 5.4963   | 6.4327   | 0.2270  | 0.493614 |
| Prrt2         | chr7:127016770-127021211 | 5.9202   | 5.2149   | -0.1830 | 0.627599 |
| Ilgax         | chr7:128129546-128150656 | 0.8351   | 0.6200   | -0.4298 | 0.575150 |
| Fuom          | chr7:140096769-140102441 | 1.0278   | 1.3064   | 0.3460  | 0.423528 |
| Polr2l        | chr7:141471859-141475132 | 2.7349   | 3.6068   | 0.3992  | 0.626732 |
| Ctsd          | chr7:142371147-142388038 | 111.6069 | 119.9513 | 0.1040  | 0.494898 |
| 9530052E02Rik | chr8:11007849-11054541   | 0.8201   | 0.5259   | -0.6410 | 0.454043 |
| Fnta          | chr8:25998728-26015601   | 34.9330  | 38.2709  | 0.1317  | 0.439997 |
| Zfp703        | chr8:26977335-26981461   | 0.7846   | 1.0209   | 0.3798  | 0.224572 |
| AA386476      | chr8:47675390-47677055   | 2.9137   | 2.3319   | -0.3213 | 0.406015 |
| Vegfc         | chr8:54077531-54186454   | 1.1070   | 1.5371   | 0.4736  | 0.476535 |
| Klh2          | chr8:64739862-64849818   | 11.5626  | 12.8683  | 0.1543  | 0.432549 |
| Ints10        | chr8:68793928-68829410   | 7.3257   | 8.0091   | 0.1287  | 0.416609 |
| NA            | chr8:69165744-69184215   | 0.7024   | 0.4262   | -0.7207 | 0.476289 |
| 281042815Rik  | chr8:70504291-70506752   | 8.3474   | 9.9383   | 0.2517  | 0.583477 |
| Ell           | chr8:70539674-70592858   | 8.1061   | 9.1230   | 0.1705  | 0.457903 |
| Zfp961        | chr8:71951037-71993408   | 8.1609   | 9.2340   | 0.1782  | 0.554281 |
| Slc35e1       | chr8:72480640-72492614   | 21.9536  | 23.6724  | 0.1087  | 0.359241 |
| Arhgap10      | chr8:77250365-77517907   | 13.0632  | 14.5790  | 0.1584  | 0.549390 |
| Lyl1          | chr8:84701456-84704715   | 1.8359   | 1.3640   | -0.4286 | 0.517855 |
| Rad23a        | chr8:84834018-84840665   | 37.7204  | 35.3578  | -0.0933 | 0.605969 |
| Orc6          | chr8:85299631-85308278   | 20.0370  | 18.0943  | -0.1471 | 0.624986 |
| Heatr3        | chr8:88137854-88172027   | 13.3203  | 14.6584  | 0.1381  | 0.474182 |
| B3gnt9        | chr8:105252637-105255153 | 3.3277   | 2.8244   | -0.2366 | 0.389142 |
| Gm16209       | chr8:107037479-107038106 | 1.9128   | 1.0911   | -0.8099 | 0.404765 |
| Gabarapl2     | chr8:111940702-111953612 | 4.5027   | 5.2679   | 0.2264  | 0.376500 |
| Cmip          | chr8:117257018-117461503 | 10.0169  | 9.0452   | -0.1472 | 0.657619 |
| Jph3          | chr8:121729622-121794276 | 0.4272   | 0.2792   | -0.6139 | 0.452624 |
| Klhdc4        | chr8:121796312-121829569 | 8.0863   | 7.4227   | -0.1235 | 0.416558 |
| Taf5l         | chr8:123996317-124021309 | 21.5468  | 20.1158  | -0.0992 | 0.620912 |
| Gm16163       | chr8:124831697-124863703 | 9.1855   | 10.6663  | 0.2156  | 0.223852 |
| Tomm20        | chr8:126930663-126945921 | 11.0166  | 12.2663  | 0.1550  | 0.521534 |
| Ccdc82        | chr9:13246981-13289409   | 42.2275  | 39.1333  | -0.1098 | 0.605884 |
| Pin1          | chr9:20652129-20666584   | 7.7315   | 8.6792   | 0.1668  | 0.509120 |
| Pde4a         | chr9:21165713-21213248   | 0.2995   | 0.4057   | 0.4377  | 0.393853 |
| Ets1          | chr9:32696041-32757820   | 532.9602 | 562.1623 | 0.0770  | 0.307130 |
| 4930581F22Rik | chr9:35116727-35130922   | 15.9071  | 14.7453  | -0.1094 | 0.641967 |
| Pus3          | chr9:35558594-35567183   | 23.6462  | 25.6362  | 0.1166  | 0.371978 |
| Rnf26         | chr9:44066326-44113517   | 1.3091   | 1.5965   | 0.2864  | 0.394979 |
| Mpzl3         | chr9:45055185-45077436   | 5.6005   | 5.1993   | -0.1072 | 0.212912 |
| Gm20612       | chr9:45261054-45261290   | 3.6023   | 5.5705   | 0.6289  | 0.554097 |



|               |                           |          |          |         |          |
|---------------|---------------------------|----------|----------|---------|----------|
| Cox5a         | chr9:57521231-57532424    | 74.1081  | 82.0670  | 0.1472  | 0.495327 |
| Pkm           | chr9:59656367-59679375    | 253.9072 | 273.2775 | 0.1061  | 0.587775 |
| Smad3         | chr9:63646766-63757994    | 23.9860  | 22.4259  | -0.0970 | 0.664798 |
| Aph1b         | chr9:66775201-66795490    | 0.4689   | 0.6157   | 0.3930  | 0.305266 |
| Gm17477       | chr9:80118894-80121937    | 7.7070   | 6.9350   | -0.1523 | 0.434531 |
| Lca5          | chr9:83390292-83441127    | 1.8193   | 1.5508   | -0.2304 | 0.641218 |
| 4930579K19Rik | chr9:98562959-98563611    | 3.3296   | 2.2346   | -0.5753 | 0.563745 |
| 3000002C10Rik | chr9:109827942-109832706  | 0.8822   | 0.7027   | -0.3282 | 0.279750 |
| Abhd5         | chr9:122351607-122381524  | 2.7153   | 3.2390   | 0.2545  | 0.493898 |
| Hdac6         | chrX:7930119-7947889      | 5.6375   | 5.1117   | -0.1413 | 0.579447 |
| Ebp           | chrX:8185328-8193512      | 23.6891  | 25.9691  | 0.1326  | 0.429108 |
| Lancl3        | chrX:9199901-9268085      | 1.1691   | 1.5305   | 0.3886  | 0.596545 |
| Gm14493       | chrX:10717472-10718710    | 8.6534   | 11.0367  | 0.3510  | 0.464964 |
| Zfp182        | chrX:21028938-21062316    | 9.3298   | 10.5709  | 0.1802  | 0.604216 |
| Dock11        | chrX:35888831-36076562    | 57.3011  | 54.8594  | -0.0628 | 0.637355 |
| Bcor1         | chrX:48341357-48408049    | 0.9184   | 0.7680   | -0.2580 | 0.472165 |
| Elf4          | chrX:48411045-48463132    | 16.2067  | 14.8641  | -0.1248 | 0.701300 |
| Mir5116       | chrX:56587851-56587914    | 31.3081  | 21.9889  | -0.5098 | 0.415159 |
| Nsdhl         | chrX:72918556-72958514    | 6.7325   | 6.0000   | -0.1662 | 0.503456 |
| Xlr4b         | chrX:73214332-73222453    | 3.9793   | 4.8714   | 0.2918  | 0.541090 |
| Slc6a8        | chrX:73673149-73682502    | 0.6045   | 0.7853   | 0.3774  | 0.380384 |
| Naa10         | chrX:73916872-73921944    | 20.8755  | 19.4474  | -0.1022 | 0.585885 |
| Tab3          | chrX:85574021-85634469    | 3.3910   | 3.9674   | 0.2265  | 0.575396 |
| Eif2s3x       | chrX:94188706-94212862    | 4.1089   | 4.8450   | 0.2378  | 0.601503 |
| Zc3h12b       | chrX:95711677-95932637    | 0.9918   | 0.8311   | -0.2551 | 0.414240 |
| Ftx           | chrX:103560906-103623754  | 3.2533   | 3.8053   | 0.2261  | 0.647776 |
| NA            | chrX:136741857-136743143  | 2.5700   | 1.9808   | -0.3757 | 0.390884 |
| Plp1          | chrX:136822670-136839733  | 0.8113   | 0.6394   | -0.3434 | 0.403851 |
| Lhfp1         | chrX:145290358-145349089  | 0.4912   | 0.2569   | -0.9351 | 0.417578 |
| NA            | chrX:150408583-150440905  | 5.8300   | 7.0975   | 0.2838  | 0.504775 |
| Fam120c       | chrX:151344174-151471842  | 3.1315   | 3.7726   | 0.2687  | 0.537045 |
| Hsd17b10      | chrX:152001844-152004442  | 25.0304  | 32.1579  | 0.3615  | 0.434037 |
| Gm650         | chrX:155304198-155305749  | 0.9947   | 1.4584   | 0.5520  | 0.426412 |
| Fancb         | chrX:164980591-164997272  | 3.3207   | 2.8396   | -0.2258 | 0.372971 |
| AW549877      | chr15:3982035-3995752     | 16.8395  | 16.0320  | -0.0709 | 0.212593 |
| 1810049J17Rik | chr15:12321437-12321899   | 64.9187  | 73.6651  | 0.1823  | 0.594540 |
| Zfp706        | chr15:36997030-37007402   | 13.0653  | 12.0546  | -0.1161 | 0.615083 |
| Ubr5          | chr15:37967327-38078853   | 41.3588  | 39.7694  | -0.0565 | 0.594141 |
| Utp23         | chr15:51877428-51884614   | 6.9149   | 7.8616   | 0.1851  | 0.412460 |
| D15Ertd621e   | chr15:58415467-58457801   | 19.3069  | 18.3730  | -0.0715 | 0.335014 |
| Mtss1         | chr15:58941243-59082026   | 8.0802   | 7.5182   | -0.1040 | 0.394580 |
| Fam84b        | chr15:60818995-60825080   | 2.8962   | 3.2875   | 0.1828  | 0.367002 |
| Fbxl6         | chr15:76535729-76538746   | 25.2771  | 23.1807  | -0.1249 | 0.639156 |
| Polr2f        | chr15:79141350-79151774   | 38.3186  | 44.7240  | 0.2230  | 0.584675 |
| Nhp2l1        | chr15:82041318-82047598   | 5.3559   | 6.3283   | 0.2407  | 0.484771 |
| Cpt1b         | chr15:89416404-89425863   | 1.7981   | 1.3807   | -0.3811 | 0.624926 |
| Scaf11        | chr15:96411697-96460843   | 38.3144  | 36.8222  | -0.0573 | 0.529635 |
| Tuba1c        | chr15:99029890-99038105   | 11.0547  | 12.4902  | 0.1761  | 0.341175 |
| Tfcp2         | chr15:100502798-100552008 | 4.5736   | 3.9724   | -0.2033 | 0.600145 |
| Gm16741       | chr14:7749944-7775528     | 0.7076   | 1.1178   | 0.6597  | 0.412045 |
| Abhd6         | chr14:8002901-8056555     | 2.7381   | 3.3361   | 0.2850  | 0.406109 |
| Thoc7         | chr14:13949013-13961225   | 55.9800  | 61.7293  | 0.1410  | 0.485694 |
| Nr1d2         | chr14:18204053-18239127   | 7.9580   | 8.9817   | 0.1746  | 0.496446 |
| Ppif          | chr14:25694153-25700468   | 8.1872   | 7.4702   | -0.1322 | 0.476445 |
| Mapk1ip1l     | chr14:47298313-47323204   | 13.6888  | 12.7041  | -0.1077 | 0.599923 |
| Peli2         | chr14:48120868-48260883   | 0.4747   | 0.3399   | -0.4817 | 0.452989 |
| Osgep         | chr14:50906477-50924893   | 5.5779   | 6.2176   | 0.1566  | 0.439423 |
| Arhgef40      | chr14:51984718-52006251   | 0.2176   | 0.2963   | 0.4457  | 0.476698 |
| Trav1         | chr14:52427927-52428874   | 2.6035   | 1.3539   | -0.9433 | 0.373544 |
| Trav14-1      | chr14:53554056-53554554   | 14.2369  | 17.6009  | 0.3060  | 0.426726 |
| Traj7         | chr14:54211469-54211528   | 63.0560  | 84.4398  | 0.4213  | 0.545647 |
| Oxa1l         | chr14:54360840-54369669   | 24.8621  | 22.7656  | -0.1271 | 0.689768 |
| Cdh24         | chr14:54631991-54641364   | 2.9955   | 3.5816   | 0.2578  | 0.438977 |
| Ngdn          | chr14:55015453-55024135   | 58.8119  | 54.4865  | -0.1102 | 0.670045 |
| Psme2         | chr14:55587440-55591113   | 37.8920  | 41.9505  | 0.1468  | 0.554375 |
| Tm9sf1        | chr14:55635964-55643806   | 15.2571  | 16.4991  | 0.1129  | 0.222643 |
| Gmpr2         | chr14:55672234-55678750   | 20.6091  | 19.1166  | -0.1085 | 0.171582 |
| Gjb2          | chr14:57098599-57104702   | 5.0411   | 4.2048   | -0.2617 | 0.603663 |
| Cryl1         | chr14:57275033-57398483   | 8.8000   | 10.0675  | 0.1941  | 0.197279 |
| N6amt2        | chr14:57549597-57571569   | 28.3164  | 32.2076  | 0.1858  | 0.537200 |
| Rcctb1        | chr14:59201208-59237265   | 23.3904  | 21.9070  | -0.0945 | 0.674817 |

|               |                           |           |           |         |          |
|---------------|---------------------------|-----------|-----------|---------|----------|
| Nupl1         | chr14:60219203-60251507   | 39.2849   | 37.5673   | -0.0645 | 0.234715 |
| R3hcc1        | chr14:69697306-69707584   | 8.3775    | 7.5664    | -0.1469 | 0.496775 |
| Ccar2         | chr14:70138176-70153811   | 34.2497   | 36.7598   | 0.1020  | 0.412804 |
| Slc39a14      | chr14:70303468-70351425   | 3.3064    | 3.6425    | 0.1397  | 0.129984 |
| Rcctb2        | chr14:73123036-73207843   | 8.2664    | 9.0072    | 0.1238  | 0.426481 |
| Dgkh          | chr14:78569608-78725089   | 2.7811    | 3.3741    | 0.2788  | 0.564093 |
| Naa16         | chr14:79334203-79390778   | 8.3118    | 7.7140    | -0.1077 | 0.592764 |
| Gm26773       | chr14:118107830-118117100 | 3.5378    | 2.9192    | -0.2773 | 0.665049 |
| Zfp160        | chr17:21008940-21028852   | 12.9502   | 14.5182   | 0.1649  | 0.542153 |
| Zfp760        | chr17:21707740-21725636   | 8.8655    | 8.0983    | -0.1306 | 0.613412 |
| Zfp943        | chr17:21962551-22071168   | 8.6721    | 9.6109    | 0.1483  | 0.461453 |
| Thoc6         | chr17:23668613-23673882   | 12.0745   | 10.7519   | -0.1674 | 0.562412 |
| Traf7         | chr17:24508561-24527938   | 23.8029   | 22.7854   | -0.0630 | 0.365024 |
| Snora78       | chr17:24719675-24719803   | 66.1564   | 78.2584   | 0.2424  | 0.432798 |
| Lmf1          | chr17:25579173-25662826   | 1.4028    | 1.2481    | -0.1685 | 0.604244 |
| Fam173a       | chr17:25790507-25792284   | 47.5478   | 53.0507   | 0.1580  | 0.553128 |
| 4930539E08Rik | chr17:28896396-28915324   | 1.4301    | 1.1501    | -0.3144 | 0.618726 |
| Kctd20        | chr17:28951949-28969549   | 20.1799   | 21.7528   | 0.1083  | 0.300641 |
| Slc37a1       | chr17:31295482-31350696   | 13.3264   | 12.2398   | -0.1227 | 0.600734 |
| Rasal3        | chr17:32390658-32403583   | 75.2863   | 71.8200   | -0.0680 | 0.630343 |
| Slc39a7       | chr17:34028266-34031690   | 41.1777   | 38.7288   | -0.0885 | 0.642999 |
| Stk19         | chr17:34823992-34836945   | 3.7371    | 3.2917    | -0.1831 | 0.357502 |
| Ehmt2         | chr17:34898468-34914052   | 34.3661   | 37.3052   | 0.1184  | 0.575779 |
| Gm16181       | chr17:35220833-35224134   | 6.6571    | 5.1527    | -0.3696 | 0.472268 |
| AY036118      | chr17:39848102-39848827   | 793.0361  | 745.9478  | -0.0883 | 0.695523 |
| Gm23657       | chr17:46992622-46992916   | 4.7894    | 3.1961    | -0.5835 | 0.389027 |
| Usp49         | chr17:47630689-47686738   | 2.7193    | 2.4322    | -0.1610 | 0.598316 |
| Tomm6os       | chr17:47687609-47691083   | 1.4678    | 1.1989    | -0.2920 | 0.159534 |
| Pp2d1         | chr17:53507459-53539451   | 0.3040    | 0.5040    | 0.7296  | 0.349555 |
| Gm9311        | chr17:73190257-73191685   | 3.2089    | 4.0497    | 0.3357  | 0.382456 |
| Dpy30         | chr17:74299473-74323944   | 24.4184   | 21.7558   | -0.1666 | 0.584906 |
| Rmdn2         | chr17:79614899-79682152   | 2.3703    | 3.0446    | 0.3612  | 0.552762 |
| Thumpd2       | chr17:81026326-81065085   | 7.3476    | 8.6376    | 0.2333  | 0.518325 |
| Gm1976        | chr17:94759943-94834799   | 2.9656    | 3.6269    | 0.2904  | 0.385069 |
| 1700037C18Rik | chr16:3895178-3908689     | 11.0711   | 10.1840   | -0.1205 | 0.468140 |
| NA            | chr16:3908856-3909192     | 9.5878    | 7.3626    | -0.3810 | 0.306939 |
| Coro7         | chr16:4626132-4679777     | 15.7862   | 14.6478   | -0.1080 | 0.710129 |
| Tvp23a        | chr16:10420556-10447362   | 10.1901   | 9.3963    | -0.1170 | 0.573378 |
| Gspt1         | chr16:11219291-11254270   | 30.0552   | 28.4361   | -0.0799 | 0.536361 |
| Gm15869       | chr16:14316073-14317285   | 3.9333    | 2.9575    | -0.4114 | 0.458053 |
| Parl          | chr16:20279819-20302387   | 8.1267    | 9.1322    | 0.1683  | 0.482739 |
| Tra2b         | chr16:22244548-22266005   | 25.2320   | 23.8676   | -0.0802 | 0.559036 |
| 1110054M08Rik | chr16:24391611-24393588   | 2.4216    | 3.0847    | 0.3492  | 0.347540 |
| Ccdc50        | chr16:27388868-27452218   | 14.8658   | 14.0576   | -0.0806 | 0.587546 |
| Nit2          | chr16:57156670-57167332   | 15.0591   | 17.1131   | 0.1845  | 0.524515 |
| Ltn1          | chr16:87376650-87432606   | 19.2412   | 20.6258   | 0.1003  | 0.410016 |
| Bach1         | chr16:87698944-87733346   | 7.7750    | 7.2030    | -0.1103 | 0.574755 |
| Gm6293        | chr19:5415564-5415759     | 12.5846   | 8.7944    | -0.5170 | 0.462317 |
| Snx32         | chr19:5495277-5510489     | 9.2458    | 10.4822   | 0.1811  | 0.216517 |
| Malat1        | chr19:5795689-5802672     | 1827.7525 | 1728.2905 | -0.0807 | 0.737374 |
| Esrra         | chr19:6910976-6921813     | 10.3098   | 11.6832   | 0.1804  | 0.543434 |
| Fen1          | chr19:10199131-10204169   | 30.1128   | 32.8318   | 0.1247  | 0.439707 |
| Tle4          | chr19:14448071-14598051   | 13.6679   | 12.7081   | -0.1050 | 0.593258 |
| Sorbs1        | chr19:40295048-40402267   | 4.1746    | 3.5162    | -0.2476 | 0.614190 |
| Avp1          | chr19:42123272-42129059   | 2.6516    | 1.9565    | -0.4385 | 0.546381 |
| Mir5114       | chr19:44303170-44303231   | 52.5055   | 37.0351   | -0.5036 | 0.639081 |
| NA            | chr19:45578276-45579763   | 11.4120   | 13.5165   | 0.2442  | 0.273595 |
| 4930505N22Rik | chr19:45998136-46013386   | 0.9389    | 0.4648    | -1.0145 | 0.381418 |
| Psd           | chr19:46312086-46327156   | 2.9091    | 2.4454    | -0.2505 | 0.565257 |
| Trim8         | chr19:46501647-46516444   | 24.1035   | 26.7841   | 0.1521  | 0.610784 |
| Atp6v1h       | chr1:5083172-5162549      | 30.0329   | 32.4691   | 0.1125  | 0.225993 |
| Kcnq5         | chr1:21398402-21961942    | 5.1230    | 4.6570    | -0.1376 | 0.657405 |
| Ccdc115       | chr1:34436670-34439672    | 12.0528   | 13.9858   | 0.2146  | 0.578052 |
| Coa5          | chr1:37417083-37430103    | 29.5825   | 31.8541   | 0.1067  | 0.415472 |
| Osgepl1       | chr1:53313623-53326343    | 3.3209    | 3.7833    | 0.1881  | 0.459721 |
| 9430016H08Rik | chr1:57406327-57417953    | 3.9197    | 3.4304    | -0.1923 | 0.537444 |
| Pard3b        | chr1:61638823-62642284    | 0.1346    | 0.0736    | -0.8705 | 0.574623 |
| Gm6189        | chr1:80383103-80385188    | 0.5382    | 0.3122    | -0.7855 | 0.370800 |
| Arl4c         | chr1:88673124-88702221    | 48.7135   | 51.9700   | 0.0934  | 0.426868 |
| Pam           | chr1:97795113-98095646    | 1.5515    | 1.8207    | 0.2309  | 0.516659 |
| Clasp1        | chr1:118389057-118609432  | 14.4493   | 13.5195   | -0.0960 | 0.634773 |

|               |                          |           |           |         |          |
|---------------|--------------------------|-----------|-----------|---------|----------|
| Tmem177       | chr1:119907889-119913208 | 4.1826    | 3.7495    | -0.1577 | 0.267565 |
| Srgap2        | chr1:131285250-131527361 | 6.3578    | 6.9298    | 0.1243  | 0.291330 |
| Lamc1         | chr1:153218921-153332786 | 12.3229   | 13.8072   | 0.1641  | 0.671446 |
| Mr1           | chr1:155127877-155146780 | 12.1587   | 13.6353   | 0.1654  | 0.551204 |
| Gm10031       | chr1:156524091-156526659 | 0.8631    | 1.2577    | 0.5432  | 0.336312 |
| Ccdc181       | chr1:164275584-164287847 | 6.6082    | 5.8532    | -0.1750 | 0.059734 |
| Rcsd1         | chr1:165648944-165708094 | 77.0163   | 82.1943   | 0.0939  | 0.312321 |
| Cd247         | chr1:165788680-165877276 | 94.9216   | 100.3684  | 0.0805  | 0.221553 |
| Igsf8         | chr1:172261640-172319841 | 3.8484    | 3.3103    | -0.2173 | 0.663636 |
| BC094916      | chr1:173519716-173535957 | 13.3848   | 15.2899   | 0.1920  | 0.624648 |
| Efcab2        | chr1:178405880-178483247 | 1.0823    | 1.4642    | 0.4360  | 0.421553 |
| Ahctf1        | chr1:179744893-179803680 | 33.7531   | 32.5001   | -0.0546 | 0.485102 |
| Adck3         | chr1:180165237-180199602 | 5.0724    | 4.5947    | -0.1427 | 0.562298 |
| Psen2         | chr1:180227003-180263438 | 34.0910   | 36.9074   | 0.1145  | 0.530162 |
| A230020J21Rik | chr1:191025349-191026186 | 6.5301    | 7.9189    | 0.2782  | 0.266472 |
| Gm15872       | chr1:193187374-193192011 | 19.0055   | 16.2021   | -0.2302 | 0.498509 |
| Svil          | chr18:4920539-5119299    | 10.7793   | 10.1170   | -0.0915 | 0.603985 |
| Zeb1          | chr18:5591859-5775467    | 10.7889   | 10.1504   | -0.0880 | 0.555611 |
| Kctd1         | chr18:14968684-15151446  | 2.1504    | 2.7198    | 0.3389  | 0.525754 |
| Trappc8       | chr18:20817223-20896078  | 31.0719   | 29.6779   | -0.0662 | 0.545011 |
| Dnd1          | chr18:36763670-36766214  | 3.7787    | 4.3928    | 0.2173  | 0.223122 |
| Taf7          | chr18:37640901-37644204  | 13.6883   | 15.4696   | 0.1765  | 0.558409 |
| Arap3         | chr18:37972623-37997574  | 0.4815    | 0.6732    | 0.4835  | 0.508256 |
| Ticam2        | chr18:46559154-46574533  | 1.1088    | 0.8464    | -0.3896 | 0.614906 |
| Tmed7         | chr18:46560234-46597535  | 16.4899   | 17.7398   | 0.1054  | 0.339390 |
| C330018D20Rik | chr18:56955832-56975368  | 4.2456    | 4.8910    | 0.2041  | 0.429890 |
| Fbxo38        | chr18:62504068-62548743  | 38.9241   | 41.4124   | 0.0894  | 0.156001 |
| Fech          | chr18:64456549-64489066  | 9.5117    | 8.6602    | -0.1353 | 0.495642 |
| Gm20544       | chr18:75365331-75367088  | 0.6090    | 1.2363    | 1.0214  | 0.491552 |
| Rpl21-ps8     | chr18:82523538-82524021  | 2.0637    | 1.0396    | -0.9892 | 0.406749 |
| Kin           | chr2:10080592-10092806   | 16.0672   | 17.8930   | 0.1553  | 0.467763 |
| Rsu1          | chr2:13076966-13271431   | 4.5277    | 4.9799    | 0.1373  | 0.371234 |
| Yme11         | chr2:23156368-23199260   | 41.5547   | 39.2658   | -0.0817 | 0.648896 |
| Sapcd2        | chr2:25372320-25378213   | 1.9494    | 2.4829    | 0.3490  | 0.573272 |
| Fbxw5         | chr2:25500749-25505471   | 15.3363   | 17.0841   | 0.1557  | 0.528229 |
| Edf1          | chr2:25557846-25562082   | 59.2016   | 65.5963   | 0.1480  | 0.577277 |
| Mamdc4        | chr2:25563114-25574845   | 5.7395    | 6.5090    | 0.1815  | 0.518133 |
| Snhg7         | chr2:26637176-26640244   | 11.9995   | 10.9677   | -0.1297 | 0.533764 |
| Snora43       | chr2:26637847-26637974   | 12.9427   | 7.1539    | -0.8553 | 0.392330 |
| Zer1          | chr2:30097282-30124585   | 10.4231   | 9.8111    | -0.0873 | 0.612642 |
| Swi5          | chr2:32278815-32288075   | 32.1971   | 29.2867   | -0.1367 | 0.672188 |
| Zbtb26        | chr2:37432167-37443121   | 7.9025    | 7.3285    | -0.1088 | 0.505197 |
| Mettl5        | chr2:69871197-69885615   | 16.6076   | 15.4700   | -0.1024 | 0.443853 |
| Gorasp2       | chr2:70661575-70712636   | 22.4770   | 21.3769   | -0.0724 | 0.481785 |
| Dync1i2       | chr2:71211705-71263303   | 14.2897   | 15.3372   | 0.1021  | 0.314658 |
| Wipf1         | chr2:73429609-73529734   | 21.6374   | 20.1226   | -0.1047 | 0.705651 |
| Ptpmt1        | chr2:90908715-90918258   | 11.7041   | 12.8092   | 0.1302  | 0.185107 |
| D930015M05Rik | chr2:92408891-92432308   | 1.7951    | 1.2339    | -0.5408 | 0.510585 |
| Ccdc32        | chr2:119017778-119029393 | 5.7288    | 6.8827    | 0.2648  | 0.528931 |
| Wdr76         | chr2:121506722-121544860 | 8.9909    | 9.9004    | 0.1390  | 0.484528 |
| Slc24a5       | chr2:125068123-125088677 | 8.5778    | 7.5519    | -0.1838 | 0.559191 |
| Shc4          | chr2:125627446-125724148 | 1.0073    | 1.2628    | 0.3262  | 0.562079 |
| Dtwd1         | chr2:126152140-126165279 | 8.3050    | 7.1617    | -0.2137 | 0.490415 |
| Zfp661        | chr2:127574661-127587094 | 0.9641    | 0.7844    | -0.2976 | 0.476798 |
| Il1b          | chr2:129364569-129371139 | 0.7892    | 0.5272    | -0.5821 | 0.431417 |
| Snrpb         | chr2:130171413-130179403 | 76.6944   | 83.1596   | 0.1168  | 0.548590 |
| Gm11688       | chr2:144261233-144261541 | 4.0203    | 6.9089    | 0.7811  | 0.502340 |
| Slc24a3       | chr2:145167753-145642166 | 0.8506    | 1.1835    | 0.4765  | 0.647509 |
| Pygb          | chr2:150786734-150831758 | 34.7891   | 37.1181   | 0.0935  | 0.408255 |
| Nfs1          | chr2:156078928-156144186 | 16.4042   | 15.4971   | -0.0821 | 0.405046 |
| Mybl2         | chr2:163054686-163084688 | 2.0732    | 2.4878    | 0.2630  | 0.556064 |
| Pabpc1        | chr2:164025449-164050538 | 0.6828    | 0.4577    | -0.5769 | 0.452215 |
| Dbndd2        | chr2:164486105-164493319 | 1.6277    | 1.9477    | 0.2590  | 0.455531 |
| Gm14321       | chr2:167777466-167782569 | 6.9765    | 5.6306    | -0.3092 | 0.470784 |
| Adrm1         | chr2:180171484-180176286 | 5.8043    | 5.2005    | -0.1585 | 0.625627 |
| mt-Co1        | chrM:5327-6872           | 2607.6938 | 2765.2277 | 0.0846  | 0.479981 |
| Lrrcc1        | chr3:14533787-14572658   | 11.0324   | 11.9857   | 0.1196  | 0.489383 |
| Hltf          | chr3:20057810-20118490   | 31.1102   | 29.5037   | -0.0765 | 0.605985 |
| Actl6a        | chr3:32708545-32726968   | 35.3306   | 33.2077   | -0.0894 | 0.568076 |
| Serp1         | chr3:58521968-58525873   | 92.6541   | 100.5156  | 0.1175  | 0.594253 |
| Tlr2          | chr3:83836272-83841767   | 3.3713    | 2.8160    | -0.2596 | 0.634230 |

|               |                           |           |           |         |          |
|---------------|---------------------------|-----------|-----------|---------|----------|
| Pear1         | chr3:87747889-87824306    | 9.9349    | 11.2045   | 0.1735  | 0.612140 |
| Chtop         | chr3:90498955-90509498    | 59.3614   | 63.6415   | 0.1004  | 0.473940 |
| Anp32e        | chr3:95929245-95947390    | 24.4540   | 22.7353   | -0.1051 | 0.667476 |
| Gm20633       | chr3:96243549-96246380    | 1.1109    | 1.4811    | 0.4149  | 0.525713 |
| Polr3c        | chr3:96711489-96727628    | 18.0731   | 16.8142   | -0.1042 | 0.559578 |
| Bcl9          | chr3:97203661-97228846    | 1.1520    | 0.9684    | -0.2506 | 0.629407 |
| Ptgrn         | chr3:101040231-101110278  | 6.9855    | 6.3905    | -0.1284 | 0.624277 |
| Phtf1         | chr3:103968109-104024598  | 15.5041   | 16.7477   | 0.1113  | 0.462011 |
| Rap1a         | chr3:105727266-105801330  | 42.2930   | 45.8430   | 0.1163  | 0.408649 |
| Lamtor5       | chr3:107278857-107284079  | 20.9340   | 23.5920   | 0.1724  | 0.303036 |
| Rbm15         | chr3:107326109-107333289  | 31.9805   | 30.1291   | -0.0860 | 0.572238 |
| Prpf38b       | chr3:108902666-108911727  | 54.6449   | 52.4827   | -0.0582 | 0.453726 |
| S1pr1         | chr3:115710432-115715055  | 161.6912  | 155.7543  | -0.0540 | 0.463071 |
| Gm26530       | chr3:116488965-116493358  | 4.1730    | 4.8702    | 0.2229  | 0.499966 |
| Hiat1         | chr3:116631163-116681260  | 25.3588   | 27.4126   | 0.1124  | 0.437245 |
| Frrs1         | chr3:116878226-116903750  | 6.8605    | 5.9472    | -0.2061 | 0.605932 |
| Gclm          | chr3:122245556-122269984  | 2.8209    | 3.1989    | 0.1814  | 0.329853 |
| Slc9b2        | chr3:135307699-135342767  | 4.3011    | 3.7831    | -0.1851 | 0.498328 |
| Odf2l         | chr3:145118588-145153915  | 3.4116    | 4.0594    | 0.2508  | 0.404076 |
| Tmem55a       | chr4:14864075-14915176    | 7.7399    | 8.7938    | 0.1842  | 0.294598 |
| Ube2r2        | chr4:41135742-41193380    | 21.9118   | 20.6357   | -0.0866 | 0.545324 |
| Abca1         | chr4:53030786-53159895    | 3.2776    | 3.6711    | 0.1636  | 0.492052 |
| Fktn          | chr4:53713997-53765785    | 3.0604    | 2.7524    | -0.1530 | 0.551037 |
| Haus6         | chr4:86578854-86612055    | 9.0521    | 9.9092    | 0.1305  | 0.484538 |
| Mysm1         | chr4:94942039-94979100    | 22.3949   | 21.4433   | -0.0626 | 0.351004 |
| Tm2d1         | chr4:98355369-98383306    | 7.6610    | 6.3616    | -0.2681 | 0.553884 |
| Tceanc2       | chr4:107134154-107179116  | 6.8851    | 6.4455    | -0.0952 | 0.426554 |
| Coa7          | chr4:108328139-108341544  | 5.5651    | 4.9142    | -0.1794 | 0.647130 |
| Kti12         | chr4:108847856-108849412  | 24.9401   | 22.8527   | -0.1261 | 0.552415 |
| Nsun4         | chr4:116032841-116053876  | 8.4138    | 9.6239    | 0.1939  | 0.590972 |
| Zmpste24      | chr4:121059236-121098241  | 8.7292    | 9.6310    | 0.1418  | 0.482793 |
| Zc3h12a       | chr4:125118422-125127840  | 11.8577   | 13.1501   | 0.1493  | 0.426501 |
| Ago4          | chr4:126489540-126533472  | 0.2146    | 0.1310    | -0.7121 | 0.543505 |
| Lck           | chr4:129548343-129573641  | 186.8882  | 199.5918  | 0.0949  | 0.480602 |
| Shhg3         | chr4:132348013-132353686  | 288.1736  | 356.6325  | 0.3075  | 0.557747 |
| Snora73a      | chr4:132352774-132352979  | 1308.8858 | 1617.3979 | 0.3053  | 0.571082 |
| E2f2          | chr4:136172393-136196057  | 18.0536   | 19.9417   | 0.1435  | 0.583447 |
| Alpl          | chr4:137741732-137796384  | 1.8743    | 1.5265    | -0.2961 | 0.610248 |
| Gm13068       | chr4:149748517-149749607  | 1.6712    | 2.3611    | 0.4985  | 0.487783 |
| Park7         | chr4:150897132-150914437  | 36.7436   | 40.0363   | 0.1238  | 0.474510 |
| Per3          | chr4:151003651-151044665  | 0.5916    | 0.7484    | 0.3393  | 0.537468 |
| Zbtb48        | chr4:152019773-152027671  | 5.4336    | 6.3497    | 0.2248  | 0.584526 |
| Acot7         | chr4:152178133-152271855  | 36.7656   | 40.3149   | 0.1330  | 0.550776 |
| Smim1         | chr4:154020469-154026230  | 3.2445    | 2.9314    | -0.1464 | 0.363201 |
| Agri          | chr4:156165289-156197488  | 2.3066    | 2.6112    | 0.1790  | 0.411733 |
| Gamt          | chr10:80258150-80261012   | 1.1128    | 0.6363    | -0.8063 | 0.544065 |
| Gm26876       | chr10:128645883-128649811 | 0.3422    | 0.5689    | 0.7335  | 0.321690 |
| Etaa1os       | chr11:17953969-17959578   | 1.9734    | 2.9660    | 0.5878  | 0.511831 |
| Wdpcp         | chr11:21572234-21898989   | 0.3475    | 0.5262    | 0.5985  | 0.392557 |
| Nipal4        | chr11:46148154-46166508   | 0.4252    | 0.2854    | -0.5754 | 0.475716 |
| Gm12346       | chr11:77293443-77295898   | 0.3335    | 0.1823    | -0.8716 | 0.521134 |
| Snord42a      | chr11:78181298-78181363   | 13.1633   | 22.0281   | 0.7428  | 0.388718 |
| Gm10478       | chr12:20896238-20896638   | 1.0785    | 2.4756    | 1.1987  | 0.543238 |
| Fam150b       | chr12:30884321-30893854   | 0.5833    | 0.3711    | -0.6525 | 0.142647 |
| Gm5436        | chr12:84258331-84258973   | 1.0312    | 1.9926    | 0.9504  | 0.444013 |
| Gm15478       | chr5:67642400-67646776    | 0.4967    | 0.7966    | 0.6813  | 0.425953 |
| NA            | chr5:139378219-139379259  | 0.8001    | 0.3691    | -1.1161 | 0.430692 |
| Gm7887        | chr6:48524371-48525105    | 1.1377    | 1.8589    | 0.7083  | 0.443041 |
| Podxl2        | chr6:88842557-88875044    | 0.1715    | 0.2928    | 0.7719  | 0.357941 |
| Rassf4        | chr6:116633007-116673836  | 0.2849    | 0.4386    | 0.6224  | 0.476684 |
| Klrb1f        | chr6:129045900-129057471  | 0.8309    | 1.2491    | 0.5882  | 0.359685 |
| Gm26610       | chr7:30650384-30652711    | 1.1664    | 1.8867    | 0.6938  | 0.429340 |
| Plekha4       | chr7:45526329-45554229    | 0.0919    | 0.2058    | 1.1630  | 0.480882 |
| B230325K18Rik | chr7:127983078-127985701  | 2.9612    | 2.2687    | -0.3843 | 0.639206 |
| Tnnt3         | chr7:142498835-142516009  | 1.9936    | 3.0263    | 0.6022  | 0.504353 |
| Gm26909       | chr8:22644860-22646286    | 1.5726    | 2.5737    | 0.7107  | 0.329566 |
| Lrp2bp        | chr8:45999302-46029477    | 0.2636    | 0.4096    | 0.6359  | 0.473220 |
| Gm17072       | chr8:81827662-81829275    | 2.7713    | 5.3584    | 0.9513  | 0.426126 |
| Gnao1         | chr8:93809965-93969388    | 0.1509    | 0.2509    | 0.7332  | 0.471400 |
| Mtss1l        | chr8:110721475-110741400  | 0.0962    | 0.1641    | 0.7703  | 0.360828 |
| Kirrel3os     | chr9:34918232-34929509    | 0.3610    | 0.1905    | -0.9223 | 0.501822 |

|               |                           |         |         |         |          |
|---------------|---------------------------|---------|---------|---------|----------|
| Cdhr4         | chr9:107983286-107999684  | 0.5789  | 0.8865  | 0.6148  | 0.528705 |
| Amt           | chr9:108296852-108301571  | 1.2543  | 1.9219  | 0.6156  | 0.423058 |
| 5730405O15Rik | chrX:13042014-13045297    | 2.1072  | 2.9432  | 0.4821  | 0.425420 |
| Dnajb7        | chr15:81407087-81408273   | 0.7575  | 1.2360  | 0.7062  | 0.408813 |
| Mtrf1         | chr14:79397771-79423650   | 1.9322  | 3.7448  | 0.9546  | 0.293222 |
| H2-Q10        | chr17:35470088-35474563   | 0.4993  | 0.3177  | -0.6522 | 0.590852 |
| Zfp119b       | chr17:55938552-55945174   | 6.0618  | 7.8517  | 0.3733  | 0.529302 |
| Tmcc2         | chr1:132356314-132391281  | 0.1749  | 0.2837  | 0.6980  | 0.263648 |
| Cfap45        | chr1:172521043-172545870  | 0.1325  | 0.2971  | 1.1645  | 0.394202 |
| Gm15480       | chr1:179538416-179538935  | 3.6519  | 2.3525  | -0.6345 | 0.481553 |
| A430105J06Rik | chr1:186749395-186752921  | 0.5395  | 0.9456  | 0.8096  | 0.434138 |
| 9230102O04Rik | chr2:9883040-9889540      | 0.8041  | 1.3944  | 0.7941  | 0.423157 |
| Gm13341       | chr2:22587290-22587962    | 0.6083  | 1.0835  | 0.8329  | 0.250935 |
| Gm14168       | chr2:156571791-156577457  | 0.3313  | 0.5346  | 0.6901  | 0.329164 |
| 4930405A21Rik | chr2:156714539-156720909  | 1.1205  | 0.6608  | -0.7619 | 0.527888 |
| Gm14305       | chr2:176708327-176721813  | 0.6066  | 0.9305  | 0.6172  | 0.465955 |
| Gm14295       | chr2:176798611-176811223  | 1.2168  | 2.2279  | 0.8726  | 0.234267 |
| NA            | chr18:50046739-50047152   | 1.2153  | 2.7546  | 1.1806  | 0.520704 |
| Selenbp1      | chr3:94933055-94944758    | 0.1504  | 0.3226  | 1.1008  | 0.363240 |
| Gm16253       | chr3:96576983-96580663    | 2.2546  | 3.4971  | 0.6333  | 0.332912 |
| A530072M11Rik | chr4:16164109-16266225    | 0.5603  | 0.9342  | 0.7376  | 0.525370 |
| Zfyve9        | chr4:108637465-108780798  | 0.3637  | 0.2455  | -0.5671 | 0.508913 |
| Foxd2         | chr4:114906279-114908898  | 0.2759  | 0.4868  | 0.8193  | 0.459174 |
| Cited4        | chr4:120666562-120667820  | 0.8834  | 0.4951  | -0.8354 | 0.478755 |
| Gm12905       | chr4:123905061-123917269  | 0.7322  | 1.4432  | 0.9791  | 0.460783 |
| Gm13154       | chr4:147553276-147585198  | 0.5025  | 0.2756  | -0.8667 | 0.408471 |
| Metrn1        | chr11:121701543-121716306 | 0.6663  | 1.1656  | 0.8067  | 0.526864 |
| Dmpk          | chr7:19083848-19093821    | 0.1952  | 0.0970  | -1.0082 | 0.574635 |
| Klk1b27       | chr7:44052289-44056705    | 0.4326  | 0.9004  | 1.0578  | 0.447737 |
| Gm16177       | chr8:86659317-86660035    | 1.4256  | 0.7759  | -0.8777 | 0.588586 |
| Snora34       | chr15:98519715-98519853   | 7.8383  | 4.0494  | -0.9528 | 0.533586 |
| Rbm11         | chr16:75592843-75602829   | 0.1782  | 0.3588  | 1.0099  | 0.452150 |
| 1700092M07Rik | chr19:8740717-8741225     | 1.3565  | 2.4250  | 0.8381  | 0.329088 |
| Gm17214       | chr3:69320044-69320585    | 2.3847  | 1.2957  | -0.8801 | 0.605720 |
| Gm13097       | chr4:149478665-149483531  | 1.1814  | 0.5257  | -1.1683 | 0.556834 |
| Wdr78         | chr4:103038064-103114555  | 1.6030  | 1.3962  | -0.1993 | 0.577230 |
| Gm15898       | chr8:120095059-120097736  | 2.9637  | 4.7757  | 0.6883  | 0.685033 |
| Pak4          | chr7:28558818-28598185    | 2.9703  | 2.5350  | -0.2286 | 0.548948 |
| Fam166a       | chr2:25218744-2522280     | 3.2837  | 2.2426  | -0.5501 | 0.574368 |
| Ehd4          | chr2:120089174-120154606  | 5.5070  | 6.1707  | 0.1642  | 0.454465 |
| Mettl25       | chr10:105763188-105841380 | 5.9109  | 5.2435  | -0.1728 | 0.522062 |
| Unc13d        | chr11:116062094-116077961 | 54.7557 | 51.9621 | -0.0756 | 0.686915 |
| Gxylt1        | chr15:93239741-93275161   | 5.5290  | 6.0660  | 0.1337  | 0.348280 |
| Gpr137c       | chr14:45219718-45281230   | 0.3779  | 0.2634  | -0.5210 | 0.210906 |
| Rhbdl1        | chr17:25834468-25837157   | 5.9650  | 4.9828  | -0.2596 | 0.584414 |
| Ppp1r18os     | chr17:35860917-35866886   | 4.3619  | 5.7297  | 0.3935  | 0.620953 |
| Fastkd2       | chr1:63730613-63754655    | 6.0567  | 6.7095  | 0.1477  | 0.473551 |
| Ralb          | chr1:119470304-119504794  | 3.4048  | 3.0573  | -0.1553 | 0.430136 |
| Bmi1          | chr2:18677017-18686629    | 26.7066 | 24.7864 | -0.1076 | 0.691180 |
| Psd4          | chr2:24367579-24409182    | 67.1963 | 64.6158 | -0.0565 | 0.619045 |
| Arhgap29      | chr3:121953228-122016677  | 0.4237  | 0.6176  | 0.5438  | 0.544462 |
| Fam132a       | chr4:155962317-155966629  | 7.3061  | 8.7817  | 0.2654  | 0.530005 |
| 4930595D18Rik | chr12:111159849-111184491 | 3.3379  | 2.2370  | -0.5774 | 0.573775 |
| Rin1          | chr19:5050807-5057071     | 0.2175  | 0.3595  | 0.7251  | 0.518629 |
| Gm12363       | chr4:34842984-34843652    | 1.6844  | 0.9225  | -0.8685 | 0.440661 |
| Nudt2         | chr4:41465150-41480926    | 10.1649 | 8.5313  | -0.2528 | 0.547061 |
| Gm16234       | chr10:14664219-14668318   | 12.9631 | 15.1912 | 0.2288  | 0.456985 |
| Pias4         | chr10:81153265-81167923   | 7.3273  | 6.7235  | -0.1241 | 0.610731 |
| Klhl10        | chr11:100441916-100457022 | 0.5700  | 0.3478  | -0.7129 | 0.471056 |
| Stat3         | chr11:100885097-100939540 | 36.8529 | 39.1038 | 0.0855  | 0.408612 |
| Tbc1d16       | chr11:119143044-119228499 | 0.8131  | 0.6497  | -0.3237 | 0.566135 |
| Gm20604       | chr12:102741731-102758672 | 6.4906  | 7.3401  | 0.1774  | 0.373176 |
| Nin1          | chr13:49187484-49196244   | 5.1470  | 6.1962  | 0.2677  | 0.535219 |
| Gm5665        | chr13:62699405-62726689   | 0.9147  | 0.5875  | -0.6386 | 0.554324 |
| Mcm2          | chr6:88883474-88898780    | 56.1803 | 53.4476 | -0.0719 | 0.657578 |
| BC064078      | chr6:128992960-129008040  | 4.5581  | 5.2107  | 0.1930  | 0.194491 |
| Leng1         | chr7:3660097-3665840      | 10.7200 | 9.7401  | -0.1436 | 0.566097 |
| Fam168a       | chr7:100706650-100841628  | 6.0816  | 5.6668  | -0.1019 | 0.500200 |
| Zfp553        | chr7:127233060-127238179  | 12.7427 | 11.8462 | -0.1052 | 0.546379 |
| Srpr          | chr9:35200174-35247973    | 21.9954 | 23.8616 | 0.1175  | 0.478799 |
| C030014I23Rik | chr9:44477923-44482180    | 0.8707  | 0.6148  | -0.5020 | 0.524605 |

|               |                           |          |          |         |          |
|---------------|---------------------------|----------|----------|---------|----------|
| Ssr4          | chrX:73787027-73790830    | 22.0042  | 23.8320  | 0.1151  | 0.455454 |
| Synj2         | chr17:5941279-6044290     | 9.7064   | 9.0722   | -0.0975 | 0.664974 |
| Dhx57         | chr17:80238303-80290476   | 17.8146  | 19.2872  | 0.1146  | 0.471872 |
| Gm15789       | chr1:66783912-66786445    | 1.8459   | 1.3748   | -0.4251 | 0.361317 |
| Phlda3        | chr1:135766118-135769136  | 1.7622   | 1.3700   | -0.3632 | 0.247545 |
| Lbr           | chr1:181815315-181842401  | 106.6102 | 112.3892 | 0.0762  | 0.128420 |
| 5830417110Rik | chr3:88775215-88826328    | 3.4028   | 3.1562   | -0.1085 | 0.512022 |
| Tnc           | chr4:63959784-64047015    | 0.6547   | 0.8650   | 0.4020  | 0.662556 |
| lft74         | chr4:94614490-94693229    | 2.4950   | 1.9743   | -0.3377 | 0.601810 |
| 3110007F17Rik | chrX:123103494-123188795  | 0.0840   | 0.1470   | 0.8082  | 0.287961 |
| Stx19         | chr16:62814675-62824346   | 0.5272   | 0.8123   | 0.6237  | 0.506340 |
| Peak1os       | chr9:56257889-56267780    | 1.3516   | 2.1094   | 0.6422  | 0.543488 |
| ll17rd        | chr14:27039000-27107286   | 0.1375   | 0.0823   | -0.7407 | 0.590849 |
| Gstt3         | chr10:75774114-75781414   | 1.8551   | 2.2994   | 0.3098  | 0.461948 |
| Gm16172       | chr17:45663518-45666209   | 2.5161   | 3.4953   | 0.4742  | 0.422991 |
| C1ql3         | chr2:13003456-13011747    | 0.5962   | 0.9197   | 0.6254  | 0.458717 |
| Zscan20       | chr4:128583538-128610098  | 3.5496   | 3.1870   | -0.1555 | 0.686099 |
| Zfp593        | chr4:134243288-134245592  | 11.1899  | 10.2725  | -0.1234 | 0.440991 |
| Slc12a5       | chr2:164960815-164999727  | 0.1435   | 0.2200   | 0.6163  | 0.450929 |
| Ddb1          | chr19:10605624-10629813   | 113.2880 | 108.6523 | -0.0603 | 0.653781 |
| Fbxo18        | chr2:11742572-11777582    | 16.0275  | 17.2907  | 0.1094  | 0.415429 |
| Zfr2          | chr10:81233154-81252123   | 0.8354   | 1.0159   | 0.2823  | 0.465067 |
| Dnajc14       | chr10:128803675-128819446 | 36.6857  | 35.3487  | -0.0536 | 0.212267 |
| Ero1lb        | chr13:12565882-12609526   | 5.3032   | 4.8628   | -0.1251 | 0.387887 |
| Zfp131        | chr13:119765186-119790805 | 32.5432  | 30.7826  | -0.0802 | 0.593770 |
| Gm26205       | chr5:121205009-121205143  | 21.4023  | 16.0995  | -0.4108 | 0.468572 |
| Scarb1        | chr5:125277086-125341094  | 2.6875   | 2.4341   | -0.1429 | 0.326994 |
| Gm13833       | chr6:31102845-31104646    | 5.2913   | 7.0713   | 0.4184  | 0.659749 |
| Slc41a3       | chr6:90604724-90646412    | 2.9674   | 3.4671   | 0.2245  | 0.354157 |
| Zfand4        | chr6:116264221-116330298  | 1.3701   | 1.1074   | -0.3071 | 0.496192 |
| Ppfbp1        | chr6:14688486-147032025   | 3.2006   | 3.5513   | 0.1500  | 0.492310 |
| 1700049G17Rik | chr7:27907391-27929460    | 1.2609   | 1.6089   | 0.3517  | 0.576282 |
| Pak1          | chr7:97842934-97912381    | 2.2921   | 2.7229   | 0.2485  | 0.484648 |
| Birc3         | chr9:7848698-7873186      | 28.8258  | 30.6274  | 0.0875  | 0.167114 |
| Anp32a        | chr9:62341292-62378812    | 57.2407  | 62.3418  | 0.1232  | 0.623306 |
| Gm16185       | chr9:97085325-97088610    | 8.9147   | 8.0841   | -0.1411 | 0.658709 |
| Snrk          | chr9:122117282-122169702  | 18.4286  | 17.5723  | -0.0686 | 0.534855 |
| Rbm10         | chrX:20617502-20650901    | 15.0823  | 16.3871  | 0.1197  | 0.434317 |
| Taz           | chrX:74281911-74290151    | 14.4737  | 13.6822  | -0.0811 | 0.527509 |
| Ctps2         | chrX:162901237-163032508  | 28.5466  | 30.4343  | 0.0924  | 0.305866 |
| Rhebl1        | chr15:98877777-98881404   | 3.6384   | 3.0874   | -0.2369 | 0.482964 |
| Tdrd3         | chr14:87416638-87545373   | 6.7716   | 6.2883   | -0.1068 | 0.536096 |
| Smarcal1      | chr1:72583250-72633134    | 8.5764   | 9.3147   | 0.1191  | 0.373316 |
| Gm24871       | chr1:171503047-171503163  | 66.0250  | 85.8054  | 0.3781  | 0.749313 |
| Adnp2         | chr18:80126337-80151482   | 8.5003   | 9.3630   | 0.1395  | 0.496595 |
| Commd3        | chr2:18672383-18676231    | 32.3290  | 35.0934  | 0.1184  | 0.481341 |
| Mapre1        | chr2:153741273-153773310  | 20.4328  | 22.1283  | 0.1150  | 0.571624 |
| Pltp          | chr2:164839517-164857711  | 2.8877   | 3.3868   | 0.2300  | 0.265388 |
| Mtfr1         | chr3:19187326-19220817    | 8.5944   | 9.4874   | 0.1426  | 0.483950 |
| Lrrc47        | chr4:154011730-154021513  | 13.5934  | 12.6973  | -0.0984 | 0.537825 |
| 4933406P04Rik | chr10:20310505-20312294   | 2.1893   | 1.4757   | -0.5691 | 0.598573 |
| Gm16240       | chr10:76293164-76294860   | 2.2091   | 1.3971   | -0.6610 | 0.548508 |
| Gm16312       | chr19:4000757-4001232     | 4.6384   | 6.5771   | 0.5038  | 0.529071 |
| Gm5528        | chr1:72004287-72004770    | 2.3265   | 1.3543   | -0.7806 | 0.619801 |
| NA            | chr3:88242873-88287210    | 0.4326   | 0.2099   | -1.0432 | 0.585463 |
| Ank1          | chr8:22974843-23150497    | 0.0283   | 0.0612   | 1.1140  | 0.496244 |
| Gm16725       | chr8:18652800-18678056    | 0.8881   | 0.4860   | -0.8696 | 0.446504 |
| Stx6          | chr1:155158702-155203517  | 50.0787  | 54.3319  | 0.1176  | 0.581891 |
| Slc19a1       | chr10:77032240-77061002   | 7.7799   | 7.1538   | -0.1210 | 0.628644 |
| NA            | chr5:134176357-134176956  | 2.8143   | 2.0080   | -0.4870 | 0.380274 |
| Dbp           | chr7:45705087-45710155    | 8.8127   | 7.9983   | -0.1399 | 0.590810 |
| Lemd3         | chr10:120923412-120979332 | 12.8985  | 13.9687  | 0.1150  | 0.393882 |
| Cyfp2         | chr11:46193849-46312859   | 36.9590  | 35.2702  | -0.0675 | 0.667151 |
| Pdcd6         | chr13:74303120-74317326   | 48.3396  | 45.6375  | -0.0830 | 0.542546 |
| F2rl1         | chr13:95511731-95525240   | 8.6133   | 9.8657   | 0.1958  | 0.623952 |
| Zfp956        | chr6:47953389-47965300    | 11.4277  | 10.4495  | -0.1291 | 0.588082 |
| Immt          | chr6:71831330-71875257    | 36.9013  | 35.1176  | -0.0715 | 0.631122 |
| Cd27          | chr6:125232621-125237010  | 147.1277 | 140.8312 | -0.0631 | 0.683632 |
| D6Wsu163e     | chr6:126939965-126975704  | 6.7544   | 7.9159   | 0.2289  | 0.542135 |
| Nradd         | chr9:110621136-110624393  | 1.5802   | 2.3547   | 0.5754  | 0.439961 |
| Snx12         | chrX:101097785-101222563  | 11.7687  | 10.8564  | -0.1164 | 0.585494 |

|               |                           |          |          |         |          |
|---------------|---------------------------|----------|----------|---------|----------|
| Gm6712        | chr17:17316077-17319511   | 14.6394  | 12.0349  | -0.2826 | 0.591327 |
| 4930509G22Rik | chr16:11178175-11192292   | 0.6428   | 0.4414   | -0.5422 | 0.492534 |
| Atrnl1        | chr19:57611033-58133338   | 1.5449   | 1.3194   | -0.2277 | 0.568832 |
| Rrp15         | chr1:186720977-186749358  | 13.7683  | 12.4450  | -0.1458 | 0.722872 |
| Wdr33         | chr18:31804056-31908987   | 22.6560  | 21.7014  | -0.0621 | 0.484770 |
| Elmo2         | chr2:165288030-165326479  | 8.4469   | 9.1343   | 0.1129  | 0.346100 |
| Dnajb14       | chr3:137867674-137916557  | 2.4527   | 2.7246   | 0.1516  | 0.528392 |
| Mob3b         | chr4:34949073-35157484    | 0.4902   | 0.3853   | -0.3475 | 0.274623 |
| Gm11889       | chr4:23517361-23518440    | 0.8313   | 0.4556   | -0.8677 | 0.435356 |
| Dgcr6         | chr16:18052859-18071632   | 3.4429   | 2.9825   | -0.2071 | 0.492788 |
| Gm14337       | chr2:173984481-173984691  | 11.5337  | 17.3687  | 0.5906  | 0.558853 |
| Tsen15        | chr1:152370734-152386688  | 3.8100   | 3.1767   | -0.2623 | 0.633960 |
| 5830416P10Rik | chr19:53441211-53464796   | 3.1419   | 2.8082   | -0.1620 | 0.699802 |
| Dlgap4        | chr2:156613704-156764363  | 6.9701   | 6.5349   | -0.0930 | 0.579269 |
| Gm6517        | chr5:66890363-66890884    | 6.5451   | 8.3007   | 0.3428  | 0.405208 |
| Sesn1         | chr10:41810573-41908424   | 56.7047  | 53.6362  | -0.0803 | 0.679164 |
| Dtx3          | chr10:127190377-127195728 | 23.0504  | 25.2591  | 0.1320  | 0.545766 |
| Cops3         | chr11:59817794-59839838   | 25.5460  | 27.4246  | 0.1024  | 0.363850 |
| Gm9970        | chr5:31240674-31241232    | 1.7651   | 2.5217   | 0.5146  | 0.176768 |
| Ghrl          | chr6:113716118-113719880  | 7.4761   | 5.5255   | -0.4362 | 0.680846 |
| Myo9b         | chr8:71272713-71360712    | 43.2575  | 41.0722  | -0.0748 | 0.701545 |
| NA            | chr9:88723287-88731850    | 2.9923   | 2.1393   | -0.4841 | 0.624849 |
| Praf2         | chrX:7728438-7731064      | 5.5171   | 6.7913   | 0.2998  | 0.531824 |
| Ccnf          | chr17:24223231-24251409   | 9.3255   | 10.5028  | 0.1715  | 0.601115 |
| Fabp5         | chr3:10012547-10016607    | 4.2205   | 3.7441   | -0.1728 | 0.548001 |
| Gm12799       | chr4:102046567-102049127  | 0.5020   | 0.6941   | 0.4676  | 0.214542 |
| NA            | chr1:87796466-87796817    | 2.8363   | 4.5014   | 0.6664  | 0.447375 |
| Traj57        | chr14:54158504-54158569   | 13.3221  | 6.7295   | -0.9853 | 0.581413 |
| Reep3         | chr10:67009188-67096988   | 12.1433  | 13.0828  | 0.1075  | 0.343782 |
| Gm15915       | chr10:93674217-93683322   | 0.5731   | 1.0923   | 0.9305  | 0.521655 |
| Tmem194       | chr10:127666900-127701049 | 5.6401   | 6.1695   | 0.1294  | 0.467281 |
| Sgsm2         | chr11:74849260-74897060   | 2.3673   | 2.1235   | -0.1568 | 0.531351 |
| Eif2b2        | chr12:85219480-85226628   | 23.6231  | 26.1124  | 0.1445  | 0.559513 |
| 0610007P14Rik | chr12:85815447-85824550   | 9.4359   | 10.3916  | 0.1392  | 0.532552 |
| Iscu          | chr5:113772747-113778288  | 8.4533   | 7.5120   | -0.1703 | 0.578272 |
| Fbxo21        | chr5:117976769-118010191  | 8.6599   | 7.9722   | -0.1194 | 0.581570 |
| Mrpl53        | chr6:83109094-83109939    | 17.0730  | 19.5216  | 0.1934  | 0.335756 |
| Man2c1os      | chr9:57099949-57131290    | 6.6066   | 7.4495   | 0.1732  | 0.200929 |
| Polr2m        | chr9:71478436-71485935    | 63.6963  | 61.0974  | -0.0601 | 0.541229 |
| Gm26448       | chr9:120129350-120129553  | 199.0490 | 254.6878 | 0.3556  | 0.571937 |
| Ptger4        | chr15:5206660-5244187     | 24.8054  | 26.6620  | 0.1041  | 0.529464 |
| Ccdc167       | chr17:29689377-29717012   | 13.2102  | 14.3218  | 0.1166  | 0.446680 |
| Zbtb3         | chr19:8802529-8804854     | 2.3150   | 2.7938   | 0.2712  | 0.173405 |
| Ica1l         | chr1:59989069-60043087    | 1.6951   | 2.0412   | 0.2680  | 0.513854 |
| 2810408M09Rik | chr2:165490109-165493324  | 9.8954   | 9.0677   | -0.1260 | 0.401051 |
| Gm12474       | chr3:100489663-100523920  | 1.0378   | 0.6389   | -0.6999 | 0.469900 |
| Gm26895       | chr4:11980668-11988471    | 1.8989   | 1.0378   | -0.8716 | 0.497795 |
| Gm15859       | chr16:4729868-4730809     | 0.9023   | 1.6513   | 0.8719  | 0.486360 |
| Pim3          | chr15:88862185-88865718   | 9.8219   | 8.6309   | -0.1865 | 0.696650 |
| Chmp4c        | chr3:10366906-10391005    | 0.4081   | 0.6085   | 0.5762  | 0.160396 |
| Hk1           | chr10:62268854-62379908   | 24.2822  | 23.0203  | -0.0770 | 0.695439 |
| Dcakd         | chr11:102994046-103028333 | 4.5168   | 3.8938   | -0.2141 | 0.632922 |
| Mapk3         | chr7:126759600-126765819  | 11.3509  | 10.3170  | -0.1378 | 0.570191 |
| 9430091E24Rik | chr8:111128885-111145480  | 9.7341   | 8.5499   | -0.1871 | 0.537657 |
| Zwilch        | chr9:64137143-64173104    | 3.8775   | 3.4672   | -0.1614 | 0.537589 |
| Ercc6l        | chrX:102141715-102157091  | 5.6331   | 4.9970   | -0.1729 | 0.676540 |
| Traj13        | chr14:54205740-54205797   | 53.5036  | 39.4265  | -0.4405 | 0.565313 |
| Amdhd2        | chr17:24155832-24163766   | 7.8931   | 8.9164   | 0.1759  | 0.513737 |
| Cyp26c1       | chr19:37685580-37693398   | 0.7275   | 0.5078   | -0.5187 | 0.154846 |
| Gm12966       | chr4:129899092-129899902  | 15.0698  | 13.1035  | -0.2017 | 0.572257 |
| Gm26316       | chr11:101604849-101605040 | 5.2853   | 8.9917   | 0.7666  | 0.601703 |
| Dnajc25       | chr4:58995061-59025573    | 1.0485   | 1.3705   | 0.3863  | 0.574475 |
| Gm24996       | chr2:75686739-75686838    | 3.5776   | 7.1845   | 1.0059  | 0.431760 |
| Eif6          | chr2:155819831-155826925  | 35.6519  | 33.9475  | -0.0707 | 0.539036 |
| Ptma          | chr1:86526735-86530698    | 172.5831 | 163.6490 | -0.0767 | 0.694995 |
| Cap2          | chr13:46501847-46649642   | 1.2748   | 0.9216   | -0.4681 | 0.629470 |
| Mmp19         | chr10:128790952-128800824 | 0.3925   | 0.5925   | 0.5942  | 0.404554 |
| Actr2         | chr11:20062303-20112913   | 61.0089  | 64.9915  | 0.0912  | 0.497518 |
| Calm3         | chr7:16915378-16924114    | 123.9843 | 133.3760 | 0.1053  | 0.608014 |
| Uri1          | chr7:37960001-38019542    | 17.8014  | 19.3058  | 0.1170  | 0.435307 |
| Sec23ip       | chr7:128744869-128784836  | 18.7466  | 20.0299  | 0.0955  | 0.135202 |

|               |                           |          |          |         |          |
|---------------|---------------------------|----------|----------|---------|----------|
| Fam65a        | chr8:105605228-105622194  | 2.8253   | 2.4896   | -0.1824 | 0.495005 |
| Ap2m1         | chr16:20535477-20544909   | 9.1792   | 10.0969  | 0.1375  | 0.461261 |
| Rpap1         | chr2:119763303-119787537  | 8.0884   | 7.4791   | -0.1130 | 0.655901 |
| M6pr-ps       | chr3:99500023-99502645    | 0.7226   | 0.5143   | -0.4905 | 0.519818 |
| Gm12802       | chr4:107126612-107136252  | 1.4764   | 2.1347   | 0.5320  | 0.555350 |
| Smcr8         | chr11:60777524-60788287   | 19.5199  | 18.7297  | -0.0596 | 0.496403 |
| Hs1bp3        | chr12:8313432-8343824     | 2.5446   | 2.9647   | 0.2204  | 0.151716 |
| Gm21984       | chr7:126942094-126952873  | 2.6675   | 1.9976   | -0.4172 | 0.405689 |
| Fam89b        | chr19:5728086-5729653     | 28.0735  | 31.3628  | 0.1598  | 0.593150 |
| Gm561         | chr2:144594053-144595366  | 6.3667   | 8.4901   | 0.4152  | 0.556303 |
| Syde1         | chr10:78584502-78591964   | 1.0781   | 0.8536   | -0.3369 | 0.465833 |
| Gm19898       | chr12:99245670-99245921   | 4.8830   | 2.9062   | -0.7486 | 0.554835 |
| Gm21839       | chr5:135643954-135644336  | 1.9598   | 3.2071   | 0.7106  | 0.518721 |
| 2010001A14Rik | chr11:57795498-57801417   | 1.8582   | 2.6099   | 0.4901  | 0.409811 |
| Gm15122       | chr10:80282443-80283006   | 4.3458   | 3.0587   | -0.5067 | 0.497878 |
| Csrp2         | chr10:110920176-110939599 | 4.0050   | 3.0511   | -0.3925 | 0.577111 |
| Rpl41         | chr10:128548113-128549305 | 119.6163 | 139.8635 | 0.2256  | 0.556687 |
| Tcn2          | chr11:3917191-3932159     | 10.0066  | 9.1580   | -0.1278 | 0.484694 |
| Fancl         | chr11:26386134-26471876   | 9.6050   | 8.7947   | -0.1272 | 0.645850 |
| Erlec1        | chr11:30930773-30954335   | 6.1173   | 6.9165   | 0.1772  | 0.555792 |
| 2310031A07Rik | chr11:46440361-46447248   | 20.1216  | 22.5239  | 0.1627  | 0.365084 |
| Nhp2          | chr11:51619734-51623714   | 57.8584  | 52.8770  | -0.1299 | 0.725575 |
| Rnf167        | chr11:70647234-70651421   | 68.1004  | 65.7551  | -0.0506 | 0.522220 |
| Nxn           | chr11:76257197-76399140   | 4.6372   | 4.1702   | -0.1531 | 0.494064 |
| Acbd4         | chr11:103101681-103112200 | 6.4108   | 7.1782   | 0.1631  | 0.421188 |
| Eif4a3        | chr11:119288362-119300089 | 49.3015  | 53.5720  | 0.1198  | 0.575467 |
| Tmx1          | chr12:70453094-70468040   | 21.7233  | 23.3404  | 0.1036  | 0.356183 |
| Adck1         | chr12:88360553-88461719   | 8.6637   | 9.6291   | 0.1524  | 0.302560 |
| Otub2         | chr12:103388681-103406350 | 2.5378   | 2.1916   | -0.2115 | 0.561788 |
| Slc30a9       | chr5:67306954-67358565    | 10.3531  | 9.9000   | -0.0646 | 0.407472 |
| Gm26582       | chr5:92043063-92055960    | 42.8713  | 46.1295  | 0.1057  | 0.526807 |
| Sec31a        | chr5:100361648-100416234  | 16.6496  | 15.9360  | -0.0632 | 0.573497 |
| Ung           | chr5:114130385-114139323  | 11.2230  | 10.2850  | -0.1259 | 0.573127 |
| Mepce         | chr5:137781905-137786715  | 29.5613  | 31.8479  | 0.1075  | 0.453539 |
| Heatr2        | chr5:139150222-139186510  | 8.4730   | 9.3253   | 0.1383  | 0.395063 |
| Mtif3         | chr5:146951572-146963800  | 15.6772  | 16.8844  | 0.1070  | 0.447488 |
| Gemin7        | chr7:19564945-19573823    | 11.8185  | 13.5007  | 0.1920  | 0.543472 |
| Lipe          | chr7:25379526-25398710    | 5.9111   | 5.2997   | -0.1575 | 0.679773 |
| Bcl2l12       | chr7:44991221-44998712    | 11.8823  | 13.2473  | 0.1569  | 0.443367 |
| Pgpep1l       | chr7:68236607-68264233    | 3.7817   | 4.7307   | 0.3230  | 0.354927 |
| Gm16157       | chr7:68266338-68276594    | 6.1722   | 5.4076   | -0.1908 | 0.232432 |
| Snord14a      | chr7:116333170-116333257  | 28.6432  | 38.0320  | 0.4090  | 0.563685 |
| Ears2         | chr7:122037212-122067263  | 4.2807   | 4.7567   | 0.1521  | 0.369593 |
| Gm17023       | chr8:13076076-13082740    | 9.0243   | 7.0576   | -0.3546 | 0.573947 |
| Fbxo25        | chr8:13907805-13940521    | 15.5330  | 17.5446  | 0.1757  | 0.617000 |
| Erich1        | chr8:14027564-14090327    | 11.6805  | 10.5533  | -0.1464 | 0.545839 |
| 6820431F20Rik | chr8:20262612-20297546    | 0.8831   | 0.7446   | -0.2462 | 0.522814 |
| Def8          | chr8:123442985-123463270  | 3.5391   | 4.0169   | 0.1827  | 0.437241 |
| Cep164        | chr9:45766945-45828691    | 6.9016   | 6.4264   | -0.1029 | 0.574032 |
| Ulk4          | chr9:120960267-121277197  | 3.7287   | 3.4310   | -0.1200 | 0.562626 |
| Xcr1          | chr9:123852314-123862029  | 0.3547   | 0.2039   | -0.7988 | 0.496316 |
| Prkaa1        | chr15:5143860-5181899     | 16.1102  | 17.3346  | 0.1057  | 0.398460 |
| 1810021B22Rik | chr15:89071195-89075852   | 0.9151   | 0.5411   | -0.7580 | 0.483017 |
| Cox14         | chr15:99725617-99728136   | 24.9053  | 29.3098  | 0.2349  | 0.616159 |
| Mettl3        | chr14:52294667-52305128   | 24.9345  | 23.8035  | -0.0670 | 0.540206 |
| Hsf2bp        | chr17:31944768-32034508   | 0.3825   | 0.5918   | 0.6296  | 0.450921 |
| Rab5a         | chr17:53479233-53507671   | 23.9682  | 22.4806  | -0.0924 | 0.575654 |
| Gm11110       | chr17:57092034-57105942   | 6.4772   | 7.7400   | 0.2570  | 0.414130 |
| Pmm2          | chr16:8637673-8657531     | 21.8171  | 20.6908  | -0.0765 | 0.599392 |
| Tmem191c      | chr16:17276299-17283229   | 10.7187  | 9.6341   | -0.1539 | 0.700590 |
| Runx1         | chr16:92601466-92826066   | 8.6240   | 8.1007   | -0.0903 | 0.637298 |
| Pank1         | chr19:34810893-34879455   | 0.5180   | 0.6872   | 0.4079  | 0.287913 |
| Pikfyve       | chr1:65186749-65274012    | 22.0463  | 21.0785  | -0.0648 | 0.578061 |
| Ramp1         | chr1:91179821-91225196    | 13.1095  | 14.5704  | 0.1524  | 0.571433 |
| Fh1           | chr1:175600373-175625635  | 17.8343  | 19.3363  | 0.1167  | 0.475423 |
| Disp1         | chr1:183086263-183221529  | 7.2662   | 6.7176   | -0.1133 | 0.582755 |
| Mapre2        | chr18:23752332-23893861   | 3.2718   | 3.6233   | 0.1472  | 0.544660 |
| Stard4        | chr18:33199354-33213862   | 6.0855   | 6.7468   | 0.1488  | 0.512774 |
| Notch1        | chr2:26457902-26516663    | 22.4684  | 19.9476  | -0.1717 | 0.652006 |
| Rapgef1       | chr2:29619719-29740978    | 35.6484  | 34.1520  | -0.0619 | 0.663595 |
| Coq4          | chr2:29787492-29797935    | 1.1702   | 1.4768   | 0.3358  | 0.487001 |



|               |                           |          |          |         |          |
|---------------|---------------------------|----------|----------|---------|----------|
| BC005624      | chr2:30972832-30982201    | 13.7979  | 15.1676  | 0.1365  | 0.450085 |
| Gm13818       | chr2:93794569-93795084    | 1.5101   | 0.7933   | -0.9287 | 0.592595 |
| Gm14048       | chr2:130880865-130882133  | 1.5787   | 2.3455   | 0.5712  | 0.487677 |
| Ptpn1         | chr2:167932056-167979385  | 38.8260  | 41.5251  | 0.0970  | 0.528651 |
| Crtc2         | chr3:90254162-90264125    | 5.7771   | 5.3403   | -0.1134 | 0.142110 |
| Mcl1          | chr3:95658720-95663176    | 230.7324 | 224.2674 | -0.0410 | 0.426881 |
| Pla2g12a      | chr3:129878621-129895821  | 7.4882   | 6.5278   | -0.1980 | 0.580489 |
| Gm26643       | chr4:43030998-43032482    | 4.9186   | 4.1145   | -0.2575 | 0.555074 |
| Zbtb8os       | chr4:129335694-129354547  | 3.2735   | 3.7551   | 0.1980  | 0.509219 |
| Sec61g        | chr11:16500529-16508484   | 1.1841   | 1.6863   | 0.5101  | 0.469132 |
| Clhc1         | chr11:29547949-29578367   | 0.8092   | 1.1946   | 0.5620  | 0.413952 |
| NA            | chr9:96747280-96752727    | 0.7065   | 0.4483   | -0.6564 | 0.447240 |
| Bend6         | chr1:33852051-33907816    | 0.8257   | 0.5329   | -0.6318 | 0.534437 |
| Gm1043        | chr5:37185896-37193023    | 0.2577   | 0.4547   | 0.8194  | 0.321477 |
| Ccdc79        | chr8:104446718-104509910  | 0.1003   | 0.2084   | 1.0558  | 0.601426 |
| Mir29c        | chr1:195037546-195037634  | 4.2675   | 7.9327   | 0.8944  | 0.394518 |
| Ptcd1         | chr5:145147513-145167108  | 16.2591  | 15.3192  | -0.0859 | 0.552413 |
| Mdfic         | chr6:15720660-15802165    | 11.3618  | 12.3161  | 0.1164  | 0.549151 |
| Zfp260        | chr7:30094776-30107622    | 26.0256  | 28.0969  | 0.1105  | 0.603489 |
| Gm10653       | chr9:62841476-62868000    | 2.9195   | 2.2618   | -0.3683 | 0.609245 |
| Faim          | chr9:98986372-99002018    | 27.2057  | 25.0449  | -0.1194 | 0.554529 |
| Ppic          | chr18:53406340-53418007   | 4.9134   | 4.2013   | -0.2259 | 0.329787 |
| Seh1l         | chr18:6774875-67795461    | 24.2123  | 22.7575  | -0.0894 | 0.660615 |
| Actr3b        | chr5:25759996-25850342    | 0.3384   | 0.5947   | 0.8132  | 0.422781 |
| Scgb3a1       | chr11:49663609-49665118   | 1.7570   | 0.9763   | -0.8478 | 0.408043 |
| Gm10135       | chr5:72965807-72974702    | 64.4776  | 71.9408  | 0.1580  | 0.129497 |
| Rpl37         | chr15:5116612-5119140     | 97.5836  | 116.6044 | 0.2569  | 0.539946 |
| Spice1        | chr16:44347120-44388497   | 6.2668   | 5.7906   | -0.1140 | 0.584669 |
| Tubb5         | chr17:35833925-35838306   | 343.6219 | 366.9364 | 0.0947  | 0.599404 |
| Rab32         | chr10:10545010-10558233   | 2.2601   | 2.8220   | 0.3203  | 0.533780 |
| Tk1           | chr11:117815525-117826092 | 5.9577   | 6.5648   | 0.1400  | 0.469625 |
| Hsd1l         | chr8:119561978-119575200  | 33.5807  | 31.7267  | -0.0819 | 0.653285 |
| Phf5a         | chr15:81865318-81871911   | 39.7934  | 44.0476  | 0.1465  | 0.561952 |
| Pmm1          | chr15:81951107-81960930   | 6.0349   | 5.4685   | -0.1422 | 0.434623 |
| Psmb5         | chr14:54614119-54617995   | 28.8511  | 26.6748  | -0.1132 | 0.403372 |
| Gm17103       | chr16:38569322-38573300   | 3.1620   | 4.4117   | 0.4805  | 0.555483 |
| 9530080011Rik | chr4:95959714-95967655    | 0.9130   | 1.2763   | 0.4833  | 0.520109 |
| Gm20645       | chr11:23736846-23740357   | 8.0343   | 8.9785   | 0.1603  | 0.583797 |
| Aebp2         | chr6:140622448-140678472  | 22.5982  | 24.0488  | 0.0898  | 0.404193 |
| Mst1          | chr9:108080435-108085027  | 5.0360   | 4.4107   | -0.1913 | 0.597318 |
| Gm20470       | chr10:7743519-7761099     | 47.6361  | 56.1576  | 0.2374  | 0.614057 |
| 4930519F09Rik | chr10:28880920-28923507   | 4.9432   | 4.0332   | -0.2935 | 0.638224 |
| Bend3         | chr10:43479139-43515396   | 2.8424   | 2.6037   | -0.1265 | 0.332924 |
| Nus1          | chr10:52417546-52440192   | 12.0042  | 11.1317  | -0.1089 | 0.706254 |
| Scamp4        | chr10:80602881-80615783   | 19.1612  | 17.7731  | -0.1085 | 0.602452 |
| Gna15         | chr10:81502305-81524225   | 13.8130  | 15.3669  | 0.1538  | 0.546255 |
| Aes           | chr10:81559493-81566362   | 195.8613 | 213.4164 | 0.1238  | 0.693319 |
| Tle6          | chr10:81590903-81601073   | 0.3046   | 0.1555   | -0.9707 | 0.554723 |
| 1190007I07Rik | chr10:82619850-82623196   | 8.1524   | 7.0257   | -0.2146 | 0.419859 |
| Ikkip         | chr10:91082939-91102607   | 1.9016   | 2.2333   | 0.2320  | 0.594908 |
| Cand1         | chr10:119199254-119240055 | 30.2664  | 29.2621  | -0.0487 | 0.544502 |
| Gli1          | chr10:127329888-127341589 | 3.7357   | 4.3070   | 0.2053  | 0.559906 |
| Gm11975       | chr11:6559022-6559503     | 2.5295   | 1.6233   | -0.6399 | 0.543454 |
| Akt2-ps       | chr11:16514532-16515981   | 2.9548   | 2.1813   | -0.4379 | 0.647195 |
| Chac2         | chr11:30976706-30986350   | 2.8712   | 2.3074   | -0.3154 | 0.550947 |
| Nsg2          | chr11:32000462-32059202   | 56.8439  | 53.3538  | -0.0914 | 0.747854 |
| Gm16034       | chr11:46143896-46145014   | 29.0393  | 26.0078  | -0.1591 | 0.500561 |
| 4930412M03Rik | chr11:60112218-60115230   | 6.4811   | 5.4679   | -0.2452 | 0.647104 |
| Gsg2          | chr11:73135484-73138294   | 10.4839  | 11.8022  | 0.1709  | 0.627548 |
| Gm26836       | chr11:75745071-75761195   | 4.8881   | 4.2018   | -0.2183 | 0.533169 |
| Traf4         | chr11:78158498-78165589   | 9.3431   | 8.5267   | -0.1319 | 0.687504 |
| Rab11fip4     | chr11:79591211-79698023   | 17.8532  | 19.3206  | 0.1140  | 0.616399 |
| Sfn10-ps      | chr11:83028129-83040042   | 12.1840  | 11.2690  | -0.1126 | 0.645228 |
| Ppm1d         | chr11:85311243-85347066   | 14.3309  | 13.5112  | -0.0850 | 0.448278 |
| C030037D09Rik | chr11:88718644-88728893   | 0.7572   | 0.5694   | -0.4114 | 0.582129 |
| Nme2          | chr11:93949813-93956259   | 42.7899  | 48.3431  | 0.1760  | 0.678428 |
| 4833417C18Rik | chr11:95858864-95861044   | 2.5065   | 1.9813   | -0.3392 | 0.496201 |
| Gm11613       | chr11:97644183-97660367   | 1.6685   | 2.0970   | 0.3298  | 0.438721 |
| Psmc3         | chr11:98682553-98695979   | 20.9328  | 19.9195  | -0.0716 | 0.642358 |
| Ifi35         | chr11:101448406-101458698 | 53.0588  | 50.4708  | -0.0721 | 0.626129 |
| Cep112os2     | chr11:108820332-108826942 | 0.0921   | 0.1575   | 0.7739  | 0.338013 |

|               |                           |          |          |         |          |
|---------------|---------------------------|----------|----------|---------|----------|
| Wbp2          | chr11:116078572-116086995 | 11.0945  | 12.1295  | 0.1287  | 0.496534 |
| 1810043H04Rik | chr11:120098927-120100704 | 10.2869  | 12.6147  | 0.2943  | 0.601367 |
| BC017643      | chr11:121222587-121229322 | 24.2263  | 23.3118  | -0.0555 | 0.175609 |
| Gm26517       | chr12:51888014-51889459   | 6.6381   | 7.8860   | 0.2485  | 0.528306 |
| Insm2         | chr12:55598916-55602018   | 0.1356   | 0.2602   | 0.9408  | 0.553038 |
| D130020L05Rik | chr12:101082480-101088927 | 16.7900  | 15.3868  | -0.1259 | 0.682469 |
| Ccnk          | chr12:108179737-108203359 | 7.2734   | 6.4883   | -0.1648 | 0.676649 |
| Abt1          | chr13:23421538-23423866   | 17.4692  | 16.1012  | -0.1176 | 0.493442 |
| Nqo2          | chr13:33964658-33988465   | 3.5144   | 3.1862   | -0.1414 | 0.379036 |
| Txncd5        | chr13:38500272-38528824   | 21.9544  | 23.6235  | 0.1057  | 0.523281 |
| Zfp346        | chr13:55105310-55134825   | 8.2791   | 7.7073   | -0.1032 | 0.574677 |
| Caml          | chr13:55623004-55632411   | 13.4404  | 15.0576  | 0.1639  | 0.553253 |
| Erap1         | chr13:74639871-74691875   | 70.0701  | 74.1570  | 0.0818  | 0.456290 |
| Kif2a         | chr13:106958995-107022126 | 7.4263   | 6.9028   | -0.1055 | 0.629972 |
| Orc5          | chr5:22486484-22550429    | 16.6447  | 18.1673  | 0.1263  | 0.572529 |
| Arap2         | chr5:62602444-62766198    | 29.6853  | 28.6466  | -0.0514 | 0.601015 |
| Uba6          | chr5:86110719-86172803    | 15.5865  | 16.7895  | 0.1073  | 0.577701 |
| Hnrnpdl       | chr5:100033576-100039664  | 75.8894  | 72.9959  | -0.0561 | 0.684187 |
| Snord21       | chr5:107904554-107904648  | 79.3325  | 65.9899  | -0.2657 | 0.612962 |
| Dr1           | chr5:108268896-108280526  | 26.1807  | 28.3321  | 0.1139  | 0.564443 |
| Gm13789       | chr5:114363414-114365357  | 23.4042  | 26.5261  | 0.1806  | 0.560972 |
| Acad10        | chr5:121621025-121660514  | 1.7600   | 2.0643   | 0.2301  | 0.600237 |
| Abcb9         | chr5:124061529-124095798  | 9.0295   | 9.9549   | 0.1408  | 0.575129 |
| Mospd3        | chr5:137596644-137601058  | 1.6112   | 2.0105   | 0.3194  | 0.157381 |
| Sun1          | chr5:139200636-139249840  | 15.9410  | 15.2777  | -0.0613 | 0.580817 |
| 3110082I17Rik | chr5:139359738-139460502  | 6.5538   | 5.6347   | -0.2180 | 0.594734 |
| Tmem184a      | chr5:139802484-139819917  | 1.1610   | 0.9760   | -0.2504 | 0.452514 |
| Usp42         | chr5:143710324-143732280  | 7.2088   | 6.6144   | -0.1242 | 0.722823 |
| Pdap1         | chr5:145128768-145140238  | 27.7382  | 25.7659  | -0.1064 | 0.697842 |
| Podxl         | chr6:31519487-31563981    | 0.5395   | 0.4314   | -0.3226 | 0.239556 |
| 3110062M04Rik | chr6:34871770-34878060    | 8.1091   | 9.0171   | 0.1531  | 0.568102 |
| Gm15863       | chr6:54635188-54643350    | 0.2773   | 0.4184   | 0.5934  | 0.519923 |
| Abcg2         | chr6:58584522-58692869    | 2.2414   | 2.6235   | 0.2271  | 0.633315 |
| Il12rb2       | chr6:67291317-67376188    | 3.2316   | 2.8539   | -0.1793 | 0.555595 |
| Gm15612       | chr6:88842853-88847274    | 0.8024   | 0.6099   | -0.3959 | 0.425361 |
| Ogg1          | chr6:113326971-113335068  | 6.9037   | 5.9304   | -0.2192 | 0.670144 |
| Leprel2       | chr6:124841088-124857752  | 0.1267   | 0.2211   | 0.8033  | 0.535851 |
| Loh12cr1      | chr6:134639626-134711184  | 6.3678   | 7.2741   | 0.1920  | 0.394995 |
| Mettl20       | chr6:149139848-149151171  | 17.5081  | 16.3658  | -0.0973 | 0.571918 |
| Zfp606        | chr7:12478292-12496235    | 3.6957   | 3.3997   | -0.1205 | 0.592086 |
| D930028M14Rik | chr7:25152456-25156623    | 1.8986   | 2.6148   | 0.4617  | 0.560951 |
| Aplp1         | chr7:30434980-30445582    | 2.5196   | 3.0657   | 0.2831  | 0.543649 |
| Peptd         | chr7:34912378-35044710    | 12.8181  | 11.8627  | -0.1118 | 0.643752 |
| Lrp3          | chr7:35200026-35215370    | 0.7924   | 0.9852   | 0.3141  | 0.522674 |
| AI987944      | chr7:41373771-41393260    | 21.7817  | 23.8091  | 0.1284  | 0.508977 |
| Ctu1          | chr7:43672015-43678298    | 5.2788   | 6.0752   | 0.2027  | 0.485654 |
| Prrg2         | chr7:45053612-45062677    | 2.0077   | 1.5584   | -0.3655 | 0.685637 |
| Nav2          | chr7:49246188-49610087    | 1.6486   | 2.1856   | 0.4067  | 0.602658 |
| Atp10a        | chr7:58658201-58829426    | 19.7265  | 21.1822  | 0.1027  | 0.525907 |
| Fah           | chr7:84585158-84606722    | 3.3722   | 4.0024   | 0.2472  | 0.484593 |
| l7Rn6         | chr7:89917528-89941199    | 5.9495   | 6.9321   | 0.2205  | 0.575939 |
| Gm9905        | chr7:121033251-121035096  | 2.2342   | 1.8323   | -0.2861 | 0.410584 |
| Rabep2        | chr7:126428758-126449245  | 10.9768  | 10.2011  | -0.1057 | 0.695185 |
| Ppp4c         | chr7:126785906-126792471  | 121.9165 | 130.3023 | 0.0960  | 0.550711 |
| Hsd3b7        | chr7:127785607-127803802  | 4.9713   | 4.6437   | -0.0983 | 0.279531 |
| Bckdk         | chr7:127904081-127909664  | 15.9039  | 17.2016  | 0.1132  | 0.425733 |
| Inpp5f        | chr7:128611327-128696425  | 19.8117  | 19.0339  | -0.0578 | 0.575277 |
| 9430038I01Rik | chr7:137375573-137410762  | 1.1898   | 1.4299   | 0.2651  | 0.543448 |
| Bag4          | chr8:25764537-25785209    | 8.5305   | 9.3870   | 0.1380  | 0.522432 |
| Rnf122        | chr8:31111819-31131482    | 2.0933   | 1.8370   | -0.1884 | 0.672236 |
| Lonrf1        | chr8:36216063-36249516    | 0.5960   | 0.8045   | 0.4327  | 0.538197 |
| Mau2          | chr8:70016122-70042734    | 44.9009  | 43.3702  | -0.0500 | 0.593365 |
| Smad1         | chr8:79338394-79399518    | 2.9997   | 2.7458   | -0.1276 | 0.352600 |
| Coq9          | chr8:94838320-94854895    | 12.2736  | 11.4325  | -0.1024 | 0.566221 |
| Mlycd         | chr8:119394877-119411102  | 4.9700   | 5.7050   | 0.1990  | 0.590585 |
| Cotl1         | chr8:119809224-119840579  | 277.0100 | 298.1611 | 0.1062  | 0.665938 |
| Gm20406       | chr8:121806414-121807369  | 4.9284   | 6.4772   | 0.3942  | 0.410276 |
| Cep295        | chr9:15316914-15357788    | 12.0456  | 11.5084  | -0.0658 | 0.625864 |
| Eif3g         | chr9:20894351-20898600    | 109.8409 | 102.3741 | -0.1016 | 0.737232 |
| Siae          | chr9:37613846-37648318    | 6.7116   | 7.4185   | 0.1445  | 0.359805 |
| Kdelc2        | chr9:53384022-53401867    | 2.1745   | 2.5168   | 0.2109  | 0.342343 |

|               |                           |          |          |         |          |
|---------------|---------------------------|----------|----------|---------|----------|
| Ireb2         | chr9:54863754-54912534    | 12.4252  | 11.4813  | -0.1140 | 0.734274 |
| Map2k5        | chr9:63163768-63377902    | 12.5207  | 11.4849  | -0.1246 | 0.633031 |
| Dyx1c1Cpgp1   | chr9:72958851-73016319    | 17.6502  | 19.1601  | 0.1184  | 0.519542 |
| Myo5a         | chr9:75071014-75223688    | 5.9012   | 5.5676   | -0.0840 | 0.641778 |
| Srprb         | chr9:103188032-103202137  | 10.6828  | 11.5453  | 0.1120  | 0.296200 |
| Gm17041       | chr9:107300379-107301838  | 49.7645  | 56.4098  | 0.1808  | 0.626669 |
| A730085K08Rik | chr9:122380574-122398801  | 1.2753   | 0.9784   | -0.3824 | 0.429028 |
| Tcaim         | chr9:122805538-122836334  | 8.6853   | 7.8683   | -0.1425 | 0.675265 |
| Tfe3          | chrX:7762559-7775202      | 4.0365   | 3.6438   | -0.1477 | 0.739871 |
| Rap2c         | chrX:51003911-51018018    | 23.1204  | 24.8408  | 0.1036  | 0.447544 |
| Phf6          | chrX:52912265-52956943    | 16.7348  | 17.9865  | 0.1041  | 0.555178 |
| Zxdb          | chrX:94724568-94730191    | 2.7622   | 2.4382   | -0.1800 | 0.672575 |
| Arr3          | chrX:100605496-100618493  | 0.1666   | 0.3140   | 0.9140  | 0.458549 |
| Zmym3         | chrX:101404383-101420849  | 8.3239   | 7.8856   | -0.0780 | 0.541165 |
| Nhs12         | chrX:101849384-102092055  | 0.5879   | 0.7354   | 0.3229  | 0.594399 |
| Armcx4        | chrX:134686518-134696757  | 1.3887   | 1.7073   | 0.2980  | 0.602887 |
| Acot9         | chrX:155262442-155297654  | 25.6080  | 27.6005  | 0.1081  | 0.343081 |
| Rbbp7         | chrX:162760401-162779092  | 59.6131  | 57.5606  | -0.0505 | 0.426343 |
| Hrsp12        | chr15:34484020-34495255   | 3.5265   | 4.1803   | 0.2454  | 0.612919 |
| Slc45a4       | chr15:73577423-73645762   | 6.2424   | 5.7173   | -0.1268 | 0.749130 |
| Them6         | chr15:74721233-74724373   | 7.6033   | 6.6994   | -0.1826 | 0.550982 |
| Eif3l         | chr15:79075222-79094400   | 122.4289 | 117.0620 | -0.0647 | 0.689687 |
| Fam83f        | chr15:80671846-80700420   | 0.2640   | 0.4160   | 0.6563  | 0.461400 |
| 1700001L05Rik | chr15:83357525-83367282   | 1.5197   | 1.1185   | -0.4422 | 0.632766 |
| Trabd         | chr15:89075123-89087077   | 18.1477  | 19.5738  | 0.1091  | 0.534405 |
| Senp1         | chr15:98038743-98093744   | 11.7317  | 11.2355  | -0.0623 | 0.571018 |
| Snora2b       | chr15:98526345-98526482   | 5.9396   | 3.1625   | -0.9093 | 0.576215 |
| Arf3          | chr15:98737620-98763214   | 43.4019  | 41.6730  | -0.0586 | 0.622551 |
| Tkt           | chr14:30548358-30574722   | 66.8086  | 64.2696  | -0.0559 | 0.696445 |
| Gm23946       | chr14:32191853-32192050   | 20.0887  | 26.7004  | 0.4105  | 0.655694 |
| Syt15         | chr14:34219594-34230421   | 0.1974   | 0.1175   | -0.7488 | 0.532663 |
| Ero1l         | chr14:45283091-45318572   | 9.4485   | 10.2771  | 0.1213  | 0.469291 |
| Ktn1          | chr14:47663755-47736563   | 24.0980  | 22.8794  | -0.0749 | 0.675314 |
| Trav14d-3-dv8 | chr14:53078579-53079045   | 7.5104   | 5.0776   | -0.5648 | 0.655085 |
| Trav7-6       | chr14:53716715-53717290   | 9.1108   | 6.0079   | -0.6007 | 0.696048 |
| Traj22        | chr14:54197247-54197307   | 200.6886 | 180.4267 | -0.1535 | 0.299793 |
| Rnf31         | chr14:55591707-55603693   | 17.5279  | 19.1052  | 0.1243  | 0.619494 |
| MsrA          | chr14:64122622-64455903   | 8.4804   | 7.5999   | -0.1581 | 0.549793 |
| Uchl3         | chr14:101653966-101696124 | 22.0424  | 20.0121  | -0.1394 | 0.561453 |
| Mir5125       | chr17:23823290-23823369   | 21.9839  | 15.3817  | -0.5152 | 0.499448 |
| Fkbp5         | chr17:28399094-28517524   | 16.5187  | 17.8222  | 0.1096  | 0.601433 |
| Tbc1d22b      | chr17:29549787-29606895   | 10.7061  | 9.9289   | -0.1087 | 0.701511 |
| Cd320         | chr17:33843090-33849774   | 3.9915   | 4.5714   | 0.1957  | 0.331359 |
| BC051226      | chr17:33908181-33909317   | 6.3333   | 7.6116   | 0.2653  | 0.487769 |
| Ring1         | chr17:34020791-34024680   | 8.4915   | 7.8260   | -0.1178 | 0.516673 |
| Btn17-ps      | chr17:34532876-34547651   | 2.6645   | 3.2354   | 0.2801  | 0.400482 |
| Ppp1r11       | chr17:36948355-36951741   | 33.5434  | 36.4685  | 0.1206  | 0.548774 |
| Tnfrsf21      | chr17:43016554-43089188   | 0.6716   | 0.4236   | -0.6648 | 0.554236 |
| Slc25a27      | chr17:43641899-43667015   | 3.5642   | 2.9900   | -0.2534 | 0.672601 |
| Cul7          | chr17:46650336-46664364   | 2.4588   | 2.7954   | 0.1851  | 0.610311 |
| Rftn1         | chr17:49992256-50190674   | 32.5805  | 31.2937  | -0.0581 | 0.579169 |
| Ehd3          | chr17:73804840-73832093   | 24.2199  | 23.0910  | -0.0689 | 0.573694 |
| Cdc42ep3      | chr17:79334024-79355091   | 14.2240  | 15.6614  | 0.1389  | 0.398088 |
| Srsf7         | chr17:80200088-80207305   | 90.3783  | 86.7876  | -0.0585 | 0.615253 |
| Gm15835       | chr16:4777742-4779454     | 3.0771   | 1.7662   | -0.8010 | 0.424625 |
| 3110001I22Rik | chr16:13671928-13678405   | 8.6788   | 9.9249   | 0.1936  | 0.569989 |
| Nde1          | chr16:14163274-14192928   | 31.9933  | 30.4236  | -0.0726 | 0.592495 |
| Ydjc          | chr16:17144620-17160701   | 3.6824   | 3.3468   | -0.1379 | 0.567006 |
| Ufd1l         | chr16:18811778-18835261   | 15.5516  | 16.7778  | 0.1095  | 0.444077 |
| Mrpl40        | chr16:18872017-18876767   | 32.5207  | 36.0204  | 0.1475  | 0.575909 |
| 0610012G03Rik | chr16:31948023-31948448   | 18.3441  | 15.7105  | -0.2236 | 0.590189 |
| 1700021K19Rik | chr16:32821702-32877766   | 5.7531   | 5.3814   | -0.0964 | 0.582483 |
| Tigit         | chr16:43648860-43664184   | 23.7510  | 27.4132  | 0.2069  | 0.625179 |
| Gm608         | chr16:44173245-44227465   | 7.6740   | 7.1113   | -0.1099 | 0.756334 |
| Pcnp          | chr16:56007244-56029739   | 15.3944  | 16.8571  | 0.1309  | 0.508843 |
| Ap5b1         | chr19:5568073-5571261     | 12.7781  | 11.5178  | -0.1498 | 0.704627 |
| Fau           | chr19:6057887-6059524     | 13.4617  | 11.9845  | -0.1677 | 0.439753 |
| Men1          | chr19:6334978-6340891     | 14.3591  | 13.5458  | -0.0841 | 0.538811 |
| Pdlim1        | chr19:40221172-40271842   | 3.8275   | 3.4712   | -0.1410 | 0.586652 |
| Ccnj          | chr19:40831278-40848572   | 4.2729   | 4.8855   | 0.1933  | 0.584294 |
| Hps1          | chr19:42755104-42779978   | 6.3875   | 7.0405   | 0.1404  | 0.485853 |

|          |                          |          |          |         |          |
|----------|--------------------------|----------|----------|---------|----------|
| Smap1    | chr1:23844845-23922317   | 24.4089  | 26.1791  | 0.1010  | 0.397517 |
| Ankrd39  | chr1:36538172-36547201   | 8.2879   | 9.2791   | 0.1630  | 0.325603 |
| Chst10   | chr1:38863876-38898160   | 7.0175   | 7.7994   | 0.1524  | 0.461591 |
| Gm16894  | chr1:40076227-40085853   | 3.7390   | 2.7709   | -0.4323 | 0.659184 |
| Wdr75    | chr1:45795165-45823619   | 25.0174  | 23.0682  | -0.1170 | 0.741471 |
| NA       | chr1:55335366-55335883   | 1.9672   | 2.9544   | 0.5867  | 0.513097 |
| Fam126b  | chr1:58522805-58586323   | 7.2172   | 6.7066   | -0.1059 | 0.702719 |
| Tmem198  | chr1:75479531-75485705   | 1.3748   | 1.1070   | -0.3125 | 0.344866 |
| Ncl      | chr1:86344718-86359455   | 36.8885  | 34.9445  | -0.0781 | 0.738712 |
| Sept2    | chr1:93478963-93510260   | 33.3577  | 35.8351  | 0.1034  | 0.594189 |
| Gm26280  | chr1:135150665-135150766 | 8.0430   | 3.9968   | -1.0089 | 0.596575 |
| Xcl1     | chr1:164931643-164935527 | 12.1716  | 14.8352  | 0.2855  | 0.520964 |
| Ppox     | chr1:171275989-171281186 | 10.6812  | 11.5874  | 0.1175  | 0.402895 |
| Exo1     | chr1:175880777-175911396 | 2.7177   | 3.0980   | 0.1890  | 0.533388 |
| Cnih4    | chr1:181150930-181168994 | 8.2629   | 9.0577   | 0.1325  | 0.406326 |
| Kctd3    | chr1:188971097-189007840 | 6.1287   | 5.6677   | -0.1128 | 0.324024 |
| Tatdn3   | chr1:191045825-191062932 | 4.5358   | 5.1586   | 0.1856  | 0.420515 |
| Traf3ip3 | chr1:193175505-193201703 | 101.0257 | 98.1261  | -0.0420 | 0.462419 |
| Lamb3    | chr1:193301956-193343878 | 1.7159   | 2.0084   | 0.2271  | 0.435052 |
| Cr2      | chr1:195136810-195176715 | 0.8316   | 0.6663   | -0.3197 | 0.612779 |
| Ankrd29  | chr18:12252361-12305720  | 1.7156   | 1.3728   | -0.3215 | 0.635888 |
| Tmem173  | chr18:35733677-35740554  | 91.6043  | 87.0700  | -0.0732 | 0.732992 |
| Cxc5     | chr18:35829817-35861687  | 2.0166   | 1.6078   | -0.3268 | 0.555856 |
| Gm15337  | chr18:39367037-39389425  | 0.7328   | 0.5434   | -0.4312 | 0.599216 |
| Tshz1    | chr18:84011626-84086404  | 11.6035  | 10.9223  | -0.0873 | 0.628009 |
| Cubn     | chr2:13276337-13491924   | 0.1818   | 0.1358   | -0.4211 | 0.484253 |
| Acbd5    | chr2:23068167-23114510   | 14.2337  | 15.4957  | 0.1226  | 0.550607 |
| Gm23865  | chr2:29931426-29931523   | 22.2233  | 28.8743  | 0.3777  | 0.339268 |
| D2Wsu81e | chr2:30173446-30178459   | 8.2934   | 9.2854   | 0.1630  | 0.546897 |
| Prrc2b   | chr2:32151081-32234537   | 23.9028  | 22.2953  | -0.1004 | 0.773017 |
| Rbm18    | chr2:36116078-36136773   | 7.9021   | 7.3647   | -0.1016 | 0.629568 |
| Gm13477  | chr2:44788264-44790951   | 1.8089   | 1.5086   | -0.2619 | 0.430978 |
| Phospho2 | chr2:69789622-69800005   | 9.8525   | 10.8725  | 0.1421  | 0.592472 |
| Gm13684  | chr2:83737781-83759865   | 1.9729   | 2.4658   | 0.3217  | 0.627162 |
| Mtch2    | chr2:90847154-90866810   | 9.5668   | 10.2940  | 0.1057  | 0.424629 |
| Dph6     | chr2:114516415-114654964 | 2.8895   | 2.6031   | -0.1506 | 0.647323 |
| Tmem87a  | chr2:120355311-120404113 | 19.4375  | 20.8453  | 0.1009  | 0.543147 |
| Trp53bp1 | chr2:121193280-121271407 | 12.6596  | 12.2329  | -0.0495 | 0.488847 |
| Duox1    | chr2:122315671-122347972 | 0.3081   | 0.2215   | -0.4763 | 0.427455 |
| Itpril1  | chr2:127138771-127143442 | 12.1222  | 13.3063  | 0.1345  | 0.583560 |
| Ubox5    | chr2:130590001-130630038 | 5.9766   | 6.5762   | 0.1379  | 0.503499 |
| Mcm8     | chr2:132816140-132844197 | 2.9353   | 2.6264   | -0.1604 | 0.153920 |
| Tm9sf4   | chr2:153161302-153210466 | 6.5732   | 7.1325   | 0.1178  | 0.473664 |
| Cdk5rap1 | chr2:154335379-154373010 | 6.4485   | 7.2535   | 0.1697  | 0.560055 |
| BC029722 | chr2:155817729-155819426 | 15.2292  | 14.0311  | -0.1182 | 0.502075 |
| Actr5    | chr2:158624887-158639211 | 9.9142   | 9.1810   | -0.1108 | 0.641787 |
| Helz2    | chr2:181227614-181242027 | 28.5758  | 26.9238  | -0.0859 | 0.770791 |
| E2f5     | chr3:14578670-14606308   | 8.1468   | 9.4947   | 0.2209  | 0.630468 |
| Prkci    | chr3:30995746-31052741   | 4.4816   | 4.0901   | -0.1319 | 0.612249 |
| Acad9    | chr3:36065978-36094944   | 6.8443   | 6.4965   | -0.0753 | 0.474140 |
| NA       | chr3:40950630-40977793   | 36.4959  | 39.2855  | 0.1063  | 0.318269 |
| Elf2     | chr3:51255664-51340644   | 40.2282  | 42.7460  | 0.0876  | 0.295672 |
| Setd7    | chr3:51515318-51560878   | 16.8173  | 15.9941  | -0.0724 | 0.626340 |
| Gm16206  | chr3:53452618-53457797   | 2.1484   | 2.6595   | 0.3079  | 0.483260 |
| Gm20689  | chr3:68900170-68900449   | 6.7190   | 8.7597   | 0.3826  | 0.303173 |
| Trim2    | chr3:84160438-84305446   | 0.4039   | 0.4917   | 0.2839  | 0.588967 |
| Lrba     | chr3:86224689-86782693   | 53.2361  | 57.4481  | 0.1099  | 0.661597 |
| Fcrl1    | chr3:87376386-87392133   | 1.9599   | 2.4456   | 0.3194  | 0.600521 |
| Iqgap3   | chr3:88082050-88121048   | 1.5497   | 1.8284   | 0.2386  | 0.591008 |
| Cdc42se1 | chr3:95228731-95236409   | 104.9276 | 110.4234 | 0.0737  | 0.314934 |
| Bnpl     | chr3:95241270-95251193   | 0.9152   | 0.6451   | -0.5044 | 0.657567 |
| Golph3l  | chr3:95588933-95619247   | 23.2212  | 24.8639  | 0.0986  | 0.281180 |
| Mir186   | chr3:157544278-157544349 | 12.6443  | 7.0447   | -0.8439 | 0.590226 |
| NA       | chr4:6445037-6447912     | 5.3156   | 4.6470   | -0.1939 | 0.659448 |
| Fsbp     | chr4:11579664-11587591   | 0.8229   | 0.6484   | -0.3439 | 0.510274 |
| Pigo     | chr4:43017634-43025819   | 7.1504   | 7.8437   | 0.1335  | 0.417108 |
| Tle1     | chr4:72117141-72200919   | 0.8618   | 1.0120   | 0.2316  | 0.499564 |
| Slc35d1  | chr4:103170648-103215164 | 6.0914   | 5.5571   | -0.1325 | 0.647838 |
| Osbp19   | chr4:109061144-109202272 | 20.6710  | 21.9580  | 0.0871  | 0.399616 |
| Faf1     | chr4:109676587-109963960 | 16.4397  | 15.4183  | -0.0925 | 0.695851 |
| Atfaf1   | chr4:115784811-115818828 | 1.8531   | 1.5108   | -0.2946 | 0.579849 |

|               |                           |          |          |         |          |
|---------------|---------------------------|----------|----------|---------|----------|
| Gm12953       | chr4:116551739-116552627  | 1.5603   | 2.2416   | 0.5227  | 0.478441 |
| Atp6v0b       | chr4:117884325-117887333  | 24.2216  | 22.6709  | -0.0955 | 0.633172 |
| Tmem222       | chr4:133266044-133277792  | 20.5468  | 19.0467  | -0.1094 | 0.644458 |
| Ldrlap1       | chr4:134744734-134768024  | 13.1161  | 14.2275  | 0.1173  | 0.497323 |
| Gm12990       | chr4:135403188-135403656  | 2.3325   | 1.4588   | -0.6771 | 0.546988 |
| Gm24362       | chr4:136018070-136018486  | 2.4915   | 4.1618   | 0.7402  | 0.491008 |
| Rpl11         | chr4:136028264-136053428  | 9.8662   | 8.7803   | -0.1682 | 0.697891 |
| Plekhn2       | chr4:141625733-141664899  | 6.1802   | 5.5578   | -0.1531 | 0.718713 |
| NA            | chr4:155409189-155447944  | 1.0806   | 0.5801   | -0.8976 | 0.585683 |
| Ptprk         | chr10:28074819-28597397   | 0.1522   | 0.0771   | -0.9818 | 0.600986 |
| Unc79         | chr12:102948858-103184065 | 0.0240   | 0.0509   | 1.0810  | 0.537935 |
| Gm11398       | chr13:23620729-23621049   | 2.7590   | 4.3000   | 0.6402  | 0.424641 |
| Nos1          | chr5:117781031-117958840  | 0.0535   | 0.0965   | 0.8523  | 0.485026 |
| Mir1839       | chr7:81529854-81529981    | 13.2482  | 8.6018   | -0.6231 | 0.608441 |
| 2510046G10Rik | chr7:126649222-126649570  | 5.4209   | 7.9241   | 0.5477  | 0.508449 |
| Gm7418        | chr8:94835716-94836517    | 1.9821   | 1.3532   | -0.5506 | 0.578219 |
| 2700012I20Rik | chr9:57075215-57076013    | 2.7709   | 4.1084   | 0.5682  | 0.538899 |
| Gm23136       | chr9:64176660-64176759    | 5.1765   | 9.7172   | 0.9085  | 0.576088 |
| Gm15232       | chrX:167088092-167102090  | 2.0397   | 3.4047   | 0.7391  | 0.205642 |
| Trav6n-6      | chr14:53132850-53133137   | 2.9326   | 4.8336   | 0.7209  | 0.529357 |
| C4a           | chr17:34809091-34823464   | 0.0990   | 0.1627   | 0.7167  | 0.385548 |
| Gm17203       | chr19:59896240-59901062   | 0.3623   | 0.5579   | 0.6227  | 0.580134 |
| Gm26348       | chr1:10166538-10166778    | 6.5564   | 4.3377   | -0.5960 | 0.579682 |
| Mpp4          | chr1:59120935-59163389    | 0.5725   | 0.8405   | 0.5539  | 0.502757 |
| Gm15675       | chr1:130429780-130437191  | 3.2833   | 1.8929   | -0.7945 | 0.462441 |
| Atp6v1g3      | chr1:138273737-138289460  | 1.6157   | 1.1471   | -0.4942 | 0.600167 |
| Gm14326       | chr2:177935992-177957297  | 0.6858   | 0.9845   | 0.5217  | 0.363324 |
| Adad1         | chr3:37063526-37121924    | 0.1912   | 0.3445   | 0.8495  | 0.549782 |
| Gm22247       | chr4:46495154-46495285    | 3.2601   | 6.1012   | 0.9042  | 0.382126 |
| Armc2         | chr10:41914989-42018442   | 0.2330   | 0.3458   | 0.5698  | 0.604406 |
| Tns3          | chr11:8431651-8664535     | 0.0690   | 0.0370   | -0.9002 | 0.489234 |
| Lrrn4         | chr2:132868304-132880891  | 0.2054   | 0.3753   | 0.8694  | 0.567108 |
| Lpar3         | chr3:146220960-146286214  | 0.2950   | 0.5287   | 0.8415  | 0.489207 |
| Gm12630       | chr4:86817793-86818577    | 0.6933   | 1.1555   | 0.7370  | 0.519787 |
| Cdc37         | chr9:21138540-21149906    | 66.8630  | 62.8977  | -0.0882 | 0.734327 |
| Nfyb          | chr10:82748700-82764144   | 15.3157  | 16.4366  | 0.1019  | 0.413826 |
| Cggbp1        | chr16:64851995-64859507   | 46.4958  | 44.9075  | -0.0501 | 0.578468 |
| Bad           | chr19:6941860-6951898     | 7.4720   | 8.5146   | 0.1884  | 0.491749 |
| Gm5822        | chr19:28862329-28863707   | 1.6550   | 2.0920   | 0.3381  | 0.100001 |
| Tmem199       | chr11:78507054-78512172   | 13.6207  | 12.5607  | -0.1169 | 0.538214 |
| Ubl7          | chr9:57910985-57929968    | 19.2022  | 17.3662  | -0.1450 | 0.665801 |
| Aldh18a1      | chr19:40550256-40588463   | 27.1314  | 28.9287  | 0.0925  | 0.423098 |
| Sepsecs       | chr5:52640086-52669729    | 4.9927   | 5.6700   | 0.1835  | 0.647321 |
| Dync2h1       | chr9:6928502-7184446      | 2.9527   | 2.7892   | -0.0822 | 0.488592 |
| Nedd4         | chr9:72662556-72749842    | 1.9830   | 2.3035   | 0.2161  | 0.612085 |
| Cramp1l       | chr17:24961227-25015230   | 5.2930   | 4.8629   | -0.1223 | 0.721520 |
| Gm17275       | chr1:180802567-180809483  | 16.3827  | 17.8972  | 0.1276  | 0.542688 |
| Prune2        | chr19:16956117-17223932   | 0.0335   | 0.0582   | 0.7982  | 0.407999 |
| 5730416F02Rik | chrX:109001484-109002296  | 1.0447   | 0.5740   | -0.8640 | 0.576077 |
| Slc25a51      | chr4:45395922-45408766    | 14.9320  | 14.1858  | -0.0740 | 0.606977 |
| Ptdss1        | chr13:66932829-66998401   | 27.9252  | 29.8673  | 0.0970  | 0.473358 |
| St3gal4       | chr9:35046578-35116810    | 25.3156  | 23.8321  | -0.0871 | 0.591383 |
| Expn5         | chr9:53301669-53377514    | 0.6954   | 0.8211   | 0.2396  | 0.535387 |
| Zc3h3         | chr15:75754431-75841915   | 0.6010   | 0.4555   | -0.3999 | 0.389844 |
| NA            | chr17:27565111-27566220   | 2.3902   | 1.7746   | -0.4296 | 0.517975 |
| Tcp11         | chr17:28066746-28080639   | 0.4291   | 0.2337   | -0.8769 | 0.483668 |
| NA            | chr1:160044583-160071509  | 69.2882  | 63.1626  | -0.1335 | 0.635220 |
| Ascl2         | chr7:142966821-142969264  | 0.4537   | 0.7343   | 0.6945  | 0.485601 |
| Rtn4ip1       | chr10:43901806-43947862   | 4.3253   | 3.9360   | -0.1360 | 0.188377 |
| Sp2           | chr11:96953339-96982959   | 3.2443   | 2.9106   | -0.1566 | 0.391974 |
| Mir3064       | chr11:106782692-106782759 | 312.1987 | 347.4755 | 0.1544  | 0.498725 |
| Lrwd1         | chr5:136122771-136136074  | 14.9655  | 14.1602  | -0.0798 | 0.697304 |
| Rmnd5a        | chr6:71388633-71440637    | 39.8136  | 38.2118  | -0.0592 | 0.677705 |
| Sh3gl3        | chr7:82173839-82307419    | 3.3368   | 3.7967   | 0.1863  | 0.576487 |
| C2cd3         | chr7:100372232-100470159  | 13.4160  | 12.7727  | -0.0709 | 0.673072 |
| Vac14         | chr8:110618637-110720396  | 18.4918  | 17.3824  | -0.0893 | 0.644155 |
| 4930520O04Rik | chr9:114368302-114377229  | 1.7816   | 1.5215   | -0.2277 | 0.559371 |
| Tspan6        | chrX:133891067-133898429  | 1.7505   | 1.3338   | -0.3923 | 0.609510 |
| Plcl1         | chr1:55406387-55751802    | 6.1817   | 5.5532   | -0.1547 | 0.669931 |
| Kif5b         | chr18:6201001-6242174     | 49.0996  | 47.4879  | -0.0481 | 0.642032 |
| Gpatch3       | chr4:133574744-133584243  | 7.9138   | 7.2170   | -0.1330 | 0.460198 |

|               |                           |         |         |         |          |
|---------------|---------------------------|---------|---------|---------|----------|
| Ccl6          | chr11:83587881-83593087   | 0.7303  | 0.4586  | -0.6713 | 0.596672 |
| 5830454E08Rik | chr9:120577345-120578072  | 3.3272  | 4.6928  | 0.4961  | 0.505969 |
| 4632427E13Rik | chr7:92734165-92741468    | 15.9823 | 17.1503 | 0.1018  | 0.542375 |
| Cycc          | chr6:50562562-50566538    | 3.3516  | 3.9337  | 0.2310  | 0.618260 |
| Fam83e        | chr7:45721211-45729492    | 0.2308  | 0.3641  | 0.6579  | 0.518906 |
| 9430069I07Rik | chr15:34349175-34356421   | 4.3041  | 6.3596  | 0.5632  | 0.449103 |
| Gm5898        | chr7:63542478-63544549    | 2.7190  | 2.3083  | -0.2362 | 0.453733 |
| A330035P11Rik | chr14:122103429-122106974 | 1.0371  | 1.3964  | 0.4291  | 0.612440 |
| Gal3st4       | chr5:138264920-138272840  | 1.7698  | 2.0983  | 0.2456  | 0.437757 |
| Cbx7          | chr15:79915806-79971119   | 38.5592 | 36.8404 | -0.0658 | 0.713826 |
| Rpl7l1        | chr17:46773906-46782656   | 42.5808 | 40.3576 | -0.0774 | 0.695398 |
| Smc3          | chr19:53600397-53645833   | 35.7723 | 38.1207 | 0.0917  | 0.526597 |
| Tbck          | chr3:132684143-132838506  | 14.6785 | 13.8031 | -0.0887 | 0.658246 |
| Col18a1       | chr10:77052177-77166548   | 0.2055  | 0.1237  | -0.7326 | 0.533570 |
| Aqp3          | chr4:41092721-41098183    | 1.1251  | 1.4756  | 0.3913  | 0.391342 |
| Susd1         | chr4:59314682-59438633    | 0.9022  | 1.2596  | 0.4815  | 0.630895 |
| Daam2         | chr17:49456021-49564337   | 0.3976  | 0.5248  | 0.4004  | 0.500538 |
| Plcg2         | chr8:117498290-117635140  | 0.9058  | 0.7154  | -0.3404 | 0.613759 |
| Cep19         | chr16:32099799-32108069   | 18.6790 | 20.3846 | 0.1261  | 0.417284 |
| Slc25a3       | chr10:91116573-91124059   | 48.8720 | 47.3266 | -0.0464 | 0.566907 |
| Gins2         | chr8:120578632-120589304  | 8.3554  | 7.8190  | -0.0957 | 0.510100 |
| Angptl6       | chr9:20873808-20879727    | 6.1158  | 5.4100  | -0.1769 | 0.473979 |
| Gm20503       | chr4:59003209-59041888    | 35.2215 | 39.4588 | 0.1639  | 0.679843 |
| Specc1        | chr11:61956778-62223013   | 0.3959  | 0.3311  | -0.2579 | 0.560533 |
| Tmem106b      | chr6:13069758-13089269    | 23.4310 | 24.7654 | 0.0799  | 0.294674 |
| Gm12932       | chr4:125082856-125084947  | 5.7580  | 4.5368  | -0.3439 | 0.543777 |
| Gm22884       | chr11:55482693-55482833   | 11.3172 | 16.5611 | 0.5493  | 0.602970 |
| Per1          | chr11:69095216-69109960   | 4.6749  | 4.2810  | -0.1270 | 0.662113 |
| Timm22        | chr11:76406951-76416292   | 7.9752  | 8.8174  | 0.1448  | 0.489775 |
| Axin2         | chr11:108920348-108950783 | 7.0782  | 7.8195  | 0.1437  | 0.597959 |
| Dnajc27       | chr12:4082573-4110612     | 6.9397  | 6.4996  | -0.0945 | 0.462540 |
| Dicer1        | chr12:104687741-104751952 | 22.4484 | 21.3010 | -0.0757 | 0.747697 |
| Grk4          | chr5:34660378-34755305    | 1.2931  | 1.0695  | -0.2739 | 0.664170 |
| Alkbh2        | chr5:114123925-114128218  | 6.3256  | 5.4697  | -0.2097 | 0.462725 |
| Rpl37rt       | chr5:115102921-115110268  | 6.5067  | 5.1981  | -0.3239 | 0.611521 |
| Aacs          | chr5:125475813-125517412  | 13.1504 | 12.4745 | -0.0761 | 0.417320 |
| 1110019D14Rik | chr6:13871525-14044373    | 1.5638  | 1.1036  | -0.5028 | 0.618198 |
| Arhgef5       | chr6:43265581-43289320    | 1.3717  | 1.5859  | 0.2093  | 0.626258 |
| Tigd2         | chr6:59208869-59212033    | 29.7944 | 31.8797 | 0.0976  | 0.456568 |
| Tmem43        | chr6:91473702-91488459    | 17.2869 | 18.8297 | 0.1233  | 0.566330 |
| Gm2788        | chr7:48877957-48886608    | 0.6352  | 0.9828  | 0.6298  | 0.531734 |
| Art2a-ps      | chr7:101552452-101560865  | 21.8870 | 25.2437 | 0.2058  | 0.647648 |
| Ddx49         | chr8:70292865-70302489    | 18.2527 | 19.5739 | 0.1008  | 0.232157 |
| Zc3h12c       | chr9:52111984-52168111    | 1.6838  | 1.4531  | -0.2127 | 0.630372 |
| Fam219b       | chr9:57537527-57543187    | 13.6726 | 12.7678 | -0.0988 | 0.623711 |
| Acad11        | chr9:104040661-104127463  | 4.4967  | 4.9974  | 0.1523  | 0.389472 |
| Gm2223        | chrX:33505651-33507010    | 0.8886  | 1.3118  | 0.5620  | 0.379770 |
| Ccser2        | chr14:36874935-36968777   | 20.7198 | 19.9716 | -0.0531 | 0.607975 |
| Gm26679       | chr14:120384262-120388985 | 5.1488  | 4.2561  | -0.2747 | 0.605183 |
| D930048G16Rik | chr17:23790703-23794241   | 2.2040  | 2.6430  | 0.2621  | 0.420959 |
| Gm16861       | chr16:4935047-4939585     | 4.2708  | 3.6060  | -0.2441 | 0.620604 |
| Sept5         | chr16:18621810-18629938   | 0.2322  | 0.3902  | 0.7489  | 0.437830 |
| Aamp          | chr1:74279839-74284738    | 59.4056 | 63.9135 | 0.1055  | 0.579225 |
| Qsox1         | chr1:155778154-155812883  | 9.8576  | 10.6117 | 0.1064  | 0.474654 |
| Gm2962        | chr1:170925308-170925644  | 4.5819  | 2.6868  | -0.7701 | 0.634382 |
| Tor1b         | chr2:30952958-30959015    | 22.8808 | 22.0241 | -0.0551 | 0.486745 |
| Eif3i         | chr4:129591959-129600648  | 43.4698 | 47.3732 | 0.1241  | 0.662122 |
| Ubxn11        | chr4:134102569-134127593  | 19.8563 | 21.5913 | 0.1209  | 0.624266 |
| Akr7a5        | chr4:139310743-139318426  | 4.5714  | 5.4096  | 0.2429  | 0.604521 |
| Fbxo39        | chr11:72314443-72319416   | 0.2126  | 0.4328  | 1.0254  | 0.513984 |
| Nthl1         | chr17:24632681-24638838   | 1.8275  | 2.4524  | 0.4243  | 0.563508 |
| Trim15        | chr17:36860692-36867210   | 1.5607  | 1.0806  | -0.5304 | 0.646309 |
| Nacc2         | chr2:26055534-26123220    | 0.3237  | 0.4533  | 0.4856  | 0.452763 |
| Gm10097       | chr10:5069191-5071975     | 0.4746  | 0.7304  | 0.6220  | 0.628685 |
| Kitl          | chr10:100015629-100100413 | 0.1378  | 0.0817  | -0.7544 | 0.594651 |
| Fgfr3         | chr5:33721723-33737068    | 0.1212  | 0.0736  | -0.7190 | 0.578517 |
| Gm7580        | chr7:74392697-74411233    | 1.6446  | 0.8982  | -0.8727 | 0.620808 |
| St6galnac5    | chr3:152817080-152982246  | 0.1797  | 0.1064  | -0.7557 | 0.649803 |
| Anapc4        | chr5:52834014-52867797    | 14.6326 | 15.6075 | 0.0930  | 0.339956 |
| Amn1          | chr6:149157146-149188712  | 4.1570  | 4.6085  | 0.1487  | 0.338196 |
| P2rx1         | chr11:72999102-73015200   | 0.3258  | 0.1827  | -0.8343 | 0.618254 |

|               |                           |          |          |         |          |
|---------------|---------------------------|----------|----------|---------|----------|
| Klh121        | chr4:152008802-152017680  | 6.7731   | 7.5541   | 0.1574  | 0.582621 |
| Itpkc         | chr7:27207171-27228628    | 5.0695   | 5.6520   | 0.1569  | 0.495562 |
| Ptrf          | chr11:100956732-100970887 | 0.3113   | 0.4759   | 0.6124  | 0.584370 |
| Mob2          | chr7:142008552-142061034  | 29.8446  | 28.2349  | -0.0800 | 0.426103 |
| Zfp438        | chr18:5210030-5334439     | 1.6557   | 1.4033   | -0.2386 | 0.501987 |
| Cep250        | chr2:155956457-155998900  | 17.9133  | 17.0251  | -0.0734 | 0.728856 |
| Ncoa7         | chr10:30645583-30803107   | 19.7183  | 18.7870  | -0.0698 | 0.643252 |
| E130307A14Rik | chr10:39621411-39732007   | 3.8781   | 4.2448   | 0.1303  | 0.400127 |
| Pcnt          | chr10:76351253-76442912   | 20.3221  | 19.4491  | -0.0634 | 0.733426 |
| Tcf3          | chr10:80409513-80433647   | 21.5966  | 20.2725  | -0.0913 | 0.725993 |
| Mknk2         | chr10:80665331-80671976   | 125.2702 | 120.7722 | -0.0528 | 0.725358 |
| Gm24119       | chr10:91118290-91118536   | 263.6182 | 219.6374 | -0.2633 | 0.650508 |
| Ube2n         | chr10:95515161-95545658   | 5.2178   | 4.7589   | -0.1328 | 0.592810 |
| Ppia          | chr11:6415442-6419817     | 13.8551  | 13.0314  | -0.0884 | 0.609645 |
| Spns3         | chr11:72494918-72550506   | 0.1307   | 0.2058   | 0.6558  | 0.450628 |
| Sfn5          | chr11:82951348-82962941   | 39.5187  | 42.6863  | 0.1112  | 0.661371 |
| Gm11478       | chr11:86630427-86631026   | 9.7071   | 11.8924  | 0.2929  | 0.634173 |
| Ankrd40       | chr11:94328000-94341841   | 16.3198  | 15.3591  | -0.0875 | 0.693889 |
| Eme1          | chr11:94644995-94653964   | 6.7780   | 7.5186   | 0.1496  | 0.391141 |
| Socs7         | chr11:97362550-97398542   | 8.2080   | 7.7633   | -0.0804 | 0.605595 |
| Kcnh4         | chr11:100740375-100759942 | 0.6180   | 0.4915   | -0.3304 | 0.343503 |
| Gm11737       | chr11:118204711-118205179 | 7.9683   | 6.2768   | -0.3442 | 0.670310 |
| Cfl2          | chr12:54858816-54862877   | 12.0634  | 11.1803  | -0.1097 | 0.661354 |
| Nemf          | chr12:69311543-69357176   | 41.3621  | 43.9447  | 0.0874  | 0.485506 |
| Med6          | chr12:81573556-81595008   | 17.0056  | 15.7530  | -0.1104 | 0.535857 |
| Ak7           | chr12:105705981-105782447 | 1.6036   | 1.3375   | -0.2618 | 0.630988 |
| Zfp367        | chr13:64133021-64153202   | 9.4710   | 10.1507  | 0.1000  | 0.279956 |
| Zfp712        | chr13:67038593-67061170   | 5.4183   | 6.1160   | 0.1748  | 0.583821 |
| Trip13        | chr13:73912461-73937767   | 4.3428   | 5.0062   | 0.2051  | 0.472967 |
| Zfyve28       | chr5:34194873-34288449    | 0.9360   | 1.1140   | 0.2512  | 0.543088 |
| G3bp2         | chr5:92052145-92083735    | 50.9194  | 54.1733  | 0.0894  | 0.549561 |
| Evi5          | chr5:107744794-107875107  | 0.7915   | 0.9263   | 0.2270  | 0.396944 |
| Acacb         | chr5:114146534-114250761  | 0.1694   | 0.2271   | 0.4229  | 0.428230 |
| Sh2b3         | chr5:121815487-121836859  | 15.8430  | 14.9384  | -0.0848 | 0.697156 |
| 4933404O12Rik | chr5:136919145-136937112  | 0.7561   | 0.9562   | 0.3386  | 0.553889 |
| Zkscan1       | chr5:138085083-138107822  | 14.8137  | 14.2540  | -0.0556 | 0.538955 |
| Bet1          | chr6:4076898-4086972      | 5.8059   | 5.3199   | -0.1261 | 0.594363 |
| Luc7l2        | chr6:38551333-38609470    | 26.5596  | 25.4212  | -0.0632 | 0.728533 |
| Lrrc6l        | chr6:4854795-48570722     | 6.8250   | 7.5873   | 0.1528  | 0.472812 |
| Hk2           | chr6:82725024-82774454    | 3.5673   | 3.2635   | -0.1284 | 0.642432 |
| Mob1a         | chr6:83326015-83343776    | 105.2766 | 111.3828 | 0.0813  | 0.556449 |
| Tpra1         | chr6:88902250-88912238    | 15.8540  | 14.8214  | -0.0972 | 0.680620 |
| Cecr6         | chr6:120488938-120493807  | 1.6670   | 1.9915   | 0.2566  | 0.635041 |
| H2afj         | chr6:136808247-136810074  | 30.4653  | 33.0839  | 0.1190  | 0.575045 |
| Pdcd5         | chr7:35641981-35647521    | 5.8415   | 5.2182   | -0.1628 | 0.628729 |
| Pnkp          | chr7:44857138-44862925    | 20.7459  | 22.2801  | 0.1029  | 0.452021 |
| Pih1d1        | chr7:45154302-45160069    | 18.8225  | 17.3777  | -0.1152 | 0.703716 |
| Gm9392        | chr7:46820266-46822048    | 3.8723   | 3.3743   | -0.1986 | 0.492006 |
| Nipa2         | chr7:55931286-55962476    | 8.5125   | 9.4053   | 0.1439  | 0.646863 |
| Stard5        | chr7:83631958-83653127    | 76.7472  | 80.4193  | 0.0674  | 0.135619 |
| Ndufc2        | chr7:97400002-97407802    | 49.0342  | 54.5150  | 0.1529  | 0.625077 |
| Aamdc         | chr7:97550330-97579497    | 6.0354   | 5.3566   | -0.1721 | 0.505934 |
| Atg16l2       | chr7:101289391-101302251  | 13.1965  | 14.2846  | 0.1143  | 0.516205 |
| Kdm8          | chr7:125444675-125462265  | 4.2756   | 3.7862   | -0.1754 | 0.522892 |
| Fam175b       | chr7:132859224-132885114  | 10.1022  | 10.9541  | 0.1168  | 0.515240 |
| Uros          | chr7:133686242-133710072  | 6.8962   | 6.3884   | -0.1104 | 0.557552 |
| Tnfrsf26      | chr7:143607684-143627845  | 20.7802  | 22.2250  | 0.0970  | 0.329246 |
| Rrad          | chr8:104628065-104631321  | 17.4181  | 18.9848  | 0.1243  | 0.292888 |
| Gm22701       | chr8:110498851-110499127  | 48.9457  | 56.8582  | 0.2162  | 0.644789 |
| Gm20388       | chr8:119910840-124345722  | 31.3905  | 33.3578  | 0.0877  | 0.442099 |
| Galnt2        | chr8:124231390-124345724  | 29.0086  | 30.8175  | 0.0873  | 0.447668 |
| Fut4          | chr9:14748458-14752122    | 0.2076   | 0.3315   | 0.6747  | 0.478322 |
| Hinfp         | chr9:44295672-44305671    | 16.2490  | 15.2631  | -0.0903 | 0.421902 |
| Lman1l        | chr9:57607084-57620774    | 0.5218   | 0.2961   | -0.8176 | 0.526254 |
| Dis3l         | chr9:64306755-64341288    | 6.0787   | 6.6046   | 0.1197  | 0.330992 |
| Gm16794       | chr9:95942048-95959393    | 4.2558   | 3.8218   | -0.1552 | 0.554888 |
| Gm14703       | chrX:7651105-7657258      | 2.4848   | 3.0225   | 0.2826  | 0.571148 |
| Ndufb11       | chrX:20615325-20617619    | 41.5049  | 46.3582  | 0.1595  | 0.648508 |
| Ofd1          | chrX:166390032-166440704  | 14.1693  | 13.4580  | -0.0743 | 0.616189 |
| Sharpin       | chr15:76347039-76351111   | 29.3198  | 28.2459  | -0.0538 | 0.514026 |
| Apol10b       | chr15:77584157-77596125   | 2.7874   | 3.3223   | 0.2533  | 0.508198 |

|               |                           |          |          |         |          |
|---------------|---------------------------|----------|----------|---------|----------|
| lft27         | chr15:78159464-78174108   | 13.2496  | 15.5419  | 0.2302  | 0.600034 |
| Mapk8         | chr14:33377897-33447158   | 7.0738   | 6.7276   | -0.0724 | 0.557893 |
| Gm20667       | chr14:67673176-67675106   | 1.6792   | 1.2093   | -0.4735 | 0.574312 |
| Ubac2         | chr14:121878605-122021034 | 32.9918  | 35.3204  | 0.0984  | 0.359692 |
| Tmem242       | chr17:5410863-5440260     | 25.0473  | 22.4951  | -0.1550 | 0.721814 |
| 2210404O09Rik | chr17:21879569-21908092   | 8.0324   | 7.2074   | -0.1564 | 0.653697 |
| Gm26694       | chr17:25794893-25964784   | 8.0486   | 9.3325   | -0.2135 | 0.656862 |
| Nudt3         | chr17:27579381-27623465   | 31.8406  | 34.4753  | 0.1147  | 0.624132 |
| Zbtb22        | chr17:33915903-33919324   | 16.8135  | 15.7200  | -0.0970 | 0.661585 |
| Gm25128       | chr17:35247174-35247250   | 11.1478  | 16.8885  | 0.5993  | 0.305466 |
| Cchcr1        | chr17:35517099-35531015   | 2.6990   | 3.0725   | 0.1870  | 0.578831 |
| Hnrnp11       | chr17:80029486-80062334   | 41.1668  | 44.0117  | 0.0964  | 0.583161 |
| Haao          | chr17:83831355-83846790   | 0.4632   | 0.7148   | 0.6257  | 0.489734 |
| Mefv          | chr16:3707214-3718124     | 0.1879   | 0.3535   | 0.9116  | 0.634432 |
| Gm26635       | chr16:17254959-17260326   | 2.2609   | 1.9009   | -0.2502 | 0.650005 |
| Sid1          | chr16:44240179-44333196   | 16.9372  | 16.0898  | -0.0740 | 0.670914 |
| Cd96          | chr16:46035656-46120251   | 90.3988  | 96.8281  | 0.0991  | 0.630048 |
| Mrps6         | chr16:92058269-92112227   | 19.7786  | 21.9805  | 0.1523  | 0.583789 |
| Ltbp3         | chr19:5740903-5758532     | 0.6881   | 0.8934   | 0.3766  | 0.607232 |
| Prpf19        | chr19:10888155-10909559   | 21.8948  | 20.7739  | -0.0758 | 0.730475 |
| Ms4a4c        | chr19:11404769-11427246   | 23.3741  | 25.9737  | 0.1521  | 0.641053 |
| Plgrkt        | chr19:29348598-29367390   | 32.1262  | 34.2785  | 0.0936  | 0.523771 |
| Tcea1         | chr1:4857813-4897909      | 9.9278   | 9.0845   | -0.1281 | 0.671902 |
| Arfgef1       | chr1:10137570-10232670    | 24.1785  | 23.2594  | -0.0559 | 0.695319 |
| Stat4         | chr1:51987147-52107188    | 61.4583  | 65.4616  | 0.0910  | 0.550027 |
| Als2          | chr1:59162925-59237231    | 7.0905   | 6.7033   | -0.0810 | 0.602317 |
| NA            | chr1:60703917-60705656    | 5.9141   | 6.7632   | 0.1935  | 0.480793 |
| Gm25395       | chr1:87776937-87777209    | 346.9287 | 413.9777 | 0.2549  | 0.657190 |
| Nav1          | chr1:135434579-135585355  | 0.0800   | 0.0509   | -0.6520 | 0.498067 |
| Axdnd1        | chr1:156323508-156421159  | 0.1873   | 0.1194   | -0.6493 | 0.613036 |
| Gm15429       | chr1:161725535-161727682  | 0.7661   | 0.5236   | -0.5489 | 0.371378 |
| Scyl3         | chr1:163929099-163955126  | 14.5048  | 15.5191  | 0.0975  | 0.446472 |
| Slc26a2       | chr18:61192918-61211612   | 11.9982  | 11.4653  | -0.0655 | 0.688173 |
| Gpsm1         | chr2:26315514-26348237    | 3.4068   | 3.8230   | 0.1663  | 0.565310 |
| Rexo4         | chr2:26953562-26964386    | 22.7225  | 24.2395  | 0.0932  | 0.388743 |
| Gle1          | chr2:29935425-29960371    | 8.6823   | 9.3273   | 0.1034  | 0.352794 |
| Kbtbd4        | chr2:90904739-90911626    | 14.4269  | 13.6773  | -0.0770 | 0.474766 |
| Spred1        | chr2:117121373-117182279  | 5.3033   | 4.9052   | -0.1126 | 0.643144 |
| Dnajc17       | chr2:119172499-119208795  | 8.5903   | 9.9787   | 0.2161  | 0.536487 |
| Cdc25b        | chr2:131186948-131198497  | 32.6355  | 35.0559  | 0.1032  | 0.604693 |
| Pxmp4         | chr2:154585757-154603708  | 6.3382   | 5.6798   | -0.1582 | 0.684417 |
| Gm21958       | chr3:54713175-54714353    | 8.0357   | 6.6801   | -0.2665 | 0.563270 |
| Mfsd1         | chr3:67582767-67604231    | 33.1419  | 31.7521  | -0.0618 | 0.580188 |
| Hist2h2be     | chr3:96221120-96223738    | 5.5262   | 5.0486   | -0.1304 | 0.231180 |
| Srsf11        | chr3:158010472-158036639  | 25.8587  | 27.3270  | 0.0797  | 0.372550 |
| Decr1         | chr4:15917239-15945507    | 10.4217  | 11.4406  | 0.1346  | 0.601125 |
| Coro2a        | chr4:46536936-46602202    | 33.2849  | 31.9528  | -0.0589 | 0.698012 |
| Magoh         | chr4:107879754-107887424  | 72.8906  | 80.7096  | 0.1470  | 0.690570 |
| Gm23143       | chr4:117202527-117202643  | 9.9481   | 14.6793  | 0.5613  | 0.507649 |
| Gm26615       | chr4:133085473-133089146  | 0.8659   | 1.1220   | 0.3737  | 0.560598 |
| Sh3bgrl3      | chr4:134127405-134128789  | 219.5948 | 236.3135 | 0.1059  | 0.638147 |
| 2700016F22Rik | chr4:139376548-139380379  | 6.1923   | 6.8573   | 0.1472  | 0.533444 |
| Ctnnbip1      | chr4:149518235-149566437  | 0.8807   | 1.1266   | 0.3553  | 0.515993 |
| Pemt          | chr11:59970613-60046489   | 0.4905   | 0.3142   | -0.6424 | 0.419238 |
| Plac8         | chr5:100553724-100572245  | 2.6873   | 4.3584   | 0.6976  | 0.352027 |
| 0610040B10Rik | chr5:143329246-143332704  | 1.3660   | 2.0979   | 0.6190  | 0.486451 |
| Gm15503       | chr7:128410419-128412341  | 3.3045   | 4.8193   | 0.5444  | 0.536813 |
| NA            | chrX:145601810-145602301  | 1.6184   | 1.0086   | -0.6821 | 0.614019 |
| Gm3629        | chr14:6583958-6874257     | 0.8278   | 1.1256   | 0.4434  | 0.542473 |
| Dll1          | chr17:15367353-15376872   | 0.4034   | 0.2657   | -0.6028 | 0.617185 |
| Gm15443       | chr1:149025227-149026047  | 1.2501   | 1.8935   | 0.5990  | 0.511638 |
| Nr1h3         | chr2:91184060-91202834    | 0.1614   | 0.3004   | 0.8960  | 0.473983 |
| Myo5b         | chr18:74440935-74771493   | 0.2065   | 0.1408   | -0.5522 | 0.652836 |
| Gm25820       | chr3:88693930-88694057    | 8.9749   | 13.7417  | 0.6146  | 0.549658 |
| Gm25772       | chr4:137325558-137325614  | 21.1431  | 12.9119  | -0.7115 | 0.486278 |
| Gm5431        | chr11:48887421-48902152   | 0.3063   | 0.4646   | 0.6011  | 0.531191 |
| Gm10617       | chr8:117802061-117803234  | 0.5348   | 0.9548   | 0.8363  | 0.630703 |
| Trpc1         | chr9:95706626-95750358    | 0.2583   | 0.4549   | 0.8165  | 0.607784 |
| Gm7785        | chr1:91296044-91296936    | 0.8462   | 0.4705   | -0.8469 | 0.548533 |
| 1700084C06Rik | chr9:21091754-21128393    | 14.5195  | 13.0476  | -0.1542 | 0.382942 |
| Wdr1          | chr5:38526813-38561666    | 277.7532 | 290.1027 | 0.0628  | 0.073846 |



|               |                           |          |          |         |          |
|---------------|---------------------------|----------|----------|---------|----------|
| Thumpd3       | chr6:113046224-113068273  | 28.0321  | 26.8166  | -0.0640 | 0.680838 |
| Tssc4         | chr7:143069248-143071093  | 16.7158  | 15.4443  | -0.1141 | 0.630987 |
| Ndufa13       | chr8:69894187-69902558    | 83.7355  | 90.3794  | -0.1102 | 0.626401 |
| Cep83os       | chr10:94673492-94688613   | 4.4469   | 5.0757   | 0.1908  | 0.651146 |
| Tbc1d10a      | chr11:4186788-4215505     | 19.1562  | 17.9835  | -0.0911 | 0.693272 |
| Tmed4         | chr11:6270368-6274870     | 15.6466  | 17.0696  | 0.1256  | 0.512522 |
| Ablim2        | chr5:35757879-35884973    | 0.3335   | 0.2329   | -0.5178 | 0.609222 |
| Ankle2        | chr5:110231003-110256651  | 29.4384  | 28.3298  | -0.0554 | 0.655273 |
| Dynll1        | chr5:115297109-115300999  | 12.0144  | 13.5737  | 0.1760  | 0.688691 |
| Hipk2         | chr6:38694389-38876165    | 4.7895   | 5.3616   | 0.1628  | 0.699992 |
| Z310001H17Rik | chr6:129208411-129237982  | 19.7745  | 21.1653  | 0.0981  | 0.571391 |
| Tacc1         | chr8:25154551-25201449    | 35.8747  | 38.0026  | 0.0831  | 0.544895 |
| Mrpl13        | chr15:55534093-55557748   | 5.7429   | 5.4165   | -0.0844 | 0.615711 |
| Selo          | chr15:89089083-89100340   | 17.3385  | 18.5819  | 0.0999  | 0.409877 |
| Eif4b         | chr15:102073772-102097172 | 176.7639 | 171.0504 | -0.0474 | 0.696105 |
| Tmem260       | chr14:48446127-48515135   | 6.7891   | 6.4137   | -0.0821 | 0.640054 |
| Cobll1        | chr2:65088338-65239403    | 1.9480   | 1.7524   | -0.1527 | 0.656643 |
| Arfgap2       | chr2:91264973-91276931    | 16.7246  | 15.9352  | -0.0698 | 0.573265 |
| Ppip5k1       | chr2:121310560-121355396  | 1.8626   | 1.6806   | -0.1483 | 0.712543 |
| Col9a3        | chr2:180597789-180622189  | 1.4070   | 1.1439   | -0.2987 | 0.675400 |
| Gm17029       | chr4:148960296-148984671  | 2.7252   | 2.4481   | -0.1547 | 0.643400 |
| Mir21a        | chr11:86584066-86584158   | 8.3106   | 13.1203  | 0.6588  | 0.455333 |
| Gm4117        | chr13:89739459-89887166   | 0.0309   | 0.0216   | -0.5143 | 0.589891 |
| Gm7488        | chr3:21049444-21050525    | 0.6628   | 1.0777   | 0.7012  | 0.549800 |
| Ptk2b         | chr14:66153256-66281052   | 38.0639  | 36.7395  | -0.0511 | 0.695677 |
| Specc1l       | chr10:75212072-75312399   | 22.3754  | 23.6969  | 0.0828  | 0.343489 |
| mmu-mir-3061  | chr11:52124529-52127779   | 6.8388   | 7.5974   | 0.1518  | 0.523213 |
| Rpl27         | chr11:101442297-101445529 | 9.8470   | 8.8916   | -0.1472 | 0.597088 |
| Hbp1          | chr12:31926253-31950535   | 31.0653  | 32.8660  | 0.0813  | 0.429090 |
| Gm7008        | chr12:40222757-40229184   | 5.1855   | 5.9824   | 0.2063  | 0.470453 |
| Serf1         | chr13:100107996-100114571 | 2.2853   | 3.0186   | 0.4015  | 0.557106 |
| Rnf4          | chr5:34336288-34355629    | 26.0442  | 27.4834  | 0.0776  | 0.391664 |
| Gm26591       | chr6:120033521-120036471  | 3.4489   | 2.8706   | -0.2648 | 0.713912 |
| Gm15884       | chr6:124715572-124718831  | 40.3868  | 37.6761  | -0.1002 | 0.482352 |
| Lsr           | chr7:30957408-30983169    | 4.1223   | 4.6139   | 0.1625  | 0.589803 |
| Pdcd2l        | chr7:34184498-34196661    | 10.9982  | 9.9936   | -0.1382 | 0.534252 |
| Grwd1         | chr7:45825226-45830944    | 18.4438  | 17.1323  | -0.1064 | 0.692901 |
| Topbp1        | chr9:103305214-103350432  | 48.6526  | 51.9433  | 0.0944  | 0.624680 |
| Clasp2        | chr9:113812585-113919697  | 15.2468  | 14.5114  | -0.0713 | 0.657478 |
| Tmem29        | chrX:150397772-150459154  | 1.5163   | 1.7617   | 0.2165  | 0.573030 |
| Gm15512       | chr14:33365950-33370143   | 0.7133   | 0.4734   | -0.5913 | 0.510552 |
| NA            | chr17:30485510-30485963   | 1.6200   | 2.7261   | 0.7509  | 0.648499 |
| Pak2          | chr16:32016289-32079342   | 54.1747  | 52.6403  | -0.0415 | 0.563643 |
| Imp4          | chr1:34439850-34445736    | 30.0837  | 28.1441  | -0.0962 | 0.735568 |
| Bcs1l         | chr1:74588288-74592443    | 5.6500   | 6.3580   | 0.1703  | 0.427701 |
| B230369F24Rik | chr1:178313327-178318549  | 1.8406   | 1.4549   | -0.3392 | 0.681244 |
| March3        | chr18:56761715-56925548   | 1.0694   | 1.2712   | 0.2494  | 0.614650 |
| Golga3        | chr2:39016260-39065541    | 14.8444  | 14.1250  | -0.0717 | 0.651990 |
| Zcchc3        | chr2:152411955-152415044  | 0.7354   | 0.9841   | 0.4202  | 0.599094 |
| Gm20431       | chr2:167607849-167661496  | 7.7689   | 7.0639   | -0.1372 | 0.627416 |
| Gm12404       | chr4:41520693-41525823    | 0.8509   | 0.5573   | -0.6105 | 0.533600 |
| Tbc1d2        | chr4:46604389-46650209    | 0.6319   | 0.7733   | 0.2914  | 0.489043 |
| Tmtc1         | chr6:148232429-148444389  | 0.1121   | 0.0660   | -0.7634 | 0.645630 |
| Traj39        | chr14:54179961-54180024   | 71.6458  | 52.8869  | -0.4380 | 0.664564 |
| Tmem180       | chr19:46341120-46375252   | 0.7031   | 0.9873   | 0.4898  | 0.456469 |
| Eif5a         | chr11:69916713-69921958   | 117.3218 | 112.6102 | -0.0591 | 0.727885 |
| Nol10         | chr12:17348457-17430094   | 14.2119  | 13.2849  | -0.0973 | 0.681387 |
| Hectd1        | chr12:51743721-51829536   | 98.6072  | 96.3910  | -0.0328 | 0.361756 |
| Ndufa5        | chr6:24518665-24528013    | 27.4410  | 24.9875  | -0.1351 | 0.749132 |
| Slc2a3        | chr6:122727808-122801640  | 22.0025  | 23.3802  | 0.0876  | 0.533310 |
| Dock6         | chr9:21800183-21852635    | 0.5498   | 0.4384   | -0.3266 | 0.658044 |
| Pou6f1        | chr15:100575317-100599984 | 3.5994   | 3.2564   | -0.1445 | 0.697795 |
| Sfmbt1        | chr14:30714848-30822713   | 2.8175   | 3.0994   | 0.1376  | 0.452371 |
| Traj53        | chr14:54162643-54162709   | 17.6155  | 11.8340  | -0.5739 | 0.504507 |
| Znrd1         | chr17:36954357-36958559   | 29.5314  | 32.7897  | 0.1510  | 0.572150 |
| Gm20695       | chr16:3884647-3919517     | 28.2949  | 26.4811  | -0.0956 | 0.554366 |
| Rassf5        | chr1:131176409-131245258  | 79.8430  | 83.8394  | 0.0705  | 0.247495 |
| Usp6nl        | chr2:6322666-6446390      | 6.2840   | 5.9007   | -0.0908 | 0.678309 |
| Gm13050       | chr4:143242023-143243368  | 19.4051  | 17.8595  | -0.1197 | 0.674794 |
| Gm11969       | chr11:6182678-6183034     | 1.4749   | 2.5493   | 0.7895  | 0.525064 |
| Gm16161       | chr6:113275836-113276930  | 5.5277   | 3.7064   | -0.5766 | 0.656816 |

|               |                           |          |          |         |          |
|---------------|---------------------------|----------|----------|---------|----------|
| Gm13152       | chr4:147492416-147513486  | 0.3732   | 0.6448   | 0.7890  | 0.459504 |
| Cisd3         | chr11:97685825-97688621   | 7.2074   | 8.4895   | 0.2362  | 0.519684 |
| Cep112os1     | chr11:108529096-108533664 | 0.7315   | 0.5570   | -0.3933 | 0.590817 |
| Rnf6          | chr5:146209191-146221555  | 21.8760  | 23.6891  | 0.1149  | 0.598270 |
| Syap1         | chrX:162857056-162888447  | 20.9291  | 19.7601  | -0.0829 | 0.652236 |
| Ptprs         | chr17:56412430-56476483   | 13.4402  | 14.5052  | 0.1100  | 0.628245 |
| Gm6767        | chr16:51362451-51363832   | 1.3604   | 1.7468   | 0.3607  | 0.367479 |
| Srp19         | chr18:34330846-34336599   | 11.1483  | 12.1074  | 0.1191  | 0.541542 |
| 8030462N17Rik | chr18:77633280-77714010   | 16.5987  | 15.8526  | -0.0663 | 0.486612 |
| BC030499      | chr11:78290840-78296805   | 0.8300   | 0.6101   | -0.4440 | 0.624010 |
| Narfl         | chr17:25773775-25783332   | 9.2377   | 10.0936  | 0.1278  | 0.553048 |
| Pyhin1        | chr1:173630858-173647928  | 104.1635 | 111.1000 | 0.0930  | 0.636213 |
| Actr6         | chr10:89711972-89732295   | 11.1186  | 10.1350  | -0.1336 | 0.647559 |
| Tpt1-ps3      | chr6:99877746-99878433    | 1.7566   | 2.5465   | 0.5357  | 0.631937 |
| Zfp110        | chr7:12834760-12850577    | 29.7275  | 28.6261  | -0.0545 | 0.631845 |
| Echs1         | chr7:140105709-140116476  | 6.7635   | 7.2978   | 0.1097  | 0.293633 |
| Cc2d1a        | chr8:84132827-84147936    | 18.3814  | 16.9987  | -0.1128 | 0.783655 |
| Zrsr2         | chrX:163935442-163958661  | 8.0356   | 7.6352   | -0.0737 | 0.621901 |
| Cacnb3        | chr15:98632219-98644530   | 0.8313   | 0.6458   | -0.3641 | 0.553752 |
| Mir18         | chr14:115043850-115043946 | 11.6595  | 7.5011   | -0.6363 | 0.546222 |
| Tmem39a       | chr16:38558697-38592162   | 7.0682   | 6.6139   | -0.0959 | 0.549125 |
| Set           | chr2:30057377-30072577    | 23.3727  | 22.2031  | -0.0741 | 0.727359 |
| Pdrg1         | chr2:153008889-153015427  | 21.5735  | 20.4273  | -0.0788 | 0.608025 |
| Exosc9        | chr3:36552605-36565729    | 14.7264  | 15.9373  | 0.1140  | 0.616603 |
| Reck          | chr4:43875529-43944806    | 1.5078   | 1.3282   | -0.1830 | 0.406319 |
| Agpat9        | chr5:100845712-100899102  | 0.4828   | 0.3237   | -0.5767 | 0.568898 |
| Fam187b       | chr7:30973803-30989720    | 0.2359   | 0.4205   | 0.8340  | 0.565209 |
| Gm16409       | chr14:73796540-73797290   | 0.7954   | 1.2842   | 0.6911  | 0.464553 |
| Gm26407       | chr18:12961498-12961805   | 2.4057   | 4.1377   | 0.7823  | 0.658876 |
| Mogs          | chr6:83115495-83118898    | 54.6176  | 57.5884  | 0.0764  | 0.259178 |
| Pex5          | chr6:124396815-124415067  | 9.2534   | 10.0531  | 0.1196  | 0.445127 |
| 1500011B03Rik | chr5:114808195-114813976  | 12.8608  | 11.8764  | -0.1149 | 0.417989 |
| Gm16305       | chr1:138991549-138992021  | 3.3383   | 2.3734   | -0.4921 | 0.605873 |
| Cfb           | chr17:34856373-34862518   | 1.0214   | 0.8311   | -0.2976 | 0.362936 |
| Gtf2h4        | chr17:35667729-35673739   | 5.0901   | 4.5859   | -0.1505 | 0.664911 |
| Srsf5         | chr12:80945503-80950507   | 116.8504 | 113.6693 | -0.0398 | 0.613010 |
| Rtl1          | chr12:109589193-109600330 | 0.1312   | 0.0726   | -0.8538 | 0.620289 |
| Pkn1          | chr8:83669761-83699179    | 30.0244  | 28.9114  | -0.0545 | 0.703592 |
| Saysd1        | chr14:20075645-20083172   | 5.9879   | 5.2292   | -0.1954 | 0.650641 |
| Slc35c1       | chr2:92452763-92460538    | 9.9798   | 9.3120   | -0.0999 | 0.642261 |
| Ddx27         | chr2:167015192-167034947  | 29.5502  | 28.4780  | -0.0533 | 0.632489 |
| Ttf2          | chr3:100938859-100969663  | 10.3637  | 9.9011   | -0.0659 | 0.538675 |
| Rab34         | chr11:78188429-78192193   | 0.3761   | 0.2052   | -0.8741 | 0.623121 |
| Gm10288       | chr3:146838774-146839365  | 1.3104   | 0.7933   | -0.7240 | 0.451709 |
| Thy1          | chr9:44043383-44048579    | 151.0970 | 146.3765 | -0.0458 | 0.633990 |
| 1110046J04Rik | chr13:33935566-33960181   | 0.6676   | 0.4693   | -0.5084 | 0.642064 |
| Stard3nl      | chr13:19357676-19395752   | 11.3732  | 12.7383  | 0.1635  | 0.494775 |
| 2900026A02Rik | chr5:113086322-113163351  | 0.2324   | 0.3180   | 0.4526  | 0.612924 |
| Atg101        | chr15:101284300-101290934 | 15.8733  | 17.9388  | 0.1765  | 0.617143 |
| Hddc2         | chr10:31313381-31328204   | 6.4518   | 7.1148   | 0.1411  | 0.452932 |
| Rpf2          | chr10:40223245-40247036   | 21.8081  | 20.1022  | -0.1175 | 0.733157 |
| Phlda1        | chr10:111506285-111508645 | 0.9124   | 0.6893   | -0.4046 | 0.492909 |
| Rmi1          | chr13:58402596-58411149   | 3.3280   | 2.9818   | -0.1585 | 0.539500 |
| Gm20457       | chr7:64337549-64345964    | 2.8860   | 3.8476   | 0.4149  | 0.646606 |
| Vkorc1        | chr7:127893066-127895617  | 6.4712   | 7.6533   | 0.2420  | 0.482908 |
| Pwwp2b        | chr7:139248481-139267253  | 1.3605   | 1.0849   | -0.3266 | 0.667477 |
| Lrrc56        | chr7:141194156-141210055  | 1.1498   | 1.0094   | -0.1879 | 0.432715 |
| Nkap          | chrX:37126794-37150746    | 10.7157  | 11.5407  | 0.1070  | 0.431531 |
| Rbm41         | chrX:139889510-139988595  | 5.2232   | 4.8612   | -0.1036 | 0.690911 |
| Mapk12        | chr15:89130584-89140703   | 1.9368   | 2.3838   | 0.2996  | 0.589033 |
| Vps13a        | chr19:16616762-16780822   | 39.0532  | 37.6922  | -0.0512 | 0.696745 |
| Kcnp2         | chr19:45791838-45816061   | 3.5966   | 3.2438   | -0.1489 | 0.574253 |
| Gsto1         | chr19:47854969-47864790   | 11.2935  | 12.7255  | 0.1722  | 0.658764 |
| Fasl          | chr1:161780690-161788495  | 17.4621  | 16.3363  | -0.0961 | 0.591305 |
| Mocos         | chr18:24653690-24701556   | 1.7105   | 2.0673   | 0.2733  | 0.564470 |
| Dhx35         | chr2:158794806-158858214  | 7.2376   | 7.9129   | 0.1287  | 0.569720 |
| Ttc39b        | chr4:83220299-83324255    | 33.7570  | 32.2938  | -0.0640 | 0.770598 |
| 9630013D21Rik | chr4:109651528-109657853  | 2.5885   | 3.1144   | 0.2668  | 0.623935 |
| E130218I03Rik | chr4:134243661-134245873  | 9.6274   | 8.9085   | -0.1120 | 0.569386 |
| Stmn1         | chr4:134468319-134473843  | 3.6909   | 3.2478   | -0.1845 | 0.432586 |
| Gm8093        | chr9:78427506-78430805    | 0.5707   | 0.3743   | -0.6087 | 0.654587 |

|               |                           |          |          |         |          |
|---------------|---------------------------|----------|----------|---------|----------|
| Gm24726       | chr10:7848360-7848481     | 6.9131   | 4.0164   | -0.7834 | 0.587491 |
| Gm867         | chr10:75937720-75940672   | 2.4744   | 1.9734   | -0.3264 | 0.504903 |
| Unc119b       | chr5:115122549-115134975  | 16.3580  | 17.4340  | -0.0919 | 0.402846 |
| Vkorc1l1      | chr5:129942108-129984745  | 6.0816   | 5.6025   | -0.1184 | 0.478097 |
| Gm15492       | chr6:113308665-113326747  | 6.9648   | 5.8929   | -0.2411 | 0.305677 |
| Zfp143        | chr7:110061701-110095392  | 25.8914  | 28.2877  | 0.1277  | 0.697967 |
| Gm26816       | chr8:110863228-110940314  | 6.2517   | 5.5015   | -0.1844 | 0.739146 |
| AB124611      | chr9:21526175-21545333    | 18.3801  | 20.0967  | 0.1288  | 0.489050 |
| Cbx6          | chr15:79823895-79834688   | 14.2132  | 15.2927  | 0.1056  | 0.624555 |
| Fdft1         | chr14:63145152-63177793   | 11.5071  | 12.6401  | 0.1355  | 0.624163 |
| Mettl4        | chr17:94727079-94749892   | 16.7214  | 18.2835  | 0.1288  | 0.551703 |
| Arl8a         | chr1:135146823-135156269  | 5.4694   | 6.2283   | 0.1875  | 0.572494 |
| Shhg4         | chr18:35553409-35558316   | 14.8689  | 12.7812  | -0.2183 | 0.743574 |
| Odf2          | chr2:29889220-29931746    | 11.3333  | 12.0332  | 0.0865  | 0.455026 |
| Secisbp2l     | chr2:125736985-125782870  | 21.4866  | 20.8277  | -0.0449 | 0.545718 |
| Edem2         | chr2:155701676-155729475  | 15.5637  | 14.7188  | -0.0805 | 0.669008 |
| Sema4a        | chr3:88435958-88461182    | 5.8037   | 6.3061   | 0.1198  | 0.360038 |
| Lenep         | chr3:89400987-89402793    | 5.6449   | 5.0373   | -0.1643 | 0.577720 |
| Gm15494       | chr7:4445696-4471249      | 2.4897   | 1.4221   | -0.8079 | 0.566463 |
| Gm16353       | chr9:75132958-75134181    | 1.0026   | 0.5695   | -0.8159 | 0.639743 |
| Ptch2         | chr4:117096074-117116101  | 0.1422   | 0.2160   | 0.6032  | 0.458753 |
| Zfp2          | chr11:50898711-50916165   | 0.3391   | 0.2525   | -0.4254 | 0.376601 |
| Fbxo48        | chr11:16951374-16954772   | 1.3725   | 1.7328   | 0.3363  | 0.514904 |
| Myl4          | chr11:104550662-104595753 | 1.4248   | 1.2402   | -0.2002 | 0.422330 |
| Tmem63c       | chr12:87021339-87090043   | 0.8459   | 0.6585   | -0.3613 | 0.685852 |
| Vimp          | chr7:66079648-66089412    | 29.5529  | 27.3810  | -0.1101 | 0.714320 |
| Igf2bp2       | chr16:22059008-22163299   | 0.1779   | 0.1113   | -0.6761 | 0.534408 |
| Rbm12         | chr2:156091957-156111978  | 19.2976  | 18.5694  | -0.0555 | 0.629193 |
| Ube4b         | chr4:149328415-149426749  | 11.4346  | 12.1699  | 0.0899  | 0.410584 |
| Rnf7          | chr9:96470940-96478675    | 20.0019  | 21.9811  | 0.1361  | 0.549447 |
| Slc25a30      | chr14:75761998-75787037   | 20.8050  | 19.5652  | -0.0886 | 0.573213 |
| Catsper2      | chr2:121392630-121413792  | 0.9331   | 0.7577   | -0.3004 | 0.567860 |
| Atcayos       | chr10:81194608-81210877   | 1.6824   | 1.4301   | -0.2344 | 0.704834 |
| Fbxo7         | chr10:86021971-86051873   | 4.8060   | 5.2492   | 0.1273  | 0.482682 |
| Gm11974       | chr11:6525590-6528760     | 18.0234  | 16.5647  | -0.1218 | 0.685933 |
| Gm12103       | chr11:30822241-30822670   | 2.5097   | 1.6194   | -0.6320 | 0.552830 |
| Tgtp2         | chr11:49057193-49064206   | 15.3321  | 16.5352  | 0.1090  | 0.468447 |
| Ovca2         | chr11:75175941-75178835   | 19.7668  | 18.6640  | -0.0828 | 0.642441 |
| NA            | chr11:85234774-85235223   | 5.4841   | 4.3432   | -0.3365 | 0.476663 |
| Adam4         | chr12:81419442-81421946   | 1.2015   | 1.5425   | 0.3604  | 0.691201 |
| Pcsk1         | chr13:75089825-75132498   | 1.0026   | 1.2735   | 0.3450  | 0.700698 |
| Sh3tc1        | chr5:35697179-35729276    | 0.8913   | 1.1661   | 0.3877  | 0.636968 |
| Rfc3          | chr5:151642755-151651242  | 8.9667   | 8.4764   | -0.0811 | 0.323814 |
| Trbv26        | chr6:41227524-41227993    | 29.0082  | 34.4933  | 0.2499  | 0.592133 |
| Zfp658        | chr7:43562255-43575461    | 2.8316   | 2.5563   | -0.1476 | 0.255083 |
| Rpl13a        | chr7:45125557-45136231    | 339.1308 | 364.2302 | 0.1030  | 0.704073 |
| Gm16158       | chr7:68338667-68353201    | 9.2135   | 11.0687  | 0.2647  | 0.643433 |
| Rsf1          | chr7:97579895-97692782    | 12.2987  | 11.8143  | -0.0580 | 0.695968 |
| Homer3        | chr8:70282826-70294361    | 5.1417   | 5.7516   | 0.1617  | 0.564965 |
| Fam46a        | chr9:85320438-85327124    | 5.2094   | 5.9193   | 0.1843  | 0.724919 |
| 6030458C11Rik | chr15:12808176-12824657   | 13.8518  | 14.8305  | 0.0985  | 0.387924 |
| Eef1d         | chr15:75894795-75909556   | 31.5749  | 29.9342  | -0.0770 | 0.767566 |
| Rarg          | chr15:102234937-102257517 | 18.0508  | 16.9466  | -0.0911 | 0.744347 |
| Traj40        | chr14:54177920-54177981   | 39.1975  | 50.1823  | 0.3564  | 0.578100 |
| Tbc1d24       | chr17:24175430-24205562   | 0.4826   | 0.5986   | 0.3108  | 0.672813 |
| H2-T24        | chr17:36005694-36020560   | 47.7309  | 51.2477  | 0.1026  | 0.606067 |
| Frmf8         | chr19:5849701-5875274     | 38.4850  | 37.1172  | -0.0522 | 0.696413 |
| Dnajc4        | chr19:6987910-6992503     | 23.7114  | 22.0348  | -0.1058 | 0.605327 |
| Ifit3         | chr19:34583530-34588731   | 18.9945  | 24.5578  | 0.3706  | 0.613264 |
| Tnks2         | chr19:36834231-36893477   | 46.7397  | 45.4753  | -0.0396 | 0.629111 |
| Rpl5-ps1      | chr1:14865071-14865965    | 1.3538   | 0.8976   | -0.5929 | 0.664627 |
| Ptp4a1        | chr1:30940302-30949770    | 1.3348   | 1.5441   | 0.2101  | 0.555108 |
| Mrps9         | chr1:42851232-42905682    | 34.5992  | 37.6186  | 0.1207  | 0.604616 |
| Creg1         | chr1:165763745-165775308  | 8.6403   | 9.5172   | 0.1395  | 0.487930 |
| D3Ertd751e    | chr3:41742610-41759389    | 4.4158   | 5.0294   | 0.1877  | 0.705785 |
| Bcas2         | chr3:103171654-103179166  | 17.2361  | 16.3296  | -0.0779 | 0.746162 |
| Eif4e         | chr3:138526190-138557599  | 17.3551  | 16.1560  | -0.1033 | 0.741621 |
| Rbm12b2       | chr4:12089438-12096243    | 12.8340  | 11.9456  | -0.1035 | 0.711120 |
| Tubg2         | chr11:101155906-101161787 | 0.2436   | 0.4309   | 0.8229  | 0.433003 |
| Cenpp         | chr13:49464026-49652746   | 3.8569   | 5.1315   | 0.4119  | 0.482538 |
| Gm4784        | chrX:109388743-109392165  | 0.6004   | 0.8787   | 0.5495  | 0.463404 |

|               |                           |          |          |         |          |
|---------------|---------------------------|----------|----------|---------|----------|
| Trav6d-4      | chr14:52753366-52753844   | 2.1013   | 3.5219   | 0.7451  | 0.586701 |
| Gm11425       | chr11:83027499-83027997   | 1.1974   | 1.8889   | 0.6576  | 0.499312 |
| Gm26461       | chr9:88553235-88553534    | 5.7782   | 4.3174   | -0.4205 | 0.520114 |
| Rpp14         | chr14:8090077-8090554     | 29.0557  | 33.1785  | 0.1914  | 0.642168 |
| Snx15         | chr19:6119398-6128304     | 5.6106   | 6.4973   | 0.2117  | 0.644959 |
| Gm10518       | chr1:179803375-179804676  | 7.7336   | 6.7299   | -0.2006 | 0.687921 |
| Slc25a24      | chr3:109123148-109168457  | 12.2867  | 13.2686  | 0.1109  | 0.490151 |
| Acadm         | chr3:153922356-153944632  | 11.7376  | 11.0328  | -0.0893 | 0.585691 |
| 4930539J05Rik | chr3:135436208-135438665  | 4.6197   | 4.0772   | -0.1802 | 0.512215 |
| Zfp748        | chr13:67538640-67553138   | 16.3596  | 15.7266  | -0.0569 | 0.463686 |
| Akap8l        | chr17:32321424-32350581   | 54.7713  | 52.1322  | -0.0712 | 0.740524 |
| Zxdc          | chr6:90369491-90403490    | 7.0978   | 6.7876   | -0.0645 | 0.531702 |
| Kat2b         | chr17:53566860-53672720   | 25.4109  | 24.5629  | -0.0490 | 0.530358 |
| Dyrk1a        | chr16:94570009-94695517   | 26.3753  | 25.4693  | -0.0504 | 0.672375 |
| Nfatc1        | chr18:80606204-80713071   | 21.8431  | 20.4633  | -0.0941 | 0.787878 |
| E130311K13Rik | chr3:63914683-63929472    | 4.6175   | 3.9969   | -0.2082 | 0.717100 |
| Krr1          | chr10:111972663-111988432 | 26.7613  | 25.7314  | -0.0566 | 0.711712 |
| Mxd1          | chr6:86647043-86669159    | 15.2892  | 16.6454  | 0.1226  | 0.674762 |
| Cep89         | chr7:35397034-35438689    | 2.9679   | 2.6789   | -0.1478 | 0.637025 |
| Tspan14       | chr14:40906444-40966807   | 36.3904  | 35.0255  | -0.0552 | 0.539631 |
| Aptx          | chr4:40682381-40703194    | 3.9262   | 4.3471   | 0.1469  | 0.546656 |
| H3f3a         | chr1:180800831-180813943  | 11.6098  | 10.6781  | -0.1207 | 0.743757 |
| B430219N15Rik | chr10:7780184-7781357     | 1.6322   | 2.1470   | 0.3955  | 0.578797 |
| Nhs1          | chr10:18390321-18533892   | 0.6411   | 0.7634   | 0.2518  | 0.603926 |
| Amd1          | chr10:40287457-40302188   | 5.5322   | 4.9955   | -0.1472 | 0.695236 |
| Ccdc38        | chr10:93540631-93584327   | 3.9349   | 3.5980   | -0.1291 | 0.614464 |
| Snord118      | chr11:69073426-69073561   | 16.3068  | 12.9846  | 0.4952  | 0.709047 |
| Rabep1        | chr11:70844777-70943105   | 17.8009  | 17.1116  | -0.0570 | 0.660177 |
| Mrpl10        | chr11:97041559-97049213   | 35.4653  | 33.6245  | -0.0769 | 0.686781 |
| Pomt2         | chr12:87106865-87147902   | 3.1521   | 2.8493   | -0.1457 | 0.664374 |
| Cdyl          | chr13:35659861-35874064   | 7.0355   | 6.4923   | -0.1159 | 0.718443 |
| Depdc1b       | chr13:108316331-108407782 | 2.9154   | 3.4831   | 0.2567  | 0.720144 |
| Zcchc4        | chr5:52775408-52824665    | 3.9357   | 3.6981   | -0.0898 | 0.671207 |
| Lincpint      | chr6:31165522-31218433    | 18.8346  | 16.9762  | -0.1499 | 0.791070 |
| Gm20536       | chr6:72609835-72616190    | 59.9907  | 65.5589  | 0.1281  | 0.482654 |
| Gm15987       | chr6:128951203-128975029  | 0.8317   | 0.6078   | -0.4525 | 0.569850 |
| Rpl28         | chr7:4792873-4794562      | 3.0944   | 3.7667   | 0.2837  | 0.510869 |
| Zfp524        | chr7:5015500-5018486      | 12.6862  | 14.4262  | 0.1854  | 0.630515 |
| Fanci         | chr7:79391928-79450265    | 9.5031   | 10.2779  | 0.1131  | 0.565549 |
| Abce1         | chr8:79683441-79711740    | 82.5680  | 78.1399  | -0.0795 | 0.784764 |
| Foxred1       | chr9:35204205-35211055    | 11.4904  | 12.3260  | 0.1013  | 0.401980 |
| Azi2          | chr9:118040498-118069794  | 21.1233  | 22.3376  | 0.0806  | 0.429166 |
| Gnl3l         | chrX:150983140-151017322  | 16.0133  | 17.1871  | 0.1021  | 0.603179 |
| Gm17638       | chr15:77961673-77967126   | 29.4067  | 31.2032  | 0.0855  | 0.502365 |
| 4930452B06Rik | chr14:8431191-8666240     | 0.5391   | 0.7693   | 0.5129  | 0.507971 |
| Znrd1as       | chr17:36958591-36965622   | 2.2355   | 2.9533   | 0.4018  | 0.635645 |
| Abat          | chr16:8513428-8621568     | 0.2317   | 0.3320   | 0.5191  | 0.603524 |
| Mxi1          | chr19:53310505-53375810   | 6.1089   | 5.6823   | -0.1044 | 0.682001 |
| Dst           | chr1:33908224-34308652    | 7.5749   | 7.1909   | -0.0751 | 0.792218 |
| Zfp142        | chr1:74565126-74588246    | 4.3220   | 4.0877   | -0.0804 | 0.635273 |
| C430014B12Rik | chr1:82691927-82725117    | 4.0031   | 5.3700   | 0.4238  | 0.574792 |
| Ccdc141       | chr2:77009901-77170636    | 0.8910   | 0.7956   | -0.1633 | 0.615532 |
| Ncaph         | chr2:127103808-127133954  | 11.3712  | 12.4576  | 0.1316  | 0.667811 |
| Stk35         | chr2:129800516-129832287  | 3.6039   | 3.3385   | -0.1104 | 0.575650 |
| Slmo2         | chr2:174465066-174473081  | 33.7532  | 36.4370  | 0.1104  | 0.592081 |
| Proser1       | chr3:53463665-53481755    | 2.0727   | 1.8584   | -0.1574 | 0.518358 |
| Exosc8        | chr3:54728677-54735393    | 26.2150  | 28.0943  | 0.0999  | 0.569778 |
| Gnai3         | chr3:108107279-108146146  | 82.9750  | 87.8959  | 0.0831  | 0.595751 |
| Mrpl37        | chr4:107055873-107066868  | 7.8954   | 7.4797   | -0.0780 | 0.408332 |
| Gm13171       | chr4:155502315-155502706  | 2.1950   | 1.5074   | -0.5422 | 0.355546 |
| Gp1ba         | chr11:70639121-70642036   | 2.1869   | 1.7651   | -0.3091 | 0.708168 |
| Coch          | chr12:51593340-51605773   | 1.1538   | 0.8431   | -0.4527 | 0.634949 |
| Grifin        | chr5:140563118-140565071  | 1.3370   | 2.0307   | 0.6030  | 0.469068 |
| Kantr         | chrX:152298499-152327495  | 0.8939   | 1.3335   | 0.5771  | 0.648277 |
| Vta1          | chr10:14654754-14705560   | 18.6900  | 20.3040  | 0.1195  | 0.578425 |
| Pln           | chr10:53337685-53345999   | 1.9438   | 1.5349   | -0.3407 | 0.678507 |
| A230046K03Rik | chr10:83543940-83596469   | 23.9551  | 25.5409  | 0.0924  | 0.602754 |
| Neurl4        | chr11:69901071-69913820   | 15.3864  | 14.7791  | -0.0581 | 0.640498 |
| Ddx5          | chr11:106780354-106789185 | 308.4491 | 300.0624 | -0.0398 | 0.728470 |
| Dnah17        | chr11:118021722-118129219 | 1.6445   | 1.5370   | -0.0975 | 0.590717 |
| Ppp2r3c       | chr12:55280813-55303000   | 10.6544  | 9.8316   | -0.1159 | 0.669452 |

|               |                           |         |         |         |          |
|---------------|---------------------------|---------|---------|---------|----------|
| Naa35         | chr13:59585258-59634798   | 6.6072  | 6.2406  | -0.0824 | 0.613723 |
| Gm5555        | chr5:49552256-49553270    | 2.1264  | 1.6608  | -0.3565 | 0.529011 |
| Gm15820       | chr5:54094000-54095041    | 4.0584  | 5.0093  | 0.3037  | 0.544144 |
| Lrrc8c        | chr5:105519387-105613018  | 12.1749 | 11.6486 | -0.0638 | 0.700626 |
| Slc26a1       | chr5:108669877-108675569  | 2.2643  | 2.0101  | -0.1717 | 0.561492 |
| Tpcn1         | chr5:120534159-120588613  | 7.2519  | 6.6756  | -0.1195 | 0.741885 |
| Gm10382       | chr5:125389321-125390554  | 3.2227  | 3.8713  | 0.2646  | 0.497753 |
| Alkbh4        | chr5:136136145-136141615  | 16.9421 | 18.1718 | 0.1011  | 0.112471 |
| Trim56        | chr5:137105643-137116209  | 27.6248 | 29.3511 | 0.0875  | 0.617776 |
| Hmces         | chr6:87913934-87936629    | 9.6871  | 10.6234 | 0.1331  | 0.516478 |
| Gm26799       | chr6:112696776-112704668  | 4.5088  | 3.9085  | -0.2061 | 0.590277 |
| Tada3         | chr6:113366024-113377883  | 8.9994  | 8.4827  | -0.0853 | 0.600226 |
| Cacna2d4      | chr6:119236525-119352407  | 5.3211  | 4.9094  | -0.1162 | 0.739281 |
| Gm22362       | chr6:131380272-131380406  | 17.4334 | 12.2717 | -0.5065 | 0.651529 |
| Pex11a        | chr7:79735956-79743131    | 1.8652  | 2.2193  | 0.2508  | 0.520605 |
| Map2k7        | chr8:4238739-4251423      | 14.6472 | 14.0446 | -0.0606 | 0.631208 |
| Ccl25         | chr8:4325209-4360020      | 1.3049  | 1.5918  | 0.2868  | 0.467004 |
| Golga7        | chr8:23241352-23257074    | 13.0354 | 11.8817 | -0.1337 | 0.730776 |
| Dctd          | chr8:48099091-48153233    | 3.4423  | 3.9703  | 0.2059  | 0.655698 |
| Dda1          | chr8:71469198-71476098    | 16.7547 | 15.7350 | -0.0906 | 0.717635 |
| Lonp2         | chr8:86624042-86723873    | 27.1435 | 28.6119 | 0.0760  | 0.369424 |
| Gnpat         | chr8:124863032-124890057  | 25.7896 | 24.6853 | -0.0631 | 0.694629 |
| Fam118b       | chr9:35216964-35267805    | 6.6234  | 6.2691  | -0.0793 | 0.575220 |
| E530011L22Rik | chr9:121757206-121759788  | 0.9038  | 1.1959  | 0.4040  | 0.647282 |
| Elk1          | chrX:20933394-20950608    | 2.7177  | 3.0431  | 0.1631  | 0.556717 |
| Rps19bp1      | chr15:80260613-80264306   | 11.3613 | 13.6269 | 0.2623  | 0.635534 |
| Fhit          | chr14:9550091-11162035    | 0.7482  | 1.0876  | 0.5397  | 0.584574 |
| Nubp2         | chr17:24882610-24886350   | 30.9332 | 33.1279 | 0.0989  | 0.330413 |
| 0610011F06Rik | chr17:25875463-25886007   | 22.3599 | 24.5631 | 0.1356  | 0.574202 |
| Atp6v1g2      | chr17:35233659-35238767   | 4.8372  | 5.5200  | 0.1905  | 0.638785 |
| Ddr1          | chr17:35681566-35704621   | 1.4861  | 1.7511  | 0.2367  | 0.614889 |
| Trmt61b       | chr17:71557026-71598755   | 2.1472  | 1.8063  | -0.2494 | 0.659924 |
| Spidr         | chr16:15889226-16146851   | 9.9193  | 9.2472  | -0.1012 | 0.688586 |
| BC048609      | chr19:6080032-6080788     | 4.0878  | 5.5338  | 0.4369  | 0.572082 |
| Naa40         | chr19:7225667-7241222     | 19.9698 | 21.5118 | 0.1073  | 0.599559 |
| Psat1         | chr19:15904677-15947337   | 24.8818 | 26.7583 | 0.1049  | 0.654155 |
| Cspp1         | chr1:10038217-10136768    | 6.8850  | 6.5246  | -0.0776 | 0.706140 |
| Tsga10        | chr1:37754571-37865298    | 0.3360  | 0.2473  | -0.4423 | 0.628914 |
| Mars2         | chr1:55237176-55240058    | 9.9185  | 10.8859 | 0.1343  | 0.617240 |
| Ankzf1        | chr1:75192150-75199387    | 11.4639 | 12.2418 | 0.0947  | 0.400674 |
| Sp100         | chr1:85649987-85709998    | 43.0866 | 41.5131 | -0.0537 | 0.755431 |
| Ing5          | chr1:93803964-93822101    | 18.6821 | 17.9124 | -0.0607 | 0.665421 |
| Tnnt2         | chr1:135836385-135852260  | 0.9853  | 1.4050  | 0.5120  | 0.437413 |
| Usp21         | chr1:171281944-171287991  | 4.6133  | 5.0755  | 0.1378  | 0.523060 |
| Zfp35         | chr18:23989631-24005376   | 6.8961  | 6.4214  | -0.1029 | 0.537457 |
| Rpl7a         | chr2:26910763-26913318    | 27.8187 | 30.2202 | 0.1195  | 0.652978 |
| Gpr107        | chr2:31152315-31219548    | 8.8324  | 9.4610  | 0.0992  | 0.591846 |
| Wdr38         | chr2:38997475-39006168    | 2.7171  | 2.3212  | -0.2272 | 0.696563 |
| Rbbp9         | chr2:144542264-144550869  | 3.3474  | 3.8600  | 0.2056  | 0.534960 |
| Gm14139       | chr2:150181754-150193279  | 0.6783  | 0.4342  | -0.6436 | 0.590021 |
| Kif3b         | chr2:153291412-153333390  | 21.3263 | 22.4918 | 0.0768  | 0.198586 |
| Gm14269       | chr2:170463513-170463819  | 12.5396 | 9.3947  | -0.4166 | 0.599458 |
| Dap3          | chr3:88920802-88951181    | 16.7676 | 16.0236 | -0.0655 | 0.723990 |
| Fam189b       | chr3:89183142-89189295    | 17.0495 | 16.2815 | -0.0665 | 0.615078 |
| Adam15        | chr3:89339639-89349996    | 3.2610  | 2.8945  | -0.1720 | 0.734275 |
| Gng10         | chr4:59035087-59041903    | 34.9401 | 38.7322 | 0.1486  | 0.701785 |
| Rpsa-ps11     | chr4:59162267-59163156    | 9.8965  | 11.4365 | 0.2087  | 0.593000 |
| Trim32        | chr4:65604985-65616238    | 5.5630  | 5.0938  | -0.1271 | 0.619808 |
| Urod          | chr4:116989964-116994413  | 11.4438 | 12.5081 | 0.1283  | 0.542754 |
| Wdtdc1        | chr4:133292458-133353481  | 5.4311  | 4.9802  | -0.1250 | 0.714654 |
| Masp2         | chr4:148602553-148615499  | 13.8580 | 13.1889 | -0.0714 | 0.510048 |
| Gm11964       | chr11:5634138-5634582     | 1.8857  | 1.1742  | -0.6833 | 0.560081 |
| Gm11775       | chr11:121029401-121052357 | 2.7672  | 3.9539  | 0.5148  | 0.571089 |
| Gm17617       | chr13:55132961-55133548   | 42.6306 | 60.5283 | 0.5057  | 0.581529 |
| 8430432A02Rik | chr1:43092587-43093835    | 0.5464  | 0.8515  | 0.6400  | 0.486505 |
| Hsh2d         | chr8:72189667-72200995    | 16.8983 | 18.7981 | 0.1537  | 0.646327 |
| Rnf150        | chr8:82863355-83091271    | 0.0869  | 0.0485  | -0.8398 | 0.652650 |
| Immp1l        | chr2:105904637-105965558  | 11.0833 | 12.5142 | 0.1752  | 0.514703 |
| St6galnac3    | chr3:153205404-153725062  | 2.8810  | 3.5693  | 0.3091  | 0.411139 |
| Ypel3         | chr7:126776954-126780514  | 32.4217 | 34.9305 | 0.1075  | 0.593362 |
| Ap1m2         | chr9:21295456-21312333    | 1.0508  | 0.7988  | -0.3957 | 0.542286 |

|               |                           |           |           |         |          |
|---------------|---------------------------|-----------|-----------|---------|----------|
| Crif2         | chr5:109554710-109558993  | 32.1613   | 35.4833   | 0.1418  | 0.697861 |
| Ctsz          | chr2:174427492-174439039  | 47.8629   | 51.3232   | 0.1007  | 0.592357 |
| Ap5s1         | chr2:131207077-131213514  | 4.6483    | 5.3215    | 0.1951  | 0.455741 |
| Gpr25         | chr1:136258913-136260873  | 0.6861    | 0.4283    | -0.6799 | 0.664448 |
| Armc7         | chr11:115475666-115490467 | 21.6625   | 23.0492   | 0.0895  | 0.358647 |
| Senp7         | chr16:56075408-56190011   | 14.0317   | 14.9729   | 0.0937  | 0.499696 |
| Tmod4         | chr3:95124475-95129209    | 1.9837    | 1.5277    | -0.3769 | 0.625067 |
| Mcu           | chr10:59446983-59616692   | 6.7720    | 6.4262    | -0.0756 | 0.594654 |
| Trerf1        | chr17:47140941-47359458   | 2.8354    | 3.2259    | 0.1861  | 0.627789 |
| Izumo4        | chr10:80702692-80705382   | 44.1183   | 41.8672   | -0.0756 | 0.564032 |
| Hus1          | chr11:8993136-9011191     | 5.1802    | 4.8802    | 0.1861  | 0.639113 |
| Slc35b3       | chr13:38932139-38960875   | 26.8887   | 25.5498   | -0.0737 | 0.692889 |
| Snrpc         | chr17:27839973-27851968   | 3.7680    | 4.0959    | 0.1204  | 0.332247 |
| Def6          | chr17:28207777-28228608   | 68.6084   | 72.7846   | 0.0852  | 0.585918 |
| Btla          | chr16:45224314-45252895   | 83.5310   | 88.4893   | 0.0832  | 0.596672 |
| Mfsd6         | chr1:52656285-52727462    | 9.0961    | 8.6527    | -0.0721 | 0.669071 |
| Eif1a         | chr18:46597703-46610225   | 28.5501   | 26.9808   | -0.0816 | 0.758649 |
| Rph3al        | chr11:75830998-75938429   | 0.8299    | 1.1236    | 0.4372  | 0.606363 |
| Svopl         | chr6:37983738-38046996    | 0.0892    | 0.1687    | 0.9197  | 0.464999 |
| Gsap          | chr5:21186266-21291701    | 16.2281   | 17.4960   | 0.1085  | 0.605339 |
| Ppat          | chr5:76913248-76951578    | 28.5328   | 26.8234   | -0.0891 | 0.770588 |
| Galnt11       | chr5:25222881-25265918    | 11.6967   | 10.9461   | -0.0957 | 0.716359 |
| Fam122a       | chr19:24476501-24477356   | 4.0161    | 4.9400    | 0.2987  | 0.587120 |
| Cdc23         | chr18:34630950-34651735   | 13.8179   | 13.3821   | -0.0462 | 0.571147 |
| Hip1          | chr5:135406522-13545122   | 5.3479    | 5.9831    | 0.1619  | 0.715371 |
| Arhgap18      | chr10:26753420-26918648   | 17.1848   | 18.4177   | 0.1000  | 0.587129 |
| Rpp14         | chr14:8080366-8091834     | 14.8310   | 13.8687   | -0.0968 | 0.694848 |
| Mob4          | chr1:55131230-55154899    | 14.2635   | 15.2991   | 0.1011  | 0.489293 |
| Gm24489       | chr1:161037600-161037681  | 90.0254   | 103.4834  | 0.2010  | 0.505790 |
| Hars          | chr18:36766529-36783205   | 57.7898   | 55.2175   | -0.0657 | 0.735917 |
| Slc5a10       | chr11:61672780-61720826   | 2.7360    | 3.2560    | 0.2510  | 0.615782 |
| Rpn1          | chr6:88084472-88105304    | 54.0103   | 52.2409   | -0.0481 | 0.714448 |
| Cebpg         | chr7:35046421-35056503    | 18.0069   | 17.2988   | -0.0579 | 0.638885 |
| Mgat5         | chr1:127204985-127483704  | 15.9617   | 15.3209   | -0.0591 | 0.474417 |
| Hnrnp1        | chr4:136310941-136342968  | 24.9367   | 24.0939   | -0.0496 | 0.650691 |
| 1190005I06Rik | chr8:120608601-120647632  | 0.9254    | 0.6198    | -0.5784 | 0.613758 |
| Gm2735        | chr9:59844326-59844603    | 1.9087    | 2.9979    | 0.6514  | 0.430943 |
| Gm20033       | chr5:64708206-64804117    | 2.5149    | 2.9802    | 0.2449  | 0.533457 |
| Rpl8          | chr15:76904070-76906318   | 1035.3445 | 1108.0491 | 0.0979  | 0.709116 |
| Sh3pxd2a      | chr19:47260173-47464411   | 4.1117    | 4.4302    | 0.1076  | 0.478937 |
| Hmgn2         | chr4:133964737-133968650  | 4.4516    | 4.9230    | 0.1452  | 0.313091 |
| Rpap3         | chr15:97675104-97705822   | 23.4040   | 22.2636   | -0.0721 | 0.619718 |
| Ntng2         | chr2:29194793-29253005    | 6.1281    | 6.7665    | 0.1430  | 0.609420 |
| Zswim1        | chr2:164822685-164826871  | 4.8583    | 4.4459    | -0.1280 | 0.480832 |
| C1qtnf4       | chr2:90885859-90890525    | 0.6325    | 0.9468    | 0.5820  | 0.491583 |
| Mir5132       | chrX:74023527-74023598    | 11.6154   | 6.9689    | -0.7370 | 0.583264 |
| Nop14         | chr5:34638531-34660148    | 22.2440   | 21.0665   | -0.0785 | 0.722753 |
| Gbp4          | chr5:105115766-105139586  | 68.9864   | 73.4104   | 0.0897  | 0.673740 |
| Kcnab2        | chr4:152390741-152477871  | 34.0379   | 35.9757   | 0.0799  | 0.556315 |
| Nf1           | chr11:79339692-79581612   | 2.0826    | 2.3135    | 0.1517  | 0.688455 |
| 4933408J17Rik | chr10:93589412-93605245   | 1.1162    | 0.8017    | -0.4774 | 0.559219 |
| Pde6b         | chr5:108388390-108432397  | 1.4678    | 1.2922    | -0.1839 | 0.608246 |
| Aif1          | chr17:35170990-35176068   | 0.8648    | 0.5937    | -0.5426 | 0.649994 |
| Gm26546       | chr10:88379243-88383711   | 1.4592    | 1.2284    | -0.2483 | 0.732767 |
| Gm12000       | chr11:11695132-11696439   | 20.6563   | 18.4089   | -0.1662 | 0.718003 |
| Eml6          | chr11:29743047-30026033   | 0.6845    | 0.5946    | -0.2030 | 0.624444 |
| Wrap53        | chr11:69561757-69580255   | 11.1802   | 12.4752   | 0.1581  | 0.605144 |
| Fxr2          | chr11:69632989-69653297   | 24.2566   | 23.3913   | -0.0524 | 0.574783 |
| Glrx5         | chr12:105032688-105040910 | 28.1922   | 31.0444   | 0.1390  | 0.618359 |
| Slc25a47      | chr12:108851128-108856814 | 1.8212    | 1.4854    | -0.2940 | 0.556575 |
| Polr2b        | chr5:77310146-77349324    | 51.7829   | 50.1564   | -0.0460 | 0.690752 |
| Cd151         | chr7:141467361-141471479  | 11.0453   | 12.1289   | 0.1350  | 0.544986 |
| Ipo5          | chr14:120911193-120948042 | 54.5588   | 51.9556   | -0.0705 | 0.795927 |
| 4930481A15Rik | chr19:5406739-5422847     | 4.6807    | 5.2532    | 0.1665  | 0.440654 |
| Rfx3          | chr19:27761720-28011166   | 2.6210    | 2.8396    | 0.1156  | 0.443314 |
| Rel2          | chr18:37955078-37959179   | 4.8428    | 4.4475    | -0.1228 | 0.615887 |
| Ctso          | chr3:81932600-81956725    | 13.6684   | 14.5298   | 0.0882  | 0.325454 |
| Zfp687        | chr3:95006589-95015448    | 13.0272   | 12.4653   | -0.0636 | 0.678536 |
| 9530052C20Rik | chr3:142882494-142894644  | 0.2953    | 0.4670    | 0.6610  | 0.487119 |
| Efr3a         | chr15:65787033-65873816   | 23.9219   | 25.3301   | 0.0825  | 0.609874 |
| Mrpl14        | chr17:45686321-45698495   | 7.6223    | 8.7241    | 0.1948  | 0.514739 |

|               |                           |           |           |         |          |
|---------------|---------------------------|-----------|-----------|---------|----------|
| Tgm2          | chr2:158116401-158146436  | 1.6193    | 1.4067    | -0.2030 | 0.646833 |
| Slbp          | chr5:33634951-33652574    | 20.9590   | 22.5481   | 0.1054  | 0.643840 |
| Gbp8          | chr5:105014152-105139540  | 38.6947   | 41.7047   | 0.1081  | 0.673420 |
| Plekhg1       | chr10:3740363-3967303     | 0.2613    | 0.2007    | -0.3807 | 0.700906 |
| Wdr18         | chr10:79960151-79969246   | 19.7075   | 18.6395   | -0.0804 | 0.739854 |
| Gls2          | chr10:128194456-128210004 | 0.5143    | 0.3992    | -0.3657 | 0.430985 |
| Nrde2         | chr12:100125451-100159653 | 16.5191   | 17.6875   | 0.0986  | 0.555422 |
| Dhx29         | chr13:112927729-112969431 | 15.6996   | 14.9076   | -0.0747 | 0.732648 |
| Magi2         | chr5:20702276-20706049    | 1.5476    | 1.0491    | -0.5608 | 0.596092 |
| Crbn          | chr6:106778248-106800074  | 47.8914   | 50.5517   | 0.0780  | 0.556624 |
| Clasrp        | chr7:19581043-19604468    | 20.7107   | 19.4079   | -0.0937 | 0.726270 |
| 4921522P10Rik | chr8:8661800-8664728      | 0.8692    | 0.6628    | -0.3909 | 0.575004 |
| Nacc1         | chr8:84670482-84687862    | 15.9463   | 17.0392   | 0.0956  | 0.541880 |
| Trappc2l      | chr8:122611625-122615588  | 34.5251   | 32.0171   | -0.1088 | 0.588761 |
| Parp6         | chr9:59617283-59650290    | 14.8408   | 13.8994   | -0.0945 | 0.735167 |
| Lysmd2        | chr9:75625731-75637773    | 7.7889    | 8.9255    | 0.1965  | 0.585586 |
| Tbc1d25       | chrX:8154471-8176181      | 3.9888    | 3.6002    | -0.1479 | 0.584719 |
| Mfsd5         | chr15:102279455-102281744 | 20.0200   | 18.6892   | -0.0992 | 0.715093 |
| Fam160b2      | chr14:70583295-70599835   | 5.8260    | 5.3947    | -0.1110 | 0.685318 |
| Gm21844       | chr19:4801511-4805784     | 15.1055   | 13.4926   | -0.1629 | 0.629977 |
| B3gat3        | chr19:8920373-8927234     | 29.0851   | 31.3769   | 0.1094  | 0.585740 |
| Rb1cc1        | chr1:6206196-6276648      | 13.6254   | 14.4539   | 0.0852  | 0.609348 |
| Gm14453       | chr2:173025684-173034580  | 27.2722   | 25.2557   | -0.1108 | 0.278315 |
| Mast2         | chr4:116306761-116464183  | 5.6490    | 5.3647    | -0.0745 | 0.615287 |
| Mir704        | chr6:47803575-47803652    | 52.8051   | 70.4241   | 0.4154  | 0.623370 |
| Cdc42bpa      | chr1:179960471-180165603  | 0.1093    | 0.0751    | -0.5407 | 0.716791 |
| Arel1         | chr12:84918147-84970900   | 40.4598   | 39.3777   | -0.0391 | 0.659881 |
| Cox18         | chr5:90214723-90224001    | 11.2138   | 10.4778   | -0.0979 | 0.542046 |
| Dpy19l3       | chr7:35685164-35754454    | 3.5898    | 3.4176    | -0.0709 | 0.549574 |
| Dctpp1        | chr7:127256958-127260709  | 34.8154   | 31.3923   | -0.1493 | 0.735770 |
| Ath1l         | chr7:140941390-140947664  | 16.2719   | 17.6946   | 0.1209  | 0.655325 |
| Mpi           | chr9:57544255-57552763    | 5.6610    | 6.2200    | 0.1359  | 0.455554 |
| Taf8          | chr17:47488049-47502287   | 23.8732   | 25.5021   | 0.0952  | 0.559255 |
| Mms19         | chr19:41941085-41981157   | 15.1796   | 14.6833   | -0.0480 | 0.696580 |
| As3mt         | chr19:46707442-46741095   | 4.9999    | 5.7034    | 0.1899  | 0.498696 |
| Rfwd2         | chr1:159232325-159347580  | 5.9597    | 5.5365    | -0.1063 | 0.714327 |
| Ptpn2         | chr18:67665510-67724595   | 31.6977   | 33.9757   | 0.1001  | 0.645747 |
| Plod1         | chr4:147909752-147936767  | 1.5578    | 1.3907    | -0.1637 | 0.661184 |
| Gpr182        | chr10:127747275-127751732 | 0.5204    | 0.7142    | 0.4567  | 0.623198 |
| Gm10039       | chr11:100361617-100362151 | 2.4269    | 3.4709    | 0.5162  | 0.579272 |
| Lsm5          | chr6:56701062-56704692    | 2.1006    | 2.9418    | 0.4859  | 0.567717 |
| Qrfp          | chr2:31806165-31810580    | 0.7890    | 0.5998    | -0.3955 | 0.643094 |
| Slc25a35      | chr11:68968130-68974365   | 1.4707    | 1.2739    | -0.2073 | 0.528012 |
| Clec7a        | chr6:129461590-129472777  | 0.2029    | 0.3336    | 0.7177  | 0.526920 |
| Ankrd24       | chr10:81628539-81647610   | 1.1165    | 0.7156    | -0.6417 | 0.556612 |
| Dhrs9         | chr2:69380444-69404533    | 0.2029    | 0.1115    | -0.8644 | 0.656388 |
| Zdhhc14       | chr17:5492599-5753891     | 0.4360    | 0.3077    | -0.5029 | 0.604314 |
| Slc35a2       | chrX:7884040-7894492      | 5.6868    | 5.2501    | -0.1153 | 0.583037 |
| Tmem243       | chr5:9100736-9118983      | 44.9429   | 48.4667   | 0.1089  | 0.613387 |
| Ddx10         | chr9:53098453-53248112    | 32.8365   | 31.2526   | -0.0713 | 0.772439 |
| Traj45        | chr14:54172827-54172890   | 22.6740   | 16.1671   | -0.4880 | 0.577293 |
| Tfcp2l1       | chr1:118627944-118685167  | 0.0677    | 0.1186    | 0.8086  | 0.553283 |
| Fam185a       | chr5:21424957-21482124    | 4.0712    | 3.7482    | -0.1193 | 0.619704 |
| Slc25a13      | chr6:6041217-6217118      | 5.5595    | 6.0962    | 0.1330  | 0.404314 |
| Trbv4         | chr6:41059442-41059881    | 45.9691   | 53.4208   | 0.2167  | 0.681993 |
| Stk38l        | chr6:146724994-146778812  | 2.1527    | 2.4403    | 0.1809  | 0.521683 |
| Cd22          | chr7:30865401-30880342    | 3.2678    | 3.8404    | 0.2329  | 0.740590 |
| Aqp11         | chr7:97726378-97738247    | 0.6953    | 1.0301    | 0.5670  | 0.675347 |
| Cdc16         | chr8:13757675-13781938    | 22.8016   | 21.4220   | -0.0900 | 0.787690 |
| 2610005L07Rik | chr8:20267773-20424814    | 0.3320    | 0.2462    | -0.4314 | 0.617326 |
| Vdac3         | chr8:22577074-22593813    | 11.1975   | 10.3054   | -0.1198 | 0.631815 |
| Dnaaf1        | chr8:119575234-119598454  | 3.9176    | 3.5495    | -0.1424 | 0.557115 |
| Sik3          | chr9:46012819-46224194    | 7.3424    | 7.9818    | 0.1205  | 0.676920 |
| Rpl4          | chr9:64173386-64178562    | 1052.3277 | 1118.1418 | 0.0875  | 0.698064 |
| Golga4        | chr9:118506317-118582522  | 31.0250   | 30.2300   | -0.0375 | 0.589324 |
| Eif3d         | chr15:77958997-77970824   | 130.2446  | 125.2073  | -0.0569 | 0.774631 |
| Tef           | chr15:81802420-81826861   | 7.7726    | 8.3501    | 0.1034  | 0.641792 |
| Asic1         | chr15:99670717-99701127   | 1.2043    | 1.0047    | -0.2614 | 0.550597 |
| Slc22a2       | chr17:12584188-12628465   | 0.9169    | 0.7077    | -0.3737 | 0.604581 |
| Ide           | chr19:37268742-37337852   | 29.4615   | 30.9281   | 0.0701  | 0.309685 |
| Rab3gap2      | chr1:185204167-185286743  | 15.4528   | 16.4092   | 0.0866  | 0.514786 |

|               |                           |          |          |         |          |
|---------------|---------------------------|----------|----------|---------|----------|
| Gm27026       | chr18:52472847-52473739   | 3.3527   | 2.7307   | -0.2961 | 0.580304 |
| Gucy1b3       | chr3:82032003-82074711    | 0.8956   | 1.1073   | 0.3061  | 0.567495 |
| Cd1d2         | chr3:86986585-86989533    | 0.8169   | 0.5428   | -0.5897 | 0.528736 |
| Cdk5rap2      | chr4:70216855-70410443    | 7.6738   | 7.3916   | -0.0541 | 0.660827 |
| Nfyc          | chr4:120757437-120831572  | 9.9554   | 10.7121  | 0.1057  | 0.183862 |
| Utp11l        | chr4:124678159-124693600  | 10.5106  | 11.4083  | 0.1182  | 0.653950 |
| Perm1         | chr4:156215926-156221307  | 1.6357   | 1.4452   | -0.1787 | 0.479928 |
| AA465934      | chr11:83291698-83294632   | 5.5893   | 4.2945   | -0.3802 | 0.633375 |
| 1810010H24Rik | chr11:107028117-107030443 | 1.6787   | 1.2177   | -0.4631 | 0.602838 |
| Ly86          | chr13:37345344-37419036   | 0.7497   | 1.2020   | 0.6810  | 0.542295 |
| Gm24004       | chr9:95934612-95934790    | 2.6392   | 4.5211   | 0.7766  | 0.596014 |
| Bik           | chr15:83526861-83544635   | 1.0495   | 1.5380   | 0.5513  | 0.527514 |
| Nfe2          | chr15:103248211-103258403 | 0.4939   | 0.3480   | -0.5054 | 0.599738 |
| Trav10n       | chr14:53122113-53122610   | 3.0957   | 4.8260   | 0.6406  | 0.675742 |
| Ier3          | chr17:35821683-35822923   | 1.1212   | 1.5843   | 0.4988  | 0.515569 |
| Eif3h         | chr15:51786557-51865481   | 128.6538 | 138.2708 | 0.1040  | 0.705242 |
| F830016B08Rik | chr18:60293379-60303016   | 4.1052   | 3.6832   | -0.1565 | 0.737886 |
| ApoH          | chr11:108343353-108414396 | 2.5413   | 2.9955   | 0.2373  | 0.422087 |
| Gm17518       | chr16:90727511-90729120   | 0.5681   | 0.3474   | -0.7096 | 0.512079 |
| Zyg11b        | chr4:108229723-108301096  | 20.8056  | 21.9739  | 0.0788  | 0.556994 |
| Cuta          | chr17:26937972-26939478   | 39.7710  | 42.8700  | 0.1082  | 0.035372 |
| UbtD2         | chr11:32455369-32516687   | 4.0430   | 3.4430   | -0.2318 | 0.530955 |
| Rpl23         | chr11:9777526-97782437    | 105.3008 | 113.8570 | 0.1127  | 0.721209 |
| Eif2s1        | chr12:78861818-78887010   | 38.5583  | 36.6487  | -0.0733 | 0.788028 |
| Gm15421       | chr5:22528320-22528719    | 2.0076   | 1.2584   | -0.6739 | 0.586897 |
| Kdm5a         | chr6:120364098-120444574  | 26.5370  | 25.8702  | -0.0367 | 0.666494 |
| 2310057M21Rik | chr7:131342717-131362698  | 5.1342   | 4.6260   | -0.1504 | 0.589724 |
| Mapk1ip1      | chr7:138835822-138846273  | 7.5966   | 7.0034   | -0.1173 | 0.539486 |
| Zfp560        | chr9:20345135-20385177    | 2.9148   | 2.6695   | -0.1268 | 0.631706 |
| Psmd10        | chrX:140948428-140956728  | 16.7638  | 15.5080  | -0.1123 | 0.711528 |
| Gm26874       | chr19:57459571-57461553   | 0.7188   | 0.4668   | -0.6226 | 0.633541 |
| Gm6085        | chr1:4687933-4689403      | 9.1047   | 10.2858  | 0.1760  | 0.614653 |
| Rsg1          | chr4:141213955-141226756  | 1.0587   | 0.7636   | -0.4714 | 0.656790 |
| Syne1         | chr10:5336948-5550692     | 0.2265   | 0.1601   | -0.5009 | 0.676026 |
| Gm12846       | chr4:98664365-98666137    | 0.4066   | 0.6771   | 0.7356  | 0.674541 |
| Anapc16       | chr10:59987408-60003135   | 13.5804  | 14.4664  | 0.0912  | 0.537000 |
| Ddhd2         | chr8:25725323-25754280    | 14.9795  | 15.9712  | 0.0925  | 0.499944 |
| Ttc7          | chr17:87282885-87381769   | 16.4213  | 17.5947  | 0.0996  | 0.669689 |
| Ube2v2        | chr16:15552676-15594524   | 3.2740   | 3.6629   | 0.1619  | 0.628530 |
| Gm14230       | chr2:156833048-156839892  | 2.0111   | 1.5681   | -0.3589 | 0.634358 |
| Gm24468       | chr4:101186763-101186867  | 11.2241  | 7.1702   | -0.6465 | 0.595588 |
| Gm9816        | chr16:62716952-62718810   | 0.3227   | 0.5218   | 0.6934  | 0.536219 |
| Adi1          | chr12:28675230-28682175   | 4.9407   | 5.6806   | 0.2013  | 0.621828 |
| Fbxw17        | chr13:50417863-50433780   | 5.1838   | 5.6858   | 0.1334  | 0.534476 |
| Atg9b         | chr5:24384180-24392143    | 1.8782   | 1.6671   | -0.1719 | 0.587235 |
| Mpv17         | chr5:31140659-31158153    | 5.4774   | 5.9996   | 0.1314  | 0.382919 |
| Sgcb          | chr5:73632748-73647713    | 4.3387   | 3.8839   | -0.1597 | 0.772111 |
| Qpctl         | chr7:19140216-19149196    | 3.9426   | 4.5847   | 0.2177  | 0.639031 |
| Ube4a         | chr9:44923130-44965600    | 11.7462  | 11.3982  | -0.0434 | 0.270831 |
| Idh3g         | chrX:73778962-73786897    | 43.5280  | 46.1778  | 0.0853  | 0.592776 |
| Mpp1          | chrX:75109732-75131016    | 15.6451  | 15.0112  | -0.0597 | 0.704006 |
| Serac1        | chr17:6042195-6079741     | 2.1437   | 1.9154   | -0.1625 | 0.655715 |
| Mrpl18        | chr17:12911348-12916345   | 34.2734  | 32.2780  | -0.0865 | 0.721311 |
| Alkbh7        | chr17:56997338-56999322   | 7.4100   | 8.5462   | 0.2058  | 0.615550 |
| Sfxn4         | chr19:60837276-60861479   | 1.8685   | 2.2473   | 0.2663  | 0.705450 |
| Cdc123        | chr2:5794293-5845164      | 15.5670  | 16.6913  | 0.1006  | 0.551784 |
| Ptpn22        | chr3:103859794-103912247  | 58.4290  | 61.5465  | 0.0750  | 0.486050 |
| Cpne3         | chr4:19519253-19570108    | 12.2990  | 12.9938  | 0.0793  | 0.326974 |
| Klhdc8b       | chr9:108447657-108452377  | 0.6149   | 0.8731   | 0.5056  | 0.566526 |
| Traj58        | chr14:54157279-54157342   | 13.2655  | 8.8461   | -0.5846 | 0.488529 |
| Gm13608       | chr2:31985058-31986464    | 1.3671   | 1.7971   | 0.3946  | 0.636695 |
| Nudt16        | chr9:105129337-105131805  | 17.4285  | 18.8025  | 0.1095  | 0.347118 |
| Sec14l1       | chr11:117115167-117159268 | 12.8384  | 13.7375  | 0.0977  | 0.646282 |
| Gm17529       | chr12:58953094-58968011   | 2.8392   | 2.5204   | -0.1718 | 0.659770 |
| Auh           | chr13:52835118-52929681   | 4.6066   | 4.9333   | 0.0988  | 0.476151 |
| Gm21967       | chr13:119606649-119610458 | 2.5626   | 2.0363   | -0.3317 | 0.704617 |
| Rgs12         | chr5:34949444-35039644    | 1.9973   | 2.2184   | 0.1515  | 0.564279 |
| Polr2i        | chr7:30231947-30233390    | 12.6884  | 14.2878  | 0.1713  | 0.668065 |
| Tm2d3         | chr7:65691168-65701913    | 26.3736  | 24.8381  | -0.0865 | 0.717725 |
| Klf2          | chr8:72319032-72321656    | 57.4457  | 54.9853  | -0.0632 | 0.766037 |
| Higd1a        | chr9:121848559-121858000  | 6.1756   | 6.9201   | 0.1642  | 0.523357 |



|               |                           |          |          |         |          |
|---------------|---------------------------|----------|----------|---------|----------|
| Rrm2b         | chr15:37923951-37961318   | 6.0129   | 6.5620   | 0.1261  | 0.651987 |
| Dynl1c        | chr17:6601670-6609774     | 0.5158   | 0.3766   | -0.4538 | 0.564393 |
| Ebi3          | chr17:55952622-55957021   | 6.4883   | 7.5788   | 0.2241  | 0.652173 |
| Ctsw          | chr19:5465239-5468498     | 37.2967  | 40.1362  | 0.1059  | 0.572744 |
| Fam160b1      | chr19:57361008-57389594   | 15.6096  | 14.9494  | -0.0623 | 0.725122 |
| Stk25         | chr1:93621901-93635722    | 26.5719  | 25.4229  | -0.0638 | 0.747017 |
| AW554918      | chr18:25168998-25467321   | 3.5794   | 3.2598   | -0.1349 | 0.749995 |
| Blcap         | chr2:157556361-157571274  | 5.0190   | 4.6475   | -0.1109 | 0.516067 |
| C1qtnf9       | chr14:60768133-60780869   | 0.5762   | 0.3854   | -0.5801 | 0.633605 |
| 1810059H22Rik | chr5:148953747-148970122  | 0.3792   | 0.2762   | -0.4570 | 0.528185 |
| Gm14277       | chr2:157168819-157169179  | 3.6941   | 2.3838   | -0.6320 | 0.690366 |
| Gm16060       | chr3:138828684-138829162  | 2.4849   | 1.6686   | -0.5745 | 0.713644 |
| Gm12785       | chr4:101210415-101210587  | 4.0028   | 6.2033   | 0.6320  | 0.586904 |
| Fpgs          | chr2:32682608-32704137    | 4.8696   | 4.5027   | -0.1130 | 0.670183 |
| Epb4.1l5      | chr1:119545032-119649000  | 0.1748   | 0.1252   | -0.4809 | 0.663287 |
| Zfp808        | chr13:62129915-62173419   | 2.1113   | 2.4389   | 0.2081  | 0.485335 |
| Mgat1         | chr11:49244190-49263030   | 19.0892  | 20.2426  | 0.0846  | 0.535361 |
| Ltb4r1        | chr14:55765961-55768494   | 1.3126   | 1.6328   | 0.3149  | 0.226832 |
| Gnl1          | chr17:35979850-35989462   | 29.7237  | 28.6778  | -0.0517 | 0.668931 |
| Gm5578        | chr6:112605543-112606779  | 0.7132   | 1.0832   | 0.6030  | 0.583542 |
| Gm15658       | chr16:33770429-33787112   | 5.3613   | 6.8690   | 0.3575  | 0.679600 |
| Cipc          | chr12:86947342-86965362   | 9.9675   | 9.3665   | -0.0897 | 0.756041 |
| A530083I20Rik | chr9:122885079-122903184  | 2.2619   | 1.9893   | -0.1853 | 0.645837 |
| Dnm1l         | chr16:16312234-16359030   | 36.9360  | 35.7842  | -0.0457 | 0.668257 |
| Gtf3c3        | chr1:54397580-54438971    | 17.3882  | 16.5159  | -0.0743 | 0.719676 |
| Mid1          | chrX:169685198-170005736  | 0.4391   | 0.5536   | 0.3343  | 0.626700 |
| Kcnmb4os1     | chr10:116418051-116421237 | 1.5144   | 2.1048   | 0.4749  | 0.628035 |
| Srr           | chr11:74906358-74925948   | 12.7554  | 13.6270  | 0.0954  | 0.516112 |
| Stat5a        | chr11:100859350-100885169 | 21.9299  | 21.2881  | -0.0429 | 0.672360 |
| Cenph         | chr13:100759673-100775899 | 5.2397   | 4.6905   | -0.1598 | 0.609406 |
| Myo7a         | chr7:98051059-98119524    | 0.9235   | 1.0611   | 0.2004  | 0.617580 |
| Spcc3         | chr8:54520432-54529998    | 61.6253  | 59.5003  | -0.0506 | 0.759518 |
| Il2rg         | chrX:101264377-101268255  | 143.8727 | 150.8397 | 0.0682  | 0.477778 |
| Klh124        | chr16:20097553-20127744   | 25.9831  | 27.4502  | 0.0792  | 0.570979 |
| Gm10143       | chr19:10198367-10202384   | 21.5645  | 22.9770  | 0.0915  | 0.561179 |
| Ypel4         | chr2:84734057-84738655    | 1.0824   | 0.8690   | -0.3168 | 0.655223 |
| Gm12868       | chr4:119133748-119138801  | 6.7397   | 5.3369   | -0.3367 | 0.664444 |
| Gm11604       | chr11:98185365-98186107   | 1.8052   | 1.2780   | -0.4983 | 0.554525 |
| Nnat          | chr2:157560077-157562522  | 1.3093   | 0.9077   | -0.4371 | 0.701993 |
| Med23         | chr10:24869985-24913681   | 17.7869  | 17.1378  | -0.0536 | 0.726127 |
| Pqlc3         | chr12:16988647-17000408   | 10.6933  | 11.4653  | 0.1006  | 0.600609 |
| Gm15560       | chr10:7808115-7808758     | 3.0771   | 2.2115   | -0.4766 | 0.710369 |
| Gm11529       | chr11:96448322-96464547   | 2.6875   | 2.1059   | -0.3518 | 0.516266 |
| Ten1          | chr11:116198854-116215318 | 6.6544   | 7.2626   | 0.1262  | 0.399520 |
| Cdo1          | chr18:46713204-46728342   | 0.9920   | 1.4136   | 0.5110  | 0.595823 |
| Gm10355       | chr3:101306560-101307079  | 1.5508   | 0.8932   | -0.7960 | 0.524074 |
| Mfsd10        | chr5:34633641-34637212    | 10.2679  | 11.1981  | 0.1251  | 0.635627 |
| Mrpl34        | chr8:71464925-71465752    | 28.6762  | 31.7013  | 0.1447  | 0.605950 |
| Elmod2        | chr8:83312631-83332486    | 3.4082   | 3.2396   | -0.0732 | 0.590121 |
| Ndufaf3       | chr9:108565865-108567342  | 15.1590  | 16.9467  | 0.1608  | 0.687864 |
| Ccny          | chr18:9314043-9450150     | 35.8635  | 38.0062  | 0.0837  | 0.603367 |
| Slc35a4       | chr18:36679578-36683858   | 12.9516  | 13.9978  | 0.1121  | 0.588028 |
| 2500004C02Rik | chr2:153341156-153346073  | 4.3144   | 3.8921   | -0.1486 | 0.553366 |
| Bbs10         | chr10:111298678-111301736 | 3.5009   | 4.0309   | 0.2034  | 0.626761 |
| Zbtb39        | chr10:127739537-127747335 | 2.2910   | 2.5416   | 0.1498  | 0.509782 |
| Gm12319       | chr11:70654740-70656493   | 7.4748   | 6.0147   | -0.3135 | 0.582673 |
| Med31         | chr11:72211723-72215592   | 4.9360   | 5.5440   | 0.1676  | 0.339751 |
| Pitpna        | chr11:75588096-75628804   | 39.7626  | 41.8524  | 0.0739  | 0.491635 |
| Rhot1         | chr11:80209018-80267907   | 12.2290  | 11.8394  | -0.0467 | 0.459706 |
| NA            | chr11:87443236-87443450   | 5.1493   | 3.6761   | -0.4862 | 0.587596 |
| Abi3          | chr11:95830073-95842476   | 7.7284   | 7.0938   | -0.1236 | 0.789412 |
| Sgsh          | chr11:119343424-119355536 | 8.9637   | 9.8019   | 0.1290  | 0.654501 |
| Mbip          | chr12:56328305-56345894   | 13.3270  | 15.0167  | 0.1722  | 0.682844 |
| Atp5s         | chr12:69724961-69744658   | 2.7095   | 3.1916   | 0.2363  | 0.537148 |
| Sav1          | chr12:69965011-69987002   | 18.2682  | 17.3318  | -0.0759 | 0.711310 |
| Gtf2a1        | chr12:91555915-91590487   | 9.3000   | 8.7151   | -0.0937 | 0.768995 |
| Ptcd2         | chr13:99319648-99344678   | 23.7974  | 22.6195  | -0.0732 | 0.637800 |
| NA            | chr13:106833859-106847267 | 4.3526   | 3.8543   | -0.1754 | 0.597721 |
| Aldh2         | chr5:121566026-121593824  | 1.8336   | 2.0728   | 0.1769  | 0.559258 |
| 5730422E09Rik | chr5:149119564-149184063  | 0.9118   | 0.6840   | -0.4148 | 0.614951 |
| Acn9          | chr6:6956003-7042979      | 0.6779   | 0.8126   | 0.2615  | 0.561518 |

|               |                           |          |          |         |          |
|---------------|---------------------------|----------|----------|---------|----------|
| Trbv23        | chr6:41216072-41216526    | 6.3803   | 7.8259   | 0.2946  | 0.364553 |
| Serbp1        | chr6:67266978-67289302    | 110.6233 | 106.3160 | -0.0573 | 0.811271 |
| Lrig1         | chr6:94604528-94700158    | 35.2274  | 36.9114  | 0.0674  | 0.401460 |
| Atg7          | chr6:114643096-114860614  | 8.4595   | 9.0111   | 0.0911  | 0.320531 |
| Gm20692       | chr6:120512448-120513232  | 6.5946   | 7.6497   | 0.2141  | 0.381884 |
| Gm15545       | chr7:44986899-44994597    | 6.6033   | 6.0483   | -0.1266 | 0.601269 |
| Nucb1         | chr7:45492873-45510406    | 27.0576  | 26.0424  | -0.0552 | 0.763521 |
| Uevld         | chr7:46923538-46958527    | 1.1594   | 1.0314   | -0.1688 | 0.691565 |
| Taf10         | chr7:105739392-105744361  | 34.2344  | 35.9579  | 0.0709  | 0.443975 |
| Cd2bp2        | chr7:127191659-127196000  | 45.6304  | 44.0275  | -0.0516 | 0.757630 |
| Dhcr7         | chr7:143823144-143848410  | 4.9899   | 4.5837   | -0.1225 | 0.691862 |
| Wrrn          | chr8:33234383-33385527    | 21.5801  | 20.9232  | -0.0446 | 0.618761 |
| Cdk10         | chr8:123224840-123232250  | 14.0852  | 13.0595  | -0.1091 | 0.728978 |
| Pcnx12        | chr8:125751508-125898293  | 0.3123   | 0.2493   | -0.3254 | 0.608983 |
| Chek1         | chr9:36708481-36727065    | 4.5431   | 4.1748   | -0.1220 | 0.752532 |
| Ctsh          | chr9:90054151-90076089    | 0.4773   | 0.9220   | 0.9498  | 0.472439 |
| Zcchc12       | chrX:36195903-36199158    | 0.4789   | 0.6322   | 0.4006  | 0.481620 |
| Nono          | chrX:101429317-101448591  | 56.5548  | 59.3913  | 0.0706  | 0.525533 |
| Ywhaz         | chr15:36770769-36794547   | 29.0936  | 28.0990  | -0.0502 | 0.684433 |
| Trmt12        | chr15:58872648-58876781   | 4.5569   | 5.0480   | 0.1477  | 0.657271 |
| Aco2          | chr15:81872308-81915133   | 51.2171  | 49.8411  | -0.0393 | 0.666452 |
| Letmd1        | chr15:100469033-100479252 | 16.4243  | 17.7089  | 0.1086  | 0.570709 |
| Mir3076       | chr14:30572148-30572208   | 64.6900  | 49.9326  | -0.3736 | 0.630829 |
| Gm15932       | chr14:55567218-55575991   | 12.4076  | 14.2132  | 0.1960  | 0.501076 |
| Gnrh1         | chr14:67745228-67749435   | 3.5254   | 2.7569   | -0.3548 | 0.534900 |
| Snora31       | chr14:75847904-75848034   | 20.5550  | 16.8700  | -0.2850 | 0.590540 |
| Klc4          | chr17:46630630-46645144   | 10.1918  | 9.3906   | -0.1181 | 0.751608 |
| Gm26675       | chr16:3862383-3884505     | 12.8236  | 11.8028  | -0.1197 | 0.721598 |
| Sdf2l1        | chr16:17130137-17132383   | 19.9636  | 21.7828  | 0.1258  | 0.547067 |
| Bdh1          | chr16:31422279-31458901   | 10.6731  | 11.4553  | 0.1020  | 0.513734 |
| 4930453N24Rik | chr16:64751750-64771161   | 18.6233  | 17.9785  | -0.0508 | 0.706435 |
| Atp5o         | chr16:91684397-91931687   | 45.4362  | 48.4347  | 0.0922  | 0.642052 |
| Npas4         | chr19:4984354-4989971     | 2.1051   | 1.8019   | -0.2244 | 0.724983 |
| Smc5          | chr19:23206440-23273897   | 17.7740  | 19.1240  | 0.1056  | 0.684899 |
| Gm26792       | chr19:46335286-46338538   | 1.3558   | 1.6528   | 0.2858  | 0.668802 |
| Slk           | chr19:47579677-47645246   | 30.4736  | 32.0480  | 0.0727  | 0.565696 |
| Rrs1          | chr1:9545407-9547454      | 11.5571  | 10.8314  | -0.0936 | 0.677124 |
| Tram2         | chr1:20996295-21079229    | 1.4928   | 1.6953   | 0.1836  | 0.604956 |
| Nck2          | chr1:43445750-43570515    | 13.9047  | 13.2579  | -0.0687 | 0.693703 |
| Vps4b         | chr1:106764070-106796728  | 22.2961  | 23.6248  | 0.0835  | 0.604712 |
| B4galt3       | chr1:171270327-171276896  | 5.1946   | 5.6715   | 0.1267  | 0.625034 |
| Exosc2        | chr2:31670714-31681350    | 20.4941  | 19.5027  | -0.0715 | 0.698667 |
| Gm13620       | chr2:60125095-60125819    | 2.0636   | 1.3997   | -0.5601 | 0.551777 |
| Sla2          | chr2:156872456-156887192  | 32.4447  | 34.2435  | 0.0779  | 0.448381 |
| Rprd1b        | chr2:158028496-158132297  | 5.2240   | 5.7602   | 0.1410  | 0.677427 |
| Zfp831        | chr2:174643533-174710832  | 22.6613  | 21.7063  | -0.0621 | 0.805651 |
| Zmat3         | chr3:32334795-32365678    | 1.6568   | 1.5344   | -0.1107 | 0.385950 |
| Otud7b        | chr3:96104526-96161129    | 10.5072  | 11.1338  | 0.0836  | 0.547838 |
| Caap1         | chr4:94500080-94556796    | 4.7947   | 4.4480   | -0.1083 | 0.669379 |
| Hk1os         | chr10:62340255-62363367   | 0.6162   | 0.8783   | 0.5112  | 0.492649 |
| Aldh5a1       | chr13:24907578-24937661   | 0.6364   | 0.8318   | 0.3863  | 0.530302 |
| A730081D07Rik | chr13:40956413-41001151   | 0.2960   | 0.5235   | 0.8225  | 0.626386 |
| C030013D06Rik | chr14:56733656-56734954   | 1.8843   | 1.3636   | -0.4666 | 0.667057 |
| Dnph1         | chr17:46496788-46499618   | 5.6432   | 4.5591   | -0.3078 | 0.756572 |
| Nrp2          | chr1:62703284-62818695    | 0.1001   | 0.1597   | 0.6732  | 0.660478 |
| Gm12097       | chr11:30572790-30574454   | 0.5766   | 0.3781   | -0.6087 | 0.644972 |
| Gfpt2         | chr11:49794177-49838613   | 0.1257   | 0.1913   | 0.6050  | 0.555940 |
| Pdia2         | chr17:26195998-26199087   | 0.3086   | 0.4688   | 0.6034  | 0.447952 |
| Tysnd1        | chr10:61695513-61702773   | 11.7579  | 12.8120  | 0.1239  | 0.594309 |
| Cnot6         | chr11:49671502-49712723   | 21.6628  | 23.0662  | 0.0906  | 0.661803 |
| Osbpl7        | chr11:97050627-97068904   | 7.4105   | 6.9971   | -0.0828 | 0.759398 |
| Rab37         | chr11:115091430-115162236 | 19.0118  | 20.0864  | 0.0793  | 0.494339 |
| Trbv16        | chr6:41151790-41152225    | 70.7910  | 78.7020  | 0.1528  | 0.732373 |
| Dusp11        | chr6:85942267-85961667    | 24.7386  | 24.1598  | -0.0342 | 0.512799 |
| Tulp2         | chr7:45486261-45523632    | 0.5326   | 0.4057   | -0.3929 | 0.633117 |
| A230056P14Rik | chr7:55962530-55980868    | 0.6842   | 0.4752   | -0.5258 | 0.586125 |
| Snora3        | chr7:109520119-109520251  | 26.2097  | 31.7263  | 0.2756  | 0.534548 |
| Gm16982       | chr7:141610065-141613747  | 4.7088   | 4.2977   | -0.1318 | 0.611361 |
| E030037K01Rik | chr8:47713265-47715021    | 2.7842   | 3.3797   | 0.2796  | 0.698674 |
| Gm9988        | chr8:88138078-88138517    | 9.2932   | 7.7828   | -0.2559 | 0.634425 |
| Chd9          | chr8:90828834-91054508    | 14.2770  | 15.1314  | 0.0838  | 0.635143 |

|               |                           |           |           |         |          |
|---------------|---------------------------|-----------|-----------|---------|----------|
| Rbm7          | chr9:48488708-48495330    | 49.0899   | 52.1685   | 0.0878  | 0.584990 |
| C2cd4b        | chr9:67759436-67760929    | 1.0980    | 0.7917    | -0.4718 | 0.598633 |
| Gm20509       | chr9:73103728-73117920    | 3.2406    | 2.1688    | -0.5794 | 0.613898 |
| Zfp251        | chr15:76852147-76871435   | 17.9298   | 17.2362   | -0.0569 | 0.642798 |
| Kdelr3        | chr15:79516407-79527739   | 2.2016    | 1.8079    | -0.2842 | 0.662570 |
| Il17rb        | chr14:29996140-30008896   | 4.8144    | 5.5491    | 0.2049  | 0.705591 |
| Atf6b         | chr17:34647145-34655074   | 16.7425   | 15.9977   | -0.0657 | 0.643404 |
| Tomm6         | chr17:47686645-47688386   | 16.6631   | 15.2238   | -0.1303 | 0.732041 |
| Cmss1         | chr16:57302198-57606825   | 6.9474    | 6.1652    | -0.1723 | 0.616158 |
| Hells         | chr19:38930914-38971051   | 14.0891   | 13.5346   | -0.0579 | 0.741621 |
| 0610009E02Rik | chr2:26445695-26459390    | 11.4542   | 10.3337   | -0.1485 | 0.784311 |
| Psm14         | chr2:61711693-61800376    | 43.7811   | 46.4824   | 0.0864  | 0.627379 |
| Spata2        | chr2:167481132-167492887  | 5.0729    | 4.7712    | -0.0885 | 0.553620 |
| Eif2b3        | chr4:117019401-117087306  | 3.9232    | 3.7057    | -0.0823 | 0.569020 |
| Ston2         | chr12:91638541-91788387   | 0.2082    | 0.2975    | 0.5151  | 0.668644 |
| Tubb2b        | chr13:34127007-34130354   | 1.4348    | 1.9270    | 0.4255  | 0.636600 |
| Rps27         | chr3:90212724-90213615    | 8.9025    | 11.9990   | 0.4306  | 0.619398 |
| Sesn3         | chr9:14276300-14326138    | 52.9670   | 55.6190   | 0.0705  | 0.239885 |
| Mrpl30        | chr1:37890476-37898535    | 26.0390   | 28.1965   | 0.1148  | 0.681426 |
| Dock2         | chr11:34226814-34783892   | 113.7129  | 110.7889  | -0.0376 | 0.787825 |
| Gm25364       | chr11:115601655-115601762 | 7.8666    | 4.8115    | -0.7093 | 0.661015 |
| Cfp           | chrX:20925453-20931555    | 2.6536    | 3.1325    | 0.2394  | 0.538478 |
| Fam26f        | chr10:34126068-34127972   | 8.4083    | 9.4659    | 0.1709  | 0.559768 |
| Fam207a       | chr10:77486655-77515813   | 18.8196   | 20.1699   | 0.1000  | 0.583387 |
| Snrpf         | chr10:93583028-93589706   | 17.4808   | 15.9943   | -0.1282 | 0.682384 |
| Nr2c1         | chr10:94148022-94197211   | 2.6534    | 2.4177    | -0.1342 | 0.631006 |
| Snrnp25       | chr11:32205414-32208984   | 11.0508   | 12.3615   | 0.1617  | 0.623680 |
| Lrrc75aos2    | chr11:62605765-62607748   | 3.6526    | 4.4282    | 0.2778  | 0.644239 |
| Fam58b        | chr11:78750506-78751729   | 14.9487   | 16.5164   | 0.1439  | 0.613257 |
| Evi2a         | chr11:79526559-79530609   | 9.7949    | 10.6288   | 0.1179  | 0.484165 |
| 5033430I15Rik | chr13:45965252-45966500   | 5.1245    | 6.1433    | 0.2616  | 0.576286 |
| Supt7l        | chr5:31514568-31527807    | 6.5722    | 6.2580    | -0.0707 | 0.638871 |
| Gak           | chr5:108569410-108629739  | 38.5525   | 40.5538   | 0.0730  | 0.556197 |
| Gm15559       | chr5:110770948-110779260  | 2.7130    | 2.4188    | -0.1656 | 0.437159 |
| Gtf2ird1      | chr5:134357668-134456716  | 2.9466    | 3.2951    | 0.1613  | 0.654208 |
| Actb          | chr5:142903114-142906754  | 3285.1485 | 3441.8145 | 0.0672  | 0.631889 |
| Gm20426       | chr6:90231727-90232788    | 4.5003    | 3.0942    | -0.5404 | 0.608534 |
| Atf5          | chr7:44812256-44816658    | 2.0935    | 1.7618    | -0.2489 | 0.579027 |
| Tfdp1         | chr8:13339673-13377702    | 36.9620   | 35.1232   | -0.0736 | 0.756826 |
| Ap1g1         | chr8:109778553-109861358  | 21.9131   | 21.2512   | -0.0442 | 0.564315 |
| Aars          | chr8:111033143-111057664  | 19.1821   | 18.6764   | -0.0385 | 0.682973 |
| Rps25         | chr9:44407713-44410405    | 32.7138   | 30.0835   | -0.1209 | 0.760868 |
| Fam35a        | chr14:34237040-34310503   | 8.8845    | 9.5718    | 0.1075  | 0.522679 |
| H2-Ob         | chr17:34238902-34245907   | 13.9041   | 14.9788   | 0.1074  | 0.623112 |
| Twsg1         | chr17:65923065-65951187   | 37.3149   | 39.6230   | 0.0866  | 0.660595 |
| Tango2        | chr16:18300824-18348103   | 3.7460    | 3.4434    | -0.1216 | 0.784510 |
| Accs2os       | chr2:155547039-155556930  | 3.4580    | 2.7693    | -0.3204 | 0.608869 |
| mt-Te         | chrM:14070-14139          | 60.3624   | 73.3212   | 0.2806  | 0.614840 |
| Bbs12         | chr3:37312553-37321453    | 6.6728    | 7.6465    | 0.1965  | 0.687773 |
| Marcks1l      | chr4:129513580-129515985  | 18.2354   | 16.9306   | -0.1071 | 0.743880 |
| Prx           | chr7:27499323-27520214    | 0.3543    | 0.4766    | 0.4277  | 0.675315 |
| Plvap         | chr8:71497753-71511769    | 0.6517    | 0.4168    | -0.6448 | 0.668785 |
| Gm13771       | chr2:91641684-91641922    | 2.2771    | 3.4510    | 0.5998  | 0.407433 |
| Rras2         | chr7:114046784-114117781  | 27.8211   | 29.8711   | 0.1026  | 0.664113 |
| Wdr11         | chr7:129591862-129635738  | 7.1752    | 7.6662    | 0.0955  | 0.644397 |
| NA            | chr15:73095843-73096684   | 4.9917    | 4.3168    | -0.2096 | 0.523843 |
| Ggt7          | chr2:155490378-155518237  | 4.5474    | 4.0179    | -0.1786 | 0.754826 |
| Phactr2       | chr10:13207716-13474396   | 5.8310    | 6.2575    | 0.1019  | 0.663557 |
| Nifk          | chr1:118321838-118333822  | 45.0805   | 42.6819   | -0.0789 | 0.799736 |
| Gm20538       | chr19:44543721-44552831   | 54.6131   | 61.7970   | 0.1783  | 0.656758 |
| Gm11632       | chr11:98084456-98085424   | 14.5731   | 12.9030   | -0.1756 | 0.724080 |
| Tmem104       | chr11:115187486-115247023 | 2.2928    | 2.0020    | -0.1957 | 0.741332 |
| Far1          | chr7:113513833-113571511  | 21.3786   | 22.5289   | 0.0756  | 0.582871 |
| Pcbp3         | chr10:76761856-76961887   | 0.6605    | 0.9013    | 0.4485  | 0.678290 |
| E2f7          | chr10:110745438-110787384 | 0.9125    | 0.8120    | -0.1683 | 0.646542 |
| Sae1          | chr7:16327052-16387797    | 38.7240   | 41.6018   | 0.1034  | 0.667530 |
| NA            | chr9:73008480-73015657    | 8.1802    | 8.8396    | 0.1118  | 0.373741 |
| Gm15336       | chr18:39246246-39302690   | 1.2175    | 1.5047    | 0.3056  | 0.439327 |
| Slc14a1       | chr18:78100090-78142119   | 14.8606   | 14.1406   | -0.0716 | 0.764660 |
| Rhd           | chr4:134864535-134896172  | 0.7660    | 0.5706    | -0.4250 | 0.564050 |
| Cdk3-ps       | chr11:116216002-116220287 | 0.3730    | 0.5542    | 0.5713  | 0.403790 |

|               |                           |          |          |         |          |
|---------------|---------------------------|----------|----------|---------|----------|
| Armcx6        | chrX:134748460-134751417  | 0.5670   | 1.1273   | 0.9914  | 0.464125 |
| Psm2          | chr13:14613241-14625671   | 151.6670 | 161.2916 | 0.0888  | 0.675887 |
| Dvl3          | chr16:20516981-20532520   | 2.9243   | 2.6574   | -0.1381 | 0.736862 |
| Lrp11         | chr10:7589799-7625483     | 0.7925   | 0.6578   | -0.2689 | 0.549917 |
| Bsg           | chr10:79704490-79711969   | 49.3725  | 52.7383  | 0.0951  | 0.661814 |
| Mterf2        | chr10:85119434-85128027   | 11.1035  | 12.3554  | 0.1541  | 0.614483 |
| Rnf41         | chr10:128411615-128441438 | 14.3161  | 13.8019  | -0.0528 | 0.624060 |
| Gm12176       | chr11:47541431-47542306   | 2.0645   | 1.5657   | -0.3990 | 0.627659 |
| Fam114a2      | chr11:57482992-57518617   | 26.7561  | 28.7402  | 0.1032  | 0.689041 |
| Gm12247       | chr11:58097103-58097773   | 1.0980   | 0.6930   | -0.6639 | 0.668024 |
| Prr11         | chr11:87089152-87108708   | 1.4849   | 1.7247   | 0.2160  | 0.628559 |
| Ppp1r9b       | chr11:94991034-95006899   | 60.9063  | 58.6883  | -0.0535 | 0.806512 |
| Atp5g1        | chr11:96068851-96075670   | 1.3003   | 1.4912   | 0.1976  | 0.538569 |
| Gm12356       | chr11:98682920-98683415   | 4.1522   | 5.4975   | 0.4049  | 0.672727 |
| Casc3         | chr11:98804904-98833814   | 15.3009  | 14.6991  | -0.0579 | 0.712068 |
| BC030867      | chr11:102248881-102265187 | 1.0157   | 1.2611   | 0.3122  | 0.604860 |
| Rps6kl1       | chr12:85135595-85151264   | 0.7230   | 0.5639   | -0.3586 | 0.558263 |
| Gpr137b-ps    | chr13:12619083-12650297   | 2.1206   | 1.9006   | -0.1580 | 0.428081 |
| AA987161      | chr13:67589442-67609707   | 15.4205  | 16.3672  | 0.0860  | 0.573814 |
| Rad17         | chr13:100617164-100651059 | 18.1788  | 19.4486  | 0.0974  | 0.592027 |
| A930041C12Rik | chr5:107630249-107633850  | 2.7922   | 2.1296   | -0.3908 | 0.561425 |
| Pcgf3         | chr5:108461231-108506976  | 5.2698   | 5.0405   | -0.0642 | 0.623131 |
| Zfp113        | chr5:138139701-138155744  | 5.9887   | 5.7073   | -0.0694 | 0.667635 |
| Bri3          | chr5:144244436-144446757  | 2.5360   | 2.1267   | -0.2539 | 0.703847 |
| Mrps33        | chr6:39801803-39810988    | 2.5995   | 3.1922   | 0.2963  | 0.601008 |
| Tax1bp1       | chr6:52713728-52766780    | 48.5842  | 50.9190  | 0.0677  | 0.534081 |
| Erc1          | chr6:119570803-119848150  | 3.0516   | 3.3311   | 0.1264  | 0.664317 |
| Tmem86b       | chr7:4628041-4630482      | 10.0807  | 9.1633   | -0.1377 | 0.658258 |
| U2af2         | chr7:5062142-5079945      | 61.9906  | 59.8880  | -0.0498 | 0.761323 |
| Psmc4         | chr7:28041706-28050101    | 61.8242  | 59.3681  | -0.0585 | 0.780829 |
| Tarsl2        | chr7:65644897-65692091    | 3.3128   | 3.7975   | 0.1970  | 0.680538 |
| Nkx6-2        | chr7:139579376-139582797  | 1.1871   | 0.8829   | -0.4272 | 0.686117 |
| Siah1a        | chr8:86723939-86746006    | 9.8396   | 10.7040  | 0.1215  | 0.554257 |
| Tmem208       | chr8:105326353-105335219  | 23.9186  | 25.7011  | 0.1037  | 0.552759 |
| Klhl36        | chr8:119862304-119876988  | 8.2948   | 7.5674   | -0.1324 | 0.765248 |
| Fanca         | chr8:123268299-123318576  | 2.4733   | 2.6720   | 0.1115  | 0.342523 |
| Egln1         | chr8:124908595-124949254  | 16.7245  | 17.7919  | 0.0893  | 0.512005 |
| Dalrd3        | chr9:108569891-108572771  | 39.4068  | 41.9168  | 0.0891  | 0.566263 |
| Ptp4a3        | chr15:73723144-73758766   | 13.3858  | 12.7637  | -0.0687 | 0.760572 |
| Sco2          | chr15:89371638-89373818   | 23.4779  | 21.4717  | -0.1289 | 0.778396 |
| Gmfb          | chr14:46808148-46822242   | 45.3453  | 47.9197  | 0.0797  | 0.645438 |
| Cdadcl1       | chr14:59560895-59597836   | 4.7852   | 4.2735   | -0.1632 | 0.698580 |
| Gm4944        | chr17:22197264-22225614   | 8.6245   | 8.1633   | -0.0793 | 0.699350 |
| Gm17382       | chr17:26860286-26886175   | 0.4777   | 0.3021   | -0.6611 | 0.647231 |
| Trip10        | chr17:57249450-57263697   | 2.3062   | 1.9314   | -0.2559 | 0.732256 |
| Zfp174        | chr16:3847267-3858880     | 1.3306   | 1.1912   | -0.1597 | 0.571011 |
| Tbccd1        | chr16:22813214-22857569   | 6.9244   | 6.4720   | -0.0975 | 0.562573 |
| Boc           | chr16:44485044-44558897   | 1.3236   | 1.0857   | -0.2858 | 0.795270 |
| Uhmk1         | chr1:170193419-170215397  | 31.2541  | 32.7971  | 0.0695  | 0.546861 |
| Mir1949       | chr18:35554491-35554632   | 17.4084  | 22.0210  | 0.3391  | 0.717700 |
| Commd10       | chr18:46958861-47087992   | 10.9494  | 9.9811   | -0.1336 | 0.727315 |
| Epc2          | chr2:49451485-49551948    | 25.1278  | 24.3323  | -0.0464 | 0.700155 |
| Tmx2          | chr2:84671315-84679140    | 8.0788   | 8.7921   | 0.1221  | 0.451687 |
| Mfap1a        | chr2:121491910-121506665  | 6.8119   | 7.3974   | 0.1190  | 0.632896 |
| Dnmt3b        | chr2:153649449-153687730  | 2.7793   | 2.5712   | -0.1123 | 0.643704 |
| Edn3          | chr2:174760618-174784042  | 0.3183   | 0.4111   | 0.3690  | 0.536910 |
| Supt20        | chr3:54692822-54728762    | 31.3296  | 30.1380  | -0.0559 | 0.705981 |
| Lrrc71        | chr3:87736922-87748625    | 2.3136   | 2.1052   | -0.1362 | 0.638234 |
| Fam102b       | chr3:108970996-109027607  | 6.6983   | 6.3401   | -0.0793 | 0.708249 |
| Slc39a8       | chr3:135825278-135888572  | 1.5233   | 1.7322   | 0.1854  | 0.653712 |
| Zbtb5         | chr4:44991241-45012412    | 6.9294   | 7.4583   | 0.1061  | 0.655332 |
| Rbbp4         | chr4:129307099-129335370  | 26.7046  | 28.0019  | 0.0684  | 0.507455 |
| Dnajc8        | chr4:132535549-132553742  | 62.3447  | 65.5890  | 0.0732  | 0.521403 |
| Pqlc2         | chr4:139294028-139310708  | 1.4926   | 1.7442   | 0.2247  | 0.615144 |
| Dnaaf3        | chr7:4522932-4532453      | 0.5378   | 0.7492   | 0.4783  | 0.541195 |
| Gm15133       | chr7:104315018-104324838  | 4.7618   | 3.6683   | -0.3764 | 0.695803 |
| Impg1         | chr9:80313329-80465438    | 0.2144   | 0.1265   | -0.7610 | 0.668457 |
| Gm26158       | chr19:60775520-60775639   | 8.6130   | 5.2692   | -0.7089 | 0.679314 |
| Gm22358       | chr13:24811446-24811568   | 7.0797   | 4.4208   | -0.6794 | 0.675430 |
| Hsf4          | chr8:105269800-105275845  | 0.4197   | 0.6498   | 0.6305  | 0.595397 |
| Sfi1          | chr11:3131849-3193463     | 24.5375  | 26.0748  | 0.0877  | 0.698447 |

|               |                           |          |          |         |          |
|---------------|---------------------------|----------|----------|---------|----------|
| Eif4enif1     | chr11:3202391-3244588     | 11.7888  | 12.5633  | 0.0918  | 0.616257 |
| Scpep1os      | chr11:88905927-88936061   | 1.3375   | 0.9327   | -0.5201 | 0.577128 |
| 2610035D17Rik | chr11:113043894-113201838 | 9.2396   | 8.6694   | -0.0919 | 0.588377 |
| Prps1l1       | chr12:34984760-34986436   | 2.1120   | 2.5451   | 0.2691  | 0.644674 |
| Ggps1         | chr13:14052448-14063401   | 34.4383  | 32.8803  | -0.0668 | 0.766015 |
| 3110070M22Rik | chr13:119487260-119488383 | 0.8829   | 0.5803   | -0.6054 | 0.583604 |
| Wfs1          | chr5:36966103-36988982    | 1.1778   | 1.0153   | -0.2143 | 0.582506 |
| Pebp1         | chr5:117282650-117287625  | 12.9182  | 14.3400  | 0.1506  | 0.700750 |
| Mrpl19        | chr6:81957850-81965958    | 8.5633   | 9.2122   | 0.1054  | 0.652674 |
| Ppp1r12c      | chr7:4481519-4501680      | 30.1686  | 29.2387  | -0.0452 | 0.749871 |
| Ercc1         | chr7:19344777-19356524    | 9.9485   | 10.7045  | 0.1057  | 0.494241 |
| Clec11a       | chr7:44303769-44306959    | 1.6398   | 1.3300   | -0.3020 | 0.670356 |
| Mki67         | chr7:135689787-135716379  | 56.6173  | 59.6399  | 0.0750  | 0.676699 |
| Snacp2        | chr8:4253101-4256219      | 8.6154   | 9.6176   | 0.1588  | 0.614980 |
| Letm2         | chr8:25578491-25597487    | 5.8971   | 5.3768   | -0.1333 | 0.716825 |
| Gm6180        | chr8:42246910-42247411    | 19.8139  | 18.0668  | -0.1332 | 0.572911 |
| NA            | chr8:95323013-95325263    | 3.6186   | 4.1708   | 0.2049  | 0.688007 |
| Smco4         | chr9:15505486-15545260    | 16.5859  | 18.4859  | 0.1565  | 0.688722 |
| Snord16a      | chr9:64175422-64175521    | 10.8215  | 15.7101  | 0.5378  | 0.678115 |
| Usp3          | chr9:66514636-66593142    | 29.8373  | 29.0169  | -0.4002 | 0.744702 |
| Timm17b       | chrX:7899356-7908351      | 11.9554  | 13.0605  | 0.1275  | 0.678678 |
| Spin4         | chrX:95022506-95026682    | 0.7284   | 0.5979   | -0.2848 | 0.650910 |
| Taf9b         | chrX:106206882-106221158  | 11.4814  | 10.9417  | -0.0695 | 0.556925 |
| Zfp623        | chr15:75940951-75949377   | 8.9827   | 8.4572   | -0.0870 | 0.636680 |
| Ggnbp1        | chr17:26973216-27036378   | 13.4963  | 13.1087  | -0.0420 | 0.549029 |
| Nfkbil1       | chr17:35220174-35235792   | 11.5176  | 10.6165  | -0.1175 | 0.748100 |
| Snord53       | chr17:71640878-71640956   | 23.0600  | 18.6761  | -0.3042 | 0.485058 |
| Socs1         | chr16:10783807-10785536   | 43.6586  | 46.8699  | 0.1024  | 0.661822 |
| Dgcr14        | chr16:17900710-17911348   | 15.8210  | 15.0983  | -0.0675 | 0.698746 |
| Sec22a        | chr16:35311130-35363918   | 6.1064   | 5.7513   | -0.0864 | 0.692621 |
| Parp14        | chr16:35832873-35871544   | 52.8497  | 55.6394  | 0.0742  | 0.660762 |
| Btg3          | chr16:78359859-78377192   | 1.2012   | 0.9434   | -0.3485 | 0.563960 |
| Ppp6r3        | chr19:3454932-3575749     | 65.4245  | 64.0026  | -0.0317 | 0.650655 |
| Sipa1         | chr19:5651184-5663707     | 58.4367  | 61.7961  | 0.0806  | 0.665832 |
| Frat1         | chr19:41830167-41830809   | 4.7636   | 5.9367   | 0.3176  | 0.681309 |
| Sfxn3         | chr19:45047575-45056383   | 10.9332  | 10.4096  | -0.0708 | 0.547355 |
| Phf3          | chr1:30802341-30863256    | 33.9478  | 35.8230  | 0.0776  | 0.656500 |
| Nabp1         | chr1:51469497-51478399    | 57.3580  | 55.1014  | -0.0579 | 0.797924 |
| Cul3          | chr1:80264922-80340480    | 58.6484  | 61.7157  | 0.0735  | 0.617409 |
| Pcdhgc4       | chr18:37674334-37841873   | 1.0440   | 0.9686   | -0.1081 | 0.766597 |
| Fam210a       | chr18:68260186-68300333   | 8.6717   | 8.3781   | -0.0497 | 0.684864 |
| Snap23        | chr2:120567670-120601255  | 9.5680   | 10.3837  | 0.1180  | 0.684527 |
| Gm14253       | chr2:156346803-156347997  | 1.1779   | 1.6035   | 0.4450  | 0.549872 |
| Fam63a        | chr3:95281344-95296166    | 3.9913   | 3.7673   | -0.0833 | 0.616878 |
| Tlr4          | chr4:66827583-66930284    | 0.5512   | 0.7116   | 0.3686  | 0.596721 |
| 4921514A10Rik | chr4:141115659-141118087  | 9.3092   | 8.6206   | -0.1109 | 0.727588 |
| Tnfrsf9       | chr4:150914561-150946102  | 105.8715 | 111.4640 | 0.0743  | 0.654599 |
| Zcchc14       | chr8:121598702-121652901  | 0.1352   | 0.1871   | 0.4682  | 0.421511 |
| Gm2237        | chr14:19563800-19585135   | 0.8591   | 1.1571   | 0.4296  | 0.543061 |
| Snord69       | chr14:31014286-31014366   | 8.6885   | 13.0595  | 0.5879  | 0.614040 |
| BC034090      | chr1:155212473-155232724  | 0.5857   | 0.4312   | -0.4415 | 0.713551 |
| Gm13572       | chr2:60037140-60038837    | 0.7641   | 1.3301   | 0.7997  | 0.542449 |
| Tbkbp1        | chr11:97136170-97151495   | 0.1816   | 0.2726   | 0.5856  | 0.619167 |
| 2610206C17Rik | chr7:84689639-84776549    | 0.4125   | 0.5977   | 0.5349  | 0.453240 |
| Rsph9         | chr17:46122034-46144216   | 0.3411   | 0.5462   | 0.6790  | 0.606809 |
| A530032D15Rik | chr1:85083068-85109853    | 0.5182   | 0.3492   | -0.5695 | 0.638659 |
| Tead3         | chr17:28331670-28350805   | 0.0999   | 0.1560   | 0.6432  | 0.500303 |
| Gm4262        | chr16:11008897-11015186   | 0.5025   | 0.3531   | -0.5091 | 0.633039 |
| Vopp1         | chr6:57727806-57825154    | 5.3263   | 5.1157   | -0.0582 | 0.616365 |
| Zgpat         | chr2:181364927-181383628  | 57.2303  | 55.7292  | -0.0383 | 0.780669 |
| Zfp207        | chr11:80383278-80405733   | 80.5975  | 78.8645  | -0.0314 | 0.709025 |
| Trmt5         | chr12:73280409-73286711   | 12.8256  | 14.3514  | 0.1622  | 0.696360 |
| Gm20900       | chr13:120304193-120304655 | 4.0706   | 3.0834   | -0.4007 | 0.648969 |
| lqce          | chr5:140661826-140702378  | 3.5277   | 3.3063   | -0.0935 | 0.795365 |
| Tspan4        | chr7:141475239-141493427  | 1.7104   | 2.0203   | 0.2403  | 0.533911 |
| Oraov1        | chr7:144915099-144930748  | 6.0987   | 5.7748   | -0.0787 | 0.664502 |
| lds           | chrX:70343068-70365084    | 4.0433   | 3.7758   | -0.0988 | 0.665918 |
| Dntt          | chr19:41029274-41059523   | 1.4860   | 1.2638   | -0.2337 | 0.550230 |
| Rps6ka4       | chr19:6829084-6840601     | 14.7723  | 14.0581  | -0.0715 | 0.744604 |
| Nkd2          | chr13:73818533-73847631   | 0.3402   | 0.4648   | 0.4501  | 0.616699 |
| Snora33       | chr10:23785346-23785475   | 32.0445  | 25.0433  | -0.3557 | 0.688542 |

|               |                           |          |          |         |          |
|---------------|---------------------------|----------|----------|---------|----------|
| Susd2         | chr10:75636618-75644008   | 3.4964   | 3.1626   | -0.1447 | 0.721001 |
| Mir3057       | chr10:81271596-81271687   | 43.5948  | 37.1913  | -0.2292 | 0.632721 |
| Galnt4        | chr10:99108134-99113245   | 7.3523   | 7.9863   | 0.1193  | 0.698031 |
| Zkscan17      | chr11:59485519-59526751   | 9.8397   | 10.6052  | 0.1081  | 0.662770 |
| Snord42b      | chr11:78183055-78183124   | 16.7084  | 12.7896  | -0.3856 | 0.488680 |
| Poldip2       | chr11:78512192-78522736   | 9.0601   | 9.7972   | 0.1128  | 0.648955 |
| Heatr6        | chr11:83753695-83783754   | 7.9985   | 8.4959   | 0.0870  | 0.500521 |
| Caskin2       | chr11:115799182-115813639 | 1.0526   | 1.2212   | 0.2144  | 0.635733 |
| NA            | chr12:34984772-34986390   | 2.1904   | 2.6311   | 0.2645  | 0.652813 |
| E330009J07Rik | chr6:40401374-40436135    | 10.5910  | 10.1202  | -0.0656 | 0.766607 |
| Trnt1         | chr6:106769119-106782474  | 34.9279  | 33.9315  | -0.0418 | 0.706847 |
| Dera          | chr6:137754541-137837891  | 22.7751  | 24.3872  | 0.0987  | 0.550402 |
| Megf8         | chr7:25317163-25365917    | 0.2080   | 0.1636   | -0.3458 | 0.617198 |
| Capn5         | chr7:98121558-98178274    | 1.1625   | 1.3657   | 0.2324  | 0.681951 |
| B130055M24Rik | chr7:127448635-127460360  | 13.4501  | 14.4610  | 0.1046  | 0.400106 |
| 5830432E09Rik | chr7:135635930-135652314  | 2.8487   | 2.5762   | -0.1451 | 0.718621 |
| Ifitm2        | chr7:140954838-140955961  | 6.2311   | 7.5560   | 0.2781  | 0.726288 |
| Shcbp1        | chr8:4735979-4779534      | 10.2703  | 9.4838   | -0.1149 | 0.749416 |
| Gm23455       | chr9:15316488-15316588    | 486.2197 | 462.6530 | -0.0717 | 0.748880 |
| Dock3         | chr9:106892833-107231909  | 0.1155   | 0.1447   | 0.3250  | 0.562621 |
| Mid1ip1       | chrX:10715012-10719690    | 9.9765   | 10.8443  | 0.1203  | 0.585927 |
| Xlr4e-ps      | chrX:74944962-74952044    | 3.8453   | 3.2045   | -0.2630 | 0.476053 |
| 2810403D21Rik | chrX:108834477-108974906  | 1.0465   | 1.0465   | 0.1911  | 0.668787 |
| Acsl4         | chrX:142317992-142390535  | 17.5083  | 16.9406  | -0.0476 | 0.687726 |
| Tom22         | chr15:79670860-79672862   | 78.8449  | 83.9903  | 0.0912  | 0.668779 |
| Prpf40b       | chr15:99259086-99317018   | 2.6717   | 2.4535   | -0.1229 | 0.710595 |
| March2        | chr17:33685691-33718670   | 12.2498  | 13.0304  | 0.0891  | 0.617269 |
| Kank3         | chr17:33810519-33822918   | 2.6868   | 2.4511   | -0.1324 | 0.300004 |
| Sf3b2         | chr19:5273922-5295455     | 131.6309 | 129.1437 | -0.0275 | 0.691323 |
| Rfk           | chr19:17394042-17401349   | 24.4323  | 26.0264  | 0.0912  | 0.619405 |
| Smarca2       | chr19:26605114-26778321   | 14.1955  | 13.6944  | -0.0518 | 0.780988 |
| Ndufb8        | chr19:44548571-44555440   | 20.1874  | 21.6381  | 0.1001  | 0.678195 |
| Gm10197       | chr19:53371565-53371766   | 12.7593  | 15.3090  | 0.2628  | 0.514011 |
| Chpf          | chr1:75474568-75479471    | 9.8918   | 10.6617  | 0.1081  | 0.617772 |
| Sh3bp4        | chr1:89070414-89155068    | 0.2214   | 0.3044   | 0.4593  | 0.544611 |
| NA            | chr1:91928784-91931176    | 5.7492   | 5.1826   | -0.1497 | 0.753553 |
| Dsel          | chr1:111858701-111864909  | 3.5116   | 3.2708   | -0.1025 | 0.712673 |
| Arhgap12      | chr18:6024426-6136098     | 7.5171   | 7.9909   | 0.0882  | 0.528464 |
| Gm8731        | chr18:60778982-60779394   | 5.0645   | 3.7894   | -0.4185 | 0.725635 |
| Gm13991       | chr2:116527842-116528490  | 1.1313   | 0.7513   | -0.5906 | 0.501552 |
| Kiz           | chr2:146855863-146970097  | 11.4137  | 12.3238  | 0.1107  | 0.582653 |
| Gm11463       | chr2:165976756-165985924  | 0.7539   | 1.1052   | 0.5518  | 0.601100 |
| Dcst1         | chr3:89350218-89365253    | 1.4111   | 1.1950   | -0.2398 | 0.755835 |
| Rhoc          | chr3:104789010-104794459  | 5.9074   | 6.6653   | 0.1742  | 0.588038 |
| Sass6         | chr3:116595007-116630984  | 3.2367   | 3.6498   | 0.1733  | 0.669706 |
| Akirin2       | chr4:34550936-34566908    | 26.4947  | 28.2261  | 0.0913  | 0.435329 |
| Test2         | chr4:116720947-116805956  | 9.0862   | 8.6125   | -0.0772 | 0.732421 |
| Paqr7         | chr4:134496696-134510235  | 7.8330   | 8.4206   | 0.1044  | 0.610119 |
| Cyp2t4        | chr7:27153713-27158668    | 1.0951   | 1.4059   | 0.3604  | 0.555985 |
| 4933417D19Rik | chr8:123235090-123242359  | 1.7723   | 2.3608   | 0.4136  | 0.645980 |
| Gm15518       | chr16:49758575-49798870   | 0.9806   | 0.7449   | -0.3966 | 0.645021 |
| Pld3          | chr7:27531999-27553218    | 29.1298  | 27.7435  | -0.0703 | 0.805317 |
| 4931406C07Rik | chr9:15283336-15306448    | 1.3359   | 1.6129   | 0.2718  | 0.709380 |
| 4933412A08Rik | chr19:60226333-60227678   | 1.6294   | 1.3302   | -0.2927 | 0.607826 |
| 2310035C23Rik | chr1:105663860-105755131  | 25.5370  | 24.6955  | -0.0483 | 0.764340 |
| Sec16b        | chr1:157506727-157568425  | 0.5514   | 0.4604   | -0.2600 | 0.613578 |
| Chchd7        | chr4:3938887-3951046      | 3.8751   | 3.6093   | -0.1025 | 0.641429 |
| Stox1         | chr10:62659042-62726128   | 0.6994   | 0.9150   | 0.3876  | 0.693930 |
| Gm10499       | chr17:36141757-36145923   | 0.6155   | 0.8143   | 0.4037  | 0.555622 |
| Rsp10b        | chr5:143933034-143985719  | 1.2388   | 1.0495   | -0.2393 | 0.671820 |
| Ska1          | chr18:74195298-74207818   | 2.4332   | 2.7374   | 0.1699  | 0.251695 |
| 4933427D14Rik | chr11:72153928-72207459   | 8.8606   | 8.4628   | -0.0663 | 0.742367 |
| Cfdp1         | chr8:111768472-111854310  | 70.4380  | 75.7562  | 0.1050  | 0.732246 |
| Tmem26        | chr10:68723745-68782654   | 0.1165   | 0.1912   | 0.7141  | 0.647802 |
| Nabp2         | chr10:128401394-128411492 | 10.6998  | 11.6565  | 0.1236  | 0.655038 |
| 4930403D09Rik | chr11:34299706-34308113   | 13.4976  | 12.1171  | -0.1557 | 0.721815 |
| Gm12289       | chr11:64012614-64015224   | 0.6826   | 0.5010   | -0.4461 | 0.619541 |
| Cdc6          | chr11:98907800-98923940   | 6.3898   | 6.0853   | -0.0704 | 0.607520 |
| Hexim2        | chr11:103132428-103139876 | 2.2173   | 2.5836   | 0.2206  | 0.645450 |
| Churc1        | chr12:76765537-76783180   | 6.3847   | 6.8926   | 0.1104  | 0.665004 |
| Akt1          | chr12:112653820-112674884 | 40.6904  | 39.5868  | -0.0397 | 0.734990 |

|               |                           |          |          |         |          |
|---------------|---------------------------|----------|----------|---------|----------|
| Mast4         | chr13:102732485-103334497 | 0.9332   | 0.8457   | -0.1420 | 0.801192 |
| Acad12        | chr5:121598283-121618938  | 0.2815   | 0.2069   | -0.4444 | 0.652425 |
| Cdk8          | chr5:146231229-146302874  | 8.6865   | 9.3994   | 0.1138  | 0.674943 |
| Gm16039       | chr6:8259287-8597480      | 10.8982  | 11.5753  | 0.0870  | 0.678283 |
| Trbv2         | chr6:41047555-41047995    | 87.3677  | 82.2201  | -0.0876 | 0.715546 |
| Zfp398        | chr6:47835660-47868257    | 4.9957   | 5.3301   | 0.0935  | 0.294297 |
| Bloc1s3       | chr7:19505813-19508331    | 7.9296   | 7.3382   | -0.1118 | 0.679628 |
| C230062116Rik | chr7:29953620-29955992    | 1.0903   | 0.8967   | -0.2820 | 0.618019 |
| Gm22133       | chr7:45458088-45458197    | 468.6328 | 507.6361 | 0.1153  | 0.734483 |
| Hddc3         | chr7:80343136-80346097    | 4.1009   | 3.5501   | -0.2081 | 0.537059 |
| Neu3          | chr7:99811438-99828417    | 16.8814  | 16.1531  | -0.0636 | 0.737193 |
| Tbc1d10b      | chr7:127197464-127208468  | 18.8399  | 19.9986  | 0.0861  | 0.664828 |
| Zfp747        | chr7:127372563-127376050  | 5.9849   | 5.5862   | -0.0995 | 0.635710 |
| Nap114        | chr7:143513578-143549090  | 91.9542  | 96.1335  | 0.0641  | 0.391999 |
| Msmo1         | chr8:64718138-64733792    | 7.7642   | 8.3306   | 0.1016  | 0.656759 |
| Tma16         | chr8:66474329-66486530    | 2.8421   | 3.2992   | 0.2151  | 0.736734 |
| Gmip          | chr8:69808678-69821870    | 26.1676  | 25.4184  | -0.0419 | 0.750229 |
| Gm26532       | chr8:84208919-84209609    | 12.5914  | 11.3585  | -0.1487 | 0.638101 |
| Icam5         | chr9:21032037-21039036    | 2.0023   | 2.2609   | 0.1752  | 0.320245 |
| Sdhd          | chr9:50596337-50603849    | 58.6418  | 61.8017  | 0.0757  | 0.459218 |
| Gk5           | chr9:96119361-96184627    | 0.9138   | 0.8185   | -0.1589 | 0.492573 |
| Mrpl3         | chr9:105053238-105077466  | 15.0509  | 16.2462  | 0.1103  | 0.712069 |
| Zkscan7       | chr9:122888470-122896124  | 6.7758   | 7.4904   | 0.1447  | 0.630458 |
| Mid2          | chrX:140664598-140767715  | 0.1694   | 0.2265   | 0.4193  | 0.667975 |
| Chadl         | chr15:81678295-81697287   | 2.6911   | 2.4625   | -0.1281 | 0.730415 |
| Fmn13         | chr15:99317224-99370482   | 14.6096  | 14.0980  | -0.0514 | 0.701895 |
| Cbx5          | chr15:103191543-103239816 | 27.5637  | 28.9149  | 0.0690  | 0.600151 |
| Dleu2         | chr14:61602838-61682373   | 10.0982  | 10.7558  | 0.0910  | 0.703704 |
| Dok2          | chr14:70766035-70778495   | 46.3073  | 48.7944  | 0.0755  | 0.609095 |
| Csnk2b        | chr17:35116195-35122053   | 45.0772  | 47.8494  | 0.0861  | 0.654156 |
| Slc25a1       | chr16:17925210-17928219   | 14.4200  | 15.5555  | 0.1094  | 0.625826 |
| Dgkg          | chr16:22468460-22657221   | 0.4867   | 0.3738   | -0.3808 | 0.654214 |
| Gm15953       | chr16:38512564-38514296   | 1.2314   | 1.5230   | 0.3067  | 0.643178 |
| Filip1l       | chr16:57353092-57573126   | 6.9614   | 6.6133   | -0.0740 | 0.734393 |
| Fosl1         | chr19:5447702-5455945     | 1.4075   | 1.1602   | -0.2788 | 0.650952 |
| Uap1          | chr1:170141937-170174957  | 9.2723   | 9.8897   | 0.0930  | 0.454463 |
| Adrb2         | chr18:62177816-62179959   | 8.8186   | 8.1669   | -0.1108 | 0.717543 |
| Txn1          | chr18:63662800-63692359   | 26.6457  | 28.4382  | 0.0939  | 0.658445 |
| Vps39         | chr2:120316460-120353137  | 12.6003  | 13.4892  | 0.0983  | 0.696040 |
| Atp5f1        | chr3:105942697-105960099  | 37.1834  | 39.2956  | 0.0797  | 0.666025 |
| Sh3glb1       | chr3:144688843-144720323  | 32.1324  | 33.8191  | 0.0738  | 0.561053 |
| Arhgef39      | chr4:43496141-43499695    | 2.5940   | 2.3256   | -0.1576 | 0.647652 |
| Lrrc41        | chr4:116075268-116097043  | 11.7320  | 12.4625  | 0.0871  | 0.441287 |
| Zbtb8a        | chr4:129353627-129378116  | 2.7274   | 2.4337   | -0.1644 | 0.586904 |
| Z610002J02Rik | chr4:155249801-155256687  | 20.0541  | 18.9313  | -0.0831 | 0.750752 |
| B3galt6       | chr4:155989465-155992678  | 5.1880   | 5.6884   | 0.1328  | 0.560764 |
| Myo1a         | chr10:127705169-127720887 | 0.2208   | 0.1300   | -0.7648 | 0.676580 |
| 1810019N24Rik | chr7:12948591-12961768    | 0.5116   | 0.7723   | 0.5940  | 0.536874 |
| Traj44        | chr14:54173689-54173750   | 20.8102  | 15.2544  | -0.4481 | 0.591626 |
| Fam221b       | chr4:43659621-43669145    | 0.7913   | 0.6115   | -0.3720 | 0.752899 |
| Gm12481       | chr4:43663948-43664408    | 7.5905   | 5.8651   | -0.3720 | 0.752899 |
| Ptpn12        | chr5:20986644-21055911    | 6.9801   | 7.5038   | 0.1044  | 0.433732 |
| NA            | chr5:114812792-114813945  | 2.9142   | 3.8116   | 0.3873  | 0.734139 |
| Mcm7          | chr5:138164582-138172422  | 30.0071  | 29.2402  | -0.0374 | 0.677805 |
| Mllt4         | chr17:13760538-13906150   | 0.8442   | 0.7484   | -0.1736 | 0.769521 |
| Kifc2         | chr15:76660640-76668196   | 3.4893   | 3.9181   | 0.1672  | 0.640718 |
| Npat          | chr9:53537046-53574342    | 15.7708  | 15.2265  | -0.0507 | 0.731305 |
| Ogfod3        | chr11:121177590-121204711 | 2.0933   | 1.7277   | -0.2770 | 0.616056 |
| Denr          | chr5:123907174-123928832  | 16.4065  | 17.7301  | 0.1119  | 0.711506 |
| Ints4         | chr7:97480955-97541397    | 23.5946  | 24.9285  | 0.0793  | 0.517159 |
| Moap1         | chr12:102742229-102743661 | 7.4371   | 6.8047   | -0.1282 | 0.605156 |
| Gnb5          | chr9:75311394-75344964    | 1.2507   | 1.6125   | 0.3665  | 0.610731 |
| Ankrd46       | chr15:36477667-36496791   | 22.0141  | 21.1630  | -0.0569 | 0.714661 |
| Gm16796       | chr2:170499356-170511927  | 0.1460   | 0.2190   | 0.5844  | 0.541572 |
| Serinc1       | chr10:57515773-57532530   | 33.8505  | 35.5380  | 0.0702  | 0.607341 |
| Tmem88        | chr11:69396518-69398234   | 7.6339   | 8.5604   | 0.1653  | 0.660940 |
| Sap30bpos     | chr11:115946449-115952105 | 0.7979   | 0.9981   | 0.3229  | 0.686144 |
| Baz1a         | chr12:54892988-55014348   | 38.5290  | 40.5783  | 0.0748  | 0.676067 |
| Cast          | chr13:74694285-74807921   | 97.2062  | 101.5101 | 0.0625  | 0.484798 |
| Brdt          | chr5:107331158-107387058  | 0.4452   | 0.3750   | -0.2477 | 0.378084 |
| Trpv6         | chr6:41620620-41636405    | 1.9110   | 1.6460   | -0.2153 | 0.713352 |

|               |                           |          |          |         |          |
|---------------|---------------------------|----------|----------|---------|----------|
| Gm26656       | chr6:128843785-128846959  | 0.7574   | 0.6144   | -0.3019 | 0.631606 |
| Tgfb1         | chr7:25687001-25705077    | 19.9539  | 18.7496  | -0.0898 | 0.816832 |
| Tube5         | chr7:55794147-55831447    | 15.9979  | 15.2891  | -0.0654 | 0.773745 |
| Ubf1          | chr7:122067174-122082194  | 8.1234   | 7.8414   | -0.0510 | 0.713177 |
| Mri1          | chr8:84249905-84257326    | 15.1623  | 14.4033  | -0.0741 | 0.773238 |
| A230103J11Rik | chr8:85053159-85060460    | 8.2494   | 9.0069   | 0.1267  | 0.607951 |
| Zhx2          | chr15:57694664-57839833   | 12.3742  | 11.7490  | -0.0748 | 0.798413 |
| Rab11fp2      | chr19:59902883-59943654   | 8.2076   | 8.7102   | 0.0857  | 0.415158 |
| Inpp5d        | chr1:87620311-87720507    | 35.5151  | 37.2765  | 0.0698  | 0.620009 |
| Ttf1          | chr2:29060261-29087656    | 13.7566  | 13.3429  | -0.0441 | 0.649869 |
| Gm26079       | chr5:110692048-110692181  | 7.1031   | 10.0915  | 0.5066  | 0.672536 |
| Gm6104        | chr1:4879201-4880669      | 0.5383   | 0.3082   | -0.8046 | 0.662841 |
| Ybey          | chr10:76459568-76469114   | 1.9900   | 2.3095   | 0.2148  | 0.689470 |
| Uhrf1bp1l     | chr10:89744990-89819869   | 15.1766  | 15.9370  | 0.0705  | 0.415352 |
| 4933426K07Rik | chr11:57655414-57657826   | 1.1943   | 0.9668   | -0.3049 | 0.544100 |
| Gm22068       | chr11:87426715-87426879   | 13.8697  | 10.7664  | -0.3654 | 0.702343 |
| Gpbp1         | chr13:111425679-111490111 | 61.3762  | 64.9048  | 0.0806  | 0.706693 |
| Dcun1d4       | chr5:73481001-73560794    | 4.4878   | 4.1660   | -0.1073 | 0.801236 |
| Ric8          | chr7:140856956-140863730  | 24.3035  | 23.6237  | -0.0409 | 0.727536 |
| Fam120b       | chr17:15396245-15433580   | 20.7505  | 21.8627  | 0.0753  | 0.535664 |
| Gm24814       | chr16:8738320-8738390     | 22.7008  | 28.5219  | 0.3293  | 0.542329 |
| Tbc1d12       | chr19:38836578-38919923   | 2.1446   | 2.3872   | 0.1546  | 0.501394 |
| A430110L20Rik | chr1:181225985-181228498  | 1.9293   | 1.6636   | -0.2138 | 0.711170 |
| Astl          | chr2:127338638-127357651  | 1.0255   | 0.8728   | -0.2325 | 0.391806 |
| Pars2         | chr4:106651068-106655282  | 6.3973   | 5.9839   | -0.0964 | 0.679279 |
| Htr2b         | chr1:86099025-86111970    | 2.0560   | 1.6076   | -0.3549 | 0.773835 |
| Gm12165       | chr11:46036439-46036781   | 2.3103   | 1.4664   | -0.6558 | 0.700998 |
| Gm26020       | chrX:105819882-105820065  | 5.7942   | 4.0361   | -0.5216 | 0.709323 |
| Sar1a         | chr10:61680309-61693295   | 60.9454  | 59.4507  | -0.0358 | 0.723566 |
| 1810043G02Rik | chr10:77978523-77986905   | 2.0821   | 1.9278   | -0.1111 | 0.641541 |
| E130317F20Rik | chr10:79851380-79854956   | 2.4665   | 2.2453   | -0.1356 | 0.627716 |
| Csnk1g2       | chr10:80622779-80640771   | 71.1113  | 75.1508  | 0.0797  | 0.704796 |
| Mdm1          | chr10:118141786-118168997 | 4.8176   | 5.2805   | 0.1324  | 0.619614 |
| Bloc1s1       | chr10:128917881-128924035 | 21.1796  | 19.8906  | -0.0906 | 0.767124 |
| Myo1g         | chr11:6506547-6520965     | 53.1072  | 55.5249  | 0.0642  | 0.613033 |
| Rps27a        | chr11:29545845-29548109   | 9.9717   | 9.3636   | -0.0908 | 0.672024 |
| Cpeb4         | chr11:31872210-31935634   | 9.9385   | 9.5171   | -0.0625 | 0.750708 |
| Rars          | chr11:35808380-35834506   | 32.0119  | 33.8339  | 0.0799  | 0.634688 |
| Snord49a      | chr11:62603449-62603521   | 36.6995  | 44.4592  | 0.2767  | 0.604626 |
| Ormdl3        | chr11:98581255-98587368   | 18.1293  | 19.4489  | 0.1014  | 0.673843 |
| Nt5c3b        | chr11:100422320-100441808 | 22.2345  | 21.5533  | -0.0449 | 0.691781 |
| Dcaf7         | chr11:106036871-106059324 | 36.7237  | 38.2750  | 0.0597  | 0.356322 |
| Sptb          | chr12:76580487-76710547   | 0.8586   | 0.7403   | -0.2139 | 0.782931 |
| Prox2os       | chr12:85086373-85088228   | 1.9655   | 1.6122   | -0.2859 | 0.669012 |
| Gpr65         | chr12:98268634-98276624   | 20.5775  | 21.9802  | 0.0951  | 0.610881 |
| Rian          | chr12:109603939-109661716 | 0.3244   | 0.2691   | -0.2698 | 0.774089 |
| Gm15440       | chr13:51685528-51701041   | 7.2888   | 6.3660   | -0.1953 | 0.804559 |
| F2rl2         | chr13:95696852-95702739   | 1.8985   | 2.2748   | 0.2609  | 0.720695 |
| Ak6           | chr13:100651342-100666413 | 18.0543  | 19.9161  | 0.1416  | 0.668507 |
| Gm22887       | chr5:22534736-22534843    | 11.5655  | 8.3658   | -0.4673 | 0.643095 |
| Ugdh          | chr5:65413201-65435946    | 7.0391   | 6.7228   | -0.0663 | 0.741977 |
| Ccdc18        | chr5:108132913-108232947  | 0.9545   | 1.1991   | 0.3291  | 0.589831 |
| Hps4          | chr5:112343082-112378414  | 6.3488   | 6.8019   | 0.0995  | 0.345761 |
| Eif4h         | chr5:134619879-134639348  | 142.4639 | 139.0912 | -0.0346 | 0.789840 |
| Fry           | chr5:150259929-150497752  | 4.3466   | 4.1388   | -0.0707 | 0.770173 |
| Wasl          | chr6:24613804-24665009    | 5.7900   | 6.3388   | 0.1307  | 0.721876 |
| Trbv17        | chr6:41163091-41163551    | 31.3351  | 28.5564  | -0.1340 | 0.705992 |
| Nod1          | chr6:54923941-54972612    | 13.5404  | 12.9478  | -0.0646 | 0.768802 |
| Sec61a1       | chr6:88503600-88518905    | 40.7315  | 42.6094  | 0.0650  | 0.579369 |
| Creld1        | chr6:113483296-113493338  | 2.2220   | 2.0003   | -0.1516 | 0.730550 |
| Ddx47         | chr6:135011611-135023776  | 18.1590  | 17.5384  | -0.0502 | 0.767472 |
| Gm15706       | chr6:145250528-145251849  | 4.8615   | 4.2918   | -0.1798 | 0.396601 |
| Trappc6a      | chr7:19508669-19516145    | 14.6103  | 16.1590  | 0.1454  | 0.717219 |
| Gm26890       | chr7:19597292-19602294    | 1.8913   | 1.6499   | -0.1970 | 0.750355 |
| 1600014C10Rik | chr7:38183216-38197568    | 25.5510  | 26.7777  | 0.0677  | 0.287251 |
| Rpl14-ps1     | chr7:45324940-45325651    | 118.9593 | 103.5649 | -0.1999 | 0.769197 |
| Ruvbl2        | chr7:45421851-45438096    | 25.7130  | 24.8226  | -0.0508 | 0.760933 |
| E030018B13Rik | chr7:63916856-63920539    | 3.8794   | 3.2347   | -0.2622 | 0.758372 |
| Gm21974       | chr7:127886226-127895454  | 3.0190   | 2.6254   | -0.2016 | 0.699195 |
| Ap2a2         | chr7:141562179-141633011  | 23.0698  | 24.1994  | 0.0690  | 0.471409 |
| Xab2          | chr8:3608420-3621316      | 29.5238  | 28.7290  | -0.0394 | 0.759847 |



|               |                           |          |          |         |          |
|---------------|---------------------------|----------|----------|---------|----------|
| Scoc          | chr8:83434492-83458391    | 1.5932   | 1.3752   | -0.2123 | 0.577163 |
| Tppp3         | chr8:105467492-105471526  | 1.4561   | 1.1228   | -0.3751 | 0.735335 |
| Sntb2         | chr8:106935749-107014192  | 7.1695   | 7.7386   | 0.1102  | 0.686579 |
| Wwp2          | chr8:107436397-107558594  | 34.3637  | 33.4328  | -0.0396 | 0.764529 |
| Zfp612        | chr8:110079763-110090181  | 0.7730   | 0.5963   | -0.3743 | 0.693813 |
| Gm26397       | chr8:126944846-126944980  | 51.4008  | 58.8635  | 0.1956  | 0.703432 |
| Zfp317        | chr9:19641223-19648048    | 32.6051  | 34.5387  | 0.0831  | 0.571171 |
| Ppp2r1b       | chr9:50845300-50894229    | 15.3973  | 14.9689  | -0.0407 | 0.631326 |
| Nrg4          | chr9:55220221-55326844    | 3.6585   | 3.4296   | -0.0932 | 0.714138 |
| Sema7a        | chr9:57940112-57962864    | 4.1828   | 3.8669   | -0.1133 | 0.692740 |
| M5C100018Rik  | chr9:67758712-67760208    | 0.7993   | 0.5856   | -0.4489 | 0.623868 |
| Uxt           | chrX:20941721-20962017    | 4.4305   | 3.8900   | -0.1877 | 0.755981 |
| Gm5124        | chrX:21360864-21364622    | 0.7634   | 0.9394   | 0.2993  | 0.612424 |
| Akap17b       | chrX:36608313-36645395    | 1.9808   | 1.8299   | -0.1143 | 0.584157 |
| Cstf2         | chrX:134059186-134086819  | 13.1784  | 13.8138  | 0.0679  | 0.435434 |
| Gm15239       | chrX:167361454-167364421  | 0.7213   | 1.1864   | 0.7180  | 0.700812 |
| Slc25a32      | chr15:39094190-39112716   | 13.7479  | 13.0367  | -0.0766 | 0.747111 |
| Top1mt        | chr15:75657034-75678800   | 7.0731   | 7.7794   | 0.1373  | 0.596089 |
| Chchd1        | chr14:20703026-20704417   | 50.3112  | 55.4101  | 0.1393  | 0.750094 |
| Pde12         | chr14:26659957-26669883   | 9.2878   | 9.8256   | 0.0812  | 0.599582 |
| Gnpnat1       | chr14:45376333-45388802   | 7.3982   | 8.2094   | 0.1501  | 0.687814 |
| Apex1         | chr14:50924967-50927139   | 49.3397  | 47.0493  | -0.0686 | 0.799536 |
| Trav14-3      | chr14:53763082-53765043   | 3.4325   | 2.9634   | -0.2120 | 0.449682 |
| Xpo4          | chr14:57581001-57665430   | 14.2576  | 13.8016  | -0.0469 | 0.747893 |
| Mttr9         | chr14:63523615-63543953   | 15.2163  | 16.2084  | 0.0911  | 0.482926 |
| 4930480K23Rik | chr14:69732783-69767113   | 1.6229   | 1.8455   | 0.1854  | 0.593167 |
| Nudt18        | chr14:70577846-70582571   | 2.4286   | 2.7020   | 0.1539  | 0.627374 |
| Abcc4         | chr14:118482691-118706219 | 13.4042  | 14.1748  | 0.0806  | 0.605337 |
| Gm23833       | chr17:12770630-12770882   | 3.1872   | 4.5936   | 0.5273  | 0.660368 |
| Axin1         | chr17:26138687-26195811   | 28.9898  | 27.9543  | -0.0525 | 0.789267 |
| Abcc10        | chr17:46303220-46328352   | 1.9387   | 1.7949   | -0.1112 | 0.680933 |
| Olfr173       | chr16:58796778-58797942   | 0.3989   | 0.5897   | 0.5639  | 0.509453 |
| Tbc1d10c      | chr19:4184357-4191047     | 195.7489 | 205.1614 | 0.0678  | 0.627949 |
| Gm14966       | chr19:6355521-6363759     | 4.8687   | 4.2178   | -0.2070 | 0.684368 |
| Gng3          | chr19:8836928-8839246     | 2.9179   | 2.5821   | -0.1764 | 0.634146 |
| Abhd17b       | chr19:21653308-21685637   | 13.2753  | 14.4999  | 0.1273  | 0.710278 |
| Gpam          | chr19:55069733-55099451   | 7.1773   | 6.7671   | -0.0849 | 0.747924 |
| Prdx3         | chr19:60864050-60874556   | 56.6684  | 54.3394  | -0.0605 | 0.800144 |
| Gm15832       | chr1:39547569-39552002    | 9.0179   | 8.4752   | -0.0895 | 0.617222 |
| Inpp1         | chr1:52789412-52817688    | 28.6638  | 30.2007  | 0.0753  | 0.421138 |
| Cflar         | chr1:58711507-58758884    | 25.4885  | 24.9624  | -0.0301 | 0.670868 |
| Fam117b       | chr1:59913005-59985346    | 16.6910  | 17.5366  | 0.0713  | 0.474239 |
| Glb1l         | chr1:75198242-75210778    | 4.7587   | 5.1450   | 0.1126  | 0.623809 |
| Nucks1        | chr1:131910457-131936321  | 63.7941  | 66.9032  | 0.0687  | 0.657497 |
| Timm17a       | chr1:135301531-135313778  | 15.8162  | 17.2209  | 0.1228  | 0.669180 |
| Zbtb41        | chr1:139422382-139453005  | 7.9073   | 8.3929   | 0.0860  | 0.600271 |
| Acbd3         | chr1:180726042-180754203  | 20.6114  | 19.9161  | -0.0495 | 0.685582 |
| Angel2        | chr1:190925111-190946962  | 20.3058  | 19.8063  | -0.0359 | 0.611918 |
| Dtl           | chr1:191537364-191575534  | 8.8744   | 8.3368   | -0.0901 | 0.787122 |
| Mpp7          | chr18:7347961-7626863     | 3.7743   | 3.4804   | -0.1170 | 0.733116 |
| Slc25a46      | chr18:31580167-31609902   | 18.8451  | 19.8052  | 0.0717  | 0.404001 |
| Wdr55         | chr18:36760238-36763708   | 37.3322  | 35.8704  | -0.0576 | 0.719847 |
| Hdac3         | chr18:37935843-37954988   | 23.9405  | 25.1285  | 0.0699  | 0.412478 |
| 1700086O06Rik | chr18:38238404-38250565   | 1.9154   | 2.2114   | 0.2073  | 0.418802 |
| Csnk1a1       | chr18:61555273-61590061   | 54.6524  | 56.8235  | 0.0562  | 0.408798 |
| Gm16146       | chr18:84858635-84859547   | 6.2169   | 5.1720   | -0.2655 | 0.680161 |
| Optn          | chr2:5020641-5064051      | 0.7845   | 0.9730   | 0.3106  | 0.698994 |
| Gm13340       | chr2:22588102-22589647    | 1.9084   | 2.2410   | 0.2318  | 0.391320 |
| Ptges2        | chr2:32395895-32402739    | 6.8360   | 7.8306   | 0.1960  | 0.763324 |
| Cybrd1        | chr2:71117922-71142926    | 1.0017   | 0.8616   | -0.2174 | 0.742304 |
| AI847159      | chr2:129158665-129180667  | 1.0511   | 1.3598   | 0.3714  | 0.693475 |
| Gm14276       | chr2:156994234-156994891  | 4.3795   | 3.5947   | -0.2849 | 0.744722 |
| Tcea2         | chr2:181680309-181688071  | 9.4887   | 10.4666  | 0.1415  | 0.706608 |
| Msto1         | chr3:88905106-88913999    | 12.1001  | 11.6497  | -0.0547 | 0.747993 |
| Csde1         | chr3:103020545-103058189  | 122.5724 | 129.0200 | 0.0740  | 0.704620 |
| Tox           | chr4:6686352-6991557      | 12.5399  | 12.1328  | -0.0476 | 0.736782 |
| Zfp292        | chr4:34803112-34882960    | 43.3103  | 42.1529  | -0.0391 | 0.801645 |
| Trmt10b       | chr4:45297126-45316131    | 5.3245   | 6.0444   | 0.1830  | 0.693620 |
| Yipf1         | chr4:107314362-107359823  | 7.6133   | 7.3066   | -0.0593 | 0.745018 |
| NA            | chr4:116033906-116053380  | 4.0063   | 4.4797   | 0.1611  | 0.712737 |
| Ncdn          | chr4:126743749-126753438  | 13.8335  | 13.1662  | -0.0713 | 0.785876 |

|               |                           |          |          |         |          |
|---------------|---------------------------|----------|----------|---------|----------|
| Zmym4         | chr4:126861938-126968135  | 12.8152  | 13.4870  | 0.0737  | 0.573489 |
| Aunip         | chr4:134510998-134523927  | 2.2540   | 2.6810   | 0.2503  | 0.509817 |
| Necap2        | chr4:141066511-141078357  | 24.1946  | 25.5097  | 0.0764  | 0.499029 |
| Fv1           | chr4:147868978-147870358  | 9.8282   | 9.1545   | -0.1024 | 0.602641 |
| Cdk11b        | chr4:155624853-155649938  | 20.6228  | 19.9365  | -0.0488 | 0.733963 |
| Tas1r3        | chr4:155859267-155863362  | 2.0966   | 2.3923   | 0.1904  | 0.669950 |
| Gm12061       | chr11:23894559-23895488   | 6.7382   | 5.5061   | -0.2913 | 0.734815 |
| Rhbdf1        | chr11:32209584-32222300   | 0.2130   | 0.2823   | 0.4062  | 0.509313 |
| Afp           | chr5:90490713-90508907    | 0.9139   | 1.2612   | 0.4646  | 0.712210 |
| Gm26745       | chr5:123047372-123230871  | 0.5950   | 0.8206   | 0.4638  | 0.622770 |
| 493340618Rik  | chr7:114315478-114415161  | 0.3049   | 0.4715   | 0.6289  | 0.576875 |
| Ctxn1         | chr8:4257647-4259274      | 0.7485   | 0.5294   | -0.4996 | 0.629916 |
| Gm26853       | chr8:19789797-19798548    | 0.2697   | 0.3666   | 0.4430  | 0.522805 |
| Zfp964        | chr8:69659262-69664170    | 0.9794   | 1.2635   | 0.3674  | 0.721879 |
| Gm5620        | chr9:91097147-91098500    | 1.3095   | 1.7036   | 0.3795  | 0.702311 |
| Gm14586       | chrX:52772341-52772749    | 1.7056   | 2.4623   | 0.5297  | 0.626736 |
| Ribc1         | chrX:152004581-152016295  | 0.7512   | 1.0821   | 0.5266  | 0.592067 |
| Trav9-1       | chr14:53488044-53488566   | 1.7621   | 1.1436   | -0.6237 | 0.553476 |
| 1700001G11Rik | chr14:66295333-66297129   | 0.5307   | 0.7326   | 0.4650  | 0.426530 |
| Gpr1          | chr1:63182690-63214543    | 0.2422   | 0.3864   | 0.6737  | 0.565101 |
| NA            | chr1:137932040-137933296  | 1.8532   | 1.4302   | -0.3739 | 0.678575 |
| Gm13778       | chr2:91044091-91053933    | 1.3782   | 0.9767   | -0.4968 | 0.601949 |
| mt-Tl2        | chrM:11670-11741          | 10.2254  | 15.4258  | 0.5932  | 0.654581 |
| Ppm1n         | chr7:19276806-19280049    | 0.6168   | 0.4145   | -0.5733 | 0.703612 |
| Adamts8       | chr9:30942561-30963838    | 0.2248   | 0.1617   | -0.4752 | 0.682635 |
| Traj46        | chr14:54172335-54172398   | 22.9200  | 15.5051  | -0.5639 | 0.736116 |
| Vcam1         | chr3:116110019-116129688  | 0.5774   | 0.4055   | -0.5099 | 0.745592 |
| Plp2          | chrX:7667940-7671390      | 10.1398  | 9.3708   | -0.1138 | 0.710492 |
| Sh3bgrl2      | chr9:83548337-83600292    | 1.5339   | 1.7776   | 0.2127  | 0.747765 |
| Lig3          | chr11:82781107-82804274   | 14.9812  | 14.5209  | -0.0450 | 0.772636 |
| Gm16235       | chr10:88444235-88449887   | 2.6266   | 3.5121   | 0.4191  | 0.586205 |
| Mblac2        | chr13:81711416-81753275   | 2.6190   | 2.9424   | 0.1680  | 0.633268 |
| Bicd1         | chr6:149408983-149563329  | 1.4946   | 1.6697   | 0.1599  | 0.745439 |
| Tmem147       | chr7:30727700-30729534    | 30.2090  | 32.8621  | 0.1214  | 0.691602 |
| Rnf19a        | chr15:36239933-36283147   | 44.3081  | 46.8024  | 0.0790  | 0.693585 |
| A330017A19Rik | chr17:46889215-46890405   | 0.7274   | 0.9627   | 0.4043  | 0.463119 |
| Brms1         | chr19:5041403-5049917     | 25.6231  | 27.3382  | 0.0935  | 0.500976 |
| Gm15556       | chr17:47922377-47923429   | 1.9570   | 2.6383   | 0.4310  | 0.627119 |
| Cdk5          | chr5:24418249-24423530    | 15.5947  | 16.7124  | 0.0999  | 0.595617 |
| Kat2b-ps      | chr5:93390601-93393091    | 0.3212   | 0.2292   | -0.4873 | 0.662069 |
| Coq2          | chr5:100654722-100675140  | 12.7299  | 12.0855  | -0.0749 | 0.770159 |
| 1700102P08Rik | chr9:108392833-108397763  | 1.7337   | 2.1279   | 0.2956  | 0.625502 |
| Xkr5          | chr8:18932728-18950975    | 0.4866   | 0.3732   | -0.3826 | 0.691717 |
| A1467606      | chr7:127091435-127094049  | 109.5497 | 107.1304 | -0.0322 | 0.760449 |
| Trim36        | chr18:46165301-46212607   | 0.1605   | 0.2346   | 0.5479  | 0.662732 |
| Btn15-ps      | chr17:34488069-34497429   | 1.2612   | 1.6337   | 0.3734  | 0.674957 |
| Rpap2         | chr5:107597372-107661838  | 12.8108  | 13.5342  | 0.0793  | 0.373152 |
| B430218F22Rik | chr13:118386629-118388124 | 8.2958   | 9.2014   | 0.1495  | 0.677377 |
| Lrmp          | chr6:145115652-145174934  | 56.0959  | 59.0107  | 0.0731  | 0.676245 |
| Rpl31-ps8     | chr15:90764245-90764679   | 13.6329  | 15.8686  | 0.2191  | 0.669957 |
| NA            | chr17:17374331-17394898   | 17.1621  | 18.3577  | 0.0972  | 0.685576 |
| Bscl2         | chr19:8837466-8848683     | 10.3413  | 9.9901   | -0.0498 | 0.717947 |
| Snord45c      | chr3:153912124-153912204  | 41.5635  | 52.6835  | 0.3420  | 0.612950 |
| Gm5595        | chr7:42660104-42692718    | 0.6043   | 0.7891   | 0.3850  | 0.588275 |
| Hbs1l         | chr10:21295978-21368889   | 19.4727  | 20.7233  | 0.0898  | 0.693434 |
| Gipc3         | chr10:81337761-81343266   | 0.7113   | 0.4294   | -0.7282 | 0.705099 |
| Atp2b1        | chr10:98915151-99026143   | 43.2116  | 45.2229  | 0.0656  | 0.636239 |
| Ccdc59        | chr10:105841066-105847833 | 13.8608  | 13.4179  | -0.0468 | 0.700422 |
| Cdkn2aipnl    | chr11:51967660-51977334   | 52.4503  | 50.9619  | -0.0415 | 0.733779 |
| Tnfp1         | chr11:54910784-54962917   | 42.4250  | 41.3386  | -0.0374 | 0.774329 |
| Ggnbp2        | chr11:84832360-84870817   | 39.6250  | 38.7210  | -0.0333 | 0.755544 |
| Ube2z         | chr11:96047431-96065388   | 28.5609  | 27.7418  | -0.0420 | 0.768236 |
| Smarcd2       | chr11:106263178-106272972 | 54.9894  | 53.8882  | -0.0292 | 0.725457 |
| Birc5         | chr11:117849250-117855743 | 9.7058   | 10.3711  | 0.0956  | 0.622114 |
| Mipol1        | chr12:57230426-57497199   | 1.1762   | 1.2942   | 0.1380  | 0.534825 |
| Vti1b         | chr12:79156016-79172667   | 34.3117  | 36.6519  | 0.0952  | 0.701490 |
| Cep128        | chr12:90998491-91384409   | 2.2406   | 2.0962   | -0.0961 | 0.779333 |
| C78339        | chr13:46669521-46678056   | 19.9529  | 19.2510  | -0.0517 | 0.789178 |
| Ippk          | chr13:49421310-49462990   | 12.0633  | 11.4890  | -0.0704 | 0.726809 |
| Rnf44         | chr13:54679398-54693907   | 9.2275   | 8.8703   | -0.0570 | 0.743412 |
| Ctla2a        | chr13:60934154-60936625   | 7.0781   | 7.8659   | 0.1523  | 0.643678 |

|               |                           |          |          |         |          |
|---------------|---------------------------|----------|----------|---------|----------|
| Mctp1         | chr13:76384534-77031810   | 1.5755   | 1.4447   | -0.1250 | 0.714880 |
| Gm9752        | chr13:119473803-119476761 | 12.2830  | 13.3305  | 0.1181  | 0.706967 |
| Abcb8         | chr5:24393662-24410054    | 7.8692   | 7.5450   | -0.0607 | 0.705683 |
| Hip1r         | chr5:123973627-124003211  | 28.1499  | 29.8469  | 0.0845  | 0.715041 |
| Mdh2          | chr5:135778479-135790398  | 55.4941  | 53.6408  | -0.0490 | 0.805435 |
| Eif2ak1       | chr5:143817787-143904256  | 12.4814  | 12.0489  | -0.0509 | 0.781608 |
| Shfm1         | chr6:6557293-6578658      | 55.9650  | 59.9620  | 0.0995  | 0.745862 |
| Gm27019       | chr6:31063091-31063495    | 5.9250   | 5.0189   | -0.2394 | 0.585103 |
| Akr1b8        | chr6:34354118-34368463    | 0.6275   | 0.4447   | -0.4967 | 0.693478 |
| Trbv5         | chr6:41062358-41062803    | 68.8729  | 74.5116  | 0.1135  | 0.653017 |
| Trbv31        | chr6:41557690-41558371    | 60.3853  | 65.6636  | 0.1209  | 0.634943 |
| Suclg2        | chr6:95474133-95718837    | 11.0112  | 11.8272  | 0.1031  | 0.596503 |
| Tamm41        | chr6:115004380-115037876  | 3.4112   | 3.2270   | -0.0801 | 0.429390 |
| Mrp151        | chr6:125191800-125195583  | 8.3257   | 8.8731   | 0.0919  | 0.214322 |
| Plbd1         | chr6:136612069-136661928  | 0.9432   | 1.2331   | 0.3867  | 0.688427 |
| Tsen34        | chr7:3693374-3701023      | 3.0667   | 3.5072   | 0.1936  | 0.676964 |
| Zfp580        | chr7:5051531-5053722      | 0.8444   | 0.6147   | -0.4580 | 0.477890 |
| Ppp1r37       | chr7:19530966-19562398    | 13.6927  | 13.1463  | -0.0588 | 0.726774 |
| Prmt3         | chr7:49778345-49858265    | 25.5823  | 24.4415  | -0.0658 | 0.807234 |
| Chsy1         | chr7:66109514-66173789    | 10.8064  | 11.4822  | 0.0875  | 0.589017 |
| Lat           | chr7:126363831-126369543  | 385.0518 | 376.8953 | -0.0309 | 0.821720 |
| Pagr1a        | chr7:127001481-127020327  | 14.6018  | 15.3614  | 0.0732  | 0.450610 |
| Ilgad         | chr7:128154375-128223816  | 0.3971   | 0.5184   | 0.3844  | 0.595494 |
| Tacc2         | chr7:130577483-130764784  | 0.5423   | 0.4862   | -0.1574 | 0.510704 |
| Cars2         | chr8:11514020-11550771    | 14.7520  | 14.1048  | -0.0647 | 0.589248 |
| Mast3         | chr8:70778116-70792433    | 16.7016  | 17.6876  | 0.0828  | 0.678092 |
| B3gnt3        | chr8:71691718-71701800    | 2.4175   | 2.7402   | 0.1807  | 0.377253 |
| Adcy7         | chr8:88272402-88329962    | 75.1778  | 73.3768  | -0.0350 | 0.818071 |
| Osgin1        | chr8:119434123-119446256  | 1.3046   | 1.5130   | 0.2138  | 0.447374 |
| Cog2          | chr8:124520766-124552008  | 16.1105  | 15.5789  | -0.0484 | 0.751213 |
| Zbtb44        | chr9:31030643-31075879    | 9.4819   | 10.0556  | 0.0848  | 0.677157 |
| Arhgef12      | chr9:42963841-43105718    | 10.2344  | 10.8912  | 0.0897  | 0.717735 |
| AU019823      | chr9:50605239-50617464    | 8.1251   | 8.7641   | 0.1092  | 0.710606 |
| Z300009A05Rik | chr9:63394446-63399244    | 16.4772  | 18.1963  | 0.1432  | 0.521683 |
| Rp2h          | chrX:20364480-20405653    | 7.0954   | 7.5872   | 0.0967  | 0.628432 |
| Sept6         | chrX:36911325-36991794    | 31.4610  | 32.8126  | 0.0607  | 0.559388 |
| Hnrnp2        | chrX:134601178-134607060  | 15.5997  | 16.4945  | 0.0805  | 0.586718 |
| 9130401M01Rik | chr15:58022275-58076425   | 20.8762  | 22.4339  | 0.1038  | 0.653558 |
| 9930014A18Rik | chr15:60822964-60831793   | 1.3258   | 1.4831   | 0.1617  | 0.564628 |
| Nol12         | chr15:78934932-78943634   | 5.0676   | 5.5214   | 0.1237  | 0.680531 |
| Polr3h        | chr15:81915029-81926213   | 8.8964   | 9.6938   | 0.1238  | 0.658526 |
| Zfp740        | chr15:102203647-102215606 | 43.4611  | 45.3740  | 0.0621  | 0.495155 |
| Arf4          | chr14:26638073-26665084   | 20.1270  | 19.3316  | -0.0582 | 0.745060 |
| Parg          | chr14:32201948-32297550   | 29.6068  | 28.7846  | -0.0406 | 0.802742 |
| Traj36        | chr14:54182401-54182464   | 52.0879  | 61.0406  | 0.2288  | 0.626048 |
| Pspc1         | chr14:56722440-56778316   | 16.7621  | 16.1805  | -0.0509 | 0.762453 |
| Lsm2          | chr17:34981861-34985891   | 7.1284   | 6.7549   | -0.0776 | 0.626332 |
| Ticam1        | chr17:56269318-56276786   | 5.1434   | 4.7729   | -0.1078 | 0.686570 |
| Zfp148        | chr16:33380774-33503903   | 20.3339  | 19.9243  | -0.0294 | 0.654358 |
| Gm26667       | chr16:84713022-84715242   | 32.1312  | 30.6707  | -0.0671 | 0.756253 |
| Banf1         | chr19:5364640-5366645     | 59.6766  | 64.3743  | 0.1093  | 0.722725 |
| Got1          | chr19:43499751-43524605   | 13.5488  | 12.9938  | -0.0603 | 0.627178 |
| Mitd1         | chr1:37874800-37890411    | 23.7337  | 25.0602  | 0.0785  | 0.567347 |
| Casp8         | chr1:58795373-58847503    | 88.4176  | 86.2859  | -0.0352 | 0.786025 |
| Gm11579       | chr1:60776664-60781834    | 10.0158  | 9.1723   | -0.1269 | 0.630242 |
| Cnst          | chr1:179546369-179627478  | 10.2059  | 9.9178   | -0.0413 | 0.748409 |
| Rnmt          | chr18:68300354-68324852   | 12.4109  | 12.0017  | -0.0484 | 0.774822 |
| Tcf4          | chr18:69344145-69687967   | 0.7483   | 0.6840   | -0.1296 | 0.690756 |
| Gm16286       | chr18:80206764-80212741   | 38.8224  | 37.8517  | -0.0365 | 0.748059 |
| Gm13433       | chr2:25543478-25543718    | 12.6930  | 10.3379  | -0.2961 | 0.763289 |
| 1700029I15Rik | chr2:92382917-92385708    | 3.3160   | 4.0292   | 0.2810  | 0.600691 |
| Psmf1         | chr2:151715811-151744186  | 6.1570   | 5.9063   | -0.0600 | 0.706968 |
| Rbm39         | chr2:156147238-156180238  | 135.1458 | 141.1885 | 0.0631  | 0.655973 |
| Hist2h3c1     | chr3:96246684-96248509    | 1.2100   | 1.4934   | 0.3036  | 0.683018 |
| Fam214b       | chr4:43032413-43046220    | 2.5336   | 2.9212   | 0.2054  | 0.745297 |
| Acot11        | chr4:106744554-106804998  | 6.1363   | 6.5710   | 0.0987  | 0.644850 |
| A730015C16Rik | chr4:108847398-108848619  | 8.3733   | 9.2898   | 0.1499  | 0.601387 |
| Gm22213       | chr13:44838164-44838283   | 3.9477   | 6.0884   | 0.6251  | 0.555592 |
| Prdm5         | chr6:65778987-65936373    | 0.5150   | 0.6660   | 0.3709  | 0.685160 |
| Efcab12       | chr6:115810728-115838412  | 0.2841   | 0.1908   | -0.5741 | 0.552839 |
| Rps13         | chr7:116331506-116334190  | 5.2569   | 6.7308   | 0.3566  | 0.677089 |

|               |                           |          |          |         |          |
|---------------|---------------------------|----------|----------|---------|----------|
| Gm5913        | chr8:97427711-97429110    | 0.5232   | 0.7776   | 0.5715  | 0.640658 |
| Gm24339       | chr9:15326463-15326539    | 64.7763  | 52.0536  | -0.3155 | 0.736252 |
| Aldh3b1       | chr19:3913492-3929761     | 0.9410   | 1.2347   | -0.3919 | 0.595076 |
| 4933408B17Rik | chr18:34579845-34597468   | 0.7143   | 0.5326   | -0.4235 | 0.717803 |
| Ncor2         | chr5:125017152-125179219  | 2.8950   | 2.7075   | -0.0966 | 0.824108 |
| Ercc4         | chr16:13109683-13150617   | 6.8698   | 7.2511   | 0.0779  | 0.289550 |
| Cirh1a        | chr8:106893639-106923093  | 31.3450  | 29.9956  | -0.0635 | 0.795385 |
| Mfng          | chr15:7875881-78773475    | 27.0345  | 28.6538  | 0.0839  | 0.676321 |
| Xpnp1         | chr19:52943416-53040214   | 7.8738   | 8.3056   | 0.0770  | 0.499406 |
| Mycbp         | chr4:123904831-123912269  | 5.8375   | 5.4651   | -0.0951 | 0.678688 |
| Gm23991       | chr7:44250449-44250542    | 26.1773  | 21.5269  | -0.2822 | 0.720120 |
| Gna12         | chr5:140758407-140830431  | 9.9424   | 10.6836  | 0.1037  | 0.714965 |
| Fpgt          | chr3:155084920-155093378  | 12.7917  | 13.5518  | 0.0833  | 0.486336 |
| Qrs1          | chr10:43874187-43901745   | 5.8476   | 6.2983   | 0.1071  | 0.561716 |
| Dnajb12       | chr10:59879555-59899302   | 9.9428   | 9.5140   | -0.0636 | 0.713266 |
| Gm26710       | chr10:80578646-80580677   | 0.9486   | 0.7469   | -0.3449 | 0.709279 |
| Xrcc6bp1      | chr10:126868429-126901371 | 6.0155   | 5.4325   | -0.1471 | 0.714627 |
| 4930563E22Rik | chr11:72215137-72218450   | 0.7205   | 0.6073   | -0.2466 | 0.565145 |
| Spns2         | chr11:72451637-72489904   | 0.3117   | 0.3887   | 0.3185  | 0.548263 |
| Ywhae         | chr11:75732868-75765845   | 42.8514  | 41.6742  | -0.0402 | 0.778896 |
| Fam57a        | chr11:76179670-76214827   | 5.8039   | 6.1771   | 0.0899  | 0.550336 |
| Cwc25         | chr11:97745480-97766556   | 7.3019   | 7.7949   | 0.0943  | 0.611426 |
| Fscn2         | chr11:120361533-120368168 | 0.7316   | 0.5451   | -0.4244 | 0.734210 |
| Slc25a10      | chr11:120491839-120499187 | 2.1945   | 2.4448   | 0.1558  | 0.600119 |
| Stra13        | chr11:120710941-120713738 | 12.8070  | 14.1050  | 0.1393  | 0.673351 |
| Hexdc         | chr11:121204432-121222655 | 1.9464   | 2.1519   | 0.1448  | 0.614536 |
| Dcaf4         | chr12:83520465-83541988   | 12.4496  | 13.3268  | 0.0982  | 0.556667 |
| Wrrn1p1       | chr13:32802037-32822609   | 27.8825  | 29.3960  | 0.0763  | 0.641094 |
| Thoc3         | chr13:54458836-54468849   | 22.9074  | 22.1571  | -0.0480 | 0.671799 |
| Cenpc1        | chr5:86012042-86065583    | 17.5154  | 18.6038  | 0.0870  | 0.633457 |
| Ccdc92        | chr5:124834417-124862424  | 3.1165   | 2.8340   | -0.1371 | 0.708793 |
| Gnb2          | chr5:137528126-137533510  | 58.3858  | 56.4470  | -0.0487 | 0.840294 |
| Irak2         | chr6:113638466-113695009  | 8.8939   | 9.5787   | 0.1070  | 0.699749 |
| Ceacam15      | chr7:16671330-16675705    | 3.9766   | 3.4649   | -0.1987 | 0.777365 |
| Lysmd4        | chr7:67222543-67228468    | 3.9915   | 3.7510   | -0.0896 | 0.570876 |
| ldh2          | chr7:80094845-80115392    | 12.4557  | 13.3131  | 0.0960  | 0.588267 |
| Arntl         | chr7:113207464-113314122  | 16.6311  | 17.5818  | 0.0802  | 0.512551 |
| NA            | chr7:119739925-119742226  | 1.0649   | 1.3833   | 0.3774  | 0.576305 |
| Ifitm1        | chr7:140967220-140969825  | 1.1327   | 0.8419   | -0.4281 | 0.623494 |
| Ssbp4         | chr8:70597490-70608314    | 41.3942  | 39.5632  | -0.0653 | 0.812180 |
| Fam32a        | chr8:72219729-72223764    | 57.6541  | 55.7625  | -0.0481 | 0.812650 |
| Vat1l         | chr8:114205611-114374071  | 0.2568   | 0.3513   | 0.4524  | 0.773187 |
| Gm25791       | chr9:15314844-15314981    | 52.0408  | 59.1982  | 0.1859  | 0.697284 |
| Tmem218       | chr9:37208332-37223210    | 2.1278   | 2.7120   | 0.3500  | 0.559450 |
| Adam10        | chr9:70678996-70780229    | 29.2067  | 30.7433  | 0.0740  | 0.663029 |
| Esyt3         | chr9:99309966-99358530    | 0.1765   | 0.1193   | -0.5658 | 0.706249 |
| Vill          | chr9:119052777-119071525  | 5.4930   | 5.9831   | 0.1233  | 0.715002 |
| Renbp         | chrX:73922120-73930850    | 1.3269   | 1.1121   | -0.2548 | 0.728742 |
| Cela1         | chr15:100674424-100687920 | 1.9581   | 2.3805   | 0.2818  | 0.634440 |
| Smim4         | chr14:31088868-31128930   | 9.2326   | 10.4565  | 0.1796  | 0.500394 |
| Mtch1         | chr17:29332071-29347904   | 27.0243  | 28.4380  | 0.0736  | 0.573184 |
| H2-Q2         | chr17:35342241-35346762   | 2.2353   | 1.9362   | -0.2073 | 0.763404 |
| Polh          | chr17:46172003-46202625   | 19.0899  | 20.2036  | 0.0818  | 0.526252 |
| Xpo5          | chr17:46202854-46242299   | 29.4641  | 28.6154  | -0.0422 | 0.755113 |
| Cdip1         | chr16:4750347-4790292     | 13.2810  | 12.9140  | -0.0404 | 0.657425 |
| Itsn1         | chr16:91729280-91920597   | 0.2609   | 0.2949   | 0.1767  | 0.564781 |
| Zdhhc24       | chr19:4878667-4885397     | 3.8970   | 3.6097   | -0.1105 | 0.665706 |
| 4833407H14Rik | chr19:53460630-53462723   | 5.6214   | 6.3432   | 0.1743  | 0.663119 |
| Bzw1          | chr1:58393135-58406548    | 103.6805 | 108.8876 | 0.0707  | 0.709411 |
| Creb1         | chr1:64532803-64604547    | 32.1312  | 33.6940  | 0.0685  | 0.681040 |
| Serpine2      | chr1:79794196-79858696    | 0.5708   | 0.4713   | -0.2763 | 0.647703 |
| Cep76         | chr18:67617396-67641336   | 3.8011   | 4.1895   | 0.1404  | 0.679164 |
| Gm13293       | chr2:11339488-11342612    | 1.0639   | 1.4335   | 0.4302  | 0.417044 |
| 6530402F18Rik | chr2:29245106-29253006    | 9.6039   | 9.1136   | -0.0756 | 0.797754 |
| Cstf3         | chr2:104590522-104665429  | 6.1870   | 6.6058   | 0.0945  | 0.579947 |
| Lrrc57        | chr2:120604237-120609520  | 8.9996   | 9.7585   | 0.1168  | 0.668198 |
| Usp50         | chr2:126709095-126783458  | 0.6976   | 0.5422   | -0.3635 | 0.675610 |
| 1700037H04Rik | chr2:131146324-131160081  | 4.7439   | 4.2903   | -0.1450 | 0.764189 |
| Dtd1          | chr2:144599896-144768758  | 10.3305  | 9.7912   | -0.0774 | 0.722882 |
| Gm14290       | chr2:167098793-167101826  | 1.0954   | 0.9277   | -0.2396 | 0.359809 |
| Tmem189       | chr2:167642607-167689822  | 15.4261  | 16.4766  | 0.0950  | 0.709746 |

|                |                           |          |          |         |          |
|----------------|---------------------------|----------|----------|---------|----------|
| Man1a2         | chr3:100562207-100685503  | 21.5238  | 20.9991  | -0.0356 | 0.758326 |
| Lrrc40         | chr3:158036661-158068478  | 8.3846   | 8.0315   | -0.0621 | 0.735188 |
| Plag1          | chr4:3900995-3938423      | 0.3468   | 0.4218   | 0.2822  | 0.692772 |
| At1l           | chr12:69893104-69964085   | 0.2567   | 0.3632   | 0.5008  | 0.654155 |
| Plek2          | chr12:78888690-78906964   | 0.4857   | 0.7180   | 0.5640  | 0.671719 |
| Snora28        | chr12:111540940-111541067 | 20.1591  | 25.6849  | 0.3495  | 0.633077 |
| 1700047A11Rik  | chr8:26082608-26102694    | 3.0544   | 3.9228   | 0.3610  | 0.697880 |
| 4931403E22Rik  | chr19:26768800-26823907   | 1.5764   | 2.3404   | 0.5702  | 0.671254 |
| Enpep          | chr3:129269174-129332720  | 0.2179   | 0.1430   | -0.6076 | 0.733540 |
| Gm19684        | chr17:36121677-36129692   | 2.5445   | 2.2334   | -0.1882 | 0.619477 |
| Marf1          | chr16:14109165-14159274   | 27.5429  | 26.8486  | -0.0368 | 0.805589 |
| Rtn3           | chr19:7425900-7483289     | 15.7221  | 15.2330  | -0.0456 | 0.782208 |
| Nespas         | chr2:174281236-174295436  | 1.7039   | 1.4742   | -0.2089 | 0.743788 |
| Osbp12         | chr2:180119305-180162680  | 15.4439  | 15.0290  | -0.0393 | 0.486307 |
| Cc1c1          | chr3:108653912-108678840  | 12.3264  | 13.1274  | 0.0908  | 0.665265 |
| Tstd2          | chr4:46114745-46138694    | 12.1833  | 11.7589  | -0.0511 | 0.762657 |
| Gm11739        | chr11:116466318-116474274 | 3.5300   | 4.5262   | 0.3587  | 0.685348 |
| n-R5s40        | chr15:79629501-79692625   | 4.1329   | 6.6765   | 0.6919  | 0.708391 |
| Pot1a          | chr6:25743736-25809246    | 6.2994   | 6.0901   | -0.0488 | 0.705335 |
| Pagr1b         | chr7:127001479-127016484  | 46.6731  | 49.6612  | 0.0895  | 0.459722 |
| Gbf1           | chr19:46152508-46286510   | 9.0733   | 8.8054   | -0.0433 | 0.737392 |
| Gm22643        | chr9:13621225-13621326    | 8.5443   | 6.1548   | -0.4733 | 0.604029 |
| Gm13708        | chr2:73459704-73477602    | 4.1991   | 5.5048   | 0.3906  | 0.686765 |
| Rundc3a        | chr11:102393402-102402555 | 7.8528   | 8.5156   | 0.1169  | 0.716041 |
| Ggact          | chr14:122816222-122913757 | 14.1116  | 13.3778  | -0.0770 | 0.761931 |
| Metrn          | chr17:25794570-25797136   | 9.6081   | 10.7219  | 0.1582  | 0.748860 |
| Mir26b         | chr1:74394309-74394394    | 14.0463  | 18.6093  | 0.4058  | 0.654489 |
| Nol4l          | chr2:153407461-153529971  | 1.3896   | 1.2612   | -0.1398 | 0.813144 |
| Isca1          | chr13:59755408-59769810   | 2.8931   | 3.1730   | 0.1333  | 0.552081 |
| Zfp605         | chr5:110110091-110129794  | 4.3588   | 4.0450   | -0.1078 | 0.780768 |
| Acy1           | chr9:106432995-106438236  | 8.5090   | 7.9335   | -0.1010 | 0.668745 |
| Mgst3          | chr1:167371965-167393841  | 0.7613   | 1.0992   | 0.5299  | 0.699133 |
| Thoc1          | chr18:9958179-9995484     | 22.0801  | 23.1915  | 0.0708  | 0.509552 |
| Fgr            | chr4:132974094-133001910  | 2.8007   | 3.0705   | 0.1327  | 0.577383 |
| Gm16552        | chr5:121717665-121727403  | 0.6859   | 1.1030   | 0.6854  | 0.615679 |
| Gm15161        | chrX:151783521-151783908  | 2.5991   | 1.7746   | -0.5506 | 0.711038 |
| Tmod3          | chr9:75497795-75559657    | 47.1468  | 49.4302  | 0.0682  | 0.653289 |
| NA             | chr19:8770995-8772475     | 17.9053  | 16.3172  | -0.1340 | 0.755185 |
| Smad4          | chr18:73639008-73703780   | 29.6769  | 28.9893  | -0.0338 | 0.664177 |
| Zfp639         | chr3:32515294-32520685    | 28.0265  | 26.8169  | -0.0636 | 0.754779 |
| 2810429I04Rik  | chr13:3478242-3494398     | 0.2083   | 0.2767   | 0.4101  | 0.704623 |
| Hgf            | chr5:16553549-16619439    | 2.3346   | 2.0503   | -0.1873 | 0.775818 |
| Bbc3           | chr7:16309615-16318205    | 5.7881   | 5.2462   | -0.1418 | 0.794849 |
| Zfp574         | chr7:25077204-25083492    | 7.1345   | 6.7822   | -0.0731 | 0.764043 |
| Deaf1          | chr7:141297175-141327725  | 5.5344   | 5.1659   | -0.0994 | 0.648776 |
| Lemd2          | chr17:27189600-27204438   | 20.9320  | 22.1488  | 0.0815  | 0.613396 |
| Osbp           | chr19:11965843-11994105   | 24.7678  | 24.1029  | -0.0393 | 0.767056 |
| Trav2          | chr14:52567292-52568051   | 1.5112   | 2.3017   | 0.6070  | 0.593921 |
| Msh5           | chr17:35028604-35046745   | 0.3680   | 0.4838   | 0.3948  | 0.696542 |
| Fsd2           | chr7:81533307-81566944    | 4.8073   | 4.4651   | -0.1065 | 0.777615 |
| Dnajb2         | chr1:75236464-75244804    | 5.7589   | 5.2698   | -0.1280 | 0.514641 |
| Fbxo22         | chr9:55208924-55224433    | 24.1067  | 23.3967  | -0.0431 | 0.685753 |
| E430025E21Rik  | chr15:59331997-59374167   | 20.7201  | 20.1603  | -0.0395 | 0.675021 |
| Ipcef1         | chr10:6885795-7052478     | 57.2177  | 56.3808  | -0.0213 | 0.779194 |
| Gm17455        | chr10:60399725-60403556   | 1.2882   | 1.6088   | 0.3206  | 0.523720 |
| 2510003E04Rik  | chr10:62538625-62578457   | 4.4245   | 4.2207   | -0.0680 | 0.745940 |
| Slc25a16       | chr10:62920632-62946498   | 4.6982   | 4.4266   | -0.0859 | 0.795142 |
| Ccdc6          | chr10:70097120-70193200   | 10.0539  | 10.5678  | 0.0719  | 0.581007 |
| Trappc10       | chr10:78186724-78244642   | 32.4557  | 31.7690  | -0.0309 | 0.820634 |
| Palm           | chr10:79793571-79820896   | 0.5984   | 0.4560   | -0.3920 | 0.742317 |
| Cnn2           | chr10:79988583-79996062   | 266.8638 | 277.8398 | 0.0581  | 0.665458 |
| S1pr4          | chr10:81497744-81500132   | 62.4614  | 60.7588  | -0.0399 | 0.827807 |
| AU041133       | chr10:82138252-82152011   | 7.0345   | 7.6208   | 0.1155  | 0.349515 |
| Poc1b          | chr10:99107035-99198074   | 4.2568   | 4.5896   | 0.1086  | 0.578100 |
| Rab21          | chr10:115289862-115315591 | 30.6781  | 32.2377  | 0.0715  | 0.504371 |
| Cct2           | chr10:117050997-117063814 | 234.4685 | 228.1248 | -0.0396 | 0.859048 |
| Mbd6           | chr10:127281955-127289018 | 3.3638   | 3.1475   | -0.0959 | 0.737682 |
| Snora5c        | chr11:6620318-6620454     | 10.8015  | 7.9568   | -0.4410 | 0.655686 |
| Etaa1          | chr11:17938755-17953875   | 6.9639   | 6.6586   | -0.0647 | 0.746903 |
| Ccng1          | chr11:40748551-40755311   | 105.5376 | 110.3547 | 0.0644  | 0.736213 |
| 9930111J21Rik2 | chr11:49015873-49051242   | 10.9207  | 11.5248  | 0.0777  | 0.674464 |

|               |                           |          |          |         |          |
|---------------|---------------------------|----------|----------|---------|----------|
| Hnrnpab       | chr11:51600099-51606847   | 164.0672 | 160.5876 | -0.0309 | 0.839105 |
| Hint1         | chr11:54866382-54870501   | 112.1209 | 118.5780 | 0.0808  | 0.750369 |
| Atox1         | chr11:55446640-55461239   | 58.1489  | 54.6584  | -0.0893 | 0.802321 |
| Gm12238       | chr11:55482705-55482829   | 12.7775  | 16.3427  | 0.3550  | 0.738640 |
| Flii          | chr11:60714122-60727263   | 52.9703  | 51.8990  | -0.0295 | 0.795138 |
| Zfp286        | chr11:62753376-62789462   | 0.7183   | 0.6230   | -0.2055 | 0.717625 |
| Trim16        | chr11:62820230-62850808   | 1.2197   | 1.0845   | -0.1695 | 0.713445 |
| Cox10         | chr11:63962626-64079468   | 7.2236   | 6.8834   | -0.0696 | 0.681205 |
| Zbtb4         | chr11:69765911-69784023   | 13.3424  | 12.9987  | -0.0376 | 0.764091 |
| Aatf          | chr11:84422854-84513522   | 26.4878  | 25.6929  | -0.0440 | 0.807783 |
| 4930502E09Rik | chr11:84829177-84830868   | 2.3776   | 1.9551   | -0.2823 | 0.707421 |
| Utp18         | chr11:93859242-93885766   | 30.7099  | 29.7605  | -0.0453 | 0.836291 |
| Abcc3         | chr11:94343294-94392997   | 1.0521   | 0.9187   | -0.1955 | 0.810510 |
| Prr15l        | chr11:96928103-96937830   | 0.3239   | 0.2441   | -0.4083 | 0.707370 |
| Pgap3         | chr11:98388676-98400490   | 2.6767   | 2.9661   | 0.1481  | 0.677187 |
| Dhx58os       | chr11:100687416-100697520 | 1.5405   | 1.8530   | 0.2665  | 0.689219 |
| Mpp2          | chr11:102057014-102088515 | 1.5775   | 1.4181   | -0.1536 | 0.796309 |
| Nmt1          | chr11:103028189-103068912 | 24.5838  | 24.0335  | -0.0327 | 0.794358 |
| Gm26520       | chr12:3343815-3357153     | 2.6168   | 2.2762   | -0.2012 | 0.723504 |
| Adam17        | chr12:21323508-21373632   | 22.3474  | 23.2506  | 0.0572  | 0.552484 |
| Ap4s1         | chr12:51690965-51738939   | 20.6276  | 19.5653  | -0.0763 | 0.708067 |
| Eapp          | chr12:54670339-54695897   | 11.2855  | 11.9161  | 0.0784  | 0.638544 |
| Gm9812        | chr12:55820610-55821580   | 6.6334   | 6.0015   | -0.1444 | 0.732888 |
| Slc38a6       | chr12:73286778-73354049   | 1.2498   | 1.3675   | 0.1299  | 0.496669 |
| Zbtb25        | chr12:76347781-76369602   | 7.8556   | 7.5391   | -0.0593 | 0.190844 |
| Mpp5          | chr12:78748946-78840711   | 11.9737  | 11.5492  | -0.0521 | 0.827328 |
| Gm26669       | chr12:80108033-80113000   | 33.8191  | 32.7382  | -0.0469 | 0.736560 |
| Gm26571       | chr12:83950689-83951355   | 9.8481   | 11.0922  | 0.1716  | 0.673763 |
| Gm26698       | chr12:86891403-86892567   | 2.8368   | 3.3568   | 0.2428  | 0.663714 |
| 3300002A11Rik | chr12:99341153-99361827   | 3.2123   | 2.4959   | -0.3641 | 0.756468 |
| Atxn3         | chr12:101918900-101958246 | 13.8125  | 14.5182  | 0.0719  | 0.572265 |
| Gm2800        | chr12:107183554-107186734 | 4.3665   | 3.5031   | -0.3178 | 0.633435 |
| Wdr20         | chr12:110737948-110795028 | 14.0968  | 15.1133  | 0.1005  | 0.725350 |
| Jag2          | chr12:112908589-112929495 | 0.8011   | 0.7080   | -0.1784 | 0.644825 |
| Gm26583       | chr12:112946362-112950512 | 3.3345   | 3.1172   | -0.0972 | 0.726138 |
| Rapgef5       | chr12:117516478-117756978 | 2.2246   | 2.4907   | 0.1630  | 0.738952 |
| Gm6768        | chr12:119260933-119264272 | 0.5667   | 0.4423   | -0.3576 | 0.688052 |
| Edaradd       | chr13:12471208-12520450   | 0.5634   | 0.6592   | 0.2266  | 0.735189 |
| Gm17084       | chr13:34033062-34037147   | 8.7603   | 8.4538   | -0.0514 | 0.717006 |
| Hivep1        | chr13:42052020-42185026   | 8.2230   | 7.9735   | -0.0445 | 0.804635 |
| Hnrnpk        | chr13:58391141-58403343   | 68.7935  | 71.4375  | 0.0544  | 0.521066 |
| Gm5141        | chr13:62773607-62777089   | 4.5942   | 5.1152   | 0.1550  | 0.613308 |
| Zfp708        | chr13:67069399-67097976   | 4.6447   | 5.1403   | 0.1463  | 0.726560 |
| Zfp65         | chr13:67705305-67729119   | 9.4087   | 9.0628   | -0.0540 | 0.769388 |
| Rfesd         | chr13:76001534-76018712   | 6.7935   | 7.2920   | 0.1022  | 0.669472 |
| Poc5          | chr13:96388293-96415587   | 10.8875  | 11.5803  | 0.0890  | 0.526870 |
| Ankdd1b       | chr13:96416133-96471198   | 0.6367   | 0.4986   | -0.3529 | 0.704621 |
| Gfm2          | chr13:97137936-97181195   | 10.3522  | 10.8081  | 0.0622  | 0.590144 |
| Pde4d         | chr13:108449947-109953461 | 2.3598   | 2.5139   | 0.0912  | 0.664133 |
| Fam133b       | chr5:3543843-3569810      | 22.0903  | 23.5699  | 0.0935  | 0.662984 |
| Srpk2         | chr5:23503355-23616571    | 20.3400  | 19.9352  | -0.0290 | 0.725313 |
| Tmub1         | chr5:24445457-24447854    | 13.6169  | 12.9457  | -0.0729 | 0.744107 |
| Fam53a        | chr5:33600350-33629635    | 7.3397   | 7.1268   | -0.0425 | 0.796936 |
| Slain2        | chr5:72914303-72978829    | 16.7663  | 17.5051  | 0.0622  | 0.610568 |
| Cep135        | chr5:76588697-76646466    | 9.7235   | 10.3157  | 0.0853  | 0.701627 |
| Lrrc8d        | chr5:105699968-105832436  | 2.6340   | 2.8300   | 0.1035  | 0.706018 |
| Glmn          | chr5:107548966-107597888  | 6.4153   | 7.0117   | 0.1282  | 0.729297 |
| Git2          | chr5:114727406-114775517  | 22.7094  | 22.0686  | -0.0413 | 0.847672 |
| Srsf9         | chr5:115327176-115333080  | 27.9461  | 29.8802  | 0.0965  | 0.691125 |
| Dtx1          | chr5:120680201-120711927  | 62.2532  | 66.0294  | 0.0850  | 0.762775 |
| Kdm2b         | chr5:122870667-123015080  | 9.7873   | 9.5065   | -0.0420 | 0.805506 |
| Vps33a        | chr5:123528763-123573015  | 16.1546  | 15.7511  | -0.0365 | 0.691254 |
| Agfg2         | chr5:137650482-137684726  | 9.1762   | 9.7438   | 0.0866  | 0.642595 |
| Cops6         | chr5:138161070-138164646  | 20.5211  | 21.8186  | 0.0885  | 0.694914 |
| Pms2          | chr5:143909963-143937309  | 8.1760   | 7.9504   | -0.0404 | 0.693587 |
| Katnal1       | chr5:148874331-148995223  | 1.6631   | 1.5703   | -0.0828 | 0.688210 |
| N4bp2l2       | chr5:150608006-150665612  | 20.7932  | 20.3909  | -0.0282 | 0.796861 |
| Trbv29        | chr6:41271402-41271881    | 55.1638  | 60.3604  | 0.1299  | 0.761358 |
| Trbv30        | chr6:41281375-41281990    | 10.3259  | 11.9216  | 0.2073  | 0.689416 |
| Trbd2         | chr6:41542162-41542176    | 84.2782  | 103.4916 | 0.2963  | 0.460225 |
| Ppm1k         | chr6:57506501-57535426    | 9.6602   | 10.2148  | 0.0805  | 0.674367 |

|               |                          |          |          |         |          |
|---------------|--------------------------|----------|----------|---------|----------|
| Elmod3        | chr6:72565921-72598413   | 1.7587   | 1.9857   | 0.1752  | 0.683796 |
| Ccdc142       | chr6:83101616-83109939   | 9.3976   | 10.0578  | 0.0979  | 0.701067 |
| Gmcl1         | chr6:86691767-86733378   | 9.3806   | 9.9455   | 0.0844  | 0.506620 |
| Abtb1         | chr6:88835914-88841935   | 24.4206  | 25.7625  | 0.0772  | 0.569199 |
| Mttr14        | chr6:113237842-113281387 | 14.1513  | 14.9815  | 0.0822  | 0.501370 |
| Gm14335       | chr6:115638249-115639059 | 3.1964   | 2.6868   | -0.2506 | 0.717779 |
| Gm20404       | chr6:116107650-116127493 | 1.2611   | 0.9039   | -0.4804 | 0.600377 |
| Nrip2         | chr6:128399295-128408932 | 0.6163   | 0.7273   | 0.2388  | 0.515584 |
| Med21         | chr6:146642546-146650602 | 10.6149  | 11.5964  | 0.1276  | 0.743233 |
| Tmem238       | chr7:4784594-4789656     | 5.4615   | 6.0355   | 0.1442  | 0.559413 |
| Zik1          | chr7:10487228-10495394   | 2.4420   | 2.2651   | -0.1084 | 0.662722 |
| Lig1          | chr7:13277282-13311433   | 15.3838  | 14.7533  | -0.0604 | 0.825163 |
| Lgals7        | chr7:28863852-28866284   | 0.8204   | 1.1108   | 0.4372  | 0.534619 |
| Eif3k         | chr7:28971372-28981814   | 221.3978 | 233.4054 | 0.0762  | 0.743800 |
| Rbm42         | chr7:30640993-30650317   | 35.2164  | 34.0643  | -0.0480 | 0.820436 |
| Gm26762       | chr7:34224754-34230236   | 8.8330   | 9.3158   | 0.0768  | 0.486482 |
| Zfp719        | chr7:43579609-43593235   | 7.8490   | 8.3766   | 0.0939  | 0.696577 |
| Pold1         | chr7:44532745-44548849   | 15.7093  | 15.1805  | -0.0494 | 0.828964 |
| Hps5          | chr7:46760465-46796064   | 10.1025  | 10.6521  | 0.0764  | 0.590145 |
| Ldha          | chr7:46841474-46855627   | 129.1575 | 135.4035 | 0.0681  | 0.732412 |
| Eed           | chr7:89954655-89980983   | 39.8434  | 38.8117  | -0.0378 | 0.705580 |
| Gm26944       | chr7:92639738-92647442   | 16.6118  | 15.1279  | -0.1350 | 0.792756 |
| Gm26981       | chr7:92729839-92733748   | 7.1269   | 7.6451   | 0.1013  | 0.669239 |
| Acer3         | chr7:98213657-98321208   | 3.8849   | 4.2754   | 0.1382  | 0.746789 |
| Map6          | chr7:99267446-99337137   | 2.6912   | 2.9636   | 0.1391  | 0.789078 |
| Arfp2         | chr7:105634202-105640416 | 8.4224   | 8.1071   | -0.0551 | 0.712651 |
| Eif3f         | chr7:108934416-108942951 | 71.2055  | 69.4064  | -0.0369 | 0.840308 |
| AA474408      | chr7:110057986-110061325 | 2.4721   | 2.7861   | 0.1725  | 0.677980 |
| Ampd3         | chr7:110768205-110812405 | 2.1072   | 2.3078   | 0.1312  | 0.662117 |
| Lyrm1         | chr7:119895860-119916756 | 4.9648   | 4.5853   | -0.1147 | 0.222547 |
| NA            | chr7:127559385-127565266 | 9.2458   | 8.8386   | -0.0650 | 0.796067 |
| Stx4a         | chr7:127824293-127849019 | 20.0780  | 19.5387  | -0.0393 | 0.569751 |
| Nsmce4a       | chr7:130532522-130573118 | 36.7508  | 38.9506  | 0.0839  | 0.716144 |
| Insr          | chr8:3150921-3279617     | 6.6860   | 6.4465   | -0.0526 | 0.781253 |
| Irs2          | chr8:10986979-11008458   | 3.9694   | 3.6726   | -0.1121 | 0.794375 |
| Tm2d2         | chr8:25017210-25023259   | 12.0752  | 13.3143  | 0.1409  | 0.698986 |
| Ppapdc1b      | chr8:25720060-25724887   | 7.6171   | 8.2705   | 0.1187  | 0.699729 |
| Lsm1          | chr8:25785590-25803975   | 11.9467  | 12.8963  | 0.1103  | 0.713977 |
| Star          | chr8:25808473-25814723   | 3.6599   | 3.3935   | -0.1090 | 0.676014 |
| B230317F23Rik | chr8:60983436-60985908   | 0.7563   | 0.6289   | -0.2661 | 0.664336 |
| Gatad2a       | chr8:69907068-69996379   | 22.9920  | 24.0621  | 0.0656  | 0.588247 |
| Cope          | chr8:70302517-70312993   | 23.4949  | 24.7316  | 0.0740  | 0.637708 |
| Rab3a         | chr8:70754678-70758677   | 4.5172   | 4.1910   | -0.1082 | 0.684529 |
| Slc27a1       | chr8:71568926-71586708   | 2.6629   | 2.9308   | 0.1383  | 0.480291 |
| Pgls          | chr8:71592175-71601092   | 11.8758  | 12.6823  | 0.0948  | 0.746251 |
| Tmem184c      | chr8:77595981-77610698   | 14.8732  | 15.7564  | 0.0832  | 0.611081 |
| 4921524J17Rik | chr8:85408758-85432841   | 8.0101   | 8.7489   | 0.1273  | 0.676621 |
| Katnb1        | chr8:95081200-95099874   | 8.4086   | 8.0515   | -0.0626 | 0.752904 |
| Gm5914        | chr8:105624335-105637485 | 10.5178  | 11.9002  | 0.1782  | 0.622840 |
| Pard6a        | chr8:105701153-105703493 | 2.8859   | 3.3786   | 0.2274  | 0.670332 |
| Edc4          | chr8:105880880-105894908 | 22.9158  | 22.3019  | -0.0392 | 0.807858 |
| Terf2ip       | chr8:112011358-112020528 | 9.8704   | 10.5567  | 0.0970  | 0.702941 |
| Gm26733       | chr9:20432759-20563282   | 17.5735  | 16.6255  | -0.0800 | 0.820620 |
| Ccdc84        | chr9:44410159-44418003   | 19.6988  | 21.1286  | 0.1011  | 0.627747 |
| Ift46         | chr9:44767907-44792714   | 4.5334   | 4.9143   | 0.1164  | 0.766780 |
| Sidt2         | chr9:45937856-45955247   | 49.5036  | 48.6756  | -0.0243 | 0.797097 |
| NA            | chr9:45954100-45955998   | 7.3548   | 8.1375   | 0.1459  | 0.708729 |
| Timm8b        | chr9:50603900-50605320   | 51.8573  | 56.8208  | 0.1319  | 0.797707 |
| Arhgap20os    | chr9:51832813-51875886   | 0.7970   | 0.6274   | -0.3452 | 0.703473 |
| Pstpip1       | chr9:56089961-56128888   | 42.6134  | 41.6174  | -0.0341 | 0.809560 |
| Phip          | chr9:82866158-82975489   | 39.8166  | 38.9568  | -0.0315 | 0.827195 |
| Ibtk          | chr9:85687360-85749334   | 20.8328  | 21.8303  | 0.0675  | 0.653772 |
| Slc35g2       | chr9:100552192-100571085 | 1.5396   | 1.2404   | -0.3117 | 0.660091 |
| Nphp3         | chr9:104002543-104043730 | 0.5549   | 0.4738   | -0.2278 | 0.788903 |
| Mon1a         | chr9:107888128-107903125 | 10.2830  | 9.6375   | -0.0935 | 0.786789 |
| Qars          | chr9:108508004-108515941 | 25.1757  | 26.2326  | 0.0593  | 0.455908 |
| Wdr6          | chr9:108572312-108578670 | 32.1338  | 31.3705  | -0.0347 | 0.795913 |
| Ptpn23        | chr9:110385088-110408210 | 2.8507   | 3.1611   | 0.1491  | 0.748411 |
| Ctnnb1        | chr9:120929215-120960507 | 88.2432  | 86.9362  | -0.0215 | 0.708390 |
| Gata1         | chrX:7959259-7978071     | 5.8928   | 5.4871   | -0.1029 | 0.735140 |
| Usp9x         | chrX:13071497-13173328   | 31.9387  | 33.2212  | 0.0568  | 0.644227 |

|               |                           |          |          |         |          |
|---------------|---------------------------|----------|----------|---------|----------|
| Fundc1        | chrX:17556563-17572325    | 11.6834  | 12.4699  | 0.0940  | 0.585751 |
| Zbtb33        | chrX:38189792-38197046    | 4.7828   | 5.1072   | 0.0947  | 0.471960 |
| Mcts1         | chrX:38600577-38613426    | 25.0836  | 23.9971  | -0.0639 | 0.794426 |
| Mmgt1         | chrX:56585511-56598069    | 10.4223  | 10.0919  | -0.0465 | 0.759990 |
| L1cam         | chrX:73853777-73896105    | 5.8902   | 5.6375   | -0.0633 | 0.780544 |
| Gm14798       | chrX:94028853-94099304    | 10.2252  | 9.5539   | -0.0980 | 0.723633 |
| Magt1         | chrX:105968083-106011906  | 22.0228  | 23.2244  | 0.0766  | 0.733648 |
| Atp7a         | chrX:106027275-106124926  | 4.0057   | 3.8442   | -0.0594 | 0.761635 |
| Timm8a1       | chrX:134537255-134541865  | 0.6658   | 0.5026   | -0.4056 | 0.607705 |
| Gm24523       | chr15:34440790-34440922   | 28.8386  | 34.1806  | 0.2452  | 0.756465 |
| Nsmce2        | chr15:59374197-59601683   | 7.6438   | 8.2258   | 0.1059  | 0.765080 |
| Gm2895        | chr15:66969322-67013039   | 0.1409   | 0.2113   | 0.5853  | 0.655515 |
| Dennd3        | chr15:73512559-73572242   | 0.7402   | 0.6552   | -0.1761 | 0.709122 |
| Il2rb         | chr15:78480552-78495066   | 317.3624 | 311.3578 | -0.0276 | 0.851032 |
| NA            | chr15:78913918-78919517   | 8.1715   | 7.7760   | -0.0716 | 0.572040 |
| NA            | chr15:81857673-81858796   | 10.2967  | 9.3698   | -0.1361 | 0.787336 |
| Xrcc6         | chr15:81987834-82040085   | 15.0627  | 14.4280  | -0.0621 | 0.816430 |
| Desi1         | chr15:81992522-82033862   | 5.7423   | 5.3769   | -0.0949 | 0.800649 |
| Cenpm         | chr15:82233778-82244747   | 5.8141   | 6.5424   | 0.1703  | 0.739444 |
| Cdpf1         | chr15:85806971-85811697   | 13.0582  | 12.2193  | -0.0958 | 0.728287 |
| Dip2b         | chr15:100038663-100219473 | 17.9146  | 17.4550  | -0.0375 | 0.850399 |
| Calcoco1      | chr15:102706778-102722178 | 9.3291   | 8.9910   | -0.0533 | 0.737444 |
| Fam208a       | chr14:27428846-27483552   | 40.6753  | 39.5473  | -0.0406 | 0.854248 |
| Capn7         | chr14:31336637-31371986   | 33.0357  | 34.5029  | 0.0627  | 0.621252 |
| Traj4         | chr14:54216290-54216353   | 43.6181  | 50.9311  | 0.2236  | 0.621480 |
| Traj2         | chr14:54217835-54217901   | 80.8023  | 90.7750  | 0.1679  | 0.605304 |
| Zmym5         | chr14:56790584-56811716   | 12.4169  | 13.1765  | 0.0857  | 0.749658 |
| Gm27010       | chr14:61625925-61627337   | 5.9521   | 5.2546   | -0.1798 | 0.692952 |
| 4931440J10Rik | chr14:62760500-62830126   | 1.7485   | 2.1632   | 0.3071  | 0.616348 |
| Kctd9         | chr14:67715936-67742310   | 5.1165   | 5.4565   | 0.0928  | 0.641924 |
| Gm17233       | chr14:73173819-73187321   | 7.9561   | 8.9717   | 0.1733  | 0.647271 |
| Gm17066       | chr14:105109389-105114676 | 19.6148  | 18.4785  | -0.0861 | 0.823984 |
| Tgds          | chr14:118111910-118132765 | 8.4867   | 8.0456   | -0.0770 | 0.640133 |
| Ezr           | chr17:6738040-6782784     | 141.0346 | 138.9320 | -0.0217 | 0.827259 |
| 1700010I14Rik | chr17:8988332-9008319     | 3.1321   | 2.8735   | -0.1243 | 0.563340 |
| Zfp97         | chr17:17121414-17146831   | 2.2315   | 2.4979   | 0.1627  | 0.678818 |
| 9530082P21Rik | chr17:23743233-23754065   | 3.8920   | 4.2219   | 0.1174  | 0.673152 |
| Kctd5         | chr17:24047733-24073485   | 12.6478  | 12.0963  | -0.0643 | 0.770837 |
| Abhd16a       | chr17:35089262-35102987   | 12.2417  | 11.7060  | -0.0645 | 0.784935 |
| A930015D03Rik | chr17:35994452-36038435   | 9.0692   | 9.9286   | 0.1306  | 0.588230 |
| Gm9574        | chr17:36137187-36139105   | 3.2207   | 2.7068   | -0.2508 | 0.683223 |
| Rnf39         | chr17:36942917-36947986   | 1.8895   | 1.6456   | -0.1994 | 0.740234 |
| Olf756-ps1    | chr17:37285141-37286069   | 0.6701   | 0.9736   | 0.5389  | 0.580719 |
| Clpp          | chr17:56990263-56996371   | 23.6502  | 25.1632  | 0.0895  | 0.583606 |
| Tnfsf14       | chr17:57189491-57194189   | 9.4811   | 9.0173   | -0.0723 | 0.630270 |
| Foxn2         | chr17:88440710-88490533   | 18.5222  | 18.1192  | -0.0317 | 0.759972 |
| Prodh         | chr16:18060356-18090203   | 3.0086   | 2.8111   | -0.0980 | 0.561465 |
| Gm24572       | chr16:18284549-18284637   | 18.7230  | 14.4116  | -0.3776 | 0.689536 |
| Snord2        | chr16:23108952-23109021   | 79.8912  | 71.4539  | -0.1610 | 0.726520 |
| Gm26447       | chr16:23111300-23111429   | 87.1249  | 97.7817  | 0.1665  | 0.819575 |
| Bcl6          | chr16:23965051-23988852   | 6.1811   | 5.9228   | -0.0616 | 0.788800 |
| Tnk2          | chr16:32643873-32683493   | 16.8579  | 16.2649  | -0.0517 | 0.826976 |
| Cd80          | chr16:38458932-38486933   | 6.8849   | 7.6015   | 0.1428  | 0.673476 |
| Nfkbiz        | chr16:55811374-55838899   | 36.5960  | 35.8487  | -0.0298 | 0.803782 |
| Nxpe3         | chr16:55839952-55895279   | 8.4805   | 8.9481   | 0.0774  | 0.638308 |
| Ets2          | chr16:95702074-95721051   | 10.2080  | 9.8363   | -0.0535 | 0.751680 |
| B230307C23Rik | chr16:97997322-98010000   | 9.2311   | 8.5805   | -0.1054 | 0.762162 |
| Ndufs8        | chr19:3908869-3912717     | 59.7640  | 63.2732  | 0.0823  | 0.713838 |
| Mrpl11        | chr19:4962305-4966995     | 8.0160   | 8.7076   | 0.1194  | 0.710675 |
| Pygm          | chr19:6384398-6398459     | 1.8983   | 1.7013   | -0.1580 | 0.762017 |
| Gpr137        | chr19:6938068-6942450     | 5.8296   | 5.4527   | -0.0964 | 0.745108 |
| Gm22744       | chr19:8725091-8725156     | 86.2538  | 77.2796  | -0.1585 | 0.770716 |
| Mrpl16        | chr19:11770414-11774944   | 17.3348  | 18.9039  | 0.1250  | 0.728347 |
| Klf9          | chr19:23141225-23166911   | 2.9547   | 3.3128   | 0.1650  | 0.763208 |
| Gm6563        | chr19:23675843-23676712   | 2.4198   | 1.9003   | -0.3486 | 0.699519 |
| Rcl1          | chr19:29101374-29143843   | 22.7564  | 21.6413  | -0.0725 | 0.821770 |
| Cd274         | chr19:29367454-29388095   | 21.5786  | 22.6701  | 0.0712  | 0.642590 |
| Ermp1         | chr19:29608213-29648415   | 12.8810  | 13.4253  | 0.0597  | 0.509774 |
| Slc25a28      | chr19:43663821-43674881   | 19.4508  | 20.6586  | 0.0869  | 0.508691 |
| Sema4g        | chr19:44989100-45003397   | 0.6935   | 0.6098   | -0.1857 | 0.642176 |
| Mrpl43        | chr19:45005013-45006442   | 31.4188  | 33.3007  | 0.0839  | 0.647424 |



|               |                          |          |          |         |          |
|---------------|--------------------------|----------|----------|---------|----------|
| Sufu          | chr19:46396895-46488804  | 3.3874   | 3.2141   | -0.0758 | 0.768597 |
| Lypla1        | chr1:4807787-4886770     | 14.9495  | 15.7769  | 0.0777  | 0.699318 |
| 1700034P13Rik | chr1:9747647-9791922     | 5.4994   | 5.1676   | -0.0898 | 0.633652 |
| Ogfr1         | chr1:23366423-23383175   | 0.7198   | 0.6323   | -0.1869 | 0.701786 |
| Lmbrd1        | chr1:24678543-24766299   | 12.9034  | 12.3980  | -0.0576 | 0.837925 |
| Asnsd1        | chr1:53325506-53352752   | 20.3329  | 21.4978  | 0.0804  | 0.711459 |
| Hspe1         | chr1:55088131-55091307   | 21.7615  | 23.7548  | 0.1264  | 0.801597 |
| 1700066M21Rik | chr1:57377619-57385423   | 6.2752   | 6.7782   | 0.1112  | 0.666703 |
| Als2cr12      | chr1:58658116-58695989   | 1.0134   | 0.8374   | -0.2752 | 0.661614 |
| Eef1b2        | chr1:63176824-63180486   | 149.4935 | 158.2448 | 0.0821  | 0.783946 |
| Plcd4         | chr1:74542887-74567794   | 1.3883   | 1.2308   | -0.1737 | 0.799056 |
| G530012D18Rik | chr1:85575675-85577295   | 35.2730  | 33.2501  | -0.0852 | 0.650714 |
| Gm4258        | chr1:137898594-138000384 | 1.5394   | 1.9115   | 0.3124  | 0.755247 |
| 2310009B15Rik | chr1:138851978-138856854 | 5.6404   | 4.8513   | -0.2174 | 0.736414 |
| Teddm2        | chr1:153849541-153900208 | 1.8378   | 2.1216   | 0.2071  | 0.648252 |
| Gm2000        | chr1:156366039-156366484 | 5.4339   | 4.5987   | -0.2408 | 0.658984 |
| Gm26224       | chr1:161035393-161035473 | 139.4357 | 129.1129 | -0.1110 | 0.762922 |
| Mettl18       | chr1:163994888-163997243 | 8.9428   | 8.0808   | -0.1462 | 0.782431 |
| Blzf1         | chr1:164289799-164307489 | 4.8022   | 5.1664   | 0.1055  | 0.650220 |
| Atf6          | chr1:170704673-170867771 | 7.2510   | 7.6464   | 0.0766  | 0.693575 |
| Pex19         | chr1:172126754-172136493 | 13.2927  | 14.0138  | 0.0762  | 0.625125 |
| Wdr26         | chr1:181173227-181211552 | 37.2034  | 38.6380  | 0.0546  | 0.403160 |
| G0s2          | chr1:193272160-193273188 | 1.6160   | 1.1828   | -0.4502 | 0.742874 |
| Mtpap         | chr18:4375591-4397330    | 21.4916  | 22.6141  | 0.0735  | 0.510545 |
| Rab18         | chr18:6765204-6790231    | 14.1403  | 15.0170  | 0.0868  | 0.568686 |
| Gm2531        | chr18:10145452-10145965  | 7.1224   | 8.2111   | 0.2052  | 0.663415 |
| Sft2d3        | chr18:31909093-31911903  | 5.0286   | 5.4525   | 0.1168  | 0.488227 |
| Brd8          | chr18:34598614-34624601  | 20.4451  | 20.0169  | -0.0305 | 0.785775 |
| Gm26742       | chr18:54981434-54987689  | 0.5862   | 0.4790   | -0.2915 | 0.762043 |
| Lmnb1         | chr18:56707812-56753424  | 31.9122  | 33.7346  | 0.0801  | 0.701668 |
| Dym           | chr18:75018771-75286966  | 9.4709   | 8.9321   | -0.0845 | 0.775091 |
| Timm21        | chr18:84947293-84951524  | 24.3841  | 23.2407  | -0.0693 | 0.789901 |
| Tmx3          | chr18:90510153-90543267  | 26.3373  | 27.5963  | 0.0674  | 0.657212 |
| Sephs1        | chr2:4881563-4910557     | 11.1844  | 10.8557  | -0.0430 | 0.752609 |
| Gm13357       | chr2:23019130-23019667   | 2.6201   | 2.0189   | -0.3761 | 0.513194 |
| Il1rn         | chr2:24336852-24351494   | 0.8252   | 0.7160   | -0.2047 | 0.644810 |
| Lcn4          | chr2:26667673-26671282   | 2.2689   | 1.7966   | -0.3367 | 0.626175 |
| Rpsa-ps9      | chr2:28477165-28478050   | 2.1701   | 2.5772   | 0.2481  | 0.514579 |
| Dennd1a       | chr2:37798990-38287390   | 4.4939   | 4.8734   | 0.1170  | 0.740075 |
| A930012O16Rik | chr2:57236226-57238508   | 0.4945   | 0.7001   | 0.5018  | 0.619061 |
| Cytip         | chr2:58129136-58195532   | 106.2229 | 104.3077 | -0.0262 | 0.837611 |
| Ssb           | chr2:69861561-69871846   | 144.2889 | 141.1362 | -0.0319 | 0.848783 |
| Atp5g3        | chr2:73908446-73911326   | 41.0580  | 43.4024  | 0.0801  | 0.703415 |
| Lnp           | chr2:74520290-74579435   | 3.7669   | 3.5953   | -0.0673 | 0.790299 |
| Ttc30b        | chr2:75935862-75938462   | 1.4028   | 1.6227   | 0.2101  | 0.577583 |
| Zc3h15        | chr2:83644434-83664622   | 35.7469  | 34.4601  | -0.0529 | 0.833418 |
| Ilgav         | chr2:83724396-83806916   | 16.0772  | 15.6814  | -0.0360 | 0.804229 |
| Hsd17b12      | chr2:94032688-94157964   | 19.7564  | 19.0070  | -0.0558 | 0.810757 |
| Api5          | chr2:94411681-94438136   | 41.7190  | 40.5493  | -0.0410 | 0.823038 |
| Prr5l         | chr2:101714284-101883027 | 0.7656   | 0.6291   | -0.2834 | 0.693930 |
| Apip          | chr2:103073674-103092644 | 10.3991  | 11.4058  | 0.1333  | 0.643778 |
| Stard9        | chr2:120629125-120731897 | 1.3108   | 1.2423   | -0.0774 | 0.780994 |
| Trpm7         | chr2:126791564-126876230 | 22.2140  | 21.7410  | -0.0311 | 0.784636 |
| Gm10130       | chr2:150323701-150363071 | 20.7361  | 23.3606  | 0.1719  | 0.688979 |
| Angpt4        | chr2:151911209-151945337 | 0.5800   | 0.4159   | -0.4799 | 0.686317 |
| Comm7         | chr2:153616932-153632781 | 9.9637   | 9.6485   | -0.0464 | 0.754908 |
| Gm14494       | chr2:153826052-153826834 | 2.8959   | 2.3165   | -0.3221 | 0.773952 |
| Cbfa2t2       | chr2:154436480-154539356 | 4.1302   | 3.9581   | -0.0614 | 0.788880 |
| Itch          | chr2:155133508-155226855 | 16.6129  | 17.3114  | 0.0594  | 0.463786 |
| Ppp1r16b      | chr2:158665397-158766334 | 22.6725  | 23.7762  | 0.0686  | 0.674010 |
| Zmynd8        | chr2:165784151-165899016 | 10.4413  | 10.1880  | -0.0354 | 0.802773 |
| Dnajc5        | chr2:181520484-181555133 | 33.5509  | 32.9692  | -0.0252 | 0.777300 |
| Car13         | chr3:14641726-14663002   | 0.3942   | 0.2880   | -0.4527 | 0.645034 |
| Ythdf3        | chr3:16183182-16217035   | 40.3862  | 39.5041  | -0.0319 | 0.822206 |
| Armc1         | chr3:19132145-19163065   | 12.0760  | 12.8771  | 0.0927  | 0.648540 |
| Ndufb5        | chr3:32736989-32751566   | 30.5814  | 32.4610  | 0.0861  | 0.748952 |
| Rsrc1         | chr3:66981389-67358396   | 4.1534   | 4.3938   | 0.0812  | 0.683445 |
| Lxn           | chr3:67457997-67463926   | 8.9732   | 8.3100   | -0.1108 | 0.777461 |
| Gucy1a3       | chr3:82092427-82145877   | 5.4090   | 5.7803   | 0.0958  | 0.568054 |
| Glt28d2       | chr3:85801046-85887518   | 1.2422   | 1.1280   | -0.1392 | 0.688638 |
| Ilf2          | chr3:90476200-90488379   | 55.8007  | 54.4544  | -0.0352 | 0.767663 |

|               |                           |         |         |         |          |
|---------------|---------------------------|---------|---------|---------|----------|
| Vps45         | chr3:95999831-96058466    | 6.4015  | 6.8655  | 0.1009  | 0.691524 |
| Fmo5          | chr3:97628803-97655282    | 1.1774  | 1.3010  | 0.1440  | 0.400741 |
| Hadh          | chr3:131233418-131272101  | 10.6125 | 11.2171 | 0.0799  | 0.692606 |
| Ccne2         | chr4:11191350-11204779    | 9.9990  | 10.7267 | 0.1013  | 0.734676 |
| Fam219a       | chr4:41517690-41569538    | 1.6182  | 1.4482  | -0.1601 | 0.751626 |
| Rpp25l        | chr4:41712032-41713534    | 18.3437 | 17.0021 | -0.1096 | 0.789834 |
| Tex10         | chr4:48430857-48473459    | 19.1136 | 20.1179 | 0.1919  | 0.633435 |
| Hsd12         | chr4:59581562-59618689    | 13.3518 | 14.4782 | 0.1168  | 0.758258 |
| Slc31a2       | chr4:62262561-62298411    | 6.7134  | 7.3232  | 0.1254  | 0.601282 |
| Fkbp15        | chr4:62300341-62360548    | 17.8951 | 17.5434 | -0.0286 | 0.788808 |
| Wdr31         | chr4:62448652-62470896    | 0.2205  | 0.1587  | -0.4746 | 0.685051 |
| Pde4b         | chr4:102087542-102607259  | 8.8103  | 8.6148  | -0.0324 | 0.591979 |
| Gm17354       | chr4:108633842-108637441  | 5.4390  | 5.9573  | 0.1313  | 0.681222 |
| Eps15         | chr4:109280267-109387817  | 20.5175 | 20.0751 | -0.0314 | 0.788058 |
| Tctex1d4      | chr4:117126793-117128738  | 5.1860  | 4.6725  | -0.1504 | 0.646106 |
| Map7d1        | chr4:126232166-126256343  | 11.9487 | 12.7136 | 0.0895  | 0.713848 |
| Gmeb1         | chr4:132221024-132261602  | 4.8760  | 4.6874  | -0.0569 | 0.736071 |
| Tmem57        | chr4:134802758-134853345  | 8.0037  | 7.6982  | -0.0561 | 0.771196 |
| Luzp1         | chr4:136469760-136554780  | 2.2340  | 2.4382  | 0.1262  | 0.706008 |
| Ddost         | chr4:138304729-138312628  | 75.2651 | 73.1235 | -0.0416 | 0.832256 |
| Szrd1         | chr4:141113000-141139775  | 39.7914 | 42.1281 | 0.0823  | 0.752964 |
| Hffa          | chr4:149104145-149120647  | 8.7237  | 8.3965  | -0.0552 | 0.700574 |
| H6pd          | chr4:149979474-150009023  | 9.7352  | 9.3364  | -0.0603 | 0.806794 |
| Thap3         | chr4:151982638-151988997  | 17.6351 | 18.8212 | 0.0939  | 0.640558 |
| Gm9770        | chr10:130412498-130413312 | 0.8010  | 1.0747  | 0.4241  | 0.528397 |
| Gm12229       | chr11:54746356-54746824   | 2.9470  | 3.9411  | 0.4193  | 0.757009 |
| Gm11712       | chr11:107386982-107388971 | 1.3965  | 2.1555  | 0.6262  | 0.683987 |
| Spata7        | chr12:98628156-98669815   | 0.1565  | 0.2259  | 0.5297  | 0.639769 |
| 4930486L24Rik | chr13:60842620-60864416   | 1.1803  | 1.4697  | 0.3164  | 0.661682 |
| D730045B01Rik | chr5:151368863-151369172  | 3.0559  | 3.8296  | 0.3256  | 0.517357 |
| NA            | chr6:116173633-116174494  | 0.9177  | 0.5960  | -0.6227 | 0.705359 |
| Klrd1         | chr6:129591781-129598775  | 0.9169  | 1.2767  | 0.4776  | 0.685039 |
| Kansl2-ps     | chr7:72672817-72674278    | 0.6790  | 0.5093  | -0.4148 | 0.673818 |
| Mboat4        | chr8:34115029-34125185    | 1.4455  | 1.1569  | -0.3213 | 0.725635 |
| Gm26664       | chr8:84665127-84669406    | 2.5610  | 3.2567  | 0.3467  | 0.619517 |
| Frmf7         | chrX:50895179-50942710    | 0.4875  | 0.3675  | -0.4080 | 0.683339 |
| Gm14780       | chrX:93527572-93530309    | 0.7313  | 0.5752  | -0.3463 | 0.749271 |
| Gm9670        | chrX:103506811-103507589  | 1.9787  | 1.5431  | -0.3587 | 0.701119 |
| Dnah12        | chr14:26693273-26891703   | 0.0790  | 0.0556  | -0.5076 | 0.747326 |
| Tmem253       | chr14:52016864-52019787   | 2.3867  | 1.9518  | -0.2902 | 0.729427 |
| Traj41        | chr14:54176270-54176325   | 42.3323 | 33.3618 | -0.3436 | 0.746997 |
| Serpine3      | chr14:62663666-62692243   | 0.7574  | 1.0171  | 0.4253  | 0.682851 |
| Gm16386       | chr17:22784797-22817741   | 2.1009  | 2.6193  | 0.3182  | 0.699684 |
| BC033916      | chr17:33905134-33906675   | 2.5871  | 3.3819  | 0.3865  | 0.760399 |
| Mettl4-ps1    | chr17:71526895-71556543   | 0.4922  | 0.3676  | -0.4214 | 0.706663 |
| Map3k13       | chr16:21891968-21931877   | 0.2088  | 0.2704  | 0.3726  | 0.709527 |
| Pik3ap1       | chr19:41274217-41385070   | 1.7513  | 2.1035  | 0.2644  | 0.735473 |
| Gm16244       | chr19:42779031-42781454   | 0.6719  | 0.8557  | 0.3489  | 0.608825 |
| Gm6776        | chr19:43280797-43281697   | 3.4202  | 4.0703  | 0.2511  | 0.713783 |
| Rapsn         | chr2:91035619-91045729    | 0.9648  | 1.2471  | 0.3702  | 0.662749 |
| Gm14010       | chr2:128423653-128424565  | 1.3132  | 1.9801  | 0.5925  | 0.656523 |
| Gm23650       | chr2:130277696-130277766  | 8.5412  | 13.0795 | 0.6148  | 0.701519 |
| Gm11743       | chr2:144756328-144758582  | 0.7780  | 1.0077  | 0.3731  | 0.680190 |
| Hbegf         | chr18:36504928-36515805   | 1.1032  | 0.8839  | -0.3198 | 0.735045 |
| Gm17119       | chr3:14564401-14564681    | 7.9839  | 10.0328 | 0.3296  | 0.670124 |
| 1700034I23Rik | chr3:40900199-40902501    | 0.2777  | 0.4064  | 0.5493  | 0.641348 |
| Larp1b        | chr3:41021938-41040234    | 0.7066  | 0.8884  | 0.3303  | 0.708163 |
| Tsacc         | chr3:88282756-88296999    | 1.4966  | 1.9757  | 0.4007  | 0.742913 |
| Gm16540       | chr3:90057258-90058380    | 1.4693  | 2.1399  | 0.5424  | 0.621034 |
| Gm12490       | chr3:101260916-101261476  | 2.9363  | 3.7452  | 0.3510  | 0.761175 |
| Dio3os        | chr12:110275383-110278068 | 0.7445  | 0.4770  | -0.6423 | 0.716438 |
| Gm23553       | chr13:9109304-9109599     | 4.5703  | 3.5158  | -0.3784 | 0.768588 |
| Zfp768        | chr7:127342796-127345314  | 0.4439  | 0.3069  | -0.5325 | 0.731076 |
| Gm16144       | chr9:69477028-69479598    | 0.9528  | 0.6668  | -0.5149 | 0.698015 |
| Gm2464        | chr3:13471905-13474596    | 0.3898  | 0.2741  | -0.5080 | 0.699290 |
| Gm12543       | chr4:59833676-59834219    | 1.3046  | 0.8382  | -0.6382 | 0.704611 |
| Zfp428        | chr7:24507005-24515682    | 0.7798  | 1.0043  | 0.3650  | 0.639071 |
| lct1          | chr11:115403751-115412674 | 12.1423 | 12.8229 | 0.0787  | 0.567136 |
| Tmem259       | chr10:79974947-79984330   | 29.7288 | 28.9719 | -0.0372 | 0.848150 |
| Rps15a-ps6    | chr11:6172643-6173036     | 2.3234  | 1.7530  | -0.4064 | 0.694962 |
| Slfm3         | chr11:83191329-83215154   | 8.9897  | 9.7630  | 0.1191  | 0.724925 |

|               |                           |         |          |         |          |
|---------------|---------------------------|---------|----------|---------|----------|
| Unk           | chr11:116030321-116061214 | 10.1944 | 9.7628   | -0.0624 | 0.848235 |
| Lpin1         | chr12:16535668-16589770   | 9.6202  | 9.3510   | -0.0410 | 0.720101 |
| Rps3a3        | chr13:108670579-108671440 | 1.3910  | 1.1250   | -0.3062 | 0.678046 |
| Pomp          | chr5:147860627-147875778  | 99.0341 | 105.3210 | 0.0888  | 0.763146 |
| Gm20512       | chr7:19715015-19721731    | 7.1544  | 8.2475   | 0.2051  | 0.736052 |
| Zfp74         | chr7:29930814-29954089    | 2.9579  | 2.7596   | -0.1001 | 0.816757 |
| Slc25a38      | chr9:120110373-120124504  | 8.2142  | 8.8311   | 0.1045  | 0.703738 |
| Abcb7         | chrX:104280656-104413856  | 19.3332 | 18.8334  | -0.0378 | 0.836789 |
| Mtdh          | chr15:34082693-34142386   | 17.5110 | 18.2545  | 0.0600  | 0.637778 |
| Uxs1          | chr1:43746965-43827800    | 4.1694  | 3.9592   | -0.0747 | 0.783775 |
| Usp37         | chr1:74435509-74544286    | 16.6340 | 16.1243  | -0.0449 | 0.838372 |
| Rin2          | chr2:145784733-145887616  | 3.5616  | 3.8805   | 0.1237  | 0.759775 |
| Trim45        | chr3:100922201-100936925  | 1.1924  | 1.1000   | -0.1163 | 0.672694 |
| Isy1          | chr6:87818446-87838759    | 49.3532 | 47.7258  | -0.0484 | 0.839649 |
| Nkiras1       | chr14:18271135-18283942   | 5.5631  | 5.3704   | -0.0509 | 0.663365 |
| Gm16278       | chr17:25919088-25935745   | 2.8533  | 3.2347   | 0.1810  | 0.665594 |
| 1110032F04Rik | chr3:68869585-68872163    | 14.2590 | 13.7857  | -0.0487 | 0.709592 |
| Fln           | chr11:59791407-59810016   | 12.9233 | 12.5274  | -0.0449 | 0.804501 |
| Zc2hc1c       | chr12:85288590-85299358   | 0.5289  | 0.4535   | -0.2222 | 0.713477 |
| Sspo          | chr6:48448228-48501250    | 0.7011  | 0.6462   | -0.1176 | 0.788305 |
| Maged2        | chrX:150806369-150814345  | 4.8130  | 5.2125   | 0.1150  | 0.720380 |
| Mcm3          | chr1:20802973-20820278    | 58.1869 | 60.4922  | 0.0561  | 0.547184 |
| Sema4c        | chr1:36548641-36558349    | 0.8777  | 0.7691   | -0.1905 | 0.772646 |
| Ddrgr1        | chr2:130653959-130664659  | 28.1416 | 27.4688  | -0.0349 | 0.535776 |
| Trp53tg5      | chr2:164470300-164473724  | 1.9332  | 1.5494   | -0.3193 | 0.769859 |
| Ranbp2        | chr10:58446851-58494155   | 76.4455 | 75.2230  | -0.0233 | 0.830722 |
| Kcnmb4os2     | chr10:116473162-116475319 | 0.8144  | 0.6737   | -0.2736 | 0.712708 |
| Maea          | chr5:33335571-33373294    | 37.1096 | 38.9109  | 0.0684  | 0.652046 |
| Trip6         | chr5:137309898-137314241  | 2.8207  | 2.5305   | -0.1566 | 0.693580 |
| Zan           | chr5:137378636-137477064  | 0.4499  | 0.3930   | -0.1951 | 0.821758 |
| Ap2a1         | chr7:44900372-44929496    | 17.4634 | 16.8552  | -0.0511 | 0.849933 |
| Klh125        | chr7:75848337-75874130    | 12.7079 | 13.4659  | 0.0836  | 0.692295 |
| Mroh1         | chr15:76380260-76453038   | 4.1415  | 3.9440   | -0.0705 | 0.876597 |
| Gpatch11      | chr17:78835515-78848299   | 10.4174 | 10.0950  | -0.0454 | 0.706537 |
| NA            | chr2:10047837-10049519    | 0.5832  | 0.7732   | 0.0668  | 0.655735 |
| Gm14049       | chr2:130987983-130988619  | 1.4218  | 1.0772   | -0.4004 | 0.674859 |
| Cep70         | chr9:99243441-99300401    | 6.6856  | 6.3332   | -0.0781 | 0.756042 |
| Kdm4b         | chr17:56326061-56402870   | 12.6534 | 12.2637  | -0.0451 | 0.790942 |
| Gm15765       | chr14:45211522-45212432   | 0.4888  | 0.7366   | 0.5916  | 0.672930 |
| Gm26908       | chr14:70205323-70217659   | 0.6519  | 0.5033   | -0.3731 | 0.670236 |
| Dhx58         | chr11:100694883-100704271 | 10.4569 | 11.2149  | 0.1010  | 0.745665 |
| Pak1ip1       | chr13:41001022-41013019   | 20.3466 | 21.3107  | 0.0668  | 0.588927 |
| Rbm34         | chr8:126947174-126971079  | 12.2851 | 11.8562  | -0.0513 | 0.799836 |
| Ppih          | chr4:119300009-119320546  | 6.1299  | 5.7257   | -0.0984 | 0.783631 |
| Cdkl3         | chr11:52004220-52089784   | 2.3141  | 2.5076   | 0.1159  | 0.616759 |
| Dvl2          | chr11:700050594-70012301  | 13.7899 | 13.4434  | -0.0367 | 0.818555 |
| Pik3cg        | chr12:32173472-32208659   | 13.5101 | 14.1699  | 0.0688  | 0.677226 |
| Trappc6b      | chr12:59043092-59061461   | 23.6354 | 22.6975  | -0.0584 | 0.763163 |
| Cdkal1        | chr13:29191745-29855674   | 3.6901  | 3.5725   | -0.0467 | 0.786576 |
| Trim24        | chr6:37870810-37966296    | 13.5078 | 13.1967  | -0.0336 | 0.825224 |
| A1854703      | chr6:48626763-48633689    | 0.4882  | 0.5989   | 0.2948  | 0.742174 |
| Vsig10l       | chr7:43463150-43471913    | 0.3455  | 0.4666   | 0.4333  | 0.726618 |
| 9330171B17Rik | chr7:79710370-79712357    | 1.2849  | 1.1045   | -0.2182 | 0.692628 |
| Zfp629        | chr7:127607030-127615797  | 0.6965  | 0.6295   | -0.1460 | 0.589175 |
| Pbx4          | chr8:69832623-69873163    | 2.4621  | 2.7729   | 0.1715  | 0.720905 |
| Rpl18a        | chr8:70894721-70897443    | 37.4163 | 40.0305  | 0.0974  | 0.768126 |
| Enkd1         | chr8:105703654-105707933  | 3.2619  | 3.7430   | 0.1985  | 0.688688 |
| Ccpg1os       | chr9:72979723-72985376    | 3.7590  | 3.2119   | -0.2269 | 0.718127 |
| Pigb          | chr9:73015695-73039699    | 4.4386  | 4.8392   | 0.1247  | 0.638587 |
| Map4          | chr9:109931457-110083947  | 7.7652  | 7.5753   | -0.0357 | 0.834524 |
| ltgb1bp2      | chrX:101449087-101453541  | 1.7075  | 1.4018   | -0.2846 | 0.747780 |
| Ttll1         | chr15:83483771-83510893   | 1.6125  | 1.4438   | -0.1594 | 0.755465 |
| Traj28        | chr14:54191660-54191725   | 91.4763 | 103.7032 | 0.1810  | 0.788348 |
| B4galt4       | chr16:38742263-38769049   | 1.6314  | 1.8314   | 0.1668  | 0.664793 |
| Gtdc1         | chr2:44564411-44927657    | 4.5316  | 4.3431   | -0.0613 | 0.784588 |
| Metap1d       | chr2:71453275-71525194    | 8.2583  | 7.9304   | -0.0585 | 0.785316 |
| Fnip2         | chr3:79455970-79567796    | 0.8156  | 0.7525   | -0.1163 | 0.677986 |
| Gm12977       | chr4:133871829-133876533  | 21.6239 | 20.7085  | -0.0624 | 0.747365 |
| Pex14         | chr4:148960534-149099876  | 4.8370  | 4.6136   | -0.0682 | 0.827102 |
| Nphp4         | chr4:152476705-152563183  | 0.3772  | 0.3130   | -0.2692 | 0.685681 |
| Traj42        | chr14:54175772-54175836   | 24.5632 | 31.0019  | 0.3359  | 0.595227 |

|               |                           |         |         |         |          |
|---------------|---------------------------|---------|---------|---------|----------|
| 1700048M11Rik | chr16:92308715-92312466   | 2.1115  | 2.7831  | 0.3985  | 0.652427 |
| Gm12739       | chr4:108484170-108484552  | 3.8923  | 3.0626  | -0.3459 | 0.775310 |
| Gm12266       | chr11:60343244-60344206   | 1.7376  | 2.2833  | 0.3940  | 0.769209 |
| Ccdc42b       | chr5:120628334-120634235  | 1.0603  | 0.8104  | -0.3877 | 0.766646 |
| Arc           | chr15:74669082-74672570   | 3.4528  | 3.7748  | 0.1286  | 0.656953 |
| 2610524H06Rik | chr5:114821934-114823468  | 18.9161 | 17.9237 | -0.0777 | 0.734001 |
| Ube2l3        | chr16:17152012-17202649   | 11.3348 | 11.0023 | -0.0430 | 0.799510 |
| Sssca1        | chr19:5728087-5731732     | 17.8197 | 18.8641 | 0.0822  | 0.732422 |
| Gphn          | chr12:78226654-78684767   | 9.6292  | 9.2858  | -0.0524 | 0.734341 |
| Emp1          | chr6:135362930-135383173  | 3.6121  | 4.0419  | 0.1622  | 0.802307 |
| Grpel1        | chr5:36464997-36474080    | 19.5029 | 18.8477 | -0.0493 | 0.826245 |
| Ccdc25        | chr14:65837301-65866604   | 21.0538 | 20.3641 | -0.0481 | 0.784213 |
| Irf6          | chr1:193153111-193172042  | 5.7318  | 6.1045  | 0.0909  | 0.726605 |
| Crsl1         | chr2:132846665-132866785  | 11.6669 | 11.1910 | -0.0601 | 0.711159 |
| Pou2f2        | chr7:25091908-25159922    | 8.0965  | 7.6479  | -0.0822 | 0.825531 |
| Ergic3        | chr2:156008044-156018279  | 20.7542 | 21.9666 | 0.0819  | 0.731214 |
| Man1c1        | chr4:134561689-134704290  | 1.4856  | 1.3713  | -0.1155 | 0.754021 |
| Gm10684       | chr9:45107175-45135606    | 0.7976  | 1.0087  | 0.3389  | 0.653407 |
| D730003115Rik | chr1:191224473-191225686  | 5.3780  | 4.5798  | -0.2318 | 0.748937 |
| Gm24411       | chr2:158356423-158356554  | 3.7491  | 5.4991  | 0.5527  | 0.673660 |
| Cyp4f18       | chr8:71988481-72009626    | 0.2645  | 0.3956  | 0.5810  | 0.737550 |
| Dusp10        | chr1:184013301-184075636  | 16.1387 | 15.6468 | -0.0447 | 0.767720 |
| Zfp217        | chr2:170108642-170148103  | 26.2340 | 25.6385 | -0.0331 | 0.852194 |
| Pradc1        | chr6:85446809-85451970    | 8.3086  | 7.7773  | -0.0953 | 0.807202 |
| Gins4         | chr8:23226609-23237668    | 29.9343 | 31.7141 | 0.0833  | 0.685997 |
| Msh2          | chr17:87672329-87723713   | 16.0523 | 16.8923 | 0.0736  | 0.726168 |
| Rap2b         | chr3:61364506-61368703    | 10.2165 | 9.8229  | -0.0567 | 0.799235 |
| Snord60       | chr17:24528475-24528553   | 12.8665 | 18.0916 | 0.4917  | 0.763890 |
| Mynn          | chr3:30602086-30618492    | 13.5136 | 14.2587 | 0.0774  | 0.699245 |
| 4632428N05Rik | chr10:60346850-60372684   | 89.3131 | 92.9903 | 0.0582  | 0.712692 |
| Cand2         | chr6:115774537-115804893  | 3.3579  | 3.6122  | 0.1053  | 0.663082 |
| Iffo1         | chr6:125145240-125161782  | 7.3807  | 7.1011  | -0.0557 | 0.832486 |
| Tnt1          | chr7:4504569-4516382      | 1.7364  | 1.5568  | -0.1575 | 0.711347 |
| Edrf1         | chr7:133637542-133672971  | 15.6283 | 16.3828 | 0.0680  | 0.686636 |
| Syce2         | chr8:84872110-84888221    | 3.3460  | 3.8051  | 0.1855  | 0.727810 |
| Pla2g15       | chr8:106150398-106164713  | 3.2791  | 3.5960  | 0.1331  | 0.681458 |
| Hyls1         | chr9:35560819-35570103    | 17.0269 | 17.7725 | 0.0618  | 0.579913 |
| Fgf16         | chrX:105764278-105774939  | 1.5484  | 1.8099  | 0.2251  | 0.702013 |
| Bap1          | chr14:31251488-31259929   | 26.7003 | 27.9441 | 0.0657  | 0.669101 |
| Tmem204       | chr17:25057701-25081181   | 0.7262  | 0.8888  | 0.2915  | 0.741168 |
| Wdr90         | chr17:25844770-25861501   | 3.5152  | 3.3612  | -0.0646 | 0.815178 |
| Gm8186        | chr17:26098871-26099257   | 2.9563  | 2.2212  | -0.4125 | 0.724838 |
| Gm17080       | chr17:45586119-45588377   | 30.9186 | 29.7620 | -0.0550 | 0.705303 |
| Tiam1         | chr16:89787110-89980080   | 31.5926 | 33.2796 | 0.0750  | 0.792140 |
| Tctn3         | chr19:40596445-40612233   | 4.3033  | 4.0624  | -0.0831 | 0.708172 |
| Rpe           | chr1:66700830-66719805    | 22.6328 | 22.0466 | -0.0379 | 0.797031 |
| Ik            | chr18:36744655-36757639   | 73.0793 | 71.6773 | -0.0279 | 0.823767 |
| Gabpb2        | chr3:95181765-95217916    | 23.3196 | 24.1380 | 0.0498  | 0.501805 |
| Dynl1-ps1     | chr6:135349087-135349780  | 1.0477  | 0.7138  | -0.5537 | 0.738035 |
| Gm15976       | chr16:91924437-91928635   | 4.7029  | 3.8375  | -0.2934 | 0.712875 |
| Gm973         | chr1:59516263-59634508    | 0.4013  | 0.3072  | -0.3852 | 0.789449 |
| Hcfc2         | chr10:82696159-82742428   | 9.7649  | 9.4472  | -0.0477 | 0.834308 |
| Gm6483        | chr8:19682267-19698275    | 1.6024  | 1.4852  | -0.1096 | 0.753698 |
| Tpp2          | chr1:43934001-44002999    | 65.8737 | 64.8199 | -0.0233 | 0.810001 |
| Eya2          | chr2:165595031-165771727  | 2.4928  | 2.7858  | 0.1603  | 0.730815 |
| Snora24       | chr3:123507936-123508066  | 28.5971 | 32.2261 | 0.1724  | 0.485765 |
| Kcnh3         | chr15:99224975-99242817   | 0.2027  | 0.2846  | 0.4895  | 0.679656 |
| Rnf135        | chr11:80183850-80199757   | 5.9847  | 6.4834  | 0.1155  | 0.704203 |
| Tcrg-C2       | chr13:19305059-19307551   | 5.7811  | 6.7137  | 0.2158  | 0.785079 |
| A130010J15Rik | chr1:193168048-193177832  | 17.1406 | 16.6315 | -0.0435 | 0.817168 |
| Erdr1         | chrY:90784737-90816464    | 4.7127  | 5.3702  | 0.1884  | 0.767925 |
| Gm11131       | chr17:35377020-35380292   | 37.2629 | 39.2096 | 0.0735  | 0.735156 |
| Trmt11        | chr10:30534224-30600749   | 13.2671 | 12.7162 | -0.0612 | 0.817094 |
| Usp15         | chr10:123113243-123196935 | 46.2591 | 45.3381 | -0.0290 | 0.814921 |
| Pnpt1         | chr11:29130743-29161828   | 26.7927 | 28.1810 | 0.0729  | 0.736188 |
| Dhrs7b        | chr11:60830630-60860195   | 5.1753  | 4.8502  | -0.0936 | 0.825920 |
| Derl2         | chr11:71007163-71019841   | 10.2467 | 10.0196 | -0.0323 | 0.772034 |
| Lasp1         | chr11:97798999-97838764   | 28.2352 | 27.7061 | -0.0273 | 0.834330 |
| Psmc3ip       | chr11:101091822-101095436 | 9.4477  | 10.1689 | 0.1061  | 0.668581 |
| Mapt          | chr11:104231389-104332090 | 0.3134  | 0.2653  | -0.2406 | 0.797143 |
| Gm20069       | chr12:102612679-102618516 | 8.1736  | 7.2678  | -0.1694 | 0.758623 |

|               |                           |           |           |         |          |
|---------------|---------------------------|-----------|-----------|---------|----------|
| Gm16084       | chr12:107147163-107160207 | 1.4573    | 1.0959    | -0.4112 | 0.708092 |
| Siva1         | chr12:112644827-112649152 | 9.0810    | 10.2964   | 0.1812  | 0.747689 |
| Zscan26       | chr13:21442174-21453730   | 37.5982   | 39.3491   | 0.0657  | 0.722450 |
| Usp30         | chr5:114100332-114123506  | 10.6621   | 10.2938   | -0.0507 | 0.748064 |
| Dhx37         | chr5:125414405-125434048  | 9.1634    | 9.6343    | 0.0723  | 0.477967 |
| Psph          | chr5:129765557-129787252  | 6.8768    | 7.3770    | 0.1013  | 0.739473 |
| Slc12a9       | chr5:137314557-137333597  | 3.4374    | 3.6941    | 0.1039  | 0.676584 |
| Usp39         | chr6:72318677-72345184    | 28.0461   | 29.4198   | 0.0690  | 0.650030 |
| Fbxl14        | chr6:119479667-119483886  | 33.1614   | 32.4825   | -0.0298 | 0.834463 |
| Necap1        | chr6:122874556-122888934  | 11.0776   | 10.6426   | -0.0578 | 0.747477 |
| Eif4g2        | chr7:111067984-111083030  | 80.8937   | 79.3712   | -0.0274 | 0.862935 |
| lqck          | chr7:118855759-118972652  | 0.1960    | 0.1448    | -0.4372 | 0.631575 |
| Lcmt1         | chr7:123377981-123430358  | 14.6756   | 15.6244   | 0.0904  | 0.602427 |
| Gm26586       | chr8:72137388-72140820    | 24.6105   | 26.0496   | 0.0820  | 0.728274 |
| Sin3b         | chr8:72723287-72758203    | 29.1936   | 28.6383   | -0.0277 | 0.795997 |
| Gm26265       | chr8:95756949-95757082    | 10.9139   | 8.6807    | -0.3303 | 0.674994 |
| Ces2c         | chr8:104847067-104854483  | 3.2291    | 3.6465    | 0.1754  | 0.725346 |
| Uqcrc1        | chr9:108936647-108949640  | 96.5101   | 94.0115   | -0.0378 | 0.866590 |
| Xk            | chrX:9272755-9313250      | 1.6164    | 1.5130    | -0.0954 | 0.584915 |
| Mir3113       | chrX:151859561-151859637  | 22.0960   | 18.4835   | -0.2575 | 0.715110 |
| Tlr7          | chrX:167304928-167330558  | 4.4126    | 4.7499    | 0.1063  | 0.716922 |
| Gm26884       | chr15:79689139-79692385   | 1.9469    | 1.7734    | -0.1347 | 0.726788 |
| Tuba1b        | chr15:98931424-98934565   | 8.3359    | 7.9104    | -0.0756 | 0.723926 |
| 1700087M22Rik | chr14:30770680-30778004   | 4.4574    | 5.8153    | 0.3836  | 0.707315 |
| Pbrm1         | chr14:31019137-31121592   | 29.9914   | 29.5559   | -0.0211 | 0.814300 |
| Ap1g2         | chr14:55098577-55106593   | 17.3160   | 16.9309   | -0.0324 | 0.731102 |
| Scaf8         | chr17:3114971-3198855     | 29.7289   | 30.9577   | 0.0584  | 0.647757 |
| Zfp414        | chr17:33629089-33631779   | 8.1775    | 7.7197    | -0.0831 | 0.782280 |
| Gm17251       | chr17:33759991-33761870   | 5.7354    | 6.4150    | 0.1615  | 0.644773 |
| Gpank1        | chr17:35121454-35124814   | 12.0371   | 12.8169   | 0.0906  | 0.631739 |
| Spats1        | chr17:45448936-45474938   | 1.2682    | 1.0586    | -0.2606 | 0.664428 |
| Mpnd          | chr17:56005710-56016790   | 19.1983   | 18.6556   | -0.0414 | 0.754894 |
| Yipf4         | chr17:74489492-74500277   | 27.6118   | 26.9126   | -0.0370 | 0.720399 |
| Zfp597        | chr16:3858320-3884561     | 9.5150    | 10.0667   | 0.0813  | 0.743494 |
| Polq          | chr16:37011785-37095417   | 3.7676    | 3.6295    | -0.0539 | 0.798490 |
| Atp6v1a       | chr16:44085401-44139705   | 11.1049   | 11.6429   | 0.0683  | 0.674269 |
| BC027231      | chr16:44724300-44737284   | 9.8691    | 10.3844   | 0.0734  | 0.670553 |
| Hsd17b4       | chr18:50128200-50196269   | 24.3058   | 25.4092   | 0.0640  | 0.603480 |
| Smim3         | chr18:60474192-60501983   | 1.1491    | 0.9801    | -0.2295 | 0.744059 |
| Snora17       | chr2:26639189-26639321    | 13.8218   | 11.7379   | -0.2358 | 0.722417 |
| Plekha3       | chr2:76675280-76696828    | 16.4732   | 15.9795   | -0.0439 | 0.811895 |
| Nckap1        | chr2:80500511-80581380    | 3.1933    | 3.4452    | 0.1096  | 0.699905 |
| Ints8         | chr4:11199157-11254258    | 10.6504   | 10.3412   | -0.0425 | 0.823473 |
| Rps6          | chr4:86854659-86857412    | 6.8836    | 6.3032    | -0.1271 | 0.816685 |
| Gm12696       | chr4:97521427-97522332    | 15.1624   | 16.3729   | 0.1108  | 0.603462 |
| Gm12992       | chr4:131899477-131920029  | 8.4104    | 8.1108    | -0.0523 | 0.836504 |
| Ube2j2        | chr4:155943830-155959604  | 8.5678    | 8.2547    | -0.0537 | 0.810494 |
| Slc35e3       | chr10:117733678-117746358 | 0.7215    | 0.8626    | 0.2577  | 0.732030 |
| NA            | chr11:120627680-120628181 | 6.4113    | 5.3859    | -0.2514 | 0.729041 |
| Gm16578       | chr13:54219452-54223023   | 0.9102    | 0.6564    | -0.4716 | 0.639048 |
| Hspe1-ps3     | chr5:25391607-25391884    | 2.9481    | 3.9133    | 0.4086  | 0.714632 |
| Ctrl          | chr8:105931993-105933862  | 2.2464    | 1.8280    | -0.2973 | 0.719203 |
| Scn3b         | chr9:40269215-40291618    | 0.3580    | 0.4611    | 0.3649  | 0.767966 |
| Gm14513       | chrX:11684001-11684124    | 5.7711    | 7.6687    | 0.4101  | 0.655224 |
| Krt18         | chr15:102028215-102032026 | 0.6260    | 0.4605    | -0.4428 | 0.658207 |
| Gm10912       | chr2:104065825-104067486  | 0.6043    | 0.4277    | -0.4988 | 0.755533 |
| Gm12912       | chr4:75147608-75148989    | 0.3889    | 0.5071    | 0.3830  | 0.447643 |
| Gm13031       | chr4:140947665-140957902  | 1.8067    | 2.2179    | 0.2958  | 0.651333 |
| Dsp           | chr13:38151327-38198577   | 0.8248    | 0.9315    | 0.1755  | 0.813434 |
| Pex3          | chr10:13523841-13553142   | 7.1769    | 7.5287    | 0.0691  | 0.133458 |
| Stx7          | chr10:24149316-24188959   | 11.3470   | 11.9945   | 0.0801  | 0.658014 |
| Micu1         | chr10:59702476-59864132   | 7.8378    | 7.6569    | -0.0337 | 0.831688 |
| Supv3l1       | chr10:62429208-62449738   | 13.7350   | 14.6031   | 0.0884  | 0.741812 |
| Sirt1         | chr10:63319004-63381704   | 12.6155   | 13.2449   | 0.0702  | 0.697419 |
| Pfkl          | chr10:77986946-78010083   | 23.1146   | 22.3530   | -0.0483 | 0.874995 |
| Rrp1          | chr10:78400361-78413043   | 95.6513   | 94.0836   | -0.0238 | 0.867059 |
| Mum1          | chr10:80226433-80243903   | 14.9932   | 15.6070   | 0.0579  | 0.716213 |
| Amh           | chr10:80805247-80807648   | 0.7321    | 0.6010    | -0.2846 | 0.736908 |
| Eef2          | chr10:81176630-81182507   | 1048.8073 | 1031.8944 | -0.0235 | 0.892884 |
| Snord37       | chr10:81178949-81179013   | 18.2314   | 15.3471   | -0.2485 | 0.529309 |
| NA            | chr10:89724749-89724875   | 6.3633    | 4.8813    | -0.3825 | 0.698108 |

|               |                           |         |         |         |          |
|---------------|---------------------------|---------|---------|---------|----------|
| Tmtc3         | chr10:100443901-100487350 | 0.5397  | 0.4829  | -0.1605 | 0.804609 |
| Rassf3        | chr10:121410349-121476250 | 10.1414 | 10.7159 | 0.0795  | 0.706869 |
| Gm12592       | chr11:3305425-3331178     | 6.4996  | 6.2177  | -0.0640 | 0.821552 |
| Rnf185        | chr11:3415981-3452363     | 9.0764  | 9.6222  | 0.0842  | 0.637700 |
| Uqcr10        | chr11:4701972-4704342     | 76.4730 | 82.3591 | 0.1070  | 0.797002 |
| Smek2         | chr11:29172889-29220797   | 69.4032 | 68.4153 | -0.0207 | 0.853580 |
| Rtn4          | chr11:29692946-29744331   | 14.8559 | 15.4622 | 0.0577  | 0.671322 |
| Gm12102       | chr11:31003294-31003898   | 2.7250  | 3.4491  | 0.3400  | 0.751233 |
| Stk10         | chr11:32533304-32624587   | 83.8429 | 86.8473 | 0.0508  | 0.685981 |
| Snord96a      | chr11:48802031-48802112   | 55.8098 | 62.4331 | 0.1618  | 0.689460 |
| Gm25082       | chr11:51270434-51270689   | 28.6198 | 26.4766 | -0.1123 | 0.784001 |
| Gm26551       | chr11:51949881-52269514   | 6.9674  | 6.5906  | -0.0802 | 0.842021 |
| Gm12258       | chr11:58847157-58861956   | 9.9030  | 10.3868 | 0.0688  | 0.611141 |
| Cd68          | chr11:69664212-69666153   | 5.3452  | 4.9443  | -0.1125 | 0.771223 |
| Slc16a13      | chr11:70216788-70220994   | 1.5224  | 1.3954  | -0.1257 | 0.252460 |
| 1200014J11Rik | chr11:73047782-73080217   | 14.7243 | 14.4080 | -0.0313 | 0.864015 |
| Shpk          | chr11:73199459-73224511   | 3.0054  | 3.2556  | 0.1154  | 0.625608 |
| Vps53         | chr11:76046225-76179647   | 11.5359 | 12.0876 | 0.0674  | 0.637570 |
| Rnmt1         | chr11:76243714-76250619   | 6.5383  | 6.1794  | -0.0814 | 0.822805 |
| Gosr1         | chr11:76726601-76763579   | 23.8707 | 24.7594 | 0.0527  | 0.131373 |
| Brip1os       | chr11:86201369-86304443   | 17.0818 | 17.7624 | 0.0564  | 0.660617 |
| Fam117a       | chr11:95337017-95381872   | 24.4923 | 25.6939 | 0.0691  | 0.737670 |
| Pip4k2b       | chr11:97715156-97744704   | 25.2675 | 24.7963 | -0.0272 | 0.829989 |
| Taco1         | chr11:106066060-106073612 | 7.9211  | 7.4661  | -0.0853 | 0.788351 |
| Sept9         | chr11:117199660-117362325 | 67.4360 | 69.9515 | 0.0528  | 0.697869 |
| Tmc6          | chr11:117765987-117782198 | 36.4698 | 35.7636 | -0.0282 | 0.855200 |
| B3gnt1        | chr11:121616196-121673153 | 11.0457 | 11.7073 | 0.0839  | 0.759153 |
| 1700030C10Rik | chr12:20814256-20815727   | 0.7918  | 0.6107  | -0.3746 | 0.768763 |
| Zfp125        | chr12:20899821-20900867   | 8.9761  | 10.1490 | 0.1772  | 0.738171 |
| Gm17195       | chr12:79163407-79163835   | 9.3509  | 8.4976  | -0.1380 | 0.670740 |
| Slc10a1       | chr12:80953184-80968079   | 4.0891  | 4.5753  | 0.1621  | 0.732109 |
| Zfyve1        | chr12:83546940-83597147   | 12.2512 | 12.7810 | 0.0611  | 0.376004 |
| Acot2         | chr12:83987860-83993873   | 9.8790  | 9.5205  | -0.0533 | 0.800415 |
| Npc2          | chr12:84754559-84773112   | 70.3702 | 72.9819 | 0.0526  | 0.688297 |
| Gm17139       | chr12:84918147-84919238   | 49.1592 | 47.3446 | -0.0543 | 0.795890 |
| Prox2         | chr12:85085813-85106431   | 1.6526  | 1.5242  | -0.1167 | 0.721087 |
| Psmc1         | chr12:100110185-100123364 | 60.8255 | 63.5879 | 0.0641  | 0.730048 |
| Ryr2          | chr13:11553102-12106945   | 0.1958  | 0.1604  | -0.2880 | 0.839920 |
| Arid4b        | chr13:14063231-14199603   | 15.8627 | 15.5188 | -0.0316 | 0.865207 |
| Zfp429        | chr13:67389308-67399767   | 11.7036 | 12.3827 | 0.0814  | 0.653665 |
| Zfp825        | chr13:74480516-74482943   | 5.9848  | 5.4625  | -0.1318 | 0.746870 |
| Zcchc9        | chr13:91796532-91807705   | 16.1546 | 16.9156 | 0.0664  | 0.669032 |
| Rasgrf2       | chr13:91880399-92131656   | 0.6414  | 0.5719  | -0.1655 | 0.842965 |
| Smn1          | chr13:100124851-100137690 | 4.4409  | 4.7894  | 0.1090  | 0.651386 |
| Nnt           | chr13:119335447-119408997 | 5.1241  | 5.3982  | 0.0752  | 0.637808 |
| Mrpl33        | chr5:31596934-31701972    | 9.0656  | 8.8394  | -0.0364 | 0.846938 |
| Gm20671       | chr5:32737229-32827109    | 30.8917 | 32.3805 | 0.0679  | 0.556223 |
| Tmem129       | chr5:33653215-33657977    | 10.1859 | 9.8049  | -0.0550 | 0.800930 |
| Nelfa         | chr5:33896935-33936413    | 9.8478  | 10.3503 | 0.0718  | 0.710949 |
| Mrfap1        | chr5:36794866-36796772    | 34.6238 | 36.4025 | 0.0723  | 0.715291 |
| Jakmip1       | chr5:37028334-37148001    | 17.7467 | 17.3785 | -0.0302 | 0.868379 |
| Tmem156       | chr5:65063207-65091555    | 22.8242 | 21.7172 | -0.0717 | 0.784493 |
| 5430416N02Rik | chr5:100420841-100429516  | 10.2435 | 9.8753  | -0.0528 | 0.829289 |
| Helq          | chr5:100762144-100798598  | 6.3944  | 6.2170  | -0.0406 | 0.762139 |
| Chfr          | chr5:110135839-110171972  | 33.0812 | 32.5845 | -0.0218 | 0.788572 |
| Ficd          | chr5:113735781-113740600  | 4.1904  | 3.9687  | -0.0784 | 0.761536 |
| Hnf1a         | chr5:114948360-114971067  | 1.3955  | 1.5390  | 0.1412  | 0.726057 |
| Ppp1cc        | chr5:122158277-122175273  | 5.7125  | 6.1648  | 0.1099  | 0.746630 |
| A430033K04Rik | chr5:138622858-138648903  | 6.0535  | 6.3917  | 0.0784  | 0.452213 |
| Gm23202       | chr5:146835143-146835272  | 11.5335 | 14.4124 | 0.3215  | 0.709331 |
| NA            | chr5:146895791-146896196  | 2.2270  | 1.6860  | -0.4015 | 0.737349 |
| Hmgb1         | chr5:149046701-149053513  | 7.4492  | 7.2628  | -0.0366 | 0.545274 |
| C1galt1       | chr6:7844841-7872047      | 28.8623 | 30.1804 | 0.0644  | 0.719594 |
| Irf5          | chr6:29526624-29541869    | 17.7860 | 18.6824 | 0.0709  | 0.668865 |
| Smo           | chr6:29735693-29761365    | 1.8428  | 2.0435  | 0.1492  | 0.729580 |
| Wdr91         | chr6:34880425-34910876    | 13.4223 | 12.9498 | -0.0517 | 0.824385 |
| Slc37a3       | chr6:39334769-39377707    | 9.6619  | 9.3469  | -0.0478 | 0.816347 |
| Zyx           | chr6:42349827-42360146    | 15.0490 | 14.5490 | -0.0488 | 0.849989 |
| Mbd4          | chr6:115840696-115853371  | 5.1762  | 5.5196  | 0.0927  | 0.690201 |
| Gm20531       | chr6:124732167-124738040  | 22.7908 | 24.3663 | 0.0964  | 0.785632 |
| NA            | chr6:125494423-125509135  | 0.7387  | 0.9286  | 0.3302  | 0.701622 |

|               |                          |          |          |         |          |
|---------------|--------------------------|----------|----------|---------|----------|
| Cd69          | chr6:129267323-129275369 | 84.0080  | 81.8093  | -0.0383 | 0.882055 |
| C2cd5         | chr6:143010919-143100107 | 22.2869  | 23.4004  | 0.0703  | 0.754107 |
| Tmem160       | chr7:16452778-16455489   | 24.7975  | 26.7016  | 0.1067  | 0.763115 |
| Sptbn4        | chr7:27356382-27447686   | 0.2145   | 0.2682   | 0.3219  | 0.796113 |
| Gmfg          | chr7:28437446-28448233   | 18.2146  | 19.2799  | 0.0820  | 0.764952 |
| Gm4673        | chr7:30957408-30961619   | 4.4792   | 4.7918   | 0.0973  | 0.706514 |
| Snord33       | chr7:45126863-45126947   | 14.4540  | 17.8691  | 0.3060  | 0.605566 |
| Btbd1         | chr7:81792074-81829431   | 19.0816  | 19.9482  | 0.0641  | 0.586266 |
| Ddias         | chr7:92857528-92874213   | 2.9021   | 3.1575   | 0.1217  | 0.694050 |
| NA            | chr7:100545755-100547620 | 1.1352   | 0.9127   | -0.3147 | 0.815317 |
| Timm10b       | chr7:105640055-105655748 | 11.0797  | 11.6682  | 0.0747  | 0.717752 |
| Ilk           | chr7:105736591-105742925 | 37.9852  | 37.3867  | -0.0229 | 0.785104 |
| Ppfbp2        | chr7:107595050-107748582 | 0.4175   | 0.3525   | -0.2443 | 0.751174 |
| NA            | chr7:110766676-110769345 | 0.7158   | 0.8232   | 0.2016  | 0.535377 |
| Nsmce1        | chr7:125467639-125491596 | 32.6567  | 34.6381  | 0.0850  | 0.763543 |
| Nfatc2ip      | chr7:126382853-126396737 | 4.6303   | 4.3933   | -0.0758 | 0.804272 |
| Prss53        | chr7:127885840-127890970 | 3.9102   | 3.6578   | -0.0962 | 0.738026 |
| Glr3          | chr7:137437647-137468594 | 16.0138  | 15.3430  | -0.0617 | 0.819010 |
| Rplp2         | chr7:141447369-141451585 | 70.4548  | 74.3063  | 0.0768  | 0.806993 |
| Chid1         | chr7:141493135-141539857 | 3.9342   | 4.1223   | 0.0674  | 0.628001 |
| Tollip        | chr7:141874812-141918507 | 11.9255  | 12.4493  | 0.0620  | 0.585121 |
| Osbp15        | chr7:143688761-143756985 | 9.5926   | 10.1974  | 0.0882  | 0.792850 |
| Nadsyn1       | chr7:143795583-143822849 | 6.2032   | 6.6438   | 0.0990  | 0.768248 |
| Zfp358        | chr8:3493137-3497208     | 2.3130   | 2.6386   | 0.1900  | 0.730153 |
| Zfp958        | chr8:4625839-4629380     | 20.4113  | 19.4407  | -0.0703 | 0.840554 |
| Tnfsf13b      | chr8:10006842-10035441   | 0.7748   | 1.0205   | 0.3974  | 0.687132 |
| Thap1         | chr8:26158211-26162940   | 6.6493   | 7.2319   | 0.1212  | 0.655446 |
| 4933416M07Rik | chr8:27142909-27149671   | 7.5507   | 7.0947   | -0.0899 | 0.762405 |
| 1700029J07Rik | chr8:45953605-45975252   | 1.4248   | 1.2799   | -0.1547 | 0.756372 |
| Sugp1         | chr8:70042812-70071953   | 23.7991  | 23.1250  | -0.0415 | 0.853914 |
| Zfp882        | chr8:71908607-71916354   | 6.0165   | 6.9862   | 0.2156  | 0.674310 |
| Zfp617        | chr8:71908634-71934629   | 5.8784   | 6.2596   | 0.0907  | 0.505934 |
| Ndufb7        | chr8:83566670-83571626   | 13.5774  | 14.3062  | 0.0754  | 0.736558 |
| 1700122E12Rik | chr8:84847187-84848415   | 1.9441   | 1.5534   | -0.3237 | 0.802918 |
| Phkb          | chr8:85840958-86061376   | 6.1446   | 5.9692   | -0.0418 | 0.836130 |
| Zdhhc1        | chr8:105472480-105484350 | 2.2028   | 1.9605   | -0.1681 | 0.783986 |
| Rpl13         | chr8:123102349-123105244 | 20.2728  | 21.4324  | 0.0802  | 0.763474 |
| Coa6          | chr8:126422500-126425434 | 13.0440  | 14.5736  | 0.1600  | 0.810299 |
| Mir1903       | chr8:128359240-128359320 | 83.5213  | 92.4490  | 0.1465  | 0.663244 |
| Kbtbd3        | chr9:4309742-4331721     | 4.2669   | 3.9698   | -0.1041 | 0.836382 |
| Mttr2         | chr9:13748409-13806481   | 15.7340  | 16.5328  | 0.0714  | 0.742971 |
| Keap1         | chr9:21229729-21239332   | 18.8236  | 19.5674  | 0.0559  | 0.589058 |
| PrkcsH        | chr9:22003034-22014219   | 52.5867  | 51.7434  | -0.0233 | 0.815430 |
| Gm16214       | chr9:42022614-42034113   | 5.8032   | 6.5893   | 0.1833  | 0.787243 |
| Cd3d          | chr9:44981792-44987052   | 171.3009 | 178.3836 | 0.0584  | 0.742093 |
| Rnf214        | chr9:45863424-45906894   | 6.0957   | 6.5047   | 0.0937  | 0.770523 |
| Pias1         | chr9:62880076-62980879   | 17.8096  | 17.4518  | -0.0293 | 0.795929 |
| Parp16        | chr9:65214689-65239219   | 1.9307   | 2.1765   | 0.1729  | 0.726185 |
| Sltm          | chr9:70542919-70592237   | 51.1183  | 50.2213  | -0.0255 | 0.863898 |
| Mb21d1        | chr9:78430525-78443237   | 2.4130   | 2.6441   | 0.1320  | 0.737055 |
| Adams7        | chr9:90162977-90208071   | 0.8124   | 0.7366   | -0.1413 | 0.778669 |
| Plod2         | chr9:92542222-92608428   | 2.8645   | 2.6863   | -0.0927 | 0.721632 |
| U2surp        | chr9:95456893-95511996   | 36.2440  | 35.4641  | -0.0314 | 0.867655 |
| Plcd1         | chr9:119071526-119093496 | 0.7913   | 0.9222   | 0.2209  | 0.717034 |
| Otud5         | chrX:7841363-7876626     | 36.2617  | 35.6291  | -0.0254 | 0.853271 |
| Atp6ap2       | chrX:12587800-12617049   | 20.6333  | 20.0833  | -0.0390 | 0.802602 |
| Uba1          | chrX:20658325-20683179   | 112.5345 | 111.2691 | -0.0163 | 0.851574 |
| Htatsf1       | chrX:57053582-57067183   | 13.9108  | 14.7970  | 0.0891  | 0.822579 |
| RbmX          | chrX:57383529-57393036   | 36.4285  | 35.8627  | -0.0226 | 0.830519 |
| F8            | chrX:75172714-75382615   | 0.3538   | 0.4023   | 0.1853  | 0.726618 |
| ArmcX2        | chrX:134804144-134809221 | 7.5450   | 7.3300   | -0.0417 | 0.762096 |
| 3632454L22Rik | chrX:135022733-135060336 | 1.1101   | 1.0098   | -0.1367 | 0.736803 |
| Tbc1d8b       | chrX:139684995-139753405 | 6.6989   | 6.4971   | -0.0441 | 0.764344 |
| Gm15066       | chrX:144285725-144288333 | 0.8715   | 0.7258   | -0.2639 | 0.669390 |
| Msl3          | chrX:168654116-168673898 | 26.2201  | 25.6460  | -0.0319 | 0.804742 |
| BC037032      | chr15:4021685-4027402    | 0.9295   | 1.0534   | 0.1805  | 0.716639 |
| Spef2         | chr15:9578192-9748868    | 0.5047   | 0.4556   | -0.1476 | 0.605836 |
| Gm25713       | chr15:12158332-12158441  | 9.5823   | 12.4707  | 0.3801  | 0.765731 |
| Taf2          | chr15:55015128-55072152  | 20.3921  | 21.2038  | 0.0563  | 0.672093 |
| Parp10        | chr15:76231173-76243441  | 20.6557  | 21.7331  | 0.0734  | 0.742543 |
| Exosc4        | chr15:76327396-76330677  | 14.3548  | 15.1881  | 0.0814  | 0.690702 |

|               |                           |          |          |         |          |
|---------------|---------------------------|----------|----------|---------|----------|
| Slc16a8       | chr15:79251013-79254761   | 0.4382   | 0.3276   | -0.4196 | 0.678206 |
| Ldoc1l        | chr15:84553397-84557823   | 3.7321   | 3.9837   | 0.0941  | 0.662043 |
| Phf21b        | chr15:84785380-84856049   | 0.9106   | 0.7934   | -0.1989 | 0.819441 |
| Fbln1         | chr15:85205948-85286535   | 0.1560   | 0.1216   | -0.3589 | 0.716373 |
| Prkag1        | chr15:98812797-98831508   | 56.8285  | 59.2952  | 0.0613  | 0.650784 |
| Csad          | chr15:102176997-102189043 | 4.8007   | 4.5159   | -0.0882 | 0.774540 |
| Gm26518       | chr15:102455525-102483722 | 3.9258   | 4.2191   | 0.1040  | 0.630168 |
| Ndst2         | chr14:20723738-20730327   | 10.2791  | 9.9679   | -0.0444 | 0.758314 |
| Ccdc66        | chr14:27482411-27508460   | 17.4849  | 17.0421  | -0.0370 | 0.731599 |
| Actr8         | chr14:29978336-29993221   | 25.2581  | 24.7071  | -0.0318 | 0.650830 |
| Traj23        | chr14:54196080-54196140   | 129.5551 | 119.7819 | -0.1132 | 0.812852 |
| Gm17606       | chr14:54640951-54648293   | 36.8158  | 40.1385  | 0.1247  | 0.702361 |
| Ints9         | chr14:64950044-65039835   | 7.8981   | 8.4069   | 0.0901  | 0.669027 |
| Elp3          | chr14:65530445-65593112   | 28.0527  | 27.4454  | -0.0316 | 0.810620 |
| Sorbs3        | chr14:70180467-70207637   | 0.2987   | 0.2376   | -0.3301 | 0.628424 |
| Ppp3cc        | chr14:70217897-70289449   | 33.2237  | 34.6603  | 0.0611  | 0.459278 |
| Polr3d        | chr14:70438747-70443471   | 14.9873  | 14.5212  | -0.0456 | 0.784194 |
| Reep4         | chr14:70545250-70548933   | 16.4217  | 15.7541  | -0.0599 | 0.845985 |
| Tpt1          | chr14:75845092-75848525   | 12.7441  | 13.6668  | 0.1008  | 0.794012 |
| Gm22877       | chr14:103650452-103650557 | 34.1702  | 39.0906  | 0.1941  | 0.740630 |
| Ppp2r1a       | chr17:20945310-20965916   | 59.5257  | 61.8760  | 0.0559  | 0.691288 |
| Gm26695       | chr17:23556768-23558313   | 9.2320   | 9.9955   | 0.1146  | 0.694622 |
| 1600002H07Rik | chr17:24215053-24220851   | 4.6827   | 4.4581   | -0.0709 | 0.626582 |
| Wfikkn1       | chr17:25877629-25880305   | 2.7019   | 2.4404   | -0.1468 | 0.829126 |
| Mrpl28        | chr17:26123519-26126613   | 25.5598  | 24.5035  | -0.0609 | 0.851578 |
| Uhrf1bp1      | chr17:27856489-27900040   | 2.1246   | 2.0161   | -0.0756 | 0.843402 |
| Anks1         | chr17:27909339-28062600   | 8.0807   | 7.8079   | -0.0495 | 0.836718 |
| Gm15598       | chr17:27988027-28008432   | 4.4539   | 3.9628   | -0.1686 | 0.675440 |
| Zfp523        | chr17:28177206-28205886   | 3.2407   | 3.5054   | 0.1133  | 0.743562 |
| Cmtr1         | chr17:29549798-29705979   | 31.1145  | 30.6672  | -0.0209 | 0.846412 |
| H2-Eb2        | chr17:34325664-34340229   | 0.5720   | 0.4285   | -0.4166 | 0.751503 |
| Dxo           | chr17:34837018-34839233   | 14.1371  | 13.5364  | -0.0626 | 0.805619 |
| Nelfe         | chr17:34850390-34856372   | 14.4694  | 13.9614  | -0.0516 | 0.728988 |
| H2-Q7         | chr17:35439154-35443773   | 58.2928  | 57.0370  | -0.0314 | 0.894565 |
| Flot1         | chr17:35823229-35832791   | 8.4554   | 8.9943   | 0.0891  | 0.765989 |
| Gm16279       | chr17:35896945-35912215   | 2.3570   | 2.6125   | 0.1484  | 0.731298 |
| NA            | chr17:35994515-35999749   | 3.8715   | 4.3015   | 0.1520  | 0.820314 |
| H2-T10        | chr17:36115875-36121465   | 10.1694  | 10.7178  | 0.0758  | 0.709043 |
| Nfkbie        | chr17:45555715-45563169   | 26.9696  | 26.1924  | -0.0422 | 0.868321 |
| Cul9          | chr17:46500571-46546388   | 0.9860   | 0.9331   | -0.0795 | 0.750176 |
| Gm20517       | chr17:47611588-47683861   | 4.0885   | 3.9665   | -0.0437 | 0.582832 |
| Sult6b1       | chr17:78883937-78906992   | 3.5072   | 3.9144   | 0.1585  | 0.769223 |
| Gm17315       | chr17:79354698-79358022   | 0.7871   | 0.9132   | 0.2145  | 0.608238 |
| Cdkl4         | chr17:80523549-80563834   | 0.9326   | 0.8080   | -0.2068 | 0.727161 |
| Rhoq          | chr17:86963081-87000069   | 4.4682   | 4.7458   | 0.0870  | 0.624017 |
| Nlrc3         | chr16:3945006-3976632     | 17.7624  | 17.3070  | -0.0375 | 0.895997 |
| Rogdi         | chr16:5008729-5013517     | 2.3652   | 2.6594   | 0.1692  | 0.605144 |
| 1700056N10Rik | chr16:17047519-17049111   | 5.2792   | 5.9980   | 0.1842  | 0.817752 |
| Ranbp1        | chr16:18239783-18248732   | 78.7939  | 82.9392  | 0.0740  | 0.777465 |
| Gm24201       | chr16:23110382-23110507   | 66.9574  | 73.1296  | 0.1272  | 0.702215 |
| Ncbp2         | chr16:31948512-31961781   | 15.8651  | 16.8821  | 0.0896  | 0.801901 |
| lqcg          | chr16:33015384-33056218   | 1.6422   | 1.4584   | -0.1712 | 0.793462 |
| Cox17         | chr16:38346990-38352763   | 9.3649   | 9.8145   | 0.0676  | 0.530852 |
| Cxadr         | chr16:78301495-78359785   | 0.7682   | 0.6958   | -0.1429 | 0.794413 |
| Donson        | chr16:91677267-91688765   | 35.9371  | 37.4093  | 0.0579  | 0.631123 |
| Wrb           | chr16:96145406-96157852   | 2.6226   | 2.8209   | 0.1051  | 0.469493 |
| Doc2g         | chr19:4003320-4007005     | 1.7820   | 1.5964   | -0.1587 | 0.795901 |
| Ccdc85b       | chr19:5456788-5457397     | 15.6847  | 17.2043  | 0.1334  | 0.731989 |
| Cfl1          | chr19:5490484-5494029     | 486.5232 | 505.0464 | 0.0539  | 0.709854 |
| Capn1         | chr19:5988545-6015825     | 63.7662  | 62.5303  | -0.0282 | 0.878447 |
| Gldc          | chr19:30098448-30175418   | 0.3392   | 0.4066   | 0.2613  | 0.731112 |
| Al606181      | chr19:41593362-41596158   | 2.6441   | 2.8988   | 0.1327  | 0.730301 |
| Col17a1       | chr19:47646343-47692094   | 0.3015   | 0.2577   | -0.2269 | 0.773579 |
| Smndc1        | chr19:53379213-53390573   | 14.6792  | 15.7613  | 0.1026  | 0.785105 |
| B230217012Rik | chr19:57323384-57360775   | 2.7520   | 2.4655   | -0.1586 | 0.756833 |
| Mybl1         | chr1:9667414-9700209      | 1.1350   | 1.2550   | 0.1451  | 0.787095 |
| Rpl7          | chr1:16101294-16104662    | 166.2628 | 179.6117 | 0.1114  | 0.746827 |
| Gm26580       | chr1:21959841-21962530    | 6.4259   | 5.9707   | -0.1060 | 0.839155 |
| Mgat4a        | chr1:37439339-37541016    | 5.6309   | 5.9273   | 0.0740  | 0.696320 |
| Stradb        | chr1:58973521-58995715    | 2.5449   | 2.4079   | -0.0798 | 0.834317 |
| Raph1         | chr1:60483190-60567104    | 4.9042   | 5.2552   | 0.0997  | 0.724464 |



|               |                          |         |         |         |          |
|---------------|--------------------------|---------|---------|---------|----------|
| Slc11a1       | chr1:74375202-74386062   | 0.3255  | 0.2725  | -0.2564 | 0.708690 |
| Wdfy1         | chr1:79702261-79776143   | 3.2293  | 3.4900  | 0.1120  | 0.758772 |
| Fam124b       | chr1:80198705-80218473   | 2.6710  | 2.5007  | -0.0950 | 0.743450 |
| Fam132b       | chr1:91366429-91374216   | 2.0537  | 2.2767  | 0.1487  | 0.734040 |
| Ppip5k2       | chr1:97706047-97770411   | 16.2551 | 16.8694 | 0.0535  | 0.677112 |
| Cacna1s       | chr1:136052749-136119822 | 0.5180  | 0.5989  | 0.2094  | 0.784469 |
| Lamc2         | chr1:153122755-153186447 | 0.3596  | 0.4155  | 0.2085  | 0.698007 |
| Dusp12        | chr1:170873497-170885540 | 7.2598  | 6.9559  | -0.0617 | 0.828184 |
| Fcer1g        | chr1:171229571-171234365 | 1.6567  | 1.4036  | -0.2392 | 0.620341 |
| Tfb2m         | chr1:179528054-179546267 | 2.8112  | 3.1066  | 0.1442  | 0.712850 |
| Parp1         | chr1:180568954-180601253 | 54.4786 | 53.6497 | -0.0221 | 0.821187 |
| Degs1         | chr1:182275771-182282804 | 26.7544 | 27.8620 | 0.0585  | 0.363452 |
| Iars2         | chr1:185284725-185329396 | 16.8268 | 16.5465 | -0.0242 | 0.869114 |
| Rcor3         | chr1:192098655-192138010 | 4.7247  | 5.0482  | 0.0955  | 0.602856 |
| Esco1         | chr18:10566601-10610352  | 33.3703 | 32.7198 | -0.0284 | 0.851483 |
| Impact        | chr18:12972251-12992948  | 12.5404 | 12.1273 | -0.0483 | 0.853414 |
| Zfp191        | chr18:24009701-24020810  | 12.9428 | 12.5894 | -0.0399 | 0.834489 |
| Elp2          | chr18:24603960-24638830  | 40.9106 | 40.0564 | -0.0304 | 0.859262 |
| Wdr36         | chr18:32837224-32866420  | 36.7797 | 35.8283 | -0.0378 | 0.875468 |
| Kdm3b         | chr18:34777007-34839370  | 26.7448 | 26.3668 | -0.0205 | 0.825765 |
| Dnajc18       | chr18:35671102-35703144  | 6.3217  | 6.6627  | 0.0758  | 0.575805 |
| Ndst1         | chr18:60685977-60713389  | 16.2200 | 15.8052 | -0.0374 | 0.861394 |
| Frmd4a        | chr2:4017716-4614043     | 0.1261  | 0.1455  | 0.2065  | 0.759558 |
| Rbm17         | chr2:11585438-11604153   | 36.1028 | 37.7400 | 0.0640  | 0.697368 |
| Tmem203       | chr2:25255438-25256352   | 6.2252  | 6.8865  | 0.1457  | 0.741755 |
| Gm13427       | chr2:31676363-31688469   | 4.7202  | 4.0938  | -0.2054 | 0.839630 |
| 9430097D07Rik | chr2:32574183-32575684   | 1.0366  | 0.8858  | -0.2268 | 0.662710 |
| St6galnac4    | chr2:32587094-32599698   | 14.2691 | 13.8027 | -0.0479 | 0.866951 |
| Orc4          | chr2:48902823-48950277   | 10.8841 | 11.4361 | 0.0714  | 0.725724 |
| Neb           | chr2:52136646-52338798   | 16.1449 | 15.7647 | -0.0344 | 0.895540 |
| Harbi1        | chr2:91710851-91721545   | 2.8805  | 3.0845  | 0.0987  | 0.651364 |
| Ccdc73        | chr2:104867804-105017904 | 1.5251  | 1.7080  | 0.1634  | 0.766841 |
| Arl14ep       | chr2:106962526-106974424 | 10.0131 | 10.4678 | 0.0641  | 0.580701 |
| Aven          | chr2:112492963-112634573 | 10.8001 | 10.4789 | -0.0436 | 0.830894 |
| Scg5          | chr2:113776361-113829121 | 1.7192  | 1.9982  | 0.2170  | 0.697853 |
| Rad51         | chr2:119112792-119147445 | 2.4970  | 2.6613  | 0.0919  | 0.419848 |
| Tmem127       | chr2:127247907-127261107 | 34.5265 | 34.0100 | -0.0217 | 0.797038 |
| 1500011K16Rik | chr2:127791387-127792488 | 12.4596 | 11.7671 | -0.0825 | 0.728267 |
| Gm14005       | chr2:128195992-128429349 | 3.5808  | 4.0098  | 0.1633  | 0.784591 |
| 1700026D11Rik | chr2:132490633-132524057 | 0.4374  | 0.3428  | -0.3517 | 0.747822 |
| 1110034G24Rik | chr2:132686930-132751055 | 6.3928  | 6.1218  | -0.0625 | 0.613110 |
| Slx4ip        | chr2:136891217-137071950 | 3.7218  | 3.9524  | 0.0867  | 0.669579 |
| Gm26681       | chr2:150748280-150750762 | 1.7993  | 2.0578  | 0.1937  | 0.647235 |
| Asxl1         | chr2:153345844-153404007 | 33.5213 | 35.0692 | 0.0651  | 0.787809 |
| a             | chr2:154791401-155051012 | 10.8541 | 11.9397 | 0.1375  | 0.806006 |
| Trpc4ap       | chr2:155634270-155692384 | 26.2916 | 25.9942 | -0.0164 | 0.831939 |
| NA            | chr2:157133905-157133972 | 14.0559 | 17.2209 | 0.2930  | 0.712577 |
| Gm11457       | chr2:164754241-164769666 | 9.2565  | 10.1795 | 0.1371  | 0.603879 |
| Slco4a1       | chr2:180456244-180474867 | 0.9092  | 0.8232  | -0.1434 | 0.684064 |
| Gmeb2         | chr2:181251448-181288035 | 10.6916 | 11.2599 | 0.0747  | 0.731632 |
| Mrps28        | chr3:8802145-8923918     | 15.3050 | 14.2393 | -0.1041 | 0.807648 |
| Pik3ca        | chr3:32397670-32468486   | 28.2691 | 29.2901 | 0.0512  | 0.633905 |
| Mrpl47        | chr3:32725396-32737147   | 9.6861  | 10.2541 | 0.0822  | 0.709519 |
| Gm12531       | chr3:37052214-37060035   | 9.9648  | 9.1212  | -0.1276 | 0.548644 |
| Siah2         | chr3:58674937-58692400   | 4.8258  | 5.2053  | 0.1092  | 0.754901 |
| Gmps          | chr3:63976105-64022579   | 11.8493 | 12.4149 | 0.0673  | 0.751143 |
| Kcnab1        | chr3:65109383-65378223   | 0.6516  | 0.5821  | -0.1628 | 0.814400 |
| Mir15b        | chr3:69009755-69009853   | 22.0243 | 25.2855 | 0.1992  | 0.585431 |
| Gpatch4       | chr3:88043107-88055993   | 13.1537 | 12.5410 | -0.0688 | 0.798577 |
| Jtb           | chr3:90231596-90235838   | 36.5940 | 35.6407 | -0.0381 | 0.809093 |
| Snx27         | chr3:94497543-94582716   | 12.3956 | 12.1336 | -0.0308 | 0.791140 |
| Ensa          | chr3:95624979-95632102   | 43.7093 | 45.2947 | 0.0514  | 0.403311 |
| Pias3         | chr3:96696383-96706070   | 4.7464  | 5.1780  | 0.1255  | 0.803554 |
| Prkab2        | chr3:97658192-97673812   | 3.3906  | 3.6351  | 0.1005  | 0.703965 |
| Hipk1         | chr3:103739814-103791563 | 35.8804 | 35.3190 | -0.0228 | 0.857409 |
| Psrc1         | chr3:108383838-108388231 | 2.0292  | 1.8461  | -0.1364 | 0.787488 |
| Cisd2         | chr3:135406411-135423925 | 14.1279 | 14.8371 | 0.0707  | 0.718859 |
| Znhit6        | chr3:145576207-145605245 | 4.6450  | 4.4088  | -0.0753 | 0.808733 |
| 2410004B18Rik | chr3:145938013-145944829 | 12.3087 | 11.8618 | -0.0534 | 0.635878 |
| Tyw3          | chr3:154576519-154597104 | 2.0756  | 1.9520  | -0.0886 | 0.636190 |
| Rab2a         | chr4:8535643-8607778     | 44.7569 | 46.8358 | 0.0655  | 0.718009 |

|               |                           |          |          |         |          |
|---------------|---------------------------|----------|----------|---------|----------|
| Nbn           | chr4:15957924-15992589    | 23.8103  | 23.1471  | -0.0408 | 0.845361 |
| Cdc26         | chr4:62383653-62408642    | 2.7435   | 2.9151   | 0.0875  | 0.516389 |
| Alad          | chr4:62509168-62519918    | 17.7518  | 17.2262  | -0.0434 | 0.774560 |
| Klh9          | chr4:88718291-88722465    | 48.3336  | 47.6036  | -0.0220 | 0.850201 |
| Plaa          | chr4:94567513-94603244    | 25.5438  | 25.1534  | -0.0222 | 0.834065 |
| Hspb11        | chr4:107253592-107279938  | 2.8897   | 3.8234   | 0.4039  | 0.581744 |
| Lrp8          | chr4:107802260-107876840  | 1.0276   | 1.1135   | 0.1158  | 0.689275 |
| Echdc2        | chr4:108165436-108179308  | 0.4173   | 0.5053   | 0.2761  | 0.685259 |
| Mutyh         | chr4:116807722-116819440  | 4.3094   | 4.6591   | 0.1126  | 0.734167 |
| Gm26330       | chr4:117155185-117155289  | 10.1040  | 8.1994   | -0.3013 | 0.727458 |
| Trappc3       | chr4:126262324-126275883  | 22.5856  | 21.9028  | -0.0443 | 0.835385 |
| Trnau1ap      | chr4:132311762-132329538  | 13.2331  | 12.7716  | -0.0512 | 0.831707 |
| Zfp46         | chr4:136284682-136293942  | 6.7132   | 7.0865   | 0.0781  | 0.619388 |
| Tnfrsf25      | chr4:152115933-152120119  | 32.2894  | 33.8344  | 0.0674  | 0.714340 |
| A430005L14Rik | chr4:153957236-153961925  | 12.7156  | 13.6982  | 0.1074  | 0.715558 |
| Wrap73        | chr4:154142371-154167420  | 7.3430   | 7.7713   | 0.0818  | 0.728107 |
| Pank4         | chr4:154964122-154980938  | 24.4826  | 24.0382  | -0.0264 | 0.811742 |
| Ssu72         | chr4:155704799-155733879  | 35.3797  | 37.0613  | 0.0670  | 0.722024 |
| Mir677        | chr10:128085288-128085360 | 21.9366  | 17.4222  | -0.3324 | 0.778429 |
| Scarf1        | chr11:75513539-75526582   | 0.6500   | 0.5488   | -0.2440 | 0.767173 |
| Gm22711       | chr11:106501242-106501377 | 10.4887  | 8.3697   | -0.3256 | 0.762037 |
| ltgb4         | chr11:115974708-116008412 | 0.4970   | 0.4356   | -0.1903 | 0.800043 |
| Gm5786        | chr12:59081018-59081900   | 0.5453   | 0.7158   | 0.3926  | 0.561610 |
| Hk3           | chr13:55005984-55021385   | 0.6709   | 0.5762   | -0.2194 | 0.760709 |
| Gm17130       | chr5:32005976-32010863    | 1.0150   | 1.2259   | 0.2724  | 0.646963 |
| Gm26845       | chr6:127108388-127110467  | 0.6552   | 0.5274   | -0.3130 | 0.697011 |
| B230216G23Rik | chr6:142413440-142419730  | 0.3505   | 0.4860   | 0.4713  | 0.705532 |
| Zfp296        | chr7:19577286-19580656    | 0.8519   | 0.6459   | -0.3994 | 0.750655 |
| Gm15541       | chr7:27502717-27508122    | 0.3024   | 0.3908   | 0.3696  | 0.686984 |
| Gm4887        | chr7:104821203-104822256  | 0.6490   | 0.4731   | -0.4560 | 0.769478 |
| Gm5915        | chr8:105660333-105660787  | 2.2837   | 1.8382   | -0.3131 | 0.738551 |
| Il20rb        | chr9:100457718-100486788  | 0.7562   | 0.6238   | -0.2778 | 0.802551 |
| Traj52        | chr14:54165315-54165381   | 12.3763  | 9.9378   | -0.3166 | 0.683683 |
| Adcy5         | chr16:35154876-35305737   | 0.3328   | 0.3978   | 0.2573  | 0.686796 |
| 5330426P16Rik | chr16:50727965-50732743   | 4.1648   | 5.1359   | 0.3024  | 0.707125 |
| Snora41       | chr1:63179003-63179135    | 10.0541  | 12.0441  | 0.2605  | 0.526805 |
| Lrp4          | chr2:91457510-91513779    | 0.0832   | 0.0643   | -0.3719 | 0.649767 |
| Gm23731       | chr2:102897959-102898066  | 5.3882   | 7.4581   | 0.4690  | 0.713080 |
| Mir1902       | chr2:104428860-104428940  | 11.9838  | 15.0939  | 0.3329  | 0.670511 |
| Gm14123       | chr2:150606232-150610254  | 0.8500   | 1.0211   | 0.2645  | 0.705528 |
| Gm17608       | chr3:97284907-97297778    | 0.2920   | 0.4365   | 0.5798  | 0.732966 |
| Tmem8b        | chr4:43668970-43692668    | 0.4063   | 0.3522   | -0.2060 | 0.747887 |
| Gm13070       | chr4:149904005-149908149  | 1.6942   | 1.3562   | -0.3211 | 0.749774 |
| Fam101a       | chr5:125003446-125012547  | 0.9243   | 0.7781   | -0.2484 | 0.822279 |
| Klk9          | chr7:43791890-43796756    | 0.8088   | 1.0461   | 0.3711  | 0.735445 |
| Xpnp2         | chrX:48108724-48136981    | 0.3248   | 0.2586   | -0.3291 | 0.802600 |
| Prr22         | chr17:56770275-56772134   | 0.5793   | 0.7603   | 0.3921  | 0.706018 |
| Nrg2          | chr18:36017706-36197380   | 0.1686   | 0.2238   | 0.4085  | 0.582372 |
| Snord73a      | chr3:86138790-86138858    | 13.3624  | 9.6881   | -0.4639 | 0.756371 |
| Car9          | chr4:43506965-43513729    | 0.4958   | 0.6347   | 0.3563  | 0.717764 |
| Map3k6        | chr4:133240817-133252929  | 0.1468   | 0.1062   | -0.4664 | 0.773815 |
| A530017D24Rik | chr11:61864567-61868058   | 5.8376   | 5.5984   | -0.0604 | 0.746980 |
| Twistnb       | chr12:33429623-33439380   | 19.0659  | 20.0640  | 0.0736  | 0.738567 |
| Mplkip        | chr13:17695412-17699105   | 11.9932  | 11.6230  | -0.0452 | 0.811427 |
| Ssr1          | chr13:37971400-37994190   | 20.5389  | 21.3066  | 0.0529  | 0.690509 |
| Coq5          | chr5:115279665-115296972  | 13.2243  | 14.0316  | 0.0855  | 0.730289 |
| Ptcd3         | chr6:71880647-71908762    | 36.3620  | 38.2459  | 0.0729  | 0.798958 |
| Gm26628       | chr6:71961144-71963775    | 6.9927   | 6.6314   | -0.0765 | 0.739302 |
| Gm21982       | chr7:30641000-30664937    | 24.3045  | 23.7720  | -0.0320 | 0.870255 |
| Gm8995        | chr7:106510538-106511671  | 231.2063 | 226.3294 | -0.0308 | 0.893026 |
| Agpat6        | chr8:23172945-23208453    | 21.1182  | 22.0901  | 0.0649  | 0.773353 |
| Sh3rf1        | chr8:61224170-61396072    | 9.7438   | 9.4411   | -0.0455 | 0.862309 |
| Yjefn3        | chr8:69887787-69902712    | 1.4645   | 1.1827   | -0.3083 | 0.730788 |
| Wdr61         | chr9:54714734-54734519    | 12.4338  | 13.0203  | 0.0665  | 0.683402 |
| 1110012L19Rik | chrX:70385876-70389417    | 8.9252   | 9.7469   | 0.1271  | 0.768150 |
| Zfp955b       | chr17:33289648-33303196   | 5.6327   | 6.1032   | 0.1158  | 0.654426 |
| Aars2         | chr17:45506840-45520842   | 5.1842   | 4.9385   | -0.0701 | 0.829444 |
| Tssk2         | chr16:17898636-17900023   | 1.1683   | 0.9515   | -0.2961 | 0.740568 |
| Zdhhc8        | chr16:18220753-18235136   | 4.6185   | 4.8807   | 0.0797  | 0.653624 |
| 2510009E07Rik | chr16:21649044-21694665   | 1.9585   | 1.8472   | -0.0844 | 0.809729 |
| Rps6kb2       | chr19:4156712-4163354     | 12.3361  | 11.8938  | -0.0527 | 0.830389 |

|               |                           |         |         |         |          |
|---------------|---------------------------|---------|---------|---------|----------|
| Rela          | chr19:5637482-5648130     | 28.4407 | 29.8492 | 0.0697  | 0.755558 |
| Ankrd23       | chr1:36530533-36535729    | 6.4742  | 6.1996  | -0.0625 | 0.637969 |
| Sned1         | chr1:93235840-93301065    | 0.8067  | 0.8847  | 0.1332  | 0.744873 |
| Ambra1        | chr2:91730133-91918849    | 19.9844 | 19.6988 | -0.0208 | 0.823219 |
| Bambi-ps1     | chr2:122466934-122467526  | 18.3318 | 19.7242 | 0.1056  | 0.689088 |
| Ptpra         | chr2:130450277-130554026  | 36.8290 | 38.1961 | 0.0526  | 0.644845 |
| Adar          | chr3:89715021-89753446    | 42.9690 | 42.2108 | -0.0257 | 0.892061 |
| Thrap3        | chr4:126164081-126202760  | 27.4666 | 27.1927 | -0.0145 | 0.816844 |
| Myh10         | chr11:68691558-68816632   | 0.3992  | 0.3494  | -0.1923 | 0.786742 |
| Gm24391       | chr6:120524896-120524998  | 5.2336  | 7.2702  | 0.4742  | 0.716850 |
| Cyp2r1        | chr7:114550165-114562972  | 0.4059  | 0.5531  | 0.4463  | 0.716687 |
| Tepp          | chr8:95310565-95326323    | 1.3273  | 1.6059  | 0.2748  | 0.701412 |
| NA            | chr9:57148179-57151937    | 0.8724  | 0.7415  | -0.2345 | 0.792383 |
| Tnk2os        | chr16:32665222-32668197   | 1.2798  | 1.1047  | -0.2123 | 0.777003 |
| Gm17151       | chr10:80766858-80768987   | 2.0305  | 2.6620  | 0.3906  | 0.739959 |
| Gm5432        | chr12:15817002-15888155   | 0.7400  | 0.5825  | -0.3451 | 0.818228 |
| Gm1123        | chr9:99006964-99035690    | 0.5503  | 0.7340  | 0.4156  | 0.735299 |
| Gtpbp1        | chr15:79690894-79721478   | 46.5087 | 45.6635 | -0.0265 | 0.881323 |
| Pcbp2         | chr15:102470631-102500059 | 30.9268 | 32.3012 | 0.0627  | 0.724600 |
| Aida          | chr1:183297059-183324501  | 10.3397 | 10.8930 | 0.0752  | 0.686102 |
| Urgcp         | chr11:5713416-5762376     | 10.8383 | 11.3002 | 0.0602  | 0.672670 |
| Gm15774       | chr7:120872691-120875298  | 0.6632  | 0.7834  | 0.2404  | 0.631679 |
| Nbeal1        | chr1:60180598-60338328    | 5.0367  | 5.2867  | 0.0699  | 0.775149 |
| Acaa2         | chr18:74779196-74806207   | 29.8438 | 31.3253 | 0.0699  | 0.722003 |
| Serp2         | chr14:76532813-76556687   | 3.9132  | 3.5019  | -0.1602 | 0.703170 |
| Gm21981       | chr17:47686738-47694455   | 6.7395  | 6.3902  | -0.0768 | 0.844861 |
| Pnp2          | chr14:50955991-50964749   | 0.8568  | 1.0663  | 0.3157  | 0.736922 |
| Reps1         | chr10:18055860-18125155   | 28.9439 | 28.4864 | -0.0230 | 0.878936 |
| D10Bwg1379e   | chr10:18588010-18743758   | 0.5798  | 0.6421  | 0.1473  | 0.733877 |
| Gm11399       | chr11:3142047-3143363     | 12.3653 | 11.3267 | -0.1266 | 0.747525 |
| 3010026O09Rik | chr11:50174443-50200115   | 3.7720  | 4.0941  | 0.1182  | 0.684428 |
| Mgat4b        | chr11:50210889-50235103   | 2.9335  | 2.7498  | -0.0933 | 0.778802 |
| Tmem11        | chr11:60864451-60879272   | 15.4555 | 16.4714 | 0.0918  | 0.779197 |
| Stard3        | chr11:98358367-98381112   | 11.9745 | 12.6754 | 0.0821  | 0.791480 |
| Cdc27         | chr11:104502744-104550620 | 25.2341 | 24.6875 | -0.0316 | 0.884397 |
| Ern1          | chr11:106394649-106487852 | 2.7638  | 2.6724  | -0.0485 | 0.777059 |
| Arl16         | chr11:120464865-120467607 | 4.1345  | 4.4585  | 0.1089  | 0.695435 |
| Cd7           | chr11:121036746-121039418 | 19.0965 | 18.3843 | -0.0548 | 0.823121 |
| 3110053B16Rik | chr12:20874124-20921262   | 1.9516  | 1.7498  | -0.1575 | 0.812414 |
| lah1          | chr12:21316391-21323605   | 24.7731 | 23.9311 | -0.0499 | 0.767156 |
| Tmed10        | chr12:85340613-85374717   | 16.2756 | 15.8281 | -0.0402 | 0.859872 |
| Pxdc1         | chr13:34627839-34652681   | 0.3091  | 0.4144  | 0.4232  | 0.671479 |
| Cep72         | chr13:74036494-74062285   | 3.2742  | 3.5308  | 0.1088  | 0.719210 |
| Sv2c          | chr13:95959442-96132577   | 0.8584  | 0.9703  | 0.1768  | 0.759233 |
| Phf14         | chr6:11907808-12081197    | 20.1505 | 20.9846 | 0.0585  | 0.705295 |
| Lsm8          | chr6:18848578-18855751    | 14.8403 | 14.3837 | -0.0451 | 0.868335 |
| Creb3l2       | chr6:37327254-37442146    | 1.6634  | 1.7933  | 0.1085  | 0.753597 |
| 4930599N23Rik | chr6:39118407-39148312    | 6.3942  | 6.0623  | -0.0769 | 0.791705 |
| Braf          | chr6:39603236-39725463    | 5.0642  | 5.3109  | 0.0686  | 0.764840 |
| Fxyd4         | chr6:117933728-117937335  | 0.7811  | 0.9675  | 0.3088  | 0.723479 |
| Kras          | chr6:145216698-145250239  | 19.6635 | 19.2126 | -0.0335 | 0.886629 |
| Pla2g4c       | chr7:13324654-13360672    | 0.3558  | 0.4358  | 0.2927  | 0.705867 |
| Numbl         | chr7:27258432-27282144    | 0.5134  | 0.5708  | 0.1528  | 0.667052 |
| Snord34       | chr7:45126600-45126670    | 70.3109 | 65.1011 | -0.1111 | 0.761354 |
| 9130023H24Rik | chr7:128234450-128238031  | 7.6266  | 8.0848  | 0.0842  | 0.756265 |
| lkzf5         | chr7:131388651-131410521  | 5.7508  | 5.5614  | -0.0483 | 0.810891 |
| Abhd13        | chr8:9977706-9992155      | 17.5571 | 17.1931 | -0.0302 | 0.877338 |
| Smarca5       | chr8:80698506-80739497    | 19.7279 | 19.3627 | -0.0270 | 0.883752 |
| Gpt2          | chr8:85492575-85527560    | 0.1658  | 0.2083  | 0.3289  | 0.736507 |
| Ldhd          | chr8:111623784-111630374  | 1.6887  | 1.8810  | 0.1556  | 0.773610 |
| 4933433G15Rik | chr9:75410183-75417709    | 1.4553  | 1.2993  | -0.1636 | 0.776888 |
| lck           | chr9:78109191-78172107    | 1.6494  | 1.7541  | 0.0888  | 0.683107 |
| 1190002N15Rik | chr9:94517863-94538081    | 12.7175 | 12.3545 | -0.0418 | 0.840807 |
| Tgm4          | chr9:123034738-123067561  | 1.7712  | 1.6462  | -0.1055 | 0.807502 |
| Ap1s2         | chrX:163909016-163933666  | 7.5166  | 7.3414  | -0.0340 | 0.792114 |
| 2410089E03Rik | chr15:8169105-8271158     | 5.6062  | 5.5008  | -0.0274 | 0.784770 |
| Mtbp          | chr15:55557407-55626423   | 9.7558  | 9.5249  | -0.0346 | 0.818360 |
| Der1          | chr15:57869501-57892418   | 34.1033 | 35.3479 | 0.0517  | 0.584946 |
| Wisp1         | chr15:66891319-66923201   | 1.4169  | 1.5587  | 0.1376  | 0.797441 |
| NA            | chr15:75979871-75982285   | 6.9237  | 7.3524  | 0.0867  | 0.572295 |
| Zfp647        | chr15:76910850-76918010   | 1.1143  | 0.9747  | -0.1931 | 0.682565 |

|               |                          |          |          |         |          |
|---------------|--------------------------|----------|----------|---------|----------|
| Syngn1        | chr15:80091333-80119501  | 0.2421   | 0.1972   | -0.2959 | 0.745414 |
| Oxnad1        | chr14:32085373-32103202  | 3.5435   | 3.3825   | -0.0671 | 0.831556 |
| Tmem55b       | chr14:50926069-50930856  | 20.5874  | 21.4871  | 0.0617  | 0.733838 |
| Gzmc          | chr14:56231400-56234656  | 3.6917   | 3.3380   | -0.1453 | 0.779470 |
| Phf11a        | chr14:59276912-59297522  | 8.5011   | 9.2481   | 0.1215  | 0.800846 |
| Kbtbd7        | chr14:79426510-79431039  | 3.3634   | 3.6076   | 0.1012  | 0.767516 |
| NA            | chr17:6451887-6477102    | 6.0724   | 6.8658   | 0.1772  | 0.760270 |
| Zfp758        | chr17:22361452-22377281  | 15.1662  | 14.7399  | -0.0411 | 0.852341 |
| Zfp955a       | chr17:33241518-33255040  | 8.6810   | 9.3178   | 0.1021  | 0.713219 |
| Prepl         | chr17:85063476-85090267  | 4.7052   | 4.4941   | -0.0662 | 0.838688 |
| Lztr1         | chr16:17508687-17526333  | 17.0053  | 16.6910  | -0.0269 | 0.857379 |
| Gm16314       | chr16:18498900-18501658  | 3.4773   | 3.1153   | -0.1586 | 0.776528 |
| Lsg1          | chr16:30560493-30587592  | 13.4876  | 13.1835  | -0.0329 | 0.849127 |
| Morc3         | chr16:93832120-93876072  | 47.5743  | 49.3668  | 0.0534  | 0.719889 |
| Gstp1         | chr19:4035410-4037912    | 16.0963  | 15.2321  | -0.0796 | 0.792435 |
| Rom1          | chr19:8927381-8929356    | 11.2032  | 12.0821  | 0.1090  | 0.822032 |
| Ppapdc2       | chr19:28963919-28966798  | 8.7938   | 8.3825   | -0.0691 | 0.863528 |
| Exoc6         | chr19:37550417-37683245  | 36.8678  | 36.3041  | -0.0222 | 0.789446 |
| Rpl13a-ps1    | chr19:50030123-50030735  | 2.8412   | 2.3990   | -0.2441 | 0.751716 |
| Gm25238       | chr19:60580528-60580617  | 37.0481  | 33.3842  | -0.1502 | 0.768008 |
| Spag16        | chr1:69826987-70725132   | 0.3517   | 0.4057   | 0.2061  | 0.647338 |
| Dis3l2        | chr1:86703803-87050097   | 14.8384  | 15.5103  | 0.0639  | 0.673834 |
| Zranb3        | chr1:127954183-128103047 | 1.8797   | 2.0199   | 0.1038  | 0.676066 |
| Kifap3        | chr1:163779582-163917109 | 2.3953   | 2.6100   | 0.1238  | 0.741553 |
| Pydc4         | chr1:173566283-173599274 | 25.1250  | 27.2563  | 0.1175  | 0.773423 |
| Cox20         | chr1:178319129-178322693 | 90.3162  | 88.4507  | -0.0301 | 0.863018 |
| Ss18          | chr18:14624197-14682914  | 28.0756  | 29.0953  | 0.0515  | 0.574732 |
| Tmco6         | chr18:36735067-36742391  | 19.9130  | 20.7956  | 0.0626  | 0.493391 |
| Gm10524       | chr18:82692948-82706174  | 1.8506   | 2.0674   | 0.1599  | 0.658825 |
| Gm13610       | chr2:32232781-32236382   | 9.0242   | 8.4958   | -0.0870 | 0.771172 |
| Dpm2          | chr2:32570857-32573579   | 17.6767  | 17.2671  | -0.0338 | 0.702675 |
| Hnrnpa3       | chr2:75659260-75669407   | 4.0980   | 3.9355   | -0.0584 | 0.810193 |
| Ube2e3        | chr2:78868123-78921293   | 3.7554   | 4.0033   | 0.0922  | 0.704852 |
| Dusp19        | chr2:80617044-80632361   | 4.7732   | 4.5105   | -0.0817 | 0.823063 |
| Zdhhc5        | chr2:84687969-84715180   | 23.9082  | 23.5053  | -0.0245 | 0.857078 |
| Rpl30-ps3     | chr2:90747615-90747963   | 9.9497   | 9.0992   | -0.1289 | 0.599962 |
| Gm14091       | chr2:118829873-118834122 | 5.7860   | 6.3778   | 0.1405  | 0.609585 |
| Rtf1          | chr2:119675067-119735407 | 16.4985  | 17.1055  | 0.0521  | 0.556602 |
| Rnf24         | chr2:131298063-131352892 | 3.8514   | 3.7140   | -0.0524 | 0.841397 |
| Uqcc1         | chr2:155846893-155930310 | 5.1646   | 5.0091   | -0.0441 | 0.786051 |
| Fam65c        | chr2:167980163-168010618 | 0.5824   | 0.6573   | 0.1745  | 0.527798 |
| Mrgbp         | chr2:180581303-180586304 | 20.3596  | 19.9972  | -0.0259 | 0.787664 |
| Mgarp         | chr3:51388414-51396738   | 0.7369   | 0.6321   | -0.2212 | 0.719970 |
| Rnu73b        | chr3:86140617-86140688   | 32.8865  | 29.4388  | -0.1598 | 0.649057 |
| Slc27a3       | chr3:90385238-90389938   | 0.8594   | 0.9892   | 0.2031  | 0.798877 |
| Gm128         | chr3:95236919-95241598   | 2.5824   | 2.4033   | -0.1037 | 0.582177 |
| Nras          | chr3:103058338-103067914 | 34.6437  | 35.9911  | 0.0550  | 0.742975 |
| Ankrd13c      | chr3:157947413-158006833 | 21.7608  | 21.2564  | -0.0338 | 0.843143 |
| Gm11802       | chr4:6688168-6704160     | 7.7719   | 8.5048   | 0.1300  | 0.426051 |
| Map3k7        | chr4:31964096-32023467   | 19.6295  | 19.3254  | -0.0225 | 0.863785 |
| Galnt12       | chr4:47091908-47123070   | 15.8299  | 16.6599  | 0.0737  | 0.692709 |
| Gm13139       | chr4:147132037-147180579 | 0.8698   | 1.0057   | 0.2094  | 0.775797 |
| Tprgl         | chr4:154157484-154160666 | 57.2985  | 56.2462  | -0.0267 | 0.878618 |
| Phospho1      | chr11:95824498-95832140  | 1.9768   | 2.3419   | 0.2445  | 0.783212 |
| Gm20563       | chr13:62006665-62006941  | 4.1112   | 3.2293   | -0.3483 | 0.733829 |
| 4831440E17Rik | chr5:25499066-25501541   | 1.1124   | 1.4184   | 0.3505  | 0.753247 |
| Gm16288       | chr5:30240081-30240448   | 1.9322   | 2.4805   | 0.3604  | 0.634413 |
| Gm22728       | chr5:92056063-92056192   | 5.2969   | 3.9724   | -0.4152 | 0.785718 |
| Abhd11os      | chr5:135012113-135013253 | 3.4602   | 2.9925   | -0.2095 | 0.809363 |
| 9530036M11Rik | chr6:54146886-54150937   | 0.4317   | 0.3427   | -0.3332 | 0.772413 |
| Tub           | chr7:109010824-109034460 | 0.4660   | 0.5594   | 0.2634  | 0.787982 |
| Ctbp2         | chr7:132987562-133124354 | 0.1813   | 0.1473   | -0.2994 | 0.668285 |
| Ctdspl        | chr9:118926452-119043998 | 0.6224   | 0.7398   | 0.2493  | 0.735557 |
| Fam19a3       | chr3:104767405-104781840 | 0.6578   | 0.5890   | -0.1595 | 0.777230 |
| Trav8-1       | chr14:53469755-53470231  | 3.9092   | 3.1569   | -0.3084 | 0.811706 |
| Prr18         | chr17:8340405-8344112    | 0.2176   | 0.2803   | 0.3655  | 0.735188 |
| BC023105      | chr18:60441752-60442983  | 0.7994   | 0.6084   | -0.3941 | 0.812625 |
| Gm16372       | chr12:24493206-24493656  | 4.2772   | 4.8804   | 0.1903  | 0.470187 |
| Mccc2         | chr13:99948532-100015639 | 5.6807   | 5.3981   | -0.0736 | 0.840570 |
| Gm15842       | chr5:122302421-122303039 | 5.4678   | 4.6288   | -0.2403 | 0.824027 |
| Gimap1        | chr6:48718606-48752600   | 102.0604 | 105.5577 | 0.0486  | 0.683575 |

|               |                           |          |          |         |          |
|---------------|---------------------------|----------|----------|---------|----------|
| Nudcd1        | chr15:44375226-44428307   | 10.2035  | 10.7948  | 0.0813  | 0.767780 |
| 1110038B12Rik | chr17:34950237-34952471   | 14.2952  | 13.8797  | -0.0426 | 0.800015 |
| Lcmt2         | chr2:121128306-121140698  | 5.2554   | 5.5735   | 0.0848  | 0.697205 |
| Ang           | chr14:51091076-51102007   | 0.9863   | 1.2109   | 0.2961  | 0.655350 |
| R3hdm2        | chr10:127380326-127499384 | 3.7195   | 3.9755   | 0.0960  | 0.813614 |
| Dixdc1        | chr9:50662751-50739517    | 0.3027   | 0.2652   | -0.1909 | 0.809886 |
| Mta3          | chr17:83706162-83821516   | 15.9483  | 16.5501  | 0.0534  | 0.606422 |
| Tnks1bp1      | chr2:85048021-85073048    | 8.5339   | 8.9409   | 0.0672  | 0.758885 |
| Eif3m         | chr2:104999655-105017080  | 45.4559  | 44.3599  | -0.0352 | 0.891743 |
| 1810062G17Rik | chr3:36475936-36482299    | 1.4725   | 1.1957   | -0.3004 | 0.735013 |
| Upk1a         | chr7:30603091-30612734    | 0.5326   | 0.3968   | -0.4247 | 0.794071 |
| AW209491      | chr13:14630244-14638202   | 5.3647   | 5.8092   | 0.1148  | 0.733174 |
| G2e3          | chr12:51348060-51376986   | 11.9410  | 12.4484  | 0.0600  | 0.771627 |
| Fbxo27        | chr7:28692848-28699338    | 1.5205   | 1.3831   | -0.1367 | 0.794761 |
| Ccdc114       | chr7:45924071-45948956    | 0.2819   | 0.3258   | 0.2085  | 0.609232 |
| Mef2a         | chr7:67231162-67372858    | 11.7037  | 11.5162  | -0.0233 | 0.799778 |
| Rab11fip1     | chr8:27138772-27174646    | 13.8283  | 13.5565  | -0.0286 | 0.884977 |
| Gm10643       | chr8:84063560-84065137    | 5.2304   | 4.8623   | -0.1053 | 0.832510 |
| Msantd2       | chr9:37489320-37524148    | 9.2371   | 9.8679   | 0.0953  | 0.795256 |
| Mospd1        | chrX:53344597-53370502    | 4.9664   | 5.3672   | 0.1120  | 0.759786 |
| Rnf219        | chr14:104477533-104522666 | 8.4049   | 8.1247   | -0.0489 | 0.852874 |
| Zfp119a       | chr17:55865203-55878862   | 9.9522   | 9.4872   | -0.0690 | 0.849655 |
| March7        | chr2:60209886-60250676    | 30.7065  | 31.7819  | 0.0497  | 0.723473 |
| Gm5963        | chr16:35573316-35573556   | 2.8933   | 2.2043   | -0.3924 | 0.736898 |
| Mtrf1l        | chr10:5811886-5823910     | 7.9699   | 7.7279   | -0.0445 | 0.784122 |
| Zbtb6         | chr2:37425499-37443171    | 14.3931  | 14.0263  | -0.0372 | 0.882654 |
| Hp1bp3        | chr4:138216295-138244683  | 46.3244  | 47.7217  | 0.0429  | 0.492112 |
| Mif           | chr10:75859352-75860250   | 44.1594  | 47.6172  | 0.1088  | 0.827726 |
| Galc          | chr12:98202303-98259459   | 0.6953   | 0.6215   | -0.1619 | 0.731852 |
| H2afy         | chr13:56073618-56136361   | 42.7752  | 42.4138  | -0.0122 | 0.860527 |
| Polr3g        | chr13:81673842-81711013   | 6.1546   | 5.9434   | -0.0504 | 0.838147 |
| Rsb1l         | chr5:20893027-20951822    | 18.4849  | 18.1187  | -0.0289 | 0.891741 |
| Slc5a6        | chr5:31036035-31048924    | 3.6262   | 3.4571   | -0.0689 | 0.805575 |
| Gm15446       | chr5:109923399-109943936  | 5.4774   | 5.8001   | 0.0826  | 0.730970 |
| lqcd          | chr5:120589015-120607114  | 1.1698   | 1.3645   | 0.2220  | 0.772412 |
| 6330418K02Rik | chr5:138264042-138266661  | 5.3883   | 5.8223   | 0.1118  | 0.654630 |
| Igflr1        | chr7:30565426-30567962    | 46.7888  | 45.8642  | -0.0288 | 0.841720 |
| Zfp715        | chr7:43296196-43313294    | 14.3958  | 14.0846  | -0.0315 | 0.866926 |
| Abhd17c       | chr7:84109355-84151893    | 16.9269  | 16.3511  | -0.0499 | 0.864089 |
| Tmem80        | chr7:141327738-141337156  | 6.1073   | 5.8742   | -0.0561 | 0.837337 |
| Yipf2         | chr9:21588708-21592831    | 17.7198  | 18.5174  | 0.0635  | 0.534296 |
| Cnot10        | chr9:114585877-114640200  | 25.2672  | 26.2333  | 0.0541  | 0.609562 |
| Mir1898       | chr15:12171491-12171574   | 14.7229  | 17.1640  | 0.2213  | 0.164119 |
| Top2b         | chr14:16365178-16430787   | 110.2038 | 108.8482 | -0.0179 | 0.902951 |
| BC003965      | chr17:25184560-25187661   | 13.6373  | 13.1215  | -0.0556 | 0.875781 |
| Srf           | chr17:46546838-46556162   | 29.2841  | 28.7875  | -0.0247 | 0.886056 |
| Ubr2          | chr17:46928291-47010532   | 25.1254  | 24.7906  | -0.0194 | 0.874841 |
| Atl2          | chr17:79848391-79896123   | 9.4133   | 9.9454   | 0.0793  | 0.788012 |
| Cyp20a1       | chr1:60343322-60388060    | 10.6152  | 11.2372  | 0.0821  | 0.757492 |
| Rab3gap1      | chr1:127868772-127943868  | 23.6035  | 24.4585  | 0.0513  | 0.701170 |
| Gas5          | chr1:161034421-161038539  | 105.8425 | 110.4642 | 0.0617  | 0.827273 |
| Rprd1a        | chr18:24484961-24530204   | 4.6169   | 4.4404   | -0.0562 | 0.822408 |
| Orm3          | chr4:63356161-63359511    | 1.8527   | 1.6070   | -0.2053 | 0.672398 |
| Gm10306       | chr4:94556545-94557078    | 2.9770   | 2.4974   | -0.2534 | 0.804741 |
| Fth-ps2       | chr6:39653449-39653965    | 1.3671   | 1.7427   | 0.3502  | 0.688840 |
| Sfxn5         | chr6:85213050-85333422    | 0.3342   | 0.3906   | 0.2248  | 0.732931 |
| Prss36        | chr7:127932637-127946725  | 0.4226   | 0.3490   | -0.2757 | 0.744899 |
| Tln2          | chr9:67217086-67559703    | 0.0631   | 0.0838   | 0.4090  | 0.743631 |
| Gm4987        | chrX:46455886-46456294    | 4.2555   | 5.2185   | 0.2943  | 0.772082 |
| Rpsa-ps12     | chr4:149142496-149143388  | 0.6434   | 0.7996   | 0.3134  | 0.569892 |
| Gm13854       | chr6:33375110-33377446    | 0.5356   | 0.7212   | 0.4293  | 0.813751 |
| Gm16175       | chr7:19809608-19811872    | 7.9018   | 6.7928   | -0.2182 | 0.833729 |
| Card10        | chr15:78775137-78803042   | 0.1207   | 0.1576   | 0.3853  | 0.733996 |
| Mrps18a       | chr17:46110985-46128910   | 8.0129   | 8.4243   | 0.0722  | 0.715911 |
| Cpped1        | chr16:11803720-11909445   | 2.3630   | 2.5235   | 0.0948  | 0.717878 |
| Taok1         | chr11:77529161-77607815   | 26.1062  | 25.7891  | -0.0176 | 0.877777 |
| Akap1         | chr11:88830791-88864586   | 2.7162   | 2.5622   | -0.0842 | 0.829172 |
| Sap30bp       | chr11:115933281-115966725 | 18.7306  | 18.4281  | -0.0235 | 0.780929 |
| Asxl2         | chr12:3426856-3506852     | 17.9711  | 17.7535  | -0.0176 | 0.886930 |
| Rinl          | chr7:28788968-28798963    | 74.2843  | 77.3915  | 0.0591  | 0.787521 |
| Gm26827       | chr7:66109514-66173121    | 11.6067  | 12.2178  | 0.0740  | 0.637957 |

|               |                           |          |          |         |          |
|---------------|---------------------------|----------|----------|---------|----------|
| Dnmt1         | chr9:20907205-20959888    | 74.7182  | 73.7523  | -0.0188 | 0.901963 |
| Atr           | chr9:95857596-95951644    | 21.4458  | 21.1219  | -0.0220 | 0.880616 |
| Gm15938       | chr15:5175084-5185723     | 2.4216   | 2.0297   | -0.2547 | 0.761048 |
| 4732491K20Rik | chr17:12318884-12327250   | 0.3156   | 0.3894   | 0.3032  | 0.735964 |
| Glo1          | chr17:30592865-30612659   | 12.5353  | 13.3097  | 0.0865  | 0.785085 |
| Dusp28        | chr1:92906988-92908620    | 6.0141   | 6.4990   | 0.1119  | 0.728680 |
| Ada           | chr2:163726583-163750239  | 5.8565   | 6.3128   | 0.1082  | 0.749129 |
| Dclre1b       | chr3:103800604-103809444  | 3.3842   | 3.5549   | 0.0710  | 0.709476 |
| Tmem67        | chr4:12039354-12090020    | 0.8861   | 0.9712   | 0.1324  | 0.818699 |
| Sync          | chr4:129287616-129308559  | 1.5460   | 1.7183   | 0.1524  | 0.707564 |
| Gm17231       | chr9:5777864-57834295     | 1.5719   | 1.8957   | 0.2702  | 0.726761 |
| Gm7823        | chrX:133093939-133095562  | 2.2490   | 2.0100   | -0.1621 | 0.823051 |
| Gm13092       | chr4:150315176-150315515  | 1.9425   | 1.4738   | -0.3984 | 0.728431 |
| Gm4895        | chr10:22153279-22154416   | 1.3772   | 1.2319   | -0.1607 | 0.810553 |
| Gm26740       | chr10:22187012-22302835   | 40.2116  | 39.5407  | -0.0243 | 0.910710 |
| C920009B18Rik | chr10:22306701-22321765   | 5.0040   | 5.2675   | 0.0740  | 0.785963 |
| L3mbtl3       | chr10:26274467-26375185   | 16.5144  | 17.1593  | 0.0553  | 0.800397 |
| Fyn           | chr10:39368854-39565381   | 114.7588 | 114.0834 | -0.0085 | 0.901870 |
| Prep          | chr10:45067205-45158997   | 20.8614  | 20.5261  | -0.0234 | 0.917227 |
| Cep85l        | chr10:53278080-53379851   | 9.3977   | 9.8242   | 0.0640  | 0.650973 |
| Psap          | chr10:60277626-60302597   | 123.5769 | 122.6205 | -0.0112 | 0.905924 |
| Aifm2         | chr10:61715262-61739260   | 0.8595   | 0.9436   | 0.1346  | 0.801448 |
| Snrpd3        | chr10:75518041-75535440   | 22.8676  | 21.8393  | -0.0664 | 0.882541 |
| Ggt1          | chr10:75561603-75586200   | 0.9759   | 1.0986   | 0.1707  | 0.805232 |
| R3hdm4        | chr10:79910052-79917006   | 27.0839  | 28.4207  | 0.0695  | 0.783959 |
| Kiss1r        | chr10:79916970-79922273   | 0.6986   | 0.6114   | -0.1923 | 0.837182 |
| Mob3a         | chr10:80685255-80701820   | 95.5152  | 98.7993  | 0.0488  | 0.752732 |
| Slc39a3       | chr10:81028537-81037426   | 6.9036   | 7.2493   | 0.0705  | 0.757701 |
| Dapk3         | chr10:81183006-81193197   | 19.9751  | 19.3852  | -0.0432 | 0.880813 |
| Smim24        | chr10:81393050-81395392   | 3.5029   | 3.9008   | 0.1552  | 0.719261 |
| Prdm4         | chr10:85891969-85916945   | 18.4840  | 19.0659  | 0.0447  | 0.593037 |
| Gm15344       | chr10:86692118-86693095   | 59.9169  | 58.3091  | -0.0392 | 0.830775 |
| Nedd1         | chr10:92684745-92722420   | 14.6471  | 15.2106  | 0.0545  | 0.631895 |
| Ndufa12       | chr10:94198954-94221443   | 19.7475  | 19.1047  | -0.0477 | 0.843830 |
| Osbp18        | chr10:111164801-111297247 | 45.0765  | 44.6838  | -0.0126 | 0.918882 |
| Nup107        | chr10:117750623-117792705 | 26.0231  | 26.9567  | 0.0509  | 0.752026 |
| Cdk4          | chr10:127063533-127067920 | 54.6535  | 56.7176  | 0.0535  | 0.780013 |
| Os9           | chr10:127094258-127121160 | 59.7509  | 61.9591  | 0.0524  | 0.744936 |
| Pip4k2c       | chr10:127197066-127211622 | 20.0322  | 19.7716  | -0.0189 | 0.868640 |
| Ddit3         | chr10:127290773-127296288 | 13.4772  | 14.2165  | 0.0770  | 0.763284 |
| Zc3h10        | chr10:128541962-128547774 | 7.6364   | 7.9924   | 0.0657  | 0.652425 |
| Tmem198b      | chr10:128800035-128804370 | 1.9435   | 1.8184   | -0.0959 | 0.790406 |
| Nipsnap1      | chr11:4873950-4894200     | 12.3080  | 12.0938  | -0.0253 | 0.823045 |
| Gm22123       | chr11:6472224-6472277     | 172.1323 | 163.4710 | -0.0745 | 0.829652 |
| Gm11973       | chr11:6475424-6493535     | 7.3730   | 7.8886   | 0.0975  | 0.767435 |
| Gm22457       | chr11:6528032-6528165     | 21.6276  | 19.9166  | -0.1189 | 0.811832 |
| Ahsa2         | chr11:23487881-23498030   | 20.8173  | 20.5117  | -0.0213 | 0.885288 |
| 0610010F05Rik | chr11:23564960-23633639   | 3.0964   | 2.9689   | -0.0607 | 0.838229 |
| Nprl3         | chr11:32225627-32267707   | 7.6090   | 7.5060   | -0.0197 | 0.889417 |
| Gm24157       | chr11:52099057-52099153   | 99.2785  | 107.2862 | 0.1119  | 0.785207 |
| Skp1a         | chr11:52231994-52246858   | 67.6820  | 70.3248  | 0.0553  | 0.831714 |
| Hs3st3b1      | chr11:63885791-63922290   | 1.8565   | 1.7493   | -0.0858 | 0.869683 |
| Gas7          | chr11:67455436-67688990   | 0.1095   | 0.1346   | 0.2973  | 0.791101 |
| 2310047M10Rik | chr11:69059774-69061576   | 11.4108  | 12.0289  | 0.0761  | 0.784780 |
| Mpdu1         | chr11:69656696-69662642   | 21.5691  | 22.4249  | 0.0561  | 0.642561 |
| Gm24029       | chr11:69667833-69667976   | 12.7948  | 15.1008  | 0.2391  | 0.723113 |
| Psmb6         | chr11:70525366-70527858   | 69.1966  | 71.6044  | 0.0493  | 0.671322 |
| Gm19967       | chr11:70864659-70872754   | 0.8787   | 0.7836   | -0.1652 | 0.632496 |
| C1qbp         | chr11:70977835-70983026   | 18.4487  | 18.0979  | -0.0277 | 0.902688 |
| NA            | chr11:76179670-76214816   | 8.1564   | 8.5060   | 0.0605  | 0.704472 |
| Myo18a        | chr11:77763245-77865980   | 10.9882  | 10.8506  | -0.0182 | 0.915029 |
| Pipox         | chr11:77880614-77894096   | 0.3901   | 0.3273   | -0.2535 | 0.771406 |
| Suz12         | chr11:79993105-80034123   | 41.0609  | 40.5581  | -0.0178 | 0.914602 |
| Ccl1          | chr11:82176656-82305690   | 0.7404   | 0.8594   | 0.2150  | 0.796908 |
| Ppm1e         | chr11:87226905-87359023   | 0.1163   | 0.1439   | 0.3068  | 0.771607 |
| Srsf1         | chr11:88047372-88053755   | 147.7000 | 145.6008 | -0.0207 | 0.912798 |
| Coil          | chr11:88970251-88991613   | 6.6578   | 6.5050   | -0.0335 | 0.831859 |
| Gm20390       | chr11:93949818-93968293   | 111.0227 | 108.3698 | -0.0349 | 0.917048 |
| Cbx1          | chr11:96789126-96808640   | 19.0679  | 19.7726  | 0.0524  | 0.795143 |
| Zbbp2         | chr11:98551096-98558665   | 2.4299   | 2.2808   | -0.0914 | 0.833342 |
| Klhl11        | chr11:100462613-100472741 | 15.3414  | 16.0404  | 0.0643  | 0.686564 |

|               |                           |         |         |         |          |
|---------------|---------------------------|---------|---------|---------|----------|
| Cntd1         | chr11:101279011-101296317 | 18.2215 | 17.8878 | -0.0267 | 0.898748 |
| Becn1         | chr11:101285951-101302286 | 24.2578 | 25.2083 | 0.0554  | 0.791945 |
| Tmub2         | chr11:102284930-102289237 | 16.9882 | 17.8032 | 0.0676  | 0.746902 |
| Kcnh6         | chr11:106008123-106034549 | 0.5703  | 0.6773  | 0.2481  | 0.776457 |
| Gm11646       | chr11:106051150-106051852 | 13.4035 | 14.5152 | 0.1149  | 0.764416 |
| Strada        | chr11:106163329-106202168 | 8.1589  | 8.5182  | 0.0622  | 0.675193 |
| Cep95         | chr11:106789251-106819930 | 15.7241 | 16.3146 | 0.0532  | 0.723846 |
| Nat9          | chr11:115182831-115187859 | 3.5364  | 3.3812  | -0.0647 | 0.847555 |
| Cep131        | chr11:120064429-120086827 | 1.9867  | 1.8793  | -0.0802 | 0.851825 |
| Gm23419       | chr11:120346735-120346819 | 52.2463 | 47.6644 | -0.1324 | 0.839065 |
| Rab10         | chr12:3247429-3309969     | 65.2292 | 66.9862 | 0.0383  | 0.630729 |
| Ttc32         | chr12:9029996-9036394     | 5.8212  | 6.2671  | 0.1065  | 0.795588 |
| Taf1b         | chr12:24498580-24558571   | 29.1197 | 30.2855 | 0.0566  | 0.688126 |
| Trappc12      | chr12:28690628-28750453   | 19.9074 | 20.5971 | 0.0491  | 0.592977 |
| Tssc1         | chr12:28751827-28867491   | 24.9045 | 24.4780 | -0.0249 | 0.839622 |
| Bcap29        | chr12:31595353-31634658   | 10.6437 | 11.2772 | 0.0834  | 0.759887 |
| Scin          | chr12:40059768-40134228   | 2.3380  | 2.5213  | 0.1089  | 0.821131 |
| Gm17056       | chr12:40198655-40201105   | 0.4482  | 0.5277  | 0.2357  | 0.708519 |
| Strn3         | chr12:51608540-51691914   | 24.1309 | 24.8977 | 0.0451  | 0.688314 |
| Dtd2          | chr12:51988311-52006501   | 3.1803  | 3.3824  | 0.0889  | 0.669716 |
| Gm20403       | chr12:54986157-54986529   | 1.7566  | 1.4721  | -0.2549 | 0.670585 |
| Gemin2        | chr12:59013392-59028470   | 7.7264  | 8.1659  | 0.0798  | 0.830075 |
| Rpl36al       | chr12:69182730-69184083   | 12.0558 | 12.6844 | 0.0733  | 0.664590 |
| L2hgdh        | chr12:69690435-69724874   | 3.0805  | 2.9413  | -0.0667 | 0.848280 |
| Ccdc175       | chr12:72101291-72185029   | 0.5299  | 0.4553  | -0.2188 | 0.784773 |
| Fntb          | chr12:76765588-76921412   | 6.6052  | 6.4019  | -0.0451 | 0.841038 |
| Max           | chr12:76937268-76962248   | 48.8012 | 48.3071 | -0.0147 | 0.864590 |
| Dcaf5         | chr12:80335846-80436601   | 27.3421 | 27.0088 | -0.0177 | 0.861876 |
| Dlst          | chr12:85110832-85134091   | 46.0901 | 47.6928 | 0.0493  | 0.746446 |
| Mlh3          | chr12:85234528-85270591   | 7.7393  | 7.5862  | -0.0288 | 0.840145 |
| Angel1        | chr12:86700501-86726460   | 1.8058  | 1.6968  | -0.0899 | 0.802591 |
| Tdp1          | chr12:99884516-99955219   | 3.1096  | 3.2932  | 0.0828  | 0.826114 |
| Ccdc85c       | chr12:108206344-108275417 | 1.3097  | 1.1441  | -0.1951 | 0.822311 |
| Zfp839        | chr12:110850278-110869998 | 2.6478  | 2.5249  | -0.0686 | 0.861834 |
| Crip2         | chr12:113140235-113145504 | 1.1768  | 1.3685  | 0.2177  | 0.753748 |
| Cdca7l        | chr12:117804288-117878706 | 22.3576 | 23.1881 | 0.0526  | 0.659810 |
| Rala          | chr13:17880574-17944239   | 14.7339 | 14.4114 | -0.0319 | 0.905260 |
| 4930558J22Rik | chr13:23756202-23757620   | 4.1045  | 3.8205  | -0.1035 | 0.807953 |
| Tdp2          | chr13:24831678-24842153   | 25.2941 | 26.4090 | 0.0622  | 0.713495 |
| Sirt5         | chr13:43370709-43395202   | 12.1364 | 11.6653 | -0.0571 | 0.863333 |
| Jarid2        | chr13:44729473-44921643   | 15.9037 | 16.4466 | 0.0484  | 0.685229 |
| Fam120a       | chr13:48879218-48968017   | 79.3614 | 78.5855 | -0.0142 | 0.898557 |
| Higd2a        | chr13:54590206-54591158   | 49.4579 | 48.0997 | -0.0402 | 0.891438 |
| B4galt7       | chr13:55599895-55610443   | 10.7921 | 10.4620 | -0.0448 | 0.853196 |
| Fbxl21        | chr13:56522471-56537898   | 0.2830  | 0.2470  | -0.1961 | 0.840495 |
| Hnrnpa0       | chr13:58125878-58128556   | 52.4953 | 51.7135 | -0.0216 | 0.914877 |
| Zcchc6        | chr13:59771878-59823147   | 45.5369 | 46.8863 | 0.0421  | 0.744438 |
| Mterf3        | chr13:66906967-66933088   | 11.1682 | 11.0123 | -0.0203 | 0.870611 |
| 4930525G20Rik | chr13:67796593-67830985   | 0.8759  | 0.7808  | -0.1658 | 0.841916 |
| Mrpl36        | chr13:73331008-73332175   | 37.4447 | 36.3766 | -0.0418 | 0.865584 |
| Clptm1l       | chr13:73604001-73620639   | 79.0890 | 78.3249 | -0.0140 | 0.927324 |
| Mrps27        | chr13:99344785-99415561   | 8.9956  | 8.6428  | -0.0577 | 0.833173 |
| Mocs2         | chr13:114818243-114829006 | 11.4853 | 11.2713 | -0.0271 | 0.794927 |
| Krit1         | chr5:3803164-3844515      | 22.0118 | 21.7934 | -0.0144 | 0.914944 |
| Pmpcb         | chr5:21737140-21757152    | 17.3145 | 17.1090 | -0.0172 | 0.909791 |
| Nupl2         | chr5:24164962-24184013    | 3.0981  | 2.9239  | -0.0835 | 0.846299 |
| 2900005J15Rik | chr5:25100982-25110109    | 1.6907  | 1.5821  | -0.0958 | 0.844738 |
| Whsc1         | chr5:33820724-33897975    | 12.4481 | 12.8484 | 0.0457  | 0.742836 |
| Mxd4          | chr5:34173886-34187720    | 65.4055 | 67.7395 | 0.0506  | 0.815901 |
| Sh3bp2        | chr5:34525837-34563638    | 6.8304  | 6.6621  | -0.0360 | 0.857581 |
| Cpeb2         | chr5:43233462-43289724    | 1.9889  | 1.8956  | -0.0693 | 0.867637 |
| Lrrc66        | chr5:73606642-73632505    | 0.8669  | 0.9705  | 0.1629  | 0.769657 |
| Lnx1          | chr5:74592445-74702911    | 2.8431  | 2.7371  | -0.0548 | 0.861337 |
| Srp72         | chr5:76974682-76999937    | 28.8924 | 29.7884 | 0.0441  | 0.706542 |
| Utp3          | chr5:88554482-88556083    | 44.8235 | 43.9825 | -0.0273 | 0.899818 |
| Rufy3         | chr5:88583573-88642671    | 1.9977  | 2.1568  | 0.1105  | 0.821300 |
| Fam175a       | chr5:100805191-100820965  | 8.6311  | 9.0601  | 0.0700  | 0.728838 |
| Wdfy3         | chr5:101832955-102069921  | 0.0585  | 0.0431  | -0.4420 | 0.803821 |
| Fam69a        | chr5:107908052-107987085  | 16.1736 | 16.7931 | 0.0542  | 0.759416 |
| Mtf2          | chr5:108065673-108109004  | 25.6868 | 26.5247 | 0.0463  | 0.677850 |
| Myo1h         | chr5:114314940-114364576  | 10.2819 | 10.6850 | 0.0555  | 0.722991 |

|               |                          |          |          |         |          |
|---------------|--------------------------|----------|----------|---------|----------|
| Ccdc63        | chr5:122108039-122138957 | 0.3022   | 0.3712   | 0.2967  | 0.807052 |
| Ogfod2        | chr5:124112296-124115483 | 8.5765   | 8.3067   | -0.0461 | 0.756236 |
| Slc15a4       | chr5:127595663-127632897 | 5.3317   | 5.2133   | -0.0324 | 0.876608 |
| Dtx2          | chr5:135994799-136032872 | 3.4962   | 3.4024   | -0.0392 | 0.837451 |
| Ift22         | chr5:136908149-136913244 | 2.5803   | 2.8726   | 0.1548  | 0.682560 |
| Cyth3         | chr5:143622446-143710250 | 16.9371  | 17.5306  | 0.0497  | 0.706813 |
| Polr1d        | chr5:147077049-147111361 | 30.1157  | 31.5212  | 0.0658  | 0.809173 |
| A430035B10Rik | chr6:8488794-8510430     | 1.4090   | 1.5392   | 0.1275  | 0.809703 |
| Gm26738       | chr6:17834584-17835185   | 1.5067   | 1.8115   | 0.2658  | 0.754528 |
| Ndufb2        | chr6:39592573-39603382   | 4.7340   | 4.5761   | -0.0489 | 0.841265 |
| Trbv12-2      | chr6:41118863-41119364   | 42.2531  | 44.7819  | 0.0839  | 0.747661 |
| Trbd1         | chr6:41533200-41533212   | 725.9627 | 696.9206 | -0.0589 | 0.771675 |
| Trbj1-3       | chr6:41534322-41534376   | 177.1207 | 168.1734 | -0.0748 | 0.827858 |
| 4921507P07Rik | chr6:50573301-50596632   | 1.3568   | 1.2617   | -0.1048 | 0.697897 |
| Nap1i5        | chr6:58905233-58907126   | 0.3524   | 0.4300   | 0.0269  | 0.765051 |
| Il23r         | chr6:67422931-67491855   | 0.6876   | 0.8095   | 0.2354  | 0.733659 |
| Krcc1         | chr6:71272018-71285318   | 54.7086  | 53.4180  | -0.0344 | 0.895787 |
| Stambp        | chr6:83543205-83572504   | 2.8801   | 3.1300   | 0.1201  | 0.757100 |
| Eefsec        | chr6:88257333-88446539   | 15.8303  | 16.4706  | 0.0572  | 0.641326 |
| Chchd6        | chr6:89383145-89595652   | 1.5878   | 1.3589   | -0.2246 | 0.738622 |
| Vhl           | chr6:113623958-113631633 | 13.9567  | 13.6433  | -0.0328 | 0.881327 |
| Adipor2       | chr6:119353149-119417483 | 48.7710  | 48.1242  | -0.0193 | 0.889081 |
| Rad52         | chr6:119902697-119922828 | 10.3196  | 10.1078  | -0.0299 | 0.881795 |
| Pex26         | chr6:121183666-121198837 | 2.0770   | 2.2277   | 0.1010  | 0.738925 |
| Ptpn6         | chr6:124720706-124738714 | 78.8384  | 81.6763  | 0.0510  | 0.778732 |
| Lrrc23        | chr6:124769862-124779727 | 2.5155   | 2.3525   | -0.0966 | 0.813857 |
| Ndufa9        | chr6:126821862-126849144 | 44.8663  | 46.6195  | 0.0553  | 0.626647 |
| Tulp3         | chr6:128321139-128355851 | 0.3265   | 0.2985   | -0.1295 | 0.682726 |
| Clec2i        | chr6:128887587-128898167 | 40.3385  | 39.7288  | -0.0220 | 0.892584 |
| Mansc1        | chr6:134609209-134632488 | 2.4440   | 2.6362   | 0.1092  | 0.701981 |
| Leng9         | chr7:4148182-4149872     | 7.2126   | 6.8622   | -0.0718 | 0.866247 |
| Zfp628        | chr7:4915216-4922003     | 3.6224   | 3.4166   | -0.0844 | 0.853247 |
| Zfp418        | chr7:7171329-7183562     | 2.3899   | 2.2544   | -0.0842 | 0.823500 |
| Zfp772        | chr7:7202121-7209998     | 1.8964   | 2.0453   | 0.1090  | 0.662494 |
| Zbtb45        | chr7:13004935-13009822   | 7.9039   | 7.5955   | -0.0574 | 0.872485 |
| Myopos        | chr7:18993552-19001222   | 12.6087  | 13.6570  | 0.1152  | 0.719939 |
| Fbxo46        | chr7:19119858-19138261   | 12.9123  | 12.5558  | -0.0404 | 0.863903 |
| Gm16184       | chr7:19911824-19912397   | 3.6127   | 3.2101   | -0.1705 | 0.797416 |
| Zfp61         | chr7:24291038-24301232   | 5.0723   | 4.9268   | -0.0420 | 0.811180 |
| Ccdc97        | chr7:25711105-25719088   | 6.8207   | 6.6319   | -0.0405 | 0.859064 |
| Sertad3       | chr7:27473767-27477359   | 12.7513  | 13.4876  | 0.0810  | 0.609797 |
| Capn12        | chr7:28881655-28893585   | 3.2603   | 3.1010   | -0.0722 | 0.889677 |
| Wdr62         | chr7:30240137-30280419   | 1.5484   | 1.4743   | -0.0707 | 0.822631 |
| Gm17104       | chr7:30564736-30565356   | 42.9115  | 41.0927  | -0.0625 | 0.864655 |
| Ankrd27       | chr7:35586246-35639237   | 17.6381  | 18.3262  | 0.0552  | 0.634640 |
| Gm26856       | chr7:49856161-49857600   | 6.5682   | 6.2242   | -0.0776 | 0.825317 |
| Trpm1         | chr7:64153834-64269775   | 0.8141   | 0.8779   | 0.1089  | 0.815544 |
| Fan1          | chr7:64346757-64374095   | 3.0735   | 3.2582   | 0.0842  | 0.753092 |
| Prkrir        | chr7:98703102-98718062   | 41.9567  | 41.2970  | -0.0229 | 0.900173 |
| Ppme1         | chr7:100326736-100371896 | 16.7887  | 16.4359  | -0.0306 | 0.864861 |
| Fchsdl        | chr7:101108774-101284405 | 5.9329   | 6.2083   | 0.0654  | 0.826849 |
| Lamtor1       | chr7:101905836-101911901 | 30.5110  | 29.6991  | -0.0389 | 0.874081 |
| Lrrc51        | chr7:101912983-101933895 | 3.5776   | 3.9634   | 0.1477  | 0.718481 |
| Trim12c       | chr7:104338753-104353362 | 27.3403  | 28.2640  | 0.0479  | 0.735544 |
| Tmem41b       | chr7:109972186-109986929 | 2.7447   | 2.9146   | 0.0867  | 0.727694 |
| Far1os        | chr7:113530488-113564987 | 6.3028   | 5.8925   | -0.0971 | 0.845505 |
| Ccp110        | chr7:118712551-118737024 | 4.6764   | 4.5457   | -0.0409 | 0.881389 |
| 9030624J02Rik | chr7:118740225-118842966 | 11.7854  | 12.1513  | 0.0441  | 0.617852 |
| Acsm3         | chr7:119760922-119787513 | 1.6042   | 1.7076   | 0.0902  | 0.649759 |
| Cln3          | chr7:126571206-126585817 | 10.4992  | 10.8761  | 0.0509  | 0.679123 |
| Prr14         | chr7:127459610-127476759 | 13.8065  | 14.4203  | 0.0628  | 0.765112 |
| Dhx32         | chr7:133720941-133782726 | 6.4788   | 6.3386   | -0.0316 | 0.867689 |
| Rassf7        | chr7:141215859-141218658 | 5.6255   | 6.0045   | 0.0941  | 0.774348 |
| Tmco3         | chr8:13288012-13322924   | 4.3060   | 4.1688   | -0.0467 | 0.743994 |
| Rpl19-ps11    | chr8:19492905-19493623   | 11.6561  | 11.0462  | -0.0775 | 0.767953 |
| Gm16933       | chr8:25037051-25041757   | 21.9996  | 22.9676  | 0.0621  | 0.736896 |
| Pomk          | chr8:25980603-25994121   | 6.2912   | 6.6889   | 0.0884  | 0.790119 |
| Micu3         | chr8:40307457-40386308   | 3.6134   | 3.8038   | 0.0741  | 0.764682 |
| Mttr7         | chr8:40551094-40634797   | 4.1180   | 3.9506   | -0.0599 | 0.883043 |
| Pcm1          | chr8:41239758-41334086   | 24.4351  | 24.1846  | -0.0149 | 0.919573 |
| Ufsp2         | chr8:45975527-45996958   | 14.5887  | 14.2673  | -0.0321 | 0.861269 |



|               |                          |          |          |         |          |
|---------------|--------------------------|----------|----------|---------|----------|
| Sap30         | chr8:57482706-57487860   | 4.4643   | 4.1391   | -0.1091 | 0.817887 |
| Tmem161a      | chr8:70172355-70183681   | 8.4662   | 8.8667   | 0.0667  | 0.774861 |
| Slc25a42      | chr8:70184339-70212305   | 0.9829   | 1.0626   | 0.1125  | 0.587032 |
| Comp          | chr8:70373547-70382065   | 0.3764   | 0.4539   | 0.2701  | 0.774508 |
| Arrdc2        | chr8:70835154-70839720   | 7.8898   | 8.3124   | 0.0753  | 0.741942 |
| Ano8          | chr8:71476022-71486067   | 7.6773   | 7.4577   | -0.0419 | 0.889666 |
| Gtpbp3        | chr8:71488102-71499583   | 7.8958   | 7.6749   | -0.0409 | 0.895628 |
| Jak3          | chr8:71676295-71690575   | 40.2229  | 42.1286  | 0.0668  | 0.853208 |
| Tmem38a       | chr8:72572102-72587282   | 0.8542   | 0.7658   | -0.1577 | 0.362291 |
| Gm5353        | chr8:76862255-76863048   | 3.3573   | 3.0838   | -0.1226 | 0.814729 |
| Prmt10        | chr8:77549396-77581338   | 10.6076  | 10.9904  | 0.0511  | 0.739606 |
| Ddx39         | chr8:83715176-83726892   | 53.3087  | 52.7519  | -0.0151 | 0.903754 |
| Dand5         | chr8:84815404-84822823   | 2.4452   | 2.7161   | 0.1516  | 0.780075 |
| Dus2          | chr8:105991336-106053840 | 8.0922   | 7.8814   | -0.0381 | 0.860881 |
| Gm10073       | chr8:106572965-106573461 | 4.2239   | 3.7802   | -0.1601 | 0.780292 |
| Cog4          | chr8:110846599-110882227 | 18.2270  | 18.0277  | -0.0159 | 0.905892 |
| Glg1          | chr8:111154420-111259216 | 30.5765  | 31.5373  | 0.0446  | 0.660127 |
| Tldc1         | chr8:119760586-119778416 | 6.3002   | 6.0266   | -0.0641 | 0.872538 |
| Spg7          | chr8:123062941-123097760 | 14.8862  | 14.6200  | -0.0260 | 0.886706 |
| Afg3l1        | chr8:123477902-123503916 | 8.2874   | 8.6341   | 0.0591  | 0.725919 |
| 2810004N23Rik | chr8:124839354-124863029 | 23.8876  | 25.0076  | 0.0661  | 0.763564 |
| Med17         | chr9:15260351-15279867   | 17.6148  | 17.3313  | -0.0234 | 0.858781 |
| Zfp26         | chr9:20432971-20460162   | 19.0787  | 18.8798  | -0.0151 | 0.922975 |
| Mrpl4         | chr9:21002736-21008835   | 22.7434  | 22.1650  | -0.0372 | 0.822209 |
| Tyk2          | chr9:21104068-21127346   | 37.6581  | 37.1672  | -0.0189 | 0.927302 |
| Tmed1         | chr9:21507379-21510186   | 5.9576   | 6.3340   | 0.0884  | 0.781837 |
| Bbs9          | chr9:22475714-22888280   | 4.0421   | 4.2470   | 0.0713  | 0.774970 |
| Hmbs          | chr9:44336349-44344228   | 11.5512  | 11.2129  | -0.0429 | 0.854103 |
| Il10ra        | chr9:45253836-45269149   | 48.3271  | 50.1971  | 0.0548  | 0.830181 |
| Dlat          | chr9:50634632-50659780   | 10.0136  | 9.7952   | -0.0318 | 0.879685 |
| Idh3a         | chr9:54586510-54604661   | 29.0574  | 28.5739  | -0.0242 | 0.881624 |
| Peak1         | chr9:56201130-56418050   | 5.7462   | 5.5884   | -0.0402 | 0.914467 |
| Arid3b        | chr9:57790352-57836793   | 2.7347   | 2.8617   | 0.0655  | 0.492914 |
| Gm10642       | chr9:70656250-70657860   | 9.9614   | 9.6386   | -0.0475 | 0.818893 |
| Mapk6         | chr9:75369061-75410005   | 15.7321  | 15.5872  | -0.0133 | 0.889590 |
| Tmem30a       | chr9:79768942-79793507   | 36.0260  | 37.3128  | 0.0506  | 0.699693 |
| Bckdhd        | chr9:83925149-84124239   | 4.3188   | 4.6421   | 0.1041  | 0.708513 |
| Dopey1        | chr9:86485406-86555806   | 16.6000  | 16.3813  | -0.0191 | 0.893077 |
| Rwdd2a        | chr9:86572052-86574896   | 1.6406   | 1.8182   | 0.1483  | 0.691546 |
| Snhg5         | chr9:88521051-88522929   | 45.3442  | 47.2624  | 0.0598  | 0.750046 |
| Gm16262       | chr9:94695703-94702319   | 0.9052   | 0.8001   | -0.1782 | 0.821841 |
| Tfdp2         | chr9:96196274-96323646   | 6.6223   | 6.4808   | -0.0312 | 0.883411 |
| Poc1a         | chr9:106281060-106349891 | 6.0701   | 5.7470   | -0.0789 | 0.800270 |
| 4930524O07Rik | chr9:106892170-106895182 | 1.3152   | 1.5164   | 0.2053  | 0.768351 |
| Gm20662       | chr9:107996348-108045270 | 30.2594  | 31.2745  | 0.0476  | 0.658248 |
| Apeh          | chr9:108085416-108094480 | 32.4881  | 32.0185  | -0.0210 | 0.920911 |
| Rhoa          | chr9:108306204-108337939 | 51.0833  | 53.0159  | 0.0536  | 0.777876 |
| Gm10615       | chr9:110117702-110119916 | 2.6538   | 2.4611   | -0.1088 | 0.840047 |
| Tgfb2         | chr9:116087697-116175363 | 51.9618  | 51.6398  | -0.0090 | 0.887580 |
| Eif1b         | chr9:120492605-120495327 | 46.3310  | 45.5459  | -0.0247 | 0.836659 |
| Sec22c        | chr9:121680046-121705490 | 6.3369   | 6.1863   | -0.0347 | 0.898530 |
| Bcor          | chrX:12036739-12160355   | 20.4291  | 20.2199  | -0.0148 | 0.925182 |
| Syn1          | chrX:20860510-20921004   | 1.1336   | 1.2633   | 0.1563  | 0.817739 |
| C1galt1c1     | chrX:38630784-38635087   | 13.3880  | 12.9911  | -0.0434 | 0.865187 |
| Sash3         | chrX:48146435-48161565   | 196.4182 | 194.9119 | -0.0111 | 0.909315 |
| Zfp275        | chrX:73342620-73359080   | 16.4153  | 16.9632  | 0.0474  | 0.717275 |
| Irak1         | chrX:74013913-74023918   | 22.5737  | 22.3113  | -0.0169 | 0.899034 |
| Gm7061        | chrX:94772615-94774034   | 1.1077   | 0.9474   | -0.2255 | 0.805865 |
| Taf1          | chrX:101532733-101601789 | 27.8203  | 27.4943  | -0.0170 | 0.894674 |
| Rlim          | chrX:103957162-103981284 | 35.5689  | 35.2962  | -0.0111 | 0.925435 |
| Mospd2        | chrX:164936168-164980375 | 3.0877   | 3.2552   | 0.0762  | 0.789464 |
| Hccs          | chrX:169250192-169320372 | 8.3640   | 8.7039   | 0.0575  | 0.781757 |
| Oxct1         | chr15:4026382-4155344    | 36.2327  | 37.6241  | 0.0544  | 0.784712 |
| Ranbp3l       | chr15:8968425-9066551    | 0.1931   | 0.2466   | 0.3525  | 0.778167 |
| Capsl         | chr15:9436027-9466035    | 3.6443   | 3.3713   | -0.1124 | 0.651391 |
| Dnajc21       | chr15:10446755-10470516  | 7.6563   | 8.0410   | 0.0707  | 0.771673 |
| Rad1          | chr15:10486017-10499063  | 4.5319   | 4.4289   | -0.0332 | 0.868967 |
| Fam173b       | chr15:31601851-31621227  | 4.5582   | 4.4429   | -0.0370 | 0.859431 |
| Cox6c         | chr15:35925885-35938246  | 26.7963  | 27.8383  | 0.0550  | 0.839248 |
| Azin1         | chr15:38487429-38519266  | 35.9744  | 37.1279  | 0.0455  | 0.779955 |
| Ext1          | chr15:53064037-53346159  | 10.0154  | 9.8468   | -0.0245 | 0.886793 |

|               |                           |          |          |         |          |
|---------------|---------------------------|----------|----------|---------|----------|
| Ly6k          | chr15:74796873-74799986   | 1.9805   | 1.7016   | -0.2190 | 0.836112 |
| Oplah         | chr15:76296596-76328015   | 2.2234   | 2.1293   | -0.0624 | 0.846481 |
| Cyhr1         | chr15:76643394-76660117   | 12.5726  | 13.0514  | 0.0539  | 0.775039 |
| Recql4        | chr15:76703552-76710559   | 3.6800   | 3.5028   | -0.0712 | 0.875577 |
| Lrrc14        | chr15:76710622-76717699   | 5.4222   | 5.2702   | -0.0410 | 0.891213 |
| Myh9          | chr15:77760586-77842175   | 239.7186 | 237.9216 | -0.0109 | 0.947600 |
| C1qtnf6       | chr15:78523345-78529625   | 3.5483   | 3.4055   | -0.0593 | 0.791505 |
| Pla2g6        | chr15:79286227-79328390   | 3.1038   | 2.9863   | -0.0557 | 0.799189 |
| Maff          | chr15:79347540-79359072   | 0.9455   | 1.0597   | 0.1646  | 0.780283 |
| Parvg         | chr15:84324025-84342978   | 47.8473  | 49.5386  | 0.0501  | 0.827386 |
| Ncaph2        | chr15:89355718-89372826   | 40.3738  | 41.6342  | 0.0443  | 0.689907 |
| Yaf2          | chr15:93284277-93336935   | 15.8369  | 16.7490  | 0.0808  | 0.819548 |
| Zcrb1         | chr15:93386096-93398334   | 13.8621  | 13.5918  | -0.0284 | 0.834983 |
| Acvr1b        | chr15:101174103-101213678 | 8.6510   | 8.5110   | -0.0235 | 0.867307 |
| Esp1          | chr15:102296292-102324356 | 3.8786   | 4.1423   | 0.0949  | 0.850865 |
| Vcl           | chr14:20929432-21033673   | 3.9662   | 3.8580   | -0.0399 | 0.887824 |
| 9930004E17Rik | chr14:26670009-26670507   | 1.4625   | 1.8307   | 0.3239  | 0.786614 |
| Snord19       | chr14:31016205-31016281   | 30.5793  | 26.0989  | -0.2286 | 0.819219 |
| Phf7          | chr14:31237695-31251218   | 7.8791   | 8.3446   | 0.0828  | 0.783470 |
| Gm15601       | chr14:45587739-45598512   | 2.5301   | 2.4330   | -0.0565 | 0.747931 |
| Gm6055        | chr14:48079135-48079806   | 2.7720   | 2.4566   | -0.1743 | 0.770607 |
| Tepl          | chr14:50824061-50870560   | 7.4029   | 7.7003   | 0.0568  | 0.710985 |
| Gm26782       | chr14:50870363-50879003   | 5.9662   | 5.6535   | -0.0777 | 0.866268 |
| Trav13-2      | chr14:53634828-53635398   | 2.7342   | 2.2581   | -0.2760 | 0.701740 |
| Traj18        | chr14:54200776-54200842   | 44.9561  | 50.6540  | 0.1722  | 0.798921 |
| Lrp10         | chr14:54464163-54471497   | 66.9130  | 65.7841  | -0.0245 | 0.930817 |
| Nop9          | chr14:55745692-55755500   | 14.7017  | 15.2320  | 0.0511  | 0.770634 |
| Sdr39u1       | chr14:55897285-55900232   | 48.3587  | 50.1644  | 0.0529  | 0.212153 |
| Mir719        | chr14:60228805-60228915   | 89.5274  | 95.9103  | 0.0994  | 0.753763 |
| Spata13       | chr14:60634000-60764556   | 62.1574  | 61.8629  | -0.0069 | 0.944278 |
| Cysltr2       | chr14:73029127-73049114   | 9.0906   | 9.5487   | 0.0709  | 0.764374 |
| Lrch1         | chr14:74754673-74947877   | 18.1240  | 18.7625  | 0.0499  | 0.494482 |
| Rbm26         | chr14:105106750-105177327 | 19.9552  | 20.5605  | 0.0431  | 0.689034 |
| Ndfip2        | chr14:105258572-105309298 | 5.6110   | 5.5167   | -0.0245 | 0.868026 |
| Uggt2         | chr14:118985038-119099430 | 0.1328   | 0.1542   | 0.2156  | 0.806200 |
| Sytl3         | chr17:6673457-6738042     | 1.7265   | 1.8960   | 0.1351  | 0.792496 |
| Mpc1          | chr17:8282903-8297661     | 3.5986   | 3.4405   | -0.0648 | 0.785283 |
| Tbp           | chr17:15499887-15528379   | 9.1055   | 9.4263   | 0.0499  | 0.613075 |
| Pdcd2         | chr17:15519207-15527301   | 20.1780  | 19.7998  | -0.0273 | 0.861777 |
| Prdm9         | chr17:15543078-15564354   | 1.2944   | 1.4196   | 0.1332  | 0.833522 |
| Zfp948        | chr17:21567045-21588697   | 7.3137   | 7.0873   | -0.0454 | 0.834936 |
| Flywch1       | chr17:23755422-23771591   | 9.1780   | 9.5903   | 0.0634  | 0.743558 |
| Spsb3         | chr17:24886642-24892152   | 21.7884  | 22.7022  | 0.0593  | 0.706397 |
| Haghl         | chr17:25779842-25785673   | 10.6023  | 11.0512  | 0.0598  | 0.355849 |
| Nme4          | chr17:26091733-26095508   | 1.3476   | 1.5118   | 0.1659  | 0.671054 |
| Luc7l         | chr17:26252909-26285504   | 18.3173  | 18.8928  | 0.0446  | 0.670863 |
| Hba-ps4       | chr17:26286362-26287061   | 1.8920   | 1.5538   | -0.2842 | 0.739959 |
| Zbtb9         | chr17:26973166-26976205   | 26.1231  | 25.8377  | -0.0158 | 0.807107 |
| Cyp4f41-ps    | chr17:32950960-32965700   | 0.4006   | 0.3191   | -0.3281 | 0.818320 |
| Gm20496       | chr17:34199315-34205449   | 196.9404 | 203.4484 | 0.0469  | 0.635306 |
| H2-Aa         | chr17:34282743-34287827   | 6.8111   | 7.2261   | 0.0853  | 0.797459 |
| Gpsm3         | chr17:34589805-34591754   | 56.9624  | 56.0215  | -0.0240 | 0.896966 |
| Mad2l1bp      | chr17:46147389-46153553   | 12.8642  | 12.4795  | -0.0438 | 0.876896 |
| Gm26785       | chr17:46273478-46280060   | 0.9421   | 1.0858   | 0.2047  | 0.822122 |
| Uhrf1         | chr17:56303320-56323486   | 19.3955  | 20.2063  | 0.0591  | 0.809850 |
| Rpl36         | chr17:56613394-56614243   | 10.3788  | 11.3276  | 0.1262  | 0.782514 |
| Lonp1         | chr17:56614300-56626903   | 29.5997  | 30.6452  | 0.0501  | 0.542073 |
| Gpr108        | chr17:57234913-57247641   | 30.6855  | 30.2414  | -0.0210 | 0.854333 |
| Vav1          | chr17:57279099-57328031   | 61.6163  | 61.2699  | -0.0081 | 0.869169 |
| Ppp4r1        | chr17:65782572-65841926   | 11.4364  | 11.8946  | 0.0567  | 0.715133 |
| Qpct          | chr17:79051905-79090243   | 0.6721   | 0.7848   | 0.2236  | 0.774053 |
| Srbd1         | chr17:85984664-86145175   | 13.6609  | 14.3541  | 0.0714  | 0.816232 |
| Socs5         | chr17:87107678-87137583   | 10.0415  | 9.7960   | -0.0357 | 0.861766 |
| Zfp263        | chr16:3744092-3750790     | 23.7277  | 23.4269  | -0.0184 | 0.839961 |
| Nudt16l1      | chr16:4939110-4941020     | 21.6093  | 21.0293  | -0.0393 | 0.796468 |
| Rsl1d1        | chr16:11192969-11203331   | 75.3973  | 74.2167  | -0.0228 | 0.924264 |
| Gm15950       | chr16:13919426-13921399   | 1.9215   | 1.7572   | -0.1289 | 0.804395 |
| Mzt2          | chr16:15848440-15863369   | 5.1177   | 4.8536   | -0.0764 | 0.725861 |
| Rpl26-ps4     | chr16:17711667-17712105   | 2.4668   | 2.8651   | 0.2160  | 0.808174 |
| Camk2n2       | chr16:20619214-20621287   | 1.0551   | 0.8740   | -0.2717 | 0.815934 |
| Dnajb11       | chr16:22857844-22879634   | 39.2523  | 38.7673  | -0.0179 | 0.900659 |

|               |                          |          |          |         |          |
|---------------|--------------------------|----------|----------|---------|----------|
| Eif4a2        | chr16:23107443-23114136  | 106.6857 | 110.4873 | 0.0505  | 0.824270 |
| Lrch3         | chr16:32914099-33015647  | 27.5126  | 27.1845  | -0.0173 | 0.889351 |
| D930030I03Rik | chr16:38451981-38453493  | 4.1878   | 4.5786   | 0.1287  | 0.812925 |
| 2610015P09Rik | chr16:43889799-43964314  | 2.7885   | 2.6899   | -0.0519 | 0.722950 |
| Naa50         | chr16:44139829-44163366  | 17.1309  | 16.7525  | -0.0322 | 0.913781 |
| Trmt10c       | chr16:56032608-56037819  | 21.7736  | 22.8550  | 0.0699  | 0.798173 |
| Hspa13        | chr16:75755189-75766821  | 7.4826   | 7.3056   | -0.0345 | 0.813447 |
| D16Ertd472e   | chr16:78544011-78576657  | 27.6005  | 28.6821  | 0.0555  | 0.741850 |
| Usp16         | chr16:87454702-87483517  | 9.5744   | 9.9358   | 0.0535  | 0.742583 |
| 1810055G02Rik | chr19:3708332-3717881    | 2.1006   | 2.3078   | 0.1358  | 0.606927 |
| Ssh3          | chr19:4261667-4269172    | 6.1957   | 5.9564   | -0.0568 | 0.820751 |
| Ankrd13d      | chr19:4270179-4283137    | 1.8382   | 1.7234   | -0.0931 | 0.791335 |
| Adrbk1        | chr19:4286000-4306222    | 101.3977 | 100.4321 | -0.0138 | 0.931737 |
| Gm21992       | chr19:4742912-4811612    | 19.5548  | 19.3111  | -0.0181 | 0.842192 |
| Rbm4          | chr19:4784292-4793901    | 25.5877  | 25.3017  | -0.0162 | 0.917438 |
| Zfp1          | chr19:6076486-6084944    | 12.1193  | 11.7891  | -0.0399 | 0.835121 |
| Gm23246       | chr19:8725593-8725660    | 27.3949  | 31.4927  | 0.2011  | 0.778229 |
| Minpp1        | chr19:32485768-32515370  | 22.6438  | 22.1239  | -0.0335 | 0.875799 |
| 1500017E21Rik | chr19:36614051-36705641  | 1.0659   | 0.9555   | -0.1578 | 0.833960 |
| Cep55         | chr19:38055024-38074425  | 11.3330  | 11.8969  | 0.0700  | 0.821672 |
| Poll          | chr19:45552274-45560531  | 7.2624   | 7.6844   | 0.0815  | 0.709909 |
| Npm3          | chr19:45747733-45749591  | 22.0515  | 21.1690  | -0.0589 | 0.900907 |
| Gm15491       | chr19:45749507-45752310  | 73.8455  | 76.9550  | 0.0595  | 0.761642 |
| Nt5c2         | chr19:46886830-47015153  | 9.5235   | 9.3374   | -0.0285 | 0.872438 |
| Gm19557       | chr19:47512981-47516578  | 4.3887   | 4.6936   | 0.0969  | 0.778973 |
| Add3          | chr19:53140444-53247399  | 69.0834  | 68.5635  | -0.0109 | 0.938901 |
| Ly96          | chr1:16688455-16709605   | 8.1052   | 8.7525   | 0.1108  | 0.648549 |
| Tmem14a       | chr1:21218574-21230167   | 3.4194   | 3.7579   | 0.1362  | 0.823770 |
| Gm21909       | chr1:21312516-21316320   | 4.6136   | 4.0299   | -0.1952 | 0.786499 |
| Rab23         | chr1:33719881-33742564   | 1.4235   | 1.5146   | 0.0895  | 0.680380 |
| Neurl3        | chr1:36264601-36273425   | 32.9660  | 34.2158  | 0.0537  | 0.636356 |
| Myo1b         | chr1:51749764-51916071   | 0.0706   | 0.0888   | 0.3320  | 0.766685 |
| Orc2          | chr1:58462770-58505109   | 15.8987  | 15.5044  | -0.0362 | 0.908033 |
| Pecr          | chr1:72259166-72284314   | 1.5243   | 1.7871   | 0.2295  | 0.724813 |
| Farsb         | chr1:78417957-78488859   | 36.9450  | 38.4299  | 0.0569  | 0.779877 |
| Gm17017       | chr1:85641221-85650585   | 2.2603   | 2.4836   | 0.1359  | 0.733591 |
| Snora75       | chr1:86351168-86351301   | 15.1348  | 12.9003  | -0.2305 | 0.851843 |
| Gm6136        | chr1:86908761-86909703   | 2.1951   | 1.9297   | -0.1859 | 0.722283 |
| Eif4e2        | chr1:87213913-87240488   | 14.5382  | 14.2957  | -0.0243 | 0.883985 |
| Sag           | chr1:87803679-87845158   | 0.6328   | 0.6833   | 0.1106  | 0.763507 |
| Pask          | chr1:93308769-93343482   | 2.3070   | 2.2388   | -0.0433 | 0.818490 |
| Ccdc93        | chr1:121431048-121506460 | 7.3347   | 7.2575   | -0.0153 | 0.870744 |
| Faim3         | chr1:130865668-130880790 | 1.7935   | 2.0266   | 0.1763  | 0.816950 |
| 6030442K20Rik | chr1:132466432-132477045 | 1.2624   | 1.1484   | -0.1365 | 0.786869 |
| Camsap2       | chr1:136268122-136346104 | 8.5308   | 8.8785   | 0.0576  | 0.763794 |
| Ptprc         | chr1:138062860-138175706 | 601.3081 | 596.0958 | -0.0126 | 0.920661 |
| Gm16304       | chr1:139133890-139134665 | 1.6585   | 1.9348   | 0.2223  | 0.671131 |
| Swf1          | chr1:151367698-151428455 | 6.3400   | 6.6152   | 0.0613  | 0.780039 |
| Tnfsf4        | chr1:161395408-161418410 | 3.3320   | 3.0549   | -0.1253 | 0.874215 |
| 4930500M09Rik | chr1:170214859-170215556 | 5.2757   | 5.9370   | 0.1704  | 0.829896 |
| Ndufs2        | chr1:171234852-171247122 | 67.8142  | 67.1189  | -0.0149 | 0.884513 |
| Usf1          | chr1:171411312-171419142 | 19.3027  | 19.9941  | 0.0508  | 0.319587 |
| B020018G12Rik | chr1:175977776-175979114 | 1.7723   | 1.5719   | -0.1732 | 0.770983 |
| Cep170        | chr1:176733652-176807124 | 8.7187   | 8.6165   | -0.0170 | 0.650106 |
| Sdccag8       | chr1:176814659-177020437 | 9.4710   | 9.8357   | 0.0545  | 0.609917 |
| Gpatch2       | chr1:187215507-187351704 | 7.2460   | 7.0999   | -0.0294 | 0.872759 |
| Nenf          | chr1:191306788-191318194 | 7.1604   | 8.8099   | 0.2991  | 0.704274 |
| Lpgat1        | chr1:191717833-191784255 | 9.6751   | 9.5371   | -0.0207 | 0.865477 |
| Slc30a1       | chr1:191906766-191913247 | 7.5880   | 7.9330   | 0.0642  | 0.782720 |
| Gm24959       | chr18:20844446-20844592  | 6.4242   | 5.3117   | -0.2743 | 0.739567 |
| Pik3c3        | chr18:30272746-30348126  | 18.1020  | 18.8148  | 0.0557  | 0.781548 |
| Eif4ebp3      | chr18:36664059-36665917  | 20.6088  | 19.6361  | -0.0698 | 0.842281 |
| Hars2         | chr18:36783007-36792562  | 11.7712  | 11.5703  | -0.0248 | 0.902422 |
| Cep120        | chr18:53681723-53744547  | 19.5825  | 20.3715  | 0.0570  | 0.777108 |
| Gnal          | chr18:67088335-67226792  | 9.6217   | 10.0609  | 0.0644  | 0.753683 |
| B430212C06Rik | chr18:67321208-67344103  | 0.7012   | 0.6480   | -0.1138 | 0.728658 |
| Psmg2         | chr18:67641598-67654162  | 24.3662  | 23.7869  | -0.0347 | 0.845396 |
| Poli          | chr18:70508679-70530620  | 9.9595   | 9.7667   | -0.0282 | 0.660561 |
| Gm26202       | chr18:75001879-75001944  | 25.4893  | 29.8679  | 0.2287  | 0.825770 |
| Hspa14        | chr2:3488849-3512814     | 15.0316  | 15.5108  | 0.0453  | 0.660423 |
| Gm13256       | chr2:9877255-9878869     | 6.9664   | 7.6993   | 0.1443  | 0.819756 |

|               |                          |          |          |         |          |
|---------------|--------------------------|----------|----------|---------|----------|
| 4930426L09Rik | chr2:18998342-18999801   | 1.3691   | 1.2310   | -0.1534 | 0.810084 |
| Gm13331       | chr2:23508859-23509307   | 12.0294  | 11.2037  | -0.1026 | 0.845985 |
| Abca2         | chr2:25428702-25448540   | 20.3606  | 21.2509  | 0.0617  | 0.842959 |
| Trub2         | chr2:29761223-29788502   | 6.4346   | 6.6856   | 0.0552  | 0.566870 |
| Asb6          | chr2:30823096-30830333   | 9.3890   | 9.2734   | -0.0179 | 0.853008 |
| Tor1a         | chr2:30960626-30967933   | 17.4815  | 18.3012  | 0.0661  | 0.810957 |
| Fnbp1         | chr2:31026205-31142008   | 24.1081  | 23.7972  | -0.0187 | 0.899559 |
| Gm13443       | chr2:35340360-35341316   | 0.8652   | 0.7149   | -0.2753 | 0.839770 |
| Nek6          | chr2:38511642-38588041   | 1.4419   | 1.3337   | -0.1125 | 0.826558 |
| Ppp6c         | chr2:39194353-39226451   | 22.3116  | 23.1799  | 0.0551  | 0.810465 |
| Prpf40a       | chr2:53134703-53191284   | 28.3108  | 28.0031  | -0.0158 | 0.894995 |
| B3galt1       | chr2:67748211-68122689   | 0.1820   | 0.1424   | -0.3542 | 0.824094 |
| Ppig          | chr2:69722544-69754012   | 10.3304  | 10.6731  | 0.0471  | 0.622167 |
| 1110051M20Rik | chr2:91275067-91444704   | 9.2571   | 9.6010   | 0.0526  | 0.605764 |
| Zfp408        | chr2:91643668-91649791   | 8.0664   | 7.9135   | -0.0276 | 0.853840 |
| Cry2          | chr2:92403645-92434043   | 3.0945   | 2.9843   | -0.0523 | 0.851710 |
| 4921507L20Rik | chr2:93980033-93983575   | 1.3742   | 1.5354   | 0.1600  | 0.771310 |
| Commd9        | chr2:101886246-101901646 | 6.4953   | 6.1966   | -0.0679 | 0.864312 |
| Rpusd2        | chr2:119034789-119039769 | 2.8593   | 2.7188   | -0.0727 | 0.861639 |
| Gm22953       | chr2:121450669-121450770 | 27.9692  | 25.5963  | -0.1279 | 0.719790 |
| Myef2         | chr2:125084627-125123661 | 6.8052   | 7.1430   | 0.0699  | 0.774663 |
| Gabpb1        | chr2:126627441-126676337 | 11.2519  | 11.6685  | 0.0524  | 0.735172 |
| Vps16         | chr2:130424338-130444269 | 39.5339  | 40.7942  | 0.0453  | 0.666924 |
| A730017L22Rik | chr2:130873058-130906396 | 2.0827   | 2.0147   | -0.0479 | 0.791040 |
| Crnk1         | chr2:145917478-145935014 | 26.8313  | 26.4979  | -0.0180 | 0.869658 |
| Cd93          | chr2:148436639-148443563 | 0.3900   | 0.4437   | 0.1862  | 0.828864 |
| Raly          | chr2:154791095-154867261 | 86.4326  | 85.6659  | -0.0129 | 0.931394 |
| Aar2          | chr2:156547583-156568972 | 10.1406  | 9.9361   | -0.0294 | 0.892963 |
| Rpn2          | chr2:157279016-157326319 | 56.3338  | 58.0995  | 0.0445  | 0.656077 |
| Slc35c2       | chr2:165276553-165287869 | 9.9397   | 9.7362   | -0.0298 | 0.865493 |
| Pfdn4         | chr2:170496427-170519123 | 7.8457   | 7.5679   | -0.0520 | 0.887157 |
| Ppp4r1-ps     | chr2:173579319-173659640 | 2.1012   | 2.2301   | 0.0859  | 0.806195 |
| Stx16         | chr2:174076307-174099771 | 26.6443  | 26.3174  | -0.0178 | 0.911673 |
| Mir3091       | chr2:180257535-180257611 | 9.1630   | 7.3414   | -0.3198 | 0.788164 |
| Rgs19         | chr2:181688418-181693977 | 36.9827  | 36.3916  | -0.0232 | 0.870870 |
| mt-Th         | chrM:11545-11612         | 21.5628  | 18.8879  | -0.1911 | 0.783535 |
| mt-Ts2        | chrM:11612-11671         | 34.9820  | 31.2954  | -0.1607 | 0.848604 |
| C030034L19Rik | chr3:9403063-9437233     | 0.9898   | 1.0950   | 0.1458  | 0.853346 |
| Zfand1        | chr3:10339952-10351317   | 2.8902   | 2.7767   | -0.0578 | 0.857665 |
| Pde7a         | chr3:19223107-19311322   | 16.4362  | 16.2666  | -0.0150 | 0.912703 |
| Skil          | chr3:31095057-31122577   | 30.2739  | 30.0669  | -0.0099 | 0.911416 |
| Ccdc39        | chr3:33812361-33844310   | 3.3821   | 3.2859   | -0.0416 | 0.883807 |
| Anxa5         | chr3:36448924-36475843   | 59.4912  | 58.8760  | -0.0150 | 0.850033 |
| Jade1         | chr3:41555733-41616862   | 12.3654  | 12.8092  | 0.0509  | 0.455041 |
| 5031434O11Rik | chr3:51559756-51567117   | 2.2182   | 2.3867   | 0.1056  | 0.751822 |
| Med12l        | chr3:59006977-59318410   | 0.3398   | 0.3741   | 0.1386  | 0.757554 |
| P2ry14        | chr3:59114625-59130624   | 1.6368   | 1.4872   | -0.1383 | 0.811888 |
| 4931440P22Rik | chr3:65507256-65529379   | 0.3685   | 0.4401   | 0.2563  | 0.779077 |
| Smc4          | chr3:69004737-69034623   | 283.5738 | 279.4876 | -0.0209 | 0.925984 |
| Trim59        | chr3:69035287-69044755   | 22.8476  | 22.2558  | -0.0379 | 0.899140 |
| Map9          | chr3:82358071-82395268   | 0.7852   | 0.7199   | -0.1253 | 0.890018 |
| Plrg1         | chr3:83055521-83072355   | 31.6613  | 32.7603  | 0.0492  | 0.771977 |
| Pmf1          | chr3:88394142-88410316   | 20.3470  | 21.4445  | 0.0758  | 0.696711 |
| Fdps          | chr3:89093591-89101967   | 17.0678  | 16.4819  | -0.0504 | 0.853645 |
| Thbs3         | chr3:89215179-89226837   | 0.9474   | 1.0340   | 0.1261  | 0.816435 |
| Gm10702       | chr3:89353628-89354898   | 1.0163   | 1.1755   | 0.2099  | 0.711065 |
| Pbxip1        | chr3:89436705-89450952   | 48.2539  | 50.0969  | 0.0541  | 0.802270 |
| Hax1          | chr3:89995456-89998686   | 6.9760   | 6.6005   | -0.0798 | 0.795228 |
| A730011C13Rik | chr3:94994409-94997350   | 9.3633   | 9.0170   | -0.0544 | 0.879441 |
| Pip5k1a       | chr3:95058529-95106930   | 14.8292  | 15.3472  | 0.0495  | 0.700463 |
| Rbm8a         | chr3:96629927-96633779   | 13.8837  | 14.5402  | 0.0667  | 0.777029 |
| Sec22b        | chr3:97901189-97923276   | 13.1559  | 12.8788  | -0.0307 | 0.837964 |
| Kcna3         | chr3:107036161-107038129 | 53.0344  | 52.2489  | -0.0215 | 0.933847 |
| Sec24d        | chr3:123267495-123365635 | 4.9294   | 5.1947   | 0.0756  | 0.786341 |
| Tifa          | chr3:127789871-127832135 | 0.4340   | 0.3498   | -0.3112 | 0.831404 |
| Ap1ar         | chr3:127807263-127837492 | 27.4093  | 27.0316  | -0.0200 | 0.897827 |
| Cenpe         | chr3:135212562-135273540 | 10.4858  | 10.9546  | 0.0631  | 0.828614 |
| Lmo4          | chr3:144188529-144205220 | 4.2897   | 4.5796   | 0.0943  | 0.833900 |
| Syde2         | chr3:145987869-146021720 | 0.4785   | 0.4128   | -0.2131 | 0.810928 |
| Gm11814       | chr4:10438814-10439743   | 3.2156   | 2.9013   | -0.1484 | 0.831394 |
| Bach2it1      | chr4:32251760-32265835   | 5.9379   | 5.4682   | -0.1189 | 0.804678 |

|               |                           |         |         |         |          |
|---------------|---------------------------|---------|---------|---------|----------|
| Rars2         | chr4:34614956-34660167    | 13.6864 | 13.2377 | -0.0481 | 0.872772 |
| Smim8         | chr4:34768663-34778423    | 9.6253  | 9.2534  | -0.0569 | 0.892585 |
| 3110043O21Rik | chr4:35191284-35226175    | 2.7543  | 2.9187  | 0.0836  | 0.763220 |
| B4galt1       | chr4:40804601-40854005    | 26.2287 | 25.7861 | -0.0246 | 0.895222 |
| Polr1e        | chr4:45018582-45036565    | 8.4259  | 8.2401  | -0.0322 | 0.880169 |
| Fbxo10        | chr4:45034246-45084604    | 0.9591  | 0.8930  | -0.1031 | 0.669907 |
| Gm25692       | chr4:45396993-45397118    | 10.2036 | 8.7379  | -0.2237 | 0.780077 |
| Col15a1       | chr4:47208160-47313167    | 0.3761  | 0.4198  | 0.1586  | 0.805328 |
| Tgfr1         | chr4:47353221-47414931    | 29.8841 | 29.6796 | -0.0099 | 0.902743 |
| Grin3a        | chr4:49661610-49845744    | 0.3097  | 0.2871  | -0.1096 | 0.823740 |
| Akap2         | chr4:57717656-57896984    | 1.9671  | 1.8869  | -0.0601 | 0.883749 |
| Ugcg          | chr4:59189256-59222833    | 36.6538 | 38.1323 | 0.0571  | 0.792194 |
| Whrn          | chr4:63414909-63495991    | 1.4477  | 1.5526  | 0.1009  | 0.742697 |
| Mtap          | chr4:89137121-89181081    | 18.9437 | 18.3263 | -0.0478 | 0.904018 |
| Alg6          | chr4:99715663-99763460    | 1.5194  | 1.6145  | 0.0876  | 0.619942 |
| Ssbp3         | chr4:106910700-107049694  | 13.9893 | 13.8237 | -0.0172 | 0.915694 |
| Tmem59        | chr4:107178398-107200996  | 42.5008 | 43.9542 | 0.0485  | 0.695213 |
| Lrrc42        | chr4:107233513-107253532  | 7.0101  | 6.6851  | -0.0685 | 0.900305 |
| Gm12737       | chr4:108513780-108516817  | 2.4133  | 2.7288  | 0.1772  | 0.773316 |
| Faah          | chr4:115967144-116017926  | 16.5248 | 16.2385 | -0.0252 | 0.904608 |
| Pomgnt1       | chr4:116123839-116159849  | 6.9252  | 7.1962  | 0.0554  | 0.594422 |
| Gbbp1l1       | chr4:116557657-116593882  | 48.6743 | 48.1106 | -0.0168 | 0.888188 |
| Rlf           | chr4:121145372-121215084  | 24.9968 | 24.7020 | -0.0171 | 0.914886 |
| Trim62        | chr4:128883579-128911328  | 0.7700  | 0.8603  | 0.1600  | 0.802050 |
| lqcc          | chr4:129615125-129619099  | 12.8141 | 12.5230 | -0.0332 | 0.899600 |
| Mir700        | chr4:135416554-135416633  | 25.3496 | 28.6059 | 0.1743  | 0.706344 |
| Pithd1        | chr4:135975459-135987264  | 16.6117 | 16.2525 | -0.0315 | 0.836161 |
| Mfap2         | chr4:141010417-141015984  | 0.5905  | 0.4692  | -0.3317 | 0.821208 |
| Gm13127       | chr4:144587243-144588632  | 2.1741  | 1.9447  | -0.1609 | 0.834638 |
| Agtrap        | chr4:148077060-148088031  | 9.2870  | 9.0246  | -0.0414 | 0.865307 |
| Apitd1        | chr4:149127120-149137629  | 2.3758  | 2.1535  | -0.1417 | 0.838287 |
| Gm13066       | chr4:149565619-149567790  | 1.4351  | 1.1876  | -0.2732 | 0.787899 |
| Slc25a33      | chr4:149744035-149774277  | 5.4088  | 5.1177  | -0.0798 | 0.835144 |
| Errf1         | chr4:150853918-150868892  | 3.2182  | 3.0548  | -0.0752 | 0.842150 |
| Chd5          | chr4:152338650-152390194  | 0.2018  | 0.1793  | -0.1704 | 0.697253 |
| Atad3aos      | chr4:155761177-155769264  | 2.2388  | 2.0197  | -0.1486 | 0.851845 |
| Zfp433        | chr10:81718918-81721468   | 1.7300  | 2.0128  | 0.2184  | 0.743238 |
| Tmtc2         | chr10:105187662-105574451 | 0.1877  | 0.1616  | -0.2157 | 0.805941 |
| Ebf1          | chr11:44617316-45008091   | 0.0750  | 0.0610  | -0.2996 | 0.785927 |
| Krt10         | chr11:99385253-99389364   | 0.4590  | 0.7232  | 0.6559  | 0.716872 |
| Abca5         | chr11:110269368-110337716 | 0.0496  | 0.0606  | 0.2896  | 0.745575 |
| Smim6         | chr11:115912016-115913920 | 1.3322  | 1.5746  | 0.2412  | 0.784420 |
| Wdr35         | chr12:8973891-9028847     | 0.6228  | 0.6962  | 0.1608  | 0.788796 |
| Gm16572       | chr12:81587798-81589640   | 3.3439  | 2.7951  | -0.2586 | 0.721408 |
| 4930451E10Rik | chr13:55775135-55784505   | 0.6521  | 0.8171  | 0.3253  | 0.707755 |
| C230066G23Rik | chr5:105580439-105581772  | 4.8248  | 5.7131  | 0.2438  | 0.836959 |
| P2rx2         | chr5:110339811-110343035  | 0.3056  | 0.3784  | 0.3080  | 0.784463 |
| Plekhf1       | chr7:38220653-38227994    | 0.7931  | 0.6800  | -0.2219 | 0.800290 |
| Gm15506       | chr7:98682335-98702928    | 0.7916  | 1.0267  | 0.3751  | 0.771029 |
| Klh35         | chr7:99466003-99474022    | 1.4485  | 1.6370  | 0.1765  | 0.829967 |
| Gm4980        | chr7:99624066-99627103    | 0.1633  | 0.2067  | 0.3401  | 0.658200 |
| Gm5903        | chr7:130343524-130354373  | 0.2072  | 0.1736  | -0.2555 | 0.814044 |
| Btbd16        | chr7:130774068-130825897  | 1.1366  | 1.3118  | 0.2069  | 0.829809 |
| Tnfrsf23      | chr7:143665808-143685872  | 0.4233  | 0.4997  | 0.2395  | 0.719634 |
| Gm15717       | chr8:69110470-69111244    | 3.2157  | 2.6108  | -0.3006 | 0.798477 |
| Matr3-ps2     | chr8:104845348-104846373  | 0.4649  | 0.6194  | 0.4138  | 0.762394 |
| Exoc3l        | chr8:105289923-105296098  | 0.6005  | 0.7289  | 0.2795  | 0.731003 |
| Mcam          | chr9:44134468-44142727    | 0.4911  | 0.5767  | 0.2318  | 0.790736 |
| Gm10655       | chr9:61370796-61372193    | 0.5351  | 0.6972  | 0.3819  | 0.806675 |
| Gm7327        | chrX:61785380-61786032    | 0.9171  | 1.1800  | 0.3636  | 0.782124 |
| C230037L18Rik | chr15:89476235-89484847   | 1.0946  | 1.2832  | 0.2294  | 0.819560 |
| Trav6-4       | chr14:53454295-53454782   | 3.0453  | 3.7011  | 0.2814  | 0.706687 |
| Mir15a        | chr14:61632026-61632110   | 8.3887  | 10.9801 | 0.3884  | 0.766942 |
| Slc15a1       | chr14:121459620-121505254 | 0.3361  | 0.4153  | 0.3054  | 0.752648 |
| Gm15599       | chr17:5110780-5112119     | 1.9155  | 1.6221  | -0.2398 | 0.839002 |
| Hspa1l        | chr17:34972702-34979284   | 1.0669  | 0.9301  | -0.1980 | 0.825166 |
| Nlrc4         | chr17:74426294-74459108   | 0.4137  | 0.3594  | -0.2029 | 0.819738 |
| Gm10093       | chr17:78491564-78493541   | 0.9808  | 0.8749  | -0.1649 | 0.811520 |
| Slc3a1        | chr17:85028346-85064243   | 1.1373  | 1.0138  | -0.1658 | 0.847851 |
| Tsga10ip      | chr19:5390048-5394401     | 2.2362  | 1.7765  | -0.3321 | 0.822549 |
| Gda           | chr19:21391306-21473445   | 0.2557  | 0.2992  | 0.2265  | 0.760670 |

|               |                           |          |          |         |          |
|---------------|---------------------------|----------|----------|---------|----------|
| Loxl4         | chr19:42593981-42612813   | 0.5042   | 0.4416   | -0.1911 | 0.827499 |
| Pyroxd2       | chr19:42725857-42752775   | 0.2456   | 0.1943   | -0.3385 | 0.747240 |
| Ap1s3         | chr1:79606875-79671972    | 1.4671   | 1.6714   | 0.1881  | 0.761652 |
| Gm15392       | chr1:121489295-121493203  | 1.3970   | 1.6618   | 0.2504  | 0.744740 |
| Nuak2         | chr1:132316125-132333488  | 1.2237   | 1.3767   | 0.1700  | 0.761957 |
| Scarna3a      | chr1:159340282-159340422  | 5.7329   | 6.9652   | 0.2809  | 0.723684 |
| Snph          | chr2:151590548-151632593  | 0.1433   | 0.1206   | -0.2495 | 0.773413 |
| Mroh8         | chr2:157208549-157279549  | 0.4067   | 0.3499   | -0.2172 | 0.821307 |
| Gm16147       | chr18:5611557-5611836     | 2.2961   | 1.7901   | -0.3592 | 0.826020 |
| Gm24514       | chr18:55622632-55622920   | 3.2966   | 3.8463   | 0.2225  | 0.651927 |
| Pstpip2       | chr18:77794544-77882007   | 0.4899   | 0.3641   | -0.4284 | 0.789037 |
| Gm15602       | chr3:103902526-103902963  | 3.0381   | 2.4842   | -0.2904 | 0.750225 |
| Ifi44         | chr3:151730921-151749947  | 1.2884   | 1.6345   | 0.3432  | 0.790710 |
| Gm26049       | chr4:41312090-41312198    | 7.8687   | 9.3131   | 0.2431  | 0.803810 |
| Gm12749       | chr4:109373700-109374859  | 1.1831   | 1.0129   | -0.2240 | 0.810682 |
| Arg1          | chr10:24915207-24927470   | 0.5853   | 0.4851   | -0.2707 | 0.821985 |
| Ank3          | chr10:69533771-70027438   | 0.0328   | 0.0259   | -0.3426 | 0.824571 |
| Hlf           | chr11:90336535-90390895   | 0.0930   | 0.1174   | 0.3361  | 0.780323 |
| Gkap1         | chr13:58233350-58274188   | 0.5550   | 0.4498   | -0.3032 | 0.799082 |
| Ninj2         | chr6:120093349-120200339  | 0.7270   | 0.9129   | 0.3285  | 0.784207 |
| Tmem25        | chr9:44793775-44799307    | 0.2569   | 0.2062   | -0.3173 | 0.823519 |
| n-R5s87       | chr9:96549593-96549709    | 6.8067   | 5.5730   | -0.2885 | 0.800640 |
| Gm8817        | chrX:167063193-167070380  | 1.8969   | 2.2964   | 0.2757  | 0.804183 |
| Wnt10b        | chr15:98771752-98778150   | 0.2859   | 0.2291   | -0.3198 | 0.796333 |
| Gm25406       | chr17:73193911-73194016   | 11.4191  | 9.6745   | -0.2392 | 0.828244 |
| Gm15738       | chr16:13384173-13404686   | 1.0143   | 1.2888   | 0.3455  | 0.734541 |
| Gm16299       | chr19:53819353-53825128   | 0.6515   | 0.7987   | 0.2939  | 0.847196 |
| Gm16072       | chr18:12287403-12289780   | 0.2693   | 0.2191   | -0.2977 | 0.784826 |
| Gm13529       | chr2:33652388-33652798    | 1.4853   | 1.8179   | 0.2915  | 0.775567 |
| Dnmt3l-ps1    | chr2:83744483-83745736    | 1.0032   | 1.2565   | 0.3248  | 0.792857 |
| Hspa12b       | chr2:131127279-131146321  | 0.2155   | 0.2712   | 0.3314  | 0.754171 |
| Gm12930       | chr4:124957646-124987009  | 1.2320   | 0.9464   | -0.3805 | 0.845972 |
| Lppr2         | chr9:21937032-21948900    | 0.1979   | 0.2426   | 0.2940  | 0.697429 |
| Rsl24d1       | chr9:73113425-73123333    | 13.6455  | 13.1409  | -0.0544 | 0.894642 |
| Txndc11       | chr16:11074910-11134650   | 6.2088   | 6.1253   | -0.0195 | 0.881654 |
| Sept7         | chr9:25252438-25308571    | 194.5696 | 200.8451 | 0.0458  | 0.834269 |
| Snora15       | chr5:129794545-129794676  | 12.7571  | 11.5123  | -0.1481 | 0.810484 |
| Trbj1-6       | chr6:41535553-41535606    | 352.9631 | 342.6659 | -0.0427 | 0.862806 |
| Kmt2e         | chr5:23434440-23504235    | 21.4258  | 21.1052  | -0.0218 | 0.937808 |
| NA            | chrX:42526584-42529330    | 1.3787   | 1.5065   | 0.1279  | 0.819287 |
| NA            | chr15:102528635-102529025 | 2.7698   | 2.4012   | -0.2060 | 0.807797 |
| Lsm12         | chr11:102162496-102185296 | 14.4477  | 15.1231  | 0.0659  | 0.824387 |
| Kctd2         | chr11:115420127-115431274 | 13.7633  | 13.5927  | -0.0180 | 0.762931 |
| Itsn2         | chr12:4593007-4713950     | 65.8344  | 67.5244  | 0.0366  | 0.600768 |
| Pi4k2b        | chr5:52741586-52769344    | 2.5242   | 2.3785   | -0.0858 | 0.895422 |
| Gm21983       | chr7:27168429-27181086    | 20.3319  | 19.8507  | -0.0346 | 0.899964 |
| Hbb-bs        | chr7:103826533-103828096  | 1.7044   | 1.4664   | -0.2170 | 0.815286 |
| Zfp689        | chr7:127443751-127449158  | 7.2342   | 6.9852   | -0.0505 | 0.870217 |
| Hras          | chr7:141189104-141194005  | 8.9977   | 8.7860   | -0.0344 | 0.889407 |
| Gm26786       | chr8:106237902-106425728  | 1.9084   | 2.0120   | 0.0763  | 0.759007 |
| Gm17324       | chr9:78447864-78448786    | 3.0334   | 2.8133   | -0.1087 | 0.739755 |
| Tceanc        | chrX:166499811-166518567  | 3.5033   | 3.4027   | -0.0421 | 0.879925 |
| Txndc16       | chr14:45134447-45220328   | 3.4169   | 3.3605   | -0.0240 | 0.813138 |
| 4833413E03Rik | chr17:31557125-31559113   | 0.7503   | 0.6390   | -0.2316 | 0.792653 |
| Fam162a       | chr16:36043843-36071515   | 44.9766  | 43.6788  | -0.0422 | 0.904503 |
| Matr3         | chr18:35562157-35592045   | 108.8100 | 107.6079 | -0.0160 | 0.939324 |
| 1700018M17Rik | chr4:59549153-59549625    | 20.4728  | 22.0186  | 0.1050  | 0.830864 |
| Camk2n1       | chr4:138454313-138460123  | 1.3354   | 1.2593   | -0.0846 | 0.861290 |
| Gm15477       | chr5:67847065-67909013    | 0.3018   | 0.2694   | -0.1637 | 0.814861 |
| Gm10232       | chr17:3043883-3044750     | 1.4285   | 1.7396   | 0.2842  | 0.808783 |
| Hint3         | chr10:30608140-30618479   | 13.9649  | 13.6045  | -0.0377 | 0.877187 |
| Nt5dc1        | chr10:34288287-34418552   | 26.7640  | 27.6667  | 0.0479  | 0.787856 |
| Zbtb24        | chr10:41450395-41465571   | 16.6817  | 16.4514  | -0.0201 | 0.901611 |
| Man1a         | chr10:53904787-54075796   | 28.4064  | 29.1281  | 0.0362  | 0.723995 |
| Ccar1         | chr10:62743927-62792368   | 34.5428  | 34.0449  | -0.0209 | 0.922620 |
| Tfam          | chr10:71225463-71238280   | 20.0272  | 20.7012  | 0.0478  | 0.802032 |
| Adora2a       | chr10:75316942-75334788   | 14.5630  | 14.3050  | -0.0258 | 0.914886 |
| Gucd1         | chr10:75351110-75517972   | 6.3372   | 6.5462   | 0.0468  | 0.788669 |
| D10Jhu81e     | chr10:78162066-78169768   | 26.9150  | 27.8444  | 0.0490  | 0.755052 |
| Mier2         | chr10:79540244-79555199   | 7.8655   | 8.1872   | 0.0578  | 0.790903 |
| Gm17134       | chr10:79863936-79864434   | 36.6895  | 38.2924  | 0.0617  | 0.773742 |

|               |                           |          |          |         |          |
|---------------|---------------------------|----------|----------|---------|----------|
| Med16         | chr10:79894707-79908923   | 5.8835   | 6.1140   | 0.0554  | 0.784146 |
| Hmg20b        | chr10:81346047-81350480   | 8.7518   | 8.6420   | -0.0182 | 0.880915 |
| Cpm           | chr10:117629499-117687352 | 13.9739  | 14.3817  | 0.0415  | 0.751196 |
| Mdm2          | chr10:117688887-117710758 | 26.0190  | 26.7003  | 0.0373  | 0.670453 |
| Stat2         | chr10:128270575-128292849 | 20.2043  | 20.8437  | 0.0449  | 0.782481 |
| Mtfp1         | chr11:4091479-4095445     | 1.5327   | 1.4196   | -0.1106 | 0.859416 |
| Rnf215        | chr11:4135201-4141172     | 15.7412  | 16.3289  | 0.0529  | 0.826426 |
| Lif           | chr11:4257556-4272514     | 2.5859   | 2.7230   | 0.0745  | 0.762133 |
| Asb3          | chr11:30954394-31102704   | 8.1194   | 8.0145   | -0.0188 | 0.926280 |
| Npm1          | chr11:33152286-33163206   | 132.5880 | 127.1447 | -0.0605 | 0.898971 |
| Lcp2          | chr11:34046919-34092295   | 97.1790  | 96.8042  | -0.0056 | 0.945865 |
| Thg1l         | chr11:45946842-45955494   | 6.8912   | 6.6589   | -0.0495 | 0.909467 |
| Tgtp1         | chr11:48985326-48994172   | 10.8670  | 10.6985  | -0.0226 | 0.901091 |
| Rnf130        | chr11:50025345-50104758   | 10.5479  | 11.1760  | 0.0834  | 0.834581 |
| 9530068E07Rik | chr11:52396427-52408728   | 25.0969  | 24.9285  | -0.0097 | 0.919949 |
| Slc36a3os     | chr11:55137043-55140193   | 8.4042   | 7.9513   | -0.0799 | 0.867446 |
| Cnot8         | chr11:58104152-58118594   | 25.1427  | 25.8456  | 0.0398  | 0.449798 |
| Plscr3        | chr11:69846375-69852058   | 1.8369   | 1.7694   | -0.0540 | 0.862149 |
| Pld2          | chr11:70540063-70558110   | 1.3223   | 1.2788   | -0.0482 | 0.911712 |
| Pfn1          | chr11:70651849-70654644   | 391.2601 | 402.8670 | 0.0422  | 0.818356 |
| Kif1c         | chr11:70700547-70731964   | 8.7330   | 9.0145   | 0.0458  | 0.823887 |
| P2rx5         | chr11:73160420-73172685   | 0.5595   | 0.6327   | 0.1775  | 0.756538 |
| Smg6          | chr11:74925822-75164448   | 17.3717  | 17.1862  | -0.0155 | 0.942214 |
| Mir22hg       | chr11:75461538-75466676   | 3.0743   | 2.9466   | -0.0612 | 0.874610 |
| Gemin4        | chr11:76210570-76217664   | 11.0333  | 10.8949  | -0.0182 | 0.921989 |
| Abr           | chr11:76416733-76622314   | 16.6531  | 17.2436  | 0.0503  | 0.826983 |
| Wsb1          | chr11:79239371-79254671   | 27.2284  | 27.1492  | -0.0045 | 0.953078 |
| Crlf3         | chr11:80046492-80080991   | 64.1420  | 63.8006  | -0.0077 | 0.926944 |
| Tefm          | chr11:80136677-80142175   | 4.5092   | 4.8865   | 0.1159  | 0.834845 |
| Ddx52         | chr11:83942061-83963088   | 34.9236  | 35.9870  | 0.0433  | 0.780988 |
| Cltc          | chr11:86694350-86757565   | 60.3703  | 61.8025  | 0.0338  | 0.663777 |
| Snf8          | chr11:96034884-96047430   | 12.5416  | 13.0892  | 0.0617  | 0.807595 |
| Skap1         | chr11:96464592-96759130   | 41.2453  | 42.2432  | 0.0345  | 0.687634 |
| Stat5b        | chr11:100780730-100850724 | 49.6359  | 51.0048  | 0.0393  | 0.772043 |
| Coa3          | chr11:101277967-101279114 | 32.7148  | 31.9385  | -0.0346 | 0.904636 |
| Wnt3          | chr11:103774149-103817957 | 1.3959   | 1.3221   | -0.0783 | 0.812305 |
| Gm11706       | chr11:106814669-106816008 | 9.5478   | 8.8238   | -0.1138 | 0.840257 |
| Fam104a       | chr11:113661318-113684155 | 13.4744  | 13.9305  | 0.0480  | 0.784219 |
| Rpl38         | chr11:114668523-114672331 | 6.6053   | 7.2278   | 0.1299  | 0.845238 |
| Exoc7         | chr11:116288000-116307233 | 14.9005  | 15.3876  | 0.0464  | 0.708323 |
| Jmjd6         | chr11:116837431-116843449 | 18.6352  | 18.4025  | -0.0181 | 0.925995 |
| Mettl23       | chr11:116843277-116854263 | 46.7812  | 46.2584  | -0.0162 | 0.949504 |
| Slc26a11      | chr11:119355556-119381079 | 2.4048   | 2.5182   | 0.0665  | 0.619731 |
| Sirt7         | chr11:120618371-120625240 | 37.5662  | 37.2716  | -0.0114 | 0.952854 |
| Kif3c         | chr12:3365131-3406494     | 5.7810   | 5.6918   | -0.0224 | 0.914412 |
| Rdh14         | chr12:10390779-10395562   | 15.3526  | 16.0810  | 0.0669  | 0.860205 |
| Ddx1          | chr12:13219307-13249213   | 54.6748  | 56.4998  | 0.0474  | 0.804590 |
| Grhl1         | chr12:24572286-24617391   | 6.2579   | 6.5178   | 0.0587  | 0.824364 |
| Gm17024       | chr12:40209486-40211073   | 5.1157   | 4.8180   | -0.0865 | 0.910663 |
| Heatr5a       | chr12:51875872-51971321   | 5.0043   | 4.9005   | -0.0302 | 0.929702 |
| Fbxo33        | chr12:59200654-59219725   | 22.4475  | 22.2886  | -0.0103 | 0.917144 |
| Fkbp3         | chr12:65062435-65073944   | 128.7718 | 127.2992 | -0.0166 | 0.946913 |
| Klhdc1        | chr12:69241175-69284632   | 6.7706   | 6.6287   | -0.0306 | 0.903057 |
| 2700049A03Rik | chr12:71136847-71243303   | 5.9395   | 6.1364   | 0.0470  | 0.744013 |
| 4933426M11Rik | chr12:80790531-80880832   | 25.9878  | 25.8177  | -0.0095 | 0.955664 |
| Synj2bp       | chr12:81497940-81532911   | 18.1746  | 18.0051  | -0.0135 | 0.933954 |
| Acyp1         | chr12:85272397-85288438   | 11.6019  | 11.3064  | -0.0372 | 0.831541 |
| Ttc7b         | chr12:100300770-100520822 | 4.8304   | 4.6937   | -0.0414 | 0.887626 |
| AK010878      | chr12:102719974-102757810 | 4.4402   | 4.3713   | -0.0226 | 0.916209 |
| Syne3         | chr12:104929948-105009809 | 13.5224  | 14.0721  | 0.0575  | 0.847231 |
| Ppp2r5c       | chr12:110485738-110583061 | 89.3980  | 89.0779  | -0.0052 | 0.963509 |
| Apopt1        | chr12:111713260-111754980 | 6.8746   | 6.7723   | -0.0216 | 0.905593 |
| Tex22         | chr12:113074501-113088917 | 1.1354   | 1.0182   | -0.1572 | 0.796038 |
| Gtpbp4        | chr13:8972070-8996017     | 44.3194  | 43.8265  | -0.0161 | 0.952935 |
| Tcrg-C1       | chr13:19214102-19216618   | 8.8336   | 9.5878   | 0.1182  | 0.868114 |
| Gpld1         | chr13:24943151-24990753   | 5.9307   | 5.8262   | -0.0256 | 0.894996 |
| Bphl          | chr13:34037640-34074074   | 8.0416   | 8.5321   | 0.0854  | 0.813109 |
| Mak           | chr13:41025119-41079706   | 0.1483   | 0.1770   | 0.2549  | 0.842927 |
| Cltb          | chr13:54592400-54611344   | 5.7229   | 5.9344   | 0.0524  | 0.631893 |
| B230219D22Rik | chr13:55693123-55703499   | 34.8584  | 34.5723  | -0.0119 | 0.920672 |
| Mir3074-1     | chr13:63301179-63301296   | 34.7109  | 32.5379  | -0.0933 | 0.806271 |

|               |                           |          |          |         |          |
|---------------|---------------------------|----------|----------|---------|----------|
| Rscan18       | chr13:67096612-67114028   | 1.0728   | 0.9967   | -0.1062 | 0.853046 |
| Zfp455        | chr13:67194505-67209298   | 3.1286   | 3.3063   | 0.0797  | 0.757933 |
| Zfp874b       | chr13:67471513-67484225   | 13.3181  | 13.1206  | -0.0216 | 0.927028 |
| Papd7         | chr13:69497958-69533839   | 7.5886   | 7.8565   | 0.0501  | 0.674959 |
| Lrrc14b       | chr13:74359577-74364005   | 2.0119   | 2.1410   | 0.0897  | 0.688385 |
| Papd4         | chr13:93147399-93192283   | 8.7328   | 9.1188   | 0.0624  | 0.801405 |
| Zbed3         | chr13:95325236-95337841   | 0.4565   | 0.5354   | 0.2302  | 0.864851 |
| Col4a3bp      | chr13:96542617-96640167   | 24.6084  | 24.4271  | -0.0107 | 0.953169 |
| Srek1         | chr13:103741614-103764504 | 19.4643  | 20.1214  | 0.0479  | 0.760975 |
| Gm17509       | chr13:117218700-117221075 | 7.3708   | 7.7287   | 0.0684  | 0.836689 |
| Slc25a40      | chr5:8422849-8454790      | 9.7931   | 9.5765   | -0.0323 | 0.924387 |
| Wdr86         | chr5:24711737-24730727    | 0.6347   | 0.5969   | -0.0886 | 0.858336 |
| Ppp1cb        | chr5:32458973-32517433    | 28.4465  | 28.2938  | -0.0078 | 0.964264 |
| Gm15513       | chr5:34211809-34213802    | 0.5171   | 0.4523   | -0.1932 | 0.855239 |
| Stx18         | chr5:38038741-38137765    | 6.1495   | 6.4122   | 0.0604  | 0.679918 |
| Shisa3        | chr5:67607882-67623552    | 0.6573   | 0.7129   | 0.1173  | 0.702760 |
| Exoc1         | chr5:76529310-76570294    | 12.7288  | 12.6386  | -0.0103 | 0.932432 |
| Scarb2        | chr5:92443872-92505608    | 42.1005  | 41.7039  | -0.0137 | 0.938052 |
| Klh8          | chr5:103861972-103911259  | 1.6631   | 1.7799   | 0.0979  | 0.807139 |
| Zfp644        | chr5:106500893-106697287  | 19.0325  | 19.5686  | 0.0401  | 0.824323 |
| Zfp932        | chr5:109996520-110010411  | 4.6339   | 4.9092   | 0.0832  | 0.836815 |
| Pole          | chr5:110286305-110337474  | 8.7334   | 8.9992   | 0.0433  | 0.811047 |
| A630023P12Rik | chr5:110514922-110525980  | 25.9540  | 27.1116  | 0.0630  | 0.854352 |
| Gm20636       | chr5:112374368-112377639  | 2.6243   | 2.9169   | 0.1525  | 0.710802 |
| Gm17122       | chr5:113842600-113843116  | 36.1891  | 35.4875  | -0.0282 | 0.858050 |
| Wsb2          | chr5:117357303-117378601  | 9.3809   | 9.7017   | 0.0485  | 0.736827 |
| Rpl6          | chr5:121204480-121209241  | 40.8368  | 42.2504  | 0.0491  | 0.849905 |
| Pptc7         | chr5:122284364-122324281  | 23.4040  | 23.2397  | -0.0102 | 0.896793 |
| Stx2          | chr5:128984556-129008574  | 2.4486   | 2.5763   | 0.0733  | 0.750356 |
| Tyw1          | chr5:130255618-130341563  | 5.8819   | 6.0996   | 0.0524  | 0.774764 |
| Por           | chr5:135670032-135735326  | 12.0529  | 12.4974  | 0.0522  | 0.758465 |
| Epo           | chr5:137482258-137533242  | 1.6282   | 1.4576   | -0.1596 | 0.875272 |
| Gigyf1        | chr5:137518879-137527934  | 7.5477   | 7.4047   | -0.0276 | 0.913399 |
| Zcwpw1        | chr5:137787797-137822621  | 6.9663   | 6.8052   | -0.0338 | 0.925787 |
| Gm15672       | chr5:139147575-139150693  | 2.8842   | 2.7025   | -0.0938 | 0.869755 |
| Rnf216        | chr5:142990892-143113020  | 13.0659  | 13.4961  | 0.0467  | 0.752787 |
| Copg2         | chr6:30747553-30896794    | 19.1815  | 19.7552  | 0.0425  | 0.804017 |
| Mtpn          | chr6:35508905-35539888    | 49.6125  | 51.1619  | 0.0444  | 0.796782 |
| Trbc1         | chr6:41538217-41539347    | 277.2924 | 275.1542 | -0.0112 | 0.939270 |
| Trbj2-2       | chr6:41542956-41543007    | 130.2922 | 125.0561 | -0.0592 | 0.837815 |
| Zfp777        | chr6:48024187-48048911    | 10.3596  | 10.7323  | 0.0510  | 0.754495 |
| Mturn         | chr6:54681771-54700406    | 11.4230  | 11.8904  | 0.0579  | 0.794780 |
| Avl9          | chr6:56714926-56761911    | 19.2303  | 19.7575  | 0.0390  | 0.672018 |
| Aup1          | chr6:83054652-83057680    | 89.8428  | 92.3424  | 0.0396  | 0.778138 |
| Nr2c2         | chr6:92091389-92173057    | 30.1070  | 30.0069  | -0.0048 | 0.941344 |
| Uba3          | chr6:97183669-97205642    | 24.0876  | 23.7651  | -0.0194 | 0.929027 |
| Eif4e3        | chr6:99625134-99666771    | 9.3880   | 9.7745   | 0.0582  | 0.750434 |
| Mkrn2         | chr6:115601937-115618670  | 21.9004  | 21.6655  | -0.0156 | 0.869450 |
| Plxnd1        | chr6:115954810-115995005  | 5.4739   | 5.6840   | 0.0544  | 0.832146 |
| Lpcat3        | chr6:124663026-124704418  | 12.8364  | 13.3170  | 0.0530  | 0.704189 |
| Cd4           | chr6:124864691-124888221  | 192.0906 | 191.8994 | -0.0014 | 0.986193 |
| Gapdh         | chr6:125161714-125166467  | 9.1549   | 9.4975   | 0.0530  | 0.779222 |
| 9330179D12Rik | chr6:127149388-127212411  | 2.4589   | 2.3317   | -0.0766 | 0.777204 |
| Epn1          | chr7:5080234-5098178      | 25.7987  | 25.5420  | -0.0144 | 0.926496 |
| Zfp78         | chr7:6371363-6379491      | 2.3321   | 2.2263   | -0.0670 | 0.839393 |
| Ptgir         | chr7:16906489-16910905    | 5.1124   | 4.9702   | -0.0407 | 0.884538 |
| Zfp109        | chr7:24228047-24236632    | 3.3565   | 3.6517   | 0.1216  | 0.881084 |
| Ethe1         | chr7:24587542-24608925    | 5.6401   | 6.1058   | 0.1145  | 0.825679 |
| Dedd2         | chr7:25202839-25219859    | 45.8279  | 45.2619  | -0.0179 | 0.924608 |
| Rab4b         | chr7:27168423-27178896    | 19.0689  | 18.6227  | -0.0342 | 0.909076 |
| Eid2b         | chr7:28277705-28280129    | 2.0308   | 1.9257   | -0.0767 | 0.892122 |
| Med29         | chr7:28386145-28392708    | 4.1698   | 3.8159   | -0.1279 | 0.862316 |
| Zfp420        | chr7:29859978-29877292    | 3.5139   | 3.7113   | 0.0789  | 0.823782 |
| Zfp14         | chr7:30038052-30044734    | 3.0401   | 3.2902   | 0.1140  | 0.803865 |
| E130208F15Rik | chr7:30321739-30323472    | 16.6527  | 16.3427  | -0.0271 | 0.873951 |
| Hspb6         | chr7:30552177-30555443    | 3.0531   | 3.2556   | 0.0926  | 0.814758 |
| Nudt19        | chr7:35547184-35556304    | 14.4304  | 14.1919  | -0.0240 | 0.936876 |
| Zfp507        | chr7:35772345-35802989    | 12.6523  | 12.5260  | -0.0145 | 0.914923 |
| Rpl18         | chr7:45715456-45720835    | 37.9669  | 39.2698  | 0.0487  | 0.869383 |
| Mphosph10     | chr7:64376575-64392268    | 21.2522  | 22.1378  | 0.0589  | 0.871074 |
| Mfge8         | chr7:79133768-79149060    | 5.4582   | 5.3000   | -0.0424 | 0.897575 |



|               |                          |          |          |         |          |
|---------------|--------------------------|----------|----------|---------|----------|
| Sema4b        | chr7:80186840-80226394   | 12.3859  | 12.2336  | -0.0179 | 0.923336 |
| Iqgap1        | chr7:80711582-80803331   | 95.1099  | 97.4167  | 0.0346  | 0.651424 |
| Il16          | chr7:83642847-83745726   | 96.3776  | 98.5845  | 0.0327  | 0.493540 |
| Mesdc1        | chr7:83880494-83884341   | 4.6307   | 4.8611   | 0.0700  | 0.819252 |
| Usp35         | chr7:97309379-97332020   | 1.9485   | 1.8821   | -0.0500 | 0.909167 |
| Rrp8          | chr7:105732206-105737376 | 15.6291  | 15.3460  | -0.0264 | 0.915465 |
| Wee1          | chr7:110122349-110142112 | 5.8686   | 5.6733   | -0.0488 | 0.923305 |
| Mettl9        | chr7:121034444-121076834 | 20.9076  | 20.4287  | -0.0334 | 0.919837 |
| Gm15489       | chr7:122139007-122159401 | 1.9400   | 1.7223   | -0.1718 | 0.889331 |
| Prkcb         | chr7:122288750-122634402 | 34.3364  | 34.1155  | -0.0093 | 0.949036 |
| Il21r         | chr7:125603428-125633570 | 78.4270  | 80.7631  | 0.0423  | 0.768467 |
| Zfp668        | chr7:127865169-127876828 | 9.0596   | 8.9048   | -0.0249 | 0.894299 |
| Armc5         | chr7:128237356-128245100 | 8.4783   | 8.7917   | 0.0524  | 0.758770 |
| Fam53b        | chr7:132712081-132813886 | 23.5435  | 24.2479  | 0.0425  | 0.819419 |
| Bccip         | chr7:133709332-133721145 | 19.5905  | 20.3828  | 0.0572  | 0.844888 |
| Gm15542       | chr7:140890886-140892080 | 2.5037   | 2.7334   | 0.1266  | 0.703324 |
| Pidd1         | chr7:141438112-141444025 | 2.9252   | 3.0654   | 0.0676  | 0.769846 |
| Cttn          | chr7:144435732-144471009 | 1.4193   | 1.5241   | 0.1027  | 0.835137 |
| Grtp1         | chr8:13176868-13200624   | 1.1361   | 1.2761   | 0.1676  | 0.746217 |
| Upf3a         | chr8:13785614-13798538   | 21.9705  | 21.4959  | -0.0315 | 0.890222 |
| Angpt2        | chr8:18690262-18741562   | 1.1711   | 1.2599   | 0.1055  | 0.839239 |
| Gm21092       | chr8:20550330-20581999   | 1.4760   | 1.4236   | -0.0522 | 0.807191 |
| D830025C05Rik | chr8:25597011-25597989   | 2.9184   | 2.7212   | -0.1010 | 0.855891 |
| Gm9939        | chr8:34965051-34966209   | 4.5652   | 5.0072   | 0.1333  | 0.871146 |
| Fbxo8         | chr8:56551089-56592393   | 8.0661   | 8.3900   | 0.0568  | 0.765311 |
| Gdf1          | chr8:70315774-70331592   | 1.1204   | 1.0473   | -0.0973 | 0.865438 |
| Lsm4          | chr8:70673247-70678752   | 62.6152  | 64.5114  | 0.0430  | 0.784284 |
| Ccdc124       | chr8:70868226-70873490   | 44.2393  | 43.6155  | -0.0205 | 0.931356 |
| Ptger1        | chr8:83666832-83672753   | 26.6203  | 27.4401  | 0.0438  | 0.794639 |
| Calr          | chr8:84841849-84846934   | 229.3423 | 235.7782 | 0.0399  | 0.761569 |
| Hook2         | chr8:84990594-85003364   | 4.6942   | 4.5469   | -0.0460 | 0.908406 |
| Asna1         | chr8:85017933-85025278   | 46.8242  | 46.0909  | -0.0228 | 0.933990 |
| Wdr83os       | chr8:85080739-85082339   | 16.7522  | 17.7263  | 0.0815  | 0.848954 |
| Kifc3         | chr8:95099831-95142540   | 0.7829   | 0.7305   | -0.1000 | 0.732091 |
| Grp           | chr8:105566699-105568298 | 2.2644   | 2.5053   | 0.1459  | 0.684297 |
| Ctcf          | chr8:105636567-105682922 | 58.0753  | 59.5234  | 0.0355  | 0.610366 |
| Thap11        | chr8:105855102-105856950 | 17.9151  | 18.5208  | 0.0480  | 0.776912 |
| Pskh1         | chr8:105900440-105931778 | 13.6954  | 14.1316  | 0.0452  | 0.738073 |
| Cmc2          | chr8:116888684-116921455 | 4.6654   | 4.9136   | 0.0748  | 0.725433 |
| Gan           | chr8:117158134-117205834 | 2.6034   | 2.8006   | 0.1053  | 0.823870 |
| Zdhhc7        | chr8:120081094-120101482 | 14.9452  | 14.7241  | -0.0215 | 0.932531 |
| Gm27021       | chr8:120608785-120668079 | 5.0531   | 4.8040   | -0.0729 | 0.852331 |
| Galns         | chr8:122578237-122611487 | 8.9584   | 8.6773   | -0.0460 | 0.927900 |
| Acsf3         | chr8:122775504-122817880 | 6.7475   | 7.0755   | 0.0685  | 0.720130 |
| Fam89a        | chr8:124740256-124751809 | 1.8217   | 1.6704   | -0.1250 | 0.865279 |
| Msantd4       | chr9:4383534-4386861     | 18.2523  | 18.8468  | 0.0462  | 0.763984 |
| Piwi4         | chr9:14696229-14740733   | 0.1242   | 0.1465   | 0.2383  | 0.812118 |
| Gm24357       | chr9:15315521-15315595   | 86.6262  | 82.8976  | -0.0635 | 0.876841 |
| Cdkn2d        | chr9:21288462-21291209   | 22.3345  | 23.3974  | 0.0671  | 0.838058 |
| Vps26b        | chr9:27004502-27030094   | 24.1869  | 24.8104  | 0.0367  | 0.669407 |
| Sc5d          | chr9:42254176-42264300   | 27.0437  | 26.6332  | -0.0221 | 0.928201 |
| Nlrx1         | chr9:44252712-44268599   | 4.4458   | 4.3349   | -0.0365 | 0.915760 |
| Vps11         | chr9:44348105-44361670   | 25.7134  | 25.4339  | -0.0158 | 0.939060 |
| Ptpn9         | chr9:56994967-57062805   | 8.6919   | 8.9711   | 0.0456  | 0.513480 |
| Neil1         | chr9:57143255-57147034   | 11.0531  | 11.7869  | 0.0927  | 0.822953 |
| Commd4        | chr9:57155040-57158299   | 47.8391  | 47.2238  | -0.0187 | 0.936957 |
| Nptn          | chr9:58582239-58657955   | 18.2124  | 18.0876  | -0.0099 | 0.940946 |
| Tipin         | chr9:64281606-64304792   | 44.0139  | 43.0201  | -0.0329 | 0.919025 |
| Vwa9          | chr9:64960831-64986974   | 15.2274  | 15.7308  | 0.0469  | 0.651374 |
| Dpp8          | chr9:65032457-65082650   | 48.9614  | 48.7409  | -0.0065 | 0.919232 |
| Snx1          | chr9:66088132-66126587   | 28.7335  | 28.5006  | -0.0117 | 0.928745 |
| Senp6         | chr9:80066902-80144953   | 42.4935  | 43.6461  | 0.0386  | 0.754510 |
| BC043934      | chr9:96435783-96437434   | 12.4148  | 12.1757  | -0.0281 | 0.888714 |
| Cep63         | chr9:102586577-102626534 | 5.8260   | 6.0427   | 0.0527  | 0.787602 |
| Oxsr1         | chr9:119238431-119322427 | 22.8785  | 22.7540  | -0.0079 | 0.934454 |
| Gm24044       | chr9:120128779-120128935 | 57.5033  | 55.5325  | -0.0503 | 0.854038 |
| 2010204K13Rik | chrX:7411816-7445143     | 1.8585   | 2.0592   | 0.1479  | 0.830591 |
| Maoa          | chrX:16619697-16687818   | 0.4874   | 0.4294   | -0.1829 | 0.842243 |
| Cdk16         | chrX:20687953-20699880   | 8.7416   | 8.6426   | -0.0164 | 0.881033 |
| Gm26593       | chrX:21360864-21364622   | 1.0625   | 1.1876   | 0.1605  | 0.765144 |
| Zfp449        | chrX:56346399-56365674   | 0.5951   | 0.6560   | 0.1406  | 0.767846 |

|               |                           |         |         |         |          |
|---------------|---------------------------|---------|---------|---------|----------|
| Mtm1          | chrX:71210766-71315691    | 1.2840  | 1.3677  | 0.0912  | 0.850571 |
| Bcap31        | chrX:73686177-73716175    | 89.9036 | 92.7354 | 0.0447  | 0.806541 |
| Lage3         | chrX:74351275-74353618    | 7.1184  | 7.5520  | 0.0853  | 0.893487 |
| Foxo4         | chrX:101254527-101260873  | 12.4008 | 12.2347 | -0.0194 | 0.945412 |
| Atrx          | chrX:105797614-105929397  | 54.4577 | 54.1190 | -0.0090 | 0.950542 |
| Morf4l2       | chrX:136732941-136743690  | 15.8019 | 16.3517 | 0.0493  | 0.838140 |
| Fam199x       | chrX:137049593-137082503  | 6.2619  | 6.1792  | -0.0192 | 0.948476 |
| Ubqln2        | chrX:153498231-153501537  | 3.3086  | 3.2259  | -0.0365 | 0.829921 |
| Tars          | chr15:11383662-11399658   | 54.0393 | 53.7519 | -0.0077 | 0.954961 |
| Zfr           | chr15:12117830-12185683   | 34.0074 | 33.8682 | -0.0059 | 0.943475 |
| Rpl30         | chr15:34440504-34443640   | 30.4244 | 31.5472 | 0.0523  | 0.866903 |
| Spag1         | chr15:36179367-36235610   | 2.7652  | 2.9477  | 0.0922  | 0.844740 |
| Tbc1d31       | chr15:57912198-57970067   | 3.2297  | 3.1571  | -0.0328 | 0.917410 |
| Pvt1          | chr15:62037985-62378096   | 4.5711  | 4.4818  | -0.0285 | 0.909057 |
| Ly6c2         | chr15:75108159-75111684   | 3.7037  | 4.0744  | 0.1376  | 0.812231 |
| Gpaa1         | chr15:76331230-76334907   | 13.4790 | 13.2749 | -0.0220 | 0.905142 |
| Lrrc24        | chr15:76715275-76722173   | 1.8557  | 1.9854  | 0.0974  | 0.657540 |
| Gm16575       | chr15:79739573-79741798   | 16.8349 | 17.4222 | 0.0495  | 0.791088 |
| Gm6612        | chr15:80952504-80952899   | 3.3555  | 2.9543  | -0.1837 | 0.807228 |
| St13          | chr15:81363668-81400077   | 66.9094 | 65.7958 | -0.0242 | 0.941417 |
| Rangap1       | chr15:81704247-81729919   | 51.6670 | 52.9612 | 0.0357  | 0.573540 |
| Cyb5r3        | chr15:83153493-83172592   | 12.6580 | 13.1129 | 0.0509  | 0.854310 |
| Chkb          | chr15:89416404-89429908   | 9.5009  | 9.7902  | 0.0433  | 0.713730 |
| Slc11a2       | chr15:100387897-100425072 | 5.4820  | 5.4074  | -0.0198 | 0.928937 |
| Smug1         | chr15:103153306-103158002 | 5.8740  | 6.1171  | 0.0585  | 0.801692 |
| Psmc6         | chr14:14112183-14120984   | 36.9570 | 36.5675 | -0.0153 | 0.947917 |
| Polr3a        | chr14:24448693-24487046   | 16.2370 | 16.7758 | 0.0471  | 0.778855 |
| Prkcd         | chr14:30595355-30626210   | 19.1990 | 19.1248 | -0.0056 | 0.935228 |
| Rft1          | chr14:30654359-30691317   | 6.4879  | 6.3956  | -0.0207 | 0.892947 |
| Colq          | chr14:31523081-31591343   | 2.3653  | 2.2900  | -0.0467 | 0.874744 |
| Ncoa4         | chr14:32159864-32179855   | 2.6825  | 2.8378  | 0.0812  | 0.846021 |
| Wdfy4         | chr14:32959546-33185508   | 0.3077  | 0.2869  | -0.1014 | 0.894988 |
| Bmpr1a        | chr14:34410733-34503341   | 0.4450  | 0.4098  | -0.1187 | 0.823233 |
| Gch1          | chr14:47153894-47189413   | 5.0563  | 5.2755  | 0.0612  | 0.753704 |
| Wdhd1         | chr14:47240943-47276832   | 7.5267  | 7.7538  | 0.0429  | 0.736662 |
| Supt16        | chr14:52160418-52197239   | 70.5324 | 70.1462 | -0.0079 | 0.961007 |
| Trav14n-3     | chr14:53370295-53370575   | 10.6261 | 11.5976 | 0.1262  | 0.672272 |
| Trav7-4       | chr14:53461098-53461736   | 3.0754  | 3.5012  | 0.1871  | 0.785989 |
| Traj9         | chr14:54209392-54209450   | 73.9222 | 79.0061 | 0.0960  | 0.771046 |
| Slc7a7        | chr14:54369443-54409472   | 1.8467  | 1.7492  | -0.0783 | 0.872593 |
| 4931414P19Rik | chr14:54583662-54605908   | 1.6802  | 1.8047  | 0.1031  | 0.595461 |
| Ints6         | chr14:62676329-62761112   | 27.7728 | 27.4992 | -0.0143 | 0.923052 |
| Fam167a       | chr14:63436393-63465498   | 0.3649  | 0.4053  | 0.1515  | 0.832131 |
| Fndc3a        | chr14:72537945-72710003   | 9.4931  | 9.7652  | 0.0408  | 0.706077 |
| Dnajc15       | chr14:77826216-77874917   | 53.9910 | 56.7310 | 0.0714  | 0.876588 |
| Cln5          | chr14:103070215-103077579 | 18.1636 | 17.8930 | -0.0217 | 0.893102 |
| Zfp677        | chr17:21383747-21399265   | 12.0602 | 12.5973 | 0.0629  | 0.813754 |
| Zfp51         | chr17:21450351-21465591   | 21.1473 | 21.8983 | 0.0503  | 0.763919 |
| Zfp52         | chr17:21555045-21562066   | 33.1907 | 32.7126 | -0.0209 | 0.927190 |
| Prss41        | chr17:23836784-23844172   | 1.0119  | 0.9177  | -0.1410 | 0.875475 |
| Msrb1         | chr17:24736641-24742778   | 19.5472 | 20.3917 | 0.0610  | 0.804486 |
| Itfg3         | chr17:26211821-26244223   | 5.3365  | 5.5767  | 0.0635  | 0.803697 |
| Hmga1         | chr17:27556619-27563674   | 5.3863  | 5.2409  | -0.0395 | 0.890954 |
| H2-K2         | chr17:33974785-33978788   | 29.1034 | 30.1963 | 0.0532  | 0.810649 |
| Nrm           | chr17:35861317-35865402   | 15.9312 | 16.5494 | 0.0549  | 0.726701 |
| H2-M10.2      | chr17:36284226-36286490   | 0.6233  | 0.5004  | -0.3168 | 0.849566 |
| Runx2os1      | chr17:44735844-44737612   | 3.2340  | 2.9378  | -0.1386 | 0.865695 |
| Mea1          | chr17:46681136-46683105   | 59.9952 | 62.1280 | 0.0504  | 0.846707 |
| Dpp9          | chr17:56186681-56218889   | 13.1262 | 12.9916 | -0.0149 | 0.923605 |
| A930029G22Rik | chr17:69416659-69439304   | 1.8343  | 1.9937  | 0.1202  | 0.795615 |
| Sos1          | chr17:80393751-80480453   | 4.2230  | 4.1568  | -0.0228 | 0.927102 |
| Prkce         | chr17:86167784-86657919   | 2.2619  | 2.2133  | -0.0313 | 0.917379 |
| Mgrn1         | chr16:4886099-4938296     | 15.9157 | 15.7159 | -0.0182 | 0.921121 |
| Gm15868       | chr16:14311840-14314014   | 10.8913 | 11.6395 | 0.0959  | 0.781477 |
| Gnb1l         | chr16:18498767-18566679   | 2.3036  | 2.4584  | 0.0939  | 0.806378 |
| NA            | chr16:20677316-20677395   | 11.5499 | 13.5868 | 0.2343  | 0.841997 |
| Rfc4          | chr16:23113942-23127737   | 18.0510 | 17.8027 | -0.0200 | 0.878898 |
| Opa1          | chr16:29579333-29654884   | 21.4681 | 21.2886 | -0.0121 | 0.937437 |
| Fbxo45        | chr16:32230111-32247158   | 8.6287  | 8.4972  | -0.0222 | 0.887027 |
| Dir2          | chr16:35694061-35769356   | 5.0945  | 5.0114  | -0.0237 | 0.886959 |
| Gtf2e1        | chr16:37509789-37539789   | 6.2414  | 6.4605  | 0.0498  | 0.716937 |

|               |                          |          |          |         |          |
|---------------|--------------------------|----------|----------|---------|----------|
| NA            | chr16:43620876-43623955  | 2.8328   | 2.9977   | 0.0816  | 0.858525 |
| Gm6030        | chr16:45205099-45205501  | 16.1082  | 17.6781  | 0.1342  | 0.846445 |
| Gm15638       | chr16:45945605-45971370  | 1.5046   | 1.4368   | -0.0665 | 0.913554 |
| Gm16892       | chr16:57167400-57174413  | 4.8614   | 4.6470   | -0.0651 | 0.886566 |
| Paxbp1        | chr16:91014036-91044543  | 41.0380  | 40.8346  | -0.0072 | 0.927602 |
| Syt12         | chr19:4445907-4477447    | 0.1155   | 0.0943   | -0.2927 | 0.809253 |
| Sart1         | chr19:5377522-5388703    | 34.3876  | 35.4642  | 0.0445  | 0.792208 |
| Mus81         | chr19:5482344-5488402    | 12.1455  | 12.6071  | 0.0538  | 0.810784 |
| 2700081O15Rik | chr19:7417624-7425904    | 0.5432   | 0.5034   | -0.1097 | 0.882218 |
| Pat1          | chr19:11912398-11945096  | 8.5256   | 8.8632   | 0.0560  | 0.846989 |
| Mpeg1         | chr19:12460778-12465284  | 0.7609   | 0.8365   | 0.1368  | 0.835339 |
| Cep78         | chr19:15955773-15984989  | 5.2662   | 5.1127   | -0.0427 | 0.906996 |
| Cstf2t        | chr19:31082840-31086590  | 30.5309  | 31.4647  | 0.0435  | 0.810767 |
| Gm27042       | chr19:40589434-40594862  | 2.4422   | 2.2351   | -0.1278 | 0.843913 |
| Gm16541       | chr19:42536849-42563108  | 11.5199  | 12.2177  | 0.0848  | 0.733469 |
| Chuk          | chr19:44073334-44107480  | 26.4350  | 26.2010  | -0.0128 | 0.941462 |
| 2010012O05Rik | chr19:46689905-46703382  | 1.9407   | 2.1156   | 0.1245  | 0.813513 |
| Fam204a       | chr19:60198585-60226697  | 11.3967  | 11.9408  | 0.0673  | 0.791918 |
| Nanos1        | chr19:60755986-60759913  | 4.8580   | 5.0502   | 0.0560  | 0.804801 |
| Sbspon        | chr1:15853861-15892722   | 0.9147   | 0.8527   | -0.1012 | 0.873151 |
| Boll          | chr1:55248657-55363469   | 1.3795   | 1.4998   | 0.1206  | 0.873450 |
| Ppil3         | chr1:58430993-58445486   | 19.6356  | 19.2773  | -0.0266 | 0.899161 |
| Bmpr2         | chr1:59764278-59870549   | 3.5806   | 3.7654   | 0.0726  | 0.818691 |
| Ccnyl1        | chr1:64690454-64725644   | 1.2124   | 1.1479   | -0.0789 | 0.825476 |
| Acadl         | chr1:66830838-66863277   | 16.1796  | 16.7141  | 0.0469  | 0.639150 |
| Nhej1         | chr1:74967138-75046639   | 3.4424   | 3.6950   | 0.1022  | 0.797795 |
| Hes6          | chr1:91411482-91414038   | 15.8130  | 15.5444  | -0.0247 | 0.920851 |
| Gin1          | chr1:97770171-97793709   | 3.6534   | 3.5381   | -0.0463 | 0.927582 |
| Rbbp5         | chr1:132477366-132505665 | 27.0556  | 27.8367  | 0.0411  | 0.683207 |
| Gm10535       | chr1:135108960-135113378 | 5.4072   | 5.0216   | -0.1067 | 0.902512 |
| Fam20b        | chr1:156678544-156719001 | 11.0712  | 11.3969  | 0.0418  | 0.781106 |
| NA            | chr1:167223826-167223919 | 52.8221  | 56.5546  | 0.0985  | 0.763017 |
| Aldh9a1       | chr1:167349990-167368530 | 15.9479  | 16.4817  | 0.0475  | 0.780333 |
| Sdhc          | chr1:171127164-171150603 | 15.5077  | 16.2279  | 0.0655  | 0.855491 |
| Nr1i3         | chr1:171213969-171220701 | 5.9057   | 6.1568   | 0.0601  | 0.678050 |
| Pfdn2         | chr1:171345669-171359254 | 5.0191   | 4.8165   | -0.0594 | 0.869592 |
| Klhdc9        | chr1:171358445-171360798 | 1.1079   | 1.2249   | 0.1449  | 0.729089 |
| Gm10521       | chr1:171895663-171898237 | 3.6527   | 3.9350   | 0.1074  | 0.868247 |
| Desi2         | chr1:178187416-178252598 | 16.8892  | 16.7614  | -0.0110 | 0.914344 |
| 2210411M09Rik | chr1:180952063-180958149 | 7.6958   | 8.2098   | 0.0933  | 0.754166 |
| Fbxo28        | chr1:182313101-182341606 | 17.8585  | 17.7788  | -0.0065 | 0.931206 |
| Mfsd7b        | chr1:191005831-191026190 | 13.4095  | 13.2663  | -0.0155 | 0.920385 |
| Ppp2r5a       | chr1:191351980-191397041 | 91.9857  | 91.0787  | -0.0143 | 0.948524 |
| Gm26879       | chr1:192092371-192099630 | 5.0439   | 5.4521   | 0.1123  | 0.831267 |
| Gypc          | chr18:32528321-32560034  | 14.6865  | 15.2288  | 0.0523  | 0.759999 |
| Spata24       | chr18:35656689-35662186  | 5.5341   | 5.9447   | 0.1032  | 0.825366 |
| Ankhd1        | chr18:36559886-36665917  | 32.1678  | 32.0271  | -0.0063 | 0.964111 |
| Yipf5         | chr18:40204864-40219399  | 13.6745  | 13.4451  | -0.0244 | 0.879368 |
| Ythdc2        | chr18:44828664-44889720  | 10.4838  | 10.8532  | 0.0500  | 0.843451 |
| Gm4951        | chr18:60212079-60247820  | 9.0203   | 8.3594   | -0.1098 | 0.889984 |
| Spire1        | chr18:67488208-67552777  | 0.5391   | 0.4929   | -0.1293 | 0.827950 |
| 4930503L19Rik | chr18:70453139-70472480  | 19.8816  | 20.5856  | 0.0502  | 0.809527 |
| Nrarp         | chr2:25180757-25183330   | 2.4970   | 2.6609   | 0.0917  | 0.818638 |
| Gm20532       | chr2:26586638-26635634   | 3.1453   | 3.4339   | 0.1267  | 0.768060 |
| Hmcn2         | chr2:31314414-31460738   | 0.1594   | 0.1772   | 0.1526  | 0.826628 |
| Tor2a         | chr2:32757233-32762244   | 14.6674  | 14.5133  | -0.0152 | 0.915521 |
| Pbx3          | chr2:34171456-34373140   | 0.5964   | 0.6467   | 0.1168  | 0.835425 |
| Arpc5l        | chr2:39008075-39015877   | 27.9294  | 27.8322  | -0.0050 | 0.958431 |
| Stam2         | chr2:52691663-52742281   | 8.5240   | 8.4375   | -0.0147 | 0.922030 |
| Dpp4          | chr2:62330072-62412231   | 25.9773  | 26.7163  | 0.0405  | 0.762493 |
| Nfe2l2        | chr2:75675512-75704641   | 12.8559  | 12.6860  | -0.0192 | 0.907293 |
| Chrm4         | chr2:91922188-91929829   | 2.1729   | 2.0378   | -0.0926 | 0.898146 |
| Ext2          | chr2:93695630-93822568   | 7.5939   | 7.8889   | 0.0550  | 0.776289 |
| Ttc17         | chr2:94300766-94406689   | 9.4907   | 9.3819   | -0.0166 | 0.933595 |
| Caprin1       | chr2:103762940-103797649 | 52.3913  | 53.7931  | 0.0381  | 0.740468 |
| Zfp770        | chr2:114193460-114201469 | 4.0838   | 4.2512   | 0.0580  | 0.822858 |
| Sptbn5        | chr2:120046156-120085772 | 0.0573   | 0.0706   | 0.3018  | 0.805038 |
| Atp8b4        | chr2:126320972-126500674 | 1.7910   | 1.9575   | 0.1283  | 0.865318 |
| Gpat2         | chr2:127425198-127436092 | 1.7755   | 1.6767   | -0.0827 | 0.873770 |
| Mgme1         | chr2:144270662-144281227 | 3.4364   | 3.6275   | 0.0781  | 0.790083 |
| Xrn2          | chr2:147012995-147078000 | 106.8067 | 109.5774 | 0.0369  | 0.810109 |

|               |                           |         |         |         |          |
|---------------|---------------------------|---------|---------|---------|----------|
| Gzf1          | chr2:148681022-148692949  | 11.7630 | 11.6169 | -0.0180 | 0.914251 |
| Mmp24         | chr2:155775341-155818366  | 2.4349  | 2.5777  | 0.0822  | 0.770099 |
| 1110008F13Rik | chr2:156863127-156873563  | 25.6855 | 26.5001 | 0.0450  | 0.672190 |
| Tti1          | chr2:157981802-158028433  | 15.3796 | 15.1906 | -0.0178 | 0.917042 |
| Stk4          | chr2:164070321-164155524  | 93.1010 | 92.8372 | -0.0041 | 0.947204 |
| Gm23201       | chr2:167064997-167065086  | 60.2303 | 65.4577 | 0.1201  | 0.814850 |
| Pard6b        | chr2:168081003-168101203  | 1.8512  | 1.9757  | 0.0939  | 0.803080 |
| Spo11         | chr2:172977699-172993576  | 3.6197  | 3.4609  | -0.0647 | 0.893427 |
| Gm14325       | chr2:177831790-177840336  | 4.1405  | 3.9583  | -0.0649 | 0.756636 |
| Uckl1os       | chr2:181578479-181585170  | 8.6058  | 8.9881  | 0.0627  | 0.842753 |
| Pex2          | chr3:5560187-5576239      | 16.5967 | 17.2150 | 0.0528  | 0.731925 |
| Gm16093       | chr3:19227779-19240987    | 14.4010 | 15.3910 | 0.0959  | 0.745760 |
| Tbl1xr1       | chr3:22076651-22216594    | 40.4424 | 41.4125 | 0.0342  | 0.649718 |
| Pgrmc2        | chr3:41066325-41083046    | 8.3841  | 8.2030  | -0.0315 | 0.920341 |
| Mrpl24        | chr3:87919505-87923672    | 64.9976 | 64.4926 | -0.0113 | 0.938865 |
| Gatad2b       | chr3:90341653-90358120    | 9.0338  | 8.8070  | -0.0367 | 0.876412 |
| S100a1        | chr3:90511033-90514392    | 3.8289  | 3.5577  | -0.1060 | 0.833073 |
| Gm17690       | chr3:96167463-96172414    | 4.7154  | 4.5848  | -0.0405 | 0.903468 |
| Spag17        | chr3:99885405-100143322   | 1.2738  | 1.2387  | -0.0403 | 0.848077 |
| Mettl14       | chr3:123364644-123385990  | 6.3662  | 6.2235  | -0.0327 | 0.924624 |
| Aimp1         | chr3:132660497-132683879  | 48.8400 | 50.8126 | 0.0571  | 0.867776 |
| Gstcd         | chr3:132981752-133092033  | 3.5907  | 3.5036  | -0.0354 | 0.910264 |
| Manba         | chr3:135485610-135571404  | 6.7915  | 6.6997  | -0.0196 | 0.873187 |
| Dnajb4        | chr3:152178510-152210279  | 3.1663  | 3.0520  | -0.0530 | 0.895502 |
| Gm16213       | chr3:152920239-152921399  | 2.3054  | 2.6340  | 0.1923  | 0.824646 |
| Sdcbp         | chr4:6365649-6408423      | 31.4152 | 32.3772 | 0.0435  | 0.838761 |
| Rad54b        | chr4:11558919-11615805    | 2.2442  | 2.1631  | -0.0531 | 0.897359 |
| Lymm2         | chr4:32800252-32801559    | 14.1047 | 14.9351 | 0.0825  | 0.865200 |
| Kif24         | chr4:41390744-41464887    | 1.6674  | 1.7671  | 0.0838  | 0.866176 |
| Aldh1b1       | chr4:45799021-45804604    | 3.2118  | 3.4252  | 0.0928  | 0.818711 |
| Palm2Akap2    | chr4:57568178-57896982    | 1.8732  | 1.8160  | -0.0447 | 0.913504 |
| Megf9         | chr4:70427064-70534995    | 0.7825  | 0.8351  | 0.0939  | 0.870965 |
| Ttc4          | chr4:106662255-106678944  | 21.5541 | 21.2946 | -0.0175 | 0.923100 |
| Zcchc11       | chr4:108459425-108559421  | 15.4506 | 15.3079 | -0.0134 | 0.933787 |
| Gm25788       | chr4:123291343-123291474  | 11.0529 | 9.9046  | -0.1583 | 0.845861 |
| Stk40         | chr4:126103956-126141029  | 11.4252 | 11.8393 | 0.0514  | 0.832973 |
| Phc2          | chr4:128654701-128752881  | 8.8227  | 8.7548  | -0.0111 | 0.920415 |
| S100pbp       | chr4:129148004-129189727  | 10.2120 | 10.5409 | 0.0457  | 0.798768 |
| Gm22767       | chr4:132838382-132838547  | 10.2633 | 11.3656 | 0.1472  | 0.839193 |
| Runx3         | chr4:135120651-135177990  | 2.4862  | 2.6654  | 0.1004  | 0.889268 |
| Pnrc2         | chr4:135870917-135873850  | 94.5061 | 97.1111 | 0.0392  | 0.767372 |
| Cnr2          | chr4:135895393-135920207  | 5.8377  | 5.6876  | -0.0376 | 0.905731 |
| Minos1        | chr4:139101813-139131113  | 9.1786  | 8.9004  | -0.0444 | 0.919616 |
| Zbtb17        | chr4:141444653-141467930  | 14.0250 | 13.8484 | -0.0183 | 0.938128 |
| Mthfr         | chr4:148039076-148059551  | 4.3140  | 4.4943  | 0.0591  | 0.788159 |
| lcmt          | chr4:152297226-152307121  | 11.1359 | 10.9471 | -0.0247 | 0.916461 |
| Gm11539       | chr11:96248632-96249189   | 1.1530  | 1.3432  | 0.2202  | 0.776708 |
| Hoxb3         | chr11:96323325-96346685   | 0.3281  | 0.2891  | -0.1827 | 0.833052 |
| Tcam1         | chr11:106276671-106288745 | 0.3632  | 0.4173  | 0.2005  | 0.831268 |
| Gm17586       | chr11:120633767-120635125 | 1.3965  | 1.2190  | -0.1962 | 0.824833 |
| Gpr137b       | chr13:13357622-13393624   | 0.4147  | 0.3705  | -0.1628 | 0.860664 |
| Trgv2         | chr13:19336572-19337026   | 4.2981  | 3.9015  | -0.1397 | 0.848275 |
| Ccdc146       | chr5:21292960-21424677    | 0.2330  | 0.2711  | 0.2183  | 0.811455 |
| Pxmp2         | chr5:110274281-110286186  | 1.8783  | 2.1436  | 0.1906  | 0.822369 |
| Gm15747       | chr5:123393648-123397957  | 3.4853  | 3.1452  | -0.1481 | 0.889136 |
| 5430402O13Rik | chr6:50566642-50594865    | 1.5671  | 1.8143  | 0.2114  | 0.797572 |
| Zfp784        | chr7:5034438-5038446      | 3.1919  | 3.8314  | 0.2634  | 0.691965 |
| Gm9990        | chr7:97720838-97722924    | 1.0269  | 0.9283  | -0.1456 | 0.840349 |
| Prss8         | chr7:127925724-127930113  | 0.7181  | 0.6512  | -0.1412 | 0.851367 |
| Snord111      | chr8:110838527-110838616  | 21.0577 | 18.9574 | -0.1516 | 0.871245 |
| Gm25630       | chr9:35474884-35475046    | 3.8225  | 4.6280  | 0.2759  | 0.851662 |
| Gm5648        | chrX:121334987-121336574  | 0.4952  | 0.4344  | -0.1889 | 0.827235 |
| Tmsb15b1      | chrX:136974021-136976874  | 5.1157  | 5.7926  | 0.1793  | 0.813764 |
| Gm20405       | chr15:65857868-65858356   | 3.2862  | 3.8544  | 0.2301  | 0.766799 |
| Csf2rb        | chr15:78325989-78351000   | 0.1658  | 0.1402  | -0.2423 | 0.826307 |
| Trav7-d-3     | chr14:52744248-52744839   | 1.9928  | 1.6788  | -0.2474 | 0.772378 |
| Trav16        | chr14:53743103-53743706   | 4.4653  | 4.0096  | -0.1553 | 0.846808 |
| Traj43        | chr14:54174741-54174798   | 49.8639 | 45.5613 | -0.1302 | 0.904742 |
| Gm26536       | chr14:62836907-62838207   | 1.3625  | 1.2064  | -0.1756 | 0.848595 |
| Gm20109       | chr17:28522380-28523148   | 0.8593  | 1.0973  | 0.3527  | 0.792146 |
| Gm9493        | chr19:23619741-23620320   | 0.9834  | 1.1617  | 0.2404  | 0.802759 |

|               |                           |         |         |         |          |
|---------------|---------------------------|---------|---------|---------|----------|
| Gm13423       | chr2:23202032-23203683    | 2.6521  | 2.4227  | -0.1306 | 0.868364 |
| Gm14023       | chr2:129297369-129307826  | 0.3850  | 0.3174  | -0.2786 | 0.832589 |
| Gm26771       | chr3:83773852-83789956    | 2.8719  | 3.2134  | 0.1621  | 0.835718 |
| Pde5a         | chr3:122729157-122859374  | 0.2191  | 0.1959  | -0.1620 | 0.858586 |
| Gm11942       | chr4:32964887-32965232    | 1.9791  | 2.2977  | 0.2153  | 0.752890 |
| Tspan1        | chr4:116161868-116167601  | 0.6096  | 0.7195  | 0.2391  | 0.827873 |
| Tlr12         | chr4:128615445-128618619  | 1.3944  | 1.5305  | 0.1344  | 0.841606 |
| Gm13251       | chr4:146449022-146470292  | 0.4296  | 0.4929  | 0.1983  | 0.860947 |
| Gm12243       | chr11:57572511-57574595   | 0.8297  | 0.6768  | -0.2938 | 0.858044 |
| 4933424L21Rik | chr11:57623697-57649494   | 0.6234  | 0.5394  | -0.2088 | 0.870572 |
| 4930544D05Rik | chr11:70615847-70616890   | 0.7893  | 0.6649  | -0.2475 | 0.876237 |
| Gm11527       | chr11:95858161-95859174   | 1.1590  | 1.3751  | 0.2467  | 0.839842 |
| Gm11657       | chr11:107994021-107994631 | 2.5521  | 3.0866  | 0.2743  | 0.830000 |
| Nsg1          | chr5:38137192-38159467    | 0.4702  | 0.5515  | 0.2299  | 0.852224 |
| Gm16938       | chr7:98177193-98185597    | 0.3302  | 0.3736  | 0.1782  | 0.825684 |
| Gm7027        | chr7:101573459-101574321  | 1.5821  | 1.3627  | -0.2154 | 0.861909 |
| Gm10602       | chr7:101836750-101837363  | 1.6420  | 1.9071  | 0.2159  | 0.862630 |
| 2310010G23Rik | chrX:36814770-36817185    | 0.6946  | 0.8552  | 0.3002  | 0.808016 |
| Gm14549       | chrX:36814770-36817200    | 0.6845  | 0.8428  | 0.3002  | 0.808016 |
| Tpt1-ps6      | chrX:101768534-101769057  | 1.3324  | 1.5158  | 0.1860  | 0.793171 |
| Abra          | chr15:41865292-41869720   | 0.3712  | 0.4446  | 0.2602  | 0.826454 |
| Mustn1        | chr14:30879256-30881608   | 0.7521  | 0.9272  | 0.3020  | 0.801965 |
| 2310016D23Rik | chr1:60778842-60803790    | 1.9118  | 1.6310  | -0.2292 | 0.786134 |
| Dnm3          | chr1:161982452-162478034  | 0.0622  | 0.0736  | 0.2411  | 0.829661 |
| Ptgs1         | chr2:36230425-36252272    | 0.2456  | 0.2084  | -0.2370 | 0.880307 |
| Gm10964       | chr3:103739365-103746376  | 9.1613  | 7.8564  | -0.2217 | 0.869613 |
| 1700060J05Rik | chr4:53562982-53564697    | 0.8920  | 0.7719  | -0.2087 | 0.872504 |
| NA            | chr11:75696390-75696461   | 8.6428  | 7.4160  | -0.2209 | 0.658370 |
| E130304I02Rik | chr7:35802592-35803027    | 1.3275  | 1.5593  | 0.2322  | 0.715524 |
| Mical1        | chr10:41476313-41487032   | 28.5116 | 29.2801 | 0.0384  | 0.790811 |
| Gm11944       | chr11:3308995-3320722     | 3.5971  | 3.3768  | -0.0912 | 0.916390 |
| Grb7          | chr11:98446393-98455373   | 2.6427  | 2.7834  | 0.0748  | 0.821373 |
| Nin           | chr12:70011434-70111925   | 28.8966 | 29.6090 | 0.0351  | 0.754594 |
| Zkscan14      | chr5:145194945-145201868  | 10.5033 | 10.3517 | -0.0210 | 0.910919 |
| Aktip         | chr8:91112040-91134465    | 19.9954 | 19.8009 | -0.0141 | 0.935536 |
| 9530077C05Rik | chr9:22411576-22444677    | 0.6519  | 0.7382  | 0.1795  | 0.803793 |
| Ulk3          | chr9:57589451-57596233    | 6.6227  | 6.4829  | -0.0308 | 0.934936 |
| Myg1          | chr15:102331708-102338139 | 16.8676 | 17.3527 | 0.0409  | 0.700303 |
| Trav4-3       | chr14:53598907-53599410   | 2.6520  | 3.0772  | 0.2146  | 0.865087 |
| Mir3082       | chr17:25831364-25831428   | 88.7495 | 93.7567 | 0.0792  | 0.713108 |
| Hmgn1         | chr16:96120617-96127729   | 13.1225 | 13.6624 | 0.0582  | 0.873696 |
| Gm26686       | chr1:128770598-128774421  | 0.2890  | 0.2445  | -0.2414 | 0.887634 |
| Rnpep         | chr1:135262711-135284084  | 19.5908 | 20.1757 | 0.0424  | 0.805735 |
| Pydc3         | chr1:173673674-173698392  | 15.6122 | 16.1704 | 0.0507  | 0.866537 |
| 4930535I16Rik | chr4:123917503-123918022  | 1.9210  | 2.1977  | 0.1942  | 0.841632 |
| Cep85         | chr4:134129857-134187112  | 10.4173 | 10.7447 | 0.0446  | 0.838563 |
| Tcf25         | chr8:123373823-123404173  | 91.4801 | 93.7247 | 0.0350  | 0.753252 |
| Brpf3         | chr17:28801089-28838546   | 2.2991  | 2.2406  | -0.0372 | 0.920250 |
| Psmg1         | chr16:95979932-95990960   | 22.2035 | 21.9073 | -0.0194 | 0.932161 |
| Gm2178        | chr14:26514553-26514910   | 2.2915  | 2.0234  | -0.1796 | 0.839443 |
| Smc1b         | chr15:85064690-85131957   | 0.1283  | 0.1578  | 0.2985  | 0.833111 |
| Tbc1d1        | chr5:64159450-64351486    | 17.8288 | 17.7302 | -0.0080 | 0.960501 |
| Gpx4          | chr10:80047165-80056439   | 10.3223 | 10.7630 | 0.0603  | 0.862500 |
| Acadvl        | chr11:70010182-70015411   | 35.6778 | 36.6770 | 0.0399  | 0.742971 |
| Glod4         | chr11:76120986-76243725   | 13.6506 | 14.0993 | 0.0467  | 0.843793 |
| F730043M19Rik | chr12:33111710-33147597   | 14.5242 | 15.0535 | 0.0516  | 0.878713 |
| Gm21971       | chr12:102673016-102727333 | 3.4914  | 3.3680  | -0.0519 | 0.932707 |
| Skiv2l2       | chr13:112867779-112927380 | 37.6962 | 37.4769 | -0.0084 | 0.958556 |
| NA            | chr5:5781529-5783607      | 1.1229  | 1.0387  | -0.1125 | 0.863513 |
| Gm26825       | chr5:5781529-5783636      | 1.1518  | 1.0653  | -0.1125 | 0.863513 |
| Nat14         | chr7:4922250-4925006      | 1.0132  | 1.1322  | 0.1603  | 0.852081 |
| Cldnd2        | chr7:43440781-43443328    | 2.1683  | 1.9479  | -0.1546 | 0.874496 |
| Gdpd5         | chr7:99381548-99460983    | 8.3454  | 8.1759  | -0.0296 | 0.933596 |
| Gga2          | chr7:121986721-122021222  | 1.0401  | 1.0909  | 0.0688  | 0.767915 |
| Gm17169       | chr8:81790557-81790908    | 16.1948 | 15.5460 | -0.0590 | 0.911719 |
| D230025D16Rik | chr8:105225144-105253053  | 6.7036  | 6.9160  | 0.0450  | 0.740551 |
| Dcun1d5       | chr9:7184565-7207031      | 75.4758 | 75.0655 | -0.0079 | 0.954823 |
| Eme2          | chr17:24888485-24895087   | 19.3045 | 19.8512 | 0.0403  | 0.806182 |
| Cyp4f17       | chr17:32506461-32528894   | 3.9265  | 3.7360  | -0.0718 | 0.908240 |
| Arl6          | chr16:59612948-59639391   | 1.7288  | 1.8560  | 0.1024  | 0.805345 |
| Pcyox1l       | chr18:61696836-61707635   | 1.7319  | 1.6355  | -0.0826 | 0.903833 |

|               |                           |          |          |         |          |
|---------------|---------------------------|----------|----------|---------|----------|
| Mdk           | chr2:91929804-91932297    | 3.3628   | 3.1704   | -0.0850 | 0.906804 |
| NA            | chr4:108622928-108625216  | 11.0596  | 10.9072  | -0.0200 | 0.918672 |
| Gucy2g        | chr19:55198296-55241236   | 0.3651   | 0.4056   | 0.1518  | 0.735713 |
| Pawr          | chr10:108332188-108414391 | 0.4323   | 0.5263   | 0.2838  | 0.856319 |
| Zfp672        | chr11:58315113-58323346   | 12.1141  | 12.4597  | 0.0406  | 0.620025 |
| Camk1         | chr6:113334123-113343984  | 0.7924   | 0.7558   | -0.0682 | 0.872431 |
| Rdm1          | chr11:101627194-101636100 | 10.9611  | 10.7184  | -0.0323 | 0.913526 |
| Gm17193       | chr12:84922541-84923512   | 3.5365   | 3.3237   | -0.0895 | 0.883828 |
| Tes3-ps       | chr13:49493614-49494819   | 1.4085   | 1.5345   | 0.1237  | 0.756384 |
| Wdr41         | chr13:94976343-95023314   | 5.0200   | 5.2403   | 0.0620  | 0.838423 |
| Ephx4         | chr5:107402735-107430035  | 0.7062   | 0.7827   | 0.1483  | 0.680102 |
| Flt3          | chr5:147330740-147400489  | 0.1608   | 0.1480   | -0.1202 | 0.773228 |
| Gm13835       | chr6:31141978-31142663    | 6.1933   | 6.6369   | 0.0998  | 0.823886 |
| Gm26625       | chr6:47546665-47551704    | 3.4398   | 3.6412   | 0.0821  | 0.830478 |
| Rpsud3        | chr6:113415318-113419348  | 4.3777   | 4.2452   | -0.0443 | 0.897660 |
| Cmtm4         | chr8:104348190-104395807  | 3.6001   | 3.5300   | -0.0284 | 0.921027 |
| Fam149b       | chr14:20348161-20383489   | 17.5116  | 17.3845  | -0.0105 | 0.955469 |
| Gm16538       | chr19:5727205-5731627     | 9.1037   | 8.6839   | -0.0681 | 0.905794 |
| Gm4956        | chr1:21285245-21298312    | 102.9275 | 106.0204 | 0.0427  | 0.882554 |
| Zfand2b       | chr1:75168645-75171629    | 10.5345  | 10.3406  | -0.0268 | 0.926632 |
| Cops8         | chr1:90603424-90613341    | 29.3749  | 29.1289  | -0.0121 | 0.931977 |
| Agps          | chr2:75832176-75931350    | 14.5557  | 14.9150  | 0.0352  | 0.765109 |
| Cks2          | chr13:51645231-51650660   | 1.1408   | 1.3238   | 0.2147  | 0.833960 |
| Ctla2b        | chr13:60895350-60897447   | 1.5652   | 1.7838   | 0.1886  | 0.870716 |
| NA            | chr1:193207749-193254474  | 4.4751   | 4.0523   | -0.1432 | 0.834791 |
| BC026585      | chr1:157458579-157489060  | 0.8684   | 0.9958   | 0.1975  | 0.877800 |
| Kdf1          | chr4:133518962-133530790  | 0.3044   | 0.3662   | 0.2669  | 0.872021 |
| Gm16210       | chr10:39752258-39752868   | 2.5100   | 2.3054   | -0.1227 | 0.862090 |
| Hace1         | chr10:45577828-45712345   | 4.5783   | 4.5525   | -0.0081 | 0.952603 |
| Tbcd32        | chr10:56014297-56228689   | 1.6867   | 1.6450   | -0.0361 | 0.921516 |
| Fam49a        | chr12:12262138-12376359   | 16.8116  | 17.2543  | 0.0375  | 0.766432 |
| Coq6          | chr12:84361656-84373796   | 6.9123   | 6.7997   | -0.0237 | 0.936559 |
| Fos           | chr12:85473889-85477273   | 5.8380   | 6.1656   | 0.0788  | 0.874857 |
| 1700001K19Rik | chr12:110667688-110682619 | 1.4979   | 1.6669   | 0.1542  | 0.850614 |
| Eif5          | chr12:111538100-111546753 | 76.1353  | 75.8612  | -0.0052 | 0.976049 |
| Tcrg-V4       | chr13:19184980-19185501   | 4.5040   | 4.0203   | -0.1639 | 0.867723 |
| Gm26877       | chr13:41359970-41370908   | 4.7213   | 4.4311   | -0.0915 | 0.919377 |
| Hiat1         | chr13:65064662-65112982   | 21.1049  | 21.6752  | 0.0385  | 0.813219 |
| Mob1b         | chr5:88720854-88762058    | 3.6527   | 3.7605   | 0.0420  | 0.714709 |
| Pilra         | chr5:137821951-137836268  | 1.1182   | 1.2089   | 0.1125  | 0.860739 |
| Taf6          | chr5:138178616-138187451  | 16.9261  | 16.7681  | -0.0135 | 0.946874 |
| Gm26938       | chr5:139807977-139826407  | 5.2344   | 5.0455   | -0.0530 | 0.802301 |
| Zfp12         | chr5:143235162-143248834  | 9.0819   | 9.3389   | 0.0403  | 0.729716 |
| Ica1          | chr6:8630526-8778488      | 1.8500   | 1.9655   | 0.0873  | 0.822091 |
| Sumf1         | chr6:108107027-108185582  | 6.4343   | 6.2971   | -0.0311 | 0.941349 |
| Dcp1b         | chr6:119175251-119221614  | 5.7868   | 5.9579   | 0.0420  | 0.405622 |
| Trpm4         | chr7:45303154-45333780    | 4.4836   | 4.3929   | -0.0295 | 0.927819 |
| Fes           | chr7:80377757-80387946    | 1.0080   | 1.0850   | 0.1062  | 0.807519 |
| Spn           | chr7:127132231-127137823  | 231.3361 | 236.7705 | 0.0335  | 0.800320 |
| Gm1840        | chr8:5639583-5640996      | 2.3784   | 2.2713   | -0.0665 | 0.818294 |
| Wdr83         | chr8:85075034-85081306    | 12.6982  | 12.5825  | -0.0132 | 0.948616 |
| Fam96b        | chr8:104639838-104641965  | 25.9719  | 26.8769  | 0.0494  | 0.836389 |
| Gm8116        | chr9:78820422-78821892    | 0.6010   | 0.6835   | 0.1856  | 0.804649 |
| Xlr4c         | chrX:73233687-73243130    | 3.7036   | 3.5464   | -0.0626 | 0.906169 |
| Zc3h7b        | chr15:81744847-81796269   | 7.3859   | 7.2904   | -0.0188 | 0.935195 |
| Creld2        | chr15:88819645-88826681   | 21.0042  | 21.8126  | 0.0545  | 0.820999 |
| Zmiz1os1      | chr14:25455736-25461128   | 1.1922   | 1.2735   | 0.0952  | 0.838225 |
| Ddhd1         | chr14:45593173-45658143   | 8.0390   | 8.3184   | 0.0493  | 0.849950 |
| Rb1           | chr14:73183672-73325822   | 27.2083  | 27.9346  | 0.0380  | 0.812383 |
| Tmprss3       | chr17:31179271-31198975   | 0.3913   | 0.4463   | 0.1897  | 0.842414 |
| Gm26510       | chr17:70874351-70924996   | 6.4269   | 6.2702   | -0.0356 | 0.891732 |
| Epas1         | chr17:86753906-86833410   | 0.3073   | 0.3373   | 0.1345  | 0.837805 |
| Nrros         | chr16:32142784-32165594   | 24.9290  | 25.5814  | 0.0373  | 0.796143 |
| Atg2a         | chr19:6241667-6262335     | 8.9250   | 8.8579   | -0.0109 | 0.957060 |
| Mgea5         | chr19:45750260-45783520   | 101.4130 | 101.3859 | -0.0004 | 0.996366 |
| Atic          | chr1:71557149-71579631    | 27.1816  | 27.0949  | -0.0046 | 0.973897 |
| Zfp281        | chr1:136624900-136630053  | 43.9451  | 43.8568  | -0.0029 | 0.979319 |
| Taf3          | chr2:9914551-10048596     | 3.2196   | 3.1610   | -0.0265 | 0.924394 |
| Gm14137       | chr2:119174508-119177575  | 1.4633   | 1.3950   | -0.0689 | 0.922189 |
| Gm14212       | chr2:126864502-126865328  | 2.8270   | 2.5999   | -0.1208 | 0.879979 |
| Mkks          | chr2:136873779-136891389  | 7.0178   | 7.3075   | 0.0584  | 0.839850 |

|               |                           |         |          |         |          |
|---------------|---------------------------|---------|----------|---------|----------|
| Toe1          | chr4:116794309-116807640  | 17.5649 | 17.2907  | -0.0227 | 0.946673 |
| Zfp691        | chr4:119169512-119174195  | 2.3385  | 2.4745   | 0.0815  | 0.805758 |
| NA            | chr15:62217540-62219403   | 0.8752  | 0.9914   | 0.1799  | 0.873106 |
| Trav4-2       | chr14:53418348-53418872   | 1.4754  | 1.7628   | 0.2568  | 0.803307 |
| Appbp2os      | chr11:85235170-85238304   | 1.8680  | 2.1081   | 0.1745  | 0.793920 |
| Zfp579        | chr7:4983482-4996158      | 1.4141  | 1.3553   | -0.0613 | 0.912773 |
| Twf2          | chr9:106203107-106215387  | 71.4503 | 71.1293  | -0.0065 | 0.967708 |
| Ndufb4        | chr16:37647169-37654453   | 7.7735  | 8.2131   | 0.0794  | 0.862024 |
| Gpr155        | chr2:73341505-73386572    | 7.3773  | 7.6650   | 0.0552  | 0.867698 |
| Ralgapb       | chr2:158409847-158499253  | 15.1819 | 15.1579  | -0.0023 | 0.980341 |
| Eepd1         | chr9:25481546-25604110    | 0.4753  | 0.4299   | -0.1446 | 0.894525 |
| Cep83         | chr10:94688789-94790336   | 20.5983 | 21.2807  | 0.0470  | 0.862794 |
| Agap2         | chr10:127078906-127093169 | 31.5440 | 32.3995  | 0.0386  | 0.848602 |
| Senp3         | chr11:69673114-69682084   | 23.0224 | 22.9151  | -0.0067 | 0.957072 |
| Cbx8          | chr11:119036304-119040969 | 4.2750  | 4.1957   | -0.0270 | 0.900562 |
| Dancr         | chr5:74093059-74095405    | 5.2287  | 5.1318   | -0.0270 | 0.866294 |
| Cit           | chr5:115845277-116008947  | 1.5923  | 1.6631   | 0.0628  | 0.902749 |
| Cops7a        | chr6:124958412-124965538  | 16.5183 | 16.3799  | -0.0121 | 0.948342 |
| Strap         | chr6:137735077-137751932  | 38.6637 | 39.7660  | 0.0406  | 0.836562 |
| G730046D07Rik | chr7:126565918-126566380  | 21.1670 | 20.6099  | -0.0385 | 0.914858 |
| Tcta          | chr9:108302958-108305951  | 8.0913  | 8.4218   | 0.0578  | 0.768729 |
| Exosc7        | chr9:123113214-123136129  | 17.3671 | 17.1017  | -0.0222 | 0.934252 |
| Wdr45         | chrX:7721972-7728201      | 11.2220 | 11.6082  | 0.0488  | 0.768797 |
| Zdhhc9        | chrX:48171968-48208878    | 1.0675  | 1.1189   | 0.0678  | 0.705806 |
| Tmem65        | chr15:58782268-58823530   | 16.6989 | 17.1773  | 0.0407  | 0.817685 |
| Irga5         | chr15:103344288-103366763 | 0.8301  | 0.8885   | 0.0981  | 0.810077 |
| Mtmr6         | chr14:60265204-60302370   | 29.6668 | 29.4840  | -0.0089 | 0.958855 |
| Fam188a       | chr2:12347262-12419469    | 13.7835 | 13.6772  | -0.0112 | 0.956395 |
| Sox12         | chr2:152393610-152398063  | 0.2760  | 0.3105   | 0.1699  | 0.864043 |
| Gm12454       | chr4:43504427-43508747    | 2.4625  | 2.3143   | -0.0896 | 0.875709 |
| Gm14636       | chrX:19156980-19167241    | 0.3090  | 0.2830   | -0.1266 | 0.899944 |
| Clybl         | chr14:122181693-122402232 | 1.9121  | 2.0970   | 0.1332  | 0.852643 |
| AA474331      | chr10:39890017-39899238   | 4.1538  | 4.3247   | 0.0582  | 0.816579 |
| Adamts14      | chr10:61197111-61273438   | 0.1426  | 0.1632   | 0.1947  | 0.811890 |
| Socs3         | chr11:117966078-117970047 | 59.8010 | 61.7400  | 0.0460  | 0.874918 |
| Cox7c         | chr13:86044815-86046904   | 17.0430 | 16.6721  | -0.0318 | 0.927790 |
| Mtx3          | chr13:92844786-92858230   | 7.4555  | 7.6899   | 0.0447  | 0.796554 |
| Gm15519       | chr6:112563641-112565207  | 0.6579  | 0.5986   | -0.1364 | 0.860992 |
| Cln8          | chr8:14881334-14901720    | 2.0336  | 1.9847   | -0.0352 | 0.921531 |
| Puf60         | chr15:76070183-76080946   | 99.0762 | 101.5428 | 0.0355  | 0.807893 |
| Apoa1bp       | chr3:88056522-88058495    | 40.5599 | 41.8203  | 0.0441  | 0.844733 |
| 2010016118Rik | chr3:106482012-106483437  | 69.2881 | 68.8660  | -0.0088 | 0.969836 |
| Spata6        | chr4:111719983-111829184  | 7.5084  | 7.4498   | -0.0113 | 0.959741 |
| Gm12036       | chr11:20729419-20729949   | 4.9238  | 4.5555   | -0.1121 | 0.891268 |
| 2010109103Rik | chr15:74878335-74881704   | 0.9436  | 0.8500   | -0.1508 | 0.870527 |
| Traj38        | chr14:54180573-54180635   | 20.3680 | 23.0834  | 0.1806  | 0.876305 |
| Kntc1         | chr5:123749725-123821593  | 8.0086  | 7.9090   | -0.0181 | 0.943887 |
| Trpc2         | chr7:102065510-102096864  | 5.6709  | 5.6374   | -0.0086 | 0.949297 |
| Vps35         | chr8:85260396-85299513    | 48.6365 | 49.8698  | 0.0361  | 0.828636 |
| Grasp         | chr15:101224206-101232755 | 2.4245  | 2.3360   | -0.0536 | 0.889406 |
| Ntn1          | chr11:68209363-68400823   | 2.8771  | 2.9854   | 0.0533  | 0.773436 |
| Hdac5         | chr11:102194431-102230166 | 3.5131  | 3.4626   | -0.0209 | 0.946628 |
| Fam179b       | chr12:64965741-65022573   | 14.7465 | 15.1301  | 0.0371  | 0.761504 |
| 2810474O19Rik | chr6:149309413-149335658  | 78.7911 | 78.5489  | -0.0044 | 0.977545 |
| Mrpl46        | chr7:78775235-78783531    | 18.0806 | 17.7646  | -0.0254 | 0.942480 |
| 4933406J10Rik | chr7:82743367-82755644    | 0.9819  | 1.1129   | 0.1806  | 0.875454 |
| Hook3         | chr8:26021420-26119224    | 12.2920 | 12.5913  | 0.0347  | 0.771122 |
| Gm22107       | chr15:77840656-77840756   | 20.3731 | 21.9651  | 0.1085  | 0.864593 |
| Fam109b       | chr15:82338941-82345743   | 1.6428  | 1.5800   | -0.0562 | 0.880620 |
| Zbed4         | chr15:88751659-88784516   | 1.0647  | 1.1277   | 0.0830  | 0.829918 |
| Ripk3         | chr14:55784995-55788857   | 32.2456 | 31.9156  | -0.0148 | 0.951307 |
| Dusp5         | chr19:53529108-53542431   | 39.3827 | 38.9995  | -0.0141 | 0.961418 |
| NA            | chr1:119526424-119528224  | 20.3170 | 20.0610  | -0.0183 | 0.946725 |
| Surf4         | chr2:26920039-26933928    | 69.7032 | 71.2531  | 0.0317  | 0.705332 |
| Insrr         | chr3:87796950-87816101    | 0.3617  | 0.3336   | -0.1168 | 0.885299 |
| Gm26857       | chr4:3678116-3689548      | 0.2823  | 0.3152   | 0.1592  | 0.821241 |
| 1700040L02Rik | chr10:68430952-68541896   | 1.0427  | 1.1750   | 0.1723  | 0.818830 |
| Gm20488       | chr5:149368475-149430682  | 0.4715  | 0.4327   | -0.1238 | 0.882258 |
| Gm14232       | chr2:131159536-131171342  | 1.6728  | 1.5282   | -0.1305 | 0.834087 |
| Morf411       | chr9:90091670-90114820    | 9.4970  | 9.3456   | -0.0232 | 0.906192 |
| E130308A19Rik | chr4:59626210-59761439    | 2.8075  | 2.9160   | 0.0547  | 0.886949 |

|               |                           |          |          |         |          |
|---------------|---------------------------|----------|----------|---------|----------|
| Cnksr3        | chr10:7119062-7212237     | 3.1397   | 3.0894   | -0.0233 | 0.935043 |
| Aig1          | chr10:13647053-13868980   | 2.6250   | 2.7119   | 0.0470  | 0.794335 |
| Hmgb1-ps8     | chr10:22262741-22263367   | 82.1027  | 81.6404  | -0.0081 | 0.964425 |
| Akap7         | chr10:25169089-25307870   | 2.5088   | 2.6131   | 0.0588  | 0.867093 |
| Ccdc162       | chr10:41538845-41709300   | 0.1907   | 0.2108   | 0.1444  | 0.867412 |
| Gm20441       | chr10:75771450-75780954   | 10.2582  | 10.7112  | 0.0623  | 0.855898 |
| Sgta          | chr10:81044074-81060178   | 24.6606  | 24.3930  | -0.0157 | 0.954870 |
| Celf5         | chr10:81459226-81482709   | 0.1131   | 0.1000   | -0.1772 | 0.892148 |
| Gm17249       | chr10:84619331-84622578   | 2.1444   | 2.2627   | 0.0775  | 0.772133 |
| Cfap54        | chr10:92775618-93081618   | 0.2761   | 0.2678   | -0.0443 | 0.925506 |
| Spryd4        | chr10:128209907-128211794 | 9.6080   | 9.9941   | 0.0568  | 0.876944 |
| Fam161a       | chr11:23007530-23030788   | 0.4170   | 0.4504   | 0.1112  | 0.873318 |
| Gm25296       | chr11:48800865-48800932   | 22.8813  | 20.9408  | -0.1279 | 0.876022 |
| Canx          | chr11:50293960-50325673   | 126.9773 | 129.9425 | 0.0333  | 0.870189 |
| Rmnd5b        | chr11:51623670-51635896   | 23.9381  | 24.6676  | 0.0433  | 0.833261 |
| Gpx3          | chr11:54902452-54910377   | 2.7957   | 3.0165   | 0.1097  | 0.897658 |
| Gm12256       | chr11:58889709-58891548   | 23.8537  | 23.2321  | -0.0381 | 0.932156 |
| Mrpl55        | chr11:59202485-59206134   | 12.7608  | 13.3182  | 0.0617  | 0.790276 |
| Gid4          | chr11:60417144-60450927   | 8.7976   | 8.7472   | -0.0083 | 0.969342 |
| Usp22         | chr11:61151784-61175055   | 15.0397  | 14.9840  | -0.0053 | 0.964846 |
| Prpsap2       | chr11:61729649-61762088   | 8.0663   | 7.9354   | -0.0236 | 0.934255 |
| Zfp3          | chr11:70764208-70772928   | 4.3565   | 4.6472   | 0.0932  | 0.879660 |
| Dph1          | chr11:75177642-75191241   | 13.5658  | 13.9401  | 0.0393  | 0.875599 |
| Slc43a2       | chr11:75531693-75577575   | 9.1049   | 9.0525   | -0.0083 | 0.973957 |
| Dhrs13os      | chr11:78030011-78032665   | 2.1475   | 2.2580   | 0.0724  | 0.791504 |
| Tlcd1         | chr11:78176710-78181909   | 3.9177   | 4.0386   | 0.0439  | 0.793237 |
| Med13         | chr11:86267032-86357602   | 27.5565  | 27.5368  | -0.0010 | 0.993986 |
| Nkiras2       | chr11:100619243-100627607 | 7.9534   | 8.2166   | 0.0470  | 0.819758 |
| Tex2          | chr11:106502146-106613423 | 16.6504  | 17.0641  | 0.0354  | 0.824073 |
| Gm25994       | chr11:106783170-106783271 | 913.9576 | 939.8370 | 0.0403  | 0.833944 |
| Prkca         | chr11:107933386-108343928 | 26.3079  | 26.2326  | -0.0041 | 0.982777 |
| Slc16a6       | chr11:109450854-109473598 | 7.8202   | 8.0527   | 0.0423  | 0.837317 |
| Smim5         | chr11:115899965-115906269 | 1.2484   | 1.1882   | -0.0713 | 0.924331 |
| Cant1         | chr11:118406288-118419086 | 14.8117  | 14.7523  | -0.0058 | 0.973303 |
| Slc38a10      | chr11:120103959-120151346 | 25.0614  | 25.0347  | -0.0015 | 0.992679 |
| Rnaseh1       | chr12:28649601-28659591   | 17.0835  | 17.7867  | 0.0582  | 0.886194 |
| Immp2l        | chr12:41024089-41955588   | 1.5181   | 1.4067   | -0.1099 | 0.911665 |
| Lrrn3         | chr12:41451672-41485751   | 2.6886   | 2.6439   | -0.0242 | 0.922736 |
| Zfp410        | chr12:84316858-84343830   | 16.4842  | 16.9229  | 0.0379  | 0.793471 |
| Gstz1         | chr12:87147706-87164721   | 8.9521   | 9.2926   | 0.0539  | 0.874126 |
| Ighj1         | chr12:113429780-113429833 | 81.2193  | 85.2598  | 0.0700  | 0.735501 |
| Dnah11        | chr12:117877981-118199043 | 1.3897   | 1.3711   | -0.0195 | 0.941740 |
| Dip2c         | chr13:9276527-9668928     | 1.1088   | 1.0815   | -0.0361 | 0.887213 |
| Dusp22        | chr13:30659998-30711231   | 2.3040   | 2.1447   | -0.1034 | 0.894341 |
| Smim13        | chr13:41249859-41276574   | 4.4995   | 4.6580   | 0.0499  | 0.826943 |
| Tpmt          | chr13:47025169-47044737   | 1.4799   | 1.6082   | 0.1199  | 0.861690 |
| Ddx41         | chr13:55530409-55536658   | 37.8205  | 37.6638  | -0.0060 | 0.970340 |
| Zfp87         | chr13:67515780-67526177   | 15.1751  | 15.0847  | -0.0086 | 0.968920 |
| Lysmd3        | chr13:81657805-81671888   | 16.3014  | 16.2164  | -0.0075 | 0.946493 |
| Aggf1         | chr13:95350682-95375352   | 25.5566  | 25.5211  | -0.0020 | 0.981757 |
| Polk          | chr13:96480688-96542485   | 9.9457   | 10.1958  | 0.0358  | 0.803065 |
| Fam169a       | chr13:97067286-97129521   | 0.8794   | 0.9341   | 0.0870  | 0.777375 |
| Parp8         | chr13:116854823-117025516 | 19.5723  | 20.0606  | 0.0356  | 0.769479 |
| Tmem60        | chr5:20882190-20886870    | 11.1386  | 10.8721  | -0.0349 | 0.943801 |
| Ctbp1         | chr5:33247723-33275004    | 73.1415  | 74.9496  | 0.0352  | 0.854381 |
| 4931431C16Rik | chr5:35581226-35588763    | 2.8433   | 2.7725   | -0.0364 | 0.911389 |
| Pacrgl        | chr5:48372391-48388756    | 4.5305   | 4.7613   | 0.0717  | 0.785705 |
| Klf3          | chr5:64803522-64830129    | 48.9983  | 48.9514  | -0.0014 | 0.990651 |
| Cnga1         | chr5:72603695-72642752    | 0.3513   | 0.3230   | -0.1213 | 0.900288 |
| Rassf6        | chr5:90603075-90640487    | 1.2565   | 1.1846   | -0.0851 | 0.913969 |
| Pgam5         | chr5:110259129-110269913  | 23.3857  | 23.3392  | -0.0029 | 0.969598 |
| Sart3         | chr5:113742445-113771649  | 20.3108  | 20.7876  | 0.0335  | 0.800229 |
| Ptpn11        | chr5:121130532-121191397  | 27.8004  | 27.7169  | -0.0043 | 0.982216 |
| Zcchc8        | chr5:123698301-123721044  | 16.8822  | 16.8550  | -0.0023 | 0.972261 |
| Gm15621       | chr5:124472426-124472790  | 3.3060   | 2.9990   | -0.1406 | 0.910245 |
| Gpr133        | chr5:129096749-129204599  | 0.3611   | 0.3474   | -0.0555 | 0.888288 |
| Clip2         | chr5:134489385-134552434  | 5.4743   | 5.4031   | -0.0189 | 0.947431 |
| Ap4m1         | chr5:138172001-138178708  | 6.2279   | 6.4178   | 0.0433  | 0.816911 |
| Get4          | chr5:139252323-139270051  | 9.7507   | 10.0849  | 0.0486  | 0.858832 |
| Arpc1a        | chr5:145083829-145108761  | 19.3979  | 19.2645  | -0.0100 | 0.959722 |
| Lnx2          | chr5:147016654-147076586  | 20.8706  | 21.4544  | 0.0398  | 0.873902 |



|               |                          |         |         |         |          |
|---------------|--------------------------|---------|---------|---------|----------|
| Rpa3          | chr6:8255935-8259173     | 12.0096 | 11.8298 | -0.0218 | 0.939276 |
| Zfp800        | chr6:28239930-28398005   | 16.2551 | 16.6656 | 0.0360  | 0.829914 |
| Agk           | chr6:40325477-40396762   | 4.8022  | 5.0059  | 0.0599  | 0.821199 |
| Chmp3         | chr6:71543796-71582609   | 30.3916 | 31.1453 | 0.0353  | 0.857740 |
| Sema4f        | chr6:82911884-82939769   | 1.8841  | 1.8164  | -0.0528 | 0.940752 |
| Gm24816       | chr6:90681369-90681518   | 5.9266  | 6.6099  | 0.1574  | 0.903543 |
| Tsen2         | chr6:115544663-115578350 | 2.3412  | 2.4293  | 0.0533  | 0.812958 |
| Ergic2        | chr6:148179078-148212374 | 15.7325 | 16.1273 | 0.0358  | 0.806681 |
| Ipo8          | chr7:148770682-148831467 | 13.8759 | 14.1872 | 0.0320  | 0.685272 |
| Pirb          | chr7:3711408-3720391     | 0.2083  | 0.1889  | -0.1412 | 0.821499 |
| Mzf1          | chr7:13042302-13054764   | 0.3356  | 0.3213  | -0.0628 | 0.894823 |
| Rps19         | chr7:24884370-24889806   | 43.3168 | 43.2090 | -0.0036 | 0.987987 |
| 9130221H12Rik | chr7:25228686-25230257   | 32.7368 | 32.5474 | -0.0084 | 0.950552 |
| Erf           | chr7:25242560-25250761   | 6.4878  | 6.7084  | 0.0482  | 0.872038 |
| Tbcb          | chr7:30224130-30232272   | 22.3079 | 23.0472 | 0.0470  | 0.873359 |
| Gm26247       | chr7:44248089-44248180   | 31.1906 | 29.7821 | -0.0667 | 0.860311 |
| Nup62         | chr7:44816087-44830809   | 22.1322 | 21.9629 | -0.0111 | 0.952571 |
| Tead2         | chr7:45215752-45233635   | 0.7730  | 0.7461  | -0.0511 | 0.930629 |
| Rasip1        | chr7:45627487-45639093   | 0.6708  | 0.7310  | 0.1240  | 0.864108 |
| Tmem86a       | chr7:47050639-47054776   | 0.8317  | 0.7753  | -0.1013 | 0.911044 |
| Fancf         | chr7:51860576-51862267   | 6.7986  | 7.1199  | 0.0666  | 0.895370 |
| Ndn12         | chr7:64867051-64872997   | 4.7807  | 4.7378  | -0.0130 | 0.946669 |
| Snrpa1        | chr7:66060298-66074582   | 24.4559 | 24.3631 | -0.0055 | 0.977500 |
| Lrrk1         | chr7:66226911-66388350   | 0.2398  | 0.2594  | 0.1130  | 0.888258 |
| Mrps11        | chr7:78783118-78792989   | 6.8543  | 7.1603  | 0.0630  | 0.858484 |
| Arrb1         | chr7:99535465-99606771   | 11.5841 | 11.5730 | -0.0014 | 0.991332 |
| Pold3         | chr7:100082110-100121565 | 20.6375 | 20.5619 | -0.0053 | 0.975580 |
| Trim3         | chr7:105604462-105633571 | 1.2947  | 1.3545  | 0.0652  | 0.807663 |
| Uqcr2         | chr7:120635175-120659478 | 70.6727 | 72.5042 | 0.0369  | 0.870258 |
| BC030336      | chr7:120677619-120734854 | 6.2071  | 6.1437  | -0.0148 | 0.945699 |
| Sez6l2        | chr7:126950562-126970606 | 0.7125  | 0.6841  | -0.0587 | 0.860920 |
| 9130019O22Rik | chr7:127382259-127387166 | 3.2962  | 3.4178  | 0.0523  | 0.761144 |
| Pstk          | chr7:131371140-131387839 | 10.9883 | 10.8833 | -0.0139 | 0.950934 |
| Acadsb        | chr7:131410600-131446211 | 8.4644  | 8.6965  | 0.0390  | 0.816629 |
| Mtg1          | chr7:140137563-140150786 | 2.7620  | 2.7189  | -0.0227 | 0.943218 |
| Gm21769       | chr8:20122364-20126624   | 0.9530  | 0.9068  | -0.0717 | 0.918207 |
| Gm21811       | chr8:20136454-20150494   | 1.2188  | 1.3008  | 0.0940  | 0.904454 |
| Rbpms         | chr8:33782642-33929863   | 0.5409  | 0.5886  | 0.1219  | 0.861549 |
| Atp6v1b2      | chr8:69088645-69113711   | 13.0610 | 12.9384 | -0.0136 | 0.955231 |
| Zfp963        | chr8:69741638-69749970   | 5.3513  | 5.5373  | 0.0493  | 0.793181 |
| Cers1         | chr8:70315786-70331587   | 0.7240  | 0.7783  | 0.1043  | 0.876500 |
| 1700030K09Rik | chr8:72443879-72461001   | 3.4984  | 3.4147  | -0.0349 | 0.934265 |
| Gpr97         | chr8:95017691-95045247   | 0.6922  | 0.7439  | 0.1040  | 0.898238 |
| Pkd1l3        | chr8:109614516-109672592 | 3.0914  | 3.0547  | -0.0172 | 0.954211 |
| Gm17344       | chr8:109859983-109868455 | 17.6432 | 17.4828 | -0.0132 | 0.959409 |
| Gm15655       | chr8:115705077-115707233 | 71.8058 | 74.7658 | 0.0583  | 0.900851 |
| Emc8          | chr8:120653913-120668573 | 5.2975  | 5.2555  | -0.0115 | 0.959726 |
| Banp          | chr8:121949749-122029258 | 7.0295  | 6.9621  | -0.0139 | 0.954291 |
| Zfp599        | chr9:22247429-22259895   | 5.3094  | 5.5216  | 0.0565  | 0.866741 |
| Cdon          | chr9:35421127-35507651   | 12.7771 | 13.0654 | 0.0322  | 0.816601 |
| Gm26787       | chr9:36767886-36782670   | 5.0932  | 4.9161  | -0.0511 | 0.882213 |
| Sorl1         | chr9:41964719-42124297   | 16.3370 | 16.8161 | 0.0417  | 0.874263 |
| Bco2          | chr9:50533086-50555181   | 2.6446  | 2.5494  | -0.0529 | 0.921565 |
| Ppcdc         | chr9:57412667-57440114   | 25.1678 | 25.8284 | 0.0374  | 0.878167 |
| Csnk1g1       | chr9:65908973-66045009   | 6.5209  | 6.6840  | 0.0357  | 0.800908 |
| Gcom1         | chr9:71479324-71592265   | 20.0135 | 20.6147 | 0.0427  | 0.844726 |
| Gm20537       | chr9:88407431-88456616   | 57.9829 | 57.7097 | -0.0068 | 0.968651 |
| Xrn1          | chr9:95954759-96053027   | 18.3943 | 18.8075 | 0.0320  | 0.845289 |
| Dbr1          | chr9:99575798-99584463   | 16.0004 | 15.8827 | -0.0107 | 0.952748 |
| Atp2c1        | chr9:105403538-105521257 | 16.3118 | 16.2772 | -0.0031 | 0.978180 |
| Gm9917        | chr9:107558809-107568415 | 10.4016 | 10.6627 | 0.0358  | 0.770638 |
| Amigo3        | chr9:108053158-108055701 | 5.2569  | 5.5231  | 0.0713  | 0.872056 |
| Ipbk2         | chr9:108795993-108806333 | 17.4685 | 18.0740 | 0.0492  | 0.842511 |
| Ccdc51        | chr9:109082495-109093363 | 4.3117  | 4.5053  | 0.0634  | 0.868402 |
| Zfp445        | chr9:122851913-122862128 | 45.4462 | 46.5231 | 0.0338  | 0.847320 |
| Syp           | chrX:7638470-7653256     | 2.0745  | 2.0367  | -0.0266 | 0.823290 |
| Med14         | chrX:12675368-12762073   | 15.1211 | 15.1128 | -0.0008 | 0.993836 |
| Gpr34         | chrX:13632088-13640858   | 13.0704 | 13.4937 | 0.0460  | 0.814032 |
| C330007P06Rik | chrX:36823736-36874111   | 5.6174  | 5.7744  | 0.0398  | 0.764451 |
| Gm14869       | chrX:109120800-109121684 | 1.1518  | 1.0630  | -0.1157 | 0.875536 |
| Wbp5          | chrX:136245078-136247139 | 22.5981 | 23.2974 | 0.0440  | 0.821110 |

|               |                           |          |          |         |          |
|---------------|---------------------------|----------|----------|---------|----------|
| A230072E10Rik | chrX:151291973-151344846  | 1.4122   | 1.4922   | 0.0795  | 0.884734 |
| Fam134b       | chr15:25843263-25973687   | 48.4572  | 48.4455  | -0.0003 | 0.997502 |
| St3gal1       | chr15:67102874-67113992   | 9.0557   | 9.3155   | 0.0408  | 0.815788 |
| Zfat          | chr15:68083765-68258856   | 1.8913   | 1.8633   | -0.0215 | 0.953697 |
| Kctd17        | chr15:78428563-78438909   | 5.5192   | 5.7735   | 0.0650  | 0.893233 |
| Csnk1e        | chr15:79417855-79443919   | 4.1818   | 4.3167   | 0.0458  | 0.806525 |
| Gm16059       | chr15:79427219-79431629   | 0.7072   | 0.7543   | 0.0930  | 0.676963 |
| Gm22077       | chr15:80080250-80080343   | 43.2938  | 45.7174  | 0.0786  | 0.842993 |
| Mir5113       | chr15:80940038-80940120   | 16.7246  | 18.3696  | 0.1354  | 0.871316 |
| Mcat          | chr15:83546796-83555711   | 10.0016  | 9.8722   | -0.0188 | 0.943415 |
| Tbc1d22a      | chr15:86214458-86498503   | 17.8126  | 17.7316  | -0.0066 | 0.968788 |
| Ccnt1         | chr15:98538688-98570923   | 18.2459  | 18.1498  | -0.0076 | 0.969300 |
| Rpgrip1       | chr14:52110703-52163546   | 5.8235   | 5.9707   | 0.0360  | 0.827846 |
| Gm26590       | chr14:52197501-52213852   | 18.2442  | 18.0379  | -0.0164 | 0.954022 |
| Traj27        | chr14:54192302-54192361   | 63.9039  | 61.4098  | -0.0574 | 0.932546 |
| Kcnrg         | chr14:61607481-61611916   | 2.0681   | 2.2696   | 0.1341  | 0.885514 |
| Rap2a         | chr14:120478460-120507194 | 2.9534   | 2.9126   | -0.0201 | 0.842053 |
| Gm26130       | chr17:12919584-12919722   | 28.0856  | 29.8522  | 0.0880  | 0.908477 |
| Acat2         | chr17:12942889-12960747   | 5.3225   | 5.5679   | 0.0650  | 0.866765 |
| Nme3          | chr17:24896499-24897522   | 17.9133  | 18.7277  | 0.0641  | 0.834263 |
| Bnip1         | chr17:26781078-26792565   | 4.3262   | 4.2824   | -0.0147 | 0.938032 |
| Kifc5b        | chr17:26917090-26932579   | 1.8863   | 1.9873   | 0.0753  | 0.883185 |
| Ppil1         | chr17:29250802-29264158   | 21.2075  | 21.8067  | 0.0402  | 0.849951 |
| Akap8         | chr17:32303675-32321153   | 79.5747  | 79.5760  | 0.0000  | 0.999859 |
| Rxb1          | chr17:34031811-34038393   | 15.7912  | 16.2045  | 0.0373  | 0.805240 |
| Abcf1         | chr17:35956818-35969761   | 36.1819  | 36.1973  | 0.0006  | 0.994345 |
| Gm26904       | chr17:46471500-46825221   | 6.5925   | 6.4853   | -0.0236 | 0.947183 |
| Smchd1        | chr17:71344488-71475343   | 32.4886  | 32.5302  | 0.0018  | 0.986136 |
| 1110020A21Rik | chr17:84954966-84957710   | 1.8393   | 1.6967   | -0.1164 | 0.897124 |
| Snn           | chr16:11066297-11074983   | 5.0859   | 5.3185   | 0.0645  | 0.889767 |
| 2610020C07Rik | chr16:11203382-11225796   | 6.7643   | 7.0118   | 0.0519  | 0.847209 |
| Ppil2         | chr16:17086554-17111257   | 28.0859  | 28.1251  | 0.0020  | 0.961336 |
| Il1rap        | chr16:26581703-26730117   | 2.5014   | 2.5805   | 0.0449  | 0.779303 |
| Acap2         | chr16:31092412-31201238   | 25.7144  | 25.7102  | -0.0002 | 0.998416 |
| Senp5         | chr16:31962505-32003287   | 8.7642   | 8.7292   | -0.0058 | 0.950684 |
| Fytd1         | chr16:32877499-32908963   | 12.9826  | 13.3226  | 0.0373  | 0.867903 |
| Gm26732       | chr16:44329996-44333050   | 4.6346   | 4.5618   | -0.0228 | 0.943670 |
| Usp25         | chr16:77014068-77116779   | 65.1763  | 66.4840  | 0.0287  | 0.703394 |
| App           | chr16:84954439-85173707   | 0.5297   | 0.4827   | -0.1342 | 0.914555 |
| Mis18a        | chr16:90719311-90727404   | 10.9632  | 11.3050  | 0.0443  | 0.870503 |
| Vps51         | chr19:6067841-6080324     | 12.1698  | 12.1519  | -0.0021 | 0.981195 |
| Trmt112       | chr19:6909697-6911049     | 7.4095   | 7.2243   | -0.0365 | 0.897559 |
| Zfp91         | chr19:12763659-12796126   | 19.6764  | 20.0908  | 0.0301  | 0.766135 |
| Ranbp6        | chr19:29808107-29812974   | 19.0615  | 18.9538  | -0.0082 | 0.972987 |
| Hspa12a       | chr19:58795750-58860984   | 0.2784   | 0.2602   | -0.0975 | 0.879541 |
| Pdzd8         | chr19:59296083-59345780   | 21.6445  | 21.6359  | -0.0006 | 0.995625 |
| Grk5          | chr19:60889748-61092553   | 2.3311   | 2.2711   | -0.0376 | 0.886236 |
| Csf2ra        | chr19:61224401-61228418   | 3.2414   | 3.1444   | -0.0438 | 0.920587 |
| Sgk3          | chr19:9798129-9902556     | 3.9542   | 3.8990   | -0.0203 | 0.954550 |
| Gm23722       | chr1:39573745-39573875    | 13.1265  | 14.0839  | 0.1016  | 0.807587 |
| A1597479      | chr1:43098709-43115947    | 13.7786  | 14.3025  | 0.0538  | 0.897840 |
| ldh1          | chr1:65158615-65186479    | 5.2673   | 5.1912   | -0.0210 | 0.912527 |
| R3hdm1        | chr1:128103305-128237735  | 10.1747  | 10.5104  | 0.0468  | 0.875476 |
| Uchl5         | chr1:143777277-143807466  | 16.0667  | 16.6325  | 0.0499  | 0.893687 |
| Glul          | chr1:153899943-153909723  | 26.1985  | 26.8149  | 0.0336  | 0.776929 |
| Prdx6         | chr1:161240111-161251219  | 26.8767  | 26.8221  | -0.0029 | 0.984180 |
| Sele          | chr1:164048233-164057677  | 1.7536   | 1.6868   | -0.0561 | 0.921590 |
| Gm26620       | chr1:170885064-170885881  | 2.4906   | 2.7504   | 0.1432  | 0.885894 |
| Dcaf8         | chr1:172148014-172196393  | 48.6638  | 48.7196  | 0.0017  | 0.965781 |
| Adss          | chr1:177762961-177796511  | 49.1891  | 50.3223  | 0.0329  | 0.857472 |
| Gm1305        | chr1:179695296-179745185  | 1.2368   | 1.1833   | -0.0638 | 0.906256 |
| Gm26004       | chr1:181840452-181840568  | 8.1529   | 7.2146   | -0.1764 | 0.893401 |
| Gm23153       | chr1:190482871-190483157  | 2.4882   | 2.7303   | 0.1340  | 0.605640 |
| Gm15956       | chr18:12193767-12198675   | 4.8351   | 4.5743   | -0.0800 | 0.914938 |
| Gm7701        | chr18:24257377-24258856   | 1.9207   | 2.0493   | 0.0935  | 0.780246 |
| Afg3l2        | chr18:67404766-67449166   | 18.4966  | 18.9659  | 0.0361  | 0.689285 |
| Smad2         | chr18:76241579-76305731   | 24.3220  | 24.2953  | -0.0016 | 0.979819 |
| Atp5a1        | chr18:7773728-77782869    | 271.6705 | 271.7972 | 0.0007  | 0.996077 |
| Eif3s6-ps2    | chr18:90311824-90312043   | 19.0074  | 18.1832  | -0.0640 | 0.912733 |
| Mllt10        | chr2:18055236-18212388    | 20.1371  | 20.0559  | -0.0058 | 0.964243 |
| Otud1         | chr2:19658061-19660590    | 5.0031   | 5.1917   | 0.0534  | 0.809684 |

|               |                           |         |         |         |          |
|---------------|---------------------------|---------|---------|---------|----------|
| Man1b1        | chr2:25332337-25352212    | 16.8336 | 17.2179 | 0.0326  | 0.782203 |
| Mrps2         | chr2:28468065-28471178    | 10.5679 | 10.8977 | 0.0443  | 0.865720 |
| Ggta1         | chr2:35400178-35463231    | 16.3385 | 16.8287 | 0.0426  | 0.876035 |
| Gm13625       | chr2:69871411-69872202    | 25.5511 | 26.8188 | 0.0699  | 0.884051 |
| Scrn3         | chr2:73312600-73337818    | 2.3450  | 2.2973  | -0.0296 | 0.933144 |
| Pde11a        | chr2:75989140-76338774    | 1.1671  | 1.2346  | 0.0811  | 0.888681 |
| Mybpc3        | chr2:91118143-91136516    | 0.6008  | 0.5711  | -0.0732 | 0.861278 |
| Gm27027       | chr2:93956816-93996354    | 9.2136  | 9.6956  | 0.0736  | 0.744940 |
| Prrg4         | chr2:104830740-104849876  | 1.7112  | 1.6577  | -0.0458 | 0.942079 |
| Bahd1         | chr2:118900376-118924528  | 9.9319  | 10.1945 | 0.0377  | 0.805479 |
| Tmem62        | chr2:120977016-121007852  | 11.8982 | 12.2257 | 0.0392  | 0.838687 |
| Tmem87b       | chr2:128818117-128854261  | 8.0895  | 8.0570  | -0.0058 | 0.977856 |
| ldh3b         | chr2:130279308-130284547  | 50.8127 | 50.8327 | 0.0006  | 0.994589 |
| Mir103-2      | chr2:131288051-131288137  | 10.7486 | 7.9167  | -0.4412 | 0.817041 |
| Esf1          | chr2:140119882-140170564  | 11.8462 | 11.7073 | -0.0170 | 0.958355 |
| Zfp345        | chr2:150470990-150485091  | 0.3085  | 0.3449  | 0.1611  | 0.889863 |
| Slc52a3       | chr2:151996510-152009258  | 4.2242  | 4.3993  | 0.0586  | 0.876363 |
| Ahcy          | chr2:155059309-155074497  | 2.8897  | 3.0326  | 0.0696  | 0.859767 |
| 5430405H02Rik | chr2:156852429-156862945  | 5.9824  | 6.2135  | 0.0547  | 0.849825 |
| Tox2          | chr2:163203124-163324170  | 0.6817  | 0.7277  | 0.0941  | 0.818752 |
| Vamp7-ps      | chr2:174046618-174047273  | 10.1220 | 10.5894 | 0.0651  | 0.839765 |
| Nelfcd        | chr2:174415803-174427502  | 18.7987 | 18.6881 | -0.0085 | 0.964402 |
| mt-Nd6        | chrM:13551-14070          | 51.8162 | 55.5796 | 0.1012  | 0.878630 |
| Car2          | chr3:14886425-14900769    | 2.4969  | 2.4171  | -0.0468 | 0.922076 |
| Hps3          | chr3:19995944-20035315    | 10.1551 | 10.1312 | -0.0034 | 0.981384 |
| Tdrkh         | chr3:94413295-94432633    | 0.7387  | 0.7941  | 0.1043  | 0.850605 |
| Lysmd1        | chr3:95134087-95139518    | 3.1830  | 3.3219  | 0.0616  | 0.749123 |
| Wars2         | chr3:99141067-99239186    | 2.7928  | 2.9134  | 0.0610  | 0.875864 |
| A930002I21Rik | chr3:107090879-107098401  | 3.2874  | 3.5231  | 0.0999  | 0.896984 |
| Ppa2          | chr3:133310109-133378235  | 9.1656  | 9.4285  | 0.0408  | 0.869131 |
| Col24a1       | chr3:145292471-145552011  | 0.1729  | 0.1586  | -0.1243 | 0.883311 |
| Gm23090       | chr4:41213775-41213853    | 10.1160 | 9.3014  | -0.1211 | 0.845375 |
| Dnajb5        | chr4:42949813-42959425    | 1.8486  | 1.8096  | -0.0307 | 0.933206 |
| Stoml2        | chr4:43027689-43031710    | 15.0453 | 14.9307 | -0.0110 | 0.948850 |
| Gm26566       | chr4:88721804-88722842    | 19.3863 | 20.0945 | 0.0518  | 0.846203 |
| ltgb3bp       | chr4:99765401-99929813    | 5.1285  | 5.2785  | 0.0416  | 0.856624 |
| Dnajc6        | chr4:101496647-101642799  | 2.3245  | 2.4087  | 0.0513  | 0.868490 |
| Bend5         | chr4:111415005-111460298  | 1.1136  | 1.1882  | 0.0935  | 0.808488 |
| Gm12841       | chr4:117883620-117885995  | 24.8333 | 25.8283 | 0.0567  | 0.874924 |
| Lepre1        | chr4:119232914-119248975  | 1.9487  | 2.0565  | 0.0777  | 0.909220 |
| Rims3         | chr4:120854815-120896579  | 0.5177  | 0.4906  | -0.0773 | 0.922355 |
| Trit1         | chr4:123016596-123054949  | 12.4058 | 12.3231 | -0.0097 | 0.942976 |
| Zcchc17       | chr4:130315382-130359943  | 9.4584  | 9.7385  | 0.0421  | 0.866983 |
| Fuca1         | chr4:135920734-135940311  | 13.4200 | 13.3052 | -0.0124 | 0.958771 |
| NA            | chr4:136343974-136345981  | 5.6751  | 5.5799  | -0.0244 | 0.915940 |
| Tmem106a      | chr11:101582241-101591788 | 1.8508  | 1.9938  | 0.1073  | 0.901594 |
| 9330162012Rik | chr13:24937400-24941417   | 0.1337  | 0.1591  | 0.2512  | 0.867497 |
| ltga1         | chr13:114958078-115101964 | 0.2599  | 0.2940  | 0.1781  | 0.859213 |
| Gm22270       | chr5:107905176-107905308  | 40.7934 | 38.7916 | -0.0726 | 0.918174 |
| Gm26711       | chr5:110385834-110388073  | 1.1016  | 1.2134  | 0.1394  | 0.887621 |
| Gm15470       | chr7:41490350-41491721    | 1.5915  | 1.7239  | 0.1152  | 0.855048 |
| Gm17322       | chr9:57998040-58007451    | 0.2659  | 0.3176  | 0.2564  | 0.853176 |
| Gm14373       | chrX:5699726-5701884      | 0.3174  | 0.3591  | 0.1778  | 0.874597 |
| Gm9083        | chrX:20239468-20240287    | 0.9990  | 0.9244  | -0.1120 | 0.888382 |
| Gm26513       | chr15:98093282-98095771   | 1.1382  | 1.2454  | 0.1299  | 0.852775 |
| Vegfa         | chr17:46016992-46032377   | 0.1675  | 0.1506  | -0.1536 | 0.894290 |
| Gm15591       | chr16:45736502-45737318   | 2.9161  | 3.2344  | 0.1495  | 0.870501 |
| Kcnj13        | chr1:87386362-87394729    | 1.8659  | 2.0701  | 0.1499  | 0.894012 |
| Hc            | chr2:34983330-35061438    | 0.1194  | 0.1370  | 0.1988  | 0.873784 |
| Lrrtm2        | chr18:35209010-35215024   | 0.3171  | 0.3532  | 0.1556  | 0.894991 |
| NA            | chr3:94392970-94402848    | 3.5827  | 3.3263  | -0.1071 | 0.903839 |
| Gm5070        | chr3:95410345-95411176    | 0.7019  | 0.8051  | 0.1979  | 0.889132 |
| Gm22154       | chr4:123293151-123293282  | 11.6520 | 10.7494 | -0.1163 | 0.917121 |
| Spata21       | chr4:141088332-141112760  | 0.3578  | 0.3310  | -0.1123 | 0.886287 |
| Fhad1         | chr4:141890437-142015082  | 0.1124  | 0.1286  | 0.1936  | 0.838306 |
| Ube4bos3      | chr4:149334638-149335897  | 3.1704  | 2.9787  | -0.0900 | 0.915598 |
| Gm16135       | chr10:62998778-62999689   | 1.9459  | 1.7444  | -0.1577 | 0.904612 |
| Gm12568       | chr11:46243570-46244194   | 1.4185  | 1.2926  | -0.1341 | 0.908023 |
| 4933406C10Rik | chr12:32919383-32953789   | 0.3188  | 0.3593  | 0.1726  | 0.845857 |
| Plat          | chr8:22757743-22782847    | 0.3006  | 0.3378  | 0.1681  | 0.885555 |
| Rbpms2        | chr9:65629647-65660528    | 0.3739  | 0.4425  | 0.2433  | 0.865853 |

|               |                           |          |          |         |          |
|---------------|---------------------------|----------|----------|---------|----------|
| Ccdc122       | chr14:77036771-77112257   | 0.7885   | 0.8702   | 0.1423  | 0.894728 |
| Gm17082       | chr14:122121552-122122643 | 0.9079   | 1.0222   | 0.1711  | 0.888520 |
| Ccdc64b       | chr17:23660522-23668610   | 0.4212   | 0.4889   | 0.2149  | 0.900364 |
| Muc20         | chr16:32777418-32797435   | 0.2422   | 0.2173   | -0.1567 | 0.906346 |
| Gm8250        | chr19:18581454-18582228   | 1.2588   | 1.4187   | 0.1726  | 0.861391 |
| Gm13594       | chr2:65238755-65239675    | 1.4344   | 1.6316   | 0.1858  | 0.847456 |
| Ptgr1         | chr4:58965438-58987119    | 0.3747   | 0.4257   | 0.1841  | 0.893555 |
| Gm12989       | chr4:135715867-135716598  | 0.9379   | 0.8392   | -0.1605 | 0.896720 |
| Pafah1b1      | chr11:74673948-74724670   | 39.7473  | 39.8015  | 0.0020  | 0.985411 |
| Gm26541       | chr10:80681837-80687176   | 49.3163  | 50.3898  | 0.0311  | 0.842594 |
| 9130230N09Rik | chr11:22858930-22861264   | 4.0416   | 4.2669   | 0.0782  | 0.710285 |
| Limd2         | chr11:106156255-106160860 | 165.6852 | 165.9856 | 0.0026  | 0.982412 |
| Narf          | chr11:121237252-121255856 | 16.2586  | 16.6228  | 0.0320  | 0.830905 |
| Vipr2         | chr12:116077725-116146261 | 0.1507   | 0.1726   | 0.1952  | 0.887607 |
| Faf2          | chr13:54621783-54664068   | 18.7783  | 18.7439  | -0.0026 | 0.985994 |
| Ptch1         | chr13:63511532-63565520   | 8.5071   | 8.4585   | -0.0083 | 0.970490 |
| Ppm1g         | chr5:31202667-31220545    | 52.5021  | 52.5638  | 0.0017  | 0.977534 |
| 2210016L21Rik | chr5:114942157-114949783  | 9.3410   | 9.2517   | -0.0138 | 0.953114 |
| Trbj2-1       | chr6:41542753-41542803    | 99.9126  | 104.3779 | 0.0631  | 0.751454 |
| Zfp865        | chr7:5020375-5033138      | 7.2772   | 7.2215   | -0.0111 | 0.956242 |
| Gltscr1       | chr7:15971261-15999495    | 2.2677   | 2.3591   | 0.0570  | 0.880656 |
| Sars2         | chr7:28741967-28753879    | 6.9050   | 6.8137   | -0.0192 | 0.950515 |
| Fam169b       | chr7:68273838-68363089    | 48.0509  | 49.1354  | 0.0322  | 0.831549 |
| Inpp1         | chr7:101822632-101838226  | 6.7744   | 6.9945   | 0.0461  | 0.894620 |
| Gm8730        | chr8:102864778-102865853  | 0.9067   | 0.8382   | -0.1133 | 0.867977 |
| Sf3b3         | chr8:110810491-110846803  | 84.4181  | 86.0359  | 0.0274  | 0.704999 |
| Sdr4ze1       | chr8:117661398-117673689  | 2.1012   | 2.0432   | -0.0403 | 0.953831 |
| Gas8          | chr8:123518834-123536649  | 5.8957   | 5.8055   | -0.0223 | 0.939112 |
| Maml2         | chr9:13619989-13709533    | 5.7619   | 5.9203   | 0.0391  | 0.815806 |
| 1700110K17Rik | chr9:40323425-40343564    | 10.4981  | 10.3342  | -0.0227 | 0.943501 |
| Pafah1b2      | chr9:45965310-45984871    | 33.6425  | 33.5892  | -0.0023 | 0.988020 |
| Gm17200       | chr9:123678095-123701046  | 5.9527   | 6.1686   | 0.0514  | 0.869063 |
| Cd99l2        | chrX:71420059-71492849    | 7.7142   | 7.6607   | -0.0101 | 0.962638 |
| F8a           | chrX:73228305-73230795    | 5.7785   | 5.7039   | -0.0187 | 0.936937 |
| Gm14834       | chrX:107174609-107175494  | 0.7435   | 0.8457   | 0.1858  | 0.901880 |
| Kctd12b       | chrX:153685153-153696391  | 0.9407   | 0.9920   | 0.0765  | 0.902961 |
| March6        | chr15:31455898-31531037   | 19.5380  | 19.9442  | 0.0297  | 0.778814 |
| Kpna3         | chr14:61365185-61439947   | 21.3635  | 21.2968  | -0.0045 | 0.983113 |
| Med4          | chr14:73510048-73518545   | 25.3392  | 26.1128  | 0.0434  | 0.896312 |
| Gm22589       | chr17:35242677-35242754   | 17.7230  | 16.6648  | -0.0888 | 0.902866 |
| Klhl22        | chr16:17759617-17793382   | 2.5101   | 2.4681   | -0.0243 | 0.940583 |
| Etv5          | chr16:22381308-22439719   | 1.2193   | 1.2759   | 0.0655  | 0.884796 |
| Gm26670       | chr1:191986831-191990138  | 0.5589   | 0.5244   | -0.0919 | 0.922644 |
| 4930570N18Rik | chr1:193203038-193226208  | 6.2088   | 6.6998   | 0.1098  | 0.879041 |
| Ralgds        | chr2:28513124-28553081    | 8.2668   | 8.5012   | 0.0403  | 0.896189 |
| Ier5l         | chr2:30472647-30474199    | 3.0597   | 3.2165   | 0.0721  | 0.891774 |
| Zeb2          | chr2:44983633-45117395    | 0.6441   | 0.6335   | -0.0240 | 0.932801 |
| Ly75          | chr2:60292102-60383303    | 21.7587  | 21.7714  | 0.0008  | 0.993958 |
| Cept1         | chr3:106502259-106547802  | 42.5511  | 42.5041  | -0.0016 | 0.991834 |
| Ggh           | chr4:20042051-20066750    | 11.5132  | 11.8955  | 0.0471  | 0.875873 |
| Pole3         | chr4:62522648-62525068    | 14.6387  | 14.5024  | -0.0135 | 0.968654 |
| Fam151a       | chr4:106733888-106748292  | 4.6463   | 4.5713   | -0.0235 | 0.931166 |
| Hectd3        | chr4:116995316-117005277  | 15.3880  | 15.7998  | 0.0381  | 0.862309 |
| Myzap         | chr9:71504346-71592360    | 0.1883   | 0.2062   | 0.1308  | 0.851206 |
| Gm10822       | chr2:73892995-73900850    | 0.3130   | 0.3652   | 0.2225  | 0.880874 |
| Hrh4          | chr18:13006989-13022882   | 0.7144   | 0.7969   | 0.1577  | 0.842308 |
| Enpp6         | chr8:46986924-47094895    | 0.3076   | 0.3398   | 0.1437  | 0.906279 |
| Gsta4         | chr9:78191965-78209348    | 8.0919   | 8.4202   | 0.0574  | 0.910979 |
| Dgkq          | chr5:108646692-108669672  | 9.8390   | 9.8240   | -0.0022 | 0.987975 |
| Pcmt1         | chr10:7629372-7681136     | 11.5257  | 11.5004  | -0.0032 | 0.982370 |
| Sgpl1         | chr10:61098641-61147703   | 22.3024  | 22.3138  | 0.0007  | 0.994849 |
| Plekhj1       | chr10:80796099-80798626   | 27.7512  | 28.5012  | 0.0385  | 0.867000 |
| Ric8b         | chr10:84917615-85016446   | 9.5360   | 9.7877   | 0.0376  | 0.791071 |
| Pmch          | chr10:88091071-88092375   | 2.6876   | 2.8806   | 0.1001  | 0.917941 |
| Amdhd1        | chr10:93523337-93540033   | 0.9160   | 0.9672   | 0.0784  | 0.888460 |
| Atxn7l3b      | chr10:112925437-112929026 | 29.1078  | 29.1082  | 0.0000  | 0.999897 |
| F420014N23Rik | chr10:127195248-127202643 | 5.6912   | 5.6528   | -0.0098 | 0.960048 |
| Pmel          | chr10:128706257-128720238 | 35.8495  | 35.7848  | -0.0026 | 0.991561 |
| Camk2b        | chr11:5969643-6066362     | 1.8483   | 1.9067   | 0.0449  | 0.890647 |
| Psme4         | chr11:30771725-30880361   | 21.2962  | 21.3532  | 0.0039  | 0.954698 |
| Txndc17       | chr11:72207546-72210015   | 41.0171  | 42.0400  | 0.0355  | 0.830921 |

|               |                           |          |          |         |          |
|---------------|---------------------------|----------|----------|---------|----------|
| 4931413K12Rik | chr11:75589664-75594771   | 3.7616   | 3.6487   | -0.0440 | 0.946135 |
| Gm21975       | chr11:79513384-79530559   | 14.7381  | 14.6939  | -0.0043 | 0.986521 |
| Evi2b         | chr11:79513384-79530589   | 14.5266  | 14.4829  | -0.0043 | 0.986521 |
| Gm11423       | chr11:82779600-82781042   | 4.8324   | 4.7353   | -0.0293 | 0.912615 |
| Hoxb4         | chr11:96316683-96321638   | 2.2904   | 2.3750   | 0.0523  | 0.891096 |
| Nol11         | chr11:107166662-107189381 | 17.6040  | 17.5629  | -0.0034 | 0.985339 |
| Psmid12       | chr11:107479483-107504362 | 25.9047  | 25.8597  | -0.0025 | 0.991826 |
| Fam228a       | chr12:4713816-4738383     | 0.4889   | 0.5275   | 0.1097  | 0.875609 |
| Pnma1         | chr12:84146130-84148489   | 0.3541   | 0.3919   | 0.1462  | 0.907448 |
| Gm6863        | chr12:96922419-96923061   | 10.6936  | 11.2257  | 0.0701  | 0.878272 |
| Tmem251       | chr12:102743759-102747561 | 8.2021   | 8.4397   | 0.0412  | 0.848098 |
| Fgd3          | chr13:49261553-49320311   | 19.7792  | 19.7905  | 0.0008  | 0.995324 |
| Etohd2        | chr13:59769964-59773680   | 13.7144  | 14.0705  | 0.0370  | 0.890181 |
| Zfp456        | chr13:67345245-67375810   | 8.8587   | 9.0857   | 0.0365  | 0.869151 |
| Gm9828        | chr13:98316421-98324415   | 8.5340   | 8.7981   | 0.0440  | 0.890904 |
| 6430562O15Rik | chr13:99396923-99412864   | 0.8938   | 0.8733   | -0.0336 | 0.931178 |
| Mrps36        | chr13:100735954-100744659 | 3.4099   | 3.5886   | 0.0737  | 0.912555 |
| Srek1ip1      | chr13:104792483-104839274 | 6.8851   | 7.1265   | 0.0497  | 0.895448 |
| Snx17         | chr5:31193226-31198900    | 31.2785  | 31.9218  | 0.0294  | 0.801662 |
| Cops4         | chr5:100518308-100547803  | 18.8988  | 18.8519  | -0.0036 | 0.986565 |
| NA            | chr5:105323790-105343929  | 1.1989   | 1.1478   | -0.0629 | 0.896531 |
| Ankrd13a      | chr5:114774676-114806200  | 57.5016  | 57.6491  | 0.0037  | 0.966875 |
| Got2-ps1      | chr5:138364172-138365580  | 1.4817   | 1.6181   | 0.1271  | 0.891812 |
| Pdia4         | chr6:47796141-47813512    | 99.9028  | 101.9074 | 0.0287  | 0.767605 |
| Hibadh        | chr6:52546227-52640389    | 17.0867  | 17.5308  | 0.0370  | 0.825558 |
| Zfp626        | chr7:27810812-27818669    | 13.1971  | 13.6259  | 0.0461  | 0.759121 |
| Gm5113        | chr7:30169874-30180209    | 0.9569   | 0.9243   | -0.0500 | 0.924526 |
| Nrip3         | chr7:109758054-109782025  | 1.0399   | 1.0163   | -0.0332 | 0.921418 |
| Ctr9          | chr7:111028950-111056377  | 19.0000  | 19.0267  | 0.0020  | 0.986630 |
| Eri2          | chr7:119768678-119794058  | 3.5289   | 3.6313   | 0.0413  | 0.827547 |
| Maz           | chr7:127022142-127026479  | 84.6188  | 86.4290  | 0.0305  | 0.837178 |
| E430018J23Rik | chr7:127389672-127393629  | 4.6081   | 4.7546   | 0.0452  | 0.884415 |
| Tgfbr3l       | chr8:4248213-4251423      | 2.7728   | 2.8989   | 0.0642  | 0.860330 |
| Ushbp1        | chr8:71384273-71395801    | 0.2155   | 0.1905   | -0.1777 | 0.920624 |
| Ddx19b        | chr8:111003187-111031751  | 12.1257  | 12.1300  | 0.0005  | 0.996425 |
| Fbxl12        | chr9:20618117-20644767    | 6.2820   | 6.2451   | -0.0085 | 0.979368 |
| 1810026J23Rik | chr9:21592721-21595970    | 11.7170  | 11.7075  | -0.0012 | 0.992069 |
| Cd3e          | chr9:44998742-45009590    | 56.6632  | 58.0660  | 0.0353  | 0.876491 |
| Spg21         | chr9:65460936-65488470    | 31.7099  | 32.5510  | 0.0378  | 0.896741 |
| Pxylp1        | chr9:96823343-96892669    | 1.5219   | 1.4905   | -0.0300 | 0.948231 |
| Csrnp1        | chr9:119971165-119977250  | 17.8280  | 17.7790  | -0.0040 | 0.978602 |
| Limd1         | chr9:123478700-123521548  | 30.9317  | 31.5422  | 0.0282  | 0.756138 |
| Was           | chrX:8081452-8090498      | 74.8702  | 76.3548  | 0.0283  | 0.802406 |
| Cask          | chrX:13517079-13851367    | 0.6037   | 0.6287   | 0.0584  | 0.830374 |
| Flna          | chrX:74223460-74249820    | 231.1976 | 231.6659 | 0.0029  | 0.985776 |
| Gm20489       | chrX:101261404-101269023  | 125.5194 | 125.6155 | 0.0011  | 0.994561 |
| Btk           | chrX:134542335-134583570  | 0.2140   | 0.1942   | -0.1400 | 0.923006 |
| Gla           | chrX:134588148-134601125  | 4.7593   | 4.9120   | 0.0456  | 0.871383 |
| Zmat1         | chrX:134971371-135009209  | 1.0228   | 1.0003   | -0.0322 | 0.951169 |
| Tmsb15l       | chrX:136954987-136976869  | 7.1965   | 7.5014   | 0.0599  | 0.877163 |
| Sh3kbp1       | chrX:159627271-159978069  | 40.4425  | 40.5512  | 0.0039  | 0.974963 |
| Piga          | chrX:164419792-164433916  | 4.0789   | 4.1944   | 0.0403  | 0.901539 |
| Mttr12        | chr15:12205027-12272240   | 23.5216  | 23.5256  | 0.0002  | 0.998533 |
| Troap         | chr15:99074972-99083407   | 1.9132   | 2.0064   | 0.0687  | 0.879148 |
| Kctd6         | chr14:8214147-8223567     | 3.0729   | 3.0296   | -0.0205 | 0.956155 |
| Mettl6        | chr14:31478319-31495030   | 18.0697  | 18.0001  | -0.0056 | 0.975012 |
| Setdb2        | chr14:59402008-59440884   | 12.5189  | 12.4601  | -0.0068 | 0.972283 |
| Pibf1         | chr14:99099432-99254493   | 8.4647   | 8.4214   | -0.0074 | 0.975580 |
| Ppp1r10       | chr17:35916433-35932281   | 19.1250  | 19.5072  | 0.0285  | 0.707586 |
| Gm6034        | chr17:36042960-36058645   | 0.4219   | 0.4666   | 0.1452  | 0.869304 |
| Polr1c        | chr17:46243919-46248054   | 21.8987  | 21.8468  | -0.0034 | 0.980460 |
| Ranbp3        | chr17:56673224-56711769   | 50.3614  | 50.4705  | 0.0031  | 0.968936 |
| 4930565N06Rik | chr16:36880518-36897189   | 1.1869   | 1.1526   | -0.0423 | 0.881589 |
| Arhgap31      | chr16:38598339-38713274   | 10.7527  | 11.0132  | 0.0345  | 0.883696 |
| Pigp          | chr16:94358762-94371015   | 7.8426   | 8.1008   | 0.0467  | 0.813393 |
| Ostf1         | chr19:18579327-18631789   | 17.4806  | 17.5059  | 0.0021  | 0.984318 |
| Gm9938        | chr19:23723278-23725034   | 13.0382  | 13.4065  | 0.0402  | 0.791876 |
| 2010002M12Rik | chr19:34617048-34640743   | 0.8751   | 0.8510   | -0.0404 | 0.899897 |
| Pms1          | chr1:53189186-53297018    | 5.9066   | 6.0546   | 0.0357  | 0.852655 |
| Gm26293       | chr1:59692508-59692592    | 9.6570   | 10.6376  | 0.1395  | 0.865485 |
| Klf7          | chr1:64029446-64122282    | 4.1667   | 4.2838   | 0.0400  | 0.810054 |

|               |                           |         |         |         |          |
|---------------|---------------------------|---------|---------|---------|----------|
| A630001G21Rik | chr1:85717082-85778643    | 20.3827 | 20.8871 | 0.0353  | 0.849810 |
| Ilkap         | chr1:91375830-91398783    | 55.3157 | 56.5915 | 0.0329  | 0.830259 |
| Gm19705       | chr1:136670768-136690804  | 5.8553  | 5.7762  | -0.0196 | 0.933904 |
| 1700056E22Rik | chr1:184033031-184033998  | 1.5729  | 1.7056  | 0.1169  | 0.889662 |
| Gm10036       | chr18:15832793-15833330   | 5.2800  | 5.0402  | -0.0671 | 0.927614 |
| Nup188        | chr2:30286396-30344266    | 13.0409 | 13.3037 | 0.0288  | 0.501128 |
| Gm14471       | chr2:30306066-30323986    | 3.4942  | 3.4433  | -0.0212 | 0.935438 |
| 6330409D20Rik | chr2:32732619-32741016    | 4.6459  | 4.8705  | 0.0681  | 0.891701 |
| Zbtb43        | chr2:33450286-33468559    | 11.3855 | 11.3740 | -0.0015 | 0.989660 |
| Gm13461       | chr2:41987472-41988829    | 8.2010  | 8.0130  | -0.0335 | 0.929633 |
| Pkp4          | chr2:59160849-59355208    | 6.3531  | 6.3209  | -0.0073 | 0.967856 |
| Nop10         | chr2:112261925-112263269  | 58.4890 | 60.2931 | 0.0438  | 0.923698 |
| Fam227b       | chr2:125983482-126152004  | 0.2506  | 0.2888  | 0.2044  | 0.873547 |
| Rbck1         | chr2:152316333-152332653  | 38.2696 | 38.2828 | 0.0005  | 0.997737 |
| Ctnnb1        | chr2:157737400-157891614  | 26.1232 | 26.0841 | -0.0022 | 0.990891 |
| Gm17096       | chr2:166943538-166944308  | 3.1534  | 3.3656  | 0.0940  | 0.921669 |
| Zfp64         | chr2:168893330-168955587  | 6.4959  | 6.6616  | 0.0363  | 0.835172 |
| Vapb          | chr2:173737510-173784336  | 8.4529  | 8.6433  | 0.0321  | 0.804167 |
| Fbxw7         | chr3:84815267-84979198    | 11.8837 | 11.8881 | 0.0005  | 0.996714 |
| Mtx1          | chr3:89209080-89227088    | 12.4624 | 12.7863 | 0.0370  | 0.857695 |
| Scnm1         | chr3:95129535-95134012    | 22.6267 | 22.5425 | -0.0054 | 0.977041 |
| Prkab         | chr3:146729578-146812960  | 55.5026 | 55.6691 | 0.0043  | 0.964844 |
| Osgin2        | chr4:15997120-16013888    | 4.4075  | 4.5448  | 0.0442  | 0.856645 |
| Orc3          | chr4:34570795-34614944    | 23.6855 | 23.6928 | 0.0004  | 0.997429 |
| Aco1          | chr4:40143080-40198338    | 11.8786 | 12.1541 | 0.0331  | 0.814744 |
| Ubap1         | chr4:41348995-41390525    | 14.3866 | 14.3552 | -0.0031 | 0.980346 |
| Sepn1         | chr4:134537891-134552166  | 0.8019  | 0.8440  | 0.0737  | 0.837344 |
| 1700012B07Rik | chr11:109787650-109828046 | 0.2992  | 0.2703  | -0.1464 | 0.878306 |
| Gm8566        | chr6:67205618-67206083    | 1.8749  | 1.7549  | -0.0954 | 0.934729 |
| Crispld2      | chr8:119992437-120052793  | 0.1485  | 0.1374  | -0.1123 | 0.910910 |
| Ptk2          | chr15:73205104-73423191   | 0.4735  | 0.5162  | 0.1245  | 0.868722 |
| Gm26753       | chr17:21485176-21488875   | 1.1221  | 1.0886  | -0.0437 | 0.944839 |
| 4833418N02Rik | chr17:87274885-87282814   | 0.9532  | 1.0410  | 0.1271  | 0.896360 |
| Srl           | chr16:4480215-4541816     | 0.2652  | 0.2855  | 0.1065  | 0.882621 |
| AA543186      | chr2:25327449-25332571    | 0.9487  | 0.8979  | -0.0795 | 0.935671 |
| Gm13548       | chr2:52739070-52739455    | 3.6096  | 3.4145  | -0.0802 | 0.905789 |
| Tdo2          | chr3:81957089-81975750    | 1.1058  | 1.1912  | 0.1074  | 0.883833 |
| Atg4a-ps      | chr3:103644002-103646069  | 0.3410  | 0.3055  | -0.1587 | 0.916794 |
| Gm10563       | chr4:155614412-155645408  | 5.2972  | 5.8134  | 0.1341  | 0.880932 |
| Gm16350       | chr8:14961065-14961586    | 1.6527  | 1.5138  | -0.1267 | 0.907985 |
| Gm22738       | chr14:57831062-57831209   | 6.1262  | 6.9472  | 0.1814  | 0.897770 |
| Gm4219        | chr19:59943721-59948398   | 0.3306  | 0.2919  | -0.1800 | 0.916357 |
| Gm25184       | chr2:181512549-181512712  | 5.5158  | 5.0601  | -0.1244 | 0.929016 |
| Jrk           | chr15:74702411-74709535   | 5.9447  | 5.9255  | -0.0047 | 0.985742 |
| Fgfr1op       | chr17:8165500-8196804     | 10.7314 | 10.7218 | -0.0013 | 0.990589 |
| Fbxw4         | chr19:45578253-45660312   | 8.5627  | 8.5322  | -0.0052 | 0.976490 |
| Gm6542        | chr18:36609957-36610729   | 4.5614  | 4.3392  | -0.0720 | 0.927366 |
| Gzmm          | chr10:79689019-79695261   | 1.6526  | 1.5950  | -0.0512 | 0.903452 |
| Lmnb2         | chr10:80901202-80918245   | 8.9486  | 8.9306  | -0.0029 | 0.986878 |
| Plxnc1        | chr10:94790865-94944578   | 10.4443 | 10.6865 | 0.0331  | 0.865206 |
| Coq10a        | chr10:128363096-128370032 | 6.4149  | 6.5992  | 0.0409  | 0.827654 |
| Gm21988       | chr11:70235205-70239830   | 22.5013 | 22.2514 | -0.0161 | 0.970921 |
| Gna13         | chr11:109362830-109401369 | 52.5453 | 52.7176 | 0.0047  | 0.960859 |
| Rnf213        | chr11:119393099-119487418 | 64.1499 | 66.2791 | 0.0471  | 0.900461 |
| Crcp          | chr5:130029289-130060789  | 21.1467 | 21.7304 | 0.0393  | 0.882159 |
| Fbxl18        | chr5:142866945-142895421  | 1.8216  | 1.8081  | -0.0107 | 0.966015 |
| Cbx3          | chr6:51470359-51483704    | 8.2497  | 8.2264  | -0.0041 | 0.983509 |
| Tprkb         | chr6:85915737-85930284    | 11.1854 | 11.1436 | -0.0054 | 0.981538 |
| Gm26770       | chr6:128356003-128358839  | 6.3888  | 6.3293  | -0.0135 | 0.962512 |
| Snrpa         | chr7:27187004-27196271    | 15.4609 | 15.3905 | -0.0066 | 0.981687 |
| Sephs2        | chr7:127272560-127273919  | 28.6456 | 28.4266 | -0.0111 | 0.972923 |
| Mre11a        | chr9:14784653-14837123    | 13.6095 | 13.6357 | 0.0028  | 0.968478 |
| Bcl2l2        | chr14:54883376-54888234   | 4.1568  | 4.1225  | -0.0120 | 0.973235 |
| Wiz           | chr17:32354054-32389401   | 2.7446  | 2.8147  | 0.0364  | 0.838355 |
| Brd2          | chr17:34112022-34122634   | 43.9693 | 44.1168 | 0.0048  | 0.952267 |
| Spdya         | chr17:71552060-71589533   | 1.1564  | 1.2279  | 0.0866  | 0.850049 |
| Gm15764       | chr16:18416681-18421997   | 4.8997  | 4.7932  | -0.0317 | 0.934003 |
| Ppp1r2        | chr16:31251536-31275277   | 4.0673  | 4.0346  | -0.0117 | 0.974218 |
| Pde6d         | chr1:86542993-86582629    | 6.1052  | 6.3536  | 0.0575  | 0.919503 |
| Cyb5r1        | chr1:134405780-134411740  | 5.5471  | 5.7151  | 0.0431  | 0.864904 |
| B930094E09Rik | chr18:31609511-31610751   | 4.7777  | 4.9866  | 0.0617  | 0.849035 |

|               |                           |          |          |         |          |
|---------------|---------------------------|----------|----------|---------|----------|
| Arl5b         | chr2:15049394-15082456    | 6.3085   | 6.4843   | 0.0396  | 0.889724 |
| Golga2        | chr2:32287383-32307921    | 19.8184  | 19.8453  | 0.0020  | 0.988494 |
| Mettl8        | chr2:70964560-71055583    | 2.7028   | 2.6662   | -0.0197 | 0.964401 |
| Lpcat4        | chr2:112239467-112247111  | 8.9018   | 9.1528   | 0.0401  | 0.871944 |
| 1700020I14Rik | chr2:119594296-119607502  | 37.8084  | 37.8804  | 0.0027  | 0.982633 |
| Zfp442        | chr2:150407140-150451486  | 3.5273   | 3.4447   | -0.0342 | 0.949215 |
| 1700064H15Rik | chr3:19610367-19628677    | 13.9069  | 13.6054  | -0.0316 | 0.924084 |
| Bank1         | chr3:136053362-136326046  | 1.4062   | 1.3825   | -0.0246 | 0.921158 |
| Coq3          | chr4:21879672-21912162    | 5.0696   | 5.0179   | -0.0148 | 0.940738 |
| 2010015M23Rik | chr11:88039577-88047360   | 0.7981   | 0.8746   | 0.1322  | 0.891118 |
| Plip          | chr8:94674894-94696242    | 0.7041   | 0.7586   | 0.1076  | 0.886709 |
| Gm26892       | chr1:132036804-132067945  | 0.6045   | 0.6637   | 0.1347  | 0.867611 |
| Gm25316       | chr2:10499965-10500083    | 4.5679   | 5.1340   | 0.1686  | 0.916007 |
| Nfrkb         | chr9:31386191-31421333    | 13.5122  | 13.5394  | 0.0029  | 0.984721 |
| Rfx2          | chr17:56775896-56831008   | 0.6473   | 0.6273   | -0.0453 | 0.898749 |
| Insig1        | chr5:28071362-28078662    | 22.9667  | 23.4720  | 0.0314  | 0.834734 |
| Srsf3         | chr17:29032672-29043366   | 57.0886  | 58.2424  | 0.0289  | 0.854175 |
| Gm17552       | chr19:4169565-4174284     | 4.6220   | 4.5835   | -0.0121 | 0.967551 |
| Atg9a         | chr1:75180865-75191923    | 7.6587   | 7.6327   | -0.0049 | 0.978581 |
| Dars          | chr1:128363707-128417416  | 65.7246  | 65.8167  | 0.0020  | 0.987664 |
| Rbfa          | chr18:80192264-80200658   | 28.1040  | 28.0058  | -0.0050 | 0.978980 |
| Rapgef4       | chr2:71981239-72257474    | 1.9338   | 1.9048   | -0.0218 | 0.969673 |
| Sf3b4         | chr3:96172331-96177564    | 3.3359   | 3.5043   | 0.0710  | 0.893971 |
| Lamtor3       | chr3:137918525-137928765  | 15.2213  | 15.0738  | -0.0140 | 0.966864 |
| 5730409E04Rik | chr4:126609817-126614371  | 0.7398   | 0.7843   | 0.0842  | 0.895868 |
| Trav12-1      | chr14:53538259-53538738   | 4.9917   | 5.4142   | 0.1172  | 0.902369 |
| Peli1         | chr11:21091290-21150323   | 41.5379  | 42.3328  | 0.0273  | 0.776354 |
| 5330438D12Rik | chr10:116581280-116583515 | 3.8260   | 3.9544   | 0.0476  | 0.881045 |
| Sept8         | chr11:53519256-53549565   | 1.2840   | 1.3262   | 0.0467  | 0.889079 |
| Gm17235       | chr11:78576236-78577350   | 1.3413   | 1.4256   | 0.0880  | 0.873602 |
| Arl4d         | chr11:101665540-101667832 | 1.9475   | 2.0611   | 0.0818  | 0.876551 |
| Gps1          | chr11:120784271-120789102 | 8.1177   | 8.0993   | -0.0033 | 0.986577 |
| Smc6          | chr12:11265885-11319785   | 43.7296  | 43.7612  | 0.0010  | 0.996169 |
| Nudt14        | chr12:112934732-112942118 | 16.7128  | 16.4853  | -0.0198 | 0.956741 |
| Actn2         | chr13:12269425-12340760   | 0.6571   | 0.7048   | 0.1012  | 0.894415 |
| 2010111I01Rik | chr13:63014933-63326096   | 18.3333  | 18.7536  | 0.0327  | 0.894356 |
| Ywhah         | chr5:33018815-33027966    | 22.4443  | 22.9355  | 0.0312  | 0.832459 |
| Fbxl5         | chr5:43744615-43821639    | 16.6050  | 16.6087  | 0.0003  | 0.998468 |
| Nyap1         | chr5:137730882-137741607  | 1.1726   | 1.2190   | 0.0561  | 0.905348 |
| Nudt1         | chr5:140331859-140338137  | 10.3323  | 10.2212  | -0.0156 | 0.955282 |
| Zfandf        | chr7:84615053-84679361    | 67.9783  | 68.1484  | 0.0036  | 0.976651 |
| 2210018M11Rik | chr7:98590614-98656569    | 20.3024  | 20.6879  | 0.0271  | 0.730209 |
| Snora23       | chr7:110046363-110046547  | 106.2364 | 109.7132 | 0.0465  | 0.944963 |
| Ddx19a        | chr8:110974995-110997800  | 6.8229   | 6.7974   | -0.0054 | 0.977590 |
| Pxk           | chr14:8098212-8165111     | 16.3554  | 16.3228  | -0.0029 | 0.985017 |
| 1810062O18Rik | chr14:20546078-20570687   | 2.9388   | 3.0588   | 0.0577  | 0.907015 |
| Cideb         | chr14:55754044-55758458   | 2.6335   | 2.7567   | 0.0660  | 0.937281 |
| Ccdc78        | chr17:25786579-25790513   | 4.2777   | 4.4242   | 0.0486  | 0.896897 |
| Zfp422-rs1    | chr17:33293836-33305745   | 3.7551   | 3.6427   | -0.0439 | 0.947707 |
| BC023719      | chr17:36111425-36117121   | 2.8614   | 2.9917   | 0.0642  | 0.866855 |
| Ppp1r21       | chr17:88530123-88588365   | 14.7889  | 15.0984  | 0.0299  | 0.740353 |
| Rpl18-ps1     | chr1:60900897-60901422    | 5.4477   | 5.2684   | -0.0483 | 0.936196 |
| Cerkl         | chr2:79330542-79456785    | 9.2335   | 9.4837   | 0.0386  | 0.910449 |
| Rmdn3         | chr2:119137000-119157034  | 8.4921   | 8.7111   | 0.0367  | 0.810169 |
| Dcun1d1       | chr3:35892104-35937445    | 6.9094   | 7.0707   | 0.0333  | 0.842986 |
| Kpna4         | chr3:69067148-69127113    | 22.8641  | 22.9114  | 0.0030  | 0.982587 |
| Ampd2         | chr3:108074061-108086651  | 10.7528  | 10.7591  | 0.0008  | 0.995264 |
| Sars          | chr3:108424864-108445209  | 49.1340  | 49.2588  | 0.0037  | 0.981220 |
| Lrrc39        | chr3:116562972-116583134  | 2.6205   | 2.7057   | 0.0461  | 0.821995 |
| Adprhl2       | chr4:126316046-126321703  | 16.6947  | 17.0983  | 0.0345  | 0.838668 |
| Plekhg5       | chr4:152072497-152115400  | 1.6634   | 1.6347   | -0.0251 | 0.958709 |
| 9430065F17Rik | chr13:67553233-67564009   | 0.6517   | 0.6046   | -0.1081 | 0.921807 |
| Gm8425        | chr16:36778833-36779602   | 0.8476   | 0.9192   | 0.1170  | 0.792263 |
| Naaladl1      | chr19:6105781-6115792     | 0.2561   | 0.2835   | 0.1467  | 0.850605 |
| Klf4          | chr4:55527142-55532466    | 0.3073   | 0.3390   | 0.1419  | 0.894171 |
| Rwdd1         | chr10:33996554-34019624   | 15.4004  | 15.2410  | -0.0150 | 0.971900 |
| Pdxk          | chr10:78436743-78464975   | 3.5215   | 3.6067   | 0.0345  | 0.846105 |
| NA            | chr10:79540245-79541960   | 12.4276  | 12.7592  | 0.0380  | 0.890191 |
| Gm25930       | chr11:53390401-53390508   | 8.5889   | 7.7830   | -0.1422 | 0.930917 |
| Srebfl        | chr11:60199088-60222581   | 23.0305  | 23.0751  | 0.0028  | 0.987061 |
| Chad          | chr11:94565046-94569127   | 0.7115   | 0.6768   | -0.0721 | 0.942465 |

|               |                           |          |          |         |          |
|---------------|---------------------------|----------|----------|---------|----------|
| Rara          | chr11:98927817-98974942   | 10.9959  | 11.2810  | 0.0369  | 0.874416 |
| Arhgap27os2   | chr11:103355700-103361092 | 0.8450   | 0.8092   | -0.0624 | 0.922573 |
| Cdc42ep4      | chr11:113726849-113751881 | 1.6457   | 1.6960   | 0.0434  | 0.846038 |
| Fads6         | chr11:115279621-115297663 | 1.7798   | 1.8308   | 0.0408  | 0.814371 |
| Tbcd          | chr11:121451948-121617164 | 15.6805  | 15.6953  | 0.0014  | 0.992942 |
| Frmf6         | chr12:70825513-70902232   | 9.2921   | 9.5072   | 0.0330  | 0.840458 |
| Ptgr2         | chr12:84285231-84315832   | 7.3771   | 7.3675   | -0.0019 | 0.992592 |
| 4930427A07Rik | chr12:113156420-113165456 | 3.4483   | 3.5532   | 0.0432  | 0.904241 |
| Nedd9         | chr13:41309915-41487320   | 64.1402  | 64.4209  | 0.0063  | 0.946985 |
| Tmem170b      | chr13:41606215-41641347   | 5.2786   | 5.3925   | 0.0308  | 0.847857 |
| Ctsl          | chr13:64363213-64370306   | 1.8998   | 1.9850   | 0.0634  | 0.908311 |
| Dhfr          | chr13:92354782-92389053   | 6.1782   | 6.1650   | -0.0031 | 0.977121 |
| Zfyve16       | chr13:92487107-92530868   | 8.4562   | 8.6478   | 0.0323  | 0.869989 |
| Gm6404        | chr13:116153780-116154134 | 11.5476  | 12.0142  | 0.0572  | 0.874348 |
| Smim20        | chr5:53267105-53283510    | 5.0074   | 5.1345   | 0.0362  | 0.883672 |
| Triap1        | chr5:115341224-115343569  | 12.8510  | 13.2050  | 0.0392  | 0.886316 |
| Rabgef1       | chr5:130171797-130214342  | 7.2074   | 7.1902   | -0.0034 | 0.987977 |
| Ncf1          | chr5:134220052-134229625  | 4.5015   | 4.4608   | -0.0131 | 0.954116 |
| Bcl7b         | chr5:135168282-135181855  | 15.3529  | 15.3097  | -0.0041 | 0.986542 |
| Fis1          | chr5:136953274-136966234  | 48.3752  | 49.5814  | 0.0355  | 0.923424 |
| Gm15753       | chr5:137720353-137721740  | 1.5937   | 1.5397   | -0.0497 | 0.957025 |
| Chst12        | chr5:140505549-140525724  | 5.7177   | 5.6822   | -0.0090 | 0.974814 |
| Tmem209       | chr6:30479052-30509783    | 10.7292  | 10.7472  | 0.0024  | 0.984373 |
| Trbv1         | chr6:40891295-40891885    | 62.8560  | 64.9038  | 0.0463  | 0.917486 |
| Pyurf         | chr6:57686575-57692078    | 5.5004   | 5.6555   | 0.0401  | 0.866338 |
| St3gal5       | chr6:72097612-72154570    | 1.2659   | 1.2422   | -0.0273 | 0.920672 |
| Suclg1        | chr6:73248381-73276911    | 13.7474  | 14.0304  | 0.0294  | 0.847977 |
| Ccdc142os     | chr6:83106607-83109054    | 8.6404   | 8.5804   | -0.0101 | 0.972824 |
| Rab7          | chr6:87999105-88045270    | 18.3062  | 18.7290  | 0.0329  | 0.870646 |
| 4933440N22Rik | chr6:117907109-117907760  | 20.7470  | 20.6131  | -0.0093 | 0.953903 |
| A230083G16Rik | chr6:124916862-124925844  | 1.8737   | 1.7677   | -0.0840 | 0.949286 |
| Mrps35        | chr6:147042763-147070903  | 7.2779   | 7.4295   | 0.0297  | 0.765178 |
| Relb          | chr7:19606216-19629438    | 22.0919  | 22.1488  | 0.0037  | 0.973441 |
| Mrps12        | chr7:28739640-28741820    | 20.5277  | 20.4937  | -0.0024 | 0.990637 |
| Gm12774       | chr7:34383658-34384074    | 4.6644   | 4.9357   | 0.0816  | 0.884721 |
| Sytl2         | chr7:90348698-90410438    | 12.1167  | 12.1247  | 0.0009  | 0.993998 |
| Ccdc90b       | chr7:92561148-92582294    | 8.1383   | 8.3576   | 0.0384  | 0.878006 |
| Rnf169        | chr7:99920256-99980458    | 10.8946  | 10.9128  | 0.0024  | 0.988477 |
| Usp47         | chr7:112023505-112111386  | 44.7487  | 44.8858  | 0.0044  | 0.971641 |
| Sult1a1       | chr7:126672864-126676432  | 2.7347   | 2.8658   | 0.0676  | 0.931469 |
| Mylpf         | chr7:127211607-127214298  | 7.2353   | 7.4795   | 0.0479  | 0.894682 |
| Cdkn1c        | chr7:143458349-143461050  | 1.1273   | 1.1896   | 0.0777  | 0.880766 |
| Elmo3         | chr8:105305600-105310623  | 7.1455   | 7.3314   | 0.0371  | 0.893062 |
| Slc12a4       | chr8:105943589-105966115  | 6.4130   | 6.3984   | -0.0033 | 0.988029 |
| 6430571L13Rik | chr9:107340601-107352422  | 1.1691   | 1.2390   | 0.0838  | 0.920280 |
| Uba7          | chr9:107975504-107984060  | 36.7832  | 37.6226  | 0.0326  | 0.909022 |
| NA            | chr9:124438995-124440899  | 5.8933   | 6.2567   | 0.0863  | 0.889805 |
| Slc9a6        | chrX:56609756-56664230    | 7.2925   | 7.2773   | -0.0030 | 0.987888 |
| 2610002M06Rik | chrX:107782750-107816334  | 7.4605   | 7.4346   | -0.0050 | 0.985057 |
| Armxc1        | chrX:134717962-134721917  | 1.1838   | 1.1560   | -0.0343 | 0.930161 |
| Tatdn1        | chr15:58890152-58933730   | 6.4011   | 6.6275   | 0.0501  | 0.890229 |
| Tmem71        | chr15:66526211-66561046   | 42.3097  | 43.1824  | 0.0295  | 0.869403 |
| Plxnb2        | chr15:89155548-89171120   | 0.6715   | 0.6569   | -0.0316 | 0.966636 |
| Rpl39-ps      | chr15:102634981-102635336 | 3.7474   | 3.5611   | -0.0736 | 0.922929 |
| Ttc5          | chr14:50765414-50785518   | 28.5455  | 28.4917  | -0.0027 | 0.989392 |
| Trav10        | chr14:53505789-53506286   | 7.2404   | 6.9595   | -0.0571 | 0.951086 |
| Traj30        | chr14:54189865-54189924   | 32.7810  | 31.3869  | -0.0627 | 0.953613 |
| Gm4491        | chr14:57112505-57115883   | 0.4748   | 0.4309   | -0.1399 | 0.913070 |
| Gm6904        | chr14:59244440-59260216   | 6.3385   | 6.5451   | 0.0463  | 0.888974 |
| Mzt1          | chr14:99034543-99046136   | 18.4185  | 18.9118  | 0.0381  | 0.894242 |
| Rps2          | chr17:24718115-24721929   | 111.0963 | 113.3699 | 0.0292  | 0.898787 |
| Gm20522       | chr17:35122737-35126440   | 4.4200   | 4.3230   | -0.0320 | 0.926590 |
| Man2a1        | chr17:64600735-64755110   | 28.7601  | 28.8985  | 0.0069  | 0.918468 |
| Nagpa         | chr16:5195288-5204012     | 14.1496  | 14.4656  | 0.0319  | 0.890665 |
| Poglut1       | chr16:38525136-38550258   | 13.3963  | 13.6706  | 0.0292  | 0.850929 |
| 1110004E09Rik | chr16:90925808-90934927   | 7.7731   | 8.2660   | 0.0887  | 0.885252 |
| Ms4a4b        | chr19:11443552-11463549   | 80.3152  | 81.9229  | 0.0286  | 0.885500 |
| 5830428H23Rik | chr19:61053839-61140840   | 9.5612   | 9.8254   | 0.0393  | 0.902128 |
| Ino8odos      | chr1:63114470-63158290    | 8.0050   | 8.2470   | 0.0430  | 0.897325 |
| Fam134a       | chr1:75142785-75147909    | 34.2745  | 34.9671  | 0.0289  | 0.869168 |
| Mpc2          | chr1:165461036-165481214  | 6.4597   | 6.6115   | 0.0335  | 0.747671 |



|               |                           |         |         |         |          |
|---------------|---------------------------|---------|---------|---------|----------|
| Usp14         | chr18:9995431-10045119    | 9.5998  | 9.6083  | 0.0013  | 0.993070 |
| Camk4         | chr18:32939040-33195767   | 18.1377 | 18.1939 | 0.0045  | 0.963958 |
| Egr1          | chr18:34859822-34864984   | 5.2194  | 5.3356  | 0.0318  | 0.871832 |
| Fchsdl        | chr18:37957430-37969774   | 7.5350  | 7.7270  | 0.0363  | 0.890537 |
| Nr3c1         | chr18:39410544-39491301   | 36.0133 | 36.6148 | 0.0239  | 0.740399 |
| Nars          | chr18:64499664-64516557   | 59.6973 | 59.7613 | 0.0015  | 0.994422 |
| Cep192        | chr18:67800106-67885168   | 28.3320 | 28.4077 | 0.0038  | 0.977622 |
| Gm13194       | chr2:4942173-4942484      | 2.0547  | 2.2181  | 0.1104  | 0.909578 |
| Mrpl41        | chr2:24974116-24975098    | 37.6413 | 37.5601 | -0.0031 | 0.991445 |
| A430018G15Rik | chr2:52425011-52434885    | 0.8674  | 0.8401  | -0.0461 | 0.770980 |
| Hipk3         | chr2:104426480-104494446  | 27.0926 | 27.5602 | 0.0247  | 0.850484 |
| Usp8          | chr2:126707327-126759297  | 26.8704 | 26.9358 | 0.0035  | 0.973929 |
| Pced1a        | chr2:130417246-130424701  | 8.4432  | 8.4476  | 0.0008  | 0.995852 |
| Jag1          | chr2:137081455-137116644  | 0.1642  | 0.1551  | -0.0818 | 0.912812 |
| Acot8         | chr2:164792767-164804882  | 12.4063 | 12.7130 | 0.0352  | 0.861657 |
| 1500012F01Rik | chr2:167062933-167065862  | 32.1689 | 32.0930 | -0.0034 | 0.992989 |
| mt-Nd5        | chrM:11741-13565          | 75.1541 | 75.1351 | -0.0004 | 0.998809 |
| Gyg           | chr3:20122083-20155317    | 17.7066 | 18.1017 | 0.0318  | 0.873722 |
| Ppid          | chr3:79591341-79603650    | 27.0666 | 27.1279 | 0.0033  | 0.987065 |
| Sh2d2a        | chr3:87846754-87855722    | 31.0654 | 31.1470 | 0.0038  | 0.982553 |
| Slc16a1       | chr3:104638667-104658462  | 21.2199 | 21.1941 | -0.0018 | 0.995332 |
| Cdc14a        | chr3:116272552-116424032  | 4.6238  | 4.6152  | -0.0027 | 0.993596 |
| Tmem68        | chr4:3549040-3574853      | 10.2323 | 10.2183 | -0.0020 | 0.993171 |
| Ccl27a        | chr4:41769466-41774247    | 0.5623  | 0.6010  | 0.0960  | 0.887939 |
| Gne           | chr4:44034074-44084177    | 9.2571  | 9.2474  | -0.0015 | 0.994870 |
| Tmod1         | chr4:46038934-46116032    | 6.0235  | 6.0052  | -0.0044 | 0.981774 |
| A1314180      | chr4:58798910-58912749    | 13.5656 | 13.8076 | 0.0255  | 0.787866 |
| Bmp8b         | chr4:123105164-123132099  | 1.5723  | 1.6310  | 0.0528  | 0.869680 |
| Lsm10         | chr4:126096622-126098584  | 17.8870 | 18.3311 | 0.0354  | 0.860363 |
| Mtfr1l        | chr4:134525549-134535387  | 12.8959 | 12.9055 | 0.0011  | 0.992823 |
| Pex10         | chr4:155067015-155072433  | 5.7334  | 5.7089  | -0.0062 | 0.979063 |
| Cptp          | chr4:155864722-155869440  | 6.2380  | 6.2147  | -0.0054 | 0.977221 |
| Efnb3         | chr11:69554091-69560205   | 0.2634  | 0.2864  | 0.1209  | 0.895723 |
| Gm11652       | chr11:105773517-105774784 | 0.6452  | 0.5981  | -0.1092 | 0.937244 |
| Gm26839       | chr12:99563840-99620038   | 0.8195  | 0.9158  | 0.1602  | 0.910874 |
| Pde8b         | chr13:95024453-95250336   | 0.3590  | 0.3490  | -0.0406 | 0.958845 |
| Gm25091       | chr5:146834833-146834904  | 14.6540 | 15.8726 | 0.1152  | 0.901866 |
| Gm15500       | chr7:114705215-114706235  | 0.7429  | 0.8209  | 0.1440  | 0.883263 |
| Slurp1        | chr15:74726643-74728026   | 1.4587  | 1.5944  | 0.1283  | 0.841234 |
| Slc39a2       | chr14:51892888-51896745   | 0.5622  | 0.5962  | 0.0847  | 0.908323 |
| Trav6-7-dv9   | chr14:53709901-53710417   | 5.6212  | 6.0382  | 0.1032  | 0.904145 |
| Mmp14         | chr14:54431603-54441258   | 0.3084  | 0.3303  | 0.0991  | 0.840144 |
| 4930562C15Rik | chr16:4835415-4867691     | 0.1850  | 0.2008  | 0.1187  | 0.895089 |
| 1700007L15Rik | chr16:33379854-33380727   | 3.5428  | 3.7871  | 0.0962  | 0.895314 |
| Cacna1b       | chr2:24603886-24763152    | 0.0636  | 0.0590  | -0.1084 | 0.925475 |
| 4933423P22Rik | chr2:90479235-90488425    | 0.6662  | 0.7052  | 0.0820  | 0.932505 |
| Zc2hc1a       | chr3:7503425-7553848      | 0.2442  | 0.2321  | -0.0733 | 0.928105 |
| Il2           | chr3:37120522-37125959    | 2.9029  | 3.1083  | 0.0986  | 0.917691 |
| Gm17213       | chr3:69431008-69432368    | 0.4787  | 0.5278  | 0.1410  | 0.897751 |
| Ccl3          | chr11:83647843-83649355   | 1.8467  | 1.7488  | -0.0786 | 0.949922 |
| Gm15573       | chr6:53045883-53046423    | 2.5364  | 2.4125  | -0.0722 | 0.954204 |
| Dpep2         | chr8:105984943-105996423  | 0.2401  | 0.2234  | -0.1041 | 0.940631 |
| Gspt2         | chrX:94636068-94643244    | 0.1874  | 0.1716  | -0.1272 | 0.935708 |
| 4930439A04Rik | chr1:37329666-37334172    | 1.6070  | 1.5066  | -0.0931 | 0.955744 |
| Bnip3         | chr7:138890835-138909519  | 1.2053  | 1.3447  | 0.1579  | 0.857986 |
| Ap3d1         | chr10:80706977-80742211   | 38.3130 | 38.4833 | 0.0064  | 0.959358 |
| Appl2         | chr10:83600032-83648738   | 4.1920  | 4.1840  | -0.0028 | 0.992219 |
| Ankrd52       | chr10:128377114-128408704 | 6.9773  | 7.1183  | 0.0289  | 0.887112 |
| Suox          | chr10:128669886-128673918 | 23.7776 | 23.7930 | 0.0009  | 0.996684 |
| Mpg           | chr11:32226504-32232700   | 10.3469 | 10.5649 | 0.0301  | 0.821310 |
| Clint1        | chr11:45852050-45910625   | 36.4960 | 36.7017 | 0.0081  | 0.910421 |
| Mam1l         | chr11:50255633-50292311   | 6.3733  | 6.3758  | 0.0006  | 0.998076 |
| Gm10392       | chr11:77516659-77519198   | 0.4869  | 0.4562  | -0.0939 | 0.937623 |
| Tubd1         | chr11:86544990-86567360   | 4.1743  | 4.1308  | -0.0151 | 0.977292 |
| Tubg1         | chr11:101119937-101126419 | 9.2258  | 9.4337  | 0.0322  | 0.903841 |
| Alyref        | chr11:120592120-120598365 | 31.3973 | 31.4509 | 0.0025  | 0.989462 |
| Gm4419        | chr12:21417910-21419803   | 0.9691  | 1.0219  | 0.0764  | 0.911532 |
| Ifrd1         | chr12:40201566-40248504   | 10.6266 | 10.8426 | 0.0290  | 0.878123 |
| Tbce          | chr13:13997948-14039638   | 22.2413 | 22.6220 | 0.0245  | 0.795783 |
| Serp1b1a      | chr13:32842091-32851185   | 1.7549  | 1.8288  | 0.0596  | 0.909997 |
| Atg10         | chr13:90935348-91223987   | 4.4521  | 4.5866  | 0.0429  | 0.774518 |

|               |                           |          |          |         |          |
|---------------|---------------------------|----------|----------|---------|----------|
| Nos3          | chr5:24364809-24384474    | 0.1292   | 0.1400   | 0.1158  | 0.922618 |
| Smarcd3       | chr5:24590817-24602012    | 8.7664   | 8.9561   | 0.0309  | 0.889156 |
| Nrbp1         | chr5:31240863-31251566    | 43.6099  | 43.7917  | 0.0060  | 0.948166 |
| Arl6ip4       | chr5:124116088-124118196  | 23.9515  | 23.9349  | -0.0010 | 0.996125 |
| Eif2b1        | chr5:124570212-124579131  | 14.0353  | 14.0116  | -0.0024 | 0.993367 |
| Cpsf4         | chr5:145167212-145182041  | 15.2959  | 15.3405  | 0.0042  | 0.974520 |
| Gimap1os      | chr6:48738345-48740621    | 52.7026  | 52.6934  | -0.0003 | 0.999345 |
| Rps15-ps2     | chr6:58017489-58017975    | 1.6031   | 1.5108   | -0.0855 | 0.943240 |
| Gfpt1         | chr6:87042845-87092197    | 11.0782  | 11.1281  | 0.0065  | 0.952852 |
| Itpr1         | chr6:108213117-108551109  | 23.7823  | 23.8705  | 0.0053  | 0.973387 |
| Gm26951       | chr6:128313336-128313997  | 1.3297   | 1.2463   | -0.0936 | 0.926830 |
| Rpl18-ps2     | chr6:128313337-128313960  | 1.2977   | 1.2163   | -0.0936 | 0.926830 |
| Zfp235        | chr7:24134173-24142266    | 4.1339   | 4.1007   | -0.0116 | 0.971876 |
| Rras          | chr7:45017977-45021646    | 2.8937   | 2.8399   | -0.0271 | 0.965525 |
| Sphk2         | chr7:45709466-45718002    | 11.7208  | 11.7475  | 0.0033  | 0.969374 |
| Doc2a         | chr7:126847415-126852705  | 5.9230   | 5.8851   | -0.0093 | 0.980304 |
| Fgf20         | chr8:40279165-40308331    | 0.4172   | 0.4461   | 0.0968  | 0.885804 |
| Mcm5          | chr8:75109527-75128439    | 61.6424  | 62.6785  | 0.0240  | 0.846771 |
| Dnaja2        | chr8:85537639-85555271    | 64.9324  | 66.1939  | 0.0278  | 0.907071 |
| Gm15210       | chr8:100030486-100032147  | 8.4287   | 8.3979   | -0.0053 | 0.988777 |
| Smpd3         | chr8:106252547-106337988  | 0.3521   | 0.3764   | 0.0964  | 0.904849 |
| Taf1d         | chr9:15306213-15312104    | 60.1396  | 61.3788  | 0.0294  | 0.910479 |
| Ecsit         | chr9:22072245-22085438    | 18.2173  | 18.2331  | 0.0013  | 0.995294 |
| Cep162        | chr9:87189572-87255536    | 6.5299   | 6.5315   | 0.0004  | 0.998567 |
| Slc25a36      | chr9:97075596-97111157    | 15.5994  | 15.8665  | 0.0245  | 0.782878 |
| Klh18         | chr9:110425927-110476694  | 4.1752   | 4.1504   | -0.0086 | 0.975489 |
| Myd88         | chr9:119335933-119341411  | 24.2698  | 24.7578  | 0.0287  | 0.848759 |
| Slc10a3       | chrX:74369216-74373349    | 21.7675  | 22.2499  | 0.0316  | 0.902805 |
| Laptm4b       | chr15:34238025-34284295   | 3.8028   | 3.7638   | -0.0149 | 0.977110 |
| Cacna1i       | chr15:80287237-80398279   | 0.5258   | 0.5191   | -0.0186 | 0.951388 |
| Arsa          | chr15:89472475-89477425   | 4.8769   | 4.9885   | 0.0327  | 0.887998 |
| Xkr6          | chr14:63606502-63820809   | 0.8613   | 0.8490   | -0.0208 | 0.965234 |
| Lcp1          | chr14:75131100-75230842   | 162.8398 | 163.9535 | 0.0098  | 0.659475 |
| Stk24         | chr14:121286342-121379334 | 69.5171  | 69.8787  | 0.0075  | 0.905307 |
| Fahd1         | chr17:24848895-24850302   | 3.0684   | 3.1760   | 0.0497  | 0.953544 |
| Stub1         | chr17:25830635-25833361   | 47.8734  | 47.9728  | 0.0030  | 0.987433 |
| Trmt2a        | chr16:18248678-18254772   | 17.1791  | 17.5014  | 0.0268  | 0.816764 |
| Gm4462        | chr16:20664115-20664607   | 3.7849   | 3.9888   | 0.0757  | 0.918099 |
| Slc12a8       | chr16:33517327-33664135   | 1.5346   | 1.5137   | -0.0198 | 0.978818 |
| Hcls1         | chr16:36934982-36963212   | 131.0989 | 131.8092 | 0.0078  | 0.948222 |
| Sptbn2        | chr19:4711207-4752353     | 0.3614   | 0.3779   | 0.0644  | 0.938411 |
| Gm20417       | chr19:5797561-5798549     | 821.1324 | 822.7112 | 0.0028  | 0.992321 |
| Gm22680       | chr19:8725340-8725409     | 20.4399  | 19.5309  | -0.0656 | 0.948416 |
| Tut1          | chr19:8953849-8966207     | 22.8803  | 23.2968  | 0.0260  | 0.762307 |
| D030056L22Rik | chr19:18713192-18718428   | 10.2922  | 10.5358  | 0.0338  | 0.917598 |
| Rbm20         | chr19:53677305-53867080   | 0.2350   | 0.2469   | 0.0710  | 0.933236 |
| Zdhhc6        | chr19:55298300-55316032   | 23.1576  | 23.1602  | 0.0002  | 0.999177 |
| Gm15853       | chr1:166379838-166380493  | 2.5868   | 2.7612   | 0.0941  | 0.898198 |
| Surf6         | chr2:26888627-26902879    | 17.2292  | 17.5847  | 0.0295  | 0.894058 |
| Naif1         | chr2:32450456-32456953    | 4.3488   | 4.3273   | -0.0071 | 0.984032 |
| Mtx2          | chr2:74825802-74878431    | 9.4017   | 9.3916   | -0.0016 | 0.995814 |
| Nup35         | chr2:80617235-80658906    | 3.7101   | 3.6821   | -0.0109 | 0.980617 |
| Fnbp4         | chr2:90745369-90781021    | 34.7272  | 34.9040  | 0.0073  | 0.936567 |
| Itpka         | chr2:119742336-119751263  | 0.4286   | 0.4024   | -0.0909 | 0.943723 |
| Kif16b        | chr2:142617473-142901531  | 10.1499  | 10.1773  | 0.0039  | 0.978802 |
| Bbs7          | chr3:36573141-36613477    | 0.2543   | 0.2398   | -0.0847 | 0.939862 |
| Gm17641       | chr3:68867916-68870266    | 3.6481   | 3.6143   | -0.0134 | 0.965786 |
| Gatb          | chr3:85574118-85655622    | 3.9436   | 3.9456   | 0.0007  | 0.994124 |
| Zbtb7b        | chr3:89377643-89394776    | 39.2517  | 39.3829  | 0.0048  | 0.977729 |
| Gm15265       | chr3:94998799-95004869    | 21.0232  | 20.9972  | -0.0018 | 0.991156 |
| Gm26516       | chr4:130774816-130779246  | 2.6928   | 2.8097   | 0.0613  | 0.915945 |
| Capzb         | chr4:139192898-139291818  | 59.5720  | 59.6824  | 0.0027  | 0.991214 |
| Clstn1        | chr4:149586467-149648899  | 11.3920  | 11.3955  | 0.0004  | 0.998613 |
| Tnfrsf14      | chr4:154922209-154928563  | 27.8194  | 28.4432  | 0.0320  | 0.881048 |
| O610009B22Rik | chr11:51685385-51688874   | 4.1267   | 4.3385   | 0.0722  | 0.912548 |
| Fkbp10        | chr11:100415696-100424824 | 0.2256   | 0.2123   | -0.0880 | 0.948350 |
| Gm26888       | chr11:119151650-119156994 | 0.2356   | 0.2229   | -0.0800 | 0.947877 |
| Rad51b        | chr12:79297350-79508656   | 1.3944   | 1.3550   | -0.0414 | 0.954425 |
| Yes1          | chr5:32611170-32687066    | 0.1623   | 0.1528   | -0.0870 | 0.955714 |
| Trav14-2      | chr14:53640700-53641224   | 13.2997  | 12.6298  | -0.0746 | 0.941071 |
| Opn3          | chr1:175662420-175692776  | 0.7056   | 0.7552   | 0.0980  | 0.908396 |

|               |                           |          |          |         |          |
|---------------|---------------------------|----------|----------|---------|----------|
| Ppp1r26       | chr2:28446799-28455508    | 0.1368   | 0.1303   | -0.0703 | 0.933405 |
| Gm3362        | chr15:37943326-37943792   | 1.2469   | 1.1739   | -0.0871 | 0.933736 |
| Eqtn          | chr4:94907266-94928843    | 0.4870   | 0.5422   | 0.1549  | 0.930432 |
| Samd1         | chr8:83997671-84000386    | 26.6748  | 27.2402  | 0.0303  | 0.912901 |
| Gm15890       | chr8:94379236-94386972    | 2.3402   | 2.4443   | 0.0628  | 0.905853 |
| Cd164         | chr10:41519499-41531042   | 79.6660  | 81.0826  | 0.0254  | 0.871092 |
| Vma21         | chrX:71815923-71839757    | 1.1842   | 1.2171   | 0.0395  | 0.832410 |
| NA            | chr1:153905300-153916910  | 1.2470   | 1.1831   | -0.0759 | 0.894975 |
| Tmem19        | chr10:115340738-115362262 | 15.2374  | 15.5400  | 0.0284  | 0.813811 |
| Tmem248       | chr5:130219743-130243765  | 22.6671  | 23.0500  | 0.0242  | 0.775216 |
| Eef2k         | chr7:120842830-120907219  | 2.8846   | 2.8834   | -0.0006 | 0.998211 |
| 6330419J24Rik | chrX:56374609-56377799    | 2.7499   | 2.8294   | 0.0411  | 0.941029 |
| Mina          | chr16:59471774-59492461   | 13.7186  | 13.7695  | 0.0053  | 0.974910 |
| Tpps2         | chr18:25127222-25169007   | 3.3245   | 3.3269   | 0.0010  | 0.995073 |
| Gm7180        | chr7:81222361-81222874    | 1.7608   | 1.6874   | -0.0615 | 0.935572 |
| Gm6899        | chr11:26593240-26593862   | 1.7947   | 1.7119   | -0.0681 | 0.946608 |
| Abcd4         | chr12:84602530-84617466   | 5.3075   | 5.2857   | -0.0059 | 0.974093 |
| Naaa          | chr5:92257658-92278170    | 2.5931   | 2.5750   | -0.0101 | 0.977457 |
| Pon3          | chr6:5220851-5256286      | 3.5323   | 3.6207   | 0.0357  | 0.957747 |
| Art4          | chr6:136848450-136857733  | 1.8155   | 1.8723   | 0.0444  | 0.909537 |
| Zhx1          | chr15:58047002-58076541   | 17.0073  | 17.0785  | 0.0060  | 0.943838 |
| Dleu7         | chr14:62276230-62292979   | 0.5641   | 0.5936   | 0.0736  | 0.942825 |
| Gm17133       | chr17:64748849-64754096   | 12.7372  | 13.2095  | 0.0525  | 0.896760 |
| Klh6          | chr16:19946498-19983037   | 87.0804  | 87.5338  | 0.0075  | 0.958284 |
| Ccdc14        | chr16:34690615-34725194   | 3.5686   | 3.6430   | 0.0298  | 0.831583 |
| NA            | chr1:137928169-137930273  | 0.3387   | 0.3661   | 0.1122  | 0.931175 |
| Arhgap30      | chr1:171388953-171410298  | 105.9478 | 106.6094 | 0.0090  | 0.820451 |
| Gm13562       | chr2:26352644-26371952    | 9.1482   | 9.3933   | 0.0381  | 0.864558 |
| Endog         | chr2:30171492-30174069    | 13.3328  | 13.6383  | 0.0327  | 0.847846 |
| Gm6733        | chr11:72833460-72835380   | 0.7878   | 0.8404   | 0.0932  | 0.923674 |
| Zfp941        | chr7:140807448-140822178  | 0.2582   | 0.2423   | -0.0920 | 0.957075 |
| Muc1          | chr3:89229056-89233381    | 0.9043   | 0.9578   | 0.0828  | 0.918222 |
| A3galt2       | chr4:128755363-128769298  | 0.2267   | 0.2172   | -0.0614 | 0.959598 |
| Cetn4         | chr3:37307748-37312708    | 0.2434   | 0.2614   | 0.1032  | 0.937829 |
| Asc2          | chr11:4637746-4685699     | 13.7937  | 13.8456  | 0.0054  | 0.957011 |
| Paip1         | chr13:119428600-119458218 | 23.4587  | 23.5298  | 0.0044  | 0.978108 |
| Dcaf13        | chr15:39112873-39146856   | 52.3227  | 52.5152  | 0.0053  | 0.967627 |
| Slc9a5        | chr8:105348257-105369881  | 0.8590   | 0.8164   | -0.0733 | 0.951902 |
| Oaz1          | chr10:80826555-80829290   | 11.5190  | 11.5360  | 0.0021  | 0.973472 |
| Gm16239       | chr10:99179183-99184610   | 0.3581   | 0.3428   | -0.0627 | 0.955722 |
| Cdk2          | chr10:128697938-128705051 | 23.6816  | 24.0992  | 0.0252  | 0.901167 |
| Gm11655       | chr11:108181849-108194126 | 7.1762   | 7.0806   | -0.0193 | 0.980754 |
| 2310015A10Rik | chr12:80120547-80132844   | 16.2782  | 16.5845  | 0.0269  | 0.906571 |
| Numb          | chr12:83794033-83921934   | 11.2061  | 11.4474  | 0.0307  | 0.902971 |
| Fam172a       | chr13:77708689-78166238   | 19.3732  | 19.7228  | 0.0258  | 0.866515 |
| Glccl1        | chr6:8509599-8597548      | 16.2875  | 16.5894  | 0.0265  | 0.899848 |
| Zfp108        | chr7:24257643-24261914    | 0.6129   | 0.6431   | 0.0693  | 0.905755 |
| Zfp940        | chr7:29833619-29853669    | 2.7419   | 2.8055   | 0.0331  | 0.905159 |
| Zfp146        | chr7:30161273-30169727    | 36.6787  | 36.7885  | 0.0043  | 0.984093 |
| Gm26935       | chr7:30737652-30748437    | 1.1335   | 1.0439   | -0.1189 | 0.943677 |
| Gm1966        | chr7:106601242-106604035  | 123.8081 | 125.7879 | 0.0229  | 0.865912 |
| Stk26         | chrX:50841046-50893097    | 28.1519  | 28.2664  | 0.0059  | 0.974220 |
| Fzd6          | chr15:39006279-39038186   | 0.4045   | 0.3940   | -0.0380 | 0.943786 |
| Gm16576       | chr15:79742697-79757394   | 1.1835   | 1.2144   | 0.0372  | 0.853373 |
| Rarb          | chr14:16430841-16575472   | 2.6167   | 2.5814   | -0.0196 | 0.970224 |
| Tssk4         | chr14:55650181-55652539   | 1.5216   | 1.4986   | -0.0220 | 0.966651 |
| Ccr6          | chr17:8236042-8257127     | 5.6128   | 5.5767   | -0.0093 | 0.975907 |
| Fam195a       | chr17:25863697-25868738   | 1.7974   | 1.8873   | 0.0704  | 0.909968 |
| Pip5k1b       | chr19:24294793-24555872   | 0.9088   | 0.9391   | 0.0474  | 0.938322 |
| Rnf25         | chr1:74593747-74601397    | 15.3278  | 15.6271  | 0.0279  | 0.922731 |
| Cxcr4         | chr1:128588198-128592293  | 47.9467  | 48.0215  | 0.0022  | 0.993070 |
| Tor1aip1      | chr1:156004598-156036480  | 13.0119  | 13.2420  | 0.0253  | 0.883638 |
| Slc20a1       | chr2:129198763-129211616  | 28.1659  | 28.2961  | 0.0067  | 0.953825 |
| 4930402H24Rik | chr2:130706199-130906406  | 3.3972   | 3.4670   | 0.0293  | 0.920163 |
| Csf1          | chr3:107741047-107760469  | 7.3533   | 7.5389   | 0.0360  | 0.943197 |
| Rtca          | chr3:116488962-116508208  | 15.1194  | 15.4348  | 0.0298  | 0.914709 |
| Rnf20         | chr4:49632005-49656887    | 29.3220  | 29.8020  | 0.0234  | 0.883000 |
| Elovl1        | chr4:118428092-118432953  | 22.3651  | 22.4448  | 0.0051  | 0.971585 |
| Ak2           | chr4:128991957-129011529  | 54.3657  | 55.2767  | 0.0240  | 0.852822 |
| Nipal3        | chr4:135446136-135495038  | 15.6032  | 15.8814  | 0.0255  | 0.869748 |
| Trbv21        | chr6:41202754-41203044    | 2.2090   | 2.0917   | -0.0787 | 0.957973 |

|               |                           |         |         |         |          |
|---------------|---------------------------|---------|---------|---------|----------|
| Snord88a      | chr7:44250134-44250224    | 10.6765 | 10.0439 | -0.0881 | 0.957096 |
| Hmgn5         | chrX:109004533-109013404  | 2.0180  | 1.9914  | -0.0192 | 0.973325 |
| Fer1l5        | chr1:36372290-36422110    | 0.4815  | 0.5057  | 0.0709  | 0.951565 |
| Col10a1       | chr10:34389980-34397085   | 2.7114  | 2.6800  | -0.0168 | 0.973609 |
| Gm5424        | chr10:62071014-62072609   | 2.6764  | 2.7684  | 0.0488  | 0.871701 |
| Gm11427       | chr11:83254195-83260534   | 7.1384  | 7.3200  | 0.0362  | 0.919357 |
| Nt5c          | chr11:115490419-115491862 | 81.7620 | 82.2276 | 0.0082  | 0.958339 |
| Irf2bpl       | chr12:86880702-86884814   | 17.5113 | 17.8621 | 0.0286  | 0.918243 |
| Tec           | chr5:72755717-72868483    | 5.1305  | 5.2736  | 0.0397  | 0.916972 |
| Tctn1         | chr5:122241286-122264460  | 5.7745  | 5.8904  | 0.0287  | 0.849121 |
| Rasa4         | chr5:136083915-136111860  | 0.5386  | 0.5614  | 0.0597  | 0.937097 |
| Ate1          | chr7:130391525-130519961  | 17.2353 | 17.5269 | 0.0242  | 0.795535 |
| Bet1l         | chr7:140853383-140856383  | 18.6489 | 19.1129 | 0.0355  | 0.894939 |
| Ankrd10       | chr8:11611582-11635754    | 27.5049 | 27.6595 | 0.0081  | 0.907834 |
| Primpol       | chr8:46575578-46617212    | 9.8788  | 9.9120  | 0.0048  | 0.981723 |
| Mpv17l2       | chr8:70758648-70760921    | 16.9796 | 16.9687 | -0.0009 | 0.997233 |
| Herpud1       | chr8:94386437-94395377    | 49.3551 | 49.5796 | 0.0065  | 0.961982 |
| Ube2q2        | chr9:55148853-55207529    | 6.9990  | 7.0165  | 0.0036  | 0.982811 |
| Tpm1          | chr9:67022589-67049406    | 8.0190  | 8.1557  | 0.0244  | 0.832876 |
| Rnf113a1      | chrX:37191244-37192462    | 4.9721  | 4.9541  | -0.0052 | 0.987461 |
| Ocrl          | chrX:47912386-47965868    | 2.0979  | 2.0979  | 0.0000  | 0.999978 |
| Hgh1          | chr15:76368897-76371403   | 8.3850  | 8.5920  | 0.0352  | 0.843173 |
| Nudt15        | chr14:73519863-73548242   | 0.3759  | 0.3588  | -0.0670 | 0.944570 |
| Mir5134       | chr17:24234526-24234604   | 8.6190  | 8.1119  | -0.0875 | 0.950754 |
| Snora64       | chr17:24720771-24720905   | 7.8048  | 7.4341  | -0.0702 | 0.954217 |
| Ube2i         | chr17:25261915-25274622   | 26.2789 | 26.4114 | 0.0073  | 0.963173 |
| Z310039H08Rik | chr17:46772634-46773407   | 18.2785 | 18.7162 | 0.0341  | 0.922591 |
| Kpna1         | chr16:35978749-36037131   | 13.4504 | 13.4655 | 0.0016  | 0.994831 |
| Snord87       | chr1:9942462-9942549      | 12.6070 | 12.1485 | -0.0534 | 0.956858 |
| Arhgef4       | chr1:34678187-34813309    | 3.5603  | 3.6376  | 0.0310  | 0.892415 |
| Cnrm3         | chr1:36511866-36528237    | 7.1327  | 7.1479  | 0.0031  | 0.984156 |
| Hhat          | chr1:192512827-192771213  | 0.5506  | 0.5665  | 0.0412  | 0.913948 |
| 1700019L03Rik | chr2:32777380-32784428    | 1.5339  | 1.5906  | 0.0523  | 0.924144 |
| Psmc5         | chr2:34852087-34870939    | 20.8831 | 20.9474 | 0.0044  | 0.979869 |
| Casp9         | chr4:141793611-141815976  | 3.9738  | 3.9711  | -0.0010 | 0.996255 |
| Il17rc        | chr6:113471426-113483140  | 0.2234  | 0.2146  | -0.0581 | 0.957791 |
| Gm15775       | chr8:124324777-124331795  | 2.3710  | 2.3196  | -0.0316 | 0.959937 |
| Gm15563       | chr9:66572000-66582059    | 8.1985  | 8.5920  | 0.0676  | 0.934420 |
| Scarna17      | chr18:74778390-74778469   | 11.5300 | 12.2859 | 0.0916  | 0.908745 |
| Zfp935        | chr13:62454322-62466709   | 10.6937 | 10.6551 | -0.0052 | 0.989972 |
| Z310022B05Rik | chr8:124635765-124663369  | 1.6546  | 1.6989  | 0.0381  | 0.911439 |
| Gm16364       | chr10:39556070-39558062   | 5.8276  | 5.7729  | -0.0136 | 0.975101 |
| Mcm3ap        | chr10:76468970-76515856   | 17.3884 | 17.4876 | 0.0082  | 0.949150 |
| Gm11400       | chr11:3149741-3150955     | 5.0788  | 5.2401  | 0.0451  | 0.926609 |
| Ankfy1        | chr11:72690005-72772146   | 19.7864 | 20.0923 | 0.0221  | 0.864069 |
| Mrs2          | chr13:24992482-25020379   | 15.1057 | 15.1578 | 0.0050  | 0.960608 |
| Lyar          | chr5:38220469-38234306    | 17.6095 | 17.5466 | -0.0052 | 0.991192 |
| Gm15927       | chr7:3632113-3644887      | 8.3625  | 8.3597  | -0.0005 | 0.998049 |
| Zfp846        | chr9:20581324-20595194    | 7.0477  | 7.0463  | -0.0003 | 0.999283 |
| Gm10698       | chr9:33728212-33728889    | 3.0618  | 3.1756  | 0.0527  | 0.945863 |
| Tmem115       | chr9:107533944-107538656  | 18.3547 | 18.7232 | 0.0287  | 0.902543 |
| Lamb2         | chr9:108479861-108490530  | 0.2124  | 0.2035  | -0.0619 | 0.952574 |
| Tmsb15b2      | chrX:136955264-136975497  | 10.6770 | 10.9738 | 0.0396  | 0.919965 |
| Eif1ax        | chrX:159372177-159389928  | 18.8328 | 18.8562 | 0.0018  | 0.995818 |
| Trps1         | chr15:50654760-50890041   | 6.1892  | 6.2063  | 0.0040  | 0.984685 |
| Ankrd28       | chr14:31700014-31830415   | 14.6185 | 14.6832 | 0.0064  | 0.956121 |
| Rnf8          | chr17:29614789-29703359   | 29.6867 | 30.1277 | 0.0213  | 0.784468 |
| Gltscr1l      | chr17:46798115-46831413   | 8.2760  | 8.4259  | 0.0259  | 0.873687 |
| Scyl1         | chr19:5758426-5771401     | 25.4391 | 25.5344 | 0.0054  | 0.987953 |
| Ms4a1         | chr19:11250602-11266151   | 0.5857  | 0.5524  | -0.0843 | 0.953149 |
| Rqcd1         | chr1:74506057-74530844    | 19.1812 | 19.2557 | 0.0056  | 0.979487 |
| Alyref2       | chr1:171503477-171504750  | 5.9021  | 5.8714  | -0.0075 | 0.992609 |
| Trp53bp2      | chr1:182409171-182462432  | 7.6246  | 7.7786  | 0.0288  | 0.889712 |
| Ctnna1        | chr18:35118887-35254773   | 18.1232 | 18.1917 | 0.0054  | 0.978671 |
| Cacfd1        | chr2:27009925-27021089    | 2.8981  | 2.9003  | 0.0011  | 0.992045 |
| Vav2          | chr2:27262103-27427033    | 11.2757 | 11.4701 | 0.0247  | 0.879275 |
| Myo3b         | chr2:70039125-70429198    | 3.1220  | 3.2549  | 0.0601  | 0.929942 |
| Pank2         | chr2:131262494-131299188  | 22.4157 | 22.8131 | 0.0254  | 0.863559 |
| Srms          | chr2:181205561-181213185  | 0.5927  | 0.5669  | -0.0642 | 0.957196 |
| Psmc4         | chr3:95032693-95042614    | 50.4267 | 51.2983 | 0.0247  | 0.919762 |
| Kdm4c         | chr4:74242496-74405860    | 16.9804 | 17.0350 | 0.0046  | 0.982529 |

|               |                           |         |         |         |          |
|---------------|---------------------------|---------|---------|---------|----------|
| Mmachc        | chr4:116702278-116708406  | 3.4044  | 3.5129  | 0.0453  | 0.910846 |
| Mrps15        | chr4:126046924-126055532  | 28.1067 | 28.1550 | 0.0025  | 0.993050 |
| Trmt112-ps2   | chr4:149457296-149457872  | 1.4036  | 1.4759  | 0.0725  | 0.934534 |
| Entpd7        | chr19:43689671-43733697   | 1.0934  | 1.1371  | 0.0565  | 0.932878 |
| Slc4a10       | chr2:62046461-62326730    | 0.2525  | 0.2674  | 0.0826  | 0.937151 |
| Gm15346       | chr8:22686264-22695646    | 1.2046  | 1.2984  | 0.1082  | 0.933493 |
| Dbnl          | chr11:5788487-5800962     | 77.1463 | 77.5771 | 0.0080  | 0.968411 |
| Nudt7         | chr8:114133556-114152312  | 5.3903  | 5.5355  | 0.0384  | 0.928624 |
| Tsnax         | chr8:125012996-125034192  | 31.4246 | 31.9625 | 0.0245  | 0.909398 |
| Acta2         | chr19:34241089-34255336   | 0.9612  | 0.9342  | -0.0410 | 0.959131 |
| Cnppd1        | chr1:75134553-75142368    | 31.3891 | 31.5685 | 0.0082  | 0.949660 |
| Setbp1        | chr18:78750379-79109391   | 1.2497  | 1.2470  | -0.0031 | 0.995417 |
| Slc16a3       | chr11:120948479-120960868 | 5.9773  | 6.1231  | 0.0348  | 0.954106 |
| Ahi1          | chr10:20952546-21080428   | 10.1296 | 10.3156 | 0.0263  | 0.843800 |
| 2810002D19Rik | chr2:94406150-94411682    | 7.4969  | 7.6519  | 0.0295  | 0.942593 |
| Rgs9bp        | chr7:35578997-35585582    | 0.1090  | 0.1047  | -0.0583 | 0.954919 |
| Fam151b       | chr13:92449621-92484031   | 2.4072  | 2.3751  | -0.0194 | 0.969934 |
| Slc22a17      | chr14:54906726-54913132   | 0.7344  | 0.7680  | 0.0645  | 0.917973 |
| Ssx2ip        | chr3:146404641-146440139  | 3.1313  | 3.1957  | 0.0294  | 0.928768 |
| P2ry1         | chr3:61002794-61008979    | 0.2034  | 0.1966  | -0.0490 | 0.970145 |
| Gm11748       | chr11:118476469-118479458 | 0.9976  | 1.0497  | 0.0735  | 0.927592 |
| Gm684         | chr9:51270257-51278554    | 0.8813  | 0.8560  | -0.0420 | 0.961089 |
| Rps7          | chr12:28630846-28635953   | 8.5024  | 8.4504  | -0.0089 | 0.984194 |
| Ston1         | chr17:88597683-88662586   | 0.3555  | 0.3745  | 0.0751  | 0.927265 |
| Cracr2a       | chr6:127577974-127629938  | 12.6765 | 12.6548 | -0.0025 | 0.995921 |
| Pthr1         | chr2:32775785-32777597    | 2.5785  | 2.5391  | -0.0223 | 0.972859 |
| Zbtb10        | chr3:9250601-9285333      | 1.7561  | 1.7550  | -0.0009 | 0.997702 |
| Xbp1          | chr11:5520658-5525893     | 35.8298 | 36.0608 | 0.0093  | 0.860610 |
| Spred2        | chr11:19924374-20024026   | 2.3231  | 2.3807  | 0.0353  | 0.942063 |
| Zbed5         | chr5:129895722-129903623  | 2.4165  | 2.4953  | 0.0463  | 0.945371 |
| Zfp790        | chr7:29816071-29832042    | 9.6614  | 9.8282  | 0.0247  | 0.885379 |
| Haus5         | chr7:30653710-30664994    | 5.6976  | 5.8053  | 0.0270  | 0.896295 |
| Rpusd4        | chr9:35267864-35277731    | 12.7641 | 12.7616 | -0.0003 | 0.999098 |
| Gm7707        | chr14:32266592-32267748   | 2.7180  | 2.6845  | -0.0179 | 0.974202 |
| 9930012K11Rik | chr14:70154404-70159502   | 3.8719  | 3.9577  | 0.0316  | 0.921438 |
| Plcl2         | chr17:50509546-50688493   | 41.0049 | 41.3000 | 0.1003  | 0.923640 |
| Acbd6         | chr1:155558119-155687233  | 12.1902 | 12.4372 | 0.0289  | 0.912927 |
| Ii27          | chr7:126589009-126594941  | 0.9249  | 0.8833  | -0.0663 | 0.959598 |
| Skp2          | chr15:9111984-9140451     | 2.3517  | 2.3986  | 0.0285  | 0.888350 |
| NA            | chr10:5020202-5069063     | 13.7238 | 13.9382 | 0.0224  | 0.895269 |
| Aim1          | chr10:43950306-44004846   | 22.3056 | 22.6483 | 0.0220  | 0.752198 |
| BC005537      | chr13:24801656-24814013   | 65.9701 | 67.0497 | 0.0234  | 0.885912 |
| Prkab1        | chr5:116013585-116024508  | 19.1277 | 19.4751 | 0.0260  | 0.905281 |
| Gm7457        | chr6:142814230-142833494  | 0.4547  | 0.4413  | -0.0431 | 0.958202 |
| Supt5         | chr7:28314897-28338719    | 55.3961 | 55.7976 | 0.0104  | 0.905693 |
| Car11         | chr7:45699842-45704682    | 0.9122  | 0.8970  | -0.0242 | 0.956640 |
| Man2a2        | chr7:80349097-80371375    | 15.6427 | 15.9057 | 0.0241  | 0.899926 |
| Gcdh          | chr8:84886392-84893921    | 11.4421 | 11.6692 | 0.0283  | 0.877579 |
| Gpr18         | chr14:121911434-121915774 | 41.1426 | 41.3727 | 0.0080  | 0.961296 |
| Supt3         | chr17:44777151-45119290   | 3.5297  | 3.6185  | 0.0358  | 0.928661 |
| Gm9974        | chr16:17081998-17082691   | 3.7266  | 3.6631  | -0.0248 | 0.971145 |
| Gnaq          | chr19:16132830-16387463   | 4.1546  | 4.2257  | 0.0245  | 0.906541 |
| Arhgap21      | chr2:20847918-20968881    | 1.9573  | 1.9584  | 0.0008  | 0.998025 |
| Pdss1         | chr2:22895521-22940266    | 4.8336  | 4.8344  | 0.0002  | 0.999587 |
| Traf2         | chr2:25517981-25546940    | 18.4683 | 18.5753 | 0.0083  | 0.957215 |
| Sec16a        | chr2:26409430-26445216    | 24.1936 | 24.5631 | 0.0219  | 0.825237 |
| Eli3          | chr2:121439009-121444278  | 0.8369  | 0.8163  | -0.0358 | 0.967439 |
| Fam110a       | chr2:151969397-151980219  | 5.6454  | 5.6212  | -0.0062 | 0.990009 |
| Csnk2a1       | chr2:152226838-152281852  | 21.3678 | 21.7171 | 0.0234  | 0.898434 |
| Tusc1         | chr4:93334147-93335511    | 0.7278  | 0.7617  | 0.0657  | 0.930914 |
| Prkag2os1     | chr5:24902568-24906850    | 1.3861  | 1.3613  | -0.0260 | 0.982608 |
| Gm13689       | chr2:80549711-80550396    | 0.8773  | 0.9424  | 0.1032  | 0.941731 |
| Timm13        | chr10:80899449-80900969   | 27.3021 | 27.8472 | 0.0285  | 0.915640 |
| B630005N14Rik | chr6:13625676-13677966    | 16.3268 | 16.6028 | 0.0242  | 0.865468 |
| Fam213a       | chr14:40993739-41013788   | 2.3719  | 2.3465  | -0.0155 | 0.978215 |
| Gm15527       | chr6:54245741-54279076    | 0.2827  | 0.2767  | -0.0311 | 0.970044 |
| Sik2          | chr9:50892800-51009073    | 5.1126  | 5.1307  | 0.0051  | 0.981872 |
| Rmnd1         | chr10:4401914-4432388     | 4.9550  | 4.9921  | 0.0108  | 0.964814 |
| Map7          | chr10:20148470-20281589   | 5.1936  | 5.2192  | 0.0071  | 0.985651 |
| Bclaf1        | chr10:20312468-20342501   | 94.9111 | 96.1608 | 0.0189  | 0.882936 |
| Herc4         | chr10:63243796-63317881   | 45.3965 | 45.7358 | 0.0107  | 0.934536 |

|               |                           |          |          |         |          |
|---------------|---------------------------|----------|----------|---------|----------|
| lpmk          | chr10:71347762-71433327   | 5.5581   | 5.6512   | 0.0240  | 0.866860 |
| Prmt2         | chr10:76207221-76237865   | 5.2780   | 5.3586   | 0.0219  | 0.949377 |
| Ilvbl         | chr10:78574499-78584498   | 17.4695  | 17.7521  | 0.0231  | 0.887232 |
| 2610008E11Rik | chr10:79064373-79097600   | 13.9068  | 14.0990  | 0.0198  | 0.889896 |
| Sbno2         | chr10:80057415-80102698   | 22.4947  | 22.6681  | 0.0111  | 0.972052 |
| Stk11         | chr10:80115802-80130682   | 19.3441  | 19.5057  | 0.0120  | 0.908516 |
| Apba3         | chr10:81268171-81273246   | 16.0245  | 16.2645  | 0.0214  | 0.932302 |
| Fhl4          | chr10:85097018-85102495   | 0.6297   | 0.6521   | 0.0505  | 0.952756 |
| Lta4h         | chr10:93453395-93484896   | 75.4848  | 76.5376  | 0.0200  | 0.917704 |
| Socs2         | chr10:95385361-95417180   | 4.7906   | 4.8774   | 0.0259  | 0.916828 |
| Irak3         | chr10:120141647-120202130 | 0.8702   | 0.8688   | -0.0022 | 0.996378 |
| Gm16166       | chr10:120928185-120928972 | 0.9375   | 0.9741   | 0.0553  | 0.958936 |
| Tbc1d30       | chr10:121263823-121311189 | 10.1676  | 10.2195  | 0.0073  | 0.967013 |
| Cs            | chr10:128337831-128362479 | 80.3201  | 81.4659  | 0.0204  | 0.822267 |
| Drg1          | chr11:3187359-3266415     | 28.0893  | 28.2799  | 0.0098  | 0.948960 |
| Trim7         | chr11:48826139-48852209   | 0.4167   | 0.4276   | 0.0373  | 0.950191 |
| D930048N14Rik | chr11:51650953-51657681   | 0.6110   | 0.6273   | 0.0379  | 0.941872 |
| Nt5m          | chr11:59839446-59880968   | 3.6893   | 3.7667   | 0.0299  | 0.951226 |
| Rangrf        | chr11:68972483-68975185   | 2.4533   | 2.5218   | 0.0398  | 0.917682 |
| Naa38         | chr11:69395486-69396680   | 22.7623  | 22.8543  | 0.0058  | 0.986504 |
| Eif4a1        | chr11:69666935-69672423   | 31.9885  | 32.1859  | 0.0089  | 0.966623 |
| Gps2          | chr11:69913887-69916591   | 36.5805  | 37.1247  | 0.0213  | 0.911834 |
| Rnasek        | chr11:70238123-70239842   | 12.8339  | 13.0563  | 0.0248  | 0.959121 |
| Rpain         | chr11:70970212-70977833   | 8.4654   | 8.5346   | 0.0118  | 0.958380 |
| Myo1c         | chr11:75650503-75673910   | 13.0942  | 13.1705  | 0.0084  | 0.974448 |
| Ksr1          | chr11:79013439-79146407   | 10.0398  | 10.1048  | 0.0093  | 0.974827 |
| Nle1          | chr11:82900767-82908411   | 7.5006   | 7.5348   | 0.0066  | 0.975328 |
| Phb           | chr11:95666956-95680773   | 7.5136   | 7.6356   | 0.0232  | 0.849663 |
| Cacnb1        | chr11:98001507-98023034   | 3.7882   | 3.8510   | 0.0237  | 0.933135 |
| Thra          | chr11:98740637-98769006   | 2.2857   | 2.2860   | 0.0002  | 0.999255 |
| Milr1         | chr11:106751225-106768794 | 5.4379   | 5.4633   | 0.0067  | 0.984167 |
| Endov         | chr11:119491346-119511437 | 4.4004   | 4.4232   | 0.0074  | 0.976278 |
| 1110002L01Rik | chr12:3403877-3427011     | 6.0818   | 6.1711   | 0.0210  | 0.920907 |
| Itgb1bp1      | chr12:21240824-21286237   | 12.8021  | 12.8832  | 0.0091  | 0.947204 |
| Gdap10        | chr12:32821871-32826904   | 6.8528   | 6.9560   | 0.0216  | 0.932947 |
| Hdac9         | chr12:34371502-34528889   | 1.4672   | 1.4942   | 0.0263  | 0.961595 |
| NA            | chr12:55239325-55263020   | 6.6855   | 6.7368   | 0.0110  | 0.949194 |
| Pcnx14        | chr12:72536356-72580213   | 1.5132   | 1.5552   | 0.0395  | 0.945332 |
| 2410016O06Rik | chr12:83950607-83952953   | 15.3885  | 15.6394  | 0.0233  | 0.918609 |
| Mark3         | chr12:111574509-111656227 | 42.0773  | 42.6021  | 0.0179  | 0.856799 |
| Bag5          | chr12:111709487-111713257 | 11.3084  | 11.5243  | 0.0273  | 0.904833 |
| Wdr60         | chr12:116207049-116263025 | 0.7473   | 0.7378   | -0.0184 | 0.976832 |
| 4930586N03Rik | chr13:23313524-23385799   | 2.0704   | 2.0548   | -0.0109 | 0.988233 |
| Gm11361       | chr13:28257635-28258094   | 3.1860   | 3.2919   | 0.0472  | 0.944460 |
| Serpinc6b     | chr13:32965208-32979067   | 15.3248  | 15.5833  | 0.0241  | 0.931432 |
| Mir23b        | chr13:63300471-63300568   | 15.4036  | 14.9939  | -0.0389 | 0.960583 |
| Mier3         | chr13:111686177-111718596 | 10.2521  | 10.3254  | 0.0103  | 0.946940 |
| Mrps30        | chr13:118380109-118387252 | 29.2250  | 29.7121  | 0.0238  | 0.922788 |
| Mterf1b       | chr5:4192366-4197651      | 3.1660   | 3.1725   | 0.0030  | 0.993438 |
| Clock         | chr5:76212176-76304548    | 8.8513   | 8.9755   | 0.0201  | 0.739423 |
| Ythdc1        | chr5:86804220-86836659    | 32.6580  | 32.9258  | 0.0118  | 0.874126 |
| Enoph1        | chr5:100039993-100068762  | 12.5563  | 12.7817  | 0.0257  | 0.924261 |
| Tfip11        | chr5:112326357-112338073  | 13.5915  | 13.7942  | 0.0214  | 0.870300 |
| Brap          | chr5:121660562-121687248  | 23.6676  | 23.8579  | 0.0116  | 0.901212 |
| lft81         | chr5:122550203-122614518  | 1.3425   | 1.3899   | 0.0500  | 0.949216 |
| Bcl7a         | chr5:123343833-123374082  | 2.4532   | 2.4980   | 0.0261  | 0.921148 |
| Dnah10        | chr5:124725084-124834308  | 0.0664   | 0.0644   | -0.0435 | 0.974435 |
| Mkln1         | chr6:31398734-31516811    | 7.9931   | 8.1061   | 0.0202  | 0.807765 |
| Akr1b10       | chr6:34384217-34396950    | 7.5135   | 7.6489   | 0.0258  | 0.924945 |
| Nup205        | chr6:35177429-35247590    | 33.7939  | 34.2300  | 0.0185  | 0.895064 |
| Klrg2         | chr6:38626659-38637239    | 0.3240   | 0.3416   | 0.0765  | 0.941695 |
| Mkrn1         | chr6:39397803-39420462    | 24.8403  | 25.0474  | 0.0120  | 0.939442 |
| Trbv15        | chr6:41141210-41141658    | 121.2676 | 122.0529 | 0.0093  | 0.961214 |
| Retsat        | chr6:72598474-72608425    | 2.5868   | 2.5910   | 0.0023  | 0.995354 |
| Tia1          | chr6:86404218-86433403    | 11.1780  | 11.3310  | 0.0196  | 0.907475 |
| Arhgap25      | chr6:87458544-87533259    | 47.5758  | 48.1909  | 0.0185  | 0.842009 |
| Lsm3          | chr6:91515927-91522625    | 35.3483  | 35.8840  | 0.0217  | 0.907708 |
| Edem1         | chr6:108828640-108859356  | 50.1100  | 50.5199  | 0.0118  | 0.779705 |
| March8        | chr6:116338023-116409540  | 0.3371   | 0.3473   | 0.0429  | 0.966946 |
| Gm15856       | chr6:121223691-121226153  | 1.2222   | 1.2090   | -0.0157 | 0.985214 |
| Rad51ap1      | chr6:126923049-126939587  | 5.1775   | 5.2588   | 0.0225  | 0.942969 |

|                |                           |          |          |         |          |
|----------------|---------------------------|----------|----------|---------|----------|
| Cmas           | chr6:142756685-142775714  | 25.2761  | 25.6990  | 0.0239  | 0.873844 |
| Zfp583         | chr7:6315659-6331285      | 0.8246   | 0.8457   | 0.0366  | 0.948004 |
| Gm17907        | chr7:55902601-55903311    | 1.0973   | 1.1438   | 0.0598  | 0.956017 |
| Zscan2         | chr7:80860919-80876516    | 10.4168  | 10.4772  | 0.0083  | 0.972204 |
| Ctsc           | chr7:88278084-88310888    | 19.1290  | 19.3583  | 0.0172  | 0.900025 |
| Prcp           | chr7:92875252-92934573    | 4.7409   | 4.7699   | 0.0088  | 0.973592 |
| Clns1a         | chr7:97696633-97718879    | 46.2289  | 46.4320  | 0.0063  | 0.979221 |
| Dnajb13        | chr7:100503017-100514960  | 7.1252   | 7.1752   | 0.0101  | 0.944105 |
| Taldo1         | chr7:141392198-141402968  | 65.1428  | 66.1169  | 0.0214  | 0.908728 |
| Snora52        | chr7:141448802-141448939  | 28.0554  | 27.9785  | -0.0040 | 0.994291 |
| Dctn6          | chr8:34090419-34108796    | 20.8306  | 20.9418  | 0.0077  | 0.920647 |
| Cenpu          | chr8:46552054-46580007    | 7.7378   | 7.8569   | 0.0220  | 0.922839 |
| Cbr4           | chr8:61487733-61503482    | 3.9966   | 4.0206   | 0.0086  | 0.962036 |
| Rfxank         | chr8:70130811-70139197    | 12.2717  | 12.4365  | 0.0192  | 0.904782 |
| Use1           | chr8:71366847-71369732    | 38.2761  | 38.5466  | 0.0102  | 0.960017 |
| 0610038B21Rik  | chr8:77518114-77523898    | 2.1968   | 2.2569   | 0.0389  | 0.937263 |
| Z310036O22Rik  | chr8:85026832-85030285    | 145.9375 | 146.8982 | 0.0095  | 0.950663 |
| Txn14b         | chr8:109565891-109574051  | 5.2534   | 5.3668   | 0.0308  | 0.925985 |
| Dbndd1         | chr8:123504717-123515463  | 1.5261   | 1.5178   | -0.0079 | 0.990704 |
| Swsap1         | chr9:21955752-21958270    | 4.7544   | 4.7584   | 0.0012  | 0.995297 |
| Gm26737        | chr9:44112922-44121947    | 0.5935   | 0.6163   | 0.0542  | 0.940239 |
| Rdx            | chr9:52047149-52088737    | 65.7540  | 66.2946  | 0.0118  | 0.920478 |
| Rcn2           | chr9:56041844-56061882    | 8.3533   | 8.4783   | 0.0214  | 0.909128 |
| Mtfmt          | chr9:65435781-65453054    | 5.4323   | 5.4555   | 0.0061  | 0.977864 |
| Gtf2a2         | chr9:70012549-70022866    | 17.0217  | 17.1541  | 0.0112  | 0.945951 |
| Fam63b         | chr9:70599013-70657174    | 24.2643  | 24.4556  | 0.0113  | 0.936562 |
| Nck1           | chr9:100492292-100546053  | 11.4949  | 11.5833  | 0.0111  | 0.965619 |
| Snora62        | chr9:120130414-120130563  | 6.8177   | 7.0048   | 0.0391  | 0.947957 |
| 9530027J09Rik  | chrX:48276791-48285426    | 14.4670  | 14.5378  | 0.0070  | 0.968952 |
| Atp11c         | chrX:60223289-60592698    | 13.8734  | 14.0688  | 0.0202  | 0.874026 |
| Zfx            | chrX:94074630-94123702    | 13.6660  | 13.8389  | 0.0181  | 0.916063 |
| F630028O10Rik  | chrX:96239941-96243636    | 0.3366   | 0.3478   | 0.0474  | 0.972923 |
| Gm5763         | chrX:142631482-142634015  | 0.3920   | 0.4112   | 0.0691  | 0.960115 |
| Rragb          | chrX:153139980-153171943  | 5.1419   | 5.2452   | 0.0287  | 0.943428 |
| Zfp622         | chr15:25984365-25998482   | 25.7549  | 26.1292  | 0.0208  | 0.932498 |
| Eif3e          | chr15:43250039-43282736   | 139.5649 | 141.3905 | 0.0187  | 0.943050 |
| Pkhd1l1        | chr15:44457552-44597143   | 0.4868   | 0.4972   | 0.0305  | 0.948894 |
| Lynx1          | chr15:74747855-74752979   | 0.9726   | 0.9913   | 0.0274  | 0.944621 |
| Apol7e         | chr15:77698888-77719288   | 6.5677   | 6.7210   | 0.0333  | 0.899183 |
| Sun2           | chr15:79724069-79742536   | 92.4933  | 93.1567  | 0.0103  | 0.942068 |
| Atxn10         | chr15:85336380-85463836   | 33.9544  | 34.4439  | 0.0206  | 0.911000 |
| Lmf2           | chr15:89351003-89355659   | 12.0171  | 12.0941  | 0.0092  | 0.978793 |
| Slc4a8         | chr15:100761746-100823968 | 2.1774   | 2.1876   | 0.0068  | 0.959863 |
| Ube2e1         | chr14:18282721-18331859   | 7.7463   | 7.8891   | 0.0264  | 0.928265 |
| Asb14          | chr14:26894556-26915258   | 0.5088   | 0.5239   | 0.0421  | 0.964774 |
| App1           | chr14:26918987-26971232   | 12.8661  | 12.9664  | 0.0112  | 0.941307 |
| Chdh           | chr14:30009022-30040466   | 2.6230   | 2.6639   | 0.0223  | 0.954480 |
| Wapal          | chr14:34673927-34747983   | 63.2761  | 64.1600  | 0.0200  | 0.900010 |
| Trav13-1       | chr14:53545013-53545521   | 7.8992   | 7.8593   | -0.0073 | 0.991735 |
| Trav12-3       | chr14:53621656-53622243   | 5.9040   | 6.0325   | 0.0311  | 0.961015 |
| Trav15-2-dv6-2 | chr14:53649386-53649993   | 1.8940   | 1.9557   | 0.0462  | 0.958773 |
| Trdv1          | chr14:53881531-53882216   | 2.2580   | 2.2446   | -0.0086 | 0.992239 |
| Traj3          | chr14:54217291-54217357   | 100.1413 | 102.5764 | 0.0347  | 0.959868 |
| Zmym2          | chr14:56887794-56962579   | 30.4375  | 30.6385  | 0.0095  | 0.956411 |
| Gm16259        | chr14:105292431-105292984 | 2.0225   | 2.0773   | 0.0386  | 0.946504 |
| Dnajc3         | chr14:118937931-118981702 | 50.2783  | 50.7084  | 0.0123  | 0.887377 |
| BC002059       | chr17:16972909-16973770   | 21.4373  | 21.7825  | 0.0230  | 0.821116 |
| Zfp54          | chr17:21423226-21435640   | 7.0678   | 7.2245   | 0.0316  | 0.930182 |
| Tmem8          | chr17:26113315-26123254   | 7.8430   | 7.8762   | 0.0061  | 0.987190 |
| Phf1           | chr17:26933126-26937890   | 29.1978  | 29.4563  | 0.0127  | 0.961146 |
| U2af1          | chr17:31647081-31658754   | 29.9359  | 30.1080  | 0.0083  | 0.960458 |
| Gm26549        | chr17:32284786-32298689   | 4.8238   | 4.8218   | -0.0006 | 0.998935 |
| Cyp4f13        | chr17:32924687-32947402   | 4.9294   | 5.0261   | 0.0280  | 0.913776 |
| Zfp472         | chr17:32965813-32979233   | 12.4634  | 12.6386  | 0.0201  | 0.932650 |
| Zfp101         | chr17:33360506-33394641   | 4.8788   | 4.9050   | 0.0077  | 0.975567 |
| Tap2           | chr17:34203526-34216321   | 66.7078  | 67.7229  | 0.0218  | 0.879839 |
| Gm20460        | chr17:34614483-34627349   | 4.9172   | 5.0141   | 0.0281  | 0.941742 |
| Prr3           | chr17:35972540-35980236   | 4.0199   | 4.0835   | 0.0226  | 0.758004 |
| Tjap1          | chr17:46257850-46283026   | 6.8552   | 6.9560   | 0.0211  | 0.937631 |
| D17Wsu104e     | chr17:56175743-56183920   | 16.9765  | 17.0813  | 0.0089  | 0.964214 |
| C030034I22Rik  | chr17:69417460-69418931   | 5.3017   | 5.3104   | 0.0023  | 0.990824 |

|               |                          |          |          |         |          |
|---------------|--------------------------|----------|----------|---------|----------|
| Gemin6        | chr17:80224440-80228497  | 4.2404   | 4.3327   | 0.0311  | 0.947802 |
| Nmral1        | chr16:4710058-4719356    | 6.6821   | 6.7802   | 0.0210  | 0.936045 |
| Zc3h7a        | chr16:11136591-11176393  | 34.4420  | 34.7529  | 0.0130  | 0.904668 |
| Pdxdc1        | chr16:13833147-13903131  | 15.7368  | 15.9446  | 0.0189  | 0.807141 |
| Mcm4          | chr16:15623896-15637400  | 56.2773  | 56.7505  | 0.0121  | 0.892196 |
| Mapk1         | chr16:16983381-17047453  | 41.2618  | 41.8400  | 0.0201  | 0.766600 |
| Gm15954       | chr16:18069213-18070362  | 2.7602   | 2.7203   | -0.0210 | 0.929078 |
| Xxylt1        | chr16:30955626-31081432  | 9.4035   | 9.5471   | 0.0219  | 0.875585 |
| Tfg           | chr16:56690331-56717450  | 18.5537  | 18.8352  | 0.0217  | 0.846632 |
| Ndufv1        | chr19:4007496-4012806    | 33.2962  | 33.7708  | 0.0204  | 0.874612 |
| Pitpnm1       | chr19:4099997-4113965    | 39.0609  | 39.3747  | 0.0115  | 0.958201 |
| Frdm8os       | chr19:5848507-5851372    | 35.3739  | 36.0327  | 0.0266  | 0.917008 |
| Polr2g        | chr19:8793128-8798557    | 52.4488  | 53.3318  | 0.0241  | 0.901132 |
| Asrgl1        | chr19:9109867-9135636    | 7.5333   | 7.5820   | 0.0093  | 0.915830 |
| Fxn           | chr19:24261452-24280605  | 4.7330   | 4.7450   | 0.0036  | 0.990018 |
| Cdc37l1       | chr19:28990493-29017569  | 32.4978  | 32.9827  | 0.0214  | 0.801361 |
| Ins16         | chr19:29321343-29325356  | 8.5199   | 8.5463   | 0.0045  | 0.984058 |
| 2010300C02Rik | chr1:37611676-37720085   | 0.4568   | 0.4718   | 0.0467  | 0.963138 |
| Mettl21c      | chr1:44009407-44020034   | 1.4619   | 1.4636   | 0.0016  | 0.996519 |
| Gls           | chr1:52163447-52233232   | 30.3566  | 30.7901  | 0.0205  | 0.889410 |
| Gm24053       | chr1:54769217-54769322   | 10.7739  | 11.1048  | 0.0437  | 0.965142 |
| Sf3b1         | chr1:54985168-55027478   | 265.0625 | 268.2529 | 0.0173  | 0.867621 |
| Tyw5          | chr1:57388236-57407101   | 6.6821   | 6.8075   | 0.0268  | 0.929759 |
| Dock10        | chr1:80501072-80758553   | 125.6758 | 127.3921 | 0.0196  | 0.830450 |
| Hdlbp         | chr1:93405939-93478808   | 32.4285  | 32.9186  | 0.0216  | 0.864347 |
| Gm3531        | chr1:97948900-97949389   | 9.4509   | 9.6652   | 0.0323  | 0.923429 |
| Tsn           | chr1:118298516-118311132 | 44.5140  | 45.0790  | 0.0182  | 0.896810 |
| Slc35f5       | chr1:125561015-125595684 | 1.1224   | 1.1542   | 0.0403  | 0.955389 |
| E330020D12Rik | chr1:153404826-153408429 | 1.0239   | 1.0442   | 0.0283  | 0.971014 |
| Cacna1e       | chr1:154392518-154725920 | 0.0641   | 0.0595   | -0.1066 | 0.956687 |
| Gm23212       | chr1:161036681-161036741 | 307.6713 | 309.4290 | 0.0082  | 0.984296 |
| Ifi203        | chr1:173920406-173942672 | 36.6994  | 37.2203  | 0.0203  | 0.928950 |
| Sde2          | chr1:180851150-180868097 | 15.0568  | 15.1607  | 0.0099  | 0.968364 |
| Polr2d        | chr18:31789158-31796642  | 19.2083  | 19.2867  | 0.0059  | 0.986005 |
| Gm5239        | chr18:35536582-35536951  | 16.6863  | 17.2800  | 0.0504  | 0.937370 |
| Sra1          | chr18:36666680-36671196  | 21.4658  | 21.7572  | 0.0195  | 0.830735 |
| Napg          | chr18:62977835-62999450  | 12.2191  | 12.4075  | 0.0221  | 0.793254 |
| Rpp38         | chr2:3328948-3332643     | 10.0416  | 10.2822  | 0.0342  | 0.946196 |
| Mcm10         | chr2:4989713-5012791     | 4.3776   | 4.4337   | 0.0184  | 0.912360 |
| Gm13199       | chr2:5862079-5862934     | 8.4153   | 8.6310   | 0.0365  | 0.938050 |
| Dnajc1        | chr2:18195653-18392830   | 13.2163  | 13.3287  | 0.0122  | 0.849567 |
| Nsmf          | chr2:25054354-25062881   | 7.5867   | 7.6128   | 0.0050  | 0.985330 |
| Qsox2         | chr2:26208636-26237525   | 3.9524   | 4.0243   | 0.0260  | 0.900787 |
| Pip5k1l       | chr2:32574796-32583782   | 0.3071   | 0.3201   | 0.0597  | 0.954510 |
| Gsn           | chr2:35279662-35307892   | 13.7458  | 13.9362  | 0.0198  | 0.898409 |
| Sp3           | chr2:72936426-72980446   | 93.5889  | 94.3066  | 0.0110  | 0.913085 |
| Prdm11        | chr2:92965150-93046167   | 1.1486   | 1.1691   | 0.0255  | 0.950005 |
| Ivd           | chr2:118861953-118882909 | 8.1895   | 8.3272   | 0.0241  | 0.891413 |
| Ganc          | chr2:120403895-120461700 | 5.4945   | 5.5816   | 0.0227  | 0.886406 |
| Ap4e1         | chr2:127008716-127067909 | 5.6163   | 5.6937   | 0.0197  | 0.915115 |
| Acox1         | chr2:127838875-128123873 | 0.3862   | 0.3983   | 0.0444  | 0.951977 |
| Samhd1        | chr2:157097532-157135265 | 81.2595  | 82.5156  | 0.0221  | 0.877013 |
| Src           | chr2:157418443-157471862 | 3.6419   | 3.7207   | 0.0309  | 0.941155 |
| Oser1         | chr2:163405821-163424697 | 2.4982   | 2.4999   | 0.0009  | 0.995713 |
| Prex1         | chr2:166566341-166713832 | 25.2513  | 25.4540  | 0.0115  | 0.959992 |
| Snord12       | chr2:167065275-167065365 | 40.6250  | 41.6864  | 0.0372  | 0.941602 |
| Prpf6         | chr2:181591867-181655660 | 31.1312  | 31.3827  | 0.0116  | 0.891918 |
| Alg5          | chr3:54735538-54751127   | 8.7036   | 8.8348   | 0.0216  | 0.856210 |
| Slc25a44      | chr3:88410497-88425139   | 12.7499  | 12.8083  | 0.0066  | 0.946620 |
| Pygo2         | chr3:89430213-89435128   | 16.7886  | 16.8876  | 0.0085  | 0.950965 |
| Arnt          | chr3:95434387-95497240   | 7.6288   | 7.6789   | 0.0094  | 0.928248 |
| Prmt6         | chr3:110246111-110250998 | 12.6696  | 12.8562  | 0.0211  | 0.924236 |
| Rnpc3         | chr3:113605066-113630149 | 13.1429  | 13.3585  | 0.0235  | 0.868766 |
| Camk2d        | chr3:126596301-126844913 | 11.6362  | 11.7984  | 0.0200  | 0.861088 |
| Fam73a        | chr3:152273458-152340407 | 2.8822   | 2.8821   | -0.0001 | 0.999876 |
| Toposros      | chr4:40269568-40270940   | 13.2210  | 13.4551  | 0.0253  | 0.936487 |
| Il11ra1       | chr4:41699988-41769474   | 1.1349   | 1.1370   | 0.0027  | 0.995831 |
| Galt          | chr4:41755227-41758695   | 12.6413  | 12.8140  | 0.0196  | 0.871769 |
| Psip1         | chr4:83455679-83486459   | 57.0510  | 57.4389  | 0.0098  | 0.952510 |
| Efcab7        | chr4:99829197-99912788   | 1.6794   | 1.7233   | 0.0372  | 0.949433 |
| Mknk1         | chr4:115839197-115879250 | 8.6243   | 8.6760   | 0.0086  | 0.970062 |



|           |                           |         |         |         |          |
|-----------|---------------------------|---------|---------|---------|----------|
| Slc6a9    | chr4:117834505-117875198  | 0.1176  | 0.1126  | -0.0639 | 0.953565 |
| Mfsd2a    | chr4:122946849-122961188  | 4.5424  | 4.5582  | 0.0050  | 0.982433 |
| Cdca8     | chr4:124918464-124939311  | 5.4199  | 5.5217  | 0.0269  | 0.945041 |
| Snhg12    | chr4:132308677-132311024  | 27.2980 | 27.4363 | 0.0073  | 0.983029 |
| Rps6ka1   | chr4:133847289-133887797  | 77.8175 | 78.5035 | 0.0127  | 0.887886 |
| Tceb3     | chr4:136003367-136021763  | 33.0898 | 33.3487 | 0.0112  | 0.902692 |
| Pramef8   | chr4:143412425-143421091  | 14.2193 | 14.2969 | 0.0079  | 0.956081 |
| Ubiad1    | chr4:148434494-148444771  | 7.5974  | 7.6431  | 0.0086  | 0.963586 |
| Gm13204   | chr4:148569055-148569876  | 8.3545  | 8.5968  | 0.0412  | 0.939662 |
| Kif1b     | chr4:149176318-149307693  | 7.3838  | 7.4841  | 0.0195  | 0.908022 |
| Nadk      | chr4:155562377-155591001  | 39.2129 | 39.4957 | 0.0104  | 0.944406 |
| Cdk19os   | chr10:40348507-40350103   | 1.0777  | 1.1265  | 0.0638  | 0.943513 |
| Gm6419    | chr10:74862987-74863419   | 2.7988  | 2.7380  | -0.0317 | 0.972424 |
| Gm11960   | chr11:4561779-4564637     | 0.5288  | 0.5500  | 0.0569  | 0.941215 |
| Leap2     | chr11:53422180-53423170   | 2.3505  | 2.3355  | -0.0093 | 0.991906 |
| Map2k3os  | chr11:60920916-60931867   | 0.9511  | 0.9474  | -0.0056 | 0.989276 |
| Gm12275   | chr11:62304863-62305170   | 2.0171  | 1.9567  | -0.0439 | 0.975785 |
| Gm22988   | chr11:69669634-69669778   | 20.7518 | 20.5232 | -0.0160 | 0.984911 |
| Alox12    | chr11:70241456-70255353   | 0.5306  | 0.5458  | 0.0408  | 0.966629 |
| Adam6b    | chr12:113489544-113492018 | 0.5424  | 0.5400  | -0.0063 | 0.994602 |
| Mef2c     | chr13:83504033-83667079   | 0.2543  | 0.2529  | -0.0080 | 0.993809 |
| Gm15846   | chr5:122438595-122438915  | 2.4783  | 2.5980  | 0.0681  | 0.931025 |
| Gm22486   | chr6:71882556-71882693    | 29.4049 | 31.1407 | 0.0827  | 0.942455 |
| Prtr3     | chr6:113494094-113501818  | 0.7609  | 0.7854  | 0.0456  | 0.955625 |
| Gm15549   | chr8:68798866-68799488    | 1.4349  | 1.5067  | 0.0704  | 0.951235 |
| Large     | chr8:72814598-73353540    | 0.0868  | 0.0916  | 0.0787  | 0.951640 |
| Rps11-ps1 | chr9:59471758-59472233    | 4.1049  | 4.0550  | -0.0177 | 0.983038 |
| Gm14450   | chrX:5984771-5985011      | 3.7584  | 3.9331  | 0.0655  | 0.946221 |
| lph-ps2   | chrX:13217922-13218650    | 1.3493  | 1.4329  | 0.0867  | 0.951142 |
| Efnb1     | chrX:99136129-99148991    | 0.5662  | 0.5861  | 0.0499  | 0.951005 |
| Gm20717   | chr15:64098316-64100886   | 1.6454  | 1.6280  | -0.0153 | 0.987958 |
| Trav9-2   | chr14:53591079-53591514   | 7.5474  | 7.7846  | 0.0446  | 0.953951 |
| Gm10226   | chr17:21691859-21692114   | 8.4732  | 8.6926  | 0.0369  | 0.943585 |
| Kcnj15    | chr16:95257557-95300260   | 0.1942  | 0.2024  | 0.0592  | 0.953738 |
| Lbhd1     | chr19:8883929-8887258     | 1.4272  | 1.3862  | -0.0421 | 0.976584 |
| Gm14086   | chr2:122427193-122427469  | 21.1663 | 20.9431 | -0.0153 | 0.986985 |
| Gm23187   | chr2:130277194-130277280  | 24.6836 | 25.7412 | 0.0605  | 0.950849 |
| Lbp       | chr2:158306492-158332852  | 0.1283  | 0.1369  | 0.0935  | 0.950387 |
| Gm14303   | chr2:172509431-172509697  | 8.0110  | 8.3851  | 0.0659  | 0.948315 |
| Gm26869   | chr2:178023807-178028736  | 0.5188  | 0.5364  | 0.0481  | 0.960306 |
| Ak4       | chr4:101419276-101466995  | 0.3770  | 0.3739  | -0.0119 | 0.992964 |
| Sfn4      | chr11:83175185-83190221   | 0.7713  | 0.7695  | -0.0034 | 0.997916 |
| Gm26394   | chr11:98999507-98999622   | 7.2225  | 7.6645  | 0.0857  | 0.943596 |
| Atxn71os1 | chr12:33193993-33228854   | 0.9125  | 0.8971  | -0.0245 | 0.986129 |
| Siglecg   | chr7:43408203-43418358    | 0.1588  | 0.1539  | -0.0459 | 0.972535 |
| Ntf5      | chr7:45413694-45417178    | 0.3063  | 0.2979  | -0.0402 | 0.968835 |
| Tubb3     | chr8:123411423-123422015  | 0.3801  | 0.4014  | 0.0787  | 0.932268 |
| Dapk2     | chr9:66158222-66272242    | 0.4150  | 0.4352  | 0.0684  | 0.957926 |
| Gm15317   | chr16:96145475-96147584   | 1.2473  | 1.2260  | -0.0250 | 0.984761 |
| Gm22697   | chr18:42301889-42301952   | 11.5476 | 11.3689 | -0.0225 | 0.985448 |
| Gm13346   | chr2:19676710-19686157    | 0.1813  | 0.1776  | -0.0298 | 0.975681 |
| Gm13347   | chr2:19677250-19678603    | 0.4868  | 0.4769  | -0.0298 | 0.975681 |
| Efna4     | chr3:89333389-89338028    | 0.4054  | 0.3967  | -0.0312 | 0.974849 |
| Gm12607   | chr4:89161698-89162191    | 1.9501  | 2.0446  | 0.0683  | 0.959990 |
| Zswim5    | chr4:116877375-116989264  | 0.1710  | 0.1759  | 0.0411  | 0.962161 |
| Fndc5     | chr4:129136998-129144593  | 0.2722  | 0.2819  | 0.0506  | 0.972796 |
| Slc5a11   | chr7:123214779-123273253  | 0.2980  | 0.2920  | -0.0297 | 0.979191 |
| Pex11g    | chr8:3457104-3467680      | 3.6198  | 3.6760  | 0.0222  | 0.930544 |
| NA        | chr3:88738752-88739692    | 0.8345  | 0.8519  | 0.0299  | 0.981871 |
| Mttr4     | chr11:87592161-87616302   | 11.7581 | 11.8365 | 0.0096  | 0.966495 |
| Rock2     | chr12:16894977-16988274   | 19.8186 | 20.0544 | 0.0171  | 0.903358 |
| Odc1      | chr12:17544872-17551502   | 39.8793 | 40.1819 | 0.0109  | 0.959507 |
| Clip1     | chr5:123577794-123684618  | 18.1839 | 18.3552 | 0.0135  | 0.916515 |
| U2af114   | chr7:30563300-30567960    | 29.7691 | 30.1636 | 0.0190  | 0.811650 |
| Ist1      | chr8:109671321-109693294  | 55.1422 | 55.8644 | 0.0188  | 0.852336 |
| Pdzd2     | chr15:12357053-12592556   | 0.4632  | 0.4711  | 0.0245  | 0.957820 |
| Tenc1     | chr15:102102987-102116401 | 0.8572  | 0.8621  | 0.0082  | 0.993315 |
| Btg2      | chr1:134075169-134079120  | 98.2864 | 99.4533 | 0.0170  | 0.860491 |
| Iigp1     | chr18:60376028-60392627   | 86.8165 | 87.6408 | 0.0136  | 0.946185 |
| NA        | chr2:30237492-30238223    | 2.6958  | 2.7544  | 0.0310  | 0.967418 |
| Gm12353   | chr4:19605450-19651130    | 7.1567  | 7.2078  | 0.0103  | 0.987005 |

|               |                           |          |          |         |          |
|---------------|---------------------------|----------|----------|---------|----------|
| Mir7-1        | chr13:58392778-58392886   | 13.2467  | 13.2602  | 0.0015  | 0.999162 |
| Gm24366       | chr8:122471626-122471712  | 6.3958   | 6.6962   | 0.0662  | 0.944977 |
| Naalad2       | chr9:18321950-18402995    | 0.2144   | 0.2135   | -0.0056 | 0.996173 |
| Gm14680       | chrX:62775150-62776742    | 0.5612   | 0.5790   | 0.0450  | 0.962930 |
| Gm11439       | chr11:85095140-85095549   | 1.4417   | 1.4067   | -0.0354 | 0.978597 |
| St7l          | chr3:104864502-104926860  | 6.1144   | 6.1598   | 0.0107  | 0.970671 |
| Slc36a1       | chr11:55204349-55236330   | 4.0202   | 4.0751   | 0.0196  | 0.927503 |
| Ubxn4         | chr1:128244180-128279377  | 41.5974  | 41.9569  | 0.0124  | 0.880496 |
| Csnk1g3       | chr18:53862112-53955684   | 12.7366  | 12.9093  | 0.0194  | 0.828631 |
| Eif2a         | chr3:58525820-58557501    | 15.8652  | 15.9917  | 0.0115  | 0.959685 |
| Anxa3         | chr5:96793384-96845968    | 0.4921   | 0.4922   | 0.0004  | 0.999691 |
| Echdc1        | chr10:29313165-29346661   | 16.0401  | 16.1807  | 0.0126  | 0.960978 |
| Gm16365       | chr10:39558495-39613682   | 3.0564   | 3.0627   | 0.0030  | 0.995878 |
| Gm26860       | chr10:42761595-42763635   | 3.5096   | 3.5227   | 0.0054  | 0.993623 |
| Dos           | chr10:80130450-80140835   | 3.3250   | 3.3775   | 0.0226  | 0.938269 |
| Btbd2         | chr10:80642616-80657071   | 8.1653   | 8.2583   | 0.0164  | 0.908262 |
| Dram1         | chr10:88322803-88379080   | 0.6157   | 0.6236   | 0.0183  | 0.979583 |
| Gm25117       | chr10:111481492-111481636 | 41.9317  | 42.0235  | 0.0032  | 0.994721 |
| Myl6b         | chr10:128494156-128498685 | 3.6541   | 3.7002   | 0.0181  | 0.967655 |
| Esy1          | chr10:128510247-128525859 | 133.7681 | 135.5255 | 0.0188  | 0.927223 |
| Ormdl2        | chr10:128817456-128821631 | 28.5730  | 28.8964  | 0.0162  | 0.869411 |
| Xpo1          | chr11:23256040-23298249   | 53.4617  | 54.0069  | 0.0146  | 0.921488 |
| Bcl11a        | chr11:24078055-24174123   | 0.0679   | 0.0690   | 0.0226  | 0.988824 |
| Ccdc88a       | chr11:29373657-29510808   | 0.7161   | 0.7180   | 0.0039  | 0.991714 |
| Atad5         | chr11:80089399-80135794   | 9.6142   | 9.7087   | 0.0141  | 0.954220 |
| Acsf2         | chr11:94557101-94601871   | 1.3395   | 1.3622   | 0.0242  | 0.973100 |
| Xylt2         | chr11:94663850-94677515   | 11.7132  | 11.8802  | 0.0204  | 0.892491 |
| Psmb3         | chr11:97703398-97713500   | 16.6695  | 16.8080  | 0.0119  | 0.966744 |
| Rundc1        | chr11:101425084-101435673 | 9.2032   | 9.2819   | 0.0123  | 0.945955 |
| Etv4          | chr11:101769741-101785371 | 0.7959   | 0.8075   | 0.0209  | 0.980101 |
| Cog1          | chr11:113649168-113667054 | 17.7240  | 17.9398  | 0.0175  | 0.923010 |
| Gm26613       | chr11:115615461-115626707 | 6.4082   | 6.4507   | 0.0095  | 0.981157 |
| Arhgdia       | chr11:120578103-120581624 | 87.1700  | 88.2515  | 0.0178  | 0.919490 |
| Prps1l3       | chr12:57230411-57239882   | 39.3990  | 39.7861  | 0.0141  | 0.924586 |
| Gm26723       | chr12:100208987-100209814 | 22.9939  | 23.2752  | 0.0175  | 0.947743 |
| Zfyve21       | chr12:111814169-111828388 | 2.7611   | 2.8050   | 0.0228  | 0.937167 |
| Esy2          | chr12:116281221-116373096 | 85.3177  | 86.3398  | 0.0172  | 0.826413 |
| Tbcd17        | chr13:43151743-43171501   | 3.7577   | 3.7755   | 0.0068  | 0.988878 |
| Acot12        | chr13:91741511-91786148   | 0.3744   | 0.3800   | 0.0213  | 0.989895 |
| Ccdc125       | chr13:100669480-100697240 | 13.9534  | 14.0914  | 0.0142  | 0.963761 |
| Ankrd55       | chr13:112288450-112384002 | 2.4918   | 2.5209   | 0.0167  | 0.938659 |
| Gm5106        | chr5:8773576-8798523      | 0.5251   | 0.5162   | -0.0245 | 0.987095 |
| Gm26648       | chr5:24696901-24704690    | 12.9010  | 13.0669  | 0.0184  | 0.880145 |
| Depdc5        | chr5:32863700-32994231    | 5.3215   | 5.3709   | 0.0133  | 0.927327 |
| Tada2b        | chr5:36473669-36484285    | 7.0578   | 7.1266   | 0.0140  | 0.932084 |
| Rhoh          | chr5:65863568-65896700    | 46.9810  | 47.5648  | 0.0178  | 0.835965 |
| Nfxl1         | chr5:72513300-72559684    | 2.3594   | 2.3864   | 0.0164  | 0.949523 |
| Atp5k         | chr5:108433243-108434448  | 56.0696  | 56.5352  | 0.0119  | 0.970757 |
| Rnf34         | chr5:122850187-122868945  | 26.9344  | 27.1306  | 0.0105  | 0.947937 |
| Setd1b        | chr5:123142192-123167435  | 1.9881   | 2.0105   | 0.0162  | 0.965568 |
| Bri3bp        | chr5:125441567-125460872  | 5.2804   | 5.3329   | 0.0143  | 0.926664 |
| Cct6a         | chr5:129787438-129845820  | 126.3821 | 127.9226 | 0.0175  | 0.928090 |
| Cox19         | chr5:139336188-139345233  | 4.0382   | 4.0631   | 0.0089  | 0.977659 |
| Aimp2         | chr5:143902703-143909847  | 18.2300  | 18.3433  | 0.0089  | 0.981808 |
| 1700028E10Rik | chr5:151368708-151414083  | 1.9554   | 1.9782   | 0.0167  | 0.975501 |
| Trbv19        | chr6:41178588-41179048    | 69.3887  | 70.2055  | 0.0169  | 0.961057 |
| Slc4a5        | chr6:83219827-83304945    | 0.2388   | 0.2430   | 0.0250  | 0.943818 |
| Ap1f          | chr6:87628428-87672168    | 2.3708   | 2.3951   | 0.0147  | 0.975898 |
| Mlf2          | chr6:124931387-124936138  | 50.1659  | 50.7500  | 0.0167  | 0.941656 |
| Zfp384        | chr6:125009144-125037870  | 6.5611   | 6.6557   | 0.0206  | 0.911693 |
| Mboat7        | chr7:3677789-3693523      | 7.8548   | 7.9310   | 0.0139  | 0.939437 |
| Lair1         | chr7:4007072-4063204      | 2.2640   | 2.3026   | 0.0244  | 0.962031 |
| Ttyh1         | chr7:4119407-4136706      | 0.4309   | 0.4361   | 0.0172  | 0.984332 |
| Bckdha        | chr7:25629851-25658761    | 17.8793  | 18.0891  | 0.0168  | 0.944838 |
| Hnrnpul1      | chr7:25721497-25754730    | 89.1465  | 90.0375  | 0.0143  | 0.890967 |
| Timm50        | chr7:28305515-28312072    | 13.3131  | 13.4264  | 0.0122  | 0.960563 |
| Lsm14a        | chr7:34344645-34389540    | 30.5715  | 30.9351  | 0.0171  | 0.892517 |
| Ftl1          | chr7:45457943-45459884    | 74.1259  | 74.9682  | 0.0163  | 0.941679 |
| Ptpn5         | chr7:47077797-47133684    | 3.0439   | 3.0645   | 0.0097  | 0.982482 |
| Lrrc28        | chr7:67513410-67645236    | 3.0851   | 3.1112   | 0.0122  | 0.973223 |
| Rhog          | chr7:102239122-102250123  | 31.9047  | 32.1887  | 0.0128  | 0.957444 |

|               |                           |          |          |         |          |
|---------------|---------------------------|----------|----------|---------|----------|
| Sept1         | chr7:127214446-127218498  | 173.1771 | 175.2834 | 0.0174  | 0.878680 |
| Gm16201       | chr7:139950395-139978977  | 1.0245   | 1.0364   | 0.0166  | 0.973448 |
| Tpcn2         | chr7:145253922-145283927  | 7.0512   | 7.1273   | 0.0155  | 0.937853 |
| Kxd1          | chr8:70508271-70527956    | 17.7069  | 17.9670  | 0.0210  | 0.932797 |
| Fkbp8         | chr8:70527723-70535328    | 52.8973  | 53.3883  | 0.0133  | 0.945131 |
| Inpp4b        | chr8:81342555-82125036    | 103.9260 | 104.8820 | 0.0132  | 0.923506 |
| Zfp330        | chr8:82763620-82774160    | 24.9949  | 25.1791  | 0.0106  | 0.970772 |
| 4930432K21Rik | chr8:84148024-84172590    | 1.4229   | 1.4402   | 0.0174  | 0.974228 |
| Mir23a        | chr8:84208517-84208592    | 8.2168   | 8.4260   | 0.0363  | 0.982223 |
| Ier2          | chr8:84661330-84662852    | 40.7583  | 41.1782  | 0.0148  | 0.929892 |
| Nfix          | chr8:84699875-84800344    | 1.0799   | 1.0916   | 0.0156  | 0.965174 |
| Cyld          | chr8:88697027-88751945    | 44.8855  | 45.3412  | 0.0146  | 0.869370 |
| Gpr114        | chr8:94923693-94943290    | 1.0460   | 1.0631   | 0.0234  | 0.976150 |
| Nutf2         | chr8:105860633-105880402  | 1.5645   | 1.6021   | 0.0343  | 0.954863 |
| Vps9d1        | chr8:123242355-123254348  | 5.8495   | 5.9301   | 0.0197  | 0.895575 |
| Man2c1        | chr9:57130689-57142722    | 11.3282  | 11.4411  | 0.0143  | 0.933168 |
| Plekho2       | chr9:65554385-65580040    | 24.9875  | 25.2957  | 0.0177  | 0.893918 |
| Zfp280d       | chr9:72274898-72363770    | 20.2196  | 20.4881  | 0.0190  | 0.919322 |
| Gm614         | chrX:101261375-101263992  | 9.4945   | 9.6225   | 0.0193  | 0.933990 |
| Vcp-rs        | chrX:104345828-104348234  | 2.8448   | 2.8746   | 0.0151  | 0.976196 |
| Fgd1          | chrX:151046149-151089521  | 0.9831   | 0.9980   | 0.0216  | 0.964089 |
| G530011O06Rik | chrX:169975042-169978917  | 1.2893   | 1.3157   | 0.0292  | 0.974298 |
| Eny2          | chr15:44428110-44437685   | 12.2056  | 12.3255  | 0.0141  | 0.967300 |
| Triobp        | chr15:78947723-79005867   | 6.3333   | 6.4105   | 0.0175  | 0.929467 |
| B130046B21Rik | chr15:98807031-98816077   | 25.3453  | 25.6099  | 0.0150  | 0.928422 |
| Smardc1       | chr15:99702286-99713995   | 10.7487  | 10.8972  | 0.0198  | 0.904406 |
| Camk2g        | chr14:20734874-20794088   | 15.5589  | 15.7241  | 0.0152  | 0.866857 |
| Dcaf11        | chr14:55560005-55570065   | 11.9350  | 12.0748  | 0.0168  | 0.889023 |
| Zbtbd6        | chr14:79451834-79454816   | 0.8943   | 0.9109   | 0.0266  | 0.948111 |
| B930095G15Rik | chr14:121248705-121251497 | 0.7311   | 0.7450   | 0.0272  | 0.975718 |
| Rsph3a        | chr17:7945652-7979824     | 1.6820   | 1.7049   | 0.0195  | 0.973807 |
| Sft2d1        | chr17:8311101-8396852     | 8.0914   | 8.1689   | 0.0138  | 0.964072 |
| Hcfc1r1       | chr17:23673595-23675227   | 12.1196  | 12.2117  | 0.0109  | 0.982956 |
| Igfals        | chr17:24878769-24882008   | 0.6974   | 0.7009   | 0.0073  | 0.988610 |
| Zfp763        | chr17:33016862-33033402   | 6.0118   | 6.0811   | 0.0165  | 0.951885 |
| H2-Oa         | chr17:34092339-34095234   | 7.4590   | 7.5163   | 0.0110  | 0.947387 |
| Rpp21         | chr17:36255644-36258069   | 20.3929  | 20.7188  | 0.0229  | 0.919273 |
| Runx2         | chr17:44495986-44814797   | 2.4855   | 2.5176   | 0.0185  | 0.971527 |
| Runx2os2      | chr17:44710221-44713925   | 2.3821   | 2.3762   | -0.0036 | 0.996070 |
| Thap7         | chr16:17527981-17531136   | 17.6410  | 17.8541  | 0.0173  | 0.956791 |
| Cpox          | chr16:58670207-58680391   | 9.1295   | 9.2114   | 0.0129  | 0.961235 |
| Ccs           | chr19:4825365-4839322     | 40.5020  | 41.0226  | 0.0184  | 0.876608 |
| Slc25a45      | chr19:5877807-5885766     | 21.3094  | 21.5422  | 0.0157  | 0.941859 |
| Best1         | chr19:9985173-10001633    | 0.2734   | 0.2806   | 0.0372  | 0.978479 |
| Gm9806        | chr19:16780546-16781103   | 10.4686  | 10.5076  | 0.0054  | 0.984505 |
| Cbwd1         | chr19:24919915-24961616   | 7.4366   | 7.5301   | 0.0180  | 0.961529 |
| Ubt1d1        | chr19:41981762-42034641   | 3.6220   | 3.6600   | 0.0151  | 0.977969 |
| Snhg6         | chr1:9941958-9944118      | 26.1120  | 26.4687  | 0.0196  | 0.935962 |
| Trip12        | chr1:84721188-84839304    | 74.2531  | 75.0865  | 0.0161  | 0.793161 |
| Psmd1         | chr1:86064386-86139151    | 34.0214  | 34.4154  | 0.0166  | 0.900984 |
| Cops7b        | chr1:86582903-86606978    | 6.5672   | 6.6398   | 0.0158  | 0.951647 |
| Rbm44         | chr1:91145102-91170795    | 1.1639   | 1.1893   | 0.0312  | 0.984220 |
| D2hgdh        | chr1:93825239-93852348    | 4.4036   | 4.4291   | 0.0083  | 0.984052 |
| Tmem9         | chr1:136008218-136035030  | 7.5035   | 7.5989   | 0.0182  | 0.918158 |
| Mrps14        | chr1:160195214-160202170  | 7.7917   | 7.8615   | 0.0129  | 0.952775 |
| BC055324      | chr1:163945992-163994796  | 8.5004   | 8.5704   | 0.0118  | 0.958720 |
| Kmo           | chr1:175620380-175662116  | 0.5494   | 0.5510   | 0.0044  | 0.994095 |
| Gm26823       | chr18:31859081-31861764   | 0.6435   | 0.6450   | 0.0033  | 0.995794 |
| Reep2         | chr18:34840588-34847463   | 4.5967   | 4.6445   | 0.0149  | 0.974677 |
| Gm26109       | chr18:34942643-34942713   | 10.4043  | 10.4359  | 0.0044  | 0.997824 |
| Pggt1b        | chr18:46239948-46280850   | 10.3211  | 10.4146  | 0.0130  | 0.959107 |
| Isoc1         | chr18:58659481-58679570   | 24.6299  | 24.9012  | 0.0158  | 0.936975 |
| Apbb1ip       | chr2:22774093-22875653    | 7.6450   | 7.7288   | 0.0157  | 0.963459 |
| Fut7          | chr2:25423266-25426374    | 4.4351   | 4.5047   | 0.0225  | 0.951866 |
| Sardh         | chr2:27188392-27248337    | 0.3598   | 0.3605   | 0.0026  | 0.995972 |
| Mapkap1       | chr2:34406770-34624950    | 19.2335  | 19.3872  | 0.0115  | 0.951643 |
| Fmnl2         | chr2:52857859-53134202    | 0.8728   | 0.8833   | 0.0171  | 0.967358 |
| Clp1          | chr2:84722103-84727350    | 13.1173  | 13.2914  | 0.0190  | 0.937357 |
| Thbs1         | chr2:118111875-118127133  | 0.2630   | 0.2632   | 0.0010  | 0.998621 |
| Pak6          | chr2:118663302-118698020  | 0.3198   | 0.3209   | 0.0052  | 0.993508 |
| Fam210b       | chr2:172345564-172355749  | 4.4754   | 4.4976   | 0.0071  | 0.980280 |

|               |                           |         |         |         |          |
|---------------|---------------------------|---------|---------|---------|----------|
| Tpd52         | chr3:8928625-9004723      | 3.8041  | 3.8485  | 0.0168  | 0.906691 |
| Gm24786       | chr3:9829619-9829728      | 9.5967  | 9.5269  | -0.0105 | 0.989909 |
| Nudt6         | chr3:37404909-37420211    | 5.1579  | 5.2268  | 0.0192  | 0.958446 |
| Mnd1          | chr3:84087933-84155786    | 1.5112  | 1.5307  | 0.0185  | 0.984516 |
| Rfx5          | chr3:94954074-94961561    | 14.5738 | 14.7137 | 0.0138  | 0.893822 |
| Gm6485        | chr3:104752726-104753165  | 1.9466  | 2.0078  | 0.0447  | 0.965422 |
| Psm5          | chr3:108256925-108279974  | 12.7030 | 12.8652 | 0.0183  | 0.952429 |
| Elovl6        | chr3:129532385-129638495  | 6.7455  | 6.8191  | 0.0157  | 0.951426 |
| Ube2d3        | chr3:135438296-135467178  | 95.9496 | 96.7665 | 0.0122  | 0.955445 |
| H2afz         | chr3:137864486-137866922  | 17.8743 | 18.0005 | 0.0101  | 0.975628 |
| Prpf38a       | chr4:108563171-108579336  | 13.6143 | 13.7354 | 0.0128  | 0.954887 |
| C77080        | chr4:129219577-129261404  | 0.4478  | 0.4551  | 0.0233  | 0.976717 |
| Pef1          | chr4:130102557-130128135  | 12.4112 | 12.5552 | 0.0166  | 0.937090 |
| Gm10300       | chr4:132074696-132076992  | 0.4563  | 0.4583  | 0.0063  | 0.995315 |
| Casz1         | chr4:14880428-148954889   | 0.5121  | 0.5200  | 0.0221  | 0.953039 |
| Eldr          | chr11:16935153-16951282   | 1.4621  | 1.4937  | 0.0308  | 0.978421 |
| Slc36a3       | chr11:55124814-55151708   | 0.4891  | 0.5055  | 0.0475  | 0.959366 |
| Adam22        | chr5:8072351-8368160      | 0.4580  | 0.4605  | 0.0076  | 0.993683 |
| Gm15610       | chr5:8971947-8972142      | 4.7352  | 4.7189  | -0.0050 | 0.995202 |
| Gpr125        | chr5:49959950-50058996    | 0.1385  | 0.1450  | 0.0661  | 0.962340 |
| Atp1a3        | chr7:24978166-25005957    | 0.2283  | 0.2282  | -0.0010 | 0.999134 |
| Gm16046       | chr17:13675661-13683516   | 0.5378  | 0.5408  | 0.0082  | 0.995227 |
| Rgl1          | chr1:152516758-152766351  | 0.3846  | 0.3868  | 0.0082  | 0.993347 |
| Cstad         | chr2:30595039-30608943    | 1.3597  | 1.3706  | 0.0115  | 0.980361 |
| Gm23301       | chr18:75001454-75001519   | 28.2515 | 28.5787 | 0.0166  | 0.990069 |
| Gm10254       | chr3:54810563-54811250    | 1.5188  | 1.5444  | 0.0241  | 0.976916 |
| Gm13166       | chr4:146251828-146278434  | 0.6937  | 0.6964  | 0.0058  | 0.995585 |
| Gm11510       | chr11:88432985-88433514   | 3.1415  | 3.1587  | 0.0079  | 0.995438 |
| Gm15824       | chr5:64190031-64190989    | 2.1046  | 2.0947  | -0.0068 | 0.996547 |
| Trav8d-1      | chr14:52778446-52778994   | 1.5558  | 1.5436  | -0.0114 | 0.993458 |
| Traj51        | chr14:54166238-54166281   | 28.8712 | 28.7937 | -0.0039 | 0.997547 |
| Gm7162        | chr17:12819818-12820842   | 1.2901  | 1.2790  | -0.0125 | 0.992087 |
| 1700009P17Rik | chr1:171113917-171126967  | 0.3521  | 0.3502  | -0.0077 | 0.995626 |
| 0610010K14Rik | chr11:70235205-70237914   | 15.7767 | 15.8985 | 0.0111  | 0.974584 |
| Dgke          | chr11:89035178-89066850   | 7.6261  | 7.7204  | 0.0177  | 0.927342 |
| Spag9         | chr11:93996090-94126085   | 16.0090 | 16.1936 | 0.0165  | 0.888273 |
| D11Wsu47e     | chr11:113684411-113694647 | 9.4084  | 9.5196  | 0.0169  | 0.947612 |
| Tppp          | chr13:74009406-74035753   | 1.1974  | 1.2046  | 0.0087  | 0.976356 |
| Bcl2l14       | chr6:134396317-134438736  | 0.9666  | 0.9747  | 0.0120  | 0.973313 |
| Glce          | chr9:62057247-62070606    | 7.9596  | 8.0447  | 0.0153  | 0.954941 |
| Uchl4         | chr9:64235200-64236362    | 3.5399  | 3.5968  | 0.0230  | 0.954035 |
| Mto1          | chr9:78448207-78475348    | 8.4764  | 8.5661  | 0.0152  | 0.877663 |
| Alg12         | chr15:88805243-88819318   | 12.0517 | 12.1781 | 0.0150  | 0.894041 |
| Gm20726       | chr14:54632328-54632781   | 3.3885  | 3.4220  | 0.0142  | 0.983931 |
| Mdp1          | chr14:55657878-55660508   | 39.9265 | 40.3978 | 0.0169  | 0.950502 |
| C920025E04Rik | chr17:36109233-36111658   | 14.1288 | 14.2655 | 0.0139  | 0.957662 |
| Gtpbp2        | chr17:46161031-46169370   | 28.2052 | 28.5103 | 0.0155  | 0.945829 |
| Mamstr        | chr7:45639976-45646521    | 0.4536  | 0.4588  | 0.0162  | 0.989148 |
| Bcat2         | chr7:45570152-45589710    | 7.4074  | 7.4990  | 0.0177  | 0.912292 |
| Ntpcr         | chr8:125729962-125748235  | 3.2768  | 3.3277  | 0.0222  | 0.951411 |
| Slc12a2       | chr18:57878677-57946821   | 4.8827  | 4.9486  | 0.0194  | 0.952376 |
| Fbxw2         | chr2:34804513-34826311    | 19.4052 | 19.6036 | 0.0147  | 0.928421 |
| Fam219aos     | chr4:41517436-41518929    | 1.3496  | 1.3565  | 0.0074  | 0.991630 |
| AV039307      | chr2:120850704-120866689  | 4.8439  | 4.8986  | 0.0162  | 0.911725 |
| Tmf1          | chr6:97155265-97179124    | 45.4363 | 45.9087 | 0.0149  | 0.537380 |
| Emc6          | chr11:73175518-73177037   | 27.2283 | 27.5219 | 0.0155  | 0.968411 |
| Plk2          | chr13:110395043-110400844 | 0.9873  | 0.9910  | 0.0053  | 0.994314 |
| Vps33b        | chr7:80269648-80291579    | 13.1904 | 13.3343 | 0.0157  | 0.924981 |
| Gtpbp8        | chr16:44736767-44746363   | 16.2530 | 16.4265 | 0.0153  | 0.887120 |
| NA            | chr19:8772521-8774467     | 50.4730 | 50.8774 | 0.0115  | 0.975687 |
| Ctif          | chr18:75431223-75697696   | 0.5024  | 0.5084  | 0.0173  | 0.981375 |
| Ccdc166       | chr15:75979871-75982455   | 6.7225  | 6.7997  | 0.0165  | 0.902525 |
| Themis        | chr10:28668359-28883818   | 16.6857 | 16.8712 | 0.0160  | 0.922946 |
| Uqcrcq        | chr11:53427921-53430831   | 15.2201 | 15.3701 | 0.0141  | 0.976166 |
| Zfp512        | chr5:31452435-31481749    | 12.9276 | 13.0638 | 0.0151  | 0.885295 |
| Tlr1          | chr5:64924810-64932761    | 50.6038 | 51.1750 | 0.0162  | 0.922733 |
| Igsf23        | chr7:19937304-19950743    | 8.9716  | 9.0999  | 0.0205  | 0.942640 |
| Alkbh8        | chr9:3335477-3387050      | 7.1781  | 7.2589  | 0.0162  | 0.935804 |
| Mfsd3         | chr15:76701541-76704239   | 2.9622  | 2.9902  | 0.0136  | 0.975598 |
| Daxx          | chr17:33909413-33915589   | 35.8585 | 36.2341 | 0.0150  | 0.939693 |
| Gna14         | chr19:16435666-16610818   | 1.3032  | 1.3173  | 0.0155  | 0.983486 |

|               |                           |         |         |          |          |
|---------------|---------------------------|---------|---------|----------|----------|
| Cers2         | chr3:95314791-95323588    | 42.4737 | 42.9642 | 0.0166   | 0.875472 |
| Pdp1          | chr4:11958183-11966452    | 6.9904  | 7.0594  | 0.0142   | 0.960672 |
| Gm12350       | chr4:34485831-34486293    | 3.5415  | 3.5751  | 0.0136   | 0.972979 |
| Gm15347       | chr8:12860357-12877344    | 6.5582  | 6.6309  | 0.0159   | 0.987842 |
| Map6d1        | chr16:20233309-20241358   | 0.3632  | 0.3700  | 0.0268   | 0.983025 |
| Gm26585       | chr10:22452890-22453520   | 0.8004  | 0.1356  | -2.5613  | 0.370997 |
| n-R5s76       | chr10:31317168-31317281   | 4.2142  | 2.9099  | -0.5343  | 0.760474 |
| Zufsp         | chr10:33926935-33951212   | 23.7155 | 27.6294 | 0.2204   | 0.435728 |
| Lama4         | chr10:38965514-39110188   | 0.0535  | 0.0001  | -9.0630  | 0.285591 |
| Fam184a       | chr10:53633144-53750909   | 0.1798  | 0.0251  | -2.8412  | 0.286620 |
| Gm16998       | chr10:54075921-54081081   | 0.7356  | 0.1174  | -2.6470  | 0.003997 |
| H2afy2        | chr10:61738664-61784147   | 0.1546  | 0.0429  | -1.8502  | 0.447744 |
| Gm16143       | chr10:63055602-63057467   | 1.1976  | 0.0001  | -13.5479 | 0.285591 |
| Gnaz          | chr10:74967176-75016907   | 0.1707  | 0.0119  | -3.8403  | 0.317329 |
| Col6a2        | chr10:76595761-76623630   | 0.0961  | 0.0033  | -4.8749  | 0.265535 |
| Gm24019       | chr10:79909194-79909301   | 5.7594  | 0.8834  | -2.7048  | 0.364925 |
| Jsrp1         | chr10:80808495-80813498   | 0.2523  | 0.0232  | -3.4437  | 0.328383 |
| Ap3m1-ps      | chr10:82585405-82587534   | 0.3392  | 0.1500  | -1.1774  | 0.530707 |
| Gm25657       | chr10:84614718-84614813   | 5.8972  | 0.0001  | -15.8477 | 0.285591 |
| Gm8394        | chr10:85313487-85314439   | 0.8843  | 0.1738  | -2.3471  | 0.316633 |
| Csl           | chr10:99757704-99759658   | 0.3326  | 0.0386  | -3.1077  | 0.094096 |
| Kcnc2         | chr10:112271122-112466304 | 0.1448  | 0.0624  | -1.2134  | 0.550671 |
| Myrf1         | chr10:116776544-116896879 | 0.1059  | 0.0600  | -0.8195  | 0.627614 |
| Srgap1        | chr10:121780990-122047315 | 0.0461  | 0.0152  | -1.6010  | 0.499070 |
| Avpr1a        | chr10:122448498-122453453 | 0.2308  | 0.0100  | -4.5296  | 0.305223 |
| Vmn2r85       | chr10:130417771-130429612 | 0.2211  | 0.0153  | -3.8508  | 0.317288 |
| Gm11963       | chr11:5498839-5505699     | 0.7783  | 0.6780  | -0.1990  | 0.859023 |
| Npc111        | chr11:6211012-6230143     | 0.1844  | 0.0037  | -5.6233  | 0.119106 |
| 4930415F15Rik | chr11:11462093-11515192   | 0.5230  | 0.3452  | -0.5993  | 0.686721 |
| Gm12664       | chr11:16643008-16643921   | 0.7364  | 0.0891  | -3.0463  | 0.347835 |
| Gm12107       | chr11:31832659-31838214   | 1.7308  | 3.4047  | 0.9761   | 0.501388 |
| Ltc4s         | chr11:50236468-50238616   | 0.9425  | 0.4724  | -0.9966  | 0.590852 |
| Hnrnp1        | chr11:50376989-50386528   | 93.0683 | 90.8863 | -0.0342  | 0.787354 |
| Gm12660       | chr11:50851331-50852582   | 1.2176  | 0.1304  | -3.2234  | 0.180212 |
| Gm12208       | chr11:52405315-52405478   | 5.2049  | 6.0182  | 0.2095   | 0.921572 |
| Slc22a21      | chr11:53949964-53980332   | 0.1714  | 0.0244  | -2.8146  | 0.285772 |
| P4ha2         | chr11:54100094-54131665   | 0.0585  | 0.0484  | -0.2717  | 0.858798 |
| Il3           | chr11:54265302-54267277   | 2.5672  | 0.0878  | -4.8700  | 0.159557 |
| Gjc2          | chr11:59175567-59183213   | 0.3843  | 0.0295  | -3.7053  | 0.176723 |
| Gm12263       | chr11:59474283-59475765   | 0.3004  | 0.1623  | -0.8881  | 0.518444 |
| Gm25819       | chr11:68996001-68996085   | 4.0017  | 1.4399  | -1.4747  | 0.499636 |
| Mir1934       | chr11:69663042-69663125   | 8.4373  | 0.5511  | -3.9364  | 0.315545 |
| Polr2a        | chr11:69733996-69758637   | 15.1150 | 13.3210 | -0.1823  | 0.686607 |
| Gm12314       | chr11:70429016-70429554   | 0.9522  | 0.1210  | -2.9763  | 0.268762 |
| Aipl1         | chr11:72027962-72037509   | 0.2840  | 0.1099  | -1.3701  | 0.519204 |
| Gm22733       | chr11:74936060-74936151   | 5.2330  | 0.1788  | -4.8713  | 0.301007 |
| 1700016K19Rik | chr11:75999911-76003569   | 0.3651  | 0.0001  | -11.8340 | 0.285591 |
| Gm22772       | chr11:77052946-77053067   | 6.5712  | 1.0296  | -2.6741  | 0.172269 |
| NA            | chr11:77149627-77150525   | 1.3652  | 0.5405  | -1.3367  | 0.506306 |
| Cryba1        | chr11:77718614-77725283   | 2.3489  | 0.4920  | -2.2552  | 0.311370 |
| Proca1        | chr11:78193391-78205763   | 0.9098  | 0.3413  | -1.4144  | 0.422575 |
| Gm23564       | chr11:84893086-84893153   | 7.5255  | 0.7863  | -3.2586  | 0.338114 |
| Cacna1g       | chr11:94408390-94474198   | 0.0341  | 0.0156  | -1.1292  | 0.436343 |
| Cdc34-ps      | chr11:94741781-94743014   | 0.6904  | 0.0651  | -3.4069  | 0.149732 |
| Gm11513       | chr11:95032758-95038283   | 0.6342  | 0.3290  | -0.9469  | 0.636634 |
| Gm26830       | chr11:95669951-95672719   | 0.9363  | 0.2764  | -1.7600  | 0.038570 |
| Gm25593       | chr11:101353341-101353437 | 6.5174  | 2.3275  | -1.4855  | 0.323838 |
| Gm23849       | chr11:101627365-101627556 | 4.3396  | 1.6622  | -1.3844  | 0.226573 |
| Gm11628       | chr11:102492438-102492609 | 3.2763  | 1.2394  | -1.4025  | 0.502907 |
| Hexim1        | chr11:103116324-103119725 | 15.9888 | 14.9803 | -0.0940  | 0.764594 |
| Cyb561        | chr11:105933701-105933336 | 0.1155  | 0.1452  | 0.3302   | 0.767611 |
| Gm25556       | chr11:106186443-106186587 | 10.5044 | 1.9338  | -2.4415  | 0.375974 |
| NA            | chr11:106725257-106725450 | 5.1703  | 0.8697  | -2.5717  | 0.224613 |
| Foxj1         | chr11:116330703-116335399 | 0.3845  | 0.0748  | -2.3627  | 0.382976 |
| Npb           | chr11:120608476-120609093 | 1.2804  | 0.6309  | -1.0212  | 0.049989 |
| NA            | chr11:121942409-121956727 | 0.4302  | 0.0374  | -3.5258  | 0.326031 |
| Gm17541       | chr12:4689401-4689926     | 1.5079  | 0.7063  | -1.0942  | 0.497626 |
| Mir1938       | chr12:40222711-40222811   | 6.4350  | 3.6656  | -0.8119  | 0.627221 |
| Gm25497       | chr12:41348440-41348572   | 2.7588  | 0.0001  | -14.7517 | 0.285591 |
| Gm1818        | chr12:48554181-48559971   | 0.4150  | 0.0272  | -3.9308  | 0.080923 |
| Gm7456        | chr12:49140255-49141266   | 0.3049  | 0.0819  | -1.8956  | 0.450909 |

|               |                           |          |          |          |          |
|---------------|---------------------------|----------|----------|----------|----------|
| Gm25970       | chr12:65056572-65056658   | 5.2115   | 5.7859   | 0.1508   | 0.927851 |
| Mnat1         | chr12:73123716-73273988   | 8.7189   | 10.3169  | 0.2428   | 0.488793 |
| Mthfd1        | chr12:76255231-76319820   | 35.3224  | 28.0813  | -0.3310  | 0.230003 |
| Gpx2          | chr12:76792334-76795554   | 0.8927   | 0.0001   | -13.1239 | 0.285591 |
| Gm10433       | chr12:100187967-100193540 | 0.2363   | 0.0591   | -1.9997  | 0.436381 |
| Itgb8         | chr12:119158021-119238802 | 11.3698  | 11.6871  | 0.0397   | 0.900415 |
| Epdr1         | chr13:19591708-19619830   | 0.3232   | 0.0802   | -2.0112  | 0.391550 |
| A530099J19Rik | chr13:19727416-19732951   | 0.2324   | 0.0001   | -11.1826 | 0.285591 |
| Gpr141        | chr13:19749681-19824257   | 0.1225   | 0.0827   | -0.5668  | 0.772319 |
| Gm11366       | chr13:30181715-30182144   | 2.4598   | 0.2915   | -3.0770  | 0.144730 |
| Riok1         | chr13:38036988-38061433   | 27.3820  | 33.8518  | 0.3060   | 0.231728 |
| 5033403F01Rik | chr13:38960618-38966299   | 0.5467   | 0.1601   | -1.7716  | 0.215330 |
| Gm7664        | chr13:62528209-62528959   | 0.6724   | 0.0353   | -4.2501  | 0.309949 |
| Gm6910        | chr13:66007671-66009240   | 0.4821   | 0.0726   | -2.7305  | 0.366258 |
| Gm9625        | chr13:67810245-67811200   | 17.3539  | 15.4023  | -0.1721  | 0.683729 |
| Gm24507       | chr13:90098980-90099114   | 4.6195   | 2.2772   | -1.0205  | 0.432603 |
| Map1b         | chr13:99421463-99516602   | 0.1573   | 0.0317   | -2.3127  | 0.373719 |
| Actbl2        | chr13:111255012-111257749 | 0.4504   | 0.0914   | -2.3004  | 0.387588 |
| Ddx4          | chr13:112598332-112652310 | 0.1832   | 0.0447   | -2.0354  | 0.194142 |
| Ccl28         | chr13:119623818-119654354 | 0.2890   | 0.0246   | -3.5551  | 0.299189 |
| Cdk14         | chr5:4803390-5420312      | 0.0585   | 0.0151   | -1.9530  | 0.420484 |
| Rpl31-ps5     | chr5:20806089-20806464    | 1.1953   | 0.3694   | -1.6939  | 0.456674 |
| Gm22333       | chr5:24438485-24438586    | 18.9403  | 1.0667   | -4.1502  | 0.090468 |
| Cct8l1        | chr5:25516066-25518021    | 0.2580   | 0.0640   | -2.0102  | 0.422534 |
| Fam193a       | chr5:34369932-34486456    | 14.0945  | 11.0008  | -0.3575  | 0.171002 |
| NA            | chr5:34395549-34395653    | 6.9218   | 0.0001   | -16.0789 | 0.070128 |
| Sod3          | chr5:52363945-52371405    | 0.1727   | 0.0001   | -10.7542 | 0.285591 |
| Lgi2          | chr5:52537863-52566303    | 0.1868   | 0.0272   | -2.7799  | 0.362829 |
| N4bp2os       | chr5:65760990-65763866    | 0.5606   | 0.5812   | 0.0521   | 0.962346 |
| Gm24346       | chr5:65777013-65777207    | 3.7107   | 0.2358   | -3.9758  | 0.085779 |
| Chrna9        | chr5:65934920-65977326    | 0.1579   | 0.0383   | -2.0439  | 0.411620 |
| Atp10d        | chr5:72203328-72298775    | 19.4963  | 17.8919  | -0.1239  | 0.451820 |
| Usp4Gos1      | chr5:74014215-74029680    | 1.7554   | 0.5579   | -1.6536  | 0.200335 |
| Lphn3         | chr5:81020137-81825133    | 0.0444   | 0.0331   | -0.4217  | 0.807372 |
| Gm8145        | chr5:107241622-107242367  | 0.9151   | 0.1809   | -2.3384  | 0.236428 |
| Cabp1         | chr5:115168688-115194381  | 0.3412   | 0.0924   | -1.8849  | 0.236979 |
| Gm24407       | chr5:115490253-115490394  | 230.8820 | 409.6437 | 0.8272   | 0.434060 |
| Gm15728       | chr5:117389138-117393498  | 0.2825   | 0.0556   | -2.3440  | 0.127223 |
| Gm15749       | chr5:120648039-120648749  | 1.4281   | 0.0532   | -4.7455  | 0.074718 |
| Gusb          | chr5:129989010-130003049  | 15.4007  | 12.3494  | -0.3186  | 0.301780 |
| Gm15921       | chr5:130208079-130208562  | 0.8700   | 1.3513   | 0.6352   | 0.592701 |
| Sh2b2         | chr5:136218148-136244903  | 0.2545   | 0.1198   | -1.0862  | 0.432937 |
| Vgf           | chr5:137030294-137033351  | 0.2634   | 0.0128   | -4.3589  | 0.307930 |
| Ache          | chr5:137287518-137294466  | 0.1981   | 0.0399   | -2.3121  | 0.168930 |
| Mir93         | chr5:138165522-138165610  | 8.8841   | 3.9775   | -1.1594  | 0.337068 |
| 1700001J03Rik | chr5:146182449-146185304  | 0.9277   | 0.2183   | -2.0876  | 0.396307 |
| Ing3          | chr6:21949570-21976038    | 9.3071   | 9.2027   | -0.0163  | 0.940264 |
| Tmem140       | chr6:34863145-34874946    | 6.8348   | 7.1580   | 0.0667   | 0.817889 |
| Gm23435       | chr6:35243594-35243750    | 1.7957   | 0.4384   | -2.0343  | 0.422305 |
| 2210010C04Rik | chr6:41030267-41035509    | 0.1701   | 0.0001   | -10.7322 | 0.285591 |
| Gm16630       | chr6:48130917-48395408    | 0.1498   | 0.0150   | -3.3185  | 0.096339 |
| Gm24325       | chr6:48420768-48420842    | 10.7262  | 0.6593   | -4.0240  | 0.190454 |
| Snx10         | chr6:51523900-51590679    | 4.8091   | 4.2634   | -0.1738  | 0.637553 |
| Hotairm1      | chr6:52156901-52162119    | 0.8746   | 0.0963   | -3.1833  | 0.338250 |
| Hoxa9         | chr6:52223099-52231089    | 0.1407   | 0.0001   | -10.4580 | 0.285591 |
| Rpia          | chr6:70765719-70792232    | 11.5234  | 11.2032  | -0.0407  | 0.872853 |
| Chl1          | chr6:103510875-103733035  | 0.0471   | 0.0056   | -3.0698  | 0.341888 |
| Mkrn2os       | chr6:115583543-115592576  | 0.1465   | 0.2137   | 0.5445   | 0.561351 |
| Lrtm2         | chr6:119315132-119330766  | 0.0957   | 0.0461   | -1.0534  | 0.574280 |
| Rimklb        | chr6:122447295-122486313  | 0.1084   | 0.0380   | -1.5106  | 0.212515 |
| C3ar1         | chr6:122847137-122856161  | 0.3059   | 0.0382   | -2.9999  | 0.345341 |
| Gm4691        | chr6:128202012-128203276  | 0.4274   | 0.0113   | -5.2415  | 0.297272 |
| Clec9a        | chr6:129408861-129424764  | 0.2597   | 0.0201   | -3.6912  | 0.288738 |
| Gm6654        | chr6:146647240-146647588  | 0.8855   | 1.4569   | 0.7183   | 0.579323 |
| Kdm5d         | chrY:897787-943811        | 25.5954  | 0.0175   | -10.5159 | 0.000191 |
| Eif2s3y       | chrY:1010542-1028847      | 29.9564  | 0.0179   | -10.7110 | 0.000113 |
| Uty           | chrY:1096860-1245759      | 12.4002  | 0.0350   | -8.4707  | 0.000206 |
| Ddx3y         | chrY:1260714-1286613      | 53.7571  | 0.0222   | -11.2446 | 0.000060 |
| Ehd2          | chr7:15946976-15967567    | 0.1086   | 0.0328   | -1.7280  | 0.209405 |
| Slc8a2        | chr7:16130299-16160509    | 0.1457   | 0.0001   | -10.5086 | 0.285591 |
| Nkpd1         | chr7:19518730-19525050    | 0.3146   | 0.0097   | -5.0195  | 0.106863 |

|               |                          |          |          |          |          |
|---------------|--------------------------|----------|----------|----------|----------|
| C030039L03Rik | chr7:27689339-27706484   | 1.4733   | 1.0007   | -0.5580  | 0.567850 |
| Gm26891       | chr7:27927723-27931003   | 0.2147   | 0.1653   | -0.3770  | 0.687800 |
| Fcgbp         | chr7:28071235-28120862   | 0.0348   | 0.0001   | -8.4426  | 0.285591 |
| 9530053A07Rik | chr7:28129465-28164811   | 0.0663   | 0.0001   | -9.3734  | 0.285591 |
| Siglece       | chr7:43651069-43660161   | 0.4813   | 0.1040   | -2.2105  | 0.393217 |
| Klk6          | chr7:43824498-43832027   | 0.5584   | 0.0001   | -12.4471 | 0.285591 |
| Gm25386       | chr7:44239747-44240035   | 1.4590   | 0.0001   | -13.8327 | 0.285591 |
| Ccdc155       | chr7:45183623-45204892   | 0.2015   | 0.1021   | -0.9803  | 0.618648 |
| Ppfia3        | chr7:45339125-45367019   | 0.0848   | 0.0807   | -0.0706  | 0.964116 |
| NA            | chr7:45743323-45743561   | 4.2631   | 0.2051   | -4.3778  | 0.042687 |
| Gm6226        | chr7:58836792-58837938   | 0.4296   | 0.3612   | -0.2505  | 0.840363 |
| Gm25282       | chr7:75668872-75668956   | 9.4657   | 3.4967   | -1.4367  | 0.344478 |
| Acan          | chr7:79053482-79115099   | 0.1562   | 0.0073   | -4.4226  | 0.306764 |
| Gm16017       | chr7:79412309-79412517   | 6.1949   | 0.0001   | -15.9188 | 0.285591 |
| 1700010L04Rik | chr7:82851962-82859849   | 0.8227   | 0.0219   | -5.2323  | 0.159687 |
| Thrsp         | chr7:97412937-97417730   | 0.3250   | 0.2007   | -0.6956  | 0.610458 |
| Omp           | chr7:98143359-98145502   | 0.3468   | 0.0826   | -2.0695  | 0.375221 |
| Gucy2d        | chr7:98443420-98477478   | 0.1638   | 0.1423   | -0.2033  | 0.875186 |
| Gm23479       | chr7:98935893-98936015   | 6.4289   | 1.4830   | -2.1161  | 0.410754 |
| Snord15b      | chr7:99479562-99479707   | 122.1934 | 192.4516 | 0.6553   | 0.468838 |
| Snord15a      | chr7:99482784-99482932   | 33.4312  | 62.2633  | 0.8972   | 0.473183 |
| Cox20-ps      | chr7:100580266-100580619 | 1.1904   | 0.3254   | -1.8709  | 0.435769 |
| Folr2         | chr7:101839989-101845331 | 0.6640   | 0.2581   | -1.3630  | 0.382119 |
| Gm25636       | chr7:110023209-110023342 | 5.2654   | 2.5670   | -1.0364  | 0.581187 |
| Dnah3         | chr7:119922716-120095177 | 0.0687   | 0.0198   | -1.7915  | 0.447699 |
| 4933427G17Rik | chr7:120982508-121014787 | 0.3565   | 0.2370   | -0.5888  | 0.682392 |
| 1700069B07Rik | chr7:121707188-121708011 | 0.7547   | 0.4196   | -0.8470  | 0.322425 |
| Gm14389       | chr7:122484194-122484420 | 1.6114   | 1.9433   | 0.2702   | 0.894033 |
| Cd19          | chr7:126408449-126414870 | 0.7366   | 0.3418   | -1.1076  | 0.550440 |
| BC017158      | chr7:128271378-128298170 | 8.0701   | 6.7958   | -0.2479  | 0.372354 |
| Gm23783       | chr7:128734201-128734303 | 6.8656   | 1.8810   | -1.8679  | 0.449363 |
| Fam24a        | chr7:131334621-131336716 | 1.5856   | 0.6762   | -1.2295  | 0.545605 |
| Gm15718       | chr7:132979581-132983552 | 1.0809   | 1.8712   | 0.7917   | 0.627652 |
| A130023I24Rik | chr7:134227473-134230705 | 0.2360   | 0.1056   | -1.1605  | 0.512227 |
| 1700029H14Rik | chr8:13550732-13562461   | 0.3549   | 0.3480   | -0.0284  | 0.985276 |
| Gm17149       | chr8:18656614-18656989   | 2.2233   | 0.1735   | -3.6793  | 0.306603 |
| Gm10689       | chr8:25454272-25454704   | 1.2951   | 1.0058   | -0.3647  | 0.825195 |
| Gm1815        | chr8:41657592-41658669   | 0.5463   | 0.0492   | -3.4737  | 0.329801 |
| Gm16178       | chr8:61117604-61194648   | 0.5794   | 0.3616   | -0.6802  | 0.712624 |
| Pik3r2        | chr8:70768175-70776713   | 7.9144   | 7.0950   | -0.1577  | 0.626945 |
| Slc5a5        | chr8:70882888-70892757   | 0.1532   | 0.0057   | -4.7598  | 0.302027 |
| Gm3835        | chr8:72429549-72429952   | 1.8768   | 0.1806   | -3.3775  | 0.329982 |
| Gm23468       | chr8:77569494-77569602   | 7.0029   | 3.1730   | -1.1421  | 0.579094 |
| Tpd52-ps      | chr8:79680265-79680824   | 1.3411   | 0.6570   | -1.0295  | 0.485689 |
| Mir709        | chr8:84086098-84086186   | 3.8198   | 1.9020   | -1.0060  | 0.620361 |
| Ccl22         | chr8:94745589-94751699   | 0.3495   | 0.0288   | -3.6029  | 0.324218 |
| Mir1966       | chr8:105615465-105615573 | 6.0165   | 1.0353   | -2.5389  | 0.119690 |
| Acta1         | chr8:123891766-123894736 | 0.4497   | 0.1905   | -1.2392  | 0.567788 |
| Nup133        | chr8:123897122-123949265 | 9.5589   | 9.6817   | 0.0184   | 0.945666 |
| Phxr4         | chr9:13431360-13432736   | 5.1583   | 2.2906   | -1.1712  | 0.322745 |
| S1pr5         | chr9:21242911-21248443   | 0.2787   | 0.0610   | -2.1926  | 0.214277 |
| Gm2976        | chr9:22479933-22480446   | 1.3992   | 0.5305   | -1.3991  | 0.363837 |
| 4833428L15Rik | chr9:45416625-45431232   | 0.4006   | 0.0001   | -11.9679 | 0.285591 |
| Rpl10-ps3     | chr9:50344239-50344981   | 0.4909   | 0.0617   | -2.9911  | 0.346947 |
| Gm23407       | chr9:55555621-55555712   | 5.5408   | 1.0165   | -2.4465  | 0.388190 |
| Clk3          | chr9:57750710-57765860   | 38.5712  | 33.3072  | -0.2117  | 0.343602 |
| Rec114        | chr9:58652855-58741559   | 3.6842   | 2.1255   | -0.7935  | 0.546839 |
| Gm16759       | chr9:63399380-63568691   | 0.3112   | 0.0001   | -11.6034 | 0.285591 |
| Cilp          | chr9:65265179-65280605   | 0.1187   | 0.0290   | -2.0326  | 0.431858 |
| A130057D12Rik | chr9:75441121-75441652   | 0.8969   | 0.0862   | -3.3787  | 0.331100 |
| Bfsp2         | chr9:103424919-103480328 | 0.4476   | 0.1721   | -1.3786  | 0.235752 |
| Col6a4        | chr9:105989453-106096783 | 0.1179   | 0.0089   | -3.7244  | 0.192820 |
| Sema3b        | chr9:107597673-107609229 | 0.1187   | 0.0898   | -0.4034  | 0.838976 |
| Gm590         | chr9:110914738-110916861 | 1.1016   | 1.0219   | -0.1083  | 0.930704 |
| Gad1l         | chr9:115909454-116076176 | 0.2872   | 0.0157   | -4.1901  | 0.118466 |
| Acvr2b        | chr9:119402443-119433501 | 0.6340   | 0.0001   | -12.6303 | 0.120961 |
| Scn5a         | chr9:119483407-119579016 | 0.0992   | 0.0341   | -1.5412  | 0.484798 |
| Psmb7-ps2     | chrX:8105293-8106113     | 1.1179   | 0.0001   | -13.4485 | 0.069575 |
| Gm16265       | chrX:12670634-12670742   | 8.2998   | 0.6965   | -3.5749  | 0.324661 |
| Gm23628       | chrX:20614522-20614695   | 2.3519   | 0.0001   | -14.5215 | 0.217496 |
| Gm7212        | chrX:48302875-48303223   | 0.9660   | 0.0001   | -13.2378 | 0.285591 |

|               |                           |          |         |          |          |
|---------------|---------------------------|----------|---------|----------|----------|
| Gm14719       | chrX:49660959-49661190    | 1.5765   | 1.8951  | 0.2655   | 0.858564 |
| Gm14846       | chrX:74278653-74278869    | 1.6860   | 0.0613  | -4.7822  | 0.302029 |
| Gm14753       | chrX:78021041-78021287    | 3.6439   | 0.0001  | -15.1532 | 0.285591 |
| Gm14764       | chrX:85744347-85749764    | 0.8950   | 0.1690  | -2.4053  | 0.391810 |
| Gm14828       | chrX:100337513-100338668  | 0.2669   | 0.0459  | -2.5408  | 0.380094 |
| Slc7a3        | chrX:101079209-101086020  | 0.1482   | 0.0452  | -1.7119  | 0.458062 |
| Nlgn3         | chrX:101299167-101325963  | 0.0859   | 0.0284  | -1.5978  | 0.118548 |
| Gm6238        | chrX:104382041-104382506  | 1.9682   | 0.2340  | -3.0725  | 0.139045 |
| Gm7117        | chrX:105725127-105725532  | 1.0391   | 1.0468  | 0.0107   | 0.992181 |
| Fam46d        | chrX:107792589-107872909  | 0.4876   | 0.0219  | -4.4757  | 0.305722 |
| Tmem35        | chrX:134295224-134305969  | 0.3506   | 0.0001  | -11.7756 | 0.285591 |
| Tro           | chrX:150645303-150657583  | 0.1136   | 0.0413  | -1.4596  | 0.237115 |
| Usp51         | chrX:153006468-153009416  | 0.1907   | 0.0396  | -2.2673  | 0.390351 |
| Gm15189       | chrX:159105914-159108491  | 0.3990   | 0.0001  | -11.9623 | 0.285591 |
| Gm15236       | chrX:165680203-165680582  | 2.2174   | 0.0350  | -5.9869  | 0.292481 |
| BC022960      | chrX:169368188-169370003  | 0.3184   | 0.1262  | -1.3345  | 0.271969 |
| Pabpc1        | chr15:36595660-36608973   | 57.2906  | 48.3288 | -0.2454  | 0.105465 |
| Mir30b        | chr15:68337414-68337510   | 6.1276   | 3.1096  | -0.9786  | 0.652639 |
| Gm7935        | chr15:74080233-74081511   | 0.7892   | 0.0104  | -6.2402  | 0.291308 |
| Gm15387       | chr15:74093182-74094402   | 0.3445   | 0.0773  | -2.1554  | 0.403787 |
| 4933427E11Rik | chr15:74709160-74710374   | 0.2539   | 0.1508  | -0.7518  | 0.689962 |
| Gm17189       | chr15:74784064-74800640   | 0.4980   | 0.1822  | -1.4508  | 0.502257 |
| Gm17271       | chr15:76797627-76798029   | 1.7135   | 0.2330  | -2.8782  | 0.114511 |
| Josd1         | chr15:79674249-79687872   | 14.8642  | 10.8754 | -0.4508  | 0.198926 |
| Gm8444        | chr15:81843342-81843699   | 1.9617   | 0.1689  | -3.5382  | 0.324905 |
| Cyp2d26       | chr15:82790106-82794245   | 0.4226   | 0.0321  | -3.7176  | 0.220047 |
| Scube1        | chr15:83602582-83725021   | 0.0504   | 0.0111  | -2.1894  | 0.401867 |
| Gm15569       | chr15:86185727-86187152   | 2.0279   | 0.2003  | -3.3397  | 0.334810 |
| Abcd2         | chr15:91145883-91191807   | 0.1420   | 0.0617  | -1.2026  | 0.552742 |
| Gm16537       | chr15:99715542-99724474   | 2.0750   | 0.3986  | -2.3803  | 0.379818 |
| Gm5475        | chr15:100422146-100428150 | 0.2609   | 0.0762  | -1.7757  | 0.338203 |
| Gm26372       | chr14:21263623-21263859   | 2.9674   | 0.0561  | -5.7254  | 0.293902 |
| Gm15667       | chr14:30804378-30805160   | 1.3254   | 0.4544  | -1.5446  | 0.482211 |
| Ogdhl         | chr14:32322018-32347820   | 0.1687   | 0.0296  | -2.5126  | 0.349580 |
| Trav7n-4      | chr14:53091345-53091875   | 1.4652   | 0.8678  | -0.7557  | 0.527504 |
| Trav9n-4      | chr14:53294595-53295030   | 2.3069   | 0.3110  | -2.8910  | 0.356307 |
| Trav6-5       | chr14:53491114-53491620   | 2.6285   | 0.2099  | -3.6465  | 0.323252 |
| B230359F08Rik | chr14:53795359-53797832   | 0.4881   | 0.3720  | -0.3918  | 0.748457 |
| Trdv2-2       | chr14:53960992-53961599   | 2.2743   | 0.8703  | -1.3859  | 0.121558 |
| Traj19        | chr14:54200385-54200446   | 118.3892 | 75.8268 | -0.6428  | 0.439646 |
| Gm5801        | chr14:56010535-56011351   | 0.6883   | 0.6256  | -0.1380  | 0.898234 |
| Parp4         | chr14:56575618-56659794   | 13.2294  | 12.4522 | -0.0873  | 0.810198 |
| Gjb6          | chr14:57123302-57133611   | 0.2953   | 0.0332  | -3.1508  | 0.102126 |
| lft88os       | chr14:57506743-57510835   | 0.2483   | 0.1335  | -0.8955  | 0.388296 |
| Gm26225       | chr14:64753917-64754052   | 6.3812   | 1.5765  | -2.0171  | 0.230089 |
| Mir19b-1      | chr14:115044304-115044391 | 10.2326  | 0.9346  | -3.4527  | 0.170973 |
| Gm15946       | chr17:12962767-12963193   | 1.5782   | 0.1793  | -3.1374  | 0.340025 |
| Lix1          | chr17:17402671-17459387   | 0.2530   | 0.0274  | -3.2083  | 0.337292 |
| Prss32        | chr17:23843854-23859776   | 0.4127   | 0.0613  | -2.7508  | 0.359620 |
| Ntn3          | chr17:24203847-24209387   | 0.1546   | 0.0406  | -1.9307  | 0.431782 |
| 1700022N22Rik | chr17:25985814-25988469   | 1.9399   | 0.6563  | -1.5636  | 0.381900 |
| Trp53cor1     | chr17:29057473-29078961   | 0.2127   | 0.0831  | -1.3566  | 0.234831 |
| Tmem217       | chr17:29526032-29549593   | 1.0051   | 0.2542  | -1.9834  | 0.196693 |
| Umodl1        | chr17:30954678-31010708   | 0.1431   | 0.0001  | -10.4832 | 0.266518 |
| Gm17276       | chr17:32113428-32141839   | 0.3324   | 0.0048  | -6.0988  | 0.291840 |
| Notch3        | chr17:32120819-32166880   | 0.1363   | 0.0103  | -3.7207  | 0.216646 |
| Cyp4f37       | chr17:32621318-32636184   | 0.1485   | 0.0001  | -10.5366 | 0.285591 |
| Gm4134        | chr17:33861301-33864228   | 1.6917   | 0.0001  | -14.0462 | 0.285591 |
| Gm4152        | chr17:33980485-33980744   | 2.0860   | 1.1923  | -0.8070  | 0.607606 |
| Gm17782       | chr17:36156530-36162079   | 1.0203   | 0.3136  | -1.7019  | 0.417934 |
| Pla2g7        | chr17:43568097-43612201   | 0.0965   | 0.0214  | -2.1705  | 0.406245 |
| Stap2         | chr17:55997080-56005570   | 0.3812   | 0.0308  | -3.6309  | 0.247717 |
| 1700061G19Rik | chr17:56875476-56888904   | 0.1723   | 0.1041  | -0.7264  | 0.475765 |
| Slc25a23      | chr17:57043710-57059863   | 1.0233   | 0.5540  | -0.8853  | 0.318669 |
| AU021092      | chr16:5211827-5222299     | 0.7440   | 0.0963  | -2.9498  | 0.134780 |
| Gm10247       | chr16:8922056-8922389     | 1.0095   | 0.1300  | -2.9569  | 0.346238 |
| Gm21859       | chr16:10912011-10914797   | 0.7774   | 0.0001  | -12.9245 | 0.285591 |
| Gm6305        | chr16:11190253-11191265   | 0.3402   | 0.2847  | -0.2568  | 0.850772 |
| Cebpd         | chr16:15887285-15888466   | 0.5054   | 0.3828  | -0.4008  | 0.750040 |
| Lrrc74b       | chr16:17544464-17561247   | 0.0854   | 0.0583  | -0.5507  | 0.742233 |
| Gm7873        | chr16:18218169-18219313   | 1.1251   | 0.2817  | -1.9975  | 0.422723 |



|               |                          |          |          |          |          |
|---------------|--------------------------|----------|----------|----------|----------|
| Tbx1          | chr16:18581712-18586969  | 0.2365   | 0.0184   | -3.6843  | 0.322971 |
| Cyp2ab1       | chr16:20308386-20323065  | 0.1005   | 0.0087   | -3.5282  | 0.327535 |
| Gm6493        | chr16:23014207-23017038  | 0.3765   | 0.2348   | -0.6810  | 0.691688 |
| Gm26834       | chr16:29811057-29837814  | 0.3539   | 0.1285   | -1.4618  | 0.514915 |
| Gm15703       | chr16:31924988-31925868  | 0.8193   | 0.0786   | -3.3810  | 0.285631 |
| Gm15696       | chr16:31970361-31970806  | 0.9804   | 0.9097   | -0.1080  | 0.928555 |
| BC002163      | chr16:42955559-42956062  | 1.6018   | 0.5749   | -1.4782  | 0.472742 |
| Tmprss7       | chr16:45656314-45693658  | 0.2667   | 0.0063   | -5.4061  | 0.295890 |
| Rps19-ps12    | chr16:79914459-79914889  | 1.7208   | 0.7503   | -1.1975  | 0.403787 |
| Gm22933       | chr16:90953794-90953868  | 7.0989   | 5.0085   | -0.5032  | 0.593446 |
| Gm15964       | chr16:91611467-91623861  | 17.1876  | 14.2737  | -0.2680  | 0.400717 |
| Tcirg1        | chr19:3896049-3907133    | 15.8364  | 16.3547  | 0.0465   | 0.844676 |
| Eif1ad        | chr19:5366812-5371511    | 24.4124  | 25.5199  | 0.0640   | 0.796592 |
| Ovol1         | chr19:5549136-5560575    | 0.2888   | 0.0225   | -3.6803  | 0.236604 |
| Gm25822       | chr19:8888537-8888685    | 16.0263  | 28.0366  | 0.8069   | 0.437016 |
| Mta2          | chr19:8941874-8952303    | 94.0835  | 88.3589  | -0.0906  | 0.403685 |
| Ppp1r32       | chr19:10474256-10482897  | 0.5043   | 0.1730   | -1.5438  | 0.242871 |
| Gm6365        | chr19:11877614-11878358  | 0.9530   | 0.2259   | -2.0769  | 0.229295 |
| Rpl9-ps6      | chr19:32465884-32466575  | 0.5387   | 0.0682   | -2.9824  | 0.227397 |
| Gm23300       | chr19:38071928-38072053  | 6.4987   | 0.1058   | -5.9407  | 0.292725 |
| Erlin1        | chr19:44034943-44069785  | 2.4466   | 1.8375   | -0.4130  | 0.515493 |
| Gm25482       | chr19:44945021-44945128  | 2.8798   | 2.0298   | -0.5046  | 0.775972 |
| Rgs20         | chr1:4909575-5070285     | 0.2172   | 0.0449   | -2.2734  | 0.250539 |
| Gm23126       | chr1:42866684-42866818   | 2.9095   | 1.3250   | -1.1348  | 0.479325 |
| Mstn          | chr1:53061662-53068079   | 0.1254   | 0.0812   | -0.6267  | 0.703897 |
| NA            | chr1:55443732-55445064   | 0.6647   | 0.0492   | -3.7567  | 0.321061 |
| Snord70       | chr1:59691933-59692020   | 7.6983   | 4.4500   | -0.7907  | 0.545102 |
| Gm11576       | chr1:60537019-60537436   | 0.8734   | 0.6346   | -0.4607  | 0.790124 |
| Pard3bos1     | chr1:61767414-61851540   | 0.5931   | 0.0001   | -12.5340 | 0.285591 |
| Gm13748       | chr1:64078653-64090782   | 1.9128   | 0.6669   | -1.5202  | 0.397172 |
| Gm25939       | chr1:72255007-72255198   | 19.0786  | 49.5729  | 1.3776   | 0.371522 |
| Ptprn         | chr1:75247040-75264208   | 0.1012   | 0.0398   | -1.3477  | 0.503003 |
| Gm2619        | chr1:85308658-85327306   | 1.3975   | 0.3339   | -2.0654  | 0.180636 |
| Twist2        | chr1:91801460-91848028   | 0.2319   | 0.0397   | -2.5452  | 0.379715 |
| Zcchc2        | chr1:105990405-106034074 | 16.5845  | 13.6385  | -0.2822  | 0.389015 |
| Mir128-1      | chr1:128202354-128202436 | 7.3697   | 0.1984   | -5.2151  | 0.161018 |
| Pfkfb2        | chr1:130689042-130729253 | 4.6230   | 3.8811   | -0.2524  | 0.443432 |
| AA986860      | chr1:130731975-130744621 | 0.1928   | 0.1777   | -0.1173  | 0.945312 |
| Ptprv         | chr1:135108496-135132594 | 6.5459   | 7.0462   | 0.1063   | 0.786398 |
| Mroh3         | chr1:136181473-136207097 | 0.1217   | 0.0753   | -0.6925  | 0.705285 |
| 2810025M15Rik | chr1:157412351-157420235 | 0.4671   | 0.0001   | -12.1896 | 0.160910 |
| Gm16548       | chr1:164148590-164152217 | 0.6801   | 0.0819   | -3.0534  | 0.325044 |
| Fcgr2b        | chr1:170960557-170976547 | 0.2403   | 0.1062   | -1.1774  | 0.565346 |
| Rpl27-ps1     | chr1:171305083-171305494 | 1.8403   | 0.6829   | -1.4302  | 0.498464 |
| B930036N10Rik | chr1:171500567-171504111 | 3.5816   | 4.3497   | 0.2803   | 0.703366 |
| Casq1         | chr1:172209893-172219868 | 0.4412   | 0.0505   | -3.1257  | 0.096531 |
| Gm10517       | chr1:182408618-182409020 | 1.6262   | 0.7664   | -1.0852  | 0.426528 |
| Ush2a         | chr1:188262022-188965041 | 0.0373   | 0.0039   | -3.2742  | 0.336084 |
| Spata45       | chr1:191036821-191042941 | 1.3090   | 0.0645   | -4.3422  | 0.308355 |
| Mir1b         | chr18:10785445-10785567  | 8.0361   | 2.0265   | -1.9875  | 0.420799 |
| 2310026I22Rik | chr18:32915825-32939222  | 0.3233   | 0.0353   | -3.1960  | 0.337860 |
| Snora74a      | chr18:35557031-35557227  | 417.9540 | 624.6734 | 0.5798   | 0.315752 |
| Gm15334       | chr18:38993634-38994192  | 0.9482   | 1.3544   | 0.5144   | 0.683523 |
| Rps19-ps4     | chr18:42252397-42252835  | 1.2417   | 0.6829   | -0.8625  | 0.487856 |
| Gm6960        | chr18:60426291-60426934  | 0.4823   | 0.7161   | 0.5702   | 0.805959 |
| 4930465K10Rik | chr18:77714209-77715449  | 0.3847   | 0.2397   | -0.6825  | 0.708621 |
| Gm13219       | chr2:9352430-9447676     | 0.1142   | 0.0208   | -2.4594  | 0.377409 |
| Gm22072       | chr2:10465286-10465407   | 5.0664   | 0.0001   | -15.6287 | 0.032185 |
| Gm26156       | chr2:10499203-10499326   | 5.4657   | 1.1721   | -2.2213  | 0.394250 |
| Gm17490       | chr2:11625605-11626264   | 20.8975  | 0.2098   | -6.6379  | 0.289948 |
| Gm13321       | chr2:12421624-12422023   | 1.6148   | 0.1009   | -4.0005  | 0.314043 |
| Gm25518       | chr2:25006151-25006258   | 3.6651   | 0.0001   | -15.1616 | 0.285591 |
| Ptgsd         | chr2:25466708-25470046   | 0.2889   | 0.1650   | -0.8079  | 0.663930 |
| C8g           | chr2:25498650-25501719   | 3.4668   | 1.6617   | -1.0610  | 0.348501 |
| Ak8           | chr2:28700163-28813165   | 0.7175   | 0.0620   | -3.5323  | 0.312187 |
| Gm24976       | chr2:29459193-29459328   | 5.1874   | 0.0001   | -15.6627 | 0.285591 |
| Ptges         | chr2:30889470-30929863   | 0.0785   | 0.0001   | -9.6162  | 0.285591 |
| Mir2861       | chr2:32712806-32712888   | 8.1985   | 4.5220   | -0.8584  | 0.633179 |
| Lhx2          | chr2:38339280-38369733   | 0.2236   | 0.0209   | -3.4178  | 0.271513 |
| Gm13586       | chr2:38622800-38623264   | 0.8453   | 0.9137   | 0.1123   | 0.938529 |
| Gm13496       | chr2:38996712-38998258   | 0.3430   | 0.4218   | 0.2986   | 0.804810 |

|               |                          |         |         |          |          |
|---------------|--------------------------|---------|---------|----------|----------|
| Gm13453       | chr2:40127503-40127860   | 2.1038  | 1.0782  | -0.9644  | 0.529806 |
| Gm13472       | chr2:48388036-48388350   | 2.6763  | 1.0128  | -1.4019  | 0.518015 |
| Gm13487       | chr2:50522123-50522987   | 0.6809  | 0.1624  | -2.0677  | 0.418607 |
| Gm25966       | chr2:61798179-61798296   | 6.4380  | 1.7374  | -1.8897  | 0.337532 |
| Abcb11        | chr2:69238281-69342616   | 0.2723  | 0.0078  | -5.1248  | 0.298249 |
| Gad1          | chr2:70553071-70602014   | 0.1085  | 0.0145  | -2.9070  | 0.106067 |
| Gm11084       | chr2:72971547-72986716   | 8.7016  | 7.4336  | -0.2272  | 0.782518 |
| Gm22606       | chr2:79348364-79348467   | 8.1587  | 1.0855  | -2.9099  | 0.351062 |
| Smtnl1        | chr2:84811175-84822652   | 0.8865  | 0.0304  | -4.8641  | 0.186481 |
| 4930443O20Rik | chr2:85073613-85086461   | 1.0124  | 0.0646  | -3.9701  | 0.198853 |
| Bdnf          | chr2:109674699-109727007 | 0.1351  | 0.0001  | -10.4003 | 0.264663 |
| Gm21985       | chr2:112266313-112406319 | 44.2209 | 39.8149 | -0.1514  | 0.305043 |
| n-R5s202      | chr2:112469252-112469366 | 5.8166  | 2.5945  | -1.1647  | 0.354116 |
| Fmn1          | chr2:113327735-113716767 | 0.0288  | 0.0197  | -0.5469  | 0.762230 |
| Exd1          | chr2:119516504-119547627 | 0.0500  | 0.0326  | -0.6185  | 0.712437 |
| Gm22865       | chr2:121004088-121004301 | 9.4382  | 0.1242  | -6.2481  | 0.078750 |
| Gm14018       | chr2:121485431-121491512 | 1.1552  | 0.5956  | -0.9558  | 0.620408 |
| Gm14057       | chr2:130803500-130803982 | 1.7412  | 0.7003  | -1.3141  | 0.273043 |
| Gfra4         | chr2:131039631-131043088 | 0.3753  | 0.0123  | -4.9306  | 0.300240 |
| Gm14052       | chr2:132099868-132100899 | 0.8929  | 0.1440  | -2.6321  | 0.231744 |
| Gm14051       | chr2:132144532-132220250 | 0.8174  | 0.4773  | -0.7763  | 0.676089 |
| lsm1          | chr2:139678177-139758581 | 0.1428  | 0.0201  | -2.8273  | 0.354205 |
| Gm14117       | chr2:146305546-146306389 | 0.9485  | 0.3469  | -1.4511  | 0.273626 |
| Nkx2-4        | chr2:147083315-147085445 | 0.2924  | 0.0190  | -3.9474  | 0.316134 |
| Gm14252       | chr2:156332316-156339381 | 0.1484  | 0.1788  | 0.2691   | 0.812948 |
| Gm14200       | chr2:158468168-158468360 | 2.6680  | 1.6892  | -0.6594  | 0.644105 |
| Mir3474       | chr2:158638582-158638640 | 7.7274  | 8.5384  | 0.1440   | 0.926841 |
| Sgk2          | chr2:162987329-163014127 | 0.0986  | 0.0135  | -2.8684  | 0.352768 |
| Jph2          | chr2:163336241-163397993 | 0.1252  | 0.0063  | -4.3101  | 0.308567 |
| A530013C23Rik | chr2:167691176-167729172 | 0.1034  | 0.0824  | -0.3275  | 0.858083 |
| Vmn1r-ps1     | chr2:174591229-174591802 | 1.8165  | 0.2059  | -3.1415  | 0.134426 |
| Gm12540       | chr3:37327071-37327390   | 1.4929  | 0.0829  | -4.1698  | 0.311506 |
| Gpr87         | chr3:59179005-59180085   | 0.4929  | 0.3068  | -0.6841  | 0.713328 |
| Slc33a1       | chr3:63933506-63964768   | 11.5622 | 12.4488 | 0.1066   | 0.799842 |
| Paqr6         | chr3:88364583-88368541   | 0.1500  | 0.0336  | -2.1598  | 0.416538 |
| Gm25945       | chr3:88707157-88707292   | 6.3252  | 1.5174  | -2.0595  | 0.148270 |
| n-R5s197      | chr3:88906509-88906628   | 2.3540  | 0.9396  | -1.3250  | 0.531583 |
| Rab13         | chr3:90213694-90226385   | 0.5939  | 0.1596  | -1.8961  | 0.432276 |
| S100a2        | chr3:90590246-90591508   | 1.4229  | 1.4716  | 0.0485   | 0.974072 |
| Rriad1        | chr3:94464984-94473591   | 0.5800  | 0.0843  | -2.7830  | 0.362829 |
| Hormad1       | chr3:95559676-95587671   | 0.3960  | 0.0154  | -4.6858  | 0.072366 |
| Gm26361       | chr3:95796698-95796884   | 3.0269  | 0.8743  | -1.7916  | 0.296740 |
| Hist2h3c2     | chr3:96238109-96239127   | 1.8306  | 0.3819  | -2.2611  | 0.375871 |
| NA            | chr3:103324232-103324303 | 5.1289  | 8.3994  | 0.7116   | 0.724907 |
| I830077J02Rik | chr3:105925890-105932664 | 0.2321  | 0.4487  | 0.9509   | 0.321070 |
| Aknad1        | chr3:108739657-108782296 | 0.0489  | 0.0001  | -8.9343  | 0.285591 |
| Mir302a       | chr3:127545495-127545564 | 5.5871  | 1.6497  | -1.1599  | 0.441728 |
| Mir302d       | chr3:127545623-127545689 | 4.6687  | 0.4928  | -3.2438  | 0.338732 |
| Gm11804       | chr4:7039046-7039514     | 1.3198  | 0.5326  | -1.3091  | 0.443118 |
| Triqk         | chr4:12906837-12981471   | 0.2452  | 0.0001  | -11.2595 | 0.285591 |
| Klh132        | chr4:24612553-24851124   | 0.0768  | 0.0643  | -0.2559  | 0.777296 |
| Pm20d2        | chr4:33174229-33189737   | 0.1528  | 0.0394  | -1.9540  | 0.425104 |
| Gm22849       | chr4:34683878-34684185   | 2.7852  | 0.6192  | -2.1694  | 0.369867 |
| Gm12396       | chr4:40775132-40775725   | 1.8658  | 0.5234  | -1.8338  | 0.394376 |
| Gm25931       | chr4:40850319-40850402   | 12.0860 | 0.8397  | -3.8473  | 0.246019 |
| Gm12403       | chr4:41168645-41169604   | 0.4967  | 0.4772  | -0.0575  | 0.966658 |
| n-R5s183      | chr4:41303157-41303272   | 26.8771 | 1.8869  | -3.8323  | 0.178189 |
| Npr2          | chr4:43631934-43651244   | 0.1441  | 0.0824  | -0.8076  | 0.675331 |
| Gm24560       | chr4:46195378-46195486   | 4.9280  | 0.4895  | -3.3317  | 0.335140 |
| Gm22300       | chr4:56913641-56913767   | 5.1771  | 1.9887  | -1.3803  | 0.447381 |
| Svep1         | chr4:58042441-58206859   | 0.0505  | 0.0022  | -4.5218  | 0.304115 |
| A1481877      | chr4:59043752-59138983   | 0.1439  | 0.0233  | -2.6260  | 0.128291 |
| Gm12542       | chr4:59889985-59894924   | 0.5526  | 1.0294  | 0.8974   | 0.450044 |
| Rnf183        | chr4:62427539-62435252   | 0.2907  | 0.3689  | 0.3437   | 0.709662 |
| Orm1          | chr4:63344559-63348163   | 1.1928  | 0.2468  | -2.2729  | 0.390395 |
| C630043F03Rik | chr4:72201347-72215352   | 0.1303  | 0.0359  | -1.8587  | 0.456129 |
| NA            | chr4:86930690-86934820   | 0.2668  | 0.0553  | -2.2706  | 0.389834 |
| Cdkn2a        | chr4:89274472-89294653   | 0.7970  | 0.1774  | -2.1676  | 0.350676 |
| Gm830         | chr4:95464723-95487394   | 0.1201  | 0.0001  | -10.2298 | 0.285591 |
| Gm12788       | chr4:98352426-98352734   | 1.1824  | 0.3103  | -1.9300  | 0.436116 |
| Dock7         | chr4:98936664-99120915   | 0.0995  | 0.0237  | -2.0726  | 0.177275 |

|               |                           |          |          |          |          |
|---------------|---------------------------|----------|----------|----------|----------|
| BC055111      | chr4:106590908-106617241  | 0.2345   | 0.0837   | -1.4870  | 0.484163 |
| Gm24967       | chr4:108466943-108467050  | 9.9481   | 4.8763   | -1.0286  | 0.600638 |
| Lurap1        | chr4:116132405-116151338  | 1.8959   | 1.3930   | -0.4447  | 0.535928 |
| Pik3r3        | chr4:116221617-116303056  | 2.7965   | 1.8775   | -0.5748  | 0.314949 |
| Gm25099       | chr4:117189941-117190057  | 20.7467  | 49.8201  | 1.2638   | 0.381728 |
| Gm12844       | chr4:117728717-117729299  | 0.9146   | 0.0797   | -3.5209  | 0.326401 |
| Mir1957a      | chr4:119129778-119129844  | 13.4005  | 1.1396   | -3.5557  | 0.228015 |
| Ybx1          | chr4:119277980-119294604  | 101.8391 | 111.6224 | 0.1323   | 0.616660 |
| Gm12924       | chr4:123435616-123435934  | 2.2571   | 0.4977   | -2.1811  | 0.193427 |
| Mir697        | chr4:124731693-124731802  | 13.1063  | 0.7258   | -4.1745  | 0.310658 |
| Epha10        | chr4:124880898-124917800  | 0.0779   | 0.0149   | -2.3902  | 0.388051 |
| Gm12933       | chr4:126665253-126666125  | 0.8681   | 0.0727   | -3.5782  | 0.219827 |
| Gm12941       | chr4:127046382-127046602  | 11.1388  | 5.8448   | -0.9304  | 0.497879 |
| NA            | chr4:129219456-129219544  | 7.3212   | 1.4437   | -2.3423  | 0.393794 |
| Gm24762       | chr4:132547103-132547207  | 7.2723   | 1.0458   | -2.7978  | 0.358995 |
| Ahdc1         | chr4:133011259-133078110  | 4.0679   | 2.7325   | -0.5741  | 0.365064 |
| Syf2          | chr4:134930897-134937548  | 48.3132  | 62.1971  | 0.3644   | 0.068430 |
| Gm12987       | chr4:136584171-136584660  | 1.5416   | 0.4514   | -1.7720  | 0.233887 |
| Gm21969       | chr4:139603185-139662691  | 8.9226   | 6.6835   | -0.4169  | 0.258454 |
| Gm13146       | chr4:147187707-147188487  | 1.3359   | 0.0693   | -4.2680  | 0.109832 |
| Gm23209       | chr4:150321192-150321302  | 4.8315   | 0.0001   | -15.5602 | 0.252433 |
| 5830444B04Rik | chr4:155398762-155421704  | 1.8303   | 0.3410   | -2.4242  | 0.349539 |
| Gm16074       | chr10:3992370-3992814     | 1.8276   | 0.5422   | -1.7529  | 0.446733 |
| Ccdc170       | chr10:4482501-4562231     | 0.0564   | 0.0529   | -0.0927  | 0.955704 |
| NA            | chr10:7792522-7792822     | 0.7830   | 2.0995   | 1.4229   | 0.432557 |
| Enpp3         | chr10:24773813-24836195   | 0.0987   | 0.0189   | -2.3867  | 0.393003 |
| Gm23757       | chr10:26357946-26358046   | 2.1354   | 0.0001   | -14.3822 | 0.285591 |
| Tpd52l1       | chr10:31332379-31445921   | 0.2529   | 0.0386   | -2.7118  | 0.367421 |
| Fam229b       | chr10:39118803-39133914   | 0.0770   | 0.1215   | 0.6579   | 0.613352 |
| BC021785      | chr10:39958060-39986646   | 0.0391   | 0.1319   | 1.7557   | 0.509795 |
| Rps19-ps10    | chr10:52384658-52385093   | 0.8634   | 0.3001   | -1.5245  | 0.367384 |
| Pkib          | chr10:57631980-57741112   | 0.0236   | 0.0543   | 1.2018   | 0.430082 |
| Gm17148       | chr10:59708789-59709038   | 0.9434   | 0.9690   | 0.0386   | 0.982463 |
| Gm17059       | chr10:59799198-59800254   | 0.4938   | 0.9587   | 0.9572   | 0.613202 |
| Gm7399        | chr10:59806556-59807414   | 0.5476   | 0.0309   | -4.1475  | 0.311892 |
| Gm22803       | chr10:62919558-62919841   | 0.7546   | 0.3678   | -1.0368  | 0.615074 |
| Gm9923        | chr10:72309224-72311848   | 0.1303   | 0.2482   | 0.9297   | 0.399795 |
| Gm15398       | chr10:73201398-73327027   | 1.2280   | 0.3173   | -1.9522  | 0.212354 |
| Rab36         | chr10:75037057-75054748   | 0.0865   | 0.0696   | -0.3153  | 0.852823 |
| Gm16106       | chr10:81504472-81504766   | 0.9443   | 1.5697   | 0.7332   | 0.486049 |
| Slc41a2       | chr10:83230847-83337882   | 0.0520   | 0.0698   | 0.4255   | 0.772559 |
| Syn3          | chr10:86055124-86498896   | 0.0243   | 0.0530   | 1.1245   | 0.398922 |
| Mir1931       | chr10:93162784-93162903   | 5.1548   | 3.0412   | -0.7613  | 0.453560 |
| Mir331        | chr10:93963767-93963863   | 2.2243   | 4.3447   | 0.9659   | 0.703825 |
| NA            | chr10:95792570-95794980   | 0.1703   | 0.1682   | -0.0178  | 0.991216 |
| Cyp27b1       | chr10:127048249-127053006 | 0.2490   | 0.1480   | -0.7504  | 0.677112 |
| Gm4189        | chr10:127289695-127290788 | 1.2131   | 0.7912   | -0.6165  | 0.542646 |
| Gm16230       | chr10:127671603-127676724 | 1.3037   | 0.5288   | -1.3019  | 0.317701 |
| Mip           | chr10:128225837-128231812 | 0.1722   | 0.2809   | 0.7061   | 0.536824 |
| Slc39a5       | chr10:128395933-128401224 | 0.1696   | 0.2667   | 0.6526   | 0.538711 |
| Gm26393       | chr11:3656662-3656791     | 4.3038   | 2.4105   | -0.8362  | 0.648015 |
| Gm11956       | chr11:4230753-4231265     | 0.8874   | 1.1480   | 0.3714   | 0.805736 |
| Gm11401       | chr11:6242377-6242721     | 1.2587   | 0.8362   | -0.5900  | 0.728331 |
| Upp1          | chr11:9118102-9136170     | 0.2179   | 0.1406   | -0.6324  | 0.722876 |
| Cobl          | chr11:12236607-12464960   | 0.0552   | 0.0309   | -0.8378  | 0.655267 |
| Rpsa-ps3      | chr11:22386291-22388196   | 0.3414   | 0.0894   | -1.9324  | 0.435761 |
| 4930524B15Rik | chr11:31965591-31979651   | 0.2350   | 0.1969   | -0.2554  | 0.896173 |
| Gm12148       | chr11:43385481-43387183   | 0.8776   | 0.0001   | -13.0994 | 0.285591 |
| Gm22121       | chr11:44469012-44469066   | 4.7452   | 7.7543   | 0.7085   | 0.679429 |
| Sox30         | chr11:45980309-46017994   | 0.1355   | 0.0881   | -0.6205  | 0.712751 |
| Gm12166       | chr11:46051353-46052321   | 0.5032   | 0.1492   | -1.7539  | 0.191682 |
| Olfr1396      | chr11:49112776-49114874   | 0.1992   | 0.0725   | -1.4588  | 0.500373 |
| Rasgef1c      | chr11:49901834-49980994   | 0.1276   | 0.0286   | -2.1563  | 0.364102 |
| Zfp879        | chr11:50832030-50841552   | 0.7938   | 0.0123   | -6.0109  | 0.169995 |
| Rpl9-ps3      | chr11:53501183-53501762   | 0.5164   | 0.3719   | -0.4735  | 0.797399 |
| Csf2          | chr11:54247270-54249667   | 1.2546   | 0.7323   | -0.7767  | 0.663796 |
| Gm12246       | chr11:58126067-58128512   | 1.0614   | 0.7497   | -0.5015  | 0.773489 |
| Gm12251       | chr11:58392768-58393563   | 0.3845   | 0.4962   | 0.3679   | 0.788434 |
| Fam183b       | chr11:58792796-58801960   | 0.6026   | 0.2713   | -1.1517  | 0.550961 |
| Olfr311       | chr11:58841115-58842042   | 0.2535   | 0.0001   | -11.3076 | 0.285591 |
| Gm12279       | chr11:62550046-62551041   | 0.8716   | 1.8873   | 1.1145   | 0.437221 |

|               |                           |         |        |          |          |
|---------------|---------------------------|---------|--------|----------|----------|
| Mir744        | chr11:65734732-65734832   | 6.1042  | 0.1322 | -5.5287  | 0.074333 |
| Kcnab3os      | chr11:69329824-69332122   | 0.4151  | 0.4167 | 0.0056   | 0.997296 |
| Slc35g3       | chr11:69759889-69761968   | 0.1849  | 0.0636 | -1.5387  | 0.475751 |
| Cldn7         | chr11:69964778-69967885   | 0.1316  | 0.2267 | 0.7844   | 0.486601 |
| Gm10418       | chr11:70540022-70540600   | 0.7658  | 0.2559 | -1.5811  | 0.251088 |
| Inca1         | chr11:70688360-70700155   | 0.1552  | 0.3380 | 1.1231   | 0.457072 |
| Gm22771       | chr11:74906108-74906199   | 3.2851  | 7.5629 | 1.2030   | 0.600207 |
| Rilp          | chr11:75510093-75513168   | 0.6267  | 0.0970 | -2.6909  | 0.191826 |
| Gm11193       | chr11:78292847-78293956   | 1.3695  | 0.5155 | -1.4096  | 0.512678 |
| D11Bhm181e    | chr11:78561318-78561600   | 1.2116  | 0.2920 | -2.0527  | 0.420003 |
| Gm11198       | chr11:79371256-79372230   | 0.6442  | 0.1457 | -2.1441  | 0.254214 |
| Rab11fip4os1  | chr11:79607078-79623163   | 0.5389  | 0.0284 | -4.2436  | 0.199443 |
| Gm23765       | chr11:85493758-85493905   | 1.4527  | 0.4495 | -1.6922  | 0.483615 |
| Gm25427       | chr11:86333205-86333308   | 3.7317  | 4.2919 | 0.2018   | 0.883369 |
| Tex14         | chr11:87405064-87555823   | 0.0597  | 0.1486 | 1.3156   | 0.424477 |
| Rnu1a1        | chr11:87422866-87423030   | 3.4617  | 2.7639 | -0.3248  | 0.825885 |
| Gm11520       | chr11:95310428-95324496   | 0.4746  | 0.1679 | -1.4992  | 0.520324 |
| Gm11522       | chr11:95462545-95462721   | 1.8199  | 0.3523 | -2.3688  | 0.388272 |
| 1700001P01Rik | chr11:97771480-97775918   | 0.3423  | 0.6625 | 0.9528   | 0.604781 |
| Stac2         | chr11:98036622-98053462   | 0.0681  | 0.0127 | -2.4201  | 0.389704 |
| Gm22059       | chr11:98710985-98711089   | 2.0533  | 3.7459 | 0.8674   | 0.535295 |
| Tns4          | chr11:99065677-99089306   | 0.1365  | 0.0154 | -3.1436  | 0.342809 |
| Arhgap27os1   | chr11:103363212-103364651 | 0.6383  | 0.2862 | -1.1572  | 0.279781 |
| Gm11708       | chr11:107003908-107004740 | 0.3081  | 0.1846 | -0.7393  | 0.697097 |
| Gm16487       | chr11:113467976-113472014 | 0.0800  | 0.0355 | -1.1710  | 0.326463 |
| Cd300lb       | chr11:114922780-114934386 | 0.0953  | 0.1894 | 0.9913   | 0.548325 |
| Gm11694       | chr11:115493023-115493182 | 3.1726  | 0.3745 | -3.0828  | 0.266085 |
| Gm11703       | chr11:115724325-115724808 | 1.0660  | 0.6177 | -0.7872  | 0.383611 |
| Aanat         | chr11:116586431-116597680 | 0.1413  | 0.1186 | -0.2535  | 0.865750 |
| Snord1b       | chr11:116674147-116674222 | 8.9145  | 3.6466 | -1.2896  | 0.338566 |
| Gm11738       | chr11:118114854-118118279 | 0.0990  | 0.1897 | 0.9372   | 0.536246 |
| 2810410L24Rik | chr11:120185399-120189852 | 0.0777  | 0.1645 | 1.0831   | 0.643586 |
| Ppp1r27       | chr11:120549978-120551132 | 0.2770  | 0.6027 | 1.1214   | 0.405132 |
| Rab40b        | chr11:121356124-121388251 | 0.1171  | 0.3457 | 1.5622   | 0.173577 |
| Sdc1          | chr12:8771322-8793715     | 0.1346  | 0.1502 | 0.1576   | 0.899049 |
| Gm6736        | chr12:13455019-13455970   | 0.2471  | 0.1850 | -0.4177  | 0.808270 |
| NA            | chr12:21273303-21273532   | 2.8007  | 1.2506 | -1.1631  | 0.333989 |
| Gm22663       | chr12:51740240-51740342   | 3.0464  | 5.9124 | 0.9566   | 0.502912 |
| Tom20l        | chr12:71111427-71123222   | 1.3615  | 0.2286 | -2.5745  | 0.371068 |
| Dact1         | chr12:71309883-71320107   | 0.0682  | 0.1146 | 0.7487   | 0.669482 |
| Fam71d        | chr12:78691534-78734513   | 0.2282  | 0.2322 | 0.0249   | 0.987503 |
| Scarna3b      | chr12:80391612-80391751   | 2.3044  | 4.2341 | 0.8777   | 0.592152 |
| Samd15        | chr12:87199722-87213541   | 0.1540  | 0.2520 | 0.7107   | 0.611006 |
| Gm20036       | chr12:101913239-101915335 | 0.5044  | 0.7397 | 0.5526   | 0.718326 |
| Bdkrb1        | chr12:105603084-105605428 | 0.4763  | 0.1665 | -1.5159  | 0.489924 |
| Mir342        | chr12:108658619-108658718 | 3.6667  | 0.8168 | -2.1664  | 0.399171 |
| A230065H16Rik | chr12:111406808-111412077 | 0.3251  | 0.0001 | -11.6667 | 0.285591 |
| Tdrd9         | chr12:111971558-112068854 | 0.0578  | 0.0330 | -0.8108  | 0.705016 |
| Ighg2b        | chr12:113306388-113307933 | 0.2327  | 0.0786 | -1.5657  | 0.506841 |
| Ighv1-47      | chr12:114991107-114991401 | 0.7990  | 0.9674 | 0.2759   | 0.866569 |
| Tubal3        | chr13:3924694-3935276     | 0.0898  | 0.0966 | 0.1496   | 0.926675 |
| Gm10357       | chr13:8289845-8290115     | 0.9491  | 1.3928 | 0.5534   | 0.747133 |
| Gm26601       | chr13:9387138-9391741     | 0.2197  | 0.0567 | -1.9534  | 0.230159 |
| Gm25483       | chr13:12589564-12589791   | 1.5051  | 0.4734 | -1.6688  | 0.464767 |
| Trgj1         | chr13:19210342-19210402   | 7.4736  | 2.2360 | -1.7409  | 0.453877 |
| Zfp184        | chr13:21945093-21960779   | 0.1460  | 0.0261 | -2.4816  | 0.377479 |
| Gm11281       | chr13:21953052-21953628   | 0.7838  | 1.0215 | 0.3822   | 0.607013 |
| 1700016G14Rik | chr13:24741231-24746592   | 0.2970  | 0.2345 | -0.3412  | 0.855377 |
| Gm11365       | chr13:29940282-29942261   | 1.2159  | 0.1104 | -3.4612  | 0.109436 |
| Gm11367       | chr13:30112473-30112596   | 1.9097  | 0.0001 | -14.2211 | 0.285591 |
| Fam217a       | chr13:34909963-34919992   | 0.3589  | 0.0952 | -1.9152  | 0.234093 |
| Dbn1          | chr13:55473428-55488111   | 0.0852  | 0.0501 | -0.7656  | 0.654777 |
| Gm3604        | chr13:62368862-62371936   | 2.6415  | 3.1962 | 0.2750   | 0.756223 |
| Gm10775       | chr13:65259538-65260826   | 1.0186  | 0.0601 | -4.0835  | 0.154052 |
| Slc6a19       | chr13:73679744-73704865   | 0.0556  | 0.0997 | 0.8438   | 0.492328 |
| Gm6263        | chr13:74018792-74020134   | 0.3183  | 0.0925 | -1.7831  | 0.454090 |
| Gm15740       | chr13:76696618-76697910   | 0.1984  | 0.3608 | 0.8627   | 0.648423 |
| Gm8399        | chr13:81064683-81065803   | 0.2594  | 0.4402 | 0.7631   | 0.526410 |
| Hapl1         | chr13:89540635-89611832   | 0.1268  | 0.0806 | -0.6536  | 0.719425 |
| Gm24498       | chr13:89927441-89927543   | 11.4204 | 0.7374 | -3.9530  | 0.139363 |
| Ckmt2         | chr13:91853386-91876885   | 0.1725  | 0.1947 | 0.1741   | 0.907602 |

|               |                           |        |        |          |          |
|---------------|---------------------------|--------|--------|----------|----------|
| Gm8756        | chr13:97458148-97459077   | 0.5287 | 0.2058 | -1.3615  | 0.532712 |
| Gm26619       | chr13:97751111-97760965   | 0.4641 | 0.5201 | 0.1645   | 0.829863 |
| Gm10260       | chr13:97760129-97760588   | 1.0847 | 1.2158 | 0.1645   | 0.829863 |
| Arhgef28      | chr13:97898594-98206165   | 0.0479 | 0.0591 | 0.3038   | 0.852837 |
| 1700099I09Rik | chr13:102760254-102761896 | 0.2896 | 0.6712 | 1.2125   | 0.371469 |
| Apoo-ps       | chr13:107413864-107414767 | 0.3312 | 0.1057 | -1.6473  | 0.471840 |
| Elovl7        | chr13:108214403-108287105 | 0.0433 | 0.1434 | 1.7272   | 0.158925 |
| Gm15327       | chr13:111809140-111811039 | 0.4828 | 0.6484 | 0.4255   | 0.756259 |
| Cdc20b        | chr13:113035110-113091195 | 0.1403 | 0.0090 | -3.9629  | 0.315593 |
| Fst           | chr13:114452261-114458730 | 0.1006 | 0.1474 | 0.5511   | 0.790286 |
| Mir3096       | chr5:23710990-23711061    | 8.3797 | 2.3307 | -1.8461  | 0.261282 |
| 4930548H24Rik | chr5:31485858-31488476    | 0.4035 | 0.1042 | -1.9538  | 0.426187 |
| Mir3097       | chr5:35021048-35021115    | 4.1432 | 0.9709 | -2.0934  | 0.424728 |
| Gm24878       | chr5:36666408-36666512    | 7.7032 | 2.2347 | -1.7854  | 0.233323 |
| Gm25551       | chr5:37092257-37092360    | 3.1097 | 3.6622 | 0.2359   | 0.884562 |
| Gm15796       | chr5:38507462-38507666    | 2.0504 | 1.9450 | -0.0761  | 0.948430 |
| Gm6044        | chr5:64320255-64320754    | 0.4708 | 0.7352 | 0.6431   | 0.680987 |
| Gm15981       | chr5:74316565-74317029    | 0.5523 | 0.3944 | -0.4860  | 0.788615 |
| Mir5098       | chr5:77272756-77272838    | 3.3853 | 4.0136 | 0.2456   | 0.899762 |
| Gm2199        | chr5:80900749-80901623    | 0.2933 | 0.4584 | 0.6445   | 0.695660 |
| Cxcl2         | chr5:90903898-90905909    | 0.2432 | 0.0464 | -2.3905  | 0.392987 |
| Btc           | chr5:91357260-91402994    | 0.1931 | 0.0231 | -3.0654  | 0.346672 |
| Gm5560        | chr5:97264827-97265719    | 0.2700 | 0.8550 | 1.6628   | 0.228864 |
| Gm24897       | chr5:103898878-103898985  | 2.1952 | 0.0001 | -14.4221 | 0.285591 |
| Spp1          | chr5:104435117-104441050  | 0.6627 | 5.3828 | 3.0219   | 0.242870 |
| Gm8258        | chr5:104775910-104776824  | 0.9811 | 0.1249 | -2.9736  | 0.112666 |
| Gm24097       | chr5:104936650-104936757  | 5.1956 | 0.3706 | -3.8095  | 0.083474 |
| Gm17304       | chr5:106609097-106609201  | 4.0231 | 6.4875 | 0.6894   | 0.665420 |
| Gm17202       | chr5:107404822-107431910  | 0.2920 | 0.2683 | -0.1218  | 0.942799 |
| Gm26387       | chr5:107907344-107907476  | 2.7501 | 4.4685 | 0.7003   | 0.605190 |
| Fgfr1         | chr5:108694228-108706950  | 0.1662 | 0.1689 | 0.0232   | 0.985743 |
| Gm15484       | chr5:110118021-110118849  | 0.4208 | 0.4262 | 0.0184   | 0.988313 |
| Gm15791       | chr5:110328203-110328522  | 0.6695 | 0.2072 | -1.6920  | 0.483615 |
| Mn1           | chr5:111417361-111457033  | 0.0339 | 0.0357 | 0.0727   | 0.971103 |
| Asphd2        | chr5:112385447-112392213  | 0.1484 | 0.2068 | 0.4787   | 0.711954 |
| Gm13830       | chr5:115301119-115319208  | 0.1253 | 0.1496 | 0.2564   | 0.890978 |
| 9530046B11Rik | chr5:117115217-117118723  | 0.5722 | 0.2834 | -1.0135  | 0.594133 |
| Gm15727       | chr5:117348906-117349344  | 0.7801 | 1.5483 | 0.9890   | 0.450893 |
| Gm24682       | chr5:123518230-123518367  | 1.5587 | 1.5514 | -0.0068  | 0.996492 |
| Tmem132b      | chr5:125532417-125792583  | 0.0269 | 0.0184 | -0.5524  | 0.794349 |
| Gm25315       | chr5:135207987-135208108  | 2.8236 | 1.3435 | -1.0715  | 0.596550 |
| Gm16061       | chr5:135698162-135699019  | 0.4237 | 0.7279 | 0.7808   | 0.525673 |
| Myl10         | chr5:136693145-136701094  | 0.3897 | 0.5065 | 0.3780   | 0.788335 |
| Gper1         | chr5:139423150-139427800  | 0.1516 | 0.0995 | -0.6076  | 0.699145 |
| 9530056K15Rik | chr5:143397247-143399563  | 0.1385 | 0.1429 | 0.0455   | 0.977896 |
| Rps10-ps4     | chr5:147100561-147101053  | 0.6511 | 0.8533 | 0.3902   | 0.750663 |
| Ft1           | chr5:147561603-147726011  | 0.0241 | 0.0183 | -0.3971  | 0.811899 |
| Gm26013       | chr5:150710845-150710964  | 2.6916 | 1.4123 | -0.9304  | 0.645478 |
| Gng11         | chr6:4003942-4008445      | 0.3398 | 0.0555 | -2.6133  | 0.374531 |
| Fam71f2       | chr6:29279592-29290680    | 0.4017 | 0.2008 | -1.0003  | 0.606538 |
| Tsga13        | chr6:30896980-30915573    | 0.1872 | 0.2896 | 0.6294   | 0.787678 |
| Mir29a        | chr6:31062659-31062747    | 5.1460 | 5.2017 | 0.0155   | 0.987069 |
| Clec2l        | chr6:38663068-38680864    | 0.2842 | 0.2297 | -0.3073  | 0.854598 |
| Sva           | chr6:42038393-42042851    | 3.0483 | 0.0001 | -14.8957 | 0.062389 |
| Hoxaas3       | chr6:52175216-52215076    | 0.1905 | 0.0399 | -2.2569  | 0.134205 |
| Fkbp9         | chr6:56832058-56879358    | 0.1032 | 0.0468 | -1.1395  | 0.557064 |
| Gm17147       | chr6:65128570-65129002    | 1.9313 | 0.2895 | -2.7380  | 0.175559 |
| Fabp1         | chr6:71199826-71205023    | 0.4635 | 0.0001 | -12.1782 | 0.285591 |
| Sftpb         | chr6:72304609-72314371    | 0.1554 | 0.0316 | -2.2978  | 0.334316 |
| Gm17034       | chr6:82764281-82767288    | 0.1342 | 0.2826 | 1.0745   | 0.438877 |
| Rtkn          | chr6:83135462-83152579    | 0.0597 | 0.1229 | 1.0424   | 0.522084 |
| Wdr54         | chr6:83149360-83156397    | 0.0554 | 0.0860 | 0.6345   | 0.653970 |
| Npm3-ps1      | chr6:85076191-85076719    | 1.0237 | 0.5366 | -0.9320  | 0.591143 |
| Rps19-ps9     | chr6:87948463-87948877    | 0.9961 | 0.4132 | -1.2697  | 0.481699 |
| Gm15531       | chr6:97890287-97890539    | 1.1281 | 0.1095 | -3.3643  | 0.268537 |
| Il17re        | chr6:113458483-113470751  | 0.1286 | 0.0990 | -0.3777  | 0.830165 |
| Fancd2os      | chr6:113596760-113600715  | 0.1886 | 0.3690 | 0.9678   | 0.495257 |
| Gm8213        | chr6:116195417-116195858  | 0.8232 | 0.3668 | -1.1661  | 0.550555 |
| Gm25953       | chr6:118429169-118429252  | 3.3445 | 2.4982 | -0.4209  | 0.819425 |
| Gm24592       | chr6:120381033-120381139  | 2.8203 | 3.3537 | 0.2499   | 0.860534 |
| Slc6a13       | chr6:121300226-121337733  | 0.1398 | 0.0415 | -1.7511  | 0.455924 |

|               |                          |        |        |          |          |
|---------------|--------------------------|--------|--------|----------|----------|
| Aicda         | chr6:122553800-122564180 | 0.1208 | 0.2085 | 0.7873   | 0.617469 |
| Gm4482        | chr6:122792580-122792775 | 1.4236 | 0.9122 | -0.6421  | 0.739692 |
| Gm10069       | chr6:128438756-128475617 | 0.1330 | 0.1177 | -0.1766  | 0.917226 |
| Klrb1a        | chr6:128609226-128622934 | 0.2012 | 0.0665 | -1.5967  | 0.473752 |
| Klre1         | chr6:129577892-129585824 | 0.2459 | 0.3331 | 0.4378   | 0.787852 |
| Klrc1         | chr6:129666014-129678973 | 0.1508 | 0.2193 | 0.5403   | 0.722144 |
| Klra1         | chr6:130363917-130386874 | 0.1212 | 0.0428 | -1.5033  | 0.493050 |
| E330021D16Rik | chr6:136400714-136401830 | 0.6698 | 0.3380 | -0.9868  | 0.607677 |
| Sox5          | chr6:143828424-144781977 | 0.0298 | 0.0135 | -1.1392  | 0.567350 |
| Far2os1       | chr6:148060854-148067873 | 0.5387 | 0.0001 | -12.3953 | 0.285591 |
| Nlrp12        | chr7:3221509-3249740     | 0.0692 | 0.0133 | -2.3770  | 0.385011 |
| Gm7363        | chr7:3983786-3984187     | 1.3353 | 3.1501 | 1.2382   | 0.548472 |
| Gm15773       | chr7:12603195-12604643   | 0.1918 | 0.4883 | 1.3480   | 0.309065 |
| Nanos2        | chr7:18987523-18988962   | 0.4135 | 0.3412 | -0.2776  | 0.844247 |
| Gipr          | chr7:19157124-19166127   | 0.2265 | 0.0075 | -4.9216  | 0.300258 |
| Cblc          | chr7:19778880-19796809   | 0.0925 | 0.0065 | -3.8317  | 0.318612 |
| Ceacam2       | chr7:25516041-25540004   | 0.1141 | 0.0001 | -10.1555 | 0.285591 |
| Gm10651       | chr7:27949154-27949763   | 0.3858 | 0.6195 | 0.6832   | 0.679638 |
| Gm12755       | chr7:33998011-34006461   | 0.8332 | 0.1041 | -3.0010  | 0.269349 |
| Klk15         | chr7:43933770-43939590   | 0.2792 | 0.0001 | -11.4472 | 0.285591 |
| 1700028J19Rik | chr7:44229932-44236122   | 0.2166 | 0.1997 | -0.1170  | 0.922758 |
| Aspdh         | chr7:44465390-44467757   | 0.1837 | 0.0683 | -1.4281  | 0.535301 |
| Mybpc2        | chr7:44501698-44524669   | 0.0649 | 0.0740 | 0.1896   | 0.922883 |
| Mir707        | chr7:44849698-44849771   | 3.8027 | 0.9267 | -2.0369  | 0.415916 |
| Lhb           | chr7:45418352-45421854   | 0.2418 | 0.1127 | -1.1011  | 0.420935 |
| Sec1          | chr7:45677688-45694402   | 0.3030 | 0.0269 | -3.4949  | 0.328994 |
| Gm14377       | chr7:47110850-47125990   | 0.1429 | 0.0586 | -1.2851  | 0.540966 |
| Nipa1         | chr7:55977566-56019954   | 0.1745 | 0.0883 | -0.9833  | 0.605070 |
| Gm15888       | chr7:55979926-55980850   | 0.4367 | 0.4181 | -0.0626  | 0.970725 |
| Ttl13         | chr7:80246375-80260821   | 0.1525 | 0.1233 | -0.3067  | 0.845656 |
| Gm15880       | chr7:80636016-80644384   | 1.5471 | 0.6427 | -1.2673  | 0.417822 |
| A530021J07Rik | chr7:83148643-83155922   | 0.7738 | 0.7256 | -0.0926  | 0.948523 |
| Gm26708       | chr7:84152357-84194973   | 0.3324 | 0.0412 | -3.0113  | 0.349542 |
| Kctd14        | chr7:97451333-97459553   | 0.0944 | 0.1515 | 0.6825   | 0.689757 |
| Gm10605       | chr7:99625935-99631711   | 0.0958 | 0.0709 | -0.4352  | 0.817493 |
| Gpx2-ps1      | chr7:100264943-100265246 | 1.0572 | 0.1453 | -2.8634  | 0.352735 |
| Art5          | chr7:102096878-102102845 | 0.2839 | 0.1753 | -0.6956  | 0.694521 |
| Art1          | chr7:102101742-102111148 | 0.1809 | 0.0001 | -10.8212 | 0.285591 |
| 9130208D14Rik | chr7:105824222-105831515 | 0.1073 | 0.0369 | -1.5406  | 0.022962 |
| Gm22372       | chr7:106426711-106426847 | 1.5702 | 1.3570 | -0.2105  | 0.896781 |
| Acsm4         | chr7:119690025-119714567 | 0.1290 | 0.0690 | -0.9025  | 0.660575 |
| NA            | chr7:120688218-120688323 | 2.0337 | 1.4134 | -0.5250  | 0.791824 |
| Gm16326       | chr7:122131091-122131505 | 0.9285 | 0.3093 | -1.5858  | 0.477927 |
| Asphd1        | chr7:126945566-126949582 | 0.1533 | 0.2736 | 0.8354   | 0.528898 |
| NA            | chr7:127524696-127524965 | 1.6670 | 1.6801 | 0.0113   | 0.993868 |
| Snora30       | chr7:127527873-127528003 | 1.6426 | 6.0543 | 1.8820   | 0.208865 |
| Stx1b         | chr7:127803899-127824549 | 0.1214 | 0.0975 | -0.3164  | 0.839872 |
| Ano9          | chr7:141101218-141117806 | 0.0710 | 0.0578 | -0.2970  | 0.845301 |
| Cend1         | chr7:141426445-141429491 | 0.1565 | 0.2220 | 0.5046   | 0.754464 |
| Gm7290        | chr7:142757255-142757852 | 0.7230 | 0.2085 | -1.7939  | 0.255426 |
| Lrrc8e        | chr8:4226826-4237470     | 0.2257 | 0.0289 | -2.9636  | 0.103872 |
| Gm7461        | chr8:4677538-4678365     | 0.2583 | 0.6443 | 1.3188   | 0.464883 |
| Efnb2         | chr8:8617433-8660773     | 0.0840 | 0.1016 | 0.2742   | 0.865656 |
| Grk1          | chr8:13405080-13421945   | 0.0921 | 0.0202 | -2.1863  | 0.401446 |
| Gm5117        | chr8:31737053-31739763   | 0.0914 | 0.1272 | 0.4778   | 0.750939 |
| Gm5908        | chr8:32476882-32477329   | 0.5256 | 0.5603 | 0.0923   | 0.956444 |
| Wwc2          | chr8:47826082-47990543   | 0.0588 | 0.0325 | -0.8556  | 0.632209 |
| Gm15991       | chr8:67956769-67978051   | 0.2494 | 0.0001 | -11.2845 | 0.285591 |
| Gm25172       | chr8:70039103-70039190   | 6.7032 | 1.5539 | -2.1090  | 0.175187 |
| Lrrc25        | chr8:70616843-70620850   | 0.2853 | 0.3368 | 0.2395   | 0.904690 |
| Kcnn1         | chr8:70842048-70857008   | 0.1002 | 0.0001 | -9.9683  | 0.285591 |
| Gm5912        | chr8:95577470-95578908   | 0.3268 | 0.0665 | -2.2960  | 0.395762 |
| Mir328        | chr8:105308363-105308460 | 4.1826 | 6.2849 | 0.5875   | 0.682367 |
| Hsd11b2       | chr8:105518745-105523984 | 0.1274 | 0.1004 | -0.3442  | 0.871955 |
| Nrn1l         | chr8:105893566-105895023 | 0.6576 | 0.1443 | -2.1878  | 0.398147 |
| Tmed6         | chr8:107061483-107065644 | 0.2723 | 0.3996 | 0.5534   | 0.817929 |
| Snord71       | chr8:109839294-109839379 | 5.3969 | 2.2240 | -1.2790  | 0.358946 |
| Gm25321       | chr8:109840587-109840689 | 7.7170 | 1.7659 | -2.1276  | 0.157366 |
| Gm22          | chr8:122269568-122272646 | 0.0903 | 0.0282 | -1.6787  | 0.471143 |
| 4732419C18Rik | chr8:123744630-123754228 | 0.0704 | 0.1668 | 1.2445   | 0.394122 |
| Mir1967       | chr8:124022640-124022722 | 5.4685 | 2.1441 | -1.3508  | 0.520093 |

|               |                          |        |        |          |          |
|---------------|--------------------------|--------|--------|----------|----------|
| Kcnk1         | chr8:125995101-126030683 | 0.1790 | 0.1398 | -0.3567  | 0.816899 |
| Gm21399       | chr8:129252997-129253597 | 0.4983 | 0.2648 | -0.9123  | 0.606022 |
| Gm17571       | chr9:13444033-13446753   | 3.8862 | 4.0351 | 0.0542   | 0.959705 |
| Gm7808        | chr9:19927895-19928282   | 0.9705 | 0.7523 | -0.3675  | 0.776159 |
| Pate2         | chr9:35570283-35690318   | 0.1475 | 0.0627 | -1.2333  | 0.288280 |
| Gm8343        | chr9:37685940-37686934   | 0.2794 | 0.3125 | 0.1617   | 0.907659 |
| Olfr920       | chr9:38752795-38756863   | 0.1744 | 0.3340 | 0.9373   | 0.406117 |
| Hykk          | chr9:54917282-54949924   | 0.0264 | 0.0389 | 0.5606   | 0.684590 |
| AY074887      | chr9:54950265-54950954   | 0.5036 | 0.5313 | 0.0771   | 0.953540 |
| lqch          | chr9:63421454-63602493   | 0.0711 | 0.0129 | -2.4644  | 0.376869 |
| Gm22455       | chr9:64177122-64177193   | 3.9098 | 8.9490 | 1.1946   | 0.329624 |
| Gm16073       | chr9:65838166-65838683   | 0.7435 | 0.7540 | 0.0202   | 0.989329 |
| Aldh1a2       | chr9:71215788-71296243   | 0.1604 | 0.0778 | -1.0449  | 0.622523 |
| 5830418P13Rik | chr9:103423577-103461255 | 0.0984 | 0.1994 | 1.0189   | 0.485424 |
| Tmem108       | chr9:103482935-103761837 | 0.7002 | 0.3519 | -0.9926  | 0.453115 |
| Col6a6        | chr9:105689416-105828085 | 0.0315 | 0.0036 | -3.1162  | 0.342809 |
| Mirlet7g      | chr9:106178839-106178927 | 6.0662 | 2.2735 | -1.4159  | 0.494855 |
| Tlr9          | chr9:106222597-106226876 | 0.0801 | 0.0938 | 0.2283   | 0.892431 |
| 4930500F10Rik | chr9:106247959-106248907 | 0.6841 | 0.1556 | -2.1366  | 0.404294 |
| 4930535L15Rik | chr9:107998115-108002404 | 0.5180 | 0.1518 | -1.7709  | 0.470240 |
| Gm16142       | chr9:115990955-116001788 | 0.0975 | 0.0058 | -4.0699  | 0.313077 |
| Gm17021       | chr9:123772184-123790939 | 0.4623 | 1.6686 | 1.8518   | 0.052957 |
| Gm4984        | chrX:12651882-12652821   | 0.4824 | 0.3405 | -0.5024  | 0.647077 |
| Gm25202       | chrX:14315400-14315591   | 3.0498 | 2.6009 | -0.2297  | 0.816443 |
| Gm9436        | chrX:17674429-17676284   | 0.1728 | 0.0072 | -4.5801  | 0.304428 |
| A230072C01Rik | chrX:20961683-20986737   | 3.0092 | 2.0441 | -0.5579  | 0.575076 |
| Gm14541       | chrX:36839136-36839293   | 2.3122 | 0.5271 | -2.1331  | 0.419976 |
| Gm15034       | chrX:49158222-49158571   | 0.9178 | 0.0758 | -3.5976  | 0.325746 |
| Mir363        | chrX:52741692-52741767   | 3.7013 | 5.9693 | 0.6895   | 0.680644 |
| Mir18b        | chrX:52742330-52742413   | 9.1820 | 1.5674 | -2.5505  | 0.151386 |
| C430049B03Rik | chrX:53055045-53057190   | 0.1460 | 0.4767 | 1.7073   | 0.403341 |
| 3830403N18Rik | chrX:56136571-56153498   | 0.6060 | 0.0518 | -3.5479  | 0.327308 |
| Hspa9-ps1     | chrX:60576945-60578878   | 0.1327 | 0.2407 | 0.8593   | 0.499534 |
| Gm14686       | chrX:74261031-74261374   | 1.2967 | 1.8554 | 0.5169   | 0.561819 |
| Gm7153        | chrX:75723671-75724126   | 0.5633 | 0.9158 | 0.7013   | 0.614485 |
| Oat-rs1       | chrX:75915215-75916526   | 0.2281 | 0.1608 | -0.5043  | 0.812665 |
| Gm14761       | chrX:85823167-85823429   | 0.8966 | 0.0001 | -13.1302 | 0.285591 |
| Rpl13-ps5     | chrX:94789716-94790349   | 0.4829 | 0.3047 | -0.6645  | 0.658440 |
| Gm14860       | chrX:103514921-103515350 | 0.9458 | 0.7398 | -0.3543  | 0.811782 |
| Gm6335        | chrX:112162553-112163747 | 0.2018 | 0.0264 | -2.9364  | 0.272283 |
| Klhl4         | chrX:114474332-114560829 | 0.0895 | 0.1658 | 0.8902   | 0.539281 |
| Tceal3        | chrX:136590841-136668378 | 0.1953 | 0.0938 | -1.0572  | 0.401083 |
| Trpc5         | chrX:144381670-144688180 | 0.0810 | 0.0092 | -3.1351  | 0.339941 |
| Gm5395        | chrX:151655187-151656102 | 0.3035 | 0.1492 | -1.0240  | 0.598958 |
| Gm7150        | chrX:153403089-153404070 | 0.2831 | 0.0902 | -1.6494  | 0.466529 |
| Ptchd1        | chrX:155573454-155623814 | 0.0783 | 0.0109 | -2.8411  | 0.358607 |
| Gm15186       | chrX:159588464-159589027 | 1.7905 | 0.1987 | -3.1719  | 0.194189 |
| Ghr           | chr15:3317759-3583492    | 0.0308 | 0.0482 | 0.6471   | 0.784152 |
| Gm2093        | chr15:3996038-4015858    | 0.0728 | 0.1027 | 0.4965   | 0.717568 |
| Acot10        | chr15:20665218-20666750  | 0.3019 | 0.1938 | -0.6397  | 0.535594 |
| n-R5s39       | chr15:39146379-39146487  | 8.6792 | 1.0353 | -3.0675  | 0.163959 |
| Gm22299       | chr15:58041515-58041651  | 1.5702 | 0.2392 | -2.7145  | 0.367421 |
| Cdc42ep1      | chr15:78842646-78850902  | 0.0841 | 0.0001 | -9.7160  | 0.285591 |
| Sox10         | chr15:79154912-79164490  | 0.2444 | 0.0499 | -2.2915  | 0.027257 |
| Gm18284       | chr15:81674254-81674878  | 0.4214 | 0.7730 | 0.8752   | 0.438487 |
| Csdc2         | chr15:81936758-81950941  | 0.1248 | 0.0304 | -2.0358  | 0.421934 |
| Slc2a13       | chr15:91267695-91573261  | 0.0435 | 0.0521 | 0.2605   | 0.883173 |
| Endou         | chr15:97711018-97731405  | 0.2028 | 0.1288 | -0.6555  | 0.502451 |
| Ddn           | chr15:98803781-98807925  | 0.1314 | 0.0912 | -0.5271  | 0.744231 |
| Gm3558        | chr14:7545150-7568566    | 0.1986 | 0.0523 | -1.9249  | 0.236168 |
| 4933413J09Rik | chr14:26356573-26400456  | 0.1016 | 0.0907 | -0.1636  | 0.905492 |
| Gm16241       | chr14:26389198-26395521  | 0.2162 | 0.0001 | -11.0783 | 0.064157 |
| Hesx1         | chr14:27000361-27002329  | 0.5435 | 0.3899 | -0.4792  | 0.702375 |
| 3425401B19Rik | chr14:32659118-32685272  | 0.0655 | 0.0001 | -9.3562  | 0.285591 |
| Gm10916       | chr14:50769247-50769730  | 0.9285 | 0.9159 | -0.0197  | 0.989902 |
| Rnase12       | chr14:51056697-51057242  | 0.6270 | 0.0001 | -12.6142 | 0.285591 |
| Rnase6        | chr14:51129067-51131122  | 0.4383 | 0.3932 | -0.1566  | 0.924906 |
| Olfr1509      | chr14:52450392-52451402  | 0.2749 | 0.0001 | -11.4249 | 0.285591 |
| Trav9d-1      | chr14:52792207-52792776  | 0.7696 | 0.8309 | 0.1106   | 0.952192 |
| Trav9n-1      | chr14:53101692-53102401  | 0.4396 | 0.1953 | -1.1703  | 0.598059 |
| Trav13n-3     | chr14:53337121-53337638  | 1.1440 | 0.5073 | -1.1732  | 0.574937 |

|               |                           |        |        |          |          |
|---------------|---------------------------|--------|--------|----------|----------|
| Trav13n-4     | chr14:53363835-53364102   | 1.0397 | 2.1796 | 1.0678   | 0.291901 |
| Trav7-2       | chr14:53390569-53391142   | 0.5326 | 0.1142 | -2.2221  | 0.399624 |
| Trdv4         | chr14:54075003-54075515   | 0.8047 | 1.8774 | 1.2222   | 0.477504 |
| Rnf17         | chr14:56402696-56525032   | 0.0499 | 0.1121 | 1.1679   | 0.537975 |
| Gm16301       | chr14:59414071-59414636   | 0.9423 | 0.5869 | -0.6830  | 0.511844 |
| Gm9013        | chr14:60039609-60040491   | 0.3291 | 0.6218 | 0.9182   | 0.474882 |
| Arl11         | chr14:61309752-61311936   | 0.2739 | 0.4423 | 0.6917   | 0.513210 |
| Gm6984        | chr14:73953921-73955586   | 0.2822 | 0.0792 | -1.8335  | 0.436363 |
| Gm10110       | chr14:89896222-89898466   | 0.1630 | 0.1824 | 0.1622   | 0.907614 |
| Mir92-1       | chr14:115044426-115044506 | 3.4699 | 4.2791 | 0.3024   | 0.827907 |
| Tmem181b-ps   | chr17:6448039-6449571     | 0.3298 | 0.6182 | 0.9066   | 0.563060 |
| NA            | chr17:15010265-15022448   | 0.3084 | 0.2209 | -0.4812  | 0.774207 |
| Prss27        | chr17:24038143-24045954   | 0.1876 | 0.0601 | -1.6413  | 0.469773 |
| BC028777      | chr17:24208860-24221730   | 0.4084 | 0.4221 | 0.0475   | 0.965134 |
| 2810468N07Rik | chr17:25570810-25575043   | 0.7020 | 0.0740 | -3.2455  | 0.124669 |
| Armc12        | chr17:28530859-28538954   | 0.3747 | 0.2063 | -0.8613  | 0.640142 |
| Gm23887       | chr17:28989976-28990148   | 2.9796 | 2.9893 | 0.0047   | 0.997278 |
| Ephx3         | chr17:32183769-32189549   | 0.0940 | 0.0326 | -1.5277  | 0.514048 |
| Gm25667       | chr17:32956609-32956884   | 2.8624 | 0.2403 | -3.5741  | 0.086653 |
| Vva7          | chr17:35016578-35026741   | 0.0892 | 0.1533 | 0.7807   | 0.633739 |
| Sapcd1        | chr17:35025958-35028016   | 0.2909 | 0.2879 | -0.0148  | 0.992422 |
| Gm9840        | chr17:35935461-35935963   | 0.4680 | 0.0527 | -3.1494  | 0.342809 |
| Mir877        | chr17:35960729-35960814   | 4.9117 | 5.5512 | 0.1766   | 0.880438 |
| Trim40        | chr17:36881597-36890123   | 0.1604 | 0.0001 | -10.6473 | 0.285591 |
| Trem14        | chr17:48264294-48275360   | 0.1177 | 0.0887 | -0.4091  | 0.811901 |
| Gm7334        | chr17:50698524-50699880   | 0.3080 | 0.0915 | -1.7504  | 0.378544 |
| Snord92       | chr17:71631280-71631365   | 3.2658 | 2.4200 | -0.4324  | 0.783857 |
| Gm25706       | chr17:80196157-80196404   | 0.9510 | 1.3723 | 0.5290   | 0.680560 |
| Arhgef33      | chr17:80307406-80388688   | 0.0918 | 0.0642 | -0.5155  | 0.748432 |
| NA            | chr17:88459356-88459456   | 2.3489 | 1.0774 | -1.1245  | 0.582409 |
| Gm6142        | chr16:4320355-4320680     | 1.8760 | 1.3843 | -0.4384  | 0.766379 |
| Gm7541        | chr16:8623185-8623720     | 1.3915 | 0.6953 | -1.0010  | 0.329152 |
| Rpl39l        | chr16:10170225-10174911   | 0.8994 | 0.1691 | -2.4108  | 0.391312 |
| NA            | chr16:16078158-16078229   | 3.6090 | 0.1862 | -4.2767  | 0.309524 |
| Gm24927       | chr16:17341905-17342012   | 2.1952 | 1.8290 | -0.2633  | 0.868591 |
| Gm15798       | chr16:18944257-18944665   | 0.5235 | 1.1054 | 1.0785   | 0.476247 |
| Gm17799       | chr16:19723311-19723978   | 0.3843 | 0.0001 | -11.9079 | 0.285591 |
| Gm15760       | chr16:20545917-20546200   | 0.8301 | 2.1608 | 1.3803   | 0.467292 |
| Gm24898       | chr16:21774112-21774218   | 3.8275 | 1.2763 | -1.5844  | 0.476832 |
| Liph          | chr16:21953825-21995542   | 0.0620 | 0.0441 | -0.4915  | 0.761762 |
| Adipoq        | chr16:23146535-23158028   | 0.1702 | 0.3047 | 0.8404   | 0.626475 |
| Gm15742       | chr16:30969392-30973518   | 0.4303 | 0.8453 | 0.9742   | 0.265792 |
| Gm24879       | chr16:31747199-31747342   | 1.6426 | 0.4621 | -1.8297  | 0.460963 |
| Hgd           | chr16:37580152-37632020   | 0.2209 | 0.1378 | -0.6806  | 0.653317 |
| Gm15711       | chr16:43312593-43313128   | 4.5215 | 1.2790 | -1.8218  | 0.266216 |
| Morc1         | chr16:48431236-48630905   | 0.1891 | 0.1037 | -0.8665  | 0.670005 |
| Retnlg        | chr16:48872607-48874498   | 0.4567 | 0.7789 | 0.7702   | 0.643900 |
| Tmem45a       | chr16:56805160-56886166   | 0.0979 | 0.1007 | 0.0409   | 0.981680 |
| Olfr175-ps1   | chr16:58823780-58826761   | 0.5604 | 0.3485 | -0.6851  | 0.690658 |
| Gm23940       | chr19:3490308-3490413     | 2.6438 | 0.7164 | -1.8838  | 0.435476 |
| Gm960         | chr19:4625840-4698668     | 0.1281 | 0.0860 | -0.5753  | 0.748973 |
| Gm5510        | chr19:6152714-6153200     | 0.7168 | 0.3859 | -0.8932  | 0.627867 |
| Gm17227       | chr19:7297657-7304528     | 0.2523 | 0.6486 | 1.3622   | 0.358639 |
| Stxbp3b       | chr19:9557605-9559248     | 0.3606 | 0.1131 | -1.6723  | 0.487018 |
| Gm5244        | chr19:12846772-12847273   | 0.4689 | 0.5680 | 0.2764   | 0.854042 |
| E030024N20Rik | chr19:16164311-16164805   | 0.6172 | 1.1055 | 0.8410   | 0.481352 |
| Gm24252       | chr19:25166084-25166216   | 1.9413 | 5.8118 | 1.5820   | 0.311324 |
| Gm20616       | chr19:26620821-26623419   | 0.9661 | 0.3582 | -1.4312  | 0.506848 |
| Ankrd22       | chr19:34122548-34166053   | 0.2275 | 0.1091 | -1.0600  | 0.580150 |
| Myof          | chr19:37899035-38043577   | 0.0572 | 0.0847 | 0.5671   | 0.679050 |
| Scd1          | chr19:44394450-44407709   | 0.0677 | 0.1487 | 1.1346   | 0.580822 |
| Gsto2         | chr19:47865544-47886324   | 0.5204 | 0.1482 | -1.8122  | 0.252595 |
| Gm22240       | chr19:47919191-47919273   | 3.1249 | 0.5578 | -2.4859  | 0.377479 |
| Tcf7l2        | chr19:55741809-55933654   | 0.0392 | 0.0001 | -8.6145  | 0.285591 |
| Nrap          | chr19:56320034-56390037   | 0.1009 | 0.0830 | -0.2815  | 0.852163 |
| Gfra1         | chr19:58235603-58455909   | 0.0391 | 0.0453 | 0.2128   | 0.904022 |
| Snora19       | chr19:60774329-60774461   | 1.9413 | 4.3045 | 1.1489   | 0.590641 |
| Slco5a1       | chr1:12866548-12991177    | 0.0192 | 0.0688 | 1.8419   | 0.189927 |
| Xkr9          | chr1:13668770-13701723    | 0.1110 | 0.0430 | -1.3681  | 0.527416 |
| Gm5828        | chr1:16768269-16770138    | 0.2400 | 0.1785 | -0.4269  | 0.805947 |
| Gm16328       | chr1:21390905-21391101    | 1.6342 | 0.0001 | -13.9963 | 0.285591 |



|               |                          |        |        |          |          |
|---------------|--------------------------|--------|--------|----------|----------|
| NA            | chr1:24005504-24005894   | 0.6722 | 0.3697 | -0.8625  | 0.579003 |
| NA            | chr1:33669842-33670712   | 0.4419 | 0.5409 | 0.2917   | 0.852516 |
| Gm15455       | chr1:33835898-33838914   | 0.0709 | 0.2422 | 1.7724   | 0.041905 |
| Rpl12-ps1     | chr1:36957929-36958427   | 0.8223 | 0.6837 | -0.2663  | 0.770295 |
| Gm26805       | chr1:37865298-37871388   | 0.0900 | 0.0139 | -2.6923  | 0.362048 |
| Npas2         | chr1:39193730-39363234   | 0.1035 | 0.1259 | 0.2831   | 0.713923 |
| Slc40a1       | chr1:45908069-45925594   | 0.0696 | 0.0933 | 0.4222   | 0.830473 |
| Als2cr11      | chr1:59050505-59094900   | 0.0970 | 0.0296 | -1.7116  | 0.479708 |
| Fzd7          | chr1:59482146-59486947   | 0.0713 | 0.0819 | 0.2001   | 0.900502 |
| Snord11       | chr1:59704788-59704874   | 2.4830 | 1.8319 | -0.4387  | 0.800618 |
| Gm11582       | chr1:60948229-60948465   | 1.8097 | 0.2068 | -3.1294  | 0.343825 |
| Gm15793       | chr1:66849107-66849602   | 0.7603 | 1.3009 | 0.7748   | 0.516029 |
| Gpbar1        | chr1:74278549-74279624   | 0.2583 | 0.3568 | 0.4659   | 0.746409 |
| Vil1          | chr1:74409375-74435559   | 0.1215 | 0.0768 | -0.6622  | 0.505100 |
| Gm25035       | chr1:74586895-74586972   | 3.0505 | 0.9768 | -1.6429  | 0.469773 |
| Asic4         | chr1:75450435-75474343   | 0.0862 | 0.0951 | 0.1418   | 0.930858 |
| Gm5529        | chr1:79922535-79923426   | 0.3422 | 0.0332 | -3.3666  | 0.271127 |
| n-R5s215      | chr1:85674881-85674985   | 4.0923 | 3.5552 | -0.2030  | 0.873247 |
| 2810459M11Rik | chr1:86045862-86055456   | 0.1860 | 0.1406 | -0.4040  | 0.794956 |
| Gm24148       | chr1:86352007-86352087   | 3.4699 | 8.7534 | 1.3349   | 0.503838 |
| Ecel1         | chr1:87147654-87156521   | 0.1038 | 0.7883 | 2.9247   | 0.255690 |
| Espnl         | chr1:91322074-91348306   | 0.1740 | 0.0313 | -2.4763  | 0.163965 |
| Gm6430        | chr1:97024680-97025928   | 0.2739 | 0.2296 | -0.2541  | 0.874153 |
| Gm25322       | chr1:119530210-119530314 | 2.0533 | 1.0387 | -0.9832  | 0.608617 |
| 5430435G22Rik | chr1:131688694-131713542 | 0.0941 | 0.0098 | -3.2641  | 0.337337 |
| Gm8618        | chr1:134109367-134109799 | 0.6735 | 0.6792 | 0.0122   | 0.990605 |
| Gm25612       | chr1:134505337-134505463 | 3.8103 | 2.7427 | -0.4743  | 0.721701 |
| Gm16880       | chr1:136696210-136726142 | 0.1454 | 0.0083 | -4.1353  | 0.311892 |
| Gm26936       | chr1:137928388-137969240 | 0.6004 | 0.0654 | -3.1984  | 0.340621 |
| Rasal2        | chr1:157135182-157412595 | 0.0188 | 0.0383 | 1.0293   | 0.505047 |
| Gm23402       | chr1:165809635-165809742 | 2.4570 | 0.6283 | -1.9674  | 0.354548 |
| Gm17224       | chr1:172213020-172213680 | 0.4272 | 0.0001 | -12.0605 | 0.285591 |
| Gm25288       | chr1:176793955-176794220 | 1.0476 | 0.1842 | -2.5079  | 0.382930 |
| 1700016C15Rik | chr1:17729813-177753324  | 0.2781 | 0.1377 | -1.0138  | 0.641969 |
| Enah          | chr1:181904444-182019980 | 0.0796 | 0.0712 | -0.1610  | 0.920448 |
| Tgfb2         | chr1:186623185-186705992 | 0.0498 | 0.0347 | -0.5202  | 0.767386 |
| Gm13184       | chr2:3468612-3474546     | 1.1246 | 0.5871 | -0.9377  | 0.466388 |
| Dhtkd1        | chr2:5896114-5942792     | 0.0366 | 0.0331 | -0.1450  | 0.946448 |
| Gm13384       | chr2:6132207-6133956     | 0.2384 | 0.0001 | -11.2197 | 0.285591 |
| A230108P19Rik | chr2:6193250-6321611     | 0.0855 | 0.0119 | -2.8464  | 0.352958 |
| Gm13388       | chr2:6431785-6436033     | 0.8040 | 1.4446 | 0.8455   | 0.403084 |
| Gm13217       | chr2:9041116-9042484     | 0.2848 | 0.1273 | -1.1621  | 0.575509 |
| Gm13262       | chr2:9906177-9914678     | 0.2172 | 0.1775 | -0.2915  | 0.795674 |
| Cacnb2        | chr2:14604305-14987908   | 0.0238 | 0.0395 | 0.7301   | 0.641896 |
| Gm25147       | chr2:18158686-18158791   | 4.6774 | 2.1014 | -1.1544  | 0.602413 |
| Gm13334       | chr2:18694031-18699037   | 0.2439 | 0.0352 | -2.7912  | 0.356378 |
| Gm13422       | chr2:23235235-23235739   | 0.5932 | 0.2055 | -1.5296  | 0.472735 |
| Gm13369       | chr2:24993356-24994343   | 0.3462 | 0.3869 | 0.1602   | 0.924834 |
| Entpd8        | chr2:25080303-25085716   | 0.1403 | 0.1570 | 0.1622   | 0.915976 |
| Gm25220       | chr2:25339650-25339745   | 6.5183 | 0.5564 | -3.5502  | 0.327308 |
| Gm22879       | chr2:26912230-26912287   | 8.5516 | 6.0466 | -0.5001  | 0.699785 |
| Gm13381       | chr2:28562196-28576698   | 0.9129 | 0.2002 | -2.1893  | 0.157553 |
| Gm13401       | chr2:29498211-29498502   | 0.8073 | 0.3018 | -1.4194  | 0.537441 |
| Gm23369       | chr2:32593468-32593573   | 3.2539 | 2.7057 | -0.2661  | 0.862837 |
| Eng           | chr2:32646594-32682669   | 0.2305 | 0.0632 | -1.8678  | 0.123169 |
| Gm23546       | chr2:33211804-33211941   | 1.8704 | 0.0001 | -14.1911 | 0.285591 |
| Gm13408       | chr2:34564998-34565796   | 0.7383 | 0.4027 | -0.8746  | 0.382792 |
| Snord90       | chr2:37400046-37400157   | 1.9238 | 4.0546 | 1.0756   | 0.622509 |
| Crb2          | chr2:37776248-37799103   | 0.0607 | 0.0755 | 0.3163   | 0.841036 |
| Gm13508       | chr2:49327376-49328151   | 0.2756 | 0.0001 | -11.4285 | 0.285591 |
| Gm13498       | chr2:50909683-50911849   | 0.2299 | 0.0001 | -11.1669 | 0.249170 |
| Gm13574       | chr2:59991950-59992344   | 0.5962 | 1.1558 | 0.9549   | 0.447348 |
| Slc38a11      | chr2:65316429-65364034   | 0.1063 | 0.1078 | 0.0206   | 0.983545 |
| Gm13618       | chr2:66187835-66192813   | 1.2790 | 0.4579 | -1.4819  | 0.494791 |
| Klhl41        | chr2:69670119-69684230   | 0.0845 | 0.0222 | -1.9287  | 0.430940 |
| Dlx1as        | chr2:71516453-71537891   | 0.4889 | 0.1990 | -1.2967  | 0.308776 |
| Gm13666       | chr2:73131744-73132543   | 0.3742 | 0.8935 | 1.2555   | 0.372058 |
| Gm13736       | chr2:87526048-87526752   | 0.3337 | 0.0795 | -2.0696  | 0.415009 |
| Gm13767       | chr2:90358177-90383163   | 0.2427 | 0.0937 | -1.3740  | 0.527593 |
| Gm13783       | chr2:91195905-91202778   | 0.3210 | 0.1750 | -0.8747  | 0.643562 |
| Gm13815       | chr2:92561268-92561680   | 0.5702 | 0.0730 | -2.9648  | 0.347431 |

|               |                          |        |        |          |          |
|---------------|--------------------------|--------|--------|----------|----------|
| Gm13889       | chr2:93955809-93957049   | 0.2412 | 0.1579 | -0.6110  | 0.720912 |
| ltpa-ps1      | chr2:94384501-94385098   | 0.9116 | 0.7132 | -0.3539  | 0.822202 |
| Rag1          | chr2:101638281-101649501 | 0.0389 | 0.0370 | -0.0709  | 0.973975 |
| Gm13919       | chr2:102039628-102066725 | 0.1094 | 0.3188 | 1.5434   | 0.271956 |
| Ccdc34os      | chr2:110031249-110050479 | 0.7064 | 0.1367 | -2.3695  | 0.155531 |
| Gm14138       | chr2:119187516-119188261 | 1.1347 | 0.2218 | -2.3547  | 0.346203 |
| Spint1        | chr2:119237361-119249527 | 0.0773 | 0.2892 | 1.9040   | 0.243126 |
| Gm14000       | chr2:121405240-121405473 | 1.6497 | 0.4494 | -1.8762  | 0.435847 |
| 4930417H01Rik | chr2:122702046-122721456 | 0.1874 | 0.3388 | 0.8544   | 0.446656 |
| Gm23753       | chr2:126634538-126634687 | 1.7198 | 1.0574 | -0.7017  | 0.699492 |
| Kcnp3         | chr2:127456497-127522094 | 0.1124 | 0.1318 | 0.2287   | 0.755908 |
| Hao1          | chr2:134497360-134554368 | 0.2245 | 0.0001 | -11.1323 | 0.285591 |
| Gm17374       | chr2:140152042-140153532 | 2.7215 | 6.3570 | 1.2239   | 0.653434 |
| Foxs1         | chr2:152931897-152933208 | 0.1630 | 0.0383 | -2.0892  | 0.411432 |
| Gm14227       | chr2:155198631-155199260 | 0.7915 | 0.8801 | -0.1532  | 0.897947 |
| Gm14279       | chr2:157521695-157522028 | 0.8337 | 0.2382 | -1.8075  | 0.464406 |
| Gm24379       | chr2:158487601-158487687 | 6.5010 | 1.2292 | -2.4029  | 0.180590 |
| Gm16316       | chr2:163685003-163692279 | 0.1260 | 0.0762 | -0.7252  | 0.702430 |
| n-R5s207      | chr2:164157403-164157521 | 2.8954 | 2.8548 | -0.2040  | 0.991414 |
| 5031425F14Rik | chr2:166447450-166459232 | 0.1121 | 0.0728 | -0.6215  | 0.720178 |
| Gm11474       | chr2:167535165-167535442 | 1.3876 | 1.0347 | -0.4234  | 0.832599 |
| Rpl30-ps5     | chr2:174440928-174441289 | 1.1017 | 1.1166 | 0.0194   | 0.989663 |
| Gm14443       | chr2:175166254-175175871 | 0.0704 | 0.0461 | -0.6105  | 0.739999 |
| Gm14341       | chr2:180954463-180966812 | 0.5863 | 0.9970 | 0.7659   | 0.539201 |
| Gm5466        | chr2:181896822-181898712 | 0.2923 | 0.2326 | -0.3297  | 0.770897 |
| Cabyr         | chr18:12741323-12755146  | 0.1385 | 0.1014 | -0.4493  | 0.772859 |
| 2010110K18Rik | chr18:34751808-34758685  | 0.0749 | 0.1417 | 0.9195   | 0.558928 |
| 3222401L13Rik | chr18:37655906-37658737  | 0.1585 | 0.0174 | -3.1892  | 0.338021 |
| Gm10268       | chr18:38244827-38245382  | 0.8600 | 0.7558 | -0.1864  | 0.703893 |
| Pcdh12        | chr18:38267091-38284401  | 0.0918 | 0.0048 | -4.2488  | 0.309524 |
| Sema6a        | chr18:47235597-47368870  | 0.0269 | 0.0001 | -8.0692  | 0.285591 |
| Gm26403       | chr18:61138508-61138613  | 2.2371 | 1.1907 | -0.9098  | 0.641599 |
| Spink10       | chr18:62548910-62661366  | 0.2042 | 0.0085 | -4.5830  | 0.304428 |
| Slmo1         | chr18:67464848-67480581  | 0.1085 | 0.1026 | -0.0805  | 0.957537 |
| Gm26014       | chr18:77682613-77682745  | 1.9413 | 0.2003 | -3.2768  | 0.337337 |
| Siglec15      | chr18:78043613-78057395  | 0.2319 | 0.3536 | 0.6085   | 0.630452 |
| Slc14a2       | chr18:78146939-78209094  | 0.0735 | 0.0203 | -1.8573  | 0.432282 |
| Fam69c        | chr18:84720018-84740436  | 0.1124 | 0.2404 | 1.0970   | 0.508476 |
| NA            | chr3:32365774-32367436   | 0.1928 | 0.2942 | 0.6094   | 0.656808 |
| Gm9791        | chr3:34004778-34005511   | 0.3497 | 0.1142 | -1.6146  | 0.480875 |
| Gm22043       | chr3:40992692-40992850   | 1.8921 | 1.2512 | -0.5967  | 0.754416 |
| Slc7a11       | chr3:50364935-50443613   | 0.0362 | 0.0158 | -1.1928  | 0.553679 |
| Lhfp          | chr3:53041527-53261679   | 0.1863 | 0.2335 | 0.3262   | 0.687091 |
| A730090N16Rik | chr3:65324775-65349429   | 0.5109 | 0.3862 | -0.4039  | 0.843784 |
| NA            | chr3:69222418-69223616   | 0.2320 | 0.4543 | 0.9694   | 0.361713 |
| Arl14         | chr3:69222418-69223618   | 0.2314 | 0.4531 | 0.9694   | 0.361713 |
| Gm17212       | chr3:69335501-69335760   | 2.4166 | 1.1252 | -1.1028  | 0.347831 |
| Tmem144       | chr3:79813147-79842662   | 0.1637 | 0.1629 | -0.0070  | 0.996047 |
| Gm20652       | chr3:88616456-88621061   | 0.5576 | 1.7130 | 1.6192   | 0.238980 |
| Gm23054       | chr3:88862918-88863080   | 5.1725 | 1.6218 | -1.6733  | 0.220110 |
| Pklr          | chr3:89136141-89146784   | 0.0925 | 0.0092 | -3.3282  | 0.331963 |
| Efna3         | chr3:89313898-89322965   | 0.1405 | 0.0268 | -2.3887  | 0.392987 |
| Rplp0-ps1     | chr3:93278140-93279073   | 0.4248 | 0.3391 | -0.3251  | 0.759503 |
| Gm15234       | chr3:94658960-94660115   | 0.2827 | 0.2988 | 0.0801   | 0.968929 |
| Ctsk          | chr3:95499285-95509362   | 0.1914 | 0.0728 | -1.3946  | 0.466712 |
| C920021L13Rik | chr3:95871521-95889093   | 0.2536 | 0.1713 | -0.5662  | 0.643023 |
| Gm22581       | chr3:96724264-96724400   | 2.8262 | 4.9039 | 0.7951   | 0.629329 |
| Gm5544        | chr3:97930172-97967018   | 0.2877 | 0.4941 | 0.7802   | 0.740740 |
| Gm12485       | chr3:100680264-100680555 | 1.4676 | 1.9000 | 0.3725   | 0.768148 |
| Gm12488       | chr3:100955440-100955939 | 0.5136 | 0.3879 | -0.4049  | 0.807097 |
| Chia1         | chr3:106113228-106132120 | 0.1572 | 0.0241 | -2.7034  | 0.362416 |
| Fndc7         | chr3:108853677-108890008 | 0.0931 | 0.0697 | -0.4173  | 0.731775 |
| Uox           | chr3:146597076-146632305 | 0.0835 | 0.0001 | -9.7058  | 0.285591 |
| Slc44a5       | chr3:153973435-154271722 | 0.0330 | 0.0106 | -1.6337  | 0.469773 |
| mt-Tp         | chrM:15355-15422         | 4.7806 | 8.1468 | 0.7690   | 0.615896 |
| Fam110b       | chr4:5644089-6108223     | 0.0263 | 0.0878 | 1.7418   | 0.518322 |
| Gm22690       | chr4:16129565-16129675   | 1.9413 | 0.7972 | -1.2840  | 0.536402 |
| Gm11926       | chr4:31990856-31991286   | 0.8443 | 0.3145 | -1.4248  | 0.523785 |
| Gm11928       | chr4:32149785-32150222   | 0.5376 | 0.1210 | -2.1509  | 0.417828 |
| Gm12677       | chr4:44313426-44314058   | 0.7018 | 0.0001 | -12.7769 | 0.285591 |
| Gm23250       | chr4:46118179-46118446   | 0.9598 | 2.6774 | 1.4800   | 0.323591 |

|               |                           |         |         |          |          |
|---------------|---------------------------|---------|---------|----------|----------|
| Anks6         | chr4:47015668-47057306    | 0.1029  | 0.0427  | -1.2693  | 0.290715 |
| Actl7a        | chr4:56743421-56744925    | 0.3942  | 0.2020  | -0.9649  | 0.372073 |
| NA            | chr4:56897625-56897757    | 2.1030  | 1.0249  | -1.0369  | 0.593831 |
| Gm12596       | chr4:59260050-59263269    | 0.4126  | 0.3998  | -0.0452  | 0.974288 |
| Mup11         | chr4:60658465-60662411    | 0.2440  | 0.0001  | -11.2525 | 0.285591 |
| Zfp618        | chr4:62965572-63139708    | 0.1339  | 0.0018  | -6.1860  | 0.118038 |
| Rps18-ps1     | chr4:71370737-71371196    | 0.5874  | 0.7474  | 0.3476   | 0.706150 |
| Gm11258       | chr4:74688106-74689324    | 0.3030  | 0.0109  | -4.7904  | 0.253306 |
| Ccdc50-ps     | chr4:100567107-100568048  | 0.4312  | 0.3262  | -0.4026  | 0.799243 |
| O610043K17Rik | chr4:101353782-101399181  | 0.9420  | 0.4409  | -1.0952  | 0.438873 |
| Pcsk9         | chr4:106442328-106464329  | 0.0668  | 0.0933  | 0.4814   | 0.704719 |
| NA            | chr4:111807357-111808426  | 0.3851  | 0.0277  | -3.7989  | 0.274495 |
| Cfap57        | chr4:118554550-118620777  | 0.0638  | 0.0001  | -9.3183  | 0.285591 |
| Ldha-ps2      | chr4:119334388-119335445  | 0.2021  | 0.1314  | -0.6210  | 0.727911 |
| Gm12926       | chr4:123630294-123630703  | 0.6788  | 0.1119  | -2.6005  | 0.369289 |
| Gm12902       | chr4:123926233-123926555  | 0.6632  | 2.2895  | 1.7874   | 0.343488 |
| Fam167b       | chr4:129576814-129578549  | 0.2228  | 0.2131  | -0.0640  | 0.966252 |
| Gm13252       | chr4:132244945-132245266  | 0.7318  | 1.4300  | 0.9665   | 0.600452 |
| Gm12981       | chr4:132503560-132509649  | 1.3934  | 0.3332  | -2.0643  | 0.156139 |
| Gm12991       | chr4:135377157-135377235  | 3.5589  | 0.0001  | -15.1191 | 0.285591 |
| Gm13019       | chr4:139342182-139343333  | 0.9285  | 0.0001  | -13.1807 | 0.285591 |
| Gm13047       | chr4:141084863-141085678  | 0.3931  | 0.4070  | 0.0500   | 0.971636 |
| Gm13142       | chr4:147102326-147103981  | 0.2251  | 0.0552  | -2.0267  | 0.358475 |
| Gm13147       | chr4:147230283-147259338  | 0.1507  | 0.0187  | -3.0076  | 0.349542 |
| Nppa          | chr4:148000721-148002079  | 0.3704  | 0.1161  | -1.6740  | 0.454268 |
| Slc45a1       | chr4:150628571-150652174  | 0.1993  | 0.0253  | -2.9774  | 0.349313 |
| Gm13096       | chr4:152203925-152204467  | 1.5314  | 0.5078  | -1.5924  | 0.479480 |
| 4930432B10Rik | chr10:11244789-11281221   | 0.2469  | 0.0358  | -2.7852  | 0.273244 |
| Rsph4a        | chr10:33905110-33916021   | 0.1546  | 0.1293  | -0.2577  | 0.817155 |
| Gm26741       | chr10:52358766-52358853   | 30.7315 | 18.1889 | -0.7567  | 0.630646 |
| Pald1         | chr10:61319656-61383523   | 0.1212  | 0.0579  | -1.0657  | 0.569516 |
| Snord98       | chr10:62765575-62765640   | 15.9276 | 1.0165  | -3.9698  | 0.315778 |
| Vpreb3        | chr10:75943056-75949657   | 0.3173  | 0.4383  | 0.4663   | 0.737781 |
| Fstl3         | chr10:79777271-79782630   | 0.2341  | 0.1029  | -1.1864  | 0.552787 |
| Prss57        | chr10:79781473-79790961   | 0.2013  | 0.1357  | -0.5696  | 0.731407 |
| Cfd           | chr10:79890852-79892656   | 0.4133  | 0.0430  | -3.2634  | 0.337794 |
| Efna2         | chr10:80179481-80190010   | 0.2264  | 0.0230  | -3.2999  | 0.164354 |
| Gm10271       | chr10:116956823-116972609 | 1.7465  | 2.3638  | 0.4366   | 0.744650 |
| Gm15910       | chr10:120857628-120863326 | 0.6512  | 0.1556  | -2.0654  | 0.414334 |
| Kif5a         | chr10:127225695-127263363 | 0.0747  | 0.0738  | -0.0166  | 0.984505 |
| Gm26308       | chr10:128377830-128377899 | 11.0770 | 1.5655  | -2.8229  | 0.186043 |
| Inpp5j        | chr11:3494374-3504821     | 0.1242  | 0.0001  | -10.2785 | 0.253480 |
| Gm24958       | chr11:5038210-5038307     | 8.7071  | 3.0100  | -1.5324  | 0.487031 |
| Ras10a        | chr11:5058127-5060385     | 0.4436  | 0.1945  | -1.1894  | 0.542520 |
| Glns-ps1      | chr11:19720354-19721472   | 0.4631  | 0.1056  | -2.1334  | 0.405932 |
| Gm22600       | chr11:21197707-21197976   | 2.8359  | 0.0001  | -14.7915 | 0.285591 |
| Gm23772       | chr11:22846867-22846969   | 6.7715  | 1.8137  | -1.9005  | 0.396434 |
| Gpr75         | chr11:30885357-30893729   | 0.5401  | 0.0293  | -4.2055  | 0.309970 |
| Hba-a1        | chr11:32283510-32284465   | 0.3692  | 0.0689  | -2.4208  | 0.382329 |
| NA            | chr11:33172917-33173368   | 1.6311  | 0.0362  | -5.4956  | 0.295379 |
| Kcnp1         | chr11:33629338-33993152   | 0.0792  | 0.0280  | -1.5018  | 0.504892 |
| Gm12138       | chr11:40672905-40673856   | 0.5731  | 0.0140  | -5.3558  | 0.296366 |
| Ccnj1         | chr11:43528783-43586997   | 0.3086  | 0.0345  | -3.1628  | 0.223221 |
| Gm12186       | chr11:48996686-48997713   | 0.5041  | 0.2285  | -1.1417  | 0.561901 |
| Gm12187       | chr11:49069695-49071070   | 0.7729  | 0.2962  | -1.3836  | 0.513609 |
| Gm12192       | chr11:49697879-49698366   | 0.9587  | 0.9865  | 0.0412   | 0.971339 |
| Slc22a4       | chr11:53983122-54028090   | 0.2562  | 0.0554  | -2.2085  | 0.399743 |
| Gm12221       | chr11:54158925-54160056   | 0.3862  | 0.0873  | -2.1461  | 0.357953 |
| Gm24198       | chr11:54458161-54458269   | 5.3317  | 2.6355  | -1.0165  | 0.528639 |
| Mup-ps22      | chr11:55123694-55123937   | 2.0182  | 0.5389  | -1.9049  | 0.427893 |
| Pld6          | chr11:59783896-59787645   | 0.2017  | 0.0562  | -1.8431  | 0.441089 |
| Gm12281       | chr11:62697217-62697515   | 3.1085  | 0.0547  | -5.8295  | 0.293306 |
| Alox12b       | chr11:69156988-69169792   | 0.1794  | 0.0243  | -2.8814  | 0.351419 |
| Tm4sf5        | chr11:70505243-70511178   | 0.5329  | 0.0787  | -2.7594  | 0.358220 |
| Gm22297       | chr11:70996538-70996644   | 6.4951  | 0.0001  | -15.9871 | 0.131554 |
| Wscd1         | chr11:71749919-71789647   | 0.1231  | 0.0221  | -2.4744  | 0.300917 |
| Gm22075       | chr11:72800286-72800478   | 3.2024  | 1.2018  | -1.4140  | 0.488174 |
| Gm12338       | chr11:75599640-75600027   | 0.7745  | 0.9573  | 0.3057   | 0.800467 |
| Gm16075       | chr11:75860968-75861494   | 2.1887  | 0.0001  | -14.4178 | 0.285591 |
| Gm22611       | chr11:76974085-76974235   | 3.4608  | 3.3280  | -0.0565  | 0.956781 |
| Rpl13-ps1     | chr11:85111125-85111793   | 1.0197  | 0.0809  | -3.6551  | 0.322182 |

|               |                           |        |        |          |          |
|---------------|---------------------------|--------|--------|----------|----------|
| Hsd17b1       | chr11:101078410-101080527 | 0.3355 | 0.2976 | -0.1730  | 0.902071 |
| NA            | chr11:108149608-108149839 | 3.0411 | 0.1409 | -4.4320  | 0.287069 |
| Rpl23a-ps14   | chr11:108716482-108716906 | 1.1759 | 0.9257 | -0.3451  | 0.744242 |
| 4732490B19Rik | chr11:113203314-113209669 | 0.1813 | 0.1855 | 0.0325   | 0.973735 |
| Btbd17        | chr11:114791216-114795945 | 0.1027 | 0.0001 | -10.0040 | 0.285591 |
| Otop3         | chr11:115334730-115346927 | 0.3145 | 0.0001 | -11.6190 | 0.285591 |
| Sectm1a       | chr11:121067406-121081220 | 0.2795 | 0.0001 | -11.4486 | 0.197892 |
| Pfn4          | chr12:4769294-4778266     | 0.6885 | 0.1788 | -1.9448  | 0.425104 |
| Gm24142       | chr12:13490508-13490615   | 3.3102 | 0.0001 | -15.0146 | 0.285591 |
| 5730507C01Rik | chr12:18514737-18534191   | 0.5881 | 0.1565 | -1.9097  | 0.427257 |
| Gm20535       | chr12:21252117-21255952   | 0.3654 | 0.4634 | 0.3429   | 0.788402 |
| Sntg2         | chr12:30174481-30373375   | 0.1245 | 0.0844 | -0.5616  | 0.763457 |
| Slc26a3       | chr12:31390870-31473917   | 0.1327 | 0.0001 | -10.3740 | 0.285591 |
| Arl4aos       | chr12:40038098-40040027   | 0.5464 | 0.1829 | -1.5789  | 0.488195 |
| Acot4         | chr12:84038378-84044723   | 0.2499 | 0.0119 | -4.3984  | 0.306636 |
| Vash1         | chr12:86678699-86692091   | 0.1474 | 0.0744 | -0.9868  | 0.538356 |
| Gm20701       | chr12:101866948-101867295 | 2.0415 | 1.2014 | -0.7649  | 0.674104 |
| Dio3          | chr12:110279067-110281097 | 0.6711 | 0.2204 | -1.6067  | 0.471442 |
| Gm15995       | chr12:111726391-111727127 | 0.4747 | 0.7472 | 0.6544   | 0.643251 |
| BC022687      | chr12:112808974-112816245 | 0.1850 | 0.2926 | 0.6609   | 0.696533 |
| Ighv9-3       | chr12:114140691-114141122 | 2.8720 | 0.3707 | -2.9537  | 0.352767 |
| Ighv6-4       | chr12:114406476-114406773 | 2.2983 | 0.1643 | -3.8058  | 0.140996 |
| Idi2          | chr13:8952862-8960935     | 0.1701 | 0.0451 | -1.9162  | 0.426354 |
| Mir466i       | chr13:17747472-17747593   | 3.1523 | 0.8149 | -1.9518  | 0.427612 |
| Tcrg-V6       | chr13:19190367-19190929   | 1.5586 | 0.0001 | -13.9280 | 0.104051 |
| C230035I16Rik | chr13:23427974-23431022   | 0.5453 | 0.6011 | 0.1406   | 0.922189 |
| Hfe           | chr13:23702033-23710854   | 0.1221 | 0.0598 | -1.0301  | 0.578106 |
| Gm11344       | chr13:24410105-24410440   | 4.5544 | 0.6428 | -2.8249  | 0.355337 |
| Gm25043       | chr13:33567793-33568005   | 1.5422 | 0.5370 | -1.5220  | 0.515738 |
| Rbm24         | chr13:46418299-46431090   | 0.2374 | 0.1005 | -1.2402  | 0.531676 |
| Aspn          | chr13:49544442-49567557   | 0.6969 | 0.1642 | -2.0853  | 0.408507 |
| Gm7251        | chr13:49804943-49805952   | 0.2701 | 0.0859 | -1.6536  | 0.456667 |
| Snord93       | chr5:23852209-23852280    | 5.7248 | 1.7893 | -1.6778  | 0.324493 |
| E130116L18Rik | chr5:25222847-25223153    | 1.6917 | 1.3476 | -0.3281  | 0.840111 |
| Gm26608       | chr5:28019464-28071105    | 0.2017 | 0.1005 | -1.0044  | 0.591003 |
| Cgref1        | chr5:30933145-30945480    | 0.4675 | 0.0299 | -3.9644  | 0.293304 |
| Gm24003       | chr5:32913630-32913730    | 5.1765 | 0.7929 | -2.7068  | 0.367972 |
| Stk32b        | chr5:37446827-37717153    | 0.1349 | 0.0001 | -10.3972 | 0.285591 |
| Gm7854        | chr5:43235001-43235352    | 1.7853 | 0.5031 | -1.8273  | 0.441678 |
| Gm7879        | chr5:43913169-43913898    | 1.2334 | 0.0001 | -13.5903 | 0.285591 |
| Sel1l3        | chr5:53107083-53213452    | 0.0786 | 0.0001 | -9.6186  | 0.285591 |
| Cbfa2t2-ps1   | chr5:60231481-60232198    | 0.9223 | 0.5919 | -0.6399  | 0.644471 |
| Gm15847       | chr5:73013498-73017376    | 0.3754 | 0.1055 | -1.8311  | 0.460637 |
| 2010109A12Rik | chr5:93206517-93213475    | 0.9926 | 1.0076 | 0.0216   | 0.987913 |
| Fras1         | chr5:96373954-96784728    | 0.0396 | 0.0018 | -4.4872  | 0.304876 |
| Ube2d2b       | chr5:107830252-107831342  | 0.3250 | 0.0410 | -2.9875  | 0.344776 |
| 1010001B22Rik | chr5:109995510-109996398  | 0.9715 | 0.3972 | -1.2904  | 0.519574 |
| Gm26953       | chr5:112217059-112218474  | 0.9082 | 0.4203 | -1.1116  | 0.562115 |
| Svop          | chr5:114026909-114091570  | 0.1376 | 0.0593 | -1.2146  | 0.534725 |
| Gm13822       | chr5:114917317-114923277  | 1.9686 | 0.6442 | -1.6117  | 0.481295 |
| n-R5s174      | chr5:117196554-117196675  | 6.5297 | 0.0001 | -15.9947 | 0.285591 |
| Hpd           | chr5:123171806-123182725  | 0.3461 | 0.0824 | -2.0709  | 0.407361 |
| Gm24139       | chr5:134204468-134204756  | 1.7566 | 0.8213 | -1.0968  | 0.508848 |
| Hspb1         | chr5:135887918-135889563  | 0.5815 | 0.0514 | -3.5008  | 0.328872 |
| Alox5ap       | chr5:149265057-149288045  | 0.4158 | 0.6691 | 0.6864   | 0.584414 |
| Tex26         | chr5:149439705-149470620  | 0.2491 | 0.1767 | -0.4960  | 0.815726 |
| Gm24630       | chr5:150708043-150708149  | 7.4538 | 0.7768 | -3.2624  | 0.335976 |
| Col1a2        | chr6:4504813-4541543      | 0.0383 | 0.0024 | -4.0115  | 0.313573 |
| Gm9835        | chr6:4893351-4893777      | 1.6370 | 0.1623 | -3.3340  | 0.263036 |
| Met           | chr6:17463799-17573980    | 0.0356 | 0.0001 | -8.4749  | 0.285591 |
| Gm5303        | chr6:28361913-28363165    | 0.8270 | 0.0107 | -6.2785  | 0.291156 |
| Gm13782       | chr6:30673943-30682266    | 2.6317 | 0.0768 | -5.0985  | 0.298403 |
| Slc13a4       | chr6:35267956-35308131    | 0.0843 | 0.0288 | -1.5486  | 0.509781 |
| Fam115c       | chr6:42623018-42645254    | 0.1484 | 0.0001 | -10.5357 | 0.285591 |
| Olfr434       | chr6:43216882-43217938    | 0.4387 | 0.0001 | -12.0990 | 0.285591 |
| Rbpsuh-rs3    | chr6:46529350-46530922    | 0.1862 | 0.3966 | 1.0907   | 0.405334 |
| A930035D04Rik | chr6:47453775-47454320    | 0.7988 | 0.6086 | -0.3924  | 0.703920 |
| Hoxa2         | chr6:52162350-52165413    | 0.1238 | 0.0269 | -2.1998  | 0.411974 |
| Vmn1r4        | chr6:56924021-56958100    | 0.1586 | 0.0133 | -3.5770  | 0.324159 |
| Gm16838       | chr6:65768543-65779249    | 1.1687 | 0.0001 | -13.5126 | 0.285591 |
| Igkj4         | chr6:70723547-70723585    | 9.3206 | 1.6315 | -2.5142  | 0.376718 |

|               |                          |         |        |          |          |
|---------------|--------------------------|---------|--------|----------|----------|
| Tcf7l1        | chr6:72626377-72789254   | 0.1112  | 0.1228 | 0.1437   | 0.910939 |
| Atp6v1b1      | chr6:83743016-83758809   | 0.4386  | 0.1824 | -1.2655  | 0.573506 |
| Gm25961       | chr6:89249467-89249602   | 2.6236  | 0.0001 | -14.6793 | 0.285591 |
| Lhfp14        | chr6:113168089-113195384 | 0.1260  | 0.0113 | -3.4761  | 0.327654 |
| 3110021A11Rik | chr6:119848192-119849013 | 1.0288  | 0.0967 | -3.4119  | 0.332054 |
| Gm15532       | chr6:119892919-119893803 | 1.1096  | 0.3327 | -1.7379  | 0.470934 |
| Gm23851       | chr6:124964284-124964387 | 3.1742  | 5.6522 | 0.8324   | 0.558422 |
| Pianp         | chr6:124996693-125003096 | 0.2355  | 0.1399 | -0.7513  | 0.662462 |
| Dyrk4         | chr6:126876019-126921839 | 0.1095  | 0.1316 | 0.2648   | 0.842968 |
| Clec2g        | chr6:128934380-128984707 | 0.3314  | 0.1030 | -1.6855  | 0.468096 |
| Clec1b        | chr6:129397296-129409335 | 0.2030  | 0.0514 | -1.9803  | 0.438939 |
| Gm15785       | chr6:149433779-149434473 | 0.7683  | 0.7178 | -0.0979  | 0.953887 |
| Gm20775       | chrY:10640941-10643315   | 0.2237  | 0.0386 | -2.5340  | 0.187412 |
| Gm6792        | chr7:6252709-6282066     | 0.9903  | 0.3043 | -1.7026  | 0.463515 |
| Ceacam3       | chr7:17150281-17164253   | 0.2578  | 0.0001 | -11.3322 | 0.285591 |
| Gm19345       | chr7:19852002-19858347   | 0.2753  | 0.6559 | 1.2525   | 0.305027 |
| Cxcl17        | chr7:25400052-25412886   | 0.4655  | 0.0175 | -4.7364  | 0.302519 |
| B3gnt8        | chr7:25627623-25629490   | 0.2033  | 0.2463 | 0.2768   | 0.845737 |
| Mia           | chr7:27179741-27181157   | 1.2550  | 0.0563 | -4.4774  | 0.294546 |
| Gm23368       | chr7:30100839-30100935   | 3.9119  | 5.7323 | 0.5512   | 0.681983 |
| Gm26810       | chr7:30198629-30200889   | 0.7970  | 0.0718 | -3.4729  | 0.281904 |
| Rps12-ps5     | chr7:30263262-30263651   | 0.9372  | 0.8659 | -0.1140  | 0.901599 |
| Lgi4          | chr7:31059341-31070935   | 0.0833  | 0.0970 | 0.2190   | 0.893048 |
| Vmn2r58       | chr7:41836880-41872670   | 0.2737  | 0.0001 | -11.4184 | 0.285591 |
| Klk1b11       | chr7:43995876-43999875   | 0.4736  | 0.0189 | -4.6441  | 0.303717 |
| Snord88c      | chr7:44249851-44249941   | 3.6327  | 7.4629 | 1.0387   | 0.359093 |
| Hsd17b14      | chr7:45554892-45567752   | 0.4165  | 0.0369 | -3.4989  | 0.192991 |
| Ntn5          | chr7:45684021-45694556   | 0.2460  | 0.0180 | -3.7735  | 0.320478 |
| Csrp3         | chr7:48830397-48848051   | 0.3641  | 0.0001 | -11.8301 | 0.285591 |
| Gm9885        | chr7:78578829-78581034   | 0.3615  | 0.0738 | -2.2916  | 0.208516 |
| Fzd4          | chr7:89404365-89410110   | 0.0962  | 0.0001 | -9.9101  | 0.285591 |
| P4ha3         | chr7:100285519-100319699 | 0.2060  | 0.0195 | -3.4034  | 0.329646 |
| Arhgef17      | chr7:100869745-100932161 | 0.0483  | 0.0168 | -1.5224  | 0.371357 |
| P2ry2         | chr7:100996571-101011991 | 0.1726  | 0.0089 | -4.2765  | 0.309266 |
| Gm25405       | chr7:104423273-104423380 | 4.8379  | 2.8065 | -0.7856  | 0.672363 |
| Vwa3a         | chr7:120739556-120805742 | 0.0656  | 0.0069 | -3.2475  | 0.337794 |
| Mir3103       | chr7:128288368-128288435 | 8.1328  | 0.7890 | -3.3657  | 0.333824 |
| Mir202        | chr7:139957688-139957760 | 3.7840  | 0.6353 | -2.5744  | 0.371128 |
| Gm26102       | chr8:4274852-4275136     | 2.8780  | 0.9760 | -1.5601  | 0.474070 |
| Nek5          | chr8:22073615-22125053   | 0.3288  | 0.1141 | -1.5272  | 0.481076 |
| Smim18        | chr8:33742113-33747770   | 0.8346  | 0.6838 | -0.2875  | 0.864540 |
| Gm10131       | chr8:34111142-34111736   | 1.6054  | 0.1370 | -3.5510  | 0.327258 |
| Mtus1         | chr8:40990913-41133726   | 0.0325  | 0.0056 | -5.2267  | 0.372953 |
| Gm24684       | chr8:46080887-46080983   | 4.5408  | 0.2874 | -3.9819  | 0.315494 |
| 5330439A09Rik | chr8:54568549-54600987   | 0.4879  | 0.0001 | -12.2524 | 0.285591 |
| Gm21807       | chr8:68120350-68121527   | 0.3620  | 0.0197 | -4.1971  | 0.310879 |
| Mef2b         | chr8:70152777-70167488   | 0.3710  | 0.3590 | -0.0476  | 0.963064 |
| Nwd1          | chr8:72646710-72714746   | 0.0533  | 0.0033 | -4.0277  | 0.313573 |
| Crry-ps       | chr8:73750300-73750783   | 0.7898  | 0.0001 | -12.9473 | 0.285591 |
| Rtbdn         | chr8:84946990-84956603   | 0.2030  | 0.0912 | -1.1539  | 0.397666 |
| Gm25506       | chr8:85050206-85050276   | 5.4490  | 0.4647 | -3.5517  | 0.327258 |
| Abcc12        | chr8:86482259-86580686   | 0.0738  | 0.0001 | -9.5281  | 0.285591 |
| Gm21817       | chr8:92336667-92339250   | 0.2111  | 0.0001 | -11.0434 | 0.285591 |
| Cngb1         | chr8:95239044-95284181   | 0.0869  | 0.0357 | -1.2828  | 0.568767 |
| Ces2d-ps      | chr8:104867487-104874080 | 0.4214  | 0.1833 | -1.2007  | 0.393183 |
| Nol3          | chr8:105276446-105281939 | 0.4687  | 0.0826 | -2.5039  | 0.345124 |
| NA            | chr8:105661562-105661643 | 7.6634  | 2.2746 | -1.7524  | 0.428553 |
| Cdh3          | chr8:106510912-106556908 | 0.1784  | 0.0127 | -3.8116  | 0.318077 |
| Gm16118       | chr8:114698438-114708006 | 0.9216  | 0.0240 | -5.2623  | 0.297153 |
| Pkd1l2        | chr8:116995678-117082449 | 0.0538  | 0.0328 | -0.7132  | 0.650986 |
| Gm26971       | chr8:120520614-120521686 | 0.4830  | 0.0001 | -12.2377 | 0.285591 |
| 1700018B08Rik | chr8:121530779-121544320 | 0.6107  | 0.0378 | -4.0140  | 0.314704 |
| Gm27854       | chr8:123265778-123266005 | 3.6590  | 1.4620 | -1.3235  | 0.387402 |
| Gm22314       | chr8:123523259-123523540 | 1.4544  | 1.0896 | -0.4166  | 0.805278 |
| Gm26002       | chr8:128650996-128651103 | 5.0925  | 0.0001 | -15.6361 | 0.285591 |
| Gm26189       | chr9:13275515-13275622   | 3.3102  | 3.1247 | -0.0832  | 0.957508 |
| Gm16302       | chr9:14845612-14847835   | 1.8461  | 0.7927 | -1.2196  | 0.542431 |
| Mir199a-1     | chr9:21496494-21496564   | 11.9497 | 3.7312 | -1.6792  | 0.355354 |
| Gm17545       | chr9:22454289-22462062   | 5.6760  | 2.4389 | -1.2186  | 0.585481 |
| Gm16071       | chr9:31094201-31094994   | 0.7440  | 0.0873 | -3.0920  | 0.187198 |
| Tmem45b       | chr9:31426198-31464238   | 0.3294  | 0.0639 | -2.3656  | 0.381570 |

|               |                           |        |        |          |          |
|---------------|---------------------------|--------|--------|----------|----------|
| Gm24188       | chr9:35503587-35503695    | 3.0273 | 0.3953 | -2.9368  | 0.349103 |
| Gm20444       | chr9:44107300-44108960    | 2.0556 | 0.1312 | -3.9702  | 0.315088 |
| Abcg4         | chr9:44273187-44288615    | 0.1308 | 0.0322 | -2.0215  | 0.423644 |
| Mpzl2         | chr9:45042424-45054015    | 0.2186 | 0.0973 | -1.1674  | 0.466273 |
| Pih1d2        | chr9:50617320-50625000    | 0.1647 | 0.1504 | -0.1319  | 0.932898 |
| Sh2d7         | chr9:54538983-54545020    | 0.1581 | 0.0288 | -2.4549  | 0.387111 |
| Rfpl3s        | chr9:55962588-55980914    | 0.6689 | 0.0172 | -5.2837  | 0.296956 |
| Tmem202       | chr9:59518685-59525501    | 0.4343 | 0.1280 | -1.7620  | 0.439107 |
| Mir5133       | chr9:62122517-62122594    | 4.3703 | 0.7261 | -2.5895  | 0.241277 |
| Itga11        | chr9:62677825-62783982    | 0.0680 | 0.0660 | -0.0427  | 0.974431 |
| Gm24347       | chr9:64881783-64881925    | 2.8780 | 0.4654 | -2.6287  | 0.373529 |
| Ubap1l        | chr9:65361059-65380377    | 0.2960 | 0.2577 | -0.2001  | 0.919334 |
| Gm23428       | chr9:66360640-66360742    | 9.8829 | 0.7972 | -3.6319  | 0.324734 |
| Gm10647       | chr9:66797038-66799074    | 0.4149 | 0.1640 | -1.3394  | 0.555603 |
| Gm9719        | chr9:75098597-75099140    | 2.0071 | 0.1861 | -4.3507  | 0.330268 |
| Mei4          | chr9:81863669-82206007    | 0.1546 | 0.0359 | -2.1073  | 0.408189 |
| Mst1r         | chr9:107906888-107920383  | 0.0580 | 0.0139 | -2.0586  | 0.428045 |
| Gm24944       | chr9:107987368-107987496  | 5.3213 | 0.6433 | -3.0483  | 0.345147 |
| Mir425        | chr9:108568776-108568861  | 4.1669 | 4.8371 | 0.2152   | 0.877599 |
| Gm24259       | chr9:108738751-108738858  | 8.6572 | 0.0001 | -16.4016 | 0.285591 |
| Fam198a       | chr9:121950987-121980208  | 0.1139 | 0.0421 | -1.4375  | 0.378885 |
| Gm14884       | chrX:20459489-20459685    | 1.9461 | 0.0001 | -14.2483 | 0.285591 |
| Atp1b4        | chrX:38316183-38336769    | 0.1428 | 0.0001 | -10.4795 | 0.285591 |
| Gpr119        | chrX:48667978-48674478    | 0.1682 | 0.0901 | -0.9005  | 0.634741 |
| Gm14639       | chrX:56155527-56156393    | 1.5766 | 0.0618 | -4.6732  | 0.248993 |
| Snord61       | chrX:57391448-57391521    | 6.9297 | 0.5849 | -3.5666  | 0.268501 |
| F9            | chrX:59999463-60030759    | 0.2094 | 0.0060 | -5.1135  | 0.298305 |
| Gm22287       | chrX:60257551-60257658    | 4.8379 | 0.0001 | -15.5621 | 0.285591 |
| Fmr1nb        | chrX:68761838-68804567    | 0.7270 | 0.0175 | -5.3804  | 0.296192 |
| Gm22843       | chrX:78550745-78550879    | 8.8581 | 0.0987 | -6.4877  | 0.267121 |
| Gm14769       | chrX:84063332-84063764    | 1.1983 | 0.0001 | -13.5488 | 0.285591 |
| Gm8876        | chrX:88755573-88756695    | 0.3781 | 0.0119 | -4.9926  | 0.233400 |
| Eda           | chrX:99975605-100400762   | 0.1119 | 0.0156 | -2.8457  | 0.353068 |
| Gm14843       | chrX:101479347-101479559  | 3.3414 | 0.0001 | -15.0282 | 0.285591 |
| Gm9785        | chrX:103525315-103526330  | 0.7531 | 0.2532 | -1.5723  | 0.316045 |
| Gm14984       | chrX:130400956-130402219  | 0.3651 | 0.2506 | -0.5429  | 0.666858 |
| Gm15152       | chrX:151005869-151006528  | 1.5849 | 0.6502 | -1.2855  | 0.437782 |
| Gm5060        | chrX:154226500-154227099  | 1.0007 | 0.0001 | -13.2888 | 0.285591 |
| Gm15246       | chrX:169320621-169368190  | 0.7043 | 0.2900 | -1.2802  | 0.523427 |
| Gm21887       | chrX:170009658-170019281  | 0.8541 | 0.4745 | -0.8481  | 0.386724 |
| Grhl2         | chr15:37233035-37363569   | 0.2129 | 0.0073 | -4.8661  | 0.300860 |
| Oc90          | chr15:65876052-65912397   | 0.2851 | 0.0730 | -1.9655  | 0.420717 |
| Gm23747       | chr15:75759858-75759989   | 3.1197 | 0.4733 | -2.7204  | 0.362666 |
| Enthd1        | chr15:80452239-80560470   | 0.2601 | 0.0339 | -2.9376  | 0.245131 |
| Gm10923       | chr15:85116828-85117290   | 1.1094 | 0.0871 | -3.6702  | 0.255731 |
| Gm15722       | chr15:86087639-86090060   | 0.7387 | 0.3739 | -0.9823  | 0.461638 |
| Rabl2         | chr15:89582532-89591923   | 0.1566 | 0.1426 | -0.1346  | 0.933641 |
| Gm25070       | chr15:95879715-95879817   | 4.2737 | 1.0330 | -2.0486  | 0.430277 |
| A330009N23Rik | chr15:101221195-101224121 | 0.2768 | 0.3299 | 0.2536   | 0.813911 |
| Krt7          | chr15:101411042-101430313 | 0.1006 | 0.0070 | -3.8408  | 0.318421 |
| Mir148b       | chr15:103285124-103285221 | 5.6026 | 1.4985 | -1.9026  | 0.292098 |
| Ppp1r1a       | chr15:103530278-103537992 | 0.6102 | 0.2550 | -1.2587  | 0.532756 |
| Gm2897        | chr14:3049284-3076840     | 0.2604 | 0.0071 | -5.2041  | 0.163841 |
| Gm3252        | chr14:4726774-4747493     | 0.2508 | 0.0309 | -3.0209  | 0.343350 |
| Gm3383        | chr14:5607619-5807982     | 0.2975 | 0.1922 | -0.6303  | 0.576338 |
| B230110C06Rik | chr14:15437622-15452423   | 0.2386 | 0.0001 | -11.2206 | 0.285591 |
| Gm6781        | chr14:18531362-18532460   | 0.5956 | 0.3986 | -0.5795  | 0.745996 |
| Gm25328       | chr14:20701522-20701629   | 4.3630 | 3.9532 | -0.1423  | 0.909740 |
| Dusp13        | chr14:21733394-21751181   | 0.1751 | 0.0793 | -1.1420  | 0.373835 |
| Gm24031       | chr14:26497654-26497785   | 4.3675 | 0.0001 | -15.4145 | 0.285591 |
| Gm23633       | chr14:27380731-27380850   | 3.2053 | 4.6715 | 0.5434   | 0.726320 |
| 1700011H14Rik | chr14:49226357-49245428   | 0.4739 | 0.0859 | -2.4632  | 0.378115 |
| Olfir221      | chr14:52035081-52036143   | 0.6158 | 0.0001 | -12.5882 | 0.285591 |
| Trav3-4       | chr14:53776955-53777575   | 1.0345 | 0.3072 | -1.7515  | 0.384132 |
| Tgm1          | chr14:55700008-55713492   | 0.1191 | 0.0143 | -3.0586  | 0.183484 |
| Gm26440       | chr14:57697808-57697937   | 5.2800 | 0.7564 | -2.8033  | 0.361622 |
| Gata4         | chr14:63198921-63271692   | 0.1770 | 0.0194 | -3.1924  | 0.275388 |
| NA            | chr14:66937364-66938736   | 0.4568 | 0.0001 | -12.1574 | 0.285591 |
| Gm6254        | chr14:122117937-122119009 | 0.4267 | 0.0153 | -4.8044  | 0.271158 |
| Gm15425       | chr17:8564257-8568860     | 0.2024 | 0.0098 | -4.3616  | 0.205089 |
| Gm24794       | chr17:12301035-12301175   | 4.8652 | 0.5591 | -3.1214  | 0.342099 |

|               |                          |        |        |          |          |
|---------------|--------------------------|--------|--------|----------|----------|
| Gm7393        | chr17:14941964-14942703  | 0.6936 | 0.1026 | -2.7564  | 0.291175 |
| Gm5224        | chr17:22734962-22735380  | 1.0120 | 0.2063 | -2.2946  | 0.391045 |
| Gm22146       | chr17:28446860-28447148  | 1.8921 | 1.6872 | -0.1654  | 0.913444 |
| Pi16          | chr17:29318876-29329413  | 0.0875 | 0.0312 | -1.4871  | 0.469305 |
| Zfp811        | chr17:32797405-32800938  | 0.4608 | 0.1844 | -1.3209  | 0.548639 |
| Gm26940       | chr17:34024965-34025070  | 8.4854 | 1.2155 | -2.8035  | 0.259875 |
| Mir219a-1     | chr17:34024982-34025092  | 6.1183 | 1.5587 | -1.9727  | 0.286599 |
| Btnl2         | chr17:34354821-34369493  | 0.2650 | 0.1157 | -1.1961  | 0.480690 |
| Btnl4         | chr17:34469041-34475937  | 0.4023 | 0.1572 | -1.3562  | 0.512209 |
| H2-BI         | chr17:36080188-36084249  | 0.6036 | 0.0984 | -2.6171  | 0.348093 |
| Gm20478       | chr17:36167981-36171805  | 0.5617 | 0.1613 | -1.8002  | 0.182074 |
| Gm20546       | chr17:36248820-36253679  | 0.3751 | 0.0926 | -2.0177  | 0.416141 |
| Gm5093        | chr17:46439577-46440099  | 0.6969 | 0.4579 | -0.6060  | 0.637682 |
| Mdfi          | chr17:47815327-47834691  | 0.0882 | 0.0001 | -9.7848  | 0.285591 |
| Gm17168       | chr17:57041774-57047143  | 1.0096 | 1.4675 | 0.5395   | 0.739336 |
| Fer           | chr17:63896017-64139494  | 0.1553 | 0.3707 | 1.2551   | 0.632469 |
| Arhgap28      | chr17:67842712-68004120  | 0.0558 | 0.0397 | -0.4928  | 0.779095 |
| Gm25069       | chr17:78302660-78302746  | 3.1681 | 0.0001 | -14.9513 | 0.285591 |
| Tekt5         | chr16:10357947-10395490  | 0.2263 | 0.0091 | -4.6362  | 0.303717 |
| Gm15558       | chr16:10669247-10683539  | 0.5131 | 0.1830 | -1.4871  | 0.488770 |
| Gm24145       | chr16:11167104-11167267  | 3.5327 | 0.6049 | -2.5459  | 0.272260 |
| Gm9961        | chr16:11901362-11930600  | 1.2453 | 0.2525 | -2.3022  | 0.386702 |
| Pkp2          | chr16:16213317-16272712  | 0.0640 | 0.0521 | -0.2963  | 0.837058 |
| Vpreb1        | chr16:16868401-16870843  | 0.7624 | 0.2111 | -1.8523  | 0.323173 |
| Iglv1         | chr16:19085016-19085460  | 1.2420 | 0.0377 | -5.0403  | 0.299192 |
| Gm4943        | chr16:22053509-22053935  | 1.2152 | 0.2441 | -2.3157  | 0.389185 |
| Gp5           | chr16:30307685-30310779  | 0.3847 | 0.1337 | -1.5251  | 0.496005 |
| Gm15575       | chr16:38748728-38750309  | 0.2069 | 0.1753 | -0.2387  | 0.899406 |
| Gm4737        | chr16:46152996-46155077  | 0.1646 | 0.1359 | -0.2770  | 0.857041 |
| Gm23513       | chr16:52105014-52105147  | 4.0970 | 1.2738 | -1.6854  | 0.451055 |
| Gm15554       | chr16:75772158-75773071  | 0.6840 | 0.5056 | -0.4361  | 0.781736 |
| Lca5l         | chr16:96158406-96192257  | 0.0461 | 0.0142 | -1.6960  | 0.460405 |
| Tmprss2       | chr16:97564683-97611195  | 0.0950 | 0.1108 | 0.2221   | 0.898238 |
| Snord89       | chr1:39548744-39548854   | 4.4382 | 4.6177 | 0.0572   | 0.951443 |
| Col5a2        | chr1:45374320-45503282   | 0.0484 | 0.0182 | -1.4143  | 0.498069 |
| Ccdc150       | chr1:54250682-54368727   | 0.3257 | 0.0497 | -2.7110  | 0.360381 |
| Gm11609       | chr1:60792489-60793832   | 0.5006 | 0.5906 | 0.2386   | 0.822174 |
| Cyp27a1       | chr1:74713573-74737890   | 0.2105 | 0.2803 | 0.4131   | 0.673711 |
| Col4a4        | chr1:82452557-82586849   | 0.1137 | 0.0267 | -2.0897  | 0.407256 |
| Pigr          | chr1:130826683-130852249 | 0.0949 | 0.0502 | -0.9192  | 0.637106 |
| Il24          | chr1:130882073-130887454 | 0.5408 | 0.0343 | -3.9786  | 0.315489 |
| Gm25549       | chr1:131073657-131073751 | 6.6663 | 2.2978 | -1.5366  | 0.482557 |
| Lrrn2         | chr1:132880272-132940005 | 0.1138 | 0.0001 | -10.1520 | 0.285591 |
| Plekha6       | chr1:133246096-133303435 | 0.0807 | 0.0521 | -0.6316  | 0.579986 |
| Chit1         | chr1:134111241-134151540 | 0.2102 | 0.0001 | -11.0379 | 0.285591 |
| Gm15850       | chr1:136126177-136131183 | 0.2793 | 0.1237 | -1.1746  | 0.553480 |
| Gm25663       | chr1:143778927-143779062 | 7.5652 | 0.9713 | -2.9614  | 0.248362 |
| Pla2g4a       | chr1:149829617-149961290 | 0.0598 | 0.0214 | -1.4802  | 0.494062 |
| Tnn           | chr1:160085035-160153580 | 0.0600 | 0.0538 | -0.1580  | 0.922416 |
| Dnm3os        | chr1:162217622-162225550 | 0.0551 | 0.0042 | -3.7125  | 0.321469 |
| Fcrla         | chr1:170917575-170927583 | 0.5465 | 0.1992 | -1.4564  | 0.499105 |
| Atp1a2        | chr1:172271708-172298064 | 0.0885 | 0.0755 | -0.2285  | 0.880160 |
| Snora36b      | chr1:185242906-185243038 | 2.2705 | 0.0001 | -14.4707 | 0.285591 |
| Prox1         | chr1:190118037-190170680 | 0.1689 | 0.0488 | -1.7916  | 0.422323 |
| 1700123101Rik | chr19:6184387-6224225    | 0.3321 | 0.0001 | -11.6976 | 0.285591 |
| Fads2         | chr19:10064163-10101503  | 0.3072 | 0.0792 | -1.9553  | 0.421401 |
| Apba1         | chr19:23758875-23949597  | 0.0453 | 0.0601 | 0.4089   | 0.783267 |
| Pip5k1bos     | chr19:24416008-24430329  | 0.6772 | 0.2313 | -1.5501  | 0.478114 |
| Kazald1       | chr19:45075240-45079289  | 0.3159 | 0.3117 | -0.0192  | 0.986281 |
| Gm8974        | chr19:46205379-46205858  | 0.9670 | 0.6001 | -0.6884  | 0.698097 |
| Gm24724       | chr19:53159756-53159863  | 9.6757 | 0.4275 | -4.5003  | 0.305395 |
| Adrb1         | chr19:56722371-56724862  | 0.2741 | 0.1793 | -0.6126  | 0.582737 |
| Gm21747       | chr18:10781722-10785883  | 0.6898 | 0.7682 | 0.1553   | 0.909827 |
| Psm8          | chr18:14706150-14762299  | 0.7125 | 0.0594 | -3.5855  | 0.228140 |
| Gm4835        | chr18:15988367-15989339  | 0.4153 | 0.3383 | -0.2957  | 0.851725 |
| Myo7b         | chr18:31959233-32036961  | 0.0865 | 0.0001 | -9.7568  | 0.285591 |
| Gm22814       | chr18:33004662-33004766  | 5.5014 | 1.3878 | -1.9870  | 0.421604 |
| Gm3550        | chr18:34736358-34738014  | 0.2104 | 0.0205 | -3.3580  | 0.290373 |
| Gm22791       | chr18:46985336-46985481  | 5.6369 | 0.1122 | -5.6502  | 0.294368 |
| Pdgfrb        | chr18:61045149-61085061  | 0.1045 | 0.0097 | -3.4228  | 0.331216 |
| Afap111       | chr18:61730260-61786702  | 0.4051 | 0.0873 | -2.2137  | 0.336370 |

|               |                          |         |        |          |          |
|---------------|--------------------------|---------|--------|----------|----------|
| Snord58b      | chr18:75001057-75001123  | 7.4304  | 1.1396 | -2.7049  | 0.362024 |
| Hsbp1l1       | chr18:80229757-80247102  | 0.3656  | 0.0472 | -2.9529  | 0.317008 |
| Itih2         | chr2:10094592-10131396   | 0.3042  | 0.0050 | -5.9254  | 0.292664 |
| Mir467c       | chr2:10473930-10474027   | 5.0558  | 0.1363 | -5.2129  | 0.297615 |
| Mir669g       | chr2:10477149-10477272   | 5.5675  | 0.9917 | -2.4891  | 0.298192 |
| Gm25451       | chr2:10480364-10480485   | 3.3775  | 0.4920 | -2.7791  | 0.355901 |
| Mir467b       | chr2:10481247-10481320   | 8.2107  | 0.3779 | -4.4415  | 0.306760 |
| Gm25753       | chr2:10502390-10502511   | 4.2781  | 1.1677 | -1.8734  | 0.436967 |
| Mir669a-12    | chr2:10503786-10503883   | 4.4940  | 0.0001 | -15.4557 | 0.285591 |
| Gm22051       | chr2:10506554-10506681   | 4.7196  | 3.4923 | -0.4345  | 0.828630 |
| Gm25263       | chr2:10509884-10509984   | 4.3592  | 1.5491 | -1.4927  | 0.485713 |
| Gm22239       | chr2:10510460-10510563   | 8.6502  | 0.1340 | -6.0127  | 0.198635 |
| Mir466n       | chr2:10513740-10513834   | 5.5069  | 0.0001 | -15.7490 | 0.285591 |
| Mir669i       | chr2:10517603-10517730   | 3.4325  | 2.1671 | -0.6635  | 0.749141 |
| Gm13333       | chr2:18758983-18759764   | 0.5931  | 0.3002 | -0.9823  | 0.609980 |
| Gm22572       | chr2:25208622-25208727   | 4.4461  | 4.3462 | -0.0328  | 0.981751 |
| Gm13554       | chr2:26059009-26060275   | 1.2891  | 0.8079 | -0.6741  | 0.726367 |
| Aif1l         | chr2:31950259-31973442   | 0.0767  | 0.0879 | 0.1962   | 0.911052 |
| Gm13442       | chr2:31961689-31962547   | 0.4521  | 0.0001 | -12.1425 | 0.285591 |
| Gm13406       | chr2:34436326-34436582   | 2.7958  | 0.1271 | -4.4589  | 0.152996 |
| Gm22867       | chr2:44428934-44429043   | 5.2490  | 0.0001 | -15.6798 | 0.285591 |
| Mir5129       | chr2:45023099-45023177   | 3.8423  | 2.3300 | -0.7216  | 0.723206 |
| Gm13510       | chr2:49185017-49185446   | 1.2702  | 0.7882 | -0.6884  | 0.681572 |
| Gm25223       | chr2:49906770-49906880   | 4.2106  | 0.8870 | -2.2470  | 0.407349 |
| Tbr1          | chr2:61802929-61814114   | 0.1047  | 0.0186 | -2.4903  | 0.158603 |
| Gm25960       | chr2:72950862-72950987   | 4.7951  | 1.8764 | -1.3536  | 0.525870 |
| Osbp16        | chr2:76406507-76600647   | 0.0550  | 0.0211 | -1.3817  | 0.510794 |
| Gm4735        | chr2:80837126-80838762   | 0.1797  | 0.1287 | -0.4815  | 0.772789 |
| Gm17281       | chr2:91250742-91255995   | 0.1199  | 0.0256 | -2.2286  | 0.366633 |
| Snord67       | chr2:91596069-91596180   | 3.7149  | 0.5037 | -2.8827  | 0.212787 |
| 4930500J02Rik | chr2:104559162-104571429 | 0.2589  | 0.0176 | -3.8816  | 0.317695 |
| Gm13982       | chr2:117414391-117417697 | 0.5775  | 0.0432 | -3.7415  | 0.321469 |
| NA            | chr2:127269708-127270032 | 1.1773  | 0.2228 | -2.4016  | 0.382276 |
| Ebf4          | chr2:130295168-130370481 | 0.1348  | 0.0202 | -2.7385  | 0.365429 |
| Gm14042       | chr2:130400436-130401269 | 0.3926  | 0.4376 | 0.1565   | 0.942403 |
| Tmem239       | chr2:130406477-130407899 | 0.3597  | 0.0940 | -1.9360  | 0.429445 |
| Gm14104       | chr2:132845998-132847256 | 1.0715  | 0.8184 | -0.3887  | 0.813402 |
| MacroD2       | chr2:140395308-142392966 | 0.0371  | 0.0135 | -1.4622  | 0.499988 |
| Gm11701       | chr2:144364126-144365627 | 0.6919  | 0.1713 | -2.0140  | 0.429825 |
| Gm22731       | chr2:145352842-145352936 | 4.9273  | 0.7678 | -2.6821  | 0.362872 |
| Gm14150       | chr2:151458955-151460309 | 0.6353  | 0.0446 | -3.8324  | 0.284338 |
| Rspo4os       | chr2:151865314-151866960 | 0.4680  | 0.1226 | -1.9326  | 0.422183 |
| Gm14238       | chr2:155486046-155486369 | 2.4462  | 0.0428 | -5.8371  | 0.293260 |
| Fer1l4        | chr2:156019138-156052947 | 0.0949  | 0.0243 | -1.9665  | 0.426428 |
| Gm11447       | chr2:160845612-160846470 | 0.7871  | 0.3886 | -1.0181  | 0.591247 |
| L3mbt1l       | chr2:162943471-162974522 | 0.1560  | 0.0764 | -1.0309  | 0.602322 |
| Sipi          | chr2:164354069-164389095 | 0.2541  | 0.6328 | 1.3164   | 0.204541 |
| Ppp1r3d       | chr2:178411205-178414472 | 0.2357  | 0.0101 | -4.5511  | 0.107964 |
| 4933429H19Rik | chr3:30793137-30793560   | 1.2709  | 1.0545 | -0.2693  | 0.801139 |
| Ccdc144b      | chr3:36007246-36053547   | 0.1050  | 0.0069 | -3.9363  | 0.141738 |
| Fgf2os        | chr3:37335331-37349740   | 0.2081  | 0.2128 | 0.0325   | 0.985282 |
| Gm23077       | chr3:104201109-104201225 | 7.2809  | 1.3670 | -2.4131  | 0.391153 |
| Cttnbp2nl     | chr3:105001914-105053146 | 0.0818  | 0.0231 | -1.8267  | 0.440946 |
| Gm17494       | chr3:122257090-122293547 | 0.9309  | 0.4463 | -1.0605  | 0.313237 |
| Mir760        | chr3:122293584-122293703 | 6.6395  | 0.2222 | -4.9013  | 0.300675 |
| Gm15460       | chr3:137905008-137905399 | 1.6027  | 0.2704 | -2.5671  | 0.378192 |
| Gm11874       | chr4:16120758-16120888   | 3.5628  | 0.9070 | -1.9739  | 0.423117 |
| Gm11941       | chr4:32892685-32893295   | 0.4467  | 0.1227 | -1.8648  | 0.436093 |
| Gm11935       | chr4:33452490-33452889   | 1.4820  | 1.1709 | -0.3399  | 0.776429 |
| Gm12397       | chr4:40912740-40913355   | 0.7975  | 0.1439 | -2.4707  | 0.377024 |
| Mir3094       | chr4:40993694-40993758   | 5.2579  | 3.4232 | -0.6191  | 0.698045 |
| Gm24837       | chr4:41211501-41211582   | 11.3633 | 1.6940 | -2.7459  | 0.345013 |
| Gm12472       | chr4:43588071-43608755   | 0.4303  | 0.0748 | -2.5233  | 0.376383 |
| Gm12503       | chr4:44092631-44109311   | 0.1892  | 0.0952 | -0.9902  | 0.477707 |
| Gm12409       | chr4:45762376-45764223   | 1.1171  | 0.5023 | -1.1531  | 0.422547 |
| 4933430I17Rik | chr4:62525368-62547993   | 0.3974  | 0.1232 | -1.6893  | 0.460257 |
| Gm12418       | chr4:84915895-84916837   | 0.4050  | 0.2318 | -0.8049  | 0.679904 |
| Gm13282       | chr4:88707908-88708453   | 0.9499  | 0.4595 | -1.0478  | 0.611753 |
| Cyp2j13       | chr4:96027533-96077546   | 0.0640  | 0.0161 | -1.9878  | 0.422128 |
| Gm25827       | chr4:108521923-108522030 | 3.3996  | 3.7603 | 0.1455   | 0.916465 |
| Gm23743       | chr4:109160923-109161197 | 1.1933  | 0.2517 | -2.2450  | 0.407525 |



|               |                           |        |         |          |          |
|---------------|---------------------------|--------|---------|----------|----------|
| 4930538K18Rik | chr4:119205106-119218217  | 0.4702 | 0.2919  | -0.6878  | 0.586571 |
| Gm12891       | chr4:122925832-122926072  | 1.3378 | 1.3324  | -0.0058  | 0.997123 |
| Gm25600       | chr4:127108465-127108571  | 6.6827 | 1.7449  | -1.9373  | 0.422950 |
| Spocd1        | chr4:129947546-129957115  | 0.1343 | 0.0001  | -10.3913 | 0.285591 |
| Gm25707       | chr4:132408308-132408404  | 4.8246 | 3.1949  | -0.5946  | 0.727307 |
| NA            | chr4:133527730-133529326  | 0.4269 | 0.0370  | -3.5268  | 0.325830 |
| Gm22523       | chr4:133883398-133883498  | 4.9041 | 1.0102  | -2.2793  | 0.398755 |
| C1qc          | chr4:136889803-136893065  | 0.2400 | 0.0580  | -2.0487  | 0.417251 |
| Gm23834       | chr4:137025683-137025812  | 5.2800 | 0.2522  | -4.3879  | 0.307618 |
| Ubxn10        | chr4:138709836-138737167  | 0.1075 | 0.0001  | -10.0708 | 0.285591 |
| Tmem82        | chr4:141613375-141618633  | 0.1230 | 0.0909  | -0.4361  | 0.792595 |
| Tmem51os1     | chr4:142083971-142088099  | 0.0766 | 0.0390  | -0.9731  | 0.602977 |
| Gm13231       | chr4:145641356-145644399  | 0.3156 | 0.0142  | -4.4729  | 0.305610 |
| Gm21411       | chr4:146892405-146909590  | 0.4723 | 0.1890  | -1.3213  | 0.520184 |
| Gm26624       | chr4:147136277-147457019  | 0.1013 | 0.1423  | 0.4906   | 0.823061 |
| Gm13207       | chr4:148031553-148032326  | 1.6538 | 0.2429  | -2.7671  | 0.304206 |
| Ube4bos2      | chr4:149338086-149338531  | 1.1174 | 0.5483  | -1.0270  | 0.596646 |
| Gm16024       | chr4:155616408-155616787  | 3.4363 | 2.2698  | -0.5983  | 0.685784 |
| Sash1         | chr10:8722218-8886070     | 0.0179 | 0.0796  | 2.1495   | 0.340337 |
| Oit3          | chr10:59422957-59441778   | 0.0643 | 0.1980  | 1.6230   | 0.310356 |
| Lrrc75b       | chr10:75550124-75560330   | 0.0419 | 0.0538  | 0.3612   | 0.849426 |
| Gm16220       | chr10:75992690-75993992   | 0.0001 | 0.3264  | 11.6722  | 0.436588 |
| Aire          | chr10:78030021-78043610   | 0.0555 | 0.0725  | 0.3841   | 0.769358 |
| Madcam1       | chr10:79664573-79668536   | 0.0001 | 0.1215  | 10.2464  | 0.389106 |
| Gm22721       | chr10:80382301-80382384   | 1.2421 | 10.7285 | 3.1106   | 0.087315 |
| D630029K05Rik | chr10:116964706-116969105 | 0.0315 | 0.2316  | 2.8769   | 0.008553 |
| Gm20492       | chr10:127288513-127289681 | 0.5227 | 1.4375  | 1.4595   | 0.298125 |
| Apon          | chr10:128254130-128255901 | 0.0001 | 0.4342  | 12.0841  | 0.165644 |
| Gm26347       | chr10:128435913-128436044 | 0.4891 | 6.0891  | 3.6380   | 0.002866 |
| Gm12035       | chr11:20574566-20575189   | 0.0001 | 0.3560  | 11.7975  | 0.198247 |
| Acyp2         | chr11:30505990-30649587   | 0.2228 | 0.7247  | 1.7018   | 0.201412 |
| Gm12104       | chr11:30906941-30907920   | 0.2227 | 0.5712  | 1.3588   | 0.346626 |
| Sh3pxd2b      | chr11:32347819-32428173   | 0.0157 | 0.0242  | 0.6208   | 0.726360 |
| Wwc1          | chr11:35838399-35980527   | 0.0173 | 0.0712  | 2.0393   | 0.156074 |
| Gm12184       | chr11:48825345-48826655   | 0.0653 | 0.2948  | 2.1745   | 0.220786 |
| Rps2-ps4      | chr11:53645743-53646376   | 0.1874 | 0.4310  | 1.2019   | 0.504471 |
| Gm12253       | chr11:58432558-58441622   | 0.0001 | 0.1583  | 10.6280  | 0.391660 |
| Rasd1         | chr11:59963180-59964944   | 0.0531 | 0.3309  | 2.6392   | 0.108638 |
| Dnah2         | chr11:69420808-69549110   | 0.0001 | 0.0137  | 7.0968   | 0.388624 |
| Tnk1          | chr11:69851004-69858730   | 0.0578 | 0.2291  | 1.9864   | 0.076986 |
| Bcl6b         | chr11:70224127-70229798   | 0.0001 | 0.1174  | 10.1969  | 0.201194 |
| Zmynd15       | chr11:70459432-70466202   | 0.0098 | 0.2009  | 4.3593   | 0.048518 |
| Z210008F06Rik | chr11:77489853-77491409   | 0.0001 | 0.3212  | 11.6492  | 0.079860 |
| Rab11fip4os2  | chr11:79670371-79675128   | 0.1480 | 0.3487  | 1.2358   | 0.494454 |
| Gm22311       | chr11:83764637-83764747   | 2.4567 | 1.6448  | -0.5789  | 0.658626 |
| NA            | chr11:87471367-87471581   | 0.4990 | 2.6750  | 2.4224   | 0.078774 |
| Gm11592       | chr11:97280127-97282897   | 0.0001 | 1.1486  | 13.4876  | 0.019416 |
| Arhgap23      | chr11:97415532-97502402   | 0.0001 | 0.0454  | 8.8272   | 0.062090 |
| Gm11633       | chr11:97968791-97969235   | 0.0963 | 0.8311  | 3.1096   | 0.385961 |
| Gm23451       | chr11:99017030-99017152   | 0.0001 | 3.8296  | 15.2249  | 0.141887 |
| Rnu2-10       | chr11:101658237-101658428 | 1.0063 | 1.9185  | 0.9310   | 0.458979 |
| Mdk-ps1       | chr11:102545701-102546022 | 0.0001 | 0.4958  | 12.2757  | 0.385043 |
| Wipi1         | chr11:109573330-109611967 | 0.0310 | 0.1681  | 2.4394   | 0.095870 |
| Kif19a        | chr11:114765387-114790739 | 0.0316 | 0.1495  | 2.2424   | 0.190736 |
| Fn3k          | chr11:121434912-121450491 | 0.0195 | 0.0509  | 1.3839   | 0.502458 |
| Gm12586       | chr11:121856772-121861227 | 0.0163 | 0.4169  | 4.6745   | 0.153839 |
| Gm25821       | chr12:21287926-21288059   | 1.4174 | 4.4218  | 1.6414   | 0.176147 |
| Fam110c       | chr12:31073967-31079937   | 0.0606 | 0.1098  | 0.8583   | 0.480841 |
| Gm5434        | chr12:36090378-36091829   | 0.2916 | 0.3556  | 0.2863   | 0.673689 |
| Stxbp6        | chr12:44852487-45074493   | 0.0221 | 0.1479  | 2.7427   | 0.305484 |
| Gm24233       | chr12:59134071-59134193   | 1.8952 | 3.9234  | 1.0498   | 0.334342 |
| Smoc1         | chr12:81026807-81186414   | 0.0001 | 0.1399  | 10.4506  | 0.436588 |
| Hspe1-ps2     | chr12:81399811-81400123   | 0.7183 | 0.5278  | -0.4446  | 0.813401 |
| Flrt2         | chr12:95692225-95785215   | 0.0056 | 0.1162  | 4.3671   | 0.246480 |
| Ppp4r4        | chr12:103532564-103613832 | 0.0349 | 0.1865  | 2.4182   | 0.081607 |
| Gm17032       | chr12:106327367-106330821 | 0.3160 | 1.0134  | 1.6813   | 0.213798 |
| Meg3          | chr12:109541000-109571726 | 0.0072 | 0.0278  | 1.9534   | 0.224160 |
| Mirg          | chr12:109729763-109749460 | 0.0001 | 0.0947  | 9.8872   | 0.094491 |
| A230087F16Rik | chr12:111284761-111293988 | 0.0564 | 0.0916  | 0.7004   | 0.626934 |
| Tmem121       | chr12:113185902-113189520 | 0.2560 | 0.2294  | -0.1581  | 0.875414 |
| Igha          | chr12:113258767-113260236 | 0.0621 | 0.6882  | 3.4712   | 0.368421 |

|               |                           |         |         |         |          |
|---------------|---------------------------|---------|---------|---------|----------|
| Ighd4-1       | chr12:113430527-113430538 | 13.5882 | 34.2635 | 1.3343  | 0.342243 |
| Ighv8-12      | chr12:115647960-115648361 | 0.0001  | 0.6712  | 12.7126 | 0.436588 |
| Gm16710       | chr12:115802647-115803080 | 0.0001  | 0.4557  | 12.1540 | 0.436588 |
| Vdac3-ps1     | chr13:18030323-18031629   | 0.2590  | 0.2262  | -0.1953 | 0.865737 |
| Amph          | chr13:18948370-19150913   | 0.0001  | 0.0978  | 9.9340  | 0.229798 |
| Tcrg-V1       | chr13:19340015-19340454   | 0.1847  | 1.7130  | 3.2132  | 0.125112 |
| Gm5446        | chr13:19995020-19995803   | 0.0001  | 0.5363  | 12.3887 | 0.009916 |
| AK157302      | chr13:21495222-21497146   | 0.0001  | 0.3604  | 11.8155 | 0.037064 |
| AK157302      | chr13:21495305-21495695   | 0.0001  | 1.7439  | 14.0900 | 0.037058 |
| Gmpr          | chr13:45507443-45546382   | 0.0458  | 0.2306  | 2.3333  | 0.171455 |
| Omd           | chr13:49582765-49592609   | 0.0001  | 0.2668  | 11.3818 | 0.085441 |
| Hist1h2al     | chr13:51202687-51203065   | 0.4579  | 1.4472  | 1.6602  | 0.088753 |
| 6720489N17Rik | chr13:62605189-62607499   | 0.0001  | 1.9416  | 14.2450 | 0.212181 |
| Ahrr          | chr13:74211117-74292331   | 0.0070  | 0.0879  | 3.6565  | 0.097098 |
| Gm8546        | chr13:89577154-89578413   | 0.0001  | 0.6402  | 12.6442 | 0.156003 |
| Gm17450       | chr13:91220451-91220878   | 0.2162  | 1.1258  | 2.3803  | 0.260881 |
| Lhfp12        | chr13:94057795-94195409   | 0.0001  | 0.0667  | 9.3808  | 0.028254 |
| Gareml        | chr5:30105160-30118378    | 0.0001  | 0.1622  | 10.6638 | 0.127734 |
| Gm10059       | chr5:33759365-33759536    | 0.9086  | 1.8926  | 1.0586  | 0.411273 |
| Gm15650       | chr5:35722554-35724485    | 0.4662  | 0.6307  | 0.4362  | 0.657573 |
| Gm25767       | chr5:36671657-36671781    | 0.5704  | 5.7009  | 3.3211  | 0.027226 |
| Gm5867        | chr5:69461150-69461741    | 0.0362  | 1.5154  | 5.3864  | 0.112795 |
| Ppof2         | chr5:92226973-92253159    | 0.0470  | 0.1765  | 1.9074  | 0.222640 |
| Cxcl9         | chr5:92321330-92328079    | 0.0001  | 0.0683  | 9.4163  | 0.436588 |
| Cxcl11        | chr5:92359543-92365485    | 0.0001  | 0.0427  | 8.7379  | 0.376461 |
| Gm2986        | chr5:93195797-93196179    | 0.9221  | 1.5758  | 0.7731  | 0.490570 |
| 4930458D05Rik | chr5:100840796-100847167  | 0.0001  | 0.1977  | 10.9488 | 0.120005 |
| Gm15788       | chr5:110262160-110277267  | 0.0918  | 0.5720  | 2.6387  | 0.234470 |
| Dao           | chr5:114003702-114025449  | 0.0177  | 0.2132  | 3.5933  | 0.129726 |
| Fam222a       | chr5:114568015-114613220  | 0.0613  | 0.1846  | 1.5911  | 0.133901 |
| Gm13827       | chr5:115053420-115053846  | 0.2162  | 1.6104  | 2.8968  | 0.098465 |
| Gm10399       | chr5:117318744-117319242  | 0.0430  | 1.3165  | 4.9369  | 0.160664 |
| Rph3a         | chr5:120940501-121009518  | 0.0001  | 0.0496  | 8.9542  | 0.340164 |
| Gm15860       | chr5:123334331-123344437  | 0.1600  | 0.6910  | 2.1106  | 0.236463 |
| Pitpnm2os1    | chr5:124229724-124237137  | 0.1057  | 0.3971  | 1.9098  | 0.174460 |
| Gm23171       | chr5:124257762-124258026  | 0.4854  | 2.7967  | 2.5265  | 0.406125 |
| Mmp17         | chr5:129584168-129608875  | 0.0293  | 0.1660  | 2.5045  | 0.116946 |
| Cldn4         | chr5:134945125-134946934  | 0.0620  | 0.1533  | 1.3051  | 0.488282 |
| Gm15607       | chr5:135637138-135637496  | 0.0783  | 2.0379  | 4.7011  | 0.105760 |
| Styx1         | chr5:135747219-135778385  | 0.0484  | 0.3769  | 2.9625  | 0.119738 |
| Cldn15        | chr5:136966615-136975858  | 0.0504  | 0.3192  | 2.6639  | 0.198726 |
| Serpine1      | chr5:137061503-137072272  | 0.0001  | 0.2322  | 11.1814 | 0.011956 |
| A630081J09Rik | chr5:137208812-137212389  | 0.0569  | 0.4029  | 2.8249  | 0.017067 |
| Fam20c        | chr5:138754513-138810077  | 0.0001  | 0.1264  | 10.3040 | 0.243025 |
| Gm15411       | chr5:148995650-149015813  | 0.0681  | 0.1660  | 1.2863  | 0.321477 |
| Gm15408       | chr5:149006961-149012776  | 0.0749  | 0.1595  | 1.0914  | 0.461799 |
| Gm9047        | chr6:29471436-29473465    | 0.1599  | 1.0652  | 2.7360  | 0.082102 |
| Strip2        | chr6:29917012-29959681    | 0.0165  | 0.0796  | 2.2733  | 0.174406 |
| Gm25580       | chr6:30143800-30144127    | 0.7118  | 1.2587  | 0.8224  | 0.351281 |
| Cpa2          | chr6:30541581-30564476    | 0.0400  | 0.1564  | 1.9676  | 0.201349 |
| Gm13834       | chr6:31087608-31087912    | 1.6179  | 5.7352  | 1.8258  | 0.263822 |
| Gm13858       | chr6:34379466-34380445    | 0.0001  | 0.2455  | 11.2614 | 0.316607 |
| 2010107G12Rik | chr6:34945277-34979054    | 0.0309  | 0.1962  | 2.6666  | 0.117036 |
| Ttc26         | chr6:38381468-38427647    | 0.0367  | 0.0447  | 0.2868  | 0.855477 |
| Tas2r108      | chr6:40493591-40494485    | 0.0001  | 0.1843  | 10.8477 | 0.316607 |
| Zfp786        | chr6:47819265-47830867    | 0.0469  | 0.1196  | 1.3489  | 0.359249 |
| Gm15572       | chr6:52843108-52843701    | 0.0001  | 0.7357  | 12.8450 | 0.078549 |
| Igkv14-111    | chr6:68256403-68256869    | 0.5445  | 1.9428  | 1.8351  | 0.258483 |
| Gm25436       | chr6:68257393-68257538    | 1.0309  | 2.0118  | 0.9645  | 0.571869 |
| Igkv5-39      | chr6:69900423-69900710    | 0.0001  | 5.4824  | 15.7425 | 0.234527 |
| Igkv3-4       | chr6:70671788-70672377    | 0.0001  | 0.7362  | 12.8459 | 0.436588 |
| Egr4          | chr6:85511130-85513589    | 0.0794  | 0.1503  | 0.9216  | 0.539661 |
| Gm9769        | chr6:85843868-85845372    | 0.0285  | 0.3385  | 3.5705  | 0.075261 |
| Asprv1        | chr6:86628173-86629702    | 0.0001  | 0.1503  | 10.5539 | 0.211629 |
| Ccdc37        | chr6:90403735-90428797    | 0.0056  | 0.0757  | 3.7458  | 0.166039 |
| Pdzrn3        | chr6:101149608-101377897  | 0.0001  | 0.0717  | 9.4850  | 0.136152 |
| 1700015O11Rik | chr6:113631644-113633144  | 0.2193  | 0.4868  | 1.1506  | 0.488660 |
| Ret           | chr6:118151747-118197744  | 0.0030  | 0.0538  | 4.1609  | 0.268155 |
| Cecr2         | chr6:120666368-120771190  | 0.0001  | 0.0518  | 9.0169  | 0.033966 |
| Gm5883        | chr6:123218952-123219447  | 0.1683  | 0.6591  | 1.9694  | 0.107267 |
| Ltbr          | chr6:125306570-125313885  | 0.0239  | 0.3946  | 4.0452  | 0.056566 |

|               |                          |        |         |         |          |
|---------------|--------------------------|--------|---------|---------|----------|
| Clec2f        | chr6:129018581-129020519 | 0.3486 | 0.4792  | 0.4590  | 0.797383 |
| Gprc5a        | chr6:135065650-135084709 | 0.0514 | 0.3028  | 2.5598  | 0.270340 |
| 1700034J05Rik | chr6:146950328-146954422 | 0.0569 | 0.1585  | 1.4775  | 0.410981 |
| Gm6288        | chr6:147442801-147476046 | 0.0738 | 0.5667  | 2.9402  | 0.125418 |
| Rps4l         | chr6:148354655-148355598 | 0.0001 | 0.7341  | 12.8418 | 0.351476 |
| Gm10011       | chr6:149147518-149147865 | 0.4952 | 1.5132  | 1.6114  | 0.401095 |
| Cox6b2        | chr7:4751791-4753094     | 0.0001 | 0.4108  | 12.0041 | 0.154289 |
| Gm4879        | chr7:13178902-13180174   | 0.0337 | 0.3475  | 3.3674  | 0.180349 |
| Ppp1r13l      | chr7:19359748-19378533   | 0.0001 | 0.0650  | 9.3435  | 0.309853 |
| A930016O22Rik | chr7:19418811-19421417   | 0.0177 | 0.5170  | 4.8692  | 0.046468 |
| Pvrl2         | chr7:19716643-19749573   | 0.0001 | 0.1531  | 10.5798 | 0.147711 |
| Ltbp4         | chr7:27305135-27337692   | 0.0170 | 0.0934  | 2.4616  | 0.027421 |
| Hipk4         | chr7:27523266-27531175   | 0.0001 | 0.0734  | 9.5205  | 0.090561 |
| Spred3        | chr7:29158828-29169841   | 0.0694 | 0.1095  | 0.6575  | 0.381993 |
| Ppp1r14a      | chr7:29289319-29293390   | 0.0001 | 0.3848  | 11.9100 | 0.340164 |
| Thap8         | chr7:30280093-30290237   | 0.0903 | 0.5085  | 2.4938  | 0.124142 |
| Gm26526       | chr7:39588517-39591679   | 0.0170 | 0.0886  | 2.3855  | 0.298489 |
| Gm2058        | chr7:39588930-39589717   | 0.0895 | 0.4107  | 2.1977  | 0.339808 |
| Igln5         | chr7:43472906-43490075   | 0.0001 | 0.1135  | 10.1481 | 0.163738 |
| Klk1b9        | chr7:43976060-43980376   | 0.0737 | 1.0261  | 3.7988  | 0.283652 |
| Gm15396       | chr7:44579967-44590624   | 0.0001 | 0.4127  | 12.0109 | 0.080212 |
| Fcgrt         | chr7:45092992-45103822   | 0.0984 | 0.3553  | 1.8524  | 0.223646 |
| Mir150        | chr7:45121756-45121821   | 1.2929 | 9.2952  | 2.8458  | 0.167253 |
| Syng4         | chr7:45885221-45896714   | 0.0854 | 0.5300  | 2.6332  | 0.115039 |
| A830073O21Rik | chr7:73738892-73740917   | 0.0136 | 0.3991  | 4.8799  | 0.125188 |
| Gm10161       | chr7:75366054-75366264   | 0.3051 | 1.3330  | 2.1271  | 0.183517 |
| Tenn4         | chr7:96171243-96911093   | 0.0001 | 0.0120  | 6.9094  | 0.212662 |
| Gm5900        | chr7:104949175-104950441 | 0.0338 | 0.1253  | 1.8894  | 0.570589 |
| Gm8989        | chr7:106328924-106330688 | 0.0001 | 0.3737  | 11.8677 | 0.159726 |
| Gm15994       | chr7:113324257-113324659 | 0.0001 | 1.3335  | 13.7030 | 0.112270 |
| Gm14388       | chr7:122442022-122442499 | 0.0001 | 1.8282  | 14.1581 | 0.147913 |
| D830044I16Rik | chr7:126971719-126976098 | 0.0797 | 0.3149  | 1.9825  | 0.241193 |
| Dpysl4        | chr7:139086000-139102704 | 0.0001 | 0.0249  | 7.9601  | 0.370931 |
| Sprn          | chr7:140150627-140154877 | 0.0317 | 0.1013  | 1.6745  | 0.367727 |
| Cd163l1       | chr7:140218266-140231145 | 0.0125 | 0.1342  | 3.4288  | 0.112315 |
| Olfr60        | chr7:140345051-140345987 | 0.1370 | 0.7213  | 2.3967  | 0.133051 |
| Gm15580       | chr7:143596438-143596994 | 0.0001 | 0.9885  | 13.2711 | 0.205941 |
| Mcemp1        | chr8:3665761-3668905     | 0.0190 | 0.4613  | 4.6044  | 0.094607 |
| 1700041G16Rik | chr8:22808274-22808732   | 0.0467 | 1.4707  | 4.9763  | 0.030473 |
| Asb5          | chr8:54550330-54587836   | 0.0812 | 0.2570  | 1.6614  | 0.396084 |
| Rasd2         | chr8:75213943-75224113   | 0.0001 | 0.0855  | 9.7404  | 0.180700 |
| 2210011C24Rik | chr8:84010229-84011442   | 0.1810 | 0.7436  | 2.0385  | 0.029872 |
| 9430002A10Rik | chr8:88174559-88175028   | 0.4099 | 0.7145  | 0.8019  | 0.548757 |
| Mt3           | chr8:94152606-94154148   | 0.0001 | 0.4251  | 12.0536 | 0.212221 |
| Ces2b         | chr8:104831571-104840093 | 0.0001 | 0.0696  | 9.4427  | 0.271892 |
| Gm27956       | chr8:105333887-105334119 | 0.6671 | 0.7592  | 0.1866  | 0.918815 |
| Rps18-ps3     | chr8:107262816-107263248 | 0.1757 | 0.9417  | 2.4225  | 0.063496 |
| Bcar1         | chr8:111710484-111743849 | 0.0001 | 0.1364  | 10.4136 | 0.048964 |
| 1700030J22Rik | chr8:116969598-116978943 | 0.0460 | 0.1803  | 1.9719  | 0.197518 |
| 6430548M08Rik | chr8:120114151-120165306 | 0.0289 | 0.0790  | 1.4511  | 0.218802 |
| Cdh15         | chr8:122848373-122867397 | 0.0384 | 0.3066  | 2.9962  | 0.047363 |
| Pard3         | chr8:127063892-127612286 | 0.0001 | 0.0325  | 8.3461  | 0.092506 |
| Mmp13         | chr9:7272513-7283333     | 0.0001 | 0.1250  | 10.2879 | 0.204100 |
| Mmp10         | chr9:7502351-7510238     | 0.0001 | 0.3843  | 11.9079 | 0.070771 |
| Muc16         | chr9:18495454-18512885   | 0.0001 | 0.5129  | 12.3243 | 0.180249 |
| Gm22060       | chr9:32446821-32446928   | 2.2366 | 2.0313  | -0.1389 | 0.925725 |
| Tecta         | chr9:42329618-42399929   | 0.0001 | 0.0245  | 7.9373  | 0.274620 |
| 4930550C14Rik | chr9:53405285-53432803   | 0.0001 | 0.2405  | 11.2316 | 0.120073 |
| Gm22304       | chr9:53639976-53640105   | 2.0492 | 4.6158  | 1.1715  | 0.313682 |
| Cib2          | chr9:54544793-54560218   | 0.0150 | 0.3297  | 4.4580  | 0.234421 |
| Igdcc4        | chr9:65101485-65137940   | 0.0001 | 0.0521  | 9.0264  | 0.208253 |
| Gm25313       | chr9:65196571-65196687   | 0.0001 | 11.8712 | 16.8571 | 0.192350 |
| Gm3436        | chr9:70852575-70853418   | 0.0001 | 1.0217  | 13.3187 | 0.006169 |
| 4930542C12Rik | chr9:78394955-78396158   | 0.1794 | 0.2767  | 0.6248  | 0.472938 |
| Ngp           | chr9:110419749-110423010 | 0.0001 | 1.1382  | 13.4745 | 0.181037 |
| Prss50        | chr9:110857966-110864628 | 0.1175 | 0.2906  | 1.3065  | 0.390145 |
| Dlec1         | chr9:119102477-119148246 | 0.0033 | 0.0651  | 4.3070  | 0.189811 |
| Ccdc120       | chrX:7731713-7750905     | 0.0001 | 0.0318  | 8.3140  | 0.436588 |
| Slc25a43      | chrX:36743658-36777202   | 0.1039 | 0.2818  | 1.4391  | 0.288602 |
| Xlr3a         | chrX:73086292-73097095   | 0.0001 | 0.0589  | 9.2021  | 0.436588 |
| Gm15379       | chrX:75458811-75459459   | 0.0660 | 0.3682  | 2.4800  | 0.208452 |

|               |                           |        |         |         |          |
|---------------|---------------------------|--------|---------|---------|----------|
| Awat2         | chrX:100402220-100442717  | 0.0403 | 0.1901  | 2.2387  | 0.163404 |
| Gm6285        | chrX:104947784-104948282  | 0.0992 | 0.7123  | 2.8437  | 0.082183 |
| Gm14857       | chrX:106281911-106285096  | 0.0068 | 0.0863  | 3.6648  | 0.212496 |
| Dach2         | chrX:113297509-113836386  | 0.0001 | 0.0429  | 8.7435  | 0.225791 |
| Mdm4-ps       | chrX:128261410-128267924  | 0.0034 | 0.1164  | 5.1070  | 0.018167 |
| Syt4          | chrX:133936384-133981812  | 0.0001 | 0.0745  | 9.5414  | 0.062265 |
| Mir3112       | chrX:134075315-134075397  | 0.0001 | 5.6168  | 15.7775 | 0.144471 |
| Bex2          | chrX:136066563-136068236  | 0.1183 | 0.2381  | 1.0084  | 0.570842 |
| Gm15009       | chrX:136802911-136803233  | 0.1327 | 1.1492  | 3.1142  | 0.231106 |
| Gm15267       | chrX:152043048-152043512  | 0.0001 | 0.3418  | 11.7390 | 0.436588 |
| Mageh1        | chrX:153036165-153037563  | 0.0612 | 0.4436  | 2.8579  | 0.108499 |
| Scml2         | chrX:161117192-161258213  | 0.0106 | 0.1150  | 3.4348  | 0.075057 |
| Gm6576        | chr15:27025385-27026207   | 0.3379 | 0.3698  | 0.1301  | 0.866096 |
| Ly6i          | chr15:74979811-74983430   | 0.0001 | 0.4779  | 12.2226 | 0.149674 |
| Tssk5         | chr15:76371957-76374938   | 0.0643 | 0.5270  | 3.0350  | 0.118223 |
| Gm22951       | chr15:99368028-99368135   | 0.9979 | 3.0908  | 1.6310  | 0.242255 |
| Gm9763        | chr15:99898286-99898556   | 0.0001 | 1.0729  | 13.3893 | 0.300382 |
| 5430421N21Rik | chr15:101485130-101491512 | 0.0349 | 0.4415  | 3.6611  | 0.114697 |
| 2610042L04Rik | chr14:4334762-4354687     | 0.0001 | 0.4740  | 12.2107 | 0.017278 |
| Gm8281        | chr14:5071039-5093318     | 0.0219 | 0.2918  | 3.7377  | 0.055066 |
| Gm3248        | chr14:5939224-5961745     | 0.0001 | 0.1940  | 10.9220 | 0.159384 |
| Gm3411        | chr14:6090976-6287250     | 0.0001 | 0.3862  | 11.9151 | 0.057227 |
| Plau          | chr14:20836661-20843388   | 0.0001 | 0.3208  | 11.6474 | 0.101733 |
| Gm26660       | chr14:25355800-25378635   | 0.0085 | 0.2422  | 4.8330  | 0.174867 |
| Gm24916       | chr14:31015147-31015226   | 1.8921 | 5.5588  | 1.5548  | 0.244642 |
| Sncg          | chr14:34370273-34374789   | 0.0001 | 0.1707  | 10.7372 | 0.436588 |
| Mmrn2         | chr14:34375503-34404287   | 0.0001 | 0.1219  | 10.2512 | 0.052234 |
| Samd4         | chr14:46882853-47105817   | 0.0001 | 0.0704  | 9.4600  | 0.002220 |
| Trav3-1       | chr14:52580706-52581213   | 0.4359 | 1.0612  | 1.2838  | 0.342354 |
| Trav13-4-dv7  | chr14:53757355-53757920   | 0.1669 | 2.2856  | 3.7754  | 0.004131 |
| Traj61        | chr14:54155004-54155076   | 0.0001 | 2.6540  | 14.6959 | 0.333356 |
| Traj59        | chr14:54156132-54156196   | 0.0001 | 3.0809  | 14.9111 | 0.244321 |
| Traj50        | chr14:54167589-54167652   | 3.5571 | 11.3871 | 1.6786  | 0.152467 |
| Nynrin        | chr14:55854035-55874735   | 0.0030 | 0.1161  | 5.2878  | 0.078158 |
| Gm26751       | chr14:55864310-55874735   | 0.0051 | 0.0630  | 3.6175  | 0.245580 |
| 3110083C13Rik | chr14:57999322-58003695   | 0.1498 | 0.4604  | 1.6201  | 0.232266 |
| Bmp1          | chr14:70474556-70520260   | 0.1779 | 0.0733  | -1.2796 | 0.074340 |
| Siah3         | chr14:75455981-75526141   | 0.2124 | 0.5557  | 1.3872  | 0.430402 |
| Pou4f1        | chr14:104462319-104467991 | 0.0001 | 0.0796  | 9.6364  | 0.114931 |
| Timm8a2       | chr14:122034673-122038420 | 0.0469 | 0.2027  | 2.1125  | 0.549414 |
| Ccdc154       | chr17:25162460-25171913   | 0.0244 | 0.2397  | 3.2954  | 0.273434 |
| Mir3547       | chr17:25245540-25245650   | 0.0001 | 6.0800  | 15.8918 | 0.022999 |
| Syngap1       | chr17:26941451-26970645   | 0.0001 | 0.1165  | 10.1856 | 0.057026 |
| Gm23442       | chr17:35162562-35162696   | 1.6266 | 5.7001  | 1.8091  | 0.198940 |
| H2-Q1         | chr17:35320404-35325099   | 0.0076 | 0.0867  | 3.5176  | 0.215079 |
| Gm20429       | chr17:37246960-37263064   | 0.0641 | 0.1641  | 1.3558  | 0.568087 |
| H2-M2         | chr17:37480850-37483552   | 0.0827 | 0.3609  | 2.1257  | 0.113433 |
| Prickle4      | chr17:47688516-47694736   | 0.0001 | 0.3811  | 11.8961 | 0.081268 |
| Gm16276       | chr17:56014282-56014544   | 0.4076 | 2.6901  | 2.7224  | 0.087510 |
| Sema6b        | chr17:56123084-56140343   | 0.0001 | 0.0696  | 9.4424  | 0.138590 |
| C3            | chr17:57203969-57228136   | 0.0292 | 0.1366  | 2.2274  | 0.029425 |
| Emr1          | chr17:57358685-57483529   | 0.0001 | 0.2852  | 11.4777 | 0.081707 |
| 4930583I09Rik | chr17:64832522-64836071   | 0.3461 | 0.8672  | 1.3254  | 0.392147 |
| Myom1         | chr17:71019520-71126856   | 0.0001 | 0.1326  | 10.3734 | 0.047662 |
| Gm17538       | chr17:77674375-77674702   | 0.0654 | 1.4865  | 4.5065  | 0.046588 |
| Abcg8         | chr17:84676301-84700333   | 0.0058 | 0.1283  | 4.4688  | 0.114899 |
| Myh11         | chr16:14194526-14291408   | 0.0001 | 0.0966  | 9.9161  | 0.012843 |
| Igic2         | chr16:19198400-19200351   | 0.0001 | 1.4417  | 13.8154 | 0.122493 |
| Snord66       | chr16:20684238-20684313   | 0.0001 | 6.9096  | 16.0763 | 0.085243 |
| Gm6467        | chr16:21896505-21897116   | 0.2651 | 0.8890  | 1.7455  | 0.078998 |
| Slc51a        | chr16:32475521-32487879   | 0.2377 | 0.2746  | 0.2079  | 0.829566 |
| Muc13         | chr16:33794036-33819934   | 0.0001 | 0.1980  | 10.9516 | 0.088905 |
| Eaf2          | chr16:36792883-36875003   | 0.0001 | 0.0969  | 9.9196  | 0.203111 |
| Maats1        | chr16:38297753-38342143   | 0.0001 | 0.2084  | 11.0253 | 0.292604 |
| Phldb2        | chr16:45746242-45953598   | 0.0086 | 0.0718  | 3.0683  | 0.152274 |
| D430001F17Rik | chr16:91931236-91962915   | 0.0805 | 0.2604  | 1.6927  | 0.226968 |
| C030010L15Rik | chr16:97994600-97997419   | 0.2689 | 1.1518  | 2.0989  | 0.081147 |
| Stau2         | chr1:16228673-16520112    | 0.0159 | 0.0966  | 2.6013  | 0.132396 |
| Vwa3b         | chr1:37026595-37076996    | 0.0222 | 0.1558  | 2.8108  | 0.217489 |
| Il1r1         | chr1:40225079-40316198    | 0.0297 | 0.1438  | 2.2769  | 0.298978 |
| Hecw2         | chr1:53806881-54195168    | 0.0117 | 0.0342  | 1.5546  | 0.117588 |

|               |                          |        |         |         |          |
|---------------|--------------------------|--------|---------|---------|----------|
| Speg          | chr1:75375296-75432320   | 0.0190 | 0.0259  | 0.4456  | 0.725147 |
| Fbxo36        | chr1:84839840-84900487   | 0.0399 | 0.2273  | 2.5113  | 0.120416 |
| Nmur1         | chr1:86386241-86388162   | 0.0809 | 0.3845  | 2.2493  | 0.140295 |
| Chrng         | chr1:87205810-87211835   | 0.0001 | 0.3574  | 11.8035 | 0.024010 |
| Ugt1a10       | chr1:88055387-88219004   | 0.0284 | 0.3905  | 3.7834  | 0.149163 |
| Ugt1a9        | chr1:88070799-88218997   | 0.0294 | 0.4042  | 3.7836  | 0.149163 |
| Ugt1a8        | chr1:88087812-88219004   | 0.0289 | 0.3975  | 3.7835  | 0.149163 |
| Ugt1a5        | chr1:88166011-88218997   | 0.0292 | 0.4018  | 3.7835  | 0.149163 |
| Ugt1a2        | chr1:88200600-88218997   | 0.0291 | 0.4077  | 3.8098  | 0.139927 |
| Ugt1a1        | chr1:88211958-88218997   | 0.0289 | 0.3980  | 3.7835  | 0.149163 |
| Gm26683       | chr1:91297202-91304405   | 0.0001 | 1.0673  | 13.3817 | 0.063142 |
| Ankmy1        | chr1:92870128-92902906   | 0.0461 | 0.2050  | 2.1511  | 0.049904 |
| Ano7          | chr1:93373895-93403502   | 0.0001 | 0.1007  | 9.9764  | 0.129630 |
| Tmem37        | chr1:120067376-120074074 | 0.0001 | 0.1505  | 10.5555 | 0.244321 |
| Chil1         | chr1:134182175-134190181 | 0.0382 | 0.1524  | 1.9975  | 0.354347 |
| NA            | chr1:150264924-150266056 | 0.0001 | 0.2497  | 11.2860 | 0.237588 |
| Rgs8          | chr1:153653024-153697667 | 0.0079 | 0.1321  | 4.0632  | 0.014388 |
| Mir1927       | chr1:160295863-160295972 | 1.5673 | 2.5643  | 0.7103  | 0.697519 |
| Fcgr3         | chr1:171051173-171064935 | 0.0370 | 0.4624  | 3.6437  | 0.104896 |
| Pvrl4         | chr1:171370098-171388598 | 0.0343 | 0.2340  | 2.7704  | 0.118546 |
| Kcnj9         | chr1:172321032-172329263 | 0.0001 | 0.0528  | 9.0446  | 0.389106 |
| Kcnj10        | chr1:172341209-172374085 | 0.0159 | 0.1666  | 3.3899  | 0.044202 |
| Mir29b-2      | chr1:195037039-195037120 | 0.0001 | 10.1410 | 16.6298 | 0.066027 |
| Peli3         | chr19:4930650-4943127    | 0.0505 | 0.1668  | 1.7242  | 0.211132 |
| Cst6          | chr19:5344704-5349574    | 0.0001 | 0.0928  | 9.8587  | 0.067283 |
| Gm14963       | chr19:6268794-6276605    | 0.0335 | 0.1412  | 2.0759  | 0.206428 |
| Nrxn2         | chr19:6418730-6544169    | 0.0060 | 0.0144  | 1.2564  | 0.513837 |
| Dagla         | chr19:10245264-10304877  | 0.0001 | 0.0288  | 8.1674  | 0.316607 |
| Glis3         | chr19:28258850-28680077  | 0.0001 | 0.0777  | 9.6014  | 0.030296 |
| Prkg1         | chr19:30567550-31765033  | 0.0001 | 0.0208  | 7.7019  | 0.376461 |
| Gm16068       | chr19:47606143-47617106  | 0.3814 | 1.3611  | 1.8354  | 0.196869 |
| 9430020K01Rik | chr18:4634928-4682868    | 0.0001 | 0.1104  | 10.1087 | 0.092583 |
| Gm10269       | chr18:20682591-20682963  | 0.6257 | 0.9328  | 0.5761  | 0.463901 |
| E230025N22Rik | chr18:36684922-36695925  | 0.0531 | 0.1287  | 1.2779  | 0.481730 |
| NA            | chr18:38467866-38467933  | 0.4182 | 4.7026  | 3.4913  | 0.254199 |
| Dpysl3        | chr18:43320978-43438286  | 0.0001 | 0.0416  | 8.7015  | 0.322726 |
| Cd63-ps       | chr18:50134725-50135600  | 0.3291 | 0.4620  | 0.4891  | 0.679464 |
| Gm15345       | chr18:56769716-56801688  | 0.0001 | 0.9529  | 13.2182 | 0.126981 |
| Slc27a6       | chr18:58556256-58612773  | 0.0774 | 0.2551  | 1.7198  | 0.251813 |
| Gm22005       | chr2:3291377-3291518     | 0.0001 | 5.2867  | 15.6901 | 0.311726 |
| Gm26073       | chr2:10473350-10473477   | 0.0001 | 1.2486  | 13.6080 | 0.436588 |
| Mrc1          | chr2:14229413-14332057   | 0.0001 | 0.0432  | 8.7538  | 0.224012 |
| Npdc1         | chr2:25399350-25409494   | 0.0001 | 0.1600  | 10.6436 | 0.050928 |
| Tmem141       | chr2:25620066-25622005   | 0.0001 | 0.7736  | 12.9173 | 0.199279 |
| Lcn10         | chr2:25682725-25686081   | 0.1352 | 0.3029  | 1.1634  | 0.503736 |
| NA            | chr2:26912847-26912915   | 1.5702 | 5.3507  | 1.7688  | 0.409769 |
| Barhl1        | chr2:28907678-28916668   | 0.0329 | 0.0819  | 1.3160  | 0.380175 |
| 9330198N18Rik | chr2:30629654-30689210   | 0.0001 | 0.3479  | 11.7643 | 0.172652 |
| Gm22516       | chr2:31189690-31189814   | 0.2198 | 2.7934  | 3.6677  | 0.031415 |
| NA            | chr2:32712899-32712972   | 2.3213 | 5.4076  | 1.2201  | 0.325588 |
| Gm13523       | chr2:32873754-32876001   | 0.0001 | 0.8784  | 13.1006 | 0.143228 |
| Garnl3        | chr2:32986365-33131654   | 0.0001 | 0.0380  | 8.5717  | 0.074992 |
| Ttll11        | chr2:35751240-35979913   | 0.0422 | 0.1991  | 2.2382  | 0.035681 |
| Gm13588       | chr2:38490103-38490238   | 0.5239 | 3.6567  | 2.8031  | 0.198319 |
| Gm13511       | chr2:39216931-39217294   | 0.0001 | 0.5881  | 12.5218 | 0.224012 |
| Kynu          | chr2:43555328-43682715   | 0.0001 | 0.0585  | 9.1921  | 0.343617 |
| Gm13517       | chr2:55775547-55777042   | 0.1144 | 0.3977  | 1.7982  | 0.245528 |
| Gm13559       | chr2:58740638-58741501   | 0.2707 | 0.7908  | 1.5467  | 0.327980 |
| Gca           | chr2:62664284-62694109   | 0.0001 | 0.1614  | 10.6562 | 0.059675 |
| Scn2a1        | chr2:65620856-65767447   | 0.0001 | 0.0730  | 9.5122  | 0.063801 |
| Bbs5          | chr2:69647170-69667571   | 0.0001 | 0.1103  | 10.1067 | 0.230771 |
| Gm13641       | chr2:71319782-71320255   | 0.7007 | 0.6201  | -0.1762 | 0.865325 |
| Gm13651       | chr2:77291330-77292440   | 0.0001 | 0.2333  | 11.1881 | 0.240340 |
| Gm13673       | chr2:79359864-79360395   | 0.0001 | 0.2489  | 11.2816 | 0.436588 |
| Spi1          | chr2:91082389-91115756   | 0.1338 | 0.2094  | 0.6463  | 0.424164 |
| Pacsin3       | chr2:91255953-91264679   | 0.0396 | 0.1026  | 1.3741  | 0.411394 |
| Nutm1         | chr2:112247947-112259291 | 0.0001 | 0.0660  | 9.3668  | 0.205216 |
| Gm13940       | chr2:112389196-112389497 | 0.1420 | 2.5364  | 4.1590  | 0.042001 |
| Gm14088       | chr2:119008208-119008477 | 0.0001 | 2.0671  | 14.3353 | 0.044698 |
| Epb4.2        | chr2:121017890-121037072 | 0.0353 | 0.1461  | 2.0492  | 0.063128 |
| Trim69        | chr2:122160699-122179027 | 0.0680 | 0.3855  | 2.5038  | 0.073509 |

|               |                          |        |        |         |          |
|---------------|--------------------------|--------|--------|---------|----------|
| Gatm          | chr2:122594466-122611303 | 0.0001 | 0.4048 | 11.9832 | 0.174116 |
| Il1a          | chr2:129299609-129309972 | 0.0553 | 0.2560 | 2.2104  | 0.156059 |
| Cpxm1         | chr2:130390774-130397574 | 0.0001 | 0.2645 | 11.3692 | 0.084478 |
| Ninl          | chr2:150934518-151039382 | 0.0180 | 0.1043 | 2.5322  | 0.021215 |
| Gm14165       | chr2:152353614-152354566 | 0.3368 | 0.5597 | 0.7329  | 0.246826 |
| Hck           | chr2:153108467-153151441 | 0.0001 | 0.3176 | 11.6329 | 0.001271 |
| Actl10        | chr2:154551775-154553276 | 0.1281 | 0.2935 | 1.1959  | 0.491291 |
| Tldc2         | chr2:157087054-157096482 | 0.1276 | 0.6578 | 2.3660  | 0.139779 |
| Z410019O14Rik | chr2:157595582-157597320 | 0.1359 | 0.4908 | 1.8528  | 0.470797 |
| Arhgap40      | chr2:158512795-158550762 | 0.0291 | 0.1673 | 2.5219  | 0.418434 |
| Gm14302       | chr2:164459895-164460955 | 0.0001 | 2.5458 | 14.6358 | 0.206057 |
| Wfdc2         | chr2:164562412-164568510 | 0.0001 | 0.4391 | 12.1003 | 0.300117 |
| Gm14274       | chr2:172100620-172101235 | 0.0899 | 0.7661 | 3.0904  | 0.061446 |
| C330013J21Rik | chr2:177903339-177925613 | 0.0001 | 0.7271 | 12.8280 | 0.227975 |
| BC051628      | chr2:181220012-181222854 | 0.1304 | 0.4349 | 1.7380  | 0.143673 |
| Pld1          | chr3:27938694-28133362   | 0.0133 | 0.0204 | 0.6192  | 0.720045 |
| Gm7741        | chr3:35863876-35864865   | 0.0217 | 0.3869 | 4.1568  | 0.084828 |
| Nbea          | chr3:55625204-56183701   | 0.0020 | 0.0533 | 4.7035  | 0.001084 |
| Mir16-2       | chr3:69009901-69009996   | 0.6744 | 9.4129 | 3.8030  | 0.067361 |
| Rab25         | chr3:88542028-88548300   | 0.0001 | 0.1593 | 10.6372 | 0.255969 |
| Gm24608       | chr3:90010594-90010730   | 0.6281 | 2.8141 | 2.1635  | 0.149924 |
| S100a8        | chr3:90669070-90670034   | 0.1635 | 8.9181 | 5.7692  | 0.246954 |
| Gnat2         | chr3:108092788-108101432 | 0.0001 | 0.2225 | 11.1194 | 0.058979 |
| Gpr61         | chr3:108148320-108154882 | 0.1566 | 0.1422 | -0.1388 | 0.865773 |
| Gm12517       | chr3:108602390-108602815 | 0.5302 | 1.6263 | 1.6169  | 0.016323 |
| Bcar3         | chr3:122419779-122530180 | 0.0001 | 0.0602 | 9.2335  | 0.436588 |
| Cyp2u1        | chr3:131290490-131303227 | 0.0001 | 0.3698 | 11.8526 | 0.068780 |
| Gm15540       | chr3:142743660-142744681 | 0.2852 | 0.9638 | 1.7566  | 0.197505 |
| Rpsa-ps10     | chr3:150072589-150073620 | 0.0809 | 0.4273 | 2.4019  | 0.161350 |
| NA            | chr3:154664095-154757527 | 0.0230 | 0.1941 | 3.0750  | 0.126210 |
| Lrriq3        | chr3:155093433-155194278 | 0.0001 | 0.0883 | 9.7865  | 0.309853 |
| A1838599      | chr4:3242054-3258092     | 0.0001 | 0.1148 | 10.1651 | 0.001292 |
| Cdh17         | chr4:11758146-11817895   | 0.0001 | 0.1156 | 10.1743 | 0.022930 |
| Gm12367       | chr4:35225896-35262222   | 0.0001 | 0.0717 | 9.4862  | 0.274620 |
| Spag8         | chr4:43651334-43653594   | 0.0772 | 0.2859 | 1.8890  | 0.115805 |
| Pax5          | chr4:44531144-44711446   | 0.0001 | 0.1555 | 10.6031 | 0.264328 |
| Gm12470       | chr4:53662295-53663344   | 0.0001 | 0.4530 | 12.1453 | 0.165941 |
| Rps15a-ps8    | chr4:53791069-53791456   | 0.2912 | 1.0857 | 1.8986  | 0.073062 |
| Gm12516       | chr4:55392316-55392701   | 0.2219 | 1.5346 | 2.7896  | 0.243467 |
| Gm12538       | chr4:57413710-57414196   | 0.2637 | 1.4084 | 2.4170  | 0.099167 |
| Gm11209       | chr4:62627676-62633712   | 0.3251 | 0.4670 | 0.5228  | 0.811450 |
| Gm11212       | chr4:63350410-63353846   | 0.0001 | 0.6851 | 12.7421 | 0.032883 |
| Tnfsf15       | chr4:63727083-63745113   | 0.0001 | 0.2227 | 11.1207 | 0.083487 |
| Gm11249       | chr4:67930880-67931739   | 0.1990 | 0.5300 | 1.4134  | 0.379125 |
| Gm11246       | chr4:76927310-76927655   | 0.3096 | 0.8969 | 1.5347  | 0.278987 |
| Gm12419       | chr4:84923553-84924189   | 0.0001 | 0.6789 | 12.7290 | 0.069898 |
| Gm12798       | chr4:101403080-101407856 | 0.0001 | 0.5415 | 12.4028 | 0.203369 |
| Ermap         | chr4:119175456-119190011 | 0.0054 | 0.0312 | 2.5330  | 0.403731 |
| Gm12959       | chr4:119553655-119554058 | 0.6414 | 0.6699 | 0.0626  | 0.958344 |
| Gm23548       | chr4:123490230-123490336 | 0.6044 | 5.4078 | 3.1614  | 0.256509 |
| Oscp1         | chr4:126058564-126092195 | 0.0001 | 0.0567 | 9.1471  | 0.337690 |
| Dlgap3        | chr4:127169203-127237022 | 0.0125 | 0.0951 | 2.9280  | 0.283485 |
| Gm12967       | chr4:129761627-129761916 | 0.2652 | 1.1540 | 2.1216  | 0.230080 |
| Tmem200b      | chr4:131921770-131923140 | 0.0001 | 0.3223 | 11.6540 | 0.127457 |
| Gm13033       | chr4:132884544-132886626 | 0.0463 | 0.2752 | 2.5729  | 0.238796 |
| Slc30a2       | chr4:134343180-134354484 | 0.0080 | 0.0977 | 3.6182  | 0.197144 |
| 1700095J12Rik | chr4:138137594-138138518 | 0.5260 | 0.7938 | 0.5938  | 0.612292 |
| Nbl1          | chr4:139082283-139092993 | 0.1149 | 0.2786 | 1.2775  | 0.541366 |
| Gm13039       | chr4:143166602-143167396 | 0.1504 | 0.7551 | 2.3281  | 0.059542 |
| Gm13248       | chr4:146610960-146658160 | 0.0168 | 0.6776 | 5.3298  | 0.143447 |
| Gm13156       | chr4:147893672-147893993 | 0.1997 | 0.6777 | 1.7631  | 0.509159 |
| Arhgef16      | chr4:154278485-154301676 | 0.0001 | 0.0409 | 8.6758  | 0.263291 |
| Gm25515       | chr10:4104312-4104469    | 0.0001 | 1.0541 | 13.3637 | 0.436588 |
| B230208H11Rik | chr10:12916647-12923100  | 0.1644 | 0.4591 | 1.4819  | 0.428234 |
| Il22ra2       | chr10:19621997-19634681  | 0.0001 | 0.0663 | 9.3738  | 0.436588 |
| Gm6846        | chr10:21830498-21844851  | 0.0001 | 0.0835 | 9.7062  | 0.436588 |
| Wispr3        | chr10:39150970-39163794  | 0.0001 | 0.3170 | 11.6304 | 0.281069 |
| G630090E17Rik | chr10:39946906-39960153  | 0.0718 | 0.0927 | 0.3687  | 0.873644 |
| Gm16546       | chr10:43319359-43319714  | 0.0001 | 0.9977 | 13.2844 | 0.079542 |
| Gm10322       | chr10:59616062-59616398  | 0.3814 | 0.6754 | 0.8244  | 0.625620 |
| Nodal         | chr10:61417971-61425338  | 0.0363 | 0.4029 | 3.4723  | 0.128870 |

|               |                           |        |        |         |          |
|---------------|---------------------------|--------|--------|---------|----------|
| Npffr1        | chr10:61595483-61626385   | 0.0164 | 0.1056 | 2.6836  | 0.509413 |
| Gm26359       | chr10:67235860-67235961   | 0.0001 | 8.6887 | 16.4068 | 0.109897 |
| n-R5s77       | chr10:78314164-78314283   | 0.0001 | 3.3388 | 15.0271 | 0.257064 |
| Spic          | chr10:88674771-88685015   | 0.0001 | 0.1038 | 10.0201 | 0.312649 |
| Gm15963       | chr10:93726725-93728207   | 0.0001 | 0.2362 | 11.2059 | 0.436588 |
| Ppfa2         | chr10:106470309-106933467 | 0.0001 | 0.0259 | 8.0161  | 0.436588 |
| Gm25709       | chr10:117662281-117662388 | 0.0001 | 2.6007 | 14.6666 | 0.402194 |
| Gm24330       | chr10:121618467-121618543 | 2.2478 | 3.4936 | 0.6362  | 0.702232 |
| D930020B18Rik | chr10:121641587-121692892 | 0.0001 | 0.1691 | 10.7239 | 0.079246 |
| Gm9081        | chr10:122169372-122170363 | 0.0216 | 0.2803 | 3.6948  | 0.406774 |
| Mettl21b      | chr10:127031181-127041513 | 0.0001 | 0.1052 | 10.0383 | 0.363346 |
| Rdh16         | chr10:127801151-127846565 | 0.0001 | 0.0312 | 8.2832  | 0.436588 |
| Gm25361       | chr10:128402757-128402833 | 0.0001 | 3.2531 | 14.9895 | 0.190361 |
| Abca13        | chr11:9191941-9684259     | 0.0001 | 0.0085 | 6.4067  | 0.436588 |
| Grb10         | chr11:11930507-12038683   | 0.0001 | 0.0379 | 8.5661  | 0.390994 |
| Meis1         | chr11:18880429-19018958   | 0.0024 | 0.0286 | 3.6038  | 0.198554 |
| Gm12108       | chr11:32095260-32101228   | 0.0331 | 0.1130 | 1.7723  | 0.255609 |
| BC053393      | chr11:46571535-46589232   | 0.0001 | 0.1162 | 10.1818 | 0.436588 |
| BC049762      | chr11:51253650-51263046   | 0.1458 | 0.2704 | 0.8913  | 0.539032 |
| NA            | chr11:52104078-52104149   | 0.0001 | 9.4467 | 16.5275 | 0.208599 |
| Il13          | chr11:53631323-53634702   | 0.0001 | 0.2147 | 11.0678 | 0.255315 |
| Gm12223       | chr11:54247599-54254495   | 0.3641 | 0.4785 | 0.3942  | 0.837572 |
| Slc36a2       | chr11:55158469-55185077   | 0.0526 | 0.0719 | 0.4523  | 0.838423 |
| Serpinf2      | chr11:75431731-75439591   | 0.0552 | 0.1127 | 1.0285  | 0.569706 |
| Gm12571       | chr11:78149195-78149438   | 1.5364 | 2.0862 | 0.4414  | 0.700701 |
| Snord7        | chr11:83294303-83294400   | 2.6873 | 7.6352 | 1.5065  | 0.400520 |
| Hsf5          | chr11:87617163-87659542   | 0.0001 | 0.1215 | 10.2469 | 0.018569 |
| 4930556N13Rik | chr11:88851603-88881395   | 0.1653 | 0.1468 | -0.1713 | 0.936758 |
| Gm20644       | chr11:98285381-98287444   | 0.0001 | 0.0803 | 9.6494  | 0.436588 |
| Gm25106       | chr11:98473674-98473808   | 0.0001 | 2.6315 | 14.6836 | 0.182178 |
| Leprel4       | chr11:100408455-100414836 | 0.0197 | 0.0945 | 2.2622  | 0.466603 |
| Plcd3         | chr11:103070303-103101658 | 0.0084 | 0.2079 | 4.6371  | 0.078239 |
| NA            | chr11:106552029-106552116 | 0.0001 | 3.0684 | 14.9052 | 0.363346 |
| NA            | chr11:113671203-113671280 | 0.0001 | 5.2898 | 15.6909 | 0.364625 |
| Gprc5c        | chr11:114851151-114872617 | 0.0001 | 0.1129 | 10.1414 | 0.211444 |
| Cd300ld       | chr11:114982273-114989922 | 0.0104 | 0.2615 | 4.6523  | 0.085553 |
| Recql5os1     | chr11:115925026-115926143 | 0.0001 | 1.4311 | 13.8049 | 0.055393 |
| Gm11730       | chr11:117094947-117097067 | 0.0001 | 0.5457 | 12.4140 | 0.247054 |
| Klhl29        | chr12:5077471-5375682     | 0.0001 | 0.1132 | 10.1443 | 0.022541 |
| Lamb1         | chr12:31265233-31329644   | 0.0001 | 0.0296 | 8.2106  | 0.270044 |
| Agr3          | chr12:35925619-35949736   | 0.1319 | 0.7849 | 2.5729  | 0.482915 |
| Agmo          | chr12:37241640-37582202   | 0.0001 | 0.0938 | 9.8738  | 0.370410 |
| Rpl31-ps17    | chr12:54701328-54701706   | 0.7251 | 1.1081 | 0.6118  | 0.436531 |
| Gm23910       | chr12:73145773-73145905   | 0.0001 | 2.2809 | 14.4773 | 0.330051 |
| Rhoj          | chr12:75308321-75401456   | 0.0001 | 0.0254 | 7.9911  | 0.339152 |
| Gm7862        | chr12:76152335-76152627   | 0.2195 | 1.0331 | 2.2349  | 0.467730 |
| Gm26477       | chr12:90981224-90981547   | 0.6273 | 1.0481 | 0.7406  | 0.281370 |
| Mir345        | chr12:108836972-108837068 | 0.0001 | 2.0111 | 14.2957 | 0.436588 |
| Tnfaip2       | chr12:111442468-111455018 | 0.0384 | 0.0940 | 1.2930  | 0.378138 |
| Ighv1-54      | chr12:115193674-115194108 | 0.0001 | 1.3036 | 13.6702 | 0.415873 |
| Gm23084       | chr13:3648536-3648650     | 0.9366 | 1.8261 | 0.9632  | 0.636459 |
| Gm25444       | chr13:14628618-14628731   | 0.7560 | 2.7249 | 1.8498  | 0.332453 |
| Gm11362       | chr13:28836858-28837724   | 0.1548 | 0.3548 | 1.1960  | 0.637820 |
| Gm11380       | chr13:31884224-31885224   | 0.0001 | 0.3545 | 11.7915 | 0.058493 |
| Serpnb9b      | chr13:33027415-33041884   | 0.0001 | 0.1410 | 10.4612 | 0.335611 |
| Serpnb1b      | chr13:33084124-33094380   | 0.0001 | 0.1139 | 10.1539 | 0.436588 |
| Tifab         | chr13:56173702-56178885   | 0.0313 | 0.1058 | 1.7591  | 0.350714 |
| Spata31d1b    | chr13:59712283-59719289   | 0.0001 | 0.0323 | 8.3359  | 0.436588 |
| Gm6478        | chr13:62035419-62036163   | 0.0001 | 0.5916 | 12.5305 | 0.401224 |
| Gm16133       | chr13:63333136-63339959   | 0.0001 | 0.1874 | 10.8716 | 0.436588 |
| Gm10037       | chr13:67833234-67843113   | 0.0001 | 0.8318 | 13.0221 | 0.436588 |
| Spata9        | chr13:75967738-75998968   | 0.0260 | 0.2753 | 3.4057  | 0.325129 |
| Tmbim7        | chr5:3657003-3680325      | 0.0001 | 0.1159 | 10.1791 | 0.255315 |
| Cd36          | chr5:17781689-17888959    | 0.0001 | 0.0760 | 9.5697  | 0.203233 |
| 1500035N22Rik | chr5:24985841-24998168    | 0.0001 | 0.4512 | 12.1394 | 0.024366 |
| Gm24436       | chr5:31870045-31870347    | 0.0001 | 2.7568 | 14.7507 | 0.240945 |
| Gm15614       | chr5:32507183-32651065    | 0.0001 | 0.3327 | 11.7000 | 0.041524 |
| Psap11        | chr5:36204020-36206568    | 0.0001 | 0.1999 | 10.9653 | 0.179457 |
| Gm26647       | chr5:37038163-37041646    | 0.0001 | 0.1530 | 10.5794 | 0.353491 |
| Gm15823       | chr5:64252577-64253206    | 0.0001 | 0.5849 | 12.5140 | 0.300689 |
| Apbb2         | chr5:66298860-66618828    | 0.0041 | 0.0998 | 4.5892  | 0.216319 |

|               |                          |        |        |         |          |
|---------------|--------------------------|--------|--------|---------|----------|
| Enam          | chr5:88487981-88506049   | 0.0001 | 0.0402 | 8.6523  | 0.401224 |
| 4930524J08Rik | chr5:99979060-99979663   | 0.0709 | 1.2509 | 4.1406  | 0.192663 |
| Gm26808       | chr5:109922648-109923481 | 0.0521 | 0.7047 | 3.7589  | 0.469730 |
| Ywhaq-ps2     | chr5:114828572-114829215 | 0.0333 | 0.3003 | 3.1726  | 0.487362 |
| Gm13829       | chr5:115291762-115291900 | 0.0001 | 4.0588 | 15.3088 | 0.118560 |
| Pla2g1b       | chr5:115466261-115474722 | 0.0001 | 0.3095 | 11.5959 | 0.436588 |
| Rps16-ps2     | chr5:129128019-129128571 | 0.1548 | 1.0499 | 2.7615  | 0.354572 |
| NA            | chr5:134201865-134202151 | 0.0001 | 1.0072 | 13.2980 | 0.198276 |
| Gm26340       | chr5:134448573-134448672 | 0.0001 | 2.9019 | 14.8247 | 0.324871 |
| Gm25492       | chr5:135053987-135054116 | 1.4898 | 5.6072 | 1.9121  | 0.513675 |
| Mlxipl        | chr5:135106890-135138382 | 0.0001 | 0.0561 | 9.1315  | 0.303157 |
| Mir106b       | chr5:138165736-138165818 | 0.0001 | 7.7174 | 16.2358 | 0.097186 |
| Nxpe5         | chr5:138225897-138253363 | 0.0001 | 0.1557 | 10.6047 | 0.153492 |
| Gm24311       | chr5:144013997-144014101 | 1.8479 | 2.8796 | 0.6399  | 0.741272 |
| Gm23995       | chr5:144774424-144774553 | 0.0001 | 2.4702 | 14.5923 | 0.198269 |
| Gm26774       | chr6:6952169-6955900     | 0.0001 | 0.0862 | 9.7524  | 0.436588 |
| Gm16043       | chr6:8420008-8443455     | 0.2427 | 0.3545 | 0.5465  | 0.769925 |
| Wnt16         | chr6:22288226-22298522   | 0.0648 | 0.1523 | 1.2329  | 0.340960 |
| Fscn3         | chr6:28427788-28438622   | 0.0206 | 0.3221 | 3.9665  | 0.166112 |
| Lrguk         | chr6:34029447-34134034   | 0.0001 | 0.1839 | 10.8446 | 0.318658 |
| Gm13859       | chr6:34373690-34380789   | 0.0601 | 0.2803 | 2.2211  | 0.505458 |
| Cald1         | chr6:34598499-34775473   | 0.0029 | 0.0528 | 4.1970  | 0.329093 |
| Gm25283       | chr6:47637142-47637219   | 0.0001 | 3.0445 | 14.8939 | 0.436588 |
| Gm20445       | chr6:65882778-65883343   | 0.0001 | 0.3837 | 11.9057 | 0.258573 |
| Gm23346       | chr6:70855443-70855579   | 0.0001 | 2.8349 | 14.7910 | 0.416622 |
| Gm1070        | chr6:71293764-71302718   | 0.0001 | 0.2283 | 11.1566 | 0.171130 |
| Vax2          | chr6:83711263-83738304   | 0.0001 | 0.2274 | 11.1513 | 0.148914 |
| Cyp26b1       | chr6:84571413-84593908   | 0.0001 | 0.0563 | 9.1360  | 0.263173 |
| Gm7507        | chr6:84812239-84813247   | 0.0001 | 0.4764 | 12.2181 | 0.051785 |
| Nat8b         | chr6:85932680-85933379   | 0.0001 | 0.6271 | 12.6145 | 0.131295 |
| Gm10443       | chr6:86334006-86334316   | 0.3445 | 1.2695 | 1.8817  | 0.384929 |
| Gm25178       | chr6:88405976-88406301   | 0.0001 | 1.5799 | 13.9476 | 0.022119 |
| Gm15756       | chr6:90596684-90599948   | 0.0001 | 0.4045 | 11.9819 | 0.436588 |
| Fbln2         | chr6:91212454-91272540   | 0.0144 | 0.0561 | 1.9613  | 0.396153 |
| Tmem40        | chr6:115729130-115762466 | 0.0001 | 0.0629 | 9.2968  | 0.436588 |
| Cacna1c       | chr6:118592318-118780324 | 0.0001 | 0.0341 | 8.4123  | 0.213163 |
| Gm4651        | chr6:121064463-121069954 | 0.0001 | 0.1918 | 10.9051 | 0.306099 |
| Mfap5         | chr6:122505844-122529290 | 0.0001 | 0.0539 | 9.0739  | 0.436588 |
| Clec4a3       | chr6:122952514-122969875 | 0.0001 | 0.4348 | 12.0862 | 0.381995 |
| C1ra          | chr6:124512631-124523440 | 0.0001 | 0.1451 | 10.5029 | 0.282449 |
| Gm8778        | chr6:128976865-128977972 | 0.0001 | 0.1247 | 10.2839 | 0.436588 |
| Eps8          | chr6:137477244-137654876 | 0.0001 | 0.0961 | 9.9091  | 0.203918 |
| Rpl38-ps2     | chr6:140746918-140747216 | 0.1434 | 0.6543 | 2.1898  | 0.455626 |
| Gm15784       | chr6:149361685-149363147 | 0.0147 | 0.2836 | 4.2693  | 0.375696 |
| Prkcg         | chr7:3303531-3331094     | 0.0275 | 0.1157 | 2.0709  | 0.054934 |
| Ceacam16      | chr7:19852096-19861299   | 0.0001 | 0.3733 | 11.8660 | 0.198725 |
| Irgc1         | chr7:24431921-24435534   | 0.0162 | 0.1950 | 3.5874  | 0.137749 |
| NA            | chr7:26071809-26072976   | 0.1099 | 0.3393 | 1.6266  | 0.484868 |
| Gm15570       | chr7:27271767-27272392   | 0.0001 | 0.3752 | 11.8733 | 0.436588 |
| Mir1964       | chr7:29773293-29773376   | 0.0001 | 3.6591 | 15.1592 | 0.144629 |
| Zfp30         | chr7:29783997-29794702   | 0.0036 | 0.0318 | 3.1362  | 0.448503 |
| Gm10169       | chr7:29965099-29965640   | 0.2601 | 1.3711 | 2.3981  | 0.117668 |
| Tshz3         | chr7:36698117-36773545   | 0.0079 | 0.0454 | 2.5172  | 0.459078 |
| Gm6871        | chr7:41545673-41573662   | 0.0001 | 0.1034 | 10.0146 | 0.387179 |
| Klk1b26       | chr7:44012677-44016965   | 0.0001 | 0.3456 | 11.7550 | 0.357399 |
| Tph1          | chr7:46647129-46672537   | 0.0001 | 0.0522 | 9.0284  | 0.353491 |
| Rpl17-ps10    | chr7:72648756-72649311   | 0.3570 | 1.3051 | 1.8702  | 0.209699 |
| Gm24224       | chr7:79352487-79352745   | 0.0001 | 2.0211 | 14.3028 | 0.008753 |
| Homer2        | chr7:81600480-81706925   | 0.0001 | 0.0643 | 9.3287  | 0.298308 |
| Adamts13      | chr7:82335693-82614450   | 0.0036 | 0.0896 | 4.6288  | 0.176651 |
| Gm25790       | chr7:84323308-84323415   | 0.0001 | 1.2888 | 13.6538 | 0.436588 |
| Ucp3          | chr7:100472989-100486432 | 0.0001 | 0.1627 | 10.6677 | 0.083621 |
| Gm3200        | chr7:100760804-100761806 | 0.1831 | 0.3655 | 0.9970  | 0.597046 |
| Gm22504       | chr7:105642337-105642476 | 0.4610 | 5.5607 | 3.5926  | 0.040543 |
| Gm26599       | chr7:108950753-108961535 | 0.0068 | 0.2295 | 5.0775  | 0.324601 |
| Ric3          | chr7:109034311-109083331 | 0.0001 | 0.1017 | 9.9903  | 0.227505 |
| Gm25683       | chr7:118153479-118153610 | 0.4891 | 6.0030 | 3.6175  | 0.167981 |
| Gm24596       | chr7:126563873-126563980 | 0.0001 | 4.3927 | 15.4228 | 0.043148 |
| Gm17511       | chr7:127286040-127286385 | 0.1239 | 1.8358 | 3.8894  | 0.373883 |
| Syce1         | chr7:140777228-140787854 | 0.0001 | 1.1914 | 13.5403 | 0.300659 |
| Scgb1c1       | chr7:140845564-140846768 | 0.0001 | 0.4745 | 12.2122 | 0.436588 |



|               |                          |        |        |         |          |
|---------------|--------------------------|--------|--------|---------|----------|
| Eps8l2        | chr7:141338879-141363020 | 0.0001 | 0.0552 | 9.1079  | 0.222199 |
| B230206H07Rik | chr7:141359140-141365110 | 0.0001 | 0.0442 | 8.7868  | 0.436588 |
| Gm10575       | chr7:141461480-141467771 | 0.0001 | 0.2962 | 11.5323 | 0.021402 |
| Gm23184       | chr8:25610427-25610558   | 0.0001 | 4.9057 | 15.5822 | 0.251589 |
| Gm2193        | chr8:41608667-41609669   | 0.0214 | 0.1377 | 2.6854  | 0.509413 |
| Hpgd          | chr8:56294551-56321046   | 0.0001 | 0.3255 | 11.6684 | 0.173343 |
| Cilp2         | chr8:69880368-69887687   | 0.0001 | 0.1134 | 10.1467 | 0.117517 |
| Frem3         | chr8:80611079-80695356   | 0.0001 | 0.0903 | 9.8187  | 0.153864 |
| Lpcat2        | chr8:92855349-92919279   | 0.0333 | 0.1750 | 2.3950  | 0.096089 |
| Slc12a3       | chr8:94329191-94366213   | 0.0453 | 0.0959 | 1.0819  | 0.537776 |
| A330008L17Rik | chr8:99416641-99733438   | 0.0001 | 0.0453 | 8.8225  | 0.122994 |
| Gm22063       | chr8:105172495-105172602 | 0.0001 | 3.4136 | 15.0590 | 0.129775 |
| Tsnaxip1      | chr8:105827743-105844676 | 0.0194 | 0.1480 | 2.9299  | 0.331661 |
| Gm23193       | chr8:111194963-111195045 | 0.2605 | 5.8899 | 4.4989  | 0.266256 |
| Gm6793        | chr8:112013432-112015036 | 0.0001 | 0.4465 | 12.1245 | 0.015143 |
| Cdh13         | chr8:118283732-119324921 | 0.0116 | 0.0442 | 1.9308  | 0.169183 |
| Gria4         | chr9:4417898-4796234     | 0.0001 | 0.0427 | 8.7391  | 0.436588 |
| Gm20519       | chr9:21533626-21533985   | 0.8021 | 0.7635 | -0.0711 | 0.967804 |
| Gm10701       | chr9:24341656-24418709   | 0.0001 | 0.4091 | 11.9984 | 0.372545 |
| Tmprss4       | chr9:45172725-45204092   | 0.0001 | 0.3229 | 11.6569 | 0.108188 |
| 4930448E22Rik | chr9:46326390-46329413   | 0.0001 | 0.1133 | 10.1465 | 0.436588 |
| Ttc12         | chr9:49436962-49486225   | 0.0001 | 0.0883 | 9.7860  | 0.227517 |
| Gm6981        | chr9:52002273-52003281   | 0.0636 | 0.1643 | 1.3678  | 0.638563 |
| Cyp1a1        | chr9:57697612-57703822   | 0.0083 | 0.1196 | 3.8566  | 0.131879 |
| Cyp11a1       | chr9:58015012-58027020   | 0.0001 | 0.3862 | 11.9152 | 0.079315 |
| Islr          | chr9:58156264-58159221   | 0.0001 | 0.1370 | 10.4200 | 0.216923 |
| Cd276         | chr9:58524299-58555132   | 0.0001 | 0.0628 | 9.2955  | 0.436588 |
| Hcn4          | chr9:58823511-58860955   | 0.0057 | 0.0655 | 3.5158  | 0.475531 |
| Gm7613        | chr9:59766716-59767203   | 0.0001 | 0.4779 | 12.2225 | 0.333259 |
| 1110036E04Rik | chr9:64049828-64054100   | 0.0001 | 0.1776 | 10.7942 | 0.436588 |
| Mir3109       | chr9:69456943-69457031   | 0.0001 | 2.5719 | 14.6505 | 0.161248 |
| 4930509E16Rik | chr9:72518261-72531858   | 0.0001 | 0.6004 | 12.5517 | 0.095163 |
| NA            | chr9:86546681-86546795   | 0.7493 | 4.9348 | 2.7193  | 0.237771 |
| Me1           | chr9:86581362-86695914   | 0.0001 | 0.0509 | 8.9917  | 0.436588 |
| Rasgrf1       | chr9:89909774-90026976   | 0.0001 | 0.1117 | 10.1254 | 0.183544 |
| 1300017J02Rik | chr9:103250521-103305082 | 0.0001 | 0.1765 | 10.7858 | 0.100511 |
| Ackr4         | chr9:104098137-104126643 | 0.0102 | 0.4361 | 5.4146  | 0.052057 |
| Gm10030       | chr9:111004810-111006830 | 0.0001 | 0.7662 | 12.9035 | 0.436588 |
| Rps27rt       | chr9:114982398-114982739 | 0.0001 | 1.0205 | 13.3170 | 0.299410 |
| Gm5921        | chr9:115437699-115438581 | 0.1045 | 0.4182 | 2.0007  | 0.219076 |
| Gm22198       | chr9:118287785-118288092 | 0.2088 | 0.8148 | 1.9646  | 0.499439 |
| Gm22729       | chr9:119306628-119306757 | 1.1588 | 1.9434 | 0.7460  | 0.748716 |
| Ttc21a        | chr9:119937605-119967793 | 0.0001 | 0.0383 | 8.5803  | 0.359222 |
| Entpd3        | chr9:120539817-120568318 | 0.0001 | 0.2119 | 11.0494 | 0.033469 |
| Ackr2         | chr9:121898463-121911064 | 0.0001 | 0.0841 | 9.7159  | 0.403357 |
| Gm17020       | chr9:123762502-123762776 | 0.0001 | 1.4092 | 13.7826 | 0.436588 |
| Rpl22-ps1     | chrX:8038610-8038996     | 0.1452 | 1.2370 | 3.0904  | 0.192912 |
| Gm9430        | chrX:8662301-8663828     | 0.0001 | 0.2070 | 11.0157 | 0.386896 |
| Gm14537       | chrX:20391708-20392501   | 0.0001 | 0.4952 | 12.2739 | 0.125873 |
| Gria3         | chrX:41400853-41678601   | 0.0001 | 0.0291 | 8.1837  | 0.298530 |
| Mir20b        | chrX:52742112-52742192   | 0.8008 | 3.9646 | 2.3076  | 0.533915 |
| Brs3          | chrX:57043073-57048758   | 0.0001 | 0.0747 | 9.5453  | 0.436588 |
| Gm25412       | chrX:61938890-61938997   | 0.0001 | 1.5466 | 13.9168 | 0.436588 |
| Gm10474       | chrX:68667513-68678399   | 0.0001 | 0.1349 | 10.3976 | 0.242809 |
| Gabre         | chrX:72255998-72274803   | 0.0001 | 0.0549 | 9.1000  | 0.163063 |
| Gm8545        | chrX:74006701-74007502   | 0.0001 | 0.2232 | 11.1240 | 0.392802 |
| Rpl3-ps2      | chrX:74170652-74171866   | 0.0808 | 0.4817 | 2.5759  | 0.195488 |
| Gm15385       | chrX:75459962-75485753   | 0.0001 | 0.3948 | 11.9471 | 0.276195 |
| Gm5939        | chrX:78855407-78858281   | 0.0096 | 0.1315 | 3.7787  | 0.010831 |
| Gjb1          | chrX:101376377-101385629 | 0.0001 | 0.1132 | 10.1446 | 0.436588 |
| H3f3a-ps1     | chrX:101824514-101824924 | 0.0001 | 0.4876 | 12.2516 | 0.232069 |
| Pin4          | chrX:102119446-102127669 | 0.1969 | 0.5001 | 1.3447  | 0.328897 |
| Phka1         | chrX:102513974-102644246 | 0.0001 | 0.0732 | 9.5149  | 0.187519 |
| Gm9200        | chrX:106641380-106642734 | 0.1203 | 0.1899 | 0.6580  | 0.638446 |
| Gm26415       | chrX:109115224-109115516 | 0.0001 | 2.2476 | 14.4561 | 0.167914 |
| Gm7973        | chrX:136340180-136340668 | 0.2884 | 1.2595 | 2.1270  | 0.389238 |
| Gm8097        | chrX:140445553-140446382 | 0.0774 | 0.2628 | 1.7639  | 0.428433 |
| Vsig1         | chrX:140907607-140939472 | 0.0001 | 0.0599 | 9.2260  | 0.436588 |
| Phex          | chrX:157162074-157415312 | 0.0001 | 0.0572 | 9.1608  | 0.160279 |
| Gm6568        | chrX:157540865-157541562 | 0.0001 | 0.2608 | 11.3489 | 0.383314 |
| Arhgap6       | chrX:168795098-169304435 | 0.0124 | 0.0480 | 1.9513  | 0.151652 |

|               |                          |        |         |         |          |
|---------------|--------------------------|--------|---------|---------|----------|
| Gm15261       | chrX:169037673-169106536 | 0.0001 | 0.0659  | 9.3647  | 0.274089 |
| Osmr          | chr15:6813576-6874969    | 0.0001 | 0.0178  | 7.4748  | 0.298530 |
| Erich5        | chr15:34453311-34473892  | 0.0001 | 0.0755  | 9.5612  | 0.436588 |
| Gm22106       | chr15:73729163-73729290  | 0.0001 | 3.1859  | 14.9594 | 0.126431 |
| Mroh5         | chr15:73761409-73839699  | 0.0229 | 0.0586  | 1.3574  | 0.408153 |
| Gm6506        | chr15:77443284-77444420  | 0.0720 | 0.2049  | 1.5081  | 0.536922 |
| Gm8221        | chr15:77626073-77626637  | 0.3030 | 0.3916  | 0.3701  | 0.825605 |
| Sstr3         | chr15:78537014-78544345  | 0.0001 | 0.0707  | 9.4653  | 0.164059 |
| Gm17597       | chr15:81800790-81802613  | 0.1963 | 0.3615  | 0.8807  | 0.514204 |
| Prr5          | chr15:84669619-84703673  | 0.0001 | 0.2100  | 11.0361 | 0.412982 |
| Gm26760       | chr15:92344358-92378088  | 0.0001 | 0.1634  | 10.6746 | 0.436588 |
| Gm4335        | chr15:93196594-93197598  | 0.0485 | 0.2624  | 2.4354  | 0.423466 |
| Adamts20      | chr15:94270162-94465418  | 0.0001 | 0.0443  | 8.7915  | 0.241091 |
| Rapgef3os2    | chr15:97766548-97768713  | 0.0001 | 0.5371  | 12.3911 | 0.240105 |
| Ccdc184       | chr15:98167805-98170134  | 0.0734 | 0.2399  | 1.7076  | 0.088667 |
| Gm2888        | chr14:3030001-3038762    | 0.0001 | 0.2264  | 11.1447 | 0.436588 |
| D830030K2ORik | chr14:3224439-3234351    | 0.0001 | 0.1866  | 10.8658 | 0.400356 |
| Gm3373        | chr14:5718335-5741577    | 0.0838 | 0.1488  | 0.8278  | 0.745501 |
| Gm8206        | chr14:6016758-6038209    | 0.0001 | 0.1830  | 10.8378 | 0.329439 |
| Gm26680       | chr14:6684254-6783942    | 0.0001 | 0.1400  | 10.4508 | 0.272861 |
| Gm3512        | chr14:7153510-7174533    | 0.1255 | 0.3350  | 1.4160  | 0.065761 |
| Rpl19-ps4     | chr14:13777813-13778440  | 0.3913 | 0.8470  | 1.1141  | 0.264768 |
| Gm22485       | chr14:27489268-27489377  | 1.1755 | 6.4769  | 2.4620  | 0.195039 |
| Gm5459        | chr14:31076634-31077447  | 0.3017 | 0.7937  | 1.3955  | 0.507123 |
| Tlr11         | chr14:50360501-50363662  | 0.0204 | 0.0889  | 2.1263  | 0.486054 |
| Trav8d-2      | chr14:53042427-53042891  | 0.7563 | 1.9869  | 1.3936  | 0.341780 |
| Trav13d-4     | chr14:53073003-53073267  | 0.4045 | 1.6520  | 2.0299  | 0.251877 |
| Traj54        | chr14:54161989-54162043  | 0.7909 | 11.2495 | 3.8301  | 0.027472 |
| Traj29        | chr14:54190945-54191005  | 0.0001 | 2.9686  | 14.8575 | 0.346872 |
| Cbln3         | chr14:55878919-55884256  | 0.0001 | 0.0974  | 9.9282  | 0.037101 |
| Pnoc          | chr14:65400672-65425472  | 0.0001 | 0.2954  | 11.5285 | 0.135820 |
| Gulo          | chr14:65986786-66009210  | 0.0001 | 0.0787  | 9.6209  | 0.346872 |
| Mir687        | chr14:73206762-73206851  | 1.1997 | 8.6603  | 2.8517  | 0.057833 |
| Pnlcd1        | chr17:12888901-12910000  | 0.0001 | 0.3551  | 11.7939 | 0.073399 |
| Abca17        | chr17:24264258-24351029  | 0.0001 | 0.0842  | 9.7172  | 0.058815 |
| Npw           | chr17:24657329-24658425  | 0.0001 | 0.3367  | 11.7171 | 0.247046 |
| Rpl3l         | chr17:24727819-24736143  | 0.0781 | 0.2604  | 1.7376  | 0.502279 |
| 1700049J03Rik | chr17:26554253-26561496  | 0.0001 | 0.6748  | 12.7202 | 0.186976 |
| Lhfp15        | chr17:28575717-28583593  | 0.0001 | 0.4618  | 12.1731 | 0.111595 |
| Pde9a         | chr17:31386233-31476310  | 0.0001 | 0.1335  | 10.3824 | 0.279562 |
| Gm24970       | chr17:31564961-31565043  | 0.0001 | 2.4147  | 14.5595 | 0.337029 |
| Snord52       | chr17:34950951-34951017  | 0.3236 | 6.6093  | 4.3521  | 0.016773 |
| Gm25744       | chr17:34952012-34952075  | 1.9753 | 9.1660  | 2.2142  | 0.001894 |
| NA            | chr17:34952239-34952309  | 0.9152 | 6.3792  | 2.8012  | 0.235625 |
| Gm20442       | chr17:35743322-35764191  | 0.0001 | 0.5326  | 12.3789 | 0.436588 |
| H2-T3         | chr17:36185571-36190287  | 0.0260 | 0.1718  | 2.7229  | 0.125754 |
| Olf754-ps1    | chr17:37249474-37250867  | 0.0001 | 0.4219  | 12.0427 | 0.301583 |
| Gm18737       | chr17:37860806-37861743  | 0.0001 | 0.3769  | 11.8798 | 0.016863 |
| Glyatl3       | chr17:40904740-40914350  | 0.0001 | 0.4266  | 12.0586 | 0.436588 |
| Tmem151b      | chr17:45541939-45549677  | 0.0001 | 0.1638  | 10.6778 | 0.060432 |
| Gm22474       | chr17:46232724-46232831  | 0.0001 | 3.7267  | 15.1856 | 0.397459 |
| Lrrc73        | chr17:46254164-46257316  | 0.2392 | 0.5020  | 1.0696  | 0.617415 |
| Gnmt          | chr17:46725663-46729168  | 0.0001 | 0.4570  | 12.1579 | 0.042059 |
| Al661453      | chr17:47436614-47470638  | 0.0001 | 0.0479  | 8.9048  | 0.314057 |
| 1700122O11Rik | chr17:48036744-48038293  | 0.0001 | 0.2863  | 11.4831 | 0.436588 |
| Dazl          | chr17:50279393-50293599  | 0.0364 | 0.1300  | 1.8370  | 0.487945 |
| Ef1b          | chr17:53398888-53463321  | 0.0001 | 0.0770  | 9.5881  | 0.280845 |
| Rpl7a-ps5     | chr17:57838426-57839233  | 0.0001 | 0.2517  | 11.2977 | 0.267498 |
| Nudt12        | chr17:58999617-59013372  | 0.0341 | 0.1293  | 1.9245  | 0.248217 |
| Gm24730       | chr17:63202737-63202854  | 1.3972 | 4.5121  | 1.6912  | 0.179553 |
| Vit           | chr17:78508062-78627409  | 0.0629 | 0.1016  | 0.6911  | 0.708391 |
| Ttc39d        | chr17:80207459-80217936  | 0.1621 | 0.1740  | 0.1021  | 0.919507 |
| 0610012D04Rik | chr17:87362238-87364462  | 0.0403 | 0.7333  | 4.1851  | 0.340812 |
| Fgd4          | chr16:16416916-16600549  | 0.0001 | 0.0271  | 8.0842  | 0.060014 |
| Spag6         | chr16:16753015-16829456  | 0.0001 | 0.0665  | 9.3776  | 0.411062 |
| Rimbp3        | chr16:17208134-17213971  | 0.0001 | 0.0581  | 9.1827  | 0.109790 |
| Tssk1         | chr16:17894202-17895651  | 0.0738 | 0.3338  | 2.1777  | 0.384980 |
| Gm15799       | chr16:18937400-18937689  | 1.4396 | 1.8661  | 0.3743  | 0.561598 |
| Gm25617       | chr16:38158007-38158139  | 0.0001 | 2.5834  | 14.6570 | 0.161611 |
| Gm25989       | chr16:43886681-43886814  | 0.0001 | 4.1112  | 15.3273 | 0.068160 |
| Gm16619       | chr16:49800532-49804874  | 0.3086 | 0.4815  | 0.6417  | 0.537238 |

|               |                          |        |        |         |          |
|---------------|--------------------------|--------|--------|---------|----------|
| Gm25292       | chr16:84619806-84620128  | 0.0001 | 0.5140 | 12.3275 | 0.436588 |
| 2810404F17Rik | chr16:95806028-95808317  | 0.0001 | 0.1454 | 10.5061 | 0.405248 |
| 1700093J21Rik | chr16:96082675-96089070  | 0.0001 | 0.6240 | 12.6072 | 0.366620 |
| Acy3          | chr19:3986660-3990007    | 0.0001 | 0.2875 | 11.4895 | 0.278638 |
| Cabp4         | chr19:4135424-4139609    | 0.0001 | 0.5629 | 12.4586 | 0.021472 |
| Olfr1444      | chr19:12861741-12862771  | 0.0001 | 0.3202 | 11.6447 | 0.125811 |
| Gm10819       | chr19:16267060-16267621  | 0.0500 | 0.5654 | 3.4985  | 0.476622 |
| Lipm          | chr19:34100942-34122687  | 0.0001 | 0.2405 | 11.2321 | 0.224565 |
| Cpeb3         | chr19:37021290-37208601  | 0.0030 | 0.0949 | 4.9930  | 0.378181 |
| Abcc2         | chr19:43782191-43837951  | 0.0001 | 0.0697 | 9.4457  | 0.436588 |
| 4930556I23Rik | chr1:37614258-37615372   | 0.0382 | 1.2555 | 5.0374  | 0.352507 |
| 4933402D24Rik | chr1:63754906-63769267   | 0.0365 | 0.2745 | 2.9092  | 0.099792 |
| Rpl31-ps14    | chr1:66948562-66948940   | 0.3919 | 1.0336 | 1.3991  | 0.146842 |
| Gm24497       | chr1:72244212-72244403   | 0.0001 | 2.3895 | 14.5444 | 0.379254 |
| Cxcr1         | chr1:74191784-74194631   | 0.0001 | 0.7917 | 10.9193 | 0.256921 |
| Slc23a3       | chr1:75125543-75133890   | 0.0001 | 0.1531 | 10.5803 | 0.207811 |
| Gm7582        | chr1:85027953-85041958   | 0.0709 | 1.3749 | 4.2770  | 0.229780 |
| Gm20528       | chr1:88055392-88218584   | 0.0001 | 0.3128 | 11.6112 | 0.168502 |
| Dnajb3        | chr1:88204731-88205748   | 0.2993 | 0.4664 | 0.6399  | 0.615397 |
| Agap1         | chr1:89454810-89895282   | 0.0001 | 0.0618 | 9.2709  | 0.049588 |
| Gm3555        | chr1:98457767-98459162   | 0.0001 | 0.2069 | 11.0144 | 0.381995 |
| Gm23370       | chr1:127331812-127331941 | 0.0001 | 2.3375 | 14.5127 | 0.080248 |
| Gm23734       | chr1:127375130-127375239 | 0.0001 | 5.7452 | 15.8101 | 0.347016 |
| Zp3r          | chr1:130576712-130629621 | 0.0001 | 0.0846 | 9.7248  | 0.436588 |
| Syt2          | chr1:134709299-134753149 | 0.0001 | 0.0339 | 8.4063  | 0.333259 |
| Gm7278        | chr1:152729158-152730559 | 0.0001 | 0.3004 | 11.5529 | 0.203974 |
| Gm5532        | chr1:155520172-155527111 | 0.0611 | 0.2262 | 1.8888  | 0.446613 |
| Gm27512       | chr1:155936949-155937075 | 0.0001 | 2.6267 | 14.6809 | 0.436588 |
| 4930558K02Rik | chr1:161942085-161979636 | 0.0001 | 0.1764 | 10.7843 | 0.359222 |
| Gm16587       | chr1:164143431-164146366 | 0.0001 | 0.3225 | 11.6552 | 0.402194 |
| Mplz1         | chr1:165592180-165634541 | 0.0348 | 0.0951 | 1.4509  | 0.443125 |
| Gm6286        | chr1:166945596-166946358 | 0.2330 | 1.0681 | 2.1965  | 0.214164 |
| Gm16701       | chr1:166974023-167000841 | 0.0001 | 0.2877 | 11.4901 | 0.121734 |
| Gm22114       | chr1:169799449-169799556 | 0.0001 | 1.8043 | 14.1392 | 0.436588 |
| Gm25235       | chr1:170832764-170832871 | 0.0001 | 3.5257 | 15.1056 | 0.125267 |
| Gm16340       | chr1:173775836-173802720 | 0.0001 | 0.0972 | 9.9243  | 0.195810 |
| Spta1         | chr1:174172775-174248450 | 0.0199 | 0.0257 | 0.3675  | 0.873644 |
| Mark1         | chr1:184896442-184999549 | 0.0001 | 0.0537 | 9.0684  | 0.209697 |
| Mir215        | chr1:185313580-185313692 | 0.0001 | 2.2178 | 14.4368 | 0.252556 |
| Mir3473c      | chr1:191998553-191998634 | 0.0001 | 3.0289 | 14.8865 | 0.274808 |
| Bambi         | chr18:3507956-3516404    | 0.0001 | 0.1834 | 10.8408 | 0.108150 |
| Zscan30       | chr18:23970974-23981555  | 0.0001 | 1.2695 | 13.6319 | 0.039877 |
| Kcnn2         | chr18:45269004-45686024  | 0.0001 | 0.2060 | 11.0084 | 0.084262 |
| Gm4950        | chr18:51865263-51865881  | 0.0001 | 0.4157 | 12.0212 | 0.205185 |
| 4930511M06Rik | chr18:57373454-57552397  | 0.0104 | 0.1927 | 4.2166  | 0.232875 |
| Gm9949        | chr18:62180125-62184405  | 0.2941 | 0.7291 | 1.3096  | 0.137294 |
| Rab27b        | chr18:69979130-70141605  | 0.0101 | 0.0653 | 2.6932  | 0.457850 |
| Gm13216       | chr2:5603570-5604161     | 0.2581 | 1.0159 | 1.9771  | 0.037707 |
| Gm13218       | chr2:9591218-9597843     | 0.4030 | 1.4764 | 1.8733  | 0.415497 |
| Gm23608       | chr2:10075652-10075780   | 0.3337 | 1.6264 | 2.2849  | 0.410452 |
| Gm23651       | chr2:10482811-10482931   | 0.0001 | 2.4544 | 14.5831 | 0.370410 |
| Enkur         | chr2:21180730-21205365   | 0.0685 | 0.2205 | 1.6867  | 0.351203 |
| Gm14441       | chr2:22913292-22913832   | 0.1706 | 1.2542 | 2.8781  | 0.167494 |
| Gm24875       | chr2:25031349-25031453   | 0.0001 | 5.6327 | 15.7815 | 0.143270 |
| Gm13387       | chr2:25122602-25145396   | 0.0297 | 0.1148 | 1.9488  | 0.350784 |
| Grin1         | chr2:25291180-25319187   | 0.0226 | 0.0341 | 0.5954  | 0.788134 |
| Grin1os       | chr2:25291219-25298925   | 0.0755 | 0.0667 | -0.1791 | 0.930080 |
| Gm10134       | chr2:28506094-28506475   | 0.0001 | 0.5777 | 12.4960 | 0.401224 |
| Gm13420       | chr2:29744918-29747250   | 0.0352 | 0.8165 | 4.5350  | 0.086098 |
| Gm13547       | chr2:29759311-29768998   | 0.0354 | 0.3329 | 3.2345  | 0.382164 |
| Gm14486       | chr2:30658467-30678011   | 0.0542 | 0.4468 | 3.0444  | 0.290746 |
| Gm13536       | chr2:33446801-33449207   | 0.0001 | 0.4881 | 12.2529 | 0.234827 |
| NA            | chr2:34778676-34778772   | 1.5571 | 5.7492 | 1.8845  | 0.425898 |
| Gm13429       | chr2:36202313-36212903   | 0.0001 | 0.2402 | 11.2301 | 0.315776 |
| Rnd3          | chr2:51130437-51149111   | 0.0001 | 0.0680 | 9.4087  | 0.197526 |
| Gm13495       | chr2:51938132-51938669   | 0.1044 | 1.1341 | 3.4411  | 0.257850 |
| Gm13541       | chr2:52551968-52552251   | 0.0001 | 1.0233 | 13.3210 | 0.436588 |
| Gm13590       | chr2:62668782-62670370   | 0.0001 | 0.1350 | 10.3990 | 0.298530 |
| Nostrin       | chr2:69135799-69189330   | 0.0566 | 0.3079 | 2.4423  | 0.257570 |
| Gm13624       | chr2:69799150-69799612   | 0.0001 | 1.0052 | 13.2952 | 0.330645 |
| Klh23         | chr2:69821943-69836651   | 0.0391 | 0.1097 | 1.4870  | 0.467508 |

|               |                          |        |        |         |          |
|---------------|--------------------------|--------|--------|---------|----------|
| Sp9           | chr2:73271924-73284706   | 0.0001 | 0.0635 | 9.3099  | 0.406738 |
| Gm14425       | chr2:74855705-74856311   | 0.1058 | 1.0475 | 3.3075  | 0.060008 |
| Gm13743       | chr2:87562996-87563720   | 0.0886 | 1.2544 | 3.8239  | 0.406069 |
| Gm10805       | chr2:91920527-91920928   | 0.0536 | 0.7692 | 3.8427  | 0.258242 |
| Gm13868       | chr2:102311913-102312207 | 0.0001 | 3.6774 | 15.1664 | 0.285816 |
| Elf5          | chr2:103411687-103450989 | 0.0001 | 0.1283 | 10.3258 | 0.191064 |
| n-R5s201      | chr2:105997031-105997147 | 0.0001 | 3.4716 | 15.0833 | 0.174026 |
| Kcna4         | chr2:107290638-107298502 | 0.0001 | 0.0795 | 9.6350  | 0.353491 |
| Gm13961       | chr2:111182634-111187406 | 0.0104 | 0.0972 | 3.2182  | 0.281827 |
| Fbn1          | chr2:125300593-125507993 | 0.0001 | 0.0126 | 6.9781  | 0.436588 |
| Gm14009       | chr2:128189986-128204634 | 0.0326 | 0.6062 | 4.2146  | 0.381158 |
| Snord110      | chr2:130275505-130275573 | 0.0001 | 4.7884 | 15.5473 | 0.206983 |
| Gm14068       | chr2:140044491-140044704 | 0.0001 | 3.2172 | 14.9735 | 0.037483 |
| 4930444E06Rik | chr2:144243240-144244849 | 0.0001 | 0.5728 | 12.4839 | 0.129742 |
| Gm14130       | chr2:149743174-149744161 | 0.0285 | 0.2669 | 3.2287  | 0.383959 |
| Gm14133       | chr2:149743926-149798743 | 0.0196 | 0.1835 | 3.2261  | 0.383959 |
| Gm14127       | chr2:150469410-150470165 | 0.0001 | 0.5180 | 12.3388 | 0.147077 |
| Nanp          | chr2:151029684-151039398 | 0.0001 | 0.3717 | 11.8601 | 0.069548 |
| Gm14148       | chr2:151374007-151375047 | 0.0001 | 0.3277 | 11.6783 | 0.156916 |
| Tmem74b       | chr2:151702007-151712157 | 0.0001 | 0.1444 | 10.4956 | 0.294753 |
| Id1           | chr2:152736250-152737410 | 0.1105 | 0.5751 | 2.3792  | 0.050548 |
| Gm14170       | chr2:156377924-156378968 | 0.0001 | 0.5833 | 12.5101 | 0.436588 |
| Myl9          | chr2:156775419-156781658 | 0.0001 | 0.4973 | 12.2798 | 0.351616 |
| Gm14231       | chr2:156789809-156790403 | 0.0720 | 1.0864 | 3.9156  | 0.139579 |
| Gm14286       | chr2:157544265-157545469 | 0.1842 | 1.1154 | 2.5984  | 0.305307 |
| Gm10714       | chr2:174125037-174183918 | 0.0001 | 0.4098 | 12.0009 | 0.436588 |
| Mir296        | chr2:174267046-174267125 | 0.0001 | 2.7564 | 14.7505 | 0.256921 |
| Tubb1         | chr2:174450694-174457882 | 0.0001 | 0.5067 | 12.3068 | 0.255664 |
| Gm14418       | chr2:177387123-177398320 | 0.0088 | 0.1989 | 4.4906  | 0.401090 |
| Tcf5          | chr2:180621955-180642708 | 0.0001 | 0.1676 | 10.7107 | 0.346922 |
| Gm22502       | chr2:180698062-180698169 | 0.5093 | 2.0867 | 2.0345  | 0.301745 |
| Lkaear1       | chr2:181696792-181698442 | 0.1859 | 0.5167 | 1.4746  | 0.541944 |
| Rps24-ps2     | chr3:3791896-3792295     | 0.3860 | 1.4484 | 1.9077  | 0.448603 |
| Il7           | chr3:7572076-7613427     | 0.0001 | 0.3219 | 11.6524 | 0.054849 |
| Raly1         | chr3:13946371-14182287   | 0.0001 | 0.1377 | 10.4275 | 0.192645 |
| Gm22282       | chr3:19330772-19331084   | 0.0001 | 0.7956 | 12.9579 | 0.436588 |
| Lrrc31        | chr3:30679057-30699843   | 0.0001 | 0.0506 | 8.9823  | 0.436588 |
| Gm23511       | chr3:48954721-48954885   | 0.8937 | 2.5795 | 1.5292  | 0.202173 |
| Gm20690       | chr3:68901829-68902144   | 0.0001 | 0.7370 | 12.8474 | 0.298517 |
| Rxfp1         | chr3:79641610-79737880   | 0.0001 | 0.0179 | 7.4865  | 0.436588 |
| Cd5l          | chr3:87357880-87371074   | 0.0001 | 0.1561 | 10.6087 | 0.267567 |
| Fcrl5         | chr3:87435884-87457836   | 0.0590 | 0.2361 | 2.0001  | 0.469509 |
| Gm6570        | chr3:87679650-87679998   | 0.8002 | 1.1761 | 0.5557  | 0.506317 |
| Ntrk1         | chr3:87778243-87795162   | 0.0001 | 0.0587 | 9.1975  | 0.436588 |
| Bglap         | chr3:88383500-88384464   | 0.0001 | 0.3794 | 11.8896 | 0.436588 |
| Gm24046       | chr3:89967998-89968163   | 1.8303 | 2.4046 | 0.3937  | 0.674024 |
| Tchh          | chr3:93442329-93449077   | 0.0001 | 0.0862 | 9.7516  | 0.398312 |
| Gm9169        | chr3:95144370-95144906   | 0.3188 | 0.7055 | 1.1460  | 0.497907 |
| Gja8          | chr3:96918862-96926020   | 0.0001 | 0.1092 | 10.0929 | 0.436588 |
| Vangl1        | chr3:102156700-102204693 | 0.0001 | 0.0886 | 9.7914  | 0.056444 |
| BC027582      | chr3:103731679-103732553 | 0.0001 | 0.3603 | 11.8152 | 0.334795 |
| Chil6         | chr3:106387387-106406182 | 0.0001 | 0.2218 | 11.1148 | 0.306099 |
| Gstm7         | chr3:107926333-107931817 | 0.0001 | 0.1275 | 10.3162 | 0.247046 |
| Gm9857        | chr3:108940052-108940445 | 0.0001 | 1.2562 | 13.6168 | 0.058302 |
| Gm5548        | chr3:113053888-113054284 | 0.0001 | 0.3831 | 11.9037 | 0.436588 |
| Pitx2         | chr3:129199877-129219591 | 0.0001 | 0.0491 | 8.9409  | 0.347016 |
| Col25a1       | chr3:130180890-130599877 | 0.0001 | 0.0161 | 7.3272  | 0.436588 |
| Gm25920       | chr3:137912989-137913088 | 0.2158 | 3.3801 | 3.9694  | 0.119135 |
| Gm24457       | chr3:142772971-142773076 | 0.0001 | 4.9413 | 15.5926 | 0.163063 |
| Samd13        | chr3:146645194-146685592 | 0.0001 | 0.1992 | 10.9600 | 0.028691 |
| Gm22136       | chr3:153621701-153621969 | 0.0001 | 2.3204 | 14.5021 | 0.034726 |
| Gm22206       | chr3:153708910-153709026 | 0.0001 | 3.0759 | 14.9087 | 0.369990 |
| mt-Tw         | chrM:4949-5016           | 0.3188 | 9.6655 | 4.9221  | 0.228329 |
| mt-Tt         | chrM:15288-15355         | 1.5936 | 6.5114 | 2.0307  | 0.171660 |
| Gm23860       | chr4:7820915-7821047     | 0.0001 | 1.7090 | 14.0609 | 0.349480 |
| Gm22940       | chr4:11279264-11279419   | 0.0001 | 2.7002 | 14.7208 | 0.197352 |
| Gm11869       | chr4:15969571-15969928   | 0.3246 | 1.0392 | 1.6787  | 0.497856 |
| Gm11865       | chr4:16246268-16249514   | 0.1990 | 0.4401 | 1.1454  | 0.422599 |
| Gm11934       | chr4:33303568-33310137   | 0.0001 | 0.1665 | 10.7015 | 0.320677 |
| Gm12366       | chr4:35202102-35202975   | 0.0001 | 0.2041 | 10.9952 | 0.346872 |
| Mir207        | chr4:40722916-40722995   | 0.0001 | 7.0647 | 16.1083 | 0.029900 |

|               |                           |        |        |         |          |
|---------------|---------------------------|--------|--------|---------|----------|
| Gm24650       | chr4:41172741-41172844    | 0.0001 | 3.0174 | 14.8810 | 0.341542 |
| Gm12401       | chr4:41252616-41252844    | 0.0938 | 2.3214 | 4.6300  | 0.168175 |
| Ccin          | chr4:43983503-43985533    | 0.0001 | 0.1887 | 10.8818 | 0.095985 |
| Gm12430       | chr4:47453631-47454953    | 0.0001 | 0.3181 | 11.6352 | 0.207976 |
| Gm11405       | chr4:74228196-74229752    | 0.0001 | 0.1512 | 10.5626 | 0.279417 |
| Gm23412       | chr4:83285803-83285910    | 0.7983 | 5.2875 | 2.7275  | 0.238270 |
| NA            | chr4:88760773-88761584    | 0.0001 | 0.7135 | 12.8007 | 0.014241 |
| Gm12632       | chr4:90856882-90857377    | 0.0001 | 0.8956 | 13.1286 | 0.223825 |
| Gm12656       | chr4:94497031-94497608    | 0.0001 | 0.6947 | 12.7622 | 0.227517 |
| Gm12694       | chr4:94979202-95028544    | 0.0001 | 0.3488 | 11.7683 | 0.376034 |
| Gm26154       | chr4:98661636-98661732    | 0.0001 | 2.9244 | 14.8358 | 0.367054 |
| Gm12710       | chr4:103103526-103103742  | 0.0001 | 1.0505 | 13.3588 | 0.208195 |
| Gm12728       | chr4:105794218-105794711  | 0.1122 | 0.5922 | 2.4003  | 0.306716 |
| Skint3        | chr4:112232244-112300468  | 0.0001 | 0.0479 | 8.9034  | 0.271228 |
| NA            | chr4:116733597-116733832  | 0.5453 | 2.2299 | 2.0319  | 0.556853 |
| Best4-ps      | chr4:117145256-117148637  | 0.0156 | 0.2881 | 4.2096  | 0.143141 |
| Gm13015       | chr4:117148922-117149126  | 0.3141 | 2.2465 | 2.8383  | 0.278465 |
| Gm22980       | chr4:117154092-117154162  | 0.0001 | 2.3640 | 14.5290 | 0.436588 |
| Gm23287       | chr4:117210843-117210959  | 0.0001 | 5.7338 | 15.8072 | 0.369288 |
| Gm23382       | chr4:118164077-118164181  | 0.0001 | 3.5801 | 15.1277 | 0.436588 |
| Rimkla        | chr4:119465282-119492628  | 0.0001 | 0.1433 | 10.4845 | 0.284362 |
| Gm12946       | chr4:126145978-126147735  | 0.0412 | 0.6716 | 4.0254  | 0.303633 |
| Oprd1         | chr4:132110725-132144486  | 0.0001 | 0.1351 | 10.3995 | 0.401299 |
| Gm16225       | chr4:135118220-135120447  | 0.0001 | 1.2529 | 13.6130 | 0.267870 |
| Gm26226       | chr4:140918683-140918799  | 0.3683 | 2.3241 | 2.6579  | 0.198332 |
| Slc25a34      | chr4:141618823-141623821  | 0.0001 | 0.1998 | 10.9645 | 0.154228 |
| Gm26763       | chr4:145601962-145711968  | 0.0001 | 0.3319 | 11.6964 | 0.104684 |
| Gm13247       | chr4:146502026-146539395  | 0.0001 | 0.0649 | 9.3427  | 0.319197 |
| Gm13136       | chr4:147735476-147738426  | 0.0146 | 0.1024 | 2.8118  | 0.427250 |
| Gm23318       | chr4:148555696-148555804  | 0.0001 | 1.7998 | 14.1356 | 0.290933 |
| Gm13112       | chr4:154864505-154872003  | 0.0001 | 0.1693 | 10.7255 | 0.364228 |
| Vva1          | chr4:155768148-155774698  | 0.0076 | 0.1832 | 4.5875  | 0.034636 |
| Gm13648       | chr4:156052714-156059802  | 0.0696 | 0.4622 | 2.7313  | 0.076688 |
| Pde7b         | chr10:20398003-20725078   | 0.0178 | 0.0524 | 1.5567  | 0.375741 |
| Gm26464       | chr10:42820462-42820767   | 0.1838 | 2.4914 | 3.7609  | 0.198180 |
| Trpm2         | chr10:77907721-77970563   | 0.0001 | 0.0628 | 9.2937  | 0.200842 |
| Gm16104       | chr10:81409574-81411579   | 0.3196 | 0.6033 | 0.9166  | 0.615782 |
| Nuak1         | chr10:84370904-84440597   | 0.0077 | 0.0290 | 1.9150  | 0.566860 |
| Vvc2          | chr11:11114222-11268931   | 0.0248 | 0.0595 | 1.2609  | 0.433255 |
| Gm12009       | chr11:15049157-15050257   | 0.1668 | 0.3801 | 1.1881  | 0.308707 |
| Gm12328       | chr11:73771923-73772120   | 0.3851 | 1.5137 | 1.9749  | 0.259347 |
| C030013C21Rik | chr11:80507409-80509106   | 0.0001 | 0.3412 | 11.7365 | 0.158767 |
| Adam11        | chr11:102761438-102780262 | 0.0001 | 0.0514 | 9.0049  | 0.272923 |
| Gm8738        | chr11:103879914-103880243 | 0.0001 | 1.9587 | 14.2576 | 0.017271 |
| Z310007L24Rik | chr11:106365473-106377114 | 0.3256 | 0.4521 | 0.4733  | 0.632274 |
| Qrich2        | chr11:116441324-116455237 | 0.1535 | 0.1645 | 0.0999  | 0.923702 |
| Pde6g         | chr11:120447604-120453500 | 0.0001 | 0.0874 | 9.7713  | 0.317527 |
| 4930426L24Rik | chr12:76402756-76403654   | 0.0671 | 0.3016 | 2.1675  | 0.508720 |
| Gm17673       | chr12:83954498-83984852   | 0.0212 | 0.1373 | 2.6967  | 0.337574 |
| Gm26512       | chr12:90738200-90750693   | 0.0429 | 0.1641 | 1.9337  | 0.168341 |
| Gm22079       | chr12:108862563-108862669 | 0.0001 | 3.2844 | 15.0034 | 0.265903 |
| Mpc1-ps       | chr12:110858069-110858942 | 0.0735 | 0.5412 | 2.8809  | 0.394387 |
| Ighv9-4       | chr12:114299960-114300254 | 0.0001 | 1.2169 | 13.5709 | 0.436588 |
| Hist1h2aj     | chr13:21721441-21722131   | 0.2208 | 0.8374 | 1.9232  | 0.269667 |
| Gm24620       | chr13:46767519-46767649   | 0.0001 | 1.9858 | 14.2775 | 0.255082 |
| Gm15772       | chr5:3236388-3236907      | 0.0541 | 0.4466 | 3.0459  | 0.357480 |
| Tmem150c      | chr5:100077871-100159808  | 0.0001 | 0.0591 | 9.2074  | 0.193522 |
| Gm15547       | chr5:121530562-121530895  | 0.5772 | 2.0558 | 1.8325  | 0.333783 |
| Tspan33       | chr6:29694221-29718559    | 0.0001 | 0.0377 | 8.5569  | 0.436588 |
| Dennd2a       | chr6:39462377-39557867    | 0.0198 | 0.0402 | 1.0246  | 0.606646 |
| Fam131b       | chr6:42315311-42324643    | 0.0261 | 0.1572 | 2.5895  | 0.196702 |
| Igkv19-93     | chr6:68736301-68736583    | 0.0001 | 1.4730 | 13.8464 | 0.436588 |
| Gm15401       | chr6:72629287-72637717    | 0.1145 | 0.2389 | 1.0617  | 0.372347 |
| Clstn3        | chr6:124430758-124464794  | 0.0001 | 0.0381 | 8.5755  | 0.352193 |
| Klrc2         | chr6:129647495-129660689  | 0.0001 | 0.0542 | 9.0830  | 0.202684 |
| Klri1         | chr6:129697217-129717132  | 0.1530 | 0.1941 | 0.3437  | 0.881693 |
| Gm15873       | chr7:4526535-4528184      | 0.0001 | 0.4397 | 12.1022 | 0.222409 |
| Rtn2          | chr7:19282661-19296164    | 0.1073 | 0.1205 | 0.1682  | 0.924413 |
| Gm6096        | chr7:34251037-34251493    | 0.6496 | 1.0392 | 0.6778  | 0.323395 |
| Cpt1c         | chr7:44959372-44974851    | 0.0001 | 0.2260 | 11.1423 | 0.024106 |
| Izumo1        | chr7:45621810-45628823    | 0.0001 | 0.1003 | 9.9701  | 0.356900 |

|               |                          |        |         |         |          |
|---------------|--------------------------|--------|---------|---------|----------|
| lfitm6        | chr7:141015811-141016892 | 0.0001 | 1.0724  | 13.3886 | 0.229956 |
| Gm16425       | chr8:19535903-19538583   | 0.0001 | 0.1479  | 10.5307 | 0.038730 |
| Rps12l2       | chr8:36025752-36026133   | 0.1837 | 0.9303  | 2.3403  | 0.352722 |
| Gm16205       | chr8:37787665-37788692   | 0.0539 | 0.2958  | 2.4562  | 0.213934 |
| Barx2         | chr9:31846096-31913462   | 0.0001 | 0.1227  | 10.2608 | 0.334188 |
| Scn2b         | chr9:45117875-45130070   | 0.0001 | 0.1019  | 9.9930  | 0.061900 |
| Apoa5         | chr9:46268632-46271919   | 0.0001 | 0.0840  | 9.7151  | 0.436588 |
| Nxpe4         | chr9:48362040-48400025   | 0.0607 | 0.0741  | 0.2884  | 0.881821 |
| Gm7589        | chr9:59145673-59146210   | 0.4459 | 1.0075  | 1.1760  | 0.368105 |
| Gm23344       | chr9:64175047-64175115   | 0.0001 | 4.0803  | 15.3164 | 0.292424 |
| Plscr2        | chr9:92275601-92297752   | 0.0001 | 0.0595  | 9.2178  | 0.352193 |
| Pomgnt2       | chr9:121981605-121996026 | 0.0091 | 0.1267  | 3.7968  | 0.390136 |
| Rpl19-ps12    | chrX:6071221-6071812     | 0.0823 | 0.4862  | 2.5621  | 0.331784 |
| Xkrx          | chrX:134149042-134162076 | 0.0495 | 0.2854  | 2.5265  | 0.107830 |
| Gm15131       | chrX:150707020-150707615 | 0.2714 | 0.3934  | 0.5358  | 0.762585 |
| Gm7083        | chr15:59977721-59978171  | 0.0001 | 0.4298  | 12.0695 | 0.334490 |
| Khdrbs3       | chr15:68928419-69093512  | 0.0001 | 0.2223  | 11.1181 | 0.101596 |
| Elf2          | chr15:78670021-78718113  | 0.0001 | 0.0418  | 8.7085  | 0.317527 |
| Pnpla3        | chr15:84167815-84189512  | 0.0001 | 0.1949  | 10.9288 | 0.229380 |
| Gm8237        | chr14:5857917-5880382    | 0.0001 | 0.2350  | 11.1985 | 0.320209 |
| Gm6043        | chr14:29217638-29218130  | 0.1303 | 0.6576  | 2.3353  | 0.194078 |
| Trav6d-3      | chr14:52725298-52726917  | 0.0001 | 0.9204  | 13.1680 | 0.172103 |
| Trav16d-dv11  | chr14:53047286-53047821  | 0.3630 | 0.8033  | 1.1459  | 0.622606 |
| Gm15918       | chr14:63602523-63607372  | 0.1187 | 1.2976  | 3.4501  | 0.208569 |
| Cldn20        | chr17:3532553-3533213    | 0.0972 | 0.5826  | 2.5841  | 0.328046 |
| Gm26848       | chr17:6314198-6493180    | 0.0347 | 0.1875  | 2.4333  | 0.213299 |
| Btnl6         | chr17:34507803-34517352  | 0.0001 | 0.1156  | 10.1750 | 0.317527 |
| NA            | chr17:34507934-34517352  | 0.0001 | 0.1249  | 10.2870 | 0.317527 |
| Nudt12os      | chr17:58996250-59024981  | 0.0001 | 0.1744  | 10.7680 | 0.239478 |
| Gm22558       | chr16:17006106-17006201  | 0.0001 | 7.0144  | 16.0980 | 0.188970 |
| Z610203C22Rik | chr1:9560831-9631175     | 0.0001 | 0.0709  | 9.4692  | 0.200470 |
| A630095N17Rik | chr1:75220094-75232093   | 0.0001 | 0.2293  | 11.1632 | 0.392067 |
| Gm7609        | chr1:85199612-85213786   | 0.0001 | 0.0982  | 9.9400  | 0.274569 |
| Gm7592        | chr1:85526601-85552178   | 0.0434 | 0.2334  | 2.4266  | 0.144899 |
| Gm16094       | chr1:85599285-85599839   | 0.1501 | 1.2657  | 3.0757  | 0.181016 |
| Lefty1        | chr1:180935021-180938400 | 0.0001 | 0.1244  | 10.2807 | 0.326447 |
| Gm10136       | chr19:29003404-29003842  | 0.3230 | 0.8400  | 1.3788  | 0.276795 |
| Morn4         | chr19:42074938-42086370  | 0.0001 | 0.1383  | 10.4339 | 0.340955 |
| Sfrp5         | chr19:42197970-42202252  | 0.0718 | 0.1424  | 0.9878  | 0.675603 |
| Gm15959       | chr19:60815448-60815816  | 0.0581 | 1.2953  | 4.4781  | 0.306023 |
| Adamtsl2      | chr2:27079378-27108981   | 0.0135 | 0.0483  | 1.8432  | 0.282661 |
| Slc39a1-ps    | chr2:30159394-30160366   | 0.0001 | 0.2793  | 11.4475 | 0.239478 |
| Lcn2          | chr2:32384632-32387797   | 0.0001 | 0.5402  | 12.3992 | 0.291331 |
| C79798        | chr2:34287770-34304440   | 0.0239 | 0.1401  | 2.5503  | 0.427376 |
| Tcp11l1       | chr2:104657287-104712169 | 0.0125 | 0.0570  | 2.1877  | 0.287690 |
| Thbd          | chr2:148404470-148408188 | 0.0001 | 0.0482  | 8.9131  | 0.436588 |
| Rpl21-ps9     | chr2:156386740-156387222 | 0.0001 | 0.9243  | 13.1742 | 0.038537 |
| Fhod3         | chr18:24709444-25133500  | 0.0731 | 0.0869  | 0.2492  | 0.759182 |
| Lrrc34        | chr3:30624266-30647869   | 0.0001 | 0.1538  | 10.5869 | 0.272923 |
| Ccdc169       | chr3:55137338-55172935   | 0.0065 | 0.0954  | 3.8709  | 0.192832 |
| Gm5540        | chr3:65393300-65395231   | 0.0001 | 0.2635  | 11.3635 | 0.207271 |
| Rxfp4         | chr3:88651897-88653142   | 0.2266 | 0.3144  | 0.4722  | 0.795951 |
| Gm27024       | chr3:103179688-103180443 | 0.0284 | 0.5669  | 4.3200  | 0.153640 |
| Chil3         | chr3:106147553-106167564 | 0.0001 | 0.5321  | 12.3775 | 0.220010 |
| Gm11839       | chr4:12114283-12116236   | 0.0359 | 0.3714  | 3.3701  | 0.032392 |
| Gm11931       | chr4:33053837-33054284   | 0.0001 | 0.3947  | 11.9466 | 0.390226 |
| Gm12751       | chr4:34353979-34354854   | 0.1465 | 0.1859  | 0.3437  | 0.881693 |
| Gm12631       | chr4:88033500-88034998   | 0.2995 | 0.5101  | 0.7684  | 0.641148 |
| Gm12850       | chr4:107270433-107270869 | 0.0001 | 0.5549  | 12.4380 | 0.245280 |
| Ccdc24        | chr4:117866523-117872557 | 0.0191 | 0.0494  | 1.3705  | 0.585345 |
| D130007C19Rik | chr4:123902128-123903634 | 0.1679 | 0.1872  | 0.1566  | 0.905733 |
| Asap3         | chr4:136206364-136245216 | 0.0001 | 0.1286  | 10.3286 | 0.045559 |
| Fblim1        | chr4:141576061-141606096 | 0.0001 | 0.0603  | 9.2360  | 0.219799 |
| Gm17567       | chr10:33994988-33995054  | 0.0001 | 11.3113 | 16.7874 | 0.373020 |
| Mettl24       | chr10:40683281-40811083  | 0.0001 | 0.2286  | 11.1587 | 0.094992 |
| Gm15197       | chr10:42330785-42331263  | 0.0001 | 0.4804  | 12.2301 | 0.278417 |
| Gm15198       | chr10:42435879-42436065  | 1.2156 | 2.6735  | 1.1371  | 0.420143 |
| Gm23803       | chr10:59817665-59817797  | 0.0001 | 1.4634  | 13.8370 | 0.436588 |
| Pcbd1         | chr10:61089342-61094328  | 0.0529 | 0.7841  | 3.8900  | 0.270354 |
| Upb1          | chr10:75406910-75441679  | 0.0001 | 0.0708  | 9.4684  | 0.083261 |
| Gm16221       | chr10:75945294-75945687  | 0.0001 | 1.1700  | 13.5142 | 0.360986 |

|               |                           |        |        |         |          |
|---------------|---------------------------|--------|--------|---------|----------|
| Mir1930       | chr10:77641223-77641307   | 0.0001 | 4.9056 | 15.5821 | 0.214714 |
| Mirlet7i      | chr10:122985639-122985724 | 1.2561 | 4.6497 | 1.8881  | 0.326913 |
| Ndufa4i2      | chr10:127514938-127517152 | 0.1780 | 0.3180 | 0.8370  | 0.638827 |
| Gm11979       | chr11:6785837-6786580     | 0.0655 | 0.3234 | 2.3035  | 0.459479 |
| 4930554G24Rik | chr11:14072102-14179041   | 0.0001 | 0.2082 | 11.0240 | 0.436588 |
| Gm12713       | chr11:26409206-26410501   | 0.0001 | 0.6910 | 12.7545 | 0.283911 |
| Mir146        | chr11:43374396-43374461   | 0.0001 | 3.2219 | 14.9756 | 0.390547 |
| Pik3r6        | chr11:68503018-68552698   | 0.0001 | 0.1586 | 10.6309 | 0.347084 |
| Gm11196       | chr11:78585160-78585555   | 0.2163 | 1.2983 | 2.5854  | 0.125453 |
| Gm11199       | chr11:79451940-79452447   | 0.2949 | 0.5196 | 0.8172  | 0.748202 |
| AU040972      | chr11:79481718-79484031   | 0.0001 | 0.6340 | 12.6302 | 0.341919 |
| Wfdc21        | chr11:83746939-83752642   | 0.0001 | 0.4351 | 12.0873 | 0.395211 |
| Lrrc46        | chr11:97034601-97041407   | 0.0001 | 0.1940 | 10.9218 | 0.406658 |
| Pnmt          | chr11:98386449-98388181   | 0.0001 | 0.1979 | 10.9506 | 0.436588 |
| Gm11940       | chr11:99387339-99387897   | 0.0001 | 1.3801 | 13.7525 | 0.311075 |
| Gm11615       | chr11:101264761-101266303 | 0.0001 | 0.4994 | 12.2858 | 0.378650 |
| Gm1564        | chr11:102663715-102682237 | 0.0186 | 0.0865 | 2.2179  | 0.245419 |
| Higd1b        | chr11:102835848-102838040 | 0.0001 | 0.7518 | 12.8761 | 0.399886 |
| Ace           | chr11:105967944-105989964 | 0.0001 | 0.0723 | 9.4969  | 0.127722 |
| Gm11722       | chr11:107481915-107483107 | 0.1021 | 1.5597 | 3.9326  | 0.271177 |
| A830035A12Rik | chr11:107531756-107548373 | 0.0497 | 0.4291 | 3.1100  | 0.331452 |
| Gm11745       | chr11:117134597-117135045 | 0.0478 | 0.9827 | 4.3627  | 0.323313 |
| 6030468B19Rik | chr11:117797659-117807301 | 0.0001 | 0.3760 | 11.8767 | 0.139211 |
| Gm11750       | chr11:118791371-118793828 | 0.0001 | 0.4519 | 12.1418 | 0.436588 |
| Bahcc1        | chr11:120232946-120292296 | 0.0001 | 0.0206 | 7.6887  | 0.436588 |
| NA            | chr11:121297748-121297819 | 2.2195 | 5.0530 | 1.1869  | 0.613221 |
| NA            | chr12:21367717-21367791   | 0.5772 | 6.7397 | 3.5455  | 0.189525 |
| Gm24359       | chr12:35000336-35000557   | 0.0001 | 1.5422 | 13.9127 | 0.223748 |
| Aldoart2      | chr12:55565238-55566896   | 0.0001 | 0.1696 | 10.7275 | 0.436588 |
| Gm11025       | chr12:57272663-57273312   | 0.4732 | 0.3943 | -0.2631 | 0.867716 |
| Rpl21-ps3     | chr12:59094054-59094537   | 0.2699 | 0.5208 | 0.9482  | 0.647371 |
| Gm26531       | chr12:85962597-85979014   | 0.0001 | 0.1377 | 10.4271 | 0.291075 |
| Ighv3-6       | chr12:114288156-114288582 | 0.4371 | 1.5404 | 1.8171  | 0.578660 |
| Ighv6-6       | chr12:114434787-114435244 | 0.0001 | 1.1441 | 13.4819 | 0.378650 |
| Ighv10-1      | chr12:114479004-114479451 | 0.0001 | 0.5834 | 12.5103 | 0.390547 |
| Ptprn2        | chr12:116485719-117278167 | 0.0001 | 0.1041 | 10.0232 | 0.206326 |
| Trgj2         | chr13:19311244-19311304   | 0.0001 | 6.4540 | 15.9779 | 0.261589 |
| Zfp389        | chr13:21504315-21506524   | 0.0001 | 0.2888 | 11.4958 | 0.343740 |
| Gm5447        | chr13:30974203-30975976   | 0.1384 | 0.3237 | 1.2259  | 0.456920 |
| Gcm2          | chr13:41101426-41109988   | 0.0001 | 0.0977 | 9.9320  | 0.436588 |
| F12           | chr13:55417957-55426793   | 0.0001 | 0.1675 | 10.7102 | 0.273456 |
| Catsper3      | chr13:55784567-55808998   | 0.0602 | 0.1530 | 1.3469  | 0.573092 |
| Gm24539       | chr13:62136929-62137062   | 1.2292 | 3.4328 | 1.4817  | 0.621405 |
| Gm16132       | chr13:63376760-63381045   | 0.0001 | 0.5037 | 12.2984 | 0.184020 |
| Slc9a3        | chr13:74121514-74166064   | 0.0516 | 0.1518 | 1.5576  | 0.578413 |
| Gm4149        | chr13:75644863-75645226   | 0.4460 | 1.3192 | 1.5647  | 0.367003 |
| Mir682        | chr13:75645045-75645141   | 1.6814 | 3.7296 | 1.1493  | 0.596505 |
| Gm25109       | chr13:94517161-94517275   | 1.3112 | 3.9318 | 1.5843  | 0.249627 |
| Gm17160       | chr13:102762434-102764785 | 0.0001 | 1.8136 | 14.1466 | 0.395824 |
| 3830408C21Rik | chr13:107031962-107033673 | 0.0375 | 0.4725 | 3.6540  | 0.379428 |
| Gm2822        | chr13:108313098-108316273 | 0.0001 | 0.0861 | 9.7504  | 0.340693 |
| Gm20432       | chr5:25433035-25433285    | 0.5126 | 1.8886 | 1.8815  | 0.419335 |
| Rnf32         | chr5:29195991-29225524    | 0.0391 | 0.2035 | 2.3804  | 0.264305 |
| 4632411P08Rik | chr5:29378698-29390488    | 0.0001 | 0.0981 | 9.9377  | 0.181451 |
| Mir1960       | chr5:30170738-30170816    | 0.0001 | 4.4359 | 15.4369 | 0.322417 |
| Gm15461       | chr5:30817976-30822612    | 1.1907 | 0.8035 | -0.5674 | 0.718665 |
| Bst1          | chr5:43818885-43843247    | 0.0001 | 0.1274 | 10.3146 | 0.307250 |
| Gm16015       | chr5:43909214-43909885    | 0.0001 | 1.6341 | 13.9962 | 0.322593 |
| Rbm47         | chr5:66016548-66173117    | 0.0126 | 0.0760 | 2.5977  | 0.345776 |
| Arl9          | chr5:77004054-77010606    | 0.0001 | 0.6475 | 12.6606 | 0.354085 |
| Gm23222       | chr5:100500142-100500218  | 0.0001 | 6.3402 | 15.9522 | 0.310487 |
| Pkd2          | chr5:104459449-104505819  | 0.0001 | 0.0308 | 8.2655  | 0.307964 |
| Crybb1        | chr5:112255814-112269585  | 0.0001 | 0.3032 | 11.5659 | 0.436588 |
| Oas1g         | chr5:120876141-120887613  | 0.0001 | 0.1052 | 10.0394 | 0.306152 |
| Morn3         | chr5:123035768-123047016  | 0.0948 | 0.3057 | 1.6895  | 0.346045 |
| Gm6444        | chr5:123066241-123066699  | 0.1224 | 0.7629 | 2.6396  | 0.347265 |
| Pitpnm2os2    | chr5:124194906-124200346  | 0.0140 | 1.6796 | 6.9101  | 0.410787 |
| Gm6139        | chr5:129622989-129623655  | 0.1151 | 0.3786 | 1.7176  | 0.437445 |
| Fzd9          | chr5:135248937-135251230  | 0.0560 | 0.1887 | 1.7534  | 0.489593 |
| Ephb4         | chr5:137350108-137378669  | 0.0001 | 0.0531 | 9.0521  | 0.436588 |
| Sdk1          | chr5:141241489-142215586  | 0.0001 | 0.0219 | 7.7735  | 0.404432 |

|               |                          |        |        |         |          |
|---------------|--------------------------|--------|--------|---------|----------|
| Gm6433        | chr5:141267580-141268455 | 0.2728 | 0.6416 | 1.2337  | 0.135150 |
| Gm15409       | chr5:148959277-148961712 | 0.0540 | 0.5137 | 3.2507  | 0.251563 |
| Gm6578        | chr6:12099517-12109583   | 0.0001 | 0.1786 | 10.8021 | 0.436588 |
| Vwde          | chr6:13185612-13224965   | 0.0001 | 0.0885 | 9.7891  | 0.345599 |
| Gm13899       | chr6:17711686-17712941   | 0.0511 | 0.6447 | 3.6561  | 0.267814 |
| Gm14532       | chr6:31356742-31372369   | 0.0001 | 1.5642 | 13.9332 | 0.392451 |
| Akr1d1        | chr6:37530172-37568815   | 0.0001 | 0.0900 | 9.8145  | 0.400019 |
| Wee2          | chr6:40442862-40466813   | 0.0001 | 0.1701 | 10.7318 | 0.300746 |
| Gm25108       | chr6:42275649-42275727   | 0.0001 | 4.4302 | 15.4351 | 0.384541 |
| Gm24355       | chr6:52639233-52639355   | 1.3400 | 2.9672 | 1.1469  | 0.552267 |
| Fkbp14        | chr6:54577603-54597344   | 0.0256 | 0.0915 | 1.8378  | 0.481283 |
| Snca          | chr6:60731572-60829855   | 0.0001 | 0.1563 | 10.6096 | 0.296368 |
| Smyd1         | chr6:71213939-71322233   | 0.0001 | 0.0788 | 9.6215  | 0.225117 |
| Tacr1         | chr6:82402474-82560103   | 0.0635 | 0.0665 | 0.0655  | 0.964515 |
| Noto          | chr6:85423885-85428876   | 0.0001 | 0.3156 | 11.6238 | 0.124825 |
| 4930590J08Rik | chr6:91914758-91950640   | 0.0153 | 0.1129 | 2.8796  | 0.499460 |
| Magi1         | chr6:93675454-94283322   | 0.0029 | 0.1191 | 5.3734  | 0.260435 |
| Gm16199       | chr6:120005997-120006285 | 0.0001 | 1.3264 | 13.6952 | 0.416433 |
| Gm16557       | chr6:122563282-122563473 | 0.0001 | 1.9437 | 14.2465 | 0.346741 |
| Clec4b1       | chr6:123049961-123071555 | 0.0001 | 0.2913 | 11.5081 | 0.436588 |
| Clec4b2       | chr6:123172892-123204671 | 0.0001 | 0.2544 | 11.3127 | 0.436588 |
| Klri2         | chr6:129729040-129740484 | 0.0110 | 0.3767 | 5.0961  | 0.323906 |
| Klra7         | chr6:130218604-130233322 | 0.0001 | 0.2143 | 11.0654 | 0.335828 |
| Klra13-ps     | chr6:130291160-130306432 | 0.0001 | 0.3646 | 11.8320 | 0.436588 |
| D6Ert474e     | chr6:143245887-143297272 | 0.0001 | 0.1123 | 10.1335 | 0.218287 |
| Gm21814       | chr6:149582011-149583656 | 0.0001 | 1.1034 | 13.4297 | 0.092847 |
| Tarm1         | chr7:3489078-3502465     | 0.0001 | 0.3647 | 11.8373 | 0.436588 |
| Ssc5d         | chr7:4925843-4944821     | 0.0001 | 0.0647 | 9.3378  | 0.292089 |
| Gm5321        | chr7:6019021-6019468     | 0.5637 | 0.6232 | 0.1447  | 0.902277 |
| Gm26325       | chr7:12930773-12930880   | 0.0001 | 2.0983 | 14.3569 | 0.400393 |
| Snord23       | chr7:15938761-15938870   | 0.0001 | 3.1293 | 14.9335 | 0.148901 |
| Dact3         | chr7:16875316-16887301   | 0.0001 | 0.1828 | 10.8362 | 0.039725 |
| Ckm           | chr7:19411093-19421583   | 0.0001 | 0.2334 | 11.1884 | 0.124359 |
| Cadm4         | chr7:24482022-24504539   | 0.0297 | 0.2732 | 3.1995  | 0.382029 |
| Cd177         | chr7:24743984-24760311   | 0.0316 | 0.1717 | 2.4423  | 0.493611 |
| Fxyd3         | chr7:31068171-31076704   | 0.0001 | 0.0738 | 9.5274  | 0.258279 |
| Kctd15        | chr7:34639013-34655509   | 0.0001 | 0.0926 | 9.8546  | 0.408596 |
| Rpl17-ps9     | chr7:36118273-36118828   | 0.2934 | 0.7425 | 1.3394  | 0.584219 |
| Siglecf       | chr7:43351340-43359531   | 0.0001 | 0.1149 | 10.1657 | 0.196938 |
| Cd33          | chr7:43527455-43533171   | 0.0167 | 0.2206 | 3.7225  | 0.388503 |
| Klk1b8        | chr7:43950663-43954941   | 0.0001 | 0.3476 | 11.7633 | 0.436588 |
| Lin7b         | chr7:45367890-45370583   | 0.0439 | 0.2606 | 2.5702  | 0.081791 |
| Apba2         | chr7:64501705-64753870   | 0.0001 | 0.0470 | 8.8758  | 0.436588 |
| Synn          | chr7:67730160-67759742   | 0.0055 | 0.0439 | 2.9879  | 0.413891 |
| Wdr93         | chr7:79743162-79785950   | 0.0188 | 0.1468 | 2.9662  | 0.248245 |
| 2610034B18Rik | chr7:79925360-79935359   | 0.0001 | 0.2177 | 11.0882 | 0.235731 |
| Gm2115        | chr7:84528974-84578337   | 0.1045 | 0.0955 | -0.1300 | 0.952125 |
| B3gnt6        | chr7:98192419-98199481   | 0.0001 | 0.1270 | 10.3111 | 0.160556 |
| Trim30b       | chr7:104355381-104369884 | 0.0001 | 0.0966 | 9.9156  | 0.235366 |
| Mrps36-ps2    | chr7:105690258-105690567 | 0.0001 | 0.6820 | 12.7356 | 0.436588 |
| Olf695        | chr7:106713731-106716345 | 0.0228 | 0.2633 | 3.5304  | 0.475612 |
| Trim66        | chr7:109449005-109508134 | 0.0001 | 0.0295 | 8.2023  | 0.404436 |
| Gm14423       | chr7:122550434-122550555 | 0.0001 | 1.5605 | 13.9297 | 0.395211 |
| Nupr1         | chr7:126623248-126627010 | 0.0436 | 0.1571 | 1.8481  | 0.554451 |
| Odf3          | chr7:140847804-140851018 | 0.0622 | 0.3848 | 2.6297  | 0.413841 |
| Kcnq1         | chr7:143107253-143427042 | 0.0001 | 0.2807 | 11.4547 | 0.307481 |
| Shank2        | chr7:144001927-144424494 | 0.0001 | 0.0277 | 8.1143  | 0.300433 |
| 1700016D06Rik | chr8:11654920-11678750   | 0.0001 | 0.3092 | 11.5942 | 0.311341 |
| Gm25014       | chr8:13283114-13283214   | 0.0001 | 2.9231 | 14.8352 | 0.247997 |
| Snord13       | chr8:31149863-31149967   | 0.4107 | 6.0093 | 3.8709  | 0.284228 |
| Gm10654       | chr8:70931404-70933037   | 0.0001 | 0.3135 | 11.6141 | 0.345131 |
| Gm10282       | chr8:72304117-72305276   | 0.0001 | 0.3366 | 11.7167 | 0.281765 |
| Gm8054        | chr8:78869400-78869868   | 0.3777 | 0.7853 | 1.0559  | 0.672690 |
| Gm26887       | chr8:84192773-84197667   | 0.0001 | 0.7012 | 12.7755 | 0.164601 |
| Hp            | chr8:109575129-109579172 | 0.0160 | 0.3181 | 4.3132  | 0.187456 |
| Gm22193       | chr8:110842382-110842458 | 3.5074 | 5.3646 | 0.6131  | 0.652206 |
| Gm10614       | chr8:120589530-120593801 | 0.0001 | 0.1721 | 10.7491 | 0.308606 |
| NA            | chr8:123376891-123377175 | 0.0001 | 0.9275 | 13.1792 | 0.436588 |
| Gm24918       | chr9:3352656-3352786     | 0.0001 | 2.1795 | 14.4117 | 0.183597 |
| Mmp8          | chr9:7558428-7568486     | 0.0001 | 0.4265 | 12.0583 | 0.345559 |
| Gm16164       | chr9:22677850-22678318   | 0.2330 | 0.3753 | 0.6880  | 0.780853 |



|               |                           |        |        |         |          |
|---------------|---------------------------|--------|--------|---------|----------|
| Arhgap32      | chr9:32116135-32268446    | 0.0001 | 0.0194 | 7.5992  | 0.163600 |
| Gm17099       | chr9:45172996-45175161    | 0.0001 | 0.7899 | 12.9474 | 0.314779 |
| Ncam1         | chr9:49504360-49798922    | 0.0001 | 0.0621 | 9.2780  | 0.272580 |
| 1810046K07Rik | chr9:51289685-51328917    | 0.1338 | 0.3484 | 1.3804  | 0.614340 |
| Gm6257        | chr9:63443165-63444075    | 0.1409 | 0.4757 | 1.7555  | 0.451589 |
| Gm16218       | chr9:65297531-65297919    | 0.1652 | 0.9525 | 2.5276  | 0.256213 |
| Gm22657       | chr9:65952313-65952445    | 0.0001 | 3.3592 | 15.0358 | 0.154445 |
| Aph1c         | chr9:66814993-66834726    | 0.0001 | 0.0713 | 9.4781  | 0.308788 |
| Scg3          | chr9:75643263-75683996    | 0.0001 | 0.1328 | 10.3754 | 0.436588 |
| 9430037G07Rik | chr9:88595324-88599516    | 0.0058 | 0.0701 | 3.6025  | 0.352981 |
| Gm6223        | chr9:90118888-90120741    | 0.0808 | 0.1584 | 0.9717  | 0.634044 |
| 1700057G04Rik | chr9:92309376-92357876    | 0.0326 | 0.0891 | 1.4520  | 0.625374 |
| Trim42        | chr9:97349561-97369958    | 0.0001 | 0.1142 | 10.1570 | 0.436588 |
| Camkv         | chr9:107935919-107949691  | 0.0353 | 0.1094 | 1.6305  | 0.454764 |
| 2310075C17Rik | chr9:112227578-112228242  | 0.0001 | 1.0235 | 13.3212 | 0.436588 |
| 4930516B21Rik | chr9:119440277-119444830  | 0.0001 | 0.2058 | 11.0072 | 0.436588 |
| Zfp105        | chr9:122923071-122931028  | 0.0001 | 0.1149 | 10.1662 | 0.397325 |
| Mir188        | chrX:7247988-7248056      | 0.0001 | 6.1976 | 15.9194 | 0.436588 |
| Gm14720       | chrX:7714332-7722100      | 0.0001 | 0.7216 | 12.8170 | 0.157178 |
| Gm6829        | chrX:9327748-9328108      | 0.0001 | 1.2161 | 13.5700 | 0.090661 |
| Sytl5         | chrX:9885621-9994543      | 0.0001 | 0.2272 | 11.1499 | 0.360502 |
| Gm9432        | chrX:12619473-12620232    | 0.0001 | 0.2777 | 11.4394 | 0.436588 |
| Gm5380        | chrX:13302284-13304420    | 0.0001 | 0.2362 | 11.2055 | 0.279634 |
| Gpr82         | chrX:13661362-13667433    | 0.0001 | 0.1521 | 10.5708 | 0.262140 |
| Fhl1          | chrX:56731786-56793346    | 0.0001 | 0.0568 | 9.1506  | 0.436588 |
| Mir505        | chrX:60394402-60394492    | 0.0001 | 2.1463 | 14.3895 | 0.436588 |
| Gm15384       | chrX:75551116-75551824    | 0.1758 | 0.9055 | 2.3645  | 0.376515 |
| Gm23121       | chrX:77579486-77579659    | 0.0001 | 3.8206 | 15.2215 | 0.303061 |
| Gm6964        | chrX:85793683-85794120    | 0.3910 | 0.8288 | 1.0839  | 0.503351 |
| Gm14762       | chrX:85825891-85834831    | 0.0001 | 0.1499 | 10.5493 | 0.326238 |
| Gm6977        | chrX:90744545-90745062    | 0.0001 | 0.5145 | 12.3291 | 0.436588 |
| Mir223        | chrX:96242816-96242926    | 0.0001 | 1.7561 | 14.1001 | 0.436588 |
| Gdpd2         | chrX:100729872-100738895  | 0.0001 | 0.0449 | 8.8098  | 0.398819 |
| Gm14866       | chrX:100736982-100740929  | 0.0102 | 0.0913 | 3.1646  | 0.487334 |
| Gm14858       | chrX:102252521-102365498  | 0.0912 | 0.3104 | 1.7668  | 0.298148 |
| Mir421        | chrX:103572914-103572999  | 0.0001 | 4.1870 | 15.3536 | 0.280010 |
| Gm9673        | chrX:105032585-105033366  | 0.0001 | 0.3642 | 11.8304 | 0.195728 |
| Gm4992        | chrX:121913226-121913994  | 0.0634 | 0.4860 | 2.9388  | 0.310263 |
| Nxf2          | chrX:134944525-134964754  | 0.0001 | 0.2257 | 11.1401 | 0.075597 |
| Gm15190       | chrX:159584782-159585058  | 0.0001 | 2.0861 | 14.3485 | 0.321930 |
| Tlr8          | chrX:167242695-167264329  | 0.0001 | 0.1509 | 10.5590 | 0.313601 |
| Ugt3a2        | chr15:9335549-9370955     | 0.0001 | 0.1127 | 10.1380 | 0.198796 |
| Prlr          | chr15:10177237-10349180   | 0.0001 | 0.0438 | 8.7746  | 0.272352 |
| Gm24771       | chr15:35487399-35487536   | 0.0001 | 3.1945 | 14.9633 | 0.110935 |
| Fbxo43        | chr15:36150059-36164884   | 0.0054 | 0.0694 | 3.6862  | 0.437532 |
| Angpt1        | chr15:42424726-42676977   | 0.0001 | 0.0785 | 9.6164  | 0.436588 |
| Fer1f6        | chr15:58510047-58665092   | 0.0001 | 0.0464 | 8.8580  | 0.224553 |
| Mafa          | chr15:75746842-75747922   | 0.0001 | 0.2665 | 11.3797 | 0.227175 |
| Apol11b       | chr15:77633950-77643286   | 0.0001 | 0.1004 | 9.9718  | 0.295398 |
| Gm22067       | chr15:81592092-81592199   | 0.3992 | 5.1313 | 3.6841  | 0.371025 |
| Ppara         | chr15:85734982-85802819   | 0.0335 | 0.1145 | 1.7737  | 0.583236 |
| Gm24011       | chr15:86149583-86149851   | 0.0001 | 1.3150 | 13.6828 | 0.261760 |
| Gm20621       | chr15:88889779-88891525   | 0.0733 | 0.4028 | 2.4576  | 0.282578 |
| Mapk8ip2      | chr15:89453912-89464468   | 0.0001 | 0.0900 | 9.8136  | 0.094227 |
| Ccdc65        | chr15:98708206-98723326   | 0.0001 | 0.1209 | 10.2394 | 0.436588 |
| 4930578M01Rik | chr15:98985964-98989281   | 0.0001 | 0.6332 | 12.6283 | 0.210632 |
| 6030408B16Rik | chr15:101293211-101296615 | 0.0001 | 0.5327 | 12.3792 | 0.345259 |
| Krt80         | chr15:101349570-101370125 | 0.0001 | 0.2007 | 10.9709 | 0.280010 |
| Gm10406       | chr14:7006114-7027449     | 0.0532 | 0.2095 | 1.9786  | 0.250732 |
| Mir3075       | chr14:25534438-25534523   | 0.0001 | 3.4118 | 15.0582 | 0.272580 |
| Eif1-ps1      | chr14:40006219-40006555   | 0.0001 | 0.6272 | 12.6148 | 0.436588 |
| Trav12d-1     | chr14:52844464-52845039   | 0.0001 | 0.8285 | 13.0163 | 0.145315 |
| Trav14d-1     | chr14:52855613-52856165   | 0.4643 | 0.6472 | 0.4793  | 0.813304 |
| Trdv2-1       | chr14:53946072-53946660   | 0.0001 | 1.2725 | 13.6354 | 0.436588 |
| Npm2          | chr14:70647301-70653084   | 0.0001 | 0.3310 | 11.6924 | 0.412154 |
| Dach1         | chr14:97786852-98169765   | 0.0001 | 0.0265 | 8.0497  | 0.436588 |
| Mir17         | chr14:115043670-115043754 | 1.2711 | 4.8827 | 1.9416  | 0.486217 |
| NA            | chr14:119290171-119290238 | 0.0001 | 5.5038 | 15.7482 | 0.436588 |
| Nalcn         | chr14:123276640-123627144 | 0.0001 | 0.0939 | 9.8747  | 0.436588 |
| Gm26622       | chr17:5837967-5838265     | 0.0001 | 0.9878 | 13.2700 | 0.300433 |
| Dynl1b        | chr17:6430111-6436293     | 0.0557 | 0.5096 | 3.1934  | 0.364217 |

|               |                          |        |        |         |          |
|---------------|--------------------------|--------|--------|---------|----------|
| Mas1          | chr17:12841078-12868143  | 0.0001 | 0.1518 | 10.5681 | 0.364341 |
| Prss30        | chr17:23972125-23975230  | 0.1152 | 0.1433 | 0.3139  | 0.836331 |
| Rnf151        | chr17:24715838-24718057  | 0.0001 | 0.3956 | 11.9497 | 0.374533 |
| Cbs           | chr17:31612622-31637199  | 0.0001 | 0.1054 | 10.0415 | 0.159729 |
| Cyp4f39       | chr17:32468461-32492479  | 0.1494 | 0.2594 | 0.7959  | 0.553307 |
| Ncr3-ps       | chr17:35180534-35184662  | 0.0001 | 0.9044 | 13.1427 | 0.191257 |
| Gm27670       | chr17:35253950-35254039  | 0.7199 | 1.9731 | 1.4547  | 0.625374 |
| Psors1c2      | chr17:35533200-35534647  | 0.0001 | 0.3303 | 11.6895 | 0.366441 |
| 2410017117Rik | chr17:36145017-36162573  | 0.0001 | 0.1794 | 10.8091 | 0.266836 |
| Ubd           | chr17:37193891-37196095  | 0.0001 | 0.4150 | 12.0190 | 0.436588 |
| Frs3          | chr17:47689029-47704286  | 0.0274 | 0.1499 | 2.4518  | 0.153385 |
| Emr4          | chr17:55749983-55853662  | 0.0081 | 0.1691 | 4.3795  | 0.304253 |
| Rasgrp3       | chr17:75435904-75529043  | 0.0384 | 0.1389 | 1.8549  | 0.447333 |
| Gm4279        | chr16:11688168-11691857  | 0.0001 | 0.1505 | 10.5554 | 0.216571 |
| Igll1         | chr16:16860670-16863985  | 0.0001 | 0.4258 | 12.0561 | 0.346197 |
| Gm15646       | chr16:17139674-17140483  | 0.0001 | 0.5643 | 12.4623 | 0.314001 |
| Gm25777       | chr16:18240716-18240842  | 1.5253 | 3.1951 | 1.0668  | 0.678723 |
| Mir1224       | chr16:20604451-20604536  | 0.0001 | 3.0530 | 14.8979 | 0.322417 |
| Gm26744       | chr16:21843450-21845776  | 0.0001 | 0.1827 | 10.8352 | 0.436588 |
| Gm15694       | chr16:31987177-31987460  | 0.3019 | 1.6275 | 2.4305  | 0.106528 |
| Maats1os      | chr16:38302615-38305020  | 0.0001 | 0.9696 | 13.2432 | 0.436588 |
| 4932412D23Rik | chr16:42725701-42875762  | 0.0001 | 0.0553 | 9.1108  | 0.436588 |
| Myh15         | chr16:49057485-49199104  | 0.0310 | 0.0538 | 0.7941  | 0.697384 |
| Tmem30c       | chr16:57266138-57292865  | 0.0001 | 0.1456 | 10.5083 | 0.232639 |
| Gm26800       | chr16:57280889-57281496  | 0.0001 | 1.1536 | 13.4939 | 0.412994 |
| Olfr177       | chr16:58872218-58873148  | 0.1379 | 0.2996 | 1.1198  | 0.539118 |
| Olfr181       | chr16:58925556-58928644  | 0.0001 | 0.4237 | 12.0488 | 0.336210 |
| Mir155        | chr16:84714139-84714204  | 0.0001 | 3.4252 | 15.0639 | 0.353103 |
| Ripply3       | chr16:94328419-94336935  | 0.0001 | 0.3572 | 11.8027 | 0.091892 |
| Ripk4         | chr16:97741932-97763737  | 0.0346 | 0.1339 | 1.9539  | 0.425327 |
| Gm26901       | chr1:7349405-7397801     | 0.0001 | 0.2136 | 11.0607 | 0.374526 |
| Gm3940        | chr1:52090634-52091066   | 0.1638 | 1.4324 | 3.1285  | 0.153685 |
| Gm16107       | chr1:52873136-52873998   | 0.0001 | 0.5005 | 12.2892 | 0.195679 |
| Rps27-ps1     | chr1:63073773-63074019   | 0.3473 | 2.8958 | 3.0597  | 0.271023 |
| Fn1           | chr1:71585522-71653171   | 0.0001 | 0.1496 | 10.5473 | 0.386811 |
| Cxcr2         | chr1:74153988-74161238   | 0.0071 | 0.2113 | 4.8906  | 0.295248 |
| Sphkap        | chr1:83254138-83408200   | 0.0001 | 0.0403 | 8.6558  | 0.436588 |
| Pid1          | chr1:84036295-84364180   | 0.0001 | 0.0469 | 8.8749  | 0.135051 |
| Serpinb10     | chr1:107529002-107549271 | 0.0429 | 0.1018 | 1.2460  | 0.586724 |
| NA            | chr1:107535507-107547072 | 0.1110 | 0.3550 | 1.6777  | 0.529234 |
| Gm23939       | chr1:133601222-133601355 | 0.0001 | 5.4696 | 15.7391 | 0.220271 |
| Gm26706       | chr1:133610410-133614422 | 0.0001 | 0.3636 | 11.8279 | 0.209539 |
| Gm26979       | chr1:137917689-137921312 | 0.0001 | 1.7543 | 14.0986 | 0.389609 |
| Rgs18         | chr1:144752682-144775435 | 0.0001 | 0.1933 | 10.9164 | 0.194956 |
| Lhx4          | chr1:155698035-155742120 | 0.0001 | 0.0393 | 8.6183  | 0.364263 |
| Gm23528       | chr1:160645572-160645704 | 0.0001 | 3.1975 | 14.9646 | 0.297852 |
| Tnfrsf18      | chr1:161494654-161505290 | 0.0001 | 0.3610 | 11.8180 | 0.246696 |
| Fcgr4         | chr1:171018919-171029761 | 0.0001 | 0.3185 | 11.6373 | 0.363263 |
| A1607873      | chr1:173723429-173741809 | 0.0062 | 0.2002 | 5.0054  | 0.227323 |
| Gm23805       | chr1:175904544-175904651 | 0.0001 | 3.4221 | 15.0626 | 0.383716 |
| 6330403A02Rik | chr1:180432386-180483504 | 0.0001 | 0.0448 | 8.8073  | 0.374507 |
| NA            | chr1:180733794-180733882 | 0.0001 | 2.6455 | 14.6913 | 0.333305 |
| Hlx           | chr1:184727139-184732619 | 0.0001 | 0.1210 | 10.2412 | 0.240798 |
| Gm26574       | chr1:189833140-189836620 | 0.0001 | 0.1946 | 10.9262 | 0.242008 |
| Atf3          | chr1:191170295-191183340 | 0.0001 | 0.1923 | 10.9090 | 0.221980 |
| NA            | chr19:6359373-6359433    | 0.0001 | 4.6826 | 15.5150 | 0.436588 |
| Gm16437       | chr19:7668286-7668793    | 0.0422 | 0.6156 | 3.8662  | 0.253985 |
| Gm10212       | chr19:11569446-11573114  | 0.0001 | 0.5977 | 12.5453 | 0.352450 |
| Gm17068       | chr19:16277796-16278776  | 0.0001 | 0.4596 | 12.1663 | 0.287310 |
| Blnk          | chr19:40928926-40994535  | 0.0001 | 0.0471 | 8.8782  | 0.225791 |
| Slit1         | chr19:41600256-41743665  | 0.0001 | 0.1269 | 10.3089 | 0.304049 |
| Neurl1a       | chr19:47178819-47259440  | 0.0001 | 0.1304 | 10.3491 | 0.259465 |
| Sorcs1        | chr19:50143300-50678646  | 0.0373 | 0.0511 | 0.4524  | 0.774755 |
| Plekhs1       | chr19:56461636-56486729  | 0.0001 | 0.1186 | 10.2114 | 0.263462 |
| Gm13220       | chr2:9575835-9576343     | 0.0001 | 0.6743 | 12.7192 | 0.390845 |
| Gm24806       | chr2:10517336-10517426   | 1.5563 | 4.3207 | 1.4732  | 0.372280 |
| Gm13356       | chr2:22762743-22763078   | 0.0837 | 1.0484 | 3.6466  | 0.472564 |
| Ccdc183       | chr2:25608634-25617678   | 0.0903 | 0.0778 | -0.2156 | 0.887160 |
| Fcnb          | chr2:28076377-28084885   | 0.0001 | 0.1837 | 10.8431 | 0.436588 |
| 1700026L06Rik | chr2:28692079-28699727   | 0.0001 | 0.5282 | 12.3669 | 0.203872 |
| Gm16323       | chr2:30413715-30415338   | 0.4031 | 0.9177 | 1.1868  | 0.325467 |

|               |                          |        |        |         |          |
|---------------|--------------------------|--------|--------|---------|----------|
| Ppapdc3       | chr2:32095527-32110820   | 0.0001 | 0.1081 | 10.0778 | 0.304619 |
| Gm25632       | chr2:32225652-32225737   | 0.0001 | 4.1012 | 15.3238 | 0.380969 |
| Gm13407       | chr2:34412987-34413347   | 0.4746 | 1.9112 | 2.0096  | 0.246086 |
| Gm13522       | chr2:52385915-52388260   | 0.0001 | 0.8161 | 12.9946 | 0.132000 |
| Bloc1s2-ps    | chr2:52619731-52620601   | 0.0246 | 0.5685 | 4.5279  | 0.150733 |
| Gm13535       | chr2:57272563-57275686   | 0.0001 | 0.1773 | 10.7918 | 0.340693 |
| Acvr1         | chr2:58388643-58567157   | 0.0001 | 0.0987 | 9.9471  | 0.262550 |
| Gm13642       | chr2:71412530-71412917   | 0.7935 | 0.9970 | 0.3294  | 0.689132 |
| Gm13920       | chr2:102057586-102061430 | 0.0001 | 0.1242 | 10.2784 | 0.398819 |
| Cd59a         | chr2:104095800-104115354 | 0.0119 | 0.3129 | 4.7177  | 0.412165 |
| Gm13977       | chr2:115556785-115581555 | 0.0001 | 0.0805 | 9.6529  | 0.136568 |
| Ankrd63       | chr2:118699102-118703963 | 0.0045 | 0.0684 | 3.9274  | 0.284207 |
| Gchfr         | chr2:119167772-119172390 | 0.2318 | 0.5017 | 1.1136  | 0.532837 |
| Chac1         | chr2:119351228-119354381 | 0.0001 | 0.2032 | 10.9888 | 0.302198 |
| Gm14025       | chr2:129038144-129048172 | 0.0231 | 0.2223 | 3.2691  | 0.445881 |
| Gm14022       | chr2:129060945-129065686 | 0.0001 | 0.5977 | 12.5451 | 0.319963 |
| Gm14284       | chr2:131322087-131322366 | 0.6335 | 1.4813 | 1.2254  | 0.303990 |
| Gm14211       | chr2:135686173-135693154 | 0.0001 | 0.6998 | 12.7727 | 0.352779 |
| Gm23598       | chr2:150883722-150883866 | 0.0001 | 1.7085 | 14.0604 | 0.306152 |
| 1700003F12Rik | chr2:154547084-154550003 | 0.0001 | 0.3832 | 11.9038 | 0.198720 |
| 4930519P11Rik | chr2:154612936-154613437 | 0.0427 | 0.6387 | 3.9020  | 0.143970 |
| Mafb          | chr2:160363676-160367065 | 0.0001 | 0.0571 | 9.1572  | 0.436588 |
| Ocstamp       | chr2:165393759-165400405 | 0.0001 | 0.0625 | 9.2882  | 0.436588 |
| Slc13a3       | chr2:165405027-165473230 | 0.0001 | 0.0723 | 9.4977  | 0.272799 |
| Gm11464       | chr2:165980725-165992517 | 0.0001 | 0.6177 | 12.5927 | 0.185917 |
| Gm14296       | chr2:176892508-176927809 | 0.0001 | 0.0214 | 7.7448  | 0.436588 |
| Gm14323       | chr2:177892637-177893264 | 0.0448 | 0.3503 | 2.9679  | 0.426349 |
| Myt1          | chr2:181763331-181827797 | 0.0001 | 0.0656 | 9.3573  | 0.419605 |
| Gm10557       | chr18:4198215-4198969    | 0.3932 | 0.6579 | 0.7427  | 0.591499 |
| Gm26244       | chr18:10150976-10151140  | 0.5031 | 2.1329 | 2.0837  | 0.350442 |
| Gm16558       | chr18:25391800-25392332  | 0.0001 | 0.5152 | 12.3308 | 0.330015 |
| NA            | chr18:31890626-31890715  | 2.1594 | 4.6590 | 1.1094  | 0.601547 |
| Pcdhb4        | chr18:37307454-37311173  | 0.0001 | 0.1288 | 10.3309 | 0.387389 |
| Gm15333       | chr18:39341600-39341964  | 0.0001 | 0.8684 | 13.0842 | 0.436588 |
| Pabpc2        | chr18:39773496-39776082  | 0.0001 | 0.2039 | 10.9935 | 0.376658 |
| Jakmip2       | chr18:43531407-43687773  | 0.0240 | 0.1154 | 2.2629  | 0.304098 |
| Arhgef37      | chr18:61493793-61536536  | 0.0001 | 0.0653 | 9.3500  | 0.436588 |
| Gm24384       | chr18:63909081-63909156  | 0.0001 | 4.2807 | 15.3855 | 0.280542 |
| NA            | chr18:67782504-67782756  | 0.0001 | 1.8553 | 14.1794 | 0.173781 |
| Gm15467       | chr3:8881198-8881643     | 0.0481 | 0.7949 | 4.0472  | 0.325332 |
| Fabp4         | chr3:10204346-10208576   | 0.0001 | 0.5905 | 12.5277 | 0.120373 |
| A930001A20Rik | chr3:14971200-15002727   | 0.0001 | 0.2351 | 11.1992 | 0.280542 |
| Sirpb1a       | chr3:15371826-15426427   | 0.0001 | 0.1986 | 10.9555 | 0.397325 |
| Kcnmb3        | chr3:32472320-32491969   | 0.1187 | 0.6109 | 2.3634  | 0.189372 |
| Rpl32-ps      | chr3:69716985-69717393   | 0.4711 | 1.6032 | 1.7668  | 0.118718 |
| Gm9762        | chr3:78966355-78966799   | 0.0001 | 1.8780 | 14.1969 | 0.273933 |
| Gm3513        | chr3:79551313-79552193   | 0.0001 | 0.2965 | 11.5338 | 0.395211 |
| C2cd4d        | chr3:94362443-94364567   | 0.1461 | 0.1859 | 0.3475  | 0.844621 |
| Oaz3          | chr3:94433389-94436616   | 0.0001 | 0.5769 | 12.4940 | 0.159112 |
| Gja5          | chr3:97032415-97053634   | 0.0001 | 0.1059 | 10.0480 | 0.126316 |
| Gm17651       | chr3:97673030-97674694   | 0.0001 | 7.3166 | 16.1589 | 0.436588 |
| Adora3        | chr3:105870857-105908928 | 0.0001 | 0.1166 | 10.1879 | 0.410299 |
| Eps8l3        | chr3:107877229-107892899 | 0.1154 | 0.0930 | -0.3113 | 0.860005 |
| 4933431E20Rik | chr3:107888849-107896213 | 0.0064 | 0.0517 | 3.0230  | 0.211999 |
| Gstm1         | chr3:108012254-108017973 | 0.2008 | 0.3510 | 0.8056  | 0.537735 |
| Mir669n       | chr3:115979901-115979955 | 2.3726 | 7.9718 | 1.7484  | 0.492597 |
| F3            | chr3:121723536-121735052 | 0.0001 | 0.1452 | 10.5041 | 0.378650 |
| Gm9387        | chr3:128953781-128955098 | 0.0325 | 0.2692 | 3.0492  | 0.112267 |
| Sgms2         | chr3:131318984-131344940 | 0.0183 | 0.0783 | 2.0983  | 0.315945 |
| Bdh2          | chr3:135281220-135304426 | 0.0001 | 0.3305 | 11.6904 | 0.121705 |
| Gm16100       | chr3:135495652-135495883 | 0.5898 | 2.3443 | 1.9909  | 0.372357 |
| Oaz2-ps       | chr3:135525963-135526532 | 0.1194 | 0.5904 | 2.3060  | 0.330785 |
| Gm16325       | chr3:146641931-146651715 | 0.0001 | 0.1878 | 10.8751 | 0.374095 |
| 4930503B20Rik | chr3:146645192-146651317 | 0.0001 | 0.3535 | 11.7875 | 0.368709 |
| Clvs1         | chr4:9269292-9451691     | 0.0001 | 0.0496 | 8.9556  | 0.206033 |
| Al464131      | chr4:41495603-41503076   | 0.0001 | 0.1010 | 9.9795  | 0.436588 |
| Olf157        | chr4:43834751-43836517   | 0.0001 | 0.2154 | 11.0726 | 0.099283 |
| Gm12444       | chr4:46243013-46243890   | 0.0001 | 0.3607 | 11.8166 | 0.335252 |
| n-R5s185      | chr4:53860651-53860770   | 0.0001 | 3.9017 | 15.2518 | 0.305388 |
| Gm12536       | chr4:57300095-57307305   | 0.0001 | 0.8847 | 13.1110 | 0.245023 |
| Gm11211       | chr4:62723515-62727537   | 0.0001 | 0.6570 | 12.6818 | 0.319143 |

|          |                          |        |        |         |          |
|----------|--------------------------|--------|--------|---------|----------|
| Gm11224  | chr4:69954165-69955276   | 0.1154 | 0.9024 | 2.9669  | 0.401194 |
| Gm11250  | chr4:72168767-72169449   | 0.0001 | 0.9345 | 13.1900 | 0.259112 |
| lfne     | chr4:88879537-88880201   | 0.0001 | 0.2910 | 11.5068 | 0.436588 |
| Gm12704  | chr4:95039161-95039625   | 0.1065 | 0.6272 | 2.5582  | 0.461518 |
| NA       | chr4:99272670-99275145   | 0.0001 | 0.0852 | 9.7353  | 0.436588 |
| Ldlrad1  | chr4:107209179-107218060 | 0.0587 | 0.3949 | 2.7500  | 0.167517 |
| Gm12833  | chr4:115480799-115481276 | 0.0001 | 0.5313 | 12.3754 | 0.328111 |
| Col9a2   | chr4:121039384-121055322 | 0.0415 | 0.0611 | 0.5583  | 0.802106 |
| Gm12900  | chr4:123274899-123275472 | 0.0476 | 1.1172 | 4.5513  | 0.161404 |
| Rspo1    | chr4:124986429-125009099 | 0.0001 | 0.1088 | 10.0878 | 0.436588 |
| Col8a2   | chr4:126286792-126314330 | 0.0495 | 0.1328 | 1.4251  | 0.564245 |
| Gm12928  | chr4:126476726-126477299 | 0.0001 | 0.4401 | 12.1035 | 0.279634 |
| Gm13007  | chr4:135997522-135997887 | 0.2303 | 1.5326 | 2.7342  | 0.202512 |
| Ephb2    | chr4:136647538-136835988 | 0.0001 | 0.0335 | 8.3891  | 0.436588 |
| C1qa     | chr4:136895916-136898803 | 0.0001 | 0.5168 | 12.3355 | 0.384892 |
| Arhgef19 | chr4:141239574-141257564 | 0.0001 | 0.0992 | 9.9543  | 0.337958 |
| Clnkb    | chr4:141404352-141416014 | 0.0001 | 0.1433 | 10.4844 | 0.309147 |
| Gm22039  | chr4:143204064-143204196 | 0.0001 | 4.7479 | 15.5350 | 0.201861 |
| Gm13080  | chr4:143611657-143612077 | 0.2035 | 1.0717 | 2.3970  | 0.425414 |
| Gm13245  | chr4:146480666-146480926 | 0.0001 | 1.0557 | 13.3659 | 0.260542 |
| Gm13140  | chr4:146942475-146945825 | 0.0422 | 0.1740 | 2.0439  | 0.301151 |
| Gm13201  | chr4:148071391-148075420 | 0.1049 | 0.3290 | 1.6493  | 0.428953 |
| Gm9506   | chr4:149096382-149096702 | 0.0001 | 1.3089 | 13.6761 | 0.390547 |
| Rbp7     | chr4:149449686-149454978 | 0.0001 | 0.3896 | 11.9277 | 0.402369 |
| n-R5s193 | chr4:149817731-149817840 | 0.0001 | 2.2555 | 14.4611 | 0.436588 |
